# Supplementary material for: Protein remote homology detection based on bidirectional long short-term memory
Source: PubMed Central journal article supplement (PMC5634958; doi:10.1186/s12859-017-1842-2), 2017-10-10
Supplement: 12859_2017_1842_MOESM1_ESM.pdf [file 12859_2017_1842_MOESM1_ESM.pdf]

**Additional file S1.** This independent testing dataset contains 4,679 protein sequences extracted from SCOPe (version 2.06), and none of these proteins share  $\geq 95\%$  sequence identity to any protein in the SCOP benchmark dataset (**Eq. 1**).

---

**Family-1 (a.1.1.2)**

**Positive dataset contains 67 protein sequences.**

d2r80b\_ d3boma\_ d2h8fb\_ d2raoa\_ d3bj1a\_ d4hrrb\_ d2r50a\_ d3d1kb\_  
d2aa1b1\_ d3zhwa\_ d3hf4b\_ d3gdja\_ d3bj1b\_ d1x9fb\_ d1wmub\_ d3bcqb\_  
d3d4xb\_ d2dc3a\_ d3hf4a\_ d4yu3a\_ d3k8ba\_ d2r80a\_ d3bcqa\_ d1v4wa\_  
d3wtgb\_ d4esaa\_ d3d1ab\_ d4h21a\_ d1v4wb\_ d1q1fa\_ d1tu9a1\_ d3d1aa\_  
d3hyub\_ d2zfbb\_ d3fs4a\_ d1shrb\_ d4h21b\_ d4yu3b\_ d3hrwa\_ d3qqra\_  
d3at5a\_ d4wchd\_ d3hyua\_ d2raob\_ d4esab\_ d3gdjb\_ d3qqqa\_ d1x9fc\_  
d3vrfa\_ d3mkba\_ d3d4xa\_ d3mjpa\_ d3fh9a\_ d2dc3b\_ d3eoka\_ d3g46a\_  
d3vrfb\_ d1x9fd\_ d2zfa\_ d3mkbb\_ d3wtga\_ d3fh9b\_ d3bomb\_ d3cy5a\_  
d3at5b\_ d1x9fa\_ d2oifa\_

**Negative dataset contains 3908 protein sequences.**

d1xfda2\_ d1c7ga\_ d2v1pa1\_ d2ez1a\_ d1u08a\_ d1lc5a\_ d1b5pa\_ d2ay1a\_  
d1bw0a\_ d3pd6a\_ d7aata\_ d2csta\_ d1j32a\_ d1fg7a\_ d4wlha\_ d1o4sa\_  
d1v2da\_ d1gdea\_ d1m6sa\_ d1v72a1\_ d1svva\_ d1ajsa\_ d1wsta1\_ d2f8ja2  
d11k9a\_ d1vp4a1\_ d1xi9a1\_ d2gb3a1\_ d1yaaa\_ d2bnma2\_ d2cfba1\_ d1o69a\_  
d1bj4a\_ d3k28a\_ d2bwpa\_ d3lg0a\_ d2fnua\_ d3ou5a\_ d1z7da1\_ d1b9ha\_  
d1iaya\_ d4msoa\_ d1bs0a\_ d1s0aa\_ d1sffa\_ d3tqxa\_ d1mdoa\_ d3qboa\_  
d3pgya\_ d1bjna\_ d2dkja\_ d1ejia\_ d1vefa1\_ d4wxga\_ d3bs8a\_ d3gbxa1  
d1w23a\_ d2tbvc\_ d1c8nc\_ d1x36a\_ d1smvc\_ d1ng0c\_ d4sbvc\_ d1lopa\_  
d1f2nc\_ d1g7ea\_ d1qnia1\_ d1fwxa1\_ d2wo3b\_ d1shxa\_ d1f56a\_ d1bypa\_  
d1azca\_ d1ws8a\_ d3u25a\_ d1cuoa\_ d1id2a\_ d1rkra\_ d2iaac\_ d4dp1x\_  
d1nwpa\_ d2gima\_ d2i7sa\_ d1qhqa\_ d3ehbb1\_ d1fftb1\_ d1gyca3\_ d1hfua2  
d1kbva1\_ d1kbva2\_ d1sdda1\_ d1sdda2\_ d1gyca1\_ d1gyca2\_ d1mzya1\_ d2bw4a1  
d1aoza1\_ d1aoza3\_ d1aoza2\_ d1kyaa2\_ d1kyaa3\_ d1kyaa1\_ d1mzya2\_ d4e9sa1  
d1sddb1\_ d1sddb2\_ d1hfua1\_ d1hfua3\_ d1oe1a2\_ d1oe1a1\_ d1v10a2\_ d1v10a3  
d1v10a1\_ d1novc\_ d2bbvc\_ g1gk9.1\_ g1or0.1\_ g1e3a.1\_ d2bema\_ d1pama1  
d1ea9c1\_ d1qhoa1\_ d2fhfa2\_ d2fhfa1\_ d1k3ia1\_ d1j0ha1\_ d1cxl1a1\_ d2bhua1  
d1ledqa1\_ d1f1sa2\_ d1ut9a2\_ d1gvia1\_ d1txka1\_ d1zx5a1\_ d2phla2\_ d2phla1  
d1fxza2\_ d1fxza1\_ d1lrha\_ d1uija1\_ g1dgw.1\_ d2v09a\_ d1uika2\_ d1uika1  
d1dgwa\_ d1ogpa1\_ d1ktja\_ d1ds6b\_ d1fstb\_ d1ex0a1\_ d1g0da1\_ d1p8ba\_  
d4alac\_ d1pjwa\_ d1rera1\_ d1s6na\_ d3uzqb\_ d1tafa\_ d1bh9b\_ d1tafb\_  
d1jfib\_ d1q9ca\_ d1h3ob\_ d2byka1\_ d1n1ja\_ d4g92b\_ d1bh9a\_ d1jfia\_  
d1h3oa\_ d2bykb1\_ d1eixa\_ d3exra\_ d2ffca1\_ d2fdsa1\_ d3n3ma1\_ d2czda\_  
d1q6oa\_ d2yyua\_ d1vqta1\_ d1dbta\_ d3ldva1\_ d2bjca1\_ d2hsga1\_ d1qpza1  
d1efaa1\_ d1mqta\_ d1d4m3\_ d1fmd3\_ d2mev1\_ g1aym.1\_ d1ev13\_ d4q4w1\_  
d1r1a3\_ d2x5ia\_ d1rhi1\_ g1r1a.1\_ g1d4m.1\_ g1rhi.1\_ d1b35b\_ d1lopa\_  
d1tme1\_ d4iv1a\_ g1pvc.1\_ g1fnp.1\_ d1fnp1\_ d4gb31\_ d1d4m1\_ d1fmd1\_  
d1ev11\_ d2wzr3\_ g1cov.1\_ d1qqp3\_ g1fmd.1\_ d2x5ic\_ d1rhi3\_ g1loop.1  
d1hxs1\_ d1fnp3\_ d1bev1\_ g2mev.1\_ d1eah3\_ d1aym1\_ d1pvc3\_ d1qqp1\_

d1zba3\_ dlh8ta\_ d3vbhc\_ glb35.1 glbev.1 dlhxs3\_ glev1.1 dlbev3\_  
gltmf.1 d1tmf1\_ dlb35a\_ d2mev3\_ gleah.1 glh8t.1 dleah1\_ d4q4w3\_  
dlr1a1\_ d1aym3\_ dlpvc1\_ dlzba1\_ dlh8tc\_ d1oopc\_ d1tme3\_ glqqp.1  
d4iv1c\_ gltme.1 d1r0ka3 dlj5pa3 dlvkoa2 d1vm6a2 d3qvsa2 dlgr0a2  
dlp1ja2 d2ovga\_ dlsg8a\_ dlrzsa\_ d3kz3a\_ d3orca\_ d3gpdg2 d2q49a2  
dlhdgo2 d2g17a2 d2cvoa2 d2czca1 d3pwka2 d1obfo2 d1i32a2 dlzyao2  
d2pkqo2 dlb7go2 d2hjsa2 d1cf2o2 dlvkna2 d1nvmb2 d2msya\_ d2djoa1  
d2r5za\_ dl f43a\_ d2lmda1 dlakhb\_ dl s7ea1 d3nara\_ dlzq3p1 d2craa1  
dlmija\_ d4uuta\_ d3a01a\_ dlx58a1 d3rkqa1 d3cmya1 d2cqxa1 d2da6a1  
dle3oc1 dl fjl a\_ dlmh3a1 dl ig7a\_ dl x41a1 dlwh7a1 dlgt0c1 d2mw8a\_  
dl1fup\_ dl x2ma1 dl b72a\_ dlwi3a1 dljgga\_ dlwjha1 dl x2na1 dlmnmc\_  
d2cuea1 d3k2aa\_ d2hosa\_ d2jwta2 dl pufa\_ dl octc1 d2hi3a\_ dl b8ia\_  
d4j19a\_ d3lnqa\_ dlwh5a1 dl b8ib\_ dl fexa\_ d2cqra1 dlug2a1 d2cqqa1  
d2ajea1 d4a69c\_ dlh8ac1 d2crga1 d2iw5b1 dlxc5a1 dl ofcx1 d2cu7a1  
dlwgxa1 d2cjja1 d2ckxa1 dlgvda\_ dlhcra\_ dltc3c\_ dlgdta1 dl u78a2  
dligna2 dl b10a1 dl b10a2 dl d5ya1 d3lv8a\_ dl s3ga1 dlzaka1 dl s4qa\_  
d3tvta2 dluf9a\_ dlkhta\_ dlckea\_ dl osna\_ dl p5zb\_ d4tmka\_ d3cm0a\_  
dltmka\_ dljaga\_ d3h86a\_ dl t0hb\_ dl nn5a\_ d2h92a\_ d3kb2a1 d2c95a1  
dl yj5a2 dlkgda\_ dlly1a\_ d2ak3a1 dlvyva2 dldeka\_ d2grja1 dl p3ja1  
dl y63a\_ dl e4ya1 dl s96a\_ d3iija1 dl lvga\_ dl nksa\_ dlvyua2 d4e22a\_  
dlqf9a\_ dljjva\_ dlq3ta\_ dlki9a\_ dl l7a2 dlteva\_ dlkjwa2 d2iyva2  
dlkaga\_ dlviaa\_ dl e6ca\_ dl g3ma\_ dl t8ta1 dl nsta\_ dl fmja\_ dlzrha\_  
dl l56a\_ d2a3ra\_ dl aqua\_ d2zptx\_ d3ckla\_ dl teta\_ dlq44a\_ d2gwha\_  
dlodfa\_ dluj2a\_ d4gi7a\_ d2jeoa1 dl rz3a\_ dl z0ja1 d3umra2 d3gj0a1  
d2gaoa1 dl yzga1 dl x3sa1 dl g7sa4 dlpuja\_ dludxa2 dlkk1a3 d2o52a\_  
dljwyb\_ dlzcaa2 dlzcba2 d2fv8a1 d2cjwa\_ d3dz8a1 dl xzpa2 dlvg8a\_  
d4qxaa\_ d2ew1a1 dl x1ra1 d2bcgy\_ d3doea1 d3cona\_ d3rega\_ d3wyga\_  
dlupta\_ d2b6ha1 dlzd9a1 dl r5ba3 dl n0ua2 dl r2qa\_ d2f91a1 d2rhda\_  
d3q3jb\_ d3q85a\_ dl efma1 dl r8qa\_ d2gf9a1 d2akab1 dl ek0a\_ dl z08a1  
d2gcoa1 d2dyla2 d4g01b\_ d2cxxa1 dlsvia\_ d3q72a\_ dl ni3a1 d4ac9a4  
d2erxa1 d2bmea\_ dlwxqa1 d2gf0a1 d4ldja1 dl zunb3 dl d5ca\_ d4lv5b\_  
dl efca3 dl kmqa\_ d2g6ba1 d3lrpa\_ dl tada2 d2y8ea\_ d4rd4a1 dl z06a1  
d2heia\_ d3a58b\_ dl u01a2 dl d2ea3 dl zj6a1 d2ocba\_ d3rwoa\_ dlmr3f\_  
d2e9sa1 d4u5xa1 d2iwra\_ d2fn4a1 d3bwdd\_ d2nzja1 d2atva1 d2ksqa\_  
d3l43a\_ dlmkya2 dlmkya1 dlwmsa\_ dljnaya3 d2rmka\_ dl f6ba\_ dl f60a3  
dlgota2 dljala1 d2fh5b1 dl g16a\_ d2wblc\_ dl m7ba\_ dl wf3a1 dl f5na2  
dl t9ha2 dl z6xa1 dl z0aa1 d2fg5a1 d2a5ja1 d2bcjq2 dl s0ua3 dl ky3a\_  
d4y0va\_ d4lhwa\_ d2qmea1 d2atxa1 dl egaal dl ryha\_ dl moza\_ dl nrjb\_  
d2erya1 d3bfka\_ dlpuia\_ dl fzqa\_ d3j3az1 d3t5ga\_ dl shza2 d3defa\_  
d2f7sa1 d3raba\_ d3tsoa\_ d3aq4a\_ d2a17a1 d3sfva1 d3bc1a\_ d2ncda\_  
dl sdma\_ d3h4sa1 d2heha\_ d2grya\_ g3kin.1 dlkk8a2 dlbr2a2 dlgoja\_  
dl f9va\_ d2mysa2 dl l kxa\_ d3t0qa\_ d4db1a1 d3gbja\_ dl ry6a\_ dl v8ka\_  
dl k8ka2 dl k8ka1 d3uleb1 d3i33a2 d3i33a1 dl bupa1 dl dkgd2 dl dkgd1  
d4ci6a2 dljcfal d4a2ba2 d2fxua1 dl yaga2 dl yaga1 d4cbua2 dl bupa2

d1g99a2 d2e1za2 d2e1za1 d1saza1 d1saza2 d1iqca2 d1iqca1 d1eb7a1  
d1nmla2 d1nmla1 d3h1jd1 d1hroa\_ d4gedb\_ d3zooa\_ d1mz4a\_ d1gu2a\_  
d1f1fa\_ d1dvva\_ d1c6ra\_ d1c75a\_ d1e29a\_ d1gdva\_ d1cnoa\_ d1h32b\_  
d1co6a\_ d2bh4x\_ d2aiua\_ d5cytr\_ d1jdl\_ d1i8oa\_ d2zboa\_ d3dmia\_  
d1ls9a\_ d1wvec\_ d2yk3a\_ d3ph2b\_ d1dw0a\_ d5aura\_ d1ql3a\_ d1qn2a\_  
d1f1ca\_ d2nqya\_ d1h4ga\_ d1hixa\_ d1oa2a\_ d1olra\_ d3b7ma\_ d4h7ma1  
d3wp3a\_ d2vgda\_ d1lgoa\_ d3zsea\_ d2nlra\_ d3wx5a\_ d1oa3a\_ d1pvxa\_  
d1m4wa\_ d1f5ja\_ d1oa4a\_ d1ks5a\_ d4ix1a1 d1g66a\_ d5ajha1 d1evsa\_  
d1cnt1\_ d1pvhb\_ d1z7ca\_ d1huwa\_ d1bgea\_ d1rhga\_ d1f6fa\_ d1f45b\_  
d1i1rb\_ d1axia\_ d1etea\_ d3tgxb\_ d1scfa\_ d2z3qa1 d3qb1a\_ d1hula\_  
d1m48a\_ d4nkqb\_ d1eera\_ d1v7mv\_ d5e4ea\_ d2o27a\_ d3b5ka\_ d2psma1  
d4zf7a\_ d3uf5a\_ d4x51a\_ d4ypgc1 d3oq3a\_ d1lqsl\_ d1n1fa\_ d1aula\_  
d1wu3i\_ d3bes1\_ d3ux9a\_ d1v8fa\_ d2ejca\_ d3muea1 d1ihoa\_ d3q12a1  
d4dnxa2 d1m8pa2 d1g8fa2 d1jhda2 d1x6va2 d3rbaa\_ d2qtra\_ d1nupa\_  
d3l92a\_ d1f9aa\_ d1qjca\_ d2h29a\_ d1vlha\_ d1od6a\_ d1lw7a1 d1mrza2  
d4ruka\_ d2e17a\_ d1iq0a2 d1irxa2 d1r6ta2 d1ivsa4 d2cyba\_ d1rqga2  
d1j09a2 d2yxna\_ d1f7ua2 d1h3fa1 d1ffya3 d2g36a1 d1jila\_ d1n3la\_  
d1i6la\_ d1pfva2 d1h3na3 d3n9ia\_ d3sz3a1 d3sw2a\_ d1moxc\_ d1dx5i3  
d1edmb\_ d1aut12 d1aut11 d1nqlb\_ d1dval1 d1szba2 d1kigl\_ d2y5fl\_  
d1ijqa2 d1gk5a\_ d1g1sa2 d1nt0a3 d1xdtr\_ d1lmja2 d1lmja1 d1nzia2  
d2wphe\_ d1klil\_ d1pfx12 d1pfx11 d1p9ja\_ d1glta2 d1f7ea\_ d4yzub\_  
d2mgpa1 d1b9wa1 d1b9wa2 d2mgpa2 d1ob1c2 d1n1ia2 d1n1ia1 d2npra2  
d2npra1 d1m1xb5 d1qx2a\_ d2y5ia\_ d1psra\_ d3n22a\_ d2egda\_ d4ggfc\_  
d2wcea\_ d2luca\_ d4aqia\_ d3nsia\_ d2lp3a\_ d1j55a\_ d1a4pa\_ d1k8ua\_  
d1nsha\_ d1pvaa\_ d3fs7a\_ d2pvba\_ d1ttxa\_ d1rwya\_ d2kyfa\_ d1rk9a\_  
d1a75a\_ d1exra\_ d1tiza1 d1nyaa\_ d1g8ia\_ d1ggwa\_ d1wdcc\_ d3fwba\_  
d1ggza\_ d2o5ga\_ d1ctaa\_ d3i5gc\_ d1sl8a\_ d1fpwa\_ d2scpa\_ d2roaa\_  
d4aqra\_ d3pn7b\_ d1br1b\_ d2mysb\_ d1s6ca\_ d1bjfa\_ d2obha\_ d1jfka\_  
d1jf0a\_ d1qv0a\_ d1lkja\_ d2mlfc\_ d2m97a\_ d2d8na\_ d4by5a\_ d1jbaa\_  
d4nqga\_ d1wdcb\_ d2mysc\_ d1j7qa\_ d1s6ia\_ d1uhka2 d1r2ua\_ d1dtla\_  
d3kf9a\_ d3pn7c\_ d1qjta\_ d1fi6a\_ d1gjya\_ d1y1xa\_ d1hqva\_ d1dvia\_  
d1df0a1 d1qxp2a\_ d4usla\_ d1k94a\_ d1wkya2 d1uuqa\_ d3wh9a\_ d4mlra\_  
d1xyza\_ d4xuya\_ d2je8a5 d4bf7a1 d3cuia\_ d1ur4a\_ d1odza\_ d2vzsa5  
d1bqca\_ d2x2ya1 d1hjqa\_ d1qnra\_ d4y7ea1 d1vjza\_ d4k68a\_ d2v3ga\_  
d4hpga\_ d1nofa2 d1nq6a\_ d1h4pa\_ d1aq0a\_ d3ziza\_ d4bs0a\_ d1ecea\_  
d1h1na\_ d1ta3b\_ d1w91a2 d1ilwa\_ d1uhva2 d1us3a2 d1legza\_ d7a3ha\_  
d1tvna1 d3nyda1 d1ghsa\_ d2cyga1 d4xv0a\_ d2c8na2 d1w32a\_ d3emca\_  
d1v6ya1 d1foba\_ d2uwfa1 d2fgla\_ d3niya1 d2c0ha1 d1rh9a1 d1yq2a5  
d1szna2 d1fa2a\_ d1pama4 d5do8a1 d1ea9c3 d1hx0a2 d2fhfa5 d1qhoa4  
d1avaa2 d1m53a2 d4m8ua1 d2gjpa2 d1lwha2 d4howa1 d1ktba2 d1j0ha3  
d3vm5a1 d2x1ia\_ d1wzaa2 d1uasa2 d2diea1 d1mxga2 d1ht6a2 d1leswa\_  
d5cpsa\_ d1ud2a2 d1zjaa1 d3gbea1 d1kwga2 d1wdpa\_ d1gcya2 d1g5aa2  
d1hvxa2 d3dhpa2 d2bhua3 d4do4a1 d3qgva1 d1e43a2 d1g94a2 d2d3na2  
d1gjwa2 d1gvia3 d1x1na1 d1r7aa2 d1tz7a1 d4c7ga2 d2gjxa1 d1jaka1

d1yhta1 d4toqa\_ d1wb0a1 d1w9pa1 d1eoka\_ d1itxa1 d1kfwa1 d1goia2  
d2gsja\_ d1hjxa1 d1jnda1 d1vf8a1 d3wdpp1 d3wq5a\_ d1gnxa\_ d4gxpa\_  
d4hz8a\_ d1e4mm\_ d3aiua\_ d1wcga1 d1qvba\_ d3ahxa\_ d1v02a\_ d2dga\_  
d1pbga\_ d1vffa1 d1qoxa\_ d4ha4a\_ d1mixa2 d1e5wa2 d1isna2 d2a16b2  
d3syxa1 d1mkea1 d2p8va\_ d1xoda1 d1i7aa\_ d1evha\_ d1qc6a\_ d1egxa\_  
d1x14a1 d1n9pa\_ d3vsqa\_ d2gixa1 d2v76a\_ d1wj1a1 d1aqca\_ d1qqga2  
d1qqga1 d1n3ha\_ d4dbba\_ d3f0wa1 d1p3ra\_ d1wgua1 d2cy4a1 d3hqca\_  
d1wvha1 d1xr0b1 d3nvva1 d1krha3 d2h88b1 d1n62a2 d1t3qa2 d1kf6b2  
d1zoyb1 d1ffva2 d1dgja2 d1rm6c2 d1h6ua1 d9ldta1 d2ewda3 d1up7a1  
d2dfda1 d1s6ya1 d1vjta1 d7mdha1 d1hyea1 d1t2da1 d1ojsa3 d1b8pa1  
d1ldna1 d1hyha1 d1civa1 d2a92a1 d1ez4a1 d1i0za1 d1y6ja1 d1gv0a1  
d1ur5a1 d1ll1da1 d1v8ba1 d1gdha1 d1l7da1 d2dlda1 d1mx3a1 d1ygya1  
d1qp8a1 d1j4aa1 d2naca1 d1npya1 d3t4ea2 d1a4ia1 d1o0sa1 d2hk9a2  
d2egga2 d1b26a1 d1bvua1 d1gq2a1 d1c1da1 d1leha1 d1gtma1 d1euza1  
d3dona2 d1edza1 d1gpja2 d1vi2a1 d1p77a1 d1nyta1 d1b0aa1 d1vl6a1  
d1v9la1 d1txga2 d3f47a1 d1mv8a2 d2pv7a2 d1xc2a3 d2ahra2 d4xiya1  
d2f1ka2 d1pgja2 d1i36a2 d1np3a2 d1lj8a4 d1teaa3 d1qmg2 d2i76a2  
d2g5ca2 d1wdka3 d1dlja2 d3cuma3 d1kola2 d1f8fa2 d1qora2 d1jqba2  
d1vj0a2 d1cdoa2 d1gu7a2 d1d1ta2 d1xa0a2 d2dm6a2 d1jvba2 d1rjwa2  
d1llua2 d1h2ba2 d1tt7a2 d1piwa2 d1o89a2 d1iz0a2 d1e3ja2 d1yb5a2  
d1uufa2 d1e3ia2 d3gpdg1 d1vc2a1 d2nvw1 d1u8fo1 d1ydw1 d1hdgo1  
d2g17a1 d1cf2o1 d2czca2 d1r0ka2 d1obfo1 d2cvoa1 d1ebfa1 d1h6da1  
d1i32a1 d1zh8a1 d2q49a1 d1qkia1 d3pzra1 d1xeea1 d1vkoa1 d1vm6a3  
d3qvsa1 d2pkqo1 d1b7go1 d1gr0a1 d1p1ja1 d1lc0a1 d1j0xo1 d3pwka1  
d2hjsa1 d1zyao1 d1vkna1 d1tlt1a1 d1nvmb1 d3sjua\_ d3ojfa1 d1xu9a1  
d2jjya1 d1n7ha\_ d1y1pa1 d1h5qa\_ d1jtva\_ d4fs3a\_ d2bkaa1 d1gy8a\_  
d2c5aa1 d1ulsa\_ d1ooea\_ d2b69a1 d1y5ma1 d1spxa\_ d1aela\_ d1bxka\_  
d1ydea1 d1gega\_ d1hdoa\_ d1o5ia\_ d1e6ua\_ d1snya1 d2rhca\_ d3zv4a\_  
d5ceja\_ d2d1ya1 d1fjha\_ d3w8ea\_ d2fmua1 d1x1ta\_ d1rpna\_ d3ay7a1  
d1k2wa\_ d1eq2a\_ d2hrba1 d3ruaa\_ d2ew8a1 d4hwka\_ d1xgka\_ d2bd0a1  
d1yo6a1 d2a35a1 d2ntva\_ d1vl8a\_ d1hdca\_ d4bkua\_ d2ag5a1 d2q45a\_  
d1nffa\_ d4iy1a\_ d1zbqa1 d1kewa\_ d1ek6a\_ d1ja9a\_ d2q46a2 d1iy8a\_  
d1cyda\_ d2ptga\_ d1hxha\_ d1uzma1 d3lyla\_ d4m89a\_ d3wyea\_ d2blla1  
d1w6ua\_ d1sb8a\_ d2q2va\_ d4nr0a\_ d1e6wa\_ d2gasa\_ d3oiga1 d2bgka1  
d1mxha\_ d1vl0a1 d1rkxa\_ d1r6da\_ d1wmaa1 d1e7wa\_ d2c07a1 d1xkqa\_  
d3tzha\_ d1g0oa\_ d3lz6a\_ d1qyca\_ d1ledoa\_ d1gz6a\_ d1oc2a\_ d1t2aa\_  
d1zema1 d2xoxa\_ d1z45a2 d1geea\_ d3lt0a\_ d4e6pa\_ d2wyua\_ d1db3a\_  
d4q9na\_ d1xhla\_ d4o1ma\_ d1fmca\_ d2uvda\_ d2gdza1 d1uaya\_ d2z1ma\_  
d2o23a2 d2fr1a2 d2fr1a1 d1qsga\_ d1qyda\_ d4zjua\_ d2a4ka1 d1yb1a\_  
d1wvga1 d1yxma1 d3f4ba\_ d1mg5a\_ d1xg5a1 d1r55a1 d3gboa\_ d1atla\_  
d1kufa\_ d4q1la\_ d1quaa\_ d1yp1a\_ d1wnia\_ d3nqyb\_ d4gera\_ d1mdwa\_  
d1ziva1 d1zcma1 d3ioqa\_ d1fh0a\_ d1o0ea\_ d1khqa\_ d1m6da\_ d2cb5a\_  
d1cs8a\_ g8pch.1 d1s4va\_ d2pnsa\_ d1vsna1 d1mira\_ d1iwda\_ d2oula\_  
d7pcka\_ d3bwka\_ d3bcna\_ d2p86a\_ d1pvja\_ d1pcia\_ d1gece\_ d1deua\_

d4bs6a\_ d1xkga1 d1cqda\_ d1jqpa2 d2c0ya\_ d2bdza\_ d3p5ua\_ d2o36a\_  
d1k9xa\_ d1ex4a2 d1c6va\_ d2jk6a2 d2jk6a1 d1feca1 d1feca2 d1lpfa1  
d1lpfa2 d1xhca1 d1xhca2 d1dx1a2 d1dx1a1 d1gera2 d1m6ia2 d1onfa1  
d1onfa2 d3lada2 d3lada1 d1w4xa1 d1w4xa2 d1gesa2 d1mo9a1 d1xdia1  
d1fl2a2 d1fl2a1 d1fcda1 d1fcda2 d1h6va2 d1h6va1 d1mo9a2 d1gv4a2  
d1gv4a1 d2gv8a2 d2gv8a1 d1aoga1 d1aoga2 d1hyua1 d1ebda1 d1ebda2  
d3dk9a1 d1q1ra2 d1q1ra1 d1gesa1 d1zbf1a1 d2z1ha\_ d2etja1 d3qioa1  
d1j11a\_ d2e41a\_ d21sna1 d1io2a\_ d1uaxa\_ d2yv0x\_ d1mu2a1 d1lekea\_  
d1i39a\_ d1pn0a1 d1reoal d1ju2a1 d2f5va1 d3c96a1 d2gmha1 d1gpea1  
d1o5wa1 d1n4wa1 d1k0ia1 d2dw4a2 d2ivda1 d1seza1 d2voua1 d1kdga1  
d1s5ja1 d2hbja2 d2igia\_ d1wlja\_ d1qhta1 d4dlea1 d1tgoa1 d2f96a1  
d3tr8a1 d3mxma\_ d1q8ia1 d1y97a1 d1w0ha\_ d1kfsa1 d2py5a1 d1noya\_  
d1d5aa1 d1yt3a3 d2guia\_ d3mwpal d4kb1a\_ d1js9c\_ d1f15b\_ d1za7a\_  
d11aja\_ d2csua1 d3q9ub\_ d2yv1a1 d3q9na\_ d2d59a\_ d1oi7a1 d2yv2a1  
d1euca1 d1y81a1 d4iuaa3 d4bvva\_ d5hpga\_ d3k65a\_ d1ki0a3 d1ki0a2  
d1ki0a1 d1a0ha1 d1pmla\_ d3sp8a3 d2feba1 d1wgqa1 d1v89a1 d2coda1  
d1zc3b\_ d1wg7a1 d1u5ea1 d1v61a1 d2coca1 d2ys1a1 d1v5pa1 d1ntya2  
d1wjma1 d1wila1 d1u29a\_ d1xx0a1 d1unqa\_ d2zkmx3 d1fhoa\_ d1v88a1  
d2adza1 d1x1fa1 d1p6sa\_ d2coaa1 d1btka\_ d1v5ma1 d1faoa\_ d2x18a\_  
d1dyna\_ d1x1ga1 d4kaxb\_ d2j59m1 d1xcga2 d1txda2 d1u5da1 d1dbha2  
d1wlha\_ d1upqa\_ d1v5ua1 d1foea2 d2fj1a1 d1eaza\_ d2dfka2 d2cofa1  
d1kz7a2 d1r7ha\_ d1faaa\_ d1wika1 d1xfla\_ d1ttza1 d2f51a1 d1ti3a\_  
d1nhoa\_ d1sena\_ d2i4aa\_ d1ep7a\_ d1zmaa1 d1fo5a\_ d3lefa1 d3diea1  
d2yana1 d1z6na1 d1oaza\_ d3zywa1 d4aj8a\_ d1nm3a1 d4fiwa\_ d1wmja\_  
d4hs1a1 d1liloa\_ d1xwaa1 d1wjka1 d2vmla\_ d1fb6a\_ d1gh2a\_ d1h75a\_  
d1nw2a\_ d1kx5b\_ d3a6na\_ d4m6ba2 d2nqbd\_ d3wkjd\_ d2yfwe\_ d4h9na\_  
d5bnxa\_ d1kx5c\_ d3r45a\_ d1eqzb\_ d4jjnb\_ d1f66c\_ d1eqza\_ d4wnnb\_  
d1kx5a\_ d1u35c1 d1id3a\_ d2nqbc\_ d1kx5d\_ d3us3a3 d3us3a1 d1um8a\_  
d1ixza\_ d1qvra2 d1qvra3 d1qzma\_ d1sxjc2 d1jr3d2 d2p65a\_ d1l8qa2  
d1g8pa\_ d3hu3a3 d1sxjd2 d1njfa\_ d1in4a2 d1sxja2 d1tuea1 d2ce7a2  
d1w5sa2 d1sxjb2 d1d2na\_ d1ny5a2 d1ofha\_ d2gnoa2 d2a5yb3 d1fnna2  
d1u0ja1 d1lv7a\_ d1iqpa2 d2fnaa2 d1ixsb2 d4gita\_ d1sxje2 d1g41a\_  
d1pd212 d1nhya2 d2a2ra2 d1k0dd2 d1f2ea2 d1gsua2 d1f3ba2 d2fhea2  
d2pvqa1 d1tw9a2 d1oyja2 d1e6ba2 d1k0ma2 d3ik7a1 d4is0a1 d1r5aa2  
d1jlva2 d1m0ua2 d3gtub2 d1z9ha2 d1okta2 d1axda2 d2gsra2 d1tu7a2  
d1k3ya2 d1zgamma1 d1b48a2 d1gnwa2 d1gwca2 d2gsta2 d1glqa2 d1oe8a2  
d1pn9a2 d1v2aa2 d1fw1a2 d1duga2 d3vrda1 d3vrda2 d1fcdc2 d1fcdc1  
d1h1oa2 d1h1oa1 d1m70a2 d3zxha\_ d1cgla\_ d1rm8a\_ d1leaka2 d1hy7a\_  
d2jsda\_ d1cxva\_ d1hv5a\_ d1i76a\_ d1lig8a1 d1czan2 d1czan3 d1czan1  
d1lig8a2 d1czan4 d1bg3a4 d1bg3a3 d1bg3a1 d1m32a\_ d1libja\_ d1c7na\_  
d1iuga\_ d4q75a\_ d2bkwa1 d1t3ia\_ d1n8pa\_ d1qz9a\_ d1jf9a\_ d1leg5a\_  
d1p3wa\_ d3kgwa\_ d1c11a\_ d2ctza1 d1vjoa\_ d2rfva\_ d1gc0a\_ d1cs1a\_  
d1d2fa\_ d2ch1a1 d1qgna\_ d1pffa\_ d1elua\_ d3wyha\_ d4g9sa1 d3gxra\_  
d1qqya\_ d1f6ra\_ d1ivma\_ d2gv0a\_ d1iiza\_ d2z2fa\_ d1j8xa\_ d1ghla\_

d1b9oa\_ d1741a\_ d1691a\_ d2o4wa\_ d1p37a\_ d1k28a3 d1xjta1 d1jtma\_  
d2f2qa\_ d4e97a1 d1g4ma1 d3w3ea\_ d4tx7a\_ d3cqla\_ d4msta\_ d3iwra\_  
d1dxja\_ d2z37a\_ d4dyga\_ d2pjsa1 d1k11a\_ d2i7ra1 d1ecea\_ d1xqaa1  
d5cj3a1 d1npba\_ d1jifa\_ d2p7oa\_ d1r9ca\_ d1nkia\_ d1mpya2 d1kw3b2  
d1kw3b1 d4ghga1 d1tfza1 d3isqa1 d3isqa2 d1sqia1 d1sqia2 d1lkda2  
d1lkda1 d1mpya1 d1cjxa2 d1sp9b2 d1t47a1 d1t47a2 d1flua2 d1sp8a1  
d1sp8a2 d1flua1 d1etob\_ d1umqa\_ d1g2ha\_ d1ro5a1 d1w5qa\_ d2c1ha\_  
d1ohla\_ d1l6sa\_ d1qsta\_ d2beia1 d4m3sa\_ d1u6ma1 d1ygha\_ d1yk3a1  
d3dr6a\_ d1xmta\_ d1z4ea1 d2ge3a1 d1bo4a\_ d2fiaa1 d2jdca1 d1y9wa1  
d3to7a\_ d1wwza1 d2fl4a1 d2ozua1 d2b5ga\_ d2cy2a1 d2p0wa\_ d4pswa\_  
d1yrea1 d1yr0a1 d1m4ia\_ d2gana1 d1yvka1 d1ghea\_ d2g3aa1 d1y7ra1  
d2euia1 d1q2ya\_ d2fsra1 d1xeba\_ d2ae6a1 d1cjwa\_ d1qsm\_ d2aj6a1  
d1y9ka1 d1i12a\_ d1vkca\_ d2atra1 d1n71a\_ d2d4pa1 d2fiwa1 d2fe7a1  
d1tiqa1 d2ou2a\_ d1yx0a1 d2fcka1 d1p0ha\_ d2j8ma\_ d2pq8a\_ d1z4ra1  
d1s3za1 d1ufha\_ d1xvqa1 d1pn0a2 d3hy2a\_ d2cvba1 d1o8xa\_ d1lu4a\_  
d1we0a1 d2bmxal d2a4va1 d1psqa\_ d1xiya1 d1q98a\_ d1n8ja\_ d1zofa1  
d2ggta\_ d3tjja\_ d4jela1 d1o73a\_ d3s9fa\_ d2zcta\_ d1qmva\_ d1jfua\_  
d2b1ka\_ d5dvba1 d2b5xa1 d2v2ga\_ d1st9a\_ d3tb2a\_ d4llra\_ d4fh8a1  
d1e2ya\_ d1knga\_ d2h30a\_ d1i5ga\_ d2z9sa\_ d2f8aa1 d1tp9a1 d2b7ka\_  
d1nm3a2 d3hvva\_ d2wfc\_ d4kcea\_ d1xvwa1 d4gqca1 d3qpma\_ d4k1fa\_  
d1zzoa1 d1gp1a\_ d1prxa\_ d2m5ta\_ d1cqqa\_ d1wqsa\_ d5bpea\_ d2ipha\_  
d1lvoa\_ d2bhga1 d3tnta\_ d3sjia\_ d3d23a1 d2fyqa\_ d3tloa\_ d3zvea1  
d2hrva\_ d3q3ya1 d4asha1 d1e88a1 d1l6ja5 d1l6ja4 d1leaka4 d1leaka3  
d1l6ja3 d1h8pa2 d1h8pa1 d1etha2 d1w52x1 d2ppla1 d1lpbb2 d2oxea1  
d1bu8a2 d1rpla2 d1ys1x\_ d4hs9a\_ d1ex9a\_ d1ku0a\_ d3qmma\_ d1lgya\_  
d4l3wa\_ d1gz7a\_ d1lukca\_ d2ftba\_ d1pmpa\_ d2rcqa1 d1fdqa\_ d4lkpa\_  
d1sa8a\_ d1vyfa\_ d3vg7a1 d4azqa1 d1o8va\_ d5bvqa\_ d1p6pa\_ d2qo4a\_  
d1opba\_ d1yiva1 d1o1va\_ d4bvma1 d4tkba\_ d4i3ba\_ d1bwya\_ d1ftpa\_  
d1ggla\_ d4gkca\_ d1cbia\_ d3p6da1 d1kqwa\_ d2a0aa1 d1xwdc1 d3kj4a\_  
d1w8aa\_ d2ifga3 d1p9ag\_ d1xkua\_ d3p0ya1 d1igra1 d1igra2 d1n8yc2  
d1n8yc1 d1m6ba2 d1m4la\_ d2bk7a\_ d3fjua\_ d1z5ra1 d1kwma1 d1uwya2  
d1jqga1 d2c1ca1 d1dtda\_ d1h8la2 d1i26a\_ d1cixa\_ d1y29a\_ d1v7fa\_  
d2jtba\_ d1d1ha\_ d1g9pa\_ d1llupa\_ d1qk7a\_ d1mb6a\_ d2a2va\_ d1niya\_  
d1i25a\_ d2mpqa\_ d1ie6a\_ d1kqha\_ d1la4a\_ d2mxoa1 d1d10a\_ d1koza\_  
d1qk6a\_ d1emxa\_ d1lqra\_ d1c6wa\_ d1rmka\_ d1ixta\_ d1eyoa\_ d1fu3a\_  
d1g1pa\_ d1f3ka\_ d1fyga\_ d1rypd\_ d1irua\_ d1rypc\_ d3unfk\_ d1rypa\_  
d1j2pa\_ d1irui\_ d1j2qh\_ d3unfh\_ d1m4ya\_ d1rypb\_ d1irul\_ d1lirug\_  
d1liru2\_ d1q5rh\_ d1rypg\_ d1g3ka\_ d1liruf\_ d1q5qa\_ d1e94a\_ d1lirub\_  
d1ryph\_ d3ty6a\_ d1liruj\_ d1liruk\_ d1rype\_ d1lirud\_ d1lirue\_ d3mi01\_  
d1rypf\_ d1liruh\_ d2z3ba\_ d1liruc\_ d3mka2\_ d1liru1\_ d1ny721 d1a6ca3  
d1a6ca2 d1a6ca1 d1pgl22 d1pgl21 d1pgl11 d1ny711 d1ofda3 d1ea0a3  
d1ecfa2 d1q15a2 d1ct9a2 d1ao0a2 d1te5a\_ d3ubub\_ d1egia\_ d1qo3c\_  
d1v7pa\_ d1tdqb\_ d3ubua\_ d1c3ab\_ d1h8ua\_ d3bx4b\_ d1t8ca1 d1sb2a1  
d1qdda\_ d2ziba1 d3cada\_ d1byfa\_ d1j34b\_ d1jwia\_ d1jzna\_ d1c3aa\_

d1wmza\_ d3bdwb\_ d1hq8a\_ d1fifa1 d1dv8a\_ d3hupa\_ d1wk1a1 d1umra\_  
d2afpa\_ d3bx4a\_ d1gz2a\_ d1sl6a\_ d1v7pb\_ d3g8ka\_ dlixxa\_ d1j34a\_  
d1jwib\_ d1g1sa1 d1y17a1 d1ja3a\_ d1fvub\_ d3bdwa\_ d1sb2b1 d1fvua\_  
d1umrc\_ d1oz7a\_ d4m17a\_ d3cfwa1 d1ypqa1 d1g1ta1 d3fd4a\_ d3l9jc\_  
d4dn8a1 d1v4lb\_ d1rd1l\_ d2msba\_ d4w9ta\_ d1jvna1 d4x2ra1 d1ka9f\_  
d4axka1 d1thfd\_ d1h5ya\_ d4u28a\_ d2y88a\_ d4wd0a\_ d1vzwa1 dlix2a\_  
d4lt9a1 d3tc7a1 d3hoja\_ d1i4na\_ d3vnda\_ d3nl8a1 d1geqa\_ d3naval  
d1v5xa\_ d4a2ra1 d3tc6a1 d1ujpa\_ d4ijba\_ d1xcfa\_ d1vc4a\_ d1rd5a\_  
d1qopa\_ d3b5va\_ d1jx4a2 d3gv5b1 d1t94a2 d3bq0a2 d1kyqa1 g1gxs.1  
g1wht.1 d1azwa\_ d1mtza\_ d2xqfa\_ d1f6wa\_ d1dx4a\_ d1qe3a\_ d1k4ya\_  
d4qwwa\_ d2ha2a\_ d3c8da2 d2pbla1 d1jkma\_ d1jjia\_ d1lzlal d1gl9b1  
d1gkub2 d2qvba\_ d2v9za\_ d4kafa1 d1jmx4 d1jmx3 d1pbya4 d1b9ra\_  
dloffa\_ d1frra\_ d3wcqa\_ d1e9ma\_ d1wria\_ d1i7ha\_ d3av8a\_ d1czpa\_  
d1rfka\_ d3p1ma1 d3b2ga\_ d2bt6a2 d1xm5a\_ d1xaxa\_ d1tvia\_ d1s5ja2  
d1qhta2 d4dlea2 d1tgoa2 d3py8a2 d1kfsa2 d2py5a2 d1d5aa2 d1xova2  
d1f74a\_ d3l21a\_ d2e1da\_ d1to3a1 d1w3ia\_ d1sfla\_ d1n7ka\_ d1vcva1  
d4imea\_ d1wa3a\_ d2ocza1 d1f2ja\_ d3m16a\_ d2yxga\_ d1ub3a\_ d3a5fa\_  
d1fbaa\_ d1l6wa\_ d1xfba1 d1wx0a1 d1vpxa1 d1mxsa\_ d2a4aa1 d1xkya1  
d3cq0a1 d3s1xa\_ d1f05a\_ d1fdja\_ d3cpa1 d4d2ja\_ d1yloa2 d1y7ea2  
d1y0ya3 d1lfwa1 d1vixa1 d1fnoa4 d1vhoo2 d1ysja1 d1vhea2 d1z21a1  
d2fvga2 d1vgya1 d1r3na1 d2grea2 d1xmba1 g1q7l.1 d1rtqa\_ d3rp2a\_  
g1lucy.1 d1fuja\_ d2zchp\_ d3w94a\_ d1si5h\_ d1lo6a\_ g2pka.1 d1cgha\_  
d1kigh\_ d1a5ia\_ d3s9ba\_ d1hj8a\_ d1ao5a\_ d2anya\_ d1q3xa1 d1gvza\_  
d1azza\_ d4gsoa\_ d2f91a1 d1iaua\_ d1gdna\_ d1eufa\_ g1fiw.1 d1eq9a\_  
d4nfea\_ d2rdla\_ d1spja\_ d1elva1 d1a7sa\_ d1ekbb\_ d1pfxc\_ d1yc0a\_  
d2aiqa\_ g1fiz.1 d1fi8a\_ d4k60a\_ d4dgja\_ d1mzaa\_ d1op0a\_ d3tjva\_  
d1pytd\_ d1sgfg\_ g1gg6.1 d2eeka\_ g1rtf.1 d1a0ja\_ d3g01a\_ d1pytc\_  
d4e7na\_ d1ddja\_ d1z8ga1 d2hlca\_ d1npma\_ d1brup\_ g1jou.1 d1sgfa\_  
d1autc\_ g2hnt.1 g1kdq.1 d1orfa\_ d3s69a\_ d4crga\_ d1fxya\_ d1bqya\_  
d1svpa\_ d1mbma\_ d3su6a1 d1cula1 d4agka\_ d1vcpa\_ d1q31a\_ d3e90b\_  
d1ep5a\_ d3u1jb\_ d1dzka\_ d4tlja\_ d2a2ua\_ d4wfva\_ d3t1da\_ d4iixa\_  
d3zq3a\_ d2nnda\_ d1i4ua\_ d1kxoal d1bbpa\_ d1kt7a\_ d1exsa\_ d3s26a1  
d1lf7a\_ d1qfta\_ d4gh7a\_ d1z24a1 d1qabe\_ d1xkia\_ d1lew3a\_ d3bx7a\_  
d4iawa1 d1n0sa\_ d1gkab\_ d3kzaa\_ d2k23a\_ d2l9ca1 d2joza1 d1gm6a\_  
d3kffa\_ d3saoa1 d1e5pa\_ d1yupa1 d1iiua\_ d3lgia\_ d3i77a\_ d2z9ia2  
d4nsva\_ d1lcya2 d4jcna\_ d1agja\_ d1os8a\_ d1hpga\_ d1p3ca\_ d1l1ja\_  
d1e69a\_ d1mv5a\_ d3g60a4 g1ii8.1 d1ewqa2 d1ji0a\_ d1qhla\_ d1v43a3  
d2wmfa1 d1vpla\_ d4a82a2 g1f2t.1 d2d62a1 d3tuic1 d2bbsa1 d3g60a3  
d2ixea\_ d1g6ha\_ d1sgwa1 d2qi9c\_ d3rlfa1 d3b60a1 d3d31a2 d2pzea1  
g1xew.1 d1jj7a\_ d1oxk2 d2onka1 d1wlwa\_ d1iwea\_ d1qf5a\_ d1vmaa2  
d1nija1 d1np6a\_ d2p67a1 d3ihla\_ d1okkd2 d1ls1a2 d1s1ma2 d1iona\_  
d2v40a\_ d1dj3a\_ d3hida\_ d2vo1a1 d2g0ta1 d1vcoa2 d1j8mf2 d1g3qa\_  
d1xjca\_ d1p9ba\_ d1qzxa3 d1ihua2 d1ihua1 d2qm8a\_ d1dj2a\_ d4ioja\_  
d1cp2a\_ d1yrba2 d1hyqa\_ d3gqba2 d1skye3 d1xp8a1 d1tf7a2 d1tf7a1

d1ye8a1 d1skyb3 d2qe7d2 d4blta\_ d4huta\_ d3ldaa2 d4hyya\_ d2i3ba1  
d1crla\_ d3j9tb2 d3ntua2 d1vdza1 d2z43a\_ d1e9ra\_ d1nlfa\_ d3ziaa2  
d1n0wa\_ d1g6oa\_ d3ziad2 d3j9ta2 d1pzna2 d3gqbb2 d2i49a\_ d1nnfa\_  
d1xvxa\_ d1ursa\_ d1h3da1 d1iuda\_ d4mlva1 d1twya\_ d3e13x\_ d2nxoa1  
d4pfua\_ d3ttma\_ d1elja\_ d2qmwa1 d1us5a\_ d1y3na1 d1jeta\_ d1uqwa\_  
d4f19a1 d2esna2 d3thia\_ d3fasa1 d2uyeb\_ d2xwva1 d1r9la\_ d2fyia1  
d1pb7a\_ d2ozza1 d1sw5a\_ d1nh8a1 d1vr5a1 d2g29a\_ d1xs5a\_ d3lswa\_  
d2z23a\_ d3w9va\_ d3tcha\_ d1q35a\_ d1z7me1 d3q27a\_ d1p99a\_ d1ve4a1  
d2i6ea1 d4mcoa1 d4n8ya\_ d1eu8a\_ d1zbma1 d1hsla\_ d1ixca2 d1jlna\_  
d1xvya\_ d1y9ua\_ d2z22a1 d1xoca1 d4oera\_ d1wdna\_ d5f1qa1 d1xt8a1  
d1i6aa\_ d4gwoa\_ d4igta1 d1pc3a\_ d4mmpa1 d1o63a\_ d2czla1 d2onsa2  
d4mija1 d4ok5a1 d2bmfa1 d2bmfa2 d1yksa1 d1yksa2 d2qeqa1 d2j1qa1  
d1a1va2 d1m8pa3 d1c4oa1 d2p6ra3 d2p6ra4 d1oywa2 d1oywa3 d1wrba1  
d1w36b2 d1w36b1 d1c4oa2 d3bora\_ d1t6na\_ d2eyqa5 d2eyqa3 d2eyqa2  
d2zu6a2 d1veca\_ d1uaaa1 d1w36d1 d2g9na1 d1z3ix2 d2rb4a\_ d1hv8a1  
d1hv8a2 d1t5ia\_ d1w36c2 d2j0sa2 d2j0sa1 d1fuka\_ d3hjha1 d1z5za1  
d1qdea\_ d1z63a1 d1s2ma2 d1s2ma1 d1wp9a1 d1wp9a2 d1gm5a4 d3dina4  
d3dina3 d1q0ua\_ d1w36c1 d1z3ix1 d1nkta3 d1nkta4 d1uaaa2 d1w36d2  
g1qhh.1 d2fwra2 d2fwra1 d3q3ma\_ d1za0a1 d2inca\_ d1jk0a\_ d2incb\_  
d1mhyb\_ d3hflb\_ d1mtyb\_ d1r2fa\_ d2uw1a\_ d1mhyd\_ d3n37a\_ d1afra\_  
d1oquc\_ d1syya\_ d1mtyd\_ d2o1za\_ d1uzra\_ d1smsa\_ d2fkza\_ d1zujal  
d1s3qa1 d2fjca1 d1z6om1 d1veia\_ d4dyya\_ d1jiga\_ d3gvya\_ d2pyba\_  
d4cy9a1 d3bvfa1 d1r03a\_ d2cf7a\_ d1nf4a\_ d1zs3a1 d4iwka\_ d3ka8a\_  
d3np0x\_ d1n1qa\_ d11b3a\_ d4e6ka\_ d1z6oa1 d2fzfa1 d4dyua\_ d3ge4a\_  
d1jgca\_ d4am4a\_ d2z6ma\_ d1ji5a\_ d1vlga\_ d1lkoa1 d1krqa\_ d3qz3a\_  
d1o9ra\_ d2ffxj\_ d1euma\_ d1yv1a1 d2v2pa\_ d1j30a\_ d4di0a\_ d1dpsa\_  
d1oewa\_ d2qzxa\_ d2asia\_ d1psoe\_ d1miqa\_ d1smra\_ d2h6ta\_ d1pfza\_  
d1lizda\_ d3hd8a\_ d1j71a\_ d1dpja\_ d4aa9a\_ d1t6ex\_ g1b5f.1 g1lya.1  
g1htr.1 d1qdma2 d1bxoa\_ d1wkra\_ d1tzsa\_ d1libqa\_ d2qzwa\_ d1bdqa\_  
d3ggta\_ d3ixoa\_ d1mrxa\_ d2haha\_ d1tw7a\_ d4njsa\_ d1sgua\_ d2p3da\_  
d1nsoa\_ d3d3ta\_ d2rkfa\_ d1c6ya\_ d2rspa\_ d3ogpa\_ d3ekwa\_ d2o4na\_  
d2j9ja\_ d1baia\_ d3ggua\_ d3lzua\_ d4npua\_ d4j55a\_ d2r8na\_ d2fxda\_  
d2p3ca\_ d4dqea\_ d3ttpa\_ d3t3ca\_ d2p3aa\_ d2hc0a\_ d2fdda\_ d3mwsa\_  
d1eh3a\_ d3skpa\_ d1dtza1 d1dtza2 d1ieja\_ d1jnfa2 d1ce2a1 d1jnfa1  
d1b1xa1 d1jw1a1 d1jw1a2 d1ryoa\_ d1h76a1 d1h76a2 d1k8rb\_ d1wgra1  
d1ef5a\_ d1wfy1 d1e8ya3 d1wgya1 d1l1fda\_ d2cs4a1 d1wxma1 d2byea1  
d3kh0a1 d2byfa1 d1wxaa1 d1e7ua3 d1e57b\_ d1auyb\_ d3h33a\_ d1rwja\_  
d19hca\_ d1os6a\_ d3bxua\_ d3h4na\_ d3caoa\_ d1j0pa\_ d2ctha\_ d1duwa\_  
d1ofwa\_ d2e84a\_ d1hh5a\_ d1gyoa\_ d3h34a\_ d1dszb\_ d1a6ya\_ d3cbba\_  
d1ynwa1 d1r4ia\_ d1hcqa\_ d2hana\_ d2hanb\_ d2enva1 d1kb4b\_ d2n11b\_  
d1l0la\_ d1cita\_ d2dara2 d2dara1 d1wyha2 d2dloa2 d1rutx4 d1rutx3  
d2cuqa2 d1x41a2 d1x41a1 d1x3ha2 d1x3ha1 d2d8za1 d1x61a2 d1x6aa1  
d1x6aa2 d2cora2 d2cora1 d1v6ga1 d1v6ga2 d2d8za2 d1x64a1 d1x64a2  
d1b8ta1 d2co8a1 d1x63a2 d2dj7a2 d2dj7a1 d2cu8a2 d2cu8a1 d1g47a2



d1g47a1 d1j2oa1 d1wyha1 d2dloa1 d1wiga1 d1wiga2 d2cupa2 d2cupa3  
d1x68a1 d2d8ya2 d2d8ya1 d1m3va2 d1x62a1 d1x68a2 d1x61a1 d1b8ta3  
d1b8ta2 d2d8xa2 d2d8xa1 d1x4ka1 d1x4ka2 d2cuqa1 d1m3va1 d2co8a2  
d1j2oa2 d1x63a1 d2cura1 d2cura2 d1x62a2 d21j7a\_ d1n4na\_ d2m8bb1  
d2kyqa\_ d3psma\_ d1jxca\_ d2g11a\_ d1ugla\_ d4uj0a\_ d2k4ua\_ d1hp2a\_  
d21u9a\_ d1baha\_ d2meoa1 d1wm7a\_ d1hlya\_ d1n8ma\_ d1jlza\_ d1wpda\_  
d1c55a\_ d1pvza\_ d1wt7a\_ d1wz5a\_ d1m2sa\_ d1pjva\_ d1c49a\_ d1qkya\_  
d2ktca1 d1wmta\_ d1du9a\_ d1j5ja\_ d1r1ga\_ d1t0za\_ d2i61a\_ d1t1ta\_  
d1kv0a\_ d21kba\_ d1npia\_ d1wwna\_ d1pe4a\_ d2kbka\_ d21i7a\_ d1djta\_  
d2kbha\_ d1dq7a\_ d1sega\_ d1omya\_ d1zywa1 d1jzaa\_ d1t61c1 d1iyjb4  
d1iyjb5 d1iyjb3 d1o7ia\_ d4ipca1 d1x3ea\_ d4apva\_ d1jb7a1 d1jb7a2  
d1jb7a3 d3kdfa\_ d1ue1b\_ d1wjja1 d3eiva\_ d1xjva2 d1xjva1 d2ccza2  
d1se8a\_ d1l1oc\_ d1jb7b\_ d1qvca\_ d3ulla\_ d1miua4 d1miua5 d1miua3  
d3g48a1 d1gd7a\_ d1mkha\_ d1jjcb3 d1pyba\_ d1y14b1 d2nn6i1 d1i94l\_  
d2zjra2 d1smxa\_ d2qamc2 d1hh2p1 d2r7da1 d1rl2a2 d1wfga1 d3bzka4  
d1x6oa2 d3a0ja\_ d2j01d2 d2ja9a1 d4q15a\_ d1hr0w\_ d1luza\_ d2n3sa\_  
d2vnud1 d1h95a\_ d1go3e1 d2nn6h1 d1ne3a\_ d2mola\_ d1iz6a2 d1jjga\_  
d1e3pa2 d2ix0a3 d2ix0a2 d21xja\_ d1ueba3 d1ueba2 d2z0sa1 d1u0la1  
d2ix0a1 d2eifa2 d2je6i1 d3i2za1 d2c35b1 d2ahob2 d1t9ha1 d3i4oa\_  
d2qall1 d1jt8a\_ d2nn6g1 d1g6pa\_ d3cama\_ d1i94q\_ d1c9oa\_ d1d7qa\_  
d2ba0a1 d2vnud2 d2vnud3 d1khia2 d2qalq1 d1wi5a1 d1xtda2 d1dgsa2  
d1ckma1 d1p16a1 d1x9na2 d1pfsa\_ d2a1ka\_ d1je5a\_ d2shpa1 d1yfoa\_  
d1l8ka\_ d2ooqa1 d1g4us2 d1p15a\_ d1lara2 d1lara1 d1wcha\_ d2fh7a2  
d2fh7a1 d1ohea1 d1ohea2 d2f4da\_ d1rxda\_ d2hxpa\_ d1xria\_ d1d5ra2  
d1fpza\_ d3ezza\_ d4y2ea\_ d1i9sa\_ d3azya\_ d3wvja\_ d1upsa1 d1ajoa\_  
d2hyka\_ d1ajka\_ d2vy0a\_ d1o4ya\_ d3o5sa\_ d3d6ea\_ d3atga\_ d1dypa\_  
d1umza\_ d3i4ia\_ g1qmo.1 g1len.1 d3zyra\_ d1n47a\_ g21tn.1 d1avba\_  
d3usua\_ d1dhkb\_ d1f9ka\_ d1lukga\_ d1g8wa\_ d1g9fa\_ d1wbfa\_ d3wcsa\_  
d1g7ya\_ g1loe.1 d1mvqa\_ d1hq1a\_ d1v6ia\_ d1dbna\_ d1qnwa\_ d1fx5a\_  
d4l8qa\_ d1ioaa\_ d3n35a\_ d3ubra\_ d1qo8a1 d1d4ca1 d2k3va\_ d1ft5a\_  
d1qdba\_ d1m1qa\_ d2j7aa\_ d1h21a\_ d1ogyb\_ d4fasa\_ d1jnia\_ d1sp3a\_  
d2h0ba\_ d2erfa\_ d1h30a2 d1h30a1 d3mw4a1 d1pz7a\_ d2r1ba\_ d3v64a1  
d1d2sa\_ d3bopa1 d3mw3a1 d1okqa1 d1okqa2 d1wioa4 d1vcaa1 d1dr9a2  
d1ic1a1 d2d9qb1 d2nxyb2 d1adqa1 d1fnga1 d1uvqb1 d1zs8a1 d2vola1  
d2vola2 d1mfb12 d2jelh2 d1uwel2 d3qq4b1 d1kjvb\_ d1k5na1 d4odh12  
d1ow0a1 d1ow0a2 d1bfob2 d3l9ra2 d3jtth1 d2fath2 d4elkb2 d1fn4b2  
d2xfxb\_ d1pg7x2 d1cqka\_ d4k71b2 d1l2a1 d1eapb2 d4l1fhg2 d1i4fa1  
d2nw2a2 d1kfah2 d1mhca1 d1h3ua1 d1wejh2 d1h0db2 d1a5fh2 d1kevh2  
d1mjuh2 d1qqda1 d1kcrh2 d1k8ia1 d3huja2 d2nnab1 d1nfd2 d3mffb2  
d1s9va1 d1l1k3h2 d1q0xl2 d1fv1b1 d1neza1 d4rfeb2 d1r3ha1 d1a6tb2  
d1kjva1 d1pz5b2 d1onqa1 d2bc4a2 d1de4a1 d1k8da1 d1tcra2 d1dn0b2  
d1nfd2 d2xwtb2 d1bfoa2 d1mexh2 d1iakb1 d1ypzf2 d4f7ea2 d1q72l2  
d2fbjh2 d1fe8h2 d1clzh2 d1fngb1 d1uvqa1 d1vgka1 d1c16a1 d4j12a2  
d4x99b2 d1igtb3 d1je6a1 d1q72h2 d1nldh2 d1teth2 d2hmic2 d1ilca2

d1i1ca1 d1k8ib1 d1q0yh2 d1kfa12 d3frua1 d1pg7w2 d1u58a1 d1igyb4  
d1igyb3 d1hyrc1 d1klub1 d1deeb2 d1c12b2 d2bc4b2 d2ig2h2 d1kcv12  
d3wn5b1 d11k2b\_ d11k312 d1mjul2 d1sm3h2 d1q0xh2 d1zvsal d1ydpal  
d1u8ib2 d1ypze2 d1kcuh2 d1op9a\_ d1y0la1 d1etzb1 d1legj11 d2gsib1  
d1nj9a1 d4jfh1 d1aqk11 d1t2ja\_ d1lo4h1 d1zvya1 d3v4vl1 d4enec1  
d1kxtb\_ d5e8ea1 d2pxya\_ d4weud\_ d1xiwc\_ d2esvd1 d1qznh\_ d1logae1  
d1f4xh1 d4n1hb\_ d3ezjb1 d3mlw11 d1kfah1 d1etza1 d1b4jh1 d3cfic\_  
d4w68a\_ d2arja1 d1ek3a\_ d2ok011 d1vera\_ d1uwgh1 d1blnb1 d1fpth1  
d1rzga1 d2giya1 d4m3kb1 d1nc2a1 d2nyyd1 d1ncna\_ d1fbih1 d5dxwa\_  
d4fqqa1 d1dqdh1 d1jfq11 d1kelh1 d1faih1 d1frg11 d1fig11 d4m6n11  
d1fo0a\_ d4hxb11 d3b5ga\_ d3quyd1 d2h9gb1 d1i8kb\_ d2dd8h1 d2ck0h1  
d1eaja\_ d4w6wb1 d2a6ib3 d1t66d1 d2e27h\_ d1ob1b1 d1f11b1 d2v7na1  
d1ad0a1 d2xt1b1 d1pskh1 d4i13b1 d2op411 d1a0q11 d1uwel1 d1za3a1  
d1ncb11 d4uu9a\_ d1bm3h1 d1cloh1 d1nqba2 d1cf8h1 d4y5va\_ d1mhph1  
d5anma1 d4cdgc1 d4ldeb\_ d1y0lb1 d2pcpb1 d1z3g11 d1dfb11 d1fh5h1  
d3g5xa1 d1tzib1 d4dn311 d3zhka1 d2b1hh1 d2uyla1 d1f3dh1 d1nj9b1  
d2agjh1 d2h1p11 d1q72h1 d8fabb1 d1ndmb1 d1rjca1 d4u6hb1 d3upca\_  
d2fbj11 d1osph1 d1tvda\_ d2cjvh\_ d4fhbd1 d1bd2d1 d1rz7h1 d3nn8a\_  
d1blna1 d1knoa1 d1nfda1 d2bmkb1 d1dq11\_ d1igyb1 d1igf11 d12e8h1  
d3utza1 d1nc2b1 d1rihh1 d4mwfb1 d4jvpa1 d1mieh1 d1rhfa1 d1fgn11  
d1sbsh1 d1lp9e1 d1dn0a1 d4lqf11 d1iaih1 d1kgcd1 d1mh5b1 d1gpol1  
d2g60h3 d1f8t11 d2jixd1 d4grwh\_ d1fo0b\_ d1bfob1 d1axsa1 d1u9ka\_  
d1nmbh\_ d1h8na1 d1h8na2 d1jguh1 d4eura1 d3sdy11 d35c8h1 d1w7211  
d1mvub\_ d1i9rh1 d1ob1a1 d4wenb\_ d1yeeh1 d3ietc1 d1f58h1 d1ad0b1  
d1mqk1\_ d1nbvh1 d4b50a\_ d3r8bb\_ d1baf11 d1mamh1 d4rgne1 d2gsgb\_  
d35c811 d1bafh1 d1ai1h1 d2pcpa1 d2fath1 d2x1pa\_ d1orsb1 d1ibgl1  
d1shma\_ d1a2yb\_ d1u0qa\_ d2coqa\_ d1hilb1 d1qfwi\_ d1jv5b\_ d1fn4b1  
d5e0qa\_ d1nsh1 d1plgl1 d4ocx11 d1kb5h1 d1rzfh1 d1pg7x1 d2fx7h1  
d2oi9c\_ d1l7i11 d3eyva1 d1d5i11 d4ffyl\_ d1a6wh\_ d1ac6a\_ d3dvfa\_  
d1nfdel d1mimh1 d1ri8a1 d1jhlh\_ d3dura\_ d1fskb1 d1f97a1 d3so3b1  
d2ak4d1 d1lp9f1 d4z7wf1 d1l7th1 d4y5ya\_ d4x7ec1 d1emth1 d1ikf11  
d1nlbh1 d4utal1 d1bjma1 d1eapb1 d1u6ah1 d2dtgd1 d1kj2b\_ d1xeda1  
d1cleh1 d1fgvh\_ d2bnub1 d2fb4h1 d2dtgb1 d1ktrh\_ d1jpth1 d1qkz11  
d4hepg\_ d2atpb1 d1flrh1 d2hrp11 d1mvfa\_ d1iaim1 d3k80a1 d2jb5h1  
d3zkxc\_ d4grwe\_ d1it9h1 d1rhhb1 d3w9ec\_ d1e4wh1 d1sy6h1 d2j6eh1  
d3qxta\_ d1jglh1 d1p7ka1 d1tzhb1 d4n8pa1 d1gaf11 d2jelh1 d1wioa2  
d4i0cc1 d1cicb1 d1lmka2 d1lmka1 d1iqwh1 d1orqb1 d1ejoh1 d1jnlh1  
d4zgl1a\_ d43c9b\_ d1ggbl1 d1wejh1 d3q6fa1 d1f3dj1 d3c6la1 d1bqlh1  
d3p9wb\_ d1a3r11 d1h0db1 d2uzil\_ d1eo811 d1qfwl\_ d1n7ml1 d1igja1  
d1c5ch1 d2a9mh\_ d1rmfh1 d1fj1b1 d4heme\_ d1ccza1 d1a5fh1 d1ogad1  
d1dlfh\_ d1qa9b\_ d1vgel1 d3qskb\_ d1sjxa\_ d4ozfg1 d1sq2n\_ d1qd0a\_  
d1kcvh1 d1c5db1 d3qcul1 d8faba1 d3bn9d1 d1mjuh1 d4y8dc\_ d7fabh1  
d3dvgb1 d1lo011 d1a6tb1 d1gigh1 d1kcrh1 d2hwz11 d1yjdc1 d3clfl1  
d4krna\_ d1dl71\_ d1e6ol1 d1mexh1 d3r0ma\_ d4kkna\_ d1fns11 d1loaqh\_

d1rzia1 d1lucbh1 d1ncw11 d4b41a\_ d1nfd1 d2mpah1 d2d7t11 d4grwf\_  
d4b5ea\_ d11k3h1 d3u79a\_ d4u3xa\_ d1ghf11 d1bvkb\_ d1mcww1 d1b88a\_  
d1jrrhh1 d32c2b1 d4wemb\_ d1dsfh\_ d1op3h1 d1ce111 d1iqda1 d1qoka1  
d1qoka2 d1qfuh1 d2crya1 d1ay1h1 d1oaql\_ d3ab0b\_ d1rur11 d1t4kb1  
d1bz7b1 d1n0xh1 d1for11 d1lucb11 d4w6yb\_ d43c9a\_ d2aab11 d1tzia1  
d4n1ca\_ d1k6qh1 d3g9ab\_ d4tvsa1 d1ligmh\_ d1pz5b1 d3dx9a1 d3wxwh\_  
d1nakh1 d1kcul1 d3eaka\_ d4qlra1 d1cr911 d1d9ka\_ d1f4x11 d1deea1  
d2i27n2 d1c12a1 d2orb11 d1j8hd1 d1mcp11 d1c5da1 d1kenh1 d1bd2e1  
d1h5ba\_ d4x7fc1 d3upaa\_ d1t3fa1 d1indh1 d2dtgc1 d4hc111 d1zv5a1  
d4wgvb\_ d1uwgl1 d4f37k1 d1aqkh1 d1vesa\_ d3zkqd\_ d1fpt11 d1lo411  
d1knob1 d3rrqa\_ d1ct8b1 d4orz\_ d1mlbb1 d4hgkc1 d1dqdl1 d1bogb1  
d4ozhe1 d1dr9a1 d1i7za1 d1dn0b1 d1kell1 d1rzib1 d1ypzf1 d1wtla\_  
d1hkfa\_ d1fail1 d1figh1 d2vyre\_ d1sjva\_ d1ohqa\_ d1bfoa1 d1pkqb1  
d1mjul1 d1b4j11 d1nsn11 d2arjb1 d1p4bh\_ d4aj0a\_ d3nn8b\_ d2rcja1  
d1f2xk\_ d4v1dd\_ d1adqh1 d2eksa\_ d4k3ga\_ d1jfqh1 d1uweh1 d1frgh1  
d4gftb\_ d1uz8b1 d4n1ea\_ d1bm311 d1clol1 d3mcka1 d2vq1a1 d1ae6h1  
d4aq1b1 d1uj3b1 d1nbqa1 d1fh511 d2ck011 d2ywza\_ d1q7211 d4nbxb\_  
d1hila1 d4hz1b1 d2j8811 d1zmya1 d1cd0a\_ d1a4ka1 d1psk11 d1a0qh1  
d4krmb\_ d1ncbh1 d2fbjh1 d1j8he1 d1i3ua\_ d1cf811 d1fe8h1 d2p1ya1  
d1eeqa\_ d2x89a\_ d1o10a\_ d2r01h1 d1ub5a1 d1dfbh1 d3eyvb1 d4jdvb1  
d4p2cg\_ d2gsia1 d2agj11 d1u3ha1 d2h1ph1 d1rih11 d1fskc1 d1boga1  
d2a7711 d1ospl1 d1qfoa\_ d3dwta\_ d2fx711 d1rz711 d3stba1 d1pkqa1  
d1b6da1 d1dzba2 d1dzba1 d1kj2a\_ d4l1ha\_ d1rzgb1 d1dq1h\_ d12e811  
d1mie11 d1jmaa\_ d1sbs11 d1fgnh1 d1f5811 d1mqkh\_ d1ndgb1 d3qeg11  
d1ia111 d2aw2a1 d1tqbc1 d3fo2a1 d4dkaa\_ d1f8th1 d2g6011 d2ywy\_  
d1uj3a1 d1yc7a\_ d3bd3a\_ d4w6xb1 d1nmb1\_ d1i8ka\_ d1rjlb1 d1ypzel  
d1p7kb1 d1kxqe\_ d1gpoh1 d2z4qa1 d1w72h1 d1i9r11 d4qgya1 d4xt1c\_  
d2qqnh1 d1cica1 d3c08h1 d2cd0a\_ d2bdnh1 d1hnga1 d1mam11 d1nldh1  
d1cr9h1 d4lcih1 d3bkyh1 d3qg711 d1ai111 d1kxvc\_ d4iosd\_ d1l7ih1  
d2x1qa\_ d1ub6b1 d3k74b\_ d1ibgh1 d1teth1 d1igya1 d1hxma1 d2x6ma\_  
d2e71a\_ d5e03a\_ d1qfwm\_ d2r0kh1 d1igjb1 d1rurh1 d1plgh1 d1mj8h1  
d1yuhb1 d3fmg11 d1rzf11 d1emtl1 d1ad9b1 d1igtb1 d1nlb11 d1d5ih1  
d3k7ua\_ d4ffyh\_ d1bwwa\_ d3dvga1 d1a6ta1 d1fgvl\_ d4qxgl1 d1mim11  
d1jh11\_ d2hffb1 d2hh011 d1qkzh1 d1l7t11 d1afvh1 d1iaii1 d2cjuh\_  
d1um5h1 d2ghwb2 d2ghwb1 d1kgce1 d2fgwh1 d1ikfh1 d1dvfd\_ d2i24n1  
d2xtjb\_ d1za3b1 d2yc1a\_ d2hh0h1 d2x1oa\_ d1bvka\_ d1rjla1 d5e7ba1  
d1igta1 d1il1b1 d2fb411 d1mvua\_ d1jpt11 d32c2a1 d1fvca\_ d1iqdb1  
d2hrph1 d2p4ab\_ d4qo1a\_ d1p2cb1 d1wt5c\_ d1t4ka1 d5c1mb\_ d1it911  
d1bz7a1 d1b2wh1 d1e4w11 d1jnl11 d1yedb1 d1za6b1 d3u7aa\_ d1igfh1  
d3gnm11 d1orsa1 d1wejl1 d1a2ya\_ d1hxmb1 d1gafh1 d2j4wh1 d1pz5a1  
d1j05a\_ d1a3rh1 d4fq111 d1qfwh\_ d1eo8h1 d1n7mh1 d4s11a\_ d1kegh1  
d5da4a\_ d1iqw11 d3whxb1 d1vgeh1 d1deeb1 d1c12b1 d1t2ql1 d1ad9a1  
d3gsnb1 d3b2uc1 d1ggbh1 d1t3fb1 d1nak11 d4ocmc\_ d1lila1 d2v7hb3  
d2esve1 d1mcoh1 d2qr0b1 d2q3aa\_ d1ct8a1 d1kcr11 d2pxyb\_ d2uzih\_

d5c3ld\_ d3durb\_ d1c5cl1 d2ak4e1 d1d17h\_ d1xiwd\_ d1mlba1 d1rmfl1  
d1i7zb1 d1d1fl\_ d2xa3a\_ d5bq7b1 d1dqqb1 d3h42l1 dlegjh1 d1kcvl1  
d1fe8l1 d2j6e11 d1f3rb2 d1lk3l1 d1sm3h1 d1q0xh1 d1ghfh1 d7fabl1  
d1igch1 d1l00h1 d4idla\_ d5c2bl\_ d1jrh11 d1l11a1 d3zhda1 d4kfzc\_  
d1b0wa\_ d1e6oh1 d1mexl1 d4krpb\_ d1fnsh1 d1ncwh1 d4hgma\_ d4eigb1  
d4rzca\_ d2mpa11 d4y5xa\_ d5en2b1 d3lrga1 d4ej1c1 d1rhha1 d1j05b\_  
d1forh1 d1q9wb1 d2wzpd\_ d2aq2a1 d1h0da1 d3revb1 d2ij0c1 d1tzh11  
d4m7j11 d1k6q11 d3b9kc1 d1igml\_ d3qeu1 d1dsfl\_ d1celh1 d1kcuh1  
d1zvha1 d1zvoa1 d1tqbb1 d1ay111 d2qsc11 d2cgrh1 d1n10h1 d1ken11  
d3eo0a1 d4n9ob1 d1n0x11 d3k1kc\_ d1c4qa\_ d1prtc1 d2wv6d\_ d1prtf\_  
d1l1trd\_ d4l63b1 d1r4pb\_ d1prtd\_ d1t10f\_ d2bosa\_ d1prtb1 d3chbd\_  
d2aq2b1 d1ck1a1 d1enfa1 d1i4pa1 d1v1oa1 d1et9a1 d1esfa1 d2g9hd1  
d4ohja1 d1klud1 d1bxta1 d1eu3a1 d1ty0a1 d1fnua1 d2cqva1 d1fhga\_  
d2k1ma\_ d2d12a1 d1biha3 d1biha1 d1biha4 d3qp3a1 d1g1ca\_ d1gxea\_  
d1cvsc2 d1cvsc1 d1xmwa2 d2otpa2 d1biha2 d1rhfa2 d2fcba2 d2fcba1  
d1wwbx\_ d1gsma2 d1epfa1 d1epfa2 d2dava1 d1waaa\_ d1f97a2 d1x44a1  
d1vcaa2 d1fnla2 d1fnla1 d3b5ha2 d3h8na2 d3h8na1 d1jbj11 d1jbj11  
d1pd6a\_ d1f2qa2 d1f2qa1 d3cx2a\_ d1nbqa2 d3b5ha1 d1n26a1 d1xiwb\_  
d1xaua\_ d1fltx\_ d2ifga1 d1olla1 d1olla2 d1cs6a4 d1cs6a3 d1cs6a2  
d1cs6a1 d2gw5a2 d1sy6a1 d1xiwa\_ d1lucta2 d1lucta1 d1ry7b2 d1gl4b\_  
d1qz1a3 d1olza1 d2c9aa1 d1wwca\_

**Family-2 (a.1.1.3)**

**Positive dataset contains 28 protein sequences.**

d4lmbx\_ d3v57a\_ d4f0ta\_ d2vjha\_ d4po5b\_ d4f0tb\_ d4h0mb\_ d2vjhb\_  
d4lm6b\_ d2vmlb\_ d2vjta\_ d3dbja\_ d2vmla\_ d2vjtb\_ d4f0ub\_ d4rmpa1  
d2uulb\_ d4lmsb\_ d4f0ua\_ d2bv8a\_ d2bv8b\_ d2c71b\_ d3dbjb\_ d4rmpb1  
d4h0ma\_ d3v57b\_ d2uula\_ d2j96a\_

**Negative dataset contains 3969 protein sequences.**

d1m32a\_ d1libja\_ d1c7na\_ d1iuga\_ d4q75a\_ d2bkwa1 d1t3ia\_ d1n8pa\_  
d1qz9a\_ d1jff9a\_ d1eg5a\_ d1p3wa\_ d3kgwa\_ d1cl1a\_ d2ctza1 d1vjoa\_  
d2rfva\_ d1gc0a\_ d1cs1a\_ d1d2fa\_ d2ch1a1 d1qgna\_ d1pffa\_ d1elua\_  
d1tq5a1 d1u08a\_ d1lc5a\_ d1b5pa\_ d2ay1a\_ d1bw0a\_ d3pd6a\_ d7aata\_  
d2csta\_ d1j32a\_ d1fg7a\_ d4wlha\_ d1o4sa\_ d1v2da\_ d1gdea\_ d1m6sa\_  
d1v72a1 d1svva\_ d1ajsa\_ d1wsta1 d2f8ja2 d1lk9a\_ d1vp4a1 d1xi9a1  
d2gb3a1 d3rcha\_ d3k40a\_ d1pmma\_ d2cfba1 d1dfoa\_ d1o69a\_ d1bj4a\_  
d3k28a\_ d2bwpa\_ d3lg0a\_ d2fnua\_ d3ou5a\_ d1z7da1 d1b9ha\_ d1iaya\_  
d4msoa\_ d1bs0a\_ d1s0aa\_ d1sffa\_ d3tqxa\_ d3qboa\_ d3pgya\_ d1bjna\_  
d2dkja\_ d1ejia\_ d1vefa1 d4wxga\_ d3bs8a\_ d3gbxa1 d1w23a\_ d1i26a\_  
d1ddla\_ d1e57b\_ d2wo3b\_ d1shxa\_ d1f56a\_ d1bypa\_ d1azca\_ d1ws8a\_  
d3u25a\_ d1cuoa\_ d1id2a\_ d1rkra\_ d2iaac\_ d4dp1x\_ d1nwpa\_ d2gima\_  
d2i7sa\_ d1qhqa\_ d3ehbb1 d1fftb1 d1gyca3 d1hfua2 d1kbva1 d1kbva2  
d1sdda1 d1sdda2 d1gyca2 d1mzya1 d2bw4a1 d1aoza1 d1aoza3 d1aoza2  
d1kyaa2 d1kyaa3 d1kyaa1 d1mzya2 d4e9sa1 d1sddb1 d1sddb2 d1hfua1  
d1hfua3 d1oe1a2 d1oe1a1 d1v10a2 d1v10a3 d1v10a1 d2dara2 d2dara1

d1wyha2 d2dloa2 d1rutx4 d1rutx3 d2cuqa2 d1x4la2 d1x4la1 d1x3ha2  
d1x3ha1 d2d8za1 d1x61a2 d1x6aa1 d1x6aa2 d2cora2 d2cora1 d1v6ga1  
d1v6ga2 d2d8za2 d1x64a1 d1x64a2 d1b8ta1 d2co8a1 d1x63a2 d2dj7a2  
d2dj7a1 d2cu8a2 d2cu8a1 d1g47a2 d1g47a1 d1j2oa1 d1wyha1 d2dloa1  
d1wiga1 d1wiga2 d2cupa2 d2cupa3 d1x68a1 d2d8ya2 d2d8ya1 d1m3va2  
d1x62a1 d1x68a2 d1x61a1 d1b8ta3 d1b8ta2 d2d8xa2 d2d8xa1 d1x4ka1  
d1x4ka2 d2cuqa1 d1m3va1 d2co8a2 d1j2oa2 d1x63a1 d2cura1 d2cura2  
d1x62a2 d2y5ia\_ d1psra\_ d3n22a\_ d2egda\_ d4ggfc\_ d2wcea\_ d2luca\_  
d4aqia\_ d3nsia\_ d2lp3a\_ d1j55a\_ d1a4pa\_ d1k8ua\_ d1nsha\_ d3kasa1  
d3bila3 d4qgna\_ d1vr3a1 d2bema\_ d1pama1 d1ea9c1 d1qhoa1 d2fhfa2  
d2fhfa1 d1k3ia1 d1j0ha1 d1cxl1a1 d2bhua1 d1edqa1 d1f1sa2 d1ut9a2  
d1gvia1 d1txka1 d4alac\_ d1pjwa\_ d1rera1 d1s6na\_ d3uzqb\_ d1jgta2  
d1ea0a3 d1ecfa2 d1q15a2 d1ct9a2 d1ao0a2 d1te5a\_ d2pa7a1 d1wlt1a1  
d1nxma\_ d2c0za1 d1fstb\_ d1g0da1 d1v70a\_ d2f4pa1 d1yhfa1 d4mh8a\_  
d4i7ga1 d1tafa\_ d1bh9b\_ d1tafb\_ d1jfib\_ d1h3ob\_ d2byka1 d1n1ja\_  
d4g92b\_ d1bh9a\_ d1jfia\_ d1h3oa\_ d2bykb1 d1n1jb\_ d2bjca1 d2hsga1  
d1qpza1 d1efaa1 d1r0ka3 d1j5pa3 d1vkoa2 d1vm6a2 d3qvsa2 d1p1ja2  
d2ovga\_ d1sq8a\_ d1rzsa\_ d3kz3a\_ d3orca\_ d3gpdg2 d2q49a2 d1hdgo2  
d2g17a2 d2cvoa2 d2czca1 d3pwka2 d1obfo2 d1i32a2 d1zyao2 d2pkqo2  
d1b7go2 d2hjsa2 d1cf2o2 d1vkna2 d1nvm2 d2msya\_ d2djoa1 d2r5za\_  
d1au7a1 d1f43a\_ d2lmda1 d1akhb\_ d1s7ea1 d3nara\_ d1zq3p1 d2craa1  
d1mija\_ d4uuta\_ d3a01a\_ d1x58a1 d3rkqa1 d3cmya1 d2cqa1 d2da6a1  
d1e3oc1 d1fjla\_ d1mh3a1 d1x41a1 d1wh7a1 d1gt0c1 d2mw8a\_ d1lfup\_  
d1x2ma1 d1b72a\_ d1wi3a1 d1jgga\_ d1wjha1 d1x2na1 d1mnmc\_ d2cuea1  
d3k2aa\_ d2hosa\_ d2jwta2 d1pufa\_ d1octc1 d2hi3a\_ d1b8ia\_ d4j19a\_  
d3lnqa\_ d1wh5a1 d1b8ib\_ d1fexa\_ d2cqra1 d1guua\_ d1ug2a1 d2cqqa1  
d2ajea1 d4a69c\_ d1h8ac1 d2crga1 d2iw5b1 d1xc5a1 d2cu7a1 d1wgxa1  
d2cjja1 d2ckxa1 d1gvda\_ d6paxa1 d1k78a1 d1k78a2 d1hlva1 d1hlva2  
d1iufa2 d1iufa1 d2iu5a1 d1zk8a1 d2g7sa1 d2fd5a1 d2np5a1 d1z0xa1  
d2id6a1 d2d6ya1 d2i10a1 d1vi0a1 d2oi8a1 d3c07a1 d2ns7a1 d2fq4a1  
d2yvea1 d1t33a1 d2o7ta1 d2np3b1 d2g7ga1 d2gena1 d2fbqa1 d2g71a1  
d2gfna1 d2g3ba1 d2jj7a1 d2hyja1 d1sgma1 d1ui5a1 d2hkua1 d2id3a1  
d4jyka1 d3lv8a\_ d1s3ga1 d1zaka1 d1s4qa\_ d3tvta2 d1uf9a\_ d1khta\_  
d1ckea\_ d1osna\_ d1p5zb\_ d4tmka\_ d3cm0a\_ d1tmka\_ d1jaga\_ d3h86a\_  
d1t0hb\_ d1nn5a\_ d2h92a\_ d3kb2a1 d2c95a1 d1yj5a2 d1kgda\_ d1ly1a\_  
d2ak3a1 d1vyva2 d1deka\_ d2grja1 d1p3ja1 d1y63a\_ d1e4ya1 d1s96a\_  
d3iija1 d1lvga\_ d1nksa\_ d1vyua2 d4e22a\_ d1qf9a\_ d1jjva\_ d1q3ta\_  
d1ki9a\_ d1lw7a2 d1teva\_ d1kjwa2 d2iyva2 d1kaga\_ d1viaa\_ d1m7ga\_  
d1x6va3 d1g3ma\_ d1j99a\_ d1t8ta1 d1fmja\_ d1zrha\_ d1ls6a\_ d2a3ra\_  
d1aqua\_ d2zptx\_ d3ckla\_ d1texa\_ d1q44a\_ d2gwaha\_ d1odfa\_ d1uj2a\_  
d4gi7a\_ d2jeoa1 d1rz3a\_ d1z0ja1 d3umra2 d3gj0a1 d2gaoa1 d1yzga1  
d1x3sa1 d1g7sa4 d1puja\_ d1udxa2 d1kk1a3 d2o52a\_ d1jwyb\_ d1zcaa2  
d1zcba2 d2fv8a1 d2cjwa\_ d3dz8a1 d1xzpa2 d1vg8a\_ d4qxaa\_ d2ew1a1  
d1x1ra1 d2bcgy\_ d3doea1 d3cona\_ d3rega\_ d3wyga\_ d1upta\_ d2b6ha1

d1zd9a1 d1lnza2 d1r5ba3 d1n0ua2 d1r2qa\_ d2f9la1 d2rhda\_ d3q3jb\_  
d3q85a\_ d1efma1 d1r8qa\_ d2gf9a1 d2akab1 d1ek0a\_ d1z08a1 d2gcoa1  
d2dyla2 d4g01b\_ d2cxxa1 d1svia\_ d3q72a\_ d1ni3a1 d4ac9a4 d2erxa1  
d2bmea\_ d1wxqa1 d2gf0a1 d4ldja1 d1zunb3 d1d5ca\_ d4lv5b\_ d1efca3  
d1kmqa\_ d2g6ba1 d3lrpa\_ d1tada2 d2y8ea\_ d4rd4a1 d1z06a1 d2heia\_  
d3a58b\_ d1u01a2 d1d2ea3 d1zj6a1 d2ocba\_ d3rwoa\_ d1mr3f\_ d2e9sa1  
d4u5xa1 d2iwra\_ d2fn4a1 d3bwdd\_ d2nzja1 d2atva1 d2ksqa\_ d3l43a\_  
d1mkya2 d1mkya1 d1wmsa\_ d1jnua3 d2rmka\_ d1f6ba\_ d1f60a3 d1gota2  
d1jala1 d2fh5b1 d1g16a\_ d2wblc\_ d1m7ba\_ d1wf3a1 d1f5na2 d1t9ha2  
d1z6xa1 d1z0aa1 d2fg5a1 d2a5ja1 d2bcjq2 d1ky3a\_ d4y0va\_ d4lhwa\_  
d2qmea1 d2atxa1 d1egaa1 d1ryha\_ d1moza\_ d1nrjb\_ d2erya1 d3bfka\_  
d1puia\_ d1fzqa\_ d3j3az1 d3t5ga\_ d1shza2 d3defa\_ d2f7sa1 d3raba\_  
d3tsoa\_ d3aq4a\_ d2a17a1 d3sfva1 d3bc1a\_ d1vava\_ d1luaia\_ d1jmx2  
d1jmx1 d1pbya1 d1ig8a1 d1czan2 d1czan3 d1czan1 d1ig8a2 d1czan4  
d1bg3a4 d1bg3a2 d1bg3a1 d3h3no1 d3h3no2 d3ezwa2 d1zc6a1 d1zbsa1  
d1zbsa2 d1zc6a2 d2ch5a2 d2ch5a1 d1zxo2 d1zxo1 d2d0oa3 d2d0oa2  
d1nbwa3 d1hroa\_ d4gedb\_ d3zooa\_ d1mz4a\_ d1gu2a\_ d1f1fa\_ d1dvva\_  
d1c6ra\_ d1c75a\_ d1e29a\_ d1gdva\_ d1cnoa\_ d1h32b\_ d1co6a\_ d2bh4x\_  
d2aiua\_ d5cytr\_ d1jdl\_ d1i8oa\_ d2zboa\_ d3dmia\_ d1ls9a\_ d1wvec\_  
d2yk3a\_ d3ph2b\_ d1dw0a\_ d5aura\_ d1q13a\_ d1qn2a\_ d1f1ca\_ d2nqya\_  
d1h4ga\_ d1hixa\_ d1oa2a\_ d1olra\_ d3b7ma\_ d4h7ma1 d3wp3a\_ d2vgda\_  
d1igoa\_ d3zsea\_ d2nlra\_ d3wx5a\_ d1oa3a\_ d1pvxa\_ d1m4wa\_ d1f5ja\_  
d1oa4a\_ d1ks5a\_ d4ix1a1 d2ah2a1 d1n1ta1 d3i2ka1 d1mpxa2 d1levsa\_  
d1cnt1\_ d1pvhb\_ d1z7ca\_ d1huwa\_ d1bgea\_ d1rhga\_ d1f6fa\_ d1f45b\_  
d1i1rb\_ d1axia\_ d4x51a\_ d1d9ca\_ d4ypgc1 d3oq3a\_ d1n1fa\_ d1aula\_  
d1wu3i\_ d3bes1\_ d3ux9a\_ d1v8fa\_ d2ejca\_ d3muea1 d3q12a1 d3rbaa\_  
d2qtra\_ d1nupa\_ d3l92a\_ d1qjca\_ d2h29a\_ d1vlha\_ d1lod6a\_ d1lw7a1  
d1mrza2 d4ruka\_ d2e17a\_ d1liq0a2 d1irxa2 d1r6ta2 d1liva4 d2cyba\_  
d1rqga2 d1j09a2 d2yxna\_ d1f7ua2 d1h3fa1 d1ffya3 d2g36a1 d1jila\_  
d1n3la\_ d1i6la\_ d1pfva2 d1h3na3 d3n9ia\_ d3sz3a1 d1m4la\_ d2bk7a\_  
d3fjua\_ d1z5ra1 d1kwma1 d1uwya2 d1jqga1 d2c1ca1 d1dtda\_ d3sw2a\_  
d1moxc\_ d1dx5i3 d1edmb\_ d1autl2 d1autl1 d1nqlb\_ d1dval1 d1szba2  
d1kigl\_ d2y5fl\_ d1ijqa2 d1gk5a\_ d1g1sa2 d1nt0a3 d1xdtr\_ d1lmja2  
d1lmja1 d1nzia2 d2wphe\_ d1klil\_ d1pfxl2 d1pfxl1 d1p9ja\_ d1g1ta2  
d1f7ea\_ d4yzub\_ d2mgpa1 d1b9wa1 d1b9wa2 d2mgpa2 d1ob1c1 d1ob1c2  
d1n1ia2 d1n1ia1 d2npra2 d2npra1 d1s5ja2 d1qhta2 d4dlea2 d1tgoa2  
d3py8a2 d1q8ia2 d2py5a2 d1d5aa2 d1pvaa\_ d3fs7a\_ d2pvba\_ d1ttxa\_  
d1rwya\_ d2kyfa\_ d1rk9a\_ d1a75a\_ d1exra\_ d1tiza1 d1nyaa\_ d1g8ia\_  
d1ggwa\_ d1wdcc\_ d3fwba\_ d1ggza\_ d2o5ga\_ d1ctaa\_ d1m45a\_ d3i5gc\_  
d1sl8a\_ d1fpwa\_ d2scpa\_ d2roaa\_ d4aqra\_ d3pn7b\_ d1br1b\_ d2mysb\_  
d1s6ca\_ d1bjfa\_ d2obha\_ d1jfka\_ d1jff0a\_ d1qv0a\_ d1lkja\_ d2mlfc\_  
d2m97a\_ d2d8na\_ d4by5a\_ d1jbaa\_ d4nqga\_ d1wdcb\_ d2mysc\_ d1j7qa\_  
d1s6ia\_ d1uhka2 d1r2ua\_ d1dtla\_ d3kf9a\_ d3pn7c\_ d1qjta\_ d1c07a\_  
d1gjya\_ d1y1xa\_ d1hqva\_ d1dvia\_ d1df0a1 d1qxp2 d4usla\_ d1k94a\_

d1wkya2 d1uuqa\_ d3wh9a\_ d4m1ra\_ d4xuya\_ d2je8a5 d4bf7a1 d3cuia\_  
d1ur4a\_ d1qw9a2 d1odza\_ d2vzsa5 d1bqca\_ d2x2ya1 d1hjqa\_ d1qnra\_  
d4y7ea1 d1vjza\_ d4k68a\_ d2v3ga\_ d4hpga\_ d1nofa2 d1nq6a\_ d1h4pa\_  
d1aq0a\_ d3ziza\_ d4bs0a\_ d1ecea\_ d1h1na\_ d1ta3b\_ d1w91a2 d1i1wa\_  
d1uhva2 d1us3a2 d1legza\_ d7a3ha\_ d1tvna1 d3nyda1 d1ghsa\_ d2cyga1  
d4xv0a\_ d2c8na2 d1w32a\_ d3emca\_ d1v6ya1 d1foba\_ d2uwfa1 d2fgla\_  
d3niya1 d2c0ha1 d1rh9a1 d1yq2a5 d1szna2 d1fa2a\_ d1pama4 d5do8a1  
d1ea9c3 d2fhfa5 d1qhoa4 d1avaa2 d1m53a2 d4m8ua1 d2gjpa2 d1lwha2  
d4howa1 d1ktba2 d1j0ha3 d3vm5a1 d2x1ia\_ d1wzaa2 d1uasa2 d2diea1  
d1mxga2 d1ht6a2 d1eswa\_ d1iv8a2 d5cpsa\_ d1ud2a2 d1zjaa1 d3gbea1  
d1kwga2 d1wdpa\_ d1gcya2 d1g5aa2 d1hvxa2 d3dhpa2 d2bhua3 d4do4a1  
d3qgva1 d1e43a2 d1g94a2 d2d3na2 d1gjwa2 d1gvia3 d1x1na1 d1r7aa2  
d1tz7a1 d4toqa\_ d1wb0a1 d1w9pa1 d1eoka\_ d1itxa1 d1kfwal d1goia2  
d1edqa2 d2gsja\_ d1hjxa1 d1jnda1 d1vf8a1 d1etob\_ d1umqa\_ d1g2ha\_  
d2w0pa\_ d2diaa1 d2e9ia2 d2e9ja1 d2dj4a1 d2eeba1 d2diba1 d2dmba1  
d2dmca1 d2d7oa1 d2ee6a1 d2d7pa1 d2eeaa1 d2di8a1 d1wlha1 d2d7na1  
d2nqca\_ d2d7ma1 d2dica1 d3cnka\_ d2k3ta1 d2eeca1 d1qfha1 d1qfha2  
d2bp3a1 d1v05a\_ d2ee9a1 d2eeda1 d2di9a1 d3syxa1 d1mkea1 d2p8va\_  
d1xoda1 d1evha\_ d1qc6a\_ d1legxa\_ d1id1a\_ d2hmta\_ d2v76a\_ d1wj1a1  
d1qqga2 d1qqga1 d1ntva\_ d1n3ha\_ d4dbba\_ d3f0wa1 d1p3ra\_ d1wgua1  
d2cy4a1 d3hqca\_ d1wvha1 d1xr0b1 d1wgqa1 d1v89a1 d2coda1 d1zc3b\_  
d1wg7a1 d1u5ea1 d1v61a1 d2coca1 d2ys1a1 d1v5pa1 d1ntya2 d1wjma1  
d1wila1 d1u29a\_ d1xx0a1 d1unqa\_ d2zkmx3 d1fhoa\_ d1v88a1 d2adza1  
d1x1fa1 d1p6sa\_ d2coaa1 d1v5ma1 d1faoa\_ d2x18a\_ d1dyna\_ d1x1ga1  
d4kaxb\_ d2j59m1 d1ki1b2 d1xcga2 d1txda2 d1u5da1 d1dbha2 d1wlha\_  
d1upqa\_ d1v5ua1 d1foea2 d2fj1a1 d1eaza\_ d2dfka2 d2cofa1 d1kz7a2  
d1h6ta1 d1h6ua1 d91dta1 d2ewda3 d1up7a1 d2dfda1 d1s6ya1 d1vjta1  
d7mdha1 d1hyea1 d1t2da1 d1ojsa3 d1b8pa1 d1ldna1 d1hyha1 d1cival1  
d2a92a1 d1ez4a1 d1i0za1 d1y6ja1 d1gv0a1 d1ur5a1 d1l1da1 d1lobba1  
d1v8ba1 d1l7da1 d2dlda1 d1mx3a1 d1ygya1 d1qp8a1 d1li4a1 d1j4aa1  
d2naca1 d1npya1 d3t4ea2 d1a4ia1 d1o0sa1 d2hk9a2 d2egga2 d1b26a1  
d1bvua1 d1gq2a1 d1c1da1 d1leha1 d1gtma1 d1euza1 d3dona2 d1ledza1  
d1gpja2 d1vi2a1 d1p77a1 d1nyta1 d1b0aa1 d1v16a1 d1v91a1 d3wdpp1  
d3wq5a\_ d1gnxa\_ d4gxpa\_ d4hz8a\_ d1e4mm\_ d3aiua\_ d1wcga1 d1qvba\_  
d3ahxa\_ d1v02a\_ d2dgaa\_ d1pbga\_ d1vffa1 d4ha4a\_ d1kola2 d1f8fa2  
d1qora2 d1jqba2 d1vj0a2 d1cdoa2 d1gu7a2 d1d1ta2 d1xa0a2 d2dm6a2  
d1jvba2 d1rjwa2 d1llua2 d1h2ba2 d1tt7a2 d1piwa2 d1o89a2 d1liz0a2  
d1e3ja2 d1yb5a2 d1uufa2 d1vj1a2 d1e3ia2 d3gpdg1 d1vc2a1 d2nvwa1  
d1u8fo1 d1ydwa1 d1hdgo1 d2g17a1 d1cf2o1 d2czca2 d1r0ka2 d1lobfo1  
d2cvoa1 d1ebfa1 d1h6da1 d1i32a1 d1zh8a1 d2q49a1 d1qkia1 d1j5pa4  
d3pzra1 d1xeea1 d1vkoa1 d1vm6a3 d3qvsa1 d2pkqo1 d1b7go1 d1gr0a1  
d1p1ja1 d1lc0a1 d1j0xo1 d3pwka1 d2hjsa1 d1zyao1 d1vkna1 d1t1ta1  
d1nvmbl d3sjua\_ d3ojfa1 d1xu9a1 d2jjya1 d1n7ha\_ d1y1pa1 d1h5qa\_  
d1jtva\_ d4fs3a\_ d2bkaa1 d1gy8a\_ d2c5aa1 d1ulsa\_ d1ooea\_ d2b69a1

d1y5ma1 d1spxa\_ d1ae1a\_ d1bxka\_ d1ydea1 d1gega\_ d1hdoa\_ d1o5ia\_  
d1e6ua\_ d1snya1 d2rhca\_ d3zv4a\_ d5ceja\_ d2d1ya1 d3w8ea\_ d2fmua1  
d1x1ta\_ d1rpna\_ d3ay7a1 d1k2wa\_ d1eq2a\_ d2hrba1 d3ruaa\_ d2ew8a1  
d4hwka\_ d1xgka\_ d2bd0a1 d1yo6a1 d2a35a1 d2ntva\_ d1vl8a\_ d1hdca\_  
d4bkua\_ d2ag5a1 d2q45a\_ d1nffa\_ d4iy1a\_ d1zbqa1 d1kewa\_ d1ek6a\_  
d1ja9a\_ d2q46a2 d1iy8a\_ d1cyda\_ d2ptga\_ d1hxha\_ d1uzma1 d3lyla\_  
d4m89a\_ d3weya\_ d2b11a1 d1w6ua\_ d1sb8a\_ d2q2va\_ d4nr0a\_ d1e6wa\_  
d2gasa\_ d3oiga1 d2bgka1 d1mxha\_ d1vl0a1 d1rkxa\_ d1r6da\_ d1wmaa1  
d1e7wa\_ d2c07a1 d1xkqa\_ d3tzha\_ d1g0oa\_ d3lz6a\_ d1qyca\_ d1ledoa\_  
d1gz6a\_ d1oc2a\_ d1t2aa\_ d1zema1 d2xoxa\_ d1z45a2 d1geea\_ d1p33a\_  
d3lt0a\_ d4e6pa\_ d2wyua\_ d1db3a\_ d4q9na\_ d1xhla\_ d4o1ma\_ d1fmca\_  
d2uvda\_ d2gdza1 d1uaya\_ d2z1ma\_ d2o23a2 d2fr1a2 d2fr1a1 d1qsga\_  
d1qyda\_ d4zjua\_ d2a4ka1 d1yb1a\_ d1wvga1 d1yxma1 d3f4ba\_ d1mg5a\_  
d1xg5a1 d1ex0a4 d1g0da4 d2f4ma1 d1x3za\_ d3u1ra1 d1g9ka2 d1kapp2  
d1k7ia2 d1t3ca\_ d1epwa3 d2a97a\_ d3f1ea\_ g1e1h.1 d3ioqa\_ d1fh0a\_  
d1o0ea\_ d1khqa\_ d1m6da\_ d2cb5a\_ d1cs8a\_ g8pch.1 d1s4va\_ d2pnsa\_  
d1vsna1 d1mira\_ d1iwda\_ d2oula\_ d7pcka\_ d3bwka\_ d3bcna\_ d2p86a\_  
d1pvja\_ d1pcia\_ d1gece\_ d1deua\_ d4bs6a\_ d1xkga1 d1cqda\_ d1jqpa2  
d2c0ya\_ d2bdza\_ d3p5ua\_ d1zoya1 d1qo8a2 d1d4ca2 d1chua2 d1jnra2  
d2jk6a2 d2jk6a1 d1feca1 d1feca2 d1lpfa1 d1lpfa2 d1xhca1 d1xhca2  
d1dx1a2 d1dx1a1 d1gera2 d1m6ia2 d1onfa1 d3lada2 d3lada1 d1w4xa1  
d1w4xa2 d1gesa2 d1mo9a1 d1xdia1 d1f12a2 d1f12a1 d1fcda1 d1fcda2  
d1h6va2 d1h6va1 d1mo9a2 d1gv4a2 d1gv4a1 d2gv8a2 d2gv8a1 d1aoga1  
d1aoga2 d1hyua1 d1ebda1 d1ebda2 d3dk9a1 d1q1ra2 d1q1ra1 d1gesa1  
d1zbf1a1 d2z1ha\_ d2etja1 d3qioa1 d2e41a\_ d1jl2a\_ d21sna1 d1io2a\_  
d1uaxa\_ d2yv0x\_ d1mu2a1 d1lekea\_ d1i39a\_ d1s5ja1 d2hbja2 d2igia\_  
d1wlja\_ d1qhta1 d4dlea1 d1tgoa1 d2f96a1 d3tr8a1 d3mxma\_ d1q8ia1  
d1y97a1 d1w0ha\_ d1kfsa1 d2py5a1 d1noya\_ d1d5aa1 d1yt3a3 d2guia\_  
d3mwpa1 d4kb1a\_ d1iuka\_ d2csua1 d3q9ub\_ d2yv1a1 d3q9na\_ d2d59a\_  
d1oi7a1 d2yv2a1 d1euca1 d1y81a1 d3nvva1 d1krha3 d2h88b1 d1n62a2  
d1t3qa2 d1zoyb1 d1jq4a\_ d1ffva2 d1dgja2 d1rm6c2 d1k8ka2 d1k8ka1  
d3uleb1 d3i33a2 d3i33a1 d1bupa1 d1dkgd2 d1dkgd1 d4ci6a2 d1jcfa1  
d4a2ba2 d2fxua1 d1yaga2 d4cbua2 d1bupa2 d1r7ha\_ d1faaa\_ d1wika1  
d1xfla\_ d1ttza1 d2f51a1 d1ti3a\_ d1nhoa\_ d1sena\_ d2i4aa\_ d1zmaa1  
d1fo5a\_ d3lefa1 d3diea1 d2yana1 d1z6na1 d1oaza\_ d3zywa1 d4aj8a\_  
d1nm3a1 d4fiwa\_ d1wmja\_ d4hs1a1 d1iloa\_ d1xwaa1 d1wjka1 d2vm1a\_  
d1fb6a\_ d1gh2a\_ d1h75a\_ d1nw2a\_ d1kx5b\_ d3a6na\_ d4m6ba2 d2nqbd\_  
d3wkjd\_ d2yfwe\_ d4h9na\_ d5bnxa\_ d1kx5c\_ d3r45a\_ d1eqzb\_ d4jjnb\_  
d1f66c\_ d1eqza\_ d4wnnb\_ d1kx5a\_ d1u35c1 d1id3a\_ d2nqbc\_ d1kx5d\_  
d2b5ea2 d2b5ea3 d2b5ea1 d2b5ea4 d2kp1a1 d2kp2a1 d1hyua3 d1hyua4  
d1j08a1 d1j08a2 d1pd212 d1nhya2 d2a2ra2 d1k0dd2 d1f2ea2 d1gsua2  
d2fhea2 d2pvqa1 d1tw9a2 d1oyja2 d1e6ba2 d1k0ma2 d3ik7a1 d4is0a1  
d1r5aa2 d1jlva2 d1m0ua2 d3gtub2 d1z9ha2 d1okta2 d1axda2 d2gsra2  
d1tu7a2 d1k3ya2 d1zgma1 d1b48a2 d1gnwa2 d1gwca2 d2gsta2 d1glqa2



d1oe8a2 d1pn9a2 d1v2aa2 d1fw1a2 d1duga2 d1lovna2 d1nira1 d1qksa1  
d4ilya\_ d1chka\_ d4olta\_ d1txga2 d3f47a1 d1mv8a2 d2pv7a2 d1xc2a3  
d2ahra2 d4xiya1 d2f1ka2 d1pgja2 d1i36a2 d1np3a2 d1lj8a4 d1teaa3  
d1qmgga2 d2i76a2 d2g5ca2 d1wdka3 d1dlja2 d3cuma3 d1qqya\_ d1gd6a\_  
d1f6ra\_ d1livma\_ d2gv0a\_ d1iiza\_ d2z2fa\_ d1j8xa\_ d1ghla\_ d1b9oa\_  
d174la\_ d169la\_ d2o4wa\_ d1p37a\_ d1k28a3 d1xjta1 d1jtma\_ d2f2qa\_  
d4e97a1 d1a3qa1 d1iknc\_ d3brda1 d1oy3c\_ d1imhc1 d1gjia1 d1zk9a1  
d2cxka1 d2k4ua\_ d1hp2a\_ d2lu9a\_ d1baha\_ d2meoa1 d1wm7a\_ d1hlya\_  
d1n8ma\_ d1jlza\_ d1wpda\_ d1c55a\_ d1pvza\_ d1wt7a\_ d1rjia\_ d1wz5a\_  
d1m2sa\_ d1pjva\_ d1c49a\_ d1qkya\_ d2ktca1 d1wmta\_ d1du9a\_ d1j5ja\_  
d1r1ga\_ d2pjsa1 d1k1la\_ d2i7ra1 d1ecea\_ d1xqaa1 d5cj3a1 d1npba\_  
d1jifa\_ d2p7oa\_ d1r9ca\_ d1mpya2 d1kw3b2 d1kw3b1 d4ghga1 d1tfza1  
d3isqa1 d3isqa2 d1sqia1 d1sqia2 d1lkda1 d1mpya1 d1cjxa2 d1cjxa1  
d1sp9b2 d1t47a1 d1t47a2 d1f1ua2 d1sp8a1 d1sp8a2 d1f1ua1 d1w5qa\_  
d2c1ha\_ d1ohla\_ d1l6sa\_ d1qsta\_ d2beia1 d4m3sa\_ d1u6ma1 d1ygha\_  
d1yk3a1 d3dr6a\_ d1xmta\_ d1z4ea1 d2ge3a1 d1bo4a\_ d2fiaa1 d2jdca1  
d1y9wa1 d3to7a\_ d1wwza1 d2f14a1 d2ozua1 d2b5ga\_ d2cy2a1 d2p0wa\_  
d1cm0a\_ d4pswa\_ d1yrea1 d1yr0a1 d1m4ia\_ d2gana1 d1yvka1 d1ghea\_  
d2g3aa1 d1y7ra1 d2euia1 d1q2ya\_ d2fsra1 d1xeba\_ d2ae6a1 d1cjwa\_  
d1qsma\_ d2aj6a1 d1y9ka1 d1i12a\_ d1vkca\_ d2atra1 d1n71a\_ d2d4pa1  
d2fiwa1 d2fe7a1 d1tiqa1 d2ou2a\_ d1yx0a1 d2fcka1 d1p0ha\_ d2j8ma\_  
d2pq8a\_ d1z4ra1 d1s3za1 d1ufha\_ d1dosa\_ d1gvfa\_ d3qm3a1 d2fjka\_  
d1xvqa1 d1pn0a2 d3hy2a\_ d2cvba1 d1o8xa\_ d1we0a1 d2bmxa1 d2a4va1  
d1psqa\_ d1xiya1 d1q98a\_ d1n8ja\_ d1zofa1 d2ggta\_ d3tjja\_ d4je1a1  
d1o73a\_ d3s9fa\_ d2zcta\_ d1qmva\_ d1jfua\_ d2b1ka\_ d5dvba1 d2b5xa1  
d2v2ga\_ d1st9a\_ d3tb2a\_ d4llra\_ d4fh8a1 d1e2ya\_ d1knga\_ d2h30a\_  
d1i5ga\_ d2z9sa\_ d2f8aa1 d1tp9a1 d2b7ka\_ d1nm3a2 d3hvva\_ d2wfca1  
d4kcea\_ d1xvwa1 d4gqca1 d3qpma\_ d4k1fa\_ d1zzoa1 d1gp1a\_ d1prxa\_  
d4od7a1 d1z6ma1 d4mcua1 d4dvca1 d1r4wa\_ d3l9sa\_ d1un2a\_ d3rppa\_  
d2m5ta\_ d1cqqa\_ d1wqsa\_ d5bpea\_ d2ipha\_ d1lvoa\_ d2bhga1 d3tnta\_  
d3sjia\_ d3d23a1 d2fyqa\_ d3tloa\_ d3zvea1 d2hrva\_ d3q3ya1 d4asha1  
d2phla2 d2phla1 d1fxza2 d1fxza1 d1lrha\_ d1uija1 g1dgw.1 d2v09a\_  
d1uika2 d1uika1 d1dgwa\_ d1e88a1 d1l6ja5 d1l6ja4 d1leaka4 d1leaka3  
d1l6ja3 d1h8pa1 d1etha2 d1w52x1 d2ppla1 d1hpla2 d1lpbb2 d2oxea1  
d1bu8a2 d1rpla2 d1ra6a\_ d1muka\_ d3gsza\_ d1te9a\_ d2xwha\_ d3uqsa\_  
d3hkwa\_ d3n6ma\_ d2cjqa\_ d2xyma\_ d1teba\_ d1te8a\_ d1s48a\_ d1u09a1  
d4wfxa\_ d3tyqa\_ d2pgga1 d1gyta2 d1lgya\_ d4l3wa\_ d1llfa\_ d1gz7a\_  
d1ukca\_ d2ftba\_ d1pmpa\_ d2rcqa1 d1fdqa\_ d4l1kpa\_ d1sa8a\_ d1vyfa\_  
d1lpja\_ d3vg7a1 d4azqa1 d5bvqa\_ d1p6pa\_ d2qo4a\_ d1opba\_ d1yiva1  
d1o1va\_ d4bvma1 d4tkba\_ d4i3ba\_ d1bwya\_ d1ftpa\_ d1ggla\_ d4gkca\_  
d1cbia\_ d3p6da1 d1kqwa\_ d2a0aa1 d3zxha\_ d1cgla\_ d1rm8a\_ d1leaka2  
d1hy7a\_ d2jsda\_ d1cxva\_ d1hv5a\_ d1i76a\_ d1eb6a\_ d3p0ya1 d1lgra1  
d1lgra2 d1n8yc2 d1n8yc1 d1m6ba2 d4dv8a2 d1j7na1 d1jx4a2 d3gv5b1  
d1t94a2 d3bq0a2 d2tbvc\_ d1c8nc\_ d1x36a\_ d1smvc\_ d1ng0c\_ d4sbvc\_

d1lopa\_ d1f2nc\_ d1cixa\_ d1y29a\_ d1v7fa\_ d2jtba\_ d1d1ha\_ d1g9pa\_  
d1lupa\_ d1qk7a\_ d1mb6a\_ d2a2va\_ d1niya\_ d1i25a\_ d1hvwa\_ d2mpqa\_  
d1ie6a\_ d1la4a\_ d2mxoa1 d1d10a\_ d1koza\_ d1qk6a\_ d1emxa\_ d1lqra\_  
d1c6wa\_ d1rmka\_ d1ixta\_ d1eyoa\_ d1cna\_ d1g1pa\_ d1f3ka\_ d1fyga\_  
d1rypd\_ d1irua\_ d1rypc\_ d3unfk\_ d1rypa\_ d1j2pa\_ d1irui\_ d1j2qh\_  
d3unfh\_ d1m4ya\_ d1rypb\_ d1irul\_ d1irug\_ d1iru2\_ d1q5rh\_ d1rypg\_  
d1iruf\_ d1q5qa\_ d1e94a\_ d1irub\_ d1ryph\_ d3ty6a\_ d1iruj\_ d1iruk\_  
d1rype\_ d1irud\_ d1irue\_ d3mi01\_ d1rypf\_ d1iruh\_ d2z3ba\_ d1iruc\_  
d3mka2\_ d1irul\_ d1ny721 d1ny722 d1a6ca3 d1a6ca2 d1a6ca1 d1pgl22  
d1pgl21 d1pgl11 d1mqta\_ d1d4m3\_ d1fmd3\_ d2mev1\_ glaym.1 d1evl3\_  
d4q4w1\_ d1r1a3\_ d2x5ia\_ d1rhi1\_ glr1a.1 gl4d4m.1 glrhi.1 d1b35b\_  
d1lopa\_ d1tme1\_ d4iv1a\_ glpvc.1 glfpn.1 d1fpn1\_ d4gb31\_ d1d4m1\_  
d1fmd1\_ d1evl1\_ d2wzr3\_ glcov.1 d1qqp3\_ glfmd.1 d2x5ic\_ d1rhi3\_  
gloop.1 d1hxs1\_ glhxs.1 d1fpn3\_ d1bev1\_ g2mev.1 d1eah3\_ d1aym1\_  
d1pvc3\_ d1zba3\_ d1h8ta\_ d3vbhc\_ glb35.1 glbev.1 d1hxs3\_ gl1ev1.1  
d1bev3\_ gltmf.1 d1tmf1\_ d1b35a\_ d2mev3\_ gleah.1 glh8t.1 d1eah1\_  
d4q4w3\_ d1r1a1\_ d1aym3\_ d1pvc1\_ d1zba1\_ d1h8tc\_ d1loopc\_ d1tme3\_  
glqqp.1 d4iv1c\_ gltme.1 d1y14b1 d2nn6i1 d1i941\_ d2zjra2 d1smxa\_  
d2qamc2 d1hh2p1 d2r7da1 d1r12a2 d1wfa1 d3bzka4 d1x6oa2 d3a0ja\_  
d2j01d2 d2ja9a1 d4q15a\_ d1hr0w\_ d1luza\_ d2n3sa\_ d2vnud1 d1h95a\_  
d1go3e1 d2nn6h1 d1ne3a\_ d2mola\_ d1iz6a2 d1jjga\_ d1e3pa2 d2ix0a3  
d2ix0a2 d2lxja\_ d1ueba3 d1ueba2 d2z0sa1 d1u01a1 d2ix0a1 d2eifa2  
d2je6i1 d3i2za1 d2c35b1 d2ahob2 d1t9ha1 d3i4oa\_ d2qall1 d1jt8a\_  
d2nn6g1 d1g6pa\_ d3cama\_ d1i94q\_ d1c9oa\_ d1d7qa\_ d2ba0a1 d2vnud2  
d2vnud3 d1khia2 d2qalq1 d1wi5a1 d1xtda2 d4w9ta\_ d4x2ra1 d1ka9f\_  
d1qo2a\_ d4axka1 d1thfd\_ d1h5ya\_ d4u28a\_ d2y88a\_ d4wd0a\_ d1vzwa1  
d1eixa\_ d3exra\_ d2ffca1 d2fdsa1 d3n3ma1 d2czda\_ d1q6oa\_ d2yyua\_  
d1vqta1 d1dbta\_ d3ldva1 d4lt9a1 d3tc7a1 d3hoja\_ d1i4na\_ d3vnda\_  
d3n18a1 d1geqa\_ d3naval d1v5xa\_ d4a2ra1 d3tc6a1 d1ujpa\_ d4ijba\_  
d1xcfa\_ d1vc4a\_ d1rd5a\_ d1qopa\_ d3b5va\_ d1azwa\_ d1mtza\_ d2xqfa\_  
d1f6wa\_ d1dx4a\_ d1qe3a\_ d1k4ya\_ d4qwwa\_ d2ha2a\_ d1sfra\_ d1f0na\_  
d4qeka\_ d3c8da2 d2pbla1 d1jkma\_ d1jjia\_ d1lzl1a\_ d1jjfa\_ d1jmx4  
d1pbya3 d1pbya4 d4iuaa3 d4bvva\_ d5hpga\_ d3k65a\_ d1ki0a3 d1ki0a2  
d1ki0a1 d1a0ha1 d1pmla\_ d3sp8a3 d2feba1 d1xova2 d1f74a\_ d3l21a\_  
d2e1da\_ d1to3a1 d1w3ia\_ d1sfla\_ d1n7ka\_ d1vcva1 d4imeaa\_ d1wa3a\_  
d2ocza1 d1f2ja\_ d3m16a\_ d2yxga\_ d1ub3a\_ d3a5fa\_ d1fbaa\_ d1l6wa\_  
d1xfba1 d1wx0a1 d1vpxa1 d1ojxa\_ d2a4aa1 d1xkya1 d3cq0a1 d3s1xa\_  
d1f05a\_ d1fdja\_ d3cpra1 d4d2ja\_ d1cg2a1 d1yloa2 d1y7ea2 d1y0ya3  
d1lfwa1 d1vixa1 d1fnoa4 d1vh0a2 d1ysja1 d1vhea2 d1z21a1 d2fvga2  
d1vgya1 d1r3na1 d2grea2 d1xmba1 glq71.1 d3rp2a\_ glucy.1 d1fuja\_  
d2zchp\_ d3w94a\_ d1si5h\_ d1lo6a\_ g2pka.1 d1cgha\_ d1kigh\_ d1a5ia\_  
d3s9ba\_ d1hj8a\_ d1ao5a\_ d2anya\_ d1q3xa1 d1gvza\_ d1azza\_ d4gsoa\_  
d2f91a1 d1iaua\_ d1gdna\_ d1eufa\_ glfiw.1 d1eq9a\_ d4nfea\_ d2rdla\_  
d1spja\_ d1elva1 d1a7sa\_ d1ekbb\_ d1pfxc\_ d1yc0a\_ d2aiqa\_ glfiz.1

d1fi8a\_ d4k60a\_ d4dgja\_ d1mzaa\_ dlop0a\_ d3tjva\_ d1pytd\_ d1sgfg\_  
g1gg6.1 d2eeka\_ g1rtf.1 d1a0ja\_ d3g01a\_ d1pytc\_ d4e7na\_ d1ddja\_  
d1z8ga1 d2hlca\_ d1npma\_ g1jou.1 d1sgfa\_ d1autc\_ g2hnt.1 g1kdq.1  
d1lorfa\_ d3s69a\_ d4crga\_ d1fxya\_ d1lbqya\_ d1svpa\_ d1mbma\_ d3su6a1  
d1cula1 d4agka\_ d1vcpa\_ d1q31a\_ g1n11.1 d3e90b\_ d1ep5a\_ d3u1jb\_  
d1dzka\_ d4t1ja\_ d2a2ua\_ d4wfva\_ d3t1da\_ d4iaxa\_ d3zq3a\_ d2nnda\_  
d1i4ua\_ d1kxoa\_ d1bbpa\_ d1kt7a\_ d1lexsa\_ d3s26a1 d1qfta\_ d4gh7a\_  
d1z24a1 d1qabe\_ d1xkia\_ d1ew3a\_ d3bx7a\_ d4iawa1 d1n0sa\_ d1gkab\_  
d3kzaa\_ d2k23a\_ d219ca1 d2joza1 d1gm6a\_ d3kffa\_ d3saoa1 d1e5pa\_  
d1yupa1 d1iiua\_ d31gia\_ d3i77a\_ d2z9ia2 d4nsva\_ d1lcya2 d4jcna\_  
d1agja\_ d1os8a\_ d1hpga\_ d1p3ca\_ d1l1ja\_ d1qtfa\_ d1e69a\_ d1mv5a\_  
d3g60a4 g1ii8.1 d1ewqa2 d1ji0a\_ d1qhla\_ d1v43a3 d2wmfa1 d1vpla\_  
d1g2912 d4a82a2 g1f2t.1 d2d62a1 d3tuic1 d2bbsa1 d3g60a3 d2ixea\_  
d1g6ha\_ d1sgwa1 d2qi9c\_ d3rlfa1 d3b60a1 d3d31a2 d2pzea1 g1xew.1  
d1jj7a\_ d1oxxk2 d2onka1 d1w1wa\_ d1iwea\_ d1qf5a\_ d1vmaa2 d1nija1  
d1np6a\_ d2p67a1 d3ihla\_ d1okkd2 d1ls1a2 d1slma2 d1liona\_ d2v40a\_  
d1dj3a\_ d3hida\_ d2vola1 d2g0ta1 d1vcoa2 d1j8mf2 d1g3qa\_ d1xjca\_  
d1p9ba\_ d1qzxa3 d1ihua2 d1ihua1 d2qm8a\_ d1dj2a\_ d4ioja\_ d1cp2a\_  
d1yrba2 d1hyqa\_ d3gqba2 d1skye3 d1xp8a1 d1tf7a2 d1tf7a1 d1ye8a1  
d1skyb3 d2qe7d2 d4blta\_ d4huta\_ d3ltaa2 d4hyya\_ d2i3ba1 d1crla\_  
d3j9tb2 d3ntua2 d1vdza1 d2z43a\_ d1e9ra\_ d1nlfa\_ d3ziaa2 d1n0wa\_  
d1g6oa\_ d3ziad2 d3j9ta2 d1pzna2 d3gqbb2 d2i49a\_ d1nnfa\_ d1xvxa\_  
d1ursa\_ d1h3da1 d1iuda\_ d4m1va1 d1twya\_ d3e13x\_ d2nxoa1 d4pfua\_  
d3ttma\_ d1elja\_ d2qmw1 d1us5a\_ d1y3na1 d1jeta\_ d1ugwa\_ d4f19a1  
d2esna2 d3thia\_ d3fasa1 d2uyeb\_ d2xwva1 d1r9la\_ d2fyia1 d1pb7a\_  
d2ozza1 d1sw5a\_ d1vr5a1 d2g29a\_ d1xs5a\_ d3lswa\_ d2z23a\_ d3w9va\_  
d3tcha\_ d1q35a\_ d1z7me1 d3q27a\_ d1p99a\_ d1ve4a1 d2i6ea1 d4mcoa1  
d4n8ya\_ d1eu8a\_ d1zbma1 d1hsla\_ d1lixca2 d1j1na\_ d1xvya\_ d1y9ua\_  
d2z22a1 d1xoca1 d4oera\_ d1wdna\_ d5f1qa1 d1xt8a1 d1i6aa\_ d4gwoa\_  
d4igta1 d1pc3a\_ d4mmpa1 d1o63a\_ d2czla1 d2onsa2 d4mija1 d4ok5a1  
d2bmfa1 d2bmfa2 d1yksa1 d1yksa2 d2qeqa1 d2jlqa1 d1a1va2 d1eh3a\_  
d3skpa\_ d1dtza2 d1ieja\_ d1jnfa2 d1ce2a1 d1jnfa1 d1b1xa2 d1b1xa1  
d1jw1a1 d1jw1a2 d1ryoa\_ d1h76a1 d1h76a2 d1c4oa1 d2p6ra3 d2p6ra4  
d1oywa2 d1oywa3 d1wrba1 d1w36b2 d1w36b1 d1c4oa2 d3bora\_ d1t6na\_  
d2eyqa5 d2eyqa3 d2eyqa2 d2zu6a2 d1veca\_ d1uaaa1 d1w36d1 d2g9na1  
d1z3ix2 d2rb4a\_ d1hv8a1 d1hv8a2 d1t5ia\_ d1w36c2 d2j0sa2 d2j0sa1  
d1fuka\_ d3hjha1 d1z5za1 d1qdea\_ d1z63a1 d1s2ma2 d1s2ma1 d1wp9a1  
d1wp9a2 d1gm5a3 d1gm5a4 d3dina4 d3dina3 d1q0ua\_ d1w36c1 d1z3ix1  
d1nkta3 d1nkta4 d1uaaa2 d1w36d2 g1qhh.1 d2fwra2 d2fwra1 d3q3ma\_  
d1za0a1 d1mxra\_ d2inca\_ d1jk0a\_ d2incb\_ d1mhyb\_ d3hf1b\_ d1mtyb\_  
d1r2fa\_ d2uw1a\_ d1mhyd\_ d3n37a\_ d1afra\_ d1oquc\_ d1syya\_ d1mtyd\_  
d2o1za\_ d1uzra\_ d1smsa\_ d2fkza\_ d1zujal d1s3qa1 d2fjca1 d1z6om1  
d1veia\_ d4dyya\_ d1jiga\_ d3gvya\_ d2pyba\_ d4cy9a1 d3bvfa1 d1r03a\_  
d2cf7a\_ d1nf4a\_ d1zs3a1 d4iwka\_ d3ka8a\_ d3np0x\_ d1n1qa\_ d1lb3a\_

d4e6ka\_ d1z6oa1 d2fzfa1 d4dyua\_ d3ge4a\_ d1jgca\_ d4am4a\_ d2z6ma\_  
d1ji5a\_ d1vlga\_ d1lkoa1 d3qz3a\_ d1o9ra\_ d2ffxj\_ d1euma\_ d1yv1a1  
d2v2pa\_ d1j30a\_ d4di0a\_ d1dpsa\_ d1oewa\_ d2qzxa\_ d2asia\_ d1psoe\_  
d1miqa\_ d1smra\_ d2h6ta\_ d1pfza\_ d1lizda\_ d3hd8a\_ d1j71a\_ d1dpja\_  
d4aa9a\_ d1t6ex\_ g1b5f.1 g11ya.1 g1htr.1 d1qdma2 d1bxoa\_ d1wkra\_  
d1tzsa\_ d1libqa\_ d2qzwa\_ d1bdqa\_ d3ggta\_ d3ixoa\_ d1mrxa\_ d2haha\_  
d1tw7a\_ d4njsa\_ d1sgua\_ d2p3da\_ d1nsoa\_ d3d3ta\_ d2rkfa\_ d1c6ya\_  
d3ogpa\_ d3ekwa\_ d2o4na\_ d2j9ja\_ d1baia\_ d3ggua\_ d3lzua\_ d4npua\_  
d4j55a\_ d2r8na\_ d2fxda\_ d2p3ca\_ d4dqa\_ d3ttpa\_ d3t3ca\_ d2p3aa\_  
d2hc0a\_ d2fdda\_ d3mwsa\_ d2za0a\_ d2c21a1 d1f9za\_ d1dgsa2 d1fvial  
d1ckma1 d1x9na2 d1h4ra3 d4y18a1 d2a16a3 d1wgda1 d1wgga1 d4q5eb\_  
d1wjna1 d1se9a\_ d3n3kb\_ d1wz0a1 d1we6a1 d2m0xa\_ d2gbka\_ d3rt3b1  
d1wh3a1 d1sifa\_ d2ekek2 d4ii2b1 d4hk2a1 d1c3ta\_ d1m94a\_ d1wgha1  
d1ttna1 d1j8ca\_ d1wx8a1 d3v6cb1 d2ma9b\_ d4i61b1 d1bt0a\_ d2jvca1  
d1iyfa\_ d2k1fa\_ d1wxva1 d1wf9a1 d1t0ya\_ d2io0b2 d1x1ma1 d2gbma\_  
d1zw7a1 d2m17a\_ d1ud7a\_ d1we7a1 d2lwpa\_ d2gbja\_ d1wjua1 d1v6ea1  
d1v86a1 d4eewa\_ d1wiaa1 d4icva\_ d4gu2a\_ d1wx7a1 d1wy8a1 d4hjk1a1  
d2fazal d1v5oa1 d2a13a1 d2cr5a1 d1wj4a1 d1s3sg\_ d1g66a\_ d1qoza\_  
d5ajha1 d4lu0a\_ d1of8a\_ d3unda1 d3e9aa1 d1vr6a2 d1n8fa\_ d2qkfa\_  
d1d9ea\_ d3h33a\_ d1rwja\_ d19hca\_ d1os6a\_ d3bxua\_ d3h4na\_ d1i77a\_  
d3caoa\_ d1j0pa\_ d2ctha\_ d1ofwa\_ d2e84a\_ d1hh5a\_ d1gyoa\_ d3h34a\_  
d1mixa2 d1e5wa2 d1j19a2 d1isna2 d2a16b2 d1dszb\_ d1a6ya\_ d3cbba\_  
d1ynwa1 d1r4ia\_ d1hcqa\_ d2hana\_ d2hanb\_ d2enva1 d1kb4b\_ d2n11b\_  
d1lola\_ d1cita\_ d1um8a\_ d1ixza\_ d1qvra2 d1qvra3 d1qzma\_ d1sxjc2  
d1jr3d2 d2p65a\_ d1l8qa2 d3hu3a3 d1sxjd2 d1njfa\_ d1in4a2 d1sxja2  
d1tuea1 d2ce7a2 d1w5sa2 d1sxjb2 d1d2na\_ d1ny5a2 d1ofha\_ d2gnoa2  
d2a5yb3 d1fnna2 d1u0ja1 d1lv7a\_ d1iqpa2 d2fnaa2 d1ixsb2 d4gita\_  
d1sxje2 d1g41a\_ d3ia2a\_ d1a88a\_ d4dgqa1 d1zoia\_ d1f15b\_ d1za7a\_  
d1laja\_ d1t0za\_ d2i61a\_ d1t1ta\_ d1sn4a\_ d1kv0a\_ d21kba\_ d1npia\_  
d1wwna\_ d1pe4a\_ d2kbka\_ d2li7a\_ d1djta\_ d2kbha\_ d1dq7a\_ d1sega\_  
d1zywa1 d1jzaa\_ d1n9wa1 d1bbua1 d1e1oa1 d1b8aa1 d1l0wa1 d3a74a1  
d1eova1 d1iyjb4 d1iyjb5 d1iyjb3 d1o7ia\_ d4ipca1 d1x3ea\_ d4apva\_  
d1jb7a1 d1jb7a2 d1jb7a3 d3kdfa\_ d1ue1b\_ d1wjja1 d3eiva\_ d1xjva2  
d1xjva1 d2ccza2 d1se8a\_ d1l1oc\_ d1jb7b\_ d1qvca\_ d1qzga\_ d1miua4  
d1miua5 d1miua3 d3g48a1 d1gd7a\_ d1mkha\_ d1jjcb3 d3ubub\_ d1egia\_  
d1qo3c\_ d1v7pa\_ d1tdqb\_ d3ubua\_ d1c3ab\_ d1h8ua\_ d3bx4b\_ d1t8ca1  
d1sb2a1 d1qdda\_ d2ziba1 d3cada\_ d1byfa\_ d1j34b\_ d1jwia\_ d1jzna\_  
d1c3aa\_ d1oz7b\_ d1wmza\_ d3bdwb\_ d1hq8a\_ d1fifa1 d1dv8a\_ d3hupa\_  
d1wk1a1 d1umra\_ d2afpa\_ d3bx4a\_ d1gz2a\_ d1sl6a\_ d1v7pb\_ d3g8ka\_  
d1ixxa\_ d1j34a\_ d1jwib\_ d1g1sa1 d1y17a1 d1ja3a\_ d1fvub\_ d3bdwa\_  
d1sb2b1 d1fvua\_ d1umrc\_ d1oz7a\_ d4m17a\_ d3cfwa1 d1ypqa1 d1g1ta1  
d3fd4a\_ d3l9jc\_ d4dn8a1 d1v41b\_ d1rd11\_ d2msba\_ d1prtc2 d1prtb2  
d1xwdc1 d3kj4a\_ d1w8aa\_ d2ifga3 d1p9ag\_ d1xkua\_ d1ohea1 d1ohea2  
d2f4da\_ d1rxda\_ d2hxpa\_ d1xria\_ d1d5ra2 d1fpza\_ d3ezza\_ d4y2ea\_

d3azya\_ d3wvja\_ dlupsa1 dlajoa\_ d2hyka\_ dlajka\_ d2vy0a\_ d1o4ya\_  
d3o5sa\_ d3d6ea\_ d3atga\_ dl1dypa\_ dlumza\_ d3i4ia\_ glqmo.1 gl1en.1  
d3zyra\_ dlfnya\_ d1n47a\_ g2ltn.1 dlavba\_ d3usua\_ d1dhkb\_ d1f9ka\_  
dlukga\_ dl1g8wa\_ dl1g9fa\_ dlwbfa\_ d3wcsa\_ dl1g7ya\_ gl1oe.1 dl1mvqa\_  
dlhq1a\_ dl1v6ia\_ dl1dbna\_ dl1qnwa\_ dl1fx5a\_ d4l8qa\_ dl1ioaa\_ d3n35a\_  
d3ubra\_ dl1qo8a1 dl1d4ca1 d2k3va\_ dl1ft5a\_ dl1qdba\_ dl1m1qa\_ d2j7aa\_  
dl1h21a\_ dl1ogyb\_ d4fasa\_ dl1jnia\_ dl1oaha\_ dl1sp3a\_ d2h0ba\_ d2erfa\_  
dl1h30a2 dl1h30a1 d3mw4a1 dl1pz7a\_ d2r1ba\_ d3v64a1 dl1d2sa\_ d3bopa1  
d3mw3a1 dl1okqa1 dl1okqa2 dl1ccza2 dl1vcaa1 dl1dr9a2 dl1ic1a1 d2d9qb1  
d2nxyb2 dl1adqa1 dl1fnga1 dl1uvqb1 dl1zs8a1 d2vola1 d2vola2 dl1mfb12  
d2jelh2 dl1uwel2 d3qq4b1 dl1k1vb\_ dl1k5na1 dl1osph2 d4odh12 dl1ow0a1  
dl1ow0a2 dl1bfob2 d3l19ra2 d3jtth1 d2fath2 d4elkb2 dl1fn4b2 d2xfxb\_  
dl1pg7x2 dl1cqka\_ d4k71b2 dl1l1k2a1 dl1eapb2 d4l1fhg2 dl1i4fa1 d2nw2a2  
dl1kfah2 dl1mhca1 dl1h3ua1 dl1wejh2 dl1h0db2 dl1a5fh2 dl1kcvh2 dl1mjuh2  
dl1qqda1 dl1kcrh2 dl1k8ia1 d3huja2 d2nnab1 dl1nfd2 d3mffb2 dl1s9va1  
dl1l1k3h2 dl1q0xl2 dl1fv1b1 dl1neza1 d4rfeb2 dl1r3ha1 dl1a6tb2 dl1kjva1  
dl1pz5b2 dl1onqa1 d2bc4a2 dl1de4a1 dl1k8da1 dl1tcra2 dl1dn0b2 dl1nfde2  
d2xwtb2 dl1bfoa2 dl1mexh2 dl1iakb1 dl1ypzf2 d4f7ea2 dl1q72l2 d2fbjh2  
dl1fe8h2 dl1clzh2 dl1fngb1 dl1uvqa1 dl1vgka1 dl1c16a1 d4j12a2 d4x99b2  
dl1igtb3 dl1je6a1 dl1q72h2 dl1nldh2 dl1teth2 d2hmic2 dl1i1ca2 dl1i1ca1  
dl1k8ib1 dl1q0yh2 dl1kfal2 d3frua1 dl1pg7w2 dl1u58a1 dl1igyb4 dl1igyb3  
dl1hyrc1 dl1klub1 dl1deeb2 dl1c12b2 d2bc4b2 d2ig2h2 dl1kcvl2 d3wn5b1  
dl1l1k2b\_ dl1l1k3l2 dl1mjul2 dl1sm3h2 dl1q0xh2 dl1zvsal dl1ydpal dl1u8ib2  
dl1ypze2 dl1kcu2 dl1op9a\_ dl1y0la1 dl1etzb1 dl1egj11 d2gsib1 dl1nj9a1  
d4jfhdl dl1aqk11 dl1t2ja\_ dl1lo4h1 dl1zvya1 d3v4vl1 d4enec1 dl1kxtb\_  
d5e8ea1 d2pxya\_ d4weud\_ dl1xiwc\_ d2esvd1 dl1qnzh\_ dl1ogae1 dl1f4xh1  
d4n1hb\_ d3ezjb1 d3mlw11 dl1kfah1 dl1etza1 dl1b4jh1 d3cfic\_ d4w68a\_  
d2arja1 dl1ek3a\_ d2ok0l1 dl1vera\_ dl1uwgh1 dl1blnb1 dl1fpth1 dl1rzga1  
d2giya1 d4m3kb1 dl1nc2a1 d2nyyd1 dl1ncna\_ dl1fbih1 d5dxwa\_ d4fqqa1  
dl1dqdh1 dl1jfq11 dl1kelh1 dl1faih1 dl1frgl1 dl1figl1 d4m6n11 dl1fo0a\_  
d4hxb11 dl1d3b5ga\_ d3quyd1 d2h9gb1 dl1i8kb\_ d2dd8h1 d2ck0h1 dl1eaja\_  
d4w6wb1 dl1d2a6ib3 dl1t66d1 d2e27h\_ dl1ob1b1 dl1f11b1 d2v7na1 dl1ad0a1  
d2xt1b1 dl1pskh1 dl1d4i13b1 dl1d2op4l1 dl1a0ql1 dl1uwel1 dl1za3a1 dl1ncb11  
d4uu9a\_ dl1bm3h1 dl1cloh1 dl1nqba2 dl1cf8h1 d4y5va\_ dl1mhph1 d5anma1  
d4cdgc1 dl1d4ldeb\_ dl1y0lb1 d2pcpb1 dl1z3gl1 dl1dfb11 dl1fh5h1 d3g5xa1  
dl1tzib1 dl1d4dn3l1 dl1d3zhka1 dl1d2b1hh1 dl1d2uyla1 dl1d1f3dh1 dl1d1nj9b1 dl1d2agjh1  
dl1d2h1pl1 dl1d1q72h1 dl1d8fabbl dl1d1ndmb1 dl1d1rjca1 dl1d4u6hb1 dl1d3upca\_ dl1d2fbj11  
dl1osph1 dl1d1tvda\_ dl1d2c1jvh\_ dl1d4f1hbd1 dl1d1bd2d1 dl1d1rz7h1 dl1d3nn8a\_ dl1d1blna1  
dl1knoa1 dl1dnfda1 dl1d2bmkb1 dl1d1dq11\_ dl1d1igyb1 dl1d1igf11 dl1d12e8h1 dl1d3utza1  
dl1d1nc2b1 dl1d1rihh1 dl1d4mwfb1 dl1d4jvpa1 dl1d1mieh1 dl1d1rhfa1 dl1d1fgn11 dl1d1sbs11  
dl1d1lp9e1 dl1d1dn0a1 dl1d4l1qf11 dl1d1iaih1 dl1d1kgcd1 dl1d1mh5b1 dl1d1gpol1 dl1d2g60h3  
dl1d1f8t11 dl1d2jixd1 dl1d4grwh\_ dl1d1fo0b\_ dl1d1bfob1 dl1d1axsa1 dl1d1u9ka\_ dl1d1nmbh\_  
dl1d1h8na1 dl1d1h8na2 dl1d1jguh1 dl1d4eura1 dl1d3sdy11 dl1d35c8h1 dl1d1w72l1 dl1d1mvub\_  
dl1d1i9rh1 dl1d1ob1a1 dl1d4wenb\_ dl1d1yeeh1 dl1d3ietc1 dl1d1f58h1 dl1d1ad0b1 dl1d1mqk1\_

d1nbvh1 d4b50a\_ d3r8bb\_ d1baf11 d1mamh1 d4rgne1 d2gsgb\_ d35c811  
d1bafh1 d1ai1h1 d2pcpa1 d2fath1 d2x1pa\_ dlorsb1 dlibgl1 d1shma\_  
d1a2yb\_ d1u0qa\_ d2coqa\_ d1hilb1 d1qfwi\_ d1jv5b\_ d1fn4b1 d5e0qa\_  
d1nsh1 d1plgl1 d4ocxl1 d1kb5h1 d1rzhf1 d1pg7x1 d2fx7h1 d2oi9c\_  
d1l7il1 d3eyva1 d1d5il1 d4ffyl\_ d1tet11 d1a6wh\_ d1ac6a\_ d3dvfa\_  
d1nfdel d1mimh1 d1ri8a1 d1jhlh\_ d3dura\_ d1fskb1 d1f97a1 d3so3b1  
d2ak4d1 d1lp9f1 d4z7wf1 d1l7th1 d4y5ya\_ d4x7ec1 d1emth1 d1likf11  
d1nlbh1 d4utal1 d1bjma1 d1eapb1 d1u6ah1 d2dtgd1 d1kj2b\_ d1xeda1  
d1cleh1 d1fgvh\_ d2bnub1 d2fb4h1 d2dtgb1 d1ktrh\_ d1jpth1 d1qkz11  
d4hepg\_ d2atpb1 d1flrh1 d2hrp11 d1mvfa\_ d1iaim1 d3k80a1 d2jb5h1  
d3zkxc\_ d4grwe\_ d1it9h1 d1rhhb1 d3w9ec\_ d1e4wh1 d1sy6h1 d2j6eh1  
d3qxta\_ d1jglh1 d1p7ka1 d1tzhb1 d4n8pa1 d1gaf11 d2jelh1 d1wioa2  
d4i0cc1 d1cicb1 d1lmka2 d1lmka1 d1iqwh1 d1lorqb1 d1ejoh1 d1jnlh1  
d4zgl1\_ d43c9b\_ d1ggbl1 d1wejh1 d3q6fa1 d1f3dj1 d3c6la1 d1bqlh1  
d3p9wb\_ d1a3r11 d1h0db1 d2uzil\_ d1eo811 d1qfwl\_ d1n7ml1 d1igja1  
d1c5ch1 d2a9mh\_ d1rmfh1 d1fj1b1 d4heme\_ d1ccza1 d1a5fh1 d1ogad1  
d1dlfh\_ d1qa9b\_ d1vgel1 d3qskb\_ d1sjxa\_ d4ozfg1 d1sq2n\_ d1qd0a\_  
d1kcvh1 d1c5db1 d3qcull d8faba1 d3bn9d1 d1mjuh1 d4y8dc\_ d7fabh1  
d3dvgb1 d1lo011 d1a6tb1 d1gigh1 d1kcrh1 d2hwz11 d1yjdc1 d3clfl1  
d4krna\_ d1d17l\_ d1e6ol1 d1mexh1 d3r0ma\_ d4kkna\_ d1fns11 d1loaqh\_  
d1rzia1 d1lucb1 d1ncw11 d4b41a\_ d1nfd11 d2mpah1 d2d7t11 d4grwf\_  
d4b5ea\_ d1l1k3h1 d3u79a\_ d4u3xa\_ d1ghf11 d1bvkb\_ d1mcww1 d1b88a\_  
d1jrhh1 d32c2b1 d4wemb\_ d1dsfh\_ d1op3h1 d1ce111 d1iqda1 d1qoka1  
d1qoka2 d1qfuh1 d2crya1 d1ay1h1 d1oaql\_ d3ab0b\_ d1rur11 d1t4kb1  
d1bz7b1 d1n0xh1 d1for11 d1lucb1 d4w6yb\_ d43c9a\_ d2aabl1 d1tzia1  
d4n1ca\_ d1k6qh1 d3g9ab\_ d4tvsa1 d1ligmh\_ d1pz5b1 d3dx9a1 d3wxwh\_  
d1kcull d3eaka\_ d4qlra1 d1cr911 d1d9ka\_ d1f4x11 d1deea1 d2i27n2  
d1c12a1 d2orbl1 d1j8hd1 d1mcph1 d1c5da1 d1kenh1 d1bd2e1 d1h5ba\_  
d4x7fc1 d3upaa\_ d1t3fa1 d1indh1 d2dtgc1 d4hc111 d1zv5a1 d4wgvb\_  
d1uwg11 d4f37k1 d1aqkh1 d1vesa\_ d3zkqd\_ d1fpt11 d1lo411 d1knob1  
d3rrqa\_ d1ct8b1 d4orz\_ d1mlbb1 d4hgkc1 d1dqd11 d1bogb1 d4ozhe1  
d1dr9a1 d1i7za1 d1dn0b1 d1kell1 d1rzi1 d1ypzf1 d1wtla\_ d1hkfa\_  
d1fail1 d1figh1 d2vyre\_ d1sjva\_ d1ohqa\_ d1bfoa1 d1pkqb1 d1mjul1  
d1b4j11 d1nsh1 d2arjb1 d1p4bh\_ d4aj0a\_ d3nn8b\_ d2rcja1 d1f2xk\_  
d4v1dd\_ d1adqh1 d2eksa\_ d4k3ga\_ d1jfqh1 d1uweh1 d1frgh1 d4gftb\_  
d1uz8b1 d4n1ea\_ d1bm311 d1clo11 d3mcka1 d2vq1a1 d1ae6h1 d4aq1b1  
d1uj3b1 d1nbqa1 d1fh511 d2ck011 d2ywza\_ d1q7211 d4nxbx\_ d1hila1  
d4hz1b1 d2j8811 d1zmya1 d1cd0a\_ d1a4ka1 d1psk11 d1a0qh1 d4krmb\_  
d1ncbh1 d2fbjh1 d1j8he1 d1i3ua\_ d1cf811 d1fe8h1 d2plya1 d1eeqa\_  
d2x89a\_ d1o10a\_ d2r0lh1 d1ub5a1 d1dfbh1 d3eyvb1 d4jdvb1 d4p2cg\_  
d2gsia1 d2agj11 d1u3ha1 d2h1ph1 d1rih1 d1fskc1 d1boga1 d2a7711  
d1osp11 d1qfoa\_ d3dwta\_ d2fx711 d1rz711 d3stba1 d1pkqa1 d1b6da1  
d1dzba2 d1dzba1 d1kj2a\_ d4l1ha\_ d1rzgb1 d1dqlh\_ d12e811 d1miel1  
d1jmaa\_ d1sbs11 d1fgnh1 d1f5811 d1mqkh\_ d1ndgb1 d3qeg11 d1ia111

d2aw2a1 d1tqbc1 d3fo2a1 d4dkaa\_ d1f8th1 d2g60l1 d2ywy\_ d1uj3a1  
d1yc7a\_ d3bd3a\_ d4w6xb1 d1nmb1\_ d1i8ka\_ d1rjlb1 d1ypze1 d1p7kb1  
d1kxqe\_ d1gpoh1 d2z4qa1 d1w72h1 d1i9rl1 d4qgya1 d4xt1c\_ d2qqnh1  
d1cica1 d3c08h1 d2cd0a\_ d2bdnh1 d1hnga1 d1mam11 d1nldh1 d1cr9h1  
d4lcih1 d3bkyh1 d3qg7l1 d1ai1l1 d1kxvc\_ d4iosd\_ d1l7ih1 d2x1qa\_  
d1ub6b1 d3k74b\_ d1libgh1 d1teth1 d1igya1 d1hxma1 d2x6ma\_ d2e7la\_  
d5e03a\_ d1qfwm\_ d2r0kh1 d1igjb1 d1rurh1 d1plgh1 d1mj8h1 d1yuhb1  
d3fmg11 d1rzfl1 d1emt11 d1ad9b1 d1igtb1 d1nlb11 d1d5ih1 d3k7ua\_  
d4ffyh\_ d1bwwa\_ d3dvga1 d1a6ta1 d1fgvl\_ d4qxgl1 d1mim11 d1jh11\_  
d2hffb1 d2hh0l1 d1qkzh1 d1l7t11 d1afvh1 d1iaii1 d2cjuh\_ d1um5h1  
d2ghwb2 d2ghwb1 d1kgce1 d2fgwh1 d1ikfh1 d1dvfd\_ d2i24n1 d2xtjb\_  
d1za3b1 d2yc1a\_ d2hh0h1 d2x1oa\_ d1bvka\_ d1rjla1 d5e7ba1 d1igta1  
d1il1b1 d2fb4l1 d1mvua\_ d1jpt11 d32c2a1 d1fvca\_ d1iqdb1 d2hrph1  
d2p4ab\_ d4qo1a\_ d1p2cb1 d1wt5c\_ d1t4ka1 d5c1mb\_ d1it9l1 d1bz7a1  
d1b2wh1 d1e4w11 d1jnl11 d1yedb1 d1za6b1 d3u7aa\_ d1igfh1 d3gnm11  
d1orsa1 d1wejl1 d1a2ya\_ d1hxmb1 d1gafh1 d2j4wh1 d1pz5a1 d1j05a\_  
d1a3rh1 d4fq1l1 d1qfwh\_ d1eo8h1 d1n7mh1 d4s11a\_ d1kegh1 d5da4a\_  
d1iqw11 d3whxb1 d1vgeh1 d1deeb1 d1c12b1 d1t2ql1 d1ad9a1 d3gsnb1  
d3b2uc1 d1ggbh1 d1t3fb1 d1nak11 d4ocmc\_ d1lila1 d2v7hb3 d2esve1  
d1mcoh1 d2qr0b1 d2q3aa\_ d1ct8a1 d1kcr11 d2pxyb\_ d2uzih\_ d5c3ld\_  
d3durb\_ d1c5c11 d2ak4e1 d1d17h\_ d1xiwd\_ d1mlba1 d1rmfl1 d1i7zb1  
d1dlfl\_ d2xa3a\_ d5bq7b1 d1dqqb1 d3h42l1 d1legjh1 d1kcv11 d1fe8l1  
d2j6e11 d1f3rb2 d1l1k3l1 d1sm3h1 d1q0xh1 d1ghfh1 d7fab11 d1igch1  
d1l00h1 d4idla\_ d5c2b1\_ d1jrh11 d1ill1a1 d3zhda1 d4kfcz\_ d1b0wa\_  
d1e6oh1 d1mexl1 d4krpb\_ d1fnsh1 d1ncwh1 d4hgma\_ d4eigb1 d4rzca\_  
d2mpa11 d4y5xa\_ d5en2b1 d3lrga1 d4ej1c1 d1rhha1 d1j05b\_ d1forh1  
d1q9wb1 d2wzpd\_ d2aq2a1 d1h0da1 d3revb1 d2ij0c1 d1tza1 d4m7j11  
d1k6ql1 d3b9kc1 d1igml\_ d3qeua1 d1dsfl\_ d1celh1 d1kcu11 d1zvha1  
d1zvoa1 d1tqbb1 d1ay1l1 d2qsc11 d2cgrh1 d1nl0h1 d1ken11 d3eo0a1  
d4n9ob1 d1n0xl1 d3k1kc\_ d1c4qa\_ d1prtc1 d2wv6d\_ d1prtf\_ d1l1trd\_  
d4l63b1 d1r4pb\_ d1prtd\_ d1tl0f\_ d1prtb1 d3chbd\_ d2aq2b1 d1ck1a1  
d1enfa1 d1i4pa1 d1v1oa1 d1et9a1 d1esfa1 d2g9hd1 d4ohja1 d1klud1  
d1bxta1 d1ty0a1 d1fnua1 d2cqva1 d1fhga\_ d2k1ma\_ d2dl2a1 d1biha3  
d1biha1 d1biha4 d3qp3a1 d1glca\_ d1gxea\_ d1cvsc2 d1cvsc1 d1xmwa2  
d2otpa2 d1biha2 d1rhfa2 d2fcba2 d2fcba1 d1wwbx\_ d1gsma2 d1epfa1  
d1epfa2 d2dava1 d1waaa\_ d1f97a2 d1x44a1 d1vcaa2 d1fnla2 d1fnla1  
d3b5ha2 d3h8na2 d3h8na1 d1jbja1 d1jbja2 d1pd6a\_ d1f2qa2 d1f2qa1  
d3cx2a\_ d1nbqa2 d3b5ha1 d1n26a1 d1xiwb\_ d1xaau\_ d1fltx\_ d2ifga1  
d1olla1 d1olla2 d1cs6a4 d1cs6a3 d1cs6a2 d1cs6a1 d2gw5a2 d1sy6a1  
d1xiwa\_ d1ucta2 d1ucta1 d1ry7b2 d1gl4b\_ d1qz1a3 d1olza1 d2c9aa1  
d1wwca\_

**Family-3 (a.138.1.1)**

**Positive dataset contains 6 protein sequences.**

d3h33a\_ d1rwja\_ d3bxua\_ d3h4na\_ d2e84a\_ d3h34a\_

**Negative dataset contains 4019 protein sequences.**

d1m32a\_ d1libja\_ d1c7na\_ d1iuga\_ d4q75a\_ d2bkwa1 d1t3ia\_ d1n8pa\_  
d1qz9a\_ d1jf9a\_ d1eg5a\_ d1p3wa\_ d3kgwa\_ d1c11a\_ d2ctza1 d1vjoa\_  
d2rfva\_ d1gc0a\_ d1cs1a\_ d1d2fa\_ d2ch1a1 d1qgna\_ d1pffa\_ d1elua\_  
d1ax4a\_ d2v1pa1 d2ez1a\_ d1u08a\_ d1lc5a\_ d1b5pa\_ d2ay1a\_ d1bw0a\_  
d3pd6a\_ d7aata\_ d2csta\_ d1j32a\_ d1fg7a\_ d4wlha\_ d1o4sa\_ d1v2da\_  
d1gdea\_ d1m6sa\_ d1v72a1 d1svva\_ d1ajsa\_ d1wsta1 d2f8ja2 d1lk9a\_  
d1vp4a1 d1xi9a1 d2gb3a1 d1xkta1 d2hfka\_ d5d3ka\_ d2cfba1 d1dfoa\_  
d1o69a\_ d1bj4a\_ d3k28a\_ d2bwpa\_ d3lg0a\_ d2fnua\_ d3ou5a\_ d1z7da1  
d1b9ha\_ d1iaya\_ d4msoa\_ d1bs0a\_ d1s0aa\_ d1sffa\_ d3tqxa\_ d3qboa\_  
d3pgya\_ d1bjna\_ d2dkja\_ d1ejia\_ d1vefa1 d4wxga\_ d3bs8a\_ d3gbxa1  
d1w23a\_ d2tbvc\_ d1c8nc\_ d1x36a\_ d1smvc\_ d1ng0c\_ d4sbvc\_ d1lopa\_  
d1f2nc\_ d3lgia\_ d3i77a\_ d2z9ia2 d4nsva\_ d1lcya2 d4jcna\_ d1agja\_  
d1os8a\_ d1hpga\_ d1l1ja\_ d1qtfa\_ d1ddla\_ d1e57b\_ d1auyb\_ d1qnia1  
d1libya\_ d1f56a\_ d1bypa\_ d1azca\_ d1ws8a\_ d3u25a\_ d1cuoa\_ d1id2a\_  
d1rkra\_ d2iaac\_ d4dp1x\_ d1nwpa\_ d2gima\_ d2i7sa\_ d1qhqa\_ d3ehbb1  
d1fftb1 d1gyca3 d1kbva1 d1kbva2 d1sdda1 d1sdda2 d1gyca1 d1gyca2  
d1mzya1 d2bw4a1 d1aoza1 d1aoza3 d1aoza2 d1kyaa2 d1kyaa3 d1kyaa1  
d1mzya2 d4e9sa1 d1sddb1 d1sddb2 d1hfua1 d1hfua3 d1oe1a2 d1oe1a1  
d1v10a2 d1v10a3 d1v10a1 d1iknc\_ d3brda1 d1p7h11 d1oy3c\_ d1imhc1  
d1gjia1 d1zk9a1 d2cxka1 d2bema\_ d1pama1 d1ea9c1 d1qhoa1 d2fhfa2  
d2fhfa1 d1k3ia1 d1j0ha1 d1cxl1a1 d2bhua1 d1edqa1 d1f1sa2 d1ut9a2  
d1gvia1 d1txka1 d4alac\_ d1rera1 d1s6na\_ d3uzqb\_ d2phla2 d2phla1  
d1fxza2 d1lrha\_ d1uija1 g1dgw.1 d2v09a\_ d1uika2 d1uika1 d1dgwa\_  
d1ep0a\_ d2pa7a1 d1wlta1 d2c0za1 d1ds6b\_ d1fstb\_ d1ex0a1 d1g0da1  
d1cg2a1 d1yloa2 d1y7ea2 d1y0ya3 d1lfwa1 d1vixa1 d1fnoa4 d1vhoa2  
d1ysja1 d1vhea2 d1z2la1 d2fvga2 d1vgya1 d1r3na1 d2grea2 d1xmba1  
d1rtqa\_ d2ovga\_ d1sq8a\_ d1rzsa\_ d3kz3a\_ d3orca\_ d3gpdg2 d2q49a2  
d1hdgo2 d2g17a2 d2cvoa2 d2czca1 d3pwka2 d1obfo2 d1i32a2 d1zyao2  
d2pkqo2 d1b7go2 d2hjsa2 d1cf2o2 d1vkna2 d1nvm2 d1lux8a\_ d4i0va\_  
d2bkma\_ d1dlwa\_ d2bmma\_ d2msya\_ d2djoa1 d2r5za\_ d1au7a1 d1f43a\_  
d2lmda1 d1akhb\_ d1s7ea1 d3nara\_ d1zq3p1 d2craa1 d1mija\_ d4uuta\_  
d3a01a\_ d1x58a1 d3rkqa1 d3cmya1 d2cqxa1 d2da6a1 d1e3oc1 d1fjla\_  
d1mh3a1 d1ig7a\_ d1x41a1 d1wh7a1 d1gt0c1 d2mw8a\_ d1lfup\_ d1x2ma1  
d1b72a\_ d1wi3a1 d1jgga\_ d1wjha1 d1x2na1 d1nmnc\_ d2cuea1 d3k2aa\_  
d2hosa\_ d2jwta2 d1pufa\_ d1oact1 d2hi3a\_ d1b8ia\_ d4j19a\_ d3lnqa\_  
d1wh5a1 d1fexa\_ d2cqra1 d1guua\_ d1ug2a1 d2cqqa1 d2ajea1 d4a69c\_  
d1h8ac1 d2crga1 d2iw5b1 d1xc5a1 d1ofcx1 d2cu7a1 d1wgxa1 d2cjja1  
d2ckxa1 d1gvda\_ d1hcra\_ d1tc3c\_ d1gdta1 d1u78a2 d6paxa1 d6paxa2  
d1k78a1 d1hlva1 d1hlva2 d1iufa2 d1iufa1 d2iu5a1 d1zk8a1 d2g7sa1  
d2fd5a1 d2np5a1 d1z0xa1 d2id6a1 d2d6ya1 d2i10a1 d1vi0a1 d2oi8a1  
d3c07a1 d2ns7a1 d2fq4a1 d2yvea1 d1t33a1 d2o7ta1 d1rkta1 d2np3b1  
d2g7ga1 d2gena1 d2fbqa1 d2g7la1 d2gfna1 d2g3ba1 d2jj7a1 d2hyja1  
d1sgma1 d1ui5a1 d2hkua1 d2id3a1 d4jyka1 d1bl0a2 d1d5ya1 d1d5ya2



d3ubub\_ dlegia\_ dlqo3c\_ dlv7pa\_ dltdqb\_ d3ubua\_ dlc3ab\_ dlh8ua\_  
d3bx4b\_ dl18ca1\_ dl1sb2a1\_ dlqdda\_ d2ziba1\_ d3cada\_ dlbyfa\_ dlj34b\_  
dljwia\_ dljzna\_ dl1c3aa\_ dlwmza\_ d3bdwb\_ dlhq8a\_ dl1fifa1\_ dl1dv8a\_  
d3hupa\_ dlwk1a1\_ dlumra\_ d2afpa\_ d3bx4a\_ dlgz2a\_ dl1s16a\_ dl1v7pb\_  
d3g8ka\_ dl1ixxa\_ dlj34a\_ dljwib\_ dlgl1sa1\_ dl1y17a1\_ dlja3a\_ dl1fvub\_  
d3bdwa\_ dl1sb2b1\_ dl1fvua\_ dlumrc\_ dl1oz7a\_ d4m17a\_ d3cfwa1\_ dl1ypqa1  
dlgl1ta1\_ d3fd4a\_ d3l19jc\_ d4dn8a1\_ dl1v41b\_ dl1rd11\_ d2msba\_ d3l1v8a\_  
dl1s3ga1\_ dl1zaka1\_ dl1s4qa\_ d3tvta2\_ dl1uf9a\_ dl1khta\_ dl1ckea\_ dl1osna\_  
dl1p5zb\_ d3cm0a\_ dl1tmka\_ dl1jaga\_ d3h86a\_ dl1t0hb\_ dl1nn5a\_ d2h92a\_  
d3kb2a1\_ d2c95a1\_ dl1yj5a2\_ dl1kgda\_ dl1ly1a\_ d2ak3a1\_ dl1vyva2\_ dl1deka\_  
d2grja1\_ dl1p3ja1\_ dl1y63a\_ dl1e4ya1\_ dl1s96a\_ d3iija1\_ dl1lvga\_ dl1nksa\_  
dl1vyua2\_ d4e22a\_ dl1qf9a\_ dl1jjva\_ dl1q3ta\_ dl1ki9a\_ dl1lw7a2\_ dl1teva\_  
dl1kjwa2\_ dl1gsia\_ d2iyva2\_ dl1kaga\_ dl1viaa\_ dl1e6ca\_ d2xlba\_ d3m83a1  
dl1g3ma\_ dl1j99a\_ dl1t8ta1\_ dl1nsta\_ dl1fmja\_ dl1zrha\_ dl1ls6a\_ d2a3ra\_  
d2zptx\_ d3ckla\_ dl1texas\_ dl1q44a\_ d2gwha\_ dl1uj2a\_ d4gi7a\_ d2jeoa1  
dl1rz3a\_ dl1z0ja1\_ d3umra2\_ d3gj0a1\_ d2gaoa1\_ dl1yzga1\_ dl1x3sa1\_ dl1g7sa4  
dl1puja\_ dl1udxa2\_ dl1kk1a3\_ d2o52a\_ dl1jwyb\_ dl1zcaa2\_ dl1zcba2\_ d2fv8a1  
d2cjwa\_ d3dz8a1\_ dl1xzpa2\_ dl1vg8a\_ d4qxaa\_ d2ew1a1\_ dl1x1ra1\_ d2bcgy\_  
d3doea1\_ d3cona\_ d3rega\_ d3wyga\_ dl1upta\_ d2b6ha1\_ dl1zd9a1\_ dl1lnza2  
dl1r5ba3\_ dl1n0ua2\_ dl1r2qa\_ d2f91a1\_ d2rhda\_ d3q3jb\_ d3q85a\_ dl1efma1  
dl1r8qa\_ d2gf9a1\_ d2akab1\_ dl1ek0a\_ dl1z08a1\_ d2gcoa1\_ d2dy1a2\_ d4g01b\_  
d2cxa1\_ dl1svia\_ d3q72a\_ dl1ni3a1\_ d4ac9a4\_ d2erxa1\_ d2bmea\_ dl1wxqa1  
d2gf0a1\_ d4ldja1\_ dl1zunb3\_ d4lv5b\_ dl1efca3\_ dl1kmqa\_ d2g6ba1\_ d3l1rpa\_  
dl1tada2\_ d2y8ea\_ d4rd4a1\_ dl1z06a1\_ d2heia\_ d3a58b\_ dl1u01a2\_ dl1d2ea3  
dl1zj6a1\_ d2ocba\_ d3rwoa\_ dl1mr3f\_ d2e9sa1\_ d4u5xa1\_ d2iwra\_ d2fn4a1  
d3bwdd\_ d2nzja1\_ d2atva1\_ d2ksqa\_ d3l143a\_ dl1mkya2\_ dl1mkya1\_ dl1wmsa\_  
dl1jn3a\_ d2rmka\_ dl1f6ba\_ dl1f60a3\_ dl1gota2\_ dl1jala1\_ d2fh5b1\_ dl1gl16a\_  
d2wblc\_ dl1m7ba\_ dl1wf3a1\_ dl1f5na2\_ dl1t9ha2\_ dl1z6xa1\_ dl1z0aa1\_ d2fg5a1  
d2a5ja1\_ d2bcjq2\_ dl1s0ua3\_ dl1ky3a\_ d4y0va\_ d4lhwa\_ d2qmea1\_ d2atxa1  
dlegaa1\_ dl1ryha\_ dl1moza\_ dl1nrjb\_ d2erya1\_ d3bfka\_ dl1puia\_ dl1fzqa\_  
d3j3az1\_ d3t5ga\_ dl1shza2\_ d3defa\_ d2f7sa1\_ d3raba\_ d3tsoa\_ d3aq4a\_  
d2a17a1\_ d3sfva1\_ d3bc1a\_ d2ncda\_ dl1sdma\_ d3h4sa1\_ d2heha\_ d2grya\_  
g3kin.1\_ dl1kk8a2\_ dl1br2a2\_ dl1goja\_ d2mysa2\_ dl1lkxa\_ d3t0qa\_ d4db1a1  
d3gbja\_ dl1ry6a\_ dl1v8ka\_ dl1s5ja2\_ dl1qhta2\_ d4dlea2\_ dl1tgoa2\_ d3py8a2  
dl1q8ia2\_ dl1kfsa2\_ d2py5a2\_ dl1d5aa2\_ dl1k8ka2\_ dl1k8ka1\_ d3uleb1\_ d3i33a2  
d3i33a1\_ dl1bupa1\_ dl1dkgd2\_ dl1dkgd1\_ d4ci6a2\_ dl1jcfa1\_ d4a2ba2\_ d2fxua1  
dl1yaga2\_ dl1yaga1\_ d4cbua2\_ dl1bupa2\_ dl1iqca2\_ dl1iqca1\_ dl1eb7a2\_ dl1eb7a1  
dl1nmla1\_ dl1nira1\_ dl1hroa\_ d4gedb\_ d3zooa\_ dl1mz4a\_ dl1gu2a\_ dl1f1fa\_  
dl1dvva\_ dl1c6ra\_ dl1c75a\_ dl1e29a\_ dl1gdva\_ dl1cnoa\_ dl1h32b\_ dl1co6a\_  
d2bh4x\_ d2aiua\_ d5cytr\_ dl1jdl1a\_ dl1i8oa\_ d2zboa\_ d3dmia\_ dl1ls9a\_  
dl1wvec\_ d2yk3a\_ d3ph2b\_ dl1dw0a\_ d5aura\_ dl1ql3a\_ dl1qn2a\_ dl1f1ca\_  
d2nqya\_ dl1h4ga\_ dl1oa2a\_ dl1olra\_ d3b7ma\_ d4h7ma1\_ d3wp3a\_ d2vgda\_  
dl1igoa\_ d3zsea\_ d2nlra\_ d3wx5a\_ dl1oa3a\_ dl1pvxa\_ dl1m4wa\_ dl1f5ja\_  
dl1oa4a\_ dl1ks5a\_ d4ixla1\_ dl1evsa\_ dl1cnt1\_ dl1pvhb\_ dl1z7ca\_ dl1huwa\_

d1bgea\_ d1rhga\_ d1f6fa\_ d1f45b\_ d1i1rb\_ dlaxia\_ dletea\_ d3tgxb\_  
d2z3qa1 d3qb1a\_ d1hula\_ d1m48a\_ d4nkqb\_ dleera\_ d1v7mv\_ d5e4ea\_  
d2o27a\_ d3b5ka\_ d2psma1 d4zf7a\_ d3uf5a\_ d4x51a\_ d1d9ca\_ d4ypgc1  
d3oq3a\_ d1lqsl\_ d1n1fa\_ d1lau1a\_ d1wu3i\_ d3bes1\_ d3ux9a\_ d1v8fa\_  
d2ejca\_ d3muea1 d1ihoa\_ d3q12a1 d2b71a\_ d3rbaa\_ d2qtra\_ d1nupa\_  
d3192a\_ d1f9aa\_ d1qjca\_ d2h29a\_ d1vlha\_ d1od6a\_ d1lw7a1 d1mrza2  
d4ruka\_ d2e17a\_ d1iq0a2 d1irxa2 d1r6ta2 d1ivsa4 d2cyba\_ d1rqga2  
d1j09a2 d2yxna\_ d1f7ua2 d1h3fa1 d1ffya3 d2g36a1 d1nzja\_ d1jila\_  
d1n3la\_ d1i6la\_ d1pfva2 d1h3na3 d3n9ia\_ d3sz3a1 d1m4la\_ d2bk7a\_  
d3fjua\_ d1z5ra1 d1kwma1 d1jqga1 d2c1ca1 d1tda\_ d1h8la2 d3sw2a\_  
d1moxc\_ d1dx5i3 d1edmb\_ d1autl2 d1autl1 d1nqlb\_ d1dval1 d1szba2  
d1kigl\_ d2y5fl\_ d1ijqa2 d1gk5a\_ d1g1sa2 d1xdtr\_ d1lmja2 d1lmja1  
d1nzia2 d2wphe\_ d1klil\_ d1pfxl2 d1pfxl1 d1p9ja\_ d1g1ta2 d1f7ea\_  
d4yzub\_ d2mgpa1 d1b9wa1 d1b9wa2 d2mgpa2 d1ob1c1 d1ob1c2 d1n1ia1  
d2npra2 d2npra1 d2y5ia\_ d1qlsa\_ d1psra\_ d3n22a\_ d2egda\_ d4ggfc\_  
d2wcea\_ d2luca\_ d4aqia\_ d3nsia\_ d2lp3a\_ d1j55a\_ d1a4pa\_ d1nsha\_  
d1pvaa\_ d3fs7a\_ d2pvba\_ d1ttxa\_ d1rwy\_ d2kyfa\_ d1rk9a\_ d1a75a\_  
d1exra\_ d1tiza1 d1nyaa\_ d1g8ia\_ d1wdcc\_ d3fwba\_ d1ggza\_ d2o5ga\_  
d1ctaa\_ d1m45a\_ d3i5gc\_ d1s18a\_ d1fpwa\_ d2scpa\_ d2roaa\_ d4agra\_  
d3pn7b\_ d1br1b\_ d2mysb\_ d1s6ca\_ d1bjfa\_ d2obha\_ d1jfka\_ d1jf0a\_  
d1qv0a\_ d1lkja\_ d2mlfc\_ d2m97a\_ d2d8na\_ d4by5a\_ d1jbaa\_ d4nqga\_  
d1wdcb\_ d2mysc\_ d1j7qa\_ d1s6ia\_ d1uhka2 d1r2ua\_ d1dtla\_ d3kf9a\_  
d3pn7c\_ d5d67d\_ d1tuza\_ d1h8ba\_ d1eg3a1 d1eg3a2 d2zkmx1 d1snla\_  
d1gjya\_ d1y1xa\_ d1hqva\_ d1df0a1 d1qxp2 d4usla\_ d1k94a\_ d1wkya2  
d1uuqa\_ d3wh9a\_ d4mlra\_ d1xyza\_ d4xuya\_ d2je8a5 d4bf7a1 d3cuia\_  
d1ur4a\_ d1odza\_ d2vzsa5 d1bqca\_ d2x2ya1 d1hjqa\_ d1qnra\_ d4y7ea1  
d1vjza\_ d4k68a\_ d2v3ga\_ d4hpga\_ d1nofa2 d1nq6a\_ d1h4pa\_ d1aq0a\_  
d3ziza\_ d4bs0a\_ d1ecea\_ d1h1na\_ d1ta3b\_ d1w91a2 d1i1wa\_ d1uhva2  
d1us3a2 d1egza\_ d7a3ha\_ d1tvna1 d3nyda1 d1ghsa\_ d2cyga1 d4xv0a\_  
d2c8na2 d1w32a\_ d3emca\_ d1v6ya1 d1foba\_ d2uwfa1 d2fgla\_ d3niya1  
d2c0ha1 d1rh9a1 d1yq2a5 d1szna2 d1fa2a\_ d1pama4 d5do8a1 d1ea9c3  
d1hx0a2 d2fhfa5 d1qhoa4 d1avaa2 d1m53a2 d4m8ua1 d2gjpa2 d1lwha2  
d4howa1 d1ktba2 d1j0ha3 d3vm5a1 d2x1ia\_ d1wzaa2 d1uasa2 d2diea1  
d1mxga2 d1ht6a2 d1eswa\_ d5cpsa\_ d1ud2a2 d1zjaa1 d3gbea1 d1kwga2  
d1wdpa\_ d1gcya2 d1g5aa2 d1hvxa2 d3dhpa2 d2bhua3 d4do4a1 d3qgva1  
d1e43a2 d1g94a2 d2d3na2 d1gjwa2 d1gvia3 d1x1na1 d1r7aa2 d1tz7a1  
d4toqa\_ d1wb0a1 d1w9pa1 d1itxa1 d1kfwal d1goia2 d1edqa2 d2gsja\_  
d1hjxa1 d1jnda1 d1vf8a1 d3wdpp1 d3wq5a\_ d1gnxa\_ d4gxp2 d4hz8a\_  
d1e4mm\_ d3aiua\_ d1wcga1 d1qvba\_ d3ahxa\_ d1v02a\_ d2dgaa\_ d1pbga\_  
d1vffa1 d1qoxa\_ d4ha4a\_ d1mixa2 d1e5wa2 d1j19a2 d1isna2 d2a16b2  
d1g4ma1 d1g4ma2 d1eh3a\_ d3skpa\_ d1dtza1 d1dtza2 d1jnfa2 d1ce2a1  
d1jnfa1 d1b1xa2 d1b1xa1 d1jw1a1 d1jw1a2 d1ryoa\_ d1h76a1 d1h76a2  
d1iuka\_ d2csua1 d3q9ub\_ d2yv1a1 d3q9na\_ d2d59a\_ d1oi7a1 d2yv2a1  
d1y81a1 d1wgqa1 d1v89a1 d2coda1 d1zc3b\_ d1wg7a1 d1u5ea1 d1v61a1

d2coca1 d2ys1a1 d1v5pa1 d1ntya2 d1wjma1 d1wila1 d1u29a\_ d1xx0a1  
d1unqa\_ d2zkmx3 d1fhoa\_ d1v88a1 d2adza1 d1x1fa1 d1p6sa\_ d2coaa1  
d1btka\_ d1v5ma1 d1faoa\_ d2x18a\_ d1dyna\_ d1x1ga1 d4kaxb\_ d2j59m1  
d1kilb2 d1xcga2 d1txda2 d1u5da1 d1dbha2 d1w1ha\_ d1upqa\_ d1v5ua1  
d1foea2 d2fjla1 d1eaza\_ d2dfka2 d2cofa1 d1kz7a2 d1h6ua1 d9ldta1  
d2ewda3 d1up7a1 d2dfda1 d1s6ya1 d1vjta1 d7mdha1 d1hyea1 d1t2da1  
d1oj3a3 d1b8pa1 d1ldna1 d1hyha1 d1civa1 d2a92a1 d1ez4a1 d1i0za1  
d1y6ja1 d1gv0a1 d1ur5a1 d1l1da1 d1lobba1 d1v8ba1 d1gdha1 d2dlda1  
d1mx3a1 d1ygya1 d1qp8a1 d1li4a1 d1j4aa1 d2naca1 d1npya1 d3t4ea2  
d1a4ia1 d1o0sa1 d2hk9a2 d2egga2 d1b26a1 d1bvua1 d1gq2a1 d1c1da1  
d1leha1 d1gtma1 d1nvtal d3dona2 d1ledza1 d1gpja2 d1vi2a1 d1p77a1  
d1nyta1 d1b0aa1 d1v16a1 d1v91a1 d1txga2 d3f47a1 d1mv8a2 d2pv7a2  
d1xc2a3 d2ahra2 d4xiya1 d2f1ka2 d1pgja2 d1np3a2 d1l1j8a4 d1teaa3  
d1qmg2 d2i76a2 d2g5ca2 d1wdka3 d1d1ja2 d3cuma3 d1kola2 d1qora2  
d1jqba2 d1vj0a2 d1cdoa2 d1gu7a2 d1d1ta2 d1xa0a2 d2dm6a2 d1jvba2  
d1rjwa2 d1llua2 d1h2ba2 d1tt7a2 d1piwa2 d1o89a2 d1iz0a2 d1e3ja2  
d1yb5a2 d1uufa2 d1vj1a2 d1e3ia2 d3gpdg1 d1vc2a1 d2nvwal d1u8fo1  
d1ydwa1 d1hdgo1 d2g17a1 d1cf2o1 d2czca2 d1r0ka2 d1lobfo1 d2cvoal  
d1ebfa1 d1h6da1 d1i32a1 d1zh8a1 d2q49a1 d1qkia1 d1j5pa4 d3pzra1  
d1xeaa1 d1vkoa1 d1vm6a3 d3qvsa1 d2pkqo1 d1b7go1 d1gr0a1 d1p1ja1  
d1lc0a1 d3pwka1 d2hjsa1 d1zyao1 d1vkna1 d1tltal d1nvmbl d3sjua\_  
d3ojfa1 d1xu9a1 d2jjya1 d1n7ha\_ d1y1pa1 d1h5qa\_ d1jtva\_ d4fs3a\_  
d2bkaa1 d1gy8a\_ d2c5aa1 d1ulsa\_ d1ooea\_ d2b69a1 d1y5ma1 d1spxa\_  
d1bxka\_ d1ydea1 d1gega\_ d1hdoa\_ d1o5ia\_ d1e6ua\_ d1snya1 d2rhca\_  
d3zv4a\_ d5ceja\_ d2d1ya1 d1fjha\_ d3w8ea\_ d2fmua1 d1x1ta\_ d1rpna\_  
d3ay7a1 d1k2wa\_ d1eq2a\_ d2hrba1 d3ruaa\_ d2ew8a1 d4hwka\_ d1xgka\_  
d2bd0a1 d1yo6a1 d2a35a1 d2ntva\_ d1vl8a\_ d1hdca\_ d4bkua\_ d2ag5a1  
d2q45a\_ d1nffa\_ d4iy1a\_ d1zbqa1 d1kewa\_ d1ek6a\_ d1ja9a\_ d2q46a2  
d1iy8a\_ d1cyda\_ d2ptga\_ d1hxha\_ d1uzma1 d3lyla\_ d4m89a\_ d3wyea\_  
d2b1la1 d1w6ua\_ d1sb8a\_ d2q2va\_ d4nr0a\_ d1e6wa\_ d2gasa\_ d3oiga1  
d2bgka1 d1mxha\_ d1vl0a1 d1rkxa\_ d1r6da\_ d1wmaa1 d1e7wa\_ d2c07a1  
d1xkqa\_ d3tzha\_ d1g0oa\_ d3lz6a\_ d1qyca\_ d1ledoa\_ d1gz6a\_ d1oc2a\_  
d1t2aa\_ d1zema1 d2xoxa\_ d1z45a2 d1geea\_ d1p33a\_ d3lt0a\_ d4e6pa\_  
d2wyua\_ d1db3a\_ d4q9na\_ d1xhla\_ d4o1ma\_ d1fmca\_ d2uvda\_ d2gdza1  
d1uaya\_ d2z1ma\_ d2o23a2 d2fr1a2 d2fr1a1 d1qsga\_ d1qyda\_ d4zjua\_  
d2a4ka1 d1yb1a\_ d1wvga1 d1yxma1 d3f4ba\_ d1mg5a\_ d1xg5a1 d1r55a1  
d3gboa\_ d1atla\_ d1kufa\_ d1buda\_ d4q1la\_ d1quaa\_ d1yp1a\_ d1wnia\_  
d3nqyb\_ d4gera\_ d1bqba\_ d1ex0a4 d2f4ma1 d1x3za\_ d2w0pa\_ d2diaa1  
d2e9ia2 d2e9ja1 d2dj4a1 d2eeba1 d2diba1 d2dmba1 d2dmca1 d2d7oa1  
d2ee6a1 d2d7pa1 d2eeaa1 d2di8a1 d1wlha1 d2d7na1 d2nqca\_ d2d7ma1  
d2dica1 d3cnka\_ d2k3ta1 d2eeca1 d1qfha1 d2bp3a1 d1v05a\_ d2ee9a1  
d2eeda1 d2di9a1 d1t3ca\_ d1epwa3 d2a97a\_ d3fiea\_ g1e1h.1 d3ioqa\_  
d1fh0a\_ d1o0ea\_ d1khqa\_ d1m6da\_ d2cb5a\_ g8pch.1 d1s4va\_ d2pnsa\_  
d1vsna1 d1mira\_ d1iwda\_ d2oula\_ d7pcka\_ d3bwka\_ d3bcna\_ d2p86a\_

d1pvja\_ d1pcia\_ d1gece\_ d1deua\_ d4bs6a\_ d1xkga1 d1cqda\_ d1jqpa2  
d2c0ya\_ d2bdza\_ d3p5ua\_ d2jk6a2 d2jk6a1 d1fecal d1fecal d1lpfa1  
d1lpfa2 d1xhca1 d1xhca2 d1dx1a2 d1dx1a1 d1gera2 d1m6ia2 d1onfa1  
d3lada2 d3lada1 d1w4xa1 d1w4xa2 d1gesa2 d1mo9a1 d1xdia1 d1fl2a2  
d1fl2a1 d1fcda1 d1fcda2 d1h6va2 d1h6va1 d1mo9a2 d1gv4a2 d1gv4a1  
d2gv8a2 d2gv8a1 d1aoga1 d1aoga2 d1hyua1 d1ebda1 d1ebda2 d3dk9a1  
d1qlra2 d1qlra1 d1gesa1 d1zbfal d2z1ha\_ d2etja1 d3qioa1 d1j11a\_  
d2e41a\_ d1j12a\_ d21sna1 d1io2a\_ d1uaxa\_ d2yv0x\_ d1mu2a1 d1ekea\_  
d1i39a\_ d1pn0a1 d1reoal d1ju2a1 d2f5va1 d3c96a1 d2gmha1 d1pj5a2  
d1gpea1 d1o5wa1 d1n4wa1 d1k0ia1 d2dw4a2 d2ivda1 d2voua1 d1kdga1  
d1s5ja1 d2hbja2 d2igia\_ d1wlja\_ d1qhta1 d4dlea1 d1tgoa1 d2f96a1  
d3tr8a1 d3mxma\_ d1q8ia1 d1y97a1 d1w0ha\_ d1kfsa1 d2py5a1 d1noya\_  
d1d5aa1 d1yt3a3 d2guia\_ d3mwpal d4kb1a\_ d2y8ga\_ d1xkea1 d2y8fa\_  
d2v76a\_ d1wj1a1 d1aqca\_ d1qqga1 d1ntva\_ d1n3ha\_ d4dbba\_ d3f0wa1  
d1p3ra\_ d1wgua1 d2cy4a1 d3hqca\_ d1wvha1 d1xr0b1 d2av4a1 d3nvva1  
d1krha3 d2h88b1 d1n62a2 d1t3qa2 d1kf6b2 d1zoyb1 d1jq4a\_ d1dgja2  
d1rm6c2 d1r7ha\_ d1faaa\_ d1wika1 d1xfla\_ d1ttza1 d2f51a1 d1ti3a\_  
d1nhoa\_ d1sena\_ d2i4aa\_ d1ep7a\_ d1zmaa1 d1fo5a\_ d3lefa1 d3diea1  
d2yana1 d1z6na1 d1oaza\_ d3zywa1 d4aj8a\_ d1nm3a1 d4fiwa\_ d1wmja\_  
d4hs1a1 d1iloa\_ d1xwaa1 d1wjka1 d2vm1a\_ d1fb6a\_ d1gh2a\_ d1h75a\_  
d1nw2a\_ d1kx5b\_ d3a6na\_ d4m6ba2 d2nqbd\_ d3wkjd\_ d2yfwe\_ d4h9na\_  
d5bnxa\_ d1kx5c\_ d3r45a\_ d1eqzb\_ d4jjnb\_ d1f66c\_ d1eqza\_ d4wnnb\_  
d1kx5a\_ d1u35c1 d1id3a\_ d2nqbc\_ d1kx5d\_ d1tafa\_ d1bh9b\_ d1jfib\_  
d1q9ca\_ d1h3ob\_ d2byka1 d1n1ja\_ d4g92b\_ d1bh9a\_ d1jfia\_ d1h3oa\_  
d2bykb1 d1n1jb\_ d1pd212 d1nhya2 d2a2ra2 d1k0dd2 d1f2ea2 d1gsua2  
d1f3ba2 d2fhea2 d2pvqa1 d1tw9a2 d1oyja2 d1k0ma2 d3ik7a1 d4is0a1  
d1r5aa2 d1jlva2 d1m0ua2 d3gtub2 d1z9ha2 d1okta2 d1axda2 d2gsra2  
d1tu7a2 d1k3ya2 d1zgma1 d1b48a2 d1gnwa2 d1gwca2 d2gsta2 d1glqa2  
d1oe8a2 d1pn9a2 d1v2aa2 d1fw1a2 d1duga2 d2m9wa1 d3dfxa\_ d1lig8a1  
d1czan2 d1czan3 d1czan1 d1ig8a2 d1czan4 d1bg3a3 d1bg3a2 d1bg3a1  
d1qqya\_ d1gd6a\_ d1f6ra\_ d1livma\_ d2gv0a\_ d1iiza\_ d2z2fa\_ d1j8xa\_  
d1gh1a\_ d1b9oa\_ d1741a\_ d1691a\_ d2o4wa\_ d1p37a\_ d1k28a3 d1xjta1  
d1jtma\_ d2f2qa\_ d4e97a1 d3w3ea\_ d4tx7a\_ d3cqla\_ d4msta\_ d3iwra\_  
d1dxja\_ d2z37a\_ d4dyga\_ d2pjsa1 d2i7ra1 d1ecsa\_ d1xqaa1 d5cj3a1  
d1npba\_ d1jifa\_ d2p7oa\_ d1r9ca\_ d1nkia\_ d1mpya2 d1kw3b2 d1kw3b1  
d4ghga1 d1tfza1 d3isqa1 d3isqa2 d1sqia1 d1sqia2 d1lkda2 d1lkda1  
d1mpya1 d1cjxa1 d1sp9b2 d1t47a1 d1t47a2 d1flua2 d1sp8a1 d1sp8a2  
d1flua1 d1etob\_ d1lumqa\_ d1g2ha\_ d1pv8a\_ d1w5qa\_ d2c1ha\_ d1l6sa\_  
d1qsta\_ d2beial d4m3sa\_ d1u6ma1 d1ygha\_ d1yk3a1 d3dr6a\_ d1xmta\_  
d1z4ea1 d2ge3a1 d1bo4a\_ d2fiaa1 d2jdca1 d1y9wa1 d3to7a\_ d1wwza1  
d2f14a1 d2ozua1 d2b5ga\_ d2cy2a1 d2p0wa\_ d1cm0a\_ d4pswa\_ d1yrea1  
d1yr0a1 d1m4ia\_ d2gana1 d1yvka1 d1ghea\_ d2g3aa1 d1y7ra1 d2euia1  
d1q2ya\_ d2fsra1 d1xeba\_ d2ae6a1 d1cjwa\_ d1qsma\_ d2aj6a1 d1y9ka1  
d1i12a\_ d1vkca\_ d2atra1 d1n71a\_ d2d4pa1 d2fiwa1 d2fe7a1 d1tiqa1

d2ou2a\_ d1yx0a1 d2fcka1 d1p0ha\_ d2j8ma\_ d2pq8a\_ d1z4ra1 d1s3za1  
d1ufha\_ d1xvqa1 d1pn0a2 d3hy2a\_ d2cvba1 d1o8xa\_ d1lu4a\_ d1we0a1  
d2bmxal d2a4va1 d1psqa\_ d1xiya1 d1q98a\_ d1n8ja\_ d1zofa1 d2ggta\_  
d3tjja\_ d4je1a1 d1o73a\_ d3s9fa\_ d2zcta\_ d1qmva\_ d1jfua\_ d2b1ka\_  
d5dvba1 d2b5xa1 d2v2ga\_ d1st9a\_ d3tb2a\_ d4llra\_ d4fh8a1 d1e2ya\_  
d1knga\_ d2h30a\_ d1i5ga\_ d2z9sa\_ d2f8aa1 d1tp9a1 d2b7ka\_ d1nm3a2  
d3hvva\_ d2wfca1 d4kcea\_ d1xvwa1 d4gqca1 d3qpma\_ d4k1fa\_ d1zsoa1  
d1gp1a\_ d1prxa\_ d4od7a1 d1z6ma1 d4mcua1 d4dvca1 d3l9sa\_ d1un2a\_  
d3rppa\_ d3kasa1 d3bi1a3 d1e88a1 d1l6ja5 d1l6ja4 d1eaka4 d1eaka3  
d1h8pa2 d1h8pa1 d1jgta2 d1ea0a3 d1ecfa2 d1q15a2 d1ct9a2 d1ao0a2  
d1te5a\_ d1ys1x\_ d4hs9a\_ d1ispa\_ d1ex9a\_ d1ku0a\_ d3qmma\_ d1ra6a\_  
d3gsza\_ d1khva\_ d1te9a\_ d2xwha\_ d3uqsa\_ d3hkwa\_ d3n6ma\_ d2cjqa\_  
d2xyma\_ d1teba\_ d1te8a\_ d1s48a\_ d1u09a1 d4wfxa\_ d3tyqa\_ d2pgga1  
d1dgsa2 d1fvial d1p16a1 d1x9na2 d1lgya\_ d4l3wa\_ d1l1fa\_ d1gz7a\_  
d1ukca\_ d2ftba\_ d1pmpa\_ d2rcqa1 d1fdqa\_ d4lkpa\_ d1sa8a\_ d1vyfa\_  
d1lpja\_ d3vg7a1 d4azqa1 d1o8va\_ d5bvqa\_ d1p6pa\_ d2qo4a\_ d1opba\_  
d1yiva1 d1o1va\_ d4bvma1 d4tkba\_ d4i3ba\_ d1bwya\_ d1ftpa\_ d1ggla\_  
d4gkca\_ d1cbia\_ d3p6da1 d1kqwa\_ d2a0aa1 d3zxha\_ d1cgla\_ d1rm8a\_  
d1eaka2 d1hy7a\_ d2jsda\_ d1cxva\_ d1hv5a\_ d1i76a\_ d3p0ya1 d1igra1  
d1igra2 d1n8yc2 d1n8yc1 d1m6ba2 d1m6ba1 d1sr9a2 d1rqba2 d1h6ta2  
d1lmra\_ d1cixa\_ d1y29a\_ d1v7fa\_ d2jtba\_ d1d1ha\_ d1g9pa\_ d1lupa\_  
d1qk7a\_ d1mb6a\_ d2a2va\_ d1niya\_ d1i25a\_ d1hvwa\_ d2mpqa\_ d1ie6a\_  
d1kqha\_ d1la4a\_ d2mxoa1 d1d10a\_ d1koza\_ d1qk6a\_ d1emxa\_ d1lqra\_  
d1c6wa\_ d1rypd\_ d1irua\_ d1rypc\_ d3unfk\_ d1rypa\_ d1j2pa\_ d1irui\_  
d1j2qh\_ d3unfh\_ d1m4ya\_ d1rypb\_ d1irul\_ d1irug\_ d1iru2\_ d1rypg\_  
d1g3ka\_ d1iruf\_ d1q5qa\_ d1e94a\_ d1irub\_ d1ryph\_ d3ty6a\_ d1iruj\_  
d1iruk\_ d1rype\_ d1irud\_ d1irue\_ d3mi01\_ d1rypf\_ d1iruh\_ d2z3ba\_  
d1iruc\_ d3mka2\_ d1irul\_ d1ny721 d1ny722 d1a6ca3 d1a6ca2 d1pgl22  
d1pgl21 d1pgl11 d1ny711 d1mqta\_ d1d4m3\_ d1fmd3\_ d2mev1\_ glaym.1  
d1ev13\_ d4q4w1\_ d1r1a3\_ d2x5ia\_ d1rhi1\_ g1r1a.1 g1d4m.1 g1rhi.1  
d1b35b\_ d1loopa\_ d1tme1\_ d4iv1a\_ g1pvc.1 g1fpn.1 d1fpn1\_ d4gb31\_  
d1d4m1\_ d1fmd1\_ d1ev11\_ d2wzr3\_ g1cov.1 d1qqp3\_ g1fmd.1 d2x5ic\_  
d1rhi3\_ g1oop.1 d1hxs1\_ g1hxs.1 d1fpn3\_ g2mev.1 d1eah3\_ d1aym1\_  
d1pvc3\_ d1qqp1\_ d1zba3\_ d1h8ta\_ d3vbhc\_ g1b35.1 g1bev.1 d1hxs3\_  
g1ev1.1 d1bev3\_ g1tmf.1 d1tmf1\_ d1b35a\_ d2mev3\_ g1eah.1 g1h8t.1  
d1eah1\_ d4q4w3\_ d1r1a1\_ d1aym3\_ d1pvc1\_ d1zba1\_ d1h8tc\_ d1oopc\_  
d1tme3\_ g1qqp.1 d4iv1c\_ g1tme.1 d1ju8a\_ d4lt9a1 d3tc7a1 d3hoja\_  
d1i4na\_ d3vnda\_ d3n18a1 d1geqa\_ d3nava1 d1v5xa\_ d4a2ra1 d3tc6a1  
d1ujpa\_ d4ijba\_ d1xcfa\_ d1vc4a\_ d1rd5a\_ d1qopa\_ d3b5va\_ d2r80b\_  
d1cqxa1 d1cg5a\_ d1gcvb\_ d3boma\_ d2h8fb\_ d2raoa\_ d3bj1a\_ d4hrrb\_  
d2r50a\_ d3d1kb\_ d2aa1b1 d3zhwa\_ d3hf4b\_ d3gdja\_ d1jebb\_ d3bj1b\_  
d1x9fb\_ d1wmub\_ d1gcva\_ d3bcqb\_ d3d4xb\_ d1gvha1 d2dc3a\_ d3hf4a\_  
d4yu3a\_ d3k8ba\_ d1qpwb\_ d2r80a\_ d3bcqa\_ d1v4wa\_ d3wtgb\_ d1j17a\_  
d4esaa\_ d1a9we\_ d3d1ab\_ d1fsla\_ d4h21a\_ d1v4wb\_ d1mwca\_ d1vhba\_

d1jeba\_ d1spgb\_ d1h97a\_ d1q1fa\_ d1tu9a1 d3d1aa\_ d1hdsb\_ d3hyub\_  
d2zfb\_ d3fs4a\_ d1oj6a\_ d1shrb\_ d4h21b\_ d4yu3b\_ d1spga\_ d3hrwa\_  
d3qqra\_ d3at5a\_ d4wchd\_ d3hyua\_ d1cg5b\_ d1uc3a\_ d1hbra\_ d2raob\_  
d1outb\_ d4esab\_ d3gdjb\_ d3qqqa\_ d1x9fc\_ d3vrfa\_ d1litha\_ d3mkba\_  
d3d4xa\_ d3mjpa\_ d1j16a\_ d3fh9a\_ d1outa\_ d2dc3b\_ d1lit2a\_ d3eoka\_  
d3g46a\_ d1qpwa\_ d3vrfb\_ d1ch4a\_ d1x9fd\_ d1hdsa\_ d2zfa\_ d3mkbb\_  
d1or4a\_ d3wtga\_ d1a4fa\_ d3fh9b\_ d3bomb\_ d3cy5a\_ d3at5b\_ d1x9fa\_  
d2oifa\_ d4lmb\_ d1cpcb\_ d3v57a\_ d1kn1a\_ d1cpca\_ d4f0ta\_ d2vjha\_  
d4po5b\_ d1eyxa\_ d1alla\_ d4f0tb\_ d1b33b\_ d1b8db\_ d4h0mb\_ d1b33a\_  
d2vjhb\_ d4lm6b\_ d2vmlb\_ d1a11b\_ d2vjta\_ d3dbja\_ d2vmla\_ d2vjtb\_  
d4f0ub\_ d1f99b\_ d4rmpa1 d1lliaa\_ d1eyxb\_ d2uulb\_ d4lmsb\_ d4f0ua\_  
d2bv8a\_ d1f99a\_ d2bv8b\_ d2c71b\_ d3dbjb\_ d4rmpb1 d1b8da\_ d4h0ma\_  
d3v57b\_ d1kn1b\_ d2uula\_ d2j96a\_ d1kyqa1 g1gxs.1 d1azwa\_ d1mtza\_  
d2xqfa\_ d1ea5a\_ d1f6wa\_ d1dx4a\_ d1qe3a\_ d1k4ya\_ d4qwwa\_ d2ha2a\_  
d1r88a\_ d1sfra\_ d4qeka\_ d3c8da2 d2pbla1 d1jkma\_ d1jjia\_ d1lzla\_  
d2m5ta\_ d1wqsa\_ d5bpea\_ d2ipha\_ d1lvoa\_ d2bhga1 d3tnta\_ d3sjia\_  
d3d23a1 d2fyqa\_ d3tloa\_ d3zvea1 d2hrva\_ d3q3ya1 d4asha1 d1jmx3  
d1pbya3 d1pbya4 d1b9ra\_ d1offa\_ d1frra\_ d3wcqa\_ d1e9ma\_ d1l5pa\_  
d1wria\_ d1i7ha\_ d3av8a\_ d1rfka\_ d3plma1 d3b2ga\_ d2bt6a2 d4iu3a3  
d4bvva\_ d5hpga\_ d3k65a\_ d1ki0a3 d1ki0a2 d1ki0a1 d1a0ha1 d1pmla\_  
d3sp8a3 d2feba1 d1f74a\_ d3l21a\_ d2e1da\_ d1to3a1 d1w3ia\_ d1sfla\_  
d1n7ka\_ d1vcva1 d4imea\_ d1wa3a\_ d2ocza1 d1f2ja\_ d3m16a\_ d2yxga\_  
d1ub3a\_ d3a5fa\_ d1fbaa\_ d1l6wa\_ d1xfba1 d1wx0a1 d1vpxa1 d1ojxa\_  
d1mxsa\_ d2a4aa1 d1xkya1 d3cq0a1 d3s1xa\_ d1f05a\_ d1fdja\_ d3cpra1  
d4d2ja\_ d4mh8a\_ d1mu2a2 d4i7ga1 d3rp2a\_ g1lucy.1 d1fuja\_ d2zchp\_  
d3w94a\_ d1si5h\_ d1lo6a\_ g2pka.1 d1cgha\_ d1kigh\_ d1a5ia\_ d3s9ba\_  
d1hj8a\_ d1ao5a\_ d2anya\_ d1q3xa1 d1gvza\_ d1azza\_ d4gsoa\_ d2f91a1  
d1iaua\_ d1gdna\_ d1eufa\_ g1fiw.1 d1eq9a\_ d4nfea\_ d2rdla\_ d1spja\_  
d1elva1 d1a7sa\_ d1ekbb\_ d1pfxc\_ d1yc0a\_ d2aiqa\_ g1fiz.1 d1fi8a\_  
d4k60a\_ d4dgja\_ d1mzaa\_ d1op0a\_ d3tjva\_ d1pytd\_ d1sgfg\_ g1gg6.1  
d2eeka\_ g1rtf.1 d1a0ja\_ d3g01a\_ d1pytc\_ d4e7na\_ d1ddja\_ d1z8ga1  
d2hlca\_ d1npma\_ d1brup\_ g1jou.1 d1sgfa\_ d1autc\_ g2hnt.1 g1kdq.1  
d1orfa\_ d3s69a\_ d4crga\_ d1fxya\_ d1bqya\_ d1svpa\_ d1mbma\_ d3su6a1  
d1cula1 d4agka\_ d1vcpa\_ d1q31a\_ g1n11.1 d3e90b\_ d1ep5a\_ d3u1jb\_  
d1dzka\_ d4tlja\_ d2a2ua\_ d4wfva\_ d3t1da\_ d4iaxa\_ d3zq3a\_ d2nnda\_  
d1i4ua\_ d1kxo\_ d1bbpa\_ d1kt7a\_ d1exsa\_ d3s26a1 d1lf7a\_ d1qfta\_  
d4gh7a\_ d1z24a1 d1qabe\_ d1xkia\_ d1ew3a\_ d3bx7a\_ d4iawa1 d1n0sa\_  
d3kzaa\_ d2k23a\_ d2l9ca1 d2joza1 d1gm6a\_ d3kffa\_ d3saoa1 d1e5pa\_  
d1yupa1 d1iiua\_ d1e69a\_ d1mv5a\_ d3g60a4 g1ii8.1 d1ewqa2 d1ji0a\_  
d1qhla\_ d1v43a3 d2wmfa1 d1vpla\_ d1g2912 d4a82a2 g1f2t.1 d2d62a1  
d3tuic1 d2bbsa1 d3g60a3 d2ixea\_ d1g6ha\_ d1sgwa1 d2qi9c\_ d3rlfa1  
d3b60a1 d3d31a2 d2pzea1 g1xew.1 d1jj7a\_ d1oxk2 d2onka1 d1wlwa\_  
d1iwea\_ d1qf5a\_ d1vmaa2 d1nija1 d1np6a\_ d2p67a1 d3ihla\_ d1okkd2  
d1s1ma2 d1liona\_ d2v40a\_ d1dj3a\_ d3hida\_ d2vo1a1 d2g0ta1 d1vcoa2

d1j8mf2 d1g3qa\_ d1xjca\_ d1p9ba\_ d1qzxa3 d1ihua2 d1ihua1 d2qm8a\_  
d1dj2a\_ d4ioja\_ d1cp2a\_ d1yrba2 d1hyqa\_ d3gqba2 d1skye3 d1xp8a1  
d1tf7a2 d1tf7a1 d1ye8a1 d1skyb3 d2qe7d2 d4blta\_ d4huta\_ d31daa2  
d4hyya\_ d2i3ba1 d1cr1a\_ d3j9tb2 d3ntua2 d1vdza1 d2z43a\_ d1e9ra\_  
d1nlfa\_ d3ziaa2 d1n0wa\_ d1g6oa\_ d3ziad2 d3j9ta2 d1pzna2 d3gqbb2  
d2i49a\_ d1nnfa\_ d1xvxa\_ d1ursa\_ d1h3da1 d1iuda\_ d4mlva1 d1twya\_  
d3e13x\_ d2nxoa1 d4pfua\_ d3ttma\_ d1elja\_ d2qmwa1 d1us5a\_ d1y3na1  
d1jeta\_ d1uqwa\_ d4f19a1 d2esna2 d3thia\_ d3fasa1 d2uyeb\_ d2xwva1  
d1r9la\_ d2fyia1 d2ozza1 d1sw5a\_ d1nh8a1 d1vr5a1 d2g29a\_ d1xs5a\_  
d31swa\_ d2z23a\_ d3w9va\_ d3tcha\_ d1q35a\_ d1z7me1 d3q27a\_ d1p99a\_  
d1ve4a1 d2i6ea1 d4mcoa1 d4n8ya\_ d1eu8a\_ d1zbma1 d1hsla\_ d1ixca2  
d1j1na\_ d1xvya\_ d1y9ua\_ d2z22a1 d1xoca1 d4oera\_ d1wdna\_ d5f1qa1  
d1xt8a1 d1i6aa\_ d4gwoa\_ d4igta1 d1pc3a\_ d4mmpa1 d1o63a\_ d2cz1a1  
d2onsa2 d4mija1 d1g8fa3 d1c4oa1 d2p6ra3 d2p6ra4 d1oywa2 d1oywa3  
d1wrba1 d1w36b2 d1w36b1 d1c4oa2 d3bora\_ d1t6na\_ d2eyqa5 d2eyqa3  
d2eyqa2 d2zu6a2 d1veca\_ d1uaaa1 d1w36d1 d2g9na1 d1z3ix2 d2rb4a\_  
d1hv8a1 d1hv8a2 d1t5ia\_ d1w36c2 d2j0sa2 d2j0sa1 d1fuka\_ d3hjha1  
d1z5za1 d1qdea\_ d1z63a1 d1s2ma2 d1s2ma1 d1wp9a1 d1wp9a2 d1gm5a3  
d1gm5a4 d3dina4 d3dina3 d1q0ua\_ d1w36c1 d1z3ix1 d1nkta3 d1nkta4  
d1uaaa2 d1w36d2 g1qhh.1 d2fwra2 d2fwra1 d3q3ma\_ d1za0a1 d1mxra\_  
d2inca\_ d1jk0a\_ d2incb\_ d1mhyb\_ d3hflb\_ d1mtyb\_ d1r2fa\_ d2uw1a\_  
d1mhyd\_ d3n37a\_ d1afra\_ d1syya\_ d1mtyd\_ d2o1za\_ d1uzra\_ d1smsa\_  
d2fkza\_ d1zuja1 d1s3qa1 d2fjca1 d1z6om1 d1veia\_ d4dyya\_ d1jiga\_  
d3gvya\_ d2pyba\_ d4cy9a1 d3bvfa1 d1r03a\_ d2cf7a\_ d1nf4a\_ d1zs3a1  
d4iwka\_ d3ka8a\_ d3np0x\_ d1n1qa\_ d1l1b3a\_ d4e6ka\_ d1z6oa1 d2fzfa1  
d4dyua\_ d3ge4a\_ d1jgca\_ d4am4a\_ d2z6ma\_ d1ji5a\_ d1vlga\_ d1lkoal  
d1krqa\_ d3qz3a\_ d1o9ra\_ d2ffxj\_ d1euma\_ d1yv1a1 d2v2pa\_ d1j30a\_  
d4di0a\_ d1dpsa\_ d2cbia2 d1gqia1 d2choa2 d1oewa\_ d2qzxa\_ d2asia\_  
d1psoe\_ d1smra\_ d2h6ta\_ d1pfza\_ d1izda\_ d3hd8a\_ d1j71a\_ d1dpja\_  
d4aa9a\_ d1t6ex\_ g1b5f.1 g1lya.1 g1htr.1 d1qdma2 d1bxoa\_ d1wkra\_  
d1tzsa\_ d1libqa\_ d2qzwa\_ d1bdqa\_ d3ggta\_ d3ixoa\_ d1mrxa\_ d2haha\_  
d1tw7a\_ d4njsa\_ d1sgua\_ d2p3da\_ d1nsoa\_ d3d3ta\_ d2rkfa\_ d1c6ya\_  
d2rspa\_ d3ogpa\_ d3ekwa\_ d2o4na\_ d2j9ja\_ d1baia\_ d3ggua\_ d3lzua\_  
d4npua\_ d4j55a\_ d2r8na\_ d2fxda\_ d2p3ca\_ d4dqa\_ d3ttpa\_ d3t3ca\_  
d2p3aa\_ d2hc0a\_ d2fdda\_ d3mwsa\_ d1h4ra3 d4yl8a1 d2al6a3 d1wgda1  
d1wggal d4q5eb\_ d1wjna1 d1se9a\_ d3n3kb\_ d1wz0a1 d1we6a1 d2m0xa\_  
d2gbka\_ d3rt3b1 d1wh3a1 d1sifa\_ d2ekek2 d4ii2b1 d4hk2a1 d1c3ta\_  
d1m94a\_ d1wgha1 d1ttna1 d1j8ca\_ d1wx8a1 d3v6cb1 d2ma9b\_ d4i6lb1  
d1bt0a\_ d2jvca1 d1iyfa\_ d2k1fa\_ d1wxva1 d1wf9a1 d1t0ya\_ d2io0b2  
d1x1ma1 d2gbma\_ d1zw7a1 d2m17a\_ d1ud7a\_ d1we7a1 d2lwp\_ d2gbja\_  
d1wjua1 d1v6ea1 d1v86a1 d4eewa\_ d1wiaa1 d4icva\_ d4gu2a\_ d1wx7a1  
d1wy8a1 d4hjka1 d2faza1 d1v5oa1 d2al3a1 d2cr5a1 d1wj4a1 d1s3sg\_  
d1yvca1 d1yeza1 d1dszb\_ d1a6ya\_ d3cbba\_ d1ynwa1 d1r4ia\_ d1hcqa\_  
d2hana\_ d2hanb\_ d2enva1 d1kb4b\_ d2n11b\_ d1l01a\_ d1cita\_ d1lum8a\_

d1qvra2 d1qvra3 d1qzma\_ d1sxjc2 d1jr3d2 d2p65a\_ d1l8qa2 d1g8pa\_  
d3hu3a3 d1sxjd2 d1njfa\_ d1in4a2 d1sxja2 d1tuea1 d2ce7a2 d1w5sa2  
d1sxjb2 d1d2na\_ d1ny5a2 d1ofha\_ d2gnoa2 d2a5yb3 d1fnna2 d1u0ja1  
d1lv7a\_ d1liqpa2 d2fnaa2 d1ixsb2 d4gita\_ d1sxje2 d1g41a\_ d2e3fa\_  
d1mm0a\_ d2e3ea\_ d2l1da\_ d2ny8x\_ d2e3ga\_ d2ny9x\_ d2nz3a\_ d2k4ua\_  
d1hp2a\_ d2lu9a\_ d1baha\_ d2meoa1 d1wm7a\_ d1hlya\_ d1n8ma\_ d1jlza\_  
d1wpda\_ d1c55a\_ d1pvza\_ d1wt7a\_ d1wz5a\_ d1m2sa\_ d1pjva\_ d1c49a\_  
d1qkya\_ d2ktca1 d1wmta\_ d1du9a\_ d1j5ja\_ d1r1ga\_ d1t0za\_ d2i61a\_  
d1t1ta\_ d1sn4a\_ d1kv0a\_ d2lkba\_ d1npia\_ d1wwna\_ d1pe4a\_ d2kbka\_  
d2li7a\_ d1djta\_ d2kbha\_ d1dq7a\_ d1sega\_ d1omya\_ d1zywa1 d1jzaa\_  
d1n9wa1 d1bbua1 d1c0aa1 d1b8aa1 d1l0wa1 d3a74a1 d1eova1 d1iyjb4  
d1iyjb3 d1o7ia\_ d4ipca1 d1x3ea\_ d4apva\_ d1jb7a1 d1jb7a2 d1jb7a3  
d3kdfa\_ d1ue1b\_ d1wjja1 d3eiva\_ d1xjva2 d1xjva1 d2ccza2 d1se8a\_  
d1l1oc\_ d1jb7b\_ d1qvca\_ d3ulla\_ d1qzga\_ d1miua4 d1miua5 d1miua3  
d1y14b1 d2nn6i1 d1i94l\_ d2zjra2 d1smxa\_ d2qamc2 d1hh2p1 d2r7da1  
d1r12a2 d1wfga1 d3bzka4 d1x6oa2 d3a0ja\_ d2j01d2 d2ja9a1 d4q15a\_  
d1hr0w\_ d1luza\_ d2n3sa\_ d2vnud1 d1h95a\_ d1go3e1 d2nn6h1 d1ne3a\_  
d2mo1a\_ d1liz6a2 d1jjga\_ d1e3pa2 d2ix0a3 d2ix0a2 d2lxja\_ d1ueba3  
d1ueba2 d2z0sa1 d1u0la1 d2ix0a1 d2eifa2 d2je6i1 d3i2za1 d2c35b1  
d2ahob2 d1t9ha1 d3i4oa\_ d2qall1 d1jt8a\_ d2nn6g1 d1g6pa\_ d3cama\_  
d1i94q\_ d1c9oa\_ d1d7qa\_ d2ba0a1 d2vnud2 d2vnud3 d1khia2 d2qalq1  
d1wi5a1 d1xtda2 d1prtc2 d1pfsa\_ d2a1ka\_ d1ohea1 d1ohea2 d2f4da\_  
d1rxda\_ d2hxpa\_ d1xria\_ d1d5ra2 d1fpza\_ d3ezza\_ d4y2ea\_ d1i9sa\_  
d1k9ua\_ d2opoa\_ d3azya\_ d3wvja\_ d1upsa1 d1ajoa\_ d2hyka\_ d1ajka\_  
d2vy0a\_ d1o4ya\_ d3o5sa\_ d3d6ea\_ d3atga\_ d1dypa\_ d1lumza\_ d3i4ia\_  
d1c1la\_ d4lbqa\_ d1a78a\_ d1slta\_ d4no4a\_ d3zsja\_ d3duia\_ d1g86a\_  
d1qmja\_ d1hlca\_ d1tdha3 d1q3ba3 d1k82a3 g1qmo.1 g1len.1 d3zyra\_  
d1fnya\_ d1n47a\_ g2ltn.1 d1avba\_ d3usua\_ d1dhkb\_ d1f9ka\_ d1ukga\_  
d1g8wa\_ d1g9fa\_ d1wbfa\_ d3wcsa\_ d1g7ya\_ g1loe.1 d1mvqa\_ d1hq1a\_  
d1v6ia\_ d1dbna\_ d1qnwa\_ d1fx5a\_ d4l8qa\_ d3n35a\_ d2h0ba\_ d2erfa\_  
d1h30a2 d1h30a1 d3mw4a1 d1pz7a\_ d2r1ba\_ d3v64a1 d1d2sa\_ d3bopa1  
d3mw3a1 d1okqa1 d1okqa2 d1wioa4 d1ccza2 d1vcaa1 d1dr9a2 d1lic1a1  
d2d9qb1 d2nxyb2 d1adqa1 d1fnga1 d1uvqb1 d1zs8a1 d2vola1 d2vola2  
d1mfb12 d2jelh2 d1uwel2 d3qq4b1 d1kjvb\_ d1k5na1 d1osph2 d4odh12  
d1ow0a1 d1ow0a2 d1bfob2 d3l9ra2 d3jtth1 d2fath2 d4elkb2 d1fn4b2  
d2xfxb\_ d1pg7x2 d1cqka\_ d4k71b2 d1lk2a1 d1leapb2 d4lfhg2 d1i4fa1  
d2nw2a2 d1kfah2 d1mhca1 d1h3ua1 d1wejh2 d1h0db2 d1a5fh2 d1kcvh2  
d1mjuh2 d1qqda1 d1kcrh2 d1k8ia1 d3huja2 d2nnab1 d1nfd2 d3mffb2  
d1s9va1 d1lk3h2 d1q0xl2 d1fv1b1 d1neza1 d4rfeb2 d1r3ha1 d1a6tb2  
d1kjva1 d1pz5b2 d1onqa1 d2bc4a2 d1de4a1 d1k8da1 d1tcra2 d1dn0b2  
d1nfd2 d2xwtb2 d1bfoa2 d1mexh2 d1iakb1 d1ypzf2 d4f7ea2 d1q7212  
d2fbjh2 d1fe8h2 d1clzh2 d1fngb1 d1uvqa1 d1vgka1 d1c16a1 d4j12a2  
d4x99b2 d1igtb3 d1je6a1 d1q72h2 d1nldh2 d1teth2 d2hmic2 d1i1ca2  
d1i1ca1 d1k8ib1 d1q0yh2 d1kfa12 d3frua1 d1pg7w2 d1u58a1 d1igyb4



d1igyb3 d1hyrc1 d1klub1 d1deeb2 d1c12b2 d2bc4b2 d2ig2h2 d1kcvl2  
d3wn5b1 d1lk2b\_ d1lk3l2 d1mjul2 d1sm3h2 d1q0xh2 d1zvsal d1ydpal  
d1u8ib2 d1ypze2 d1kcu2 d1op9a\_ d1y0la1 d1etzb1 d1egjl1 d2gsib1  
d1nj9a1 d4jfhdl d1aqkl1 d1t2ja\_ d1lo4h1 d1zvya1 d3v4vl1 d4enec1  
d1kxtb\_ d5e8ea1 d2pxya\_ d4weud\_ d1xiwc\_ d2esvd1 d1qznh\_ d1ogae1  
d1f4xh1 d4n1hb\_ d3ezjb1 d3mlwl1 d1kfah1 d1etza1 d1b4jh1 d3cfic\_  
d4w68a\_ d2arja1 d1ek3a\_ d2ok0l1 d1vera\_ d1uwgh1 d1blnb1 d1fpth1  
d1rzga1 d2giya1 d4m3kb1 d1nc2a1 d2nyyd1 d1ncna\_ d1fbih1 d5dxwa\_  
d4fqqa1 d1dqdh1 d1jfq11 d1kelh1 d1faih1 d1frgl1 d1figl1 d4m6nl1  
d1fo0a\_ d4hxb11 d3b5ga\_ d3quyd1 d2h9gb1 d1i8kb\_ d2dd8h1 d2ck0h1  
d1eaja\_ d4w6wb1 d2a6ib3 d1t66d1 d2e27h\_ d1ob1b1 d1f11b1 d2v7na1  
d1ad0a1 d2xt1b1 d1pskh1 d4i13b1 d2op4l1 d1a0ql1 d1uwel1 d1za3a1  
d1ncb11 d4uu9a\_ d1bm3h1 d1cloh1 d1nqba2 d1cf8h1 d4y5va\_ d1mhph1  
d5anma1 d4cdgc1 d4ldeb\_ d1y0lb1 d2pcpb1 d1z3gl1 d1dfb11 d1fh5h1  
d3g5xa1 d1tzib1 d4dn3l1 d3zhka1 d2b1hh1 d2uyla1 d1f3dh1 d1nj9b1  
d2agjh1 d2h1pl1 d1q72h1 d8fabb1 d1ndmb1 d1rjca1 d4u6hb1 d3upca\_  
d2fbj11 d1osph1 d1tvda\_ d2cjh\_ d4fhbd1 d1bd2d1 d1rz7h1 d3nn8a\_  
d1blna1 d1knoa1 d1nfdal d2bmkb1 d1dq11\_ d1igyb1 d1igfl1 d12e8h1  
d3utza1 d1nc2b1 d1rihh1 d4mwfb1 d4jvpa1 d1mieh1 d1rhfa1 d1fgnl1  
d1sbs11 d1lp9e1 d1dn0a1 d4lqf11 d1iaih1 d1kgcd1 d1mh5b1 d1gpol1  
d2g60h3 d1f8t11 d2jixd1 d4grwh\_ d1fo0b\_ d1bfob1 d1axsa1 d1u9ka\_  
d1nmbh\_ d1h8na1 d1h8na2 d1jguh1 d4eura1 d3sdy11 d35c8h1 d1w72l1  
d1mvub\_ d1i9rh1 d1ob1a1 d4wenb\_ d1yeeh1 d3ietc1 d1f58h1 d1ad0b1  
d1mqk1\_ d1nbvh1 d4b50a\_ d3r8bb\_ d1baf11 d1mamh1 d4rgne1 d2gsgb\_  
d35c8l1 d1bafh1 d1ai1h1 d2pcpa1 d2fath1 d2x1pa\_ d1orsb1 d1ibgl1  
d1shma\_ d1a2yb\_ d1u0qa\_ d2coqa\_ d1hilb1 d1qfwi\_ d1jv5b\_ d1fn4b1  
d5e0qa\_ d1nsnh1 d1plgl1 d4ocxl1 d1kb5h1 d1rzfh1 d1pg7x1 d2fx7h1  
d2oi9c\_ d1l7il1 d3eyva1 d1d5il1 d4ffyl\_ d1tetl1 d1a6wh\_ d1ac6a\_  
d3dvfa\_ d1nfde1 d1mimh1 d1ri8a1 d1jhlh\_ d3dura\_ d1fskb1 d1f97a1  
d3so3b1 d2ak4d1 d1lp9f1 d4z7wf1 d1l7th1 d4y5ya\_ d4x7ec1 d1emth1  
d1ikfl1 d1nlbh1 d4utal1 d1bjma1 d1eapb1 d1u6ah1 d2dtgd1 d1kj2b\_  
d1xeda1 d1cleh1 d1fgvh\_ d2bnub1 d2fb4h1 d2dtgb1 d1ktrh\_ d1jp1h1  
d1qkz11 d4hepg\_ d2atpb1 d1flrh1 d2hrpl1 d1mvfa\_ d1iaim1 d3k80a1  
d2jb5h1 d3zkxc\_ d4grwe\_ d1it9h1 d1rhhb1 d3w9ec\_ d1e4wh1 d1sy6h1  
d2j6eh1 d3qxta\_ d1jglh1 d1p7ka1 d1tzhb1 d4n8pa1 d1gaf11 d2jelh1  
d1wioa2 d4i0cc1 d1cicb1 d1lmka2 d1lmka1 d1iqwh1 d1lorqb1 d1ejoh1  
d1jnlh1 d4zg1a\_ d43c9b\_ d1ggbl1 d1wejh1 d3q6fa1 d1f3dj1 d3c6la1  
d1bqlh1 d3p9wb\_ d1a3r11 d1h0db1 d2uzil\_ d1eo8l1 d1qfwl\_ d1n7ml1  
d1igja1 d1c5ch1 d2a9mh\_ d1rmfh1 d1fj1b1 d4heme\_ d1ccza1 d1a5fh1  
d1ogad1 d1dlfh\_ d1qa9b\_ d1vge11 d3qskb\_ d1sjxa\_ d4ozfg1 d1sq2n\_  
d1qd0a\_ d1kcvh1 d1c5db1 d3qcull1 d8faba1 d3bn9d1 d1mjuh1 d4y8dc\_  
d7fabh1 d3dvgb1 d1lo0l1 d1a6tb1 d1gigh1 d1kcrh1 d2hwz11 d1yjdc1  
d3clfl1 d4krna\_ d1d17l\_ d1e6ol1 d1mexh1 d3r0ma\_ d4kkna\_ d1fnsl1  
d1oaqh\_ d1rzia1 d1lucbh1 d1ncwl1 d4b41a\_ d1nfdfl1 d2mpah1 d2d7t11

d4grwf\_ d4b5ea\_ d1lk3h1 d3u79a\_ d4u3xa\_ dlghfl1 dlbvkb\_ dlmcww1  
d1jrhh1 d32c2b1 d4wemb\_ dl dsfh\_ dlop3h1 dlcell1 dliqda1 dlqoka1  
dlqoka2 dlqfuh1 d2crya1 dlay1h1 dloaq1\_ d3ab0b\_ d1rurl1 dlt4kb1  
dlbz7b1 d1n0xh1 d1for11 dlucbl1 d4w6yb\_ d43c9a\_ d2aab11 dltzia1  
d4n1ca\_ dlk6qh1 d3g9ab\_ d4tvsa1 dligmh\_ dl pz5b1 d3dx9a1 d3wxwh\_  
d1nakhl d1kcul1 d3eaka\_ d4qlra1 d1cr9l1 d1d9ka\_ dl f4xl1 dl deea1  
d2i27n2 d1c12a1 d2orb11 dlj8hd1 dlmcph1 d1c5da1 dlkenh1 dlbd2e1  
dlh5ba\_ d4x7fc1 d3upaa\_ d1t3fa1 dlindh1 d2dtgc1 d4hc1l1 dlzv5a1  
d4wgvb\_ dl uwgl1 d4f37k1 d1aqkh1 dlvesa\_ d3zkqd\_ dl fpt11 dllo4l1  
dlknobl d3rrqa\_ dlct8b1 d4orz\_ dlmlbb1 d4hgkc1 dl d qdl1 dl bogb1  
d4ozhe1 dl dr9a1 d1i7za1 d1dn0b1 dlkell1 dl rzib1 dl ypzf1 dlw tla\_  
dlhkfa\_ dl fail1 dlfigh1 d2vyre\_ dl sjva\_ dl ohqa\_ dl bfoa1 dl pkqb1  
dlmjul1 dl b4jl1 dl nsn11 d2arjb1 dl p4bh\_ d4aj0a\_ d3nn8b\_ d2rcja1  
dl f2xk\_ d4v1dd\_ dl adqh1 d2eksa\_ d4k3ga\_ dl jfqh1 dl uweh1 dl frgh1  
d4gftb\_ dl uz8b1 d4n1ea\_ dl bm3l1 dl clo11 d3mcka1 d2vq1a1 dl ae6h1  
d4aq1b1 dl uj3b1 dl nbqa1 dl fh5l1 d2ck0l1 d2ywza\_ dl q72l1 d4nxbx\_  
dlhila1 d4hz1b1 d2j88l1 dlzmya1 dlcd0a\_ dl a4ka1 dlpskl1 dl a0qh1  
d4krmb\_ dlncbh1 d2fbjh1 dlj8he1 dl i3ua\_ dl cf8l1 dl fe8h1 d2plya1  
dl eeqa\_ d2x89a\_ dl o10a\_ d2r0lh1 dlub5a1 dl dfbh1 d3eyvb1 d4jdvb1  
d4p2cg\_ d2gsia1 d2agjl1 dl u3ha1 d2h1ph1 dl rih11 dl fskc1 dl bogal  
d2a77l1 dl ospl1 dl qfoa\_ d3dwta\_ d2fx7l1 dl rz7l1 d3stba1 dl pkqa1  
dlb6da1 dl dzba2 dl dzba1 dl kj2a\_ d4l1ha\_ dl rzgb1 dl dqlh\_ dl 2e8l1  
dlmie11 dl jmaa\_ dl sb11 dl fgnh1 dl f58l1 dl mqkh\_ dl ndgb1 d3qegl1  
dliaill d2aw2a1 dl tqbc1 d3fo2a1 d4dkaa\_ dl f8th1 d2g60l1 d2ywya\_  
dluj3a1 dl yc7a\_ d3bd3a\_ d4w6xb1 dl nmb1\_ dl i8ka\_ dl rjlb1 dl ypzl1  
dlp7kb1 dl kxqe\_ dl gpoh1 d2z4qa1 dlw72h1 dl i9rl1 d4qgya1 d4xt1c\_  
d2qqnh1 dl cical d3c08h1 d2cd0a\_ d2bdnh1 dl hnga1 dl mam11 dl nldh1  
dlcr9h1 d4lcih1 d3bkyh1 d3qg7l1 dl ai1l1 dl kxvc\_ d4iosd\_ dl l7ih1  
d2x1qa\_ dlub6b1 d3k74b\_ dl libgh1 dl teth1 dl igya1 dl hxma1 d2x6ma\_  
d2e7la\_ d5e03a\_ dl qfwm\_ d2r0kh1 dl igjb1 dl rurh1 dl plgh1 dl mj8h1  
dl yuhb1 d3fmg11 dl rzfl1 dl emt11 dl ad9b1 dl igtb1 dl n1bl1 dl d5ih1  
d3k7ua\_ d4ffyh\_ dl bwva\_ d3dvga1 dl a6ta1 dl fgvl\_ d4qxgl1 dl mim11  
dljh11\_ d2hffb1 d2hh0l1 dl qkzh1 dl l7t11 dl afvh1 dl iaai1 d2cjuh\_  
dlum5h1 d2ghwb2 d2ghwb1 dl kgce1 d2fgwh1 dl ikfh1 dl dvfd\_ d2i24n1  
d2xtjb\_ dl za3b1 d2yc1a\_ d2hh0h1 d2x1oa\_ dl bvka\_ dl rjla1 d5e7ba1  
dligta1 dl i11b1 d2fb4l1 dl mvua\_ dl jpt11 d32c2a1 dl fvca\_ dl iqdb1  
d2hrph1 d2p4ab\_ d4qo1a\_ dl p2cb1 dl wt5c\_ dl t4ka1 d5c1mb\_ dl it9l1  
dlbz7a1 dl b2wh1 dl e4wl1 dl jnl11 dl yedb1 dl za6b1 d3u7aa\_ dl igfh1  
d3gnml1 dl orsa1 dl wejl1 dl a2ya\_ dl hxmb1 dl gafh1 d2j4wh1 dl pz5a1  
dlj05a\_ dl a3rh1 d4fq1l1 dl qfwh\_ dl eo8h1 dl n7mh1 d4s11a\_ dl kegh1  
d5da4a\_ dl iqwl1 d3whxb1 dl vgeh1 dl deeb1 dl c12b1 dl t2ql1 dl ad9a1  
d3gsnb1 d3b2uc1 dl ggbh1 dl t3fb1 dl nak11 d4ocmc\_ dl lila1 d2v7hb3  
d2esve1 dl mcoh1 d2qr0b1 d2q3aa\_ dl ct8a1 dl kcr11 d2pxyb\_ d2uzih\_  
d5c3ld\_ d3durb\_ dl c5cl1 d2ak4e1 dl d17h\_ dl xiwd\_ dl mlba1 dl rmfl1

d1i7zb1 d1dlf1\_ d2xa3a\_ d5bq7b1 d1dqqb1 d3h4211 dlegjh1 d1kcvl1  
d1fe8l1 d2j6e11 d1f3rb2 d1lk3l1 d1sm3h1 d1q0xh1 d1ghfh1 d7fabl1  
d1igch1 d1l00h1 d4idla\_ d5c2b1\_ d1jrh11 d1il1a1 d3zhda1 d4kfzc\_  
d1b0wa\_ d1e6oh1 d1mexl1 d4krpb\_ d1fnsh1 d1ncwh1 d4hgma\_ d4eigb1  
d4rzca\_ d2mpa11 d4y5xa\_ d5en2b1 d3lrga1 d4ej1c1 d1rhha1 d1j05b\_  
d1forh1 d1q9wb1 d2wzpd\_ d2aq2a1 d1h0da1 d3revb1 d2ij0c1 d1tzh1  
d4m7j11 d1k6q11 d3b9kc1 d1igml\_ d3qeua1 d1dsfl\_ d1celh1 d1kcuh1  
d1zvha1 d1zvoa1 d1tqbb1 d1ay111 d2qsc11 d2cgrh1 d1n10h1 d1kenl1  
d3eo0a1 d4n9ob1 d1n0xl1 d3k1kc\_ d2cqva1 d1fhga\_ d2k1ma\_ d2dl2a1  
d1biha3 d1biha1 d1biha4 d3qp3a1 d1g1ca\_ d1gxea\_ d1cvsc2 d1cvsc1  
d1xmwa2 d1m4ka2 d2otpa2 d1biha2 d1rhfa2 d2fcba2 d2fcba1 d1wwbx\_  
d1gsma2 d1epfa1 d1epfa2 d2dava1 d1waaa\_ d1f97a2 d1x44a1 d1vcaa2  
d1fnla2 d1fnla1 d3b5ha2 d3h8na2 d3h8na1 d1jbja1 d1jbja2 d1pd6a\_  
d1f2qa2 d1f2qa1 d3cx2a\_ d1nbqa2 d3b5ha1 d1n26a1 d1xiwb\_ d1xaua\_  
d1fltx\_ d2ifga1 d1o1la1 d1o1la2 d1cs6a4 d1cs6a3 d1cs6a2 d1cs6a1  
d2gw5a2 d1sy6a1 d1xiwa\_ d1ucta2 d1ucta1 d1ry7b2 d1gl4b\_ d1qz1a3  
d1olza1 d2c9aa1 d1wwca\_ d2aq2b1 d1ck1a1 d1enfa1 d1i4pa1 d1v1oa1  
d1et9a1 d1esfa1 d2g9hd1 d4ohja1 d1bxta1 d1eu3a1 d1ty0a1 d1fnua1  
d1c4qa\_ d1prtcl d2wv6d\_ d1prtfl\_ d1ltrd\_ d4l63b1 d1r4pb\_ d1prtd\_  
d1tl0f\_ d2bosa\_ d3chbd\_

**Family-4 (a.138.1.3)**

**Positive dataset contains 6 protein sequences.**

d3ubra\_ d1d4ca1 d2k3va\_ d2j7aa\_ d4fasa\_ d1sp3a\_

**Negative dataset contains 3985 protein sequences.**

d1m32a\_ d1libja\_ d1c7na\_ d4q75a\_ d2bkwa1 d1t3ia\_ d1n8pa\_ d1qz9a\_  
d1jf9a\_ d1eg5a\_ d1p3wa\_ d3kgwa\_ d1cl1a\_ d2ctza1 d1vjoa\_ d2rfva\_  
d1gc0a\_ d1cs1a\_ d1d2fa\_ d2ch1a1 d1qgna\_ d1pffa\_ d1elua\_ d2xlba\_  
d3m83a1 d1u08a\_ d1lc5a\_ d1b5pa\_ d2ay1a\_ d1bw0a\_ d3pd6a\_ d7aata\_  
d2csta\_ d1j32a\_ d4wlha\_ d1o4sa\_ d1v2da\_ d1gdea\_ d1m6sa\_ d1v72a1  
d1svva\_ d1ajsa\_ d1wsta1 d2f8ja2 d1lk9a\_ d1vp4a1 d1xi9a1 d2gb3a1  
d1yaaa\_ d1jx4a2 d3gv5b1 d1t94a2 d3bq0a2 d3i2ka1 d1lnsa3 d1mpxa2  
d1xkta1 d2hfka\_ d1jmkc\_ d5d3ka\_ d2cfba1 d1o69a\_ d1bj4a\_ d3k28a\_  
d2bwpa\_ d3lg0a\_ d2fnua\_ d3ou5a\_ d1z7da1 d1b9ha\_ d1iaya\_ d4msoa\_  
d1bs0a\_ d1s0aa\_ d1sffa\_ d3tqxa\_ d1mdoa\_ d3qboa\_ d3pgya\_ d1bjna\_  
d2dkja\_ d1ejia\_ d1vefa1 d4wxga\_ d3bs8a\_ d3gbxa1 d1w23a\_ d1r0ka3  
d1vkoa2 d1vm6a2 d3qvsa2 d1gr0a2 d1p1ja2 d1t61c1 d1g8fa3 d1f56a\_  
d1bypa\_ d1azca\_ d1ws8a\_ d3u25a\_ d1cuoa\_ d1id2a\_ d1rkra\_ d2iaac\_  
d4dp1x\_ d1nwpa\_ d2gima\_ d2i7sa\_ d1qhqa\_ d3ehbb1 d1fftb1 d1gyca3  
d1hfua2 d1kbva1 d1kbva2 d1sdda1 d1sdda2 d1gyca1 d1gyca2 d1mzya1  
d2bw4a1 d1aoza1 d1aoza3 d1aoza2 d1kyaa2 d1kyaa3 d1kyaa1 d1mzya2  
d4e9sa1 d1sddb1 d1sddb2 d1hfua1 d1hfua3 d1oe1a2 d1oe1a1 d1v10a2  
d1v10a3 d1v10a1 d1rypd\_ d1irua\_ d1rypc\_ d3unfk\_ d1rypa\_ d1j2pa\_  
d1irui\_ d1j2qh\_ d3unfh\_ d1m4ya\_ d1rypb\_ d1irul\_ d1irug\_ d1iru2\_  
d1q5rh\_ d1rypg\_ d1g3ka\_ d1iruf\_ d1q5qa\_ d1e94a\_ d1irub\_ d1ryph\_

d3ty6a\_ d1iruj\_ d1iruk\_ dlrype\_ d1irud\_ d1irue\_ d3mi01\_ d1rypf\_  
d1iruh\_ d2z3ba\_ d1iruc\_ d3mka2\_ d1iru1\_ d1a3qa1 d1iknc\_ d3brda1  
d1p7h11 d1oy3c\_ d1imhc1 d1gjia1 d1zk9a1 d2cxka1 d2bema\_ d1pama1  
d1ea9c1 d1qhoa1 d2fhfa2 d2fhfa1 d1k3ia1 d1j0ha1 d1cxla1 d2bhua1  
d1edqa1 d1flsa2 d1ut9a2 d1gvia1 d1txka1 d4alac\_ d1pjwa\_ d1rera1  
d1s6na\_ d3uzqb\_ d2phla1 d1fxza2 d1fxza1 d1lrha\_ d1uija1 g1dgw.1  
d2v09a\_ d1uika2 d1uika1 d1dgwa\_ d1ds6b\_ d1fstb\_ d3us3a3 d3us3a1  
d4mh8a\_ d4i7ga1 d2b5ea2 d2b5ea3 d2b5ea1 d2b5ea4 d2kp1a1 d2kp2a1  
d1hyua3 d1hyua4 d1j08a1 d2bjca1 d2hsga1 d1qpza1 d1ydwa2 d2nvwa2  
d1zh8a2 d1qkia2 d1xeaa2 d1t1ta2 d1mqta\_ d1d4m3\_ d1fmd3\_ d2mev1\_  
g1aym.1 d1ev13\_ d4q4w1\_ d1r1a3\_ d2x5ia\_ d1rhi1\_ g1r1a.1 g1d4m.1  
g1rhi.1 d1b35b\_ d1loopa\_ d1tme1\_ d4iv1a\_ g1pvc.1 g1fpn.1 d1fpn1\_  
d4gb31\_ d1d4m1\_ d1fmd1\_ d1ev11\_ d2wzr3\_ g1cov.1 d1qqp3\_ g1fmd.1  
d2x5ic\_ d1rhi3\_ g1oop.1 d1hxs1\_ g1hxs.1 d1fpn3\_ d1bev1\_ g2mev.1  
d1eah3\_ d1aym1\_ d1pvc3\_ d1qqp1\_ d1zba3\_ d1h8ta\_ d3vbhc\_ g1b35.1  
g1bev.1 d1hxs3\_ g1ev1.1 d1bev3\_ g1tmf.1 d1tmf1\_ d1b35a\_ d2mev3\_  
g1eah.1 g1h8t.1 d1eah1\_ d4q4w3\_ d1r1a1\_ d1aym3\_ d1pvc1\_ d1zba1\_  
d1h8tc\_ d1loopc\_ d1tme3\_ g1qqp.1 d4iv1c\_ g1tme.1 d1au7a2 d1e3oc2  
d2ovga\_ d1sq8a\_ d1rzsa\_ d3kz3a\_ d3orca\_ d3gpdg2 d2q49a2 d1hdgo2  
d2g17a2 d2cvoa2 d2czca1 d3pwka2 d1obfo2 d1i32a2 d1zyao2 d2pkqo2  
d1b7go2 d2hjsa2 d1cf2o2 d1vkna2 d1nvmb2 d2msya\_ d2djoa1 d2r5za\_  
d1au7a1 d1f43a\_ d2lmda1 d1akhb\_ d1s7ea1 d3nara\_ d1zq3p1 d2craa1  
d1mija\_ d4uuta\_ d3a01a\_ d1x58a1 d3rkqa1 d3cmya1 d2cqxa1 d2da6a1  
d1e3oc1 d1fjla\_ d1mh3a1 d1ig7a\_ d1x41a1 d1wh7a1 d1gt0c1 d2mw8a\_  
d1lfup\_ d1x2ma1 d1b72a\_ d1wi3a1 d1jgga\_ d1wjha1 d1x2na1 d1mnmc\_  
d2cuea1 d3k2aa\_ d2hosa\_ d2jwta2 d1pufa\_ d1octl1 d2hi3a\_ d1b8ia\_  
d4j19a\_ d3lnqa\_ d1wh5a1 d1b8ib\_ d1fexa\_ d2cqra1 d1ug2a1 d2cqqa1  
d2ajea1 d4a69c\_ d1h8ac1 d2crga1 d2iw5b1 d1xc5a1 d1ofcx1 d2cu7a1  
d1wgxa1 d2cjja1 d2ckxa1 d1gvda\_ d1hcra\_ d1tc3c\_ d1gdta1 d1u78a2  
d1igna2 d2iu5a1 d1zk8a1 d2g7sa1 d2fd5a1 d2np5a1 d1z0xa1 d2id6a1  
d2d6ya1 d2i10a1 d1vi0a1 d2oi8a1 d3c07a1 d2ns7a1 d2fq4a1 d2yvea1  
d1t33a1 d2o7ta1 d1rhta1 d2np3b1 d2g7ga1 d2gena1 d2fbqa1 d2g7la1  
d2gfna1 d2g3ba1 d2jj7a1 d2hyja1 d1sgma1 d1ui5a1 d2hkua1 d2id3a1  
d4jyka1 d3lv8a\_ d1s3ga1 d1zaka1 d1s4qa\_ d3tvta2 d1uf9a\_ d1khta\_  
d1ckea\_ d1osna\_ d1p5zb\_ d4tmka\_ d3cm0a\_ d1tmka\_ d1jaga\_ d3h86a\_  
d1t0hb\_ d1nn5a\_ d2h92a\_ d3kb2a1 d2c95a1 d1yj5a2 d1kgda\_ d2ak3a1  
d1vyva2 d1deka\_ d2grja1 d1p3ja1 d1y63a\_ d1e4ya1 d1s96a\_ d3iija1  
d1lvga\_ d1nksa\_ d1vyua2 d4e22a\_ d1qf9a\_ d1jjva\_ d1q3ta\_ d1ki9a\_  
d1lw7a2 d1teva\_ d1kjwa2 d1gsia\_ d1g3ma\_ d1j99a\_ d1t8ta1 d1nsta\_  
d1fmja\_ d1zrha\_ d1ls6a\_ d2a3ra\_ d1aqua\_ d2zptx\_ d3ckla\_ d1texa\_  
d1q44a\_ d2gwaha\_ d1k6ma1 d1z0ja1 d3umra2 d3gj0a1 d2gaoa1 d1yzga1  
d1x3sa1 d1g7sa4 d1puja\_ d1udxa2 d1kk1a3 d2o52a\_ d1jwyb\_ d1zcaa2  
d1zcba2 d2fv8a1 d2cjwa\_ d3dz8a1 d1xzpa2 d1vg8a\_ d4qxaa\_ d2ew1a1  
d1x1ra1 d2bcgy\_ d3doea1 d3cona\_ d3rega\_ d3wyga\_ d1upta\_ d2b6ha1

d1zd9a1 d1lnza2 d1r5ba3 d1n0ua2 d1r2qa\_ d2f9la1 d2rhda\_ d3q3jb\_  
d3q85a\_ d1efma1 d1r8qa\_ d2gf9a1 d2akab1 d1ek0a\_ d1z08a1 d2gcoa1  
d2dyla2 d4g01b\_ d2cxxa1 d1svia\_ d3q72a\_ d1ni3a1 d4ac9a4 d2erxa1  
d2bmea\_ d1wxqa1 d2gf0a1 d4ldja1 d1zunb3 d4lv5b\_ d1efca3 d1kmqa\_  
d2g6ba1 d3lrpa\_ d1tada2 d2y8ea\_ d4rd4a1 d1z06a1 d2heia\_ d3a58b\_  
d1u0la2 d1d2ea3 d1zj6a1 d2ocba\_ d3rwoa\_ d1mr3f\_ d2e9sa1 d4u5xa1  
d2iwra\_ d2fn4a1 d3bwdd\_ d2nzja1 d2atva1 d2ksqa\_ d3l43a\_ d1mkya2  
d1mkya1 d1wmsa\_ d1jnaya3 d2rmka\_ d1f6ba\_ d1f60a3 d1gota2 d1jala1  
d2fh5b1 d1g16a\_ d2wblc\_ d1m7ba\_ d1wf3a1 d1f5na2 d1t9ha2 d1z6xa1  
d1z0aa1 d2fg5a1 d2a5ja1 d2bcjq2 d1s0ua3 d1ky3a\_ d4y0va\_ d4lhwa\_  
d2qmea1 d2atxa1 d1egaa1 d1ryha\_ d1moza\_ d1nrjb\_ d2erya1 d3bfka\_  
d1puia\_ d1fzqa\_ d3j3az1 d3t5ga\_ d1shza2 d3defa\_ d2f7sa1 d3raba\_  
d3tsoa\_ d3aq4a\_ d2a17a1 d3sfva1 d3bc1a\_ d2ncda\_ d1sdma\_ d3h4sa1  
d2heha\_ d2grya\_ g3kin.1 d1kk8a2 d1br2a2 d1goja\_ d1f9va\_ d2mysa2  
d1lkxa\_ d3t0qa\_ d4db1a1 d3gbja\_ d1ry6a\_ d1v8ka\_ d1k8ka2 d1k8ka1  
d3uleb1 d3i33a2 d3i33a1 d1bupa1 d1dkgd2 d1dkgd1 d4ci6a2 d1jcfa1  
d4a2ba2 d2fxua1 d1yaga2 d1yaga1 d4cbua2 d1bupa2 d1iqca2 d1iqca1  
d1eb7a2 d1eb7a1 d1nmla1 d1niral d1qksa1 d1zc6a1 d1zbsa1 d1zbsa2  
d1zc6a2 d2ch5a2 d2ch5a1 d1zxo2 d1zxo1 d1hroa\_ d4gedb\_ d3zooa\_  
d1mz4a\_ d1gu2a\_ d1f1fa\_ d1dvva\_ d1c6ra\_ d1c75a\_ d1e29a\_ d1gdva\_  
d1cnoa\_ d1h32b\_ d1co6a\_ d2bh4x\_ d2aiua\_ d5cytr\_ d1jdl\_ d1i8oa\_  
d2zboa\_ d3dmia\_ d1ls9a\_ d1wvec\_ d2yk3a\_ d3ph2b\_ d1dw0a\_ d5aura\_  
d1ql3a\_ d1qn2a\_ d1f1ca\_ d4zzva\_ d2xspa\_ d1eg1a\_ d4v20a\_ d1ojja\_  
d4ipma1 d4csia\_ d3pfza\_ d3ovwa\_ d2yoka\_ d1evsa\_ d1cnt1\_ d1pvhb\_  
d1z7ca\_ d1huwa\_ d1bgea\_ d1rhga\_ d1f6fa\_ d1f45b\_ d1i1rb\_ d1axia\_  
d1etea\_ d3tgxb\_ d2z3qa1 d3qb1a\_ d1hula\_ d1m48a\_ d4nkqb\_ d1eera\_  
d1v7mv\_ d5e4ea\_ d2o27a\_ d3b5ka\_ d2psma1 d4zf7a\_ d3uf5a\_ d4x51a\_  
d4ypgc1 d3oq3a\_ d1lqsl\_ d1n1fa\_ d1aula\_ d1wu3i\_ d3bes1\_ d3ux9a\_  
d1v8fa\_ d2ejca\_ d3muea1 d3q12a1 d4dnxa2 d1m8pa2 d1v47a2 d1g8fa2  
d1x6va2 d3rbaa\_ d2qtra\_ d3l92a\_ d1f9aa\_ d1qjca\_ d2h29a\_ d1vlha\_  
d1od6a\_ d1lw7a1 d1mrza2 d4ruka\_ d2e17a\_ d1iq0a2 d1irxa2 d1r6ta2  
d1ivsa4 d2cyba\_ d1rqga2 d1j09a2 d2yxna\_ d1f7ua2 d1h3fa1 d1ffya3  
d2g36a1 d1nzja\_ d1jila\_ d1n3la\_ d1pfva2 d1h3na3 d3n9ia\_ d3sz3a1  
d3sw2a\_ d1moxc\_ d1dx5i3 d1edmb\_ d1aut12 d1aut11 d1nqlb\_ d1dva11  
d1szba2 d1kigl\_ d2y5fl\_ d1ijqa2 d1gk5a\_ d1g1sa2 d1nt0a3 d1xdtr\_  
d1lmja2 d1lmja1 d1nzia2 d2wphe\_ d1klil\_ d1pfx12 d1pfx11 d1p9ja\_  
d1g1ta2 d1f7ea\_ d4yzub\_ d2mgpa1 d1b9wa1 d1b9wa2 d2mgpa2 d1ob1c1  
d1n1ia2 d1n1ia1 d2npra2 d2npra1 d2y5ia\_ d1qlsa\_ d1psra\_ d3n22a\_  
d2egda\_ d4ggfc\_ d2wcea\_ d2luca\_ d4aqia\_ d3nsia\_ d2lp3a\_ d1j55a\_  
d1a4pa\_ d1k8ua\_ d3fs7a\_ d2pvba\_ d1ttxa\_ d1rwya\_ d2kyfa\_ d1rk9a\_  
d1a75a\_ d1exra\_ d1tiza1 d1nyaa\_ d1g8ia\_ d1ggwa\_ d1wdcc\_ d3fwba\_  
d1ggza\_ d2o5ga\_ d1ctaa\_ d1m45a\_ d3i5gc\_ d1sl8a\_ d1fpwa\_ d2scpa\_  
d2roaa\_ d4aqra\_ d3pn7b\_ d1br1b\_ d2mysb\_ d1s6ca\_ d1bjfa\_ d2obha\_  
d1jfk\_ d1jf0a\_ d1qv0a\_ d1lkja\_ d2mlfc\_ d2m97a\_ d2d8na\_ d4by5a\_

d1jbaa\_ d4nqga\_ d1wdcb\_ d2mysc\_ d1j7qa\_ d1s6ia\_ d1uhka2 d1r2ua\_  
d1dtla\_ d3kf9a\_ d3pn7c\_ d1qjta\_ d1fi6a\_ d1c07a\_ d5d67d\_ d1tuza\_  
d1h8ba\_ d1eg3a1 d1eg3a2 d2zkmx1 d1snla\_ d1wkya2 d1uuqa\_ d3wh9a\_  
d4m1ra\_ d1xyza\_ d4xuya\_ d2je8a5 d4bf7a1 d3cuia\_ d1ur4a\_ d1qw9a2  
d1odza\_ d2vzsa5 d1bqca\_ d2x2ya1 d1hjqa\_ d1qnra\_ d4y7ea1 d4k68a\_  
d2v3ga\_ d4hpga\_ d1nofa2 d1nq6a\_ d1h4pa\_ d1aq0a\_ d3ziza\_ d4bs0a\_  
d1ecea\_ d1h1na\_ d1ta3b\_ d1w91a2 d1ilwa\_ d1uhva2 d1us3a2 d1legza\_  
d7a3ha\_ d1tvna1 d3nyda1 d1ghsa\_ d2cyga1 d4xv0a\_ d2c8na2 d1w32a\_  
d3emca\_ d1v6ya1 d1foba\_ d2uwfa1 d2fgla\_ d3niya1 d2c0ha1 d1rh9a1  
d1yq2a5 d1szna2 d1fa2a\_ d1pama4 d5do8a1 d1ea9c3 d1hx0a2 d2fhfa5  
d1qhoa4 d1avaa2 d1m53a2 d4m8ua1 d2gjpa2 d1lwha2 d4howa1 d1ktba2  
d1j0ha3 d3vm5a1 d2x1ia\_ d1wzaa2 d1uasa2 d2diea1 d1mxga2 d1ht6a2  
d1eswa\_ d1iv8a2 d5cpsa\_ d1ud2a2 d1zjaa1 d3gbea1 d1kwga2 d1wdpa\_  
d1gcy2 d1g5aa2 d1hvxa2 d3dhpa2 d2bhua3 d4do4a1 d3qgva1 d1e43a2  
d1g94a2 d2d3na2 d1gjwa2 d1gvia3 d1x1na1 d1r7aa2 d1tz7a1 d2x42a1  
d1tr9a1 d3abza1 d4c7ga2 d2gjxa1 d1nowa1 d1yhta1 d4toqa\_ d1wb0a1  
d1w9pa1 d1eoka\_ d1itxa1 d1kfwal d1goia2 d1edqa2 d2gsja\_ d1hjxa1  
d1jnda1 d1vf8a1 d3wdpp1 d3wq5a\_ d1gnxa\_ d4gxpa\_ d4hz8a\_ d1e4mm\_  
d3aiua\_ d1wcca1 d3ahxa\_ d1v02a\_ d2dgaa\_ d1pbga\_ d1vffa1 d1qoxa\_  
d4ha4a\_ d1g4ma1 d1g4ma2 d1offa\_ d1frra\_ d3wcqa\_ d1e9ma\_ d1l5pa\_  
d1wria\_ d1i7ha\_ d3av8a\_ d1czpa\_ d1rfka\_ d3plma1 d3b2ga\_ d2bt6a2  
d3nvva1 d1krha3 d2h88b1 d1n62a2 d1t3qa2 d1kf6b2 d1zoyb1 d1jq4a\_  
d1ffva2 d1dgja2 d1rm6c2 d1h6ta1 d1h6ua1 d9ldta1 d2ewda3 d1up7a1  
d2dfda1 d1s6ya1 d1vjta1 d7mdha1 d1hyea1 d1t2da1 d1ojsa3 d1ldna1  
d1hyha1 d1civa1 d2a92a1 d1ez4a1 d1i0za1 d1y6ja1 d1gv0a1 d1ur5a1  
d1llda1 d1obba1 d1v8ba1 d1gdha1 d1l7da1 d2dllda1 d1mx3a1 d1ygya1  
d1qp8a1 d1li4a1 d1j4aa1 d1npya1 d3t4ea2 d1a4ia1 d1o0sa1 d2hk9a2  
d2egga2 d1b26a1 d1bvua1 d1gq2a1 d1c1da1 d1leha1 d1gtma1 d1euza1  
d1nvtal d3dona2 d1edza1 d1vi2a1 d1p77a1 d1nyta1 d1b0aa1 d1vl6a1  
d1v91a1 d1txga2 d3f47a1 d1mv8a2 d2pv7a2 d1xc2a3 d2ahra2 d4xiya1  
d2f1ka2 d1pgja2 d1i36a2 d1np3a2 d1lj8a4 d1teaa3 d1qmga2 d2i76a2  
d2g5ca2 d1wdka3 d1dlja2 d3cuma3 d1kola2 d1f8fa2 d1qora2 d1jqba2  
d1vj0a2 d1cdoa2 d1gu7a2 d1d1ta2 d1xa0a2 d2dm6a2 d1jvba2 d1rjwa2  
d1llua2 d1tt7a2 d1piwa2 d1o89a2 d1iz0a2 d1e3ja2 d1yb5a2 d1uufa2  
d1vj1a2 d1e3ia2 d3gpdg1 d1vc2a1 d2nvwa1 d1u8fo1 d1ydwal d1hdgo1  
d2g17a1 d1cf2o1 d2czca2 d1r0ka2 d1obfo1 d2cvoa1 d1ebfa1 d1h6da1  
d1i32a1 d1zh8a1 d2q49a1 d1qkia1 d3pzra1 d1xeea1 d1vkoa1 d1vm6a3  
d3qvsa1 d2pkqo1 d1b7go1 d1gr0a1 d1p1ja1 d1lc0a1 d1j0xo1 d3pwka1  
d2hjsa1 d1zyao1 d1vkna1 d1tlta1 d1nvmb1 d3sjua\_ d3ojfa1 d1xu9a1  
d2jjya1 d1n7ha\_ d1y1pa1 d1h5qa\_ d1jtva\_ d4fs3a\_ d2bkaa1 d1gy8a\_  
d2c5aa1 d1ulsa\_ d1ooea\_ d2b69a1 d1y5ma1 d1spxa\_ d1ae1a\_ d1bxka\_  
d1ydea1 d1gega\_ d1hdoa\_ d1o5ia\_ d1e6ua\_ d1snya1 d2rhca\_ d3zv4a\_  
d5ceja\_ d2d1ya1 d1fjha\_ d3w8ea\_ d2fmua1 d1x1ta\_ d1rpna\_ d3ay7a1  
d1k2wa\_ d1eq2a\_ d2hrba1 d3ruaa\_ d2ew8a1 d4hwka\_ d1xgka\_ d2bd0a1

d1yo6a1 d2a35a1 d2ntva\_ d1vl18a\_ d1hdca\_ d4bkua\_ d2ag5a1 d2q45a\_  
d1nffa\_ d4iy1a\_ d1zbqa1 d1kewa\_ d1lek6a\_ d1ja9a\_ d2q46a2 d1iy8a\_  
d1cyda\_ d2ptga\_ d1hxha\_ d1uzma1 d3lyla\_ d4m89a\_ d3wyea\_ d2b11a1  
d1w6ua\_ d1sb8a\_ d2q2va\_ d4nr0a\_ d1e6wa\_ d2gasa\_ d3oiga1 d2bgka1  
d1mxha\_ d1vl0a1 d1rkxa\_ d1r6da\_ d1wmaa1 d1e7wa\_ d2c07a1 d1xkqa\_  
d3tzha\_ d1g0oa\_ d3lz6a\_ d1qyca\_ d1ledoa\_ d1gz6a\_ d1oc2a\_ d1t2aa\_  
d1zema1 d2xoxa\_ d1z45a2 d1geea\_ d1p33a\_ d3lt0a\_ d4e6pa\_ d2wyua\_  
d1db3a\_ d4q9na\_ d1xhla\_ d4o1ma\_ d1fmca\_ d2uvda\_ d2gdza1 d1uaya\_  
d2z1ma\_ d2o23a2 d2fr1a2 d2fr1a1 d1qsga\_ d1qyda\_ d4zjua\_ d2a4ka1  
d1ybl1a\_ d1wvga1 d1yxma1 d3f4ba\_ d1mg5a\_ d1xg5a1 d4ekfa\_ d2ckga\_  
d1th0a\_ d2bkra\_ d1g0da4 d2f4ma1 d1x3za\_ d1mdwa\_ d1qxp4 d1ziva1  
d1zcm1 d3ioqa\_ d1fh0a\_ d1o0ea\_ d1khqa\_ d1m6da\_ d2cb5a\_ d1cs8a\_  
g8pch.1 d1s4va\_ d2pnsa\_ d1vsna1 d1mira\_ d1iwda\_ d2oula\_ d7pcka\_  
d3bwka\_ d3bcna\_ d2p86a\_ d1pvja\_ d1pcia\_ d1gece\_ d1deua\_ d4bs6a\_  
d1xkga1 d1cqda\_ d1jqpa2 d2c0ya\_ d2bdza\_ d3p5ua\_ d1ex4a2 d1c6va\_  
d2jk6a2 d2jk6a1 d1fec1 d1fec2 d1lpfa1 d1lpfa2 d1xhca1 d1xhca2  
d1dx1a2 d1dx1a1 d1gera2 d1m6ia2 d1onfa2 d3lada2 d3lada1 d1w4xa1  
d1w4xa2 d1gesa2 d1mo9a1 d1xdia1 d1fl2a2 d1fl2a1 d1fcda1 d1fcda2  
d1h6va2 d1h6va1 d1mo9a2 d1gv4a2 d1gv4a1 d2gv8a2 d2gv8a1 d1aoga1  
d1aoga2 d1hyua1 d1ebda1 d1ebda2 d3dk9a1 d1q1ra2 d1q1ra1 d1gesa1  
d1w5qa\_ d2c1ha\_ d1ohla\_ d1l6sa\_ d1zbf1a\_ d2z1ha\_ d2etja1 d3qioa1  
d1j11a\_ d2e41a\_ d1j12a\_ d2lsna1 d1uaxa\_ d2yv0x\_ d1mu2a1 d1leka\_  
d1i39a\_ d1pn0a1 d1reo1 d1ju2a1 d2f5va1 d3c96a1 d2gmha1 d1gpea1  
d1o5wa1 d1n4wa1 d1k0ia1 d2dw4a2 d2ivda1 d1seza1 d2voua1 d1kdga1  
d1s5ja1 d2hbja2 d2igia\_ d1wlja\_ d1qhta1 d4dlea1 d1tgoa1 d2f96a1  
d3tr8a1 d3mxma\_ d1q8ia1 d1y97a1 d1w0ha\_ d1kfsa1 d2py5a1 d1noya\_  
d1d5aa1 d1yt3a3 d2guia\_ d3mwp1a1 d4kb1a\_ d1js9c\_ d1za7a\_ d1laja\_  
d1wgqa1 d1v89a1 d2coda1 d1zc3b\_ d1wg7a1 d1u5ea1 d1v61a1 d2coca1  
d2ys1a1 d1v5pa1 d1ntya2 d1wjma1 d1wila1 d1u29a\_ d1xx0a1 d1lunqa\_  
d2zkmx3 d1fhoa\_ d1v88a1 d2adza1 d1x1fa1 d1p6sa\_ d2coaa1 d1btka\_  
d1v5ma1 d1faoa\_ d2x18a\_ d1dyna\_ d1x1ga1 d4kaxb\_ d2j59m1 d1kilb2  
d1xcga2 d1txda2 d1u5da1 d1dbha2 d1wlha\_ d1upqa\_ d1v5ua1 d1foea2  
d2fj1a1 d1eaza\_ d2dfka2 d2cofa1 d1kz7a2 d1jmx2a1 d1jmx1a1 d1pbya2  
d1r7ha\_ d1faaa\_ d1wika1 d1xfla\_ d1ttza1 d2f51a1 d1ti3a\_ d1nhoa\_  
d1sena\_ d2i4aa\_ d1ep7a\_ d1zmaa1 d1fo5a\_ d3lefa1 d3diea1 d2yana1  
d1z6na1 d1oaza\_ d3zywa1 d4aj8a\_ d1nm3a1 d4fiwa\_ d1wmja\_ d4hs1a1  
d1liloa\_ d1xwaa1 d1wjka1 d2vm1a\_ d1fb6a\_ d1gh2a\_ d1h75a\_ d1nw2a\_  
d1kx5b\_ d3a6na\_ d4m6ba2 d2nqbd\_ d3wkjd\_ d2yfwe\_ d4h9na\_ d5bnxa\_  
d1kx5c\_ d3r45a\_ d1eqzb\_ d4jjnb\_ d1f66c\_ d1eqza\_ d4wnnb\_ d1kx5a\_  
d1u35c1 d1id3a\_ d2nqbc\_ d1kx5d\_ d1ku5a\_ d1flea\_ d1b67a\_ d1tafa\_  
d1bh9b\_ d1jfib\_ d1q9ca\_ d1h3ob\_ d2byka1 d1n1ja\_ d4g92b\_ d1bh9a\_  
d1jfia\_ d1h3oa\_ d2bykb1 d1n1jb\_ d1pd212 d1nhya2 d2a2ra2 d1k0dd2  
d1f2ea2 d1gsua2 d1f3ba2 d2fhea2 d2pvqa1 d1tw9a2 d1oyja2 d1e6ba2  
d3ik7a1 d4is0a1 d1r5aa2 d1jlva2 d1m0ua2 d3gtub2 d1z9ha2 d1okta2

d1axda2 d2gsra2 d1tu7a2 d1k3ya2 d1zgma1 d1b48a2 d1gnwa2 d1gwca2  
d2gsta2 d1glqa2 d1oe8a2 d1pn9a2 d1v2aa2 d1fw1a2 d1duga2 d1lovna2  
d2trcp\_ d1ig8a1 d1czan2 d1czan3 d1czan1 d1ig8a2 d1czan4 d1bg3a4  
d1bg3a3 d1bg3a2 d1bg3a1 d1novc\_ d2bbvc\_ d3h1jd1 d1qusa\_ d4ilya\_  
d4olta\_ d1qgia\_ d21j7a\_ d2m8bb1 d2kyqa\_ d3psma\_ d1jkza\_ d1jxca\_  
d2g11a\_ d1ugla\_ d4uj0a\_ d1qqya\_ d1gd6a\_ d1f6ra\_ d1livma\_ d2gv0a\_  
d1iiza\_ d2z2fa\_ d1j8xa\_ d1gh1a\_ d1b9oa\_ d1741a\_ d1691a\_ d2o4wa\_  
d1p37a\_ d1k28a3 d1xjta1 d1jtma\_ d2f2qa\_ d4e97a1 d1iyka2 d1rxta1  
d1iica2 d1iica1 d2za0a\_ d2c21a1 d1f9za\_ d1mpya2 d1kw3b2 d1kw3b1  
d4ghga1 d1tfza1 d3isqa1 d3isqa2 d1sqia1 d1sqia2 d1lkda2 d1lkda1  
d1mpya1 d1cjxa2 d1cjxa1 d1sp9b2 d1t47a1 d1t47a2 d1f1ua2 d1sp8a1  
d1sp8a2 d1etob\_ d1umqa\_ d1s5ja2 d1qhta2 d4dlea2 d1tgoa2 d3py8a2  
d1q8ia2 d1kfsa2 d2py5a2 d1d5aa2 d1qsta\_ d2beia1 d4m3sa\_ d1u6ma1  
d1ygha\_ d1yk3a1 d3dr6a\_ d1xmta\_ d1z4ea1 d2ge3a1 d1bo4a\_ d2fiaa1  
d2jdca1 d1y9wa1 d3to7a\_ d1wwza1 d2f14a1 d2ozua1 d2b5ga\_ d2cy2a1  
d2p0wa\_ d1cm0a\_ d4pswa\_ d1yrea1 d1yr0a1 d1m4ia\_ d2gana1 d1yvka1  
d1ghea\_ d2g3aa1 d1y7ra1 d2euia1 d1q2ya\_ d2fsra1 d1xeba\_ d2ae6a1  
d1cjwa\_ d1qsma\_ d2aj6a1 d1y9ka1 d1i12a\_ d1vkca\_ d2atra1 d1n71a\_  
d2d4pa1 d2fiwa1 d2fe7a1 d1tiqa1 d2ou2a\_ d1yx0a1 d2fcka1 d1p0ha\_  
d2j8ma\_ d2pq8a\_ d1z4ra1 d1s3za1 d1ufha\_ d2hqya1 d2hqya2 d1ne9a1  
d1lrza3 d1ne9a2 d1xvqa1 d1pn0a2 d3hy2a\_ d2cvba1 d1o8xa\_ d1lu4a\_  
d1we0a1 d2bmx1a1 d2a4va1 d1psqa\_ d1xiya1 d1q98a\_ d1n8ja\_ d1zofa1  
d2ggta\_ d3tjja\_ d4je1a1 d1o73a\_ d3s9fa\_ d2zcta\_ d1qmva\_ d2b1ka\_  
d5dvba1 d2b5xa1 d2v2ga\_ d1st9a\_ d3tb2a\_ d411ra\_ d4fh8a1 d1e2ya\_  
d1knga\_ d2h30a\_ d1i5ga\_ d2z9sa\_ d2f8aa1 d1tp9a1 d2b7ka\_ d1nm3a2  
d3hvva\_ d2wfca1 d4kcea\_ d1xvwa1 d4gqca1 d3qpma\_ d4k1fa\_ d1zzoal  
d1gp1a\_ d1prxa\_ d1e88a1 d1l6ja4 d1eaka4 d1eaka3 d1l6ja3 d1h8pa2  
d1h8pa1 d1ys1x\_ d4hs9a\_ d1ispa\_ d1ex9a\_ d1ku0a\_ d3qmma\_ d2h1ia1  
d2r8ba1 d3b5ea1 d3cn9a\_ d1lgya\_ d4l3wa\_ d1llfa\_ d1gz7a\_ d1lukca\_  
d1c4xa\_ d1j1ia\_ d2rhwa\_ d3groa\_ d1thta\_ d1ei9a\_ d2ftba\_ d1mpa\_  
d2rcqa1 d1fdqa\_ d4lkpa\_ d1sa8a\_ d1vyfa\_ d1lpja\_ d3vg7a1 d4azqa1  
d1o8va\_ d5bvqa\_ d1p6pa\_ d2qo4a\_ d1opba\_ d1yiva1 d1o1va\_ d4bvma1  
d4tkba\_ d4i3ba\_ d1bwya\_ d1ftpa\_ d1ggla\_ d4gkca\_ d3p6da1 d1kqwa\_  
d2a0aa1 d3zxha\_ d1cgl1a\_ d1rm8a\_ d1eaka2 d1hy7a\_ d2jsda\_ d1cxva\_  
d1hv5a\_ d1i76a\_ d3p0ya1 d1igra1 d1n8yc2 d1n8yc1 d1m6ba2 d1m6ba1  
d1m4la\_ d2bk7a\_ d3fjua\_ d1z5ra1 d1kwma1 d1uwya2 d1jqga1 d2c1ca1  
d1dtda\_ d1h81a2 d2tbvc\_ d1c8nc\_ d1x36a\_ d1smvc\_ d1ng0c\_ d4sbvc\_  
d1lopa\_ d1f2nc\_ d1cixa\_ d1y29a\_ d1v7fa\_ d2jtba\_ d1d1ha\_ d1g9pa\_  
d1qk7a\_ d1mb6a\_ d2a2va\_ d1niya\_ d1i25a\_ d1hvwa\_ d2mpqa\_ d1ie6a\_  
d1kqha\_ d1la4a\_ d2mxoa1 d1d10a\_ d1koza\_ d1qk6a\_ d1emxa\_ d1lqra\_  
d1c6wa\_ d1rmka\_ d1ixta\_ d1eyoa\_ d1cna\_ d1g1pa\_ d1f3ka\_ d1fyga\_  
d4lu0a\_ d1of8a\_ d3unda1 d3e9aa1 d1vr6a2 d1n8fa\_ d2qkfa\_ d1d9ea\_  
d1o60a\_ d1ny721 d1ny722 d1a6ca3 d1a6ca2 d1a6ca1 d1pgl22 d1pgl21  
d1pgl11 d1ny711 d1jgta2 d1ofda3 d1lea0a3 d1q15a2 d1ct9a2 d1ao0a2



d1te5a\_ d1y14b1 d2nn6i1 d1i941\_ d2zjra2 d1smxa\_ d2qamc2 d1hh2p1  
d2r7da1 d1rl2a2 d1wfga1 d3bzka4 d1x6oa2 d3a0ja\_ d2j01d2 d2ja9a1  
d4q15a\_ d1hr0w\_ d1luza\_ d2n3sa\_ d2vnud1 d1h95a\_ d1go3e1 d2nn6h1  
d1ne3a\_ d2mola\_ d1liz6a2 d1jjga\_ d1e3pa2 d2ix0a3 d2ix0a2 d2lxja\_  
d1ueba3 d1ueba2 d2z0sa1 d1u01a1 d2ix0a1 d2eifa2 d2je6i1 d3i2za1  
d2c35b1 d2ahob2 d1t9ha1 d3i4oa\_ d2qall1 d1jt8a\_ d2nn6g1 d1g6pa\_  
d3cama\_ d1c9oa\_ d1d7qa\_ d2ba0a1 d2vnud2 d2vnud3 d1khia2 d2qalq1  
d1wi5a1 d1xtda2 d1ny4a\_ d1eixa\_ d3exra\_ d2ffca1 d2fdsa1 d3n3ma1  
d2czda\_ d1q6oa\_ d2yyua\_ d1vqta1 d1dbta\_ d3ldva1 d2flia1 d1rpxa\_  
d1tqja\_ d1tqxa\_ d41t9a1 d3tc7a1 d3hoja\_ d1i4na\_ d3vnda\_ d3n18a1  
d1geqa\_ d3naval d1v5xa\_ d4a2ra1 d3tc6a1 d1ujpa\_ d4ijba\_ d1xcfa\_  
d1vc4a\_ d1rd5a\_ d1qopa\_ d3b5va\_ d2r80b\_ d1cqxa1 d1cg5a\_ d1gcvb\_  
d3boma\_ d2h8fb\_ d2raoa\_ d3bj1a\_ d4hrrb\_ d2r50a\_ d3d1kb\_ d2aalb1  
d3zhwa\_ d3hf4b\_ d3gdja\_ d1jebb\_ d3bj1b\_ d1x9fb\_ d1wmub\_ d1gcva\_  
d3bcqb\_ d3d4xb\_ d1gvha1 d2dc3a\_ d3hf4a\_ d4yu3a\_ d3k8ba\_ d1qpwb\_  
d2r80a\_ d3bcqa\_ d1v4wa\_ d3wtgb\_ d1j17a\_ d4esaa\_ d1a9we\_ d3d1ab\_  
d1fsla\_ d4h21a\_ d1v4wb\_ d1mwca\_ d1vhba\_ d1jeba\_ d1spgb\_ d1h97a\_  
d1q1fa\_ d1tu9a1 d3d1aa\_ d1hdsb\_ d3hyub\_ d2zffb\_ d3fs4a\_ d1oj6a\_  
d1shrb\_ d4h21b\_ d4yu3b\_ d1spga\_ d3hrwa\_ d3qgra\_ d3at5a\_ d4wchd\_  
d3hyua\_ d1cg5b\_ d1uc3a\_ d1hbra\_ d2raob\_ d1outb\_ d4esab\_ d3gdjb\_  
d3qqqa\_ d1x9fc\_ d3vrfa\_ d1litha\_ d3mkba\_ d3d4xa\_ d3mjpa\_ d1j16a\_  
d3fh9a\_ d1outa\_ d2dc3b\_ d1it2a\_ d3eoka\_ d3g46a\_ d1qpwa\_ d3vrfb\_  
d1ch4a\_ d1x9fd\_ d1hdsa\_ d2zfba\_ d3mkbb\_ d1or4a\_ d3wtga\_ d1a4fa\_  
d3fh9b\_ d3bomb\_ d3cy5a\_ d3at5b\_ d1x9fa\_ d2oifa\_ d4lmbx\_ d1cpcb\_  
d3v57a\_ d1kn1a\_ d1cpca\_ d4f0ta\_ d2vjha\_ d4po5b\_ d1eyxa\_ d1alla\_  
d4f0tb\_ d1b33b\_ d4h0mb\_ d1b33a\_ d2vjhb\_ d4lm6b\_ d2vmlb\_ d1allb\_  
d2vjta\_ d3dbja\_ d2vmla\_ d2vjtb\_ d4f0ub\_ d1f99b\_ d4rmpa1 d1liaa\_  
d1eyxb\_ d2uulb\_ d4lmsb\_ d4f0ua\_ d2bv8a\_ d1f99a\_ d2bv8b\_ d2c71b\_  
d3dbjb\_ d4rmpb1 d1b8da\_ d4h0ma\_ d3v57b\_ d1kn1b\_ d1liab\_ d2uula\_  
d2j96a\_ g1wh1.1 d2xqfa\_ d1ea5a\_ d1f6wa\_ d1dx4a\_ d1qe3a\_ d4qwwa\_  
d2ha2a\_ d3c8da2 d2pbla1 d1jkma\_ d1jjia\_ d1jjfa\_ d2i49a\_ d1nnfa\_  
d1xvxa\_ d1ursa\_ d1h3da1 d1iuda\_ d4m1va1 d1twya\_ d3e13x\_ d2nxoa1  
d4pfua\_ d3ttma\_ d1elja\_ d2qmwa1 d1us5a\_ d1y3na1 d1jeta\_ d1uqwa\_  
d4f19a1 d2esna2 d3thia\_ d3fasa1 d2uyeb\_ d2xwva1 d1r9la\_ d2fyia1  
d1pb7a\_ d2ozza1 d1sw5a\_ d1nh8a1 d1vr5a1 d2g29a\_ d1xs5a\_ d3lswa\_  
d2z23a\_ d3w9va\_ d3tcha\_ d1q35a\_ d1z7me1 d3q27a\_ d1p99a\_ d1ve4a1  
d2i6ea1 d4mcoa1 d4n8ya\_ d1eu8a\_ d1zba1 d1ixca2 d1j1na\_ d1xvya\_  
d1y9ua\_ d2z22a1 d1xoca1 d4oera\_ d1wdna\_ d5f1qa1 d1xt8a1 d1i6aa\_  
d4gwoa\_ d4igta1 d1pc3a\_ d4mmpa1 d1o63a\_ d2czla1 d2onsa2 d4mija1  
d4iuua3 d4bvva\_ d5hpga\_ d3k65a\_ d1ki0a3 d1ki0a2 d1ki0a1 d1a0ha1  
d1pmla\_ d3sp8a3 d2feba1 d1xova2 d1f74a\_ d3121a\_ d2e1da\_ d1to3a1  
d1w3ia\_ d1sfla\_ d1vcva1 d4imea\_ d1wa3a\_ d2ocza1 d1f2ja\_ d3m16a\_  
d2yxga\_ d1ub3a\_ d3a5fa\_ d1fbaa\_ d1l6wa\_ d1xfba1 d1wx0a1 d1vpxa1  
d1ojxa\_ d1mxsa\_ d2a4aa1 d1xkya1 d3cq0a1 d3s1xa\_ d1f05a\_ d1fdja\_

d3cpa1 d4d2ja\_ d1cg2a1 d1yloa2 d1y7ea2 d1y0ya3 d1lfwa1 d1vixa1  
d1fnoa4 d1vhoa2 d1ysja1 d1vhea2 d1z2la1 d2fvga2 d1r3na1 d2grea2  
d1xmba1 g1q7l.1 d1rtqa\_ d3rp2a\_ glucy.1 d1fuja\_ d2zchp\_ d3w94a\_  
d1si5h\_ d1lo6a\_ g2pka.1 d1cgha\_ d1kigh\_ d1a5ia\_ d3s9ba\_ d1hj8a\_  
d1ao5a\_ d2anya\_ d1q3xa1 d1gvza\_ d4gsoa\_ d2f91a1 dliaua\_ d1gdna\_  
d1eufa\_ g1fiw.1 d1eq9a\_ d4nfea\_ d2rdla\_ d1spja\_ d1elva1 d1a7sa\_  
d1ekbb\_ d1pfxc\_ d1yc0a\_ d2aiqa\_ g1fiz.1 d1fi8a\_ d4k60a\_ d4dgja\_  
d1mzaa\_ d1op0a\_ d3tjva\_ d1pytd\_ d1sgfg\_ g1gg6.1 d2eeka\_ g1rtf.1  
d1a0ja\_ d3g01a\_ d1pytc\_ d4e7na\_ d1ddja\_ d1z8ga1 d2hlca\_ d1npma\_  
d1brup\_ g1jou.1 d1sgfa\_ d1autc\_ g2hnt.1 g1kdq.1 d1orfa\_ d3s69a\_  
d4crga\_ d1fxya\_ d1bqya\_ d1svpa\_ d1mbma\_ d3su6a1 d1cula1 d4agka\_  
d1q31a\_ g1n1l.1 d3e90b\_ d1ep5a\_ d3u1jb\_ d1dzka\_ d4tlja\_ d2a2ua\_  
d4wfva\_ d3t1da\_ d4iaxa\_ d3zq3a\_ d2nnda\_ d1i4ua\_ d1kxoa\_ d1bbpa\_  
d1kt7a\_ d1exsa\_ d3s26a1 d1lf7a\_ d4gh7a\_ d1z24a1 d1qabe\_ d1xkia\_  
d1ew3a\_ d3bx7a\_ d4iawa1 d1n0sa\_ d1gkab\_ d3kzaa\_ d2k23a\_ d2l9ca1  
d2joza1 d1gm6a\_ d3kffa\_ d3saoa1 d1e5pa\_ d1yupa1 d1iia\_ d3lgia\_  
d3i77a\_ d2z9ia2 d4nsva\_ d1lcya2 d4jcna\_ d1agja\_ d1os8a\_ d1hpga\_  
d1p3ca\_ d1l1ja\_ d1qtfa\_ d1e69a\_ d1mv5a\_ d3g60a4 g1ii8.1 d1ewqa2  
d1ji0a\_ d1qhla\_ d1v43a3 d2wmfa1 d1vpla\_ d1g2912 d4a82a2 g1f2t.1  
d2d62a1 d3tuic1 d2bbsa1 d3g60a3 d2ixea\_ d1g6ha\_ d1sgwa1 d2qi9c\_  
d3r1fa1 d3b60a1 d3d31a2 d2pzea1 g1xew.1 d1jj7a\_ d1loxxk2 d2onka1  
d1wlwa\_ d1iwea\_ d1qf5a\_ d1vmaa2 d1nija1 d1np6a\_ d2p67a1 d3ihla\_  
d1okkd2 d1l1sa2 d1s1ma2 d1liona\_ d2v40a\_ d1dj3a\_ d3hida\_ d2vola1  
d2g0ta1 d1vcoa2 d1j8mf2 d1g3qa\_ d1xjca\_ d1p9ba\_ d1qzxa3 d1ihua2  
d1ihua1 d2qm8a\_ d1dj2a\_ d4ioja\_ d1cp2a\_ d1yrba2 d3gqba2 d1skye3  
d1xp8a1 d1tf7a2 d1tf7a1 d1ye8a1 d1skyb3 d2qe7d2 d4blta\_ d4huta\_  
d3l1daa2 d4hyya\_ d2i3ba1 d1crla\_ d3j9tb2 d3ntua2 d1vdza1 d2z43a\_  
d1e9ra\_ d1nlfa\_ d3ziaa2 d1n0wa\_ d3ziad2 d3j9ta2 d1pzna2 d3gqbb2  
d1g19b1 d1gkub1 d4ok5a1 d2bmfa1 d2bmfa2 d1yksa1 d1yksa2 d1jr6a\_  
d2qeqa1 d2j1qa1 d1a1va2 d1eh3a\_ d3skpa\_ d1dtza2 d1ieja\_ d1jnf2  
d1ce2a1 d1jnf1a1 d1b1xa2 d1b1xa1 d1jw1a1 d1jw1a2 d1ryoa\_ d1h76a1  
d1h76a2 d1c4oa1 d2p6ra3 d2p6ra4 d1oywa2 d1oywa3 d1wrba1 d1w36b2  
d1w36b1 d1c4oa2 d3bora\_ d1t6na\_ d2eyqa5 d2eyqa3 d2eyqa2 d2zu6a2  
d1veca\_ d1uaaa1 d1w36d1 d2g9na1 d1z3ix2 d2rb4a\_ d1hv8a1 d1t5ia\_  
d1w36c2 d2j0sa2 d2j0sa1 d1fuka\_ d3hjha1 d1z5za1 d1qdea\_ d1z63a1  
d1s2ma2 d1s2ma1 d1wp9a1 d1wp9a2 d1gm5a3 d1gm5a4 d3dina4 d3dina3  
d1q0ua\_ d1w36c1 d1z3ix1 d1nkta3 d1nkta4 d1uaaa2 d1w36d2 g1qhh.1  
d2fwra2 d2fwra1 d2fkza\_ d1zuj1a1 d1s3qa1 d2fjca1 d1z6om1 d1veia\_  
d4dyya\_ d1jiga\_ d3gvya\_ d2pyba\_ d4cy9a1 d3bvfa1 d1r03a\_ d2cf7a\_  
d1nf4a\_ d1zs3a1 d4iwka\_ d3ka8a\_ d3np0x\_ d1n1qa\_ d1lb3a\_ d4e6ka\_  
d1z6oa1 d2fzfa1 d4dyua\_ d3ge4a\_ d1jgca\_ d4am4a\_ d2z6ma\_ d1ji5a\_  
d1vlga\_ d1lkoa1 d1krqa\_ d3qz3a\_ d1o9ra\_ d2ffxj\_ d1euma\_ d1yv1a1  
d2v2pa\_ d1j30a\_ d4di0a\_ d1dpsa\_ d1oewa\_ d2qzxa\_ d2asia\_ d1psoe\_  
d1smra\_ d2h6ta\_ d1pfza\_ d1lizda\_ d3hd8a\_ d1j71a\_ d1dpja\_ d4aa9a\_

d1t6ex\_ g1b5f.1 g1lya.1 g1htr.1 d1qdma2 d1bxoa\_ d1wkra\_ d1tzsa\_  
d1libqa\_ d2qzwa\_ d1zoya1 d1qo8a2 d1d4ca2 d1chua2 d1jnra2 d1sr9a2  
d1rqba2 d1k8rb\_ d1wgra1 d1ef5a\_ d1wfyfa1 d1e8ya3 d1wgya1 d1l1fda\_  
d2cs4a1 d1wxma1 d2byeal d3kh0a1 d2byfa1 d1wxaa1 d1e7ua3 d1wgda1  
d1wggal d4q5eb\_ d1wjna1 d1se9a\_ d3n3kb\_ d1wz0a1 d1we6a1 d2m0xa\_  
d2gbka\_ d3rt3b1 d1wh3a1 d1sifa\_ d2ekec2 d4ii2b1 d4hk2a1 d1c3ta\_  
d1wgha1 d1ttna1 d1j8ca\_ d1wx8a1 d3v6cb1 d2ma9b\_ d4i6lb1 d1bt0a\_  
d2jvca1 d1iyfa\_ d2k1fa\_ d1wxva1 d1wf9a1 d1t0ya\_ d2io0b2 d1x1ma1  
d2gbma\_ d1zw7a1 d2m17a\_ d1ud7a\_ d1we7a1 d2l1wpa\_ d2gbja\_ d1wjua1  
d1v6ea1 d1v86a1 d4eewa\_ d1wiaa1 d4icva\_ d4gu2a\_ d1wx7a1 d1wy8a1  
d4hjkal d2faza1 d1v5oa1 d3ruib\_ d1leo6a\_ d3waob\_ d2r2qa1 d3m95a\_  
d3wana\_ d2a13a1 d2cr5a1 d1wj4a1 d1s3sg\_ d1ps9a2 d1o94a2 d1l1qta1  
d1cjca1 d2dara2 d2dara1 d1wyha2 d2d1oa2 d1rutx4 d1rutx3 d2cuqa2  
d1x41a2 d1x41a1 d1x3ha2 d1x3ha1 d2d8za1 d1x61a2 d1x6aa1 d1x6aa2  
d2cora2 d2cora1 d1v6ga1 d1v6ga2 d2d8za2 d1x64a1 d1x64a2 d1b8ta1  
d2co8a1 d1x63a2 d2dj7a2 d2dj7a1 d2cu8a2 d2cu8a1 d1g47a1 d1j2oa1  
d1wyha1 d2d1oa1 d1wiga1 d1wiga2 d2cupa2 d2cupa3 d1x68a1 d2d8ya2  
d2d8ya1 d1m3va2 d1x62a1 d1x68a2 d1x61a1 d1b8ta3 d1b8ta2 d2d8xa2  
d2d8xa1 d1x4ka1 d1x4ka2 d2cuqa1 d1m3va1 d2co8a2 d1j2oa2 d1x63a1  
d2cura1 d2cura2 d1x62a2 d1wioa4 d1ccza2 d1vcaa1 d1dr9a2 d1c1a1  
d2d9qb1 d2nxyb2 d1um8a\_ d1lixza\_ d1qvra2 d1qvra3 d1qzma\_ d1sxjc2  
d1jr3d2 d2p65a\_ d1l8qa2 d3hu3a3 d1sxjd2 d1njfa\_ d1in4a2 d1sxja2  
d1tuea1 d2ce7a2 d1w5sa2 d1sxjb2 d1d2na\_ d1ny5a2 d1ofha\_ d2gnoa2  
d2a5yb3 d1fnna2 d1u0ja1 d1lv7a\_ d1iqpa2 d2fnaa2 d1lixsb2 d4gita\_  
d1sxje2 d1g41a\_ d3ia2a\_ d1a88a\_ d4dgqa1 d1zoia\_ d2k4ua\_ d1hp2a\_  
d2lu9a\_ d1baha\_ d2meoa1 d1wm7a\_ d1hlya\_ d1jlza\_ d1wpda\_ d1c55a\_  
d1pvza\_ d1wt7a\_ d1rjia\_ d1wz5a\_ d1m2sa\_ d1pjva\_ d1c49a\_ d1qkya\_  
d2ktca1 d1wmta\_ d1du9a\_ d1j5ja\_ d1rlga\_ d1t0za\_ d2i61a\_ d1t1ta\_  
d1sn4a\_ d1kv0a\_ d2l1kba\_ d1npia\_ d1wwna\_ d1pe4a\_ d2kbka\_ d2li7a\_  
d2kbha\_ d1dq7a\_ d1sega\_ d1omya\_ d1zywa1 d1jzaa\_ d1bvsa3 d1iyjb4  
d1iyjb5 d1iyjb3 d1o7ia\_ d4ipca1 d1x3ea\_ d4apva\_ d1jb7a1 d1jb7a2  
d1jb7a3 d3kdfa\_ d1uelb\_ d1wjja1 d3eiva\_ d1xjva2 d1xjva1 d2ccza2  
d1se8a\_ d1l1loc\_ d1jb7b\_ d1qvca\_ d3ulla\_ d1qzga\_ d1miua4 d1miua5  
d1miua3 d3g48a1 d1gd7a\_ d1mkha\_ d1jjcb3 d3ubub\_ d1legia\_ d1qo3c\_  
d1v7pa\_ d1tdqb\_ d3ubua\_ d1c3ab\_ d1h8ua\_ d3bx4b\_ d1t8ca1 d1sb2a1  
d1qdda\_ d2ziba1 d3cada\_ d1byfa\_ d1j34b\_ d1jwia\_ d1jzna\_ d1c3aa\_  
d1oz7b\_ d1wmza\_ d3bdwb\_ d1hq8a\_ d1fifa1 d3hupa\_ d1wk1a1 d1lumra\_  
d2afpa\_ d3bx4a\_ d1gz2a\_ d1sl6a\_ d1v7pb\_ d3g8ka\_ d1lixa\_ d1j34a\_  
d1jwib\_ d1g1sa1 d1y17a1 d1ja3a\_ d1fvub\_ d3bdwa\_ d1sb2b1 d1fvua\_  
d1umrc\_ d1oz7a\_ d4m17a\_ d3cfwa1 d1ypqa1 d1g1ta1 d3fd4a\_ d3l9jc\_  
d4dn8a1 d1v41b\_ d1rd11\_ d2msba\_ d1prtc2 d1prtb2 d1xwdc1 d3kj4a\_  
d1ozna\_ d1w8aa\_ d2ifga3 d1xkua\_ d1rpma\_ d2shpa1 d1yfoa\_ d1l8ka\_  
d2ooqa1 d1g4us2 d1p15a\_ d1lara2 d1lara1 d1wcha\_ d2fh7a2 d2fh7a1  
d3azya\_ d3wvja\_ d1upsa1 d1ajoa\_ d2hyka\_ d1ajka\_ d2vy0a\_ d1o4ya\_

d3o5sa\_ d3d6ea\_ d3atga\_ d1dypa\_ dlumza\_ d3i4ia\_ d4lbqa\_ d1a78a\_  
d1slta\_ d4no4a\_ d3zsja\_ d3duia\_ dl986a\_ dlis3a\_ dlqmja\_ dlhlca\_  
g1qmo.1 g1len.1 d3zyra\_ d1fnya\_ d1n47a\_ g2ltn.1 d1avba\_ d3usua\_  
d1dhkb\_ d1f9ka\_ dlukga\_ dl98wa\_ dl99fa\_ d1wbfa\_ d3wcsa\_ dl97ya\_  
g1loe.1 d1mvqa\_ dlhq1a\_ d1v6ia\_ d1dbna\_ d1qnwa\_ d4l8qa\_ dl1oaa\_  
d3n35a\_ d2h0ba\_ d2erfa\_ d1h30a2 d1h30a1 d3mw4a1 d1pz7a\_ d2r1ba\_  
d3v64a1 d1d2sa\_ d3bopa1 d3mw3a1 dl0kqa1 d1dszb\_ d1a6ya\_ d3cbba\_  
d1ynwa1 d1r4ia\_ d1hcqa\_ d2hana\_ d2hanb\_ d2enva1 d1kb4b\_ d2n11b\_  
d1cita\_ d1adqa1 d1fnga1 d1uvqb1 d1zs8a1 d2vola1 d2vola2 d1mfbl2  
d2jelh2 d1uwel2 d3qq4b1 d1kjbv\_ d1k5na1 d1osph2 d4odh12 d1ow0a1  
d1ow0a2 d1bfob2 d3l9ra2 d3jtth1 d2fath2 d4elkb2 d1fn4b2 d2xfxb\_  
d1pg7x2 d1cqka\_ d4k71b2 d11k2a1 d1eapb2 d4lfhg2 d1i4fa1 d2nw2a2  
d1kfah2 d1mhca1 d1h3ua1 d1wejh2 d1h0db2 d1a5fh2 d1kcvh2 d1mjuh2  
d1qqda1 d1kcrh2 d1k8ia1 d3huja2 d2nnab1 d1nfd2 d3mffb2 d1s9va1  
d11k3h2 d1q0x12 d1fv1b1 d1neza1 d4rfeb2 d1r3ha1 d1a6tb2 d1kjva1  
d1pz5b2 d1onqa1 d2bc4a2 d1de4a1 d1k8da1 d1tcra2 d1dn0b2 d1nfd2  
d2xwtb2 d1bfoa2 d1mexh2 d1iakb1 d1ypzf2 d4f7ea2 d1q7212 d2fbjh2  
d1fe8h2 d1clzh2 d1fngb1 d1uvqa1 d1vgka1 d1c16a1 d4j12a2 d4x99b2  
d1igtb3 d1je6a1 d1q72h2 d1nldh2 d1teth2 d2hmic2 d1i1ca2 d1i1ca1  
d1k8ib1 d1q0yh2 d1kfa12 d3frua1 d1pg7w2 d1u58a1 d1igyb4 d1igyb3  
d1hyrc1 d1klub1 d1deeb2 d1c12b2 d2bc4b2 d2ig2h2 d1kcv12 d3wn5b1  
d11k2b\_ d11k312 d1mjul2 d1sm3h2 d1q0xh2 d1zvsa1 d1ydpal d1u8ib2  
d1ypze2 d1kcu2 d1op9a\_ d1y01a1 d1letzb1 d1egj11 d2gsib1 d1nj9a1  
d4jfh1 d1aqk11 d1t2ja\_ d1lo4h1 d1zvya1 d3v4v11 d4enec1 d1kxtb\_  
d5e8ea1 d2pxya\_ d4weud\_ d1xiwc\_ d2esvd1 d1qnzh\_ d1ogae1 d1f4xh1  
d4n1hb\_ d3ezjb1 d3mlw11 d1kfah1 d1letza1 d1b4jh1 d3cfic\_ d4w68a\_  
d2arja1 d1ek3a\_ d2ok011 d1vera\_ d1uwgh1 d1blnb1 d1fpth1 d1rzga1  
d2giya1 d4m3kb1 d1nc2a1 d2nyyd1 d1ncna\_ d1fbih1 d5dxwa\_ d4fqqa1  
d1dqdh1 d1jfq11 d1kelh1 d1faih1 d1frgl1 d1figl1 d4m6n11 d1fo0a\_  
d4hxb11 d3b5ga\_ d3quyd1 d2h9gb1 d1i8kb\_ d2dd8h1 d2ck0h1 d1eaja\_  
d4w6wb1 d2a6ib3 d1t66d1 d2e27h\_ d1ob1b1 d1f11b1 d2v7na1 d2xt1b1  
d1pskh1 d4i13b1 d2op411 d1a0q11 d1uwel1 d1za3a1 d1ncb11 d4uu9a\_  
d1bm3h1 d1cloh1 d1nqba2 d1cf8h1 d4y5va\_ d1mhph1 d5anma1 d4cdgc1  
d4ldeb\_ d1y01b1 d2pcpb1 d1z3g11 d1dfb11 d1fh5h1 d3g5xa1 d1tzib1  
d4dn311 d3zhka1 d2b1hh1 d2uyla1 d1f3dh1 d1nj9b1 d2agjh1 d2h1p11  
d1q72h1 d8fabb1 d1ndmb1 d1rjca1 d4u6hb1 d3upca\_ d2fbj11 d1osph1  
d1tvda\_ d2cjh\_ d4fhbd1 d1bd2d1 d1rz7h1 d3nn8a\_ d1blna1 d1knoa1  
d1nfd1 d2bmkb1 d1dq11\_ d1igyb1 d1igf11 d12e8h1 d3utza1 d1nc2b1  
d1rihh1 d4mwfb1 d4jvpa1 d1mieh1 d1rhfa1 d1fgn11 d1sbsh1 d1lp9e1  
d1dn0a1 d4lqf11 d1iaih1 d1kgcd1 d1mh5b1 d1gpo11 d2g60h3 d1f8t11  
d2jixd1 d4grwh\_ d1fo0b\_ d1bfob1 d1axsa1 d1u9ka\_ d1nmbh\_ d1h8na1  
d1h8na2 d1jguh1 d4eura1 d3sdy11 d35c8h1 d1w7211 d1mvub\_ d1i9rh1  
d1ob1a1 d4wenb\_ d1yeeh1 d3ietc1 d1f58h1 d1ad0b1 d1mqk1\_ d1nbvh1  
d4b50a\_ d3r8bb\_ d1baf11 d1mamh1 d4rgne1 d2gsgb\_ d35c811 d1bafh1

d1ai1h1 d2pcpa1 d2fath1 d2x1pa\_ dlorsb1 dlibgl1 dlshma\_ d1a2yb\_  
d1u0qa\_ d2coqa\_ d1hilb1 d1qfwi\_ d1jv5b\_ d1fn4b1 d5e0qa\_ d1nsnh1  
d1plgl1 d4ocxl1 d1kb5h1 d1rzfh1 d1pg7x1 d2fx7h1 d2oi9c\_ d1l7i11  
d3eyva1 d1d5i11 d4ffyl\_ d1tetl1 d1a6wh\_ d1ac6a\_ d3dvfa\_ d1nfdel  
d1mimh1 d1ri8a1 d1jhlh\_ d3dura\_ d1fskb1 d1f97a1 d3so3b1 d2ak4d1  
d1lp9f1 d4z7wf1 d1l7th1 d4y5ya\_ d4x7ec1 d1emth1 d1ikfl1 d1nlbh1  
d4utal1 d1bjma1 d1eapb1 d1u6ah1 d2dtgd1 d1kj2b\_ d1xeda1 d1c1eh1  
d1fgvh\_ d2bnub1 d2fb4h1 d2dtgb1 d1ktrh\_ d1jpth1 d1qkzl1 d4hepg\_  
d2atpb1 d1flrh1 d2hrpl1 d1mvfa\_ d1iaim1 d3k80a1 d2jb5h1 d3zkxc\_  
d4grwe\_ d1it9h1 d1rhhb1 d3w9ec\_ d1e4wh1 d1sy6h1 d2j6eh1 d3qxta\_  
d1jglh1 d1p7ka1 d1tzhb1 d4n8pa1 d1gaf11 d2jelh1 d1wioa2 d4i0cc1  
d1cicb1 d1lmka2 d1lmka1 d1iqwh1 d1orqb1 d1ejoh1 d1jnlh1 d4zga\_  
d43c9b\_ d1ggbl1 d1wejh1 d3q6fa1 d1f3dj1 d3c6la1 d1bqlh1 d3p9wb\_  
d1a3r11 d1h0db1 d2uzil\_ d1eo8l1 d1qfwl\_ d1n7ml1 d1igja1 d1c5ch1  
d2a9mh\_ d1rmfh1 d1fj1b1 d4heme\_ d1ccza1 d1a5fh1 d1ogad1 d1dlfh\_  
d1qa9b\_ d1vgel1 d3qskb\_ d1sjxa\_ d4ozfg1 d1sq2n\_ d1qd0a\_ d1kcvh1  
d1c5db1 d3qcul1 d8faba1 d3bn9d1 d1mjuh1 d4y8dc\_ d7fabh1 d3dvgb1  
d1lo0l1 d1a6tb1 d1gigh1 d1kcrh1 d2hwz11 d1yjdc1 d3clfl1 d4krna\_  
d1d17l\_ d1e6ol1 d1mexh1 d3r0ma\_ d4kkna\_ d1fns11 d1loaqh\_ d1rzia1  
d1lucbh1 d1ncw11 d4b41a\_ d1nfdfl d2mpah1 d2d7t11 d4grwf\_ d4b5ea\_  
d1lk3h1 d3u79a\_ d4u3xa\_ d1ghfl1 d1bvkb\_ d1mcww1 d1b88a\_ d1jrhh1  
d32c2b1 d4wemb\_ d1dsfh\_ d1op3h1 d1cell1 d1iqda1 d1qoka1 d1qoka2  
d1qfuh1 d2crya1 d1ay1h1 d1loaql\_ d3ab0b\_ d1rurl1 d1t4kb1 d1bz7b1  
d1n0xh1 d1for11 d1lucbl1 d4w6yb\_ d43c9a\_ d2aab11 d1tzia1 d4n1ca\_  
d1k6qh1 d3g9ab\_ d4tvsa1 d1igmh\_ d1pz5b1 d3dx9a1 d3wxwh\_ d1nakh1  
d1kcul1 d3eaka\_ d4qlra1 d1cr9l1 d1d9ka\_ d1f4xl1 d1deea1 d2i27n2  
d1c12a1 d2orbl1 d1j8hd1 d1mcph1 d1c5da1 d1kenh1 d1bd2e1 d1h5ba\_  
d4x7fc1 d3upaa\_ d1t3fa1 d1indh1 d2dtgc1 d4hc111 d1zv5a1 d4wgvb\_  
d1uwgl1 d4f37k1 d1aqkh1 d1vesa\_ d3zkqd\_ d1fpt11 d1lo4l1 d1knob1  
d3rrqa\_ d1ct8b1 d4orzc\_ d1mlbb1 d4hgkc1 d1dqd11 d1bogb1 d4ozhe1  
d1dr9a1 d1i7za1 d1dn0b1 d1kell1 d1rzib1 d1ypzf1 d1wtla\_ d1hkfa\_  
d1fail1 d1figh1 d2vyre\_ d1sjva\_ d1ohqa\_ d1bfoa1 d1pkqb1 d1mjul1  
d1b4jl1 d1nsn11 d2arjb1 d1p4bh\_ d4aj0a\_ d3nn8b\_ d2rcja1 d1f2xk\_  
d4v1dd\_ d1adqh1 d2eksa\_ d4k3ga\_ d1jfqh1 d1uweh1 d1frgh1 d4gftb\_  
d1uz8b1 d4nlea\_ d1bm3l1 d1clol1 d3mcka1 d2vq1a1 d1ae6h1 d4aq1b1  
d1uj3b1 d1nbqa1 d1fh5l1 d2ck0l1 d2ywza\_ d1q72l1 d4nbxb\_ d1hila1  
d4hzb1 d2j88l1 d1zmya1 d1cd0a\_ d1a4ka1 d1pskl1 d1a0qh1 d4krmb\_  
d1ncbh1 d2fbjh1 d1j8he1 d1i3ua\_ d1cf8l1 d1fe8h1 d2plya1 d1leeqa\_  
d2x89a\_ d1ol0a\_ d2r0lh1 d1ub5a1 d1dfbh1 d3eyvb1 d4jdvb1 d4p2cg\_  
d2gsia1 d2agjl1 d1u3ha1 d2h1ph1 d1rih11 d1fskc1 d1boga1 d2a77l1  
d1osp11 d1qfoa\_ d3dwta\_ d2fx7l1 d1rz7l1 d3stba1 d1pkqa1 d1b6da1  
d1dzba2 d1dzba1 d1kj2a\_ d4l1ha\_ d1rzgb1 d1dqlh\_ d12e8l1 d1miel1  
d1jmaa\_ d1sbs11 d1fgnh1 d1f58l1 d1mqkh\_ d1ndgb1 d3qegl1 d1iail1  
d2aw2a1 d1tqbc1 d3fo2a1 d4dkaa\_ d1f8th1 d2g60l1 d2ywy\_ d1uj3a1

d1yc7a\_ d3bd3a\_ d4w6xb1 d1nmb1\_ d1i8ka\_ d1rjlb1 d1ypze1 d1p7kb1  
d1kxqe\_ d1gpoh1 d2z4qa1 d1w72h1 d1i9rl1 d4qgya1 d4xt1c\_ d2qqnh1  
d1cica1 d3c08h1 d2cd0a\_ d2bdnh1 d1hnga1 d1maml1 d1nldh1 d1cr9h1  
d41cih1 d3bkyh1 d3qg7l1 d1ai1l1 d1kxvc\_ d4iosd\_ d1l7ih1 d2x1qa\_  
d1ub6b1 d3k74b\_ d1ibgh1 d1teth1 d1igya1 d1hxma1 d2x6ma\_ d2e7la\_  
d5e03a\_ d1qfwm\_ d2r0kh1 d1igjb1 d1rurh1 d1plgh1 d1mj8h1 d1yuhb1  
d3fmg11 d1rzfl1 d1emt11 d1ad9b1 d1igtb1 d1nlb11 d1d5ih1 d3k7ua\_  
d4ffyh\_ d1bwwa\_ d3dvga1 d1a6ta1 d1fgvl\_ d4qxgl1 d1mim11 d1jhl1\_  
d2hffb1 d2hh0l1 d1qkzh1 d1l7t11 d1afvh1 d1iaii1 d2cjuh\_ d1um5h1  
d2ghwb2 d2ghwb1 d1kgce1 d2fgwh1 d1ikfh1 d1dvfd\_ d2i24n1 d2xtjb\_  
d1za3b1 d2yc1a\_ d2hh0h1 d2x1oa\_ d1bvka\_ d1rjla1 d5e7ba1 d1igta1  
d1il1b1 d2fb4l1 d1mvua\_ d1jpt11 d32c2a1 d1fvca\_ d1iqdb1 d2hrph1  
d2p4ab\_ d4qo1a\_ d1p2cb1 d1wt5c\_ d1t4ka1 d5c1mb\_ d1it9l1 d1bz7a1  
d1b2wh1 d1e4wl1 d1jnl11 d1yedb1 d1za6b1 d3u7aa\_ d1igfh1 d3gnm11  
d1orsa1 d1wejl1 d1a2ya\_ d1hxmb1 d1gafh1 d2j4wh1 d1pz5a1 d1j05a\_  
d1a3rh1 d4fq1l1 d1qfwh\_ d1eo8h1 d1n7mh1 d4s11a\_ d1kegh1 d5da4a\_  
d1iqw11 d3whxb1 d1vgeh1 d1deeb1 d1c12b1 d1t2ql1 d1ad9a1 d3gsnb1  
d3b2uc1 d1ggbh1 d1t3fb1 d1nakl1 d4ocmc\_ d1lila1 d2v7hb3 d2esvel  
d1mcoh1 d2qr0b1 d2q3aa\_ d1ct8a1 d1kcr11 d2pxyb\_ d2uzih\_ d5c3ld\_  
d3durb\_ d1c5cl1 d2ak4e1 d1d17h\_ d1xiwd\_ d1mlba1 d1rmfl1 d1i7zb1  
d1dlfl\_ d2xa3a\_ d5bq7b1 d1dqqb1 d3h42l1 d1egjh1 d1kcv11 d1fe8l1  
d2j6e11 d1f3rb2 d1l1k3l1 d1sm3h1 d1q0xh1 d1ghfh1 d7fabl1 d1igch1  
d1l00h1 d4idla\_ d5c2b1\_ d1jrh11 d1l11a1 d3zhda1 d4kfzc\_ d1b0wa\_  
d1e6oh1 d1mex11 d4krpb\_ d1fnsh1 d1ncwh1 d4hgma\_ d4eigb1 d4rzca\_  
d2mpa11 d4y5xa\_ d5en2b1 d3lrga1 d4ej1c1 d1rhha1 d1j05b\_ d1forh1  
d1q9wb1 d2wzpd\_ d2aq2a1 d1h0da1 d3revb1 d2ij0c1 d1tzh1 d4m7j11  
d1k6ql1 d3b9kc1 d1igml\_ d3qeua1 d1dsfl\_ d1celh1 d1kcuh1 d1zvha1  
d1zvoa1 d1tqbb1 d1ay1l1 d2qscl1 d2cgrh1 d1nl0h1 d1ken11 d3eo0a1  
d4n9ob1 d1n0xl1 d3k1kc\_ d1d4ua2 d2aq2b1 d1ck1a1 d1enfa1 d1i4pa1  
d1v1oa1 d1et9a1 d1esfa1 d2g9hd1 d4ohja1 d1klud1 d1bxta1 d1eu3a1  
d1ty0a1 d1fnua1 d2cqva1 d1fhga\_ d2k1ma\_ d2dl2a1 d1biha3 d1biha1  
d1biha4 d3qp3a1 d1g1ca\_ d1gxea\_ d1cvsc2 d1cvsc1 d1xmwa2 d1m4ka2  
d2otpa2 d1biha2 d1rhfa2 d2fcba2 d2fcba1 d1wwbx\_ d1gsma2 d1epfa1  
d1epfa2 d2dava1 d1waaa\_ d1f97a2 d1x44a1 d1vcaa2 d1fnla2 d1fnla1  
d3b5ha2 d3h8na2 d3h8na1 d1jbja1 d1jbja2 d1pd6a\_ d1f2qa2 d1f2qa1  
d3cx2a\_ d1nbqa2 d3b5ha1 d1n26a1 d1xiwb\_ d1xaua\_ d1fltx\_ d2ifga1  
d1olla1 d1olla2 d1cs6a4 d1cs6a3 d1cs6a2 d1cs6a1 d2gw5a2 d1sy6a1  
d1xiwa\_ d1lucta2 d1lucta1 d1ry7b2 d1gl4b\_ d1qz1a3 d1olza1 d2c9aa1  
d1wwca\_

**Family-5 (a.22.1.1)**

**Positive dataset contains 12 protein sequences.**

d3a6na\_ d4m6ba2 d2nqbd\_ d3wkjd\_ d2yfwe\_ d4h9na\_ d5bnxa\_ d3r45a\_  
d4jjnb\_ d4wnnb\_ d1u35c1 d2nqbc\_

**Negative dataset contains 4031 protein sequences.**

d1m32a\_ d1libja\_ d1c7na\_ d1liuga\_ d4q75a\_ d2bkwa1 d1t3ia\_ d1qz9a\_  
d1jf9a\_ d1leg5a\_ d1p3wa\_ d3kgwa\_ d1c11a\_ d2ctza1 d1vjoa\_ d2rfva\_  
d1gc0a\_ d1cs1a\_ d1d2fa\_ d2ch1a1 d1qgna\_ d1pffa\_ d1elua\_ d1u08a\_  
d11c5a\_ d1b5pa\_ d2ay1a\_ d1bw0a\_ d3pd6a\_ d2csta\_ d1j32a\_ d1fg7a\_  
d4wlha\_ d1o4sa\_ d1v2da\_ d1gdea\_ d1m6sa\_ d1v72a1 d1svva\_ d1ajsa\_  
d1wsta1 d2f8ja2 d11k9a\_ d1vp4a1 d1xi9a1 d2gb3a1 d1yaaa\_ d2bnma2  
d3rcha\_ d3k40a\_ d1pmma\_ d2cfba1 d1dfoa\_ d1o69a\_ d1bj4a\_ d3k28a\_  
d2bwpa\_ d3lg0a\_ d2fnua\_ d3ou5a\_ d1z7da1 d1b9ha\_ d1iaya\_ d4msoa\_  
d1bs0a\_ d1s0aa\_ d1sffa\_ d3tqxa\_ d1mdoa\_ d3qboa\_ d3pgya\_ d1bjna\_  
d2dkja\_ d1ejia\_ d1vefa1 d4wxga\_ d3bs8a\_ d3gbxa1 d1w23a\_ d2b5aa1  
d2ofya1 d4mcxa\_ d2xi8a\_ d2icta\_ d2bnma1 d2ppxa1 d1y7ya1 d1r0ka3  
d1j5pa3 d1vkoa2 d1vm6a2 d3qvsa2 d1p1ja2 d1f56a\_ d1bypa\_ d1azca\_  
d1ws8a\_ d3u25a\_ d1cuoa\_ d1rkra\_ d2iaac\_ d4dp1x\_ d1nwpa\_ d2gima\_  
d2i7sa\_ d1qhqa\_ d1gyca3 d1hfua2 d1kbva1 d1kbva2 d1sdda1 d1sdda2  
d1gyca1 d1gyca2 d1mzya1 d2bw4a1 d1aoza1 d1aoza2 d1kyaa2 d1kyaa3  
d1kyaa1 d1mzya2 d4e9sa1 d1sddb1 d1sddb2 d1hfua1 d1hfua3 d1oela2  
d1oela1 d1v10a2 d1v10a3 d1v10a1 d2dara2 d2dara1 d1wyha2 d2dloa2  
d1rutx4 d1rutx3 d2cuqa2 d1x41a2 d1x41a1 d1x3ha2 d1x3ha1 d2d8za1  
d1x61a2 d1x6aa1 d1x6aa2 d2cora2 d2cora1 d1v6ga1 d1v6ga2 d2d8za2  
d1x64a1 d1x64a2 d1b8ta1 d2co8a1 d1x63a2 d2dj7a2 d2dj7a1 d2cu8a2  
d2cu8a1 d1g47a2 d1g47a1 d1j2oa1 d1wyha1 d2dloa1 d1wiga1 d1wiga2  
d2cupa2 d2cupa3 d1x68a1 d2d8ya2 d2d8ya1 d1m3va2 d1x62a1 d1x68a2  
d1x61a1 d1b8ta3 d1b8ta2 d2d8xa2 d2d8xa1 d1x4ka1 d1x4ka2 d2cuqa1  
d1m3va1 d2co8a2 d1j2oa2 d1x63a1 d2cura1 d2cura2 d1x62a2 d1iknc\_  
d3brda1 d1p7h11 d1oy3c\_ d1imhc1 d1gjia1 d1zk9a1 d2cxka1 d3sxwa1  
d4luka\_ d4qgna\_ d1vr3a1 d2bema\_ d1pama1 d1ea9c1 d1qhoa1 d2fhfa2  
d2fhfa1 d1k3ia1 d1cxl1a1 d2bhua1 d1edqa1 d1flsa2 d1lut9a2 d1gvia1  
d1txka1 d1zx5a1 d1qwra\_ d2phla2 d2phla1 d1fxza2 d1fxza1 d1lrha\_  
d1uija1 g1dgw.1 d2v09a\_ d1uika2 d1uika1 d1dgwa\_ d1ep0a\_ d2pa7a1  
d1wlta1 d2c0za1 d1ds6b\_ d1fstb\_ d1ju8a\_ d4alac\_ d1rera1 d1s6na\_  
d3uzqb\_ d2bjca1 d2hsga1 d1qpza1 d1efaa1 d1au7a2 d1lic8a2 d2ovga\_  
d1sq8a\_ d1rzsa\_ d3kz3a\_ d3orca\_ d3gpdg2 d2q49a2 d1hdgo2 d2g17a2  
d2cvoa2 d2czca1 d3pwka2 d1obfo2 d1i32a2 d1zyao2 d2pkqo2 d1b7go2  
d2hjsa2 d1cf2o2 d1vkna2 d1nvmb2 d2m9wa1 d3dfxa\_ d2msya\_ d2djoa1  
d2r5za\_ d1au7a1 d1f43a\_ d2lmda1 d1akhb\_ d1s7ea1 d3nara\_ d1zq3p1  
d2craa1 d1mija\_ d4uuta\_ d3a01a\_ d1x58a1 d3rkqa1 d3cmya1 d2cqxa1  
d2da6a1 d1e3oc1 d1fjla\_ d1mh3a1 d1ig7a\_ d1x41a1 d1wh7a1 d1gt0c1  
d2mw8a\_ d1lfup\_ d1x2ma1 d1b72a\_ d1wi3a1 d1jgga\_ d1wjha1 d1x2na1  
d1mnmc\_ d2cuea1 d3k2aa\_ d2hosa\_ d2jwta2 d1pufa\_ d1oetcl d2hi3a\_  
d1b8ia\_ d4j19a\_ d3lnqa\_ d1wh5a1 d1fexa\_ d2cqra1 d1guua\_ d1ug2a1  
d2cqqa1 d2ajea1 d4a69c\_ d2crga1 d2iw5b1 d1xc5a1 d1ofcx1 d2cu7a1  
d1wgxa1 d2cjja1 d2ckxa1 d1gvda\_ d1hcra\_ d1tc3c\_ d1gdta1 d1u78a2  
d6paxa1 d6paxa2 d1k78a2 d1hlva1 d1iufa2 d1iufa1 d1bl0a1 d1bl0a2  
d1d5ya2 d3lv8a\_ d1s3ga1 d1zakal d1s4qa\_ d3tvta2 d1uf9a\_ d1khta\_

d1ckea\_ d1osna\_ d1p5zb\_ d3cm0a\_ d1tmka\_ d1jaga\_ d3h86a\_ d1t0hb\_  
d1nn5a\_ d2h92a\_ d3kb2a1 d2c95a1 d1yj5a2 d1kgda\_ d1ly1a\_ d2ak3a1  
d1vyva2 d1deka\_ d2grja1 d1p3ja1 d1y63a\_ d1e4ya1 d1s96a\_ d3iija1  
d1lvga\_ d1nksa\_ d1vyua2 d4e22a\_ d1qf9a\_ d1jjva\_ d1q3ta\_ d1ki9a\_  
d1lw7a2 d1teva\_ d1kjwa2 d1gsia\_ d2iyva2 d1kaga\_ d1e6ca\_ d1g3ma\_  
d1j99a\_ d1t8ta1 d1nsta\_ d1fmja\_ d1zrha\_ d2a3ra\_ d1aqua\_ d2zptx\_  
d3ckla\_ d1texa\_ d1q44a\_ d2gwaha\_ d1z0ja1 d3umra2 d3gj0a1 d2gaoa1  
d1yzga1 d1x3sa1 d1g7sa4 d1puja\_ d1ludxa2 d1kk1a3 d2o52a\_ d1jwyb\_  
d1zcaa2 d1zcba2 d2fv8a1 d2cjwa\_ d3dz8a1 d1xzpa2 d1vg8a\_ d4qxaa\_  
d2ew1a1 d1x1ra1 d2bcgy\_ d3doea1 d3cona\_ d3rega\_ d3wyga\_ d1upta\_  
d2b6ha1 d1zd9a1 d1lnza2 d1r5ba3 d1n0ua2 d1r2qa\_ d2f91a1 d2rhda\_  
d3q3jb\_ d3q85a\_ d1efma1 d1r8qa\_ d2gf9a1 d2akab1 d1ek0a\_ d1z08a1  
d2gcoa1 d2dy1a2 d4g01b\_ d2cxxa1 d1svia\_ d3q72a\_ d1ni3a1 d4ac9a4  
d2erxa1 d2bmea\_ d1wxqa1 d2gf0a1 d4ldja1 d1zunb3 d4lv5b\_ d1efca3  
d1kmqa\_ d2g6ba1 d3lrpa\_ d1tada2 d2y8ea\_ d4rd4a1 d1z06a1 d2heia\_  
d3a58b\_ d1u01a2 d1d2ea3 d1zj6a1 d2ocba\_ d3rwoa\_ d1mr3f\_ d2e9sa1  
d4u5xa1 d2iwra\_ d2fn4a1 d3bwdd\_ d2nzja1 d2atva1 d2ksqa\_ d3l43a\_  
d1mkya2 d1mkya1 d1wmsa\_ d1jnja3 d2rmka\_ d1f6ba\_ d1f60a3 d1gota2  
d1jala1 d2fh5b1 d1g16a\_ d2wblc\_ d1m7ba\_ d1wf3a1 d1f5na2 d1t9ha2  
d1z6xa1 d1z0aa1 d2fg5a1 d2a5ja1 d2bcjq2 d1s0ua3 d1ky3a\_ d4y0va\_  
d4lhwa\_ d2qmea1 d2atxa1 d1legaa1 d1ryha\_ d1moza\_ d1nrjb\_ d2erya1  
d3bfka\_ d1puia\_ d1fzqa\_ d3j3az1 d3t5ga\_ d1shza2 d3defa\_ d2f7sa1  
d3raba\_ d3tsoa\_ d3aq4a\_ d2a17a1 d3sfva1 d3bc1a\_ d2ncda\_ d1sdma\_  
d3h4sa1 d2heha\_ d2grya\_ g3kin.1 d1kk8a2 d1br2a2 d1goja\_ d1f9va\_  
d2mysa2 d3t0qa\_ d4db1a1 d3gbja\_ d1ry6a\_ d1v8ka\_ d1k8ka2 d1k8ka1  
d3uleb1 d3i33a2 d3i33a1 d1bupa1 d1dkgd2 d1dkgd1 d4ci6a2 d1jcfa1  
d4a2ba2 d2fxua1 d1yaga2 d1yaga1 d4cbua2 d1bupa2 d1g99a1 d2e1za2  
d2e1za1 d1saza1 d1saza2 d1liqca2 d1liqca1 d1eb7a2 d1eb7a1 d1nmla2  
d3h1jd1 d1hroa\_ d4gedb\_ d3zooa\_ d1mz4a\_ d1gu2a\_ d1f1fa\_ d1dvva\_  
d1c6ra\_ d1c75a\_ d1e29a\_ d1gdva\_ d1cnoa\_ d1h32b\_ d1co6a\_ d2bh4x\_  
d2aiua\_ d5cytr\_ d1jdl\_ d1i8oa\_ d2zboa\_ d3dmia\_ d1ls9a\_ d1wvec\_  
d2yk3a\_ d3ph2b\_ d1dw0a\_ d5aura\_ d1q13a\_ d1qn2a\_ d1f1ca\_ d2nqya\_  
d1h4ga\_ d1hixa\_ d1oa2a\_ d1olra\_ d3b7ma\_ d4h7ma1 d3wp3a\_ d2vgda\_  
d1igoa\_ d3zsea\_ d3wx5a\_ d1oa3a\_ d1pvxa\_ d1m4wa\_ d1f5ja\_ d1oa4a\_  
d1ks5a\_ d4ix1a1 d3i2ka1 d1lnsa3 d1mpxa2 d1etea\_ d3tgxb\_ d2z3qa1  
d3qb1a\_ d1hula\_ d1m48a\_ d4nkqb\_ d1eera\_ d1v7mv\_ d5e4ea\_ d2o27a\_  
d3b5ka\_ d2psma1 d4zf7a\_ d3uf5a\_ d4x51a\_ d1d9ca\_ d4ypgc1 d3oq3a\_  
d1lqsl\_ d1n1fa\_ d1au1a\_ d1wu3i\_ d3bes1\_ d3ux9a\_ d2ejca\_ d3muea1  
d1ihoa\_ d3q12a1 d4dnxa2 d1m8pa2 d1g8fa2 d1jhda2 d1x6va2 d2b71a\_  
d3rbaa\_ d2qtra\_ d1nupa\_ d3l92a\_ d1f9aa\_ d1qjca\_ d2h29a\_ d1vlha\_  
d1od6a\_ d1lw7a1 d1mrza2 d4ruka\_ d2e17a\_ d1liq0a2 d1irxa2 d1r6ta2  
d1ivsa4 d2cyba\_ d1rqga2 d1j09a2 d2yxna\_ d1f7ua2 d1h3fa1 d1ffya3  
d2g36a1 d1jila\_ d1n31a\_ d1i61a\_ d1pfva2 d1h3na3 d3n9ia\_ d3sz3a1  
d3sw2a\_ d1moxc\_ d1dx5i3 d1edmb\_ d1aut12 d1aut11 d1nqlb\_ d1dva11



d1szba2 d1kigl\_ d2y5fl\_ d1lijqa2 d1gk5a\_ d1g1sa2 d1nt0a3 d1xdtr\_  
d1lmja2 d1lmja1 d1nzia2 d2wphe\_ d1klil\_ d1pfxl2 d1pfxl1 d1p9ja\_  
d1g1ta2 d1f7ea\_ d4yzub\_ d2mgpa1 d1b9wa1 d1b9wa2 d2mgpa2 d1ob1c1  
d1n1ia2 d1n1ia1 d2npra2 d2npra1 d1m1xb4 d1pvaa\_ d3fs7a\_ d1ttxa\_  
d1rwya\_ d2kyfa\_ d1rk9a\_ d1a75a\_ d1lexra\_ d1tiza1 d1nyaa\_ d1g8ia\_  
d1wdcc\_ d3fwba\_ d1ggza\_ d2o5ga\_ d1ctaa\_ d1m45a\_ d3i5gc\_ d1sl8a\_  
d1fpwa\_ d2scpa\_ d2roaa\_ d4aqra\_ d3pn7b\_ d1br1b\_ d2mysb\_ d1s6ca\_  
d1bjfa\_ d2obha\_ d1jfk\_ d1jfk0a\_ d1qv0a\_ d1lkja\_ d2mlfc\_ d2m97a\_  
d2d8na\_ d4by5a\_ d1jbaa\_ d4nqga\_ d1wdcb\_ d2mysc\_ d1j7qa\_ d1s6ia\_  
d1uhka2 d1r2ua\_ d1dtla\_ d3kf9a\_ d3pn7c\_ d5d67d\_ d1tuza\_ d1h8ba\_  
d1eg3a1 d1eg3a2 d2zkmx1 d1snla\_ d1gjya\_ d1y1xa\_ d1hqva\_ d1dvia\_  
d1df0a1 d1qxp2 d4usla\_ d1k94a\_ d1wkya2 d1uuqa\_ d3wh9a\_ d4mlra\_  
d1xyza\_ d4xuya\_ d2je8a5 d4bf7a1 d3cuia\_ d1ur4a\_ d1qw9a2 d1lodza\_  
d2vzsa5 d1bqca\_ d2x2ya1 d1hjqa\_ d1qnra\_ d4y7ea1 d1vjza\_ d4k68a\_  
d2v3ga\_ d4hpga\_ d1nofa2 d1nq6a\_ d1h4pa\_ d1aq0a\_ d3ziza\_ d4bs0a\_  
d1ecea\_ d1h1na\_ d1ta3b\_ d1w91a2 d1ilwa\_ d1uhva2 d1us3a2 d1legza\_  
d7a3ha\_ d1tvna1 d3nyda1 d1ghsa\_ d2cyga1 d4xv0a\_ d2c8na2 d1w32a\_  
d3emca\_ d1v6ya1 d1foba\_ d2uwfa1 d2fgla\_ d3niya1 d2c0ha1 d1rh9a1  
d1yq2a5 d1szna2 d1fa2a\_ d1pama4 d5do8a1 d1ea9c3 d1hx0a2 d2fhfa5  
d1qhoa4 d1avaa2 d1m53a2 d4m8ua1 d2gjpa2 d1lwha2 d4howa1 d1ktba2  
d1j0ha3 d3vm5a1 d2x1ia\_ d1wzaa2 d1uasa2 d2diea1 d1mxga2 d1ht6a2  
d1eswa\_ d1iv8a2 d5cpsa\_ d1ud2a2 d1zjaa1 d3gbea1 d1kwga2 d1wdpa\_  
d1gcya2 d1g5aa2 d1hvxa2 d3dhpa2 d2bhua3 d4do4a1 d3qgva1 d1e43a2  
d1g94a2 d2d3na2 d1gjwa2 d1gvia3 d1x1na1 d1r7aa2 d1tz7a1 d2x42a1  
d1tr9a1 d3abza1 d4toqa\_ d1wb0a1 d1w9pa1 d1eoka\_ d1itxa1 d1kfwa1  
d1goia2 d1edqa2 d2gsja\_ d1hjxa1 d1jnda1 d1vf8a1 d1etob\_ d1umqa\_  
d1g2ha\_ d2w0pa\_ d2diaa1 d2e9ia2 d2e9ja1 d2dj4a1 d2eeba1 d2diba1  
d2dmba1 d2dmca1 d2d7oa1 d2ee6a1 d2d7pa1 d2eeaa1 d2di8a1 d1wlha1  
d2d7na1 d2nqca\_ d2d7ma1 d2dica1 d3cnka\_ d2k3ta1 d2eeca1 d1qfha2  
d2bp3a1 d1v05a\_ d2ee9a1 d2eeda1 d2di9a1 d3syxa1 d1mkea1 d2p8va\_  
d1xoda1 d1i7aa\_ d1evha\_ d1qc6a\_ d2v76a\_ d1wj1a1 d1aqca\_ d1qqga2  
d1qqga1 d1n3ha\_ d4dbba\_ d3f0wa1 d1p3ra\_ d1wgua1 d2cy4a1 d3hqca\_  
d1wvha1 d1xr0b1 d1wgqa1 d1v89a1 d2coda1 d1zc3b\_ d1wg7a1 d1u5ea1  
d1v61a1 d2coca1 d2ys1a1 d1v5pa1 d1nty2a1 d1wjma1 d1wila1 d1u29a\_  
d1xx0a1 d1unqa\_ d2zkmx3 d1fhoa\_ d1v88a1 d2adza1 d1x1fa1 d1p6sa\_  
d2coaa1 d1btka\_ d1v5ma1 d1faoa\_ d2x18a\_ d1dyna\_ d1x1ga1 d4kaxb\_  
d2j59m1 d1ki1b2 d1xcga2 d1txda2 d1u5da1 d1dbha2 d1wlha\_ d1upqa\_  
d1v5ua1 d1foea2 d2fjla1 d1eaza\_ d2dfka2 d2cofa1 d1kz7a2 d9ldta1  
d2ewda3 d1up7a1 d2dfda1 d1s6ya1 d1vjta1 d7mdha1 d1hyea1 d1t2da1  
d1ojsa3 d1b8pa1 d1ldna1 d1hyha1 d1civa1 d2a92a1 d1ez4a1 d1i0za1  
d1y6ja1 d1gv0a1 d1l1da1 d1lobba1 d3t4ea2 d1a4ia1 d1o0sa1 d2hk9a2  
d2egga2 d1b26a1 d1bvua1 d1gq2a1 d1c1da1 d1leha1 d1gtma1 d1euza1  
d1nvt1a1 d3dona2 d1ledza1 d1gpja2 d1vi2a1 d1p77a1 d1nyta1 d1b0aa1  
d1vl6a1 d1v91a1 d3wdpp1 d3wq5a\_ d1gnxa\_ d4gxpa\_ d4hz8a\_ d1e4mm\_

d3aiua\_ d1wcga1 d1qvba\_ d3ahxa\_ d1v02a\_ d2dgaa\_ d1pbga\_ d1vffa1  
d1qoxa\_ d4ha4a\_ d1kola2 d1f8fa2 d1qora2 d1jqba2 d1vj0a2 d1cdoa2  
d1gu7a2 d1d1ta2 d1xa0a2 d2dm6a2 d1jvba2 d1rjwa2 d1llua2 d1h2ba2  
d1tt7a2 d1piwa2 d1o89a2 d1liz0a2 d1e3ja2 d1yb5a2 d1uufa2 d1e3ia2  
d3gpdg1 d1vc2a1 d2nvwa1 d1u8fo1 d1ydwa1 d1hdgo1 d2g17a1 d1cf2o1  
d2czca2 d1r0ka2 d1obfo1 d2cvoa1 d1ebfa1 d1h6da1 d1i32a1 d1zh8a1  
d2q49a1 d1qkia1 d1j5pa4 d3pzra1 d1xeea1 d1vkoa1 d1vm6a3 d3qvsal  
d2pkqo1 d1b7go1 d1gr0a1 d1p1ja1 d1lc0a1 d1j0xo1 d3pwka1 d2hjsa1  
d1zyao1 d1vkna1 d1t1ta1 d1nvmb1 d3sjua\_ d3ojfa1 d1xu9a1 d2jjya1  
d1n7ha\_ d1y1pa1 d1h5qa\_ d1jtva\_ d4fs3a\_ d2bkaa1 d1gy8a\_ d2c5aa1  
d1ulsa\_ d1ooea\_ d2b69a1 d1y5ma1 d1spxa\_ d1ae1a\_ d1bxka\_ d1ydea1  
d1gega\_ d1hdoa\_ d1o5ia\_ d1e6ua\_ d1snya1 d2rhca\_ d3zv4a\_ d5ceja\_  
d2d1ya1 d1fjha\_ d3w8ea\_ d2fmua1 d1x1ta\_ d1rpna\_ d3ay7a1 d1k2wa\_  
d1eq2a\_ d2hrba1 d3ruaa\_ d2ew8a1 d4hwka\_ d1xgka\_ d2bd0a1 d1yo6a1  
d2a35a1 d2ntva\_ d1vl8a\_ d1hdca\_ d4bkua\_ d2ag5a1 d2q45a\_ d1nffa\_  
d4iy1a\_ d1zbqa1 d1kewa\_ d1ek6a\_ d1ja9a\_ d2q46a2 d1iy8a\_ d1cyda\_  
d2ptga\_ d1hxha\_ d1uzma1 d3ly1a\_ d4m89a\_ d3wyea\_ d2b11a1 d1w6ua\_  
d1sb8a\_ d2q2va\_ d4nr0a\_ d1e6wa\_ d2gasa\_ d3oiga1 d2bgka1 d1mxha\_  
d1vl0a1 d1rkxa\_ d1r6da\_ d1wmaa1 d1e7wa\_ d2c07a1 d1xkqa\_ d3tzha\_  
d1g0oa\_ d3lz6a\_ d1qyca\_ d1edoa\_ d1gz6a\_ d1oc2a\_ d1t2aa\_ d1zema1  
d2xoxa\_ d1z45a2 d1geea\_ d1p33a\_ d3lt0a\_ d4e6pa\_ d2wyua\_ d1db3a\_  
d4q9na\_ d1xh1a\_ d4o1ma\_ d1fmca\_ d2uvda\_ d2gdza1 d1uaya\_ d2z1ma\_  
d2o23a2 d2fr1a2 d2fr1a1 d1qsga\_ d1qyda\_ d4zjua\_ d2a4ka1 d1yb1a\_  
d1wvga1 d1yxma1 d3f4ba\_ d1mg5a\_ d1xg5a1 d1r55a1 d3gboa\_ d1at1a\_  
d1buda\_ d4q11a\_ d1quaa\_ d1yp1a\_ d1wnia\_ d3nqyb\_ d4gera\_ d1bqba\_  
d1g0da4 d2f4ma1 d1x3za\_ d3u1ra1 d1kapp2 d1k7ia2 d3ioqa\_ d1fh0a\_  
d1o0ea\_ d1khqa\_ d1m6da\_ d2cb5a\_ d1cs8a\_ g8pch.1 d1s4va\_ d2pnsa\_  
d1vsna1 d1mira\_ d1iwda\_ d2oula\_ d7pcka\_ d3bwka\_ d3bcna\_ d2p86a\_  
d1pvja\_ d1pcia\_ d1gece\_ d1deua\_ d4bs6a\_ d1xkga1 d1cqda\_ d1jqpa2  
d2c0ya\_ d2bdza\_ d3p5ua\_ d2o36a\_ d1k9xa\_ d1zoya1 d1d4ca2 d1chua2  
d1jnra2 d1kf6a2 d2jk6a2 d2jk6a1 d1feca1 d1feca2 d1lpfa1 d1lpfa2  
d1xhca1 d1xhca2 d1dx1a2 d1dx1a1 d1gera2 d1m6ia2 d1onfa1 d1onfa2  
d3lada2 d3lada1 d1w4xa1 d1w4xa2 d1gesa2 d1xdia1 d1fl2a2 d1fl2a1  
d1fcda1 d1fcda2 d1h6va2 d1h6va1 d1mo9a2 d1gv4a2 d1gv4a1 d2gv8a2  
d2gv8a1 d1aoga1 d1aoga2 d1hyua1 d1ebda1 d1ebda2 d3dk9a1 d1q1ra2  
d1q1ra1 d1gesa1 d1zbfal d2z1ha\_ d2etja1 d3qioa1 d1j11a\_ d2e41a\_  
d1j12a\_ d2lsna1 d1io2a\_ d1uaxa\_ d2yv0x\_ d1mu2a1 d1ekea\_ d1i39a\_  
d1pn0a1 d1reoal d1ju2a1 d2f5va1 d3c96a1 d2gmha1 d1pj5a2 d1gpeal  
d1o5wa1 d1n4wa1 d2dw4a2 d2ivda1 d1seza1 d2voua1 d1kdga1 d1s5ja1  
d2hbja2 d2igia\_ d1wlja\_ d1qhta1 d4dlea1 d1tgoa1 d2f96a1 d3tr8a1  
d3mxma\_ d1q8ia1 d1y97a1 d1w0ha\_ d1kfsa1 d2py5a1 d1noya\_ d1d5aa1  
d1yt3a3 d2guia\_ d3mwpa1 d4kb1a\_ g1apy.1 d3ljqa\_ g1k2x.1 d1liuka\_  
d2csua1 d3q9ub\_ d2yv1a1 d3q9na\_ d2d59a\_ d1oi7a1 d2yv2a1 d1leuca1  
d1y81a1 d2av4a1 d3nvva1 d1krha3 d2h88b1 d1n62a2 d1t3qa2 d1kf6b2

d1zoyb1 d1jq4a\_ d1dgja2 d1rm6c2 d1r7ha\_ d1faaa\_ d1wika1 d1xfla\_  
d1ttza1 d2f51a1 d1ti3a\_ d1nhoa\_ d1sena\_ d2i4aa\_ d1ep7a\_ d1zmaa1  
d1fo5a\_ d3lefa1 d3diea1 d2yana1 d1z6na1 d1oaza\_ d3zywa1 d4aj8a\_  
d1nm3a1 d4fiwa\_ d1wmja\_ d4hs1a1 d1liloa\_ d1xwaa1 d1wjka1 d2vm1a\_  
d1fb6a\_ d1gh2a\_ d1h75a\_ d1nw2a\_ d3us3a3 d3us3a1 d1pd212 d1nhya2  
d2a2ra2 d1k0dd2 d1f2ea2 d1gsua2 d1f3ba2 d2fhea2 d2pvqa1 d1tw9a2  
d1oyja2 d1e6ba2 d1k0ma2 d3ik7a1 d4is0a1 d1r5aa2 d1jlva2 d1m0ua2  
d3gtub2 d1z9ha2 d1okta2 d1axda2 d2gsra2 d1tu7a2 d1k3ya2 d1zgm1  
d1b48a2 d1gnwa2 d2gsta2 d1glqa2 d1oe8a2 d1pn9a2 d1v2aa2 d1fw1a2  
d1duga2 d1g7ea\_ d1a0rp\_ d1ig8a1 d1czan2 d1czan3 d1czan1 d1ig8a2  
d1czan4 d1bg3a4 d1bg3a3 d1bg3a1 d1qusa\_ d1txga2 d3f47a1 d1mv8a2  
d2pv7a2 d1xc2a3 d2ahra2 d4xiya1 d2f1ka2 d1pgja2 d1i36a2 d1np3a2  
d1lj8a4 d1teaa3 d1qmga2 d2i76a2 d2g5ca2 d1wdka3 d1dlja2 d3cuma3  
d1qqya\_ d1gd6a\_ d1f6ra\_ d1livma\_ d2gv0a\_ d1iiza\_ d2z2fa\_ d1j8xa\_  
d1gh1a\_ d1b9oa\_ d1691a\_ d2o4wa\_ d1p37a\_ d1k28a3 d1xjta1 d1jtma\_  
d2f2qa\_ d4e97a1 d1g4ma1 d1g4ma2 d3w3ea\_ d4tx7a\_ d3cq1a\_ d4msta\_  
d3iwra\_ d1dxja\_ d2z37a\_ d4dyga\_ d2pjsa1 d1klla\_ d2i7ra1 d1ecsa\_  
d1xqaa1 d5cj3a1 d1npba\_ d2p7oa\_ d1r9ca\_ d1nkia\_ d1mpya2 d1kw3b2  
d1kw3b1 d4ghga1 d1tfza1 d3isqa1 d3isqa2 d1sqia1 d1sqia2 d1lkda2  
d1lkda1 d1mpya1 d1cjxa2 d1sp9b2 d1t47a1 d1t47a2 d1flua2 d1sp8a1  
d1sp8a2 d1flua1 d1pv8a\_ d1w5qa\_ d2c1ha\_ d1l6sa\_ d1qsta\_ d2beia1  
d4m3sa\_ d1u6ma1 d1ygha\_ d1yk3a1 d3dr6a\_ d1xmta\_ d1z4ea1 d2ge3a1  
d1bo4a\_ d2f1aa1 d2jdca1 d1y9wa1 d3to7a\_ d1wwza1 d2fl4a1 d2ozua1  
d2b5ga\_ d2cy2a1 d2p0wa\_ d1cm0a\_ d4pswa\_ d1yrea1 d1yr0a1 d1m4ia\_  
d2gana1 d1yvka1 d1ghea\_ d2g3aa1 d1y7ra1 d2euia1 d1q2ya\_ d2fsra1  
d1xeba\_ d2ae6a1 d1qsm1a\_ d2aj6a1 d1y9ka1 d1i12a\_ d1vkca\_ d2atra1  
d1n71a\_ d2d4pa1 d2fiwa1 d2fe7a1 d1tiqa1 d2ou2a\_ d1yx0a1 d2fcka1  
d1p0ha\_ d2j8ma\_ d2pq8a\_ d1z4ra1 d1s3za1 d1ufha\_ d1dosa\_ d1gvfa\_  
d3qm3a1 d2fjka\_ d1xvqa1 d1pn0a2 d3hy2a\_ d2cvba1 d1o8xa\_ d1lu4a\_  
d1we0a1 d2bmxa1 d2a4va1 d1psqa\_ d1xiya1 d1q98a\_ d1n8ja\_ d1zofa1  
d2ggta\_ d3tjja\_ d4je1a1 d3s9fa\_ d2zcta\_ d1qmva\_ d1jfua\_ d2b1ka\_  
d5dvba1 d2b5xa1 d2v2ga\_ d1st9a\_ d3tb2a\_ d4llra\_ d4fh8a1 d1e2ya\_  
d1knga\_ d2h30a\_ d1i5ga\_ d2z9sa\_ d2f8aa1 d1tp9a1 d2b7ka\_ d1nm3a2  
d3hvva\_ d2wfca1 d4kcea\_ d1xvwa1 d4gqca1 d3qpma\_ d4k1fa\_ d1zsoa1  
d1gp1a\_ d1prxa\_ d1f74a\_ d3l21a\_ d2e1da\_ d1to3a1 d1w3ia\_ d1sfla\_  
d1n7ka\_ d1vcva1 d4imea\_ d1wa3a\_ d2ocza1 d1f2ja\_ d3m16a\_ d2yxga\_  
d1ub3a\_ d3a5fa\_ d1fbaa\_ d1l6wa\_ d1xfba1 d1wx0a1 d1vpxa1 d1mxsa\_  
d2a4aa1 d1xkya1 d3cq0a1 d3s1xa\_ d1f05a\_ d1fdja\_ d3cp1a1 d4d2ja\_  
d1cg2a1 d1yloa2 d1y7ea2 d1y0ya3 d1lfwa1 d1vixa1 d1fnoa4 d1vhoa2  
d1ysja1 d1vhea2 d1z21a1 d2fvga2 d1vgya1 d1r3na1 d2grea2 d1xmba1  
d1rtqa\_ d1etha2 d1w52x1 d2pp1a1 d1hpla2 d1lpbb2 d2oxea1 d1rp1a2  
d1ys1x\_ d4hs9a\_ d1ispa\_ d1ex9a\_ d1ku0a\_ d3qmma\_ d3rp2a\_ glucy.1  
d1fuja\_ d2zchp\_ d3w94a\_ d1si5h\_ d1lo6a\_ g2pka.1 d1cgha\_ d1kigh\_  
d1a5ia\_ d3s9ba\_ d1hj8a\_ d1ao5a\_ d2anya\_ d1q3xa1 d1gvza\_ dlazza\_

d4gsoa\_ d2f91a1 dliaua\_ dlgdna\_ dleufa\_ glfiw.1 dleq9a\_ d4nfea\_  
d2rdla\_ dlspja\_ dlelva1 d1a7sa\_ dlekbb\_ dlpxfc\_ dlyc0a\_ d2aiqa\_  
glfiz.1 d1fi8a\_ d4k60a\_ d4dgja\_ dlmzaa\_ d1op0a\_ d3tjva\_ d1pytd\_  
d1sgfg\_ glgg6.1 d2eeka\_ glrtf.1 d1a0ja\_ d3g01a\_ d1pytc\_ d4e7na\_  
d1ddja\_ d1z8ga1 d2hlca\_ d1npma\_ gljou.1 d1sgfa\_ d1autc\_ g2hnt.1  
glkdq.1 dlorfa\_ d3s69a\_ d4crga\_ dlfxya\_ d1bqya\_ d1lgya\_ d4l3wa\_  
d1llfa\_ dlgz7a\_ dlukca\_ d2hqya1 d2hqya2 d1lrza2 d1ne9a1 d1lrza3  
d3groa\_ d1pjaa\_ d1thta\_ d1ra6a\_ d1muka\_ d3gsza\_ d1khva\_ d1te9a\_  
d2xwha\_ d3uqsa\_ d3hkwa\_ d3n6ma\_ d2cjqa\_ d2xya\_ d1teba\_ d1te8a\_  
d1s48a\_ d1u09a1 d4wfxa\_ d3tyqa\_ d2pgga1 d3zxha\_ d1cgl\_ d1rm8a\_  
d1leaka2 d1hy7a\_ d2jsda\_ d1cxva\_ d1hv5a\_ d3p0ya1 d1lgra1 d1lgra2  
d1n8yc2 d1n8yc1 d1m6ba1 d1dzka\_ d4tlja\_ d2a2ua\_ d4wfv\_ d3tlda\_  
d4iaxa\_ d3zq3a\_ d2nnda\_ d1i4ua\_ d1kxoa\_ d1bbpa\_ d1kt7a\_ d1lexsa\_  
d3s26a1 d1lf7a\_ d1qfta\_ d4gh7a\_ d1z24a1 d1qabe\_ d1xkia\_ d1ew3a\_  
d3bx7a\_ d4iawa1 d1n0sa\_ d1gkab\_ d3kzaa\_ d2k23a\_ d2l9ca1 d2joza1  
d1gm6a\_ d3kffa\_ d3saoa1 d1e5pa\_ d1yupa1 d1iiua\_ d2tbvc\_ d1c8nc\_  
d1x36a\_ d1smvc\_ d1ng0c\_ d1lopa\_ d1f2nc\_ d1cixa\_ d1y29a\_ d1v7fa\_  
d2jtba\_ d1dlha\_ d1g9pa\_ d1lupa\_ d1qk7a\_ d1mb6a\_ d2a2va\_ d1niya\_  
d1i25a\_ d1hvwa\_ d2mpqa\_ d1ie6a\_ d1kqha\_ d1la4a\_ d2mxoa1 d1koza\_  
d1qk6a\_ d1emxa\_ d1lqra\_ d1c6wa\_ d1rmka\_ d1eyoa\_ d1cna\_ d1fu3a\_  
d1glpa\_ d1f3ka\_ d1fyga\_ d1rypd\_ d1lrua\_ d1rypc\_ d3unfk\_ d1rypa\_  
d1j2pa\_ d1lru\_ d1j2qh\_ d3unfh\_ d1m4ya\_ d1rypb\_ d1lru\_ d1lru\_  
d1lru2\_ d1q5rh\_ d1rypg\_ d1g3ka\_ d1lru\_ d1q5qa\_ d1e94a\_ d1lru\_  
d1ryph\_ d3ty6a\_ d1lru\_ d1lru\_ d1rype\_ d1lru\_ d1lru\_ d3mi01\_  
d1rypf\_ d1lru\_ d2z3ba\_ d1lru\_ d3mka2\_ d1lru\_ glgk9.1 glor0.1  
gle3a.1 d1mqta\_ d1d4m3\_ d1fmd3\_ d2mev1\_ glaym.1 d1ev13\_ d4q4w1\_  
d1r1a3\_ d2x5ia\_ d1rhi1\_ glr1a.1 gl1d4m.1 glrhi.1 d1b35b\_ d1lopa\_  
d1tme1\_ d4iv1a\_ glpvc.1 glfpn.1 d1fpn1\_ d4gb31\_ d1d4m1\_ d1fmd1\_  
d1ev11\_ d2wzr3\_ glcov.1 d1qqp3\_ glfmd.1 d2x5ic\_ d1rhi3\_ gloop.1  
d1hxs1\_ glhxs.1 d1fpn3\_ d1bev1\_ g2mev.1 d1eah3\_ d1aym1\_ d1pvc3\_  
d1qqp1\_ d1zba3\_ d1h8ta\_ d3vbhc\_ glb35.1 glbev.1 d1hxs3\_ gllev1.1  
d1bev3\_ gltmf.1 d1b35a\_ d2mev3\_ gl Leah.1 glh8t.1 d1eah1\_ d4q4w3\_  
d1r1a1\_ d1aym3\_ d1pvc1\_ d1zba1\_ d1h8tc\_ d1loopc\_ d1tme3\_ glqqp.1  
d4iv1c\_ gltme.1 d1y14b1 d2nn6i1 d1i941\_ d2zjra2 d1smxa\_ d2qamc2  
d1hh2p1 d2r7da1 d1r12a2 d1wfga1 d3bzka4 d1x6oa2 d3a0ja\_ d2j01d2  
d2ja9a1 d4q15a\_ d1hr0w\_ d1luza\_ d2n3sa\_ d2vnud1 d1h95a\_ d1go3e1  
d2nn6h1 d1ne3a\_ d2mola\_ d1iz6a2 d1jjga\_ d1e3pa2 d2ix0a3 d2ix0a2  
d2lxja\_ d1ueba3 d1ueba2 d2z0sa1 d1u0la1 d2ix0a1 d2eifa2 d2je6i1  
d3i2za1 d2c35b1 d2ahob2 d1t9ha1 d3i4oa\_ d2qall1 d1jt8a\_ d2nn6g1  
d1g6pa\_ d3cama\_ d1i94q\_ d1c9oa\_ d1d7qa\_ d2ba0a1 d2vnud2 d2vnud3  
d1khia2 d2qalq1 d1wi5a1 d1xta2 d1ny4a\_ d4w9ta\_ d4x2ra1 d1ka9f\_  
d1qo2a\_ d4axka1 d1thfd\_ d1h5ya\_ d4u28a\_ d2y88a\_ d4wd0a\_ d1vzwa1  
d1ux8a\_ d1dlya\_ d4i0va\_ d2bkma\_ d2bmma\_ d2r80b\_ d1cqa1 d1cg5a\_  
d1gcvb\_ d3boma\_ d2h8fb\_ d2raoa\_ d3bj1a\_ d4hrrb\_ d2r50a\_ d3d1kb\_

d2aa1b1 d3zhwa\_ d3hf4b\_ d3gdja\_ d1jebb\_ d3bj1b\_ d1x9fb\_ d1wmub\_  
d1gcva\_ d3bcqb\_ d3d4xb\_ d1gvha1 d2dc3a\_ d3hf4a\_ d4yu3a\_ d3k8ba\_  
d1qpwb\_ d2r80a\_ d3bcqa\_ d1v4wa\_ d3wtgb\_ d1j17a\_ d4esaa\_ d1a9we\_  
d3d1ab\_ d1fsla\_ d4h21a\_ d1v4wb\_ d1mwca\_ d1vhba\_ d1jeba\_ d1spgb\_  
d1h97a\_ d1q1fa\_ d1tu9a1 d3d1aa\_ d1hdsb\_ d3hyub\_ d2zfb\_ d3fs4a\_  
d1oj6a\_ d1shrb\_ d4h21b\_ d4yu3b\_ d1spga\_ d3hrwa\_ d3qqra\_ d3at5a\_  
d4wchd\_ d3hyua\_ d1cg5b\_ d1uc3a\_ d1hbra\_ d2raob\_ d1outb\_ d4esab\_  
d3gdjb\_ d3qqqa\_ d1x9fc\_ d3vrfa\_ d1litha\_ d3mkba\_ d3d4xa\_ d3mjpa\_  
d1j16a\_ d3fh9a\_ d1outa\_ d2dc3b\_ d1lit2a\_ d3eoka\_ d3g46a\_ d1qpwa\_  
d3vrfb\_ d1ch4a\_ d1x9fd\_ d1hdsa\_ d2zfb\_ d3mkbb\_ d1or4a\_ d3wtga\_  
d1a4fa\_ d3fh9b\_ d3bomb\_ d3cy5a\_ d3at5b\_ d1x9fa\_ d2oifa\_ d4lmbx\_  
d1cpcb\_ d3v57a\_ d1kn1a\_ d1cpca\_ d4f0ta\_ d2vjha\_ d4po5b\_ d1eyxa\_  
d1alla\_ d4f0tb\_ d1b33b\_ d1b8db\_ d4h0mb\_ d1b33a\_ d2vjhb\_ d4lmb6\_  
d2vmlb\_ d1allb\_ d2vjta\_ d3dbja\_ d2vmla\_ d2vjtb\_ d4f0ub\_ d1f99b\_  
d4rmpa1 d1liaa\_ d1eyxb\_ d2uulb\_ d4lmsb\_ d4f0ua\_ d2bv8a\_ d1f99a\_  
d2bv8b\_ d2c71b\_ d3dbjb\_ d4rmpb1 d1b8da\_ d4h0ma\_ d3v57b\_ d1kn1b\_  
d2uula\_ d2j96a\_ g1gxs.1 d1azwa\_ d2xqfa\_ d1ea5a\_ d1f6wa\_ d1dx4a\_  
d1qe3a\_ d1k4ya\_ d4qwwa\_ d2ha2a\_ d1sfra\_ d1f0na\_ d4qeka\_ d3c8da2  
d2pbla1 d1jkma\_ d1jjia\_ d1jjfa\_ d1jmx4 d1pbya3 d1pbya4 d1b9ra\_  
d1offa\_ d1frra\_ d3wcqa\_ d1e9ma\_ d1l5pa\_ d1wria\_ d1i7ha\_ d3av8a\_  
d1czpa\_ d1rfka\_ d3p1ma1 d3b2ga\_ d2bt6a2 d4iuaa3 d4bvva\_ d5hpga\_  
d3k65a\_ d1ki0a3 d1ki0a2 d1ki0a1 d1a0ha1 d3sp8a3 d2feba1 d1mdwa\_  
d1ziva1 d1zema1 d2m5ta\_ d1cqqa\_ d1wqsa\_ d5bpea\_ d2ipha\_ d1lvoa\_  
d2bhga1 d3tnta\_ d3sjia\_ d3d23a1 d2fyqa\_ d3tloa\_ d3zvea1 d2hrva\_  
d3q3ya1 d4asha1 d1e88a1 d1l6ja5 d1l6ja4 d1eaka4 d1eaka3 d1l6ja3  
d1h8pa2 d1h8pa1 d2ftba\_ d1pmpa\_ d2rcqa1 d1fdqa\_ d4lkpa\_ d1sa8a\_  
d1vyfa\_ d1lpja\_ d3vg7a1 d4azqa1 d1o8va\_ d5bvqa\_ d1p6pa\_ d2qo4a\_  
d1opba\_ d1yiva1 d1o1va\_ d4bvma1 d4tkba\_ d4i3ba\_ d1bwya\_ d1ftpa\_  
d4gkca\_ d1cbia\_ d3p6da1 d1kqwa\_ d2a0aa1 d3gv5b1 d1t94a2 d3bq0a2  
d3lgia\_ d3i77a\_ d2z9ia2 d4nsva\_ d1lcya2 d4jcna\_ d1agja\_ d1os8a\_  
d1hpga\_ d1p3ca\_ d1l1ja\_ d1qtfa\_ d1e69a\_ d1mv5a\_ d3g60a4 d1ewqa2  
d1ji0a\_ d1qhla\_ d1v43a3 d2wmfa1 d1vpla\_ d1g2912 d4a82a2 g1f2t.1  
d2d62a1 d3tuic1 d2bbsa1 d3g60a3 d2ixea\_ d1g6ha\_ d1sgwa1 d2qi9c\_  
d3r1fa1 d3b60a1 d3d31a2 d2pzea1 g1xew.1 d1jj7a\_ d1oxxk2 d2onka1  
d1w1wa\_ d1iwea\_ d1qf5a\_ d1vmaa2 d1nija1 d1np6a\_ d2p67a1 d3ihla\_  
d1okkd2 d1l1sa2 d1s1ma2 d1liona\_ d2v40a\_ d3hida\_ d2vola1 d2g0ta1  
d1vcoa2 d1j8mf2 d1g3qa\_ d1xjca\_ d1p9ba\_ d1qzxa3 d1ihua2 d1ihua1  
d2qm8a\_ d1dj2a\_ d4ioja\_ d1cp2a\_ d1yrba2 d1hyqa\_ d3gqba2 d1skye3  
d1xp8a1 d1tf7a2 d1tf7a1 d1ye8a1 d1skyb3 d2qe7d2 d4blta\_ d4huta\_  
d3l1daa2 d4hyya\_ d2i3ba1 d1cr1a\_ d3j9tb2 d3ntua2 d1vdza1 d2z43a\_  
d1e9ra\_ d1nlfa\_ d3ziaa2 d1n0wa\_ d1g6oa\_ d3ziad2 d3j9ta2 d1pzna2  
d3gqbb2 d2i49a\_ d1nnfa\_ d1xvxa\_ d1lursa\_ d1h3da1 d1iuda\_ d4mlva1  
d1twya\_ d3e13x\_ d2nxoa1 d4pfua\_ d3ttma\_ d1elja\_ d2qmw1 d1us5a\_  
d1y3na1 d1jeta\_ d1uqwa\_ d4f19a1 d2esna2 d3thia\_ d3fasa1 d2uyeb\_

d2xwva1 d1r9la\_ d2fyia1 d1pb7a\_ d2ozza1 d1sw5a\_ d1nh8a1 d1vr5a1  
d2g29a\_ d1xs5a\_ d3lswa\_ d2z23a\_ d3w9va\_ d3tcha\_ d1q35a\_ d1z7me1  
d3q27a\_ d1p99a\_ d1ve4a1 d2i6ea1 d4mcoa1 d4n8ya\_ d1eu8a\_ d1zbma1  
d1hsla\_ d1lixca2 d1j1na\_ d1xvya\_ d1y9ua\_ d2z22a1 d1xoca1 d4oera\_  
d1wdna\_ d5f1qa1 d1xt8a1 d1i6aa\_ d4gwoa\_ d4igta1 d1pc3a\_ d4mmpa1  
d1o63a\_ d2cz1a1 d2onsa2 d4mija1 d4ok5a1 d2bmfa1 d2bmfa2 d1yksa1  
d1yksa2 d2qeqa1 d2j1qa1 d1a1va2 d1eh3a\_ d3skpa\_ d1dtza1 d1dtza2  
d1ieja\_ d1jnfa2 d1ce2a1 d1jnfa1 d1b1xa2 d1b1xa1 d1jw1a1 d1jw1a2  
d1ryoa\_ d1h76a1 d1h76a2 d1c4oa1 d2p6ra3 d2p6ra4 d1oywa2 d1oywa3  
d1wrba1 d1w36b2 d1w36b1 d1c4oa2 d3bora\_ d1t6na\_ d2eyqa5 d2eyqa3  
d2eyqa2 d2zu6a2 d1veca\_ d1uaaa1 d1w36d1 d2g9na1 d1z3ix2 d2rb4a\_  
d1hv8a1 d1hv8a2 d1t5ia\_ d1w36c2 d2j0sa2 d2j0sa1 d1fuka\_ d3hjha1  
d1z5za1 d1qdea\_ d1z63a1 d1s2ma2 d1s2ma1 d1wp9a1 d1wp9a2 d1gm5a3  
d1gm5a4 d3dina4 d3dina3 d1q0ua\_ d1w36c1 d1z3ix1 d1nкта3 d1uaaa2  
d1w36d2 g1qhh.1 d2fwra2 d2fwra1 d3q3ma\_ d1za0a1 d1mxra\_ d2inca\_  
d1jk0a\_ d2incb\_ d1mhyb\_ d3hf1b\_ d1mtyb\_ d1r2fa\_ d2uw1a\_ d1mhyd\_  
d3n37a\_ d1afra\_ d1syya\_ d1mtyd\_ d2o1za\_ d1uzra\_ d1smsa\_ d2fkza\_  
d1zujal d1s3qa1 d2fjca1 d1z6om1 d1veia\_ d4dyya\_ d1jiga\_ d3gvya\_  
d2pyba\_ d4cy9a1 d3bvfa1 d1r03a\_ d2cf7a\_ d1nf4a\_ d1zs3a1 d4iwka\_  
d3ka8a\_ d3np0x\_ d1n1qa\_ d1lb3a\_ d4e6ka\_ d1z6oa1 d2fzfa1 d4dyua\_  
d3ge4a\_ d1jgca\_ d4am4a\_ d2z6ma\_ d1ji5a\_ d1vlga\_ d1lkoal d1krqa\_  
d3qz3a\_ d1o9ra\_ d2ffxj\_ d1euma\_ d1yv1a1 d2v2pa\_ d1j30a\_ d4di0a\_  
d1dpsa\_ d2cbia2 d2choa2 d1l8na1 d1oewa\_ d2qzxa\_ d2asia\_ d1psoe\_  
d1smra\_ d2h6ta\_ d1pfza\_ d1lizda\_ d3hd8a\_ d1j71a\_ d1dpja\_ d4aa9a\_  
d1t6ex\_ g1b5f.1 g1lya.1 g1htr.1 d1qdma2 d1bxoa\_ d1wkra\_ d1tzsa\_  
d1libqa\_ d2qzwa\_ d1ex4a2 d1c6va\_ d1bdqa\_ d3ggta\_ d3ixoa\_ d1mrxal\_  
d2haha\_ d1tw7a\_ d4njsa\_ d1sgua\_ d2p3da\_ d1nsoa\_ d3d3ta\_ d2rkfa\_  
d1c6ya\_ d3ogpa\_ d3ekwa\_ d2o4na\_ d2j9ja\_ d1baia\_ d3ggua\_ d3lzua\_  
d4npua\_ d4j55a\_ d2r8na\_ d2fxda\_ d2p3ca\_ d4dqa\_ d3ttpa\_ d3t3ca\_  
d2p3aa\_ d2hc0a\_ d2fdda\_ d3mwsa\_ d1k8rb\_ d1wgra1 d1ef5a\_ d1wfyal  
d1e8ya3 d1wgya1 d2cs4a1 d1wxma1 d2byeal d3kh0a1 d2byfal d1wxaa1  
d1e7ua3 d1wgda1 d1wggal d4q5eb\_ d1wjnal d1se9a\_ d3n3kb\_ d1wz0a1  
d1we6a1 d2m0xa\_ d2gbka\_ d3rt3b1 d1wh3a1 d1sifa\_ d2ekec2 d4ii2b1  
d4hk2a1 d1c3ta\_ d1m94a\_ d1wgla1 d1ttna1 d1j8ca\_ d1wx8a1 d3v6cb1  
d2ma9b\_ d4i6lb1 d1bt0a\_ d2jvca1 d1iyfa\_ d2k1fa\_ d1wxva1 d1wf9a1  
d1t0ya\_ d2io0b2 d1x1ma1 d2gbma\_ d1zw7a1 d2m17a\_ d1ud7a\_ d1we7a1  
d2lwpa\_ d2gbja\_ d1wjua1 d1v6ea1 d1v86a1 d4eewa\_ d1wiaa1 d4icva\_  
d4gu2a\_ d1wx7a1 d1wy8a1 d4hjka1 d2faza1 d1v5oa1 d2a13a1 d2cr5a1  
d1wj4a1 d3h33a\_ d1rwja\_ d19hca\_ d1os6a\_ d3bxua\_ d3h4na\_ d1i77a\_  
d3caoa\_ d1j0pa\_ d2ctha\_ d1duwa\_ d1ofwa\_ d2e84a\_ d1hh5a\_ d1gyoa\_  
d3h34a\_ d2bcgg1 d2bcgg2 d1d5ta1 d1wioa4 d1ccza2 d1vcaa1 d1dr9a2  
d1ic1a1 d2d9qb1 d2nxyb2 d1um8a\_ d1lixza\_ d1qvra2 d1qvra3 d1qzma\_  
d1sxjc2 d1jr3d2 d2p65a\_ d1g8pa\_ d3hu3a3 d1sxjd2 d1njfa\_ d1in4a2  
d1sxja2 d1tuea1 d2ce7a2 d1w5sa2 d1sxjb2 d1d2na\_ d1ny5a2 d1ofha\_

d2gnoa2 d2a5yb3 d1fnna2 d1u0ja1 d1lv7a\_ d1iqpa2 d2fnaa2 d1ixsb2  
d4gita\_ d1sxje2 d1g41a\_ d2k4ua\_ d1hp2a\_ d2lu9a\_ d1baha\_ d2meoa1  
d1wm7a\_ d1hlya\_ d1n8ma\_ d1jlza\_ d1wpda\_ d1c55a\_ d1pvza\_ d1wt7a\_  
d1rjia\_ d1wz5a\_ d1m2sa\_ d1pjva\_ d1c49a\_ d1qkya\_ d2ktca1 d1wmta\_  
d1du9a\_ d1j5ja\_ d1r1ga\_ d1t0za\_ d2i61a\_ d1t1ta\_ d1sn4a\_ d1kv0a\_  
d21kba\_ d1npia\_ d1wwna\_ d1pe4a\_ d2kbka\_ d2li7a\_ d1djta\_ d2kbha\_  
d1dq7a\_ d1sega\_ d1omya\_ d1zywa1 d1jzaa\_ d1bbua1 d1e1oa1 d1c0aa1  
d1b8aa1 d1l0wa1 d3a74a1 d1eova1 d1t61c1 d1iyjb4 d1iyjb5 d1iyjb3  
d1o7ia\_ d4ipca1 d1x3ea\_ d4apva\_ d1jb7a1 d1jb7a2 d1jb7a3 d3kdfa\_  
d1ue1b\_ d1wjja1 d3eiva\_ d1xjva2 d1xjva1 d2ccza2 d1se8a\_ d1l1oc\_  
d1jb7b\_ d3ulla\_ d1qzga\_ d1miua4 d1miua5 d1miua3 d3g48a1 d1gd7a\_  
d1mkha\_ d1pyba\_ d3ubub\_ d1legia\_ d1qo3c\_ d1v7pa\_ d1tdqb\_ d3ubua\_  
d1c3ab\_ d1h8ua\_ d3bx4b\_ d1t8ca1 d1sb2a1 d1qdda\_ d2ziba1 d3cada\_  
d1byfa\_ d1j34b\_ d1jwia\_ d1jzna\_ d1oz7b\_ d1wmza\_ d3bdwb\_ d1hq8a\_  
d1fifa1 d1dv8a\_ d3hupa\_ d1wk1a1 d1umra\_ d2afpa\_ d3bx4a\_ d1gz2a\_  
d1sl6a\_ d1v7pb\_ d3g8ka\_ d1ixxa\_ d1j34a\_ d1jwib\_ d1g1sa1 d1y17a1  
d1ja3a\_ d1fvub\_ d3bdwa\_ d1sb2b1 d1fvua\_ d1umrc\_ d1oz7a\_ d4m17a\_  
d3cfwa1 d1ypqa1 d1g1ta1 d3fd4a\_ d3l9jc\_ d4dn8a1 d1v41b\_ d1rd1l\_  
d2msba\_ d1dgsa2 d1fvia1 d1ckma1 d1p16a1 d1x9na2 d1rpma\_ d2shpa1  
d1yfoa\_ d1l8ka\_ d2ooqa1 d1g4us2 d1p15a\_ d1lara2 d1lara1 d1wcha\_  
d2fh7a2 d2fh7a1 d1ohea2 d2f4da\_ d1rxda\_ d2hxpa\_ d1xria\_ d1d5ra2  
d1fpza\_ d3ezza\_ d4y2ea\_ d1i9sa\_ d3azya\_ d3wvja\_ d1upsa1 d1ajoa\_  
d2hyka\_ d2vy0a\_ d1o4ya\_ d3o5sa\_ d3d6ea\_ d3atga\_ d1dypa\_ d1umza\_  
d3i4ia\_ d1c1la\_ d41bqa\_ d1a78a\_ d1slta\_ d4no4a\_ d3zsja\_ d3duia\_  
d1g86a\_ d1is3a\_ d1qmja\_ d1hlca\_ d1tdha3 d1q3ba3 d1ee8a3 d1k82a3  
g1qmo.1 g1len.1 d3zyra\_ d1fnya\_ d1n47a\_ g2ltn.1 d1avba\_ d3usua\_  
d1dhkb\_ d1f9ka\_ d1ukga\_ d1g8wa\_ d1g9fa\_ d1wbfa\_ d3wcsa\_ g1loe.1  
d1mvqa\_ d1hq1a\_ d1v6ia\_ d1dbna\_ d1qnwa\_ d1fx5a\_ d4l8qa\_ d1ioaa\_  
d3n35a\_ d3ubra\_ d1qo8a1 d1d4ca1 d2k3va\_ d1ft5a\_ d1qdba\_ d1mlqa\_  
d2j7aa\_ d1h21a\_ d1ogyb\_ d4fasa\_ d1jnia\_ d1oaha\_ d1sp3a\_ d2h0ba\_  
d2erfa\_ d1h30a2 d3mw4a1 d1pz7a\_ d2r1ba\_ d3v64a1 d1d2sa\_ d3bopa1  
d3mw3a1 d1okqa1 d1okqa2 d1dszb\_ d1a6ya\_ d3cbba\_ d1ynwa1 d1r4ia\_  
d1hcqa\_ d2hana\_ d2hanb\_ d2enva1 d1kb4b\_ d2n11b\_ d1cita\_ d1adqa1  
d1fnga1 d1uvqb1 d1zs8a1 d2vola1 d2vola2 d1mfb12 d2jelh2 d1uwel2  
d3qq4b1 d1kjvb\_ d1k5na1 d1osph2 d4odhl2 d1ow0a1 d1ow0a2 d1bfob2  
d3l9ra2 d3jtth1 d2fath2 d4elkb2 d1fn4b2 d2xfxb\_ d1pg7x2 d1cqka\_  
d4k71b2 d1lk2a1 d1eapb2 d4lfhg2 d1i4fa1 d2nw2a2 d1kfah2 d1mhca1  
d1h3ua1 d1wejh2 d1h0db2 d1a5fh2 d1kcvh2 d1mjuh2 d1qqda1 d1kcrh2  
d1k8ia1 d3huja2 d2nnab1 d1nfd2 d3mffb2 d1s9va1 d1lk3h2 d1q0x12  
d1fv1b1 d1neza1 d4rfeb2 d1r3ha1 d1a6tb2 d1kjva1 d1pz5b2 d1onqa1  
d2bc4a2 d1de4a1 d1k8da1 d1tcra2 d1dn0b2 d1nfde2 d2xwtb2 d1bfoa2  
d1mexh2 d1iakb1 d1ypzf2 d4f7ea2 d1q7212 d2fbjh2 d1fe8h2 d1clzh2  
d1fngb1 d1uvqa1 d1vgka1 d1c16a1 d4j12a2 d4x99b2 d1igtb3 d1je6a1  
d1q72h2 d1nldh2 d1teth2 d2hmic2 d1ilca2 d1ilca1 d1k8ib1 d1q0yh2

d1kfa12 d3frua1 d1pg7w2 d1u58a1 d1igyb4 d1igyb3 d1hyrc1 d1deeb2  
d1c12b2 d2bc4b2 d2ig2h2 d1kcvl2 d3wn5b1 d1lk2b\_ d1lk3l2 d1mju12  
d1sm3h2 d1q0xh2 d1zvsal d1ydpal d1u8ib2 d1ypze2 d1kcuh2 d1op9a\_  
d1y0la1 d1etzb1 d1legj11 d2gsib1 d1nj9a1 d4jfhdl d1aqkl1 d1t2ja\_  
d1lo4h1 d1zvya1 d3v4vl1 d4enec1 d1kxtb\_ d5e8ea1 d2pxya\_ d4weud\_  
d1xiwc\_ d2esvd1 d1qznh\_ d1ogae1 d1f4xh1 d4n1hb\_ d3ezjb1 d3mlwl1  
d1kfah1 d1etza1 d1b4jh1 d3cfic\_ d4w68a\_ d2arja1 d1ek3a\_ d2ok011  
d1vera\_ d1uwgh1 d1blnb1 d1fpth1 d1rzga1 d2giya1 d4m3kb1 d1nc2a1  
d2nyyd1 d1ncna\_ d1fbih1 d5dxwa\_ d4fqqa1 d1dqdhl d1jfq11 d1kelh1  
d1faih1 d1frgl1 d1figl1 d4m6n11 d1fo0a\_ d4hxb11 d3b5ga\_ d3quyd1  
d2h9gb1 d1i8kb\_ d2dd8h1 d2ck0h1 d1eaja\_ d4w6wb1 d2a6ib3 d1t66d1  
d2e27h\_ d1ob1b1 d1f11b1 d2v7na1 d1ad0a1 d2xt1b1 d1pskh1 d4i13b1  
d2op411 d1a0q11 d1uwel1 d1za3a1 d1ncb11 d4uu9a\_ d1bm3h1 d1cloh1  
d1nqba2 d1cf8h1 d4y5va\_ d1mhph1 d5anma1 d4cdgc1 d4ldeb\_ d1y01b1  
d2pcpb1 d1z3gl1 d1dfb11 d1fh5h1 d3g5xa1 d1tzib1 d4dn3l1 d3zhka1  
d2b1hh1 d2uyla1 d1f3dh1 d1nj9b1 d2agjh1 d2h1pl1 d1q72h1 d8fabb1  
d1ndmb1 d1rjca1 d4u6hb1 d3upca\_ d2fbj11 d1osph1 d1tvda\_ d2cjh\_  
d4fhbd1 d1bd2d1 d1rz7h1 d3nn8a\_ d1blna1 d1knoa1 d1nfda1 d2bmkb1  
d1dq11\_ d1igyb1 d1igf11 d12e8h1 d3utza1 d1nc2b1 d1rihh1 d4mwfb1  
d4jvpa1 d1mieh1 d1rhfa1 d1fgn11 d1sbs1 d1lp9e1 d1dn0a1 d4lqf11  
d1iaih1 d1kgcd1 d1mh5b1 d1gpol1 d2g60h3 d1f8t11 d2jixd1 d4grwh\_  
d1fo0b\_ d1bfob1 d1axsa1 d1u9ka\_ d1nmbh\_ d1h8na1 d1h8na2 d1jguh1  
d4eura1 d3sdy11 d35c8h1 d1w7211 d1mvub\_ d1i9rh1 d1ob1a1 d4wenb\_  
d1yeeh1 d3ietc1 d1f58h1 d1ad0b1 d1mqkl\_ d1nbvh1 d4b50a\_ d3r8bb\_  
d1baf11 d1mamh1 d4rgne1 d2gsgb\_ d35c811 d1bafh1 d1ai1h1 d2pcpa1  
d2fath1 d2x1pa\_ d1orsb1 d1libg11 d1shma\_ d1a2yb\_ d1u0qa\_ d2coqa\_  
d1hilb1 d1qfwi\_ d1jv5b\_ d1fn4b1 d5e0qa\_ d1nsnh1 d1plgl1 d4ocx11  
d1kb5h1 d1rzfh1 d1pg7x1 d2fx7h1 d2oi9c\_ d1l7i11 d3eyva1 d1d5i11  
d4ffyl\_ d1tet11 d1a6wh\_ d1ac6a\_ d3dvfa\_ d1nfde1 d1mimh1 d1ri8a1  
d1jhlh\_ d3dura\_ d1fskb1 d1f97a1 d3so3b1 d2ak4d1 d1lp9f1 d4z7wf1  
d1l7th1 d4y5ya\_ d4x7ec1 d1emth1 d1ikf11 d1nlbh1 d4utal1 d1bjma1  
d1eapb1 d1u6ah1 d2dtgd1 d1kj2b\_ d1xeda1 d1cleh1 d1fgvh\_ d2bnub1  
d2fb4h1 d2dtgb1 d1ktrh\_ d1jpth1 d1qkz11 d4hepg\_ d2atpb1 d1flrh1  
d2hrpl1 d1mvfa\_ d1iaim1 d3k80a1 d2jb5h1 d3zkxc\_ d4grwe\_ d1it9h1  
d1rhhb1 d3w9ec\_ d1e4wh1 d1sy6h1 d2j6eh1 d3qxta\_ d1jglh1 d1p7ka1  
d1tzhb1 d4n8pa1 d1gaf11 d2jelh1 d1wioa2 d4i0cc1 d1cicb1 d1lmka2  
d1lmka1 d1iqwh1 d1orqb1 d1ejoh1 d1jnlh1 d4zg1a\_ d43c9b\_ d1ggbl1  
d1wej1h1 d3q6fa1 d1f3dj1 d3c6la1 d1bqlh1 d3p9wb\_ d1a3r11 d1h0db1  
d2uzil\_ d1eo811 d1qfwl\_ d1n7ml1 d1igja1 d1c5ch1 d2a9mh\_ d1rmfh1  
d1fj1b1 d4heme\_ d1ccza1 d1a5fh1 d1ogad1 d1dlfh\_ d1qa9b\_ d1vgel1  
d3qskb\_ d1sjxa\_ d4ozfg1 d1sq2n\_ d1qd0a\_ d1kcvh1 d1c5db1 d3qcull1  
d8faba1 d3bn9d1 d1mjuh1 d4y8dc\_ d7fabh1 d3dvgb1 d1lo011 d1a6tb1  
d1gigh1 d1kcrh1 d2hwz11 d1yjdc1 d3clf11 d4krna\_ d1d171\_ d1e6ol1  
d1mexh1 d3r0ma\_ d4kkna\_ d1fns11 d1oaqh\_ d1rzia1 d1lucb1 d1ncw11



d4b41a\_ d1nfdfl d2mpah1 d2d7t11 d4grwf\_ d4b5ea\_ d11k3h1 d3u79a\_  
d4u3xa\_ d1ghfl1 d1bvkb\_ d1mcww1 d1b88a\_ d1jrhh1 d32c2b1 d4wemb\_  
d1dsfh\_ d1op3h1 d1ce111 d1liqda1 d1qoka1 d1qoka2 d1qfuh1 d2crya1  
d1ay1h1 d1loaq1\_ d3ab0b\_ d1rur11 d1t4kb1 d1bz7b1 d1n0xh1 d1for11  
d1ucbl1 d4w6yb\_ d43c9a\_ d2aab11 d1tzia1 d4n1ca\_ d1k6qh1 d3g9ab\_  
d4tvsa1 d1lignh\_ d1pz5b1 d3dx9a1 d3wxwh\_ d1nakh1 d1kcul1 d3eaka\_  
d4qlra1 d1cr911 d1d9ka\_ d1f4x11 d1deea1 d2i27n2 d1c12a1 d2orb11  
d1j8hd1 d1mcph1 d1c5da1 d1kenh1 d1bd2e1 d1h5ba\_ d4x7fc1 d3upaa\_  
d1t3fa1 d1lindh1 d2dtgc1 d4hc111 d1zv5a1 d4wgvb\_ d1uwgl1 d4f37k1  
d1aqkh1 d1vesa\_ d3zkqd\_ d1fpt11 d1l0411 d1knob1 d3rrqa\_ d1ct8b1  
d4orz\_ d1mlbb1 d4hgkc1 d1dqdl1 d1bogb1 d4ozhe1 d1dr9a1 d1i7za1  
d1dn0b1 d1kell1 d1rzib1 d1ypzf1 d1wtla\_ d1hkfa\_ d1fail1 d1figh1  
d2vyre\_ d1sjva\_ d1ohqa\_ d1bfoa1 d1pkqb1 d1mjul1 d1b4j11 d1nsl11  
d2arjb1 d1p4bh\_ d4aj0a\_ d3nn8b\_ d2rcja1 d1f2xk\_ d4v1dd\_ d1adqh1  
d2eksa\_ d4k3ga\_ d1jfqh1 d1uweh1 d1frgh1 d4gftb\_ d1uz8b1 d4n1ea\_  
d1bm311 d1cl0l1 d3mcka1 d2vq1a1 d1ae6h1 d4aq1b1 d1uj3b1 d1nbqa1  
d1fh511 d2ck011 d2ywza\_ d1q7211 d4nxbx\_ d1hila1 d4hzb11 d2j8811  
d1zmya1 d1cd0a\_ d1a4ka1 d1pskl1 d1a0qh1 d4krmb\_ d1ncbh1 d2fbjh1  
d1j8he1 d1i3ua\_ d1cf811 d1fe8h1 d2plya1 d1eeqa\_ d2x89a\_ d1o10a\_  
d2r01h1 d1ub5a1 d1dfbh1 d3eyvb1 d4jdvb1 d4p2cg\_ d2gsia1 d2agj11  
d1u3ha1 d2h1ph1 d1rih11 d1fskc1 d1boga1 d2a7711 d1ospl1 d1qfoa\_  
d3dwt\_ d2fx711 d1rz711 d3stba1 d1pkqa1 d1b6da1 d1dzba2 d1dzba1  
d1kj2a\_ d4l1ha\_ d1rzgb1 d1dq1h\_ d12e811 d1miel1 d1jmaa\_ d1sbs11  
d1fgnh1 d1f5811 d1mqkh\_ d1ndgb1 d3qeg11 d1ia111 d2aw2a1 d1tqbc1  
d3fo2a1 d4dkaa\_ d1f8th1 d2g6011 d2ywy\_ d1uj3a1 d1yc7a\_ d3bd3a\_  
d4w6xb1 d1nmb1\_ d1i8ka\_ d1rjlb1 d1ypze1 d1p7kb1 d1kxqe\_ d1gpoh1  
d2z4qa1 d1w72h1 d1i9r11 d4qgya1 d4xt1c\_ d2qqnh1 d1cica1 d3c08h1  
d2cd0a\_ d2bdnh1 d1hnga1 d1maml1 d1nldh1 d1cr9h1 d4lcih1 d3bkyh1  
d3qg711 d1ai111 d1kxvc\_ d4iosd\_ d1l7ih1 d2x1qa\_ d1ub6b1 d3k74b\_  
d1libgh1 d1teth1 d1igya1 d1hxma1 d2x6ma\_ d2e71a\_ d5e03a\_ d1qfwm\_  
d2r0kh1 d1igjb1 d1rurh1 d1plgh1 d1mj8h1 d1yuhb1 d3fmg11 d1rzfl1  
d1emt11 d1ad9b1 d1igtb1 d1nlb11 d1d5ih1 d3k7ua\_ d4ffyh\_ d1bwwa\_  
d3dvgal d1a6ta1 d1fgvl\_ d4qxgl1 d1mim11 d1jh11\_ d2hffb1 d2hh011  
d1qkzh1 d1l7t11 d1afvh1 d1iaii1 d2cjuh\_ d1um5h1 d2ghwb2 d2ghwb1  
d1kgce1 d2fgwh1 d1ikfh1 d1dvfd\_ d2i24n1 d2xtjb\_ d1za3b1 d2yc1a\_  
d2hh0h1 d2x1oa\_ d1bvka\_ d1rjla1 d5e7ba1 d1igta1 d1i11b1 d2fb411  
d1mvua\_ d1jpt11 d32c2a1 d1fvca\_ d1liqdb1 d2hrph1 d2p4ab\_ d4qo1a\_  
d1p2cb1 d1wt5c\_ d1t4ka1 d5c1mb\_ d1it911 d1bz7a1 d1b2wh1 d1e4w11  
d1jnl11 d1yedb1 d1za6b1 d3u7aa\_ d1igfh1 d3gnm11 d1orsa1 d1wejl1  
d1a2ya\_ d1hxmb1 d1gafh1 d2j4wh1 d1pz5a1 d1j05a\_ d1a3rh1 d4fq111  
d1qfwh\_ d1eo8h1 d1n7mh1 d4s11a\_ d1kegh1 d5da4a\_ d1iqw11 d3whxb1  
d1vgeh1 d1deeb1 d1c12b1 d1t2ql1 d1ad9a1 d3gsnb1 d3b2uc1 d1ggbh1  
d1t3fb1 d1nak11 d4ocmc\_ d1lila1 d2v7hb3 d2esve1 d1mcoh1 d2qr0b1  
d2q3aa\_ d1ct8a1 d1kcr11 d2pxyb\_ d2uzih\_ d5c3ld\_ d3durb\_ d2ak4e1

d1dl7h\_ d1xiwd\_ d1mlba1 d1rmfl1 d1i7zb1 d1dlf1\_ d2xa3a\_ d5bq7b1  
d1dqqb1 d3h42l1 d1egjh1 d1kcvl1 d1fe8l1 d2j6e11 d1f3rb2 d1lk3l1  
d1sm3h1 d1q0xh1 d1ghfh1 d7fabl1 d1igch1 d1lo0h1 d4idla\_ d5c2bl\_  
d1jrh11 d1l1l1a1 d3zhda1 d4kfzc\_ d1b0wa\_ d1e6oh1 d1mexl1 d4krpb\_  
d1fnsh1 d1ncwh1 d4hgma\_ d4eigb1 d4rzca\_ d2mpa11 d4y5xa\_ d5en2b1  
d3lrga1 d4ej1c1 d1rhha1 d1j05b\_ d1forh1 d1q9wb1 d2wzpd\_ d2aq2a1  
d1h0da1 d3revb1 d2ij0c1 d1tzha1 d4m7jl1 d1k6ql1 d3b9kc1 d1igml\_  
d3qeua1 d1dsfl\_ d1ce1h1 d1kcuh1 d1zvha1 d1zvoa1 d1tqbb1 d1ay1l1  
d2qsc11 d2cgrh1 d1n10h1 d1ken11 d3eo0a1 d4n9ob1 d1n0x11 d3k1kc\_  
d1c4qa\_ d1prtc1 d2wv6d\_ d1prtf\_ d1l1trd\_ d4l63b1 d1r4pb\_ d1prtd\_  
d1t10f\_ d1prtb1 d3chbd\_ d2aq2b1 d1ck1a1 d1enfa1 d1i4pa1 d1v1oa1  
d1et9a1 d1esfa1 d2g9hd1 d4ohja1 d1klud1 d1bxta1 d1eu3a1 d1ty0a1  
d2cqva1 d1fhga\_ d2k1ma\_ d2d12a1 d1biha3 d1biha1 d1biha4 d3qp3a1  
d1g1ca\_ d1gxea\_ d1cvsc2 d1cvsc1 d1xmwa2 d1m4ka2 d2otpa2 d1biha2  
d1rhfa2 d2fcba2 d2fcba1 d1wwbx\_ d1gsma2 d1epfa1 d1epfa2 d2dava1  
d1waaa\_ d1f97a2 d1x44a1 d1vcaa2 d1fnla2 d1fnla1 d3b5ha2 d3h8na2  
d3h8na1 d1jbja1 d1jbja2 d1pd6a\_ d1f2qa2 d1f2qa1 d3cx2a\_ d1nbqa2  
d3b5ha1 d1n26a1 d1xiwb\_ d1xaua\_ d1fltx\_ d2ifga1 d1olla1 d1olla2  
d1cs6a4 d1cs6a3 d1cs6a2 d1cs6a1 d2gw5a2 d1sy6a1 d1xiwa\_ d1lucta2  
d1lucta1 d1ry7b2 d1gl4b\_ d1qz1a3 d1olza1 d2c9aa1 d1wwca\_

**Family-6 (a.22.1.3)**

**Positive dataset contains 3 protein sequences.**

d2byka1 d4g92b\_ d2bykb1

**Negative dataset contains 4008 protein sequences.**

d1m32a\_ d1libja\_ d1c7na\_ d1iuga\_ d4q75a\_ d2bkwa1 d1t3ia\_ d1n8pa\_  
d1qz9a\_ d1jff9a\_ d1p3wa\_ d3kgwa\_ d1cl1a\_ d2ctza1 d1vjoa\_ d2rfva\_  
d1gc0a\_ d1cs1a\_ d1d2fa\_ d2ch1a1 d1qgna\_ d1pffa\_ d1elua\_ d1u08a\_  
d1lc5a\_ d1b5pa\_ d2ay1a\_ d1bw0a\_ d3pd6a\_ d7aata\_ d2csta\_ d1j32a\_  
d1fg7a\_ d4wlha\_ d1o4sa\_ d1v2da\_ d1gdea\_ d1m6sa\_ d1v72a1 d1svva\_  
d1ajsa\_ d1wsta1 d2f8ja2 d1lk9a\_ d1vp4a1 d1xi9a1 d2gb3a1 d1js3a\_  
d3rcha\_ d3k40a\_ d1xkta1 d2hfka\_ d1jmkc\_ d5d3ka\_ d2cfba1 d1dfoa\_  
d1bj4a\_ d3k28a\_ d2bwpa\_ d3lg0a\_ d2fnua\_ d3ou5a\_ d1z7da1 d1b9ha\_  
d1iaya\_ d4msoa\_ d1bs0a\_ d1s0aa\_ d1sffa\_ d3tqxa\_ d1mdoa\_ d3qboa\_  
d3pgya\_ d1bjna\_ d2dkja\_ d1ejia\_ d1vefa1 d4wxga\_ d3bs8a\_ d3gbxa1  
d1w23a\_ d2b5aa1 d2ofya1 d4mcxa\_ d2xi8a\_ d2icta\_ d2bnma1 d2ppxa1  
d1y7ya1 d1sefa\_ d1sfna\_ d1sq4a\_ d1g8fa3 d1qnia1 d1libya\_ d1js9c\_  
d1f15b\_ d1za7a\_ d1gyca3 d1hfua2 d1kbva1 d1kbva2 d1sdda1 d1sdda2  
d1gyca1 d1gyca2 d1mzya1 d2bw4a1 d1aoza1 d1aoza2 d1kyaa2 d1kyaa3  
d1kyaa1 d1mzya2 d4e9sa1 d1sddb1 d1sddb2 d1hfua1 d1hfua3 d1oe1a2  
d1oe1a1 d1v10a2 d1v10a3 d1v10a1 d2dara2 d2dara1 d1wyha2 d2dloa2  
d1rutx4 d1rutx3 d2cuqa2 d1x41a2 d1x41a1 d1x3ha2 d1x3ha1 d2d8za1  
d1x61a2 d1x6aa1 d1x6aa2 d2cora2 d2cora1 d1v6ga1 d1v6ga2 d2d8za2  
d1x64a1 d1x64a2 d1b8ta1 d2co8a1 d1x63a2 d2dj7a2 d2dj7a1 d2cu8a2  
d2cu8a1 d1g47a2 d1g47a1 d1j2oa1 d1wyha1 d2dloa1 d1wiga1 d1wiga2

d2cupa2 d2cupa3 d1x68a1 d2d8ya2 d2d8ya1 d1m3va2 d1x62a1 d1x68a2  
d1x61a1 d1b8ta3 d1b8ta2 d2d8xa2 d2d8xa1 d1x4ka1 d1x4ka2 d2cuqa1  
d1m3va1 d2co8a2 d1x63a1 d2cura1 d2cura2 d1x62a2 d3sxwa1 d1j3qa\_  
d41luka\_ d1a3qa1 d1iknc\_ d3brda1 d1p7hl1 d1oy3c\_ d1gjia1 d1zk9a1  
d2cxka1 d2bema\_ d1pama1 d1ea9c1 d1qhoa1 d2fhfa2 d2fhfa1 d1k3ia1  
d1j0ha1 d1cx1a1 d2bhua1 d1edqa1 d1f1sa2 d1ut9a2 d1gvia1 d1txka1  
d1zx5a1 d2ph1a2 d1fxza2 d1fxza1 d1lrha\_ d1uija1 gldgw.1 d2v09a\_  
d1uika2 d1uika1 d1dgwa\_ d2pa7a1 d1wlta1 d1nxma\_ d2c0za1 d1nepa\_  
d1ds6b\_ d1fstb\_ d1g0da1 d1v70a\_ d2f4pa1 d1yhfa1 d2bjca1 d2hsga1  
d1qpza1 d1ebfa2 d1e3oc2 d1ic8a2 d2ovga\_ d1sq8a\_ d1rzs\_ d3kz3a\_  
d3orca\_ d3gpdg2 d2q49a2 d1hdgo2 d2g17a2 d2cvoa2 d2czca1 d3pwka2  
d1obfo2 d1i32a2 d1zyao2 d2pkqo2 d1b7go2 d2hjsa2 d1cf2o2 d1vkna2  
d1nvm2 d2msya\_ d2djoa1 d2r5za\_ d1au7a1 d1f43a\_ d2lmda1 d1akhb\_  
d1s7ea1 d3nara\_ d1zq3p1 d2craa1 d1mija\_ d4uuta\_ d3a01a\_ d1x58a1  
d3rkqa1 d3cmya1 d2cqxa1 d2da6a1 d1e3oc1 d1fjla\_ d1mh3a1 d1ig7a\_  
d1x41a1 d1wh7a1 d1gt0c1 d2mw8a\_ d1lfup\_ d1x2ma1 d1b72a\_ d1wi3a1  
d1wjha1 d1x2na1 d1mnm\_ d2cuea1 d3k2aa\_ d2hosa\_ d2jwta2 d1pufa\_  
d1octc1 d2hi3a\_ d1b8ia\_ d4j19a\_ d3lnqa\_ d1wh5a1 d1b8ib\_ d1hcra\_  
d1gdta1 d1u78a2 d6paxa1 d1k78a1 d1k78a2 d1hlva1 d1hlva2 d1iufa2  
d1iufa1 d1b10a2 d1d5ya1 d1d5ya2 d1prt2 d3lv8a\_ d1s3ga1 d1zaka1  
d1s4qa\_ d3tvta2 d1uf9a\_ d1khta\_ d1cke\_ d1osna\_ d1p5zb\_ d4tmka\_  
d3cm0a\_ d1tmka\_ d1jaga\_ d3h86a\_ d1t0hb\_ d1nn5a\_ d2h92a\_ d3kb2a1  
d2c95a1 d1yj5a2 d1kgda\_ d2ak3a1 d1vyva2 d1deka\_ d2grja1 d1p3ja1  
d1y63a\_ d1e4ya1 d1s96a\_ d3iija1 d1lvga\_ d1nksa\_ d1vyua2 d4e22a\_  
d1qf9a\_ d1jjva\_ d1q3ta\_ d1ki9a\_ d1lw7a2 d1teva\_ d1kjwa2 d1gsia\_  
d1z0ja1 d3umra2 d3gj0a1 d2gaoa1 d1yzga1 d1x3sa1 d1g7sa4 d1puja\_  
d1udxa2 d1kk1a3 d2o52a\_ d1jwyb\_ d1zcaa2 d1zcba2 d2fv8a1 d2cjwa\_  
d3dz8a1 d1xzpa2 d1vg8a\_ d4qxaa\_ d2ew1a1 d1x1ra1 d2bcgy\_ d3doea1  
d3cona\_ d3rega\_ d3wyga\_ d1upta\_ d2b6ha1 d1zd9a1 d1lnza2 d1r5ba3  
d1n0ua2 d1r2qa\_ d2f91a1 d2rhda\_ d3q3jb\_ d3q85a\_ d1efma1 d1r8qa\_  
d2gf9a1 d2akab1 d1ek0a\_ d1z08a1 d2gcoa1 d2dy1a2 d4g01b\_ d2cxa1  
d1svia\_ d3q72a\_ d1ni3a1 d4ac9a4 d2erxa1 d2bmea\_ d1wxqa1 d2gf0a1  
d41dja1 d1zunb3 d41v5b\_ d1efca3 d1kmqa\_ d2g6ba1 d3lrpa\_ d1tada2  
d2y8ea\_ d4rd4a1 d1z06a1 d2heia\_ d3a58b\_ d1u01a2 d1d2ea3 d1zj6a1  
d2ocba\_ d3rwoa\_ d1mr3f\_ d2e9sa1 d4u5xa1 d2iwra\_ d2fn4a1 d3bwdd\_  
d2nzja1 d2atva1 d2ksqa\_ d3l43a\_ d1mkya2 d1mkya1 d1wmsa\_ d1jnja3  
d2rmka\_ d1f6ba\_ d1f60a3 d1gota2 d1jala1 d2fh5b1 d1g16a\_ d2wblc\_  
d1m7ba\_ d1wf3a1 d1f5na2 d1t9ha2 d1z6xa1 d1z0aa1 d2fg5a1 d2a5ja1  
d2bcjq2 d1s0ua3 d1ky3a\_ d4y0va\_ d4lhwa\_ d2qmea1 d2atxa1 d1legaa1  
d1ryha\_ d1moza\_ d1nrjb\_ d2erya1 d3bfka\_ d1puia\_ d1fzqa\_ d3j3az1  
d3t5ga\_ d1shza2 d3defa\_ d2f7sa1 d3raba\_ d3tsoa\_ d3aq4a\_ d2a17a1  
d3sfva1 d3bc1a\_ d2ncda\_ d1sdma\_ d3h4sa1 d2heha\_ d2grya\_ g3kin.1  
d1kk8a2 d1br2a2 d1goja\_ d1f9va\_ d2mysa2 d1lkxa\_ d3t0qa\_ d4db1a1  
d3gbja\_ d1ry6a\_ d1kv9a1 d1k8ka2 d1k8ka1 d3uleb1 d3i33a2 d3i33a1

d1bupa1 d1dkgd2 d1dkgd1 d4ci6a2 d1jcfaf1 d4a2ba2 d2fxua1 d1yaga2  
d1yaga1 d4cbua2 d1bupa2 d3vrda1 d3vrda2 d1fcfdc2 d1h1oa2 d1h1oa1  
d1m70a2 d1m70a1 d1liqca2 d1liqca1 d1leb7a1 d1nmla2 d1nmla1 d1nira1  
d1hroa\_ d4gedb\_ d3zooa\_ d1mz4a\_ d1gu2a\_ d1f1fa\_ d1dvva\_ d1c6ra\_  
d1c75a\_ d1e29a\_ d1gdva\_ d1cnoa\_ d1h32b\_ d1co6a\_ d2bh4x\_ d2aiua\_  
d5cytr\_ d1jdl1a\_ d1i8oa\_ d2zboa\_ d3dmia\_ d1ls9a\_ d1wvec\_ d2yk3a\_  
d3ph2b\_ d1dw0a\_ d5aura\_ d1ql3a\_ d1qn2a\_ d1f1ca\_ d2nqya\_ d1h4ga\_  
d1hixa\_ d1oa2a\_ d1olra\_ d3b7ma\_ d4h7ma1 d3wp3a\_ d2vgda\_ d1igoa\_  
d3zsea\_ d2nlra\_ d3wx5a\_ d1oa3a\_ d1pvxa\_ d1m4wa\_ d1f5ja\_ d1oa4a\_  
d1ks5a\_ d4ixla1 d1h32a1 d1etea\_ d3tgxb\_ d1scfa\_ d2z3qa1 d3qb1a\_  
d1hula\_ d1m48a\_ d4nkqb\_ d1eera\_ d1v7mv\_ d5e4ea\_ d2o27a\_ d3b5ka\_  
d2psma1 d4zf7a\_ d3uf5a\_ d4x51a\_ d4ypgc1 d3oq3a\_ d1lqsl\_ d1n1fa\_  
d1aula\_ d1wu3i\_ d3bes1\_ d3ux9a\_ d1v8fa\_ d2ejca\_ d3muea1 d1lihoa\_  
d3q12a1 d4dnxa2 d1m8pa2 d1v47a2 d1jhda2 d1x6va2 d3rbaa\_ d2qtra\_  
d1nupa\_ d3l92a\_ d1f9aa\_ d1qjca\_ d2h29a\_ d1vlha\_ d1od6a\_ d1mrza2  
d4ruka\_ d2e17a\_ d1liq0a2 d1irxa2 d1r6ta2 d1ivsa4 d2cyba\_ d1rqga2  
d1j09a2 d2yxna\_ d1f7ua2 d1h3fa1 d1ffya3 d2g36a1 d1nzja\_ d1jjila\_  
d1i6la\_ d1pfva2 d1h3na3 d3n9ia\_ d3sz3a1 d3sw2a\_ d1moxc\_ d1dx5i3  
d1edmb\_ d1autl2 d1autl1 d1nqlb\_ d1dval1 d1szba2 d1kigl\_ d2y5fl\_  
d1ijqa2 d1gk5a\_ d1g1sa2 d1nt0a3 d1xdtr\_ d1lmja2 d1lmja1 d1nzia2  
d2wphe\_ d1klil\_ d1pfxl2 d1pfxl1 d1p9ja\_ d1glta2 d1f7ea\_ d4yzub\_  
d2mgpa1 d1b9wa1 d1b9wa2 d2mgpa2 d1ob1c2 d1n1ia2 d1n1ia1 d2npra2  
d2npra1 d1gl4a2 d1f56a\_ d1bypa\_ d1azca\_ d1ws8a\_ d3u25a\_ d1cuoa\_  
d1id2a\_ d1rkra\_ d2iaac\_ d4dp1x\_ d1nwpa\_ d2gima\_ d2i7sa\_ d1qhqa\_  
d1qx2a\_ d2y5ia\_ d1qlsa\_ d1psra\_ d3n22a\_ d2egda\_ d4ggfc\_ d2wcea\_  
d2luca\_ d4aqia\_ d3nsia\_ d2lp3a\_ d1j55a\_ d1a4pa\_ d1k8ua\_ d1nsha\_  
d1pvaa\_ d3fs7a\_ d2pvba\_ d1ttxa\_ d1rwy\_ d2kyfa\_ d1rk9a\_ d1a75a\_  
d1tizal d1nyaa\_ d1g8ia\_ d1ggwa\_ d1wdcc\_ d3fwba\_ d1ggza\_ d2o5ga\_  
d1ctaa\_ d1m45a\_ d3i5gc\_ d1sl8a\_ d1fpwa\_ d2scpa\_ d2roaa\_ d4aqra\_  
d3pn7b\_ d1br1b\_ d2mysb\_ d1s6ca\_ d1bjfa\_ d2obha\_ d1jfka\_ d1jfoa\_  
d1qv0a\_ d1lkja\_ d2mlfc\_ d2m97a\_ d2d8na\_ d4by5a\_ d1jbaa\_ d4nqga\_  
d1wdcb\_ d2mysc\_ d1j7qa\_ d1s6ia\_ d1uhka2 d1r2ua\_ d1dtla\_ d3kf9a\_  
d3pn7c\_ d1fi6a\_ d1c07a\_ d5d67d\_ d1tuza\_ d1h8ba\_ d1leg3a1 d1leg3a2  
d2zkmx1 d1snla\_ d1gjya\_ d1y1xa\_ d1hqva\_ d1df0a1 d1qxp2a\_ d4usla\_  
d1k94a\_ d1wkya2 d1uuqa\_ d3wh9a\_ d4mlra\_ d1xyza\_ d4xuya\_ d2je8a5  
d4bf7a1 d3cuia\_ d1ur4a\_ d1qw9a2 d1odza\_ d2vzsa5 d1bqca\_ d2x2ya1  
d1hjqa\_ d1qnra\_ d4y7ea1 d1vjza\_ d4k68a\_ d2v3ga\_ d4hpga\_ d1nofa2  
d1nq6a\_ d1h4pa\_ d1aq0a\_ d3ziza\_ d4bs0a\_ d1ecea\_ d1h1na\_ d1ta3b\_  
d1w91a2 d1uhva2 d1us3a2 d1legza\_ d7a3ha\_ d1tvna1 d3nyda1 d1ghsa\_  
d2cyga1 d4xv0a\_ d2c8na2 d1w32a\_ d3emca\_ d1v6ya1 d1foba\_ d2uwfa1  
d2fgla\_ d3niya1 d2c0ha1 d1rh9a1 d1yq2a5 d1szna2 d1fa2a\_ d1pama4  
d5do8a1 d1ea9c3 d1hx0a2 d2fhfa5 d1qhoa4 d1avaa2 d1m53a2 d4m8ua1  
d2gjpa2 d1lwha2 d4howa1 d1ktba2 d1j0ha3 d3vm5a1 d2x1ia\_ d1wzaa2  
d1uasa2 d2diea1 d1mxga2 d1ht6a2 d1eswa\_ d1iv8a2 d5cpsa\_ d1ud2a2

d1zjaa1 d3gbea1 d1kwga2 d1wdpa\_ d1gcya2 d1g5aa2 d1hvxa2 d3dhpa2  
d2bhua3 d4do4a1 d3qgva1 d1e43a2 d1g94a2 d2d3na2 d1gjwa2 d1gvia3  
d1x1na1 d1r7aa2 d1tz7a1 d4toqa\_ d1wb0a1 d1w9pa1 d1eoka\_ d1itxa1  
d1kfwa1 d1goia2 d1ledqa2 d2gsja\_ d1hjxa1 d1jnda1 d1vf8a1 d3wdpp1  
d3wq5a\_ d1gnxa\_ d4gxpa\_ d4hz8a\_ d1e4mm\_ d3aiua\_ d1wcga1 d1qvba\_  
d3ahxa\_ d1v02a\_ d2dgaa\_ d1pbga\_ d1vffa1 d1qoxa\_ d4ha4a\_ d1g4ma1  
d1id1a\_ d2hmta\_ d1lssa\_ d1liuka\_ d2csua1 d3q9ub\_ d2yv1a1 d3q9na\_  
d2d59a\_ d1oi7a1 d2yv2a1 d1y81a1 d3nvva1 d1krha3 d2h88b1 d1n62a2  
d1t3qa2 d1kf6b2 d1zoyb1 d1jq4a\_ d1dgja2 d1rm6c2 d1h6ta1 d1h6ua1  
d91dta1 d2ewda3 d1up7a1 d2dfda1 d1s6ya1 d1vjta1 d1hyea1 d1t2da1  
d1ojsa3 d1b8pa1 d1ldna1 d1hyha1 d1civa1 d2a92a1 d1ez4a1 d1i0za1  
d1y6ja1 d1gv0a1 d1ur5a1 d1ll1da1 d1obba1 d1npya1 d3t4ea2 d1a4ia1  
d2hk9a2 d2egga2 d1b26a1 d1bvua1 d1gq2a1 d1c1da1 d1leha1 d1gtma1  
d1euza1 d1nvtal d3dona2 d1ledza1 d1gpja2 d1vi2a1 d1p77a1 d1nyta1  
d1b0aa1 d1vl6a1 d1v91a1 d1etob\_ d1lumqa\_ d1g2ha\_ d1kola2 d1f8fa2  
d1qora2 d1jqba2 d1vj0a2 d1cdoa2 d1gu7a2 d1d1ta2 d1xa0a2 d2dm6a2  
d1jvba2 d1rjwa2 d1lllua2 d1tt7a2 d1piwa2 d1o89a2 d1iz0a2 d1e3ja2  
d1yb5a2 d1uufa2 d1vj1a2 d1e3ia2 d3gpdg1 d1vc2a1 d2nvwal d1u8fo1  
d1ydwa1 d1hdgo1 d2g17a1 d1cf2o1 d2czca2 d1r0ka2 d1obfo1 d2cvoa1  
d1ebfa1 d1h6da1 d1i32a1 d1zh8a1 d2q49a1 d1qkia1 d1j5pa4 d3pzra1  
d1xeaa1 d1vkoa1 d1vm6a3 d3qvsa1 d2pkqo1 d1b7go1 d1gr0a1 d1p1ja1  
d1lc0a1 d3pwka1 d2hjsa1 d1zyao1 d1vkna1 d1t1ta1 d1nvmbl d3sjua\_  
d3ojfa1 d1xu9a1 d2jjya1 d1n7ha\_ d1y1pa1 d1h5qa\_ d1jtva\_ d4fs3a\_  
d2bkaa1 d1gy8a\_ d2c5aa1 d1ulsa\_ d1ooea\_ d2b69a1 d1y5ma1 d1spxa\_  
d1aela\_ d1bxka\_ d1ydea1 d1gega\_ d1hdoa\_ d1o5ia\_ d1e6ua\_ d1snya1  
d2rhca\_ d3zv4a\_ d5ceja\_ d2d1ya1 d3w8ea\_ d2fmua1 d1x1ta\_ d1rpna\_  
d3ay7a1 d1k2wa\_ d1eq2a\_ d2hrba1 d3ruaa\_ d2ew8a1 d4hwka\_ d1xgka\_  
d2bd0a1 d1yo6a1 d2a35a1 d2ntva\_ d1vl8a\_ d1hdca\_ d4bkua\_ d2ag5a1  
d2q45a\_ d1nffa\_ d4iy1a\_ d1zbqa1 d1kewa\_ d1ek6a\_ d1ja9a\_ d2q46a2  
d1iy8a\_ d1cyda\_ d2ptga\_ d1hxha\_ d1uzma1 d3lyla\_ d4m89a\_ d3wyea\_  
d2blla1 d1w6ua\_ d1sb8a\_ d2q2va\_ d4nr0a\_ d1e6wa\_ d2gasa\_ d3oiga1  
d2bgka1 d1mxha\_ d1vl0a1 d1rkxa\_ d1r6da\_ d1wmaa1 d1e7wa\_ d2c07a1  
d1xkqa\_ d3tzha\_ d1g0oa\_ d3lz6a\_ d1qyca\_ d1ledoa\_ d1gz6a\_ d1loc2a\_  
d1t2aa\_ d1zema1 d2xoxa\_ d1z45a2 d1geea\_ d1p33a\_ d3lt0a\_ d4e6pa\_  
d2wyua\_ d1db3a\_ d4q9na\_ d1xhla\_ d4o1ma\_ d1fmca\_ d2uvda\_ d2gdza1  
d1uaya\_ d2z1ma\_ d2o23a2 d2fr1a2 d2fr1a1 d1qsga\_ d1qyda\_ d4zjua\_  
d2a4ka1 d1yb1a\_ d1wvga1 d1yxma1 d3f4ba\_ d1mg5a\_ d1xg5a1 d1r55a1  
d3gboa\_ d1atla\_ d1kufa\_ d1buda\_ d4q1la\_ d1quaa\_ d1yp1a\_ d1wnia\_  
d1ex0a4 d1g0da4 d2f4ma1 d1x3za\_ d1mdwa\_ d1qxp4 d1ziva1 d1zcma1  
d1t3ca\_ d1epwa3 d2a97a\_ d3f1ea\_ d3ioqa\_ d1fh0a\_ d1o0ea\_ d1khqa\_  
d1m6da\_ d2cb5a\_ g8pch.1 d1s4va\_ d2pnsa\_ d1vsna1 d1mira\_ d1iwda\_  
d2oula\_ d7pcka\_ d3bwka\_ d3bcna\_ d2p86a\_ d1pvja\_ d1pcia\_ d1gece\_  
d1deua\_ d4bs6a\_ d1xkga1 d1cqda\_ d1jqpa2 d2c0ya\_ d2bdza\_ d3p5ua\_  
d2o36a\_ d1ex4a2 d1c6va\_ d2jk6a2 d2jk6a1 d1feca1 d1feca2 d1lpfa1

d1lpfa2 d1xhca1 d1xhca2 d1dxla2 d1dxla1 d1gera2 d1m6ia2 d1onfa1  
d1onfa2 d3lada2 d3lada1 d1w4xa1 d1w4xa2 d1gesa2 d1mo9a1 d1xdia1  
d1fl2a2 d1fl2a1 d1fcda1 d1fcda2 d1h6va2 d1h6va1 d1mo9a2 d1gv4a2  
d1gv4a1 d2gv8a2 d2gv8a1 d1aoga2 d1hyua1 d1ebda1 d1ebda2 d3dk9a1  
d1q1ra2 d1q1ra1 d1gesa1 d1zbfal d2z1ha\_ d2etja1 d3qioa1 d1j1la\_  
d2e4la\_ d1j12a\_ d21sna1 d1io2a\_ d1uaxa\_ d2yv0x\_ d1mu2a1 d1lekea\_  
d1i39a\_ d1pn0a1 d1reoa1 d1ju2a1 d2f5va1 d3c96a1 d2gmha1 d1pj5a2  
d1gpea1 d1o5wa1 d1n4wa1 d1k0ia1 d2dw4a2 d2ivda1 d2voua1 d1kdga1  
d1s5ja1 d2hbja2 d2igia\_ d1wlja\_ d1qhta1 d4dlea1 d1tgoa1 d2f96a1  
d3tr8a1 d3mxma\_ d1q8ia1 d1y97a1 d1w0ha\_ d1kfsa1 d2py5a1 d1noya\_  
d1d5aa1 d1yt3a3 d2guia\_ d3mwpal d4kb1a\_ d2y8ga\_ d1xkea1 d1k5db\_  
d2y8fa\_ d2d5ra1 d1b9ra\_ d1frra\_ d3wcqa\_ d1e9ma\_ d1l5pa\_ d1wria\_  
d1i7ha\_ d3av8a\_ d1czpa\_ d1rfka\_ d3p1ma1 d3b2ga\_ d2bt6a2 d1wgqa1  
d1v89a1 d2coda1 d1zc3b\_ d1wg7a1 d1u5ea1 d1v61a1 d2coca1 d2ys1a1  
d1v5pa1 d1ntya2 d1wjma1 d1wi1a1 d1u29a\_ d1xx0a1 d1unqa\_ d2zkmx3  
d1fhoa\_ d1v88a1 d2adza1 d1x1fa1 d1p6sa\_ d2coaa1 d1btka\_ d1v5ma1  
d1faoa\_ d2x18a\_ d1dyna\_ d1x1ga1 d4kaxb\_ d2j59m1 d1kilb2 d1xcga2  
d1txda2 d1u5da1 d1dbha2 d1wlha\_ d1upqa\_ d1v5ua1 d1foea2 d2fj1a1  
d1eaza\_ d2dfka2 d2cofa1 d1kz7a2 d1r7ha\_ d1faaa\_ d1wika1 d1xfla\_  
d1ttza1 d2f51a1 d1ti3a\_ d1nhoa\_ d1sena\_ d2i4aa\_ d1ep7a\_ d1zmaa1  
d1fo5a\_ d3lefa1 d3diea1 d2yana1 d1z6na1 d1oaza\_ d3zywa1 d4aj8a\_  
d1nm3a1 d4fiwa\_ d1wmja\_ d4hs1a1 d1iloa\_ d1xwaa1 d1wjka1 d2vmla\_  
d1fb6a\_ d1gh2a\_ d1h75a\_ d1nw2a\_ d1pd212 d1nhya2 d2a2ra2 d1k0dd2  
d1f2ea2 d1gsua2 d1f3ba2 d2fhea2 d2pvqa1 d1tw9a2 d1oyja2 d1e6ba2  
d1k0ma2 d3ik7a1 d4is0a1 d1r5aa2 d1j1va2 d1m0ua2 d3gtub2 d1z9ha2  
d1okta2 d1axda2 d2gsra2 d1tu7a2 d1k3ya2 d1zgma1 d1b48a2 d1gnwa2  
d1gwca2 d2gsta2 d1glqa2 d1oe8a2 d1pn9a2 d1v2aa2 d1fw1a2 d1duga2  
d1ig8a1 d1czan2 d1czan3 d1czan1 d1czan4 d1bg3a4 d1bg3a3 d1bg3a2  
d1bg3a1 d1qqya\_ d1gd6a\_ d1f6ra\_ d1ivma\_ d2gv0a\_ d1iiza\_ d2z2fa\_  
d1j8xa\_ d1gh1a\_ d1b9oa\_ d1741a\_ d1691a\_ d2o4wa\_ d1p37a\_ d1k28a3  
d1xjta1 d1jtma\_ d2f2qa\_ d4e97a1 d1iyka2 d1iyka1 d1rxta1 d1iica2  
d2pjsa1 d2i7ra1 d1ecsa\_ d1xqaa1 d5cj3a1 d1npba\_ d1jifa\_ d2p7oa\_  
d1r9ca\_ d1nkia\_ d1mpya2 d1kw3b2 d1kw3b1 d4ghga1 d1tfza1 d3isqa1  
d3isqa2 d1sqia1 d1sqia2 d1lkda2 d1lkda1 d1mpya1 d1cjxa2 d1sp9b2  
d1t47a1 d1t47a2 d1flua2 d1sp8a1 d1sp8a2 d1flua1 d1f74a\_ d3l21a\_  
d2e1da\_ d1to3a1 d1w3ia\_ d1sfla\_ d1n7ka\_ d1vcva1 d4imea\_ d1wa3a\_  
d2ocza1 d1f2ja\_ d3m16a\_ d2yxga\_ d1ub3a\_ d3a5fa\_ d1fbaa\_ d1l6wa\_  
d1xfba1 d1wx0a1 d1vpxa1 d1ojxa\_ d1mxsa\_ d2a4aa1 d1xkya1 d3cq0a1  
d3s1xa\_ d1fdja\_ d3cpra1 d4d2ja\_ d1s5ja2 d1qhta2 d4dlea2 d1tgoa2  
d3py8a2 d1q8ia2 d1kfsa2 d2py5a2 d1d5aa2 d1qsta\_ d2beia1 d4m3sa\_  
d1u6ma1 d1ygha\_ d1yk3a1 d3dr6a\_ d1xmta\_ d1z4ea1 d2ge3a1 d1bo4a\_  
d2fiaa1 d2jdca1 d1y9wa1 d3to7a\_ d1wwza1 d2fl4a1 d2ozua1 d2b5ga\_  
d2cy2a1 d2p0wa\_ d1cm0a\_ d4pswa\_ d1yrea1 d1yr0a1 d1m4ia\_ d2gana1  
d1yvka1 d2g3aa1 d1y7ra1 d2euia1 d1q2ya\_ d2fsra1 d1xeba\_ d2ae6a1

d1cjwa\_ d1qsma\_ d2aj6a1 d1y9ka1 d1i12a\_ d1vkca\_ d2atra1 d1n71a\_  
d2d4pa1 d2fiwa1 d2fe7a1 d1tiqa1 d2ou2a\_ d1yx0a1 d2fcka1 d1p0ha\_  
d2j8ma\_ d2pq8a\_ d1z4ra1 d1s3za1 d1ufha\_ d2hqya1 d2hqya2 d1lrza2  
d1ne9a1 d1lrza3 d1f37b\_ d1xvqa1 d1pn0a2 d3hy2a\_ d2cvba1 d1o8xa\_  
d1lu4a\_ d1we0a1 d2bmx1 d2a4va1 d1psqa\_ d1xiya1 d1q98a\_ d1n8ja\_  
d1zofa1 d2ggta\_ d3tjja\_ d4je1a1 d1o73a\_ d3s9fa\_ d2zcta\_ d1qmva\_  
d1jfua\_ d2b1ka\_ d5dvba1 d2b5xa1 d2v2ga\_ d1st9a\_ d3tb2a\_ d4llra\_  
d4fh8a1 d1e2ya\_ d1knga\_ d2h30a\_ d1i5ga\_ d2z9sa\_ d2f8aa1 d1tp9a1  
d2b7ka\_ d1nm3a2 d3hvva\_ d2wfca1 d4kcea\_ d1xvwa1 d4gqca1 d3qpma\_  
d4k1fa\_ d1zzoa1 d1gp1a\_ d4od7a1 d1z6ma1 d4mcua1 d4dvca1 d1r4wa\_  
d3l9sa\_ d1un2a\_ d3rppa\_ d1yloa2 d1y7ea2 d1y0ya3 d1lfwa1 d1vixa1  
d1fnoa4 d1vhoa2 d1ysja1 d1vhea2 d1z21a1 d2fvga2 d1vgya1 d1r3na1  
d2grea2 d1xmba1 g1q7l.1 d1rtqa\_ d1ofda3 d1ea0a3 d1ecfa2 d1q15a2  
d1ct9a2 d1ao0a2 d1te5a\_ d1bnla\_ d1dy2a\_ d1cr6a2 d1j1ia\_ d2rhwa\_  
d3groa\_ d1thta\_ d1ei9a\_ d1ra6a\_ d1muka\_ d3gsza\_ d1khva\_ d1te9a\_  
d2xwha\_ d3uqsa\_ d3hkwa\_ d3n6ma\_ d2cjqa\_ d2xyma\_ d1teba\_ d1te8a\_  
d1u09a1 d4wfxa\_ d3tyqa\_ d2pgga1 d3zxha\_ d1cgl1a\_ d1rm8a\_ d1eaka2  
d2jsda\_ d1cxva\_ d1hv5a\_ d1i76a\_ d3p0ya1 d1igra1 d1igra2 d1n8yc2  
d1n8yc1 d1m6ba2 d1m6ba1 d1dzka\_ d4tlja\_ d2a2ua\_ d4wfv1a\_ d3t1da\_  
d4iaxa\_ d3zq3a\_ d2nnda\_ d1i4ua\_ d1kxoa\_ d1bbpa\_ d1kt7a\_ d1exsa\_  
d3s26a1 d1qfta\_ d4gh7a\_ d1z24a1 d1qabe\_ d1xkia\_ d1lew3a\_ d3bx7a\_  
d4iawa1 d1n0sa\_ d1gkab\_ d3kzaa\_ d2k23a\_ d2l9ca1 d2joza1 d1gm6a\_  
d3kffa\_ d3saoa1 d1e5pa\_ d1yupa1 d1iiua\_ d1h6ua2 d2tbvc\_ d1c8nc\_  
d1x36a\_ d1smvc\_ d1ng0c\_ d4sbvc\_ d1opoa\_ d1f2nc\_ d1cixa\_ d1y29a\_  
d1v7fa\_ d2jtba\_ d1d1ha\_ d1g9pa\_ d1lupa\_ d1qk7a\_ d1mb6a\_ d2a2va\_  
d1i25a\_ d1hvwa\_ d2mpqa\_ d1ie6a\_ d1kqha\_ d1la4a\_ d2mxoa1 d1d10a\_  
d1koza\_ d1qk6a\_ d1emxa\_ d1lqra\_ d1c6wa\_ d1rmka\_ d1ixta\_ d1eyoa\_  
d1cnaa\_ d1fu3a\_ d1g1pa\_ d1fyga\_ d1rypd\_ d1irua\_ d1rypc\_ d3unfk\_  
d1rypa\_ d1j2pa\_ d1irui\_ d1j2qh\_ d3unfh\_ d1m4ya\_ d1rypb\_ d1irul\_  
d1irug\_ d1iru2\_ d1q5rh\_ d1rypg\_ d1g3ka\_ d1iruf\_ d1q5qa\_ d1e94a\_  
d1irub\_ d1ryph\_ d3ty6a\_ d1iruj\_ d1iruk\_ d1rype\_ d1irud\_ d1irue\_  
d3mi01\_ d1rypf\_ d1iruh\_ d2z3ba\_ d1iruc\_ d3mka2\_ d1iru1\_ d1ny721  
d1ny722 d1a6ca3 d1a6ca2 d1pgl22 d1pgl21 d1pgl11 d1ny711 d1mqta\_  
d1d4m3\_ d1fmd3\_ d2mev1\_ g1aym.1 d1ev13\_ d4q4w1\_ d1r1a3\_ d2x5ia\_  
d1rhi1\_ g1r1a.1 g1d4m.1 g1rhi.1 d1b35b\_ d1loopa\_ d1tme1\_ d4iv1a\_  
g1pvc.1 g1fpn.1 d1fpn1\_ d4gb31\_ d1d4m1\_ d1fmd1\_ d1ev11\_ d2wzr3\_  
g1cov.1 d1qqp3\_ g1fmd.1 d2x5ic\_ d1rhi3\_ g1oop.1 d1hxs1\_ g1hxs.1  
d1fpn3\_ d1bev1\_ g2mev.1 d1eah3\_ d1aym1\_ d1pvc3\_ d1qqp1\_ d1zba3\_  
d1h8ta\_ d3vbhc\_ g1b35.1 g1bev.1 d1hxs3\_ g1ev1.1 d1bev3\_ g1tmf.1  
d1tmf1\_ d1b35a\_ d2mev3\_ g1eah.1 g1h8t.1 d1eah1\_ d4q4w3\_ d1r1a1\_  
d1aym3\_ d1zba1\_ d1h8tc\_ d1oopc\_ d1tme3\_ g1qqp.1 d4iv1c\_ g1tme.1  
d3ubub\_ d1legia\_ d1v7pa\_ d1tdqb\_ d3ubua\_ d1c3ab\_ d1h8ua\_ d3bx4b\_  
d1t8ca1 d1sb2a1 d1qdda\_ d2ziba1 d3cada\_ d1byfa\_ d1j34b\_ d1jwia\_  
d1jzna\_ d1c3aa\_ d1oz7b\_ d1wmza\_ d3bdwb\_ d1hq8a\_ d1fifa1 d1dv8a\_

d3hupa\_ dlwk1a1 dlumra\_ d2afpa\_ d3bx4a\_ dlgz2a\_ dlsl6a\_ dlv7pb\_  
d3g8ka\_ dlixxa\_ dlj34a\_ dljwib\_ dlgl1sa1 dly17a1 dlja3a\_ dlfvub\_  
d3bdwa\_ dl1sb2b1 dl1fvua\_ dl1umrc\_ dl1oz7a\_ d4m17a\_ d3cfwa1 dl1ypqa1  
dl1g1ta1 d3fd4a\_ d3l19jc\_ d4dn8a1 dl1v41b\_ dl1rd11\_ d2msba\_ d4w9ta\_  
dl1jvna1 d4x2ra1 dl1ka9f\_ d4axka1 dl1thfd\_ dl1h5ya\_ d4u28a\_ d2y88a\_  
d4wd0a\_ dl1vzwa1 d3ia2a\_ dl1a88a\_ d4dggqa1 dl1zoia\_ d2flia1 dl1rpxa\_  
dl1tqja\_ dl1tqxa\_ dl1ux8a\_ dl1dlya\_ d4i0va\_ d2bkma\_ d2bmma\_ d2r80b\_  
dl1cqxa1 dl1cg5a\_ dl1gcvb\_ d3boma\_ d2h8fb\_ d2raoa\_ d3bj1a\_ d4hrrb\_  
d2r50a\_ d3d1kb\_ d2aa1b1 d3zhwa\_ d3hf4b\_ d3gdja\_ dl1jebb\_ d3bj1b\_  
dl1x9fb\_ dl1wmub\_ dl1gcva\_ d3bcqb\_ d3d4xb\_ dl1gvha1 d2dc3a\_ d3hf4a\_  
d4yu3a\_ d3k8ba\_ dl1qpwb\_ d2r80a\_ d3bcqa\_ dl1v4wa\_ d3wtgb\_ dl1j17a\_  
d4esaa\_ dl1a9we\_ d3d1ab\_ dl1fsla\_ d4h21a\_ dl1v4wb\_ dl1mwca\_ dl1vhba\_  
dl1jeba\_ dl1spgb\_ dl1h97a\_ dl1q1fa\_ dl1tu9a1 d3d1aa\_ dl1hdsb\_ d3hyub\_  
d2zfb\_ d3fs4a\_ dl1oj6a\_ dl1shrb\_ d4h21b\_ d4yu3b\_ dl1spga\_ d3hrwa\_  
d3qqra\_ d3at5a\_ d4wchd\_ d3hyua\_ dl1cg5b\_ dl1uc3a\_ dl1hbra\_ d2raob\_  
dl1outb\_ d4esab\_ d3gdjb\_ d3qqqa\_ dl1x9fc\_ d3vrfa\_ dl1litha\_ d3mkba\_  
d3d4xa\_ d3mjpa\_ dl1j16a\_ d3fh9a\_ dl1outa\_ d2dc3b\_ dl1it2a\_ d3eoka\_  
d3g46a\_ dl1qpwa\_ d3vrfb\_ dl1x9fd\_ dl1hdsa\_ d2zfb\_ d3mkbb\_ dl1or4a\_  
d3wtga\_ dl1a4fa\_ d3fh9b\_ d3bomb\_ d3cy5a\_ d3at5b\_ dl1x9fa\_ d2oifa\_  
d4lmb\_ dl1cpcb\_ d3v57a\_ dl1kn1a\_ dl1cpca\_ d4f0ta\_ d2vjha\_ d4po5b\_  
dl1eyxa\_ d4f0tb\_ dl1b33b\_ dl1b8db\_ d4h0mb\_ dl1b33a\_ d2vjhb\_ d4lm6b\_  
d2vmlb\_ dl1a11b\_ d2vjta\_ d3dbja\_ d2vmla\_ d2vjtb\_ d4f0ub\_ dl1f99b\_  
d4rmpa1 dl1liaa\_ dl1eyxb\_ d2uulb\_ d4lmsb\_ d4f0ua\_ d2bv8a\_ dl1f99a\_  
d2bv8b\_ d2c71b\_ d3dbjb\_ d4rmpb1 dl1b8da\_ d4h0ma\_ d3v57b\_ dl1kn1b\_  
dl1liab\_ d2uula\_ d2j96a\_ dl1pjqa1 dl1f00i3 g1gxs.1 g1wht.1 dl1azwa\_  
dl1mtza\_ d2xqfa\_ dl1ea5a\_ dl1f6wa\_ dl1dx4a\_ dl1qe3a\_ dl1k4ya\_ d4qwwa\_  
d2ha2a\_ d3c8da2 d2pbla1 dl1jkma\_ dl1jjia\_ dl1jjfa\_ d4iuaa3 d4bvva\_  
d5hpga\_ d3k65a\_ dl1ki0a3 dl1ki0a2 dl1ki0a1 dl1a0ha1 dl1pmla\_ d3sp8a3  
d2feba1 d2m5ta\_ dl1cqqa\_ dl1wqsa\_ d5bpea\_ d2ipha\_ d2bhga1 d3tnta\_  
d3sjia\_ d3d23a1 d2fyqa\_ d3tloa\_ d3zvea1 d2hrva\_ d3q3ya1 d4asha1  
dl1e88a1 dl1l6ja5 dl1l6ja4 dl1eaka4 dl1eaka3 dl1l6ja3 dl1h8pa2 dl1h8pa1  
d3rp2a\_ g1lucy.1 dl1fuja\_ d2zchp\_ d3w94a\_ dl1si5h\_ dl1lo6a\_ g2pka.1  
dl1cgha\_ dl1kigh\_ dl1a5ia\_ d3s9ba\_ dl1hj8a\_ dl1ao5a\_ d2anya\_ dl1q3xa1  
dl1gvza\_ dl1azza\_ d4gsoa\_ d2f91a1 dl1iaua\_ dl1gdna\_ dl1eufa\_ g1fiw.1  
dl1eq9a\_ d4nfea\_ d2rdla\_ dl1spja\_ dl1elva1 dl1a7sa\_ dl1ekbb\_ dl1yc0a\_  
d2aiqa\_ g1fiz.1 dl1fi8a\_ d4k60a\_ d4dgja\_ dl1mzaa\_ dl1lop0a\_ d3tjva\_  
dl1pytd\_ dl1sgfg\_ g1gg6.1 d2eeka\_ g1rtf.1 dl1a0ja\_ d3g01a\_ dl1pytc\_  
d4e7na\_ dl1ddja\_ dl1z8ga1 d2hlca\_ dl1npma\_ dl1brup\_ g1jou.1 dl1sgfa\_  
dl1autc\_ g2hnt.1 g1kdq.1 dl1orfa\_ d3s69a\_ d4crga\_ dl1fxya\_ dl1bqya\_  
d2ftba\_ dl1pmpa\_ d2rcqa1 dl1fdqa\_ d4lkpa\_ dl1sa8a\_ dl1vyfa\_ dl1lpja\_  
d3vg7a1 d4azqa1 dl1o8va\_ d5bvqa\_ dl1p6pa\_ d2qo4a\_ dl1opba\_ dl1yiva1  
dl1o1va\_ d4bvma1 d4tkba\_ d4i3ba\_ dl1bwya\_ dl1ftpa\_ d4gkca\_ dl1cbia\_  
d3p6da1 dl1kqwa\_ d2a0aa1 dl1m41a\_ d2bk7a\_ d3fjua\_ dl1z5ra1 dl1kwma1  
dl1uwya2 dl1jqga1 d2c1ca1 dl1dtda\_ dl1h8la2 d3lgia\_ d3i77a\_ d2z9ia2



d4nsva\_ d1lcya2 d4jcna\_ d1os8a\_ d1hpga\_ d1p3ca\_ d1l1ja\_ d1qtfa\_  
d1e69a\_ d1mv5a\_ d3g60a4 g1ii8.1 d1ewqa2 d1ji0a\_ d1qhla\_ d1v43a3  
d2wmfa1 d1vpla\_ d4a82a2 g1f2t.1 d2d62a1 d3tuic1 d2bbsa1 d3g60a3  
d2ixea\_ d1g6ha\_ d1sgwa1 d2qi9c\_ d3rlfa1 d3b60a1 d3d31a2 d2pzea1  
g1xew.1 d1jj7a\_ d1oxk2 d2onka1 d1w1wa\_ d1iwea\_ d1qf5a\_ d1vmaa2  
d1nija1 d1np6a\_ d2p67a1 d3ihla\_ d1okkd2 d1ls1a2 d1slma2 d1iona\_  
d2v40a\_ d3hida\_ d2vola1 d2g0ta1 d1vcoa2 d1j8mf2 d1g3qa\_ d1xjca\_  
d1p9ba\_ d1qzxa3 d1ihua2 d1ihua1 d2qm8a\_ d1dj2a\_ d4ioja\_ d1cp2a\_  
d1yrba2 d1hyqa\_ d3gqba2 d1skye3 d1xp8a1 d1tf7a2 d1tf7a1 d1ye8a1  
d1skyb3 d2qe7d2 d4blta\_ d4huta\_ d3l1daa2 d4hyya\_ d2i3ba1 d1crla\_  
d3j9tb2 d3ntua2 d1vdza1 d2z43a\_ d1e9ra\_ d1nlfa\_ d3ziaa2 d1n0wa\_  
d1g6oa\_ d3ziad2 d3j9ta2 d1pzna2 d3gqbb2 d2i49a\_ d1nnfa\_ d1xvxa\_  
d1ursa\_ d1h3da1 d1iuda\_ d4m1va1 d1twya\_ d3e13x\_ d2nxoa1 d4pfua\_  
d3ttma\_ d1elja\_ d2qmwa1 d1us5a\_ d1y3na1 d1uqwa\_ d4f19a1 d2esna2  
d3thia\_ d3fasa1 d2uyeb\_ d2xwva1 d1r91a\_ d2fyia1 d1pb7a\_ d2ozza1  
d1sw5a\_ d1nh8a1 d1vr5a1 d2g29a\_ d1xs5a\_ d3lswa\_ d2z23a\_ d3w9va\_  
d3tcha\_ d1q35a\_ d1z7me1 d3q27a\_ d1p99a\_ d1ve4a1 d2i6ea1 d4mcoa1  
d4n8ya\_ d1eu8a\_ d1zba1 d1hsla\_ d1lixca2 d1j1na\_ d1xvya\_ d1y9ua\_  
d2z22a1 d1xoca1 d4oera\_ d1wdna\_ d5f1qa1 d1xt8a1 d1i6aa\_ d4gwoa\_  
d4igta1 d1pc3a\_ d4mmpa1 d1o63a\_ d2czla1 d2onsa2 d4mija1 d4ok5a1  
d2bmfa1 d2bmfa2 d1yksa1 d1yksa2 d2qeqa1 d2jlqa1 d1a1va2 d1eh3a\_  
d3skpa\_ d1dtza1 d1dtza2 d1ieja\_ d1jnfa2 d1ce2a1 d1jnfa1 d1b1xa2  
d1b1xa1 d1jw1a1 d1jw1a2 d1ryoa\_ d1h76a1 d1h76a2 d1etha2 d1w52x1  
d2ppla1 d1hpla2 d1lpbb2 d2oxea1 d1bu8a2 d1rp1a2 d1c4oa1 d2p6ra3  
d2p6ra4 d1oywa2 d1oywa3 d1wrba1 d1w36b2 d1w36b1 d1c4oa2 d3bora\_  
d1t6na\_ d2eyqa5 d2eyqa3 d2eyqa2 d2zu6a2 d1veca\_ d1uaaa1 d1w36d1  
d2g9na1 d1z3ix2 d2rb4a\_ d1hv8a1 d1hv8a2 d1t5ia\_ d1w36c2 d2j0sa2  
d2j0sa1 d1fuka\_ d3hjha1 d1z5za1 d1qdea\_ d1z63a1 d1s2ma2 d1s2ma1  
d1wp9a1 d1wp9a2 d1gm5a3 d3dina4 d3dina3 d1q0ua\_ d1w36c1 d1z3ix1  
d1nkta3 d1nkta4 d1uaaa2 d1w36d2 g1qhh.1 d2fwra2 d2fwra1 d3q3ma\_  
d1za0a1 d2inca\_ d1jk0a\_ d2incb\_ d1mhyb\_ d3hf1b\_ d1mtyb\_ d1r2fa\_  
d2uw1a\_ d1mhyd\_ d3n37a\_ d1afra\_ d1oquc\_ d1syya\_ d1mtyd\_ d2o1za\_  
d1uzra\_ d1smsa\_ d2fkza\_ d1zujal d1s3qa1 d2fjca1 d1z6om1 d1veia\_  
d4dyya\_ d3gvya\_ d2pyba\_ d4cy9a1 d3bvfa1 d1r03a\_ d2cf7a\_ d1nf4a\_  
d1zs3a1 d4iwka\_ d3ka8a\_ d3np0x\_ d1n1qa\_ d1lb3a\_ d4e6ka\_ d1z6oa1  
d2fzfa1 d4dyua\_ d3ge4a\_ d1jgca\_ d4am4a\_ d2z6ma\_ d1ji5a\_ d1vlga\_  
d1lkoa1 d1krqa\_ d3qz3a\_ d1o9ra\_ d2ffxj\_ d1euma\_ d1yv1a1 d2v2pa\_  
d1j30a\_ d4di0a\_ d1dpsa\_ d1oewa\_ d2qzxa\_ d2asia\_ d1psoe\_ d1miqa\_  
d1smra\_ d2h6ta\_ d1pfza\_ d1lizda\_ d3hd8a\_ d1j71a\_ d1dpja\_ d4aa9a\_  
d1t6ex\_ g1b5f.1 g1lya.1 g1htr.1 d1qdma2 d1bxoa\_ d1wkra\_ d1tzsa\_  
d1libqa\_ d2qzwa\_ d2v76a\_ d1wj1a1 d1aqca\_ d1qqga2 d1qqga1 d1ntva\_  
d1n3ha\_ d4dbba\_ d3f0wa1 d1p3ra\_ d1wgua1 d2cy4a1 d3hqca\_ d1wvha1  
d1xr0b1 d1bdqa\_ d3ggta\_ d3ixoa\_ d1mrxa\_ d2haha\_ d1tw7a\_ d4njsa\_  
d1sgua\_ d2p3da\_ d1nsoa\_ d3d3ta\_ d2rkfa\_ d1c6ya\_ d2rspa\_ d3ogpa\_

d3ekwa\_ d2o4na\_ d2j9ja\_ d1baia\_ d3ggua\_ d3lzua\_ d4npua\_ d4j55a\_  
d2r8na\_ d2fxda\_ d2p3ca\_ d4dqea\_ d3ttpa\_ d3t3ca\_ d2p3aa\_ d2hc0a\_  
d2fdda\_ d3mwsa\_ d1k8rb\_ d1wgra1 d1ef5a\_ d1wfy1 d1e8ya3 d1wgya1  
d1l1fda\_ d2cs4a1 d1wxma1 d2byea1 d3kh0a1 d2byfa1 d1wxaa1 d1e7ua3  
d1h4ra3 d4yl8a1 d2a16a3 d1wgda1 d1wga1 d4q5eb\_ d1wjna1 d1se9a\_  
d3n3kb\_ d1wz0a1 d1we6a1 d2m0xa\_ d2gbka\_ d3rt3b1 d1wh3a1 d1sifa\_  
d2ekec2 d4ii2b1 d4hk2a1 d1c3ta\_ d1wgha1 d1ttna1 d1j8ca\_ d1wx8a1  
d3v6cb1 d2ma9b\_ d4i6lb1 d1bt0a\_ d2jvca1 d1iyfa\_ d2k1fa\_ d1wxva1  
d1wf9a1 d1t0ya\_ d2io0b2 d1x1ma1 d2gbma\_ d1zw7a1 d2m17a\_ d1ud7a\_  
d1we7a1 d2l1wpa\_ d2gbja\_ d1wjua1 d1v6ea1 d1v86a1 d4eewa\_ d1wiaa1  
d4icva\_ d4gu2a\_ d1wx7a1 d1wy8a1 d4hjka1 d2faza1 d1v5oa1 d2a13a1  
d2cr5a1 d1wj4a1 d1s3sg\_ d3ubra\_ d1qo8a1 d1d4ca1 d2k3va\_ d1ft5a\_  
d1qdba\_ d1m1qa\_ d2j7aa\_ d1h21a\_ d1ogyb\_ d4fasa\_ d1jnia\_ d1sp3a\_  
d1g66a\_ d5ajha1 d4lu0a\_ d1of8a\_ d3unda1 d3e9aa1 d1vr6a2 d1n8fa\_  
d2qkfa\_ d1d9ea\_ d3h33a\_ d1rwja\_ d19hca\_ d1os6a\_ d3bxua\_ d3h4na\_  
d1i77a\_ d3caoa\_ d2ctha\_ d1duwa\_ d1ofwa\_ d2e84a\_ d1hh5a\_ d1gyoa\_  
d3h34a\_ d2bcgg1 d2bcgg2 d1d5ta1 d1wioa4 d1ccza2 d1vcaa1 d1lic1a1  
d2d9qb1 d2nxyb2 d1um8a\_ d1lixza\_ d1qvra2 d1qvra3 d1qzma\_ d1sxjc2  
d1jr3d2 d2p65a\_ d1l8qa2 d3hu3a3 d1sxjd2 d1njfa\_ d1in4a2 d1sxja2  
d1tuea1 d2ce7a2 d1w5sa2 d1sxjb2 d1d2na\_ d1ny5a2 d1ofha\_ d2gnoa2  
d2a5yb3 d1fnna2 d1u0ja1 d1lv7a\_ d1liqpa2 d2fnaa2 d1lixsb2 d4gita\_  
d1sxje2 d1g41a\_ d1svpa\_ d1mbma\_ d3su6a1 d1cula1 d4agka\_ d1q31a\_  
g1n11.1 d3e90b\_ d1ep5a\_ d3u1jb\_ d2e3fa\_ d1mm0a\_ d2e3ea\_ d2l1da\_  
d2ny8x\_ d2e3ga\_ d2ny9x\_ d2nz3a\_ d2l1j7a\_ d1n4na\_ d2m8bb1 d2kyqa\_  
d3psma\_ d1jkza\_ d1jxca\_ d2g11a\_ d1ugla\_ d4uj0a\_ d2k4ua\_ d1hp2a\_  
d2lu9a\_ d1baha\_ d2meoa1 d1wm7a\_ d1hlya\_ d1n8ma\_ d1jlza\_ d1wpda\_  
d1pvza\_ d1wt7a\_ d1rjia\_ d1wz5a\_ d1m2sa\_ d1pjva\_ d1c49a\_ d1qkya\_  
d2ktca1 d1wmta\_ d1du9a\_ d1j5ja\_ d1rlga\_ d1t0za\_ d2i61a\_ d1t1ta\_  
d1sn4a\_ d1kv0a\_ d2l1kba\_ d1npia\_ d1wvna\_ d1pe4a\_ d2kbka\_ d2li7a\_  
d1djta\_ d2kbha\_ d1dq7a\_ d1sega\_ d1omya\_ d1zywa1 d1jzaa\_ d1n9wa1  
d1bbua1 d1e1oa1 d1c0aa1 d1l0wa1 d3a74a1 d1eova1 d1iyjb4 d1iyjb5  
d1iyjb3 d1o7ia\_ d4ipca1 d1x3ea\_ d4apva\_ d1jb7a1 d1jb7a2 d1jb7a3  
d3kdfa\_ d1ue1b\_ d1wjja1 d3eiva\_ d1xjva2 d1xjva1 d2ccza2 d1se8a\_  
d1l1oc\_ d1jb7b\_ d1qvca\_ d3ulla\_ d1qzga\_ d1miua4 d1miua5 d1miua3  
d3g48a1 d1gd7a\_ d1mkha\_ d1jjcb3 d1pyba\_ d1y14b1 d2nn6i1 d1i94l\_  
d2zjra2 d1smxa\_ d2qamc2 d1hh2p1 d2r7da1 d1rl2a2 d1wfqa1 d3bzka4  
d1x6oa2 d3a0ja\_ d2j01d2 d2ja9a1 d4q15a\_ d1hr0w\_ d1luza\_ d2n3sa\_  
d2vnud1 d1h95a\_ d1go3e1 d2nn6h1 d1ne3a\_ d2mola\_ d1liz6a2 d1jjga\_  
d1e3pa2 d2ix0a3 d2ix0a2 d2lxja\_ d1ueba3 d1ueba2 d2z0sa1 d1u0la1  
d2ix0a1 d2eifa2 d2je6i1 d3i2za1 d2c35b1 d2ahob2 d1t9ha1 d3i4oa\_  
d2qall1 d1jt8a\_ d2nn6g1 d1g6pa\_ d3cama\_ d1i94q\_ d1c9oa\_ d1d7qa\_  
d2ba0a1 d2vnud2 d2vnud3 d1khia2 d2qalq1 d1wi5a1 d1xta2 d1ny4a\_  
d1dgsa2 d1ckma1 d1p16a1 d1x9na2 d1pfsa\_ d2a1ka\_ d1je5a\_ d1ohea1  
d1ohea2 d2f4da\_ d1rxda\_ d2hxpa\_ d1xria\_ d1fpza\_ d3ezza\_ d4y2ea\_

d1i9sa\_ d3azya\_ d3wvja\_ dlupsa1 dlajoa\_ d2hyka\_ dlajka\_ d2vy0a\_  
d1o4ya\_ d3o5sa\_ d3d6ea\_ d3atga\_ dl1dypa\_ dlumza\_ d3i4ia\_ d1c11a\_  
d41bqa\_ d1a78a\_ d1slta\_ d4no4a\_ d3zsja\_ d3duia\_ d1g86a\_ d1is3a\_  
d1qmja\_ d1hlca\_ d1tdha3 d1q3ba3 d1k82a3 g1qmo.1 g1len.1 d3zyra\_  
d1fnya\_ d1n47a\_ g21tn.1 d1avba\_ d3usua\_ d1dhkb\_ d1f9ka\_ d1ukga\_  
d1g8wa\_ d1g9fa\_ d1wbfa\_ d3wcsa\_ d1g7ya\_ g1loe.1 d1mvqa\_ d1hq1a\_  
d1v6ia\_ d1dbna\_ d1qnwa\_ d1fx5a\_ d4l8qa\_ d3n35a\_ d1lepwa1 d1leysc\_  
d2h0ba\_ d2erfa\_ d1h30a2 d3mw4a1 d1pz7a\_ d2r1ba\_ d3v64a1 d1d2sa\_  
d3bopa1 d3mw3a1 d1okqa1 d1okqa2 d1dszb\_ d1a6ya\_ d3cbba\_ d1ynwa1  
d1r4ia\_ d1hcqa\_ d2hana\_ d2hanb\_ d2enva1 d1kb4b\_ d1l01a\_ d1cita\_  
d1adqa1 d1fnga1 d1uvqb1 d1zs8a1 d2vola1 d2vola2 d1mfb12 d2jelh2  
d1uwe12 d3qq4b1 d1kjob\_ d1k5na1 d1osph2 d4odh12 d1ow0a1 d1ow0a2  
d1bfob2 d3l9ra2 d3jtt1 d2fath2 d4elkb2 d1fn4b2 d2xfxb\_ d1pg7x2  
d1cqka\_ d4k71b2 d1l1k2a1 d1eapb2 d4l1fhg2 d1i4fa1 d2nw2a2 d1kfah2  
d1mhca1 d1h3ua1 d1wejh2 d1h0db2 d1a5fh2 d1kcvh2 d1mjuh2 d1qqda1  
d1kcrh2 d1k8ia1 d3huja2 d2nnab1 d1nfd2 d3mffb2 d1s9va1 d1l1k3h2  
d1q0x12 d1fv1b1 d1neza1 d4rfeb2 d1r3ha1 d1a6tb2 d1kja1 d1pz5b2  
d1onqa1 d2bc4a2 d1de4a1 d1k8da1 d1tcra2 d1dn0b2 d1nfd2 d2xwtb2  
d1bfoa2 d1mexh2 d1iakb1 d1ypzf2 d4f7ea2 d1q7212 d2fbjh2 d1fe8h2  
d1clzh2 d1fngb1 d1uvqa1 d1vgka1 d1c16a1 d4j12a2 d4x99b2 d1igtb3  
d1je6a1 d1q72h2 d1nldh2 d1teth2 d2hmic2 d1ilca2 d1ilca1 d1k8ib1  
d1q0yh2 d1kfa12 d3frua1 d1pg7w2 d1u58a1 d1igyb4 d1igyb3 d1hyrc1  
d1klub1 d1deeb2 d1c12b2 d2bc4b2 d1kcv12 d3wn5b1 d1l1k2b\_ d1l1k312  
d1mjul2 d1sm3h2 d1q0xh2 d1zvsa1 d1ydp1 d1u8ib2 d1ypze2 d1kcuh2  
d1op9a\_ d1y01a1 d1letzb1 d1egj11 d2gsib1 d1nj9a1 d4jfh1 d1aqk11  
d1t2ja\_ d1l04h1 d1zvy1 d3v4v11 d4enec1 d1kxtb\_ d5e8ea1 d2pxya\_  
d4weud\_ d1xiwc\_ d2esvd1 d1qnzh\_ d1ogae1 d1f4xh1 d4n1hb\_ d3ezjb1  
d3mlw11 d1kfah1 d1letza1 d1b4jh1 d3cfic\_ d4w68a\_ d2arja1 d1ek3a\_  
d2ok011 d1vera\_ d1uwgh1 d1blnb1 d1fpth1 d1rzga1 d2giya1 d4m3kb1  
d1nc2a1 d2nyyd1 d1ncna\_ d1fbih1 d5dxwa\_ d4fqqa1 d1dqdh1 d1jfq11  
d1kelh1 d1faih1 d1frgl1 d1figl1 d4m6n11 d1fo0a\_ d4hxb11 d3b5ga\_  
d3quyd1 d2h9gb1 d1i8kb\_ d2dd8h1 d2ck0h1 d1eaja\_ d4w6wb1 d2a6ib3  
d1t66d1 d2e27h\_ d1ob1b1 d1f11b1 d2v7na1 d1ad0a1 d2xt1b1 d1pskh1  
d4i13b1 d2op411 d1a0q11 d1uwe11 d1za3a1 d1ncb11 d4uu9a\_ d1bm3h1  
d1cloh1 d1nqba2 d1cf8h1 d4y5va\_ d1mhph1 d5anma1 d4cdgc1 d4ldeb\_  
d1y01b1 d2pcpb1 d1z3gl1 d1dfb11 d1fh5h1 d3g5xa1 d1tzib1 d4dn311  
d3zhka1 d2b1hh1 d2uyl1 d1f3dh1 d1nj9b1 d2agjh1 d2h1p11 d1q72h1  
d8fabbb1 d1ndmb1 d1rjca1 d4u6hb1 d3upca\_ d2fbj11 d1osph1 d1tvda\_  
d2cjh\_ d4fhbd1 d1bd2d1 d1rz7h1 d3nn8a\_ d1blna1 d1knoa1 d1nfda1  
d2bmkb1 d1dq11\_ d1igyb1 d1igf11 d12e8h1 d3utza1 d1nc2b1 d1rihh1  
d4mwfb1 d4jvpa1 d1mieh1 d1rhfa1 d1fgn11 d1sbsh1 d1lp9e1 d1dn0a1  
d4lqf11 d1iaih1 d1kgcd1 d1mh5b1 d1gpol1 d2g60h3 d1f8t11 d2jixd1  
d4grwh\_ d1fo0b\_ d1bfob1 d1axsa1 d1u9ka\_ d1nmbh\_ d1h8na1 d1h8na2  
d1jguh1 d4eura1 d3sdy11 d35c8h1 d1w7211 d1mvub\_ d1i9rh1 d1ob1a1

d4wenb\_ d1yeeh1 d3ietc1 d1f58h1 d1ad0b1 d1mqk1\_ d1nbvh1 d4b50a\_  
d3r8bb\_ d1baf11 d1mamh1 d4rgne1 d2gsgb\_ d35c811 d1bafh1 d1ailh1  
d2pcpa1 d2fath1 d2x1pa\_ d1orsb1 d1libg11 d1shma\_ d1a2yb\_ d1u0qa\_  
d2coqa\_ d1hilb1 d1qfwi\_ d1jv5b\_ d1fn4b1 d5e0qa\_ d1nsnh1 d1plg11  
d4ocxl1 d1kb5h1 d1rzfh1 d1pg7x1 d2fx7h1 d2oi9c\_ d1l7il1 d3eyva1  
d1d5il1 d4ffyl\_ d1tet11 d1a6wh\_ d1ac6a\_ d3dvfa\_ d1nfde1 d1mimh1  
d1ri8a1 d1jhlh\_ d3dura\_ d1fskb1 d1f97a1 d3so3b1 d2ak4d1 d1lp9f1  
d4z7wf1 d1l7th1 d4y5ya\_ d4x7ec1 d1emth1 d1ikfl1 d1nlbh1 d4utal1  
d1bjma1 d1eapb1 d1u6ah1 d2dtgd1 d1kj2b\_ d1xeda1 d1cleh1 d1fgvh\_  
d2bnub1 d2fb4h1 d2dtgb1 d1ktrh\_ d1jpth1 d1qkz11 d4hepg\_ d2atpb1  
d1flrh1 d2hrpl1 d1mvfa\_ d1iaim1 d3k80a1 d2jb5h1 d3zkxc\_ d4grwe\_  
d1it9h1 d1rhhb1 d3w9ec\_ d1e4wh1 d1sy6h1 d2j6eh1 d3qxta\_ d1jglh1  
d1p7ka1 d1tzhb1 d4n8pa1 d1gaf11 d2jelh1 d1wioa2 d4i0cc1 d1cicb1  
d1lmka2 d1lmka1 d1iqwh1 d1lorqb1 d1ejoh1 d1jnlh1 d4zg1a\_ d43c9b\_  
d1ggb11 d1wejh1 d3q6fa1 d1f3dj1 d3c6la1 d1bqlh1 d3p9wb\_ d1a3r11  
d1h0db1 d2uzil\_ d1eo811 d1qfwl\_ d1n7ml1 d1igja1 d1c5ch1 d2a9mh\_  
d1rmfh1 d1fj1b1 d4heme\_ d1ccza1 d1a5fh1 d1ogad1 d1dlfh\_ d1qa9b\_  
d1vge11 d3qskb\_ d1sjxa\_ d4ozfg1 d1sq2n\_ d1qd0a\_ d1kcvh1 d1c5db1  
d3qcul1 d3bn9d1 d1mjuh1 d4y8dc\_ d7fabh1 d3dvgb1 d1l0011 d1a6tb1  
d1gigh1 d1kcrh1 d2hwz11 d1yjdc1 d3clf11 d4krna\_ d1d171\_ d1e6o11  
d1mexh1 d3r0ma\_ d4kkna\_ d1fns11 d1oaqh\_ d1rzia1 d1lucbh1 d1ncw11  
d4b41a\_ d1nfdfl d2mpah1 d2d7t11 d4grwf\_ d4b5ea\_ d1lk3h1 d3u79a\_  
d4u3xa\_ d1ghfl1 d1bvkb\_ d1mcww1 d1b88a\_ d1jrhh1 d32c2b1 d4wemb\_  
d1dsfh\_ d1op3h1 d1ce111 d1iqda1 d1qoka1 d1qoka2 d1qfuh1 d2crya1  
d1ay1h1 d1oaql\_ d3ab0b\_ d1rurl1 d1t4kb1 d1bz7b1 d1n0xh1 d1for11  
d1lucb11 d4w6yb\_ d43c9a\_ d2aab11 d1tzia1 d4nlca\_ d1k6qh1 d3g9ab\_  
d4tvsa1 d1ligmh\_ d1pz5b1 d3dx9a1 d3wxwh\_ d1nakh1 d1kcul1 d3eaka\_  
d4qlra1 d1cr911 d1d9ka\_ d1f4x11 d1deea1 d2i27n2 d1c12a1 d2orb11  
d1j8hd1 d1mcph1 d1c5da1 d1kenh1 d1bd2e1 d1h5ba\_ d4x7fc1 d3upaa\_  
d1t3fa1 d1indh1 d2dtgc1 d4hc111 d1zv5a1 d4wgvb\_ d1uwgl1 d4f37k1  
d1aqkh1 d1vesa\_ d3zkqd\_ d1fpt11 d1l0411 d1knob1 d3rrqa\_ d1ct8b1  
d4orz\_ d1mlbb1 d4hgkc1 d1dqdl1 d1bogb1 d4ozhe1 d1dr9a1 d1i7za1  
d1dn0b1 d1kell1 d1rzi1 d1ypzf1 d1wtla\_ d1hkfa\_ d1fail1 d1figh1  
d2vyre\_ d1sjva\_ d1ohqa\_ d1bfoa1 d1pkqb1 d1mjul1 d1b4j11 d1nsn11  
d2arj1 d1p4bh\_ d4aj0a\_ d3nn8b\_ d2rcja1 d1f2xk\_ d4v1dd\_ d1adqh1  
d2eksa\_ d4k3ga\_ d1jfqh1 d1uweh1 d1frgh1 d4gftb\_ d1uz8b1 d4nlea\_  
d1bm311 d1cl011 d3mcka1 d2vq1a1 d1ae6h1 d4aq1b1 d1uj3b1 d1nbqa1  
d1fh511 d2ck011 d2ywza\_ d1q7211 d4nxbx\_ d1hila1 d4hzb1 d2j8811  
d1zmya1 d1cd0a\_ d1a4ka1 d1psk11 d1a0qh1 d4krmb\_ d1ncbh1 d2fbjh1  
d1j8he1 d1i3ua\_ d1cf811 d1fe8h1 d2p1ya1 d1eeqa\_ d2x89a\_ d1o10a\_  
d2r0lh1 d1ub5a1 d1dfbh1 d3eyvb1 d4jdvb1 d4p2cg\_ d2gsia1 d2agj11  
d1u3ha1 d2h1ph1 d1rih11 d1fskc1 d1boga1 d2a7711 d1ospl1 d1qfoa\_  
d3dwta\_ d2fx711 d1rz711 d3stba1 d1pkqa1 d1b6da1 d1dzba2 d1dzba1  
d1kj2a\_ d4l1ha\_ d1rzgb1 d1dq1h\_ d12e811 d1miel1 d1jmaa\_ d1sbs11

d1fgnh1 d1f5811 d1mqkh\_ d1ndgb1 d3qeg11 d1iaii1 d2aw2a1 d1tqbc1  
d3fo2a1 d4dkaa\_ d1f8th1 d2g6011 d2ywy\_ dluj3a1 d1yc7a\_ d3bd3a\_  
d4w6xb1 d1nmb1\_ d1i8ka\_ d1rjlb1 d1ypze1 d1p7kb1 d1kxqe\_ d1gpoh1  
d2z4qa1 d1w72h1 d1i9r11 d4qgya1 d4xt1c\_ d2qqnh1 d1cica1 d3c08h1  
d2cd0a\_ d2bdnh1 d1hnga1 d1mam11 d1nldh1 d1cr9h1 d4lcih1 d3bkyh1  
d3qg7l1 d1ai111 d1kxvc\_ d4iosd\_ d1l7ih1 d2x1qa\_ d1ub6b1 d3k74b\_  
d1ibgh1 d1teth1 d1igya1 d1hxma1 d2x6ma\_ d2e71a\_ d5e03a\_ d1qfwm\_  
d2r0kh1 d1igjb1 d1rurh1 d1plgh1 d1mj8h1 d1yuhb1 d3fmg11 d1rzfl1  
d1emt11 d1ad9b1 d1igtb1 d1nlb11 d1d5ih1 d3k7ua\_ d4ffyh\_ d1bwwa\_  
d3dvg11 d1a6ta1 d1fgvl\_ d4qxgl1 d1mim11 d1jh11\_ d2hffb1 d2hh011  
d1qkzh1 d1l7t11 d1afvh1 d1iaii1 d2cjuh\_ d1um5h1 d2ghwb2 d2ghwb1  
d1kgce1 d2fgwh1 d1ikfh1 d1dvfd\_ d2i24n1 d2xtjb\_ d1za3b1 d2yc1a\_  
d2hh0h1 d2x1oa\_ d1bvka\_ d1rjla1 d5e7ba1 d1igta1 d1i11b1 d2fb411  
d1mvua\_ d1jpt11 d32c2a1 d1fvca\_ d1iqdb1 d2hrph1 d2p4ab\_ d4qo1a\_  
d1p2cb1 d1wt5c\_ d1t4ka1 d5c1mb\_ d1it911 d1bz7a1 d1b2wh1 d1e4w11  
d1jnl11 d1yedb1 d1za6b1 d3u7aa\_ d1igfh1 d3gnml1 d1orsa1 d1wejl1  
d1a2ya\_ d1hxmb1 d1gafh1 d2j4wh1 d1pz5a1 d1j05a\_ d1a3rh1 d4fq111  
d1qfwh\_ d1eo8h1 d1n7mh1 d4s11a\_ d1kegh1 d5da4a\_ d1iqw11 d3whxb1  
d1vgeh1 d1deeb1 d1c12b1 d1t2q11 d1ad9a1 d3gsnb1 d3b2uc1 d1ggbh1  
d1t3fb1 d1nak11 d4ocmc\_ d1lila1 d2v7hb3 d2esve1 d1mcoh1 d2qr0b1  
d2q3aa\_ d1ct8a1 d1kcr11 d2pxyb\_ d2uzih\_ d5c3ld\_ d3durb\_ d1c5c11  
d2ak4e1 d1d17h\_ d1xiwd\_ d1mlba1 d1rmf11 d1i7zb1 d1dlf1\_ d2xa3a\_  
d5bq7b1 d1dqqb1 d3h4211 d1egjh1 d1kcv11 d1fe811 d2j6e11 d1f3rb2  
d11k311 d1sm3h1 d1q0xh1 d1ghfh1 d7fab11 d1igch1 d1lo0h1 d4idla\_  
d5c2b1\_ d1jrh11 d1i11a1 d3zhda1 d4kfzc\_ d1b0wa\_ d1e6oh1 d1mex11  
d4krpb\_ d1fnsh1 d1ncwh1 d4hgma\_ d4eigb1 d4rzca\_ d2mpa11 d4y5xa\_  
d5en2b1 d3lrga1 d4ej1c1 d1rhha1 d1j05b\_ d1forh1 d1q9wb1 d2wzpd\_  
d2aq2a1 d1h0da1 d3revb1 d2ij0c1 d1tzha1 d4m7j11 d1k6q11 d3b9kc1  
d1igml\_ d3qeua1 d1dsfl\_ d1celh1 d1kcu11 d1zvha1 d1zvoa1 d1tqbb1  
d1ay111 d2qscl1 d2cgrh1 d1n10h1 d1ken11 d3eo0a1 d4n9ob1 d1n0xl1  
d3k1kc\_ d2cqva1 d1fhga\_ d2k1ma\_ d2d12a1 d1biha3 d1biha1 d1biha4  
d3qp3a1 d1glca\_ d1gxea\_ d1cvsc2 d1cvsc1 d1xmwa2 d1m4ka2 d2otpa2  
d1biha2 d1rhfa2 d2fcba2 d2fcba1 d1wwbx\_ d1gsma2 d1lepfa1 d1lepfa2  
d2dava1 d1waaa\_ d1f97a2 d1x44a1 d1vcaa2 d1fnla2 d1fnla1 d3b5ha2  
d3h8na2 d3h8na1 d1jbja1 d1jbja2 d1pd6a\_ d1f2qa2 d1f2qa1 d3cx2a\_  
d1nbqa2 d3b5ha1 d1n26a1 d1xiwb\_ d1xaua\_ d1fltx\_ d2ifga1 d1olla1  
d1olla2 d1cs6a4 d1cs6a3 d1cs6a2 d1cs6a1 d2gw5a2 d1sy6a1 d1xiwa\_  
d1ucta2 d1ucta1 d1ry7b2 d1qz1a3 d1olza1 d2c9aa1 d1wwca\_ d2aq2b1  
d1ck1a1 d1enfa1 d1i4pa1 d1vloa1 d1et9a1 d1esfa1 d2g9hd1 d4ohja1  
d1klud1 d1bxta1 d1eu3a1 d1ty0a1 d1fnua1 d1c4qa\_ d1prtc1 d2wv6d\_  
d1ltrd\_ d4l63b1 d1r4pb\_ d1prtd\_ d1tl0f\_ d2bosa\_ d1prtb1 d3chbd\_

**Family-7 (a.25.1.1)**

**Positive dataset contains 30 protein sequences.**

d2fkza\_ d1zuj11 d1s3qa1 d2fjca1 d1z6om1 d1veia\_ d4dyya\_ d3gvya\_

d2pyba\_ d4cy9a1 d3bvfa1 d1r03a\_ d2cf7a\_ d1zs3a1 d4iwka\_ d3ka8a\_  
d3np0x\_ d4e6ka\_ d1z6oa1 d2fzfa1 d4dyua\_ d3ge4a\_ d4am4a\_ d2z6ma\_  
d1vlga\_ d3qz3a\_ d2ffxj\_ d1yv1a1 d2v2pa\_ d4di0a\_

**Negative dataset contains 4071 protein sequences.**

d1m32a\_ d1libja\_ d1c7na\_ d4q75a\_ d2bkwa1 d1t3ia\_ d1n8pa\_ d1qz9a\_  
d1jf9a\_ d1eg5a\_ d1p3wa\_ d3kgwa\_ d1c11a\_ d2ctza1 d1vjoa\_ d2rfva\_  
d1gc0a\_ d1cs1a\_ d1d2fa\_ d2ch1a1 d1qgna\_ d1pffa\_ d1elua\_ d1u08a\_  
d11c5a\_ d1b5pa\_ d2ay1a\_ d1bw0a\_ d3pd6a\_ d7aata\_ d2csta\_ d1j32a\_  
d1fg7a\_ d4wlha\_ d1o4sa\_ d1v2da\_ d1gdea\_ d1m6sa\_ d1v72a1 d1svva\_  
d1ajsa\_ d1wsta1 d2f8ja2 d11k9a\_ d1vp4a1 d1xi9a1 d2gb3a1 d1xkla\_  
d2wfla\_ d3i2ka1 d11nsa3 d1mpxa2 d2cfba1 d1dfoa\_ d1o69a\_ d1bj4a\_  
d3k28a\_ d2bwpa\_ d3lg0a\_ d2fnua\_ d3ou5a\_ d1z7da1 d1b9ha\_ d1iaya\_  
d4msoa\_ d1bs0a\_ d1s0aa\_ d1sffa\_ d3tqxa\_ d1mdoa\_ d3qboa\_ d3pgya\_  
d1bjna\_ d2dkja\_ d1ejia\_ d1vefa1 d4wxga\_ d3bs8a\_ d3gbxa1 d1w23a\_  
d1ohfc\_ d1sefa\_ d1sfna\_ d1sq4a\_ d2tbvc\_ d1c8nc\_ d1x36a\_ d1ng0c\_  
d4sbvc\_ d1lopa\_ d1f2nc\_ d3lgia\_ d3i77a\_ d2z9ia2 d4nsva\_ d1lcy2  
d4jcna\_ d1agja\_ d1os8a\_ d1hpga\_ d1p3ca\_ d111ja\_ d1qtfa\_ d1ddla\_  
d1e57b\_ d1auyb\_ d1qnia1 d1fwxa1 d1js9c\_ d1f15b\_ d1za7a\_ d11aja\_  
d3ehbb1 d1fftb1 d1gyca3 d1hfua2 d1kbva1 d1kbva2 d1sdda1 d1sdda2  
d1gyca1 d1gyca2 d1mzya1 d2bw4a1 d1aoza1 d1aoza2 d1kyaa2 d1kyaa3  
d1kyaa1 d1mzya2 d4e9sa1 d1sddb1 d1sddb2 d1hfua1 d1hfua3 d1oe1a2  
d1oe1a1 d1v10a2 d1v10a3 d1v10a1 g1f8v.1 d1novc\_ d2bbvc\_ glor0.1  
g1cp9.1 g1e3a.1 d1a3qa1 d1liknc\_ d3brda1 d1oy3c\_ d1imhc1 d1gjia1  
d1zk9a1 d2cxka1 d2bema\_ d1pama1 d1ea9c1 d1qhoa1 d2fhfa2 d2fhfa1  
d1k3ia1 d1j0ha1 d1cxa1 d2bhua1 d1edqa1 d1f1sa2 d1ut9a2 d1gvia1  
d1txka1 d1adqa1 d1fnga1 d1uvqb1 d1zs8a1 d2vola1 d2vola2 d1mfb12  
d2jelh2 d1uwel2 d3qq4b1 d1kjbv\_ d1k5na1 d1osph2 d4odh12 d1ow0a1  
d1ow0a2 d1bfob2 d3l9ra2 d3jtth1 d2fath2 d4elkb2 d1fn4b2 d2xfxb\_  
d1pg7x2 d1cqka\_ d4k71b2 d11k2a1 d1eapb2 d4lfhg2 d1i4fa1 d2nw2a2  
d1kfah2 d1mhca1 d1h3ua1 d1wejh2 d1h0db2 d1a5fh2 d1kcvh2 d1mjuh2  
d1qqda1 d1kcrh2 d1k8ia1 d3huja2 d2nnab1 d1nfd2 d3mffb2 d1s9va1  
d11k3h2 d1q0x12 d1fv1b1 d1neza1 d4rfeb2 d1r3ha1 d1a6tb2 d1kjva1  
d1pz5b2 d1onqa1 d2bc4a2 d1de4a1 d1k8da1 d1tcra2 d1dn0b2 d1nfde2  
d2xwtb2 d1bfoa2 d1mexh2 d1iakb1 d1ypzf2 d4f7ea2 d1q7212 d2fbjh2  
d1fe8h2 d1clzh2 d1fngb1 d1uvqa1 d1vgka1 d1c16a1 d4j12a2 d4x99b2  
d1igtb3 d1je6a1 d1q72h2 d1nldh2 d1teth2 d2hmic2 d1ilca2 d1ilca1  
d1k8ib1 d1q0yh2 d1kfa12 d3frua1 d1pg7w2 d1u58a1 d1igyb4 d1igyb3  
d1hyrc1 d1klub1 d1deeb2 d1c12b2 d2bc4b2 d2ig2h2 d1kcv12 d3wn5b1  
d11k2b\_ d11k312 d1mjul2 d1sm3h2 d1q0xh2 d1zvsa1 d1ydp1 d1u8ib2  
d1ypze2 d1kcu2 d2phla2 d2ph1a1 d1fxza2 d1fxza1 d1lra\_ d1uija1  
g1dgw.1 d2v09a\_ d1uika2 d1uika1 d1dgwa\_ d1ep0a\_ d2pa7a1 d1wlta1  
d1nxma\_ d2c0za1 d1ds6b\_ d1fstb\_ d1ex0a1 d1g0da1 d1ju8a\_ d1tafa\_  
d1bh9b\_ d1tafb\_ d1q9ca\_ d1h3ob\_ d2byka1 d1n1ja\_ d4g92b\_ d1bh9a\_  
d1jfia\_ d1h3oa\_ d2bykb1 d1n1jb\_ d1eixa\_ d3exra\_ d2ffca1 d2fda1

d3n3ma1 d2czda\_ d1q6oa\_ d2yyua\_ d1vqta1 d1dbta\_ d3ldva1 d1k9ua\_  
d2opoa\_ d1r0ka3 d1j5pa3 d1vkoa2 d1vm6a2 d3qvsa2 d1p1ja2 d3gpdg2  
d2q49a2 d1hdgo2 d2g17a2 d2cvoa2 d2czca1 d3pwka2 d1lobfo2 d1i32a2  
d1zyao2 d2pkqo2 d1b7go2 d2hjsa2 d1cf2o2 d1vkna2 d1nvm2 d1ux8a\_  
d1dlya\_ d4i0va\_ d2bkma\_ d1dlwa\_ d2bmma\_ d2msya\_ d2djoa1 d2r5za\_  
d1au7a1 d1f43a\_ d21mda1 d1akhb\_ d1s7ea1 d3nara\_ d1zq3p1 d2craa1  
d1mija\_ d4uuta\_ d3a01a\_ d1x58a1 d3rkqa1 d3cmya1 d2cqxa1 d2da6a1  
d1e3oc1 d1fjla\_ d1mh3a1 d1ig7a\_ d1x41a1 d1wh7a1 d1gt0c1 d2mw8a\_  
d1lfup\_ d1x2ma1 d1b72a\_ d1wi3a1 d1jgga\_ d1wjha1 d1x2na1 d1mnmc\_  
d2cuea1 d3k2aa\_ d2hosa\_ d2jwta2 d1pufa\_ d1oact1 d2hi3a\_ d1b8ia\_  
d4j19a\_ d3lnqa\_ d1wh5a1 d1b8ib\_ d1fexa\_ d2cqra1 d1guua\_ d1ug2a1  
d2cqqa1 d2ajea1 d4a69c\_ d2crga1 d2iw5b1 d1xc5a1 d1ofcx1 d2cu7a1  
d1wgxa1 d2cjja1 d2ckxa1 d1gvda\_ d6paxa1 d6paxa2 d1k78a2 d1hlva1  
d1hlva2 d1iufa1 d2iu5a1 d1zk8a1 d2g7sa1 d2fd5a1 d2np5a1 d1z0xa1  
d2id6a1 d2d6ya1 d2i10a1 d1vi0a1 d2oi8a1 d3c07a1 d2ns7a1 d2fq4a1  
d2yvea1 d1t33a1 d2o7ta1 d1rkta1 d2np3b1 d2g7ga1 d2gena1 d2fbqa1  
d2g7la1 d2gfna1 d2g3ba1 d2jj7a1 d2hyja1 d1sgma1 d1ui5a1 d2hkua1  
d2id3a1 d4jyka1 d1b10a2 d1d5ya1 d1d5ya2 d1prtc2 d3lv8a\_ d1s3ga1  
d1zaka1 d1s4qa\_ d3tvta2 d1uf9a\_ d1khta\_ d1ckea\_ d1osna\_ d1p5zb\_  
d4tmka\_ d3cm0a\_ d1tmka\_ d1jaga\_ d3h86a\_ d1t0hb\_ d1nn5a\_ d2h92a\_  
d3kb2a1 d2c95a1 d1yj5a2 d1kgda\_ d1ly1a\_ d2ak3a1 d1vyva2 d1deka\_  
d2grja1 d1p3ja1 d1y63a\_ d1e4ya1 d1s96a\_ d3iija1 d1lvga\_ d1nksa\_  
d1vyua2 d4e22a\_ d1qf9a\_ d1jjva\_ d1q3ta\_ d1ki9a\_ d1lw7a2 d1teva\_  
d1kjwa2 d1gsia\_ d2iyva2 d1kaga\_ d1viaa\_ d1g3ma\_ d1j99a\_ d1t8ta1  
d1nsta\_ d1fmja\_ d1zrha\_ d1ls6a\_ d2a3ra\_ d1aqua\_ d2zptx\_ d3ckla\_  
d1texas\_ d1q44a\_ d2gwha\_ d1z0ja1 d3umra2 d3gj0a1 d2gaoa1 d1yzga1  
d1x3sa1 d1g7sa4 d1puja\_ d1udxa2 d1kk1a3 d2o52a\_ d1jwyb\_ d1zcaa2  
d1zcba2 d2fv8a1 d2cjwa\_ d3dz8a1 d1xzpa2 d1vg8a\_ d4qxaa\_ d2ew1a1  
d1x1ra1 d2bcgy\_ d3doea1 d3cona\_ d3rega\_ d3wyga\_ d1upta\_ d2b6ha1  
d1zd9a1 d1lnza2 d1r5ba3 d1n0ua2 d1r2qa\_ d2f91a1 d2rhda\_ d3q3jb\_  
d3q85a\_ d1efma1 d1r8qa\_ d2gf9a1 d2akab1 d1ek0a\_ d1z08a1 d2gcoa1  
d2dyla2 d4g01b\_ d2cxxa1 d1svia\_ d3q72a\_ d1ni3a1 d4ac9a4 d2erxa1  
d2bmea\_ d1wxqa1 d2gf0a1 d4ldja1 d1zunb3 d1d5ca\_ d4lv5b\_ d1efca3  
d1kmqa\_ d2g6ba1 d3lrpa\_ d1tada2 d2y8ea\_ d4rd4a1 d1z06a1 d2heia\_  
d3a58b\_ d1u01a2 d1d2ea3 d1zj6a1 d2ocba\_ d3rwoa\_ d1mr3f\_ d2e9sa1  
d4u5xa1 d2iwra\_ d2fn4a1 d3bwdd\_ d2nzja1 d2atva1 d2ksqa\_ d3l43a\_  
d1mkya2 d1mkya1 d1wmsa\_ d1jnja3 d2rmka\_ d1f6ba\_ d1f60a3 d1gota2  
d1jala1 d2fh5b1 d1g16a\_ d2wblc\_ d1m7ba\_ d1wf3a1 d1f5na2 d1t9ha2  
d1z6xa1 d1z0aa1 d2fg5a1 d2a5ja1 d2bcjq2 d1s0ua3 d1ky3a\_ d4y0va\_  
d4lhwa\_ d2qmea1 d2atxa1 d1legaa1 d1ryha\_ d1moza\_ d1nrjb\_ d2erya1  
d3bfka\_ d1puia\_ d1fzqa\_ d3j3az1 d3t5ga\_ d1shza2 d3defa\_ d2f7sa1  
d3raba\_ d3tsoa\_ d3aq4a\_ d2a17a1 d3sfva1 d3bc1a\_ d2ncda\_ d1sdma\_  
d3h4sa1 d2heha\_ d2grya\_ g3kin.1 d1kk8a2 d1br2a2 d1goja\_ d1f9va\_  
d2mysa2 d3t0qa\_ d4db1a1 d3gbja\_ d1ry6a\_ d1v8ka\_ d1vava\_ d1luaia\_

d1k8ka2 d1k8ka1 d3uleb1 d3i33a2 d3i33a1 d1dkgd2 d1dkgd1 d4ci6a2  
d1jcfa1 d4a2ba2 d2fxua1 d1yaga2 d1yaga1 d4cbua2 d1bupa2 d3vrda1  
d3vrda2 d1fcdc2 d1fcdc1 d1h1oa2 d1m70a2 d1m70a1 d1iqca2 d1iqca1  
d1eb7a2 d1nmla2 d1nmla1 d1hroa\_ d4gedb\_ d3zooa\_ d1mz4a\_ d1gu2a\_  
d1f1fa\_ d1dvva\_ d1c6ra\_ d1c75a\_ d1e29a\_ d1gdva\_ d1cnoa\_ d1h32b\_  
d1co6a\_ d2bh4x\_ d2aiua\_ d5cytr\_ d1jdl\_ d1i8oa\_ d2zboa\_ d3dmia\_  
d1ls9a\_ d1wvec\_ d2yk3a\_ d3ph2b\_ d1dw0a\_ d5aura\_ d1ql3a\_ d1qn2a\_  
d1f1ca\_ d2nqya\_ d1h4ga\_ d1hixa\_ d1oa2a\_ d1olra\_ d3b7ma\_ d4h7ma1  
d3wp3a\_ d2vgda\_ d1ligoa\_ d3zsea\_ d2nlra\_ d3wx5a\_ d1oa3a\_ d1pvxa\_  
d1f5ja\_ d1oa4a\_ d1ks5a\_ d4ixla1 d2a6za1 d3a4ua\_ d2a6va1 d3sita1  
d2ah2a1 d1n1ta1 d1evsa\_ d1cnt1\_ d1pvhb\_ d1z7ca\_ d1huwa\_ d1bgea\_  
d1rhga\_ d1f6fa\_ d1f45b\_ d1ilrb\_ d1axia\_ d1etea\_ d3tgxb\_ d1scfa\_  
d2z3qa1 d3qb1a\_ d1hula\_ d1m48a\_ d4nkqb\_ d1eera\_ d1v7mv\_ d5e4ea\_  
d2o27a\_ d3b5ka\_ d2psma1 d4zf7a\_ d3uf5a\_ d1v8fa\_ d2ejca\_ d3muea1  
d1ihoa\_ d3q12a1 d3rbaa\_ d2qtra\_ d1nupa\_ d3l92a\_ d1f9aa\_ d1qjca\_  
d2h29a\_ d1vlha\_ d1od6a\_ d1lw7a1 d1mrza2 d4ruka\_ d3wdpp1 d3wq5a\_  
d1gnxa\_ d4gxpa\_ d4hz8a\_ d1e4mm\_ d3aiua\_ d1wcca1 d3ahxa\_ d1v02a\_  
d2dgaa\_ d1pbga\_ d1vffa1 d1qoxa\_ d4ha4a\_ d2el7a\_ d1iq0a2 d1irxa2  
d1r6ta2 d1ivsa4 d2cyba\_ d1rqga2 d1j09a2 d2yxna\_ d1f7ua2 d1h3fa1  
d1ffya3 d2g36a1 d1nzja\_ d1jila\_ d1n3la\_ d1i6la\_ d1pfva2 d1h3na3  
d3n9ia\_ d3sz3a1 d3sw2a\_ d1moxc\_ d1dx5i3 d1edmb\_ d1autl2 d1autl1  
d1nqlb\_ d1dva11 d1szba2 d1kigl\_ d2y5f1\_ d1ijqa2 d1gk5a\_ d1g1sa2  
d1nt0a3 d1xdtr\_ d1lmja2 d1lmja1 d1nzia2 d2wphe\_ d1klil\_ d1pfxl2  
d1pfxl1 d1p9ja\_ d1g1ta2 d1f7ea\_ d4yzub\_ d1nuba2 d1m1xb4 d1f56a\_  
d1bypa\_ d1lazca\_ d1ws8a\_ d3u25a\_ d1cuoa\_ d1id2a\_ d1rkra\_ d2iaac\_  
d4dplx\_ d1nwpa\_ d2gima\_ d2i7sa\_ d1qhqa\_ d2y5ia\_ d1qlsa\_ d1psra\_  
d3n22a\_ d2egda\_ d4ggfc\_ d2wcea\_ d2luca\_ d4aqia\_ d3nsia\_ d2lp3a\_  
d1j55a\_ d1a4pa\_ d1k8ua\_ d1nsha\_ d1pvaa\_ d3fs7a\_ d2pvba\_ d1ttxa\_  
d1rwya\_ d2kyfa\_ d1rk9a\_ d1exra\_ d1tiza1 d1nyaa\_ d1g8ia\_ d1ggwa\_  
d1wdcc\_ d3fwba\_ d1ggza\_ d2o5ga\_ d1ctaa\_ d1m45a\_ d3i5gc\_ d1sl8a\_  
d1fpwa\_ d2scpa\_ d2roaa\_ d4aqra\_ d3pn7b\_ d1br1b\_ d1s6ca\_ d1bjfa\_  
d2obha\_ d1jfka\_ d1jf0a\_ d1qv0a\_ d1lkja\_ d2mlfc\_ d2m97a\_ d2d8na\_  
d4by5a\_ d1jbaa\_ d4nqga\_ d1wdcb\_ d2mysc\_ d1j7qa\_ d1s6ia\_ d1uhka2  
d1r2ua\_ d1dtla\_ d3kf9a\_ d3pn7c\_ d5d67d\_ d1tuza\_ d1h8ba\_ d1leg3a1  
d1eg3a2 d2zkmx1 d1snla\_ d1gjya\_ d1y1xa\_ d1hqva\_ d1dvia\_ d1df0a1  
d1qxp2 d4usla\_ d1k94a\_ d3h33a\_ d1rwja\_ d19hca\_ d1os6a\_ d3bxua\_  
d3h4na\_ d1i77a\_ d3caoa\_ d1j0pa\_ d2ctha\_ d1duwa\_ d1ofwa\_ d2e84a\_  
d1hh5a\_ d3h34a\_ d1wkya2 d1uuqa\_ d3wh9a\_ d4m1ra\_ d1xyza\_ d4xuya\_  
d2je8a5 d4bf7a1 d3cuia\_ d1ur4a\_ d1qw9a2 d1odza\_ d2vzsa5 d1bqca\_  
d2x2ya1 d1hjqa\_ d1qnra\_ d4y7ea1 d1vjza\_ d4k68a\_ d2v3ga\_ d4hpga\_  
d1nofa2 d1nq6a\_ d1h4pa\_ d1aq0a\_ d3ziza\_ d4bs0a\_ d1lecea\_ d1h1na\_  
d1ta3b\_ d1w91a2 d1ilwa\_ d1uhva2 d1us3a2 d1legza\_ d1tvna1 d3nyda1  
d1ghsa\_ d2cyga1 d4xv0a\_ d2c8na2 d1w32a\_ d3emca\_ d1v6ya1 d1foba\_  
d2uwfa1 d2fgla\_ d3niya1 d2c0ha1 d1rh9a1 d1yq2a5 d1szna2 d1fa2a\_



d1pama4 d5do8a1 d1ea9c3 d1hx0a2 d2fhfa5 d1qhoa4 d1avaa2 d1m53a2  
d4m8ua1 d2gjpa2 d1lwaha2 d4howa1 d1ktba2 d1j0ha3 d3vm5a1 d2xlia\_  
d1wzaa2 d1uasa2 d2diea1 d1mxga2 d1ht6a2 d1eswa\_ d1iv8a2 d5cpsa\_  
d1ud2a2 d1zjaa1 d3gbea1 d1kwga2 d1wdpa\_ d1gcya2 d1g5aa2 d1hvxa2  
d3dhpaa2 d2bhua3 d4do4a1 d3qgva1 d1e43a2 d1g94a2 d2d3na2 d1gjwa2  
d1gvia3 d1x1na1 d1r7aa2 d1tz7a1 d4toqa\_ d1wb0a1 d1w9pa1 d1eoka\_  
d1itxa1 d1kfwa1 d1goia2 d1edqa2 d2gsja\_ d1hjxa1 d1jnda1 d1vf8a1  
d1umqa\_ d1g2ha\_ d1mixa2 d1e5wa2 d1j19a2 d1isna2 d2a16b2 d3syxa1  
d1mkea1 d2p8va\_ d1xoda1 d1i7aa\_ d1qc6a\_ d1egxa\_ d1x14a1 d1n9pa\_  
d3vsqa\_ d2gixa1 d1b9ra\_ d1offa\_ d1frra\_ d3wcqa\_ d1e9ma\_ d1l5pa\_  
d1wria\_ d1i7ha\_ d3av8a\_ d1czpa\_ d1rfka\_ d3p1ma1 d3b2ga\_ d2bt6a2  
d1wgqa1 d1v89a1 d2coda1 d1zc3b\_ d1wg7a1 d1u5ea1 d1v61a1 d2coca1  
d2ys1a1 d1v5pa1 d1ntya2 d1wjma1 d1wi1a1 d1u29a\_ d1xx0a1 d1unqa\_  
d2zkmx3 d1fhoa\_ d1v88a1 d2adza1 d1x1fa1 d1p6sa\_ d2coaa1 d1btka\_  
d1v5ma1 d1faoa\_ d2x18a\_ d1dyna\_ d1x1ga1 d4kaxb\_ d2j59m1 d1kilb2  
d1xcga2 d1txda2 d1u5da1 d1dbha2 d1wlha\_ d1upqa\_ d1v5ua1 d1foea2  
d2fj1a1 d2dfka2 d2cofa1 d1kz7a2 d1h6ua1 d91dta1 d2ewda3 d1up7a1  
d2dfda1 d1s6ya1 d1vjta1 d7mdha1 d1hyea1 d1t2da1 d1ojsa3 d1b8pa1  
d1ldna1 d1hyha1 d1civa1 d2a92a1 d1ez4a1 d1i0za1 d1y6ja1 d1gv0a1  
d1llda1 d1obba1 d1v8ba1 d1gdha1 d1l17da1 d2dlda1 d1mx3a1 d1ygya1  
d1li4a1 d1j4aa1 d2naca1 d1npya1 d3t4ea2 d1a4ia1 d1o0sa1 d2hk9a2  
d2egga2 d1b26a1 d1bvua1 d1gq2a1 d1c1da1 d1leha1 d1gtma1 d1euza1  
d1nvtal d3dona2 d1edza1 d1gpja2 d1vi2a1 d1p77a1 d1nyta1 d1b0aa1  
d1v16a1 d1v91a1 d1txga2 d3f47a1 d1mv8a2 d2pv7a2 d1xc2a3 d2ahra2  
d4xiya1 d2f1ka2 d1pgja2 d1i36a2 d1np3a2 d1l1j8a4 d1teaa3 d1qmga2  
d2i76a2 d2g5ca2 d1wdka3 d1dlja2 d3cuma3 d1kola2 d1f8fa2 d1qora2  
d1jqba2 d1vj0a2 d1cdoa2 d1gu7a2 d1d1ta2 d1xa0a2 d2dm6a2 d1jvba2  
d1rjwa2 d1llua2 d1h2ba2 d1tt7a2 d1piwa2 d1o89a2 d1liz0a2 d1e3ja2  
d1yb5a2 d1uufa2 d1vj1a2 d1e3ia2 d3gpdg1 d1vc2a1 d2nvwa1 d1u8fo1  
d1ydwal d1hdgo1 d2g17a1 d1cf2o1 d2czca2 d1r0ka2 d1lobfo1 d2cvoa1  
d1ebfa1 d1h6da1 d1i32a1 d1zh8a1 d2q49a1 d1qkia1 d1j5pa4 d3pzra1  
d1xeaa1 d1vkoa1 d1vm6a3 d3qvsa1 d2pkqo1 d1b7go1 d1gr0a1 d1p1ja1  
d1lc0a1 d1j0xo1 d3pwka1 d2hjsa1 d1zyao1 d1vkna1 d1t1ta1 d1nvmbl  
d3sjua\_ d3ojfa1 d1xu9a1 d2jjya1 d1n7ha\_ d1y1pa1 d1h5qa\_ d1jtv\_a\_  
d4fs3a\_ d2bkaa1 d1gy8a\_ d2c5aa1 d1ulsa\_ d1ooea\_ d2b69a1 d1y5ma1  
d1spxa\_ d1aela\_ d1bxka\_ d1ydea1 d1gega\_ d1hdoa\_ d1o5ia\_ d1e6ua\_  
d1snya1 d2rhca\_ d3zv4a\_ d5ceja\_ d2d1ya1 d3w8ea\_ d2fmua1 d1x1ta\_  
d1rpna\_ d3ay7a1 d1k2wa\_ d1eq2a\_ d2hrba1 d3ruaa\_ d2ew8a1 d4hwka\_  
d1xgka\_ d2bd0a1 d1yo6a1 d2a35a1 d2ntva\_ d1vl8a\_ d1hdca\_ d4bkua\_  
d2ag5a1 d2q45a\_ d1nffa\_ d4iy1a\_ d1zbqa1 d1kewa\_ d1ek6a\_ d1ja9a\_  
d2q46a2 d1iy8a\_ d1cyda\_ d2ptga\_ d1hxha\_ d1uzma1 d3lyla\_ d4m89a\_  
d3wyea\_ d2blla1 d1w6ua\_ d1sb8a\_ d2q2va\_ d4nr0a\_ d1e6wa\_ d2gasa\_  
d3oiga1 d2bgka1 d1mxha\_ d1vl0a1 d1rkxa\_ d1r6da\_ d1wmaa1 d1e7wa\_  
d2c07a1 d1xkqa\_ d3tzha\_ d1g0oa\_ d3lz6a\_ d1qyca\_ d1ledoa\_ d1gz6a\_

d1oc2a\_ d1t2aa\_ d1zema1 d2xoxa\_ d1z45a2 d1geea\_ d1p33a\_ d3lt0a\_  
d4e6pa\_ d2wyua\_ d1db3a\_ d4q9na\_ d1xhla\_ d4olma\_ d1fmca\_ d2uvda\_  
d2gdza1 d1uaya\_ d2z1ma\_ d2o23a2 d2fr1a2 d2fr1a1 d1qsga\_ d1qyda\_  
d4zjua\_ d2a4ka1 d1ybl1a\_ d1wvga1 d1yxma1 d3f4ba\_ d1mg5a\_ d1xg5a1  
d1r55a1 d3gboa\_ d1atla\_ d1kufa\_ d1buda\_ d4q1la\_ d1yp1a\_ d1wnia\_  
d4ekfa\_ d2ckga\_ d1th0a\_ d2bkra\_ d1ex0a4 d1g0da4 d2f4ma1 d1x3za\_  
d3ulra1 d1g9ka2 d1kapp2 d1t3ca\_ d1lepwa3 d2a97a\_ d3fiea\_ g1elh.1  
d3ioqa\_ d1fh0a\_ d1o0ea\_ d1khqa\_ d1m6da\_ d2cb5a\_ d1cs8a\_ g8pch.1  
d1s4va\_ d2pnsa\_ d1vsna1 d1mira\_ d1iwda\_ d2oula\_ d7pcka\_ d3bwka\_  
d3bcna\_ d2p86a\_ d1pvja\_ d1pcia\_ d1gece\_ d1deua\_ d4bs6a\_ d1xkga1  
d1cqda\_ d1jqpa2 d2c0ya\_ d2bdza\_ d3p5ua\_ d2o36a\_ d1k9xa\_ d2jk6a2  
d2jk6a1 d1feca1 d1feca2 d1lpfa1 d1lpfa2 d1xhca1 d1xhca2 d1dxla2  
d1dxla1 d1gera2 d1m6ia2 d1onfa1 d3lada2 d3lada1 d1w4xa1 d1w4xa2  
d1gesa2 d1mo9a1 d1xdia1 d1fl2a2 d1fl2a1 d1fcda1 d1fcda2 d1h6va2  
d1h6va1 d1mo9a2 d1gv4a2 d1gv4a1 d2gv8a2 d2gv8a1 d1aoga1 d1aoga2  
d1hyua1 d1ebda1 d1ebda2 d3dk9a1 d1q1ra2 d1q1ra1 d1gesa1 d1zbf1a  
d2z1ha\_ d2etja1 d3qioa1 d1j11a\_ d2e41a\_ d1j12a\_ d21sna1 d1io2a\_  
d1uaxa\_ d2yv0x\_ d1mu2a1 d1lekea\_ d1i39a\_ d1ps9a2 d1lqta1 d1cjca1  
d1pn0a1 d1reoal d1ju2a1 d2f5va1 d3c96a1 d2gmha1 d1pj5a2 d1gpea1  
d1n4wa1 d1k0ia1 d2dw4a2 d2ivda1 d1seza1 d2voua1 d1kdga1 d1s5ja1  
d2hbja2 d2igia\_ d1wlja\_ d1qhta1 d4dlea1 d1tgoa1 d2f96a1 d3tr8a1  
d3mxma\_ d1q8ia1 d1y97a1 d1w0ha\_ d1kfsa1 d2py5a1 d1d5aa1 d1yt3a3  
d2guia\_ d3mwpal d4kb1a\_ d1iv0a\_ d1nu0a\_ d1iuka\_ d2csua1 d3q9ub\_  
d2yv1a1 d3q9na\_ d2d59a\_ d1oi7a1 d2yv2a1 d1euca1 d1y81a1 d1kv9a1  
d3nvva1 d1krha3 d2h88b1 d1t3qa2 d1kf6b2 d1zoyb1 d1jq4a\_ d1ffva2  
d1dgja2 d1rm6c2 d1r7ha\_ d1faaa\_ d1wika1 d1xfla\_ d1ttza1 d2f51a1  
d1ti3a\_ d1nhoa\_ d1sena\_ d2i4aa\_ d1ep7a\_ d1zmaa1 d1fo5a\_ d3lefa1  
d3diea1 d2yana1 d1z6na1 d1oaza\_ d3zywa1 d4aj8a\_ d1nm3a1 d4fiwa\_  
d1wmja\_ d4hs1a1 d1iloa\_ d1xwaa1 d1wjka1 d2vmla\_ d1fb6a\_ d1gh2a\_  
d1h75a\_ d1nw2a\_ d1kx5b\_ d3a6na\_ d4m6ba2 d2nqbd\_ d3wkjd\_ d2yfwe\_  
d4h9na\_ d5bnxa\_ d1kx5c\_ d3r45a\_ d1eqzb\_ d4jjnb\_ d1f66c\_ d1eqza\_  
d4wnnb\_ d1kx5a\_ d1u35c1 d1id3a\_ d2nqbc\_ d1kx5d\_ d1ku5a\_ d1flea\_  
d1b67a\_ d2b5ea2 d2b5ea3 d2b5ea1 d2b5ea4 d2kp1a1 d2kp2a1 d1hyua3  
d1hyua4 d1j08a2 d1pd212 d1nhya2 d2a2ra2 d1k0dd2 d1f2ea2 d1gsua2  
d1f3ba2 d2fhea2 d2pvqa1 d1tw9a2 d1oyja2 d1k0ma2 d3ik7a1 d4is0a1  
d1r5aa2 d1jlva2 d1m0ua2 d3gtub2 d1z9ha2 d1okta2 d1axda2 d2gsra2  
d1tu7a2 d1k3ya2 d1zgma1 d1b48a2 d1gnwa2 d1gwca2 d2gsta2 d1glqa2  
d1oe8a2 d1pn9a2 d1v2aa2 d1fw1a2 d1duga2 d3zxha\_ d1cgla\_ d1rm8a\_  
d1eaka2 d2jsda\_ d1cxva\_ d1hv5a\_ d1i76a\_ d1a0rp\_ d1ig8a1 d1czan2  
d1czan1 d1ig8a2 d1czan4 d1bg3a4 d1bg3a3 d1bg3a2 d1bg3a1 d1qqya\_  
d1gd6a\_ d1f6ra\_ d1livma\_ d2gv0a\_ d1iiza\_ d2z2fa\_ d1j8xa\_ d1ghla\_  
d1b9oa\_ d1741a\_ d1691a\_ d2o4wa\_ d1p37a\_ d1k28a3 d1xjta1 d1jtma\_  
d2f2qa\_ d4e97a1 d2pjsa1 d2i7ra1 d1ecsa\_ d1xqaa1 d5cj3a1 d1npba\_  
d1jifa\_ d2p7oa\_ d1r9ca\_ d1nkia\_ d1mpya2 d1kw3b2 d1kw3b1 d4ghga1

d1tfza1 d3isqa1 d3isqa2 d1sqia1 d1sqia2 d1lkda2 d1lkda1 d1mpya1  
d1cjxa2 d1cjxa1 d1sp9b2 d1t47a1 d1t47a2 d1flua2 d1sp8a1 d1sp8a2  
d1flua1 d1ro5a1 d4iuaa3 d4bvva\_ d5hpga\_ d3k65a\_ d1ki0a3 d1ki0a2  
d1ki0a1 d1a0ha1 d1pmla\_ d3sp8a3 d2feba1 d1qsta\_ d2beia1 d4m3sa\_  
d1u6ma1 d1yggha\_ d1yk3a1 d3dr6a\_ d1xmta\_ d1z4ea1 d2ge3a1 d1bo4a\_  
d2fiaa1 d2jdca1 d1y9wa1 d3to7a\_ d1wwza1 d2fl4a1 d2ozua1 d2b5ga\_  
d2cy2a1 d2p0wa\_ d1cm0a\_ d4pswa\_ d1yrea1 d1yr0a1 d1m4ia\_ d2gana1  
d1yvka1 d1ghea\_ d2g3aa1 d1y7ra1 d2euia1 d1q2ya\_ d2fsra1 d1xeba\_  
d2ae6a1 d1cjwa\_ d1qsm\_ d2aj6a1 d1y9ka1 d1i12a\_ d1vkca\_ d2atra1  
d1n71a\_ d2d4pa1 d2fiwa1 d2fe7a1 d1tiqa1 d2ou2a\_ d1yx0a1 d2fcka1  
d1p0ha\_ d2j8ma\_ d2pq8a\_ d1z4ra1 d1s3za1 d1ufha\_ d1c4qa\_ d1prtc1  
d2wv6d\_ d1prtf\_ d1l1trd\_ d4l63b1 d1prtd\_ d1tl0f\_ d2bosa\_ d1prtb1  
d3chbd\_ d1xvqa1 d1pn0a2 d3hy2a\_ d2cvba1 d1o8xa\_ d1lu4a\_ d1we0a1  
d2bmxa1 d2a4va1 d1psqa\_ d1xiya1 d1q98a\_ d1n8ja\_ d1zofa1 d2ggta\_  
d3tjja\_ d4je1a1 d3s9fa\_ d2zcta\_ d1qmva\_ d1jfua\_ d2b1ka\_ d5dvba1  
d2b5xa1 d2v2ga\_ d1st9a\_ d3tb2a\_ d4llra\_ d4fh8a1 d1e2ya\_ d1knga\_  
d2h30a\_ d1i5ga\_ d2z9sa\_ d2f8aa1 d1tp9a1 d2b7ka\_ d1nm3a2 d3hvva\_  
d2wfc1 d4kcea\_ d1xvwa1 d4gqca1 d3qpma\_ d4k1fa\_ d1zsoa1 d1gp1a\_  
d1prxa\_ d4od7a1 d1z6ma1 d4mcua1 d4dvca1 d1r4wa\_ d3l9sa\_ d1un2a\_  
d3rppa\_ d2qked\_ d4ksoa\_ d1t4za1 d1wwja\_ d1f74a\_ d3l21a\_ d2e1da\_  
d1to3a1 d1w3ia\_ d1sfla\_ d1n7ka\_ d1vcva1 d4imea\_ d1wa3a\_ d2ocza1  
d1f2ja\_ d3m16a\_ d2yxga\_ d1ub3a\_ d3a5fa\_ d1fbaa\_ d1l6wa\_ d1xfba1  
d1wx0a1 d1vpxa1 d1ojxa\_ d1mxsa\_ d2a4aa1 d1xkya1 d3cq0a1 d3s1xa\_  
d1f05a\_ d1fdja\_ d3cpra1 d4d2ja\_ d4aw8a\_ d1jgta2 d1lea0a3 d1ecfa2  
d1q15a2 d1ct9a2 d1ao0a2 d1te5a\_ d1ys1x\_ d4hs9a\_ d1ispa\_ d1ex9a\_  
d1ku0a\_ d3qmma\_ d1bbua1 d1e1oa1 d1c0aa1 d1b8aa1 d1l0wa1 d3a74a1  
d1eova1 d1lgya\_ d4l3wa\_ d1llfa\_ d1gz7a\_ d1ukca\_ d1cr6a2 d1svpa\_  
d1mbma\_ d3su6a1 d1cu1a1 d4agka\_ d1vcpa\_ d1q31a\_ g1n11.1 d3e90b\_  
d1ep5a\_ d3u1jb\_ d1xwdc1 d3kj4a\_ d1w8aa\_ d2ifga3 d1p9ag\_ d1xkua\_  
d3p0ya1 d1igra1 d1igra2 d1n8yc2 d1n8yc1 d1m6ba2 d1m6ba1 d1m4la\_  
d2bk7a\_ d3fjua\_ d1z5ra1 d1uwya2 d1jqga1 d2c1ca1 d1dtda\_ d1h8la2  
d1h6ta2 d1h6ua2 d1lmra\_ d1cixa\_ d1y29a\_ d1v7fa\_ d2jtba\_ d1dlha\_  
d1g9pa\_ d1lupa\_ d1qk7a\_ d1mb6a\_ d2a2va\_ d1niya\_ d1i25a\_ d1hvwa\_  
d2mpqa\_ d1ie6a\_ d1kqha\_ d1la4a\_ d2mxoa1 d1koza\_ d1qk6a\_ d1emxa\_  
d1lqra\_ d1c6wa\_ d1rmka\_ d1ixta\_ d1eyoa\_ d1cnna\_ d1fu3a\_ d1g1pa\_  
d1f3ka\_ d1fyga\_ d1rypd\_ d1irua\_ d1rypc\_ d3unfk\_ d1rypa\_ d1j2pa\_  
d1irui\_ d1j2qh\_ d3unfh\_ d1m4ya\_ d1rypb\_ d1irul\_ d1irug\_ d1iru2\_  
d1q5rh\_ d1rypg\_ d1g3ka\_ d1iruf\_ d1q5qa\_ d1e94a\_ d1irub\_ d1ryph\_  
d3ty6a\_ d1iruj\_ d1iruk\_ d1rype\_ d1irue\_ d3mi01\_ d1rypf\_ d1iruh\_  
d2z3ba\_ d1iruc\_ d3mka2\_ d1irul\_ d1e88a1 d1l6ja5 d1l6ja4 d1eaka4  
d1eaka3 d1h8pa2 d1h8pa1 d1ny721 d1ny722 d1a6ca3 d1a6ca2 d1pgl22  
d1pgl21 d1pgl11 d1ny711 d1mqta\_ d1d4m3\_ d1fmd3\_ d2mev1\_ g1aym.1  
d1ev13\_ d4q4w1\_ d1r1a3\_ d2x5ia\_ d1rhi1\_ g1r1a.1 g1d4m.1 g1rhi.1  
d1b35b\_ d1lopa\_ d1tme1\_ d4iv1a\_ g1pvc.1 g1fpn.1 d1fpn1\_ d4gb31\_

d1d4m1\_ d1fmd1\_ d1evl1\_ d2wzr3\_ g1cov.1 d1qqp3\_ g1fmd.1 d2x5ic\_  
d1rhi3\_ g1oop.1 d1hxs1\_ d1fnp3\_ d1bev1\_ g2mev.1 d1eah3\_ d1aym1\_  
d1pvc3\_ d1qqp1\_ d1zba3\_ d1h8ta\_ d3vbhc\_ g1b35.1 g1bev.1 d1hxs3\_  
g1evl.1 d1bev3\_ g1tmf.1 d1tmf1\_ d1b35a\_ d2mev3\_ g1eah.1 g1h8t.1  
d1eah1\_ d4q4w3\_ d1r1a1\_ d1aym3\_ d1pvc1\_ d1zba1\_ d1h8tc\_ d1oopc\_  
d1tme3\_ g1qqp.1 d4iv1c\_ g1tme.1 d3ubub\_ d1egia\_ d1qo3c\_ d1v7pa\_  
d1tdqb\_ d3ubua\_ d1c3ab\_ d1h8ua\_ d3bx4b\_ d1t8ca1 d1sb2a1 d1qdda\_  
d2ziba1 d3cada\_ d1byfa\_ d1j34b\_ d1jwia\_ d1jzna\_ d1c3aa\_ d1oz7b\_  
d1wmza\_ d3bdwb\_ d1hq8a\_ d1fifa1 d1dv8a\_ d3hupa\_ d1wk1a1 d1umra\_  
d2afpa\_ d3bx4a\_ d1gz2a\_ d1sl6a\_ d1v7pb\_ d3g8ka\_ d1ixxa\_ d1j34a\_  
d1jwib\_ d1g1sa1 d1y17a1 d1ja3a\_ d1fvub\_ d3bdwa\_ d1sb2b1 d1fvua\_  
d1umrc\_ d1oz7a\_ d4m17a\_ d3cfwa1 d1ypqa1 d1g1ta1 d3fd4a\_ d3l9jc\_  
d4dn8a1 d1v4lb\_ d1rdl1\_ d3ia2a\_ d1a88a\_ d4dgqa1 d1hkha\_ d1zoia\_  
d4lt9a1 d3tc7a1 d3hoja\_ d1i4na\_ d3vnda\_ d3nl8a1 d1geqa\_ d3nav1a1  
d1v5xa\_ d4a2ra1 d3tc6a1 d1ujpa\_ d4ijba\_ d1xcfa\_ d1vc4a\_ d1rd5a\_  
d1qopa\_ d3b5va\_ d2r80b\_ d1cqxa1 d1cg5a\_ d1gcvb\_ d3boma\_ d2h8fb\_  
d2raoa\_ d3bj1a\_ d4hrrb\_ d2r50a\_ d3d1kb\_ d2aa1b1 d3zhwa\_ d3hf4b\_  
d3gdja\_ d1jebb\_ d3bj1b\_ d1x9fb\_ d1wmub\_ d1gcva\_ d3bcqb\_ d3d4xb\_  
d1gvha1 d2dc3a\_ d3hf4a\_ d4yu3a\_ d3k8ba\_ d1qpwb\_ d2r80a\_ d3bcqa\_  
d1v4wa\_ d3wtgb\_ d1j17a\_ d4esaa\_ d1a9we\_ d3d1ab\_ d1fsla\_ d4h21a\_  
d1v4wb\_ d1mwca\_ d1vhba\_ d1jeba\_ d1spgb\_ d1h97a\_ d1q1fa\_ d1tu9a1  
d3d1aa\_ d1hdsb\_ d3hyub\_ d2zfb\_ d3fs4a\_ d1oj6a\_ d1shrb\_ d4h21b\_  
d4yu3b\_ d3hrwa\_ d3qqra\_ d3at5a\_ d4wchd\_ d3hyua\_ d1cg5b\_ d1uc3a\_  
d1hbra\_ d2raob\_ d1outb\_ d4esab\_ d3gdjb\_ d3qqqa\_ d1x9fc\_ d3vrfa\_  
d1litha\_ d3mkba\_ d3d4xa\_ d3mjpa\_ d1j16a\_ d3fh9a\_ d1outa\_ d2dc3b\_  
d1it2a\_ d3eoka\_ d3g46a\_ d1qpwa\_ d3vrfb\_ d1ch4a\_ d1x9fd\_ d1hdsa\_  
d2zfb\_ d3mkbb\_ d1or4a\_ d3wtga\_ d1a4fa\_ d3fh9b\_ d3bomb\_ d3cy5a\_  
d3at5b\_ d1x9fa\_ d2oifa\_ d4lmb\_ d1cpcb\_ d3v57a\_ d1kn1a\_ d1cpca\_  
d4f0ta\_ d2vjha\_ d4po5b\_ d1eyxa\_ d1alla\_ d4f0tb\_ d1b33b\_ d1b8db\_  
d4h0mb\_ d1b33a\_ d2vjhb\_ d4lm6b\_ d2vmlb\_ d1allb\_ d2vjta\_ d3dbja\_  
d2vmla\_ d2vjtb\_ d4f0ub\_ d1f99b\_ d4rmpa1 d1liaa\_ d1eyxb\_ d2uulb\_  
d4lmsb\_ d4f0ua\_ d2bv8a\_ d1f99a\_ d2bv8b\_ d2c71b\_ d3dbjb\_ d4rmpb1  
d1b8da\_ d4h0ma\_ d3v57b\_ d1liab\_ d2uula\_ d2j96a\_ g1gxs.1 g1wht.1  
d1mtza\_ d2xqfa\_ d1f6wa\_ d1dx4a\_ d1qe3a\_ d1k4ya\_ d4qwwa\_ d2ha2a\_  
d3c8da2 d2pbla1 d1jkma\_ d1jjia\_ d1lzl1a\_ d1jjfa\_ d2qvba\_ d2v9za\_  
d4kafa1 d1s5ja2 d1qhta2 d4dlea2 d1tgoa2 d3py8a2 d1q8ia2 d1kfsa2  
d2py5a2 d1d5aa2 d2m5ta\_ d1cqqa\_ d1wqsa\_ d5bpea\_ d2ipha\_ d1lvoa\_  
d2bhga1 d3tnta\_ d3sjia\_ d3d23a1 d2fyqa\_ d3tloa\_ d3zvea1 d2hrva\_  
d3q3ya1 d4asha1 d1cg2a1 d1yloa2 d1y7ea2 d1y0ya3 d1lfwa1 d1vixa1  
d1fnoa4 d1ysja1 d1vhea2 d1z21a1 d2fvga2 d1vgya1 d1r3na1 d2grea2  
d1xmba1 g1q71.1 d1rtqa\_ d3rp2a\_ g1lucy.1 d1fuja\_ d2zchp\_ d3w94a\_  
d1si5h\_ d1lo6a\_ g2pka.1 d1cgha\_ d1kigh\_ d1a5ia\_ d3s9ba\_ d1hj8a\_  
d1ao5a\_ d2anya\_ d1q3xa1 d1gvza\_ d1azza\_ d4gsoa\_ d2f91a1 d1liaua\_  
d1gdna\_ d1eufa\_ g1fiw.1 d1eq9a\_ d4nfea\_ d2rdla\_ d1spja\_ d1elva1

d1a7sa\_ d1ekbb\_ d1pfxc\_ d1yc0a\_ d2aiqa\_ glfiz.1 d1fi8a\_ d4k60a\_  
d4dgja\_ d1mzaa\_ d1op0a\_ d3tjva\_ d1pytd\_ d1sgfg\_ glgg6.1 d2eeka\_  
g1rtf.1 d1a0ja\_ d3g01a\_ d1pytc\_ d4e7na\_ d1ddja\_ d1z8ga1 d2hlca\_  
d1npma\_ d1brup\_ gljou.1 d1sgfa\_ d1autc\_ g2hnt.1 glkdq.1 d1orfa\_  
d3s69a\_ d4crga\_ d1fxya\_ d1bqya\_ d2ftba\_ d1pmpa\_ d2rcqa1 d1fdqa\_  
d4lkpa\_ d1sa8a\_ d1vyfa\_ d1lpja\_ d3vg7a1 d4azqa1 d1o8va\_ d5bvqa\_  
d1p6pa\_ d2qo4a\_ d1opba\_ d1yiva1 d1o1va\_ d4bvma1 d4tkba\_ d4i3ba\_  
d1bwya\_ d1ftpa\_ d1ggla\_ d4gkca\_ d1cbia\_ d3p6da1 d1kqwa\_ d2a0aa1  
d1jx4a2 d3gv5b1 d1t94a2 d3bq0a2 d4lu0a\_ d1of8a\_ d3unda1 d3e9aa1  
d1vr6a2 d1n8fa\_ d2qkfa\_ d1d9ea\_ d1o60a\_ d1e69a\_ d1mv5a\_ d3g60a4  
g1ii8.1 d1ewqa2 d1ji0a\_ d1qhla\_ d1v43a3 d2wmfa1 d1vpla\_ d1g2912  
d4a82a2 g1f2t.1 d2d62a1 d3tuic1 d2bbsa1 d3g60a3 d2ixea\_ d1g6ha\_  
d1sgwa1 d2qi9c\_ d3rlfa1 d3b60a1 d3d31a2 d2pzea1 glxew.1 d1jj7a\_  
d1oxxk2 d2onka1 d1wlwa\_ d1iwea\_ d1qf5a\_ d1vmaa2 d1nija1 d1np6a\_  
d2p67a1 d3ihla\_ d1okkd2 d1ls1a2 d1s1ma2 d1iona\_ d2v40a\_ d1dj3a\_  
d3hida\_ d2vola1 d2g0ta1 d1vcoa2 d1j8mf2 d1g3qa\_ d1xjca\_ d1p9ba\_  
d1qzxa3 d1ihua1 d2qm8a\_ d1dj2a\_ d4ioja\_ d1cp2a\_ d1yrba2 d1hyqa\_  
d3gqba2 d1skye3 d1xp8a1 d1tf7a2 d1tf7a1 d1ye8a1 d1skyb3 d2qe7d2  
d4blta\_ d4huta\_ d3l1daa2 d4hyya\_ d2i3ba1 d1crla\_ d3j9tb2 d3ntua2  
d1vdza1 d2z43a\_ d1e9ra\_ d1nlfa\_ d3ziaa2 d1n0wa\_ d3ziad2 d3j9ta2  
d1pzna2 d3gqbb2 d2i49a\_ d1nnfa\_ d1xvxa\_ d1ursa\_ d1h3da1 d1iuda\_  
d4m1va1 d1twya\_ d3e13x\_ d2nxoa1 d4pfua\_ d3ttma\_ d1elja\_ d2qmw1  
d1us5a\_ d1y3na1 d1jeta\_ d1uqwa\_ d4f19a1 d2esna2 d3thia\_ d3fasa1  
d2uyeb\_ d2xwva1 d1r9la\_ d2fyia1 d1pb7a\_ d2ozza1 d1sw5a\_ d1nh8a1  
d1vr5a1 d2g29a\_ d1xs5a\_ d3lswa\_ d2z23a\_ d3w9va\_ d3tcha\_ d1q35a\_  
d1z7me1 d3q27a\_ d1p99a\_ d1ve4a1 d2i6ea1 d4mcoa1 d4n8ya\_ d1eu8a\_  
d1z8ma1 d1ixca2 d1j1na\_ d1xvya\_ d1y9ua\_ d2z22a1 d1xoca1 d4oera\_  
d1wdna\_ d5f1qa1 d1xt8a1 d1i6aa\_ d4gwoa\_ d4igta1 d1pc3a\_ d4mmpa1  
d1o63a\_ d2cz1a1 d2onsa2 d4mija1 d1eh3a\_ d3skpa\_ d1dtza1 d1dtza2  
d1ieja\_ d1jnfa2 d1ce2a1 d1jnfa1 d1b1xa1 d1jw1a1 d1jw1a2 d1ryoa\_  
d1h76a1 d1h76a2 d1c4oa1 d2p6ra3 d2p6ra4 d1oywa2 d1oywa3 d1wrba1  
d1w36b2 d1w36b1 d1c4oa2 d3bora\_ d1t6na\_ d2eyqa5 d2eyqa3 d2eyqa2  
d2zu6a2 d1veca\_ d1uaaa1 d1w36d1 d2g9na1 d1z3ix2 d2rb4a\_ d1hv8a1  
d1hv8a2 d1t5ia\_ d1w36c2 d2j0sa2 d2j0sa1 d1fuka\_ d3hjha1 d1z5za1  
d1z63a1 d1s2ma2 d1s2ma1 d1wp9a1 d1wp9a2 d1gm5a3 d1gm5a4 d3dina4  
d3dina3 d1q0ua\_ d1w36c1 d1z3ix1 d1nkta3 d1nkta4 d1uaaa2 d1w36d2  
g1qhh.1 d2fwra2 d2fwra1 d1oewa\_ d2qzxa\_ d2asia\_ d1miqa\_ d1smra\_  
d2h6ta\_ d1pfza\_ d1lizda\_ d3hd8a\_ d1j71a\_ d1dpja\_ d4aa9a\_ d1t6ex\_  
g1b5f.1 g1lya.1 g1htr.1 d1qdma2 d1bxoa\_ d1wkra\_ d1tzsa\_ d1libqa\_  
d2qzwa\_ d2v76a\_ d1wj1a1 d1aqca\_ d1qqga2 d1qqga1 d1ntva\_ d1n3ha\_  
d4dbba\_ d3f0wa1 d1p3ra\_ d1wgua1 d2cy4a1 d3hqca\_ d1wvha1 d1xr0b1  
d1bdqa\_ d3ggta\_ d3ixoa\_ d1mrxa\_ d2haha\_ d1tw7a\_ d4njsa\_ d1sgua\_  
d2p3da\_ d1nsoa\_ d3d3ta\_ d2rkfa\_ d1c6ya\_ d2rspa\_ d3ogpa\_ d3ekwa\_  
d2o4na\_ d2j9ja\_ d3ggua\_ d3lzua\_ d4npua\_ d4j55a\_ d2r8na\_ d2fxda\_

d2p3ca\_ d4dqea\_ d3ttpa\_ d3t3ca\_ d2p3aa\_ d2hc0a\_ d2fdda\_ d3mwsa\_  
d1sr9a2 d1rqba2 d1k8rb\_ d1wgra1 d1ef5a\_ d1wfyal d1e8ya3 d1wgyal  
d1l1fa\_ d2cs4a1 d1wxma1 d2byea1 d3kh0a1 d2byfa1 d1wxaa1 d1wgda1  
d1wggal d4q5eb\_ d1wjna1 d1se9a\_ d3n3kb\_ d1wz0a1 d1we6a1 d2m0xa\_  
d2gbka\_ d3rt3b1 d1wh3a1 d1sifa\_ d2ekek2 d4ii2b1 d4hk2a1 d1c3ta\_  
d1m94a\_ d1wgha1 d1ttna1 d1j8ca\_ d1wx8a1 d3v6cb1 d2ma9b\_ d4i6lb1  
d1bt0a\_ d2jvca1 d1iyfa\_ d2k1fa\_ d1wxva1 d1wf9a1 d1t0ya\_ d2io0b2  
d1x1ma1 d2gbma\_ d1zw7a1 d2m17a\_ d1we7a1 d2lwp\_ d2gbja\_ d1wjua1  
d1v6ea1 d1v86a1 d4eewa\_ d1wiaa1 d4icva\_ d4gu2a\_ d1wx7a1 d1wy8a1  
d4hjk1 d2faza1 d1v5oa1 d2h1ia1 d2r8ba1 d3b5ea1 d3cn9a\_ d3ubra\_  
d1qo8a1 d1d4ca1 d2k3va\_ d1ft5a\_ d1qdba\_ d1m1qa\_ d2j7aa\_ d1h21a\_  
d1ogyb\_ d4fasa\_ d1jnia\_ d1oaha\_ d1sp3a\_ d3nqyb\_ d4gera\_ d1bqba\_  
d1yvca1 d1yeza1 d1g66a\_ d1qoza\_ d5ajha1 d1wioa4 d1ccza2 d1vcaa1  
d1dr9a2 d2d9qb1 d2nxyb2 d1um8a\_ d1ixza\_ d1qvra2 d1qvra3 d1qzma\_  
d1sxjc2 d1jr3d2 d2p65a\_ d118qa2 d3hu3a3 d1sxjd2 d1njfa\_ d1in4a2  
d1sxja2 d1tuea1 d2ce7a2 d1w5sa2 d1sxjb2 d1d2na\_ d1ny5a2 d1ofha\_  
d2gnoa2 d2a5yb3 d1fnaa2 d1u0ja1 d1lv7a\_ d1iqpa2 d2fnaa2 d1ixsb2  
d4gita\_ d1sxje2 d1g41a\_ d21j7a\_ d1n4na\_ d2m8bb1 d2kyqa\_ d3psma\_  
d1jxca\_ d2g11a\_ d1ugla\_ d4uj0a\_ d2k4ua\_ d1hp2a\_ d2lu9a\_ d1baha\_  
d2meoa1 d1wm7a\_ d1hlya\_ d1n8ma\_ d1jlza\_ d1wpda\_ d1c55a\_ d1pvza\_  
d1wt7a\_ d1rjia\_ d1wz5a\_ d1m2sa\_ d1pjva\_ d1c49a\_ d1qkya\_ d2ktca1  
d1wmta\_ d1du9a\_ d1j5ja\_ d1rlga\_ d1t0za\_ d2i61a\_ d1t1ta\_ d1sn4a\_  
d1kv0a\_ d21kba\_ d1npia\_ d1wwna\_ d1pe4a\_ d2kbka\_ d2li7a\_ d1djta\_  
d2kbha\_ d1dq7a\_ d1sega\_ d1omya\_ d1zywa1 d1bnla\_ d1iyjb4 d1iyjb5  
d1iyjb3 d1o7ia\_ d4ipca1 d1x3ea\_ d4apva\_ d1jb7a1 d1jb7a2 d1jb7a3  
d3kdfa\_ d1ue1b\_ d1wjja1 d3eiva\_ d1xjva2 d1xjva1 d2ccza2 d1se8a\_  
d1l1oc\_ d1jb7b\_ d1qvca\_ d3ulla\_ d1qzga\_ d1mia4 d1mia5 d1mia3  
d3g48a1 d1gd7a\_ d1mkha\_ d1jjcb3 d1pyba\_ d1y14b1 d2nn6i1 d1i94l\_  
d2zjra2 d1smxa\_ d2qamc2 d1hh2p1 d2r7da1 d1rl2a2 d1wfga1 d3bzka4  
d1x6oa2 d3a0ja\_ d2j01d2 d2ja9a1 d4q15a\_ d1hr0w\_ d1luza\_ d2n3sa\_  
d2vnud1 d1h95a\_ d1go3e1 d2nn6h1 d1ne3a\_ d2mola\_ d1iz6a2 d1jjga\_  
d1e3pa2 d2ix0a3 d2ix0a2 d2lxja\_ d1ueba3 d1ueba2 d2z0sa1 d1u0la1  
d2ix0a1 d2eifa2 d2je6i1 d3i2za1 d2c35b1 d2ahob2 d1t9ha1 d3i4oa\_  
d2qall1 d1jt8a\_ d2nn6g1 d1g6pa\_ d3cama\_ d1i94q\_ d1c9oa\_ d1d7qa\_  
d2ba0a1 d2vnud2 d2vnud3 d1khia2 d2qalq1 d1wi5a1 d1xtda2 d1ny4a\_  
d1dzka\_ d4tlja\_ d2a2ua\_ d4wfva\_ d3t1da\_ d4iaxa\_ d3zq3a\_ d2nnda\_  
d1i4ua\_ d1kxoa\_ d1bbpa\_ d1kt7a\_ d1exsa\_ d3s26a1 d1lf7a\_ d1qfta\_  
d4gh7a\_ d1z24a1 d1qabe\_ d1xkia\_ d1ew3a\_ d3bx7a\_ d4iawa1 d1n0sa\_  
d1gkab\_ d3kzaa\_ d2k23a\_ d2l9ca1 d2joza1 d1gm6a\_ d3kffa\_ d3saoa1  
d1e5pa\_ d1yupa1 d1iiua\_ d1f00i3 d1rpma\_ d1yfoa\_ d1l8ka\_ d2ooqa1  
d1g4us2 d1p15a\_ d1lara2 d1lara1 d1wcha\_ d2fh7a2 d2fh7a1 d3azya\_  
d3wvja\_ d1upsa1 d1ajoa\_ d2hyka\_ d2vy0a\_ d1o4ya\_ d3o5sa\_ d3d6ea\_  
d3atga\_ d1dypa\_ d1lumza\_ d3i4ia\_ d1c1la\_ d4lbqa\_ d1a78a\_ d4no4a\_  
d3zsja\_ d3duia\_ d1g86a\_ d1is3a\_ d1qmja\_ d1hlca\_ g1qmo.1 g1len.1

d3zyra\_ d1fnaya\_ d1n47a\_ g2ltn.1 d1avba\_ d3usua\_ d1dhkb\_ d1f9ka\_  
d1g8wa\_ d1g9fa\_ d1wbfa\_ d3wcsa\_ d1g7ya\_ g1loe.1 d1mvqa\_ d1hqla\_  
d1v6ia\_ d1dbna\_ d1qnwa\_ d1fx5a\_ d4l8qa\_ d1ioaa\_ d3n35a\_ d2h0ba\_  
d2erfa\_ d1h30a2 d3mw4a1 d1pz7a\_ d2r1ba\_ d3v64a1 d1d2sa\_ d3bopa1  
d3mw3a1 d1okqa1 d1okqa2 d1dszb\_ d1a6ya\_ d3cbba\_ d1ynwa1 d1r4ia\_  
d1hcqa\_ d2hana\_ d2hanb\_ d2enva1 d1kb4b\_ d2n1lb\_ d1l0la\_ d1cita\_  
d2dara2 d2dara1 d1wyha2 d2dloa2 d1rutx4 d1rutx3 d2cuqa2 d1x4la2  
d1x4la1 d1x3ha2 d1x3ha1 d2d8za1 d1x61a2 d1x6aa1 d1x6aa2 d2cora2  
d2cora1 d1v6ga1 d1v6ga2 d2d8za2 d1x64a1 d1x64a2 d1b8ta1 d2co8a1  
d1x63a2 d2dj7a2 d2dj7a1 d2cu8a2 d2cu8a1 d1g47a2 d1g47a1 d1j2oa1  
d1wyha1 d2dloa1 d1wiga1 d1wiga2 d2cupa2 d2cupa3 d1x68a1 d2d8ya2  
d2d8ya1 d1m3va2 d1x62a1 d1x68a2 d1x61a1 d1b8ta3 d1b8ta2 d2d8xa2  
d2d8xa1 d1x4ka1 d1x4ka2 d2cuqa1 d1m3va1 d2co8a2 d1j2oa2 d1x63a1  
d2cura1 d2cura2 d1x62a2 d1op9a\_ d1y0la1 d1etzb1 d1legj11 d2gsib1  
d1nj9a1 d4jfh1 d1aqk11 d1t2ja\_ d1l04h1 d1zvya1 d3v4v11 d4enec1  
d1kxtb\_ d5e8ea1 d2pxya\_ d4weud\_ d1xiwc\_ d2esvd1 d1qnzh\_ d1logae1  
d1f4xh1 d4n1hb\_ d3ezjb1 d3mlw11 d1kfah1 d1etza1 d1b4jh1 d3cfic\_  
d4w68a\_ d2arja1 d1ek3a\_ d2ok0l1 d1vera\_ d1uwgh1 d1blnb1 d1fpth1  
d1rzga1 d2giya1 d4m3kb1 d1nc2a1 d2nyyd1 d1ncna\_ d1fbih1 d5dxwa\_  
d4fqqa1 d1dqdh1 d1jfq11 d1kelh1 d1faih1 d1frgl1 d1figl1 d4m6n11  
d1fo0a\_ d4hxb11 d3b5ga\_ d3quyd1 d2h9gb1 d1i8kb\_ d2dd8h1 d2ck0h1  
d1eaja\_ d4w6wb1 d2a6ib3 d1t66d1 d2e27h\_ d1ob1b1 d1f11b1 d2v7na1  
d1ad0a1 d2xt1b1 d1pskh1 d4i13b1 d2op4l1 d1a0ql1 d1luwel1 d1za3a1  
d1ncb11 d4uu9a\_ d1bm3h1 d1cloh1 d1nqba2 d1cf8h1 d4y5va\_ d1mhph1  
d5anma1 d4cdgc1 d4ldeb\_ d1y0lb1 d2pcpb1 d1z3gl1 d1dfb11 d1fh5h1  
d3g5xa1 d1tzib1 d4dn3l1 d3zhka1 d2b1hh1 d2uyla1 d1f3dh1 d1nj9b1  
d2agjh1 d2h1pl1 d1q72h1 d8fabb1 d1ndmb1 d1rjca1 d4u6hb1 d3upca\_  
d2fbj11 d1osph1 d1tvda\_ d2cjev\_ d4fhbd1 d1bd2d1 d1rz7h1 d3nn8a\_  
d1blna1 d1knoa1 d1nfda1 d2bmkb1 d1dq11\_ d1igyb1 d1igf11 d12e8h1  
d3utza1 d1nc2b1 d1rihh1 d4mwfb1 d4jvpa1 d1mieh1 d1rhfa1 d1fgn11  
d1sbsh1 d1lp9e1 d1dn0a1 d4lqf11 d1iaih1 d1kgcd1 d1mh5b1 d1gpol1  
d2g60h3 d1f8tl1 d2jixd1 d4grwh\_ d1fo0b\_ d1bfob1 d1axsa1 d1u9ka\_  
d1nmbh\_ d1h8na1 d1h8na2 d1jguh1 d4eura1 d3sdy11 d35c8h1 d1w72l1  
d1mvub\_ d1i9rh1 d1ob1a1 d4wenb\_ d1yeeh1 d3ietc1 d1f58h1 d1ad0b1  
d1mqk1\_ d1nbvh1 d4b50a\_ d3r8bb\_ d1baf11 d1mamh1 d4rgne1 d2gsgb\_  
d35c8l1 d1bafh1 d1ai1h1 d2pcpa1 d2fath1 d2x1pa\_ d1orsb1 d1ibgl1  
d1shma\_ d1a2yb\_ d1u0qa\_ d2coqa\_ d1hilb1 d1qfwi\_ d1jv5b\_ d1fn4b1  
d5e0qa\_ d1nsnh1 d1plgl1 d4ocxl1 d1kb5h1 d1rzfh1 d1pg7x1 d2fx7h1  
d2oi9c\_ d1l7il1 d3eyva1 d1d5il1 d4ffyl\_ d1tet11 d1a6wh\_ d1lac6a\_  
d3dvfa\_ d1nfde1 d1mimh1 d1ri8a1 d1jhlh\_ d3dura\_ d1fskb1 d1f97a1  
d3so3b1 d2ak4d1 d1lp9f1 d4z7wf1 d1l7th1 d4y5ya\_ d4x7ec1 d1emth1  
d1likf11 d1nlbh1 d4utal1 d1bjma1 d1eapb1 d1u6ah1 d2dtgd1 d1kj2b\_  
d1xeda1 d1cleh1 d1fgvh\_ d2bnub1 d2fb4h1 d2dtgb1 d1ktrh\_ d1jpth1  
d1qkz11 d4hepg\_ d2atpb1 d1flrh1 d2hrpl1 d1mvfa\_ d1iaim1 d3k80a1

d2jb5h1 d3zkxc\_ d4grwe\_ dlit9h1 d1rhbb1 d3w9ec\_ d1e4wh1 d1sy6h1  
d2j6eh1 d3qxta\_ d1jglh1 d1p7ka1 d1tzhb1 d4n8pa1 d1gaf11 d2jelh1  
d1wioa2 d4i0cc1 d1cicb1 d1lmka2 d1lmka1 d1iqwh1 d1lorqb1 d1ejoh1  
d1jnlh1 d4zgl1\_ d43c9b\_ d1ggbl1 d1wejh1 d3q6fa1 d1f3dj1 d3c6la1  
d1bqlh1 d3p9wb\_ d1a3r11 d1h0db1 d2uzil\_ d1eo811 d1qfwl\_ d1n7ml1  
d1igja1 d1c5ch1 d2a9mh\_ d1rmfh1 d1fj1b1 d4heme\_ d1ccza1 d1a5fh1  
d1ogad1 d1dlfh\_ d1qa9b\_ d1vgel1 d3qskb\_ d1sjxa\_ d4ozfg1 d1sq2n\_  
d1qd0a\_ d1kcvh1 d1c5db1 d3qcul1 d8faba1 d3bn9d1 d1mjuh1 d4y8dc\_  
d7fabh1 d3dvgb1 d1lo011 d1a6tb1 d1gigh1 d1kcrh1 d2hwz11 d1yjdc1  
d3clfl1 d4krna\_ d1d171\_ d1e6o11 d1mexh1 d3r0ma\_ d4kkna\_ d1fnsl1  
d1oaqh\_ d1rzia1 d1lucb1 d1ncw11 d4b41a\_ d1nfd1 d2mpah1 d2d7t11  
d4grwf\_ d4b5ea\_ d1lk3h1 d3u79a\_ d4u3xa\_ d1ghf11 d1bvkb\_ d1mcw1  
d1b88a\_ d1jrrh1 d32c2b1 d4wemb\_ d1dsfh\_ d1op3h1 d1ce111 d1iqda1  
d1qoka1 d1qoka2 d1qfuh1 d2crya1 d1ay1h1 d1oaql\_ d3ab0b\_ d1rur11  
d1t4kb1 d1bz7b1 d1n0xh1 d1for11 d1lucb1 d4w6yb\_ d43c9a\_ d2aab11  
d1tzia1 d4n1ca\_ d1k6qh1 d3g9ab\_ d4tvs1 d1igmh\_ d1pz5b1 d3dx9a1  
d3wxwh\_ d1nakh1 d1kcul1 d3eaka\_ d4qlra1 d1cr911 d1d9ka\_ d1f4x11  
d1deea1 d2i27n2 d1c12a1 d2orbl1 d1j8hd1 d1mcph1 d1c5da1 d1kenh1  
d1bd2e1 d1h5ba\_ d4x7fc1 d3upaa\_ d1t3fa1 d1indh1 d2dtgc1 d4hc111  
d1zv5a1 d4wgvb\_ d1uwgl1 d4f37k1 d1aqkh1 d1vesa\_ d3zkqd\_ d1fpt11  
d1lo411 d1knob1 d3rrqa\_ d1ct8b1 d4orz\_ d1mlbb1 d4hgkc1 d1dqdl1  
d1bogb1 d4ozhe1 d1dr9a1 d1i7za1 d1dn0b1 d1kell1 d1rrib1 d1ypzf1  
d1wtla\_ d1hkfa\_ d1fail1 d1figh1 d2vyre\_ d1sjva\_ d1ohqa\_ d1bfoa1  
d1pkqb1 d1mjul1 d1b4j11 d1nsl1 d2arjb1 d1p4bh\_ d4aj0a\_ d3nn8b\_  
d2rcja1 d1f2xk\_ d4v1dd\_ d1adqh1 d2eksa\_ d4k3ga\_ d1jfqh1 d1uweh1  
d1frgh1 d4gftb\_ d1uz8b1 d4n1ea\_ d1bm311 d1clol1 d3mcka1 d2vq1a1  
d1ae6h1 d4aq1b1 d1uj3b1 d1nbqa1 d1fh511 d2ck011 d2ywza\_ d1q7211  
d4nbxb\_ d1hila1 d4hz1b1 d2j8811 d1zmya1 d1cd0a\_ d1a4ka1 d1psk11  
d1a0qh1 d4krmb\_ d1ncbh1 d2fbjh1 d1j8he1 d1i3ua\_ d1cf811 d1fe8h1  
d2p1ya1 d1eeqa\_ d2x89a\_ d1o10a\_ d2r01h1 d1ub5a1 d1dfbh1 d3eyvb1  
d4jdvb1 d4p2cg\_ d2gsia1 d2agj11 d1u3ha1 d2h1ph1 d1rih11 d1fskc1  
d1boga1 d2a7711 d1osp11 d1qfoa\_ d3dwta\_ d2fx711 d1rz711 d3stba1  
d1pkqa1 d1b6da1 d1dzba2 d1dzba1 d1kj2a\_ d4l1ha\_ d1rzgb1 d1dq1h\_  
d12e811 d1miel1 d1jmaa\_ d1sbs11 d1fgnh1 d1f5811 d1mqkh\_ d1ndgb1  
d3qeg11 d1iail1 d2aw2a1 d1tqbc1 d3fo2a1 d4dkaa\_ d1f8th1 d2g6011  
d2ywy\_ d1uj3a1 d1yc7a\_ d3bd3a\_ d4w6xb1 d1nmb1\_ d1i8ka\_ d1rjlb1  
d1ypze1 d1p7kb1 d1kxqe\_ d1gpoh1 d2z4qa1 d1w72h1 d1i9r11 d4qgya1  
d4xt1c\_ d2qqnh1 d1cica1 d3c08h1 d2cd0a\_ d2bdnh1 d1hnga1 d1mam11  
d1nldh1 d1cr9h1 d4lcih1 d3bkyh1 d3qg711 d1ai111 d1kxvc\_ d4iosd\_  
d1l7ih1 d2x1qa\_ d1ub6b1 d3k74b\_ d1libgh1 d1teth1 d1igya1 d1hxma1  
d2x6ma\_ d2e71a\_ d5e03a\_ d1qfwm\_ d2r0kh1 d1igjb1 d1rurh1 d1plgh1  
d1mj8h1 d1yuhb1 d3fmg11 d1rzfl1 d1emt11 d1ad9b1 d1igtb1 d1nlb11  
d1d5ih1 d3k7ua\_ d4ffyh\_ d3dvga1 d1a6ta1 d1fgv1\_ d4qxgl1 d1mim11  
d1jh11\_ d2hffb1 d2hh011 d1qkzh1 d1l7t11 d1afvh1 d1iaii1 d2cjuh\_



d1um5h1 d2ghwb2 d2ghwb1 d1kgce1 d2fgwh1 dlikfh1 d1dvfd\_ d2i24n1  
d2xtjb\_ d1za3b1 d2yc1a\_ d2hh0h1 d2x1oa\_ d1bvka\_ d1rjla1 d5e7ba1  
d1igta1 d1i11b1 d2fb4l1 d1mvua\_ d1jpt11 d32c2a1 d1fvca\_ d1iqdb1  
d2hrph1 d2p4ab\_ d4qo1a\_ d1p2cb1 d1wt5c\_ d1t4ka1 d5c1mb\_ d1it9l1  
d1bz7a1 d1b2wh1 d1e4wl1 d1jnl11 d1yedb1 d1za6b1 d3u7aa\_ d1igfh1  
d3gnm11 d1orsa1 d1wejl1 d1a2ya\_ d1hxmb1 d1gafh1 d2j4wh1 d1pz5a1  
d1j05a\_ d1a3rh1 d4fq1l1 d1qfwh\_ d1eo8h1 d1n7mh1 d4s11a\_ d1kegh1  
d5da4a\_ d1iqwl1 d3whxb1 d1vgeh1 d1deeb1 d1c12b1 d1t2ql1 d1ad9a1  
d3gsnb1 d3b2uc1 d1ggbh1 d1t3fb1 d1nak11 d4ocmc\_ d1lila1 d2v7hb3  
d2esve1 d1mcoh1 d2qr0b1 d2q3aa\_ d1ct8a1 d1kcr11 d2pxyb\_ d2uzih\_  
d5c3ld\_ d3durb\_ d1c5cl1 d2ak4e1 d1d17h\_ d1xiwd\_ d1mlba1 d1rmfl1  
d1i7zb1 d1dlfl\_ d2xa3a\_ d5bq7b1 d1dqqb1 d3h42l1 dlegjh1 d1kcv11  
d1fe8l1 d2j6e11 d1f3rb2 d1l1k3l1 d1sm3h1 d1q0xh1 d1ghfh1 d7fabl1  
d1igch1 d1l00h1 d4idla\_ d5c2b1\_ d1jrh11 d1i11a1 d3zhda1 d4kfzc\_  
d1b0wa\_ d1e6oh1 d1mex11 d4krpb\_ d1fnsh1 d1ncwh1 d4hgma\_ d4eigb1  
d4rzca\_ d2mpal1 d4y5xa\_ d5en2b1 d3lrga1 d4ej1c1 d1rhha1 d1j05b\_  
d1forh1 d1q9wb1 d2wzpd\_ d2aq2a1 d1h0da1 d3revb1 d2ij0c1 d1tzh1  
d4m7jl1 d1k6ql1 d3b9kc1 d1igml\_ d3qeua1 d1dsfl\_ d1celh1 d1kcu11  
d1zvha1 d1zvoa1 d1tqbb1 d1ay1l1 d2qsc11 d2cgrh1 d1n10h1 d1ken11  
d3eo0a1 d4n9ob1 d1n0x11 d3k1kc\_ d2aq2b1 d1ck1a1 d1i4pa1 d1vloa1  
d1et9a1 d1esfa1 d2g9hd1 d4ohja1 d1klud1 d1bxta1 d1eu3a1 d1ty0a1  
d1fnua1 d2cqva1 d1fhga\_ d2k1ma\_ d2d12a1 d1biha3 d1biha1 d1biha4  
d3qp3a1 d1glca\_ d1gxea\_ d1cvsc2 d1cvsc1 d1xmwa2 d1m4ka2 d2otpa2  
d1biha2 d1rhfa2 d2fcba2 d2fcba1 d1wwbx\_ d1gsma2 d1lepfa1 d1lepfa2  
d2dava1 d1waaa\_ d1f97a2 d1x44a1 d1vcaa2 d1fnla2 d1fnla1 d3b5ha2  
d3h8na2 d3h8na1 d1bjba2 d1pd6a\_ d1f2qa2 d1f2qa1 d3cx2a\_ d1nbqa2  
d3b5ha1 d1n26a1 d1xiwb\_ d1xaua\_ d1fltx\_ d2ifga1 d1olla1 d1olla2  
d1cs6a4 d1cs6a3 d1cs6a2 d1cs6a1 d2gw5a2 d1sy6a1 d1xiwa\_ d1lucta2  
d1lucta1 d1ry7b2 d1gl4b\_ d1qz1a3 d1olza1 d2c9aa1 d1wwca\_

**Family-8 (a.25.1.2)**

**Positive dataset contains 11 protein sequences.**

d3q3ma\_ d1za0a1 d2inca\_ d2incb\_ d3hf1b\_ d2uw1a\_ d3n37a\_ d1syya\_  
d2o1za\_ d1uzra\_ d1smsa\_

**Negative dataset contains 4011 protein sequences.**

d1u08a\_ d1lc5a\_ d1b5pa\_ d2ay1a\_ d1bw0a\_ d3pd6a\_ d7aata\_ d2csta\_  
d1j32a\_ d1fg7a\_ d4wlha\_ d1o4sa\_ d1v2da\_ d1gdea\_ d1v72a1 d1svva\_  
d1ajsa\_ d1wsta1 d2f8ja2 d1l1k9a\_ d1vp4a1 d1xi9a1 d2gb3a1 d1yaaa\_  
d1xkla\_ d2wfla\_ d3i2ka1 d1lnsa3 d1mpxa2 d2cfba1 d1o69a\_ d1bj4a\_  
d3k28a\_ d2bwpa\_ d3lg0a\_ d2fnua\_ d3ou5a\_ d1z7da1 d1b9ha\_ d1iaya\_  
d4msoa\_ d1bs0a\_ d1s0aa\_ d1sffa\_ d3tqxa\_ d1mdoa\_ d3qboa\_ d3pgya\_  
d1bjna\_ d2dkja\_ d1ejia\_ d1vefa1 d4wxga\_ d3bs8a\_ d3gbxa1 d1w23a\_  
d2b5aa1 d2ofya1 d4mcxa\_ d2xi8a\_ d2icta\_ d2bnma1 d2ppxa1 d1y7ya1  
d1wioa4 d1ccza2 d1vcaa1 d1dr9a2 d1lic1a1 d2d9qb1 d2nxyb2 d1f56a\_  
d1bypa\_ d1azca\_ d1ws8a\_ d3u25a\_ d1cuoa\_ d1id2a\_ d2iaac\_ d4dp1x\_

d1nwpa\_ d2gima\_ d2i7sa\_ d1qhqa\_ d1gyca3 d1hfua2 d1kbva1 d1kbva2  
d1sdda1 d1sdda2 d1gyca2 d1mzya1 d2bw4a1 d1aoza1 d1aoza3 d1aoza2  
d1kyaa2 d1kyaa3 d1kyaa1 d1mzya2 d4e9sa1 d1sddb1 d1sddb2 d1hfua1  
d1hfua3 d1oe1a2 d1oe1a1 d1v10a2 d1v10a3 d1v10a1 d2dara2 d2dara1  
d1wyha2 d2dloa2 d1rutx4 d1rutx3 d2cuqa2 d1x41a2 d1x41a1 d1x3ha2  
d1x3ha1 d2d8za1 d1x61a2 d1x6aa1 d1x6aa2 d2cora2 d2cora1 d1v6ga1  
d1v6ga2 d2d8za2 d1x64a1 d1x64a2 d1b8ta1 d2co8a1 d1x63a2 d2dj7a2  
d2dj7a1 d2cu8a2 d2cu8a1 d1g47a2 d1g47a1 d1j2oa1 d1wyha1 d2dloa1  
d1wiga1 d1wiga2 d2cupa2 d2cupa3 d1x68a1 d2d8ya2 d2d8ya1 d1m3va2  
d1x62a1 d1x68a2 d1x61a1 d1b8ta3 d1b8ta2 d2d8xa2 d2d8xa1 d1x4ka1  
d1x4ka2 d2cuqa1 d1m3va1 d2co8a2 d1x63a1 d2cura1 d2cura2 d1x62a2  
d2w0pa\_ d2diaa1 d2e9ia2 d2e9ja1 d2dj4a1 d2eeba1 d2diba1 d2dmba1  
d2dmca1 d2d7oa1 d2ee6a1 d2d7pa1 d2eeaa1 d2di8a1 d1wlha1 d2d7na1  
d2nqca\_ d2d7ma1 d2dica1 d3cnka\_ d2k3ta1 d2eeca1 d1qfha1 d2bp3a1  
d1v05a\_ d2ee9a1 d2eeda1 d2di9a1 d2y5ia\_ d1qlsa\_ d1psra\_ d3n22a\_  
d2egda\_ d4ggfc\_ d2wcea\_ d2luca\_ d4aqia\_ d3nsia\_ d2lp3a\_ d1j55a\_  
d1a4pa\_ d1k8ua\_ d1nsha\_ d2bema\_ d1pama1 d1ea9c1 d1qhoa1 d2fhfa2  
d2fhfa1 d1k3ia1 d1j0ha1 d1cxlal d2bhua1 d1ledqa1 d1flsa2 d1ut9a2  
d1gvial d1txka1 d4alac\_ d1pjwa\_ d1rera1 d1s6na\_ d3uzqb\_ d2phla2  
d2phla1 d1fxza2 d1fxza1 d1lrha\_ d1uija1 g1dgw.1 d2v09a\_ d1uika2  
d1uika1 d1dgwa\_ d1ep0a\_ d2pa7a1 d1wlta1 d1nxma\_ d2c0za1 d1ds6b\_  
d1fstb\_ d1ju8a\_ d1v70a\_ d2f4pa1 d1yhfa1 d1tafa\_ d1bh9b\_ d1jfib\_  
d1q9ca\_ d1h3ob\_ d2byka1 d1n1ja\_ d4g92b\_ d1bh9a\_ d1jfia\_ d1h3oa\_  
d2bykb1 d1n1jb\_ d1h32a2 d2bjca1 d2hsga1 d1qpza1 d1efaa1 d1ydwa2  
d2nvwa2 d1h6da2 d1zh8a2 d1xeea2 d1t1ta2 d1ebfa2 d2ovga\_ d1sq8a\_  
d1rzsa\_ d3kz3a\_ d3orca\_ d3gpdg2 d2q49a2 d1hdgo2 d2g17a2 d2cvoa2  
d2czca1 d3pwka2 d1obfo2 d1i32a2 d1zyao2 d2pkqo2 d1b7go2 d2hjsa2  
d1cf2o2 d1vkna2 d1nvmb2 d2m9wa1 d3dfxa\_ d2msya\_ d2djoa1 d2r5za\_  
d1au7a1 d1f43a\_ d2lmda1 d1akhb\_ d1s7ea1 d3nara\_ d1zq3p1 d2craa1  
d1mija\_ d4uuta\_ d3a01a\_ d1x58a1 d3rkqa1 d3cmya1 d2cqxa1 d2da6a1  
d1e3oc1 d1fjla\_ d1mh3a1 d1ig7a\_ d1x41a1 d1wh7a1 d1gt0c1 d2mw8a\_  
d1lfup\_ d1x2ma1 d1b72a\_ d1wi3a1 d1jgga\_ d1wjha1 d1x2na1 d1mnmc\_  
d2cuea1 d3k2aa\_ d2hosa\_ d2jwta2 d1pufa\_ d1oact1 d2hi3a\_ d1b8ia\_  
d4j19a\_ d3lnqa\_ d1wh5a1 d1b8ib\_ d1fexa\_ d2cqra1 d1ug2a1 d2cqqa1  
d2ajea1 d4a69c\_ d1h8ac1 d2crga1 d2iw5b1 d1xc5a1 d1ofcx1 d2cu7a1  
d1wgxa1 d2cjja1 d2ckxa1 d1gvda\_ d6paxa1 d6paxa2 d1k78a2 d1xg1a1  
d1hlva1 d1iufa2 d1iufa1 d1b10a1 d1b10a2 d1d5ya1 d3lv8a\_ d1s3ga1  
d1zaka1 d1s4qa\_ d3tvta2 d1uf9a\_ d1khta\_ d1ckea\_ d1losna\_ d1p5zb\_  
d4tmka\_ d3cm0a\_ d1jaga\_ d3h86a\_ d1t0hb\_ d1nn5a\_ d2h92a\_ d3kb2a1  
d2c95a1 d1yj5a2 d1kgda\_ d1ly1a\_ d2ak3a1 d1vyva2 d1deka\_ d2grja1  
d1p3ja1 d1y63a\_ d1e4ya1 d1s96a\_ d3iija1 d1lvga\_ d1nksa\_ d1vyua2  
d4e22a\_ d1qf9a\_ d1jjva\_ d1q3ta\_ d1ki9a\_ d1lw7a2 d1teva\_ d1kjwa2  
d1gsia\_ d1g3ma\_ d1j99a\_ d1t8ta1 d1nsta\_ d1fmja\_ d1zrha\_ d1ls6a\_  
d2a3ra\_ d1aqua\_ d2zptx\_ d3ckla\_ d1texa\_ d1q44a\_ d2gwha\_ d1z0ja1

d3umra2 d3gj0a1 d2gaoa1 d1yzga1 d1x3sa1 d1g7sa4 d1puja\_ d1udxa2  
d1kk1a3 d2o52a\_ d1jwyb\_ d1zcaa2 d1zcba2 d2fv8a1 d2cjwa\_ d3dz8a1  
d1xzpa2 d1vg8a\_ d4qxaa\_ d2ew1a1 d1x1ra1 d2bcgy\_ d3doea1 d3cona\_  
d3rega\_ d3wyga\_ d1upta\_ d2b6ha1 d1zd9a1 d1r5ba3 d1n0ua2 d1r2qa\_  
d2f91a1 d2rhda\_ d3q3jb\_ d3q85a\_ d1efma1 d1r8qa\_ d2gf9a1 d2akab1  
d1ek0a\_ d1z08a1 d2gcoa1 d2dy1a2 d4g01b\_ d2cxxa1 d1svia\_ d3q72a\_  
d1ni3a1 d4ac9a4 d2erxa1 d2bmea\_ d1wxqa1 d2gf0a1 d4ldja1 d1zunb3  
d1d5ca\_ d4lv5b\_ d1efca3 d1kmqa\_ d2g6ba1 d3lrpa\_ d1tada2 d2y8ea\_  
d4rd4a1 d1z06a1 d2heia\_ d3a58b\_ d1u01a2 d1d2ea3 d1zj6a1 d2ocba\_  
d3rwoa\_ d1mr3f\_ d2e9sa1 d4u5xa1 d2iwra\_ d2fn4a1 d3bwdd\_ d2nzja1  
d2atva1 d2ksqa\_ d3l43a\_ d1mkya2 d1mkya1 d1wmsa\_ d1jnja3 d2rmka\_  
d1f6ba\_ d1f60a3 d1gota2 d1jala1 d2fh5b1 d1g16a\_ d2wblc\_ d1m7ba\_  
d1wf3a1 d1f5na2 d1t9ha2 d1z6xa1 d1z0aa1 d2fg5a1 d2a5ja1 d2bcjq2  
d1s0ua3 d1ky3a\_ d4y0va\_ d4lhwa\_ d2qmea1 d2atxa1 d1legaa1 d1ryha\_  
d1moza\_ d1nrjb\_ d2erya1 d3bfka\_ d1puia\_ d1fzqa\_ d3j3az1 d3t5ga\_  
d1shza2 d3defa\_ d2f7sa1 d3raba\_ d3tsoa\_ d3aq4a\_ d2a17a1 d3sfva1  
d3bc1a\_ d2ncda\_ d1sdma\_ d3h4sa1 d2heha\_ d2grya\_ g3kin.1 d1kk8a2  
d1br2a2 d1goja\_ d1f9va\_ d2mysa2 d1lkxa\_ d3t0qa\_ d4db1a1 d3gbja\_  
d1ry6a\_ d1v8ka\_ d1vava\_ d1luaia\_ d1y4wa1 d3vrda1 d3vrda2 d1fcdc2  
d1h1oa2 d1h1oa1 d1m70a2 d1m70a1 d1iqca2 d1iqca1 d1eb7a2 d1nmla2  
d1nmla1 d3h3no1 d3h3no2 d3ezwa2 d1zc6a1 d1zbsa1 d1zbsa2 d1zc6a2  
d2ch5a2 d2ch5a1 d1zxo2 d1zxo1 d2d0oa3 d2d0oa2 d1nbwa2 d1hroa\_  
d4gedb\_ d3zooa\_ d1mz4a\_ d1gu2a\_ d1f1fa\_ d1dvva\_ d1c6ra\_ d1c75a\_  
d1e29a\_ d1gdva\_ d1cnoa\_ d1h32b\_ d1co6a\_ d2bh4x\_ d2aiua\_ d5cytr\_  
d1jdl\_ d1i8oa\_ d2zboa\_ d3dmia\_ d1ls9a\_ d1wvec\_ d2yk3a\_ d3ph2b\_  
d1dw0a\_ d5aura\_ d1qn2a\_ d1f1ca\_ d4zzva\_ d2xspa\_ d1leg1a\_ d4v20a\_  
d1ojja\_ d4ipma1 d1gpia\_ d4csia\_ d3pfza\_ d3ovwa\_ d2yoka\_ d2nqya\_  
d1h4ga\_ d1hixa\_ d1oa2a\_ d1olra\_ d3b7ma\_ d4h7ma1 d3wp3a\_ d2vgda\_  
d1igoa\_ d3zsea\_ d2nlra\_ d3wx5a\_ d1oa3a\_ d1pvxa\_ d1m4wa\_ d1f5ja\_  
d1oa4a\_ d1ks5a\_ d4ix1a1 d1evsa\_ d1cnt1\_ d1pvhb\_ d1z7ca\_ d1huwa\_  
d1rhga\_ d1f6fa\_ d1f45b\_ d1ilrb\_ d1axia\_ d1letea\_ d3tgxb\_ d1scfa\_  
d2z3qa1 d3qb1a\_ d1hula\_ d1m48a\_ d4nkqb\_ d1eera\_ d1v7mv\_ d5e4ea\_  
d2o27a\_ d3b5ka\_ d2psma1 d4zf7a\_ d3uf5a\_ d4x51a\_ d1d9ca\_ d4ypgc1  
d3oq3a\_ d1lqsl\_ d1n1fa\_ d1aula\_ d1wu3i\_ d3bes1\_ d3ux9a\_ d2b71a\_  
d3rbaa\_ d2qtra\_ d1nupa\_ d3l92a\_ d1f9aa\_ d1qjca\_ d2h29a\_ d1vlha\_  
d1od6a\_ d1lw7a1 d4ruka\_ d2e17a\_ d1iq0a2 d1irxa2 d1r6ta2 d1ivsa4  
d2cyba\_ d1rqga2 d1j09a2 d2yxna\_ d1f7ua2 d1h3fa1 d1ffya3 d2g36a1  
d1nzja\_ d1jila\_ d1n31a\_ d1i61a\_ d1pfva2 d1h3na3 d3n9ia\_ d3sz3a1  
d3sw2a\_ d1moxc\_ d1dx5i3 d1edmb\_ d1aut12 d1aut11 d1nqlb\_ d1dva11  
d1szba2 d1kigl\_ d2y5f1\_ d1ijqa2 d1gk5a\_ d1g1sa2 d1nt0a3 d1xdtr\_  
d1lmja2 d1lmja1 d1nzia2 d2wphe\_ d1klil\_ d1pfx12 d1pfx11 d1p9ja\_  
d1g1ta2 d1f7ea\_ d4yzub\_ d2mgpa1 d1b9wa1 d1b9wa2 d2mgpa2 d1ob1c1  
d1ob1c2 d1n1ia2 d1n1ia1 d2npra2 d2npra1 d1s5ja2 d1qhta2 d4dlea2  
d1tgoa2 d3py8a2 d1q8ia2 d2py5a2 d1d5aa2 d1pvaa\_ d3fs7a\_ d2pvba\_

d1ttxa\_ d1rwya\_ d2kyfa\_ d1rk9a\_ d1a75a\_ d1exra\_ d1tiza1 d1nyaa\_  
d1g8ia\_ d1ggwa\_ d1wdcc\_ d3fwba\_ d1ggza\_ d2o5ga\_ d1ctaa\_ d1m45a\_  
d3i5gc\_ d1sl8a\_ d1fpwa\_ d2scpa\_ d2roaa\_ d4aqra\_ d3pn7b\_ d1br1b\_  
d1s6ca\_ d1bjfa\_ d2obha\_ d1jfk\_ d1j0a\_ d1qv0a\_ d1lkja\_ d2mlfc\_  
d2m97a\_ d2d8na\_ d4by5a\_ d1jbaa\_ d4nqga\_ d1wdcb\_ d2mysc\_ d1j7qa\_  
d1s6ia\_ d1uhka2 d1r2ua\_ d1dtla\_ d3kf9a\_ d3pn7c\_ d1qjta\_ d1fi6a\_  
d1gjya\_ d1ylxa\_ d1hqva\_ d1dvia\_ d1qxp2 d4usla\_ d1k94a\_ d3h33a\_  
d1rwja\_ d19hca\_ d1os6a\_ d3bxua\_ d3h4na\_ d1i77a\_ d3caoa\_ d1j0pa\_  
d2ctha\_ d1duwa\_ d1ofwa\_ d2e84a\_ d1hh5a\_ d1gyoa\_ d3h34a\_ d1wkya2  
d1uuqa\_ d3wh9a\_ d4m1ra\_ d1xyza\_ d4xuya\_ d2je8a5 d4bf7a1 d3cuia\_  
d1ur4a\_ d1qw9a2 d1odza\_ d2vzsa5 d1bqca\_ d2x2ya1 d1hjqa\_ d1qnra\_  
d4y7ea1 d1vjza\_ d4k68a\_ d2v3ga\_ d4hpga\_ d1nofa2 d1nq6a\_ d1h4pa\_  
d1aq0a\_ d3ziza\_ d4bs0a\_ d1ecea\_ d1h1na\_ d1ta3b\_ d1w91a2 d1l1wa\_  
d1uhva2 d1us3a2 d1legza\_ d7a3ha\_ d1tvna1 d3nyda1 d1ghsa\_ d2cyga1  
d4xv0a\_ d2c8na2 d1w32a\_ d3emca\_ d1v6ya1 d1foba\_ d2uwfa1 d2fgla\_  
d3niya1 d2c0ha1 d1rh9a1 d1yq2a5 d1szna2 d1fa2a\_ d1pama4 d5do8a1  
d1ea9c3 d2fhfa5 d1qhoa4 d1avaa2 d1m53a2 d4m8ua1 d2gjpa2 d1lwha2  
d4howa1 d1ktba2 d1j0ha3 d3vm5a1 d2x1ia\_ d1wzaa2 d1uasa2 d2diea1  
d1mxga2 d1ht6a2 d1eswa\_ d1liv8a2 d5cpsa\_ d1ud2a2 d1zjaa1 d3gbea1  
d1kwga2 d1wdpa\_ d1gcya2 d1g5aa2 d1hvxa2 d3dhp2 d2bhua3 d4do4a1  
d3qgva1 d1e43a2 d1g94a2 d2d3na2 d1gjwa2 d1gvia3 d1x1na1 d1r7aa2  
d1tz7a1 d4toqa\_ d1wb0a1 d1w9pa1 d1eoka\_ d1itxa1 d1kfwa1 d1goia2  
d1ledqa2 d2gsja\_ d1hjxa1 d1jnda1 d1vf8a1 d3wdpp1 d3wq5a\_ d1gnxa\_  
d4gxpa\_ d4hz8a\_ d1e4mm\_ d3aiua\_ d1wcga1 d1qvba\_ d3ahxa\_ d1v02a\_  
d2dgaa\_ d1pbga\_ d1vffa1 d4ha4a\_ d1mixa2 d1e5wa2 d1j19a2 d1isna2  
d2a16b2 d3syxa1 d1mkea1 d2p8va\_ d1xoda1 d1i7aa\_ d1evha\_ d1qc6a\_  
d1x14a1 d3vsqa\_ d2gixa1 d1p7ba1 d2v76a\_ d1wj1a1 d1aqca\_ d1qqga2  
d1ntva\_ d1n3ha\_ d4dbba\_ d3f0wa1 d1p3ra\_ d1wgua1 d2cy4a1 d3hqca\_  
d1wvha1 d1xr0b1 d1wgqa1 d1v89a1 d2coda1 d1zc3b\_ d1wg7a1 d1u5ea1  
d1v61a1 d2coca1 d2ys1a1 d1v5pa1 d1nty2 d1wjma1 d1wi1a1 d1u29a\_  
d1xx0a1 d1unqa\_ d2zkmx3 d1fhoa\_ d1v88a1 d2adza1 d1x1fa1 d1p6sa\_  
d2coaa1 d1btka\_ d1v5ma1 d1faoa\_ d2x18a\_ d1dyna\_ d1x1ga1 d4kaxb\_  
d2j59m1 d1xcga2 d1txda2 d1u5da1 d1dbha2 d1w1ha\_ d1upqa\_ d1v5ua1  
d1foea2 d2fj1a1 d1eaza\_ d2dfka2 d2cofa1 d1kz7a2 d9ldta1 d2ewda3  
d1up7a1 d2dfda1 d1s6ya1 d1vjta1 d7mdha1 d1hyea1 d1t2da1 d1ojsa3  
d1b8pa1 d1ldna1 d1hyha1 d1civa1 d2a92a1 d1ez4a1 d1i0za1 d1y6ja1  
d1gv0a1 d1ur5a1 d1llda1 d1obba1 d1v8ba1 d1gdha1 d1l7da1 d2dlda1  
d1mx3a1 d1ygya1 d1qp8a1 d1li4a1 d1j4aa1 d2naca1 d1npya1 d3t4ea2  
d1a4ia1 d1o0sa1 d2hk9a2 d2egga2 d1b26a1 d1bvua1 d1gg2a1 d1c1da1  
d1leha1 d1gtma1 d1euzal d1nvtal d3dona2 d1edza1 d1gpja2 d1p77a1  
d1nyta1 d1b0aa1 d1vl6a1 d1v91a1 d1txga2 d3f47a1 d1mv8a2 d2pv7a2  
d1xc2a3 d2ahra2 d4xiya1 d2f1ka2 d1pgja2 d1i36a2 d1np3a2 d1lj8a4  
d1teaa3 d1qmga2 d2i76a2 d2g5ca2 d1wdka3 d1dlja2 d3cuma3 d1kola2  
d1f8fa2 d1qora2 d1jqba2 d1vj0a2 d1cdoa2 d1gu7a2 d1d1ta2 d1xa0a2

d2dm6a2 d1jvba2 d1rjwa2 d1llua2 d1h2ba2 d1tt7a2 d1piwa2 d1o89a2  
d1iz0a2 d1e3ja2 d1yb5a2 d1uufa2 d1vj1a2 d1e3ia2 d3gpdg1 d1vc2a1  
d2nvwa1 d1u8fo1 d1ydwa1 d1hdgo1 d2g17a1 d1cf2o1 d2czca2 d1r0ka2  
d1obfo1 d2cvoa1 d1ebfa1 d1h6da1 d1i32a1 d1zh8a1 d2q49a1 d1qkia1  
d1j5pa4 d3pzra1 d1xeaa1 d1vkoa1 d1vm6a3 d3qvsa1 d2pkqo1 d1b7go1  
d1gr0a1 d1p1ja1 d1lc0a1 d1j0xo1 d3pwka1 d2hjsa1 d1zyao1 d1vkna1  
d1tlta1 d1nvmb1 d3sjua\_ d3ojfa1 d1xu9a1 d2jjya1 d1n7ha\_ d1y1pa1  
d1h5qa\_ d1jtva\_ d4fs3a\_ d2bkaa1 d1gy8a\_ d2c5aa1 d1ulsa\_ d1ooea\_  
d2b69a1 d1y5ma1 d1spxa\_ d1aela\_ d1bxka\_ d1ydea1 d1gega\_ d1hdoa\_  
d1o5ia\_ d1e6ua\_ d1snya1 d2rhca\_ d3zv4a\_ d5ceja\_ d2d1ya1 d1fjha\_  
d3w8ea\_ d2fmua1 d1x1ta\_ d1rpna\_ d3ay7a1 d1k2wa\_ d1eq2a\_ d2hrba1  
d3ruaa\_ d2ew8a1 d4hwka\_ d1xgka\_ d2bd0a1 d1yo6a1 d2a35a1 d2ntva\_  
d1vl8a\_ d1hdca\_ d4bkua\_ d2ag5a1 d2q45a\_ d1nffa\_ d4iy1a\_ d1zbqa1  
d1kewa\_ d1ek6a\_ d1ja9a\_ d2q46a2 d1iy8a\_ d1cyda\_ d2ptga\_ d1hxha\_  
d1uzma1 d3lyla\_ d4m89a\_ d3wyea\_ d2b11a1 d1w6ua\_ d1sb8a\_ d2q2va\_  
d4nr0a\_ d1e6wa\_ d2gasa\_ d3oiga1 d2bgka1 d1mxha\_ d1vl0a1 d1rkxa\_  
d1r6da\_ d1wmaa1 d1e7wa\_ d2c07a1 d1xkqa\_ d3tzha\_ d1g0oa\_ d3lz6a\_  
d1qyca\_ d1ledoa\_ d1gz6a\_ d1oc2a\_ d1t2aa\_ d1zema1 d2xoxa\_ d1z45a2  
d1geea\_ d1p33a\_ d31t0a\_ d4e6pa\_ d2wyua\_ d1db3a\_ d4q9na\_ d1xhla\_  
d4o1ma\_ d1fmca\_ d2uvda\_ d2gdza1 d1uaya\_ d2z1ma\_ d2o23a2 d2fr1a2  
d2fr1a1 d1qsga\_ d1qyda\_ d4zjua\_ d2a4ka1 d1yb1a\_ d1wvga1 d1yxma1  
d3f4ba\_ d1mg5a\_ d1xg5a1 d1r55a1 d3gboa\_ d1atla\_ d1kufa\_ d1buda\_  
d4q11a\_ d1quaa\_ d1yp1a\_ d1wnia\_ d3nqyb\_ d4gera\_ d1bqba\_ d1xd3a\_  
d3ifwa\_ d1mdwa\_ d1ziva1 d1zcma1 d1t3ca\_ d1epwa3 d2a97a\_ d3fiea\_  
g1elh.1 d3ioqa\_ d1fh0a\_ d1o0ea\_ d1khqa\_ d1m6da\_ d2cb5a\_ d1cs8a\_  
g8pch.1 d1s4va\_ d2pnsa\_ d1vsna1 d1mira\_ d1iwda\_ d2oula\_ d7pcka\_  
d3bwka\_ d3bcna\_ d2p86a\_ d1pvja\_ d1pcia\_ d1gece\_ d1deua\_ d4bs6a\_  
d1xkga1 d1cqda\_ d1jqpa2 d2c0ya\_ d2bdza\_ d3p5ua\_ d1zoya1 d1qo8a2  
d1d4ca2 d1chua2 d1kf6a2 d2jk6a2 d2jk6a1 d1feca1 d1feca2 d1lpfa1  
d1lpfa2 d1xhca1 d1xhca2 d1dx1a2 d1dx1a1 d1gera2 d1m6ia2 d1onfa1  
d1onfa2 d3lada2 d3lada1 d1w4xa1 d1w4xa2 d1gesa2 d1mo9a1 d1xdia1  
d1fl2a2 d1fl2a1 d1fcda1 d1fcda2 d1h6va2 d1h6va1 d1mo9a2 d1gv4a2  
d1gv4a1 d2gv8a2 d2gv8a1 d1aoga1 d1aoga2 d1hyua1 d1ebda1 d1ebda2  
d3dk9a1 d1q1ra2 d1q1ra1 d1gesa1 d1g4ma1 d1g4ma2 d1ps9a2 d1o94a2  
d1cjca1 d1pn0a1 d1reoal d1ju2a1 d2f5va1 d3c96a1 d2gmha1 d1pj5a2  
d1gpea1 d1o5wa1 d1n4wa1 d1k0ia1 d2dw4a2 d2ivda1 d2voua1 d1kdga1  
d1s5ja1 d2hbja2 d2igia\_ d1wlja\_ d1qhta1 d4dlea1 d1tgoa1 d2f96a1  
d3tr8a1 d3mxma\_ d1q8ia1 d1y97a1 d1w0ha\_ d2py5a1 d1noya\_ d1d5aa1  
d1yt3a3 d2guia\_ d3mwpal d4kb1a\_ d1js9c\_ d1f15b\_ d1za7a\_ d1laja\_  
d1iuka\_ d2csua1 d3q9ub\_ d2yv1a1 d3q9na\_ d2d59a\_ d2yv2a1 d1euca1  
d1y81a1 d1k8ka2 d1k8ka1 d3uleb1 d3i33a2 d3i33a1 d1bupa1 d1dkgd2  
d1dkgd1 d4ci6a2 d1jcfa1 d4a2ba2 d2fxua1 d1yaga2 d1yaga1 d4cbua2  
d1bupa2 d1r7ha\_ d1faaa\_ d1wika1 d1xfla\_ d1ttza1 d2f51a1 d1ti3a\_  
d1nhoa\_ d1sena\_ d2i4aa\_ d1ep7a\_ d1zmaa1 d1fo5a\_ d3lefa1 d3diea1

d2yana1 d1z6na1 d1oaza\_ d3zywa1 d4aj8a\_ d1nm3a1 d4fiwa\_ d1wmja\_  
d4hs1a1 d1liloa\_ d1xwaa1 d1wjka1 d2vmla\_ d1fb6a\_ d1gh2a\_ d1h75a\_  
d1nw2a\_ d1kx5b\_ d3a6na\_ d4m6ba2 d2nqbd\_ d3wkjd\_ d2yfwe\_ d4h9na\_  
d5bnxa\_ d1kx5c\_ d3r45a\_ d1eqzb\_ d4jjnb\_ d1f66c\_ d1eqza\_ d4wnnb\_  
d1kx5a\_ d1u35c1 d1id3a\_ d2nqbc\_ d1ku5a\_ d1f1ea\_ d1b67a\_ d2b5ea2  
d2b5ea3 d2b5ea1 d2b5ea4 d2kp1a1 d2kp2a1 d1hyua3 d1hyua4 d1j08a2  
d1pd212 d1nhya2 d2a2ra2 d1k0dd2 d1f2ea2 d1gsua2 d1f3ba2 d2fhea2  
d2pvqa1 d1tw9a2 d1oyja2 d1e6ba2 d1k0ma2 d3ik7a1 d4is0a1 d1r5aa2  
d1jlva2 d1m0ua2 d3gtub2 d1z9ha2 d1okta2 d1axda2 d2gsra2 d1tu7a2  
d1k3ya2 d1zagma1 d1gnwa2 d1gwca2 d2gsta2 d1glqa2 d1oe8a2 d1pn9a2  
d1v2aa2 d1fw1a2 d1duga2 d3h1jd1 d3wyha\_ d4g9sa1 d3gxra\_ d1qqya\_  
d1gd6a\_ d1f6ra\_ d1ivma\_ d2gv0a\_ d1iiza\_ d2z2fa\_ d1j8xa\_ d1gh1a\_  
d1b9oa\_ d1741a\_ d1691a\_ d2o4wa\_ d1p37a\_ d1k28a3 d1xjta1 d1jtma\_  
d2f2qa\_ d4e97a1 d2pjsa1 d1k11a\_ d2i7ra1 d1ecsa\_ d1xqaa1 d5cj3a1  
d1npba\_ d1jifa\_ d2p7oa\_ d1nkia\_ d1mpya2 d1kw3b2 d1kw3b1 d4ghga1  
d1tfza1 d3isqa1 d3isqa2 d1sqia1 d1sqia2 d1lkda2 d1lkda1 d1mpya1  
d1cjxa2 d1cjxa1 d1sp9b2 d1t47a1 d1t47a2 d1sp8a1 d1sp8a2 d1flua1  
d1pv8a\_ d1w5qa\_ d2c1ha\_ d1ohla\_ d1l6sa\_ d1qsta\_ d2beia1 d4m3sa\_  
d1u6ma1 d1ygha\_ d1yk3a1 d3dr6a\_ d1xmta\_ d1z4ea1 d2ge3a1 d1bo4a\_  
d2fiaa1 d2jdca1 d1y9wa1 d3to7a\_ d1wwza1 d2fl4a1 d2ozua1 d2b5ga\_  
d2cy2a1 d2p0wa\_ d1cm0a\_ d4pswa\_ d1yrea1 d1yr0a1 d1m4ia\_ d2gana1  
d1yvka1 d1ghea\_ d2g3aa1 d1y7ra1 d2euia1 d1q2ya\_ d2fsra1 d1xeba\_  
d2ae6a1 d1qsma\_ d2aj6a1 d1y9ka1 d1i12a\_ d1vkca\_ d2atra1 d1n71a\_  
d2d4pa1 d2fiwa1 d2fe7a1 d1tiqa1 d2ou2a\_ d1yx0a1 d2fcka1 d1p0ha\_  
d2j8ma\_ d2pq8a\_ d1z4ra1 d1s3za1 d1ufha\_ d1f37b\_ d1xvqa1 d1pn0a2  
d3hy2a\_ d2cvba1 d1o8xa\_ d1lu4a\_ d1we0a1 d2bmx1 d2a4va1 d1psqa\_  
d1xiya1 d1q98a\_ d1n8ja\_ d1zofa1 d2ggta\_ d3tjja\_ d4je1a1 d1o73a\_  
d3s9fa\_ d2zcta\_ d1qmva\_ d2b1ka\_ d5dvba1 d2b5xa1 d2v2ga\_ d1st9a\_  
d3tb2a\_ d411ra\_ d4fh8a1 d1e2ya\_ d1knga\_ d2h30a\_ d1i5ga\_ d2z9sa\_  
d2f8aa1 d1tp9a1 d2b7ka\_ d1nm3a2 d3hvva\_ d2wfca1 d4kcea\_ d1xvwa1  
d4gqca1 d3qpma\_ d4k1fa\_ d1zzoa1 d1gp1a\_ d1prxa\_ d2m5ta\_ d1cqqa\_  
d1wqsa\_ d5bpea\_ d2ipha\_ d1lvoa\_ d2bhga1 d3tnta\_ d3sjia\_ d3d23a1  
d2fyqa\_ d3tloa\_ d3zvea1 d2hrva\_ d3q3ya1 d4asha1 d1jgta2 d1ofda3  
d1ea0a3 d1ecfa2 d1q15a2 d1ct9a2 d1te5a\_ d1ra6a\_ d1muka\_ d3gsza\_  
d1khva\_ d1te9a\_ d2xwha\_ d3uqsa\_ d3hkwa\_ d3n6ma\_ d2cjqa\_ d2xyma\_  
d1teba\_ d1te8a\_ d1s48a\_ d1u09a1 d4wfxa\_ d3tyqa\_ d2pgga1 d1lgya\_  
d4l3wa\_ d111fa\_ d1gz7a\_ d1ukca\_ d1c4xa\_ d2rhwa\_ d3groa\_ d1pjaa\_  
d1ei9a\_ d2ftba\_ d1pmpa\_ d2rcqa1 d1fdqa\_ d4l1kpa\_ d1sa8a\_ d1vyfa\_  
d1lpja\_ d3vg7a1 d4azqa1 d1o8va\_ d5bvqa\_ d1p6pa\_ d2qo4a\_ d1opba\_  
d1yiva1 d1o1va\_ d4bvma1 d4tkba\_ d4i3ba\_ d1bwya\_ d1ftpa\_ d1ggla\_  
d4gkca\_ d1cbia\_ d3p6da1 d1kqwa\_ d2a0aa1 d3zxha\_ d1cgla\_ d1rm8a\_  
d1eaka2 d1hy7a\_ d2jsda\_ d1hv5a\_ d1i76a\_ d1g12a\_ d3p0ya1 d1lgra1  
d1lgra2 d1n8yc2 d1m6ba2 d1m6ba1 d1m41a\_ d2bk7a\_ d3fjua\_ d1z5ra1  
d1kwma1 d1uwya2 d1jqga1 d2c1ca1 d1dtda\_ d1h81a2 d2tbvc\_ d1c8nc\_

d1x36a\_ d1smvc\_ d1ng0c\_ d4sbvc\_ d1lopa\_ d1f2nc\_ d1cixa\_ d1y29a\_  
d1v7fa\_ d2jtba\_ d1d1ha\_ d1g9pa\_ d1lupa\_ d1qk7a\_ d1mb6a\_ d2a2va\_  
d1niya\_ d1i25a\_ d1hvwa\_ d2mpqa\_ d1ie6a\_ d1kqha\_ d1la4a\_ d2mxoa1  
d1d10a\_ d1koza\_ d1qk6a\_ d1emxa\_ d1lqra\_ d1c6wa\_ d1rmka\_ d1ixta\_  
d1eyoa\_ d1cna\_ d1fu3a\_ d1g1pa\_ d1f3ka\_ d1rypd\_ d1lrua\_ d1rypc\_  
d3unfk\_ d1rypa\_ d1j2pa\_ d1lirui\_ d1j2qh\_ d3unfh\_ d1m4ya\_ d1rypb\_  
d1lirul\_ d1lirug\_ d1liru2\_ d1q5rh\_ d1rypg\_ d1g3ka\_ d1q5qa\_ d1e94a\_  
d1lirub\_ d1ryph\_ d3ty6a\_ d1liruj\_ d1liruk\_ d1rype\_ d1lirud\_ d1lirue\_  
d3mi01\_ d1rypf\_ d1liruh\_ d2z3ba\_ d1liruc\_ d3mka2\_ d1lirul\_ d1mqta\_  
d1d4m3\_ d1fmd3\_ d2mev1\_ g1aym.1 d1ev13\_ d4q4w1\_ d1r1a3\_ d2x5ia\_  
g1r1a.1 g1d4m.1 g1rhi.1 d1b35b\_ d1loopa\_ d1tme1\_ d4iv1a\_ g1pvc.1  
g1fpn.1 d1fpn1\_ d4gb31\_ d1d4m1\_ d1fmd1\_ d1ev11\_ d2wzr3\_ g1cov.1  
d1qqp3\_ g1fmd.1 d2x5ic\_ d1rhi3\_ g1oop.1 d1hxs1\_ g1hxs.1 d1fpn3\_  
d1bev1\_ g2mev.1 d1eah3\_ d1aym1\_ d1pvc3\_ d1qqp1\_ d1zba3\_ d1h8ta\_  
d3vbhc\_ g1b35.1 g1bev.1 d1hxs3\_ g1ev1.1 d1bev3\_ g1tmf.1 d1tmf1\_  
d1b35a\_ d2mev3\_ g1eah.1 g1h8t.1 d1eah1\_ d4q4w3\_ d1r1a1\_ d1aym3\_  
d1pvc1\_ d1zba1\_ d1h8tc\_ d1oopc\_ d1tme3\_ g1qqp.1 d4iv1c\_ g1tme.1  
d3ubub\_ d1legia\_ d1v7pa\_ d1tdqb\_ d3ubua\_ d1c3ab\_ d1h8ua\_ d3bx4b\_  
d1t8ca1 d1sb2a1 d1qdda\_ d2ziba1 d3cada\_ d1byfa\_ d1j34b\_ d1jwia\_  
d1jzna\_ d1c3aa\_ d1oz7b\_ d1wmza\_ d3bdwb\_ d1hq8a\_ d1fifa1 d1dv8a\_  
d3hupa\_ d1wk1a1 d1umra\_ d2afpa\_ d3bx4a\_ d1gz2a\_ d1sl6a\_ d1v7pb\_  
d3g8ka\_ d1ixxa\_ d1j34a\_ d1jwib\_ d1g1sa1 d1y17a1 d1ja3a\_ d1fvub\_  
d3bdwa\_ d1sb2b1 d1fvua\_ d1umrc\_ d1oz7a\_ d4m17a\_ d3cfwa1 d1ypqa1  
d1g1ta1 d3fd4a\_ d3l9jc\_ d4dn8a1 d1v41b\_ d1rd11\_ d2msba\_ d3exra\_  
d2ffca1 d2fdsa1 d3n3ma1 d2czda\_ d1q6oa\_ d2yyua\_ d1vqta1 d1dbta\_  
d3ldva1 d2flia1 d1rpxa\_ d1tqja\_ d1tqxa\_ d4lt9a1 d3tc7a1 d3hoja\_  
d1i4na\_ d3vnda\_ d3n18a1 d1geqa\_ d3naval d1v5xa\_ d4a2ra1 d3tc6a1  
d1ujpa\_ d4ijba\_ d1xcfa\_ d1vc4a\_ d1rd5a\_ d1qopa\_ d3b5va\_ d2r80b\_  
d1cqxa1 d1cg5a\_ d1gcvb\_ d3boma\_ d2h8fb\_ d2raoa\_ d3bj1a\_ d4hrrb\_  
d2r50a\_ d3d1kb\_ d2aa1b1 d3zhwa\_ d3hf4b\_ d3gdja\_ d1jebb\_ d3bj1b\_  
d1x9fb\_ d1wmub\_ d1gcva\_ d3bcqb\_ d3d4xb\_ d1gvha1 d2dc3a\_ d3hf4a\_  
d4yu3a\_ d3k8ba\_ d1qpwb\_ d2r80a\_ d3bcqa\_ d1v4wa\_ d3wtgb\_ d1jl7a\_  
d4esaa\_ d3d1ab\_ d1fsla\_ d4h21a\_ d1v4wb\_ d1mwca\_ d1vhba\_ d1jeba\_  
d1spgb\_ d1h97a\_ d1q1fa\_ d1tu9a1 d3d1aa\_ d1hdsb\_ d3hyub\_ d2zfb\_ b\_  
d3fs4a\_ d1oj6a\_ d1shrb\_ d4h21b\_ d4yu3b\_ d1spga\_ d3hrwa\_ d3qqra\_  
d3at5a\_ d4wchd\_ d3hyua\_ d1cg5b\_ d1uc3a\_ d1hbra\_ d2raob\_ d1outb\_  
d4esab\_ d3gdjb\_ d3qqqa\_ d1x9fc\_ d3vrf\_ a\_ d1itha\_ d3mkba\_ d3d4xa\_  
d3mjpa\_ d1jl6a\_ d3fh9a\_ d1outa\_ d2dc3b\_ d1it2a\_ d3eoka\_ d3g46a\_  
d1qpwa\_ d3vrfb\_ d1ch4a\_ d1x9fd\_ d1hdsa\_ d2zfba\_ d3mkbb\_ d1or4a\_  
d3wtga\_ d1a4fa\_ d3fh9b\_ d3bomb\_ d3cy5a\_ d3at5b\_ d1x9fa\_ d2oifa\_  
d4lmb\_ b\_ d1cpcb\_ d3v57a\_ d1kn1a\_ d1cpca\_ d4f0ta\_ d2vjha\_ d4po5b\_  
d1eyxa\_ d1alla\_ d4f0tb\_ d1b33b\_ d1b8db\_ d4h0mb\_ d1b33a\_ d2vjhb\_  
d4lmb\_ b\_ d2vmlb\_ d1allb\_ d2vjta\_ d3dbja\_ d2vmla\_ d2vjtb\_ d4f0ub\_  
d1f99b\_ d4rmpa1 d1liaa\_ d1eyxb\_ d2uulb\_ d4lmsb\_ d4f0ua\_ d2bv8a\_

d1f99a\_ d2bv8b\_ d2c71b\_ d3dbjb\_ d4rmpb1 d1b8da\_ d4h0ma\_ d3v57b\_  
d1kn1b\_ d1liab\_ d2uula\_ d2j96a\_ g1gxs.1 d1hlga\_ d2xqfa\_ d1ea5a\_  
d1f6wa\_ d1dx4a\_ d1k4ya\_ d4qwwa\_ d2ha2a\_ d1r88a\_ d1sfra\_ d4qeka\_  
d3c8da2 d2pbla1 d1jkma\_ d1lzla\_ d1jjfa\_ d1gl9b1 d1gkub2 d1jmx2  
d1pbya1 d1pbya2 d1b9ra\_ d1offa\_ d1frra\_ d3wcqa\_ d1e9ma\_ d1wria\_  
d1i7ha\_ d3av8a\_ d1czpa\_ d1rfka\_ d3p1ma1 d3b2ga\_ d2bt6a2 d1xm5a\_  
d1xaxa\_ d1tvia\_ d4iuaa3 d4bvva\_ d5hpga\_ d3k65a\_ d1ki0a3 d1ki0a2  
d1ki0a1 d1a0ha1 d1pmla\_ d3sp8a3 d2feba1 d1gvfa\_ d3qm3a1 d2fjka\_  
d1f74a\_ d3l21a\_ d2e1da\_ d1to3a1 d1w3ia\_ d1sfla\_ d1n7ka\_ d1vcva1  
d4imea\_ d1wa3a\_ d2ocza1 d1f2ja\_ d3m16a\_ d2yxga\_ d1ub3a\_ d3a5fa\_  
d1fbaa\_ d1l6wa\_ d1xfba1 d1wx0a1 d1vpxa1 d1ojxa\_ d1mxsa\_ d2a4aa1  
d1xkya1 d3cq0a1 d3s1xa\_ d1f05a\_ d1fdja\_ d3cpra1 d4d2ja\_ d1e88a1  
d1l6ja5 d1l6ja4 d1eaka4 d1eaka3 d1l6ja3 d1h8pa2 d1h8pa1 d3rp2a\_  
g1lucy.1 d1fuja\_ d2zchp\_ d3w94a\_ d1si5h\_ d1lo6a\_ g2pka.1 d1cgha\_  
d1kigh\_ d1a5ia\_ d3s9ba\_ d1hj8a\_ d1ao5a\_ d2anya\_ d1q3xa1 d1gvza\_  
d1azza\_ d4gsoa\_ d2f91a1 d1liaua\_ d1gdna\_ d1eufa\_ g1fiw.1 d1eq9a\_  
d4nfea\_ d2rdla\_ d1spja\_ d1elva1 d1a7sa\_ d1ekbb\_ d1pfxc\_ d1yc0a\_  
d2aiqa\_ g1fiz.1 d1fi8a\_ d4k60a\_ d4dgja\_ d1mzaa\_ d1lop0a\_ d3tjva\_  
d1pytd\_ d1sgfg\_ g1gg6.1 d2eeka\_ g1rtf.1 d1a0ja\_ d3g01a\_ d1pytc\_  
d4e7na\_ d1ddja\_ d1z8ga1 d2hlca\_ d1npma\_ d1brup\_ g1jou.1 d1sgfa\_  
d1autc\_ g2hnt.1 g1kdq.1 d3s69a\_ d4crga\_ d1fxya\_ d1bqya\_ d1svpa\_  
d3su6a1 d1cula1 d4agka\_ d1vcpa\_ d1q31a\_ g1n11.1 d3e90b\_ d1ep5a\_  
d3u1jb\_ d1dzka\_ d4tlja\_ d2a2ua\_ d4wfva\_ d3t1da\_ d4iaxa\_ d3zq3a\_  
d2nnda\_ d1i4ua\_ d1kxoa\_ d1bbpa\_ d1kt7a\_ d1exsa\_ d3s26a1 d1lf7a\_  
d1qfta\_ d4gh7a\_ d1z24a1 d1qabe\_ d1xkia\_ d1ew3a\_ d3bx7a\_ d4iawa1  
d1n0sa\_ d1gkab\_ d3kzaa\_ d2k23a\_ d2l9ca1 d2joza1 d1gm6a\_ d3kffa\_  
d3saoa1 d1e5pa\_ d1yupa1 d1iiua\_ d3lgia\_ d3i77a\_ d2z9ia2 d4nsva\_  
d1lcya2 d4jcna\_ d1agja\_ d1os8a\_ d1hpga\_ d1p3ca\_ d1l1ja\_ d1qtfa\_  
d1e69a\_ d1mv5a\_ d3g60a4 g1ii8.1 d1ewqa2 d1ji0a\_ d1qhla\_ d1v43a3  
d2wmfa1 d1vpla\_ d1g2912 d4a82a2 g1f2t.1 d2d62a1 d3tuic1 d2bbsa1  
d3g60a3 d2ixea\_ d1g6ha\_ d1sgwa1 d2qi9c\_ d3rlfa1 d3b60a1 d3d31a2  
d2pzea1 g1xew.1 d1jj7a\_ d1oxk2 d2onka1 d1w1wa\_ d1qf5a\_ d1vmaa2  
d1nija1 d1np6a\_ d2p67a1 d3ihla\_ d1okkd2 d1ls1a2 d1slma2 d1liona\_  
d2v40a\_ d1dj3a\_ d3hida\_ d2vola1 d2g0ta1 d1vcoa2 d1j8mf2 d1g3qa\_  
d1xjca\_ d1p9ba\_ d1qzxa3 d1ihua2 d1ihua1 d2qm8a\_ d1dj2a\_ d4ioja\_  
d1cp2a\_ d1yrba2 d1hyqa\_ d3gqba2 d1skye3 d1xp8a1 d1tf7a2 d1tf7a1  
d1ye8a1 d1skyb3 d2qe7d2 d4blta\_ d4huta\_ d3l1daa2 d4hyya\_ d2i3ba1  
d1cr1a\_ d3j9tb2 d3ntua2 d1vdza1 d2z43a\_ d1e9ra\_ d1nlfa\_ d3ziaa2  
d1n0wa\_ d1g6oa\_ d3ziad2 d3j9ta2 d1pzna2 d3gqbb2 d2i49a\_ d1nnfa\_  
d1xvxa\_ d1ursa\_ d1h3da1 d1iuda\_ d4m1va1 d1twya\_ d3e13x\_ d2nxoa1  
d4pfua\_ d3ttma\_ d1elja\_ d2qmwa1 d1us5a\_ d1y3na1 d1jeta\_ d1uqwa\_  
d4f19a1 d2esna2 d3thia\_ d3fasa1 d2uyeb\_ d2xwva1 d1r9la\_ d2fyia1  
d1pb7a\_ d2ozza1 d1sw5a\_ d1nh8a1 d1vr5a1 d2g29a\_ d1xs5a\_ d3lswa\_  
d2z23a\_ d3w9va\_ d3tcha\_ d1q35a\_ d1z7me1 d3q27a\_ d1p99a\_ d1ve4a1



d2i6ea1 d4mcoa1 d4n8ya\_ d1eu8a\_ d1zba1 d1hsla\_ dlixca2 dlj1na\_  
d1xvya\_ d1y9ua\_ d2z22a1 d1xoca1 d4oera\_ d1wdna\_ d5f1qa1 dlxt8a1  
d1i6aa\_ d4gwoa\_ d4igta1 d1pc3a\_ d4mmpa1 d1o63a\_ d2czla1 d2onsa2  
d4mija1 d4ok5a1 d2bmfa1 d2bmfa2 d1yksa1 d1yksa2 d1jr6a\_ d2qeqa1  
d2jlqa1 d1eh3a\_ d3skpa\_ d1dtza2 d1ieja\_ d1jnfa2 d1ce2a1 d1jnfa1  
d1b1xa2 d1b1xa1 d1jw1a1 d1jw1a2 d1ryoa\_ d1h76a1 d1h76a2 d1c4oa1  
d2p6ra3 d2p6ra4 d1oywa2 d1oywa3 d1wrba1 d1w36b2 d1w36b1 d1c4oa2  
d3bora\_ d1t6na\_ d2eyqa5 d2eyqa3 d2eyqa2 d2zu6a2 d1veca\_ d1uaaa1  
d1w36d1 d2g9na1 d1z3ix2 d2rb4a\_ d1hv8a1 d1hv8a2 d1t5ia\_ d1w36c2  
d2j0sa2 d2j0sa1 d1fuka\_ d3hjha1 d1z5za1 d1qdea\_ d1z63a1 d1s2ma2  
d1s2ma1 d1wp9a1 d1wp9a2 d1gm5a3 d1gm5a4 d3dina4 d3dina3 d1q0ua\_  
d1w36c1 d1z3ix1 d1nkta3 d1nkta4 d1uaaa2 d1w36d2 g1qhh.1 d2fwra2  
d2fwra1 d1oewa\_ d2qzxa\_ d2asia\_ d1psoe\_ d1miqa\_ d1smra\_ d2h6ta\_  
d1pfza\_ d1lizda\_ d3hd8a\_ d1j71a\_ d1dpja\_ d4aa9a\_ d1t6ex\_ g1b5f.1  
g1lya.1 g1htr.1 d1qdma2 d1bxoa\_ d1wkra\_ d1tzsa\_ d2qzwa\_ d1bdqa\_  
d3ggta\_ d3ixoa\_ d1mrxa\_ d2haha\_ d1tw7a\_ d4njsa\_ d1sgua\_ d2p3da\_  
d1nsoa\_ d3d3ta\_ d2rkfa\_ d1c6ya\_ d2rspa\_ d3ogpa\_ d3ekwa\_ d2o4na\_  
d2j9ja\_ d1baia\_ d3ggua\_ d3lzua\_ d4npua\_ d4j55a\_ d2r8na\_ d2fxda\_  
d2p3ca\_ d4dqea\_ d3ttpa\_ d3t3ca\_ d2p3aa\_ d2hc0a\_ d2fdda\_ d3mwsa\_  
d1k8rb\_ d1wgra1 d1ef5a\_ d1wfy1 d1e8ya3 d1wgya1 d1l1fa\_ d2cs4a1  
d1wxma1 d2byea1 d3kh0a1 d2byfa1 d1wxaa1 d1e7ua3 d4y18a1 d2a16a3  
d1wgda1 d1wga1 d4q5eb\_ d1wjna1 d1se9a\_ d3n3kb\_ d1wz0a1 d1we6a1  
d2m0xa\_ d2gbka\_ d3rt3b1 d1wh3a1 d1sifa\_ d2ekek2 d4ii2b1 d4hk2a1  
d1c3ta\_ d1m94a\_ d1wgha1 d1ttna1 d1j8ca\_ d1wx8a1 d3v6cb1 d2ma9b\_  
d4i61b1 d1bt0a\_ d2jvca1 d1iyfa\_ d2k1fa\_ d1wxva1 d1wf9a1 d1t0ya\_  
d2io0b2 d1x1ma1 d2gbma\_ d1zw7a1 d2m17a\_ d1we7a1 d2lwp1a\_ d2gbja\_  
d1wjua1 d1v6ea1 d1v86a1 d4eewa\_ d1wiaa1 d4icva\_ d4gu2a\_ d1wx7a1  
d1wy8a1 d4hjka1 d2faza1 d1v5oa1 d2a13a1 d2cr5a1 d1wj4a1 d1s3sg\_  
d3ulra1 d1g9ka2 d1kapp2 d1g66a\_ d5ajha1 d4lu0a\_ d1of8a\_ d3unda1  
d3e9aa1 d1vr6a2 d1n8fa\_ d2qkfa\_ d1d9ea\_ d1o60a\_ g1y43.1 d1um8a\_  
dlixza\_ d1qvra2 d1qvra3 d1qzma\_ d1sxjc2 d1jr3d2 d2p65a\_ d1l8qa2  
d1g8pa\_ d3hu3a3 d1sxjd2 d1njfa\_ d1in4a2 d1sxja2 d1tuea1 d2ce7a2  
d1w5sa2 d1sxjb2 d1d2na\_ d1ny5a2 d1ofha\_ d2gnoa2 d2a5yb3 d1fna2  
d1u0ja1 d1lv7a\_ d1iqpa2 d2fnaa2 d1ixsb2 d4gita\_ d1sxje2 d1g41a\_  
d2e3fa\_ d1mm0a\_ d2e3ea\_ d2l1da\_ d2ny8x\_ d2e3ga\_ d2ny9x\_ d2nz3a\_  
d2lj7a\_ d1n4na\_ d2m8bb1 d2kyqa\_ d3psma\_ d1jkza\_ d1jxca\_ d2g11a\_  
d1ugla\_ d4uj0a\_ d2k4ua\_ d1hp2a\_ d2lu9a\_ d1baha\_ d2meoa1 d1wm7a\_  
d1n8ma\_ d1jlza\_ d1wpda\_ d1c55a\_ d1pvza\_ d1wt7a\_ d1rjia\_ d1wz5a\_  
d1m2sa\_ d1pjva\_ d1c49a\_ d1qkya\_ d2ktca1 d1wmta\_ d1du9a\_ d1j5ja\_  
d1rlga\_ d1t0za\_ d2i61a\_ d1t1ta\_ d1sn4a\_ d1kv0a\_ d2l1kba\_ d1npia\_  
d1wwna\_ d1pe4a\_ d2kbka\_ d2li7a\_ d1djta\_ d2kbha\_ d1dq7a\_ d1sega\_  
d1omya\_ d1zywa1 d1jzaa\_ d1ixra2 d1iyjb4 d1iyjb5 d1iyjb3 d1o7ia\_  
d4ipca1 d1x3ea\_ d4apva\_ d1jb7a1 d1jb7a2 d1jb7a3 d3kdfa\_ d1ue1b\_  
d1wjja1 d3eiva\_ d1xjva2 d1xjva1 d2ccza2 d1se8a\_ d1l1loc\_ d1jb7b\_

d1qvca\_ d3ulla\_ d1qzga\_ d1miua4 d1miua5 d1miua3 d1y14b1 d2nn6i1  
d1i94l\_ d2zjra2 d1smxa\_ d2qamc2 d1hh2p1 d2r7da1 d1rl2a2 d1wfga1  
d3bzk4 d1x6oa2 d3a0ja\_ d2j01d2 d2ja9a1 d4q15a\_ d1hr0w\_ d1luza\_  
d2n3sa\_ d2vnud1 d1h95a\_ d1go3e1 d2nn6h1 d2mola\_ d1iz6a2 d1jjga\_  
d1e3pa2 d2ix0a3 d2ix0a2 d2lxja\_ d1ueba3 d1ueba2 d2z0sa1 d1u0la1  
d2ix0a1 d2eifa2 d2je6i1 d3i2za1 d2c35b1 d2ahob2 d1t9ha1 d3i4oa\_  
d2qall1 d1jt8a\_ d2nn6g1 d1g6pa\_ d3cama\_ d1i94q\_ d1c9oa\_ d1d7qa\_  
d2ba0a1 d2vnud2 d2vnud3 d1khia2 d2qalq1 d1wi5a1 d1xtda2 d1ny4a\_  
d1pfsa\_ d2a1ka\_ d1rpma\_ d2shpa1 d1yfoa\_ d1l8ka\_ d2ooqa1 d1g4us2  
d1p15a\_ d1lara2 d1lara1 d1wcha\_ d2fh7a2 d2fh7a1 d1ohea1 d1ohea2  
d2f4da\_ d1rxda\_ d2hxpa\_ d1xria\_ d1d5ra2 d1fpza\_ d3ezza\_ d4y2ea\_  
d1c1la\_ d4lbqa\_ d1a78a\_ d1slta\_ d4no4a\_ d3zsja\_ d3duia\_ d1is3a\_  
d1qmja\_ d1hlca\_ d1tdha3 d1q3ba3 d1ee8a3 d1k82a3 g1qmo.1 g1len.1  
d3zyra\_ d1fnya\_ d1n47a\_ g2ltn.1 d1avba\_ d3usua\_ d1dhkb\_ d1f9ka\_  
d1ukga\_ d1g8wa\_ d1g9fa\_ d1wbfa\_ d3wcsa\_ d1g7ya\_ g1loe.1 d1mvqa\_  
d1hq1a\_ d1v6ia\_ d1qnwa\_ d1fx5a\_ d4l8qa\_ d1ioaa\_ d3n35a\_ d3ubra\_  
d1qo8a1 d1d4ca1 d2k3va\_ d1ft5a\_ d1qdba\_ d2j7aa\_ d1h21a\_ d1ogyb\_  
d4fasa\_ d1jnia\_ d1oaha\_ d1sp3a\_ d2h0ba\_ d2erfa\_ d1h30a2 d3mw4a1  
d1pz7a\_ d2r1ba\_ d3v64a1 d1d2sa\_ d3bopa1 d3mw3a1 d1okqa1 d1okqa2  
d1dszb\_ d1a6ya\_ d3cbba\_ d1ynwa1 d1r4ia\_ d1hcqa\_ d2hana\_ d2hanb\_  
d2enva1 d1kb4b\_ d2n11b\_ d1l01a\_ d1adqa1 d1fnga1 d1uvqb1 d1zs8a1  
d2vola1 d2vola2 d1mfb12 d2jelh2 d1uwel2 d3qq4b1 d1kjob\_ d1k5na1  
d1osph2 d4odh12 d1ow0a1 d1ow0a2 d1bfob2 d3l9ra2 d3jtt1 d2fath2  
d4elkb2 d1fn4b2 d2xfxb\_ d1pg7x2 d1cqka\_ d4k71b2 d1l1k2a1 d1eapb2  
d4lfhg2 d1i4fa1 d2nw2a2 d1kfah2 d1mhca1 d1h3ua1 d1wejh2 d1h0db2  
d1a5fh2 d1kcvh2 d1mjuh2 d1qqda1 d1kcrh2 d1k8ia1 d3huja2 d2nnab1  
d1nfd2 d3mffb2 d1s9va1 d1l1k3h2 d1q0x12 d1fv1b1 d1neza1 d4rf2b2  
d1r3ha1 d1a6tb2 d1kjva1 d1pz5b2 d1onqa1 d2bc4a2 d1de4a1 d1k8da1  
d1tcra2 d1dn0b2 d1nfde2 d2xwtb2 d1bfoa2 d1mexh2 d1iakb1 d1ypzf2  
d4f7ea2 d1q72l2 d2fbjh2 d1fe8h2 d1clzh2 d1fngb1 d1uvqa1 d1vgka1  
d1c16a1 d4j12a2 d4x99b2 d1igtb3 d1je6a1 d1q72h2 d1teth2 d2hmic2  
d1ilca2 d1ilca1 d1k8ib1 d1q0yh2 d1kfa12 d3frua1 d1pg7w2 d1u58a1  
d1igyb4 d1igyb3 d1hyrc1 d1klub1 d1deeb2 d1c12b2 d2bc4b2 d2ig2h2  
d1kcv12 d3wn5b1 d1l1k2b\_ d1l1k3l2 d1mjul2 d1sm3h2 d1q0xh2 d1zvs1  
d1ydp1 d1u8ib2 d1ypze2 d1kcu2 d1op9a\_ d1y01a1 d1letzb1 d1egj11  
d2gsib1 d1nj9a1 d4jfh1 d1aqk11 d1t2ja\_ d1l04h1 d1zvya1 d3v4v11  
d4enec1 d1kxtb\_ d5e8ea1 d2pxya\_ d4weud\_ d1xiwc\_ d2esvd1 d1qznh\_  
d1ogae1 d1f4xh1 d4n1hb\_ d3ezjb1 d3mlw11 d1kfah1 d1letza1 d1b4jh1  
d3cfic\_ d4w68a\_ d2arja1 d1ek3a\_ d2ok011 d1vera\_ d1uwgh1 d1blnb1  
d1fpth1 d1rzga1 d2giya1 d4m3kb1 d1nc2a1 d2nyyd1 d1ncna\_ d1fbih1  
d5dxwa\_ d4fqqa1 d1dqdh1 d1jfq11 d1kelh1 d1faih1 d1frgl1 d1fig11  
d4m6n11 d1fo0a\_ d4hxb11 d3b5ga\_ d3quyd1 d2h9gb1 d1i8kb\_ d2dd8h1  
d2ck0h1 d1eaja\_ d4w6wb1 d2a6ib3 d1t66d1 d2e27h\_ d1ob1b1 d1f11b1  
d2v7na1 d1ad0a1 d2xt1b1 d1pskh1 d4i13b1 d2op411 d1a0q11 d1uwel1

d1za3a1 d1ncb11 d4uu9a\_ d1bm3h1 d1cloh1 d1nqba2 d1cf8h1 d4y5va\_  
d1mhph1 d5anma1 d4cdgc1 d4ldeb\_ d1y0lb1 d2pcpb1 d1z3gl1 d1dfb11  
d1fh5h1 d3g5xa1 d1tzib1 d4dn3l1 d3zhka1 d2b1hh1 d2uyla1 d1f3dh1  
d1nj9b1 d2agjh1 d2h1pl1 d1q72h1 d8fabbb1 d1ndmb1 d1rjca1 d4u6hb1  
d3upca\_ d2fbj11 d1osph1 d1tvda\_ d2cjvh\_ d4fhbd1 d1bd2d1 d1rz7h1  
d3nn8a\_ d1blna1 d1knoa1 d1nfda1 d2bmkb1 d1dq11\_ d1igyb1 d1igf11  
d12e8h1 d3utza1 d1nc2b1 d1rihh1 d4mwfb1 d4jvpa1 d1mieh1 d1rhfa1  
d1fgn11 d1sbsh1 d1lp9e1 d1dn0a1 d4lqf11 d1iaih1 d1kgcd1 d1mh5b1  
d1gpol1 d2g60h3 d1f8t11 d2jixd1 d4grwh\_ d1fo0b\_ d1bfob1 d1axsa1  
d1u9ka\_ d1nmbh\_ d1h8na1 d1h8na2 d1jguh1 d4eura1 d3sdy11 d35c8h1  
d1w72l1 d1mvub\_ d1i9rh1 d1ob1a1 d4wenb\_ d1yeeh1 d3ietc1 d1f58h1  
d1ad0b1 d1mqk1\_ d1nbvh1 d4b50a\_ d3r8bb\_ d1baf11 d1mamh1 d4rgne1  
d2gsgb\_ d35c8l1 d1bafh1 d1ai1h1 d2pcpa1 d2fath1 d2x1pa\_ d1orsb1  
d1ibgl1 d1shma\_ d1a2yb\_ d1u0qa\_ d2coqa\_ d1hilb1 d1qfwi\_ d1jv5b\_  
d1fn4b1 d5e0qa\_ d1nsnh1 d1plgl1 d4ocx11 d1kb5h1 d1rzhf1 d1pg7x1  
d2fx7h1 d2oi9c\_ d1l7i11 d3eyva1 d1d5i11 d4ffyl\_ d1tet11 d1a6wh\_  
d1ac6a\_ d3dvfa\_ d1nfde1 d1mimh1 d1ri8a1 d1jhlh\_ d3dura\_ d1fskb1  
d1f97a1 d3so3b1 d2ak4d1 d1lp9f1 d4z7wf1 d1l7th1 d4y5ya\_ d4x7ec1  
d1emth1 d1ikf11 d1nlbh1 d4utal1 d1bjma1 d1eapb1 d1u6ah1 d2dtgd1  
d1kj2b\_ d1xeda1 d1cleh1 d1fgvh\_ d2bnub1 d2fb4h1 d2dtgb1 d1ktrh\_  
d1jpth1 d1qkz11 d4hepg\_ d2atpb1 d1flrh1 d2hrpl1 d1mvfa\_ d1iaim1  
d3k80a1 d2jb5h1 d3zkxc\_ d4grwe\_ d1it9h1 d1rhhb1 d3w9ec\_ d1e4wh1  
d1sy6h1 d2j6eh1 d3qxta\_ d1jglh1 d1p7ka1 d1tzhb1 d4n8pa1 d1gaf11  
d2jelh1 d1wioa2 d4i0cc1 d1cicb1 d1lmka2 d1lmka1 d1iqwh1 d1lorqb1  
d1ejoh1 d1jnlh1 d4zgl1a\_ d43c9b\_ d1ggbl1 d1wejh1 d3q6fa1 d1f3dj1  
d3c6la1 d1bqlh1 d3p9wb\_ d1a3r11 d1h0db1 d2uzil\_ d1eo8l1 d1qfwl\_  
d1n7ml1 d1igja1 d1c5ch1 d2a9mh\_ d1rmfh1 d1fj1b1 d4heme\_ d1ccza1  
d1a5fh1 d1ogad1 d1dlfh\_ d1qa9b\_ d1vgel1 d3qskb\_ d1sjxa\_ d4ozfg1  
d1sq2n\_ d1qd0a\_ d1kcvh1 d1c5db1 d3qcul1 d8faba1 d3bn9d1 d1mjuh1  
d4y8dc\_ d7fabh1 d3dvgb1 d1lo0l1 d1a6tb1 d1gigh1 d1kcrh1 d2hwz11  
d1yjdc1 d3clfl1 d4krna\_ d1dl7l1 d1e6ol1 d1mexh1 d3r0ma\_ d4kkna\_  
d1fns11 d1oaqh\_ d1rzia1 d1ucbh1 d1ncw11 d4b41a\_ d1nfd11 d2mpah1  
d2d7t11 d4grwf\_ d4b5ea\_ d1lk3h1 d3u79a\_ d4u3xa\_ d1ghf11 d1bvkb\_  
d1mcww1 d1b88a\_ d1jrhh1 d32c2b1 d4wemb\_ d1dsfh\_ d1op3h1 d1ce111  
d1iqda1 d1qoka1 d1qoka2 d1qfuh1 d2crya1 d1ay1h1 d1oaql\_ d3ab0b\_  
d1rur11 d1t4kb1 d1bz7b1 d1n0xh1 d1for11 d1ucb11 d4w6yb\_ d43c9a\_  
d2aabl1 d1tzia1 d4n1ca\_ d1k6qh1 d3g9ab\_ d4tvsa1 d1ligmh\_ d1pz5b1  
d3dx9a1 d3wxwh\_ d1nakh1 d1kcul1 d3eaka\_ d4qlra1 d1cr9l1 d1d9ka\_  
d1f4x11 d1deea1 d2i27n2 d1c12a1 d2orb11 d1j8hd1 d1mcph1 d1c5da1  
d1kenh1 d1bd2e1 d1h5ba\_ d4x7fc1 d3upaa\_ d1t3fa1 d1indh1 d2dtgc1  
d4hc111 d1zv5a1 d4wgvb\_ d1uwgl1 d4f37k1 d1aqkh1 d1vesa\_ d3zkqd\_  
d1fpt11 d1lo4l1 d1knob1 d3rrqa\_ d1ct8b1 d4orz\_ d1mlbb1 d4hgkc1  
d1dqdl1 d1bogb1 d4ozhe1 d1dr9a1 d1i7za1 d1dn0b1 d1kell1 d1rzib1  
d1ypzf1 d1wtla\_ d1hkfa\_ d1fail1 d1figh1 d2vyre\_ d1sjva\_ d1ohqa\_

d1bfoa1 d1pkqbl d1mjul1 d1b4jl1 d1nsnl1 d2arjb1 d1p4bh\_ d4aj0a\_  
d3nn8b\_ d2rcja1 d1f2xk\_ d4v1dd\_ d1adqh1 d2eksa\_ d4k3ga\_ d1jfqh1  
d1uweh1 d1frgh1 d4gftb\_ d1uz8b1 d4n1ea\_ d1bm3l1 d1clol1 d3mcka1  
d2vq1a1 d1ae6h1 d4aq1b1 d1uj3b1 d1nbqa1 d1fh5l1 d2ck0l1 d2ywza\_  
d1q72l1 d4nxbx\_ d1hila1 d4hz1b1 d2j88l1 d1zmya1 d1cd0a\_ d1a4ka1  
d1pskl1 d1a0qh1 d4krmb\_ d1ncbh1 d2fbjh1 d1j8he1 d1i3ua\_ d1cf8l1  
d1fe8h1 d2p1ya1 d1eeqa\_ d2x89a\_ d1ol0a\_ d2r0lh1 d1ub5a1 d1dfbh1  
d3eyvb1 d4jdvb1 d4p2cg\_ d2gsia1 d2agjl1 d1u3ha1 d2h1ph1 d1rihl1  
d1fskc1 d1boga1 d2a77l1 d1ospl1 d1qfoa\_ d3dwta\_ d2fx7l1 d1rz7l1  
d3stba1 d1pkqa1 d1b6da1 d1dzba2 d1dzba1 d1kj2a\_ d4l1ha\_ d1rzgb1  
d1dq1h\_ d12e8l1 d1miel1 d1jmaa\_ d1sbsl1 d1fgnh1 d1f58l1 d1mqkh\_  
d1ndgb1 d3qegl1 d1iail1 d2aw2a1 d1tqbc1 d3fo2a1 d4dkaa\_ d1f8th1  
d2g60l1 d2ywya\_ d1uj3a1 d1yc7a\_ d3bd3a\_ d4w6xb1 d1nmb1\_ d1i8ka\_  
d1rjlb1 d1ypze1 d1p7kb1 d1kxqe\_ d1gpoh1 d2z4qa1 d1w72h1 d1i9rl1  
d4qgya1 d4xt1c\_ d2qqnh1 d1cica1 d3c08h1 d2cd0a\_ d2bdnh1 d1hnga1  
d1mam11 d1nldh1 d1cr9h1 d4lcih1 d3bkyh1 d3qg7l1 d1ai1l1 d1kxvc\_  
d4iosd\_ d1l7ih1 d2x1qa\_ d1ub6b1 d3k74b\_ d1ibgh1 d1teth1 d1igya1  
d1hxma1 d2x6ma\_ d2e7la\_ d5e03a\_ d1qfwm\_ d2r0kh1 d1igjb1 d1rurh1  
d1plgh1 d1mj8h1 d1yuhb1 d3fmg11 d1rzfl1 d1emt11 d1ad9b1 d1igtb1  
d1nlbl1 d1d5ih1 d3k7ua\_ d4ffyh\_ d1bwwa\_ d3dvga1 d1a6ta1 d1fgvl\_  
d4qxgl1 d1miml1 d1jh1l\_ d2hffb1 d2hh0l1 d1qkzh1 d1l7tl1 d1afvh1  
d1iaii1 d2cjuh\_ d1um5h1 d2ghwb2 d2ghwb1 d1kgce1 d2fgwh1 d1ikfh1  
d1dvfd\_ d2i24n1 d2xtjb\_ d1za3b1 d2yc1a\_ d2hh0h1 d2x1oa\_ d1bvka\_  
d1rjla1 d5e7ba1 d1igta1 d1il1b1 d2fb4l1 d1mvua\_ d1jpt11 d32c2a1  
d1fvca\_ d1iqdb1 d2hrph1 d2p4ab\_ d4qo1a\_ d1p2cb1 d1wt5c\_ d1t4ka1  
d5c1mb\_ d1it9l1 d1bz7a1 d1b2wh1 d1e4wl1 d1jn1l1 d1yedb1 d1za6b1  
d3u7aa\_ d1igfh1 d3gnm11 d1orsa1 d1wejl1 d1a2ya\_ d1hxmb1 d1gafh1  
d2j4wh1 d1pz5a1 d1j05a\_ d1a3rh1 d4fq1l1 d1qfwh\_ d1eo8h1 d1n7mh1  
d4s11a\_ d1kegh1 d5da4a\_ d1iqwl1 d3whxb1 d1vgeh1 d1deeb1 d1c12b1  
d1t2q11 d1ad9a1 d3gsnb1 d3b2uc1 d1ggbh1 d1t3fb1 d1nakl1 d4ocmc\_  
d1lila1 d2v7hb3 d2esve1 d1mcoh1 d2qr0b1 d2q3aa\_ d1ct8a1 d1kcr11  
d2pxyb\_ d2uzih\_ d5c3ld\_ d3durb\_ d1c5cl1 d2ak4e1 d1d17h\_ d1xiwd\_  
d1mlba1 d1rmfl1 d1i7zb1 d1dlfl\_ d2xa3a\_ d5bq7b1 d1dqqb1 d3h42l1  
d1egjh1 d1kcvl1 d1fe8l1 d2j6el1 d1f3rb2 d1lk3l1 d1sm3h1 d1q0xh1  
d1ghfh1 d7fabl1 d1igch1 d1lo0h1 d4idla\_ d5c2b1\_ d1jrh11 d3zhda1  
d4kfzc\_ d1b0wa\_ d1e6oh1 d1mexl1 d4krpb\_ d1fnsh1 d1ncwh1 d4hgma\_  
d4eigb1 d4rzca\_ d2mpal1 d4y5xa\_ d5en2b1 d3lrga1 d4ej1c1 d1rhha1  
d1j05b\_ d1forh1 d1q9wb1 d2wzpd\_ d2aq2a1 d1h0da1 d3revb1 d2ij0c1  
d1tzha1 d4m7jl1 d1k6ql1 d3b9kc1 d1igml\_ d3qeua1 d1dsfl\_ d1celh1  
d1kcu11 d1zvha1 d1zvoa1 d1tqbb1 d1ay1l1 d2qsc11 d2cgrh1 d1n10h1  
d1ken11 d3eo0a1 d4n9ob1 d1n0xl1 d3k1kc\_ d1c4qa\_ d1prtc1 d2wv6d\_  
d1prt1f\_ d1l1trd\_ d4l63b1 d1r4pb\_ d1t10f\_ d2bosa\_ d1prt1b1 d3chbd\_  
d2aq2b1 d1enfa1 d1i4pa1 d1v1oa1 d1et9a1 d1esfa1 d2g9hd1 d4ohja1  
d1klud1 d1bxta1 d1eu3a1 d1ty0a1 d1fnua1 d2cqva1 d1fhga\_ d2k1ma\_

d1biha3 d1biha1 d1biha4 d3qp3a1 d1g1ca\_ d1gxea\_ d1cvsc2 d1cvsc1  
d1xmwa2 d1m4ka2 d2otpa2 d1biha2 d1rhfa2 d2fcba2 d2fcba1 d1wwbx\_  
d1gsm2 d1epfa1 d1epfa2 d2dava1 d1waaa\_ d1f97a2 d1x44a1 d1vcaa2  
d1fnla2 d1fnla1 d3b5ha2 d3h8na2 d3h8na1 d1jbja1 d1jbja2 d1pd6a\_  
d1f2qa2 d1f2qa1 d3cx2a\_ d1nbqa2 d3b5ha1 d1n26a1 d1xiwb\_ d1xaua\_  
d1fltx\_ d2ifga1 d1olla1 d1olla2 d1cs6a4 d1cs6a3 d1cs6a2 d1cs6a1  
d2gw5a2 d1sy6a1 d1xiwa\_ d1lucta2 d1lucta1 d1ry7b2 d1gl4b\_ d1qz1a3  
d1olza1 d2c9aa1 d1wwca\_

**Family-9 (a.26.1.1)**

**Positive dataset contains 2 protein sequences.**

d1z7ca\_ d1huwa\_

**Negative dataset contains 4058 protein sequences.**

d1m32a\_ d1libja\_ d1c7na\_ d1iuga\_ d4q75a\_ d2bkwa1 d1t3ia\_ d1n8pa\_  
d1qz9a\_ d1jff9a\_ d1leg5a\_ d1p3wa\_ d3kgwa\_ d1c11a\_ d2ctza1 d1vjoa\_  
d2rfva\_ d1gc0a\_ d1cs1a\_ d1d2fa\_ d2ch1a1 d1qgna\_ d1pffa\_ d1elua\_  
d1u08a\_ d1lc5a\_ d1b5pa\_ d2ay1a\_ d1bw0a\_ d3pd6a\_ d7aata\_ d2csta\_  
d1fg7a\_ d4wlha\_ d1o4sa\_ d1v2da\_ d1gdea\_ d1m6sa\_ d1v72a1 d1svva\_  
d1ajsa\_ d1wsta1 d2f8ja2 d1lk9a\_ d1vp4a1 d1xi9a1 d2gb3a1 d1yaaa\_  
d1xkla\_ d2wfla\_ d1xkta1 d2hfka\_ d1jmkc\_ d5d3ka\_ d1i26a\_ d1ddla\_  
d1auyb\_ d1qnia1 d1fwxa1 d1f56a\_ d1bypa\_ d1azca\_ d1ws8a\_ d3u25a\_  
d1cuoa\_ d1lid2a\_ d1rkra\_ d2iaac\_ d4dp1x\_ d1nwpa\_ d2gima\_ d2i7sa\_  
d1qhqa\_ d3ehbb1 d1fftb1 d1gyca3 d1hfua2 d1kbva1 d1kbva2 d1sdda1  
d1sdda2 d1gyca1 d1gyca2 d1mzya1 d2bw4a1 d1aoza1 d1aoza3 d1aoza2  
d1kyaa2 d1kyaa3 d1kyaa1 d1mzya2 d4e9sa1 d1sddb1 d1sddb2 d1hfua1  
d1hfua3 d1oe1a2 d1oe1a1 d1v10a2 d1v10a3 d1v10a1 g1f8v.1 d1novc\_  
d1h4ra3 d4y18a1 d2a16a3 d2cfba1 d1dfoa\_ d1o69a\_ d1bj4a\_ d3k28a\_  
d2bwpa\_ d3lg0a\_ d2fnua\_ d3ou5a\_ d1z7da1 d1b9ha\_ d1iaya\_ d4msoa\_  
d1bs0a\_ d1s0aa\_ d1sffa\_ d3tqxa\_ d1mdoa\_ d3qboa\_ d3pgya\_ d1bjna\_  
d2dkja\_ d1ejia\_ d1vefa1 d4wxga\_ d3bs8a\_ d3gbxa1 d1w23a\_ d1a3qa1  
d1iknc\_ d3brda1 d1p7h11 d1oy3c\_ d1imhc1 d1zk9a1 d2cxka1 d2bema\_  
d1pama1 d1ea9c1 d1qhoa1 d2fhfa2 d2fhfa1 d1k3ia1 d1j0ha1 d1cxl1a1  
d2bhua1 d1edqa1 d1f1sa2 d1ut9a2 d1gvia1 d1txka1 d4alac\_ d1pjwa\_  
d1rera1 d1s6na\_ d3uzqb\_ d2phla2 d2phla1 d1fxza2 d1fxza1 d1uija1  
g1dgw.1 d2v09a\_ d1uika2 d1uika1 d1dgwa\_ d1v70a\_ d2f4pa1 d1yhfa1  
d2b5ea2 d2b5ea3 d2b5ea1 d2b5ea4 d2kp1a1 d2kp2a1 d1hyua3 d1hyua4  
d1j08a1 d1j08a2 d1cg2a1 d1yloa2 d1y7ea2 d1y0ya3 d1lfwa1 d1vixa1  
d1fnoa4 d1vhua2 d1ysja1 d1vhea2 d1z21a1 d2fvga2 d1vgya1 d1r3na1  
d2grea2 d1xmba1 d1rtqa\_ d2bjca1 d2hsga1 d1qpza1 d1efaa1 d1mqta\_  
d1d4m3\_ d1fmd3\_ d2mev1\_ g1aym.1 d1ev13\_ d4q4w1\_ d1r1a3\_ d2x5ia\_  
d1rhi1\_ g1r1a.1 g1d4m.1 g1rhi.1 d1b35b\_ d1loopa\_ d1tme1\_ d4iv1a\_  
g1pvc.1 g1fpn.1 d1fpn1\_ d4gb31\_ d1d4m1\_ d1fmd1\_ d2wzr3\_ g1cov.1  
d1qqp3\_ g1fmd.1 d2x5ic\_ d1rhi3\_ g1oop.1 d1hxs1\_ g1hxs.1 d1fpn3\_  
d1bev1\_ g2mev.1 d1eah3\_ d1aym1\_ d1pvc3\_ d1qqp1\_ d1zba3\_ d1h8ta\_  
d3vbhc\_ g1b35.1 g1bev.1 d1hxs3\_ g1ev1.1 d1bev3\_ g1tmf.1 d1tmf1\_

d1b35a\_ d2mev3\_ gleah.1 glh8t.1 dleah1\_ d4q4w3\_ d1r1a1\_ d1aym3\_  
d1pvc1\_ d1zba1\_ d1h8tc\_ d1oopc\_ d1tme3\_ glqqp.1 d4iv1c\_ gltme.1  
d1r0ka3 d1j5pa3 d1vkoa2 d1vm6a2 d3qvsa2 d1p1ja2 d2ovga\_ d1sq8a\_  
d1rzsa\_ d3kz3a\_ d3orca\_ d1lux8a\_ d1dlya\_ d4i0va\_ d2bkma\_ d1dlwa\_  
d2bmma\_ d2msya\_ d2djoa1 d2r5za\_ d1au7a1 d1f43a\_ d2lmda1 d1akhb\_  
d1s7ea1 d3nara\_ d1zq3p1 d2craa1 d1mija\_ d4uuta\_ d3a01a\_ d1x58a1  
d3rkqa1 d3cmya1 d2cqxa1 d2da6a1 d1e3oc1 d1fjla\_ d1mh3a1 d1lig7a\_  
d1x41a1 d1wh7a1 d1gt0c1 d2mw8a\_ d1lfup\_ d1x2ma1 d1b72a\_ d1wi3a1  
d1jgga\_ d1wjha1 d1x2na1 d1mnmc\_ d2cuea1 d3k2aa\_ d2hosa\_ d2jwta2  
d1pufa\_ d1octc1 d2hi3a\_ d1b8ia\_ d4j19a\_ d3lnqa\_ d1wh5a1 d1b8ib\_  
d1hcra\_ d1gdta1 d1u78a2 d6paxa1 d6paxa2 d1k78a1 d1k78a2 d1xg1a1  
d1itya\_ d1hlva1 d1iufa2 d1iufa1 d2dara2 d2dara1 d1wyha2 d2dloa2  
d1rutx4 d1rutx3 d2cuqa2 d1x41a2 d1x41a1 d1x3ha2 d1x3ha1 d2d8za1  
d1x61a2 d1x6aa1 d1x6aa2 d2cora2 d2cora1 d1v6ga1 d1v6ga2 d2d8za2  
d1x64a1 d1x64a2 d1b8ta1 d2co8a1 d1x63a2 d2dj7a2 d2dj7a1 d2cu8a2  
d2cu8a1 d1g47a2 d1j2oa1 d1wyha1 d2dloa1 d1wiga1 d1wiga2 d2cupa2  
d2cupa3 d1x68a1 d2d8ya2 d2d8ya1 d1m3va2 d1x62a1 d1x68a2 d1x61a1  
d1b8ta3 d1b8ta2 d2d8xa2 d2d8xa1 d1x4ka1 d1x4ka2 d2cuqa1 d1m3va1  
d2co8a2 d1j2oa2 d1x63a1 d2cura1 d2cura2 d1x62a2 d2iu5a1 d1zk8a1  
d2g7sa1 d2fd5a1 d2np5a1 d1z0xa1 d2id6a1 d2d6ya1 d2i10a1 d1vi0a1  
d2oi8a1 d3c07a1 d2ns7a1 d2fq4a1 d2yvea1 d1t33a1 d2o7ta1 d1rktal  
d2np3b1 d2g7ga1 d2gena1 d2fbqa1 d2g71a1 d2gfna1 d2g3ba1 d2jj7a1  
d2hyja1 d1sgma1 d1ui5a1 d2hkua1 d2id3a1 d4jyka1 d3lv8a\_ d1s3ga1  
d1zaka1 d1s4qa\_ d3tvt2 d1uf9a\_ d1khta\_ d1ckea\_ d1losna\_ d1p5zb\_  
d4tmka\_ d3cm0a\_ d1tmka\_ d1jaga\_ d3h86a\_ d1t0hb\_ d1nn5a\_ d2h92a\_  
d3kb2a1 d2c95a1 d1yj5a2 d1kgda\_ d1ly1a\_ d2ak3a1 d1vyva2 d1deka\_  
d2grja1 d1p3ja1 d1y63a\_ d1e4ya1 d1s96a\_ d3iija1 d1lvga\_ d1nksa\_  
d1vyua2 d4e22a\_ d1qf9a\_ d1jjva\_ d1q3ta\_ d1ki9a\_ d1lw7a2 d1teva\_  
d1kjwa2 d2iyva2 d1kaga\_ d1viaa\_ d1e6ca\_ d1x6va3 d1g3ma\_ d1j99a\_  
d1t8ta1 d1nsta\_ d1fmja\_ d1zrha\_ d1ls6a\_ d2a3ra\_ d1aqua\_ d2zptx\_  
d3ckla\_ d1texas\_ d1q44a\_ d2gwha\_ d1z0ja1 d3umra2 d3gj0a1 d2gaoa1  
d1yzga1 d1x3sa1 d1g7sa4 d1puja\_ d1udxa2 d1kk1a3 d2o52a\_ d1jwyb\_  
d1zcaa2 d1zcba2 d2fv8a1 d2cjwa\_ d3dz8a1 d1xzpa2 d1vg8a\_ d4qxaa\_  
d2ew1a1 d1x1ra1 d2bcgy\_ d3doea1 d3cona\_ d3rega\_ d3wyga\_ d1upta\_  
d2b6ha1 d1zd9a1 d1lnza2 d1r5ba3 d1n0ua2 d1r2qa\_ d2f91a1 d2rhda\_  
d3q3jb\_ d3q85a\_ d1efma1 d1r8qa\_ d2gf9a1 d2akab1 d1ek0a\_ d1z08a1  
d2gcoa1 d2dy1a2 d4g01b\_ d2cxa1 d1svia\_ d3q72a\_ d1ni3a1 d4ac9a4  
d2erxa1 d2bmea\_ d1wxqa1 d2gf0a1 d4ldja1 d1zunb3 d1d5ca\_ d4lv5b\_  
d1efca3 d1kmqa\_ d2g6ba1 d3lrpa\_ d1tada2 d2y8ea\_ d4rd4a1 d1z06a1  
d2heia\_ d3a58b\_ d1u01a2 d1d2ea3 d1zj6a1 d2ocba\_ d3rwoa\_ d1mr3f\_  
d2e9sa1 d4u5xa1 d2iwra\_ d2fn4a1 d3bwdd\_ d2nzja1 d2atva1 d2ksqa\_  
d3l43a\_ d1mkya2 d1mkya1 d1wmsa\_ d1jnaya3 d2rmka\_ d1f6ba\_ d1f60a3  
d1gota2 d1jala1 d2fh5b1 d1g16a\_ d2wblc\_ d1m7ba\_ d1wf3a1 d1f5na2  
d1t9ha2 d1z6xa1 d1z0aa1 d2fg5a1 d2a5ja1 d2bcjq2 d1ky3a\_ d4y0va\_

d4lhwa\_ d2qmea1 d2atxa1 dlegaa1 dlryha\_ dlmoza\_ dlnrjb\_ d2erya1  
d3bfka\_ dlpuia\_ dlfzqa\_ d3j3az1 d3t5ga\_ dlshza2 d3defa\_ d2f7sa1  
d3raba\_ d3tsoa\_ d3aq4a\_ d2a17a1 d3sfva1 d3bc1a\_ d2ncda\_ d1sdma\_  
d3h4sa1 d2heha\_ d2grya\_ g3kin.1 dlbr2a2 dlgoja\_ dlf9va\_ d2mysa2  
d1lkxa\_ d3t0qa\_ d4db1a1 d3gbja\_ dlry6a\_ dlv8ka\_ dlk8ka2 dlk8ka1  
d3uleb1 d3i33a2 d3i33a1 dlbupa1 dlkkgd2 dlkkgd1 d4ci6a2 dljcfal  
d4a2ba2 d2fxua1 dlyaga2 dlyaga1 d4cbua2 dlbupa2 dl999a1 d2e1za2  
d2e1za1 d1saza1 d1saza2 dlig8a1 dlczan2 dlczan3 dlczan1 dlig8a2  
dlczan4 dlbg3a3 dlbg3a2 dlbg3a1 dlnira1 dlqksa1 d3h1jd1 d2d0oa3  
d2d0oa2 dlnbwa2 dlhroa\_ d4gedb\_ d3zooa\_ dlmez4a\_ dlgu2a\_ dlflfa\_  
dladvva\_ dlc6ra\_ dlc75a\_ d1e29a\_ dlgdva\_ dlcnoa\_ dlh32b\_ dlco6a\_  
d2bh4x\_ d2aiua\_ d5cytr\_ dljdlal\_ dli8oa\_ d2zboa\_ d3dmia\_ dl1s9a\_  
dlwvec\_ d2yk3a\_ d3ph2b\_ dlw0a\_ d5aura\_ dlql3a\_ dlqn2a\_ dlflca\_  
d4zzva\_ d2xspa\_ d4v20a\_ dlojja\_ d4ipma1 dlgpia\_ d4csia\_ d3pfza\_  
d3ovwa\_ d2yoka\_ d2nqya\_ dlh4ga\_ dlhixa\_ d1oa2a\_ dlolra\_ d3b7ma\_  
d4h7ma1 d3wp3a\_ d2vgda\_ dligoa\_ d3zsea\_ d2nlra\_ d3wx5a\_ d1oa3a\_  
dlpvxa\_ dlm4wa\_ dl1f5ja\_ d1oa4a\_ d4ixla1 d2ah2a1 dln1ta1 dl966a\_  
d5ajha1 d2b7la\_ d3rbaa\_ d2qtra\_ dlnupa\_ d3l92a\_ dl1f9aa\_ dlqjca\_  
d2h29a\_ dlvlha\_ dlod6a\_ dl1w7a1 dlmrza2 d4ruka\_ d2e17a\_ dl1q0a2  
dlirxa2 dl1r6ta2 dl1ivsa4 d2cyba\_ dl1rqga2 dl1j09a2 d2yxna\_ dl1f7ua2  
dl1h3fa1 dl1ffya3 d2g36a1 dl1nzja\_ dl1jila\_ dl1i6la\_ dl1pfva2 dl1h3na3  
d3n9ia\_ d3sz3a1 d3sw2a\_ dl1moxc\_ dl1dx5i3 dl1edmb\_ dl1autl2 dl1autl1  
dl1nqlb\_ dl1dval1 dl1szba2 dl1kigl\_ d2y5fl\_ dl1ijqa2 dl1gk5a\_ dl1g1sa2  
dl1nt0a3 dl1xdtr\_ dl1lmja2 dl1lmja1 dl1nzia2 d2wphe\_ dl1klil\_ dl1pfxl2  
dl1pfxl1 dl1p9ja\_ dl1g1ta2 dl1f7ea\_ d4yzub\_ d2mgpa1 dl1b9wa2 d2mgpa2  
dl1ob1c1 dl1ob1c2 dl1n1ia2 dl1n1ia1 d2npra2 d2npra1 dl1qx2a\_ d2y5ia\_  
dl1qlsa\_ dl1psra\_ d3n22a\_ d2egda\_ d4ggfc\_ d2wcea\_ d2luca\_ d4aqia\_  
d3nsia\_ d2lp3a\_ dl1j55a\_ dl1a4pa\_ dl1k8ua\_ dl1nsha\_ dl1pvaa\_ d3fs7a\_  
d2pvba\_ dl1ttxa\_ dl1rwy\_ d2kyfa\_ dl1rk9a\_ dl1a75a\_ dl1exra\_ dl1tiza1  
dl1nyaa\_ dl1g8ia\_ dl1ggwa\_ dl1wdcc\_ d3fwba\_ dl1ggza\_ d2o5ga\_ dl1ctaa\_  
dl1m45a\_ d3i5gc\_ dl1s18a\_ dl1fpwa\_ d2scpa\_ d2roaa\_ d4aqra\_ d3pn7b\_  
dl1br1b\_ d2mysb\_ dl1s6ca\_ dl1bjfa\_ d2obha\_ dl1jfka\_ dl1jf0a\_ dl1qv0a\_  
dl1lkja\_ d2mlfc\_ d2m97a\_ d2d8na\_ d4by5a\_ dl1jbaa\_ d4nqga\_ dl1wdcb\_  
d2mysc\_ dl1j7qa\_ dl1s6ia\_ dl1uhka2 dl1r2ua\_ dl1dtla\_ d3kf9a\_ d3pn7c\_  
d5d67d\_ dl1tuza\_ dl1h8ba\_ dl1eg3a2 d2zkmx1 dl1snla\_ dl1gjya\_ dl1y1xa\_  
dl1hqva\_ dl1dvia\_ dl1df0a1 dl1qxp2a\_ d4usla\_ dl1k94a\_ dl1wkya2 dl1uuqa\_  
d3wh9a\_ d4m1ra\_ dl1xyza\_ d4xuya\_ d2je8a5 d4bf7a1 d3cuia\_ dl1ur4a\_  
dl1qw9a2 dl1odza\_ d2vzsa5 dl1bqca\_ d2x2ya1 dl1hjqa\_ dl1qnra\_ d4y7ea1  
dl1vjza\_ d4k68a\_ d2v3ga\_ d4hpga\_ dl1nofa2 dl1nq6a\_ dl1h4pa\_ dl1aq0a\_  
d3ziza\_ d4bs0a\_ dl1ecea\_ dl1h1na\_ dl1ta3b\_ dl1w91a2 dl1i1wa\_ dl1uhva2  
dl1us3a2 dl1egza\_ d7a3ha\_ dl1tvna1 d3nyda1 dl1ghsa\_ d2cyga1 d4xv0a\_  
d2c8na2 dl1w32a\_ d3emca\_ dl1v6ya1 dl1foba\_ d2uwfa1 d2fgla\_ d3niya1  
d2c0ha1 dl1rh9a1 dl1yq2a5 dl1szna2 dl1fa2a\_ dl1pama4 d5do8a1 dl1ea9c3  
dl1hx0a2 d2fhfa5 dl1qhoa4 dl1avaa2 dl1m53a2 d4m8ua1 d2gjpa2 dl1lwha2

d4howa1 d1ktba2 d1j0ha3 d3vm5a1 d2x1ia\_ dlwzaa2 dluasa2 d2diea1  
d1mxga2 d1ht6a2 d1eswa\_ d1iv8a2 d5cpsa\_ dlud2a2 dlzjaa1 d3gbea1  
d1kwga2 d1wdpa\_ d1gcya2 d1g5aa2 d1hvxa2 d3dhp2a2 d2bhua3 d4do4a1  
d3qgva1 d1e43a2 d1g94a2 d2d3na2 d1gjwa2 d1gvia3 d1x1na1 d1r7aa2  
d1tz7a1 d4c7ga2 d2gjxa1 d1nowa1 d1yhta1 d4toqa\_ d1wb0a1 d1w9pa1  
d1eoka\_ d1itxa1 d1kfwa1 d1goia2 d1edqa2 d2gsja\_ d1hjxa1 d1jnda1  
d1vf8a1 d3wdpp1 d3wq5a\_ d1gnxa\_ d4gxpa\_ d4hz8a\_ d1e4mm\_ d3aiua\_  
d1wcca1 d1qvba\_ d3ahxa\_ d1v02a\_ d2dgaa\_ d1pbga\_ d1vffa1 d1qoxa\_  
d4ha4a\_ d1mixa2 d1e5wa2 d1j19a2 d2a16b2 d3syxa1 d2p8va\_ d1xoda1  
d1i7aa\_ d1evha\_ d1qc6a\_ d1egxa\_ d2y8ga\_ d1xkea1 d1k5db\_ d2y8fa\_  
d1offa\_ d1frra\_ d3wcqa\_ d1e9ma\_ d1l5pa\_ d1wria\_ d1i7ha\_ d3av8a\_  
d1czpa\_ d1rfka\_ d3p1ma1 d3b2ga\_ d2bt6a2 d1wgqa1 d1v89a1 d2coda1  
d1zc3b\_ d1wg7a1 d1u5ea1 d1v61a1 d2coca1 d2ys1a1 d1v5pa1 d1ntya2  
d1wjma1 d1wila1 d1u29a\_ d1xx0a1 d1unqa\_ d2zkmx3 d1fhoa\_ d1v88a1  
d2adza1 d1x1fa1 d1p6sa\_ d2coaa1 d1btka\_ d1v5ma1 d1faoa\_ d2x18a\_  
d1dyna\_ d1x1ga1 d4kaxb\_ d2j59m1 d1ki1b2 d1xcga2 d1txda2 d1u5da1  
d1wlha\_ d1upqa\_ d1v5ua1 d1foea2 d2fjla1 d1eaza\_ d2dfka2 d2cofa1  
d1kz7a2 d1h6ua1 d2ewda3 d1up7a1 d2dfda1 d1s6ya1 d1vjta1 d7mdha1  
d1hyea1 d1t2da1 d1ojsa3 d1b8pa1 d1ldna1 d1hyha1 d1civa1 d2a92a1  
d1ez4a1 d1i0za1 d1y6ja1 d1gv0a1 d1ur5a1 d1llda1 d1lobba1 d1v8ba1  
d1gdha1 d2dlda1 d1mx3a1 d1ygya1 d1qp8a1 d1li4a1 d1j4aa1 d2nacal  
d1npya1 d3t4ea2 d1a4ia1 d1o0sa1 d2hk9a2 d2egga2 d1b26a1 d1bvua1  
d1gq2a1 d1c1da1 d1leha1 d1gtma1 d1euzal d3dona2 d1edza1 d1gpja2  
d1vi2a1 d1p77a1 d1nyta1 d1b0aa1 d1v16a1 d1v91a1 d1etob\_ d1umqa\_  
d1g2ha\_ d1kola2 d1f8fa2 d1qora2 d1jqba2 d1cdoa2 d1gu7a2 d1d1ta2  
d1xa0a2 d2dm6a2 d1jvba2 d1rjwa2 d1llua2 d1h2ba2 d1tt7a2 d1piwa2  
d1o89a2 d1liz0a2 d1e3ja2 d1yb5a2 d1uufa2 d1vj1a2 d1e3ia2 d3gpdg1  
d1vc2a1 d2nvwa1 d1u8fo1 d1ydwa1 d1hdgo1 d2g17a1 d1cf2o1 d2czca2  
d1r0ka2 d1obfo1 d2cvoa1 d1ebfa1 d1h6da1 d1i32a1 d1zh8a1 d2q49a1  
d1qkia1 d3pzra1 d1xeaa1 d1vkoa1 d1vm6a3 d3qvsa1 d2pkqo1 d1b7go1  
d1gr0a1 d1p1ja1 d1lc0a1 d1j0xo1 d3pwka1 d2hjsa1 d1zyao1 d1vkna1  
d1tlta1 d1nvmb1 d3sjua\_ d3ojfa1 d1xu9a1 d2jjya1 d1n7ha\_ d1y1pa1  
d1h5qa\_ d1jtva\_ d4fs3a\_ d2bkaa1 d1gy8a\_ d2c5aa1 d1ulsa\_ d1ooea\_  
d2b69a1 d1y5ma1 d1spxa\_ d1aela\_ d1bxka\_ d1ydea1 d1gega\_ d1hdoa\_  
d1o5ia\_ d1e6ua\_ d1snya1 d2rhca\_ d3zv4a\_ d5ceja\_ d2d1ya1 d1fjha\_  
d3w8ea\_ d2fmua1 d1x1ta\_ d1rpna\_ d3ay7a1 d1k2wa\_ d1eq2a\_ d2hrba1  
d3ruaa\_ d2ew8a1 d4hwka\_ d1xgka\_ d2bd0a1 d1yo6a1 d2a35a1 d2ntva\_  
d1v18a\_ d1hdca\_ d4bkua\_ d2ag5a1 d2q45a\_ d1nffa\_ d4iy1a\_ d1zbqa1  
d1kewa\_ d1ek6a\_ d1ja9a\_ d2q46a2 d1iy8a\_ d1cyda\_ d2ptga\_ d1hxha\_  
d1uzma1 d3lyla\_ d4m89a\_ d3wyea\_ d2b11a1 d1w6ua\_ d1sb8a\_ d2q2va\_  
d4nr0a\_ d1e6wa\_ d2gasa\_ d3oiga1 d2bgka1 d1mxha\_ d1v10a1 d1rkxa\_  
d1r6da\_ d1wmaa1 d1e7wa\_ d2c07a1 d1xkqa\_ d3tzha\_ d1g0oa\_ d3lz6a\_  
d1qyca\_ d1ledoa\_ d1oc2a\_ d1t2aa\_ d1zema1 d2xoxa\_ d1z45a2 d1geea\_  
d1p33a\_ d3lt0a\_ d4e6pa\_ d2wyua\_ d1db3a\_ d4q9na\_ d1xhla\_ d4o1ma\_



d1fmca\_ d2uvda\_ d2gdza1 d1uaya\_ d2z1ma\_ d2o23a2 d2fr1a2 d2fr1a1  
d1qsga\_ d1qyda\_ d4zjua\_ d2a4ka1 d1ybla\_ d1wvga1 d1yxma1 d3f4ba\_  
d1mg5a\_ d1xg5a1 d1r55a1 d3gboa\_ d1atla\_ d1kufa\_ d1buda\_ d4q1la\_  
d1yp1a\_ d1wnia\_ d2gfoa1 d1vjva\_ d2ayna1 d3nhea\_ d3nqyb\_ d4gera\_  
d1bqba\_ d1ex0a4 d1g0da4 d2f4ma1 d1x3za\_ d3ioqa\_ d1fh0a\_ d1o0ea\_  
d1m6da\_ d2cb5a\_ d1cs8a\_ g8pch.1 d1s4va\_ d2pnsa\_ d1vsna1 d1mira\_  
d1iwda\_ d2oula\_ d7pcka\_ d3bwka\_ d3bcna\_ d2p86a\_ d1pvja\_ d1pcia\_  
d1gece\_ d1deua\_ d4bs6a\_ d1xkga1 d1cqda\_ d1jqpa2 d2c0ya\_ d2bdza\_  
d3p5ua\_ d2o36a\_ d1k9xa\_ d1zoya1 d1qo8a2 d1d4ca2 d1jnra2 d1kf6a2  
d2jk6a2 d2jk6a1 d1feca1 d1feca2 d1lpfa1 d1lpfa2 d1xhca1 d1xhca2  
d1dx1a2 d1dx1a1 d1gera2 d1m6ia2 d1onfa1 d1onfa2 d3lada2 d3lada1  
d1w4xa1 d1w4xa2 d1gesa2 d1mo9a1 d1xdia1 d1fl2a2 d1fl2a1 d1fcda1  
d1fcda2 d1h6va2 d1h6va1 d1mo9a2 d1gv4a2 d1gv4a1 d2gv8a2 d2gv8a1  
d1aoga1 d1aoga2 d1hyua1 d1ebda1 d1ebda2 d3dk9a1 d1qlra2 d1qlra1  
d1gesa1 d1zbf1a1 d2z1ha\_ d2etja1 d3qioa1 d1j11a\_ d2e4la\_ d1j12a\_  
d21sna1 d1uaxa\_ d2yv0x\_ d1mu2a1 d1lekea\_ d1i39a\_ d1pn0a1 d1reoal  
d1ju2a1 d2f5va1 d3c96a1 d2gmha1 d1pj5a2 d1gpea1 d1o5wa1 d1n4wa1  
d1k0ia1 d2dw4a2 d2ivda1 d2voua1 d1kdga1 d1s5ja1 d2hbja2 d2igia\_  
d1wlja\_ d1qhta1 d4dlea1 d1tgoa1 d2f96a1 d3tr8a1 d3mxma\_ d1q8ia1  
d1y97a1 d1w0ha\_ d1kfsa1 d2py5a1 d1d5aa1 d1yt3a3 d2guia\_ d3mwpal  
d4kb1a\_ d1lid1a\_ d2hmta\_ d1lssa\_ d1liv0a\_ d1nu0a\_ d2v76a\_ d1wj1a1  
d1qqga2 d1qqga1 d1ntva\_ d1n3ha\_ d4dbba\_ d3f0wa1 d1p3ra\_ d1wgua1  
d2cy4a1 d3hqca\_ d1wvha1 d1xr0b1 d2av4a1 d3nvva1 d2h88b1 d1n62a2  
d1t3qa2 d1kf6b2 d1zoyb1 d1jq4a\_ d1ffva2 d1dgja2 d1rm6c2 d1r7ha\_  
d1faaa\_ d1wika1 d1xfla\_ d1ttza1 d2f51a1 d1ti3a\_ d1nhoa\_ d1sena\_  
d2i4aa\_ d1ep7a\_ d1zmaa1 d1fo5a\_ d3lefa1 d3diea1 d2yana1 d1z6na1  
d1oaza\_ d3zywa1 d4aj8a\_ d1nm3a1 d4fiwa\_ d1wmja\_ d4hs1a1 d1liloa\_  
d1xwaa1 d1wjka1 d2vm1a\_ d1fb6a\_ d1gh2a\_ d1h75a\_ d1nw2a\_ d1kx5b\_  
d3a6na\_ d4m6ba2 d2nqbd\_ d3wkjd\_ d2yfwe\_ d4h9na\_ d5bnxa\_ d1kx5c\_  
d3r45a\_ d1eqzb\_ d4jjnb\_ d1f66c\_ d1eqza\_ d4wnnb\_ d1kx5a\_ d1u35c1  
d1lid3a\_ d2nqbc\_ d1kx5d\_ d1tafa\_ d1bh9b\_ d1tafb\_ d1jfib\_ d1q9ca\_  
d1h3ob\_ d2byka1 d1n1ja\_ d4g92b\_ d1bh9a\_ d1h3oa\_ d2bykb1 d1n1jb\_  
d1pd212 d1nhya2 d2a2ra2 d1k0dd2 d1f2ea2 d1gsua2 d1f3ba2 d2fhea2  
d2pvqa1 d1tw9a2 d1oyja2 d1e6ba2 d1k0ma2 d3ik7a1 d4is0a1 d1r5aa2  
d1jlva2 d1m0ua2 d3gtub2 d1z9ha2 d1okta2 d1axda2 d2gsra2 d1tu7a2  
d1k3ya2 d1zgamma1 d1b48a2 d1gnwa2 d1gwca2 d2gsta2 d1glqa2 d1oe8a2  
d1pn9a2 d1v2aa2 d1fw1a2 d1duga2 d1iqca2 d1iqca1 d1eb7a2 d1eb7a1  
d1nmla2 d4ilya\_ d4olta\_ d1qgia\_ d1txga2 d3f47a1 d1mv8a2 d2pv7a2  
d1xc2a3 d2ahra2 d4xiya1 d2f1ka2 d1pgja2 d1i36a2 d1np3a2 d1lj8a4  
d1teaa3 d1qmga2 d2i76a2 d2g5ca2 d1wdka3 d1dlja2 d3cuma3 d1gd6a\_  
d1f6ra\_ d1livma\_ d2gv0a\_ d1iiza\_ d2z2fa\_ d1j8xa\_ d1ghla\_ d1b9oa\_  
d3w3ea\_ d4tx7a\_ d3cq1a\_ d4msta\_ d3iwra\_ d2z37a\_ d4dyga\_ d2za0a\_  
d2c21a1 d1f9za\_ d1mpya2 d1kw3b2 d4ghga1 d1tfza1 d3isqa1 d3isqa2  
d1sqia1 d1sqia2 d1lkda2 d1lkda1 d1mpya1 d1cjxa2 d1cjxa1 d1sp9b2

d1t47a1 d1t47a2 d1f1ua2 d1sp8a1 d1sp8a2 d1f1ua1 d1ro5a1 d1s5ja2  
d1qhta2 d4dlea2 d1tgoa2 d3py8a2 d1q8ia2 d2py5a2 d1d5aa2 d1qsta\_  
d2beia1 d4m3sa\_ d1u6ma1 d1ygha\_ d1yk3a1 d3dr6a\_ d1xmta\_ d1z4ea1  
d2ge3a1 d1bo4a\_ d2fiaa1 d2jdca1 d1y9wa1 d3to7a\_ d1wwza1 d2f14a1  
d2ozua1 d2b5ga\_ d2cy2a1 d2p0wa\_ d1cm0a\_ d4pswa\_ d1yrea1 d1yr0a1  
d1m4ia\_ d2gana1 d1yvka1 d1ghea\_ d2g3aa1 d1y7ra1 d2euia1 d1q2ya\_  
d2fsra1 d1xeba\_ d2ae6a1 d1cjwa\_ d1qsm\_ d2aj6a1 d1y9ka1 d1i12a\_  
d1vkca\_ d2atra1 d1n71a\_ d2d4pa1 d2fiwa1 d2fe7a1 d1tiqa1 d2ou2a\_  
d1yx0a1 d2fcka1 d1p0ha\_ d2j8ma\_ d2pq8a\_ d1z4ra1 d1s3za1 d1ufha\_  
d1dosa\_ d3qm3a1 d2fjka\_ d1xvqa1 d1pn0a2 d3hy2a\_ d2cvba1 d1o8xa\_  
d1lu4a\_ d1we0a1 d2bmx1 d2a4va1 d1psqa\_ d1xiya1 d1q98a\_ d1n8ja\_  
d1zofa1 d2ggta\_ d3tjja\_ d4je1a1 d1o73a\_ d3s9fa\_ d2zcta\_ d1qmva\_  
d1jfua\_ d2b1ka\_ d5dvba1 d2b5xa1 d2v2ga\_ d1st9a\_ d3tb2a\_ d4llra\_  
d4fh8a1 d1e2ya\_ d1knga\_ d2h30a\_ d1i5ga\_ d2z9sa\_ d2f8aa1 d1tp9a1  
d2b7ka\_ d1nm3a2 d3hvva\_ d2wfca1 d4kcea\_ d1xvwa1 d4gqca1 d3qpma\_  
d4k1fa\_ d1zzoa1 d1gp1a\_ d1prxa\_ d2qked\_ d4ksoa\_ d1t4za1 d1wwja\_  
d1e88a1 d1l6ja5 d1l6ja4 d1eaka3 d1l6ja3 d1h8pa2 d1h8pa1 d1etha2  
d1w52x1 d2pp1a1 d1hpla2 d1lpbb2 d2oxea1 d1bu8a2 d1rpla2 d1ysl1\_  
d4hs9a\_ d1ex9a\_ d1ku0a\_ d3qmma\_ d1bnla\_ d1dy2a\_ d1ra6a\_ d1muka\_  
d3gsza\_ d1khva\_ d1te9a\_ d2xwha\_ d3uqsa\_ d3hkwa\_ d3n6ma\_ d2cjqa\_  
d2xyma\_ d1teba\_ d1te8a\_ d1s48a\_ d1u09a1 d4wfxa\_ d3tyqa\_ d2pgga1  
d4qmea2 d2xdta2 d1z5ha2 d4wfia\_ d4cg1a1 d3visa\_ d1cr6a2 d1c4xa\_  
d1j1ia\_ d2rhwa\_ d3groa\_ d1pjaa\_ d1ei9a\_ d1svpa\_ d1mbma\_ d3su6a1  
d1cula1 d4agka\_ d1vcpa\_ d1q31a\_ g1n11.1 d3e90b\_ d3u1jb\_ d3zxha\_  
d1cgl1a\_ d1rm8a\_ d1eaka2 d1hy7a\_ d2jsda\_ d1cxva\_ d1hv5a\_ d1i76a\_  
d1eb6a\_ d3p0ya1 d1igra1 d1igra2 d1n8yc2 d1n8yc1 d1m6ba2 d1m6ba1  
d4dv8a2 d1j7na1 d1m4la\_ d2bk7a\_ d3fjua\_ d1z5ra1 d1kwma1 d1uwya2  
d1jqga1 d2c1ca1 d1dtda\_ d1h81a2 d1ohfc\_ d2tbvc\_ d1c8nc\_ d1x36a\_  
d1smvc\_ d1ng0c\_ d4sbvc\_ d1f2nc\_ d1cixa\_ d1y29a\_ d1v7fa\_ d2jtba\_  
d1d1ha\_ d1g9pa\_ d1lupa\_ d1qk7a\_ d1mb6a\_ d2a2va\_ d1niya\_ d1i25a\_  
d2mpqa\_ d1ie6a\_ d1kqha\_ d1la4a\_ d2mxoa1 d1d10a\_ d1koza\_ d1qk6a\_  
d1emxa\_ d1lqra\_ d1c6wa\_ d1rmka\_ d1ixta\_ d1eyoa\_ d1cna\_ d1glpa\_  
d1f3ka\_ d1fyga\_ d1rypd\_ d1irua\_ d1rypc\_ d3unfk\_ d1rypa\_ d1j2pa\_  
d1irui\_ d1j2qh\_ d3unfh\_ d1m4ya\_ d1rypb\_ d1irul\_ d1irug\_ d1iru2\_  
d1q5rh\_ d1rypg\_ d1g3ka\_ d1iruf\_ d1q5qa\_ d1e94a\_ d1irub\_ d1ryph\_  
d3ty6a\_ d1iruj\_ d1iruk\_ d1rype\_ d1irud\_ d1irue\_ d3mi01\_ d1rypf\_  
d1iruh\_ d2z3ba\_ d3mka2\_ d1irul\_ d1ny721 d1ny722 d1a6ca3 d1a6ca2  
d1a6ca1 d1pgl22 d1pgl21 d1pgl11 d1ofda3 d1ea0a3 d1ecfa2 d1q15a2  
d1ct9a2 d1ao0a2 d1te5a\_ d1y14b1 d2nn6i1 d1i941\_ d2zjra2 d1smxa\_  
d2qamc2 d1hh2p1 d2r7da1 d1r12a2 d1wfga1 d3bzka4 d1x6oa2 d3a0ja\_  
d2j01d2 d2ja9a1 d4q15a\_ d1hr0w\_ d1luza\_ d2n3sa\_ d2vnud1 d1h95a\_  
d1go3e1 d2nn6h1 d1ne3a\_ d2mo1a\_ d1iz6a2 d1jjga\_ d1e3pa2 d2ix0a3  
d2ix0a2 d2lxja\_ d1ueba3 d1ueba2 d2z0sa1 d1u01a1 d2ix0a1 d2eifa2  
d2je6i1 d3i2za1 d2c35b1 d2ahob2 d1t9ha1 d3i4oa\_ d2qall1 d1jt8a\_

d2nn6g1 d1g6pa\_ d3cama\_ d1i94q\_ d1c9oa\_ d1d7qa\_ d2ba0a1 d2vnud2  
d2vnud3 d2qalq1 d1wi5a1 d1xtda2 d1ny4a\_ d4w9ta\_ d1jvna1 d4x2ra1  
d1qo2a\_ d4axka1 d1thfd\_ d1h5ya\_ d4u28a\_ d2y88a\_ d4wd0a\_ d1vzwa1  
d3exra\_ d2ffca1 d2fdsa1 d3n3ma1 d2czda\_ d1q6oa\_ d2yyua\_ d1vqta1  
d1dbta\_ d3ldva1 d41t9a1 d3tc7a1 d3hoja\_ d1i4na\_ d3vnda\_ d3n18a1  
d1geqa\_ d3naval d4a2ra1 d3tc6a1 d1ujpa\_ d4ijba\_ d1xcfa\_ d1vc4a\_  
d1rd5a\_ d1qopa\_ d3b5va\_ d2r80b\_ d1cqxa1 d1cg5a\_ d1gcvb\_ d3boma\_  
d2h8fb\_ d2raoa\_ d3bj1a\_ d4hrrb\_ d2r50a\_ d3d1kb\_ d2aa1b1 d3zhwa\_  
d3hf4b\_ d3gdja\_ d1jebb\_ d3bj1b\_ d1x9fb\_ d1wmub\_ d1gcva\_ d3bcqb\_  
d3d4xb\_ d1gvha1 d2dc3a\_ d3hf4a\_ d4yu3a\_ d3k8ba\_ d1qpwb\_ d2r80a\_  
d3bcqa\_ d1v4wa\_ d3wtgb\_ d1j17a\_ d4esaa\_ d1a9we\_ d3d1ab\_ d1fsla\_  
d4h21a\_ d1v4wb\_ d1mwca\_ d1vhba\_ d1jeba\_ d1spgb\_ d1h97a\_ d1q1fa\_  
d1tu9a1 d3d1aa\_ d1hdsb\_ d3hyub\_ d2zffb\_ d3fs4a\_ d1oj6a\_ d1shrb\_  
d4h21b\_ d4yu3b\_ d1spga\_ d3hrwa\_ d3qqra\_ d3at5a\_ d4wchd\_ d3hyua\_  
d1cg5b\_ d1uc3a\_ d1hbra\_ d2raob\_ d1outb\_ d4esab\_ d3gdjb\_ d3qqqa\_  
d1x9fc\_ d3vrfa\_ d1litha\_ d3mkba\_ d3d4xa\_ d3mjpa\_ d1j16a\_ d3fh9a\_  
d1outa\_ d2dc3b\_ d1it2a\_ d3eoka\_ d3g46a\_ d1qpwa\_ d3vrfb\_ d1ch4a\_  
d1x9fd\_ d1hdsa\_ d2zffa\_ d3mkbb\_ d1or4a\_ d3wtga\_ d1a4fa\_ d3fh9b\_  
d3bomb\_ d3cy5a\_ d3at5b\_ d1x9fa\_ d2oifa\_ d4lmbx\_ d1cpcb\_ d3v57a\_  
d1kn1a\_ d1cpca\_ d4f0ta\_ d2vjha\_ d4po5b\_ d1eyxa\_ d1alla\_ d4f0tb\_  
d1b33b\_ d1b8db\_ d4h0mb\_ d1b33a\_ d2vjhb\_ d4lm6b\_ d2vmlb\_ d1allb\_  
d2vjta\_ d3dbja\_ d2vmla\_ d2vjtb\_ d4f0ub\_ d1f99b\_ d4rmpa1 d1liaa\_  
d1eyxb\_ d2uulb\_ d4lmsb\_ d4f0ua\_ d2bv8a\_ d1f99a\_ d2bv8b\_ d2c71b\_  
d3dbjb\_ d4rmpb1 d1b8da\_ d4h0ma\_ d3v57b\_ d1liab\_ d2uula\_ d2j96a\_  
d1azwa\_ d1k8qa\_ d2xqfa\_ d1ea5a\_ d1f6wa\_ d1dx4a\_ d1qe3a\_ d1k4ya\_  
d4qwwa\_ d2ha2a\_ d2h0ba\_ d2erfa\_ d1h30a1 d3mw4a1 d1pz7a\_ d2r1ba\_  
d3v64a1 d1d2sa\_ d3bopa1 d3mw3a1 d1okqa1 d1okqa2 d4iuaa3 d4bvva\_  
d5hpga\_ d3k65a\_ d1ki0a3 d1ki0a2 d1ki0a1 d1a0ha1 d1pmla\_ d3sp8a3  
d2feba1 d1xova2 d1f74a\_ d3l21a\_ d2elda\_ d1to3a1 d1w3ia\_ d1sfla\_  
d1n7ka\_ d1vcva1 d4imea\_ d1wa3a\_ d2ocza1 d1f2ja\_ d3m16a\_ d2yxga\_  
d3a5fa\_ d1fbaa\_ d1l6wa\_ d1xfba1 d1wx0a1 d1vpxa1 d1ojxa\_ d1mxsa\_  
d2a4aa1 d1xkya1 d3cq0a1 d3s1xa\_ d1f05a\_ d1fdja\_ d3cpra1 d4d2ja\_  
d4mh8a\_ d1mu2a2 d4i7ga1 d3rp2a\_ glucy.1 d1fuja\_ d2zchp\_ d3w94a\_  
d1si5h\_ d1lo6a\_ g2pka.1 d1cgha\_ d1kigh\_ d1a5ia\_ d3s9ba\_ d1hj8a\_  
d1ao5a\_ d2anya\_ d1q3xa1 d1gvza\_ d1azza\_ d4gsoa\_ d2f91a1 d1iaua\_  
d1gdna\_ d1eufa\_ g1fiw.1 d1eq9a\_ d4nfea\_ d2rdla\_ d1spja\_ d1elva1  
d1a7sa\_ d1ekbb\_ d1pfxc\_ d1yc0a\_ d2aiqa\_ g1fiz.1 d1fi8a\_ d4k60a\_  
d4dgja\_ d1mzaa\_ d1lop0a\_ d3tjva\_ d1pytd\_ d1sgfg\_ g1gg6.1 d2eeka\_  
g1rtf.1 d1a0ja\_ d3g01a\_ d1pytc\_ d4e7na\_ d1ddja\_ d1z8ga1 d2hlca\_  
d1npma\_ d1brup\_ g1jou.1 d1sgfa\_ d1autc\_ g2hnt.1 g1kdq.1 d1orfa\_  
d3s69a\_ d4crga\_ d1fxya\_ d1bqya\_ d2ftba\_ d1pmpa\_ d2rcqa1 d4lkpa\_  
d1sa8a\_ d1vyfa\_ d1lpja\_ d3vg7a1 d4azqa1 d1o8va\_ d5bvqa\_ d1p6pa\_  
d2qo4a\_ d1opba\_ d1yiva1 d1o1va\_ d4bvma1 d4tkba\_ d4i3ba\_ d1bwya\_  
d1ftpa\_ d1ggla\_ d4gkca\_ d1cbia\_ d3p6da1 d1kqwa\_ d2a0aa1 d1dzka\_

d4tlja\_ d2a2ua\_ d4wfva\_ d3t1da\_ d4iaxa\_ d3zq3a\_ d2nnda\_ dli4ua\_  
d1bbpa\_ d1kt7a\_ d1lexsa\_ d3s26a1 d1lf7a\_ d1qfta\_ d4gh7a\_ dlz24a1  
d1qabe\_ d1xkia\_ d1ew3a\_ d3bx7a\_ d4iawa1 d1n0sa\_ d1gkab\_ d3kzaa\_  
d2k23a\_ d2l9ca1 d2joza1 d1gm6a\_ d3kffa\_ d3saoa1 d1e5pa\_ d1yupa1  
dliiua\_ d3lgia\_ d3i77a\_ d2z9ia2 d4nsva\_ d1lcya2 d4jca\_ dlagja\_  
dlos8a\_ d1hpga\_ d1l1ja\_ d1qtfa\_ d1e69a\_ d1mv5a\_ d3g60a4 glii8.1  
d1ewqa2 d1ji0a\_ d1v43a3 d2wmfa1 d1vpla\_ d1g2912 d4a82a2 glf2t.1  
d2d62a1 d3tuic1 d2bbsa1 d3g60a3 d2ixea\_ d1g6ha\_ d1sgwa1 d2qi9c\_  
d3rlfa1 d3b60a1 d3d31a2 d2pzea1 glxew.1 d1jj7a\_ d1oxxk2 d2onka1  
d1wlwa\_ d1iwea\_ d1qf5a\_ d1vmaa2 d1nija1 d1np6a\_ d2p67a1 d3ihla\_  
d1okkd2 d1ls1a2 d1s1ma2 d1liona\_ d2v40a\_ d1dj3a\_ d3hida\_ d2vola1  
d2g0ta1 d1vcoa2 d1j8mf2 d1g3qa\_ d1xjca\_ d1p9ba\_ d1qzxa3 dlihua2  
dlihua1 d2qm8a\_ d1dj2a\_ d4ioja\_ d1cp2a\_ d1yrba2 d1hyqa\_ d3gqba2  
d1skye3 d1xp8a1 d1tf7a2 d1tf7a1 d1ye8a1 d1skyb3 d2qe7d2 d4blta\_  
d4huta\_ d3ldaa2 d4hyya\_ d2i3ba1 d1cr1a\_ d3j9tb2 d3ntua2 d1vdza1  
d2z43a\_ d1e9ra\_ d1nlfa\_ d3ziaa2 d1n0wa\_ d3ziad2 d3j9ta2 d1pzna2  
d3gqbb2 d2i49a\_ d1nnfa\_ d1xvxa\_ d1ursa\_ d1iuda\_ d4m1va1 d1twya\_  
d3e13x\_ d2nxoa1 d4pfua\_ d3ttma\_ d1elja\_ d2qmw1 d1us5a\_ d1y3na1  
d1jeta\_ d1uqwa\_ d4f19a1 d2esna2 d3thia\_ d3fasa1 d2uyeb\_ d2xwva1  
d1r91a\_ d2fyia1 d1pb7a\_ d2ozza1 d1sw5a\_ d1nh8a1 d1vr5a1 d2g29a\_  
d1xs5a\_ d3lswa\_ d2z23a\_ d3w9va\_ d3tcha\_ d1q35a\_ d1z7me1 d3q27a\_  
d1p99a\_ d1ve4a1 d2i6ea1 d4mcoa1 d4n8ya\_ d1eu8a\_ d1zbma1 d1hsla\_  
dlixca2 d1j1na\_ d1xvya\_ d1y9ua\_ d2z22a1 d1xoca1 d4oera\_ d1wdna\_  
d5f1qa1 d1xt8a1 d1i6aa\_ d4gwoa\_ d4igta1 d1pc3a\_ d4mmpa1 d1o63a\_  
d2czla1 d2onsa2 d4mija1 d1eh3a\_ d3skpa\_ d1dtza1 d1dtza2 d1ieja\_  
d1jnfa2 d1ce2a1 d1jnfa1 d1b1xa2 d1b1xa1 d1jw1a1 d1jw1a2 d1ryoa\_  
d1h76a1 d1h76a2 d1c4oa1 d2p6ra3 d2p6ra4 d1oywa2 d1oywa3 d1wrba1  
d1w36b2 d1w36b1 d1c4oa2 d3bora\_ d1t6na\_ d2eyqa5 d2eyqa3 d2eyqa2  
d2zu6a2 d1veca\_ d1uaaa1 d1w36d1 d2g9na1 d1z3ix2 d2rb4a\_ d1hv8a1  
d1hv8a2 d1t5ia\_ d1w36c2 d2j0sa2 d2j0sa1 d1fuka\_ d3hjha1 d1z5za1  
d1z63a1 d1s2ma2 d1s2ma1 d1wp9a1 d1wp9a2 d1gm5a3 d1gm5a4 d3dina4  
d3dina3 d1q0ua\_ d1w36c1 d1z3ix1 d1nkta3 d1nkta4 d1uaaa2 d1w36d2  
g1qhh.1 d2fwra2 d2fwra1 d3q3ma\_ d1za0a1 d1mxra\_ d2inca\_ d1jk0a\_  
d2incb\_ d1mhyb\_ d3hf1b\_ d1mtyb\_ d1r2fa\_ d2uw1a\_ d3n37a\_ d1afra\_  
d1oquc\_ d1syya\_ d1mtyd\_ d2o1za\_ d1uzra\_ d1smsa\_ d2fkza\_ d1zujal  
d1s3qa1 d2fjca1 d1z6om1 d1veia\_ d4dyya\_ d1jiga\_ d3gvya\_ d2pyba\_  
d4cy9a1 d3bvfa1 d1r03a\_ d2cf7a\_ d1nf4a\_ d1zs3a1 d4iwka\_ d3ka8a\_  
d3np0x\_ d1lb3a\_ d4e6ka\_ d1z6oa1 d2fzfa1 d4dyua\_ d3ge4a\_ d1jgca\_  
d4am4a\_ d2z6ma\_ d1ji5a\_ d1vlga\_ d1lkoa1 d1krqa\_ d3qz3a\_ d1o9ra\_  
d2ffxj\_ d1euma\_ d1yv1a1 d2v2pa\_ d1j30a\_ d4di0a\_ d1dpsa\_ d2cbia2  
d1gqia1 d2choa2 d1oewa\_ d2qzxa\_ d2asia\_ d1psoe\_ d1miqa\_ d1smra\_  
d2h6ta\_ d1pfza\_ d1izda\_ d3hd8a\_ d1j71a\_ d1dpja\_ d4aa9a\_ d1t6ex\_  
g1b5f.1 g1lya.1 g1htr.1 d1qdma2 d1bxoa\_ d1wkra\_ d1tzsa\_ d1libqa\_  
d2qzwa\_ d1ex4a2 d1bdqa\_ d3ggta\_ d3ixoa\_ d1mrxa\_ d2haha\_ d1tw7a\_

d4njjsa\_ d1sgua\_ d2p3da\_ d1nsoa\_ d3d3ta\_ d2rkfa\_ d1c6ya\_ d2rspa\_  
d3ogpa\_ d3ekwa\_ d2o4na\_ d2j9ja\_ d1baia\_ d3ggua\_ d3lzua\_ d4npua\_  
d4j55a\_ d2r8na\_ d2fxda\_ d2p3ca\_ d4dqea\_ d3ttpa\_ d3t3ca\_ d2p3aa\_  
d2hc0a\_ d2fdda\_ d3mwsa\_ d1k8rb\_ d1wgra1 d1ef5a\_ d1wfy1 d1e8ya3  
d1wgya1 d1lfda\_ d2cs4a1 d1wxma1 d2byeal d3kh0a1 d2byfa1 d1wxaa1  
d1e7ua3 d1wgda1 d1wggal d4q5eb\_ d1wjna1 d1se9a\_ d3n3kb\_ d1wz0a1  
d1we6a1 d2m0xa\_ d2gbka\_ d3rt3b1 d1wh3a1 d1sifa\_ d2ekek2 d4ii2b1  
d4hk2a1 d1c3ta\_ d1m94a\_ d1wgha1 d1ttna1 d1j8ca\_ d1wx8a1 d3v6cb1  
d2ma9b\_ d4i61b1 d1bt0a\_ d2jvca1 d1iyfa\_ d2k1fa\_ d1wxva1 d1wf9a1  
d1t0ya\_ d2io0b2 d1x1ma1 d2gbma\_ d1zw7a1 d2m17a\_ d1we7a1 d2lwp\_a\_  
d2gbja\_ d1wjua1 d1v6ea1 d1v86a1 d4eewa\_ d1wiaa1 d4icva\_ d4gu2a\_  
d1wx7a1 d1wy8a1 d4hjka1 d2faza1 d1v5oa1 d1lgya\_ d4l3wa\_ d1llfa\_  
d1gz7a\_ d1lukca\_ d2bcgg1 d2bcgg2 d1dszb\_ d1a6ya\_ d3cbb\_a\_ d1ynwa1  
d1r4ia\_ d1hcqa\_ d2hana\_ d2hanb\_ d2enva1 d1kb4b\_ d2n11b\_ d1lo1a\_  
d1cita\_ d1um8a\_ d1qvra2 d1qvra3 d1qzma\_ d1sxjc2 d1jr3d2 d2p65a\_  
d1l8qa2 d1g8pa\_ d3hu3a3 d1sxjd2 d1njfa\_ d1in4a2 d1sxja2 d1tuea1  
d2ce7a2 d1w5sa2 d1sxjb2 d1d2na\_ d1ny5a2 d1ofha\_ d2gnoa2 d2a5yb3  
d1fna2 d1u0ja1 d1lv7a\_ d1liqa2 d2fnaa2 d1ixsb2 d4gita\_ d1sxje2  
d1g41a\_ d2e3fa\_ d2e3ea\_ d2l1da\_ d2ny8x\_ d2e3ga\_ d2ny9x\_ d2nz3a\_  
d2l7a\_ d2m8bb1 d2kyqa\_ d3psma\_ d1jkza\_ d1jxca\_ d2g11a\_ d1ugla\_  
d4uj0a\_ d2k4ua\_ d1hp2a\_ d2lu9a\_ d1baha\_ d2meoa1 d1wm7a\_ d1hlya\_  
d1n8ma\_ d1j1za\_ d1wpda\_ d1c55a\_ d1pvza\_ d1wt7a\_ d1rjia\_ d1wz5a\_  
d1m2sa\_ d1pjva\_ d1c49a\_ d1qkya\_ d2ktca1 d1wmta\_ d1du9a\_ d1j5ja\_  
d1r1ga\_ d1e3oc2 d1ic8a2 d1t0za\_ d2i61a\_ d1t1ta\_ d1sn4a\_ d1kv0a\_  
d2lkba\_ d1npia\_ d1wwna\_ d1pe4a\_ d2kbka\_ d2li7a\_ d2kbha\_ d1dq7a\_  
d1sega\_ d1omya\_ d1zywa1 d1jzaa\_ d2jca\_ d1n9wa1 d1bbua1 d1c0aa1  
d1b8aa1 d1l0wa1 d3a74a1 d1eova1 d1iyjb4 d1iyjb5 d1iyjb3 d1o7ia\_  
d4ipca1 d1x3ea\_ d4apva\_ d1jb7a1 d1jb7a2 d1jb7a3 d3kdfa\_ d1ue1b\_  
d1wjja1 d3eiva\_ d1xjva2 d1xjva1 d2ccza2 d1se8a\_ d1l1oc\_ d1jb7b\_  
d1qvca\_ d3ulla\_ d1qzga\_ d1mia4 d1mia5 d1mia3 d3ubub\_ d1legia\_  
d1qo3c\_ d1v7pa\_ d1tdqb\_ d3ubua\_ d1c3ab\_ d1h8ua\_ d3bx4b\_ d1t8ca1  
d1sb2a1 d1qdda\_ d2ziba1 d3cada\_ d1byfa\_ d1j34b\_ d1jwia\_ d1jzna\_  
d1c3aa\_ d1wmza\_ d3bdwb\_ d1hq8a\_ d1fifa1 d1dv8a\_ d3hupa\_ d1wk1a1  
d1umra\_ d2afpa\_ d3bx4a\_ d1gz2a\_ d1sl6a\_ d1v7pb\_ d3g8ka\_ d1lixa\_  
d1j34a\_ d1jwib\_ d1g1sa1 d1y17a1 d1ja3a\_ d1fvub\_ d3bdwa\_ d1sb2b1  
d1fvua\_ d1umrc\_ d1oz7a\_ d4m17a\_ d3cfwa1 d1ypqa1 d1g1ta1 d3fd4a\_  
d3l9jc\_ d4dn8a1 d1v41b\_ d1rd11\_ d2msba\_ d1dgsa2 d1fvia1 d1p16a1  
d1x9na2 d1rpma\_ d2shpa1 d1yfoa\_ d1l8ka\_ d2ooqa1 d1g4us2 d1p15a\_  
d1lara2 d1lara1 d1wcha\_ d2fh7a2 d2fh7a1 d1ohea1 d1ohea2 d2f4da\_  
d1rxda\_ d2hxpa\_ d1xria\_ d1d5ra2 d1fpza\_ d3ezza\_ d4y2ea\_ d1i9sa\_  
d3azya\_ d3wvja\_ d1upsa1 d1ajoa\_ d2hyka\_ d1ajka\_ d2vy0a\_ d1o4ya\_  
d3o5sa\_ d3d6ea\_ d3atga\_ d1dypa\_ d1umza\_ d3i4ia\_ d1tdha3 d1q3ba3  
d1ee8a3 d1k82a3 g1qmo.1 g1len.1 d3zyra\_ d1fnya\_ g2ltn.1 d1avba\_  
d3usua\_ d1dhkb\_ d1f9ka\_ d1lukga\_ d1g8wa\_ d1g9fa\_ d1wbf\_a\_ d3wcsa\_

d1g7ya\_ g1loe.1 d1mvqa\_ d1hq1a\_ d1v6ia\_ d1dbna\_ d1qnwa\_ d1fx5a\_  
d4l8qa\_ d1ioaa\_ d3n35a\_ d3h33a\_ d1rwja\_ d19hca\_ d1os6a\_ d3bxua\_  
d3h4na\_ d1i77a\_ d3caoa\_ d1j0pa\_ d2ctha\_ d1duwa\_ d1ofwa\_ d2e84a\_  
d1hh5a\_ d3h34a\_ d1wioa4 d1ccza2 d1dr9a2 d1ic1a1 d2d9qb1 d2nxyb2  
d1adqa1 d1fnga1 d1uvqb1 d1zs8a1 d2vola1 d2vola2 d1mfb12 d2jelh2  
d1uwe12 d3qq4b1 d1kjvb\_ d1k5na1 d1osph2 d4odh12 d1ow0a1 d1ow0a2  
d1bfob2 d3l9ra2 d3jtth1 d2fath2 d4elkb2 d1fn4b2 d2xfxb\_ d1pg7x2  
d1cqka\_ d4k71b2 d1lk2a1 d1eapb2 d4lfhg2 d1i4fa1 d2nw2a2 d1kfah2  
d1mhca1 d1h3ua1 d1wejh2 d1h0db2 d1a5fh2 d1kcvh2 d1mjuh2 d1qqda1  
d1kcrh2 d1k8ia1 d3huja2 d2nnab1 d1nfd2 d3mffb2 d1s9va1 d1lk3h2  
d1q0x12 d1fv1b1 d1neza1 d4rfeb2 d1r3ha1 d1a6tb2 d1kjva1 d1pz5b2  
d1onqa1 d2bc4a2 d1de4a1 d1k8da1 d1tcra2 d1dn0b2 d1nfd2 d2xwtb2  
d1bfoa2 d1mexh2 d1iakb1 d1ypzf2 d4f7ea2 d1q7212 d2fbjh2 d1fe8h2  
d1clzh2 d1fngb1 d1uvqa1 d1vgka1 d1c16a1 d4j12a2 d4x99b2 d1igtb3  
d1je6a1 d1q72h2 d1nldh2 d1teth2 d2hmic2 d1ilca2 d1ilca1 d1k8ib1  
d1q0yh2 d1kfal2 d3frua1 d1pg7w2 d1u58a1 d1igyb4 d1igyb3 d1hyrc1  
d1klub1 d1deeb2 d1c12b2 d2bc4b2 d2ig2h2 d1kcv12 d3wn5b1 d1lk2b\_  
d1lk312 d1mjul2 d1sm3h2 d1q0xh2 d1zvsal d1ydpal d1u8ib2 d1ypze2  
d1kcu2 d1op9a\_ d1y0la1 d1etzb1 d1egj11 d2gsib1 d1nj9a1 d4jfhd1  
d1aqk11 d1t2ja\_ d1lo4h1 d1zvya1 d3v4v11 d4enec1 d1kxtb\_ d5e8ea1  
d2pxya\_ d4weud\_ d1xiwc\_ d2esvd1 d1qznh\_ d1logae1 d1f4xh1 d4n1hb\_  
d3ezjb1 d3mlw11 d1kfah1 d1etza1 d1b4jh1 d3cfic\_ d4w68a\_ d2arja1  
d1ek3a\_ d2ok011 d1vera\_ d1uwgh1 d1blnb1 d1fpth1 d1rzga1 d2giya1  
d4m3kb1 d1nc2a1 d2nyyd1 d1ncna\_ d1fbih1 d5dxwa\_ d4fqqa1 d1dqdh1  
d1jfq11 d1kelh1 d1faih1 d1frgl1 d1figl1 d4m6n11 d1fo0a\_ d4hxb11  
d3b5ga\_ d3quyd1 d2h9gb1 d1i8kb\_ d2dd8h1 d2ck0h1 d1eaja\_ d4w6wb1  
d2a6ib3 d1t66d1 d2e27h\_ d1ob1b1 d1f11b1 d2v7na1 d1ad0a1 d2xt1b1  
d1pskh1 d4i13b1 d2op411 d1a0q11 d1uwe11 d1za3a1 d1ncb11 d4uu9a\_  
d1bm3h1 d1cloh1 d1nqba2 d1cf8h1 d4y5va\_ d1mhph1 d5anma1 d4cdgc1  
d4ldeb\_ d1y0lb1 d2pcpb1 d1z3g11 d1dfb11 d1fh5h1 d3g5xa1 d1tzib1  
d4dn311 d3zhka1 d2b1hh1 d2uyla1 d1f3dh1 d1nj9b1 d2agjh1 d2h1pl1  
d1q72h1 d8fabb1 d1ndmb1 d1rjca1 d4u6hb1 d3upca\_ d2fbj11 d1osph1  
d1tvda\_ d2cjvh\_ d4fhbd1 d1bd2d1 d1rz7h1 d3nn8a\_ d1blna1 d1knoa1  
d1nfd1 d2bmkb1 d1dq11\_ d1igyb1 d1igf11 d12e8h1 d3utza1 d1nc2b1  
d1rihh1 d4mwfb1 d4jvpa1 d1mieh1 d1rhfa1 d1fgn11 d1sbsh1 d1lp9e1  
d1dn0a1 d4lqf11 d1iaih1 d1kgcd1 d1mh5b1 d1gpol1 d2g60h3 d1f8t11  
d2jixd1 d4grwh\_ d1fo0b\_ d1bfob1 d1axsa1 d1u9ka\_ d1nmbh\_ d1h8na1  
d1h8na2 d1jguh1 d4eura1 d3sdy11 d35c8h1 d1w7211 d1mvub\_ d1i9rh1  
d1ob1a1 d4wenb\_ d1yeeh1 d3ietc1 d1f58h1 d1ad0b1 d1mqkl\_ d1nbvh1  
d4b50a\_ d3r8bb\_ d1baf11 d1mamh1 d4rgne1 d2gsgb\_ d35c811 d1bafh1  
d1ailh1 d2pcpa1 d2fath1 d2x1pa\_ d1orsb1 d1libg11 d1shma\_ d1a2yb\_  
d1u0qa\_ d2coqa\_ d1hilb1 d1qfwi\_ d1jv5b\_ d1fn4b1 d5e0qa\_ d1nsnh1  
d1plgl1 d4ocx11 d1kb5h1 d1rzfh1 d1pg7x1 d2fx7h1 d2oi9c\_ d1l7il1  
d3eyva1 d1d5il1 d4ffyl\_ d1tet11 d1a6wh\_ d1ac6a\_ d3dvfa\_ d1nfd1

d1mimh1 d1ri8a1 d1jhlh\_ d3dura\_ d1fskb1 d1f97a1 d3so3b1 d2ak4d1  
d1lp9f1 d4z7wf1 d1l7th1 d4y5ya\_ d4x7ec1 d1emth1 d1ikfl1 d1nlbh1  
d4uta11 d1bjma1 d1eapb1 d1u6ah1 d2dtgd1 d1kj2b\_ d1xeda1 d1c1eh1  
d1fgvh\_ d2bnub1 d2fb4h1 d2dtgb1 d1ktrh\_ d1jpth1 d1qkz11 d4hepg\_  
d2atpb1 d1flrh1 d2hrp11 d1mvfa\_ d1iaim1 d3k80a1 d2jb5h1 d3zkxc\_  
d4grwe\_ d1it9h1 d1rhhb1 d3w9ec\_ d1e4wh1 d1sy6h1 d2j6eh1 d3qxta\_  
d1jglh1 d1p7ka1 d1tzhb1 d4n8pa1 d1gaf11 d2jelh1 d1wioa2 d4i0cc1  
d1cicb1 d1lmka2 d1lmka1 d1iqwh1 d1orqb1 d1ejoh1 d1jnlh1 d4zgl1a\_  
d43c9b\_ d1ggbl1 d1wejh1 d3q6fa1 d1f3dj1 d3c61a1 d1bqlh1 d3p9wb\_  
d1a3r11 d1h0db1 d2uzil\_ d1eo811 d1qfw1\_ d1n7m11 d1igja1 d1c5ch1  
d2a9mh\_ d1rmfh1 d1fj1b1 d4heme\_ d1ccza1 d1a5fh1 d1ogad1 d1dlfh\_  
d1qa9b\_ d1vgel1 d3qskb\_ d1sjxa\_ d4ozfg1 d1sq2n\_ d1qd0a\_ d1kcvh1  
d1c5db1 d3qcul1 d8faba1 d3bn9d1 d1mjuh1 d4y8dc\_ d7fabh1 d3dvgb1  
d1l0011 d1a6tb1 d1gigh1 d1kcrh1 d2hwz11 d1yjdc1 d3clfl1 d4krna\_  
d1d171\_ d1e6o11 d1mexh1 d3r0ma\_ d4kkna\_ d1fns11 d1oaqh\_ d1rzia1  
d1ucbh1 d1ncw11 d4b41a\_ d1nfd1 d2mpah1 d2d7t11 d4grwf\_ d4b5ea\_  
d1l1k3h1 d3u79a\_ d4u3xa\_ d1ghf11 d1bvkb\_ d1mcw11 d1b88a\_ d1jrhh1  
d32c2b1 d4wemb\_ d1dsfh\_ d1op3h1 d1ce111 d1iqda1 d1qoka1 d1qoka2  
d1qfuh1 d2crya1 d1ay1h1 d1oaql\_ d3ab0b\_ d1rur11 d1t4kb1 d1bz7b1  
d1n0xh1 d1for11 d1ucb11 d4w6yb\_ d43c9a\_ d2aab11 d1tzia1 d4n1ca\_  
d1k6qh1 d3g9ab\_ d4tvsa1 d1ligmh\_ d1pz5b1 d3dx9a1 d3wxwh\_ d1nakh1  
d1kcull1 d3eaka\_ d4qlra1 d1cr911 d1d9ka\_ d1f4x11 d1deea1 d2i27n2  
d1c12a1 d2orb11 d1j8hd1 d1mcph1 d1c5da1 d1kenh1 d1bd2e1 d1h5ba\_  
d4x7fc1 d3upaa\_ d1t3fa1 d1indh1 d2dtgc1 d4hc111 d1zv5a1 d4wgvb\_  
d1uwg11 d4f37k1 d1aqkh1 d1vesa\_ d3zkqd\_ d1fpt11 d1l0411 d1knob1  
d3rrqa\_ d1ct8b1 d4orz\_ d1mlbb1 d4hgkc1 d1dqd11 d1bogb1 d4ozhe1  
d1dr9a1 d1i7za1 d1dn0b1 d1kell1 d1rzib1 d1ypzf1 d1wtla\_ d1hkfa\_  
d1fail1 d1figh1 d2vyre\_ d1sjva\_ d1ohqa\_ d1bfoa1 d1pkqb1 d1mjul1  
d1b4j11 d1nsl1 d2arjb1 d1p4bh\_ d4aj0a\_ d3nn8b\_ d2rcja1 d1f2xk\_  
d4v1dd\_ d1adqh1 d2eksa\_ d4k3ga\_ d1jfqh1 d1uweh1 d1frgh1 d4gftb\_  
d1uz8b1 d4n1lea\_ d1bm311 d1clo11 d3mcka1 d2vq1a1 d1ae6h1 d4aq1b1  
d1uj3b1 d1nbqa1 d1fh511 d2ck011 d2ywza\_ d1q7211 d4nxbx\_ d1hila1  
d4hzb1 d2j8811 d1zmya1 d1cd0a\_ d1a4ka1 d1psk11 d1a0qh1 d4krmb\_  
d1ncbh1 d2fbjh1 d1j8he1 d1i3ua\_ d1cf811 d1fe8h1 d2p1ya1 d2x89a\_  
d1o10a\_ d2r0lh1 d1ub5a1 d1dfbh1 d3eyvb1 d4jdvb1 d4p2cg\_ d2gsia1  
d2agj11 d1u3ha1 d2h1ph1 d1rih11 d1fskc1 d1boga1 d2a7711 d1osp11  
d1qfoa\_ d3dwta\_ d2fx711 d1rz711 d3stba1 d1pkqa1 d1b6da1 d1dzba2  
d1dzba1 d1kj2a\_ d4l1ha\_ d1rzgb1 d1dq1h\_ d12e811 d1miel1 d1jmaa\_  
d1sbs11 d1fgnh1 d1f5811 d1mqkh\_ d1ndgb1 d3qegl1 d1iail1 d2aw2a1  
d1tqbc1 d3fo2a1 d4dkaa\_ d1f8th1 d2g6011 d2ywy\_ d1uj3a1 d1yc7a\_  
d3bd3a\_ d4w6xb1 d1nmb1\_ d1i8ka\_ d1rjlb1 d1ypze1 d1p7kb1 d1kxqe\_  
d1gpoh1 d2z4qa1 d1w72h1 d1i9r11 d4qgya1 d4xt1c\_ d2qqnh1 d1cica1  
d3c08h1 d2cd0a\_ d2bdnh1 d1hnga1 d1mam11 d1nldh1 d1cr9h1 d4lcih1  
d3bkyh1 d3qg711 d1ai111 d1kxvc\_ d4iosd\_ d1l7ih1 d2x1qa\_ d1ub6b1

d3k74b\_ d1libgh1 d1teth1 d1ligya1 d1hxma1 d2x6ma\_ d2e71a\_ d5e03a\_  
d1qfwm\_ d2r0kh1 d1ligjb1 d1rurh1 d1plgh1 d1mj8h1 d1yuhb1 d3fmg11  
d1rzzf11 d1emtl1 d1ad9b1 d1igtb1 d1nlb11 d1d5ih1 d3k7ua\_ d4ffyh\_  
d1bwva\_ d3dvga1 d1a6ta1 d1fgvl\_ d4qxgl1 d1mim11 d1jhl1\_ d2hffb1  
d2hh011 d1qkzh1 d117t11 d1afvh1 d1iaii1 d2cjuh\_ d1lum5h1 d2ghwb2  
d2ghwb1 d1kgce1 d2fgwh1 d1likfh1 d1dvfd\_ d2i24n1 d2xtjb\_ d1za3b1  
d2yc1a\_ d2hh0h1 d2x1oa\_ d1bvka\_ d1rjla1 d5e7ba1 d1igta1 d1il1b1  
d2fb411 d1mvua\_ d1jpt11 d32c2a1 d1fvca\_ d1iqdb1 d2hrph1 d2p4ab\_  
d4qola\_ d1p2cb1 d1wt5c\_ d1t4ka1 d5c1mb\_ d1it911 d1bz7a1 d1b2wh1  
d1e4w11 d1jnl11 d1yedb1 d1za6b1 d3u7aa\_ d1igfh1 d3gnml1 d1orsa1  
d1wejl1 d1a2ya\_ d1hxmb1 d1gafh1 d2j4wh1 d1pz5a1 d1j05a\_ d1a3rh1  
d4fq111 d1qfwh\_ d1eo8h1 d1n7mh1 d4s11a\_ d1kegh1 d5da4a\_ d1iqw11  
d3whxb1 d1vgeh1 d1deeb1 d1c12b1 d1t2ql1 d1ad9a1 d3gsnb1 d3b2uc1  
d1ggbh1 d1t3fb1 d1nak11 d4ocmc\_ d1lila1 d2v7hb3 d2esve1 d1mcoh1  
d2qr0b1 d2q3aa\_ d1ct8a1 d1kcr11 d2pxyb\_ d2uzih\_ d5c3ld\_ d3durb\_  
d1c5c11 d2ak4e1 d1d17h\_ d1xiwd\_ d1mlba1 d1rmfl1 d1i7zb1 d1dlfl\_  
d2xa3a\_ d5bq7b1 d1dqqb1 d3h4211 d1legjh1 d1kcv11 d1fe811 d2j6e11  
d1f3rb2 d11k311 d1sm3h1 d1q0xh1 d1ghfh1 d7fab11 d1igch1 d1lo0h1  
d4idla\_ d5c2b1\_ d1jrh11 d1il1a1 d3zhda1 d4kfzc\_ d1b0wa\_ d1e6oh1  
d1mex11 d4krpb\_ d1fnsh1 d1ncwh1 d4hgma\_ d4eigb1 d4rzca\_ d2mpa11  
d4y5xa\_ d5en2b1 d3lrga1 d4ej1c1 d1rha1 d1j05b\_ d1forh1 d1q9wb1  
d2wzpd\_ d2aq2a1 d1h0da1 d3revb1 d2ij0c1 d1tzha1 d4m7j11 d1k6q11  
d3b9kc1 d1igml\_ d3qeua1 d1dsfl\_ d1ce1h1 d1kcu11 d1zvha1 d1zvoa1  
d1tqbb1 d1ay111 d2qsc11 d2cgrh1 d1n10h1 d1ken11 d3eo0a1 d4n9ob1  
d1n0x11 d3k1kc\_ d2cqva1 d1fhga\_ d2k1ma\_ d2d12a1 d1biha3 d1biha1  
d1biha4 d3qp3a1 d1g1ca\_ d1gxea\_ d1cvsc2 d1cvsc1 d1xmwa2 d1m4ka2  
d2otpa2 d1biha2 d1rhfa2 d2fcba2 d2fcba1 d1wwbx\_ d1gsm2 d1lepfa1  
d1lepfa2 d2dava1 d1waaa\_ d1f97a2 d1x44a1 d1vcaa2 d1fnla2 d1fnla1  
d3b5ha2 d3h8na2 d3h8na1 d1jbj1 d1jbj2 d1pd6a\_ d1f2qa2 d1f2qa1  
d3cx2a\_ d1nbqa2 d3b5ha1 d1n26a1 d1xiwb\_ d1xaua\_ d1fltx\_ d2ifga1  
d1olla1 d1olla2 d1cs6a4 d1cs6a3 d1cs6a2 d1cs6a1 d2gw5a2 d1sy6a1  
d1xiwa\_ d1lucta2 d1lucta1 d1ry7b2 d1gl4b\_ d1qz1a3 d1olza1 d2c9aa1  
d1wwca\_ d2aq2b1 d1ck1a1 d1lenfa1 d1i4pa1 d1v1oa1 d1et9a1 d1lesfa1  
d2g9hd1 d4ohja1 d1klud1 d1bxta1 d1eu3a1 d1ty0a1 d1fnua1 d1c4qa\_  
d1prtcl d2wv6d\_ d1prtfl\_ d1ltrd\_ d4l63b1 d1prtd\_ d1tl0f\_ d2bosa\_  
d1prtbl d3chbd\_

**Family-10 (a.26.1.2)**

**Positive dataset contains 10 protein sequences.**

d3tgxb\_ d2z3qa1 d3qb1a\_ d4nkqb\_ d5e4ea\_ d2o27a\_ d3b5ka\_ d2psma1  
d4zf7a\_ d3uf5a\_

**Negative dataset contains 4076 protein sequences.**

d1m32a\_ d1libja\_ d1c7na\_ d1iuga\_ d4q75a\_ d2bkwa1 d1t3ia\_ d1n8pa\_  
d1qz9a\_ d1jff9a\_ d1leg5a\_ d1p3wa\_ d3kgwa\_ d1cl1a\_ d2ctza1 d1vjoa\_  
d2rfva\_ d1gc0a\_ d1cs1a\_ d1d2fa\_ d2ch1a1 d1qgna\_ d1pffa\_ d1elua\_



d1ax4a\_ d2v1pa1 d2ez1a\_ d1u08a\_ d1lc5a\_ d1b5pa\_ d2ay1a\_ d3pd6a\_  
d7aata\_ d2csta\_ d1j32a\_ d1fg7a\_ d4wlha\_ d1o4sa\_ d1v2da\_ d1gdea\_  
d1m6sa\_ d1v72a1 d1svva\_ d1ajsa\_ d1wsta1 d2f8ja2 d11k9a\_ d1vp4a1  
d1xi9a1 d2gb3a1 d1yaaa\_ d1xkla\_ d2wfla\_ d3i2ka1 d11nsa3 d1mpxa2  
d1xkta1 d2hfka\_ d1jmkc\_ d5d3ka\_ d2cfba1 d1dfoa\_ d1o69a\_ d1bj4a\_  
d3k28a\_ d2bwpa\_ d3lg0a\_ d2fnua\_ d3ou5a\_ d1z7da1 d1b9ha\_ d1iaya\_  
d4msoa\_ d1bs0a\_ d1s0aa\_ d1sffa\_ d3tqxa\_ d1mdoa\_ d3qboa\_ d3pgya\_  
d1bjna\_ d2dkja\_ d1ejia\_ d1vefa1 d4wxga\_ d3bs8a\_ d3gbxa1 d1w23a\_  
d4nmwa\_ d1r0ka3 d1vkoa2 d1vm6a2 d3qvsa2 d1gr0a2 d1p1ja2 d3lgia\_  
d3i77a\_ d2z9ia2 d4nsva\_ d1lcya2 d4jcna\_ d1agja\_ d1os8a\_ d1hpga\_  
d1p3ca\_ d1l1ja\_ d1ddla\_ d1e57b\_ d1auyb\_ d1qnia1 d1fwxa1 d1f56a\_  
d1bypa\_ d1azca\_ d1ws8a\_ d3u25a\_ d1cuoa\_ d1id2a\_ d1rkra\_ d2iaac\_  
d4dp1x\_ d1nwpa\_ d2gima\_ d2i7sa\_ d1qhqa\_ d1gyca3 d1hfua2 d1kbva1  
d1kbva2 d1sdda1 d1sdda2 d1gyca1 d1gyca2 d1mzya1 d2bw4a1 d1aoza1  
d1aoza3 d1aoza2 d1kyaa2 d1kyaa3 d1kyaa1 d1mzya2 d4e9sa1 d1sddb1  
d1sddb2 d1hfua1 d1hfua3 d1oe1a2 d1oe1a1 d1v10a2 d1v10a3 d1v10a1  
d2dara2 d2dara1 d1wyha2 d2dloa2 d1rutx4 d1rutx3 d2cuqa2 d1x4la2  
d1x4la1 d1x3ha2 d1x3ha1 d2d8za1 d1x61a2 d1x6aa1 d1x6aa2 d2cora2  
d2cora1 d1v6ga1 d1v6ga2 d2d8za2 d1x64a1 d1x64a2 d1b8ta1 d2co8a1  
d1x63a2 d2dj7a2 d2dj7a1 d2cu8a2 d2cu8a1 d1g47a2 d1g47a1 d1j2oa1  
d1wyha1 d2dloa1 d1wiga1 d1wiga2 d2cupa2 d2cupa3 d1x68a1 d2d8ya2  
d2d8ya1 d1m3va2 d1x62a1 d1x68a2 d1x61a1 d1b8ta3 d1b8ta2 d2d8xa2  
d2d8xa1 d1x4ka1 d1x4ka2 d2cuqa1 d1m3va1 d2co8a2 d1j2oa2 d1x63a1  
d2cura1 d2cura2 d1x62a2 d1ny721 d1ny722 d1a6ca3 d1a6ca2 d1a6ca1  
d1pgl22 d1pgl21 d1pgl11 d1ny711 d3sxwa1 d4luka\_ d4qgna\_ d1vr3a1  
d2bema\_ d1pama1 d1ea9c1 d1qhoa1 d2fhfa2 d2fhfa1 d1k3ia1 d1j0ha1  
d1cxl1a1 d2bhua1 d1edqa1 d1f1sa2 d1ut9a2 d1gvia1 d1txka1 d2phla2  
d1fxza2 d1fxza1 d1lrha\_ d1uija1 g1dgw.1 d2v09a\_ d1uika2 d1uika1  
d1dgwa\_ d2pa7a1 d1wlta1 d1nxma\_ d2c0za1 d1ktja\_ d1ds6b\_ d1fstb\_  
d1g0da1 d3us3a3 d3us3a1 d1yloa2 d1y7ea2 d1y0ya3 d1lfwa1 d1vixa1  
d1fnoa4 d1vhoa2 d1ysja1 d1vhea2 d1z21a1 d2fvga2 d1vgya1 d1r3na1  
d2grea2 d1xmba1 g1q71.1 d1rtqa\_ d1h4ba\_ d2opoa\_ d1au7a2 d1lic8a2  
d3gpdg2 d2q49a2 d1hdgo2 d2g17a2 d2cvoa2 d2czca1 d3pwka2 d1obfo2  
d1i32a2 d1zyao2 d2pkqo2 d1b7go2 d2hjsa2 d1cf2o2 d1vkna2 d1nvmb2  
d1ux8a\_ d1dlya\_ d4i0va\_ d2bkma\_ d1dlwa\_ d2bmma\_ d2msya\_ d2djoa1  
d2r5za\_ d1au7a1 d1f43a\_ d2lmda1 d1akhb\_ d1s7ea1 d3nara\_ d1zq3p1  
d2craa1 d1mija\_ d4uuta\_ d3a01a\_ d1x58a1 d3rkqa1 d3cmya1 d2cqxa1  
d2da6a1 d1e3oc1 d1fjla\_ d1mh3a1 d1lig7a\_ d1x41a1 d1wh7a1 d1gt0c1  
d2mw8a\_ d1lfup\_ d1x2ma1 d1b72a\_ d1wi3a1 d1wjha1 d1x2na1 d1mnmc\_  
d2cuea1 d3k2aa\_ d2hosa\_ d2jwta2 d1pufa\_ d1oactc1 d2hi3a\_ d1b8ia\_  
d4j19a\_ d3lnqa\_ d1wh5a1 d1b8ib\_ d1hlva1 d1iufa2 d1iufa1 d2iu5a1  
d1zk8a1 d2g7sa1 d2fd5a1 d2np5a1 d1z0xa1 d2id6a1 d2d6ya1 d2i10a1  
d1vi0a1 d2oi8a1 d3c07a1 d2ns7a1 d2fq4a1 d2yvea1 d1t33a1 d2o7ta1  
d2np3b1 d2g7ga1 d2gena1 d2fbqa1 d2g71a1 d2gfna1 d2g3ba1 d2jj7a1

d2hyja1 d1sgma1 d1ui5a1 d2hkua1 d2id3a1 d4jyka1 d1bl0a1 d1bl0a2  
d1d5ya1 d3ubub\_ d1legia\_ d1qo3c\_ d1v7pa\_ d1tdqb\_ d3ubua\_ d1c3ab\_  
d1h8ua\_ d3bx4b\_ d1t8ca1 d1sb2a1 d1qdda\_ d2ziba1 d3cada\_ d1byfa\_  
d1j34b\_ d1jwia\_ d1jzna\_ d1c3aa\_ d1loz7b\_ d1wmza\_ d3bdwb\_ d1hq8a\_  
d1fifa1 d1dv8a\_ d3hupa\_ d1wk1a1 d1umra\_ d2afpa\_ d3bx4a\_ d1gz2a\_  
d1sl6a\_ d1v7pb\_ d3g8ka\_ d1ixxa\_ d1j34a\_ d1jwib\_ d1g1sa1 d1y17a1  
d1ja3a\_ d1fvub\_ d3bdwa\_ d1sb2b1 d1fvua\_ d1umrc\_ d1loz7a\_ d4m17a\_  
d3cfwa1 d1ypqa1 d1g1ta1 d3fd4a\_ d3l9jc\_ d4dn8a1 d1v4lb\_ d1rdl1\_  
d2msba\_ d3lv8a\_ d1s3ga1 d1zakal d1s4qa\_ d3tvta2 d1uf9a\_ d1khta\_  
d1ckea\_ d1osna\_ d1p5zb\_ d4tmka\_ d3cm0a\_ d1tmka\_ d1jaga\_ d3h86a\_  
d1t0hb\_ d1nn5a\_ d2h92a\_ d3kb2a1 d2c95a1 d1yj5a2 d1kgda\_ d1ly1a\_  
d2ak3a1 d1vyva2 d1deka\_ d2grja1 d1p3ja1 d1y63a\_ d1e4ya1 d1s96a\_  
d3iija1 d1lvga\_ d1nksa\_ d1vyua2 d4e22a\_ d1qf9a\_ d1jjva\_ d1q3ta\_  
d1ki9a\_ d1lw7a2 d1teva\_ d1kjwa2 d1gsia\_ d1g3ma\_ d1j99a\_ d1t8ta1  
d1nsta\_ d1zrha\_ d1ls6a\_ d2a3ra\_ d1aqua\_ d2zptx\_ d3ckla\_ d1texa\_  
d1q44a\_ d2gwaha\_ d1z0ja1 d3umra2 d3gj0a1 d2gaoa1 d1yzga1 d1x3sa1  
d1g7sa4 d1puja\_ d1udxa2 d1kk1a3 d2o52a\_ d1jwyb\_ d1zcaa2 d1zcba2  
d2fv8a1 d2cjwa\_ d3dz8a1 d1xzpa2 d1vg8a\_ d4qxaa\_ d2ew1a1 d1x1ra1  
d2bcgy\_ d3doea1 d3cona\_ d3rega\_ d3wyga\_ d1upta\_ d2b6ha1 d1zd9a1  
d1lnza2 d1r5ba3 d1n0ua2 d1r2qa\_ d2f91a1 d2rhda\_ d3q3jb\_ d3q85a\_  
d1efma1 d1r8qa\_ d2gf9a1 d2akab1 d1ek0a\_ d1z08a1 d2gcoa1 d2dy1a2  
d4g01b\_ d2cxa1 d1svia\_ d3q72a\_ d1ni3a1 d4ac9a4 d2erxa1 d2bmea\_  
d1wxqa1 d2gf0a1 d4ldja1 d1zunb3 d1d5ca\_ d4lv5b\_ d1efca3 d1kmqa\_  
d2g6ba1 d3lrpa\_ d1tada2 d2y8ea\_ d4rd4a1 d1z06a1 d2heia\_ d3a58b\_  
d1u01a2 d1d2ea3 d1zj6a1 d2ocba\_ d3rwoa\_ d1mr3f\_ d2e9sa1 d4u5xa1  
d2iwra\_ d2fn4a1 d3bwdd\_ d2nzja1 d2atva1 d2ksqa\_ d3l43a\_ d1mkya2  
d1mkya1 d1wmsa\_ d1jnaya3 d2rmka\_ d1f6ba\_ d1f60a3 d1gota2 d1jala1  
d2fh5b1 d1g16a\_ d2wblc\_ d1m7ba\_ d1wf3a1 d1f5na2 d1t9ha2 d1z6xa1  
d1z0aa1 d2fg5a1 d2a5ja1 d2bcjq2 d1s0ua3 d1ky3a\_ d4y0va\_ d4lhwa\_  
d2qmea1 d2atxa1 d1egaa1 d1ryha\_ d1moza\_ d1nrjb\_ d2erya1 d3bfka\_  
d1puia\_ d1fzqa\_ d3j3az1 d3t5ga\_ d1shza2 d3defa\_ d2f7sa1 d3raba\_  
d3tsoa\_ d3aq4a\_ d2a17a1 d3sfva1 d3bc1a\_ d2ncda\_ d1sdma\_ d3h4sa1  
d2heha\_ d2grya\_ g3kin.1 d1kk8a2 d1br2a2 d1goja\_ d1f9va\_ d2mysa2  
d1lkxa\_ d3t0qa\_ d4db1a1 d3gbja\_ d1ry6a\_ d1v8ka\_ d1vava\_ d1luaia\_  
d1k8ka2 d1k8ka1 d3uleb1 d3i33a2 d3i33a1 d1dkgd2 d1dkgd1 d4ci6a2  
d1jcfa1 d4a2ba2 d2fxua1 d1yaga2 d1yaga1 d4cbua2 d1bupa2 d1g99a2  
d2elza2 d2elza1 d1saza1 d1saza2 d1ig8a1 d1czan2 d1czan1 d1ig8a2  
d1czan4 d1bg3a4 d1bg3a3 d1bg3a2 d1bg3a1 d1nira1 d1qksa1 d1hroa\_  
d4gedb\_ d3zooa\_ d1mz4a\_ d1gu2a\_ d1f1fa\_ d1dvva\_ d1c6ra\_ d1c75a\_  
d1e29a\_ d1gdva\_ d1cnoa\_ d1h32b\_ d1co6a\_ d2bh4x\_ d2aiua\_ d5cytr\_  
d1jdl\_ d1i8oa\_ d2zboa\_ d3dmia\_ d1ls9a\_ d1wvec\_ d2yk3a\_ d3ph2b\_  
d1dw0a\_ d5aura\_ d1ql3a\_ d1qn2a\_ d1f1ca\_ d2nqya\_ d1h4ga\_ d1hixa\_  
d1oa2a\_ d1olra\_ d3b7ma\_ d4h7ma1 d3wp3a\_ d2vgda\_ d1ligoa\_ d3zsea\_  
d2nlra\_ d3wx5a\_ d1oa3a\_ d1pvxa\_ d1f5ja\_ d1oa4a\_ d1ks5a\_ d4ix1a1

d1h32a2 d1v8fa\_ d2ejca\_ d3muea1 d3q12a1 d3rbaa\_ d2qtra\_ d1nupa\_  
d3l92a\_ d1f9aa\_ d1qjca\_ d2h29a\_ d1vlha\_ d1lod6a\_ d1lw7a1 d1mrza2  
d4ruka\_ d2el7a\_ d1liq0a2 d1irxa2 d1r6ta2 d1ivsa4 d2cyba\_ d1rqga2  
d1j09a2 d2yxna\_ d1f7ua2 d1h3fa1 d1ffya3 d2g36a1 d1nzja\_ d1jila\_  
d1n3la\_ d1pfva2 d1h3na3 d3n9ia\_ d3sz3a1 d3sw2a\_ d1moxc\_ d1dx5i3  
d1edmb\_ d1autl2 d1autl1 d1dval1 d1szba2 d1kigl\_ d2y5fl\_ d1ijqa2  
d1gk5a\_ d1gl5a2 d1nt0a3 d1xdtr\_ d1lmja2 d1lmja1 d1nzia2 d2wphe\_  
d1klil\_ d1pfxl2 d1pfxl1 d1p9ja\_ d1g1ta2 d1f7ea\_ d4yzub\_ d2mgpa1  
d1b9wa1 d1b9wa2 d2mgpa2 d1oblcl d1oblcl2 d1n1ia2 d2npra2 d2npra1  
d1m1xb4 d2y5ia\_ d1qlsa\_ d1psra\_ d3n22a\_ d2egda\_ d4ggfc\_ d2wcea\_  
d2luca\_ d4aqia\_ d3nsia\_ d2lp3a\_ d1j55a\_ d1a4pa\_ d1k8ua\_ d1nsha\_  
d1pvaa\_ d3fs7a\_ d2pvba\_ d1ttxa\_ d1rwya\_ d2kyfa\_ d1rk9a\_ d1a75a\_  
d1lexra\_ d1tiza1 d1nyaa\_ d1ggwa\_ d1wdcc\_ d3fwba\_ d1ggza\_ d2o5ga\_  
d1ctaa\_ d1m45a\_ d3i5gc\_ d1sl8a\_ d1fpwa\_ d2scpa\_ d2roaa\_ d4aqra\_  
d3pn7b\_ d1br1b\_ d2mysb\_ d1s6ca\_ d1bjfa\_ d2obha\_ d1jfka\_ d1jf0a\_  
d1qv0a\_ d1lkja\_ d2mlfc\_ d2m97a\_ d2d8na\_ d4by5a\_ d1jbaa\_ d4nqga\_  
d1wdcb\_ d2mysc\_ d1j7qa\_ d1s6ia\_ d1uhka2 d1r2ua\_ d1dtla\_ d3kf9a\_  
d3pn7c\_ d1qjta\_ d1fi6a\_ d1c07a\_ d5d67d\_ d1tuza\_ d1h8ba\_ d1leg3a1  
d2zkmx1 d1snla\_ d1gjya\_ d1y1xa\_ d1hqva\_ d1dvia\_ d1df0a1 d1qxp2  
d4usla\_ d1wkya2 d1uuqa\_ d3wh9a\_ d4mlra\_ d1xyza\_ d4xuya\_ d2je8a5  
d4bf7a1 d3cuia\_ d1ur4a\_ d1qw9a2 d1lodza\_ d2vzsa5 d1bqca\_ d2x2ya1  
d1hjqa\_ d1qnra\_ d4y7ea1 d4k68a\_ d2v3ga\_ d4hpga\_ d1nofa2 d1nq6a\_  
d1h4pa\_ d1aq0a\_ d3ziza\_ d4bs0a\_ d1ecea\_ d1h1na\_ d1ta3b\_ d1w91a2  
d1ilwa\_ d1uhva2 d1us3a2 d1legza\_ d7a3ha\_ d1tvna1 d3nyda1 d1ghsa\_  
d2cyga1 d4xv0a\_ d2c8na2 d1w32a\_ d3emca\_ d1v6ya1 d1foba\_ d2uwfa1  
d2fgla\_ d3niya1 d2c0ha1 d1rh9a1 d1yq2a5 d1szna2 d1fa2a\_ d1pama4  
d5do8a1 d1ea9c3 d1hx0a2 d2fhfa5 d1qhoa4 d1avaa2 d1m53a2 d4m8ua1  
d2gjpa2 d1lwha2 d4howa1 d1ktba2 d1j0ha3 d3vm5a1 d2x1ia\_ d1wzaa2  
d1uasa2 d2diea1 d1mxga2 d1ht6a2 d1eswa\_ d1iv8a2 d5cpsa\_ d1ud2a2  
d1zjaa1 d3gbea1 d1kwga2 d1wdpa\_ d1gcya2 d1g5aa2 d1hvxa2 d3dhpa2  
d2bhua3 d4do4a1 d3qgva1 d1e43a2 d1g94a2 d2d3na2 d1gjwa2 d1gvia3  
d1x1na1 d1r7aa2 d1tz7a1 d4toqa\_ d1wb0a1 d1w9pa1 d1eoka\_ d1litxa1  
d1kfwal d1goia2 d1ledqa2 d2gsja\_ d1hjxa1 d1jnda1 d1vf8a1 d3wdpp1  
d3wq5a\_ d1gnxa\_ d4gxpa\_ d4hz8a\_ d1e4mm\_ d3aiua\_ d1wcga1 d1qvba\_  
d3ahxa\_ d1v02a\_ d2dgaa\_ d1pbga\_ d1vffa1 d1qoxa\_ d4ha4a\_ d1mixa2  
d1j19a2 d1isna2 d2a16b2 d3syxa1 d1mkea1 d2p8va\_ d1xoda1 d1i7aa\_  
d1evha\_ d1legxa\_ d1b9ra\_ d1offa\_ d1frra\_ d3wcqa\_ d1e9ma\_ d1l5pa\_  
d1wria\_ d1i7ha\_ d3av8a\_ d1rfka\_ d3p1ma1 d3b2ga\_ d2bt6a2 d1wgqa1  
d1v89a1 d2coda1 d1zc3b\_ d1wg7a1 d1u5ea1 d1v61a1 d2coca1 d2ys1a1  
d1v5pa1 d1ntya2 d1wjma1 d1wi1a1 d1u29a\_ d1xx0a1 d1unqa\_ d2zkmx3  
d1fhoa\_ d1v88a1 d2adza1 d1x1fa1 d1p6sa\_ d2coaa1 d1btka\_ d1v5ma1  
d1faoa\_ d2x18a\_ d1dyna\_ d1x1ga1 d4kaxb\_ d2j59m1 d1xcga2 d1txda2  
d1u5da1 d1dbha2 d1w1ha\_ d1upqa\_ d1v5ua1 d1foea2 d2fjla1 d1eaza\_  
d2dfka2 d2cofa1 d1kz7a2 d1h6ta1 d1h6ua1 d9ldta1 d2ewda3 d1up7a1

d2dfda1 d1s6ya1 d1vjta1 d7mdha1 d1hyea1 d1t2da1 d1ojsa3 d1b8pa1  
d1ldna1 d1hyha1 d1civa1 d2a92a1 d1ez4a1 d1i0za1 d1y6ja1 d1gv0a1  
d1ur5a1 d1lllda1 d1obba1 d1v8ba1 d1gdha1 d2dlda1 d1mx3a1 d1ygya1  
d1qp8a1 d1lli4a1 d1j4aa1 d2naca1 d1npya1 d3t4ea2 d1a4ia1 d1o0sa1  
d2hk9a2 d2egga2 d1b26a1 d1bvua1 d1gq2a1 d1c1da1 d1leha1 d1gtma1  
d1euzal d1nvta1 d3dona2 d1edza1 d1gpja2 d1p77a1 d1nyta1 d1b0aa1  
d1vl6a1 d1v9la1 d1txga2 d3f47a1 d2pv7a2 d1xc2a3 d2ahra2 d4xiya1  
d2f1ka2 d1pgja2 d1i36a2 d1np3a2 d1lj8a4 d1teaa3 d1qmga2 d2i76a2  
d2g5ca2 d1wdka3 d1dlja2 d3cuma3 d1kola2 d1f8fa2 d1qora2 d1jqba2  
d1vj0a2 d1cdoa2 d1gu7a2 d1d1ta2 d1xa0a2 d2dm6a2 d1jvba2 d1rjwa2  
d1llua2 d1h2ba2 d1tt7a2 d1piwa2 d1o89a2 d1iz0a2 d1e3ja2 d1yb5a2  
d1uufa2 d1vj1a2 d1e3ia2 d3gpdg1 d2nvwa1 d1u8fo1 d1ydwa1 d1hdgo1  
d2g17a1 d1cf2o1 d2czca2 d1r0ka2 d1lobfo1 d2cvoa1 d1ebfa1 d1h6da1  
d1i32a1 d1zh8a1 d2q49a1 d1qkia1 d1j5pa4 d3pzra1 d1xeaa1 d1vkoa1  
d1vm6a3 d3qvsa1 d2pkqo1 d1b7go1 d1gr0a1 d1p1ja1 d1lc0a1 d1j0xo1  
d3pwka1 d2hjsa1 d1zyao1 d1vkna1 d1t1ta1 d1nvm1 d3sjua\_ d3ojfa1  
d1xu9a1 d2jjya1 d1n7ha\_ d1y1pa1 d1h5qa\_ d1jtva\_ d4fs3a\_ d2bkaa1  
d1gy8a\_ d2c5aa1 d1ulsa\_ d1ooea\_ d2b69a1 d1y5ma1 d1spxa\_ d1aela\_  
d1bxka\_ d1ydea1 d1gega\_ d1hdoa\_ d1o5ia\_ d1e6ua\_ d1snya1 d2rhca\_  
d3zv4a\_ d5ceja\_ d2d1ya1 d1fjha\_ d3w8ea\_ d2fmua1 d1x1ta\_ d1rpna\_  
d3ay7a1 d1k2wa\_ d1eq2a\_ d2hrba1 d3ruaa\_ d2ew8a1 d4hwka\_ d1xgka\_  
d2bd0a1 d1yo6a1 d2a35a1 d2ntva\_ d1vl8a\_ d1hdca\_ d4bkua\_ d2ag5a1  
d2q45a\_ d1nffa\_ d4iy1a\_ d1zbqa1 d1kewa\_ d1ek6a\_ d1ja9a\_ d2q46a2  
d1iy8a\_ d1cyda\_ d2ptga\_ d1hxha\_ d1uzma1 d3lyla\_ d4m89a\_ d3wyea\_  
d2b1la1 d1w6ua\_ d1sb8a\_ d2q2va\_ d4nr0a\_ d1e6wa\_ d2gasa\_ d3oiga1  
d2bgka1 d1mxha\_ d1vl0a1 d1rkxa\_ d1r6da\_ d1wmaa1 d1e7wa\_ d2c07a1  
d1xkqa\_ d3tzha\_ d1g0oa\_ d3lz6a\_ d1qyca\_ d1ledoa\_ d1gz6a\_ d1loc2a\_  
d1t2aa\_ d1zema1 d2xoxa\_ d1z45a2 d1geea\_ d1p33a\_ d3lt0a\_ d4e6pa\_  
d2wyua\_ d1db3a\_ d4q9na\_ d1xhla\_ d4o1ma\_ d1fmca\_ d2uvda\_ d2gdza1  
d1uaya\_ d2z1ma\_ d2o23a2 d2fr1a2 d2fr1a1 d1qsga\_ d1qyda\_ d4zjua\_  
d2a4ka1 d1yb1a\_ d1wvga1 d1yxma1 d3f4ba\_ d1mg5a\_ d1xg5a1 d1r55a1  
d3gboa\_ d1atla\_ d1kufa\_ d1buda\_ d4q1la\_ d1yp1a\_ d1wnia\_ d1xd3a\_  
d3ifwa\_ d3u1ra1 d1g9ka2 d1kapp2 d2w0pa\_ d2diaa1 d2e9ia2 d2e9ja1  
d2dj4a1 d2eeba1 d2diba1 d2dmba1 d2dmca1 d2d7oa1 d2ee6a1 d2d7pa1  
d2eeaa1 d2di8a1 d1wlha1 d2d7na1 d2nqca\_ d2d7ma1 d2dica1 d3cnka\_  
d2k3ta1 d2eeca1 d1qfha2 d2bp3a1 d1v05a\_ d2ee9a1 d2eeda1 d2di9a1  
d3ioqa\_ d1fh0a\_ d1o0ea\_ d1khqa\_ d1m6da\_ d2cb5a\_ g8pch.1 d1s4va\_  
d2pnsa\_ d1vsna1 d1mira\_ d1liwda\_ d2oula\_ d7pcka\_ d3bwka\_ d3bcna\_  
d2p86a\_ d1pvja\_ d1pcia\_ d1gece\_ d1deua\_ d4bs6a\_ d1xkga1 d1cqda\_  
d1jqpa2 d2c0ya\_ d2bdza\_ d3p5ua\_ d2o36a\_ d1k9xa\_ d1zoya1 d1qo8a2  
d1d4ca2 d1chua2 d1jnra2 d2jk6a2 d2jk6a1 d1feca1 d1feca2 d1lpfa1  
d1lpfa2 d1xhca1 d1xhca2 d1dx1a2 d1dx1a1 d1gera2 d1m6ia2 d1onfa1  
d1onfa2 d3lada2 d3lada1 d1w4xa1 d1w4xa2 d1gesa2 d1mo9a1 d1xdia1  
d1fl2a2 d1fl2a1 d1fcda1 d1fcda2 d1h6va2 d1h6va1 d1mo9a2 d1gv4a2

d1gv4a1 d2gv8a2 d2gv8a1 d1aoga1 d1aoga2 d1hyua1 d1ebda1 d1ebda2  
d3dk9a1 d1qlra2 d1qlra1 d1gesa1 d1w5qa\_ d2c1ha\_ d1ohla\_ d1l6sa\_  
d1zbfal d2z1ha\_ d2etja1 d3qioa1 d1j11a\_ d2e4la\_ d1j12a\_ d21sna1  
d1lio2a\_ d1uaxa\_ d2yv0x\_ d1mu2a1 d1lekea\_ d1i39a\_ d1ps9a2 d1o94a2  
d1lqta1 d1pn0a1 d1reoa1 d1ju2a1 d2f5va1 d3c96a1 d2gmha1 d1pj5a2  
d1gpea1 d1o5wa1 d1n4wa1 d1k0ia1 d2dw4a2 d2ivda1 d2voua1 d1kdga1  
d1s5ja1 d2hbja2 d2igia\_ d1wlja\_ d1qhta1 d4dlea1 d2f96a1 d3tr8a1  
d3mxma\_ d1q8ia1 d1y97a1 d1w0ha\_ d1kfsa1 d2py5a1 d1noya\_ d1d5aa1  
d1yt3a3 d2guia\_ d3mwpal d4kb1a\_ d2v76a\_ d1wj1a1 d1aqca\_ d1qqga2  
d1qqga1 d1ntva\_ d1n3ha\_ d4dbba\_ d3f0wa1 d1p3ra\_ d1wgua1 d2cy4a1  
d3hqca\_ d1wvha1 d1xr0b1 d1v58a1 d1t3ba1 d4ilfa2 d4npba2 d1tq5a1  
d1jmx2 d1jmx1 d1pbya1 d1r7ha\_ d1faaa\_ d1wika1 d1xfla\_ d1ttza1  
d2f51a1 d1ti3a\_ d1nhoa\_ d1sena\_ d2i4aa\_ d1ep7a\_ d1zmaa1 d1fo5a\_  
d3lefa1 d3diea1 d2yana1 d1z6na1 d1oaza\_ d3zywa1 d4aj8a\_ d4fiwa\_  
d1wmja\_ d4hs1a1 d1iloa\_ d1xwaa1 d1wjka1 d2vm1a\_ d1fb6a\_ d1gh2a\_  
d1h75a\_ d1nw2a\_ d1kx5b\_ d3a6na\_ d4m6ba2 d2nqbd\_ d3wkjd\_ d2yfwe\_  
d4h9na\_ d5bnxa\_ d1kx5c\_ d3r45a\_ d1eqzb\_ d4jjnb\_ d1f66c\_ d1eqza\_  
d4wnnb\_ d1kx5a\_ d1u35c1 d1id3a\_ d2nqbc\_ d1kx5d\_ d1ku5a\_ d1f1ea\_  
d2b5ea2 d2b5ea3 d2b5ea1 d2b5ea4 d2kp1a1 d2kp2a1 d1hyua3 d1hyua4  
d1j08a1 d1j08a2 d1pd212 d1nhya2 d2a2ra2 d1k0dd2 d1f2ea2 d1gsua2  
d1f3ba2 d2fhea2 d2pvqa1 d1tw9a2 d1loyja2 d1e6ba2 d1k0ma2 d3ik7a1  
d4is0a1 d1r5aa2 d1j1va2 d1m0ua2 d3gtub2 d1z9ha2 d1okta2 d1axda2  
d2gsra2 d1tu7a2 d1k3ya2 d1zgma1 d1b48a2 d1gnwa2 d1gwca2 d2gsta2  
d1glqa2 d1oe8a2 d1pn9a2 d1v2aa2 d1fw1a2 d1duga2 d1qqya\_ d1gd6a\_  
d1livma\_ d2gv0a\_ d1iiza\_ d2z2fa\_ d1j8xa\_ d1ghla\_ d1b9oa\_ d1741a\_  
d1691a\_ d2o4wa\_ d1p37a\_ d1k28a3 d1xjta1 d1jtma\_ d2f2qa\_ d4e97a1  
d3w3ea\_ d4tx7a\_ d3cq1a\_ d4msta\_ d3iwra\_ d1dxja\_ d2z37a\_ d4dyga\_  
d1mpya2 d1kw3b2 d1kw3b1 d4ghga1 d1tfza1 d3isqa1 d3isqa2 d1sqia1  
d1sqia2 d1lkda2 d1lkda1 d1mpya1 d1cjxa2 d1cjxa1 d1sp9b2 d1t47a1  
d1t47a2 d1f1ua2 d1sp8a1 d1sp8a2 d1f1ua1 d1s5ja2 d1qhta2 d4dlea2  
d1tgoa2 d3py8a2 d1q8ia2 d1kfsa2 d2py5a2 d1qsta\_ d2beia1 d4m3sa\_  
d1u6ma1 d1ygha\_ d1yk3a1 d3dr6a\_ d1xmta\_ d1z4ea1 d2ge3a1 d1bo4a\_  
d2fiaa1 d2jdca1 d1y9wa1 d3to7a\_ d1wwza1 d2fl4a1 d2ozua1 d2b5ga\_  
d2cy2a1 d2p0wa\_ d1cm0a\_ d4pswa\_ d1yrea1 d1yr0a1 d1m4ia\_ d2gana1  
d1yvka1 d1ghea\_ d2g3aa1 d1y7ra1 d2eulia1 d1q2ya\_ d2fsra1 d1xeba\_  
d2ae6a1 d1cjwa\_ d1qsma\_ d2aj6a1 d1y9ka1 d1i12a\_ d1vkca\_ d2atra1  
d1n71a\_ d2d4pa1 d2fiwa1 d2fe7a1 d1tiqa1 d2ou2a\_ d1yx0a1 d2fcka1  
d2j8ma\_ d2pq8a\_ d1z4ra1 d1s3za1 d1ufha\_ d1c4qa\_ d1prtc1 d2wv6d\_  
d1prtf\_ d1l1trd\_ d4l63b1 d1r4pb\_ d1prtd\_ d1tl0f\_ d2bosa\_ d1prtb1  
d3chbd\_ d1xvqa1 d1pn0a2 d3hy2a\_ d2cvba1 d1o8xa\_ d1lu4a\_ d1we0a1  
d2bmxa1 d2a4va1 d1psqa\_ d1xiya1 d1q98a\_ d1n8ja\_ d1zofa1 d2ggta\_  
d3tjja\_ d4je1a1 d1o73a\_ d3s9fa\_ d2zcta\_ d1qmva\_ d1jfua\_ d2b1ka\_  
d5dvba1 d2b5xa1 d2v2ga\_ d1st9a\_ d3tb2a\_ d4llra\_ d4fh8a1 d1e2ya\_  
d1knga\_ d2h30a\_ d1i5ga\_ d2z9sa\_ d2f8aa1 d1tp9a1 d2b7ka\_ d1nm3a2

d3hvva\_ d2wfca1 d4kcea\_ d1xvwa1 d4gqca1 d3qpma\_ d4k1fa\_ d1zzoa1  
d1gp1a\_ d2m5ta\_ d1cqqa\_ d1wqsa\_ d5bpea\_ d2ipha\_ d1lvoa\_ d2bhga1  
d3tnta\_ d3sjia\_ d3d23a1 d2fyqa\_ d3tloa\_ d3zvea1 d2hrva\_ d3q3ya1  
d4asha1 d4aw8a\_ d1jgta2 d1ofda3 d1ea0a3 d1ecfa2 d1q15a2 d1ct9a2  
d1te5a\_ d1ys1x\_ d4hs9a\_ d1ispa\_ d1ex9a\_ d3qmma\_ d1ra6a\_ d1muka\_  
d3gsza\_ d1khva\_ d1te9a\_ d2xwha\_ d3uqsa\_ d3hkwa\_ d3n6ma\_ d2cjqa\_  
d2xyma\_ d1teba\_ d1te8a\_ d1s48a\_ d1u09a1 d4wfxa\_ d3tyqa\_ d2pgga1  
d3rp2a\_ glucy.1 d1fuja\_ d2zchp\_ d3w94a\_ d1si5h\_ d1lo6a\_ g2pka.1  
d1cgha\_ d1kigh\_ d1a5ia\_ d3s9ba\_ d1hj8a\_ d1ao5a\_ d2anya\_ d1q3xa1  
d1gvza\_ d1azza\_ d4gsoa\_ d2f91a1 d1iaua\_ d1gdna\_ d1eufa\_ glfiw.1  
d1eq9a\_ d4nfea\_ d2rdla\_ d1spja\_ d1elva1 d1a7sa\_ d1ekbb\_ d1pfxc\_  
d1yc0a\_ d2aiqa\_ glfiz.1 d1fi8a\_ d4k60a\_ d4dgja\_ d1mzaa\_ d1op0a\_  
d3tjva\_ d1pytd\_ d1sgfg\_ glgg6.1 d2eeka\_ glrtf.1 d1a0ja\_ d3g01a\_  
d1pytc\_ d4e7na\_ d1ddja\_ d1z8ga1 d2hlca\_ d1npma\_ d1brup\_ gljou.1  
d1sgfa\_ d1autc\_ g2hnt.1 g1kdq.1 d1orfa\_ d3s69a\_ d4crga\_ d1fxya\_  
d1bqya\_ d1lgya\_ d4l3wa\_ d1gz7a\_ d1lukca\_ d3ia2a\_ d1a88a\_ d4dgqa1  
d1hkha\_ d1zoia\_ d3zxha\_ d1cgl\_a\_ d1rm8a\_ d1leaka2 d1hy7a\_ d2jsda\_  
d1cxva\_ d1hv5a\_ d1i76a\_ d3p0ya1 d1igra1 d1igra2 d1n8yc2 d1n8yc1  
d1m6ba2 d1m6ba1 d1m41a\_ d2bk7a\_ d3fjua\_ d1z5ra1 d1kwma1 d1uwya2  
d1jqga1 d2c1ca1 d1dtda\_ d1h81a2 d2tbvc\_ d1c8nc\_ d1x36a\_ d1smvc\_  
d4sbvc\_ d1lopoa\_ d1f2nc\_ d1cixa\_ d1y29a\_ d1v7fa\_ d2jtba\_ d1d1ha\_  
d1g9pa\_ d1lupa\_ d1qk7a\_ d1mb6a\_ d2a2va\_ d1niya\_ d1i25a\_ d1hvwa\_  
d2mpqa\_ d1kqha\_ d1la4a\_ d2mxoa1 d1d10a\_ d1koza\_ d1qk6a\_ d1emxa\_  
d1lqra\_ d1c6wa\_ d1rmka\_ d1ixta\_ d1eyoa\_ d1cna\_ d1fu3a\_ d1glpa\_  
d1f3ka\_ d1fyga\_ d1rypd\_ d1irua\_ d1rypc\_ d3unfk\_ d1rypa\_ d1j2pa\_  
d1irui\_ d1j2qh\_ d3unfh\_ d1m4ya\_ d1rypb\_ d1irul\_ d1irug\_ d1iru2\_  
d1q5rh\_ d1rypg\_ d1g3ka\_ d1iruf\_ d1q5qa\_ d1e94a\_ d1irub\_ d1ryph\_  
d3ty6a\_ d1iruj\_ d1iruk\_ d1rype\_ d1irud\_ d1irue\_ d3mi01\_ d1rypf\_  
d2z3ba\_ d1iruc\_ d3mka2\_ d1irul\_ glgk9.1 glor0.1 gle3a.1 d1mqta\_  
d1d4m3\_ d1fmd3\_ d2mev1\_ glaym.1 d1ev13\_ d4q4w1\_ d1r1a3\_ d2x5ia\_  
d1rhi1\_ glr1a.1 gl4d4m.1 glrhi.1 d1b35b\_ d1loopa\_ d1tme1\_ d4iv1a\_  
glpvc.1 glfpn.1 d1fpn1\_ d4gb31\_ d1d4m1\_ d1fmd1\_ d1ev11\_ d2wzr3\_  
glcov.1 d1qqp3\_ glfmd.1 d2x5ic\_ d1rhi3\_ gloop.1 d1hxs1\_ glhxs.1  
d1fpn3\_ d1bev1\_ g2mev.1 d1eah3\_ d1aym1\_ d1pvc3\_ d1qqp1\_ d1zba3\_  
d1h8ta\_ d3vbhc\_ glb35.1 glbev.1 d1hxs3\_ glev1.1 d1bev3\_ gltmf.1  
d1tmf1\_ d2mev3\_ gleah.1 glh8t.1 d1eah1\_ d4q4w3\_ d1r1a1\_ d1aym3\_  
d1pvc1\_ d1zba1\_ d1h8tc\_ d1oopc\_ d1tme3\_ glqqp.1 d4iv1c\_ gltme.1  
d1p8ba\_ d4w9ta\_ d4x2ra1 d1ka9f\_ d1qo2a\_ d4axka1 d1thfd\_ d1h5ya\_  
d4u28a\_ d2y88a\_ d4wd0a\_ d1vzwa1 d1eixa\_ d3exra\_ d2ffca1 d2fdsa1  
d3n3ma1 d2czda\_ d1q6oa\_ d2yyua\_ d1vqta1 d1dbta\_ d3ldva1 d4lt9a1  
d3tc7a1 d3hoja\_ d1i4na\_ d3vnda\_ d3n18a1 d1geqa\_ d3nava1 d1v5xa\_  
d4a2ra1 d3tc6a1 d4ijba\_ d1xcfa\_ d1vc4a\_ d1rd5a\_ d1qopa\_ d3b5va\_  
d2r80b\_ d1cqxa1 d1cg5a\_ d1gcvb\_ d3boma\_ d2h8fb\_ d2raoa\_ d3bj1a\_  
d4hrrb\_ d2r50a\_ d3d1kb\_ d2aa1b1 d3zhwa\_ d3hf4b\_ d3gdja\_ d1jebb\_

d3bj1b\_ d1x9fb\_ d1wmub\_ d1gcva\_ d3bcqb\_ d3d4xb\_ d1gvha1 d2dc3a\_  
d3hf4a\_ d4yu3a\_ d3k8ba\_ d1qpwb\_ d2r80a\_ d3bcqa\_ d1v4wa\_ d3wtgb\_  
d1j17a\_ d4esaa\_ d1a9we\_ d3d1ab\_ d1fsla\_ d4h21a\_ d1v4wb\_ d1mwca\_  
d1vhba\_ d1jeba\_ d1spgb\_ d1h97a\_ d1q1fa\_ d1tu9a1 d3d1aa\_ d1hdsb\_  
d3hyub\_ d2zfbb\_ d3fs4a\_ d1oj6a\_ d1shrb\_ d4h21b\_ d4yu3b\_ d1spga\_  
d3hrwa\_ d3qgra\_ d3at5a\_ d4wchd\_ d3hyua\_ d1cg5b\_ d1uc3a\_ d1hbra\_  
d2raob\_ d1outb\_ d4esab\_ d3gdjb\_ d3qqqa\_ d1x9fc\_ d3vrfa\_ d1litha\_  
d3mkba\_ d3d4xa\_ d3mjpa\_ d1j16a\_ d3fh9a\_ d1outa\_ d2dc3b\_ d1it2a\_  
d3eoka\_ d3g46a\_ d1qpwa\_ d3vrfb\_ d1ch4a\_ d1x9fd\_ d1hdsa\_ d2zfba\_  
d3mkbb\_ d1or4a\_ d3wtga\_ d1a4fa\_ d3fh9b\_ d3bomb\_ d3cy5a\_ d3at5b\_  
d1x9fa\_ d2oifa\_ d4lmbx\_ d1cpcb\_ d3v57a\_ d1kn1a\_ d1cpc\_ d4f0ta\_  
d2vjha\_ d4po5b\_ d1eyxa\_ d1alla\_ d4f0tb\_ d1b33b\_ d1b8db\_ d4h0mb\_  
d1b33a\_ d2vjhb\_ d4l6b\_ d2vmlb\_ d1a11b\_ d2vjta\_ d3dbja\_ d2vmla\_  
d2vjtb\_ d4f0ub\_ d1f99b\_ d4rmpa1 d1liaa\_ d2uulb\_ d4lmsb\_ d4f0ua\_  
d2bv8a\_ d1f99a\_ d2bv8b\_ d2c71b\_ d3dbjb\_ d4rmpb1 d1b8da\_ d4h0ma\_  
d3v57b\_ d1kn1b\_ d1liab\_ d2uula\_ d2j96a\_ g1gxs.1 g1wht.1 d3c8da2  
d2pbla1 d1jkma\_ d1jjia\_ d1jjfa\_ d1g19b1 d1gkub2 d2qvba\_ d2v9za\_  
d4kafa1 d1xm5a\_ d1xaxa\_ d1tvia\_ d4iuua3 d4bvva\_ d5hpga\_ d3k65a\_  
d1ki0a3 d1ki0a2 d1ki0a1 d1a0ha1 d1pmla\_ d3sp8a3 d2feba1 d1mdwa\_  
d1qxp4 d1ziva1 d1zcm1 d1f74a\_ d3l21a\_ d2e1da\_ d1to3a1 d1w3ia\_  
d1sfla\_ d1n7ka\_ d1vcva1 d4imea\_ d1wa3a\_ d2ocza1 d1f2ja\_ d3m16a\_  
d2yxga\_ d1ub3a\_ d3a5fa\_ d1l6wa\_ d1xfba1 d1wx0a1 d1vpxa1 d1ojxa\_  
d1mxsa\_ d2a4aa1 d1xkya1 d3cq0a1 d3s1xa\_ d1f05a\_ d1fdja\_ d3cpra1  
d4d2ja\_ d1e88a1 d1l6ja5 d1l6ja4 d1eaka4 d1eaka3 d1h8pa2 d1h8pa1  
d1mbma\_ d3su6a1 d1cula1 d4agka\_ d1vcpa\_ d1q31a\_ g1n11.1 d3e90b\_  
d1ep5a\_ d3u1jb\_ d1dzka\_ d4tlja\_ d2a2ua\_ d4wfva\_ d3t1da\_ d4iixa\_  
d3zq3a\_ d2nnda\_ d1i4ua\_ d1kxo\_ d1bbpa\_ d1kt7a\_ d1exsa\_ d3s26a1  
d1lf7a\_ d1qfta\_ d4gh7a\_ d1z24a1 d1qabe\_ d1xkia\_ d3bx7a\_ d4iawa1  
d1n0sa\_ d1gkab\_ d3kzaa\_ d2k23a\_ d2l9ca1 d2joza1 d1gm6a\_ d3kffa\_  
d3saoa1 d1e5pa\_ d1yupa1 d1iiua\_ d4lu0a\_ d1of8a\_ d3unda1 d3e9aa1  
d1vr6a2 d1n8fa\_ d2qkfa\_ d1o60a\_ d1e69a\_ d1mv5a\_ d3g60a4 g1ii8.1  
d1ewqa2 d1ji0a\_ d1qhla\_ d1v43a3 d2wmfa1 d1vpla\_ d4a82a2 g1f2t.1  
d2d62a1 d3tuic1 d2bbsa1 d3g60a3 d2ixea\_ d1g6ha\_ d1sgwa1 d2qi9c\_  
d3r1fa1 d3b60a1 d3d31a2 d2pzea1 g1xew.1 d1jj7a\_ d1oxxk2 d2onka1  
d1wlwa\_ d1iwea\_ d1qf5a\_ d1vmaa2 d1nija1 d1np6a\_ d2p67a1 d3ihla\_  
d1okkd2 d1l1s1a2 d1s1ma2 d1liona\_ d2v40a\_ d1dj3a\_ d3hida\_ d2vo1a1  
d2g0ta1 d1vcoa2 d1j8mf2 d1g3qa\_ d1xjca\_ d1p9ba\_ d1ihua2 d1ihua1  
d2qm8a\_ d1dj2a\_ d4ioja\_ d1cp2a\_ d1yrba2 d1hyqa\_ d3gqba2 d1xp8a1  
d1tf7a2 d1tf7a1 d1ye8a1 d1skyb3 d2qe7d2 d4blta\_ d4huta\_ d3l1daa2  
d4hyya\_ d2i3ba1 d1cr1a\_ d3j9tb2 d3ntua2 d1vdza1 d2z43a\_ d1e9ra\_  
d1nlfa\_ d3ziaa2 d1n0wa\_ d1g6oa\_ d3ziad2 d3j9ta2 d1pzna2 d3gqbb2  
d2i49a\_ d1nnfa\_ d1xvxa\_ d1ursa\_ d1h3da1 d1iuda\_ d4m1va1 d1twya\_  
d3e13x\_ d2nxoa1 d4pfua\_ d3ttma\_ d1elja\_ d2qmwa1 d1us5a\_ d1y3na1  
d1jeta\_ d1uqwa\_ d4f19a1 d2esna2 d3thia\_ d3fasa1 d2uyeb\_ d2xwva1

d1r9la\_ d2fyia1 d1pb7a\_ d2ozza1 d1sw5a\_ d1nh8a1 d1vr5a1 d2g29a\_  
d1xs5a\_ d3lswa\_ d2z23a\_ d3w9va\_ d3tcha\_ d1q35a\_ d1z7me1 d3q27a\_  
d1p99a\_ d1ve4a1 d2i6ea1 d4mcoa1 d4n8ya\_ d1zbma1 d1hsla\_ d1ixca2  
d1j1na\_ d1xvya\_ d1y9ua\_ d2z22a1 d1xoca1 d4oera\_ d1wdna\_ d5f1qa1  
d1xt8a1 d1i6aa\_ d4gwoa\_ d4igta1 d1pc3a\_ d4mmpa1 d1o63a\_ d2cz1a1  
d2onsa2 d4mija1 d4ok5a1 d2bmfa1 d2bmfa2 d1yksa1 d1yksa2 d1jr6a\_  
d2qeqa1 d2j1qa1 d1eh3a\_ d3skpa\_ d1dtza1 d1dtza2 d1ieja\_ d1jnfa2  
d1jnfa1 d1b1xa2 d1b1xa1 d1jw1a1 d1jw1a2 d1ryoa\_ d1h76a1 d1h76a2  
d1c4oa1 d2p6ra3 d2p6ra4 d1oywa2 d1oywa3 d1wrba1 d1w36b2 d1w36b1  
d1c4oa2 d3bora\_ d1t6na\_ d2eyqa5 d2eyqa3 d2eyqa2 d2zu6a2 d1veca\_  
d1uaaa1 d1w36d1 d2g9na1 d1z3ix2 d2rb4a\_ d1hv8a1 d1hv8a2 d1t5ia\_  
d1w36c2 d2j0sa2 d2j0sa1 d1fuka\_ d3hjha1 d1z5za1 d1qdea\_ d1z63a1  
d1s2ma2 d1s2ma1 d1wp9a1 d1wp9a2 d1gm5a3 d1gm5a4 d3dina4 d3dina3  
d1q0ua\_ d1w36c1 d1z3ix1 d1nkta4 d1uaaa2 d1w36d2 g1qhh.1 d2fwra2  
d2fwra1 d2v8ta\_ d3q3ma\_ d1za0a1 d2inca\_ d1jk0a\_ d2incb\_ d1mhyb\_  
d3hflb\_ d1mtyb\_ d1r2fa\_ d2uw1a\_ d1mhyd\_ d3n37a\_ d1afra\_ d1oquc\_  
d1syya\_ d1mtyd\_ d2o1za\_ d1uzra\_ d1smsa\_ d2fkza\_ d1zuja1 d1s3qa1  
d2fjca1 d1z6om1 d1veia\_ d4dyya\_ d1jiga\_ d3gvya\_ d2pyba\_ d4cy9a1  
d3bvfa1 d1r03a\_ d2cf7a\_ d1nf4a\_ d1zs3a1 d4iwka\_ d3ka8a\_ d3np0x\_  
d1n1qa\_ d1lb3a\_ d4e6ka\_ d1z6oa1 d2fzfa1 d4dyua\_ d3ge4a\_ d1jgca\_  
d4am4a\_ d2z6ma\_ d1ji5a\_ d1vlga\_ d1lkoa1 d3qz3a\_ d1o9ra\_ d2ffxj\_  
d1euma\_ d1yv1a1 d2v2pa\_ d1j30a\_ d4di0a\_ d1dpsa\_ d1oewa\_ d2qzxa\_  
d2asia\_ d1psoe\_ d1miqa\_ d1smra\_ d2h6ta\_ d1pfza\_ d1lizda\_ d3hd8a\_  
d1j71a\_ d1dpja\_ d4aa9a\_ d1t6ex\_ g1b5f.1 g11ya.1 g1htr.1 d1qdma2  
d1bxoa\_ d1wkra\_ d1tzsa\_ d1libqa\_ d2qzwa\_ d1ex4a2 d1c6va\_ d1bdqa\_  
d3ggta\_ d3ixoa\_ d1mrxa\_ d2haha\_ d1tw7a\_ d4njsa\_ d1sgua\_ d2p3da\_  
d1nsoa\_ d3d3ta\_ d2rkfa\_ d1c6ya\_ d2rspa\_ d3ogpa\_ d3ekwa\_ d2o4na\_  
d2j9ja\_ d1baia\_ d3ggua\_ d3lzua\_ d4npua\_ d4j55a\_ d2r8na\_ d2fxda\_  
d2p3ca\_ d4dqea\_ d3ttpa\_ d3t3ca\_ d2p3aa\_ d2hc0a\_ d2fdda\_ d3mwsa\_  
d1k8rb\_ d1wgra1 d1ef5a\_ d1wfy1 d1e8ya3 d1wgya1 d2cs4a1 d1wxma1  
d2byea1 d3kh0a1 d2byfa1 d1wxaa1 d1e7ua3 d1h4ra3 d4y18a1 d2a16a3  
g1qmo.1 g1len.1 d3zyra\_ d1fnya\_ d1n47a\_ g21tn.1 d1avba\_ d3usua\_  
d1dhkb\_ d1f9ka\_ d1ukga\_ d1g8wa\_ d1g9fa\_ d3wcsa\_ d1g7ya\_ g1loe.1  
d1mvqa\_ d1hq1a\_ d1v6ia\_ d1dbna\_ d1qnwa\_ d1fx5a\_ d4l8qa\_ d1ioaa\_  
d3n35a\_ d1wgda1 d1wggal d4q5eb\_ d1wjna1 d1se9a\_ d3n3kb\_ d1wz0a1  
d1we6a1 d2m0xa\_ d2gbka\_ d3rt3b1 d1wh3a1 d1sifa\_ d2ekec2 d4ii2b1  
d4hk2a1 d1c3ta\_ d1m94a\_ d1wgha1 d1ttna1 d1j8ca\_ d1wx8a1 d3v6cb1  
d2ma9b\_ d4i61b1 d1bt0a\_ d2jvca1 d2k1fa\_ d1wxva1 d1wf9a1 d1t0ya\_  
d2io0b2 d1x1ma1 d2gbma\_ d1zw7a1 d2m17a\_ d1ud7a\_ d1we7a1 d2lwp1  
d2gbja\_ d1wjua1 d1v6ea1 d1v86a1 d4eewa\_ d1w1aa1 d4icva\_ d4gu2a\_  
d1wx7a1 d1wy8a1 d4hjka1 d2faza1 d1v5oa1 d3ruib\_ d1leo6a\_ d3waob\_  
d2r2qa1 d3m95a\_ d3wana\_ d1jx4a2 d3gv5b1 d1t94a2 d3bq0a2 d1yvca1  
d1yeza1 d2h0ba\_ d2erfa\_ d1h30a2 d3mw4a1 d1pz7a\_ d2r1ba\_ d3v64a1  
d1d2sa\_ d3bopa1 d3mw3a1 d1okqa1 d1okqa2 d2ftba\_ d1pmpa\_ d2rcqa1



d1fdqa\_ d4lkpa\_ d1sa8a\_ d1vyfa\_ d1lpja\_ d3vg7a1 d4azqa1 d5bvqa\_  
d1p6pa\_ d2qo4a\_ d1opba\_ d1yiva1 d1o1va\_ d4bvma1 d4tkba\_ d4i3ba\_  
d1bwya\_ d1ftpa\_ d1ggla\_ d4gkca\_ d1cbia\_ d3p6da1 d1kqwa\_ d2a0aa1  
d2bcgg1 d2bcgg2 d1d5ta1 d1lum8a\_ d1ixza\_ d1qvra2 d1qvra3 d1qzma\_  
d1sxjc2 d1jr3d2 d2p65a\_ d1l8qa2 d1g8pa\_ d3hu3a3 d1sxjd2 d1njfa\_  
d1in4a2 d1sxja2 d1tuea1 d2ce7a2 d1w5sa2 d1sxjb2 d1d2na\_ d1ny5a2  
d1ofha\_ d2gnoa2 d2a5yb3 d1fnna2 d1u0ja1 d1lv7a\_ d1iqpa2 d2fnaa2  
d1ixsb2 d4gita\_ d1sxje2 d1g41a\_ d2e3fa\_ d1mm0a\_ d2e3ea\_ d2l1da\_  
d2ny8x\_ d2e3ga\_ d2ny9x\_ d2nz3a\_ d2l1j7a\_ d1n4na\_ d2m8bb1 d2kyqa\_  
d3psma\_ d1jkza\_ d1jxca\_ d2g11a\_ d1ugla\_ d4uj0a\_ d2k4ua\_ d1hp2a\_  
d2lu9a\_ d1baha\_ d2meoa1 d1wm7a\_ d1hlya\_ d1n8ma\_ d1jlza\_ d1wpda\_  
d1c55a\_ d1pvza\_ d1wt7a\_ d1wz5a\_ d1m2sa\_ d1pjva\_ d1c49a\_ d1qkya\_  
d2ktca1 d1wmta\_ d1du9a\_ d1j5ja\_ d1r1ga\_ d1t0za\_ d2i61a\_ d1t1ta\_  
d1sn4a\_ d1kv0a\_ d2l1kba\_ d1npia\_ d1wwna\_ d1pe4a\_ d2kbka\_ d2li7a\_  
d1djta\_ d2kbha\_ d1dq7a\_ d1sega\_ d1omya\_ d1zywa1 d1n9wa1 d1bbua1  
d1e1oa1 d1c0aa1 d1l0wa1 d3a74a1 d1eova1 d1iyjb4 d1iyjb5 d1iyjb3  
d1o7ia\_ d4ipca1 d1x3ea\_ d4apva\_ d1jb7a1 d1jb7a2 d1jb7a3 d3kdfa\_  
d1ue1b\_ d1wjja1 d3eiva\_ d1xjva2 d1xjva1 d2ccza2 d1se8a\_ d1l1oc\_  
d1jb7b\_ d1qvca\_ d3ulla\_ d1qzga\_ d1miua4 d1miua5 d1miua3 d3g48a1  
d1gd7a\_ d1mkha\_ d1jjcb3 d1pyba\_ d1y14b1 d2nn6i1 d1i941\_ d2zjra2  
d1smxa\_ d2qamc2 d1hh2p1 d2r7da1 d1r12a2 d1wfga1 d3bzka4 d1x6oa2  
d3a0ja\_ d2j01d2 d2ja9a1 d4q15a\_ d1hr0w\_ d1luza\_ d2n3sa\_ d2vnud1  
d1h95a\_ d1go3e1 d2nn6h1 d1ne3a\_ d2mo1a\_ d1iz6a2 d1jjga\_ d1e3pa2  
d2ix0a3 d2ix0a2 d2lxja\_ d1ueba3 d1ueba2 d2z0sa1 d1u01a1 d2ix0a1  
d2eifa2 d2je6i1 d3i2za1 d2c35b1 d2ahob2 d1t9ha1 d3i4oa\_ d2qall1  
d1jt8a\_ d2nn6g1 d1g6pa\_ d3cama\_ d1i94q\_ d1c9oa\_ d1d7qa\_ d2ba0a1  
d2vnud2 d2vnud3 d1khia2 d2qalq1 d1wi5a1 d1xta2 d1ny4a\_ d1dgsa2  
d1fvia1 d1ckma1 d1p16a1 d1x9na2 d1f00i3 d1rpma\_ d2shpa1 d1yfoa\_  
d1l8ka\_ d2ooqa1 d1g4us2 d1p15a\_ d1lara2 d1wcha\_ d2fh7a2 d2fh7a1  
d1ohea1 d1ohea2 d2f4da\_ d1rxda\_ d2hxpa\_ d1xria\_ d1d5ra2 d1fpza\_  
d3ezza\_ d4y2ea\_ d3azya\_ d3wvja\_ d1upsa1 d1ajoa\_ d2hyka\_ d1ajka\_  
d2vy0a\_ d1o4ya\_ d3o5sa\_ d3d6ea\_ d3atga\_ d1dypa\_ d1lumza\_ d3i4ia\_  
d1c1la\_ d4lbqa\_ d1a78a\_ d1slta\_ d4no4a\_ d3zsja\_ d3duia\_ d1lis3a\_  
d1qmja\_ d1hlca\_ d1tdha3 d1q3ba3 d1ee8a3 d1k82a3 d3h33a\_ d1rwja\_  
d19hca\_ d1os6a\_ d3bxua\_ d3h4na\_ d1i77a\_ d3caoa\_ d1j0pa\_ d2ctha\_  
d1duwa\_ d1ofwa\_ d2e84a\_ d1hh5a\_ d3h34a\_ d1wioa4 d1vcaa1 d1dr9a2  
d1lic1a1 d2d9qb1 d2nxyb2 d1adqa1 d1fnga1 d1uvqb1 d1zs8a1 d2vola1  
d2vola2 d1mfbl2 d2jelh2 d1uwel2 d3qq4b1 d1kjvb\_ d1k5na1 d1osph2  
d4odhl2 d1ow0a1 d1ow0a2 d1bfob2 d3l9ra2 d3jtth1 d2fath2 d4elkb2  
d1fn4b2 d2xfxb\_ d1pg7x2 d1cqka\_ d4k71b2 d1lk2a1 d1eapb2 d4lfhg2  
d1i4fa1 d2nw2a2 d1kfah2 d1mhca1 d1h3ua1 d1wejh2 d1h0db2 d1a5fh2  
d1kcvh2 d1mjuh2 d1qqda1 d1kcrh2 d1k8ia1 d3huja2 d2nnab1 d1nfd2  
d3mffb2 d1s9va1 d1l1k3h2 d1q0xl2 d1fv1b1 d1neza1 d4rfeb2 d1r3ha1  
d1a6tb2 d1kjva1 d1pz5b2 d1onqa1 d2bc4a2 d1de4a1 d1k8da1 d1tcra2

d1dn0b2 d1nfde2 d2xwtb2 d1bfoa2 d1mexh2 d1iakb1 d1ypzf2 d4f7ea2  
d1q72l2 d2fbjh2 d1fe8h2 d1clzh2 d1fngb1 d1uvqa1 d1vgka1 d1c16a1  
d4j12a2 d4x99b2 d1igtb3 d1je6a1 d1q72h2 d1nldh2 d1teth2 d2hmic2  
d1i1ca2 d1i1ca1 d1k8ib1 d1q0yh2 d1kfal2 d3frua1 d1pg7w2 d1u58a1  
d1igyb4 d1igyb3 d1hyrc1 d1klub1 d1deeb2 d1c12b2 d2bc4b2 d2ig2h2  
d1kcvl2 d3wn5b1 d1l1k2b\_ d1l1k3l2 d1mju12 d1sm3h2 d1q0xh2 d1zvsa1  
d1ydpa1 d1u8ib2 d1ypze2 d1kcu2 d1op9a\_ d1y0la1 d1letzb1 d1legj11  
d2gsib1 d1nj9a1 d4jfhdl d1aqkl1 d1t2ja\_ d1lo4h1 d1zvya1 d3v4vl1  
d4enec1 d1kxtb\_ d5e8ea1 d2pxya\_ d4weud\_ d1xiwc\_ d2esvd1 d1qnzh\_  
d1logae1 d1f4xh1 d4n1hb\_ d3ezjb1 d3mlw11 d1kfah1 d1etza1 d1b4jh1  
d3cfic\_ d4w68a\_ d2arja1 d1ek3a\_ d2ok0l1 d1vera\_ d1uwgh1 d1blnb1  
d1fpth1 d1rzga1 d2giya1 d4m3kb1 d1nc2a1 d2nyyd1 d1ncna\_ d1fbih1  
d5dxwa\_ d4fqqa1 d1dqdh1 d1jfq11 d1kelh1 d1faih1 d1frgl1 d1figl1  
d4m6n11 d1fo0a\_ d4hxb11 d3b5ga\_ d3quyd1 d2h9gb1 d1i8kb\_ d2dd8h1  
d2ck0h1 d1eaja\_ d4w6wb1 d2a6ib3 d1t66d1 d2e27h\_ d1ob1b1 d1f11b1  
d2v7na1 d1ad0a1 d2xt1b1 d1pskh1 d4i13b1 d2op4l1 d1a0ql1 d1uwel1  
d1za3a1 d1ncb11 d4uu9a\_ d1bm3h1 d1cloh1 d1nqba2 d1cf8h1 d4y5va\_  
d1mhph1 d5anma1 d4cdgc1 d4ldeb\_ d1y0lb1 d2pcpb1 d1z3gl1 d1dfb11  
d1fh5h1 d3g5xa1 d1tzib1 d4dn3l1 d3zhka1 d2b1hh1 d2uyla1 d1f3dh1  
d1nj9b1 d2agjh1 d2h1pl1 d1q72h1 d8fabbb1 d1ndmb1 d1rjca1 d4u6hb1  
d3upca\_ d2fbj11 d1osph1 d1tvda\_ d2cjev\_ d4fhbd1 d1bd2d1 d1rz7h1  
d3nn8a\_ d1blna1 d1knoa1 d1nfda1 d2bmkb1 d1dq11\_ d1igyb1 d1igfl1  
d12e8h1 d3utza1 d1nc2b1 d1rihh1 d4mwf1 d4jvpa1 d1mieh1 d1rhfa1  
d1fgn11 d1sbsh1 d1lp9e1 d1dn0a1 d4lqf11 d1iaih1 d1kgcd1 d1mh5b1  
d1gpo11 d2g60h3 d1f8t11 d2jixd1 d4grwh\_ d1fo0b\_ d1bfob1 d1axsa1  
d1u9ka\_ d1nmbh\_ d1h8na1 d1h8na2 d1jguh1 d4eura1 d3sdy11 d35c8h1  
d1w72l1 d1mvub\_ d1i9rh1 d1ob1a1 d4wenb\_ d1yeeh1 d3ietc1 d1f58h1  
d1ad0b1 d1mqkl\_ d1nbvh1 d4b50a\_ d3r8bb\_ d1baf11 d1mamh1 d4rgne1  
d2gsgb\_ d35c8l1 d1bafh1 d1aih1 d2pcpa1 d2fath1 d2x1pa\_ d1orsb1  
d1ibgl1 d1shma\_ d1a2yb\_ d1u0qa\_ d2coqa\_ d1hilb1 d1qfwi\_ d1jv5b\_  
d1fn4b1 d5e0qa\_ d1nsnh1 d1plgl1 d4ocx11 d1kb5h1 d1rzfh1 d1pg7x1  
d2fx7h1 d2oi9c\_ d1l7i11 d3eyva1 d1d5i11 d4ffyl\_ d1tet11 d1a6wh\_  
d1ac6a\_ d3dvfa\_ d1nfde1 d1mimh1 d1ri8a1 d1jhlh\_ d3dura\_ d1fskb1  
d1f97a1 d3so3b1 d2ak4d1 d1lp9f1 d4z7wf1 d1l7th1 d4y5ya\_ d4x7ec1  
d1emth1 d1likf11 d1nlbh1 d4uta11 d1bjma1 d1eapb1 d1u6ah1 d2dtgd1  
d1kj2b\_ d1xeda1 d1c1eh1 d1fgvh\_ d2bnub1 d2fb4h1 d2dtgb1 d1ktrh\_  
d1jp1h1 d1qkz11 d4hepg\_ d2atpb1 d1flrh1 d2hrp11 d1mvfa\_ d1iaim1  
d3k80a1 d2jb5h1 d3zkxc\_ d4grwe\_ d1it9h1 d1rhhb1 d3w9ec\_ d1e4wh1  
d1sy6h1 d2j6eh1 d3qxta\_ d1jglh1 d1p7ka1 d1tzhb1 d4n8pa1 d1gaf11  
d2jelh1 d1wioa2 d4i0cc1 d1cicb1 d1lmka2 d1lmka1 d1iqwh1 d1orqb1  
d1ejoh1 d1jnlh1 d4zga1\_ d43c9b\_ d1ggbl1 d1wejh1 d3q6fa1 d1f3dj1  
d3c6la1 d1bqlh1 d3p9wb\_ d1a3rl1 d1h0db1 d2uzil\_ d1eo8l1 d1qfwl\_  
d1n7ml1 d1igja1 d1c5ch1 d2a9mh\_ d1rmfh1 d1fj1b1 d4heme\_ d1ccza1  
d1a5fh1 d1ogad1 d1dlfh\_ d1qa9b\_ d1vgel1 d3qskb\_ d1sjxa\_ d4ozfg1

d1sq2n\_ d1qd0a\_ d1kcvh1 d1c5db1 d3qcul1 d8faba1 d3bn9d1 d1mjuh1  
d4y8dc\_ d7fabh1 d3dvgb1 d1lo0l1 d1a6tb1 d1gigh1 d1kcrh1 d2hwz11  
d1yjdcl d3clfl1 d4krna\_ d1d17l\_ d1e6o11 d1mexh1 d3r0ma\_ d4kkna\_  
d1fns11 d1loaqh\_ d1rzia1 d1lucbh1 d1ncw11 d4b41a\_ d1nfdfl d2mpah1  
d2d7tl1 d4grwf\_ d4b5ea\_ d1lk3h1 d3u79a\_ d4u3xa\_ d1ghfl1 d1bvkb\_  
d1mcww1 d1b88a\_ d1jrhh1 d32c2b1 d4wemb\_ d1dsfh\_ d1op3h1 d1ce111  
d1iqda1 d1qoka1 d1qoka2 d1qfuh1 d2crya1 d1ay1h1 d1loaql\_ d3ab0b\_  
d1rur11 d1t4kb1 d1bz7b1 d1n0xh1 d1for11 d1lucb11 d4w6yb\_ d43c9a\_  
d2aabl1 d1tzia1 d4n1ca\_ d1k6qh1 d3g9ab\_ d4tvsa1 d1ligmh\_ d1pz5b1  
d3dx9a1 d3wxwh\_ d1nakh1 d1kcul1 d3eaka\_ d4qlra1 d1cr9l1 d1d9ka\_  
d1f4xl1 d1deea1 d2i27n2 d1c12a1 d2orb11 d1j8hd1 d1mcp11 d1c5da1  
d1kenh1 d1bd2e1 d1h5ba\_ d4x7fc1 d3upaa\_ d1t3fa1 d1indh1 d2dtgc1  
d4hc111 d1zv5a1 d4wgvb\_ d1uwgl1 d4f37k1 d1laqkh1 d1vesa\_ d3zkqd\_  
d1fpt11 d1lo4l1 d1knob1 d3rrqa\_ d4orz\_ d1mlbb1 d4hgkc1 d1dqdl1  
d1bogb1 d4ozhe1 d1dr9a1 d1i7za1 d1dn0b1 d1kell1 d1rzi11 d1ypzf1  
d1wtla\_ d1hkfa\_ d1fail1 d1figh1 d2vyre\_ d1sjva\_ d1ohqa\_ d1bfoa1  
d1pkqb1 d1mjul1 d1b4j11 d1nsl1 d2arjb1 d1p4bh\_ d4aj0a\_ d3nn8b\_  
d2rcja1 d1f2xk\_ d4v1dd\_ d1adqh1 d2eksa\_ d4k3ga\_ d1jfqh1 d1uweh1  
d1frgh1 d4gftb\_ d1uz8b1 d4nlea\_ d1bm311 d1clol1 d3mcka1 d2vq1a1  
d1ae6h1 d4aq1b1 d1uj3b1 d1nbqa1 d1fh511 d2ck011 d2ywza\_ d1q7211  
d4nbxb\_ d1hila1 d4hz1b1 d2j8811 d1zmya1 d1cd0a\_ d1a4ka1 d1pskl1  
d1a0qh1 d4krmb\_ d1ncbh1 d2fbjh1 d1j8he1 d1i3ua\_ d1cf811 d1fe8h1  
d2p1ya1 d1eeqa\_ d2x89a\_ d1ol0a\_ d2r0lh1 d1ub5a1 d1dfbh1 d3eyvb1  
d4jdvb1 d4p2cg\_ d2gsia1 d2agj11 d1u3ha1 d2h1ph1 d1rih11 d1fskc1  
d1boga1 d2a7711 d1ospl1 d1qfoa\_ d3dwta\_ d2fx711 d1rz711 d3stba1  
d1pkqa1 d1b6da1 d1dzba2 d1dzba1 d1kj2a\_ d4l1ha\_ d1rzgb1 d1dq1h\_  
d12e811 d1miel1 d1jmaa\_ d1sbs11 d1fgnh1 d1f5811 d1mqkh\_ d1ndgb1  
d3qeg11 d1iail1 d2aw2a1 d1tqbc1 d3fo2a1 d4dkaa\_ d1f8th1 d2g6011  
d2ywy\_ d1uj3a1 d1yc7a\_ d3bd3a\_ d4w6xb1 d1nmb1\_ d1i8ka\_ d1rjlb1  
d1ypze1 d1p7kb1 d1kxqe\_ d1gpoh1 d2z4qa1 d1w72h1 d1i9rl1 d4qgya1  
d4xt1c\_ d2qqnh1 d1cica1 d3c08h1 d2cd0a\_ d2bdnh1 d1hnga1 d1mam11  
d1nldh1 d1cr9h1 d4lcih1 d3bkyh1 d3qg711 d1ai111 d1kxvc\_ d4iosd\_  
d117ih1 d2x1qa\_ d1ub6b1 d3k74b\_ d1libgh1 d1teth1 d1lgya1 d1hxma1  
d2x6ma\_ d2e71a\_ d5e03a\_ d1qfwm\_ d2r0kh1 d1igjb1 d1rurh1 d1plgh1  
d1mj8h1 d1yuhb1 d3fmg11 d1rzfl1 d1emt11 d1ad9b1 d1lgtb1 d1nlb11  
d1d5ih1 d3k7ua\_ d4ffyh\_ d1bwwa\_ d3dvga1 d1a6ta1 d1fgvl\_ d4qxgl1  
d1mim11 d1jh11\_ d2hffb1 d2hh011 d1qkzh1 d1l7t11 d1lafvh1 d1iaii1  
d2cjuh\_ d1um5h1 d2ghwb2 d2ghwb1 d1kgce1 d2fgwh1 d1ikfh1 d1dvfd\_  
d2i24n1 d2xtjb\_ d1za3b1 d2yc1a\_ d2hh0h1 d2x1oa\_ d1bvka\_ d1rjla1  
d5e7ba1 d1igta1 d1i11b1 d2fb411 d1mvua\_ d1jpt11 d32c2a1 d1fvca\_  
d1iqdb1 d2hrph1 d2p4ab\_ d4qo1a\_ d1p2cb1 d1wt5c\_ d1t4ka1 d5c1mb\_  
d1it911 d1bz7a1 d1b2wh1 d1e4wl1 d1jn111 d1yedb1 d1za6b1 d3u7aa\_  
d1igfh1 d3gnml1 d1orsa1 d1wejl1 d1a2ya\_ d1hxmb1 d1gafh1 d2j4wh1  
d1pz5a1 d1j05a\_ d1a3rh1 d4fq111 d1qfwh\_ d1eo8h1 d1n7mh1 d4s11a\_

d1kegh1 d5da4a\_ d1iqw11 d3whxb1 d1vgeh1 d1deeb1 d1c12b1 d1t2q11  
d1ad9a1 d3gsnb1 d3b2uc1 d1ggbh1 d1t3fb1 d1nak11 d4ocmc\_ d1lila1  
d2v7hb3 d2esve1 d1mcoh1 d2qr0b1 d2q3aa\_ d1ct8a1 d1kcr11 d2pxyb\_  
d2uzih\_ d5c3ld\_ d3durb\_ d1c5c11 d2ak4e1 d1d17h\_ d1xiwd\_ d1mlba1  
d1rmf11 d1i7zb1 d1d1f1\_ d2xa3a\_ d5bq7b1 d1dqqb1 d3h4211 d1egjh1  
d1kcv11 d1fe811 d2j6e11 d1f3rb2 d11k311 d1sm3h1 d1q0xh1 d1ghfh1  
d7fab11 d1igch1 d11o0h1 d4idla\_ d5c2b1\_ d1jrh11 d1i11a1 d3zhda1  
d4kfzc\_ d1b0wa\_ d1e6oh1 d1mex11 d4krpb\_ d1fnsh1 d1ncwh1 d4hgma\_  
d4eigb1 d4rzca\_ d2mpa11 d4y5xa\_ d5en2b1 d3lrga1 d4ej1c1 d1rhha1  
d1j05b\_ d1forh1 d1q9wb1 d2wzpd\_ d2aq2a1 d1h0da1 d3revb1 d2ij0c1  
d1tzh11 d4m7j11 d1k6q11 d3b9kc1 d1igml\_ d3qeua1 d1dsfl\_ d1celh1  
d1kcu11 d1zvha1 d1zvoa1 d1tqbb1 d1ay111 d2qsc11 d2cgrh1 d1n10h1  
d1ken11 d3eo0a1 d4n9ob1 d1n0xl1 d3k1kc\_ d2m9wa1 d3dfxa\_ d2aq2b1  
d1ck1a1 d1enfa1 d1i4pa1 d1v1oa1 d1et9a1 d1esfa1 d2g9hd1 d4ohja1  
d1klud1 d1bxta1 d1ty0a1 d1fnua1 d2qaln1 d2cqva1 d1fhga\_ d2k1ma\_  
d2d12a1 d1biha3 d1biha1 d1biha4 d3qp3a1 d1glca\_ d1gxea\_ d1cvsc2  
d1cvsc1 d1xmwa2 d1m4ka2 d2otpa2 d1biha2 d1rhfa2 d2fcba2 d2fcba1  
d1wwbx\_ d1gsma2 d1epfa1 d1epfa2 d2dava1 d1waaa\_ d1f97a2 d1x44a1  
d1vcaa2 d1fnla2 d1fnla1 d3b5ha2 d3h8na2 d3h8na1 d1bjba1 d1bjba2  
d1pd6a\_ d1f2qa2 d1f2qa1 d3cx2a\_ d1nbqa2 d3b5ha1 d1n26a1 d1xiwb\_  
d1xaua\_ d1fltx\_ d2ifga1 d1olla1 d1olla2 d1cs6a4 d1cs6a3 d1cs6a2  
d1cs6a1 d2gw5a2 d1sy6a1 d1xiwa\_ d1ucta2 d1ucta1 d1ry7b2 d1gl4b\_  
d1qz1a3 d1olza1 d2c9aa1 d1wwca\_

**Family-11 (a.26.1.3)**

**Positive dataset contains 6 protein sequences.**

d4x51a\_ d4ypgc1 d3oq3a\_ d1wu3i\_ d3bes1\_ d3ux9a\_

**Negative dataset contains 3997 protein sequences.**

d1m32a\_ d1libja\_ d1c7na\_ d1liuga\_ d4q75a\_ d2bkwa1 d1t3ia\_ d1n8pa\_  
d1qz9a\_ d1jff9a\_ d1leg5a\_ d1p3wa\_ d3kgwa\_ d1c11a\_ d2ctza1 d1vjoa\_  
d2rfva\_ d1gc0a\_ d1cs1a\_ d1d2fa\_ d2ch1a1 d1qgna\_ d1pffa\_ d1ax4a\_  
d1c7ga\_ d2v1pa1 d2ez1a\_ d1u08a\_ d1lc5a\_ d1b5pa\_ d2ay1a\_ d1bw0a\_  
d3pd6a\_ d7aata\_ d2csta\_ d1j32a\_ d1fg7a\_ d4wlha\_ d1o4sa\_ d1v2da\_  
d1gdea\_ d1m6sa\_ d1v72a1 d1svva\_ d1ajsa\_ d1wsta1 d2f8ja2 d1lk9a\_  
d1vp4a1 d1xi9a1 d2gb3a1 d1yaaa\_ d2bnma2 d3i2ka1 d1lnsa3 d2cfba1  
d1o69a\_ d1bj4a\_ d3k28a\_ d2bwpa\_ d3lg0a\_ d2fnua\_ d3ou5a\_ d1z7da1  
d1b9ha\_ d1iaya\_ d4msoa\_ d1bs0a\_ d1s0aa\_ d1sffa\_ d3tqxa\_ d1mdoa\_  
d3qboa\_ d3pgya\_ d1bjna\_ d2dkja\_ d1ejia\_ d1vefa1 d4wxga\_ d3bs8a\_  
d3gbxa1 d1w23a\_ d1r0ka3 d1j5pa3 d1vkoa2 d1vm6a2 d3qvsa2 d1gr0a2  
d1p1ja2 d1f56a\_ d1bypa\_ d1azca\_ d1ws8a\_ d3u25a\_ d1cuoa\_ d1id2a\_  
d1rkra\_ d2iaac\_ d4dp1x\_ d1nwpa\_ d2gima\_ d2i7sa\_ d1qhqa\_ d3ehbb1  
d1fftb1 d1gyca3 d1hfua2 d1kbva2 d1sdda1 d1sdda2 d1gyca1 d1gyca2  
d1mzya1 d2bw4a1 d1aoza1 d1aoza3 d1aoza2 d1kyaa2 d1kyaa3 d1kyaa1  
d1mzya2 d4e9sa1 d1sddb1 d1sddb2 d1hfua1 d1hfua3 d1oe1a2 d1oe1a1  
d1v10a2 d1v10a3 d1v10a1 d1rypd\_ d1irua\_ d1rypc\_ d3unfk\_ d1rypa\_

d1j2pa\_ d1irui\_ d1j2qh\_ d3unfh\_ d1m4ya\_ d1rypb\_ d1irul\_ d1irug\_  
d1iru2\_ d1q5rh\_ d1rypg\_ d1g3ka\_ d1iruf\_ d1q5qa\_ d1e94a\_ d1irub\_  
d1ryph\_ d3ty6a\_ d1iruj\_ d1iruk\_ d1rype\_ d1irud\_ d1irue\_ d3mi01\_  
d1rypf\_ d2z3ba\_ d1iruc\_ d3mka2\_ d1irul\_ d1a3qa1 d1iknc\_ d3brda1  
d1p7h11 d1oy3c\_ d1imhc1 d1zk9a1 d2cxka1 d2bema\_ d1ea9c1 d1qhoa1  
d2fhfa2 d2fhfa1 d1k3ia1 d1j0ha1 d1cxla1 d2bhua1 d1edqa1 d1f1sa2  
d1ut9a2 d1gvia1 d1txka1 d4alac\_ d1pjwa\_ d1s6na\_ d3uzqb\_ d1jgta2  
d1ofda3 d1ea0a3 d1ecfa2 d1q15a2 d1ao0a2 d1te5a\_ d1ep0a\_ d2pa7a1  
d1wlta1 d2c0za1 d1nepa\_ d1ktja\_ d1ds6b\_ d1fstb\_ d1ex0a1 d1g0da1  
d4w9ta\_ d4x2ra1 d1ka9f\_ d1qo2a\_ d4axka1 d1thfd\_ d1h5ya\_ d4u28a\_  
d2y88a\_ d4wd0a\_ d1vzwa1 d2bjca1 d2hsga1 d1qpza1 d1efaa1 d1au7a2  
d1e3oc2 d2ovga\_ d1sq8a\_ d1rzsa\_ d3kz3a\_ d3orca\_ d3gpdg2 d2q49a2  
d1hdgo2 d2g17a2 d2cvoa2 d2czca1 d3pwka2 d1obfo2 d1i32a2 d1zyao2  
d2pkqo2 d1b7go2 d2hjsa2 d1cf2o2 d1vkna2 d1nvmb2 d2msya\_ d2djoa1  
d2r5za\_ d1au7a1 d1f43a\_ d2lmda1 d1akhb\_ d1s7ea1 d3nara\_ d1zq3p1  
d2craa1 d1mija\_ d4uuta\_ d3a01a\_ d1x58a1 d3rkqa1 d3cmya1 d2cqxa1  
d2da6a1 d1e3oc1 d1fjla\_ d1mh3a1 d1ig7a\_ d1x41a1 d1wh7a1 d1gt0c1  
d2mw8a\_ d1x2ma1 d1b72a\_ d1wi3a1 d1jgga\_ d1wjha1 d1x2na1 d1mnmc\_  
d2cuea1 d3k2aa\_ d2hosa\_ d2jwta2 d1pufa\_ d1octc1 d2hi3a\_ d1b8ia\_  
d4j19a\_ d3lnqa\_ d1wh5a1 d1b8ib\_ d1fexa\_ d2cqra1 d1guua\_ d1ug2a1  
d2cqqa1 d2ajea1 d4a69c\_ d1h8ac1 d2crga1 d2iw5b1 d1xc5a1 d1ofcx1  
d2cu7a1 d1wgxa1 d2cjja1 d2ckxa1 d1gvda\_ d1hcra\_ d1tc3c\_ d1u78a2  
d6paxa1 d6paxa2 d1k78a1 d1k78a2 d1hlva1 d1hlva2 d1iufa2 d1iufa1  
d2dara2 d2dara1 d1wyha2 d2dloa2 d1rutx4 d1rutx3 d2cuqa2 d1x41a2  
d1x41a1 d1x3ha2 d1x3ha1 d2d8za1 d1x61a2 d1x6aa1 d1x6aa2 d2cora2  
d2cora1 d1v6ga1 d1v6ga2 d2d8za2 d1x64a1 d1x64a2 d1b8ta1 d2co8a1  
d1x63a2 d2dj7a2 d2dj7a1 d2cu8a2 d2cu8a1 d1g47a2 d1g47a1 d1j2oa1  
d1wyha1 d2dloa1 d1wiga1 d1wiga2 d2cupa2 d2cupa3 d1x68a1 d2d8ya2  
d2d8ya1 d1m3va2 d1x62a1 d1x68a2 d1x61a1 d1b8ta3 d1b8ta2 d2d8xa2  
d2d8xa1 d1x4ka1 d1x4ka2 d2cuqa1 d1m3va1 d2co8a2 d1x63a1 d2cura1  
d2cura2 d1x62a2 d2iu5a1 d1zk8a1 d2g7sa1 d2fd5a1 d2np5a1 d1z0xa1  
d2id6a1 d2d6ya1 d2i10a1 d2oi8a1 d3c07a1 d2ns7a1 d2fq4a1 d2yvea1  
d1t33a1 d2o7ta1 d1rkta1 d2np3b1 d2g7ga1 d2gena1 d2fbqa1 d2g71a1  
d2gfna1 d2g3ba1 d2jj7a1 d2hyja1 d1sgma1 d1ui5a1 d2hkua1 d2id3a1  
d4jyka1 d3lv8a\_ d1s3ga1 d1zaka1 d1s4qa\_ d3tvta2 d1uf9a\_ d1khta\_  
d1ckea\_ d1osna\_ d1p5zb\_ d4tmka\_ d3cm0a\_ d1tmka\_ d1jaga\_ d3h86a\_  
d1t0hb\_ d1nn5a\_ d2h92a\_ d3kb2a1 d2c95a1 d1yj5a2 d1kgda\_ d1ly1a\_  
d2ak3a1 d1vyva2 d1deka\_ d2grja1 d1p3ja1 d1y63a\_ d1e4ya1 d1s96a\_  
d3iija1 d1lvga\_ d1nksa\_ d1vyua2 d4e22a\_ d1qf9a\_ d1jjva\_ d1q3ta\_  
d1ki9a\_ d1lw7a2 d1teva\_ d1kjwa2 d1gsia\_ d2iyva2 d1kaga\_ d1viaa\_  
d1e6ca\_ d1g3ma\_ d1j99a\_ d1t8ta1 d1nsta\_ d1fmja\_ d1zrha\_ d1ls6a\_  
d2a3ra\_ d1aqua\_ d2zptx\_ d3ckla\_ d1texa\_ d1q44a\_ d2gwha\_ d1z0ja1  
d3umra2 d3gj0a1 d2gaoa1 d1yzga1 d1x3sa1 d1g7sa4 d1puja\_ d1udxa2  
d1kk1a3 d2o52a\_ d1jwyb\_ d1zcaa2 d1zcba2 d2fv8a1 d2cjwa\_ d3dz8a1

d1xzpa2 d1vg8a\_ d4qxaa\_ d2ew1a1 d1x1ra1 d2bcgy\_ d3doea1 d3cona\_  
d3rega\_ d3wyga\_ d1upta\_ d2b6ha1 d1zd9a1 d1lnza2 d1r5ba3 d1n0ua2  
d1r2qa\_ d2f91a1 d2rhda\_ d3q3jb\_ d3q85a\_ d1efma1 d1r8qa\_ d2gf9a1  
d2akab1 d1ek0a\_ d1z08a1 d2gcoa1 d2dy1a2 d4g01b\_ d2cxxa1 d1svia\_  
d3q72a\_ d1ni3a1 d4ac9a4 d2erxa1 d2bmea\_ d1wxqa1 d2gf0a1 d4ldja1  
d1zunb3 d1d5ca\_ d4lv5b\_ d1efca3 d1kmqa\_ d2g6ba1 d3lrpa\_ d1tada2  
d2y8ea\_ d4rd4a1 d1z06a1 d2heia\_ d3a58b\_ d1u01a2 d1d2ea3 d1zj6a1  
d2ocba\_ d3rwoa\_ d1mr3f\_ d2e9sa1 d4u5xa1 d2iwra\_ d2fn4a1 d3bwdd\_  
d2nzja1 d2atva1 d2ksqa\_ d3l43a\_ d1mkya2 d1mkya1 d1wmsa\_ d1jnja3  
d2rmka\_ d1f6ba\_ d1f60a3 d1gota2 d1jala1 d2fh5b1 d1g16a\_ d2wblc\_  
d1m7ba\_ d1wf3a1 d1f5na2 d1t9ha2 d1z6xa1 d1z0aa1 d2fg5a1 d2a5ja1  
d2bcjq2 d1s0ua3 d1ky3a\_ d4y0va\_ d4lhwa\_ d2qmea1 d2atxa1 d1legaa1  
d1ryha\_ d1moza\_ d1nrjb\_ d2erya1 d3bfka\_ d1puia\_ d1fzqa\_ d3j3az1  
d3t5ga\_ d1shza2 d3defa\_ d2f7sa1 d3raba\_ d3tsoa\_ d3aq4a\_ d2a17a1  
d3sfva1 d3bc1a\_ d2ncda\_ d1sdma\_ d3h4sa1 d2heha\_ d2grya\_ g3kin.1  
d1kk8a2 d1br2a2 d1goja\_ d1f9va\_ d2mysa2 d1lkxa\_ d3t0qa\_ d4db1a1  
d3gbja\_ d1ry6a\_ d1k8ka2 d1k8ka1 d3uleb1 d3i33a2 d3i33a1 d1bupa1  
d1dkgd2 d1dkgd1 d4ci6a2 d1jcfal d4a2ba2 d2fxua1 d1yaga2 d1yaga1  
d4cbua2 d1bupa2 d3vrda1 d3vrda2 d1fcdc2 d1fcdc1 d1h1oa2 d1m70a2  
d1m70a1 d1iqca2 d1iqca1 d1eb7a1 d1nmla2 d1nmla1 d1nira1 d1qksa1  
d1hroa\_ d4gedb\_ d3zooa\_ d1mz4a\_ d1gu2a\_ d1f1fa\_ d1dvva\_ d1c6ra\_  
d1c75a\_ d1e29a\_ d1gdva\_ d1cnoa\_ d1h32b\_ d1co6a\_ d2bh4x\_ d2aiua\_  
d5cytr\_ d1jdla\_ d1i8oa\_ d2zboa\_ d3dmia\_ d1ls9a\_ d1wvec\_ d2yk3a\_  
d3ph2b\_ d1dw0a\_ d5aura\_ d1ql3a\_ d1qn2a\_ d1f1ca\_ d4zzva\_ d2xspa\_  
d1eg1a\_ d4v20a\_ d1ojja\_ d4ipma1 d4csia\_ d3pfza\_ d3ovwa\_ d2yoka\_  
d2nqya\_ d1h4ga\_ d1hixa\_ d1oa2a\_ d1olra\_ d3b7ma\_ d4h7ma1 d3wp3a\_  
d2vgda\_ d1ligoa\_ d3zsea\_ d2nlra\_ d3wx5a\_ d1oa3a\_ d1pvxa\_ d1m4wa\_  
d1f5ja\_ d1oa4a\_ d4ix1a1 d4dnxa2 d1m8pa2 d1g8fa2 d1jhda2 d1x6va2  
d2e17a\_ d1iq0a2 d1irxa2 d1r6ta2 d1ivsa4 d2cyba\_ d1rqga2 d1j09a2  
d2yxna\_ d1f7ua2 d1h3fa1 d1ffya3 d2g36a1 d1nzja\_ d1jila\_ d1n3la\_  
d1i61a\_ d1pfva2 d1h3na3 d3n9ia\_ d3sz3a1 d1cwva5 d3sw2a\_ d1moxc\_  
d1dx5i3 d1edmb\_ d1autl2 d1autl1 d1nqlb\_ d1dval1 d1szba2 d1kigl\_  
d2y5fl\_ d1ijqa2 d1gk5a\_ d1gl1sa2 d1nt0a3 d1xdtr\_ d1lmja2 d1lmja1  
d1nzia2 d2wphe\_ d1klil\_ d1pfxl2 d1pfxl1 d1p9ja\_ d1g1ta2 d1f7ea\_  
d4yzub\_ d1lr7a1 d2y5ia\_ d1qlsa\_ d1psra\_ d3n22a\_ d2egda\_ d4ggfc\_  
d2wcea\_ d2luca\_ d4aqia\_ d3nsia\_ d2lp3a\_ d1j55a\_ d1a4pa\_ d1k8ua\_  
d1nsha\_ d1exra\_ d1tiza1 d1nyaa\_ d1g8ia\_ d1ggwa\_ d1wdcc\_ d3fwba\_  
d1ggza\_ d2o5ga\_ d1ctaa\_ d1m45a\_ d3i5gc\_ d1sl8a\_ d1fpwa\_ d2scpa\_  
d2roaa\_ d4aqra\_ d3pn7b\_ d1br1b\_ d2mysb\_ d1s6ca\_ d1bjfa\_ d2obha\_  
d1jfka\_ d1jf0a\_ d1qv0a\_ d1lkja\_ d2mlfc\_ d2m97a\_ d2d8na\_ d4by5a\_  
d1jbba\_ d4nqga\_ d1wdcb\_ d2mysc\_ d1j7qa\_ d1s6ia\_ d1uhka2 d1r2ua\_  
d1dtla\_ d3kf9a\_ d3pn7c\_ d1qjta\_ d1fi6a\_ d1c07a\_ d5d67d\_ d1tuza\_  
d1h8ba\_ d1eg3a1 d1eg3a2 d2zkmx1 d1snla\_ d1gjya\_ d1y1xa\_ d1hqva\_  
d1dvia\_ d1df0a1 d1qxp2 d4usla\_ d1k94a\_ d1wkya2 d1uuqa\_ d3wh9a\_

d4m1ra\_ d1xyza\_ d4xuya\_ d2je8a5 d4bf7a1 d3cuia\_ dlur4a\_ d1qw9a2  
d1odza\_ d2vzsa5 d1bqca\_ d2x2ya1 d1hjqa\_ d1qnra\_ d4y7ea1 d1vjza\_  
d4k68a\_ d2v3ga\_ d4hpga\_ d1nofa2 d1nq6a\_ d1h4pa\_ d1aq0a\_ d3ziza\_  
d4bs0a\_ d1ecea\_ d1h1na\_ d1ta3b\_ d1w91a2 d1l1wa\_ d1uhva2 d1us3a2  
d1legza\_ d7a3ha\_ d1tvna1 d3nyda1 d1ghsa\_ d2cyga1 d4xv0a\_ d2c8na2  
d1w32a\_ d3emca\_ d1v6ya1 d1foba\_ d2uwfa1 d2fgla\_ d3niya1 d2c0ha1  
d1rh9a1 d1yq2a5 d1szna2 d1fa2a\_ d1pama4 d5do8a1 d1ea9c3 d1hx0a2  
d2fhfa5 d1qhoa4 d1avaa2 d1m53a2 d4m8ua1 d2gjpa2 d1lwha2 d4howa1  
d1ktba2 d1j0ha3 d3vm5a1 d2x1ia\_ d1wzaa2 d1uasa2 d2diea1 d1mxga2  
d1ht6a2 d1eswa\_ d1iv8a2 d5cpsa\_ d1ud2a2 d1zjaa1 d3gbea1 d1kwga2  
d1wdpa\_ d1gcya2 d1g5aa2 d1hvxa2 d3dhpa2 d2bhua3 d4do4a1 d3qgva1  
d1e43a2 d1g94a2 d2d3na2 d1gjwa2 d1gvia3 d1x1na1 d1r7aa2 d1tz7a1  
d2x42a1 d1tr9a1 d3abza1 d4c7ga2 d2gjxa1 d1jaka1 d1yhta1 d4toqa\_  
d1wb0a1 d1w9pa1 d1eoka\_ d1itxa1 d1kfwa1 d1goia2 d1ledqa2 d2gsja\_  
d1hjxa1 d1jnda1 d1vf8a1 d1umqa\_ d1g2ha\_ d1e5wa2 d1j19a2 d1isna2  
d2a16b2 d1g4ma1 d1g4ma2 d1id1a\_ d2hmta\_ d2v76a\_ d1wj1a1 d1aqca\_  
d1qqga2 d1qqga1 d1ntva\_ d1n3ha\_ d4dbba\_ d3f0wa1 d1p3ra\_ d1wgua1  
d2cy4a1 d3hqca\_ d1wvha1 d1xr0b1 d1wgqa1 d1v89a1 d2coda1 d1zc3b\_  
d1wg7a1 d1u5ea1 d1v61a1 d2coca1 d2ys1a1 d1v5pa1 d1ntya2 d1wjma1  
d1wila1 d1u29a\_ d1xx0a1 d1unqa\_ d2zkmx3 d1fhoa\_ d1v88a1 d2adza1  
d1x1fa1 d1p6sa\_ d2coaa1 d1btka\_ d1v5ma1 d1faoa\_ d2x18a\_ d1x1ga1  
d4kaxb\_ d2j59m1 d1kilb2 d1xcga2 d1txda2 d1u5da1 d1dbha2 d1wlha\_  
d1upqa\_ d1v5ua1 d1foea2 d2fjla1 d1eaza\_ d2dfka2 d2cofa1 d1kz7a2  
d91dta1 d2ewda3 d1up7a1 d2dfda1 d1s6ya1 d1vjta1 d7mdha1 d1hyea1  
d1t2da1 d1ojsa3 d1ldna1 d1hyha1 d1civa1 d2a92a1 d1ez4a1 d1i0za1  
d1y6ja1 d1gv0a1 d1ur5a1 d1lllda1 d1lobba1 d1v8ba1 d1gdha1 d1l7da1  
d2dlda1 d1mx3a1 d1ygya1 d1qp8a1 d1j4aa1 d2naca1 d1npya1 d3t4ea2  
d1a4ia1 d1o0sa1 d2hk9a2 d2egga2 d1b26a1 d1bvua1 d1gq2a1 d1c1da1  
d1leha1 d1gtma1 d1euza1 d1nvtal d3dona2 d1edza1 d1gpja2 d1vi2a1  
d1p77a1 d1nyta1 d1b0aa1 d1v16a1 d1v91a1 d1txga2 d3f47a1 d1mv8a2  
d2pv7a2 d1xc2a3 d2ahra2 d4xiya1 d2f1ka2 d1pgja2 d1i36a2 d1np3a2  
d1lj8a4 d1teaa3 d1qmgga2 d2i76a2 d2g5ca2 d1wdka3 d1dlja2 d3cuma3  
d1kola2 d1f8fa2 d1qora2 d1jqba2 d1vj0a2 d1cdoa2 d1gu7a2 d1d1ta2  
d1xa0a2 d2dm6a2 d1jvba2 d1rjwa2 d1lllua2 d1h2ba2 d1tt7a2 d1piwa2  
d1o89a2 d1liz0a2 d1e3ja2 d1yb5a2 d1uufa2 d1vj1a2 d3gpdg1 d1vc2a1  
d2nvwa1 d1u8fo1 d1ydwa1 d1hdgo1 d2g17a1 d1cf2o1 d2czca2 d1r0ka2  
d1obfo1 d2cvoa1 d1ebfa1 d1h6da1 d1i32a1 d1zh8a1 d2q49a1 d1qkia1  
d1j5pa4 d3pzra1 d1xeea1 d1vkoa1 d1vm6a3 d3qvsa1 d2pkqo1 d1b7go1  
d1gr0a1 d1p1ja1 d1lc0a1 d1j0xo1 d3pwka1 d2hjsa1 d1zyao1 d1vkna1  
d1tlta1 d1nvmb1 d3sjua\_ d3ojfa1 d1xu9a1 d2jjya1 d1n7ha\_ d1y1pa1  
d1h5qa\_ d1jtvva\_ d4fs3a\_ d2bkaa1 d1gy8a\_ d2c5aa1 d1ulsa\_ d1ooea\_  
d2b69a1 d1y5ma1 d1spxa\_ d1ae1a\_ d1bxka\_ d1ydea1 d1gega\_ d1hdoa\_  
d1o5ia\_ d1e6ua\_ d1snya1 d2rhca\_ d3zv4a\_ d5ceja\_ d2d1ya1 d1fjha\_  
d3w8ea\_ d2fmua1 d1x1ta\_ d1rpna\_ d3ay7a1 d1k2wa\_ d1eq2a\_ d2hrba1

d3ruaa\_ d2ew8a1 d4hwka\_ d1xgka\_ d2bd0a1 d1yo6a1 d2a35a1 d2ntva\_  
d1vl8a\_ d1hdca\_ d4bkua\_ d2ag5a1 d2q45a\_ d1nffa\_ d4iy1a\_ d1zbqa1  
d1kewa\_ d1ek6a\_ d1ja9a\_ d2q46a2 d1iy8a\_ d1cyda\_ d2ptga\_ d1hxha\_  
d1uzma1 d3lyla\_ d4m89a\_ d3wyea\_ d2b11a1 d1w6ua\_ d1sb8a\_ d2q2va\_  
d4nr0a\_ d1e6wa\_ d2gasa\_ d3oiga1 d2bgka1 d1mxha\_ d1vl0a1 d1rkxa\_  
d1r6da\_ d1wmaa1 d1e7wa\_ d2c07a1 d1xkqa\_ d3tzha\_ d1g0oa\_ d3lz6a\_  
d1qyca\_ d1edoa\_ d1gz6a\_ d1oc2a\_ d1t2aa\_ d1zema1 d2xoxa\_ d1z45a2  
d1geea\_ d1p33a\_ d3lt0a\_ d4e6pa\_ d2wyua\_ d1db3a\_ d4q9na\_ d1xhla\_  
d4o1ma\_ d1fmca\_ d2uvda\_ d2gdza1 d1uaya\_ d2z1ma\_ d2o23a2 d2fr1a2  
d2fr1a1 d1qsga\_ d1qyda\_ d4zjua\_ d2a4ka1 d1yb1a\_ d1wvga1 d1yxma1  
d3f4ba\_ d1mg5a\_ d1xg5a1 d2gfoa1 d1vjva\_ d2ayna1 d3nhea\_ d4ekfa\_  
d2ckga\_ d1th0a\_ d2bkra\_ d1cmxa\_ d1xd3a\_ d3ifwa\_ d1e2ta\_ d4c5pa\_  
d2bsza1 d4bgfa\_ d1w4ta1 d1mdwa\_ d1qxp4 d1ziva1 d1zcm1 d3ioqa\_  
d1fh0a\_ d1o0ea\_ d1khqa\_ d1m6da\_ d2cb5a\_ d1cs8a\_ g8pch.1 d1s4va\_  
d2pnsa\_ d1vsna1 d1mira\_ d1iwda\_ d2oula\_ d7pcka\_ d3bwka\_ d3bcna\_  
d2p86a\_ d1pvja\_ d1pcia\_ d1gece\_ d1deua\_ d4bs6a\_ d1xkga1 d1cqda\_  
d1jqpa2 d2c0ya\_ d2bdza\_ d3p5ua\_ d1zoya1 d1qo8a2 d1d4ca2 d1chua2  
d1jnra2 d1kf6a2 d2jk6a2 d2jk6a1 d1fec1 d1fec2 d1lpfa1 d1lpfa2  
d1xhca1 d1xhca2 d1dx1a2 d1dx1a1 d1gera2 d1m6ia2 d1onfa1 d1onfa2  
d3lada2 d3lada1 d1w4xa1 d1w4xa2 d1gesa2 d1mo9a1 d1xdia1 d1fl2a2  
d1fl2a1 d1fcda1 d1fcda2 d1h6va2 d1h6va1 d1mo9a2 d1gv4a2 d1gv4a1  
d2gv8a2 d2gv8a1 d1aoga1 d1aoga2 d1hyua1 d1ebda1 d1ebda2 d3dk9a1  
d1q1ra2 d1q1ra1 d1gesa1 d1w5qa\_ d2c1ha\_ d1ohla\_ d1l6sa\_ d1zbfa1  
d2z1ha\_ d2etja1 d3qioa1 d1j11a\_ d2e41a\_ d1j12a\_ d2l1sna1 d1lio2a\_  
d1uaxa\_ d2yv0x\_ d1mu2a1 d1lekea\_ d1i39a\_ d1pn0a1 d1reo1 d1ju2a1  
d2f5va1 d3c96a1 d2gmha1 d1pj5a2 d1gpea1 d1o5wa1 d1n4wa1 d1k0ia1  
d2dw4a2 d2ivda1 d1seza1 d2voua1 d1kdga1 d1s5ja1 d2hbja2 d2igia\_  
d1wlja\_ d1qhta1 d4dlea1 d1tgoa1 d2f96a1 d3tr8a1 d3mxma\_ d1q8ia1  
d1y97a1 d1w0ha\_ d2py5a1 d1noya\_ d1d5aa1 d1yt3a3 d2guia\_ d3mwpa1  
d4kb1a\_ d1offa\_ d1frra\_ d3wcqa\_ d1e9ma\_ d1l5pa\_ d1wria\_ d1i7ha\_  
d3av8a\_ d1czpa\_ d1rfka\_ d3p1ma1 d3b2ga\_ d2bt6a2 d2av4a1 d3nvva1  
d1krha3 d2h88b1 d1n62a2 d1t3qa2 d1kf6b2 d1zoyb1 d1ffva2 d1dgja2  
d1rm6c2 d1r7ha\_ d1faaa\_ d1wika1 d1xfla\_ d1ttza1 d2f51a1 d1ti3a\_  
d1nhoa\_ d1sena\_ d2i4aa\_ d1ep7a\_ d1zmaa1 d1fo5a\_ d3lefa1 d3diea1  
d2yana1 d1z6na1 d1oaza\_ d3zywa1 d4aj8a\_ d1nm3a1 d4fiwa\_ d1wmja\_  
d4hs1a1 d1liloa\_ d1xwaa1 d1wjka1 d2vmla\_ d1fb6a\_ d1gh2a\_ d1h75a\_  
d1nw2a\_ d1kx5b\_ d3a6na\_ d4m6ba2 d2nqbd\_ d3wkjd\_ d2yfwe\_ d4h9na\_  
d5bnxa\_ d1kx5c\_ d3r45a\_ d1eqzb\_ d4jjnb\_ d1f66c\_ d1eqza\_ d4wnnb\_  
d1kx5a\_ d1u35c1 d1id3a\_ d2nqbc\_ d1kx5d\_ d1ku5a\_ d1f1ea\_ d1b67a\_  
d1tafa\_ d1bh9b\_ d1jfib\_ d1q9ca\_ d1h3ob\_ d2byka1 d1n1ja\_ d4g92b\_  
d1bh9a\_ d1jfia\_ d1h3oa\_ d2bykb1 d1n1jb\_ d1pd212 d1nhya2 d2a2ra2  
d1k0dd2 d1f2ea2 d1gsua2 d1f3ba2 d2fhea2 d2pvqa1 d1tw9a2 d1oyja2  
d1e6ba2 d3ik7a1 d4is0a1 d1r5aa2 d1jlva2 d1m0ua2 d3gtub2 d1z9ha2  
d1okta2 d1axda2 d2gsra2 d1tu7a2 d1k3ya2 d1zgma1 d1b48a2 d1gnwa2



d1gwca2 d2gsta2 d1glqa2 d1oe8a2 d1pn9a2 d1v2aa2 d1fw1a2 d1duga2  
d1g7ea\_ d1ig8a1 d1czan2 d1czan3 d1czan1 d1ig8a2 d1czan4 d1bg3a4  
d1bg3a2 d1bg3a1 g1f8v.1 d1novc\_ d2bbvc\_ d4ilya\_ d1chka\_ d4olta\_  
d1qqya\_ d1f6ra\_ d1livma\_ d2gv0a\_ d1iiza\_ d2z2fa\_ d1j8xa\_ d1gh1a\_  
d1b9oa\_ d1741a\_ d1691a\_ d2o4wa\_ d1p37a\_ d1k28a3 d1xjta1 d1jtma\_  
d2f2qa\_ d4e97a1 d3w3ea\_ d4tx7a\_ d3cq1a\_ d4msta\_ d3iwra\_ d2z37a\_  
d4dyga\_ d1mpya2 d1kw3b2 d1kw3b1 d4ghga1 d1tfza1 d3isqa1 d3isqa2  
d1sqia1 d1sqia2 d1lkda2 d1lkda1 d1mpya1 d1cjxa2 d1cjxa1 d1sp9b2  
d1t47a1 d1t47a2 d1sp8a1 d1sp8a2 d1flua1 d1f74a\_ d3l21a\_ d2e1da\_  
d1to3a1 d1w3ia\_ d1sfla\_ d1vcva1 d4imea\_ d1wa3a\_ d2ocza1 d1f2ja\_  
d3m16a\_ d2yxga\_ d1ub3a\_ d3a5fa\_ d1fbaa\_ d1l6wa\_ d1xfba1 d1wx0a1  
d1vpxa1 d1ojxa\_ d1mxsa\_ d2a4aa1 d1xkya1 d3cq0a1 d3s1xa\_ d1f05a\_  
d1fdja\_ d3cp1a1 d4d2ja\_ d1s5ja2 d1qhta2 d4dlea2 d1tgoa2 d3py8a2  
d1q8ia2 d1kfsa2 d2py5a2 d1d5aa2 d1qsta\_ d2beia1 d4m3sa\_ d1u6ma1  
d1ygha\_ d1yk3a1 d3dr6a\_ d1xmta\_ d1z4ea1 d2ge3a1 d1bo4a\_ d2fiaa1  
d2jdca1 d1y9wa1 d3to7a\_ d1wwza1 d2fl4a1 d2ozua1 d2b5ga\_ d2cy2a1  
d2p0wa\_ d1cm0a\_ d4pswa\_ d1yrea1 d1yr0a1 d1m4ia\_ d2gana1 d1yvka1  
d1ghea\_ d2g3aa1 d1y7ra1 d2euia1 d1q2ya\_ d2fsra1 d1xeba\_ d2ae6a1  
d1cjwa\_ d1qsma\_ d2aj6a1 d1y9ka1 d1i12a\_ d1vkca\_ d2atra1 d1n71a\_  
d2d4pa1 d2fiwa1 d2fe7a1 d1tiqa1 d2ou2a\_ d1yx0a1 d2fcka1 d1p0ha\_  
d2j8ma\_ d2pq8a\_ d1z4ra1 d1s3za1 d1ufha\_ d1gvfa\_ d3qm3a1 d2fjka\_  
d1f37b\_ d1xvqa1 d1pn0a2 d3hy2a\_ d2cvba1 d1lu4a\_ d1we0a1 d2bmx1  
d2a4va1 d1psqa\_ d1xiya1 d1q98a\_ d1n8ja\_ d1zofa1 d2ggta\_ d3tjja\_  
d4jela1 d1o73a\_ d3s9fa\_ d2zcta\_ d1qmva\_ d1jfua\_ d2b1ka\_ d5dvba1  
d2b5xa1 d2v2ga\_ d1st9a\_ d3tb2a\_ d4llra\_ d4fh8a1 d1e2ya\_ d1knga\_  
d2h30a\_ d1i5ga\_ d2z9sa\_ d2f8aa1 d1tp9a1 d2b7ka\_ d1nm3a2 d3hvva\_  
d2wfc1a1 d4kcea\_ d1xvwa1 d4gqca1 d3qpma\_ d4k1fa\_ d1zzoa1 d1gpl1a\_  
d1prxa\_ d4od7a1 d1z6ma1 d4mcua1 d4dvca1 d3l9sa\_ d1un2a\_ d3rppa\_  
d1zsqa1 d1rmka\_ d1ixta\_ d1eyoa\_ d1fu3a\_ d1g1pa\_ d1f3ka\_ d1fyga\_  
d2ph1a2 d2ph1a1 d1fxza2 d1fxza1 d1lrha\_ d1uija1 g1dgw.1 d2v09a\_  
d1uika2 d1uika1 d1dgwa\_ d1l6ja5 d1l6ja4 d1eaka4 d1eaka3 d1l6ja3  
d1h8pa2 d1h8pa1 d1w52x1 d2ppl1a1 d1hpl1a2 d1lpbb2 d2oxea1 d1bu8a2  
d1rpl1a2 d1ra6a\_ d3gsza\_ d1khva\_ d1te9a\_ d2xwha\_ d3uqsa\_ d3hkwa\_  
d3n6ma\_ d2cjqa\_ d2xyma\_ d1teba\_ d1te8a\_ d1s48a\_ d1u09a1 d4wfxa\_  
d3tyqa\_ d2pgga1 d2h1ia1 d2r8ba1 d3b5ea1 d3cn9a\_ d1auoa\_ d2hqya1  
d2hqya2 d1lrza2 d1ne9a1 d1ne9a2 d1svpa\_ d3su6a1 d1cu1a1 d4agka\_  
d1vcpa\_ d1q31a\_ g1n11.1 d3e90b\_ d1ep5a\_ d3u1jb\_ d3zxha\_ d1cgl1a\_  
d1rm8a\_ d1eaka2 d1hy7a\_ d2jsda\_ d1cxva\_ d1hv5a\_ d1leb6a\_ d4dv8a2  
d1dzka\_ d4tlja\_ d2a2ua\_ d4wfva\_ d3t1da\_ d4i1axa\_ d3zq3a\_ d2nnda\_  
d1i4ua\_ d1kxoa\_ d1bbpa\_ d1kt7a\_ d1lexsa\_ d3s26a1 d1lf7a\_ d1qfta\_  
d4gh7a\_ d1z24a1 d1qabe\_ d1xkia\_ d3bx7a\_ d4i1awa1 d1n0sa\_ d1gkab\_  
d3kzaa\_ d2k23a\_ d2l9ca1 d2joza1 d1gm6a\_ d3kffa\_ d3saoa1 d1e5pa\_  
d1yupa1 d1iiua\_ d2tbvc\_ d1c8nc\_ d1x36a\_ d1smvc\_ d1ng0c\_ d4sbvc\_  
d1lopa\_ d1f2nc\_ d1cixa\_ d1y29a\_ d1v7fa\_ d2jtba\_ d1d1ha\_ d1g9pa\_

d1lupa\_ d1qk7a\_ d1mb6a\_ d2a2va\_ d1niya\_ d1i25a\_ d1hvwa\_ d2mpqa\_  
d1ie6a\_ d1kqha\_ d1la4a\_ d2mxoa1 d1koza\_ d1qk6a\_ d1emxa\_ d1lqra\_  
d1c6wa\_ d1js9c\_ d1za7a\_ d1laja\_ d3lgia\_ d3i77a\_ d2z9ia2 d4nsva\_  
d1lcya2 d4jcna\_ d1agja\_ d1os8a\_ d1hpga\_ d1p3ca\_ d1l1ja\_ d1qtfa\_  
d1ny721 d1ny722 d1a6ca3 d1a6ca2 d1pgl22 d1pgl21 d1pgl11 d1ny711  
d1mqta\_ d1d4m3\_ d1fmd3\_ d2mev1\_ glaym.1 d1ev13\_ d4q4w1\_ d1r1a3\_  
d2x5ia\_ d1rhi1\_ glr1a.1 gl1d4m.1 glrhi.1 d1b35b\_ d1loopa\_ d1tme1\_  
d4iv1a\_ glpvc.1 glfpn.1 d1fpn1\_ d4gb31\_ d1d4m1\_ d1fmd1\_ d1ev11\_  
d2wzr3\_ glcov.1 d1qqp3\_ glfmd.1 d2x5ic\_ d1rhi3\_ gloop.1 d1hxs1\_  
glhxs.1 d1fpn3\_ d1bev1\_ g2mev.1 d1eah3\_ d1aym1\_ d1pvc3\_ d1zba3\_  
d1h8ta\_ d3vbhc\_ glb35.1 glbev.1 d1hxs3\_ gl1ev1.1 d1bev3\_ gltmf.1  
d1tmf1\_ d1b35a\_ d2mev3\_ gl1eah.1 glh8t.1 d1eah1\_ d4q4w3\_ d1r1a1\_  
d1aym3\_ d1pvc1\_ d1zba1\_ d1h8tc\_ d1loopc\_ d1tme3\_ glqqp.1 d4iv1c\_  
gl1tme.1 d1y14b1 d2nn6i1 d1i94l\_ d2zjra2 d1smxa\_ d2qamc2 d1hh2p1  
d2r7da1 d1r12a2 d1wfaq1 d3bzka4 d1x6oa2 d3a0ja\_ d2j01d2 d2ja9a1  
d4q15a\_ d1hr0w\_ d1luza\_ d2n3sa\_ d2vnud1 d1h95a\_ d1go3e1 d2nn6h1  
d2mola\_ d1iz6a2 d1jjga\_ d1e3pa2 d2ix0a3 d2ix0a2 d2lxja\_ d1ueba3  
d1ueba2 d2z0sa1 d1u0la1 d2ix0a1 d2eifa2 d2je6i1 d3i2za1 d2c35b1  
d2ahob2 d1t9ha1 d3i4oa\_ d2qall1 d1jt8a\_ d2nn6g1 d1g6pa\_ d3cama\_  
d1i94q\_ d1c9oa\_ d1d7qa\_ d2ba0a1 d2vnud2 d2vnud3 d1khia2 d2qalq1  
d1wi5a1 d1xtda2 d1ny4a\_ d1eixa\_ d3exra\_ d2ffca1 d2fdsa1 d3n3ma1  
d2czda\_ d1q6oa\_ d2yyua\_ d1vqta1 d1dbta\_ d3ldva1 d3syxa1 d1mkea1  
d2p8va\_ d1xoda1 d1i7aa\_ d1evha\_ d1legxa\_ d1ux8a\_ d1dlya\_ d4i0va\_  
d2bkma\_ d1dlwa\_ d2bmma\_ d2r80b\_ d1cqxa1 d1cg5a\_ d1gcvb\_ d3boma\_  
d2h8fb\_ d2raoa\_ d3bj1a\_ d4hrrb\_ d2r50a\_ d3d1kb\_ d2aa1b1 d3zhwa\_  
d3hf4b\_ d3gdja\_ d1jebb\_ d3bj1b\_ d1x9fb\_ d1wmub\_ d1gcva\_ d3bcqb\_  
d3d4xb\_ d1gvha1 d2dc3a\_ d3hf4a\_ d4yu3a\_ d3k8ba\_ d1qpwb\_ d2r80a\_  
d3bcqa\_ d1v4wa\_ d3wtgb\_ d1j17a\_ d4esaa\_ d1a9we\_ d3d1ab\_ d1fsla\_  
d4h21a\_ d1v4wb\_ d1mwca\_ d1vhba\_ d1jeba\_ d1spgb\_ d1h97a\_ d1q1fa\_  
d1tu9a1 d3d1aa\_ d1hdsb\_ d3hyub\_ d2zfb\_ d3fs4a\_ d1oj6a\_ d1shrb\_  
d4h21b\_ d4yu3b\_ d1spga\_ d3hrwa\_ d3qqra\_ d3at5a\_ d4wchd\_ d3hyua\_  
d1cg5b\_ d1uc3a\_ d1hbra\_ d2raob\_ d1outb\_ d4esab\_ d3gdjb\_ d3qqqa\_  
d1x9fc\_ d3vrfa\_ d1litha\_ d3mkba\_ d3d4xa\_ d3mjpa\_ d1j16a\_ d3fh9a\_  
d1outa\_ d2dc3b\_ d1lit2a\_ d3eoka\_ d3g46a\_ d1qpwa\_ d3vrfb\_ d1ch4a\_  
d1x9fd\_ d1hdsa\_ d2zfb\_ d3mkbb\_ d1or4a\_ d3wtga\_ d1a4fa\_ d3fh9b\_  
d3bomb\_ d3cy5a\_ d3at5b\_ d1x9fa\_ d2oifa\_ d4lmb\_ d1cpcb\_ d3v57a\_  
d1kn1a\_ d1cpca\_ d4f0ta\_ d2vjha\_ d4po5b\_ d1eyxa\_ d1alla\_ d4f0tb\_  
d1b33b\_ d4h0mb\_ d1b33a\_ d2vjhb\_ d4lmb\_ d2vmlb\_ d1allb\_ d2vjta\_  
d3dbja\_ d2vmla\_ d2vjtb\_ d4f0ub\_ d1f99b\_ d4rmpa1 d1liaa\_ d1eyxb\_  
d2uulb\_ d4lmsb\_ d4f0ua\_ d2bv8a\_ d1f99a\_ d2bv8b\_ d2c71b\_ d3dbjb\_  
d4rmpb1 d1b8da\_ d4h0ma\_ d3v57b\_ d1kn1b\_ d1liab\_ d2uula\_ d2j96a\_  
d2qked\_ d4ksoa\_ d1t4za1 d1wwja\_ d3ia2a\_ d1a88a\_ d4dgqa1 d1zoia\_  
glgxs.1 gl1wh.1 d2xqfa\_ d1ea5a\_ d1f6wa\_ d1qe3a\_ d1k4ya\_ d4qwwa\_  
d2ha2a\_ d1r88a\_ d1sfra\_ d4qeka\_ d1gl9b1 d1gkub2 d1jmx4 d1pbya3

d1pbya4 d4iuua3 d4bvva\_ d5hpga\_ d3k65a\_ d1ki0a3 d1ki0a2 d1ki0a1  
d1a0ha1 d1pmla\_ d3sp8a3 d2feba1 d1xova2 d2m5ta\_ d1cqqa\_ d1wqsa\_  
d5bpea\_ d2ipha\_ d1lvoa\_ d2bhga1 d3tnta\_ d3sjia\_ d3d23a1 d2fyqa\_  
d3tloa\_ d3zvea1 d2hrva\_ d3q3ya1 d4asha1 d1g8fa3 d3rp2a\_ glucy.1  
d1fuja\_ d2zchp\_ d3w94a\_ d1si5h\_ d1lo6a\_ g2pka.1 d1cgha\_ d1kigh\_  
d1a5ia\_ d3s9ba\_ d1hj8a\_ d1ao5a\_ d2anya\_ d1q3xa1 d1gvza\_ d1azza\_  
d4gsoa\_ d2f91a1 d1liaua\_ d1gdna\_ d1eufa\_ g1fiw.1 d1eq9a\_ d4nfea\_  
d2rdla\_ d1spja\_ d1elva1 d1a7sa\_ d1lekbb\_ d1pfxc\_ d1yc0a\_ d2aiqa\_  
g1fiz.1 d1fi8a\_ d4k60a\_ d4dgja\_ d1mzaa\_ d1op0a\_ d3tjva\_ d1pytd\_  
d1sgfg\_ g1gg6.1 d2eeka\_ g1rtf.1 d1a0ja\_ d3g01a\_ d1pytc\_ d4e7na\_  
d1ddja\_ d1z8ga1 d2hlca\_ d1npma\_ d1brup\_ g1jou.1 d1sgfa\_ d1autc\_  
g2hnt.1 g1kdq.1 d1orfa\_ d3s69a\_ d4crga\_ d1fxya\_ d1bqya\_ d2ftba\_  
d1pmpa\_ d2rcqa1 d1fdqa\_ d4lkpa\_ d1sa8a\_ d1vyfa\_ d1lpja\_ d3vg7a1  
d4azqa1 d1o8va\_ d5bvqa\_ d1p6pa\_ d2qo4a\_ d1opba\_ d1yiva1 d1o1va\_  
d4bvma1 d4tkba\_ d4i3ba\_ d1bwya\_ d1ggl\_a\_ d4gkca\_ d1cbia\_ d3p6da1  
d1kqwa\_ d2a0aa1 d2bk7a\_ d3fjua\_ d1z5ra1 d1kwma1 d1uwy2 d1jqga1  
d2c1ca1 d1dtda\_ d1h8la2 d1e69a\_ d1mv5a\_ d3g60a4 glii8.1 d1ewqa2  
d1ji0a\_ d1qhla\_ d1v43a3 d2wmfa1 d1vpla\_ d1g2912 d4a82a2 g1f2t.1  
d2d62a1 d3tuic1 d2bbsa1 d3g60a3 d2ixea\_ d1g6ha\_ d1sgwa1 d2qi9c\_  
d3rlfa1 d3b60a1 d3d31a2 d2pzea1 g1xew.1 d1jj7a\_ d1oxxk2 d2onka1  
d1wlwa\_ d1iwea\_ d1qf5a\_ d1vmaa2 d1nija1 d1np6a\_ d2p67a1 d3ihla\_  
d1okkd2 d1lsla2 d1slma2 d1liona\_ d2v40a\_ d3hida\_ d2vola1 d2g0ta1  
d1vcoa2 d1j8mf2 d1g3qa\_ d1xjca\_ d1p9ba\_ d1qzxa3 d1ihua2 d1ihua1  
d2qm8a\_ d1dj2a\_ d4ioja\_ d1cp2a\_ d1yrba2 d1hyqa\_ d3gqba2 d1skye3  
d1xp8a1 d1tf7a2 d1tf7a1 d1ye8a1 d1skyb3 d2qe7d2 d4blta\_ d4huta\_  
d3l1daa2 d4hyya\_ d2i3ba1 d1crla\_ d3j9tb2 d3ntua2 d1vdza1 d2z43a\_  
d1e9ra\_ d1nlfa\_ d3ziaa2 d1n0wa\_ d1g6oa\_ d3ziad2 d3j9ta2 d1pzna2  
d3gqbb2 d2i49a\_ d1nnfa\_ d1xvxa\_ d1lursa\_ d1h3da1 d1iuda\_ d4mlva1  
d1twya\_ d3e13x\_ d2nxoa1 d4pfua\_ d3ttma\_ d1elja\_ d2qmwa1 d1us5a\_  
d1y3na1 d1jeta\_ d1uqwa\_ d4f19a1 d2esna2 d3thia\_ d3fasa1 d2uyeb\_  
d2xwva1 d1r9la\_ d2fyia1 d1pb7a\_ d2ozza1 d1sw5a\_ d1nh8a1 d1vr5a1  
d2g29a\_ d1xs5a\_ d3lswa\_ d2z23a\_ d3w9va\_ d3tcha\_ d1q35a\_ d1z7me1  
d3q27a\_ d1p99a\_ d1ve4a1 d2i6ea1 d4mcoa1 d4n8ya\_ d1eu8a\_ d1z3ma1  
d1hsla\_ d1lixca2 d1j1na\_ d1xvya\_ d1y9ua\_ d2z22a1 d1xoca1 d4oera\_  
d1wdna\_ d5f1qa1 d1xt8a1 d1i6aa\_ d4gwoa\_ d4igta1 d1pc3a\_ d4mmpa1  
d1o63a\_ d2czla1 d2onsa2 d4mija1 d1eh3a\_ d3skpa\_ d1dtza1 d1dtza2  
d1lieja\_ d1jnfa2 d1ce2a1 d1jnfa1 d1b1xa2 d1b1xa1 d1jw1a1 d1jw1a2  
d1ryoa\_ d1h76a1 d1h76a2 d1c4oa1 d2p6ra3 d2p6ra4 d1oywa2 d1oywa3  
d1wrba1 d1w36b2 d1w36b1 d1c4oa2 d3bora\_ d1t6na\_ d2eyqa5 d2eyqa3  
d2eyqa2 d2zu6a2 d1veca\_ d1uaaa1 d1w36d1 d2g9na1 d1z3ix2 d2rb4a\_  
d1hv8a1 d1hv8a2 d1t5ia\_ d1w36c2 d2j0sa2 d2j0sa1 d1fuka\_ d3hjha1  
d1z5za1 d1qdea\_ d1z63a1 d1s2ma2 d1s2ma1 d1wp9a1 d1wp9a2 d1gm5a3  
d1gm5a4 d3dina4 d3dina3 d1q0ua\_ d1w36c1 d1z3ix1 d1nkta3 d1nkta4  
d1uaaa2 d1w36d2 g1qhh.1 d2fwra2 d2fwra1 d3q3ma\_ d1za0a1 d1mxra\_

d2inca\_ d1jk0a\_ d2incb\_ d1mhyb\_ d3hf1b\_ d1mtyb\_ d1r2fa\_ d2uw1a\_  
d1mhyd\_ d3n37a\_ d1oquc\_ d1syya\_ d1mtyd\_ d2o1za\_ d1uzra\_ d1smsa\_  
d2fkza\_ d1zujal d1s3qa1 d2fjca1 d1z6om1 d1veia\_ d4dyya\_ d1jiga\_  
d3gvya\_ d2pyba\_ d4cy9a1 d3bvfa1 d1r03a\_ d2cf7a\_ d1nf4a\_ d1zs3a1  
d4iwka\_ d3ka8a\_ d3np0x\_ d1n1qa\_ d11b3a\_ d4e6ka\_ d1z6oa1 d2fzfa1  
d4dyua\_ d3ge4a\_ d1jgca\_ d4am4a\_ d2z6ma\_ d1ji5a\_ d1vlga\_ d1lkoa1  
d3qz3a\_ d1o9ra\_ d2ffxj\_ d1euma\_ d1yv1a1 d2v2pa\_ d1j30a\_ d4di0a\_  
d1dpsa\_ d1oewa\_ d2qzxa\_ d2asia\_ d1psoe\_ d1miqa\_ d1smra\_ d2h6ta\_  
d1pfza\_ d1lizda\_ d3hd8a\_ d1j71a\_ d1dpja\_ d4aa9a\_ d1t6ex\_ g1b5f.1  
g1lya.1 g1htr.1 d1bxoa\_ d1wkra\_ d1tzsa\_ d1libqa\_ d2qzwa\_ d1ex4a2  
d1c6va\_ d1h4ra3 d4y18a1 d2a16a3 d1wgda1 d1wggal d4q5eb\_ d1wjna1  
d1se9a\_ d3n3kb\_ d1wz0a1 d1we6a1 d2m0xa\_ d2gbka\_ d3rt3b1 d1wh3a1  
d1sifa\_ d2ekec2 d4ii2b1 d4hk2a1 d1c3ta\_ d1m94a\_ d1wgha1 d1ttna1  
d1j8ca\_ d1wx8a1 d3v6cb1 d2ma9b\_ d4i61b1 d1bt0a\_ d2jvca1 d1iyfa\_  
d2k1fa\_ d1wxva1 d1wf9a1 d1t0ya\_ d2io0b2 d1x1ma1 d2gbma\_ d1zw7a1  
d2m17a\_ d1ud7a\_ d1we7a1 d2lwp\_ d2gbja\_ d1wjua1 d1v6ea1 d1v86a1  
d4eewa\_ d1wiaa1 d4icva\_ d4gu2a\_ d1wx7a1 d1wy8a1 d4hjka1 d2faza1  
d1v5oa1 d3ubra\_ d1d4ca1 d2k3va\_ d1ft5a\_ d1qdba\_ d1m1qa\_ d2j7aa\_  
d1h21a\_ d1ogyb\_ d4fasa\_ d1jnia\_ d1oaha\_ d1sp3a\_ d3h33a\_ d1rwja\_  
d19hca\_ d1os6a\_ d3bxua\_ d3h4na\_ d1i77a\_ d3caoa\_ d1j0pa\_ d2ctha\_  
d1duwa\_ d1ofwa\_ d2e84a\_ d1gyoa\_ d3h34a\_ d1iyka2 d1rxta1 d1iica2  
d1iica1 d1wioa4 d1ccza2 d1vcaa1 d1dr9a2 d1ic1a1 d2d9qb1 d2nxyb2  
d1um8a\_ d1qvra2 d1qvra3 d1qzma\_ d1sxjc2 d1jr3d2 d2p65a\_ d1l8qa2  
d1g8pa\_ d3hu3a3 d1sxjd2 d1njfa\_ d1in4a2 d1sxja2 d1tuea1 d2ce7a2  
d1w5sa2 d1sxjb2 d1d2na\_ d1ny5a2 d1ofha\_ d2gnoa2 d2a5yb3 d1fnna2  
d1u0ja1 d1lv7a\_ d1iqpa2 d2fnaa2 d1ixsb2 d4gita\_ d1sxje2 d1g41a\_  
d2e3fa\_ d1mm0a\_ d2e3ea\_ d21lda\_ d2ny8x\_ d2e3ga\_ d2ny9x\_ d2nz3a\_  
d21j7a\_ d1n4na\_ d2m8bb1 d2kyqa\_ d3psma\_ d1jkza\_ d1jxca\_ d2g11a\_  
d1ugla\_ d4uj0a\_ d2k4ua\_ d1hp2a\_ d2lu9a\_ d1baha\_ d2meoa1 d1wm7a\_  
d1hlya\_ d1n8ma\_ d1jlza\_ d1wpda\_ d1pvza\_ d1wt7a\_ d1rjia\_ d1wz5a\_  
d1m2sa\_ d1pjva\_ d1c49a\_ d1qkya\_ d2ktca1 d1wmta\_ d1du9a\_ d1j5ja\_  
d1r1ga\_ d1t0za\_ d2i61a\_ d1t1ta\_ d1sn4a\_ d1kv0a\_ d2lkba\_ d1npia\_  
d1wwna\_ d1pe4a\_ d2kbka\_ d2li7a\_ d1djta\_ d2kbha\_ d1sega\_ d1omya\_  
d1zywa1 d1jzaa\_ d1iyjb4 d1iyjb5 d1iyjb3 d1o7ia\_ d4ipca1 d1x3ea\_  
d4apva\_ d1jb7a1 d1jb7a2 d1jb7a3 d3kdfa\_ d1ue1b\_ d1wjja1 d3eiva\_  
d1xjva2 d1xjva1 d2ccza2 d1se8a\_ d1lloc\_ d1jb7b\_ d1qvca\_ d3ulla\_  
d1qzga\_ d1mua4 d1mua5 d1mua3 d3g48a1 d1gd7a\_ d1mkha\_ d1jjcb3  
d1pyba\_ d3ubub\_ d1legia\_ d1qo3c\_ d1v7pa\_ d1tdqb\_ d3ubua\_ d1c3ab\_  
d1h8ua\_ d3bx4b\_ d1t8ca1 d1sb2a1 d1qdda\_ d2ziba1 d3cada\_ d1byfa\_  
d1j34b\_ d1jwia\_ d1jzna\_ d1c3aa\_ d1oz7b\_ d1wmza\_ d3bdwb\_ d1hq8a\_  
d1fifa1 d1dv8a\_ d3hupa\_ d1wk1a1 d1umra\_ d2afpa\_ d3bx4a\_ d1gz2a\_  
d1sl6a\_ d1v7pb\_ d3g8ka\_ d1ixxa\_ d1j34a\_ d1jwib\_ d1g1sa1 d1y17a1  
d1ja3a\_ d1fvub\_ d3bdwa\_ d1sb2b1 d1fvua\_ d1oz7a\_ d4m17a\_ d3cfwa1  
d1ypqa1 d1gl1ta1 d3fd4a\_ d3l9jc\_ d4dn8a1 d1v41b\_ d1rdl1\_ d2msba\_

d1xwdc1 d3kj4a\_ d1ozna\_ d1w8aa\_ d2ifga3 d1xkua\_ d1rpma\_ d2shpa1  
d1yfoa\_ d1l8ka\_ d2ooqa1 d1g4us2 d1lara2 d1lara1 d1wcha\_ d2fh7a2  
d2fh7a1 d1ohea1 d1ohea2 d2f4da\_ d1rxda\_ d2hxpa\_ d1xria\_ d1d5ra2  
d1fpza\_ d3ezza\_ d4y2ea\_ d1i9sa\_ d1c1la\_ d4lbqa\_ d1a78a\_ d1slta\_  
d4no4a\_ d3zsja\_ d3duia\_ d1g86a\_ d1qmja\_ d1hlca\_ d1tdha3 d1q3ba3  
d1ee8a3 g1qmo.1 g1len.1 d3zyra\_ d1fnya\_ d1n47a\_ g2ltn.1 d1avba\_  
d3usua\_ d1dhkb\_ d1f9ka\_ d1lukga\_ d1g8wa\_ d1g9fa\_ d1wbfa\_ d3wcsa\_  
d1g7ya\_ g1loe.1 d1mvqa\_ d1hq1a\_ d1v6ia\_ d1dbna\_ d1qnwa\_ d1fx5a\_  
d4l8qa\_ d1ioaa\_ d3n35a\_ d1eysc\_ d2h0ba\_ d2erfa\_ d1h30a2 d1h30a1  
d3mw4a1 d1pz7a\_ d2r1ba\_ d3v64a1 d1d2sa\_ d3bopa1 d3mw3a1 d1okqa1  
d1okqa2 d1dszb\_ d1a6ya\_ d3cbba\_ d1ynwa1 d1r4ia\_ d1hcqa\_ d2hana\_  
d2hanb\_ d2enval d1kb4b\_ d2n1lb\_ d1lola\_ d1adqa1 d1fnga1 d1uvqb1  
d1zs8a1 d2vola1 d2vola2 d1mfbl2 d2jelh2 d1uwel2 d3qq4b1 d1kjob\_  
d1k5na1 d1osph2 d4odh12 d1ow0a1 d1ow0a2 d1bfob2 d3l9ra2 d3jttt1  
d2fath2 d4elkb2 d1fn4b2 d2xfxb\_ d1pg7x2 d1cqka\_ d4k71b2 d1lk2a1  
d1eapb2 d4lfhg2 d1i4fa1 d2nw2a2 d1kfah2 d1mhca1 d1h3ua1 d1wejh2  
d1h0db2 d1a5fh2 d1kcvh2 d1mjuh2 d1qqda1 d1kcrh2 d1k8ia1 d3huja2  
d2nnab1 d1nfd2 d3mffb2 d1s9va1 d1lk3h2 d1q0x12 d1fv1b1 d1nezal  
d4rfeb2 d1r3ha1 d1a6tb2 d1kjva1 d1pz5b2 d1onqa1 d2bc4a2 d1de4a1  
d1k8da1 d1tcra2 d1dn0b2 d1nfde2 d2xwtb2 d1bfoa2 d1mexh2 d1iakb1  
d1ypzf2 d4f7ea2 d1q7212 d2fbjh2 d1fe8h2 d1clzh2 d1fngb1 d1uvqa1  
d1vgka1 d1c16a1 d4j12a2 d4x99b2 d1igtb3 d1je6a1 d1q72h2 d1nldh2  
d1teth2 d2hmic2 d1i1ca2 d1i1ca1 d1k8ib1 d1q0yh2 d1kfa12 d3frua1  
d1pg7w2 d1u58a1 d1igyb4 d1igyb3 d1hyrc1 d1klub1 d1deeb2 d1c12b2  
d2bc4b2 d2ig2h2 d1kcv12 d3wn5b1 d1lk2b\_ d1lk312 d1mjul2 d1sm3h2  
d1q0xh2 d1zvsal d1ydpal d1u8ib2 d1ypze2 d1kcuh2 d1op9a\_ d1y0la1  
d1letzb1 d1egj11 d2gsib1 d1nj9a1 d4jfh1 d1aqk11 d1t2ja\_ d1lo4h1  
d1zvyal d3v4v11 d4enec1 d1kxtb\_ d5e8ea1 d2pxya\_ d4weud\_ d1xiwc\_  
d2esvd1 d1qznh\_ d1ogae1 d1f4xh1 d4n1hb\_ d3ezjb1 d3mlw11 d1kfah1  
d1letza1 d1b4jh1 d3cfic\_ d4w68a\_ d2arja1 d1ek3a\_ d2ok011 d1vera\_  
d1uwgh1 d1blnb1 d1fpth1 d1rzga1 d2giya1 d4m3kb1 d1nc2a1 d2nyyd1  
d1ncna\_ d1fbih1 d5dxwa\_ d4fqqa1 d1dqdh1 d1jfq11 d1kelh1 d1faih1  
d1frgl1 d1figl1 d4m6n11 d1fo0a\_ d4hxb11 d3b5ga\_ d3quyd1 d2h9gb1  
d1i8kb\_ d2dd8h1 d2ck0h1 d1eaja\_ d4w6wb1 d2a6ib3 d1t66d1 d2e27h\_  
d1ob1b1 d1f11b1 d2v7na1 d2xt1b1 d1pskh1 d4i13b1 d2op411 d1a0q11  
d1uwel1 d1za3a1 d1ncb11 d4uu9a\_ d1bm3h1 d1cloh1 d1nqba2 d1cf8h1  
d4y5va\_ d1mhph1 d5anma1 d4cdgc1 d4ldeb\_ d1y01b1 d2pcpb1 d1z3gl1  
d1dfb11 d1fh5h1 d3g5xa1 d1tzib1 d4dn311 d3zhka1 d2b1hh1 d2uyla1  
d1f3dh1 d1nj9b1 d2agjh1 d2h1p11 d1q72h1 d8fabb1 d1ndmb1 d1rjca1  
d4u6hb1 d3upca\_ d2fbj11 d1osph1 d1tvda\_ d2cjh\_ d4fhbd1 d1bd2d1  
d1rz7h1 d3nn8a\_ d1blna1 d1knoa1 d1nfdal d2bmkb1 d1dq11\_ d1igyb1  
d1igfl1 d1e8h1 d3utza1 d1nc2b1 d1rihh1 d4mwfb1 d4jvpa1 d1mieh1  
d1rhfa1 d1fgn11 d1sbsh1 d1lp9e1 d1dn0a1 d4lqf11 d1iaih1 d1kgcd1  
d1mh5b1 d1gpoll d2g60h3 d1f8t11 d2jixd1 d4grwh\_ d1fo0b\_ d1bfob1

d1axsa1 d1u9ka\_ d1nmbh\_ d1h8na1 d1h8na2 d1jguh1 d4eura1 d3sdy11  
d35c8h1 d1w7211 d1mvub\_ d1i9rh1 d1ob1a1 d4wenb\_ d1yeeh1 d3ietc1  
d1f58h1 d1ad0b1 d1mqkl\_ d1nbvh1 d4b50a\_ d3r8bb\_ d1baf11 d1mamh1  
d4rgne1 d2gsgb\_ d35c811 d1bafh1 d1ailh1 d2pcpa1 d2fath1 d2x1pa\_  
d1orsb1 d1ibgl1 d1shma\_ d1a2yb\_ d1u0qa\_ d2coqa\_ d1hilb1 d1qfwi\_  
d1jv5b\_ d1fn4b1 d5e0qa\_ d1nsnh1 d1plgl1 d4ocx11 d1kb5h1 d1rzfh1  
d1pg7x1 d2fx7h1 d2oi9c\_ d1l7il1 d3eyva1 d1d5il1 d4ffyl\_ d1tet11  
d1a6wh\_ d1ac6a\_ d3dvfa\_ d1nfde1 d1mimh1 d1ri8a1 d1jhlh\_ d3dura\_  
d1fskb1 d1f97a1 d3so3b1 d2ak4d1 d1lp9f1 d4z7wf1 d1l7th1 d4y5ya\_  
d4x7ec1 d1emth1 d1ikfl1 d1nlbh1 d4uta11 d1bjma1 d1eapb1 d1u6ah1  
d2dtgd1 d1kj2b\_ d1xeda1 d1c1eh1 d1fgvh\_ d2bnub1 d2fb4h1 d2dtgb1  
d1ktrh\_ d1jpth1 d1qkz11 d4hepg\_ d2atpb1 d1flrh1 d2hrpl1 d1mvfa\_  
d1iaim1 d3k80a1 d2jb5h1 d3zkxc\_ d4grwe\_ d1it9h1 d1rhhb1 d3w9ec\_  
d1e4wh1 d1sy6h1 d2j6eh1 d3qxta\_ d1jglh1 d1p7ka1 d1tzhb1 d4n8pa1  
d1gaf11 d2jelh1 d1wioa2 d4i0cc1 d1cicb1 d1lmka2 d1lmka1 d1iqwh1  
d1orqb1 d1ejoh1 d1jnlh1 d4zg1a\_ d43c9b\_ d1ggbl1 d1wejh1 d3q6fa1  
d1f3dj1 d3c61a1 d1bqlh1 d3p9wb\_ d1a3r11 d1h0db1 d2uzil\_ d1eo811  
d1qfwl\_ d1n7m11 d1igja1 d1c5ch1 d2a9mh\_ d1rmfh1 d1fj1b1 d4heme\_  
d1ccza1 d1a5fh1 d1ogad1 d1dlfh\_ d1qa9b\_ d1vgel1 d3qskb\_ d1sjxa\_  
d4ozfg1 d1sq2n\_ d1qd0a\_ d1kcvh1 d1c5db1 d3qcul1 d8faba1 d3bn9d1  
d1mjuh1 d4y8dc\_ d7fabh1 d3dvgb1 d1l0011 d1a6tb1 d1gigh1 d1kcrh1  
d2hwz11 d1yjdc1 d3clfl1 d4krna\_ d1d171\_ d1e6o11 d1mexh1 d3r0ma\_  
d4kkna\_ d1fnsl1 d1oaqh\_ d1rzia1 d1lucbh1 d1ncwl1 d4b41a\_ d1nfdfl  
d2mpah1 d2d7t11 d4grwf\_ d4b5ea\_ d1l1k3h1 d3u79a\_ d4u3xa\_ d1ghfl1  
d1bvkb\_ d1mcww1 d1b88a\_ d1jrhh1 d32c2b1 d4wemb\_ d1dsfh\_ d1op3h1  
d1cell1 d1iqda1 d1qoka1 d1qoka2 d1qfuh1 d2crya1 d1ay1h1 d1oaql\_  
d3ab0b\_ d1rur11 d1t4kb1 d1bz7b1 d1n0xh1 d1for11 d1lucbl1 d4w6yb\_  
d43c9a\_ d2aabl1 d1tzia1 d4n1ca\_ d1k6qh1 d3g9ab\_ d4tvsal d1lghm\_  
d1pz5b1 d3dx9a1 d3wxwh\_ d1nakh1 d1kcul1 d3eaka\_ d4qlra1 d1cr911  
d1d9ka\_ d1f4x11 d1deea1 d2i27n2 d1c12a1 d2orb11 d1j8hd1 d1mcph1  
d1c5da1 d1kenh1 d1bd2e1 d1h5ba\_ d4x7fc1 d3upaa\_ d1t3fa1 d1indh1  
d2dtgc1 d4hc111 d1zv5a1 d4wgvb\_ d1uwgl1 d4f37k1 d1aqkh1 d1vesa\_  
d3zkqd\_ d1fpt11 d1l0411 d1knob1 d3rrqa\_ d1ct8b1 d4orzc\_ d1mlbb1  
d4hgkc1 d1dqdl1 d1bogb1 d4ozhe1 d1dr9a1 d1i7za1 d1dn0b1 d1kell1  
d1rzib1 d1ypzfl1 d1wtla\_ d1hkfa\_ d1fail1 d1figh1 d2vyre\_ d1sjva\_  
d1ohqa\_ d1bfoa1 d1pkqb1 d1mjul1 d1b4j11 d1nsn11 d2arjb1 d1p4bh\_  
d4aj0a\_ d3nn8b\_ d2rcja1 d1f2xk\_ d4v1dd\_ d1adqh1 d2eksa\_ d4k3ga\_  
d1jfqh1 d1uweh1 d1frgh1 d4gftb\_ d1uz8b1 d4n1ea\_ d1bm311 d1cl011  
d3mcka1 d2vq1a1 d1ae6h1 d4aq1b1 d1uj3b1 d1nbqa1 d1fh511 d2ck011  
d2ywza\_ d1q7211 d4nbxb\_ d1hila1 d4hz1b1 d2j8811 d1zmya1 d1cd0a\_  
d1a4ka1 d1psk11 d1a0qh1 d4krmb\_ d1ncbh1 d2fbjh1 d1j8he1 d1i3ua\_  
d1cf811 d1fe8h1 d2p1ya1 d1eeqa\_ d2x89a\_ d1ol0a\_ d2r0lh1 d1ub5a1  
d1dfbh1 d3eyvb1 d4jdvb1 d4p2cg\_ d2gsia1 d2agj11 d1u3ha1 d2h1ph1  
d1rihl1 d1fskc1 d1boga1 d2a7711 d1ospl1 d1qfoa\_ d3dwta\_ d2fx711

d1rz7l1 d3stba1 d1pkqa1 d1b6da1 d1dzba2 d1dzba1 d1kj2a\_ d4l1ha\_  
d1rzgb1 d1dq1h\_ d12e8l1 d1miel1 d1jmaa\_ d1sbsl1 d1fgnh1 d1f58l1  
d1mqkh\_ d1ndgb1 d3qeg11 d1iail1 d2aw2a1 d1tqbc1 d3fo2a1 d4dkaa\_  
d1f8th1 d2g60l1 d2ywya\_ d1uj3a1 d1yc7a\_ d3bd3a\_ d4w6xb1 d1nmb1\_  
d1i8ka\_ d1rjlb1 d1ypze1 d1p7kb1 d1kxqe\_ d1gpoh1 d2z4qa1 d1w72h1  
d1i9r11 d4qgya1 d4xt1c\_ d2qqnh1 d1cica1 d3c08h1 d2cd0a\_ d2bdnh1  
d1hnga1 d1mam11 d1nldh1 d1cr9h1 d4lcih1 d3bkyh1 d3qg7l1 d1ai111  
d1kxvc\_ d4iosd\_ d1l7ih1 d2x1qa\_ d1ub6b1 d3k74b\_ d1libgh1 d1teth1  
d1igya1 d1hxma1 d2x6ma\_ d2e71a\_ d5e03a\_ d1qfwm\_ d2r0kh1 d1igjb1  
d1rurh1 d1plgh1 d1mj8h1 d1yuhb1 d3fmg11 d1rzfl1 d1emt11 d1ad9b1  
d1igtb1 d1nbl11 d1d5ih1 d3k7ua\_ d4ffyh\_ d1bwwa\_ d3dvga1 d1a6ta1  
d1fgvl\_ d4qxgl1 d1mim11 d1jhl1\_ d2hffb1 d2hh0l1 d1qkzh1 d1l7tl1  
d1afvh1 d1iaii1 d2cjuh\_ d1um5h1 d2ghwb2 d2ghwb1 d1kgce1 d2fgwh1  
d1ikfh1 d1dvfd\_ d2i24n1 d2xtjb\_ d1za3b1 d2yc1a\_ d2hh0h1 d2x1oa\_  
d1bvka\_ d1rjla1 d5e7ba1 d1igta1 d1i11b1 d2fb4l1 d1mvua\_ d1jpt11  
d32c2a1 d1fvca\_ d1iqdb1 d2hrph1 d2p4ab\_ d4qo1a\_ d1p2cb1 d1wt5c\_  
d1t4ka1 d5c1mb\_ d1it9l1 d1bz7a1 d1b2wh1 d1e4wl1 d1jnl11 d1yedb1  
d1za6b1 d3u7aa\_ d1igfh1 d3gnml1 d1orsa1 d1wejl1 d1a2ya\_ d1hxmb1  
d1gafh1 d2j4wh1 d1pz5a1 d1j05a\_ d1a3rh1 d4fq1l1 d1qfwh\_ d1eo8h1  
d1n7mh1 d4s11a\_ d1kegh1 d5da4a\_ d1iqwl1 d3whxb1 d1vgeh1 d1deeb1  
d1c12b1 d1t2ql1 d1ad9a1 d3gsnb1 d3b2uc1 d1ggbh1 d1t3fb1 d1nak11  
d4ocmc\_ d1lila1 d2v7hb3 d2esve1 d1mcoh1 d2qr0b1 d2q3aa\_ d1ct8a1  
d1kcr11 d2pxyb\_ d2uzih\_ d5c3ld\_ d3durb\_ d1c5cl1 d2ak4e1 d1d17h\_  
d1xiwd\_ d1mlba1 d1rmfl1 d1i7zb1 d1dlfl\_ d2xa3a\_ d5bq7b1 d1dqqb1  
d3h42l1 d1egjh1 d1kcvl1 d1fe8l1 d2j6el1 d1f3rb2 d1l1k3l1 d1sm3h1  
d1q0xh1 d1ghfh1 d7fabl1 d1igch1 d1l00h1 d4idla\_ d5c2b1\_ d1jrh11  
d1lilla1 d3zhda1 d4kfzc\_ d1b0wa\_ d1e6oh1 d1mex11 d4krpb\_ d1fnsh1  
d1ncwh1 d4hgma\_ d4eigb1 d4rzca\_ d2mpa11 d4y5xa\_ d5en2b1 d3lrga1  
d4ej1c1 d1rhha1 d1j05b\_ d1forh1 d1q9wb1 d2wzpd\_ d2aq2a1 d1h0da1  
d3revb1 d2ij0c1 d1tzha1 d4m7jl1 d1k6ql1 d3b9kc1 d1igml\_ d3qeua1  
d1dsfl\_ d1celh1 d1kcu11 d1zvha1 d1zvoa1 d1tqbb1 d1ay1l1 d2qsc11  
d2cgrh1 d1nl0h1 d1ken11 d3eo0a1 d4n9ob1 d1n0xl1 d3k1kc\_ d1c4qa\_  
d1prtc1 d2wv6d\_ d1l1trd\_ d4l63b1 d1r4pb\_ d1prtd\_ d1tl0f\_ d2bosa\_  
d1prtb1 d3chbd\_ d2aq2b1 d1ck1a1 d1enfa1 d1i4pa1 d1v1oa1 d1et9a1  
d1esfa1 d2g9hd1 d4ohja1 d1klud1 d1bxta1 d1ty0a1 d1fnua1 d2cqva1  
d1fhga\_ d2k1ma\_ d1biha3 d1biha1 d1biha4 d3qp3a1 d1glca\_ d1gxea\_  
d1cvsc2 d1cvsc1 d1xmwa2 d1m4ka2 d2otpa2 d1biha2 d1rhfa2 d2fcba2  
d2fcba1 d1wwbx\_ d1gsma2 d1lepfa1 d1lepfa2 d2dava1 d1waaa\_ d1f97a2  
d1x44a1 d1vcaa2 d1fnla2 d1fnla1 d3b5ha2 d3h8na2 d3h8na1 d1bjba1  
d1bjba2 d1pd6a\_ d1f2qa2 d1f2qa1 d3cx2a\_ d1nbqa2 d3b5ha1 d1n26a1  
d1xiwb\_ d1xaua\_ d1fltx\_ d2ifga1 d1olla1 d1olla2 d1cs6a4 d1cs6a3  
d1cs6a2 d1cs6a1 d2gw5a2 d1sy6a1 d1xiwa\_ d1lucta2 d1lucta1 d1ry7b2  
d1gl4b\_ d1qz1a3 d1olza1 d2c9aa1 d1wwca\_

**Family-12 (a.3.1.1)**

**Positive dataset contains 10 protein sequences.**

d4gedb\_ d3zooa\_ d2bh4x\_ d2aiua\_ d2zboa\_ d3dmia\_ dlwvec\_ d2yk3a\_  
d3ph2b\_ d5aura\_

**Negative dataset contains 4078 protein sequences.**

d1m32a\_ d1libja\_ d1iuga\_ d4q75a\_ d2bkwa1 d1t3ia\_ d1n8pa\_ d1qz9a\_  
d1jf9a\_ d1leg5a\_ d1p3wa\_ d3kgwa\_ d1c11a\_ d2ctza1 d1vjoa\_ d2rfva\_  
d1gc0a\_ d1cs1a\_ d1d2fa\_ d2ch1a1 d1qgna\_ d1pffa\_ d1elua\_ d1orva2  
d1xfda2 d1u08a\_ d1lc5a\_ d1b5pa\_ d2ay1a\_ d1bw0a\_ d3pd6a\_ d7aata\_  
d2csta\_ d1fg7a\_ d4wlha\_ d1o4sa\_ d1v2da\_ d1gdea\_ d1m6sa\_ d1v72a1  
d1svva\_ d1ajsa\_ d1wsta1 d2f8ja2 d1lk9a\_ d1vp4a1 d1xi9a1 d2gb3a1  
d1yaaa\_ d1xkla\_ d2wfla\_ d1xkta1 d2hfka\_ d1jmkc\_ d5d3ka\_ d2cfba1  
d1dfoa\_ d1o69a\_ d1bj4a\_ d3k28a\_ d2bwpa\_ d3lg0a\_ d2fnua\_ d3ou5a\_  
d1z7da1 d1b9ha\_ d1iaya\_ d4msoa\_ d1bs0a\_ d1s0aa\_ d1sffa\_ d3tqxa\_  
d1mdoa\_ d3qboa\_ d3pgya\_ d1bjna\_ d2dkja\_ d1ejia\_ d1vefa1 d4wxga\_  
d3bs8a\_ d3gbxa1 d1w23a\_ d1sefa\_ d1sfna\_ d1rc6a\_ d1r0ka3 d1j5pa3  
d1vkoa2 d1vm6a2 d3qvsa2 d1gr0a2 d1p1ja2 d1ddla\_ d1e57b\_ d1auyb\_  
d1f56a\_ d1bypa\_ d1azca\_ d1ws8a\_ d3u25a\_ d1cuoa\_ d1lid2a\_ d1rkra\_  
d2iaac\_ d4dp1x\_ d1nwpa\_ d2gima\_ d2i7sa\_ d1qhqa\_ d3ehbb1 d1fftb1  
d1gyca3 d1hfua2 d1kbva1 d1kbva2 d1sdda1 d1sdda2 d1gyca1 d1gyca2  
d1mzya1 d2bw4a1 d1aoza1 d1aoza3 d1aoza2 d1kyaa2 d1kyaa3 d1kyaa1  
d1mzya2 d4e9sa1 d1sddb1 d1sddb2 d1hfua1 d1hfua3 d1oela2 d1oela1  
d1v10a2 d1v10a3 d1v10a1 g1f8v.1 d1novc\_ d2bbvc\_ glor0.1 g1cp9.1  
g1e3a.1 d1liknc\_ d3brda1 d1p7h11 d1loy3c\_ d1imhc1 d1gjia1 d1zk9a1  
d2cxka1 d2bema\_ d1pama1 d1ea9c1 d1qhoa1 d2fhfa2 d2fhfa1 d1k3ia1  
d1j0ha1 d1cxla1 d2bhua1 d1edqa1 d1f1sa2 d1ut9a2 d1gvia1 d1txka1  
d4alac\_ d1pjwa\_ d1s6na\_ d3uzqb\_ d2phla1 d1fxza2 d1fxza1 d1lrha\_  
d1uija1 g1dgw.1 d2v09a\_ d1uika2 d1uika1 d1dgwa\_ d1ktja\_ d1ds6b\_  
d1fstb\_ d1ex0a1 d1g0da1 d1p8ba\_ d1ku5a\_ d1b67a\_ d1tafa\_ d1bh9b\_  
d1tafb\_ d1jfifb\_ d1q9ca\_ d1h3ob\_ d2byka1 d1n1ja\_ d4g92b\_ d1bh9a\_  
d1jfia\_ d1h3oa\_ d2bykb1 d1ydwa2 d2nvw2 d1h6da2 d1zh8a2 d1qkia2  
d1xeaa2 d1tlta2 d1e3oc2 d1lic8a2 d2ovga\_ d1sq8a\_ d1rzsa\_ d3kz3a\_  
d3orca\_ d3gpdg2 d2q49a2 d1hdgo2 d2g17a2 d2cvoa2 d2czca1 d3pwka2  
d1obfo2 d1i32a2 d1zyao2 d2pkqo2 d1b7go2 d2hjsa2 d1cf2o2 d1vkna2  
d1nvm2 d2msya\_ d2djoa1 d2r5za\_ d1au7a1 d1f43a\_ d2lmda1 d1akhb\_  
d1s7ea1 d3nara\_ d1zq3p1 d2craa1 d1mija\_ d4uuta\_ d3a01a\_ d1x58a1  
d3rkqa1 d3cmya1 d2cqxa1 d2da6a1 d1e3oc1 d1fjla\_ d1mh3a1 d1ig7a\_  
d1x41a1 d1wh7a1 d1gt0c1 d2mw8a\_ d1lfup\_ d1x2ma1 d1b72a\_ d1wi3a1  
d1wjha1 d1x2na1 d1mnmc\_ d2cuea1 d3k2aa\_ d2hosa\_ d2jwta2 d1pufa\_  
d1octc1 d2hi3a\_ d1b8ia\_ d4j19a\_ d3lnqa\_ d1wh5a1 d1b8ib\_ d1fexa\_  
d2cqra1 d1guua\_ d1ug2a1 d2cqqa1 d2ajea1 d4a69c\_ d1h8ac1 d2crga1  
d2iw5b1 d1xc5a1 d1ofcx1 d2cu7a1 d1wgxa1 d2cjja1 d2ckxa1 d1gvda\_  
d1hcra\_ d1tc3c\_ d1gdta1 d1u78a2 d1hlva2 d1iufa2 d1iufa1 d2iu5a1  
d1zk8a1 d2g7sa1 d2fd5a1 d2np5a1 d1z0xa1 d2id6a1 d2d6ya1 d2i10a1  
d1vi0a1 d2oi8a1 d3c07a1 d2ns7a1 d2fq4a1 d2yvea1 d1t33a1 d2o7ta1



d1rkta1 d2np3b1 d2g7ga1 d2gena1 d2fbqa1 d2g7la1 d2gfna1 d2g3ba1  
d2jj7a1 d2hyja1 d1sgma1 d1ui5a1 d2hkua1 d2id3a1 d4jyka1 d1bl0a1  
d1bl0a2 d1d5ya2 d3lv8a\_ d1s3ga1 d1zaka1 d1s4qa\_ d3tvta2 d1uf9a\_  
d1khta\_ d1ckea\_ d1losna\_ d1p5zb\_ d4tmka\_ d3cm0a\_ d1tmka\_ d1jaga\_  
d3h86a\_ d1t0hb\_ d1nn5a\_ d2h92a\_ d3kb2a1 d2c95a1 d1yj5a2 d1kgda\_  
d1ly1a\_ d1vyva2 d1deka\_ d2grja1 d1p3ja1 d1y63a\_ d1e4ya1 d1s96a\_  
d3iija1 d1lvga\_ d1nksa\_ d1vyua2 d4e22a\_ d1qf9a\_ d1jjva\_ d1q3ta\_  
d1ki9a\_ d1lw7a2 d1teva\_ d1kjwa2 d1gsia\_ d1m7ga\_ d1x6va3 d1g3ma\_  
d1j99a\_ d1t8ta1 d1nsta\_ d1fmja\_ d1zrha\_ d1ls6a\_ d2a3ra\_ d1aqua\_  
d2zptx\_ d3ckla\_ d1texa\_ d1q44a\_ d2gwha\_ d1z0ja1 d3umra2 d3gj0a1  
d2gaoa1 d1yzga1 d1x3sa1 d1g7sa4 d1puja\_ d1udxa2 d1kk1a3 d2o52a\_  
d1jwyb\_ d1zcaa2 d1zcba2 d2fv8a1 d2cjwa\_ d3dz8a1 d1xzpa2 d1vg8a\_  
d4qxaa\_ d2ew1a1 d1x1ra1 d2bcgy\_ d3doea1 d3cona\_ d3rega\_ d3wyga\_  
d1upta\_ d2b6ha1 d1zd9a1 d1lnza2 d1r5ba3 d1n0ua2 d1r2qa\_ d2f91a1  
d2rhda\_ d3q3jb\_ d3q85a\_ d1efma1 d1r8qa\_ d2gf9a1 d2akab1 d1ek0a\_  
d1z08a1 d2gcoa1 d2dy1a2 d4g01b\_ d2cxa1 d1svia\_ d3q72a\_ d1ni3a1  
d4ac9a4 d2erxa1 d2bmea\_ d1wxqa1 d2gf0a1 d4ldja1 d1zunb3 d1d5ca\_  
d4lv5b\_ d1efca3 d1kmqa\_ d2g6ba1 d3lrpa\_ d1tada2 d2y8ea\_ d4rd4a1  
d1z06a1 d2heia\_ d3a58b\_ d1u01a2 d1d2ea3 d1zj6a1 d2ocba\_ d3rwoa\_  
d1mr3f\_ d2e9sa1 d4u5xa1 d2iwra\_ d2fn4a1 d3bwdd\_ d2nzja1 d2atva1  
d2ksqa\_ d3l43a\_ d1mkya2 d1mkya1 d1wmsa\_ d1jnja3 d2rmka\_ d1f6ba\_  
d1f60a3 d1gota2 d1jala1 d2fh5b1 d1g16a\_ d2wblc\_ d1m7ba\_ d1wf3a1  
d1f5na2 d1t9ha2 d1z6xa1 d1z0aa1 d2fg5a1 d2a5ja1 d2bcjq2 d1s0ua3  
d1ky3a\_ d4y0va\_ d4lhwa\_ d2qmea1 d2atxa1 d1egaa1 d1ryha\_ d1moza\_  
d1nrjb\_ d2erya1 d3bfka\_ d1puia\_ d3j3az1 d3t5ga\_ d1shza2 d3defa\_  
d2f7sa1 d3raba\_ d3tsoa\_ d3aq4a\_ d2a17a1 d3sfva1 d3bc1a\_ d2ncda\_  
d1sdma\_ d3h4sa1 d2heha\_ d2grya\_ g3kin.1 d1kk8a2 d1br2a2 d1goja\_  
d1f9va\_ d2mysa2 d1lkxa\_ d3t0qa\_ d4db1a1 d3gbja\_ d1ry6a\_ d1v8ka\_  
d1k8ka2 d3uleb1 d3i33a2 d3i33a1 d1bupa1 d1dkgd2 d1dkgd1 d4ci6a2  
d1jcf1a1 d4a2ba2 d2fxua1 d1yaga2 d1yaga1 d4cbua2 d1bupa2 d1lig8a1  
d1czan2 d1czan3 d1czan1 d1lig8a2 d1czan4 d1bg3a4 d1bg3a3 d1bg3a2  
d2d0oa3 d2d0oa2 d1nbwa3 d4zzva\_ d2xspa\_ d4v20a\_ d1ojja\_ d4ipma1  
d1gpia\_ d4csia\_ d3pfza\_ d3ovwa\_ d2yoka\_ d2nqya\_ d1h4ga\_ d1hixa\_  
d1oa2a\_ d1olra\_ d3b7ma\_ d4h7ma1 d3wp3a\_ d2vgda\_ d1ligoa\_ d3zsea\_  
d2nlra\_ d3wx5a\_ d1oa3a\_ d1pvxa\_ d1m4wa\_ d1f5ja\_ d1oa4a\_ d1ks5a\_  
d4ixla1 d2ah2a1 d1evsa\_ d1cnt1\_ d1pvhb\_ d1z7ca\_ d1huwa\_ d1bgea\_  
d1rhga\_ d1f6fa\_ d1f45b\_ d1axia\_ d1letea\_ d3tgxb\_ d1scfa\_ d2z3qa1  
d3qb1a\_ d1hula\_ d1m48a\_ d4nkqb\_ d1eera\_ d1v7mv\_ d5e4ea\_ d2o27a\_  
d3b5ka\_ d2psma1 d4zf7a\_ d3uf5a\_ d4x51a\_ d1d9ca\_ d4ypgc1 d3oq3a\_  
d1lqs1\_ d1n1fa\_ d1au1a\_ d1wu3i\_ d3bes1\_ d3ux9a\_ d4dnxa2 d1m8pa2  
d1v47a2 d1g8fa2 d1x6va2 d2el7a\_ d1iq0a2 d1irxa2 d1r6ta2 d1ivsa4  
d2cyba\_ d1rqga2 d1j09a2 d2yxna\_ d1f7ua2 d1h3fa1 d2g36a1 d1nzja\_  
d1jila\_ d1n3la\_ d1i6la\_ d1pfva2 d1h3na3 d3n9ia\_ d3sz3a1 d3sw2a\_  
d1moxc\_ d1dx5i3 d1edmb\_ d1aut12 d1aut11 d1nqlb\_ d1dval1 d1szba2

d1kigl\_ d2y5fl\_ d1ijqa2 d1gk5a\_ d1g1sa2 d1nt0a3 d1lmja2 d1lmja1  
d1nzia2 d2wphe\_ d1klil\_ d1pfxl2 d1pfxl1 d1p9ja\_ d1g1ta2 d1f7ea\_  
d4yzub\_ d1gl4a2 d1qx2a\_ d2y5ia\_ d1psra\_ d3n22a\_ d2egda\_ d4ggfc\_  
d2wcea\_ d2luca\_ d4aqia\_ d3nsia\_ d2lp3a\_ d1j55a\_ d1a4pa\_ d1k8ua\_  
d1nsha\_ d1exra\_ d1tiza1 d1nyaa\_ d1g8ia\_ d1ggwa\_ d1wdcc\_ d3fwba\_  
d1ggza\_ d2o5ga\_ d1ctaa\_ d1m45a\_ d3i5gc\_ d1sl8a\_ d1fpwa\_ d2scpa\_  
d2roaa\_ d4aqra\_ d3pn7b\_ d1br1b\_ d2mysb\_ d1s6ca\_ d1bjfa\_ d2obha\_  
d1jfka\_ d1jf0a\_ d1qv0a\_ d1lkja\_ d2mlfc\_ d2m97a\_ d2d8na\_ d4by5a\_  
d1jbaa\_ d4nqga\_ d1wdcb\_ d2mysc\_ d1j7qa\_ d1s6ia\_ d1uhka2 d1r2ua\_  
d1dtla\_ d3kf9a\_ d3pn7c\_ d1qjta\_ d1fi6a\_ d5d67d\_ d1tuza\_ d1h8ba\_  
d1eg3a2 d2zkmx1 d1snla\_ d1y1xa\_ d1hqva\_ d1dvia\_ d1df0a1 d1qxp2  
d4usla\_ d1k94a\_ d1wkya2 d1uuqa\_ d3wh9a\_ d4mlra\_ d1xyza\_ d4xuya\_  
d2je8a5 d4bf7a1 d3cuia\_ d1ur4a\_ d1odza\_ d2vzsa5 d1bqca\_ d2x2ya1  
d1hjqa\_ d1qnra\_ d4y7ea1 d1vjza\_ d4k68a\_ d2v3ga\_ d4hpga\_ d1nofa2  
d1nq6a\_ d1h4pa\_ d1aq0a\_ d3ziza\_ d4bs0a\_ d1ecea\_ d1h1na\_ d1ta3b\_  
d1w9la2 d1ilwa\_ d1uhva2 d1us3a2 d1legza\_ d7a3ha\_ d1tvna1 d3nyda1  
d1ghsa\_ d2cyga1 d4xv0a\_ d2c8na2 d1w32a\_ d3emca\_ d1v6ya1 d1foba\_  
d2uwfa1 d2fgla\_ d3niya1 d2c0ha1 d1rh9a1 d1yq2a5 d1szna2 d1fa2a\_  
d1pama4 d5do8a1 d1ea9c3 d1hx0a2 d2fhfa5 d1qhoa4 d1avaa2 d1m53a2  
d4m8ua1 d2gjpa2 d1lwha2 d4howa1 d1ktba2 d1j0ha3 d3vm5a1 d2x1ia\_  
d1wzaa2 d1uasa2 d2diea1 d1mxga2 d1ht6a2 d1eswa\_ d1liv8a2 d5cpsa\_  
d1ud2a2 d1zjaa1 d3gbea1 d1kwga2 d1wdpa\_ d1gcya2 d1g5aa2 d1hvxa2  
d3dhpa2 d2bhua3 d4do4a1 d3qgva1 d1e43a2 d1g94a2 d2d3na2 d1gjwa2  
d1gvia3 d1x1na1 d1r7aa2 d1tz7a1 d4toqa\_ d1wb0a1 d1w9pa1 d1eoka\_  
d1itxa1 d1kfwal d1goia2 d1edqa2 d2gsja\_ d1hjxa1 d1jnda1 d1vf8a1  
d3wdpp1 d3wq5a\_ d1gnxa\_ d4gxpa\_ d4hz8a\_ d1e4mm\_ d3aiua\_ d1wcga1  
d1qvba\_ d3ahxa\_ d1v02a\_ d2dga\_ d1pbga\_ d1vffa1 d1qoxa\_ d4ha4a\_  
d2w0pa\_ d2diaa1 d2e9ia2 d2e9ja1 d2dj4a1 d2eeba1 d2diba1 d2dmba1  
d2dmca1 d2d7oa1 d2ee6a1 d2d7pa1 d2eeaa1 d2di8a1 d1wlha1 d2d7na1  
d2nqca\_ d2d7ma1 d2dica1 d3cnka\_ d2k3ta1 d2eeca1 d1qfha2 d2bp3a1  
d1v05a\_ d2ee9a1 d2eeda1 d2di9a1 d3syxa1 d1mkea1 d2p8va\_ d1xoda1  
d1i7aa\_ d1evha\_ d1qc6a\_ d1legxa\_ d1id1a\_ d2hmta\_ d2v76a\_ d1wj1a1  
d1aqca\_ d1qgga1 d1ntva\_ d1n3ha\_ d4dbba\_ d3f0wa1 d1p3ra\_ d1wgua1  
d2cy4a1 d3hqca\_ d1wvha1 d1xr0b1 d1wgqa1 d1v89a1 d2coda1 d1zc3b\_  
d1wg7a1 d1u5ea1 d1v61a1 d2coca1 d2ys1a1 d1v5pa1 d1nty2 d1wjma1  
d1wila1 d1u29a\_ d1xx0a1 d1unqa\_ d2zkmx3 d1fhoa\_ d1v88a1 d2adza1  
d1x1fa1 d1p6sa\_ d2coaa1 d1btka\_ d1v5ma1 d1faoa\_ d2x18a\_ d1dyna\_  
d1x1ga1 d4kaxb\_ d2j59m1 d1ki1b2 d1xcga2 d1txda2 d1u5da1 d1dbha2  
d1wlha\_ d1upqa\_ d1v5ua1 d2fjla1 d1eaza\_ d2dfka2 d2cofa1 d1kz7a2  
d1h6ta1 d1h6ua1 d9ldta1 d2ewda3 d1up7a1 d2dfda1 d1s6ya1 d1vjta1  
d7mdha1 d1hyea1 d1t2da1 d1ojsa3 d1b8pa1 d1ldna1 d1hyha1 d1civa1  
d2a92a1 d1ez4a1 d1i0za1 d1y6ja1 d1gv0a1 d1ur5a1 d1llda1 d1loba1  
d1v8ba1 d1gdha1 d1l7da1 d2dlda1 d1mx3a1 d1ygya1 d1qp8a1 d1li4a1  
d1j4aa1 d2naca1 d1etob\_ d1umqa\_ d1g2ha\_ d1kola2 d1f8fa2 d1qora2

d1jqba2 d1vj0a2 d1cdoa2 d1gu7a2 d1d1ta2 d1xa0a2 d2dm6a2 d1jvba2  
d1rjwa2 d1llua2 d1h2ba2 d1tt7a2 d1piwa2 d1o89a2 d1iz0a2 d1e3ja2  
d1yb5a2 d1uufa2 d1vj1a2 d1e3ia2 d3gpdg1 d1vc2a1 d2nvwal d1u8fo1  
d1ydwa1 d1hdgo1 d2g17a1 d1cf2o1 d2czca2 d1r0ka2 d1obfo1 d2cvoa1  
d1ebfa1 d1h6da1 d1i32a1 d1zh8a1 d2q49a1 d1qkia1 d3pzra1 d1xeaa1  
d1vkoa1 d1vm6a3 d3qvsa1 d2pkqo1 d1b7go1 d1gr0a1 d1p1ja1 d1lc0a1  
d1j0xo1 d3pwka1 d2hjsa1 d1zyao1 d1vkna1 d1tlta1 d1nvmbl d3sjua\_  
d3ojfa1 d1xu9a1 d2jjya1 d1n7ha\_ d1y1pa1 d1h5qa\_ d1jtva\_ d4fs3a\_  
d2bkaa1 d1gy8a\_ d2c5aa1 d1ulsa\_ d1ooea\_ d2b69a1 d1y5ma1 d1ae1a\_  
d1bxka\_ d1ydea1 d1gega\_ d1hdoa\_ d1o5ia\_ d1e6ua\_ d1snya1 d2rhca\_  
d3zv4a\_ d5ceja\_ d2d1ya1 d1fjha\_ d3w8ea\_ d2fmua1 d1x1ta\_ d1rpna\_  
d3ay7a1 d1k2wa\_ d1eq2a\_ d2hrba1 d3ruaa\_ d2ew8a1 d4hwka\_ d1xgka\_  
d2bd0a1 d1yo6a1 d2a35a1 d2ntva\_ d1vl8a\_ d1hdca\_ d4bkua\_ d2ag5a1  
d2q45a\_ d1nffa\_ d4iy1a\_ d1zbqa1 d1kewa\_ d1ek6a\_ d1ja9a\_ d2q46a2  
d1iy8a\_ d1cyda\_ d2ptga\_ d1hxha\_ d1uzma1 d3lyla\_ d4m89a\_ d3wyea\_  
d2blla1 d1w6ua\_ d1sb8a\_ d2q2va\_ d4nr0a\_ d1e6wa\_ d2gasa\_ d3oiga1  
d2bgka1 d1mxha\_ d1vl0a1 d1rkxa\_ d1r6da\_ d1wmaa1 d1e7wa\_ d2c07a1  
d1xkqa\_ d3tzha\_ d1g0oa\_ d3lz6a\_ d1qyca\_ d1ledoa\_ d1gz6a\_ d1loc2a\_  
d1t2aa\_ d1zema1 d2xoxa\_ d1z45a2 d1geea\_ d1p33a\_ d3lt0a\_ d4e6pa\_  
d2wyua\_ d1db3a\_ d4q9na\_ d1xhla\_ d4o1ma\_ d1fmca\_ d2uvda\_ d2gdza1  
d1uaya\_ d2z1ma\_ d2o23a2 d2fr1a2 d2fr1a1 d1qsga\_ d1qyda\_ d4zjua\_  
d2a4ka1 d1ybl1a\_ d1wvga1 d1yxma1 d3f4ba\_ d1mg5a\_ d1xg5a1 d1r55a1  
d3gboa\_ d1atla\_ d1kufa\_ d1buda\_ d4q11a\_ d1ypl1a\_ d1wnia\_ d4ekfa\_  
d2ckga\_ d1th0a\_ d2bkra\_ d3ulra1 d1g9ka2 d1kapp2 d3ioqa\_ d1fh0a\_  
d1o0ea\_ d1khqa\_ d1m6da\_ d2cb5a\_ g8pch.1 d1s4va\_ d2pnsa\_ d1vsna1  
d1mira\_ d1liwda\_ d2oula\_ d7pcka\_ d3bwka\_ d3bcna\_ d2p86a\_ d1pvja\_  
d1pcia\_ d1gece\_ d1deua\_ d4bs6a\_ d1xkga1 d1cqda\_ d1jqpa2 d2c0ya\_  
d2bdza\_ d3p5ua\_ d2o36a\_ d1k9xa\_ d1zoya1 d1qo8a2 d1d4ca2 d1jnra2  
d1kf6a2 d2jk6a2 d2jk6a1 d1feca1 d1feca2 d1lpfa1 d1lpfa2 d1xhca1  
d1xhca2 d1dxla2 d1dxla1 d1gera2 d1m6ia2 d1onfa1 d1onfa2 d3lada2  
d3lada1 d1w4xa1 d1w4xa2 d1gesa2 d1mo9a1 d1xdia1 d1fl2a2 d1fl2a1  
d1fcda1 d1fcda2 d1h6va2 d1h6va1 d1mo9a2 d1gv4a2 d1gv4a1 d2gv8a2  
d2gv8a1 d1aoga1 d1aoga2 d1hyua1 d1ebda1 d1ebda2 d3dk9a1 d1q1ra2  
d1q1ra1 d1gesa1 d1zbf1a1 d2z1ha\_ d2etja1 d3qioa1 d1j11a\_ d2e41a\_  
d1j12a\_ d2lsna1 d1lio2a\_ d1uaxa\_ d2yv0x\_ d1mu2a1 d1ekea\_ d1pn0a1  
d1reoa1 d1ju2a1 d2f5va1 d3c96a1 d2gmha1 d1gpea1 d1o5wa1 d1n4wa1  
d1k0ia1 d2dw4a2 d2ivda1 d1seza1 d2voua1 d1kdga1 d1s5ja1 d2hbja2  
d2igia\_ d1wlja\_ d1qhta1 d4dlea1 d1tgoa1 d2f96a1 d3tr8a1 d3mxma\_  
d1q8ia1 d1y97a1 d1w0ha\_ d1kfsa1 d2py5a1 d1noya\_ d1d5aa1 d1yt3a3  
d2guia\_ d3mwp1a1 d4kb1a\_ d1liv0a\_ d1nu0a\_ d4qmea2 d2xdta2 d1z5ha2  
d3nvva1 d1krha3 d2h88b1 d1n62a2 d1t3qa2 d1zoyb1 d1jq4a\_ d1ffva2  
d1dgja2 d1rm6c2 d1r7ha\_ d1faaa\_ d1wika1 d1xfla\_ d1ttza1 d2f51a1  
d1ti3a\_ d1nhoa\_ d1sena\_ d2i4aa\_ d1zmaa1 d1fo5a\_ d3lefa1 d3diea1  
d2yana1 d1z6na1 d1oaza\_ d3zywa1 d4aj8a\_ d1nm3a1 d4fiwa\_ d1wmja\_

d4hs1a1 d1liloa\_ d1xwaa1 d1lwjka1 d2vm1a\_ d1fb6a\_ d1gh2a\_ d1h75a\_  
d1nw2a\_ d1kx5b\_ d3a6na\_ d4m6ba2 d2nqbd\_ d3wkjd\_ d2yfwe\_ d4h9na\_  
d5bnxa\_ d1kx5c\_ d3r45a\_ d1eqzb\_ d4jjnb\_ d1f66c\_ d1eqza\_ d4wnnb\_  
d1kx5a\_ d1u35c1 d1lid3a\_ d2nqbc\_ d1kx5d\_ d3us3a3 d3us3a1 d1um8a\_  
d1qvra2 d1qvra3 d1qzma\_ d1sxjc2 d1jr3d2 d2p65a\_ d1l8qa2 d1g8pa\_  
d3hu3a3 d1sxjd2 d1njfa\_ d1in4a2 d1sxja2 d1tuea1 d2ce7a2 d1w5sa2  
d1sxjb2 d1d2na\_ d1ny5a2 d1ofha\_ d2gnoa2 d2a5yb3 d1fnna2 d1u0ja1  
d1lv7a\_ d1iqpa2 d2fnaa2 d1ixsb2 d4gita\_ d1sxje2 d1g41a\_ d1pd212  
d1nhya2 d2a2ra2 d1k0dd2 d1f2ea2 d1f3ba2 d2fhea2 d2pvqa1 d1tw9a2  
d1oyja2 d1e6ba2 d1k0ma2 d3ik7a1 d4is0a1 d1r5aa2 d1jlva2 d1m0ua2  
d3gtub2 d1z9ha2 d1okta2 d1axda2 d2gsra2 d1tu7a2 d1k3ya2 d1zgm1  
d1b48a2 d1gnwa2 d1gwca2 d2gsta2 d1glqa2 d1oe8a2 d1pn9a2 d1v2aa2  
d1fw1a2 d1duga2 d2trcp\_ d3t4ea2 d1a4ia1 d1o0sa1 d2hk9a2 d2egga2  
d1b26a1 d1bvua1 d1gq2a1 d1c1da1 d1leha1 d1gtma1 d1euzal d1nvtal  
d3dona2 d1edza1 d1gpja2 d1vi2a1 d1p77a1 d1nyta1 d1b0aa1 d1vl6a1  
d1v9la1 d4ilya\_ d4olta\_ d1qgia\_ d1txga2 d3f47a1 d1mv8a2 d2pv7a2  
d1xc2a3 d2ahra2 d4xiya1 d2f1ka2 d1pgja2 d1i36a2 d1np3a2 d1lj8a4  
d1teaa3 d1qmga2 d2i76a2 d2g5ca2 d1wdka3 d1dlja2 d3cuma3 d1qqya\_  
d1f6ra\_ d1livma\_ d2gv0a\_ d1iiza\_ d2z2fa\_ d1j8xa\_ d1ghla\_ d1b9oa\_  
d1741a\_ d1691a\_ d2o4wa\_ d1p37a\_ d1k28a3 d1xjta1 d1jtma\_ d2f2qa\_  
d4e97a1 d2za0a\_ d2c21a1 d2pjsa1 d1klla\_ d2i7ra1 d1ecea\_ d1xqaa1  
d5cj3a1 d1npba\_ d1jifa\_ d2p7oa\_ d1r9ca\_ d1mpya2 d1kw3b2 d1kw3b1  
d4ghga1 d1tfza1 d3isqa1 d3isqa2 d1sqia1 d1sqia2 d1lkda2 d1lkda1  
d1mpya1 d1cjxa1 d1sp9b2 d1t47a1 d1t47a2 d1f1ua2 d1sp8a1 d1sp8a2  
d1f1ua1 d1ro5a1 d1s5ja2 d1qhta2 d4dlea2 d1tgoa2 d3py8a2 d1q8ia2  
d2py5a2 d1d5aa2 d1qsta\_ d2beia1 d4m3sa\_ d1u6ma1 d1ygha\_ d1yk3a1  
d3dr6a\_ d1xmta\_ d1z4ea1 d2ge3a1 d1bo4a\_ d2fiaa1 d2jdca1 d1y9wa1  
d3to7a\_ d1wwza1 d2f14a1 d2ozua1 d2b5ga\_ d2cy2a1 d2p0wa\_ d1cm0a\_  
d4pswa\_ d1yrea1 d1yr0a1 d1m4ia\_ d2gana1 d1yvka1 d1ghea\_ d2g3aa1  
d1y7ra1 d2euia1 d1q2ya\_ d2fsra1 d1xeba\_ d2ae6a1 d1cjwa\_ d1qsma\_  
d2aj6a1 d1y9ka1 d1i12a\_ d1vkca\_ d2atra1 d1n71a\_ d2d4pa1 d2fiwa1  
d2fe7a1 d1tiqa1 d2ou2a\_ d1yx0a1 d2fcka1 d1p0ha\_ d2j8ma\_ d2pq8a\_  
d1z4ra1 d1s3za1 d1ufha\_ d2hqya1 d2hqya2 d1lrza2 d1ne9a1 d1ne9a2  
d1f37b\_ d1xvqa1 d1pn0a2 d3hy2a\_ d2cvba1 d1o8xa\_ d1lu4a\_ d1we0a1  
d2bmxal d2a4va1 d1psqa\_ d1xiya1 d1q98a\_ d1n8ja\_ d1zofa1 d2ggta\_  
d3tjja\_ d4je1a1 d1o73a\_ d3s9fa\_ d2zcta\_ d1qmva\_ d1jfua\_ d2b1ka\_  
d5dvba1 d2b5xa1 d2v2ga\_ d1st9a\_ d3tb2a\_ d4llra\_ d4fh8a1 d1e2ya\_  
d1knga\_ d2h30a\_ d1i5ga\_ d2z9sa\_ d2f8aa1 d1tp9a1 d2b7ka\_ d1nm3a2  
d3hvva\_ d2wfca1 d4kcea\_ d1xvwa1 d4gqca1 d3qpma\_ d4k1fa\_ d1zsoa1  
d1gp1a\_ d1prxa\_ d1rmka\_ d1ixta\_ d1eyoa\_ d1cnna\_ d1fu3a\_ d1g1pa\_  
d1f3ka\_ d1fyga\_ d4mh8a\_ d1mu2a2 d4i7ga1 d1ofda3 d1ea0a3 d1ecfa2  
d1q15a2 d1ct9a2 d1ao0a2 d1te5a\_ d1ys1x\_ d4hs9a\_ d1ispa\_ d1ex9a\_  
d3qmma\_ d1ra6a\_ d3gsza\_ d1khva\_ d1te9a\_ d2xwha\_ d3uqsa\_ d3hkwa\_  
d3n6ma\_ d2cjqa\_ d2xyma\_ d1teba\_ d1te8a\_ d1s48a\_ d1u09a1 d4wfxa\_

d3tyqa\_ d2pgga1 d1lgya\_ d4l3wa\_ d1llfa\_ dlukca\_ d1cr6a2 d3groa\_  
d1thta\_ d1ei9a\_ d2ftba\_ d1pmpa\_ d2rcqa1 d1fdqa\_ d4lkpa\_ d1sa8a\_  
d1vyfa\_ d1lpja\_ d3vg7a1 d4azqa1 d1o8va\_ d5bvqa\_ d1p6pa\_ d2qo4a\_  
d1opba\_ d1yiva1 d1o1va\_ d4bvma1 d4tkba\_ d4i3ba\_ d1bwya\_ d1ftpa\_  
d1ggla\_ d4gkca\_ d1cbia\_ d3p6da1 d1kqwa\_ d2a0aa1 d2ddfa\_ d3zxha\_  
d1cgla\_ d1rm8a\_ d1leaka2 d1hy7a\_ d2jsda\_ d1cxva\_ d1hv5a\_ d1i76a\_  
d3p0ya1 d1lgra1 d1lgra2 d1n8yc2 d1n8yc1 d1m6ba2 d1m6ba1 d1dzka\_  
d4tlja\_ d2a2ua\_ d4wfva\_ d3t1da\_ d4iaxa\_ d3zq3a\_ d2nnda\_ d1i4ua\_  
d1kxoa\_ d1bbpa\_ d1kt7a\_ d1exsa\_ d3s26a1 d1lf7a\_ d1qfta\_ d4gh7a\_  
d1z24a1 d1qabe\_ d1xkia\_ d1ew3a\_ d3bx7a\_ d4iawa1 d1n0sa\_ d1gkab\_  
d3kzaa\_ d2k23a\_ d2l9ca1 d2joza1 d1gm6a\_ d3kffa\_ d3saoa1 d1e5pa\_  
d1yupa1 d1iiua\_ d1h6ua2 d2tbvc\_ d1c8nc\_ d1x36a\_ d1smvc\_ d1ng0c\_  
d4sbvc\_ d1lopa\_ d1cixa\_ d1y29a\_ d1v7fa\_ d2jtba\_ d1d1ha\_ d1g9pa\_  
d1lupa\_ d1qk7a\_ d1mb6a\_ d2a2va\_ d1niya\_ d1i25a\_ d1hwva\_ d2mpqa\_  
d1ie6a\_ d1kqha\_ d1la4a\_ d2mxoa1 d1d10a\_ d1koza\_ d1qk6a\_ d1emxa\_  
d1lqra\_ d1c6wa\_ d1js9c\_ d1f15b\_ d1za7a\_ d1laja\_ d1rypd\_ d1lirua\_  
d1rypc\_ d3unfk\_ d1rypa\_ d1j2pa\_ d1lirui\_ d1j2qh\_ d3unfh\_ d1m4ya\_  
d1rypb\_ d1lirul\_ d1lirug\_ d1liru2\_ d1q5rh\_ d1rypg\_ d1g3ka\_ d1q5qa\_  
d1e94a\_ d1lirub\_ d1ryph\_ d3ty6a\_ d1liruj\_ d1liruk\_ d1rype\_ d1lirud\_  
d1lirue\_ d3mi01\_ d1rypf\_ d1liruh\_ d2z3ba\_ d1liruc\_ d3mka2\_ d1liru1\_  
d1ny721 d1a6ca3 d1a6ca2 d1a6ca1 d1pgl22 d1pgl21 d1pgl11 d1ny711  
d1mqta\_ d1d4m3\_ d1fmd3\_ d2mev1\_ g1aym.1 d1ev13\_ d4q4w1\_ d1rla3\_  
d2x5ia\_ d1rhi1\_ g1r1a.1 g1d4m.1 g1rhi.1 d1b35b\_ d1loopa\_ d1tme1\_  
d4iv1a\_ g1pvc.1 g1fpn.1 d1fpn1\_ d4gb31\_ d1d4m1\_ d1fmd1\_ d1ev11\_  
d2wzr3\_ g1cov.1 d1qqp3\_ g1fmd.1 d2x5ic\_ d1rhi3\_ g1oop.1 d1hxs1\_  
g1hxs.1 d1fpn3\_ d1bev1\_ g2mev.1 d1eah3\_ d1aym1\_ d1pvc3\_ d1zba3\_  
d1h8ta\_ d3vbhc\_ g1b35.1 g1bev.1 d1hxs3\_ g1ev1.1 d1bev3\_ g1tmf.1  
d1tmf1\_ d1b35a\_ d2mev3\_ g1eah.1 g1h8t.1 d1eah1\_ d4q4w3\_ d1rla1\_  
d1aym3\_ d1pvc1\_ d1zba1\_ d1h8tc\_ d1oopc\_ d1tme3\_ g1qqp.1 d4iv1c\_  
g1tme.1 d3ubub\_ d1legia\_ d1qo3c\_ d1v7pa\_ d1tdqb\_ d3ubua\_ d1c3ab\_  
d1h8ua\_ d3bx4b\_ d1t8ca1 d1sb2a1 d1qdda\_ d2ziba1 d3cada\_ d1byfa\_  
d1j34b\_ d1jwia\_ d1jzna\_ d1c3aa\_ d1wmza\_ d3bdwb\_ d1hq8a\_ d1fifa1  
d1dv8a\_ d3hupa\_ d1wk1a1 d1umra\_ d2afpa\_ d3bx4a\_ d1gz2a\_ d1sl6a\_  
d1v7pb\_ d3g8ka\_ d1ixxa\_ d1j34a\_ d1jwib\_ d1g1sa1 d1y17a1 d1ja3a\_  
d1fvub\_ d3bdwa\_ d1sb2b1 d1fvua\_ d1umrc\_ d1oz7a\_ d4m17a\_ d3cfwa1  
d1ypqa1 d1g1ta1 d3fd4a\_ d3l9jc\_ d4dn8a1 d1v41b\_ d1rd11\_ d2msba\_  
d4w9ta\_ d4x2ra1 d1ka9f\_ d1qo2a\_ d4axka1 d1thfd\_ d1h5ya\_ d4u28a\_  
d2y88a\_ d4wd0a\_ d1vzwa1 d1eixa\_ d3exra\_ d2ffca1 d2fdsa1 d3n3ma1  
d2czda\_ d1q6oa\_ d2yyua\_ d1vqta1 d1dbta\_ d3ldva1 d2flia1 d1h1ya\_  
d1tqja\_ d1tqxa\_ d4lt9a1 d3tc7a1 d3hoja\_ d1i4na\_ d3vnda\_ d3n18a1  
d1geqa\_ d3naval d1v5xa\_ d4a2ra1 d3tc6a1 d1ujpa\_ d4ijba\_ d1xcfa\_  
d1vc4a\_ d1rd5a\_ d1qopa\_ d3b5va\_ d2r80b\_ d1cqxa1 d1cg5a\_ d1gcvb\_  
d3boma\_ d2h8fb\_ d2raoa\_ d3bj1a\_ d4hrrb\_ d2r50a\_ d3d1kb\_ d2aalb1  
d3zhwa\_ d3hf4b\_ d3gdja\_ d1jebb\_ d3bj1b\_ d1x9fb\_ d1wmub\_ d1gcva\_

d3bcqb\_ d3d4xb\_ d1gvha1 d2dc3a\_ d3hf4a\_ d4yu3a\_ d3k8ba\_ d1qpwb\_  
d2r80a\_ d3bcqa\_ d1v4wa\_ d3wtgb\_ d1jl7a\_ d4esaa\_ d1a9we\_ d3d1ab\_  
d1fsla\_ d4h21a\_ d1v4wb\_ d1mwca\_ d1vhba\_ d1jeba\_ d1spgb\_ d1h97a\_  
d1q1fa\_ d1tu9a1 d3d1aa\_ d1hdsb\_ d3hyub\_ d2zfbb\_ d3fs4a\_ d1oj6a\_  
d1shrb\_ d4h21b\_ d4yu3b\_ d1spga\_ d3hrwa\_ d3qqra\_ d3at5a\_ d4wchd\_  
d3hyua\_ d1cg5b\_ d1uc3a\_ d1hbra\_ d2raob\_ d1outb\_ d4esab\_ d3gdjb\_  
d3qqqa\_ d1x9fc\_ d3vrfa\_ d1litha\_ d3mkba\_ d3d4xa\_ d3mjpa\_ d1jl6a\_  
d3fh9a\_ d1outa\_ d2dc3b\_ d1lit2a\_ d3eoka\_ d3g46a\_ d1qpwa\_ d3vrfb\_  
d1ch4a\_ d1x9fd\_ d1hdsa\_ d2zfba\_ d3mkbb\_ d1or4a\_ d3wtga\_ d1a4fa\_  
d3fh9b\_ d3bomb\_ d3cy5a\_ d3at5b\_ d1x9fa\_ d2oifa\_ d4lmbx\_ d1cpcb\_  
d3v57a\_ d1kn1a\_ d1cpca\_ d4f0ta\_ d2vjha\_ d4po5b\_ d1eyxa\_ d1alla\_  
d4f0tb\_ d1b33b\_ d1b8db\_ d4h0mb\_ d1b33a\_ d2vjhb\_ d4lm6b\_ d2vmlb\_  
d1allb\_ d2vjta\_ d3dbja\_ d2vmla\_ d2vjtb\_ d4f0ub\_ d1f99b\_ d4rmpa1  
d1liaa\_ d1eyxb\_ d2uulb\_ d4lmsb\_ d4f0ua\_ d2bv8a\_ d1f99a\_ d2bv8b\_  
d2c71b\_ d3dbjb\_ d4rmpb1 d1b8da\_ d4h0ma\_ d3v57b\_ d1liab\_ d2uula\_  
d2j96a\_ d1kyqa1 g1gxs.1 g1wht.1 d1hlga\_ d2xqfa\_ d1lea5a\_ d1f6wa\_  
d1dx4a\_ d1qe3a\_ d4qwwa\_ d2ha2a\_ d1r88a\_ d1sfra\_ d4qeka\_ d3c8da2  
d2pbla1 d1jkma\_ d1lzla\_ d1jjfa\_ d1jmx4 d1jmx3 d1pbya4 d1b9ra\_  
d1offa\_ d1frra\_ d3wcqa\_ d1e9ma\_ d1l5pa\_ d1wria\_ d1i7ha\_ d3av8a\_  
d1czpa\_ d1rfka\_ d3p1ma1 d3b2ga\_ d2bt6a2 d4iuaa3 d4bvva\_ d5hpga\_  
d3k65a\_ d1ki0a3 d1ki0a1 d1a0ha1 d1pmla\_ d3sp8a3 d2feba1 d1mdwa\_  
d1qxp4 d1ziva1 d1zcm1 d1f74a\_ d3l21a\_ d2e1da\_ d1to3a1 d1w3ia\_  
d1sfla\_ d1vcva1 d4imea\_ d1wa3a\_ d2ocza1 d1f2ja\_ d3m16a\_ d2yxga\_  
d1ub3a\_ d3a5fa\_ d1fbaa\_ d1l6wa\_ d1xfba1 d1wx0a1 d1vpxa1 d1ojxa\_  
d1mxsa\_ d2a4aa1 d1xkya1 d3cq0a1 d3s1xa\_ d1f05a\_ d1fdja\_ d3cpra1  
d4d2ja\_ d1yloa2 d1y7ea2 d1y0ya3 d1lfwa1 d1vixa1 d1fnoa4 d1vhoa2  
d1ysja1 d1vhea2 d1z2la1 d2fvga2 d1vgya1 d1r3na1 d2grea2 d1xmba1  
g1q7l.1 d1rtqa\_ d3rp2a\_ g1lucy.1 d1fuja\_ d2zchp\_ d3w94a\_ d1si5h\_  
d1lo6a\_ g2pka.1 d1cgha\_ d1kigh\_ d1a5ia\_ d3s9ba\_ d1hj8a\_ d1ao5a\_  
d2anya\_ d1q3xa1 d1gvza\_ d1azza\_ d4gsoa\_ d2f91a1 d1iaua\_ d1gdna\_  
d1eufa\_ g1fiw.1 d1eq9a\_ d4nfea\_ d2rdla\_ d1spja\_ d1elva1 d1a7sa\_  
d1ekbb\_ d1pfxc\_ d1yc0a\_ d2aiqa\_ g1fiz.1 d1fi8a\_ d4k60a\_ d4dgja\_  
d1mzaa\_ d1op0a\_ d3tjva\_ d1pytd\_ d1sgfg\_ g1gg6.1 d2eeka\_ g1rtf.1  
d1a0ja\_ d3g01a\_ d1pytc\_ d4e7na\_ d1ddja\_ d1z8ga1 d2hlca\_ d1npma\_  
d1brup\_ g1jou.1 d1sgfa\_ d1autc\_ g2hnt.1 g1kdq.1 d3s69a\_ d4crga\_  
d1fxya\_ d1bqya\_ d1svpa\_ d1mbma\_ d3su6a1 d1cula1 d4agka\_ d1vcpa\_  
d1q31a\_ g1n1l.1 d3e90b\_ d1ep5a\_ d3u1jb\_ d1m41a\_ d2bk7a\_ d3fjua\_  
d1z5ra1 d1kwma1 d1uwya2 d1jqga1 d2c1ca1 d1dtda\_ d1h81a2 d3lgia\_  
d3i77a\_ d2z9ia2 d4nsva\_ d1lcya2 d4jcna\_ d1agja\_ d1os8a\_ d1hpga\_  
d1p3ca\_ d1qtfa\_ d1e69a\_ d1mv5a\_ d3g60a4 g1ii8.1 d1ewqa2 d1ji0a\_  
d1qhla\_ d1v43a3 d2wmfa1 d1vpla\_ d1g2912 d4a82a2 g1f2t.1 d2d62a1  
d3tuic1 d2bbsa1 d3g60a3 d2ixea\_ d1g6ha\_ d1sgwa1 d2qi9c\_ d3rlfa1  
d3b60a1 d3d31a2 d2pzea1 g1xew.1 d1jj7a\_ d2onka1 d1wlwa\_ d1iwea\_  
d1qf5a\_ d1vmaa2 d1nija1 d2p67a1 d3ihla\_ d1okkd2 d1ls1a2 d1slma2

d1iona\_ d2v40a\_ d1dj3a\_ d3hida\_ d2vo1a1 d2g0ta1 d1vcoa2 d1j8mf2  
d1g3qa\_ d1xjca\_ d1p9ba\_ d1qzxa3 d1ihua2 d1ihua1 d2qm8a\_ d1dj2a\_  
d4ioja\_ d1cp2a\_ d1yrba2 d1hyqa\_ d3gqba2 d1skye3 d1xp8a1 d1tf7a2  
d1tf7a1 d1ye8a1 d1skyb3 d2qe7d2 d4blta\_ d4huta\_ d3l1daa2 d4hyya\_  
d2i3ba1 d1cr1a\_ d3j9tb2 d3ntua2 d1vdza1 d2z43a\_ d1e9ra\_ d1nlfa\_  
d3ziaa2 d1n0wa\_ d3ziad2 d3j9ta2 d1pzna2 d3gqbb2 d2i49a\_ d1nnfa\_  
d1xvxa\_ d1ursa\_ d1h3da1 d1iuda\_ d4m1va1 d1twya\_ d3e13x\_ d2nxoa1  
d4pfua\_ d3ttma\_ d1elja\_ d2qmwa1 d1us5a\_ d1y3na1 d1jeta\_ d1uqwa\_  
d4f19a1 d2esna2 d3thia\_ d3fasa1 d2uyeb\_ d2xwva1 d1r9la\_ d2fyia1  
d1pb7a\_ d2ozza1 d1sw5a\_ d1nh8a1 d1vr5a1 d2g29a\_ d1xs5a\_ d3lswa\_  
d2z23a\_ d3w9va\_ d3tcha\_ d1q35a\_ d1z7me1 d3q27a\_ d1p99a\_ d1ve4a1  
d2i6ea1 d4mcoa1 d4n8ya\_ d1eu8a\_ d1zbma1 d1hsla\_ d1ixca2 d1j1na\_  
d1xvya\_ d1y9ua\_ d2z22a1 d1xoca1 d4oera\_ d1wdna\_ d5f1qa1 d1xt8a1  
d1i6aa\_ d4gwoa\_ d4igta1 d1pc3a\_ d4mmpa1 d1o63a\_ d2cz1a1 d2onsa2  
d4mija1 d1eh3a\_ d3skpa\_ d1dtza1 d1dtza2 d1ieja\_ d1jnfa2 d1ce2a1  
d1jnfa1 d1b1xa2 d1b1xa1 d1jw1a1 d1jw1a2 d1ryoa\_ d1h76a1 d1h76a2  
d1c4oa1 d2p6ra3 d2p6ra4 d1oywa3 d1wrba1 d1w36b2 d1w36b1 d1c4oa2  
d3bora\_ d1t6na\_ d2eyqa5 d2eyqa3 d2eyqa2 d2zu6a2 d1veca\_ d1uaaa1  
d1w36d1 d2g9na1 d1z3ix2 d2rb4a\_ d1hv8a1 d1hv8a2 d1t5ia\_ d1w36c2  
d2j0sa2 d2j0sa1 d1fuka\_ d3hjha1 d1z5za1 d1qdea\_ d1z63a1 d1s2ma2  
d1s2ma1 d1wp9a1 d1wp9a2 d1gm5a3 d1gm5a4 d3dina4 d3dina3 d1q0ua\_  
d1w36c1 d1z3ix1 d1nkta3 d1nkta4 d1uaaa2 d1w36d2 g1qhh.1 d2fwra2  
d2fwra1 d3q3ma\_ d1za0a1 d1mxra\_ d2inca\_ d1jk0a\_ d2incb\_ d1mhyb\_  
d3hf1b\_ d1mtyb\_ d2uw1a\_ d1mhyd\_ d3n37a\_ d1afra\_ d1oquc\_ d1syya\_  
d1mtyd\_ d2o1za\_ d1uzra\_ d1smsa\_ d2fkza\_ d1zuja1 d1s3qa1 d2fjca1  
d1z6om1 d1veia\_ d4dyya\_ d3gvya\_ d2pyba\_ d4cy9a1 d3bvfa1 d1r03a\_  
d2cf7a\_ d1nf4a\_ d1zs3a1 d4iwka\_ d3ka8a\_ d3np0x\_ d1n1qa\_ d1lb3a\_  
d4e6ka\_ d1z6oa1 d2fzfa1 d4dyua\_ d3ge4a\_ d1jgca\_ d4am4a\_ d2z6ma\_  
d1ji5a\_ d1vlga\_ d1lkoa1 d1krqa\_ d3qz3a\_ d1o9ra\_ d2ffxj\_ d1euma\_  
d1yv1a1 d2v2pa\_ d1j30a\_ d4di0a\_ d1dpsa\_ d1oewa\_ d2qzxa\_ d2asia\_  
d1psoe\_ d1miqa\_ d1smra\_ d2h6ta\_ d1pfza\_ d1lizda\_ d3hd8a\_ d1j71a\_  
d1dpja\_ d4aa9a\_ d1t6ex\_ g1b5f.1 g1lya.1 g1htr.1 d1qdma2 d1bxoa\_  
d1wkra\_ d1tzsa\_ d1libqa\_ d2qzwa\_ d1ex4a2 d1bdqa\_ d3ggta\_ d3ixoa\_  
d1mrxa\_ d2haha\_ d1tw7a\_ d4njsa\_ d1sgua\_ d2p3da\_ d1nsoa\_ d3d3ta\_  
d2rkfa\_ d1c6ya\_ d3ogpa\_ d3ekwa\_ d2o4na\_ d2j9ja\_ d1baia\_ d3ggua\_  
d3lzua\_ d4npua\_ d4j55a\_ d2r8na\_ d2fxda\_ d2p3ca\_ d4dqa\_ d3ttpa\_  
d3t3ca\_ d2p3aa\_ d2hc0a\_ d2fdda\_ d3mwsa\_ d1k8rb\_ d1wgra1 d1ef5a\_  
d1wfyal d1e8ya3 d1wgya1 d1lfda\_ d2cs4a1 d1wxma1 d2byeal d3kh0a1  
d2byfa1 d1wxaa1 d1e7ua3 d1h4ra3 d4yl8a1 d2a16a3 d1wgda1 d1wggal  
d4q5eb\_ d1wjna1 d1se9a\_ d3n3kb\_ d1wz0a1 d1we6a1 d2m0xa\_ d2gbka\_  
d3rt3b1 d1wh3a1 d1sifa\_ d2ekek2 d4ii2b1 d4hk2a1 d1c3ta\_ d1m94a\_  
d1wgha1 d1ttna1 d1j8ca\_ d1wx8a1 d3v6cb1 d2ma9b\_ d4i6lb1 d1bt0a\_  
d2jvca1 d1iyfa\_ d2k1fa\_ d1wxva1 d1wf9a1 d1t0ya\_ d2io0b2 d1x1ma1  
d2gbma\_ d1zw7a1 d2m17a\_ d1ud7a\_ d1we7a1 d2lwpa\_ d2gbja\_ d1wjua1

d1v6ea1 d1v86a1 d4eewa\_ dlwiaa1 d4icva\_ d4gu2a\_ dlwx7a1 d1wy8a1  
d4hjka1 d2faza1 d1v5oa1 d3ruib\_ d3waob\_ d2r2qa1 d3m95a\_ d3wana\_  
d1lepwa1 d4lu0a\_ d1of8a\_ d3unda1 d3e9aa1 d1vr6a2 d1n8fa\_ d2qkfa\_  
d1d9ea\_ d1wioa4 d1ccza2 d1vcaa1 d1dr9a2 d1ic1a1 d2d9qb1 d2nxyb2  
d1adqa1 d1fnga1 d1uvqb1 d1zs8a1 d2vola1 d2vola2 d1mfb12 d2jelh2  
d1uwe12 d3qq4b1 d1kjob\_ d1k5na1 d1osph2 d4odh12 d1ow0a1 d1ow0a2  
d1bfob2 d3l9ra2 d3jtth1 d2fath2 d4elkb2 d1fn4b2 d2xfxb\_ d1pg7x2  
d1cqka\_ d4k71b2 d1lk2a1 d1eapb2 d4lfhg2 d1i4fa1 d2nw2a2 d1kfah2  
d1mhca1 d1h3ua1 d1wejh2 d1h0db2 d1a5fh2 d1kcvh2 d1mjuh2 d1qqda1  
d1kcrh2 d1k8ia1 d3huja2 d2nnab1 d1nfd2 d3mffb2 d1s9va1 d1lk3h2  
d1q0xl2 d1fv1b1 d1neza1 d4rfeb2 d1r3ha1 d1a6tb2 d1kjva1 d1pz5b2  
d1onqa1 d2bc4a2 d1de4a1 d1k8da1 d1tcra2 d1dn0b2 d1nfde2 d2xwtb2  
d1bfoa2 d1mexh2 d1iakb1 d1ypzf2 d4f7ea2 d1q72l2 d2fbjh2 d1fe8h2  
d1clzh2 d1fngb1 d1uvqa1 d1vgka1 d1c16a1 d4j12a2 d4x99b2 d1igtb3  
d1je6a1 d1q72h2 d1nldh2 d1teth2 d2hmic2 d1ilca2 d1ilca1 d1k8ib1  
d1q0yh2 d1kfal2 d3frua1 d1pg7w2 d1u58a1 d1igyb4 d1igyb3 d1hyrc1  
d1klub1 d1deeb2 d1c12b2 d2bc4b2 d2ig2h2 d1kcv12 d3wn5b1 d1lk2b\_  
d1lk3l2 d1mju12 d1sm3h2 d1q0xh2 d1zvsal d1ydpal d1u8ib2 d1ypze2  
d1kcuh2 d2l17a\_ d1n4na\_ d2m8bb1 d2kyqa\_ d3psma\_ d1jxca\_ d2g11a\_  
d1ugla\_ d4uj0a\_ d2k4ua\_ d1hp2a\_ d2lu9a\_ d1baha\_ d2meoa1 d1wm7a\_  
d1hlya\_ d1n8ma\_ d1j1za\_ d1wpda\_ d1c55a\_ d1pvza\_ d1wt7a\_ d1rjia\_  
d1wz5a\_ d1m2sa\_ d1pjva\_ d1c49a\_ d1qkya\_ d2ktca1 d1wmta\_ d1du9a\_  
d1j5ja\_ d1r1ga\_ d1t0za\_ d2i61a\_ d1t1ta\_ d1sn4a\_ d1kv0a\_ d2lkba\_  
d1npia\_ d1wwna\_ d1pe4a\_ d2kbka\_ d2li7a\_ d1djta\_ d2kbha\_ d1dq7a\_  
d1sega\_ d1omya\_ d1zywa1 d1jzaa\_ d1n9wa1 d1bbua1 d1e1oa1 d1c0aa1  
d1b8aa1 d1l0wa1 d3a74a1 d1eova1 d1iyjb4 d1iyjb5 d1iyjb3 d1o7ia\_  
d4ipca1 d1x3ea\_ d4apva\_ d1jb7a1 d1jb7a2 d1jb7a3 d3kdfa\_ d1ue1b\_  
d1wjja1 d3eiva\_ d1xjva2 d1xjva1 d2ccza2 d1se8a\_ d1l1loc\_ d1jb7b\_  
d1qvca\_ d3ulla\_ d1qzga\_ d1miua4 d1miua5 d1miua3 d3g48a1 d1gd7a\_  
d1mkha\_ d1jjcb3 d1y14b1 d2nn6i1 d1i94l\_ d2zjra2 d1smxa\_ d2qamc2  
d1hh2p1 d2r7da1 d1r12a2 d1wfga1 d3bzka4 d1x6oa2 d3a0ja\_ d2j01d2  
d2ja9a1 d4q15a\_ d1hr0w\_ d1luza\_ d2n3sa\_ d2vnud1 d1h95a\_ d1go3e1  
d2nn6h1 d1ne3a\_ d2mo1a\_ d1liz6a2 d1jjga\_ d1e3pa2 d2ix0a3 d2ix0a2  
d2lxja\_ d1ueba3 d1ueba2 d2z0sa1 d1u0la1 d2ix0a1 d2eifa2 d2je6i1  
d3i2za1 d2c35b1 d2ahob2 d1t9ha1 d3i4oa\_ d2qall1 d1jt8a\_ d2nn6g1  
d1g6pa\_ d3cama\_ d1i94q\_ d1c9oa\_ d1d7qa\_ d2ba0a1 d2vnud2 d2vnud3  
d1khia2 d2qalq1 d1wi5a1 d1xtda2 d2shpa1 d1yfoa\_ d1l8ka\_ d2ooqa1  
d1g4us2 d1p15a\_ d1lara2 d1lara1 d1wcha\_ d2fh7a2 d2fh7a1 d1ohea1  
d1ohea2 d2f4da\_ d1rxda\_ d2hxpa\_ d1xria\_ d1d5ra2 d1fpza\_ d3ezza\_  
d4y2ea\_ d1i9sa\_ d3azya\_ d3wvja\_ d1upsa1 d1ajoa\_ d2hyka\_ d2vy0a\_  
d1o4ya\_ d3o5sa\_ d3d6ea\_ d3atga\_ d1dypa\_ d1umza\_ d3i4ia\_ d1c11a\_  
d4lbqa\_ d1a78a\_ d1slta\_ d4no4a\_ d3zsja\_ d3duia\_ d1g86a\_ d1is3a\_  
d1qmja\_ d1hlca\_ d1tdha3 d1q3ba3 d1k82a3 g1qmo.1 g1len.1 d3zyra\_  
d1fnya\_ d1n47a\_ g21tn.1 d1avba\_ d3usua\_ d1dhkb\_ d1f9ka\_ d1ukga\_



d1g8wa\_ d1g9fa\_ d3wcsa\_ d1g7ya\_ g1loe.1 d1mvqa\_ d1hq1a\_ d1v6ia\_  
d1dbna\_ d1qnwa\_ d1fx5a\_ d4l8qa\_ d1ioaa\_ d3n35a\_ d3ubra\_ d1qo8a1  
d1d4ca1 d2k3va\_ d1ft5a\_ d1qdba\_ d1m1qa\_ d2j7aa\_ d1h21a\_ d1ogyb\_  
d4fasa\_ d1jnia\_ d1sp3a\_ d3h33a\_ d1rwja\_ d19hca\_ d1os6a\_ d3bxua\_  
d3h4na\_ d1i77a\_ d3caoa\_ d1j0pa\_ d2ctha\_ d1duwa\_ d1ofwa\_ d2e84a\_  
d1hh5a\_ d3h34a\_ d1dszb\_ d1a6ya\_ d3cbba\_ d1ynwa1 d1r4ia\_ d1hcqa\_  
d2hana\_ d2hanb\_ d2enval d1kb4b\_ d2n11b\_ d1lola\_ d1cita\_ d2dara2  
d2dara1 d1wyha2 d2dloa2 d1rutx4 d1rutx3 d2cuqa2 d1x41a2 d1x41a1  
d1x3ha2 d1x3ha1 d2d8za1 d1x61a2 d1x6aa1 d1x6aa2 d2cora2 d2cora1  
d1v6ga1 d1v6ga2 d2d8za2 d1x64a1 d1x64a2 d1b8ta1 d2co8a1 d1x63a2  
d2dj7a2 d2dj7a1 d2cu8a2 d2cu8a1 d1g47a2 d1g47a1 d1j2oa1 d1wyha1  
d2dloa1 d1wiga1 d1wiga2 d2cupa2 d2cupa3 d1x68a1 d2d8ya2 d2d8ya1  
d1m3va2 d1x62a1 d1x68a2 d1x61a1 d1b8ta3 d1b8ta2 d2d8xa2 d2d8xa1  
d1x4ka1 d1x4ka2 d2cuqa1 d1m3va1 d2co8a2 d1j2oa2 d1x63a1 d2cura1  
d2cura2 d1x62a2 d1op9a\_ d1y01a1 d1letzb1 d1egj11 d2gsib1 d1nj9a1  
d4jfhdl d1aqk11 d1t2ja\_ d1lo4h1 d1zvya1 d3v4v11 d4enec1 d1kxtb\_  
d5e8ea1 d2pxya\_ d4weud\_ d1xiwc\_ d2esvd1 d1qnzh\_ dlogae1 d1f4xh1  
d4n1hb\_ d3ezjb1 d3mlw11 d1kfah1 d1letza1 d1b4jh1 d3cfic\_ d4w68a\_  
d2arja1 d1ek3a\_ d2ok011 d1vera\_ d1uwgh1 d1blnb1 d1fpth1 d1rzga1  
d2giya1 d4m3kb1 d1nc2a1 d2nyyd1 d1ncna\_ d1fbih1 d5dxwa\_ d4fqqa1  
d1dqdhl d1jfq11 d1kelh1 d1faih1 d1frgl1 d1figl1 d4m6n11 d1fo0a\_  
d4hxb11 d3b5ga\_ d3quyd1 d2h9gb1 d1i8kb\_ d2dd8h1 d2ck0h1 d1eaja\_  
d4w6wb1 d2a6ib3 d1t66d1 d2e27h\_ d1ob1b1 d1f11b1 d2v7na1 d1ad0a1  
d2xt1b1 d1pskh1 d4i13b1 d2op411 d1a0q11 d1uwell1 d1za3a1 d1ncb11  
d4uu9a\_ d1bm3h1 d1cloh1 d1nqba2 d1cf8h1 d4y5va\_ d1mhph1 d5anma1  
d4cdgc1 d4ldeb\_ d1y01b1 d2pcpb1 d1z3gl1 d1dfb11 d1fh5h1 d3g5xa1  
d1tzib1 d4dn311 d3zhka1 d2b1hh1 d2uylal d1f3dh1 d1nj9b1 d2agjh1  
d2h1pl1 d1q72h1 d8fabbl d1ndmb1 d1rjca1 d4u6hb1 d3upca\_ d2fbj11  
d1osph1 d1tvda\_ d2cjev\_ d4fhbd1 d1bd2d1 d1rz7h1 d3nn8a\_ d1blna1  
d1knoa1 d1nfda1 d2bmkbl d1dq11\_ d1igyb1 d1igfl1 d12e8h1 d3utza1  
d1nc2b1 d1rihh1 d4mwfb1 d4jvpa1 d1mieh1 d1rhfa1 d1fgn11 d1sbsh1  
d1lp9e1 d1dn0a1 d4lqf11 d1iaih1 d1kgcd1 d1mh5b1 d1gpol1 d2g60h3  
d1f8t11 d2jixd1 d4grwh\_ d1fo0b\_ d1bfob1 d1axsa1 d1u9ka\_ d1nmbh\_  
d1h8na1 d1h8na2 d1jguh1 d4eura1 d3sdy11 d35c8h1 d1w7211 d1mvub\_  
d1i9rh1 d1ob1a1 d4wenb\_ d1yeeh1 d3ietc1 d1f58h1 d1ad0b1 d1mqkl\_  
d1nbvh1 d4b50a\_ d3r8bb\_ d1baf11 d1mamh1 d4rgne1 d2gsgb\_ d35c811  
d1bafh1 d1aih1 d2pcpa1 d2fath1 d2x1pa\_ d1orsb1 d1libgl1 d1shma\_  
d1a2yb\_ d1u0qa\_ d2coqa\_ d1hilb1 d1qfwi\_ d1jv5b\_ d1fn4b1 d5e0qa\_  
d1nsnh1 d1plgl1 d4ocxl1 d1kb5h1 d1rzfh1 d1pg7x1 d2fx7h1 d2oi9c\_  
d1l7i11 d3eyva1 d1d5i11 d4ffyl\_ d1tet11 d1a6wh\_ d1ac6a\_ d3dvfa\_  
d1nfde1 d1mimh1 d1ri8a1 d1jhlh\_ d3dura\_ d1fskb1 d1f97a1 d3so3b1  
d2ak4d1 d1lp9f1 d4z7wf1 d1l7th1 d4y5ya\_ d4x7ec1 d1emth1 d1ikfl1  
d1nlbh1 d4utal1 d1bjma1 d1eapb1 d1u6ah1 d2dtgd1 d1kj2b\_ d1xeda1  
d1cleh1 d1fgvh\_ d2bnub1 d2fb4h1 d2dtgb1 d1ktrh\_ d1jpth1 d1qkz11

d4hepg\_ d2atpb1 d1flrh1 d2hrpl1 d1mvfa\_ dliaim1 d3k80a1 d2jb5h1  
d3zkxc\_ d4grwe\_ d1it9h1 d1rhhb1 d3w9ec\_ d1e4wh1 d1sy6h1 d2j6eh1  
d3qxta\_ d1jglh1 d1p7ka1 d1tzhb1 d4n8pa1 d1gaf11 d2jelh1 d1wioa2  
d4i0cc1 d1cicb1 d1lmka2 d1lmka1 d1iqwh1 d1orqb1 d1ejoh1 d1jnlh1  
d4zga\_ d43c9b\_ d1ggbl1 d1wejh1 d3q6fa1 d1f3dj1 d3c6la1 d1bqlh1  
d3p9wb\_ d1a3r11 d1h0db1 d2uzil\_ d1eo811 d1qfw1\_ d1n7ml1 d1igja1  
d1c5ch1 d2a9mh\_ d1rmfh1 d1fj1b1 d4heme\_ d1ccza1 d1a5fh1 d1ogad1  
d1dlfh\_ d1qa9b\_ d1vgel1 d3qskb\_ d1sjxa\_ d4ozfg1 d1sq2n\_ d1qd0a\_  
d1kcvh1 d1c5db1 d3qcull1 d3bn9d1 d1mjuh1 d4y8dc\_ d7fabh1 d3dvgb1  
d1l0011 d1a6tb1 d1gigh1 d1kcrh1 d2hwz11 d1yjdc1 d3clfl1 d4krna\_  
d1dl7l\_ d1e6o11 d1mexh1 d3r0ma\_ d4kkna\_ d1fnsl1 d1oaqh\_ d1rzia1  
d1ucbh1 d1ncw11 d4b41a\_ d1nfdfl1 d2mpah1 d2d7t11 d4grwf\_ d4b5ea\_  
d1l3k3h1 d3u79a\_ d4u3xa\_ d1ghfl1 d1bvkb\_ d1mcw11 d1b88a\_ d1jrhh1  
d32c2b1 d4wemb\_ d1dsfh\_ d1op3h1 d1ce111 d1iqda1 d1qoka1 d1qoka2  
d1qfuh1 d2crya1 d1ay1h1 d1oaql\_ d3ab0b\_ d1rur11 d1t4kb1 d1bz7b1  
d1n0xh1 d1for11 d1ucbl1 d4w6yb\_ d43c9a\_ d2aab11 d1tzia1 d4n1ca\_  
d1k6qh1 d3g9ab\_ d4tvsa1 d1lghm\_ d1pz5b1 d3dx9a1 d3wxwh\_ d1nakh1  
d1kcul1 d3eaka\_ d4qlra1 d1cr911 d1d9ka\_ d1f4x11 d1deea1 d2i27n2  
d1c12a1 d2orbl1 d1j8hd1 d1mcph1 d1c5da1 d1kenh1 d1bd2e1 d1h5ba\_  
d4x7fc1 d3upaa\_ d1t3fa1 d1indh1 d2dtgc1 d4hc111 d1zv5a1 d4wgvb\_  
d1uwgl1 d4f37k1 d1aqkh1 d1vesa\_ d3zkqd\_ d1fpt11 d1l0411 d1knob1  
d3rrqa\_ d1ct8b1 d4orz\_ d1mlbb1 d4hgkc1 d1dqd11 d1bogb1 d4ozhe1  
d1dr9a1 d1i7za1 d1dn0b1 d1kell1 d1rzib1 d1ypzf1 d1wtla\_ d1hkfa\_  
d1fail1 d1figh1 d2vyre\_ d1sjva\_ d1ohqa\_ d1bfoa1 d1pkqb1 d1mjul1  
d1b4jl1 d1nsl1 d2arjb1 d1p4bh\_ d4aj0a\_ d3nn8b\_ d2rcja1 d1f2xk\_  
d4v1dd\_ d1adqh1 d2eksa\_ d4k3ga\_ d1jfqh1 d1uweh1 d1frgh1 d4gftb\_  
d1uz8b1 d4n1ea\_ d1bm311 d1cl011 d3mcka1 d2vq1a1 d1ae6h1 d4aq1b1  
d1uj3b1 d1nbqa1 d1fh511 d2ck011 d2ywza\_ d1q7211 d4nxbx\_ d1hila1  
d4hz1b1 d2j8811 d1zmya1 d1cd0a\_ d1a4ka1 d1psk11 d1a0qh1 d4krmb\_  
d1ncbh1 d2fbjh1 d1j8he1 d1i3ua\_ d1cf811 d1fe8h1 d2plya1 d1eeqa\_  
d2x89a\_ d1o10a\_ d2r01h1 d1ub5a1 d1dfbh1 d3eyvb1 d4jdvb1 d4p2cg\_  
d2gsia1 d2agj11 d1u3ha1 d2h1ph1 d1rih11 d1fskc1 d1boga1 d2a7711  
d1osp11 d1qfoa\_ d3dwta\_ d2fx711 d1rz711 d3stba1 d1pkqa1 d1b6da1  
d1dzba2 d1dzba1 d1kj2a\_ d4l1ha\_ d1rzgb1 d1dqlh\_ d12e811 d1mie11  
d1jmaa\_ d1sbs11 d1fgnh1 d1f5811 d1mqkh\_ d1ndgb1 d3qegl1 d1ia111  
d2aw2a1 d1tqbc1 d3fo2a1 d4dkaa\_ d1f8th1 d2g6011 d2ywy\_ d1uj3a1  
d1yc7a\_ d3bd3a\_ d4w6xb1 d1nmb1\_ d1i8ka\_ d1rjlb1 d1ypze1 d1p7kb1  
d1kxqe\_ d1gpoh1 d2z4qa1 d1w72h1 d1i9r11 d4qgya1 d4xt1c\_ d2qqnh1  
d1cica1 d3c08h1 d2cd0a\_ d2bdnh1 d1hnga1 d1mam11 d1nldh1 d1cr9h1  
d4lcih1 d3bkyh1 d3qg711 d1ai111 d1kxvc\_ d4iosd\_ d1l7ih1 d2x1qa\_  
d1ub6b1 d3k74b\_ d1libgh1 d1teth1 d1igya1 d1hxma1 d2x6ma\_ d2e71a\_  
d5e03a\_ d1qfwm\_ d2r0kh1 d1igjb1 d1rurh1 d1plgh1 d1mj8h1 d1yuhb1  
d3fmg11 d1rzfl1 d1emt11 d1ad9b1 d1igtb1 d1nlb11 d1d5ih1 d3k7ua\_  
d4ffyh\_ d1bwva\_ d3dvga1 d1a6ta1 d1fgvl\_ d4qxgl1 d1mim11 d1jhl1\_

d2hffb1 d2hh011 d1qkzh1 d1l7t11 d1afvh1 dliaii1 d2cjuh\_ d1um5h1  
d2ghwb2 d2ghwb1 d1kgce1 d2fgwh1 dlikfh1 d1dvfd\_ d2i24n1 d2xtjb\_  
d1za3b1 d2yc1a\_ d2hh0h1 d2x1oa\_ d1bvka\_ d1rjla1 d5e7ba1 d1igta1  
d1i11b1 d2fb411 d1mvua\_ d1jpt11 d32c2a1 d1fvca\_ d1iqdb1 d2hrph1  
d2p4ab\_ d4qo1a\_ d1p2cb1 d1wt5c\_ d1t4ka1 d5c1mb\_ d1it9l1 d1bz7a1  
d1b2wh1 d1e4w11 d1jn111 d1yedb1 d1za6b1 d3u7aa\_ d1igfh1 d3gnml1  
d1orsa1 d1wejl1 d1a2ya\_ d1hxmb1 d1gafh1 d2j4wh1 d1pz5a1 d1j05a\_  
d1a3rh1 d4fq111 d1qfwh\_ d1eo8h1 d1n7mh1 d4s11a\_ d1kegh1 d5da4a\_  
d1iqw11 d3whxb1 d1vgeh1 d1deeb1 d1c12b1 d1t2q11 d1ad9a1 d3gsnb1  
d3b2uc1 d1ggbh1 d1t3fb1 d1nak11 d4ocmc\_ d1lila1 d2v7hb3 d2esve1  
d1mcoh1 d2qr0b1 d2q3aa\_ d1ct8a1 d1kcr11 d2pxyb\_ d2uzih\_ d5c3ld\_  
d3durb\_ d1c5c11 d2ak4e1 d1d17h\_ d1xiwd\_ d1mlba1 d1rmfl1 d1i7zb1  
d1dlf1\_ d2xa3a\_ d5bq7b1 d1dqqb1 d3h4211 d1egjh1 d1kcv11 d1fe811  
d2j6e11 d1f3rb2 d11k311 d1sm3h1 d1q0xh1 d1ghfh1 d7fab11 d1igch1  
d1lo0h1 d4idla\_ d5c2b1\_ d1jrh11 d1i11a1 d3zhda1 d4kfzc\_ d1b0wa\_  
d1e6oh1 d1mex11 d4krpb\_ d1fnsh1 d1ncwh1 d4hgma\_ d4eigb1 d4rzca\_  
d2mpa11 d4y5xa\_ d5en2b1 d3lrga1 d4ej1c1 d1rhha1 d1j05b\_ d1forh1  
d1q9wb1 d2wzpd\_ d2aq2a1 d1h0da1 d3revb1 d2ij0c1 d1tzha1 d4m7j11  
d1k6q11 d3b9kc1 d1igml\_ d3qeua1 d1dsfl\_ d1celh1 d1kcu11 d1zvha1  
d1zvoa1 d1tqbb1 d1ay111 d2qscl1 d2cgrh1 d1n10h1 d1ken11 d3eo0a1  
d4n9ob1 d1n0x11 d3k1kc\_ d2aq2b1 d1ck1a1 d1enfa1 d1i4pa1 d1v1oa1  
d1et9a1 d1esfa1 d2g9hd1 d4ohja1 d1klud1 d1bxta1 d1eu3a1 d1ty0a1  
d2cqva1 d2k1ma\_ d2d12a1 d1biha3 d1biha1 d1biha4 d3qp3a1 d1g1ca\_  
d1gxea\_ d1cvsc2 d1cvsc1 d1xmwa2 d1m4ka2 d2otpa2 d1biha2 d1rhfa2  
d2fcba2 d2fcba1 d1wwbx\_ d1gsma2 d1lepfa1 d1lepfa2 d2dava1 d1waaa\_  
d1f97a2 d1x44a1 d1vcaa2 d1fnla2 d1fnla1 d3b5ha2 d3h8na2 d3h8na1  
d1jbj1a1 d1jbj2a1 d1pd6a\_ d1f2qa2 d1f2qa1 d3cx2a\_ d1nbqa2 d3b5ha1  
d1n26a1 d1xiwb\_ d1xaua\_ d1fltx\_ d2ifga1 d1olla1 d1olla2 d1cs6a4  
d1cs6a3 d1cs6a2 d1cs6a1 d2gw5a2 d1sy6a1 d1xiwa\_ d1lucta2 d1lucta1  
d1ry7b2 d1gl4b\_ d1qz1a3 d1olza1 d2c9aa1 d1wwca\_

**Family-13 (a.39.1.2)**

**Positive dataset contains 9 protein sequences.**

d2y5ia\_ d3n22a\_ d2egda\_ d4ggfc\_ d2wcea\_ d2luca\_ d4aqia\_ d3nsia\_  
d2lp3a\_

**Negative dataset contains 3965 protein sequences.**

d1orva2 d1xfda2 d1m32a\_ d1libja\_ d1iuga\_ d4q75a\_ d2bkwa1 d1t3ia\_  
d1n8pa\_ d1qz9a\_ d1jf9a\_ d1eg5a\_ d1p3wa\_ d3kgwa\_ d1cl1a\_ d2ctza1  
d1vjoa\_ d2rfva\_ d1gc0a\_ d1cs1a\_ d1d2fa\_ d2ch1a1 d1qgna\_ d1pffa\_  
d1elua\_ d1u08a\_ d1lc5a\_ d2ay1a\_ d1bw0a\_ d3pd6a\_ d7aata\_ d2csta\_  
d1j32a\_ d1fg7a\_ d4wlha\_ d1o4sa\_ d1v2da\_ d1gdea\_ d1m6sa\_ d1v72a1  
d1svva\_ d1ajsa\_ d1wsta1 d2f8ja2 d11k9a\_ d1vp4a1 d1xi9a1 d2gb3a1  
d1yaaa\_ d3i2ka1 d1mpxa2 d1xkta1 d2hfka\_ d1jmkc\_ d5d3ka\_ d2cfba1  
d1dfoa\_ d1o69a\_ d1bj4a\_ d3k28a\_ d2bwpa\_ d3lg0a\_ d2fnua\_ d3ou5a\_  
d1z7da1 d1b9ha\_ d1iaya\_ d4msoa\_ d1bs0a\_ d1s0aa\_ d1sffa\_ d3tqxa\_

d1mdoa\_ d3qboa\_ d3pgya\_ d2dkja\_ d1ejia\_ d1vefa1 d4wxga\_ d3bs8a\_  
d3gbxa1 d1w23a\_ d1i26a\_ d3lgia\_ d3i77a\_ d2z9ia2 d4nsva\_ d1lcya2  
d4jcna\_ d1os8a\_ d1hpga\_ d1p3ca\_ d1l1ja\_ d1qtfa\_ d1cixa\_ d1y29a\_  
d1v7fa\_ d2jtba\_ d1d1ha\_ d1g9pa\_ d1lupa\_ d1qk7a\_ d1mb6a\_ d2a2va\_  
d1niya\_ d1i25a\_ d1hvwa\_ d2mpqa\_ d1ie6a\_ d1kqha\_ d1la4a\_ d2mxoa1  
d1d10a\_ d1koza\_ d1qk6a\_ d1emxa\_ d1c6wa\_ d1f56a\_ d1bypa\_ d1azca\_  
d1ws8a\_ d3u25a\_ d1cuoa\_ d1id2a\_ d1rkra\_ d2iaac\_ d4dp1x\_ d1nwpa\_  
d2gima\_ d2i7sa\_ d1qhqa\_ d3ehbb1 d1fftb1 d1gyca3 d1hfua2 d1kbva1  
d1kbva2 d1sdda1 d1sdda2 d1gyca1 d1gyca2 d1mzya1 d2bw4a1 d1aoza1  
d1aoza3 d1aoza2 d1kyaa3 d1kyaa1 d1mzya2 d4e9sa1 d1sddb1 d1sddb2  
d1hfua1 d1hfua3 d1oe1a2 d1oe1a1 d1v10a2 d1v10a3 d1v10a1 g1f8v.1  
d1novc\_ d2bbvc\_ d3sxwa1 d1j3qa\_ d4luka\_ d1a3qa1 d1iknc\_ d3brda1  
d1p7h11 d1imhc1 d1gjia1 d1zk9a1 d2cxka1 d2bema\_ d1pama1 d1lea9c1  
d1qhoa1 d2fhfa2 d2fhfa1 d1k3ia1 d1j0ha1 d1cxla1 d2bhua1 d1ledqa1  
d1f1sa2 d1ut9a2 d1gvia1 d1txka1 d1adqa1 d1fnga1 d1uvqb1 d1zs8a1  
d2vola1 d2vola2 d1mfb12 d2jelh2 d1uwel2 d3qq4b1 d1kjbv\_ d1k5na1  
d1osph2 d4odh12 d1ow0a1 d1ow0a2 d1bfob2 d3l9ra2 d3jtth1 d2fath2  
d4elkb2 d1fn4b2 d2xfxb\_ d1pg7x2 d1cqka\_ d4k71b2 d1lk2a1 d1leapb2  
d4lfhg2 d1i4fa1 d2nw2a2 d1kfah2 d1mhca1 d1h3ua1 d1wejh2 d1h0db2  
d1a5fh2 d1kcvh2 d1mjuh2 d1qqda1 d1kcrh2 d1k8ia1 d3huja2 d2nnab1  
d1nfd2 d3mffb2 d1s9va1 d1lk3h2 d1q0x12 d1fv1b1 d1neza1 d4rfeb2  
d1r3ha1 d1a6tb2 d1kjva1 d1pz5b2 d1onqa1 d2bc4a2 d1de4a1 d1k8da1  
d1tcra2 d1dn0b2 d1nfd2 d2xwtb2 d1bfoa2 d1mexh2 d1iakb1 d1ypzf2  
d4f7ea2 d1q7212 d2fbjh2 d1fe8h2 d1clzh2 d1fngb1 d1uvqa1 d1vgka1  
d1c16a1 d4j12a2 d4x99b2 d1igtb3 d1je6a1 d1q72h2 d1nldh2 d1teth2  
d2hmic2 d1i1ca2 d1i1ca1 d1k8ib1 d1q0yh2 d1kfa12 d3frua1 d1pg7w2  
d1u58a1 d1igyb4 d1igyb3 d1hyrc1 d1klub1 d1deeb2 d1c12b2 d2bc4b2  
d2ig2h2 d1kcv12 d3wn5b1 d1lk2b\_ d1lk312 d1mjul2 d1sm3h2 d1q0xh2  
d1zvsal d1ydpal d1u8ib2 d1ypze2 d1kcuh2 d4alac\_ d1rera1 d1s6na\_  
d3uzqb\_ d1jgta2 d1ofda3 d1ea0a3 d1ecfa2 d1ct9a2 d1ao0a2 d1te5a\_  
d1ep0a\_ d2pa7a1 d1wlta1 d1nxma\_ d2c0za1 d1ds6b\_ d1fstb\_ d4mh8a\_  
d1mu2a2 d4i7ga1 d1tafa\_ d1bh9b\_ d1jfib\_ d1q9ca\_ d1h3ob\_ d2byka1  
d1n1ja\_ d4g92b\_ d1bh9a\_ d1jfia\_ d1h3oa\_ d2bykb1 d1n1jb\_ d2bjca1  
d2hsga1 d1qpza1 d1efaa1 d1r0ka3 d1j5pa3 d1vkoa2 d1vm6a2 d3qvsal  
d1p1ja2 d2ovga\_ d1sq8a\_ d1rzsa\_ d3kz3a\_ d3gpdg2 d2q49a2 d1hdgo2  
d2g17a2 d2cvoa2 d2czca1 d3pwka2 d1obfo2 d1i32a2 d1zyao2 d2pkqo2  
d1b7go2 d2hjsa2 d1cf2o2 d1vkna2 d1nvm2 d2msya\_ d2djoa1 d2r5za\_  
d1au7a1 d1f43a\_ d2lmda1 d1akhb\_ d1s7ea1 d3nara\_ d1zq3p1 d2craa1  
d1mija\_ d4uuta\_ d3a01a\_ d1x58a1 d3rkqa1 d3cmya1 d2cqa1 d2da6a1  
d1e3oc1 d1fjla\_ d1mh3a1 d1ig7a\_ d1x41a1 d1wh7a1 d1gt0c1 d2mw8a\_  
d1lfup\_ d1x2ma1 d1b72a\_ d1wi3a1 d1jgga\_ d1wjha1 d1x2na1 d1mnmc\_  
d2cuea1 d3k2aa\_ d2hosa\_ d2jwta2 d1pufa\_ d1oetc1 d2hi3a\_ d1b8ia\_  
d4j19a\_ d3lnqa\_ d1wh5a1 d1b8ib\_ d1fexa\_ d2cgra1 d1guua\_ d1ug2a1  
d2cqqa1 d2ajea1 d4a69c\_ d1h8ac1 d2crga1 d2iw5b1 d1xc5a1 d2cu7a1

d1wgxa1 d2cjja1 d2ckxa1 d1gvda\_ d1hcra\_ d1gdta1 d1u78a2 d6paxa2  
d1k78a1 d1k78a2 d1hlva1 d1iufa2 d1iufa1 d1igna2 d2iu5a1 d1zk8a1  
d2g7sa1 d2fd5a1 d2np5a1 d1z0xa1 d2id6a1 d2d6ya1 d2i10a1 d1vi0a1  
d2oi8a1 d3c07a1 d2ns7a1 d2fq4a1 d2yvea1 d1t33a1 d2o7ta1 d1rhta1  
d2np3b1 d2g7ga1 d2gena1 d2fbqa1 d2g7la1 d2gfna1 d2g3ba1 d2jj7a1  
d2hyja1 d1sgma1 d1ui5a1 d2hkua1 d2id3a1 d4jyka1 d1bl0a1 d1d5ya1  
d1d5ya2 d3lv8a\_ d1s3ga1 d1zakal d1s4qa\_ d3tvta2 d1uf9a\_ d1khta\_  
d1ckea\_ d1osna\_ d1p5zb\_ d4tmka\_ d3cm0a\_ d1tmka\_ d1jaga\_ d3h86a\_  
d1t0hb\_ d1nn5a\_ d2h92a\_ d3kb2a1 d2c95a1 d1yj5a2 d1kgda\_ d1ly1a\_  
d2ak3a1 d1vyva2 d1deka\_ d2grja1 d1p3ja1 d1y63a\_ d1e4ya1 d1s96a\_  
d3iija1 d1lvga\_ d1nksa\_ d1vyua2 d4e22a\_ d1qf9a\_ d1jjva\_ d1q3ta\_  
d1ki9a\_ d1lw7a2 d1teva\_ d1kjwa2 d2iyva2 d1viaa\_ d1e6ca\_ d1g3ma\_  
d1t8ta1 d1nsta\_ d1fmja\_ d1zrha\_ d1ls6a\_ d2a3ra\_ d1aqua\_ d2zptx\_  
d3ckla\_ d1texa\_ d1q44a\_ d2gwha\_ d1odfa\_ d4gi7a\_ d2jeoa1 d1rz3a\_  
d1z0ja1 d3umra2 d3gj0a1 d2gaoa1 d1yzga1 d1x3sa1 d1g7sa4 d1puja\_  
d1udxa2 d1kk1a3 d2o52a\_ d1jwyb\_ d1zcaa2 d1zcba2 d2fv8a1 d2cjwa\_  
d3dz8a1 d1xzpa2 d1vg8a\_ d4qxaa\_ d2ew1a1 d1x1ra1 d2bcgy\_ d3doea1  
d3cona\_ d3rega\_ d3wyga\_ d1upta\_ d2b6ha1 d1zd9a1 d1lnza2 d1r5ba3  
d1n0ua2 d1r2qa\_ d2f91a1 d2rhda\_ d3q3jb\_ d3q85a\_ d1efma1 d1r8qa\_  
d2gf9a1 d2akab1 d1ek0a\_ d1z08a1 d2gcoa1 d2dy1a2 d4g01b\_ d2cxxa1  
d1svia\_ d3q72a\_ d1ni3a1 d4ac9a4 d2erxa1 d2bmea\_ d1wxqa1 d2gf0a1  
d4ldja1 d1zunb3 d1d5ca\_ d4lv5b\_ d1efca3 d1kmqa\_ d2g6ba1 d3lrpa\_  
d1tada2 d2y8ea\_ d4rd4a1 d1z06a1 d2heia\_ d3a58b\_ d1u01a2 d1d2ea3  
d1zj6a1 d2ocba\_ d3rwoa\_ d1mr3f\_ d2e9sa1 d4u5xa1 d2iwra\_ d2fn4a1  
d3bwdd\_ d2nzja1 d2atva1 d2ksqa\_ d3l43a\_ d1mkya2 d1mkya1 d1wmsa\_  
d1jnva3 d2rmka\_ d1f6ba\_ d1f60a3 d1gota2 d1jala1 d2fh5b1 d1g16a\_  
d2wblc\_ d1m7ba\_ d1wf3a1 d1f5na2 d1t9ha2 d1z6xa1 d1z0aa1 d2fg5a1  
d2a5ja1 d2bcjq2 d1s0ua3 d1ky3a\_ d4y0va\_ d4lhwa\_ d2qmea1 d2atxa1  
d1egaa1 d1ryha\_ d1moza\_ d1nrjb\_ d2erya1 d3bfka\_ d1puia\_ d3j3az1  
d3t5ga\_ d1shza2 d3defa\_ d2f7sa1 d3raba\_ d3tsoa\_ d3aq4a\_ d2a17a1  
d3sfva1 d3bc1a\_ d2ncda\_ d1sdma\_ d3h4sa1 d2heha\_ d2grya\_ g3kin.1  
d1kk8a2 d1br2a2 d1f9va\_ d2mysa2 d1lkxa\_ d3t0qa\_ d4db1a1 d3gbja\_  
d1ry6a\_ d1v8ka\_ d1k8ka2 d1k8ka1 d3uleb1 d3i33a2 d3i33a1 d1bupa1  
d1dkgd2 d1dkgd1 d4ci6a2 d1jcfa1 d4a2ba2 d2fxua1 d1yaga2 d1yaga1  
d4cbua2 d1bupa2 d3vrda1 d3vrda2 d1fcdc2 d1fcdc1 d1h1oa2 d1h1oa1  
d1m70a1 d1liqca2 d1liqca1 d1eb7a2 d1eb7a1 d1nmla1 d1nira1 d1qksa1  
d3h1jd1 d1hroa\_ d4gedb\_ d3zooa\_ d1mz4a\_ d1gu2a\_ d1f1fa\_ d1dvva\_  
d1c6ra\_ d1c75a\_ d1e29a\_ d1gdva\_ d1cnoa\_ d1h32b\_ d2bh4x\_ d2aiua\_  
d5cytr\_ d1jdl1a\_ d1i8oa\_ d2zboa\_ d3dmia\_ d1ls9a\_ d1wvec\_ d2yk3a\_  
d3ph2b\_ d1dw0a\_ d5aura\_ d1ql3a\_ d1qn2a\_ d1flca\_ d4zzva\_ d2xspa\_  
d1leg1a\_ d4v20a\_ d4ipma1 d1gpia\_ d4csia\_ d3pfza\_ d3ovwa\_ d2yoka\_  
d2nqya\_ d1h4ga\_ d1oa2a\_ d1olra\_ d3b7ma\_ d4h7ma1 d3wp3a\_ d2vgda\_  
d1ligoa\_ d3zsea\_ d2nlra\_ d3wx5a\_ d1oa3a\_ d1pvxa\_ d1m4wa\_ d1f5ja\_  
d1oa4a\_ d1ks5a\_ d4ixla1 d3sita1 d1h32a2 d1evsa\_ d1cnt1\_ d1pvhb\_

d1z7ca\_ d1huwa\_ d1bgea\_ d1rhga\_ d1f6fa\_ d1f45b\_ d1i1rb\_ d1axia\_  
d1etea\_ d3tgxb\_ d2z3qa1 d3qbl1a\_ d1hula\_ d1m48a\_ d4nkqb\_ d1eera\_  
d1v7mv\_ d5e4ea\_ d2o27a\_ d3b5ka\_ d2psma1 d4zf7a\_ d3uf5a\_ d4x51a\_  
d1d9ca\_ d4ypgc1 d3oq3a\_ d1lqsl\_ d1n1fa\_ d1au1a\_ d1wu3i\_ d3bes1\_  
d3ux9a\_ d1v8fa\_ d2ejca\_ d3muea1 d3q12a1 d4dnxa2 d1m8pa2 d1g8fa2  
d1jhda2 d1x6va2 d3rbaa\_ d2qtra\_ d1nupa\_ d3l92a\_ d1f9aa\_ d1qjca\_  
d2h29a\_ d1vlha\_ d1od6a\_ d1lw7a1 d1mrza2 d4ruka\_ d2e17a\_ d1liq0a2  
d1irxa2 d1r6ta2 d1ivsa4 d2cyba\_ d1rqga2 d1j09a2 d2yxna\_ d1f7ua2  
d1h3fa1 d1ffya3 d2g36a1 d1nzja\_ d1jila\_ d1n3la\_ d1pfva2 d1h3na3  
d3n9ia\_ d3sz3a1 d1cmxa\_ d1xd3a\_ d3ifwa\_ d3sw2a\_ d1moxc\_ d1dx5i3  
d1edmb\_ d1autl2 d1autl1 d1nqlb\_ d1dval1 d1szba2 d1kigl\_ d2y5fl\_  
d1ijqa2 d1gk5a\_ d1g1sa2 d1nt0a3 d1xdtr\_ d1lmja2 d1lmja1 d1nzia2  
d2wphe\_ d1klil\_ d1pfxl2 d1pfxl1 d1p9ja\_ d1g1ta2 d1f7ea\_ d4yzub\_  
d1s5ja2 d1qhta2 d4dlea2 d1tgoa2 d3py8a2 d1q8ia2 d2py5a2 d1d5aa2  
d1sfsa\_ d1jfxa\_ d1wkya2 d1uuqa\_ d3wh9a\_ d4m1ra\_ d4xuya\_ d2je8a5  
d4bf7a1 d3cuia\_ d1ur4a\_ d1qw9a2 d1odza\_ d2vzsa5 d1bqca\_ d2x2ya1  
d1hjqa\_ d1qnra\_ d4y7ea1 d1vjza\_ d4k68a\_ d2v3ga\_ d4hpga\_ d1nofa2  
d1nq6a\_ d1h4pa\_ d1aq0a\_ d3ziza\_ d4bs0a\_ d1ecea\_ d1hl1na\_ d1ta3b\_  
d1w91a2 d1ilwa\_ d1uhva2 d1us3a2 d1legza\_ d7a3ha\_ d1tvna1 d3nyda1  
d1ghsa\_ d2cyga1 d4xv0a\_ d2c8na2 d1w32a\_ d3emca\_ d1v6ya1 d1foba\_  
d2uwfa1 d2fgla\_ d3niya1 d2c0ha1 d1rh9a1 d1yq2a5 d1szna2 d1fa2a\_  
d1pama4 d5do8a1 d1ea9c3 d1hx0a2 d2fhfa5 d1qhoa4 d1avaa2 d1m53a2  
d4m8ua1 d2gjpa2 d1lwha2 d4howa1 d1ktba2 d1j0ha3 d3vm5a1 d2x1ia\_  
d1wzaa2 d1uasa2 d2diea1 d1mxga2 d1ht6a2 d1eswa\_ d1liv8a2 d5cpsa\_  
d1ud2a2 d1zjaa1 d3gbea1 d1kwga2 d1wdpa\_ d1gcya2 d1g5aa2 d1hvxa2  
d3dhp2a2 d2bhua3 d4do4a1 d3qgva1 d1e43a2 d1g94a2 d2d3na2 d1gjwa2  
d1gvia3 d1x1na1 d1r7aa2 d1tz7a1 d2x42a1 d1tr9a1 d3abza1 d4toqa\_  
d1wb0a1 d1w9pa1 d1eoka\_ d1litxa1 d1kfwa1 d1goia2 d1ledqa2 d2gsja\_  
d1hjxa1 d1jnda1 d1vf8a1 d3wdpp1 d3wq5a\_ d4gxpa\_ d4hz8a\_ d1e4mm\_  
d3aiua\_ d1wcga1 d1qvba\_ d3ahxa\_ d1v02a\_ d2dga\_ d1pbga\_ d1vffa1  
d1qoxa\_ d4ha4a\_ d3syxa1 d1mkea1 d2p8va\_ d1xoda1 d1i7aa\_ d1evha\_  
d1qc6a\_ d1egxa\_ d2v76a\_ d1wj1a1 d1aqca\_ d1qqga2 d1qqga1 d1n3ha\_  
d4dbba\_ d3f0wa1 d1p3ra\_ d1wgua1 d2cy4a1 d3hqca\_ d1wvha1 d1xr0b1  
d3nvva1 d1krha3 d2h88b1 d1t3qa2 d1kf6b2 d1zoyb1 d1jq4a\_ d1ffva2  
d1dgja2 d1rm6c2 d1h6ta1 d9ldta1 d2ewda3 d1up7a1 d2dfda1 d1s6ya1  
d1vjta1 d7mdha1 d1hyea1 d1t2da1 d1ojsa3 d1b8pa1 d1hyha1 d1civa1  
d2a92a1 d1ez4a1 d1i0za1 d1y6ja1 d1gv0a1 d1ur5a1 d1l1lda1 d1lobba1  
d1v8ba1 d1gdha1 d1l17da1 d2dlda1 d1mx3a1 d1ygya1 d1qp8a1 d1j4aa1  
d2naca1 d1npya1 d3t4ea2 d1a4ia1 d1o0sa1 d2hk9a2 d2egga2 d1b26a1  
d1bvua1 d1gq2a1 d1c1da1 d1leha1 d1gtma1 d1euza1 d1nvtal d3dona2  
d1ledza1 d1gpja2 d1vi2a1 d1p77a1 d1nyta1 d1b0aa1 d1vl6a1 d1v91a1  
d1txga2 d3f47a1 d1mv8a2 d2pv7a2 d1xc2a3 d2ahra2 d4xiya1 d2f1ka2  
d1pgja2 d1i36a2 d1np3a2 d1lj8a4 d1teaa3 d1qmga2 d2i76a2 d2g5ca2  
d1wdka3 d1dlja2 d3cuma3 d1kola2 d1f8fa2 d1qora2 d1jqba2 d1vj0a2

d1cdoa2 d1gu7a2 d1d1ta2 d1xa0a2 d2dm6a2 d1jvba2 d1rjwa2 d1h2ba2  
d1tt7a2 d1piwa2 d1o89a2 d1liz0a2 d1e3ja2 d1yb5a2 d1uufa2 d1vj1a2  
d1e3ia2 d3gpdg1 d1vc2a1 d2nvwa1 d1u8fo1 d1ydwa1 d1hdgo1 d2g17a1  
d1cf2o1 d2czca2 d1r0ka2 d1obfo1 d2cvoa1 d1ebfa1 d1h6da1 d1i32a1  
d1zh8a1 d2q49a1 d1qkia1 d1j5pa4 d3pzra1 d1xeea1 d1vkoa1 d1vm6a3  
d3qvsa1 d2pkqo1 d1gr0a1 d1p1ja1 d1lc0a1 d1j0xo1 d3pwka1 d2hjsa1  
d1zyao1 d1vkna1 d1t1ta1 d1nvmb1 d3sjua\_ d3ojfa1 d1xu9a1 d2jjya1  
d1n7ha\_ d1y1pa1 d1h5qa\_ d1jtva\_ d4fs3a\_ d2bkaa1 d1gy8a\_ d2c5aa1  
d1ulsa\_ d1ooea\_ d2b69a1 d1y5ma1 d1spxa\_ d1aela\_ d1bxka\_ d1ydea1  
d1gega\_ d1hdoa\_ d1e6ua\_ d1snya1 d2rhca\_ d3zv4a\_ d5ceja\_ d2d1ya1  
d1fjha\_ d3w8ea\_ d2fmua1 d1x1ta\_ d1rpna\_ d3ay7a1 d1k2wa\_ d1eq2a\_  
d2hrba1 d3ruaa\_ d2ew8a1 d4hwka\_ d1xgka\_ d2bd0a1 d1yo6a1 d2a35a1  
d2ntva\_ d1vl8a\_ d1hdca\_ d4bkua\_ d2ag5a1 d2q45a\_ d1nffa\_ d4iy1a\_  
d1zbqa1 d1kewa\_ d1ek6a\_ d1ja9a\_ d2q46a2 d1iy8a\_ d1cyda\_ d2ptga\_  
d1hxha\_ d1uzma1 d3lyla\_ d4m89a\_ d3wyea\_ d2b1la1 d1w6ua\_ d1sb8a\_  
d2q2va\_ d4nr0a\_ d1e6wa\_ d2gasa\_ d3oiga1 d2bgka1 d1mxha\_ d1vl0a1  
d1rkxa\_ d1r6da\_ d1wmaa1 d1e7wa\_ d2c07a1 d1xkqa\_ d3tzha\_ d1g0oa\_  
d3lz6a\_ d1qyca\_ d1ledoa\_ d1gz6a\_ d1loc2a\_ d1t2aa\_ d1zema1 d2xoxa\_  
d1z45a2 d1geea\_ d1p33a\_ d3lt0a\_ d4e6pa\_ d2wyua\_ d1db3a\_ d4q9na\_  
d1xhla\_ d4o1ma\_ d1fmca\_ d2uvda\_ d2gdza1 d1uaya\_ d2z1ma\_ d2o23a2  
d2fr1a2 d2fr1a1 d1qsga\_ d1qyda\_ d4zjua\_ d2a4ka1 d1yb1a\_ d1wvga1  
d1yxma1 d3f4ba\_ d1mg5a\_ d1xg5a1 d1r55a1 d3gboa\_ d1atla\_ d1buda\_  
d4q1la\_ d1quaa\_ d1yp1a\_ d1wnia\_ d1e2ta\_ d4c5pa\_ d2bsza1 d4bgfa\_  
d1w4ta1 d1g0da4 d2f4ma1 d1x3za\_ d1mdwa\_ d1qxpa4 d1ziva1 d1zcmal  
d3ioqa\_ d1fh0a\_ d1o0ea\_ d1m6da\_ d2cb5a\_ d1cs8a\_ g8pch.1 d1s4va\_  
d2pnsa\_ d1vsna1 d1mira\_ d1liwda\_ d2oula\_ d7pcka\_ d3bwka\_ d3bcna\_  
d2p86a\_ d1pvja\_ d1pcia\_ d1gece\_ d1deua\_ d4bs6a\_ d1xkga1 d1cqda\_  
d1jqpa2 d2c0ya\_ d2bdza\_ d3p5ua\_ d2o36a\_ d1k9xa\_ d1zoya1 d1d4ca2  
d1chua2 d1jnra2 d1kf6a2 d2jk6a2 d2jk6a1 d1feca1 d1feca2 d1lpfa1  
d1lpfa2 d1xhca1 d1xhca2 d1dx1a2 d1dx1a1 d1gera2 d1m6ia2 d1onfa1  
d1onfa2 d3lada2 d3lada1 d1w4xa1 d1w4xa2 d1gesa2 d1mo9a1 d1xdia1  
d1fl2a2 d1fl2a1 d1fcda1 d1fcda2 d1h6va1 d1mo9a2 d1gv4a2 d1gv4a1  
d2gv8a2 d2gv8a1 d1aoga1 d1aoga2 d1hyua1 d1ebda1 d1ebda2 d3dk9a1  
d1q1ra2 d1q1ra1 d1gesa1 d1zbfal d2z1ha\_ d2etja1 d3qioa1 d1j11a\_  
d2e41a\_ d1j12a\_ d2lsna1 d1io2a\_ d1uaxa\_ d2yv0x\_ d1mu2a1 d1ekea\_  
d1i39a\_ d1pn0a1 d1reoal d1ju2a1 d2f5va1 d3c96a1 d2gmha1 d1pj5a2  
d1gpea1 d1o5wa1 d1n4wa1 d1k0ia1 d2dw4a2 d2ivda1 d1seza1 d2voua1  
d1kdga1 d1s5ja1 d2hbja2 d2igia\_ d1wlja\_ d1qhta1 d4dlea1 d1tgoa1  
d2f96a1 d3tr8a1 d3mxma\_ d1q8ia1 d1y97a1 d1w0ha\_ d1kfsa1 d2py5a1  
d1noya\_ d1d5aa1 d1yt3a3 d2guia\_ d3mwpa1 d4kb1a\_ d1iv0a\_ d1nu0a\_  
d2d5ra1 d1js9c\_ d1f15b\_ d1za7a\_ d1laja\_ d3ljqa\_ g1k2x.1 d1b9ra\_  
d1offa\_ d1frra\_ d3wcqa\_ d1e9ma\_ d1wria\_ d1i7ha\_ d3av8a\_ d1czpa\_  
d1rfka\_ d3p1ma1 d3b2ga\_ d2bt6a2 d1jmx4 d1jmx3 d1pbya3 d1r7ha\_  
d1faaa\_ d1wika1 d1xfla\_ d1ttza1 d2f51a1 d1ti3a\_ d1nhoa\_ d1sena\_

d2i4aa\_ d1ep7a\_ d1zmaa1 d1fo5a\_ d3lefa1 d3diea1 d2yana1 d1z6na1  
d1oaza\_ d3zywa1 d4aj8a\_ d1nm3a1 d4fiwa\_ d1wmja\_ d4hs1a1 d1liloa\_  
d1xwaa1 d1wjka1 d2vm1a\_ d1fb6a\_ d1gh2a\_ d1h75a\_ d1nw2a\_ d1kx5b\_  
d3a6na\_ d4m6ba2 d2nqbd\_ d3wkjd\_ d2yfwe\_ d4h9na\_ d5bnxa\_ d1kx5c\_  
d3r45a\_ d1eqzb\_ d4jjnb\_ d1f66c\_ d1eqza\_ d4wnnb\_ d1kx5a\_ d1u35c1  
d1id3a\_ d2nqbc\_ d1kx5d\_ d2b5ea2 d2b5ea3 d2b5ea1 d2b5ea4 d2kp1a1  
d2kp2a1 d1hyua3 d1hyua4 d1j08a1 d1j08a2 d1pd212 d1nhya2 d2a2ra2  
d1k0dd2 d1f2ea2 d1gsua2 d1f3ba2 d2fhea2 d2pvqa1 d1tw9a2 d1oyja2  
d1e6ba2 d1k0ma2 d3ik7a1 d4is0a1 d1jlva2 d1m0ua2 d3gtub2 d1z9ha2  
d1okta2 d1axda2 d2gsra2 d1tu7a2 d1k3ya2 d1zgma1 d1b48a2 d1gnwa2  
d1gwca2 d2gsta2 d1glqa2 d1oe8a2 d1pn9a2 d1v2aa2 d1fw1a2 d1duga2  
d1ig8a1 d1czan2 d1czan3 d1czan1 d1ig8a2 d1czan4 d1bg3a4 d1bg3a3  
d1bg3a2 d1qusa\_ d1sefa\_ d1sfna\_ d1rc6a\_ d1qqya\_ d1gd6a\_ d1f6ra\_  
d1ivma\_ d2gv0a\_ d1iiza\_ d2z2fa\_ d1j8xa\_ d1ghla\_ d1b9oa\_ d1741a\_  
d1691a\_ d2o4wa\_ d1p37a\_ d1k28a3 d1xjta1 d1jtma\_ d2f2qa\_ d4e97a1  
d1g4ma1 d1g4ma2 d2pjsa1 d2i7ra1 d1ecea\_ d1xqaa1 d5cj3a1 d1npba\_  
d1jifa\_ d2p7oa\_ d1r9ca\_ d1nkia\_ d1mpya2 d1kw3b2 d1kw3b1 d4ghga1  
d1tfza1 d3isqa1 d3isqa2 d1sqia1 d1sqia2 d1lkda2 d1lkda1 d1mpya1  
d1cjxa2 d1cjxa1 d1sp9b2 d1t47a1 d1t47a2 d1f1ua2 d1sp8a1 d1sp8a2  
d1pv8a\_ d1w5qa\_ d2c1ha\_ d1ohla\_ d1l6sa\_ d1qsta\_ d2beia1 d4m3sa\_  
d1u6ma1 d1ygha\_ d1yk3a1 d3dr6a\_ d1xmta\_ d1z4ea1 d2ge3a1 d1bo4a\_  
d2fiaa1 d2jdca1 d1y9wa1 d3to7a\_ d1wwza1 d2fl4a1 d2ozua1 d2b5ga\_  
d2cy2a1 d2p0wa\_ d1cm0a\_ d4pswa\_ d1yrea1 d1yr0a1 d1m4ia\_ d2gana1  
d1yvka1 d1ghea\_ d2g3aa1 d1y7ra1 d2euia1 d1q2ya\_ d2fsra1 d1xeba\_  
d2ae6a1 d1qsma\_ d2aj6a1 d1y9ka1 d1i12a\_ d1vkca\_ d2atra1 d1n71a\_  
d2d4pa1 d2fiwa1 d2fe7a1 d1tiqa1 d2ou2a\_ d1yx0a1 d2fcka1 d1p0ha\_  
d2j8ma\_ d2pq8a\_ d1z4ra1 d1s3za1 d1ufha\_ d1c4qa\_ d1prtc1 d2wv6d\_  
d1prtf\_ d1l1trd\_ d4l63b1 d1r4pb\_ d1prtd\_ d1tl0f\_ d2bosa\_ d1prtb1  
d3chbd\_ d1xvqa1 d1pn0a2 d3hy2a\_ d2cvba1 d1o8xa\_ d1lu4a\_ d1we0a1  
d2bmxal d2a4va1 d1psqa\_ d1xiya1 d1q98a\_ d1n8ja\_ d1zofa1 d2ggta\_  
d3tjja\_ d4je1a1 d1o73a\_ d3s9fa\_ d2zcta\_ d1qmva\_ d2b1ka\_ d5dvba1  
d2b5xa1 d2v2ga\_ d1st9a\_ d3tb2a\_ d4llra\_ d4fh8a1 d1e2ya\_ d1knga\_  
d2h30a\_ d1i5ga\_ d2z9sa\_ d2f8aa1 d1tp9a1 d2b7ka\_ d1nm3a2 d3hvva\_  
d2wfca1 d4kcea\_ d1xvwa1 d4gqca1 d3qpmma\_ d4k1fa\_ d1zzoa1 d1gpla\_  
d1prxa\_ d4od7a1 d1z6ma1 d4mcua1 d4dvca1 d3l9sa\_ d1un2a\_ d3rppa\_  
d1zsqal d1f74a\_ d3l21a\_ d2e1da\_ d1to3a1 d1w3ia\_ d1sfla\_ d1n7ka\_  
d1vcva1 d4imea\_ d1wa3a\_ d2ocza1 d1f2ja\_ d3m16a\_ d2yxga\_ d3a5fa\_  
d1fbaa\_ d1l6wa\_ d1xfba1 d1wx0a1 d1vpxa1 d1ojxa\_ d1mxsa\_ d2a4aa1  
d1xkya1 d3cq0a1 d3s1xa\_ d1f05a\_ d1fdja\_ d3cpra1 d4d2ja\_ d2phla2  
d2phla1 d1fxza2 d1fxza1 d1lrha\_ d1uija1 g1dgw.1 d2v09a\_ d1uika2  
d1uika1 d1dgwa\_ d1e88a1 d1l6ja5 d1l6ja4 d1eaka4 d1eaka3 d1l6ja3  
d1h8pa2 d1h8pa1 d1etha2 d1w52x1 d2ppla1 d1hpla2 d1lpbb2 d2oxea1  
d1bu8a2 d1rp1a2 d1ys1x\_ d4hs9a\_ d1ex9a\_ d1ku0a\_ d3qmma\_ d2h1ia1  
d2r8ba1 d3b5ea1 d3cn9a\_ d1lgya\_ d4l3wa\_ d1gz7a\_ d1lukca\_ d2hqya1



d2hqya2 d11rza2 d11rza3 d1ne9a2 d1cr6a2 dlixra2 d3groa\_ d1pjaa\_  
d1thta\_ d1ra6a\_ d1muka\_ d3gsza\_ d1khva\_ d1te9a\_ d2xwha\_ d3uqsa\_  
d3hkwa\_ d3n6ma\_ d2cjqa\_ d2xyma\_ d1teba\_ d1te8a\_ d1s48a\_ d1u09a1  
d4wfxa\_ d3tyqa\_ d2pgga1 d3zxha\_ d1rm8a\_ d1leaka2 d1hy7a\_ d2jsda\_  
d1cxva\_ d1hv5a\_ d1i76a\_ d3p0ya1 d1igra1 d1igra2 d1n8yc1 d1m6ba2  
d1m6ba1 d1dzka\_ d4tlja\_ d2a2ua\_ d4wfva\_ d3t1da\_ d4iaxa\_ d3zq3a\_  
d2nnda\_ d1i4ua\_ d1kxoa\_ d1bbpa\_ d1kt7a\_ d1exsa\_ d3s26a1 d1qfta\_  
d4gh7a\_ d1z24a1 d1qabe\_ d1xkia\_ d1lew3a\_ d3bx7a\_ d4iawa1 d1n0sa\_  
d1gkab\_ d3kzaa\_ d2k23a\_ d2l9ca1 d2joza1 d1gm6a\_ d3kffa\_ d3saoa1  
d1e5pa\_ d1yupa1 d1iiua\_ d2tbvc\_ d1c8nc\_ d1x36a\_ d1smvc\_ d1ng0c\_  
d4sbvc\_ d1f2nc\_ d1ddla\_ d1e57b\_ d1rmka\_ d1ixta\_ d1eyoa\_ d1cnna\_  
d1fu3a\_ d1g1pa\_ d1f3ka\_ d1fyga\_ d1rypd\_ d1irua\_ d1rypc\_ d3unfk\_  
d1rypa\_ d1j2pa\_ d1irui\_ d1j2qh\_ d3unfh\_ d1m4ya\_ d1rypb\_ d1lirul\_  
d1lirug\_ d1liru2\_ d1q5rh\_ d1rypg\_ d1g3ka\_ d1liruf\_ d1q5qa\_ d1e94a\_  
d1lirub\_ d1ryph\_ d3ty6a\_ d1liruj\_ d1liruk\_ d1rype\_ d1lirud\_ d1lirue\_  
d3mi01\_ d1rypf\_ d1liruh\_ d2z3ba\_ d3mka2\_ d1liru1\_ d1mqta\_ d1d4m3\_  
d1fmd3\_ d2mev1\_ g1aym.1 d1ev13\_ d4q4w1\_ d1rla3\_ d2x5ia\_ d1rhi1\_  
g1r1a.1 g1d4m.1 g1rhi.1 d1b35b\_ d1loopa\_ d1tme1\_ d4iv1a\_ g1pvc.1  
g1fpn.1 d1fpn1\_ d4gb31\_ d1d4m1\_ d1fmd1\_ d1ev11\_ d2wzr3\_ g1cov.1  
d1qqp3\_ g1fmd.1 d2x5ic\_ d1rhi3\_ g1oop.1 d1hxs1\_ g1hxs.1 d1fpn3\_  
d1bev1\_ g2mev.1 d1eah3\_ d1aym1\_ d1qqp1\_ d1zba3\_ d1h8ta\_ d3vbhc\_  
g1b35.1 g1bev.1 d1hxs3\_ g1ev1.1 d1bev3\_ g1tmf.1 d1tmf1\_ d1b35a\_  
d2mev3\_ g1eah.1 g1h8t.1 d1eah1\_ d4q4w3\_ d1rla1\_ d1aym3\_ d1pvc1\_  
d1zba1\_ d1h8tc\_ d1loopc\_ d1tme3\_ g1qqp.1 d4iv1c\_ g1tme.1 d3ubub\_  
d1legia\_ d1v7pa\_ d1tdqb\_ d3ubua\_ d1c3ab\_ d1h8ua\_ d3bx4b\_ d1t8ca1  
d1sb2a1 d1qdda\_ d2ziba1 d3cada\_ d1byfa\_ d1j34b\_ d1jwia\_ d1jzna\_  
d1c3aa\_ d1oz7b\_ d1wmza\_ d3bdwb\_ d1hq8a\_ d1fifa1 d1dv8a\_ d3hupa\_  
d1wk1a1 d1umra\_ d2afpa\_ d3bx4a\_ d1gz2a\_ d1sl6a\_ d1v7pb\_ d3g8ka\_  
d1ixxa\_ d1j34a\_ d1jwib\_ d1g1sa1 d1y17a1 d1ja3a\_ d1fvub\_ d3bdwa\_  
d1sb2b1 d1fvua\_ d1umrc\_ d1oz7a\_ d4m17a\_ d3cfwa1 d1ypqa1 d1g1ta1  
d3fd4a\_ d3l9jc\_ d4dn8a1 d1v41b\_ d1rdl1\_ d2msba\_ d1eixa\_ d3exra\_  
d2ffca1 d2fdsa1 d3n3ma1 d2czda\_ d1q6oa\_ d2yyua\_ d1vqta1 d1dbta\_  
d3ldva1 d2flia1 d1h1ya\_ d1tqja\_ d1tqxa\_ d4lt9a1 d3tc7a1 d3hoja\_  
d1i4na\_ d3vnda\_ d3n18a1 d1geqa\_ d3naval d4a2ra1 d3tc6a1 d1ujpa\_  
d4ijba\_ d1xcfa\_ d1vc4a\_ d1rd5a\_ d1qopa\_ d3b5va\_ d2r80b\_ d1cqxa1  
d1cg5a\_ d1gcvb\_ d3boma\_ d2h8fb\_ d2raoa\_ d3bj1a\_ d4hrrb\_ d2r50a\_  
d3d1kb\_ d2aa1b1 d3zhwa\_ d3hf4b\_ d3gdja\_ d1jebb\_ d3bj1b\_ d1x9fb\_  
d1wmub\_ d1gcva\_ d3bcqb\_ d3d4xb\_ d1gvha1 d2dc3a\_ d3hf4a\_ d4yu3a\_  
d3k8ba\_ d1qpwb\_ d2r80a\_ d3bcqa\_ d1v4wa\_ d3wtgb\_ d1j17a\_ d4esaa\_  
d1a9we\_ d3d1ab\_ d1fsla\_ d4h21a\_ d1v4wb\_ d1mwca\_ d1vhba\_ d1jeba\_  
d1spgb\_ d1h97a\_ d1q1fa\_ d1tu9a1 d3d1aa\_ d1hdsb\_ d3hyub\_ d2zfb\_ b\_  
d3fs4a\_ d1oj6a\_ d1shrb\_ d4h21b\_ d4yu3b\_ d1spga\_ d3hrwa\_ d3qqra\_  
d3at5a\_ d4wchd\_ d3hyua\_ d1cg5b\_ d1uc3a\_ d1hbra\_ d2raob\_ d1outb\_  
d4esab\_ d3gdjb\_ d3qqqa\_ d1x9fc\_ d3vrfa\_ d1itha\_ d3mkba\_ d3d4xa\_

d3mjpa\_ d1jl6a\_ d3fh9a\_ dlouta\_ d2dc3b\_ dlit2a\_ d3eoka\_ d3g46a\_  
d1qpwa\_ d3vrfb\_ d1ch4a\_ d1x9fd\_ d1hdsa\_ d2zfba\_ d3mkbb\_ dlora4a\_  
d3wtga\_ d1a4fa\_ d3fh9b\_ d3bomb\_ d3cy5a\_ d3at5b\_ d1x9fa\_ d2oifa\_  
d4lmbx\_ d1cpcb\_ d3v57a\_ d1kn1a\_ d1cpca\_ d4f0ta\_ d2vjha\_ d4po5b\_  
d1alla\_ d4f0tb\_ d1b33b\_ d1b8db\_ d4h0mb\_ d1b33a\_ d2vjhb\_ d4lm6b\_  
d2vmlb\_ d1a11b\_ d2vjta\_ d3dbja\_ d2vmla\_ d2vjtb\_ d4f0ub\_ d1f99b\_  
d4rmpa1 d1liaa\_ d1eyxb\_ d2uulb\_ d4lmsb\_ d4f0ua\_ d2bv8a\_ d1f99a\_  
d2bv8b\_ d2c71b\_ d3dbjb\_ d4rmpb1 d1b8da\_ d4h0ma\_ d3v57b\_ d1kn1b\_  
d1liab\_ d2uula\_ d2j96a\_ d1kyqa1 d3ia2a\_ d1a88a\_ d4dgqa1 d1zoia\_  
g1gxs.1 d1azwa\_ d1mtza\_ d2xqfa\_ d1ea5a\_ d1f6wa\_ d1qe3a\_ d1k4ya\_  
d4qwwa\_ d2ha2a\_ d3c8da2 d2pbla1 d1jkma\_ d1jjia\_ d1lzlzla\_ d2i49a\_  
d1nnfa\_ d1xvxa\_ d1ursa\_ d1h3da1 d1iuda\_ d4m1va1 d1twya\_ d3e13x\_  
d2nxoa1 d4pfua\_ d3ttma\_ d1elja\_ d2qmw1 d1us5a\_ d1y3na1 d1jeta\_  
d1uqwa\_ d4f19a1 d2esna2 d3thia\_ d3fasa1 d2uyeb\_ d2xwva1 d1r91a\_  
d2fyia1 d1pb7a\_ d2ozza1 d1sw5a\_ d1nh8a1 d1vr5a1 d2g29a\_ d1xs5a\_  
d3lswa\_ d2z23a\_ d3w9va\_ d3tcha\_ d1q35a\_ d1z7me1 d3q27a\_ d1p99a\_  
d1ve4a1 d2i6ea1 d4mcoa1 d4n8ya\_ d1eu8a\_ d1zbma1 d1hsla\_ d1lixca2  
d1jl1na\_ d1xvya\_ d1y9ua\_ d2z22a1 d1xoca1 d4oera\_ d1wdna\_ d5f1qa1  
d1xt8a1 d1i6aa\_ d4gwoa\_ d4igta1 d1pc3a\_ d4mmpa1 d1o63a\_ d2cz1a1  
d2onsa2 d4mija1 d2qvba\_ d2v9za\_ d4kafa1 d4iuua3 d4bvva\_ d5hpga\_  
d3k65a\_ d1ki0a3 d1ki0a2 d1ki0a1 d1a0ha1 d3sp8a3 d2feba1 d3ulra1  
d1g9ka2 d1kapp2 d2m5ta\_ d1cqqa\_ d1wqsa\_ d5bpea\_ d2ipha\_ d1lvoa\_  
d2bhga1 d3tnta\_ d3sjia\_ d3d23a1 d2fyqa\_ d3tloa\_ d3zvea1 d2hrva\_  
d3q3ya1 d4asha1 d1cg2a1 d1yloa2 d1y7ea2 d1y0ya3 d1lfwa1 d1vixa1  
d1fnoa4 d1vhoa2 d1ysja1 d1vhea2 d1z21a1 d2fvga2 d1vgya1 d1r3na1  
d2grea2 d1xmba1 g1q71.1 d1rtqa\_ d3rp2a\_ glucy.1 d1fuja\_ d2zchp\_  
d3w94a\_ d1si5h\_ d1lo6a\_ g2pka.1 d1cgha\_ d1kigh\_ d1a5ia\_ d3s9ba\_  
d1hj8a\_ d1ao5a\_ d2anya\_ d1q3xa1 d1gvza\_ d1azza\_ d4gsoa\_ d2f91a1  
d1iaua\_ d1gdna\_ d1eufa\_ g1fiw.1 d1eq9a\_ d4nfea\_ d2rdla\_ d1spja\_  
d1elva1 d1a7sa\_ d1ekbb\_ d1pfxc\_ d1yc0a\_ d2aiqa\_ g1fiz.1 d1fi8a\_  
d4k60a\_ d4dgja\_ d1mzaa\_ d1op0a\_ d3tjva\_ d1pytd\_ d1sgfg\_ g1gg6.1  
d2eeka\_ g1rtf.1 d1a0ja\_ d3g01a\_ d1pytc\_ d4e7na\_ d1ddja\_ d1z8ga1  
d2hlca\_ d1npma\_ g1jou.1 d1sgfa\_ d1autc\_ g2hnt.1 g1kdq.1 d1orfa\_  
d3s69a\_ d4crga\_ d1fxya\_ d1bqya\_ d2ftba\_ d1pmpa\_ d2rcqa1 d1fdqa\_  
d41kpa\_ d1sa8a\_ d1vyfa\_ d1lpja\_ d3vg7a1 d4azqa1 d1o8va\_ d5bvqa\_  
d1p6pa\_ d2qo4a\_ d1opba\_ d1yiva1 d4bvma1 d4tkba\_ d4i3ba\_ d1bwya\_  
d1ftpa\_ d1ggla\_ d4gkca\_ d1cbia\_ d3p6da1 d1kqwa\_ d2a0aa1 d1m41a\_  
d2bk7a\_ d3fjua\_ d1z5ra1 d1kwma1 d1uwya2 d1jqga1 d2c1ca1 d1dtda\_  
d2h0ba\_ d2erfa\_ d1h30a2 d1h30a1 d3mw4a1 d1pz7a\_ d2r1ba\_ d3v64a1  
d1d2sa\_ d3bopa1 d3mw3a1 d1okqa1 d1okqa2 d1e69a\_ d1mv5a\_ d3g60a4  
g1ii8.1 d1ewqa2 d1ji0a\_ d1qhla\_ d1v43a3 d2wmfa1 d1vp1a\_ d1g2912  
d4a82a2 g1f2t.1 d2d62a1 d3tuic1 d2bbsa1 d3g60a3 d2ixea\_ d1g6ha\_  
d1sgwa1 d2qi9c\_ d3r1fa1 d3b60a1 d3d31a2 d2pzea1 g1xew.1 d1jj7a\_  
d1oxxk2 d2onka1 d1w1wa\_ d3gqba2 d1skye3 d1xp8a1 d1tf7a2 d1tf7a1

d1ye8a1 d1skyb3 d2qe7d2 d4blta\_ d4huta\_ d3ldaa2 d4hyya\_ d2i3ba1  
d1crla\_ d3j9tb2 d3ntua2 d1vdza1 d2z43a\_ d1e9ra\_ d1nlfa\_ d3ziaa2  
d1n0wa\_ d1g6oa\_ d3ziad2 d3j9ta2 d1pzna2 d3gqbb2 d1gl9b1 d1gkub2  
d1eh3a\_ d3skpa\_ d1dtza1 d1dtza2 d1lieja\_ d1jnfa2 d1ce2a1 d1jnfa1  
d1b1xa1 d1jw1a1 d1jw1a2 d1ryoa\_ d1h76a1 d1h76a2 d1c4oa1 d2p6ra3  
d2p6ra4 d1oywa2 d1oywa3 d1wrba1 d1w36b2 d1w36b1 d1c4oa2 d3bora\_  
d1t6na\_ d2eyqa5 d2eyqa3 d2eyqa2 d2zu6a2 d1veca\_ d1uaaa1 d1w36d1  
d2g9na1 d1z3ix2 d2rb4a\_ d1hv8a1 d1hv8a2 d1t5ia\_ d1w36c2 d2j0sa2  
d2j0sa1 d1fuka\_ d3hjha1 d1z5za1 d1qdea\_ d1z63a1 d1s2ma2 d1s2ma1  
d1wp9a1 d1wp9a2 d1gm5a3 d1gm5a4 d3dina4 d3dina3 d1q0ua\_ d1w36c1  
d1z3ix1 d1nkta3 d1nkta4 d1uaaa2 d1w36d2 g1qhh.1 d2fwra2 d2fwra1  
d3q3ma\_ d1za0a1 d1mxra\_ d2inca\_ d1jk0a\_ d2incb\_ d1mhyb\_ d3hf1b\_  
d1mtyb\_ d1r2fa\_ d2uw1a\_ d1mhyd\_ d3n37a\_ d1afra\_ d1syya\_ d1mtyd\_  
d2olza\_ d1uzra\_ d1smsa\_ d2fkza\_ d1zuja1 d1s3qa1 d2fjca1 d1z6om1  
d1veia\_ d4dyya\_ d1jiga\_ d3gvya\_ d2pyba\_ d4cy9a1 d3bvfa1 d1r03a\_  
d2cf7a\_ d1nf4a\_ d1zs3a1 d4iwka\_ d3ka8a\_ d3np0x\_ d1nlqa\_ d1lb3a\_  
d4e6ka\_ d1z6oa1 d2fzfa1 d4dyua\_ d3ge4a\_ d1jgca\_ d4am4a\_ d2z6ma\_  
d1ji5a\_ d1vlga\_ d1lkoal d3qz3a\_ d1o9ra\_ d2ffxj\_ d1euma\_ d1yv1a1  
d2v2pa\_ d1j30a\_ d4di0a\_ d1dpsa\_ d1oewa\_ d2qzxa\_ d2asia\_ d1psoe\_  
d1smra\_ d2h6ta\_ d1pfza\_ d1izda\_ d3hd8a\_ d1j71a\_ d1dpja\_ d4aa9a\_  
d1t6ex\_ g1b5f.1 g1lya.1 g1htr.1 d1qdma2 d1bxoa\_ d1wkra\_ d1tzsa\_  
d1libqa\_ d2qzwa\_ d1ex4a2 d1c6va\_ d1k8rb\_ d1wgra1 d1ef5a\_ d1wfyal  
d1e8ya3 d1wgya1 d2cs4a1 d1wxma1 d2byeal d3kh0a1 d2byfal d1wxaa1  
d1e7ua3 g1qmo.1 g1len.1 d3zyra\_ d1fnya\_ d1n47a\_ g21tn.1 d1avba\_  
d3usua\_ d1dhkb\_ d1f9ka\_ d1lukga\_ d1g8wa\_ d1g9fa\_ d1wbfa\_ d3wcsa\_  
d1g7ya\_ g1loe.1 d1mvqa\_ d1hq1a\_ d1v6ia\_ d1dbna\_ d1qnwa\_ d1fx5a\_  
d4l8qa\_ d1ioaa\_ d3n35a\_ d1wgda1 d1wgga1 d4q5eb\_ d1wjna1 d1se9a\_  
d3n3kb\_ d1wz0a1 d1we6a1 d2m0xa\_ d2gbka\_ d3rt3b1 d1wh3a1 d1sifa\_  
d2ekek2 d4ii2b1 d4hk2a1 d1c3ta\_ d1m94a\_ d1wgha1 d1ttna1 d1j8ca\_  
d1wx8a1 d3v6cb1 d2ma9b\_ d4i6lb1 d1bt0a\_ d2jvca1 d2k1fa\_ d1wxva1  
d1wf9a1 d1t0ya\_ d2io0b2 d1x1ma1 d2gbma\_ d1zw7a1 d2m17a\_ d1ud7a\_  
d1we7a1 d2lwpa\_ d2gbja\_ d1wjua1 d1v6ea1 d1v86a1 d4eewa\_ d1wiaa1  
d4icva\_ d4gu2a\_ d1wx7a1 d1wy8a1 d4hjka1 d2faza1 d1v5oa1 d2al3a1  
d2cr5a1 d1wj4a1 d3ubra\_ d1qo8a1 d1d4ca1 d2k3va\_ d1ft5a\_ d1qdba\_  
d1m1qa\_ d2j7aa\_ d1h21a\_ d1ogyb\_ d4fasa\_ d1jnia\_ d1oaha\_ d1sp3a\_  
d1wioa4 d1ccza2 d1vcaa1 d1dr9a2 d2d9qb1 d2nxyb2 d1um8a\_ d1ixza\_  
d1qvra2 d1qvra3 d1qzma\_ d1sxjc2 d1jr3d2 d2p65a\_ d1l8qa2 d1g8pa\_  
d3hu3a3 d1sxjd2 d1njfa\_ d1in4a2 d1sxja2 d1tuea1 d2ce7a2 d1w5sa2  
d1sxjb2 d1d2na\_ d1ny5a2 d1ofha\_ d2gnoa2 d2a5yb3 d1fnna2 d1u0ja1  
d1lv7a\_ d2fnaa2 d1ixsb2 d4gita\_ d1sxje2 d1g41a\_ d1svpa\_ d1mbma\_  
d3su6a1 d1cula1 d4agka\_ d1vcpa\_ d1q31a\_ g1n11.1 d3e90b\_ d1ep5a\_  
d3u1jb\_ d2lj7a\_ d2m8bb1 d2kyqa\_ d3psma\_ d1jkza\_ d1jxca\_ d2g11a\_  
d1ug1a\_ d4uj0a\_ d2k4ua\_ d1hp2a\_ d2lu9a\_ d1baha\_ d2meoa1 d1wm7a\_  
d1hlya\_ d1n8ma\_ d1jlza\_ d1wpda\_ d1c55a\_ d1pvza\_ d1wt7a\_ d1rjia\_

d1wz5a\_ d1m2sa\_ d1pjva\_ d1c49a\_ d1qkya\_ d2ktca1 d1wmta\_ d1du9a\_  
d1j5ja\_ d1rlga\_ d1t0za\_ d2i61a\_ d1t1ta\_ d1sn4a\_ d1kv0a\_ d2lkba\_  
d1npia\_ d1wwna\_ d1pe4a\_ d2kbka\_ d2li7a\_ d1djta\_ d2kbha\_ d1dq7a\_  
d1sega\_ d1omya\_ d1zywa1 d1jzaa\_ d1n9wa1 d1bbua1 d1e1oa1 d1b8aa1  
d1l0wa1 d3a74a1 d1eova1 d1t61c1 d1iyjb4 d1iyjb5 d1iyjb3 d1o7ia\_  
d4ipca1 d1x3ea\_ d4apva\_ d1jb7a1 d1jb7a2 d1jb7a3 d3kdfa\_ d1ue1b\_  
d1wjja1 d3eiva\_ d1xjva2 d1xjva1 d2ccza2 d1se8a\_ d1l1oc\_ d1jb7b\_  
d1qvca\_ d3ulla\_ d1qzga\_ d1miua4 d1miua5 d1miua3 d3g48a1 d1gd7a\_  
d1mkha\_ d1jjcb3 d1pyba\_ d1y14b1 d2nn6i1 d1i94l\_ d2zjra2 d1smxa\_  
d2qamc2 d1hh2p1 d2r7da1 d1rl2a2 d1wfaq1 d3bzka4 d1x6oa2 d3a0ja\_  
d2j01d2 d2ja9a1 d4q15a\_ d1hr0w\_ d1luza\_ d2n3sa\_ d2vnud1 d1h95a\_  
d2nn6h1 d1ne3a\_ d2mola\_ d1iz6a2 d1jjga\_ d1e3pa2 d2ix0a3 d2ix0a2  
d2lxja\_ d1ueba3 d1ueba2 d2z0sa1 d1u0la1 d2ix0a1 d2eifa2 d2je6i1  
d3i2za1 d2c35b1 d2ahob2 d1t9ha1 d3i4oa\_ d2qall1 d1jt8a\_ d2nn6g1  
d1g6pa\_ d3cama\_ d1i94q\_ d1c9oa\_ d1d7qa\_ d2ba0a1 d2vnud2 d2vnud3  
d1khia2 d2qalq1 d1wi5a1 d1xtda2 d1ny4a\_ d1rpma\_ d2shpa1 d1yfoa\_  
d1l8ka\_ d2ooqa1 d1g4us2 d1lara2 d1lara1 d1wcha\_ d2fh7a2 d2fh7a1  
d1ohea1 d1ohea2 d2f4da\_ d1rxda\_ d2hxpa\_ d1xria\_ d1d5ra2 d3ezza\_  
d4y2ea\_ d1i9sa\_ d3azya\_ d3wvja\_ d1upsa1 d1ajoa\_ d2hyka\_ d1ajka\_  
d2vy0a\_ d1o4ya\_ d3o5sa\_ d3d6ea\_ d3atga\_ d1dypa\_ d1lumza\_ d3i4ia\_  
d1c1la\_ d4lbqa\_ d1slta\_ d4no4a\_ d3zsja\_ d3duia\_ d1g86a\_ d1is3a\_  
d1qmja\_ d1hlca\_ d1tdha3 d1q3ba3 d1k82a3 d4qmea2 d2xdta2 d1z5ha2  
d1lepwa1 d3h33a\_ d1rwja\_ d19hca\_ d1os6a\_ d3bxua\_ d3h4na\_ d1i77a\_  
d3caoa\_ d1j0pa\_ d2ctha\_ d1duwa\_ d1ofwa\_ d2e84a\_ d1hh5a\_ d3h34a\_  
d1dszb\_ d1a6ya\_ d3cbba\_ d1ynwa1 d1r4ia\_ d1hcqa\_ d2hana\_ d2hanb\_  
d2enva1 d1kb4b\_ d2n11b\_ d1lola\_ d2dara2 d2dara1 d1wyha2 d2dloa2  
d1rutx4 d1rutx3 d2cuqa2 d1x41a2 d1x41a1 d1x3ha2 d1x3ha1 d2d8za1  
d1x61a2 d1x6aa1 d1x6aa2 d2cora2 d2cora1 d1v6ga1 d1v6ga2 d2d8za2  
d1x64a1 d1x64a2 d1b8ta1 d2co8a1 d1x63a2 d2dj7a2 d2dj7a1 d2cu8a2  
d2cu8a1 d1g47a2 d1g47a1 d1j2oa1 d1wyha1 d2dloa1 d1wiga1 d1wiga2  
d2cupa2 d2cupa3 d1x68a1 d2d8ya2 d2d8ya1 d1m3va2 d1x62a1 d1x68a2  
d1x61a1 d1b8ta3 d2d8xa2 d2d8xa1 d1x4ka1 d1x4ka2 d2cuqa1 d1m3va1  
d2co8a2 d1j2oa2 d1x63a1 d2cura1 d2cura2 d1x62a2 d1op9a\_ d1y01a1  
d1letzb1 d1egj11 d2gsib1 d1nj9a1 d4jfh1 d1aqk11 d1t2ja\_ d1lo4h1  
d1zvy1 d3v4v11 d4enec1 d1kxtb\_ d5e8ea1 d2pxya\_ d4weud\_ d1xiwc\_  
d2esvd1 d1qnz\_ d1logae1 d1f4xh1 d4n1hb\_ d3ezjb1 d3mlw11 d1kfah1  
d1letza1 d1b4jh1 d3cfic\_ d4w68a\_ d2arja1 d1ek3a\_ d2ok011 d1vera\_  
d1uwgh1 d1blnb1 d1fpth1 d1rzga1 d2giya1 d4m3kb1 d1nc2a1 d2nyyd1  
d1ncna\_ d1fbih1 d5dxwa\_ d4fqqa1 d1dqdh1 d1jfq11 d1kelh1 d1faih1  
d1frgl1 d1figl1 d4m6n11 d1fo0a\_ d4hxb11 d3b5ga\_ d3quyd1 d2h9gb1  
d1i8kb\_ d2dd8h1 d2ck0h1 d1eaja\_ d4w6wb1 d2a6ib3 d1t66d1 d2e27h\_  
d1ob1b1 d1f11b1 d2v7na1 d1ad0a1 d2xt1b1 d1pskh1 d4i13b1 d2op411  
d1a0q11 d1uwe11 d1za3a1 d1ncb11 d4uu9a\_ d1bm3h1 d1cloh1 d1nqba2  
d1cf8h1 d4y5va\_ d1mhph1 d5anma1 d4cdgc1 d4ldeb\_ d1y01b1 d2pcpb1

d1z3g11 d1dfb11 d1fh5h1 d3g5xa1 d1tzib1 d4dn3l1 d3zhka1 d2b1hh1  
d2uy1a1 d1f3dh1 d1nj9b1 d2agjh1 d2h1pl1 d1q72h1 d8fabb1 d1ndmb1  
d1rjca1 d4u6hb1 d3upca\_ d2fbj11 d1osph1 d1tvda\_ d2cjvh\_ d4fhbd1  
d1bd2d1 d1rz7h1 d3nn8a\_ d1knoa1 d1nfd1 d2bmkb1 d1dq11\_ d1igyb1  
d1igf11 d12e8h1 d3utza1 d1nc2b1 d1rihh1 d4mwfb1 d4jvpa1 d1mieh1  
d1rhfa1 d1fgn11 d1sbsh1 d1lp9e1 d1dn0a1 d4lqf11 d1iaih1 d1kgcd1  
d1mh5b1 d1gpol1 d2g60h3 d1f8t11 d2jixd1 d4grwh\_ d1fo0b\_ d1bfob1  
d1axsa1 d1u9ka\_ d1nmbh\_ d1h8na1 d1h8na2 d1jguh1 d4eura1 d3sdy11  
d35c8h1 d1w72l1 d1mvub\_ d1i9rh1 d1ob1a1 d4wenb\_ d1yeeh1 d3ietc1  
d1f58h1 d1ad0b1 d1mqk1\_ d1nbvh1 d4b50a\_ d3r8bb\_ d1baf11 d1mamh1  
d4rgne1 d2gsgb\_ d35c8l1 d1bafh1 d1ai1h1 d2pcpa1 d2fath1 d2x1pa\_  
d1orsb1 d1ibgl1 d1shma\_ d1a2yb\_ d1u0qa\_ d2coqa\_ d1hilb1 d1qfwi\_  
d1jv5b\_ d1fn4b1 d5e0qa\_ d1nsnh1 d1plgl1 d4ocx11 d1kb5h1 d1rzfh1  
d1pg7x1 d2fx7h1 d2oi9c\_ d1l7i11 d3eyva1 d1d5i11 d4ffyl\_ d1tet11  
d1a6wh\_ d1ac6a\_ d3dvfa\_ d1nfde1 d1mimh1 d1ri8a1 d1jhlh\_ d3dura\_  
d1fskb1 d1f97a1 d3so3b1 d2ak4d1 d1lp9f1 d4z7wf1 d1l7th1 d4y5ya\_  
d4x7ec1 d1emth1 d1ikf11 d1nlbh1 d4utal1 d1bjma1 d1eapb1 d1u6ah1  
d2dtgd1 d1kj2b\_ d1xeda1 d1c1eh1 d1fgvh\_ d2bnub1 d2fb4h1 d2dtgb1  
d1ktrh\_ d1jpth1 d1qkz11 d4hepg\_ d2atpb1 d1flrh1 d2hrp11 d1mvfa\_  
d1iaim1 d3k80a1 d2jb5h1 d3zkxc\_ d4grwe\_ d1it9h1 d1rhhb1 d3w9ec\_  
d1e4wh1 d1sy6h1 d2j6eh1 d3qxta\_ d1jglh1 d1p7ka1 d1tzhb1 d4n8pa1  
d1gaf11 d2jelh1 d1wioa2 d4i0cc1 d1cicb1 d1lmka2 d1lmka1 d1iqwh1  
d1orqb1 d1ejoh1 d1jnlh1 d4zga1\_ d43c9b\_ d1ggbl1 d1wejh1 d3q6fa1  
d1f3dj1 d3c6la1 d1bqlh1 d3p9wb\_ d1a3r11 d1h0db1 d2uzil\_ d1eo8l1  
d1qfw1\_ d1n7m11 d1igja1 d1c5ch1 d2a9mh\_ d1rmfh1 d1fj1b1 d4heme\_  
d1ccza1 d1a5fh1 d1ogad1 d1dlfh\_ d1qa9b\_ d1vgel1 d3qskb\_ d1sjxa\_  
d4ozfg1 d1sq2n\_ d1qd0a\_ d1kcvh1 d1c5db1 d3qcul1 d8faba1 d3bn9d1  
d1mjuh1 d4y8dc\_ d7fabh1 d3dvgb1 d1l0011 d1a6tb1 d1gigh1 d1kcrh1  
d2hwz11 d1yjdc1 d3clfl1 d4krna\_ d1d17l\_ d1e6o11 d1mexh1 d3r0ma\_  
d4kkna\_ d1fnsl1 d1oaqh\_ d1rzia1 d1lucbh1 d1ncw11 d4b41a\_ d1nfdfl1  
d2mpah1 d2d7t11 d4grwf\_ d4b5ea\_ d1lk3h1 d3u79a\_ d4u3xa\_ d1ghfl1  
d1bvkb\_ d1mcww1 d1b88a\_ d1jrhh1 d32c2b1 d4wemb\_ d1dsfh\_ d1op3h1  
d1cel11 d1iqda1 d1qoka1 d1qoka2 d1qfuh1 d2crya1 d1ay1h1 d1oaql\_  
d3ab0b\_ d1rur11 d1t4kb1 d1bz7b1 d1n0xh1 d1for11 d1lucb11 d4w6yb\_  
d43c9a\_ d2aab11 d1tzia1 d4n1ca\_ d1k6qh1 d3g9ab\_ d4tvsa1 d1igmh\_  
d1pz5b1 d3dx9a1 d3wxwh\_ d1nakh1 d1kcul1 d3eaka\_ d4qlra1 d1cr9l1  
d1d9ka\_ d1f4x11 d1deea1 d2i27n2 d1c12a1 d2orb11 d1j8hd1 d1mcph1  
d1c5da1 d1kenh1 d1bd2e1 d1h5ba\_ d4x7fc1 d3upaa\_ d1t3fa1 d1indh1  
d2dtgc1 d4hc111 d1zv5a1 d4wgvb\_ d1uwgl1 d4f37k1 d1aqkh1 d1vesa\_  
d3zkqd\_ d1fpt11 d1l04l1 d1knob1 d3rrqa\_ d1ct8b1 d4orzc\_ d1mlbb1  
d4hgkc1 d1dqdl1 d1bogb1 d4ozhe1 d1dr9a1 d1i7za1 d1dn0b1 d1kell1  
d1rzib1 d1ypzf1 d1wtla\_ d1hkfa\_ d1fail1 d1figh1 d2vyre\_ d1sjva\_  
d1ohqa\_ d1bfoa1 d1pkqb1 d1mjul1 d1b4j11 d1nsn11 d2arjb1 d1p4bh\_  
d4aj0a\_ d3nn8b\_ d2rcja1 d1f2xk\_ d4v1dd\_ d1adqh1 d2eksa\_ d4k3ga\_

d1jfqh1 d1luweh1 d1frgh1 d4gftb\_ dluz8b1 d4nlea\_ d1bm3l1 d1clol1  
d3mcka1 d2vqla1 d1ae6h1 d4aq1b1 d1uj3b1 d1nbqa1 d1fh5l1 d2ck0l1  
d2ywwa\_ d1q72l1 d4nbxb\_ d1hila1 d4hzb1 d2j88l1 d1zmya1 d1cd0a\_  
d1a4ka1 d1pskl1 d1a0qh1 d4krmb\_ d1ncbh1 d2fbjh1 d1j8he1 d1i3ua\_  
d1cf8l1 d1fe8h1 d2p1ya1 d1eeqa\_ d2x89a\_ d1ol0a\_ d2r0lh1 d1ub5a1  
d1dfbh1 d3eyvb1 d4jdvb1 d4p2cg\_ d2gsia1 d2agj11 d1u3ha1 d2h1ph1  
d1rihl1 d1fskc1 d1boga1 d2a77l1 d1ospl1 d1qfoa\_ d3dwta\_ d2fx7l1  
d1rz7l1 d3stba1 d1pkqa1 d1b6da1 d1dzba2 d1dzba1 d1kj2a\_ d4l1ha\_  
d1rzgb1 d1dq1h\_ d12e8l1 d1miel1 d1jmaa\_ d1sbs11 d1fgnh1 d1f58l1  
d1mqkh\_ d1ndgb1 d3qeg11 d1iail1 d2aw2a1 d1tqbc1 d3fo2a1 d4dkaa\_  
d1f8th1 d2g60l1 d2ywwa\_ d1uj3a1 d1yc7a\_ d3bd3a\_ d4w6xb1 d1nmb1\_  
d1i8ka\_ d1rjlb1 d1ypze1 d1p7kb1 d1kxqe\_ d1gpoh1 d2z4qa1 d1w72h1  
d1i9rl1 d4qgya1 d4xt1c\_ d2qqnh1 d1cica1 d3c08h1 d2cd0a\_ d2bdnh1  
d1hnga1 d1mam11 d1nldh1 d1cr9h1 d4lcih1 d3bkyh1 d3qg7l1 d1ai1l1  
d1kxvc\_ d4iosd\_ d117ih1 d2x1qa\_ d1ub6b1 d3k74b\_ d1ibgh1 d1teth1  
d1igy1 d1hxma1 d2x6ma\_ d2e71a\_ d5e03a\_ d1qfwm\_ d2r0kh1 d1igjb1  
d1rurh1 d1plgh1 d1mj8h1 d1yuhb1 d3fmg11 d1rzfl1 d1emt11 d1ad9b1  
d1igtb1 d1nlb11 d1d5ih1 d3k7ua\_ d4ffyh\_ d1bwwa\_ d3dvga1 d1a6ta1  
d1fgvl\_ d4qxxg11 d1mim11 d1jh11\_ d2hffb1 d2hh0l1 d1qkzh1 d1l7t11  
d1afvh1 d1iaii1 d2cjuh\_ d1um5h1 d2ghwb2 d2ghwb1 d1kgce1 d2fgwh1  
d1ikfh1 d1dvfd\_ d2i24n1 d2xtjb\_ d1za3b1 d2yc1a\_ d2hh0h1 d2x1oa\_  
d1bvka\_ d1rjla1 d5e7ba1 d1igta1 d1il1b1 d2fb4l1 d1mvua\_ d1jpt11  
d32c2a1 d1fvca\_ d1iqdb1 d2hrph1 d2p4ab\_ d4qo1a\_ d1p2cb1 d1wt5c\_  
d1t4ka1 d5c1mb\_ d1it9l1 d1bz7a1 d1b2wh1 d1e4wl1 d1jnl11 d1yedb1  
d1za6b1 d3u7aa\_ d1igfh1 d3gnml1 d1orsa1 d1wejl1 d1a2ya\_ d1hxmb1  
d1gafh1 d2j4wh1 d1pz5a1 d1j05a\_ d1a3rh1 d4fq1l1 d1qfwh\_ d1eo8h1  
d1n7mh1 d4s11a\_ d1kegh1 d5da4a\_ d1iqwl1 d3whxb1 d1vgeh1 d1deeb1  
d1c12b1 d1t2ql1 d1ad9a1 d3gsnb1 d3b2uc1 d1ggbh1 d1t3fb1 d1nak11  
d4ocmc\_ d1lila1 d2v7hb3 d2esve1 d1mcoh1 d2qr0b1 d2q3aa\_ d1ct8a1  
d1kcr11 d2pxyb\_ d2uzih\_ d5c3ld\_ d3durb\_ d1c5c11 d2ak4e1 d1d17h\_  
d1xiwd\_ d1mlba1 d1rmfl1 d1i7zb1 d1dlfl\_ d2xa3a\_ d5bq7b1 d1dqqb1  
d3h42l1 d1egjh1 d1kcv11 d1fe8l1 d2j6e11 d1f3rb2 d1lk3l1 d1sm3h1  
d1q0xh1 d1ghfh1 d7fab11 d1igch1 d1lo0h1 d4idla\_ d5c2bl\_ d1jrh11  
d1il1a1 d3zhda1 d4kfzc\_ d1b0wa\_ d1e6oh1 d1mex11 d4krpb\_ d1fnsh1  
d1ncwh1 d4hgma\_ d4eigb1 d4rzca\_ d2mpa11 d4y5xa\_ d5en2b1 d3lrga1  
d4ej1c1 d1rhha1 d1j05b\_ d1forh1 d1q9wb1 d2wzpd\_ d2aq2a1 d1h0da1  
d3revb1 d2ij0c1 d1tzha1 d4m7j11 d1k6ql1 d3b9kc1 d1igml\_ d3qeua1  
d1dsfl\_ d1ce1h1 d1kcu11 d1zvha1 d1zvoa1 d1tqbb1 d1ay1l1 d2qscl1  
d2cgrh1 d1nl0h1 d1ken11 d3eo0a1 d4n9ob1 d1n0x11 d3k1kc\_ d2cqva1  
d1fhga\_ d2k1ma\_ d1biha3 d1biha1 d1biha4 d3qp3a1 d1g1ca\_ d1gxea\_  
d1cvsc2 d1cvsc1 d1xmwa2 d1m4ka2 d2otpa2 d1biha2 d1rhfa2 d2fcba2  
d2fcba1 d1wwbx\_ d1gsma2 d1epfa1 d1epfa2 d2dava1 d1waaa\_ d1f97a2  
d1x44a1 d1vcaa2 d1fnla2 d1fnla1 d3b5ha2 d3h8na2 d3h8na1 d1jbja1  
d1jbja2 d1pd6a\_ d1f2qa2 d1f2qa1 d3cx2a\_ d1nbqa2 d3b5ha1 d1n26a1

d1xiwb\_ d1xaua\_ d1fltx\_ d2ifga1 d1olla1 d1olla2 d1cs6a4 d1cs6a3  
d1cs6a2 d1cs6a1 d2gw5a2 d1sy6a1 d1xiwa\_ dlucta2 dlucta1 dlry7b2  
d1gl4b\_ d1qz1a3 d1olza1 d2c9aa1 d1lwca\_

**Family-14 (a.39.1.5)**

**Positive dataset contains 19 protein sequences.**

d1tiza1 d3fwba\_ d2o5ga\_ d3i5gc\_ d1sl8a\_ d2roaa\_ d4aqra\_ d3pn7b\_  
d2obha\_ d2mlfc\_ d2m97a\_ d2d8na\_ d4by5a\_ d4nqga\_ d1s6ia\_ d1uhka2  
d1r2ua\_ d3kf9a\_ d3pn7c\_

**Negative dataset contains 4019 protein sequences.**

d1m32a\_ d1libja\_ d1c7na\_ d1iuga\_ d4q75a\_ d2bkwa1 d1t3ia\_ d1n8pa\_  
d1qz9a\_ d1jff9a\_ d1leg5a\_ d3kgwa\_ d1cl1a\_ d2ctza1 d1vjoa\_ d2rfva\_  
d1gc0a\_ d1cs1a\_ d1d2fa\_ d2ch1a1 d1qgna\_ d1pffa\_ d1elua\_ dlax4a\_  
d2v1pa1 d2ez1a\_ d1u08a\_ d1lc5a\_ d1b5pa\_ d2ay1a\_ d1bw0a\_ d3pd6a\_  
d7aata\_ d2csta\_ d1j32a\_ d1fg7a\_ d4wlha\_ d1o4sa\_ d1v2da\_ d1gdea\_  
d1m6sa\_ d1v72a1 d1svva\_ d1ajsa\_ d1wsta1 d2f8ja2 d1vp4a1 d1xi9a1  
d2gb3a1 d1yaaa\_ d3i2ka1 d1lnsa3 d2cfba1 d1o69a\_ d1bj4a\_ d3k28a\_  
d2bwpa\_ d3lg0a\_ d2fnua\_ d3ou5a\_ d1z7da1 d1b9ha\_ d1iaya\_ d4msoa\_  
d1bs0a\_ d1s0aa\_ d1sffa\_ d3tqxa\_ d1mdoa\_ d3qboa\_ d3pgya\_ d1bjna\_  
d2dkja\_ d1ejia\_ d1vefa1 d4wxga\_ d3bs8a\_ d3gbxa1 d1w23a\_ d2b5aa1  
d2ofya1 d4mcxa\_ d2xi8a\_ d2icta\_ d2bnma1 d2ppxa1 d1y7ya1 d1wioa4  
d1ccza2 d1vcaa1 d1dr9a2 d1lic1a1 d2d9qb1 d2nxyb2 d1ddla\_ d1e57b\_  
d1auyb\_ d1f56a\_ d1bypa\_ d1azca\_ d1ws8a\_ d3u25a\_ d1cuoa\_ d1id2a\_  
d1rkra\_ d2iaac\_ d4dp1x\_ d1nwpa\_ d2gima\_ d2i7sa\_ d1qhqa\_ d3ehbb1  
d1fftb1 d1gyca3 d1hfua2 d1kbva1 d1kbva2 d1sdda1 d1sdda2 d1gyca1  
d1gyca2 d1mzya1 d2bw4a1 d1aoza1 d1aoza3 d1aoza2 d1kyaa2 d1kyaa3  
d1kyaa1 d1mzya2 d4e9sa1 d1sddb1 d1sddb2 d1hfua1 d1hfua3 d1oela2  
d1oela1 d1v10a2 d1v10a3 d1v10a1 d1rypd\_ d1irua\_ d1rypc\_ d3unfk\_  
d1rypa\_ d1j2pa\_ d1irui\_ d1j2qh\_ d3unfh\_ d1m4ya\_ d1rypb\_ d1irug\_  
d1iru2\_ d1q5rh\_ d1rypg\_ d1g3ka\_ d1iruf\_ d1q5qa\_ d1e94a\_ d1irub\_  
d1ryph\_ d3ty6a\_ d1iruj\_ d1iruk\_ d1rype\_ d1irud\_ d1irue\_ d3mi01\_  
d1rypf\_ d1iruh\_ d2z3ba\_ d1iruc\_ d3mka2\_ d1iru1\_ d1a3qa1 d1iknc\_  
d3brda1 d1p7h11 d1oy3c\_ d1imhc1 d1gjia1 d1zk9a1 d2cxka1 d2bema\_  
d1pama1 d1ea9c1 d1qhoa1 d2fhfa2 d2fhfa1 d1k3ia1 d1j0ha1 d1csla1  
d2bhua1 d1edqa1 d1f1sa2 d1ut9a2 d1gvia1 d1txka1 d2phla2 d2phla1  
d1fxza2 d1lrha\_ d1uija1 g1dgw.1 d2v09a\_ d1uika2 d1uika1 d1dgwa\_  
d1ep0a\_ d2pa7a1 d1wlta1 d2c0za1 d1ds6b\_ d1fstb\_ d1ex0a1 d1eixa\_  
d3exra\_ d2ffca1 d2fdsa1 d3n3ma1 d2czda\_ d1q6oa\_ d2yyua\_ d1vqta1  
d1dbta\_ d3ldva1 d1au7a2 d1lic8a2 d2ovga\_ d1sq8a\_ d1rzsa\_ d3kz3a\_  
d3orca\_ d2q49a2 d1hdgo2 d2g17a2 d2cvoa2 d2czca1 d3pwka2 d1obfo2  
d1i32a2 d1zyao2 d2pkqo2 d1b7go2 d2hjsa2 d1cf2o2 d1vkna2 d1nvmb2  
d2msya\_ d2djoa1 d2r5za\_ d1au7a1 d1f43a\_ d2lmda1 d1akhb\_ d1s7ea1  
d3nara\_ d1zq3p1 d2craa1 d1mija\_ d4uuta\_ d3a01a\_ d1x58a1 d3rkqa1  
d3cmya1 d2cqxa1 d2da6a1 d1e3oc1 d1fjla\_ d1mh3a1 d1ig7a\_ d1x41a1  
d1wh7a1 d1gt0c1 d2mw8a\_ d1lfup\_ d1x2ma1 d1b72a\_ d1wi3a1 d1jgga\_

d1wjha1 d1x2na1 d1mnmc\_ d2cuea1 d3k2aa\_ d2hosa\_ d2jwta2 d1pufa\_  
d1octc1 d2hi3a\_ d1b8ia\_ d4j19a\_ d3lnqa\_ d1wh5a1 d1b8ib\_ d1fexa\_  
d2cqra1 d1guua\_ d1ug2a1 d2cqqa1 d2ajea1 d4a69c\_ d2crga1 d2iw5b1  
d1xc5a1 d1ofcx1 d2cu7a1 d1wgxa1 d2cjja1 d2ckxa1 d1gvda\_ d1hcra\_  
d1tc3c\_ d1gdta1 d1u78a2 d1xg1a1 d1itya\_ d1hlva2 d1iufa2 d1iufa1  
d2dara2 d2dara1 d1wyha2 d2dloa2 d1rutx4 d1rutx3 d2cuqa2 d1x41a2  
d1x41a1 d1x3ha2 d1x3ha1 d2d8za1 d1x61a2 d1x6aa1 d1x6aa2 d2cora2  
d2cora1 d1v6ga1 d1v6ga2 d2d8za2 d1x64a1 d1x64a2 d1b8ta1 d2co8a1  
d1x63a2 d2dj7a2 d2dj7a1 d2cu8a2 d2cu8a1 d1g47a2 d1g47a1 d1j2oa1  
d1wyha1 d2dloa1 d1wiga1 d1wiga2 d2cupa2 d2cupa3 d1x68a1 d2d8ya2  
d2d8ya1 d1m3va2 d1x62a1 d1x68a2 d1x61a1 d1b8ta3 d1b8ta2 d2d8xa2  
d2d8xa1 d1x4ka1 d1x4ka2 d2cuqa1 d2co8a2 d1j2oa2 d1x63a1 d2cura1  
d2cura2 d1x62a2 d3ubub\_ d1legia\_ d1qo3c\_ d1v7pa\_ d1tdqb\_ d3ubua\_  
d1c3ab\_ d1h8ua\_ d3bx4b\_ d1t8ca1 d1sb2a1 d1qdda\_ d2ziba1 d3cada\_  
d1byfa\_ d1j34b\_ d1jwia\_ d1jzna\_ d1c3aa\_ d1oz7b\_ d1wmza\_ d3bdwb\_  
d1hq8a\_ d1fifa1 d1dv8a\_ d3hupa\_ d1wk1a1 d1umra\_ d2afpa\_ d3bx4a\_  
d1gz2a\_ d1sl6a\_ d1v7pb\_ d3g8ka\_ d1ixxa\_ d1j34a\_ d1jwib\_ d1g1sa1  
d1y17a1 d1ja3a\_ d1fvub\_ d3bdwa\_ d1sb2b1 d1fvua\_ d1umrc\_ d1oz7a\_  
d4m17a\_ d3cfwa1 d1ypqa1 d1g1ta1 d3fd4a\_ d3l9jc\_ d4dn8a1 d1v41b\_  
d1rdl1\_ d2msba\_ d3lv8a\_ d1s3ga1 d1zaka1 d1s4qa\_ d3tvta2 d1uf9a\_  
d1khta\_ d1ckea\_ d1osna\_ d1p5zb\_ d4tmka\_ d3cm0a\_ d1tmka\_ d1jaga\_  
d3h86a\_ d1t0hb\_ d1nn5a\_ d2h92a\_ d3kb2a1 d2c95a1 d1yj5a2 d1kgda\_  
d1ly1a\_ d2ak3a1 d1vyva2 d1deka\_ d2grja1 d1p3ja1 d1y63a\_ d1e4ya1  
d1s96a\_ d3iija1 d1lvga\_ d1nksa\_ d1vyua2 d4e22a\_ d1qf9a\_ d1jjva\_  
d1q3ta\_ d1ki9a\_ d1lw7a2 d1teva\_ d1kjwa2 d1gsia\_ d2iyva2 d1viaa\_  
d1e6ca\_ d1odfa\_ d1uj2a\_ d4gi7a\_ d2jeoa1 d1z0ja1 d3umra2 d3gj0a1  
d2gaoa1 d1yzga1 d1x3sa1 d1g7sa4 d1puja\_ d1udxa2 d1kk1a3 d2o52a\_  
d1jwyb\_ d1zcaa2 d1zcba2 d2fv8a1 d2cjwa\_ d3dz8a1 d1xzpa2 d1vg8a\_  
d4qxaa\_ d2ew1a1 d1x1ra1 d2bcgy\_ d3doea1 d3cona\_ d3rega\_ d3wyga\_  
d1upta\_ d2b6ha1 d1zd9a1 d1lnza2 d1r5ba3 d1n0ua2 d1r2qa\_ d2f91a1  
d2rhda\_ d3q3jb\_ d3q85a\_ d1efma1 d1r8qa\_ d2gf9a1 d2akab1 d1ek0a\_  
d1z08a1 d2gcoa1 d2dyla2 d4g01b\_ d2cxxa1 d1svia\_ d3q72a\_ d1ni3a1  
d4ac9a4 d2erxa1 d2bmea\_ d1wxqa1 d2gf0a1 d4ldja1 d1zunb3 d1d5ca\_  
d4lv5b\_ d1efca3 d1kmqa\_ d2g6ba1 d3lrpa\_ d1tada2 d2y8ea\_ d4rd4a1  
d1z06a1 d2heia\_ d3a58b\_ d1u01a2 d1d2ea3 d1zj6a1 d2ocba\_ d3rwoa\_  
d1mr3f\_ d2e9sa1 d4u5xa1 d2iwra\_ d2fn4a1 d3bwdd\_ d2nzja1 d2atva1  
d2ksqa\_ d3l43a\_ d1mkya2 d1mkya1 d1wmsa\_ d1jnya3 d2rmka\_ d1f6ba\_  
d1f60a3 d1gota2 d1jala1 d2fh5b1 d1g16a\_ d2wblc\_ d1m7ba\_ d1wf3a1  
d1f5na2 d1t9ha2 d1z6xa1 d1z0aa1 d2fg5a1 d2a5ja1 d2bcjq2 d1s0ua3  
d1ky3a\_ d4y0va\_ d4lhwa\_ d2qmea1 d2atxa1 d1legaa1 d1ryha\_ d1moza\_  
d1nrjb\_ d2erya1 d3bfka\_ d1puia\_ d3j3az1 d3t5ga\_ d1shza2 d3defa\_  
d2f7sa1 d3raba\_ d3tsoa\_ d3aq4a\_ d2a17a1 d3sfva1 d3bc1a\_ d2ncda\_  
d1sdma\_ d3h4sa1 d2heha\_ d2grya\_ g3kin.1 d1kk8a2 d1br2a2 d1goja\_  
d1f9va\_ d2mysa2 d1lkxa\_ d3t0qa\_ d4db1a1 d3gbja\_ d1ry6a\_ d1v8ka\_



d1vava\_ d1luaia\_ d1k8ka2 d1k8ka1 d3uleb1 d3i33a2 d3i33a1 d1bupa1  
d1dkgd2 d1dkgd1 d4ci6a2 d1jcfal d4a2ba2 d2fxua1 d1yaga2 d1yaga1  
d4cbua2 d1bupa2 d3vrda1 d3vrda2 d1fcdc2 d1fcdc1 d1h1oa1 d1m70a2  
d1m70a1 d1lig8a1 d1czan2 d1czan3 d1czan1 d1lig8a2 d1czan4 d1bg3a4  
d1bg3a3 d1bg3a2 d1bg3a1 d1nira1 d1qksa1 d1hroa\_ d4gedb\_ d3zooa\_  
d1mz4a\_ d1gu2a\_ d1f1fa\_ d1dvva\_ d1c6ra\_ d1c75a\_ d1e29a\_ d1gdva\_  
d1cnoa\_ d1h32b\_ d1co6a\_ d2bh4x\_ d2aiua\_ d5cytr\_ d1jdl\_ d1i8oa\_  
d2zboa\_ d3dmia\_ d1ls9a\_ d1wvec\_ d2yk3a\_ d3ph2b\_ d1dw0a\_ d5aura\_  
d1ql3a\_ d1qn2a\_ d1f1ca\_ d4zzva\_ d2xspa\_ d4v20a\_ d1ojja\_ d4ipma1  
d1gpia\_ d4csia\_ d3pfza\_ d3ovwa\_ d2yoka\_ d2nqya\_ d1h4ga\_ d1hixa\_  
d1oa2a\_ d1olra\_ d3b7ma\_ d4h7ma1 d3wp3a\_ d2vgda\_ d1ligoa\_ d3zsea\_  
d2nlra\_ d3wx5a\_ d1oa3a\_ d1pvxa\_ d1f5ja\_ d1oa4a\_ d1ks5a\_ d4ix1a1  
d1h32a2 d1cnt1\_ d1pvhb\_ d1z7ca\_ d1huwa\_ d1bgea\_ d1rhga\_ d1f6fa\_  
d1f45b\_ d1i1rb\_ d1axia\_ d1etea\_ d3tgxb\_ d1scfa\_ d2z3qa1 d3qb1a\_  
d1hula\_ d4nkqb\_ d1eera\_ d1v7mv\_ d5e4ea\_ d2o27a\_ d3b5ka\_ d2psma1  
d4zf7a\_ d3uf5a\_ d4x51a\_ d1d9ca\_ d4ypgc1 d3oq3a\_ d1lqsl\_ d1n1fa\_  
d1aula\_ d1wu3i\_ d3bes1\_ d3ux9a\_ d1v8fa\_ d2ejca\_ d3muea1 d1lihoa\_  
d3q12a1 d3rbaa\_ d2qtra\_ d1nupa\_ d3l92a\_ d1f9aa\_ d1qjca\_ d2h29a\_  
d1vlha\_ d1od6a\_ d1lw7a1 d1mrza2 d4ruka\_ d2e17a\_ d1iq0a2 d1irxa2  
d1r6ta2 d1ivsa4 d2cyba\_ d1rqga2 d1j09a2 d2yxna\_ d1f7ua2 d1h3fa1  
d2g36a1 d1nzja\_ d1jila\_ d1n3la\_ d1i6la\_ d1pfva2 d1h3na3 d3n9ia\_  
d3sz3a1 d3sw2a\_ d1moxc\_ d1dx5i3 d1edmb\_ d1autl2 d1autl1 d1dva11  
d1szba2 d1kigl\_ d2y5f1\_ d1ijqa2 d1gk5a\_ d1g1sa2 d1nt0a3 d1xdtr\_  
d1lmja2 d1lmja1 d1nzia2 d2wphe\_ d1klil\_ d1pfx12 d1pfx11 d1p9ja\_  
d1g1ta2 d1f7ea\_ d4yzub\_ d2mgpa1 d1b9wa1 d2mgpa2 d1ob1c1 d1ob1c2  
d1n1ia2 d1n1ia1 d2npra2 d2npra1 d1gl4a2 d1m1xb5 d1s5ja2 d1qhta2  
d4dlea2 d1tgoa2 d3py8a2 d1q8ia2 d1kfsa2 d2py5a2 d1d5aa2 d1sfsa\_  
d1wkya2 d1uuqa\_ d3wh9a\_ d4m1ra\_ d1xyza\_ d4xuya\_ d2je8a5 d4bf7a1  
d3cuia\_ d1ur4a\_ d1qw9a2 d1lodza\_ d2vzsa5 d1bqca\_ d2x2ya1 d1hjqa\_  
d1qnra\_ d4y7ea1 d1vjza\_ d4k68a\_ d2v3ga\_ d4hpga\_ d1nofa2 d1nq6a\_  
d1h4pa\_ d1aq0a\_ d3ziza\_ d4bs0a\_ d1ecea\_ d1h1na\_ d1ta3b\_ d1w91a2  
d1i1wa\_ d1uhva2 d1us3a2 d1legza\_ d7a3ha\_ d1tvna1 d3nyda1 d1ghsa\_  
d2cyga1 d4xv0a\_ d2c8na2 d1w32a\_ d3emca\_ d1v6ya1 d1foba\_ d2uwfa1  
d2fgla\_ d3niya1 d2c0ha1 d1rh9a1 d1yq2a5 d1szna2 d1fa2a\_ d1pama4  
d5do8a1 d1ea9c3 d1hx0a2 d2fhfa5 d1qhoa4 d1avaa2 d1m53a2 d4m8ua1  
d2gjpa2 d1lwha2 d4howa1 d1ktba2 d1j0ha3 d3vm5a1 d2x1ia\_ d1wzaa2  
d1uasa2 d2diea1 d1mxga2 d1ht6a2 d1eswa\_ d1iv8a2 d5cpsa\_ d1ud2a2  
d1zjaa1 d3gbea1 d1kwga2 d1wdpa\_ d1gcya2 d1g5aa2 d1hvxa2 d3dhpa2  
d2bhua3 d4do4a1 d3qgva1 d1e43a2 d1g94a2 d2d3na2 d1gjwa2 d1gvia3  
d1x1na1 d1r7aa2 d1tz7a1 d4c7ga2 d2gjxa1 d1nowa1 d1yhta1 d4toqa\_  
d1wb0a1 d1w9pa1 d1eoka\_ d1itxa1 d1kfwal d1goia2 d1ledqa2 d2gsja\_  
d1hjxa1 d1jnda1 d1vf8a1 d3wdpp1 d3wq5a\_ d4gxpa\_ d4hz8a\_ d1e4mm\_  
d3aiua\_ d1wcga1 d1qvba\_ d3ahxa\_ d1v02a\_ d2dgaa\_ d1pbga\_ d1vffa1  
d1qoxa\_ d4ha4a\_ d1mixa2 d1j19a2 d1isna2 d2a16b2 d1g4ma1 d1g4ma2

d2y8ga\_ d1xkea1 d1k5db\_ d2y8fa\_ d2v76a\_ d1wj1a1 d1aqca\_ d1qqga2  
d1qqga1 d1n3ha\_ d4dbba\_ d3f0wa1 d1p3ra\_ d1wgua1 d2cy4a1 d3hqca\_  
d1wvha1 d1xr0b1 d1wgqa1 d1v89a1 d2coda1 d1zc3b\_ d1wg7a1 d1u5ea1  
d1v61a1 d2coca1 d2ys1a1 d1v5pa1 d1ntya2 d1wjma1 d1wi1a1 d1u29a\_  
d1xx0a1 d1unqa\_ d2zkmx3 d1fhoa\_ d1v88a1 d2adza1 d1x1fa1 d1p6sa\_  
d2coaa1 d1btka\_ d1v5ma1 d1faoa\_ d2x18a\_ d1dyna\_ d1x1ga1 d4kaxb\_  
d2j59m1 d1ki1b2 d1xcga2 d1txda2 d1u5da1 d1dbha2 d1wl1ha\_ d1upqa\_  
d1v5ua1 d1foea2 d2fj1a1 d1eaza\_ d2dfka2 d2cofa1 d1kz7a2 d1h6ta1  
d91dta1 d2ewda3 d1up7a1 d2dfda1 d1s6ya1 d1vjta1 d7mdha1 d1hyea1  
d1t2da1 d1ojsa3 d1b8pa1 d1llda1 d1hyha1 d1civa1 d2a92a1 d1ez4a1  
d1i0za1 d1y6ja1 d1gv0a1 d1ur5a1 d1llda1 d1lobba1 d1v8ba1 d1gdha1  
d2dlda1 d1mx3a1 d1ygya1 d1qp8a1 d1li4a1 d1j4aa1 d2naca1 d1npya1  
d3t4ea2 d1a4ia1 d1o0sa1 d2hk9a2 d2egga2 d1b26a1 d1bvua1 d1gq2a1  
d1clda1 d1leha1 d1gtma1 d1euza1 d1nvt1 d3dona2 d1ledza1 d1gpja2  
d1vi2a1 d1p77a1 d1nyta1 d1vl6a1 d1v91a1 d1txga2 d3f47a1 d1mv8a2  
d2pv7a2 d1xc2a3 d2ahra2 d4xiya1 d2f1ka2 d1pgja2 d1i36a2 d1np3a2  
d1lj8a4 d1teaa3 d2i76a2 d2g5ca2 d1wdka3 d1dlja2 d3cuma3 d1kola2  
d1f8fa2 d1qora2 d1jqba2 d1vj0a2 d1cdoa2 d1gu7a2 d1d1ta2 d1xa0a2  
d2dm6a2 d1jvba2 d1rjwa2 d1llua2 d1h2ba2 d1tt7a2 d1piwa2 d1o89a2  
d1iz0a2 d1e3ja2 d1yb5a2 d1uufa2 d1vj1a2 d1e3ia2 d3gpdg1 d1vc2a1  
d2nvwa1 d1u8fo1 d1ydw1 d1hdgo1 d2g17a1 d1cf2o1 d2czca2 d1r0ka2  
d1obfo1 d2cvoa1 d1ebfa1 d1h6da1 d1i32a1 d1zh8a1 d2q49a1 d1qkia1  
d1j5pa4 d3pzra1 d1xeea1 d1vkoa1 d1vm6a3 d3qvsa1 d2pkqo1 d1b7go1  
d1gr0a1 d1p1ja1 d1lc0a1 d1j0xo1 d3pwka1 d2hjsa1 d1zyao1 d1vkna1  
d1tlta1 d1nvmb1 d3sjua\_ d3ojfa1 d1xu9a1 d2jjya1 d1n7ha\_ d1y1pa1  
d1h5qa\_ d1jtv1\_ d4fs3a\_ d2bkaa1 d1gy8a\_ d2c5aa1 d1ulsa\_ d1ooea\_  
d2b69a1 d1y5ma1 d1spxa\_ d1aela\_ d1bxka\_ d1ydea1 d1gega\_ d1hdoa\_  
d1o5ia\_ d1e6ua\_ d1snya1 d2rhca\_ d3zv4a\_ d5ceja\_ d2d1ya1 d1fjha\_  
d3w8ea\_ d2fmua1 d1x1ta\_ d1rpna\_ d3ay7a1 d1k2wa\_ d1eq2a\_ d2hrba1  
d3ruaa\_ d2ew8a1 d4hwka\_ d1xgka\_ d2bd0a1 d1yo6a1 d2a35a1 d2ntva\_  
d1vl8a\_ d1hdca\_ d4bkua\_ d2ag5a1 d2q45a\_ d1nffa\_ d4iy1a\_ d1zbqa1  
d1kewa\_ d1ek6a\_ d1ja9a\_ d2q46a2 d1iy8a\_ d1cyda\_ d2ptga\_ d1hxha\_  
d1uzma1 d3lyla\_ d4m89a\_ d3wyea\_ d2b11a1 d1w6ua\_ d1sb8a\_ d2q2va\_  
d4nr0a\_ d1e6wa\_ d2gasa\_ d3oiga1 d2bgka1 d1mxha\_ d1vl0a1 d1rkxa\_  
d1r6da\_ d1wmaa1 d1e7wa\_ d2c07a1 d1xkqa\_ d3tzha\_ d1g0oa\_ d3lz6a\_  
d1qyca\_ d1ledoa\_ d1oc2a\_ d1t2aa\_ d1zema1 d2xoxa\_ d1z45a2 d1geea\_  
d1p33a\_ d3lt0a\_ d4e6pa\_ d2wyua\_ d1db3a\_ d4q9na\_ d1xhla\_ d4o1ma\_  
d1fmca\_ d2uvda\_ d2gdza1 d1uaya\_ d2z1ma\_ d2o23a2 d2fr1a2 d2fr1a1  
d1qsga\_ d1qyda\_ d4zjua\_ d2a4ka1 d1yb1a\_ d1wvga1 d1yxma1 d3f4ba\_  
d1mg5a\_ d1xg5a1 d1r55a1 d3gboa\_ d1atla\_ d1kufa\_ d4q11a\_ d1quaa\_  
d1ypl1a\_ d1wnia\_ d1ex0a4 d1g0da4 d2f4ma1 d1x3za\_ d1mdwa\_ d1ziva1  
d1zcm1 d1t3ca\_ d2a97a\_ d3f1ea\_ g1e1h.1 d3ioqa\_ d1fh0a\_ d1o0ea\_  
d1khqa\_ d1m6da\_ d2cb5a\_ d1cs8a\_ g8pch.1 d1s4va\_ d2pnsa\_ d1vsna1  
d1mira\_ d1liwda\_ d2oula\_ d7pcka\_ d3bwka\_ d3bcna\_ d2p86a\_ d1pvja\_

d1pcia\_ d1gece\_ d1deua\_ d4bs6a\_ d1xkga1 d1cqda\_ d1jqpa2 d2c0ya\_  
d2bdza\_ d3p5ua\_ d2o36a\_ d1zoya1 d1qo8a2 d1d4ca2 d1chua2 d1jnra2  
d1kf6a2 d2jk6a2 d2jk6a1 d1feca1 d1feca2 d1lpfa1 d1lpfa2 d1xhca1  
d1xhca2 d1dxla2 d1dxla1 d1gera2 d1m6ia2 d1onfa1 d1onfa2 d3lada2  
d3lada1 d1w4xa1 d1w4xa2 d1gesa2 d1mo9a1 d1xdia1 d1fl2a2 d1fl2a1  
d1fcda1 d1fcda2 d1h6va2 d1h6va1 d1mo9a2 d1gv4a2 d1gv4a1 d2gv8a2  
d2gv8a1 d1aoga1 d1aoga2 d1hyua1 d1ebda1 d1ebda2 d3dk9a1 d1q1ra2  
d1q1ra1 d1gesa1 d3syxa1 d1mkea1 d2p8va\_ d1xoda1 d1i7aa\_ d1evha\_  
d1qc6a\_ d1ps9a2 d1o94a2 d1lqta1 d1pn0a1 d1reoal d1ju2a1 d2f5va1  
d3c96a1 d2gmha1 d1pj5a2 d1gpea1 d1o5wa1 d1n4wa1 d1k0ia1 d2dw4a2  
d2ivda1 d1seza1 d2voua1 d1kdga1 d1s5ja1 d2hbja2 d2igia\_ d1wlja\_  
d1qhta1 d4dlea1 d1tgoa1 d2f96a1 d3tr8a1 d3mxma\_ d1q8ia1 d1y97a1  
d1w0ha\_ d1kfsa1 d2py5a1 d1noya\_ d1d5aa1 d1yt3a3 d2guia\_ d3mwpal  
d4kb1a\_ d2hmta\_ d1lssa\_ d1js9c\_ d1f15b\_ d1za7a\_ d1iuka\_ d2csua1  
d3q9ub\_ d2yv1a1 d3q9na\_ d2d59a\_ d1oi7a1 d2yv2a1 d1euca1 d1y81a1  
d3nvva1 d1krha3 d2h88b1 d1n62a2 d1t3qa2 d1kf6b2 d1zoyb1 d1jq4a\_  
d1ffva2 d1dgja2 d1rm6c2 d1jmx2a d1jmx1a d1pbya2 d1r7ha\_ d1faaa\_  
d1wikal d1xfla\_ d1ttza1 d2f51a1 d1ti3a\_ d1nhoa\_ d1sena\_ d2i4aa\_  
d1ep7a\_ d1zmaa1 d1fo5a\_ d3lefa1 d3diea1 d2yana1 d1z6na1 d1oaza\_  
d3zywa1 d4aj8a\_ d1nm3a1 d4fiwa\_ d1wmja\_ d4hs1a1 d1liloa\_ d1xwaa1  
d1wjka1 d2vmla\_ d1fb6a\_ d1gh2a\_ d1h75a\_ d1nw2a\_ d1kx5b\_ d3a6na\_  
d4m6ba2 d2nqbd\_ d3wkjd\_ d2yfwe\_ d4h9na\_ d5bnxa\_ d1kx5c\_ d3r45a\_  
d1eqzb\_ d4jjnb\_ d1f66c\_ d1eqza\_ d4wnnb\_ d1kx5a\_ d1u35c1 d1id3a\_  
d2nqbc\_ d1tafa\_ d1bh9b\_ d1tafb\_ d1jfib\_ d1q9ca\_ d2byka1 d1n1ja\_  
d4g92b\_ d1bh9a\_ d1jfia\_ d1h3oa\_ d2bykb1 d1n1jb\_ d1pd212 d1nhya2  
d2a2ra2 d1k0dd2 d1f2ea2 d1gsua2 d2fhea2 d2pvqa1 d1tw9a2 d1oyja2  
d1e6ba2 d1k0ma2 d3ik7a1 d4is0a1 d1r5aa2 d1jlva2 d1m0ua2 d3gtub2  
d1z9ha2 d1okta2 d1axda2 d2gsra2 d1tu7a2 d1k3ya2 d1zgma1 d1b48a2  
d1gnwa2 d1gwca2 d2gsta2 d1glqa2 d1oe8a2 d1pn9a2 d1v2aa2 d1fw1a2  
d1duga2 d1a0rp\_ d1iqca2 d1iqca1 d1eb7a1 d1nmla2 d1nmla1 d4iilya\_  
d4olta\_ d1qgia\_ d1qqya\_ d1gd6a\_ d1f6ra\_ d1livma\_ d2gv0a\_ d1iiza\_  
d2z2fa\_ d1j8xa\_ d1ghla\_ d1b9oa\_ d1741a\_ d1691a\_ d2o4wa\_ d1p37a\_  
d1k28a3 d1xjta1 d1jtma\_ d2f2qa\_ d4e97a1 d1mpya2 d1kw3b2 d1kw3b1  
d4ghga1 d1tfza1 d3isqa1 d3isqa2 d1sqia1 d1sqia2 d1lkda2 d1lkda1  
d1mpya1 d1cjxa2 d1sp9b2 d1t47a1 d1t47a2 d1flua2 d1sp8a1 d1sp8a2  
d1flua1 d1etob\_ d1lumqa\_ d4iuua3 d4bvva\_ d5hpga\_ d3k65a\_ d1ki0a3  
d1ki0a2 d1ki0a1 d1a0ha1 d1pmla\_ d3sp8a3 d2feba1 d1qsta\_ d2beia1  
d4m3sa\_ d1u6ma1 d1ygha\_ d1yk3a1 d3dr6a\_ d1xmta\_ d1z4ea1 d2ge3a1  
d1bo4a\_ d2fiaa1 d2jdca1 d1y9wa1 d3to7a\_ d1wwza1 d2fl4a1 d2ozua1  
d2b5ga\_ d2cy2a1 d2p0wa\_ d1cm0a\_ d4pswa\_ d1yrea1 d1yr0a1 d1m4ia\_  
d2gana1 d1yvka1 d1ghea\_ d2g3aa1 d1y7ra1 d2euia1 d1q2ya\_ d2fsra1  
d1xeba\_ d2ae6a1 d1cjwa\_ d1qsma\_ d2aj6a1 d1y9ka1 d1i12a\_ d1vkca\_  
d2atra1 d1n71a\_ d2d4pa1 d2fiwa1 d2fe7a1 d1tiqa1 d2ou2a\_ d1yx0a1  
d2fcka1 d1p0ha\_ d2j8ma\_ d2pq8a\_ d1z4ra1 d1s3za1 d1ufha\_ d1xvqa1

d1pn0a2 d3hy2a\_ d2cvba1 d1o8xa\_ d1lu4a\_ d1we0a1 d2bmxal d2a4va1  
d1psqa\_ d1xiya1 d1q98a\_ d1n8ja\_ d1zofa1 d2ggta\_ d3tjja\_ d4jela1  
d1o73a\_ d3s9fa\_ d2zcta\_ d1qmva\_ d1jfua\_ d2b1ka\_ d5dvba1 d2b5xa1  
d2v2ga\_ d1st9a\_ d3tb2a\_ d4llra\_ d4fh8a1 d1knga\_ d2h30a\_ d1i5ga\_  
d2z9sa\_ d2f8aa1 d1tp9a1 d2b7ka\_ d1nm3a2 d3hvva\_ d2wfca1 d4kcea\_  
d1xvwa1 d4gqca1 d3qpma\_ d4k1fa\_ d1zzoa1 d1gp1a\_ d1prxa\_ d4od7a1  
d1z6ma1 d4mcua1 d4dvca1 d1r4wa\_ d3l9sa\_ d1un2a\_ d3rppa\_ d1rw1a\_  
d1z3ea1 d3l78a\_ d1f74a\_ d3l21a\_ d2e1da\_ d1to3a1 d1w3ia\_ d1sfla\_  
d1n7ka\_ d1vcva1 d4imea\_ d1wa3a\_ d2ocza1 d1f2ja\_ d3m16a\_ d2yxga\_  
d1ub3a\_ d3a5fa\_ d1fbaa\_ d1l6wa\_ d1xfba1 d1wx0a1 d1vpxa1 d1ojxa\_  
d2a4aa1 d1xkya1 d3cq0a1 d3s1xa\_ d1f05a\_ d1fdja\_ d3cp1a1 d4d2ja\_  
d1jgta2 d1ofda3 d1ea0a3 d1ecfa2 d1q15a2 d1ao0a2 d1te5a\_ d1ra6a\_  
d1muka\_ d3gsza\_ d1khva\_ d1te9a\_ d2xwha\_ d3uqsa\_ d3hkwa\_ d3n6ma\_  
d2cjqa\_ d2xyma\_ d1teba\_ d1te8a\_ d1u09a1 d4wfxa\_ d3tyqa\_ d2pgga1  
d1lgya\_ d4l3wa\_ d1llfa\_ d1gz7a\_ d1lukca\_ d1svpa\_ d3su6a1 d1cu1a1  
d4agka\_ d1vcpa\_ d1q31a\_ g1n11.1 d3e90b\_ d1ep5a\_ d3u1jb\_ d3zxha\_  
d1cgl1a\_ d1rm8a\_ d1eaka2 d1hy7a\_ d2jsda\_ d1cxva\_ d1hv5a\_ d1i76a\_  
d3p0ya1 d1lgra1 d1lgra2 d1n8yc2 d1n8yc1 d1m6ba2 d1m6ba1 d1m4la\_  
d2bk7a\_ d3fjua\_ d1z5ra1 d1kwma1 d1uwya2 d2c1ca1 d1tda\_ d1h81a2  
d2tbvc\_ d1c8nc\_ d1x36a\_ d1smvc\_ d1ng0c\_ d4sbvc\_ d1lopa\_ d1f2nc\_  
d1cixa\_ d1y29a\_ d1v7fa\_ d2jtba\_ d1d1ha\_ d1g9pa\_ d1lupa\_ d1qk7a\_  
d1mb6a\_ d2a2va\_ d1niya\_ d1i25a\_ d1hvwa\_ d2mpqa\_ d1ie6a\_ d1kqha\_  
d1la4a\_ d2mxoa1 d1koza\_ d1qk6a\_ d1emxa\_ d1lqra\_ d1c6wa\_ d1rmka\_  
d1ixta\_ d1eyoa\_ d1cna\_ d1fu3a\_ d1glpa\_ d1fyga\_ d3lgia\_ d3i77a\_  
d2z9ia2 d4nsva\_ d1lcya2 d4jcna\_ d1agja\_ d1os8a\_ d1hpga\_ d1p3ca\_  
d1l1ja\_ d1qtfa\_ d1ny721 d1ny722 d1a6ca3 d1a6ca2 d1a6ca1 d1pgl22  
d1pgl21 d1pgl11 d1ny711 d1mqta\_ d1d4m3\_ d1fmd3\_ d2mev1\_ g1aym.1  
d1ev13\_ d4q4w1\_ d1r1a3\_ d2x5ia\_ d1rhi1\_ g1r1a.1 g1d4m.1 g1rhi.1  
d1b35b\_ d1lopa\_ d1tme1\_ d4iv1a\_ g1pvc.1 g1fpn.1 d1fpn1\_ d4gb31\_  
d1d4m1\_ d1fmd1\_ d1ev11\_ d2wzr3\_ g1cov.1 d1qqp3\_ g1fmd.1 d2x5ic\_  
d1rhi3\_ g1oop.1 d1hxs1\_ d1fpn3\_ d1bev1\_ g2mev.1 d1eah3\_ d1aym1\_  
d1pvc3\_ d1qqp1\_ d1zba3\_ d1h8ta\_ d3vbhc\_ g1b35.1 g1bev.1 d1hxs3\_  
g1ev1.1 d1bev3\_ g1tmf.1 d1tmf1\_ d1b35a\_ d2mev3\_ g1eah.1 g1h8t.1  
d1eah1\_ d4q4w3\_ d1r1a1\_ d1aym3\_ d1pvc1\_ d1zba1\_ d1h8tc\_ d1loopc\_  
d1tme3\_ g1qqp.1 d4iv1c\_ g1tme.1 d1p8ba\_ d4w9ta\_ d1jvna1 d4x2ra1  
d1ka9f\_ d4axka1 d1thfd\_ d1h5ya\_ d4u28a\_ d2y88a\_ d4wd0a\_ d1vzwa1  
d3ia2a\_ d1a88a\_ d4dgqa1 d1hkha\_ d1zoia\_ d4lt9a1 d3tc7a1 d3hoja\_  
d1i4na\_ d3vnda\_ d3n18a1 d3nava1 d1v5xa\_ d4a2ra1 d3tc6a1 d1ujpa\_  
d4ijba\_ d1xcfa\_ d1vc4a\_ d1rd5a\_ d1qopa\_ d3b5va\_ d2r80b\_ d1cqxa1  
d1gcvb\_ d3boma\_ d2h8fb\_ d2raoa\_ d3bj1a\_ d4hrrb\_ d2r50a\_ d3d1kb\_  
d2aalb1 d3zhwa\_ d3hf4b\_ d3gdja\_ d1jebb\_ d3bj1b\_ d1x9fb\_ d1wmub\_  
d1gcva\_ d3bcqb\_ d3d4xb\_ d1gvha1 d2dc3a\_ d3hf4a\_ d4yu3a\_ d3k8ba\_  
d1qpwb\_ d2r80a\_ d3bcqa\_ d1v4wa\_ d3wtgb\_ d1j17a\_ d4esaa\_ d1a9we\_  
d3d1ab\_ d1fs1a\_ d4h21a\_ d1v4wb\_ d1mwca\_ d1vhba\_ d1jeba\_ d1spgb\_

d1h97a\_ d1q1fa\_ d1tu9a1 d3d1aa\_ d1hdsb\_ d3hyub\_ d2zffb\_ d3fs4a\_  
d1oj6a\_ d1shrb\_ d4h2lb\_ d4yu3b\_ d1spga\_ d3hrwa\_ d3qqra\_ d3at5a\_  
d4wchd\_ d3hyua\_ d1cg5b\_ d1uc3a\_ d1hbra\_ d2raob\_ d1outb\_ d4esab\_  
d3gdjb\_ d3qqqa\_ d1x9fc\_ d3vrfa\_ d1litha\_ d3mkba\_ d3d4xa\_ d3mjpa\_  
d1jl6a\_ d3fh9a\_ d1outa\_ d2dc3b\_ d1lit2a\_ d3eoka\_ d3g46a\_ d1qpwa\_  
d3vrfb\_ d1ch4a\_ d1x9fd\_ d1hdsa\_ d2zfb\_ d3mkbb\_ d1or4a\_ d3wtga\_  
d1a4fa\_ d3fh9b\_ d3bomb\_ d3cy5a\_ d3at5b\_ d1x9fa\_ d2oifa\_ d4lmb\_ d4lmb\_  
d1cpcb\_ d3v57a\_ d1kn1a\_ d1cpca\_ d4f0ta\_ d2vjha\_ d4po5b\_ d1eyxa\_  
d1alla\_ d4f0tb\_ d1b33b\_ d4h0mb\_ d1b33a\_ d2vjhb\_ d4lm6b\_ d2vmlb\_  
d1allb\_ d2vjta\_ d3dbja\_ d2vmla\_ d2vjtb\_ d4f0ub\_ d1f99b\_ d4rmpa1  
d1liaa\_ d1eyxb\_ d2uulb\_ d4lmsb\_ d4f0ua\_ d2bv8a\_ d1f99a\_ d2bv8b\_  
d2c7lb\_ d3dbjb\_ d4rmpb1 d1b8da\_ d4h0ma\_ d3v57b\_ d1kn1b\_ d1liab\_  
d2uula\_ d2j96a\_ g1gxs.1 g1wht.1 d2xqfa\_ d1ea5a\_ d1f6wa\_ d1dx4a\_  
d1qe3a\_ d1k4ya\_ d4qwwa\_ d2ha2a\_ d2qvba\_ d2v9za\_ d4kafa1 d1b9ra\_  
d1offa\_ d1frra\_ d3wcqa\_ d1e9ma\_ d1l5pa\_ d1wria\_ d1i7ha\_ d3av8a\_  
d1rfka\_ d3p1ma1 d3b2ga\_ d2bt6a2 d1w5qa\_ d2c1ha\_ d1ohla\_ d1l6sa\_  
d2m5ta\_ d1cqqa\_ d1wqsa\_ d5bpea\_ d2ipha\_ d1lvoa\_ d2bhga1 d3tnta\_  
d3sjia\_ d3d23a1 d2fyqa\_ d3tloa\_ d3zvea1 d2hrva\_ d3q3ya1 d4asha1  
d1e88a1 d1l6ja4 d1eaka4 d1eaka3 d1l6ja3 d1h8pa2 d1h8pa1 d3rp2a\_  
g1lucy.1 d1fuja\_ d2zchp\_ d3w94a\_ d1si5h\_ d1lo6a\_ g2pka.1 d1cgha\_  
d1kigh\_ d1a5ia\_ d3s9ba\_ d1hj8a\_ d1ao5a\_ d2anya\_ d1q3xa1 d1gvza\_  
d1azza\_ d4gsoa\_ d2f91a1 d1iaua\_ d1gdna\_ d1eufa\_ g1fiw.1 d1eq9a\_  
d4nfea\_ d2rdla\_ d1spja\_ d1elva1 d1a7sa\_ d1ekbb\_ d1pfxc\_ d1yc0a\_  
d2aiqa\_ g1fiz.1 d1fi8a\_ d4k60a\_ d4dgja\_ d1mzaa\_ d1lop0a\_ d3tjva\_  
d1pytd\_ d1sgfg\_ g1gg6.1 d2eeka\_ d1a0ja\_ d3g01a\_ d1pytc\_ d4e7na\_  
d1ddja\_ d1z8ga1 d2hlca\_ d1npma\_ d1brup\_ g1jou.1 d1sgfa\_ d1autc\_  
g2hnt.1 g1kdq.1 d1orfa\_ d3s69a\_ d4crga\_ d1fxya\_ d1bqya\_ d2ftba\_  
d1pmpa\_ d2rcqa1 d1fdqa\_ d4lkpa\_ d1sa8a\_ d1vyfa\_ d1lpja\_ d3vg7a1  
d4azqa1 d1o8va\_ d5bvqa\_ d1p6pa\_ d2qo4a\_ d1opba\_ d1yiva1 d1o1va\_  
d4bvma1 d4tkba\_ d4i3ba\_ d1bwya\_ d1ftpa\_ d1ggla\_ d4gkca\_ d1cbia\_  
d3p6da1 d1kqwa\_ d2a0aa1 d1dzka\_ d4tlja\_ d2a2ua\_ d4wfva\_ d3t1da\_  
d4iaxa\_ d3zq3a\_ d2nnda\_ d1i4ua\_ d1kxoa\_ d1bbpa\_ d1kt7a\_ d1exsa\_  
d3s26a1 d1lf7a\_ d1qfta\_ d4gh7a\_ d1z24a1 d1qabe\_ d1xkia\_ d1lew3a\_  
d3bx7a\_ d4iawa1 d1n0sa\_ d1gkab\_ d3kzaa\_ d2k23a\_ d2l9ca1 d2joza1  
d1gm6a\_ d3kffa\_ d3saoa1 d1e5pa\_ d1yupa1 d1iiua\_ d1e69a\_ d1mv5a\_  
d3g60a4 d1ewqa2 d1ji0a\_ d1qhla\_ d1v43a3 d2wmfa1 d1vpla\_ d1g2912  
d4a82a2 g1f2t.1 d2d62a1 d3tuic1 d2bbsa1 d3g60a3 d2ixea\_ d1g6ha\_  
d1sgwa1 d2qi9c\_ d3r1fa1 d3b60a1 d3d31a2 d2pzea1 g1xew.1 d1jj7a\_  
d1oxk2 d2onka1 d1wlwa\_ d1iwea\_ d1qf5a\_ d1vmaa2 d1nija1 d2p67a1  
d3ihla\_ d1okkd2 d1ls1a2 d1s1ma2 d1liona\_ d2v40a\_ d1dj3a\_ d3hida\_  
d2vola1 d2g0ta1 d1vcoa2 d1j8mf2 d1g3qa\_ d1xjca\_ d1p9ba\_ d1qzxa3  
d1ihua2 d1ihua1 d2qm8a\_ d1dj2a\_ d4ioja\_ d1cp2a\_ d1yrba2 d1hyqa\_  
d3gqba2 d1skye3 d1xp8a1 d1tf7a2 d1tf7a1 d1ye8a1 d1skyb3 d2qe7d2  
d4blta\_ d4huta\_ d3l1daa2 d4hyya\_ d2i3ba1 d1crla\_ d3j9tb2 d3ntua2

d1vdza1 d2z43a\_ d1e9ra\_ d1nlfa\_ d3ziaa2 d1n0wa\_ d1g6oa\_ d3ziad2  
d3j9ta2 d1pzna2 d3gqbb2 d2i49a\_ d1nnfa\_ d1xvxa\_ d1ursa\_ d1h3da1  
d1iuda\_ d4m1va1 d1twya\_ d3e13x\_ d2nxa0a1 d4pfua\_ d3ttma\_ d1elja\_  
d2qmwa1 d1us5a\_ d1y3na1 d1jeta\_ d1uqwa\_ d4f19a1 d2esna2 d3thia\_  
d3fasa1 d2uyeb\_ d2xwva1 d1r91a\_ d2fyia1 d1pb7a\_ d2ozza1 d1sw5a\_  
d1nh8a1 d1vr5a1 d2g29a\_ d1xs5a\_ d3lswa\_ d2z23a\_ d3w9va\_ d3tcha\_  
d1q35a\_ d1z7me1 d3q27a\_ d1p99a\_ d1ve4a1 d2i6ea1 d4mcoa1 d4n8ya\_  
d1eu8a\_ d1zbma1 d1hsla\_ d1ixca2 d1j1na\_ d1xvya\_ d1y9ua\_ d2z22a1  
d1xoca1 d4oera\_ d1wdna\_ d5f1qa1 d1xt8a1 d1i6aa\_ d4gwoa\_ d4igta1  
d1pc3a\_ d4mmpa1 d1o63a\_ d2cz1a1 d2onsa2 d4mija1 d4ok5a1 d2bmfa1  
d2bmfa2 d1yksa1 d1yksa2 d2qeqa1 d2j1qa1 d1a1va2 d1eh3a\_ d3skpa\_  
d1dtza1 d1dtza2 d1ieja\_ d1jnfa2 d1ce2a1 d1jnfa1 d1b1xa2 d1b1xa1  
d1jw1a1 d1jw1a2 d1ryoa\_ d1h76a1 d1h76a2 d1c4oa1 d2p6ra3 d2p6ra4  
d1oywa2 d1oywa3 d1wrba1 d1w36b2 d1w36b1 d1c4oa2 d3bora\_ d1t6na\_  
d2eyqa5 d2eyqa3 d2eyqa2 d2zu6a2 d1veca\_ d1uaaa1 d1w36d1 d2g9na1  
d1z3ix2 d2rb4a\_ d1hv8a1 d1hv8a2 d1t5ia\_ d1w36c2 d2j0sa2 d2j0sa1  
d1fuka\_ d3hjha1 d1z5za1 d1qdea\_ d1z63a1 d1s2ma2 d1s2ma1 d1wp9a1  
d1wp9a2 d1gm5a3 d1gm5a4 d3dina4 d3dina3 d1q0ua\_ d1w36c1 d1z3ix1  
d1nкта3 d1uaaa2 d1w36d2 g1qhh.1 d2fwra2 d2fwra1 d2v8ta\_ d3q3ma\_  
d1za0a1 d1mxra\_ d2inca\_ d1jk0a\_ d2incb\_ d1mhyb\_ d3hflb\_ d1mtyb\_  
d1r2fa\_ d2uw1a\_ d1mhyd\_ d3n37a\_ d1afra\_ d1oquc\_ d1syya\_ d1mtyd\_  
d2olza\_ d1uzra\_ d1smsa\_ d2fkza\_ d1zujal d1s3qa1 d2fjca1 d1z6om1  
d1veia\_ d4dyya\_ d1jiga\_ d3gvya\_ d2pyba\_ d4cy9a1 d3bvfa1 d1r03a\_  
d2cf7a\_ d1nf4a\_ d1zs3a1 d4iwka\_ d3ka8a\_ d3np0x\_ d1n1qa\_ d1lb3a\_  
d4e6ka\_ d1z6oa1 d2fzfa1 d4dyua\_ d3ge4a\_ d1jgca\_ d4am4a\_ d2z6ma\_  
d1ji5a\_ d1vlga\_ d1lkoal d1krqa\_ d3qz3a\_ d1o9ra\_ d2ffxj\_ d1euma\_  
d1yv1a1 d2v2pa\_ d1j30a\_ d4di0a\_ d1oewa\_ d2qzxa\_ d2asia\_ d1psoe\_  
d1miqa\_ d2h6ta\_ d1pfza\_ d1lizda\_ d3hd8a\_ d1j71a\_ d1dpja\_ d4aa9a\_  
d1t6ex\_ g1b5f.1 g1lya.1 g1htr.1 d1qdma2 d1bxoa\_ d1wkra\_ d1tzsa\_  
d1libqa\_ d2qzwa\_ d1ex4a2 d1bdqa\_ d3ggta\_ d3ixoa\_ d1mrxa\_ d2haha\_  
d1tw7a\_ d4njsa\_ d1sgua\_ d2p3da\_ d1nsoa\_ d3d3ta\_ d2rkfa\_ d1c6ya\_  
d2rspa\_ d3ogpa\_ d3ekwa\_ d2o4na\_ d2j9ja\_ d1baia\_ d3ggua\_ d3lzua\_  
d4npua\_ d4j55a\_ d2r8na\_ d2fxda\_ d2p3ca\_ d4dqa\_ d3ttpa\_ d3t3ca\_  
d2p3aa\_ d2hc0a\_ d2fdda\_ d3mwsa\_ d1js3a\_ d3rcha\_ d3k40a\_ d1k8rb\_  
d1wgra1 d1ef5a\_ d1wfyal d1e8ya3 d1wgya1 d1lfda\_ d2cs4a1 d1wxma1  
d2byea1 d3kh0a1 d2byfa1 d1wxaa1 d1e7ua3 d1wgda1 d1wggal d4q5eb\_  
d1wjna1 d1se9a\_ d3n3kb\_ d1wz0a1 d1we6a1 d2m0xa\_ d2gbka\_ d3rt3b1  
d1wh3a1 d1sifa\_ d2ekek2 d4ii2b1 d4hk2a1 d1c3ta\_ d1m94a\_ d1wgha1  
d1ttna1 d1j8ca\_ d1wx8a1 d3v6cb1 d2ma9b\_ d4i6lb1 d1bt0a\_ d2jvca1  
d1iyfa\_ d2k1fa\_ d1wxva1 d1wf9a1 d1t0ya\_ d2io0b2 d1x1ma1 d2gbma\_  
d1zw7a1 d2m17a\_ d1we7a1 d2lwpal d2gbja\_ d1wjua1 d1v6ea1 d1v86a1  
d4eewa\_ d1wiaa1 d4icva\_ d4gu2a\_ d1wx7a1 d1wy8a1 d4hjka1 d2faza1  
d1v5oa1 d3ruib\_ d3waob\_ d2r2qa1 d3m95a\_ d3wana\_ d2a13a1 d2cr5a1  
d1wj4a1 d3ubra\_ d1qo8a1 d1d4ca1 d2k3va\_ d1ft5a\_ d1qdba\_ d1mlqa\_

d2j7aa\_ dlh21a\_ dlogyb\_ d4fasa\_ dljnia\_ dlsp3a\_ d4lu0a\_ dlof8a\_  
d3unda1 d3e9aa1 dlvr6a2 dln8fa\_ d2qkfa\_ dlo60a\_ d3h33a\_ dlrwja\_  
d19hca\_ dlos6a\_ d3bxua\_ d3h4na\_ dli77a\_ d3caoa\_ dlj0pa\_ d2ctha\_  
d1duwa\_ dlofwa\_ d2e84a\_ dlhh5a\_ d3h34a\_ gly43.1 dlum8a\_ dlizxa\_  
dlqvra2 dlqvra3 dlxj2c2 dljr3d2 d2p65a\_ dl18qa2 dlg8pa\_ d3hu3a3  
dlxj2d2 dl1njfa\_ dl1n4a2 dlxj2a2 dl1tuea1 d2ce7a2 dlw5sa2 dlxj2b2  
dl1d2na\_ dl1ny5a2 dl1ofha\_ d2gnoa2 d2a5yb3 dlfnna2 dl1u0ja1 dl1lv7a\_  
dl1qpa2 d2fnaa2 dl1ixsb2 d4gita\_ dl1sxje2 dl1g41a\_ d2e3fa\_ d2e3ea\_  
d21lda\_ d2ny8x\_ d2e3ga\_ d2ny9x\_ d2nz3a\_ d21j7a\_ d2m8bb1 d2kyqa\_  
d3psma\_ dl1jkza\_ dl1jxca\_ d2g11a\_ dl1ugla\_ d4uj0a\_ d2k4ua\_ dl1hp2a\_  
d2lu9a\_ dl1baha\_ d2meoa1 dl1wm7a\_ dl1hlya\_ dl1n8ma\_ dl1jlza\_ dl1wpda\_  
dl1c55a\_ dl1pvza\_ dl1wt7a\_ dl1wz5a\_ dl1m2sa\_ dl1pjva\_ dl1c49a\_ dl1qkya\_  
d2ktca1 dl1wmta\_ dl1du9a\_ dl1j5ja\_ dl1rlga\_ dl1t0za\_ d2i61a\_ dl1t1ta\_  
dl1sn4a\_ dl1kv0a\_ d21kba\_ dl1npia\_ dl1wwna\_ dl1pe4a\_ d2kbka\_ d2li7a\_  
dl1djta\_ d2kbha\_ dl1dq7a\_ dl1sega\_ dl1omya\_ dl1zywa1 dl1jzaa\_ dl1bbua1  
dl1eloal dl1c0aa1 dl1b8aa1 dl1l0wa1 d3a74a1 dl1eova1 dl1t61c1 dl1iyjb4  
dl1iyjb5 dl1iyjb3 dl1o7ia\_ d4ipca1 dl1x3ea\_ d4apva\_ dl1jb7a1 dl1jb7a2  
dl1jb7a3 d3kdfa\_ dl1ue1b\_ dl1wjja1 d3eiva\_ dl1xjva2 dl1xjva1 d2ccza2  
dl1se8a\_ dl1l1oc\_ dl1jb7b\_ dl1qvca\_ dl1qzga\_ dl1miua4 dl1miua5 dl1miua3  
d3g48a1 dl1gd7a\_ dl1jjcb3 dl1pyba\_ dl1y14b1 d2nn6i1 dl1i94l\_ d2zjra2  
dl1smxa\_ d2qamc2 dl1hh2p1 d2r7da1 dl1rl2a2 dl1wfqa1 d3bzka4 dl1x6oa2  
d3a0ja\_ d2j01d2 d2ja9a1 d4q15a\_ dl1hr0w\_ dl1luza\_ d2n3sa\_ d2vnud1  
dl1h95a\_ dl1go3e1 d2nn6h1 dl1ne3a\_ d2mo1a\_ dl1iz6a2 dl1jjga\_ dl1e3pa2  
d2ix0a3 d2ix0a2 d21xja\_ dl1ueba3 dl1ueba2 d2z0sa1 dl1u01a1 d2ix0a1  
d2eifa2 d2je6i1 d3i2za1 d2c35b1 d2ahob2 dl1t9ha1 d3i4oa\_ d2qall1  
dl1jt8a\_ d2nn6g1 d3cama\_ dl1i94q\_ dl1c9oa\_ dl1d7qa\_ d2ba0a1 d2vnud2  
d2vnud3 dl1khia2 d2qalq1 dl1wi5a1 dl1xtda2 dl1ny4a\_ dl1dgsa2 dl1fvial  
dl1ckma1 dl1p16a1 dl1x9na2 dl1rpma\_ d2shpa1 dl1yfoa\_ dl1l8ka\_ d2ooqa1  
dl1g4us2 dl1p15a\_ dl1lara2 dl1lara1 dl1wcha\_ d2fh7a2 d2fh7a1 dl1ohea1  
dl1ohea2 d2f4da\_ dl1rxda\_ d2hxpa\_ dl1xria\_ dl1d5ra2 dl1fpza\_ d3ezza\_  
d4y2ea\_ dl1i9sa\_ d3azya\_ d3wvja\_ dl1upsa1 dl1ajoa\_ d2hyka\_ dl1ajka\_  
d2vy0a\_ dl1o4ya\_ d3o5sa\_ d3d6ea\_ d3atga\_ dl1dypa\_ d3i4ia\_ dl1c1la\_  
d4lbqa\_ dl1a78a\_ dl1slta\_ d4no4a\_ d3zsjja\_ d3duia\_ dl1g86a\_ dl1qmja\_  
dl1hlca\_ dl1tdha3 dl1q3ba3 dl1ee8a3 dl1k82a3 gl1qmo.1 gl1len.1 d3zyra\_  
dl1fnya\_ dl1n47a\_ g2ltn.1 dl1avba\_ d3usua\_ dl1dhkb\_ dl1f9ka\_ dl1ukga\_  
dl1g8wa\_ dl1g9fa\_ dl1wbfa\_ d3wcsa\_ dl1g7ya\_ gl1loe.1 dl1mvqa\_ dl1hq1a\_  
dl1v6ia\_ dl1dbna\_ dl1qnwa\_ dl1fx5a\_ dl1l8qa\_ dl1ioaa\_ d3n35a\_ dl1epwa1  
dl1eysc\_ d2h0ba\_ d2erfa\_ dl1h30a2 d3mw4a1 dl1pz7a\_ d2r1ba\_ d3v64a1  
dl1d2sa\_ d3bopa1 d3mw3a1 dl1okqa1 dl1okqa2 dl1dszb\_ dl1a6ya\_ d3cbba\_  
dl1ynwa1 dl1r4ia\_ dl1hcqa\_ d2hana\_ d2hanb\_ d2enva1 dl1kb4b\_ d2n11b\_  
dl1lola\_ dl1cita\_ dl1adqa1 dl1fnga1 dl1uvqb1 dl1zs8a1 d2vola1 d2vola2  
dl1mfb12 d2jelh2 dl1uwel2 d3qq4b1 dl1kjbv\_ dl1k5na1 dl1osph2 d4odh12  
dl1ow0a1 dl1ow0a2 dl1bfob2 d3l9ra2 d3jtth1 d2fath2 d4elkb2 dl1fn4b2  
d2xfxb\_ dl1pg7x2 dl1cqka\_ d4k71b2 dl1lk2a1 dl1eapb2 d4l1fhg2 dl1i4fa1

d2nw2a2 d1kfah2 d1mhca1 d1h3ua1 d1wejh2 d1h0db2 d1a5fh2 d1kcvh2  
d1mjuh2 d1qqda1 d1kcrh2 d1k8ia1 d3huja2 d2nnab1 d1nfd2 d3mffb2  
d1s9va1 d11k3h2 d1q0xl2 d1fv1b1 d1neza1 d4rfeb2 d1r3ha1 d1a6tb2  
d1kjva1 d1pz5b2 d1onqa1 d2bc4a2 d1de4a1 d1k8da1 d1tcra2 d1dn0b2  
d1nfde2 d2xwtb2 d1bfoa2 d1mexh2 d1iakb1 d1ypzf2 d4f7ea2 d1q72l2  
d2fbjh2 d1fe8h2 d1clzh2 d1fngb1 d1uvqa1 d1vgka1 d1c16a1 d4j12a2  
d4x99b2 d1igtb3 d1je6a1 d1q72h2 d1nldh2 d1teth2 d2hmic2 d1l1ca2  
d1l1ca1 d1k8ib1 d1q0yh2 d1kfa12 d3frua1 d1pg7w2 d1u58a1 d1igyb4  
d1igyb3 d1hyrc1 d1klub1 d1deeb2 d1c12b2 d2bc4b2 d2ig2h2 d1kcvl2  
d3wn5b1 d11k2b\_ d11k3l2 d1mjul2 d1sm3h2 d1q0xh2 d1zvsal d1ydpal  
d1u8ib2 d1ypze2 d1kcu2 d1op9a\_ d1y0la1 d1etzb1 d1legj11 d2gsib1  
d1nj9a1 d4jfhd1 d1aqk11 d1t2ja\_ d1lo4h1 d1zvya1 d3v4vl1 d4enec1  
d1kxtb\_ d5e8ea1 d2pxya\_ d4weud\_ d1xiwc\_ d2esvd1 d1qznh\_ d1logae1  
d1f4xh1 d4n1hb\_ d3ezjb1 d3mlw11 d1kfah1 d1etza1 d1b4jh1 d3cfic\_  
d4w68a\_ d2arja1 d1ek3a\_ d2ok0l1 d1vera\_ d1uwgh1 d1blnb1 d1fpth1  
d1rzga1 d2giya1 d4m3kb1 d1nc2a1 d2nyyd1 d1ncna\_ d1fbih1 d5dxwa\_  
d4fqqa1 d1dqdh1 d1jfq11 d1kelh1 d1faih1 d1frgl1 d1figl1 d4m6n11  
d1fo0a\_ d4hxb11 d3b5ga\_ d3quyd1 d2h9gb1 d1i8kb\_ d2dd8h1 d2ck0h1  
d1eaja\_ d4w6wb1 d2a6ib3 d1t66d1 d2e27h\_ d1ob1b1 d1f11b1 d2v7na1  
d1ad0a1 d2xt1b1 d1pskh1 d4i13b1 d2op4l1 d1a0q11 d1luwel1 d1za3a1  
d1ncb11 d4uu9a\_ d1bm3h1 d1cloh1 d1nqba2 d1cf8h1 d4y5va\_ d1mhph1  
d5anma1 d4cdgc1 d4ldeb\_ d1y0lb1 d2pcpb1 d1z3gl1 d1dfb11 d1fh5h1  
d3g5xa1 d1tzib1 d4dn3l1 d3zhka1 d2b1hh1 d2uyla1 d1f3dh1 d1nj9b1  
d2agjh1 d2h1pl1 d1q72h1 d8fabb1 d1ndmb1 d1rjca1 d4u6hb1 d3upca\_  
d2fbj11 d1osph1 d1tvda\_ d2cjvh\_ d4fhbd1 d1bd2d1 d1rz7h1 d3nn8a\_  
d1blna1 d1knoa1 d1nfda1 d2bmkb1 d1dq11\_ d1igyb1 d1igf11 d12e8h1  
d3utza1 d1nc2b1 d1rihh1 d4mwfb1 d4jvpa1 d1mieh1 d1rhfa1 d1fgn11  
d1sbs1 d1lp9e1 d1dn0a1 d4lqf11 d1iaih1 d1kgcd1 d1mh5b1 d1gp011  
d2g60h3 d1f8t11 d2jixd1 d4grwh\_ d1fo0b\_ d1bfob1 d1axsa1 d1u9ka\_  
d1nmbh\_ d1h8na1 d1h8na2 d1jguh1 d4eura1 d3sdy11 d35c8h1 d1w72l1  
d1mvub\_ d1i9rh1 d1ob1a1 d4wenb\_ d1yeeh1 d3ietc1 d1f58h1 d1ad0b1  
d1mqk1\_ d1nbvh1 d4b50a\_ d3r8bb\_ d1baf11 d1mamh1 d4rgne1 d2gsgb\_  
d35c8l1 d1bafh1 d1ai1h1 d2pcpa1 d2fath1 d2x1pa\_ d1orsb1 d1ibgl1  
d1shma\_ d1a2yb\_ d1u0qa\_ d2coqa\_ d1hilb1 d1qfwi\_ d1jv5b\_ d1fn4b1  
d5e0qa\_ d1nsnh1 d1plgl1 d4ocxl1 d1kb5h1 d1rzfh1 d1pg7x1 d2fx7h1  
d2oi9c\_ d117i11 d3eyva1 d1d5i11 d4ffyl\_ d1tet11 d1a6wh\_ d1ac6a\_  
d3dvfa\_ d1nfde1 d1mimh1 d1ri8a1 d1jhlh\_ d3dura\_ d1fskb1 d1f97a1  
d3so3b1 d2ak4d1 d1lp9f1 d4z7wf1 d1l7th1 d4y5ya\_ d4x7ec1 d1emth1  
d1ikf11 d1nlbh1 d4utal1 d1bjma1 d1eapb1 d1u6ah1 d2dtgd1 d1kj2b\_  
d1xeda1 d1c1eh1 d1fgvh\_ d2bnub1 d2fb4h1 d2dtgb1 d1ktrh\_ d1jpth1  
d1qkz11 d4hepg\_ d2atpb1 d1flrh1 d2hrpl1 d1mvfa\_ d1iaim1 d3k80a1  
d2jb5h1 d3zkxc\_ d4grwe\_ d1it9h1 d1rhhb1 d3w9ec\_ d1e4wh1 d1sy6h1  
d2j6eh1 d3qxta\_ d1jglh1 d1p7ka1 d1tzhb1 d4n8pa1 d1gaf11 d2jelh1  
d1wioa2 d4i0cc1 d1cicb1 d1lmka2 d1lmka1 d1iqwh1 d1lorqb1 d1ejoh1



d1jnlh1 d4zgl1a\_ d43c9b\_ d1ggbl1 d1wejh1 d3q6fa1 d1f3dj1 d3c6la1  
d1bqlh1 d3p9wb\_ d1a3r11 d1h0db1 d2uzil\_ d1eo8l1 d1qfwl\_ d1n7ml1  
d1ligja1 d1c5ch1 d2a9mh\_ d1rmfh1 d1fj1b1 d4heme\_ d1ccza1 d1a5fh1  
d1logad1 d1dlfh\_ d1qa9b\_ d1vgel1 d3qskb\_ d1sjxa\_ d4ozfg1 d1sq2n\_  
d1qd0a\_ d1kcvh1 d1c5db1 d3qcull1 d3bn9d1 d1mjuh1 d4y8dc\_ d7fabh1  
d3dvgb1 d1lo0l1 d1a6tb1 d1gigh1 d1kcrh1 d2hwz11 d1yjdc1 d3clfl1  
d4krna\_ d1dl7l\_ d1e6ol1 d1mexh1 d3r0ma\_ d4kkna\_ d1fnsl1 d1loaqh\_  
d1rzia1 d1lucbh1 d1ncwl1 d4b41a\_ d1nfd1 d2mpah1 d2d7t11 d4grwf\_  
d4b5ea\_ d1l1k3h1 d3u79a\_ d4u3xa\_ d1ghfl1 d1bvkb\_ d1mcww1 d1b88a\_  
d1jrrhh1 d32c2b1 d4wemb\_ d1dsfh\_ d1op3h1 d1cell1 d1iqda1 d1qoka1  
d1qoka2 d1qfuh1 d2crya1 d1ay1h1 d1loaq1\_ d3ab0b\_ d1rurl1 d1t4kb1  
d1bz7b1 d1n0xh1 d1for11 d1lucb11 d4w6yb\_ d43c9a\_ d2aab11 d1tzia1  
d4n1ca\_ d1k6qh1 d3g9ab\_ d4tvsa1 d1ligmh\_ d1pz5b1 d3dx9a1 d3wxwh\_  
d1nakh1 d1kcul1 d3eaka\_ d4qlra1 d1cr9l1 d1d9ka\_ d1f4x11 d1deea1  
d2i27n2 d1c12a1 d2orb11 d1j8hd1 d1mcph1 d1c5da1 d1kenh1 d1bd2e1  
d1h5ba\_ d4x7fc1 d3upaa\_ d1t3fa1 d1indh1 d2dtgc1 d4hc111 d1zv5a1  
d4wgvb\_ d1uwgl1 d4f37k1 d1aqkh1 d1vesa\_ d3zkqd\_ d1fpt11 d1lo4l1  
d1knob1 d3rrqa\_ d1ct8b1 d4orz\_ d1mlbb1 d4hgkc1 d1dqdl1 d1bogb1  
d4ozhe1 d1dr9a1 d1i7za1 d1dn0b1 d1kell1 d1rzib1 d1ypzf1 d1wtla\_  
d1hkfa\_ d1fail1 d1figh1 d2vyre\_ d1sjva\_ d1ohqa\_ d1bfoa1 d1pkqb1  
d1mjul1 d1b4j11 d1nsn11 d2arjb1 d1p4bh\_ d4aj0a\_ d3nn8b\_ d2rcja1  
d1f2xk\_ d4v1dd\_ d1adqh1 d2eksa\_ d4k3ga\_ d1jfqh1 d1uweh1 d1frgh1  
d4gftb\_ d1uz8b1 d4n1ea\_ d1bm3l1 d1clol1 d3mcka1 d2vq1a1 d1ae6h1  
d4aq1b1 d1uj3b1 d1nbqa1 d1fh5l1 d2ck0l1 d2ywza\_ d1q72l1 d4nbxb\_  
d1hila1 d4hz1b1 d2j88l1 d1zmya1 d1cd0a\_ d1a4ka1 d1pskl1 d1a0qh1  
d4krmb\_ d1ncbh1 d2fbjh1 d1j8he1 d1i3ua\_ d1cf8l1 d1fe8h1 d2plya1  
d1eeqa\_ d2x89a\_ d1ol0a\_ d2r0lh1 d1ub5a1 d1dfbh1 d3eyvb1 d4jdvb1  
d4p2cg\_ d2gsia1 d2agj11 d1u3ha1 d2h1ph1 d1rihl1 d1fskc1 d1boga1  
d2a77l1 d1ospl1 d1qfoa\_ d3dwta\_ d2fx7l1 d1rz7l1 d3stba1 d1pkqa1  
d1b6da1 d1dzba2 d1dzba1 d1kj2a\_ d4l1ha\_ d1rzgb1 d1dq1h\_ d12e8l1  
d1mie11 d1jmaa\_ d1sbs11 d1fgnh1 d1f58l1 d1mqkh\_ d1ndgb1 d3qegl1  
d1iaill1 d2aw2a1 d1tqbc1 d3fo2a1 d4dkaa\_ d1f8th1 d2g60l1 d2ywya\_  
d1uj3a1 d1yc7a\_ d3bd3a\_ d4w6xb1 d1nmb1\_ d1i8ka\_ d1rjlb1 d1ypze1  
d1p7kb1 d1kxqe\_ d1gpoh1 d2z4qa1 d1w72h1 d1i9rl1 d4qgya1 d4xt1c\_  
d2qqnh1 d1cica1 d3c08h1 d2cd0a\_ d2bdnh1 d1hnga1 d1mam11 d1nldh1  
d1cr9h1 d4lcih1 d3bkyh1 d3qg7l1 d1ai111 d1kxvc\_ d4iosd\_ d1l7ih1  
d2x1qa\_ d1ub6b1 d3k74b\_ d1ibgh1 d1teth1 d1igya1 d1hxma1 d2x6ma\_  
d2e7la\_ d5e03a\_ d1qfwm\_ d2r0kh1 d1igjb1 d1rurh1 d1plgh1 d1mj8h1  
d1yuhb1 d3fmg11 d1rzfl1 d1emtl1 d1ad9b1 d1igtb1 d1nlbl1 d1d5ih1  
d3k7ua\_ d4ffyh\_ d1bwwa\_ d3dvga1 d1a6ta1 d1fgvl\_ d4qxgl1 d1mim11  
d1jhl1\_ d2hffb1 d2hh0l1 d1qkzh1 d1l7t11 d1afvh1 d1iaii1 d2cjuh\_  
d1um5h1 d2ghwb2 d2ghwb1 d1kgce1 d2fgwh1 d1ikfh1 d1dvfd\_ d2i24n1  
d2xtjb\_ d1za3b1 d2yc1a\_ d2hh0h1 d2x1oa\_ d1bvka\_ d1rjla1 d5e7ba1  
d1igta1 d1il1b1 d2fb4l1 d1mvua\_ d1jpt11 d32c2a1 d1fvca\_ d1iqdb1

d2hrph1 d2p4ab\_ d4qo1a\_ d1p2cb1 d1wt5c\_ d1t4ka1 d5c1mb\_ d1it9l1  
d1bz7a1 d1b2wh1 d1e4wl1 d1jnl11 d1yedb1 d1za6b1 d3u7aa\_ d1igfh1  
d3gnm11 d1orsa1 d1wejl1 d1a2ya\_ d1hxmb1 d1gafh1 d2j4wh1 d1pz5a1  
d1j05a\_ d1a3rh1 d4fq1l1 d1qfwh\_ d1eo8h1 d1n7mh1 d4s11a\_ d1kegh1  
d5da4a\_ d1iqw11 d3whxb1 d1vgeh1 d1deeb1 d1c12b1 d1t2q11 d1ad9a1  
d3gsnb1 d3b2uc1 d1ggbh1 d1t3fb1 d1nak11 d4ocmc\_ d1lila1 d2v7hb3  
d2esve1 d1mcoh1 d2qr0b1 d2q3aa\_ d1ct8a1 d1kcrl1 d2pxyb\_ d2uzih\_  
d5c3ld\_ d3durb\_ d1c5cl1 d2ak4e1 d1d17h\_ d1xiwd\_ d1mlba1 d1rmfl1  
d1i7zb1 d1dlfl\_ d2xa3a\_ d5bq7b1 d1dqqb1 d3h42l1 d1legjh1 d1kcvl1  
d1fe8l1 d2j6e11 d1f3rb2 d1l1k3l1 d1sm3h1 d1q0xh1 d1ghfh1 d7fabl1  
d1igch1 d1lo0h1 d4idla\_ d5c2bl\_ d1jrh11 d1il1a1 d3zhda1 d4kfzc\_  
d1b0wa\_ d1e6oh1 d1mexl1 d4krpb\_ d1fnsh1 d1ncwh1 d4hgma\_ d4eigb1  
d4rzca\_ d2mpa11 d4y5xa\_ d5en2b1 d3lrga1 d4ej1c1 d1rha1 d1j05b\_  
d1forh1 d1q9wb1 d2wzpd\_ d2aq2a1 d1h0da1 d3revb1 d2ij0c1 d1tzh1  
d4m7j11 d1k6q11 d3b9kc1 d1igml\_ d3qeua1 d1dsfl\_ d1celh1 d1kcu1  
d1zvha1 d1zvoa1 d1tqbb1 d1ay1l1 d2qscl1 d2cgrh1 d1nl0h1 d1ken11  
d3eo0a1 d4n9ob1 d1n0xl1 d3k1kc\_ d1c4qa\_ d1prtc1 d2wv6d\_ d1prtf\_  
d4l63b1 d1r4pb\_ d1prtd\_ d1t10f\_ d2bosa\_ d1prtb1 d3chbd\_ d2aq2b1  
d1ck1a1 d1enfa1 d1i4pa1 d1vloa1 d1et9a1 d1esfa1 d2g9hd1 d4ohja1  
d1klud1 d1bxta1 d1eu3a1 d1ty0a1 d1fnua1 d2cqva1 d1fhga\_ d2k1ma\_  
d2dl2a1 d1biha3 d1biha1 d1biha4 d3qp3a1 d1glca\_ d1gxea\_ d1cvsc2  
d1cvsc1 d1xmwa2 d1m4ka2 d2otpa2 d1biha2 d1rhfa2 d2fcba2 d2fcba1  
d1wwbx\_ d1gsma2 d1lepfa1 d1lepfa2 d2dava1 d1waaa\_ d1f97a2 d1x44a1  
d1vcaa2 d1fnla2 d1fnla1 d3b5ha2 d3h8na2 d3h8na1 d1jbj1 d1jbj2  
d1pd6a\_ d1f2qa2 d1f2qa1 d3cx2a\_ d1nbqa2 d3b5ha1 d1n26a1 d1xiwb\_  
d1xaua\_ d1fltx\_ d2ifga1 d1olla1 d1cs6a4 d1cs6a3 d1cs6a2 d1cs6a1  
d2gw5a2 d1sy6a1 d1xiwa\_ d1lucta2 d1lucta1 d1ry7b2 d1gl4b\_ d1qz1a3  
d1olza1 d2c9aa1 d1wwca\_

**Family-15 (a.39.1.8)**

**Positive dataset contains 2 protein sequences.**

d1y1xa\_ d4usla\_

**Negative dataset contains 4047 protein sequences.**

d1xfda2 d1m32a\_ d1libja\_ d1c7na\_ d1liuga\_ d4q75a\_ d2bkwa1 d1t3ia\_  
d1n8pa\_ d1qz9a\_ d1jff9a\_ d1leg5a\_ d1p3wa\_ d3kgwa\_ d2ctza1 d1vjoa\_  
d2rfva\_ d1gc0a\_ d1cs1a\_ d1d2fa\_ d2ch1a1 d1qgna\_ d1pffa\_ d1elua\_  
d1u08a\_ d1lc5a\_ d2ay1a\_ d1bw0a\_ d3pd6a\_ d7aata\_ d2csta\_ d1j32a\_  
d1fg7a\_ d4wlha\_ d1o4sa\_ d1v2da\_ d1gdea\_ d1m6sa\_ d1v72a1 d1svva\_  
d1ajsa\_ d1wsta1 d2f8ja2 d1l1k9a\_ d1vp4a1 d1xi9a1 d2gb3a1 d1yaaa\_  
d2bnma2 d1xkta1 d2hfka\_ d1jmkc\_ d5d3ka\_ d1ax4a\_ d2v1pa1 d2ez1a\_  
d1i26a\_ d1ddla\_ d1e57b\_ d1f56a\_ d1bypa\_ d1azca\_ d1ws8a\_ d3u25a\_  
d1cuoa\_ d1lid2a\_ d1rkra\_ d2iaac\_ d4dp1x\_ d1nwpa\_ d2gima\_ d2i7sa\_  
d1qhqa\_ d1gyca3 d1hfua2 d1kbva1 d1kbva2 d1sdda1 d1sdda2 d1gyca1  
d1gyca2 d1mzya1 d2bw4a1 d1aoza1 d1aoza3 d1kyaa2 d1kyaa3 d1kyaa1  
d1mzya2 d4e9sa1 d1sddb1 d1sddb2 d1hfua1 d1hfua3 d1oe1a2 d1oe1a1

d1v10a2 d1v10a3 d1v10a1 g1f8v.1 d1novc\_ d2bbvc\_ d2cfba1 d1dfoa\_  
d1o69a\_ d1bj4a\_ d3k28a\_ d2bwpa\_ d3lg0a\_ d2fnua\_ d3ou5a\_ d1z7da1  
d1b9ha\_ d1iaya\_ d4msoa\_ d1bs0a\_ d1s0aa\_ d1sffa\_ d3tqxa\_ d1mdoa\_  
d3qboa\_ d3pgya\_ d1bjna\_ d2dkja\_ d1ejia\_ d1vefa1 d4wxga\_ d3bs8a\_  
d3gbxa1 d1w23a\_ d1a3qa1 d1iknc\_ d3brda1 d1p7h11 d1oy3c\_ d1imhc1  
d1gjia1 d1zk9a1 d2cxka1 d2bema\_ d1pama1 d1ea9c1 d1qhoa1 d2fhfa2  
d2fhfa1 d1k3ia1 d1j0ha1 d1cxl1a1 d2bhua1 d1flsa2 d1lut9a2 d1gvia1  
d1txka1 d4alac\_ d1pjwa\_ d1s6na\_ d3uzqb\_ d2phla2 d2phla1 d1fxza2  
d1fxza1 d1uija1 g1dgw.1 d2v09a\_ d1uika2 d1uika1 d1dgua\_ d1ep0a\_  
d2pa7a1 d1wlta1 d1nxma\_ d2c0za1 d1ds6b\_ d1fstb\_ d1ex0a1 d1g0da1  
d4mh8a\_ d1mu2a2 d4i7ga1 d1tafa\_ d1bh9b\_ d1tafb\_ d1jfib\_ d1h3ob\_  
d2byka1 d1n1ja\_ d4g92b\_ d1bh9a\_ d1jfia\_ d1h3oa\_ d2bykb1 d1n1jb\_  
d2bjca1 d2hsga1 d1qpza1 d1efaa1 d1r0ka3 d1vkoa2 d1vm6a2 d3qvs2a2  
d1gr0a2 d1p1ja2 d2ovga\_ d1sq8a\_ d1rzs2a\_ d3kz3a\_ d3orca\_ d3gpdg2  
d2q49a2 d1hdgo2 d2g17a2 d2cvoa2 d2czca1 d3pwka2 d1obfo2 d1zyao2  
d2pkqo2 d1b7go2 d2hjsa2 d1cf2o2 d1vkna2 d1nvmb2 d1lux8a\_ d4i0va\_  
d2bkma\_ d1dlwa\_ d2bmma\_ d2msya\_ d2djoa1 d2r5za\_ d1au7a1 d1f43a\_  
d2lmda1 d1akhb\_ d1s7ea1 d3nara\_ d1zq3p1 d2craa1 d1mija\_ d4uuta\_  
d3a01a\_ d1x58a1 d3rkqa1 d3cmya1 d2cqxa1 d2da6a1 d1e3oc1 d1fjla\_  
d1mh3a1 d1ig7a\_ d1x41a1 d1wh7a1 d1gt0c1 d2mw8a\_ d1lfup\_ d1x2ma1  
d1b72a\_ d1wi3a1 d1jgga\_ d1wjha1 d1x2na1 d1mnmc\_ d2cuea1 d3k2aa\_  
d2hosa\_ d2jwta2 d1pufa\_ d1octc1 d2hi3a\_ d1b8ia\_ d4j19a\_ d3lnqa\_  
d1wh5a1 d1b8ib\_ d1fexa\_ d2cqra1 d1guua\_ d1lug2a1 d2cqqa1 d2ajea1  
d4a69c\_ d1h8ac1 d2crga1 d2iw5b1 d1xc5a1 d1ofcx1 d2cu7a1 d1wgxa1  
d2cjja1 d2ckxa1 d1gvda\_ d6paxa2 d1k78a1 d1k78a2 d1hlva2 d1iufa2  
d1iufa1 d2iu5a1 d1zk8a1 d2g7sa1 d2fd5a1 d2np5a1 d1z0xa1 d2id6a1  
d2d6ya1 d2i10a1 d1vi0a1 d2oi8a1 d3c07a1 d2ns7a1 d2fq4a1 d2yvea1  
d1t33a1 d2o7ta1 d1rкта1 d2np3b1 d2g7ga1 d2gena1 d2fbqa1 d2g7la1  
d2gfna1 d2g3ba1 d2jj7a1 d2hyja1 d1sgma1 d1ui5a1 d2hkua1 d2id3a1  
d4jyka1 d3lv8a\_ d1s3ga1 d1zaka1 d1s4qa\_ d3tvta2 d1uf9a\_ d1khta\_  
d1ckea\_ d1osna\_ d1p5zb\_ d4tmka\_ d3cm0a\_ d1jaga\_ d3h86a\_ d1t0hb\_  
d1nn5a\_ d2h92a\_ d3kb2a1 d2c95a1 d1yj5a2 d1kgda\_ d1ly1a\_ d2ak3a1  
d1vyva2 d1deka\_ d2grja1 d1p3ja1 d1y63a\_ d1e4ya1 d1s96a\_ d3iija1  
d1lvga\_ d1nksa\_ d1vyua2 d4e22a\_ d1qf9a\_ d1jjva\_ d1q3ta\_ d1ki9a\_  
d1lw7a2 d1teva\_ d1kjwa2 d1gsia\_ d1g3ma\_ d1j99a\_ d1t8ta1 d1insta\_  
d1fmja\_ d1zrha\_ d1ls6a\_ d2a3ra\_ d1aqua\_ d2zptx\_ d3ckla\_ d1texas  
d1q44a\_ d2gwha\_ d1z0ja1 d3umra2 d3gj0a1 d2gaoa1 d1yzga1 d1x3sa1  
d1g7sa4 d1puja\_ d1udxa2 d1kk1a3 d2o52a\_ d1jwyb\_ d1zcaa2 d1zcba2  
d2fv8a1 d2cjwa\_ d3dz8a1 d1xzpa2 d1vg8a\_ d4qxaa\_ d2ew1a1 d1x1ra1  
d2bcgy\_ d3doea1 d3cona\_ d3rega\_ d3wyga\_ d1upta\_ d2b6ha1 d1zd9a1  
d1lnza2 d1r5ba3 d1n0ua2 d1r2qa\_ d2f91a1 d2rhda\_ d3q3jb\_ d3q85a\_  
d1efma1 d1r8qa\_ d2gf9a1 d2akab1 d1ek0a\_ d1z08a1 d2gcoa1 d2dy1a2  
d4g01b\_ d2cxxa1 d1svia\_ d3q72a\_ d1ni3a1 d4ac9a4 d2erxa1 d2bmea\_  
d1wxqa1 d2gf0a1 d41dja1 d1zunb3 d1d5ca\_ d4lv5b\_ d1efca3 d1kmqa\_

d2g6ba1 d3lrpa\_ d1tada2 d2y8ea\_ d4rd4a1 d1z06a1 d2heia\_ d3a58b\_  
d1u0la2 d1d2ea3 d1zj6a1 d2ocba\_ d3rwoa\_ d1mr3f\_ d2e9sa1 d4u5xa1  
d2iwra\_ d2fn4a1 d3bwdd\_ d2nzja1 d2atva1 d2ksqa\_ d3l43a\_ d1mkya2  
d1mkya1 d1wmsa\_ d1jn3a3 d2rmka\_ d1f6ba\_ d1f60a3 d1gota2 d1jala1  
d2fh5b1 d1g16a\_ d2wblc\_ d1m7ba\_ d1wf3a1 d1f5na2 d1t9ha2 d1z6xa1  
d1z0aa1 d2fg5a1 d2a5ja1 d2bcjq2 d1ky3a\_ d4y0va\_ d4lhwa\_ d2qmea1  
d2atxa1 d1egaa1 d1ryha\_ d1moza\_ d1nrjb\_ d2erya1 d3bfka\_ d1puia\_  
d1fzqa\_ d3j3az1 d3t5ga\_ d1shza2 d3defa\_ d2f7sa1 d3raba\_ d3tsoa\_  
d3aq4a\_ d2a17a1 d3sfva1 d3bc1a\_ d2ncda\_ d1sdma\_ d3h4sa1 d2heha\_  
d2grya\_ g3kin.1 d1kk8a2 d1br2a2 d1goja\_ d1f9va\_ d2mysa2 d3t0qa\_  
d4db1a1 d3gbja\_ d1ry6a\_ d1v8ka\_ d1k8ka2 d1k8ka1 d3uleb1 d3i33a2  
d3i33a1 d1bupa1 d1dkgd2 d1dkgd1 d4ci6a2 d1jcfa1 d4a2ba2 d2fxua1  
d1yaga2 d1yaga1 d4cbua2 d1bupa2 d1g99a2 d2elza2 d2elza1 d1saza1  
d1saza2 d1iqca1 d1eb7a2 d1eb7a1 d1nmla2 d1nmla1 d3h1jd1 d1hroa\_  
d4gedb\_ d3zooa\_ d1mz4a\_ d1gu2a\_ d1f1fa\_ d1dvva\_ d1c6ra\_ d1c75a\_  
d1e29a\_ d1gdva\_ d1cnoa\_ d1h32b\_ d1co6a\_ d2bh4x\_ d2aiua\_ d5cytr\_  
d1jdl\_ d1i8oa\_ d2zboa\_ d3dmia\_ d1ls9a\_ d1wvec\_ d2yk3a\_ d3ph2b\_  
d1dw0a\_ d5aura\_ d1ql3a\_ d1qn2a\_ d1f1ca\_ d4zzva\_ d2xspa\_ d1leg1a\_  
d4v20a\_ d1ojja\_ d4ipma1 d1gpia\_ d4csia\_ d3pfza\_ d2yoka\_ d2nqya\_  
d1h4ga\_ d1hixa\_ d1oa2a\_ d1olra\_ d3b7ma\_ d4h7ma1 d3wp3a\_ d2vgda\_  
d1ligoa\_ d3zsea\_ d2nlra\_ d3wx5a\_ d1oa3a\_ d1pvxa\_ d1m4wa\_ d1f5ja\_  
d1oa4a\_ d1ks5a\_ d4ixla1 d3sita1 d1h32a2 d1evsa\_ d1cnt1\_ d1pvhb\_  
d1z7ca\_ d1huwa\_ d1bgea\_ d1rhga\_ d1f6fa\_ d1f45b\_ d1i1rb\_ d1axia\_  
d1etea\_ d3tgxb\_ d1scfa\_ d2z3qa1 d3qbl\_ d1hula\_ d1m48a\_ d4nkqb\_  
d1eera\_ d1v7mv\_ d5e4ea\_ d2o27a\_ d3b5ka\_ d2psma1 d4zf7a\_ d3uf5a\_  
d4x51a\_ d1d9ca\_ d4ypgc1 d3oq3a\_ d1lqsl\_ d1n1fa\_ d1aula\_ d1wu3i\_  
d3bes1\_ d3ux9a\_ d2b5ea2 d2b5ea3 d2b5ea1 d2b5ea4 d2kp1a1 d2kp2a1  
d1hyua3 d1hyua4 d1j08a1 d1j08a2 d3rbaa\_ d2qtra\_ d1nupa\_ d3l92a\_  
d1f9aa\_ d2h29a\_ d1vlha\_ d1od6a\_ d1lw7a1 d1mrza2 d4ruka\_ d2el7a\_  
d1iq0a2 d1irxa2 d1r6ta2 d1ivsa4 d2cyba\_ d1rqga2 d1j09a2 d2yxna\_  
d1f7ua2 d1h3fa1 d1ffya3 d2g36a1 d1nzja\_ d1jila\_ d1n3la\_ d1i6la\_  
d1pfva2 d1h3na3 d3n9ia\_ d3sz3a1 d1m4la\_ d2bk7a\_ d3fjua\_ d1z5ra1  
d1kwma1 d1uwya2 d2c1ca1 d1dtda\_ d1h8la2 d3sw2a\_ d1moxc\_ d1dx5i3  
d1edmb\_ d1aut12 d1aut11 d1nqlb\_ d1dval1 d1szba2 d1kigl\_ d2y5fl\_  
d1gk5a\_ d1g1sa2 d1nt0a3 d1xdtr\_ d1lmja2 d1lmja1 d1nzia2 d2wphe\_  
d1klil\_ d1pfxl2 d1pfxl1 d1p9ja\_ d1g1ta2 d1f7ea\_ d4yzub\_ d2mgpa1  
d1b9wa1 d1b9wa2 d2mgpa2 d1ob1c1 d1ob1c2 d1n1ia2 d1n1ia1 d2npra2  
d2npra1 d1m1xb4 d1m1xb5 d1s5ja2 d1qhta2 d4dlea2 d1tgoa2 d3py8a2  
d1q8ia2 d2py5a2 d1d5aa2 d1sfsa\_ d1jfxa\_ d1wkya2 d1uuqa\_ d3wh9a\_  
d4m1ra\_ d1xyza\_ d4xuya\_ d2je8a5 d4bf7a1 d3cuia\_ d1ur4a\_ d1qw9a2  
d1odza\_ d2vzsa5 d1bqca\_ d2x2ya1 d1hjqa\_ d1qnra\_ d4y7ea1 d1vjza\_  
d4k68a\_ d2v3ga\_ d4hpga\_ d1nofa2 d1nq6a\_ d1h4pa\_ d1aq0a\_ d3ziza\_  
d4bs0a\_ d1ecea\_ d1h1na\_ d1ta3b\_ d1w91a2 d1ilwa\_ d1uhva2 d1legza\_  
d7a3ha\_ d1tvna1 d3nyda1 d1ghsa\_ d2cyga1 d4xv0a\_ d2c8na2 d1w32a\_

d3emca\_ d1v6ya1 d1foba\_ d2uwfa1 d2fgla\_ d3niya1 d2c0ha1 d1rh9a1  
d1yq2a5 d1szna2 d1fa2a\_ d1pama4 d5do8a1 d1ea9c3 d2fhfa5 d1qhoa4  
d1avaa2 d1m53a2 d4m8ua1 d2gjpa2 d1lwha2 d4howa1 d1ktba2 d1j0ha3  
d3vm5a1 d2x1ia\_ d1wzaa2 d1uasa2 d2diea1 d1mxga2 d1ht6a2 d1eswa\_  
d1iv8a2 d5cpsa\_ d1ud2a2 d1zjaa1 d3gbea1 d1kwga2 d1wdpa\_ d1gcya2  
d1g5aa2 d1hvxa2 d3dhpa2 d2bhua3 d4do4a1 d3qgva1 d1e43a2 d1g94a2  
d2d3na2 d1gjwa2 d1gvia3 d1x1na1 d1r7aa2 d1tz7a1 d4c7ga2 d2gjxa1  
d1nowa1 d1yhta1 d4toqa\_ d1wb0a1 d1w9pa1 d1eoka\_ d1itxa1 d1kfwa1  
d1goia2 d1edqa2 d2gsja\_ d1hjxa1 d1vf8a1 d3wdpp1 d3wq5a\_ d4gxpa\_  
d4hz8a\_ d1e4mm\_ d3aiua\_ d1wcga1 d1qvba\_ d3ahxa\_ d1v02a\_ d2dgaa\_  
d1pbga\_ d1vffa1 d1qoxa\_ d4ha4a\_ d2w0pa\_ d2diaa1 d2e9ia2 d2e9ja1  
d2dj4a1 d2eeba1 d2diba1 d2dmba1 d2dmca1 d2d7oa1 d2ee6a1 d2d7pa1  
d2eeaa1 d2di8a1 d1wlha1 d2d7na1 d2nqca\_ d2d7ma1 d2dica1 d3cnka\_  
d2k3ta1 d2eeca1 d1qfha1 d1qfha2 d2bp3a1 d1v05a\_ d2ee9a1 d2eeda1  
d2di9a1 d1x14a1 d3vsqa\_ d2gixa1 d1p7ba1 d1b9ra\_ d1offa\_ d1frra\_  
d3wcqa\_ d1e9ma\_ d1l5pa\_ d1wria\_ d3av8a\_ d1czpa\_ d1rfka\_ d3plma1  
d3b2ga\_ d2bt6a2 d1wgqa1 d1v89a1 d2coda1 d1zc3b\_ d1wg7a1 d1u5ea1  
d1v61a1 d2coca1 d2ys1a1 d1v5pa1 d1nty2 d1wjma1 d1wila1 d1u29a\_  
d1xx0a1 d1unqa\_ d2zkmx3 d1fhoa\_ d1v88a1 d2adza1 d1x1fa1 d1p6sa\_  
d2coaa1 d1btka\_ d1v5ma1 d2x18a\_ d1dyna\_ d1x1ga1 d4kaxb\_ d2j59m1  
d1kilb2 d1xcga2 d1txda2 d1u5da1 d1dbha2 d1wlha\_ d1upqa\_ d1v5ua1  
d1foea2 d2fj1a1 d1eaza\_ d2dfka2 d2cofa1 d1kz7a2 d9ldta1 d2ewda3  
d1up7a1 d2dfda1 d1s6ya1 d1vjta1 d7mdha1 d1hyea1 d1t2da1 d1ojsa3  
d1b8pa1 d1lldna1 d1hyha1 d1civa1 d2a92a1 d1ez4a1 d1i0za1 d1y6ja1  
d1gv0a1 d1ur5a1 d1llda1 d1obba1 d1v8ba1 d1gdha1 d1l7da1 d2dlda1  
d1mx3a1 d1ygya1 d1qp8a1 d1li4a1 d2naca1 d1npya1 d3t4ea2 d1a4ia1  
d1o0sa1 d2hk9a2 d2egga2 d1b26a1 d1bvua1 d1gq2a1 d1c1da1 d1leha1  
d1gtma1 d1euza1 d1nvtal d3dona2 d1edza1 d1gpja2 d1p77a1 d1nyta1  
d1b0aa1 d1vl6a1 d1v9la1 d1txga2 d3f47a1 d1mv8a2 d2pv7a2 d1xc2a3  
d2ahra2 d4xiya1 d2f1ka2 d1pgja2 d1i36a2 d1np3a2 d1lj8a4 d1teaa3  
d1qmgga2 d2i76a2 d2g5ca2 d1wdka3 d1dlja2 d3cuma3 d1kola2 d1f8fa2  
d1qora2 d1jqba2 d1vj0a2 d1cdoa2 d1gu7a2 d1d1ta2 d1xa0a2 d2dm6a2  
d1jvba2 d1rjwa2 d1llua2 d1h2ba2 d1tt7a2 d1piwa2 d1o89a2 d1iz0a2  
d1e3ja2 d1yb5a2 d1uufa2 d1vj1a2 d1e3ia2 d3gpdg1 d1vc2a1 d2nvwa1  
d1u8fo1 d1ydwa1 d1hdgo1 d2g17a1 d1cf2o1 d2czca2 d1r0ka2 d1obfo1  
d2cvoa1 d1ebfa1 d1h6da1 d1i32a1 d1zh8a1 d2q49a1 d1qkia1 d1j5pa4  
d3pzra1 d1xeea1 d1vkoa1 d1vm6a3 d3qvsa1 d2pkqo1 d1b7go1 d1gr0a1  
d1p1ja1 d1llc0a1 d1j0xo1 d3pwka1 d2hjsa1 d1zyao1 d1vkna1 d1tltal  
d1nvmbl d3sjua\_ d3ojfa1 d1xu9a1 d2jjya1 d1n7ha\_ d1y1pa1 d1h5qa\_  
d1jtva\_ d4fs3a\_ d2bkaa1 d1gy8a\_ d2c5aa1 d1ulsa\_ d1ooea\_ d2b69a1  
d1y5ma1 d1spxa\_ d1aela\_ d1bxka\_ d1ydea1 d1gega\_ d1hdooa\_ d1o5ia\_  
d1e6ua\_ d1snya1 d2rhca\_ d3zv4a\_ d5ceja\_ d2d1ya1 d1fjha\_ d3w8ea\_  
d2fmua1 d1x1ta\_ d1rpna\_ d3ay7a1 d1k2wa\_ d1eq2a\_ d2hrba1 d3ruaa\_  
d2ew8a1 d4hwka\_ d1xgka\_ d2bd0a1 d1yo6a1 d2a35a1 d2ntva\_ d1vl8a\_

d1hdca\_ d4bkua\_ d2ag5a1 d2q45a\_ d1nffa\_ d4iy1a\_ d1zbqa1 d1kewa\_  
d1ek6a\_ d1ja9a\_ d2q46a2 d1iy8a\_ d1cyda\_ d2ptga\_ d1hxha\_ dluzma1  
d3lyla\_ d4m89a\_ d3wyea\_ d2b11a1 d1w6ua\_ d1sb8a\_ d2q2va\_ d4nr0a\_  
d1e6wa\_ d2gasa\_ d3oiga1 d2bgka1 d1mxha\_ d1vl0a1 d1rkxa\_ d1r6da\_  
d1wmaa1 d1e7wa\_ d2c07a1 d1xkqa\_ d3tzha\_ d1g0oa\_ d3lz6a\_ d1qyca\_  
d1ledoa\_ d1gz6a\_ d1oc2a\_ d1t2aa\_ d1zema1 d2xoxa\_ d1z45a2 d1geea\_  
d1p33a\_ d3lt0a\_ d4e6pa\_ d2wyua\_ d1db3a\_ d4q9na\_ d1xhla\_ d4o1ma\_  
d1fmca\_ d2uvda\_ d2gdza1 d1uaya\_ d2z1ma\_ d2o23a2 d2fr1a2 d2fr1a1  
d1qsga\_ d1qyda\_ d4zjua\_ d2a4ka1 d1ybl1a\_ d1wvga1 d1yxma1 d3f4ba\_  
d1mg5a\_ d1xg5a1 d1r55a1 d3gboa\_ d1atla\_ d1buda\_ d4q11a\_ d1quaa\_  
d1yp1a\_ d1wnia\_ g1y43.1 d4ekfa\_ d2ckga\_ d1th0a\_ d2bkra\_ d1xd3a\_  
d3ifwa\_ d1e2ta\_ d4c5pa\_ d2bsza1 d4bgfa\_ d1w4ta1 d3ulra1 d1g9ka2  
d1kapp2 d1k7ia2 d1t3ca\_ d1epwa3 d2a97a\_ d3f1ea\_ g1e1h.1 d3ioqa\_  
d1fh0a\_ d1o0ea\_ d1khqa\_ d1m6da\_ d2cb5a\_ d1cs8a\_ g8pch.1 d1s4va\_  
d2pnsa\_ d1vsna1 d1mira\_ d1iwda\_ d2oula\_ d7pcka\_ d3bwka\_ d3bcna\_  
d2p86a\_ d1pvja\_ d1pcia\_ d1gece\_ d1deua\_ d4bs6a\_ d1xkga1 d1cqda\_  
d1jqpa2 d2c0ya\_ d2bdza\_ d3p5ua\_ d1zoya1 d1qo8a2 d1d4ca2 d1chua2  
d1jnra2 d1kf6a2 d2jk6a2 d2jk6a1 d1fecal d1fecal d1lpfa1 d1lpfa2  
d1xhca1 d1xhca2 d1dx1a2 d1dx1a1 d1gera2 d1m6ia2 d1onfa1 d1onfa2  
d3lada2 d3lada1 d1w4xa1 d1w4xa2 d1gesa2 d1mo9a1 d1xdia1 d1f12a2  
d1f12a1 d1fcda1 d1fcda2 d1h6va2 d1h6va1 d1mo9a2 d1gv4a2 d1gv4a1  
d2gv8a2 d2gv8a1 d1aoga1 d1aoga2 d1hyua1 d1ebda1 d1ebda2 d3dk9a1  
d1q1ra2 d1q1ra1 d1gesa1 d1zbfa1 d2z1ha\_ d2etja1 d3qioa1 d1j11a\_  
d2e41a\_ d1j12a\_ d21sna1 d1io2a\_ d1uaxa\_ d2yv0x\_ d1mu2a1 d1lekea\_  
d1i39a\_ d1o94a2 d1lqta1 d1cjca1 d1pn0a1 d1ju2a1 d2f5va1 d3c96a1  
d2gmha1 d1pj5a2 d1gpea1 d1o5wa1 d1n4wa1 d1k0ia1 d2dw4a2 d2ivda1  
d1seza1 d2voua1 d1kdga1 d1js9c\_ d1f15b\_ d1za7a\_ d2v76a\_ d1wj1a1  
d1aqca\_ d1qqga2 d1qqga1 d1ntva\_ d1n3ha\_ d4dbba\_ d3f0wa1 d1wgua1  
d2cy4a1 d3hqca\_ d1wvha1 d1xr0b1 d3nvv1a1 d1krha3 d2h88b1 d1n62a2  
d1t3qa2 d1kf6b2 d1zoyb1 d1jq4a\_ d1ffva2 d1dgja2 d1rm6c2 d1r7ha\_  
d1faaa\_ d1wika1 d1xfla\_ d1ttza1 d2f51a1 d1ti3a\_ d1nhoa\_ d1sena\_  
d2i4aa\_ d1ep7a\_ d1zmaa1 d1fo5a\_ d3lefa1 d3diea1 d2yana1 d1z6na1  
d1oaza\_ d3zywa1 d4aj8a\_ d1nm3a1 d4fiwa\_ d1wmja\_ d4hs1a1 d1lloa\_  
d1xwaa1 d1wjka1 d2vm1a\_ d1fb6a\_ d1gh2a\_ d1h75a\_ d1nw2a\_ d1kx5b\_  
d3a6na\_ d4m6ba2 d2nqbd\_ d3wkjd\_ d2yfwe\_ d4h9na\_ d5bnxa\_ d1kx5c\_  
d3r45a\_ d1eqzb\_ d4jjnb\_ d1f66c\_ d1eqza\_ d4wnnb\_ d1kx5a\_ d1u35c1  
d1id3a\_ d2nqbc\_ d1kx5d\_ d1ku5a\_ d1b67a\_ d1um8a\_ d1lixza\_ d1qvra2  
d1qvra3 d1qzma\_ d1sxjc2 d1jr3d2 d2p65a\_ d1l8qa2 d1g8pa\_ d3hu3a3  
d1sxjd2 d1njfa\_ d1in4a2 d1sxja2 d1tuea1 d2ce7a2 d1w5sa2 d1sxjb2  
d1d2na\_ d1ny5a2 d1ofha\_ d2gnoa2 d2a5yb3 d1fnna2 d1u0ja1 d1lv7a\_  
d1iqpa2 d2fnaa2 d1ixsb2 d4gita\_ d1sxje2 d1g41a\_ d1pd212 d1nhya2  
d2a2ra2 d1k0dd2 d1f2ea2 d1gsua2 d1f3ba2 d2fhea2 d2pvqa1 d1tw9a2  
d1oyja2 d1e6ba2 d1k0ma2 d3ik7a1 d4is0a1 d1r5aa2 d1jlva2 d1m0ua2  
d3gtub2 d1z9ha2 d1okta2 d1axda2 d2gsra2 d1tu7a2 d1k3ya2 d1zgm1a

d1b48a2 d1gnwa2 d1gwca2 d2gsta2 d1glqa2 d1oe8a2 d1pn9a2 d1v2aa2  
d1fw1a2 d1duga2 d3vrda1 d3vrda2 d1fcdc2 d1fcdc1 d1h1oa2 d1h1oa1  
d1m70a2 d1a0rp\_ d1czan2 d1czan3 d1czan1 d1ig8a2 d1czan4 d1bg3a4  
d1bg3a3 d1bg3a2 d1bg3a1 d1qusa\_ d1qqya\_ d1gd6a\_ d1livma\_ d2gv0a\_  
d1iiza\_ d2z2fa\_ d1j8xa\_ d1ghla\_ d1b9oa\_ d1iyka1 d1rxta1 d1iica2  
d1iica1 d2za0a\_ d2c21a1 d1f9za\_ d2pjsa1 d1klla\_ d2i7ra1 d1ecsa\_  
d1xqaa1 d5cj3a1 d1npba\_ d1jifa\_ d2p7oa\_ d1r9ca\_ d1mpya2 d1kw3b2  
d1kw3b1 d4ghga1 d1tfza1 d3isqa1 d3isqa2 d1sqia1 d1sqia2 d1lkda2  
d1lkda1 d1mpya1 d1cjxa2 d1sp9b2 d1t47a1 d1t47a2 d1flua2 d1sp8a1  
d1sp8a2 d1flua1 d4iuaa3 d4bvva\_ d5hpga\_ d3k65a\_ d1ki0a3 d1ki0a2  
d1ki0a1 d1a0ha1 d1pmla\_ d3sp8a3 d2feba1 d1qsta\_ d2beia1 d4m3sa\_  
d1u6ma1 d1ygha\_ d1yk3a1 d3dr6a\_ d1xmta\_ d1z4ea1 d2ge3a1 d1bo4a\_  
d2fiaa1 d2jdca1 d1y9wa1 d3to7a\_ d1lwza1 d2fl4a1 d2ozua1 d2b5ga\_  
d2cy2a1 d2p0wa\_ d1cm0a\_ d4pswa\_ d1yrea1 d1yr0a1 d1m4ia\_ d2gana1  
d1yvka1 d1ghea\_ d2g3aa1 d1y7ra1 d2euia1 d1q2ya\_ d2fsra1 d1xeba\_  
d2ae6a1 d1cjwa\_ d1qsma\_ d2aj6a1 d1y9ka1 d1i12a\_ d1vkca\_ d2atra1  
d1n71a\_ d2d4pa1 d2fiwa1 d2fe7a1 d1tiqa1 d2ou2a\_ d1yx0a1 d2fcka1  
d1p0ha\_ d2j8ma\_ d2pq8a\_ d1z4ra1 d1s3za1 d1ufha\_ d2hqya1 d2hqya2  
d1ne9a1 d1lrza3 d1ne9a2 d1f37b\_ d1xvqa1 d1pn0a2 d3hy2a\_ d2cvba1  
d1o8xa\_ d1lu4a\_ d1we0a1 d2bmxa1 d2a4va1 d1psqa\_ d1xiya1 d1q98a\_  
d1n8ja\_ d1zofa1 d2ggta\_ d3tjja\_ d4je1a1 d3s9fa\_ d2zcta\_ d1qmva\_  
d1jfua\_ d2b1ka\_ d5dvba1 d2b5xa1 d2v2ga\_ d1st9a\_ d3tb2a\_ d4llra\_  
d4fh8a1 d1e2ya\_ d1knga\_ d2h30a\_ d1i5ga\_ d2z9sa\_ d2f8aa1 d1tp9a1  
d2b7ka\_ d1nm3a2 d3hvva\_ d2wfca1 d4kcea\_ d1xvwa1 d4gqca1 d3qpma\_  
d4k1fa\_ d1zzoa1 d1gp1a\_ d1prxa\_ d4od7a1 d1z6ma1 d4mcua1 d4dvca1  
d1r4wa\_ d3l9sa\_ d3rppa\_ d3kasa1 d3b1a3 d1e88a1 d1l6ja4 d1eaka4  
d1eaka3 d1l6ja3 d1h8pa2 d1h8pa1 d1etha2 d1w52x1 d2ppla1 d1hpla2  
d1lpbb2 d2oxea1 d1rp1a2 d1lys1x\_ d4hs9a\_ d1ispa\_ d1ex9a\_ d3qmma\_  
d1mixa2 d1e5wa2 d1isna2 d2a16b2 d1lgya\_ d4l3wa\_ d1llfa\_ d1gz7a\_  
d1lukca\_ d1jl1a\_ d2rhwa\_ d3ia2a\_ d1a88a\_ d4dgqa1 d1hkha\_ d1zoia\_  
d3zxha\_ d1cgla\_ d1rm8a\_ d1eaka2 d2jsda\_ d1cxva\_ d1hv5a\_ d1i76a\_  
d3p0ya1 d1igra1 d1igra2 d1n8yc2 d1n8yc1 d1m6ba2 d1m6ba1 d1dzka\_  
d4tlja\_ d2a2ua\_ d4wfva\_ d3t1da\_ d4iaxa\_ d3zq3a\_ d2nnda\_ d1i4ua\_  
d1kxoa\_ d1bbpa\_ d1kt7a\_ d1exsa\_ d3s26a1 d1lf7a\_ d1qfta\_ d4gh7a\_  
d1z24a1 d1qabe\_ d1xkia\_ d3bx7a\_ d4iawa1 d1n0sa\_ d1gkab\_ d3kzaa\_  
d2k23a\_ d2l9ca1 d2joza1 d1gm6a\_ d3kffa\_ d3saoa1 d1e5pa\_ d1yupa1  
d1iiua\_ d1jgta2 d1ofda3 d1ea0a3 d1ecfa2 d1q15a2 d1ct9a2 d1te5a\_  
d1c8nc\_ d1x36a\_ d1smvc\_ d1ng0c\_ d4sbvc\_ d1lopa\_ d1f2nc\_ d1cixa\_  
d1y29a\_ d1v7fa\_ d2jtba\_ d1d1ha\_ d1g9pa\_ d1lupa\_ d1qk7a\_ d1mb6a\_  
d2a2va\_ d1niya\_ d1i25a\_ d1hvwa\_ d2mpqa\_ d1ie6a\_ d1kqha\_ d1la4a\_  
d2mxoa1 d1koza\_ d1qk6a\_ d1emxa\_ d1lqra\_ d1c6wa\_ d1rmka\_ d1ixta\_  
d1eyoa\_ d1cna\_ d1fu3a\_ d1f3ka\_ d1fyga\_ d1rypd\_ d1irua\_ d1rypc\_  
d3unfk\_ d1rypa\_ d1j2pa\_ d1irui\_ d1j2qh\_ d3unfh\_ d1m4ya\_ d1rypb\_  
d1irug\_ d1iru2\_ d1q5rh\_ d1rypg\_ d1g3ka\_ d1iruf\_ d1q5qa\_ d1e94a\_

d1irub\_ d1ryph\_ d3ty6a\_ d1iruj\_ d1iruk\_ d1rype\_ d1irud\_ d1irue\_  
d3mi01\_ d1rypf\_ d1iruh\_ d2z3ba\_ d1iruc\_ d3mka2\_ d1irul\_ d1ny721  
d1ny722 d1a6ca3 d1a6ca2 d1a6ca1 d1pgl22 d1pgl11 d1ny711 d1mqta\_  
d1d4m3\_ d1fmd3\_ d2mev1\_ g1aym.1 d1ev13\_ d4q4w1\_ d1r1a3\_ d2x5ia\_  
d1rhi1\_ g1r1a.1 g1d4m.1 g1rhi.1 d1b35b\_ d1loopa\_ d1tme1\_ d4iv1a\_  
g1pvc.1 g1fpn.1 d1fpn1\_ d4gb31\_ d1d4m1\_ d1fmd1\_ d1ev11\_ d2wzr3\_  
g1cov.1 d1qqp3\_ g1fmd.1 d2x5ic\_ d1rhi3\_ g1oop.1 d1hxs1\_ d1fpn3\_  
d1bev1\_ g2mev.1 d1eah3\_ d1aym1\_ d1pvc3\_ d1qqp1\_ d1zba3\_ d1h8ta\_  
d3vbhc\_ g1b35.1 g1bev.1 d1hxs3\_ g1ev1.1 d1bev3\_ g1tmf.1 d1tmf1\_  
d1b35a\_ d2mev3\_ g1eah.1 g1h8t.1 d1eah1\_ d4q4w3\_ d1r1a1\_ d1aym3\_  
d1pvc1\_ d1zba1\_ d1h8tc\_ d1oopc\_ d1tme3\_ g1qqp.1 d4iv1c\_ g1tme.1  
d3ubub\_ d1egia\_ d1qo3c\_ d1v7pa\_ d1tdqb\_ d3ubua\_ d1c3ab\_ d1h8ua\_  
d3bx4b\_ d1t8ca1 d1sb2a1 d1qdda\_ d2ziba1 d3cada\_ d1j34b\_ d1jwia\_  
d1jzna\_ d1c3aa\_ d1oz7b\_ d1wmza\_ d3bdwb\_ d1hq8a\_ d1fifa1 d1dv8a\_  
d3hupa\_ d1wk1a1 d1umra\_ d2afpa\_ d3bx4a\_ d1gz2a\_ d1sl6a\_ d1v7pb\_  
d3g8ka\_ d1ixxa\_ d1j34a\_ d1jwib\_ d1g1sa1 d1y17a1 d1ja3a\_ d1fvub\_  
d3bdwa\_ d1sb2b1 d1fvua\_ d1umrc\_ d1oz7a\_ d4m17a\_ d3cfwa1 d1ypqa1  
d1g1ta1 d3fd4a\_ d3l9jc\_ d4dn8a1 d1v41b\_ d1rd11\_ d2msba\_ d4w9ta\_  
d1jvna1 d4x2ra1 d1ka9f\_ d1qo2a\_ d4axka1 d1h5ya\_ d4u28a\_ d2y88a\_  
d4wd0a\_ d1vzwa1 d2flia1 d1h1ya\_ d1tqja\_ d1tqxa\_ d4lt9a1 d3tc7a1  
d3hoja\_ d1i4na\_ d3vnda\_ d3n18a1 d1geqa\_ d3naval d1v5xa\_ d4a2ra1  
d3tc6a1 d1ujpa\_ d4ijba\_ d1xcfa\_ d1vc4a\_ d1rd5a\_ d1qopa\_ d3b5va\_  
d2r80b\_ d1cqxa1 d1cg5a\_ d1gcvb\_ d3boma\_ d2h8fb\_ d2raoa\_ d3bj1a\_  
d4hrrb\_ d2r50a\_ d3d1kb\_ d2aa1b1 d3zhwa\_ d3hf4b\_ d3gdja\_ d1jebb\_  
d3bj1b\_ d1x9fb\_ d1wmub\_ d1gcva\_ d3bcqb\_ d3d4xb\_ d1gvha1 d2dc3a\_  
d3hf4a\_ d4yu3a\_ d3k8ba\_ d1qpwb\_ d2r80a\_ d3bcqa\_ d1v4wa\_ d3wtgb\_  
d1j17a\_ d4esaa\_ d1a9we\_ d3d1ab\_ d1fsla\_ d4h21a\_ d1v4wb\_ d1mwca\_  
d1vhba\_ d1jeba\_ d1spgb\_ d1h97a\_ d1q1fa\_ d1tu9a1 d3d1aa\_ d1hdsb\_  
d3hyub\_ d2zfbb\_ d3fs4a\_ d1oj6a\_ d1shrb\_ d4h21b\_ d4yu3b\_ d1spga\_  
d3hrwa\_ d3qqra\_ d3at5a\_ d4wchd\_ d3hyua\_ d1cg5b\_ d1uc3a\_ d1hbra\_  
d2raob\_ d1outb\_ d4esab\_ d3gdjb\_ d3qqqa\_ d1x9fc\_ d3vrfa\_ d1litha\_  
d3mkba\_ d3d4xa\_ d3mjpa\_ d1j16a\_ d3fh9a\_ d1outa\_ d2dc3b\_ d1lit2a\_  
d3eoka\_ d3g46a\_ d1qpwa\_ d3vrfb\_ d1ch4a\_ d1x9fd\_ d1hdsa\_ d2zfba\_  
d3mkbb\_ d1or4a\_ d3wtga\_ d1a4fa\_ d3fh9b\_ d3bomb\_ d3cy5a\_ d3at5b\_  
d1x9fa\_ d2oifa\_ d4lmxb\_ d1cpcb\_ d3v57a\_ d1kn1a\_ d1cpc\_a\_ d4f0ta\_  
d2vjha\_ d4po5b\_ d1eyxa\_ d1alla\_ d4f0tb\_ d1b8db\_ d4h0mb\_ d1b33a\_  
d2vjhb\_ d4lm6b\_ d2vmlb\_ d1allb\_ d2vjta\_ d3dbja\_ d2vmla\_ d2vjtb\_  
d4f0ub\_ d1f99b\_ d4rmpa1 d1lliaa\_ d1eyxb\_ d2uulb\_ d4lmsb\_ d4f0ua\_  
d2bv8a\_ d1f99a\_ d2bv8b\_ d2c71b\_ d3dbjb\_ d4rmpb1 d1b8da\_ d4h0ma\_  
d3v57b\_ d1kn1b\_ d1liab\_ d2uula\_ d2j96a\_ d1ra6a\_ d1muka\_ d3gsza\_  
d1khva\_ d1te9a\_ d2xwha\_ d3uqsa\_ d3hkwa\_ d3n6ma\_ d2cjqa\_ d2xyma\_  
d1teba\_ d1te8a\_ d1u09a1 d4wfxa\_ d3tyqa\_ d2pgga1 d2xqfa\_ d1ea5a\_  
d1f6wa\_ d1dx4a\_ d1qe3a\_ d4qwwa\_ d2ha2a\_ d3c8da2 d2pbla1 d1jkma\_  
d1jjia\_ d1jjfa\_ d2h0ba\_ d2erfa\_ d1h30a2 d3mw4a1 d1pz7a\_ d2r1ba\_



d3v64a1 d1d2sa\_ d3bopa1 d3mw3a1 dlokqa1 dlokqa2 dljmx4 d1pbya3  
d1pbya4 d1ex0a4 d1g0da4 d2f4ma1 d1x3za\_ d1pv8a\_ d1w5qa\_ d2c1ha\_  
d1ohla\_ d1l6sa\_ d1f74a\_ d3l21a\_ d2e1da\_ d1to3a1 d1w3ia\_ d1sfla\_  
d1n7ka\_ d1vcva1 d4imea\_ d1wa3a\_ d2ocza1 d1f2ja\_ d3m16a\_ d2yxga\_  
d1ub3a\_ d3a5fa\_ d1fbaa\_ d1l6wa\_ d1xfba1 d1wx0a1 d1vpxa1 d1ojxa\_  
d1mxsa\_ d2a4aa1 d1xkya1 d3cq0a1 d3s1xa\_ d1f05a\_ d1fdja\_ d3cpra1  
d4d2ja\_ d1cg2a1 d1yloa2 d1y7ea2 d1y0ya3 d1lfwa1 d1vixa1 d1fnoa4  
d1vhoa2 d1ysja1 d1vhea2 d1z2la1 d2fvga2 d1vgya1 d1r3na1 d2grea2  
d1xmba1 d1rtqa\_ d3rp2a\_ glucy.1 d1fuja\_ d2zchp\_ d3w94a\_ d1si5h\_  
d1lo6a\_ g2pka.1 d1cgha\_ d1kigh\_ d1a5ia\_ d3s9ba\_ d1hj8a\_ d1ao5a\_  
d2anya\_ d1q3xa1 d1gvza\_ d4gsoa\_ d2f91a1 d1iaua\_ d1gdna\_ d1eufa\_  
g1fiw.1 d1eq9a\_ d4nfea\_ d2rdla\_ d1spja\_ d1elva1 d1a7sa\_ d1ekbb\_  
d1pfxc\_ d1yc0a\_ d2aiqa\_ g1fiz.1 d1fi8a\_ d4k60a\_ d4dgja\_ d1mzaa\_  
d1op0a\_ d3tjva\_ d1pytd\_ d1sgfg\_ g1gg6.1 d2eeka\_ g1rtf.1 d1a0ja\_  
d3g01a\_ d1pytc\_ d4e7na\_ d1ddja\_ d1z8ga1 d2hlca\_ d1npma\_ d1brup\_  
g1jou.1 d1sgfa\_ d1autc\_ g2hnt.1 g1kdq.1 d1orfa\_ d3s69a\_ d4crga\_  
d1fxya\_ d1bqya\_ d1svpa\_ d1mbma\_ d3su6a1 d1cula1 d4agka\_ d1vcpa\_  
d1q31a\_ g1n1l.1 d3e90b\_ d1ep5a\_ d3u1jb\_ d3gv5b1 d1t94a2 d3bq0a2  
d3lgia\_ d3i77a\_ d2z9ia2 d4nsva\_ d1lcya2 d4jcna\_ d1agja\_ d1os8a\_  
d1hpga\_ d1l1ja\_ d1qtfa\_ d1e69a\_ d1mv5a\_ d3g60a4 g1ii8.1 d1ewqa2  
d1qhla\_ d1v43a3 d2wmfa1 d1vpla\_ d1g2912 d4a82a2 g1f2t.1 d2d62a1  
d3tuic1 d2bbsa1 d3g60a3 d2ixea\_ d1g6ha\_ d1sgwa1 d2qi9c\_ d3rlfa1  
d3b60a1 d3d31a2 d2pzea1 g1xew.1 d1jj7a\_ d1oxk2 d2onka1 d1wlwa\_  
d1iwea\_ d1qf5a\_ d1vmaa2 d1nija1 d1np6a\_ d2p67a1 d3ihla\_ d1okkd2  
d1ls1a2 d1slma2 d1liona\_ d2v40a\_ d3hida\_ d2vo1a1 d2g0ta1 d1vcoa2  
d1j8mf2 d1g3qa\_ d1xjca\_ d1p9ba\_ d1qzxa3 d1ihua2 d1ihua1 d2qm8a\_  
d1dj2a\_ d4ioja\_ d1cp2a\_ d1yrba2 d1hyqa\_ d3gqba2 d1skye3 d1xp8a1  
d1tf7a2 d1tf7a1 d1ye8a1 d1skyb3 d2qe7d2 d4blta\_ d4huta\_ d3l1daa2  
d4hyya\_ d2i3ba1 d1cr1a\_ d3j9tb2 d3ntua2 d1vdza1 d2z43a\_ d1e9ra\_  
d1nlfa\_ d3ziaa2 d1n0wa\_ d1g6oa\_ d3ziad2 d3j9ta2 d1pzna2 d3gqbb2  
d2i49a\_ d1nnfa\_ d1xvxa\_ d1ursa\_ d1h3da1 d1iuda\_ d4m1va1 d1twya\_  
d3e13x\_ d2nxoa1 d4pfua\_ d3ttma\_ d1elja\_ d2qmwa1 d1us5a\_ d1y3na1  
d1jeta\_ d1uqwa\_ d4f19a1 d2esna2 d3thia\_ d3fasa1 d2uyeb\_ d2xwva1  
d1r9la\_ d2fyia1 d1pb7a\_ d2ozza1 d1sw5a\_ d1nh8a1 d1vr5a1 d2g29a\_  
d1xs5a\_ d3lswa\_ d2z23a\_ d3w9va\_ d3tcha\_ d1q35a\_ d1z7me1 d3q27a\_  
d1p99a\_ d1ve4a1 d2i6ea1 d4mcoa1 d4n8ya\_ d1eu8a\_ d1zbma1 d1hsla\_  
d1lixca2 d1j1na\_ d1xvya\_ d1y9ua\_ d2z22a1 d1xoca1 d4oera\_ d1wdna\_  
d5f1qa1 d1xt8a1 d1i6aa\_ d4gwoa\_ d4igta1 d1pc3a\_ d4mmpa1 d1o63a\_  
d2czla1 d2onsa2 d4mija1 d4ok5a1 d2bmfa1 d2bmfa2 d1yksa1 d1yksa2  
d1jr6a\_ d2qeqa1 d2j1qa1 d1a1va2 d1eh3a\_ d3skpa\_ d1dtza1 d1dtza2  
d1lieja\_ d1jnfa2 d1ce2a1 d1jnfa1 d1b1xa2 d1b1xa1 d1jw1a1 d1jw1a2  
d1ryoa\_ d1h76a1 d1h76a2 d1c4oa1 d2p6ra3 d2p6ra4 d1oywa2 d1oywa3  
d1wrba1 d1w36b2 d1w36b1 d1c4oa2 d3bora\_ d1t6na\_ d2eyqa5 d2eyqa3  
d2eyqa2 d2zu6a2 d1veca\_ d1uaaa1 d1w36d1 d2g9na1 d1z3ix2 d2rb4a\_

d1hv8a1 d1hv8a2 d1t5ia\_ d1w36c2 d2j0sa2 d2j0sa1 d1fuka\_ d3hjha1  
d1z5za1 d1qdea\_ d1z63a1 d1s2ma2 d1s2ma1 d1wp9a1 d1wp9a2 d1gm5a3  
d1gm5a4 d3dina4 d3dina3 d1q0ua\_ d1w36c1 d1z3ix1 d1nкта4 d1uaaa2  
d1w36d2 g1qhh.1 d2fwra2 d2fwra1 d3q3ma\_ d1za0a1 d1mxra\_ d2inca\_  
d1jk0a\_ d2incb\_ d1mhyb\_ d3hf1b\_ d1r2fa\_ d2uw1a\_ d1mhyd\_ d3n37a\_  
d1afra\_ d1oquc\_ d1syya\_ d1mtyd\_ d2o1za\_ d1uzra\_ d1smsa\_ d2fkza\_  
d1zuja1 d1s3qa1 d2fjca1 d1z6om1 d1veia\_ d4dyya\_ d1jiga\_ d3gvya\_  
d2pyba\_ d4cy9a1 d3bvfa1 d1r03a\_ d2cf7a\_ d1nf4a\_ d1zs3a1 d4iwka\_  
d3ka8a\_ d3np0x\_ d1n1qa\_ d1lb3a\_ d4e6ka\_ d1z6oa1 d2fzfa1 d4dyua\_  
d3ge4a\_ d1jgca\_ d4am4a\_ d2z6ma\_ d1ji5a\_ d1vlga\_ d1lkoa1 d1krqa\_  
d3qz3a\_ d1o9ra\_ d2ffxj\_ d1yv1a1 d2v2pa\_ d1j30a\_ d4di0a\_ d1dpsa\_  
d1ex4a2 d1c6va\_ d1bdqa\_ d3ggta\_ d3ixoa\_ d1mrxa\_ d2haha\_ d1tw7a\_  
d4njsa\_ d1sgua\_ d2p3da\_ d1nsoa\_ d3d3ta\_ d2rkfa\_ d1c6ya\_ d2rspa\_  
d3ogpa\_ d3ekwa\_ d2o4na\_ d2j9ja\_ d1baia\_ d3ggua\_ d3lzua\_ d4npua\_  
d4j55a\_ d2r8na\_ d2fxda\_ d2p3ca\_ d4dqea\_ d3ttpa\_ d3t3ca\_ d2p3aa\_  
d2hc0a\_ d2fdda\_ d3mwsa\_ d1sr9a2 d1rqba2 d1h4ra3 d4yl8a1 d2a16a3  
d1wgda1 d1wga1 d4q5eb\_ d1wjna1 d1se9a\_ d3n3kb\_ d1wz0a1 d1we6a1  
d2m0xa\_ d2gbka\_ d3rt3b1 d1wh3a1 d1sifa\_ d2ekec2 d4ii2b1 d4hk2a1  
d1c3ta\_ d1m94a\_ d1wgha1 d1ttna1 d1j8ca\_ d1wx8a1 d3v6cb1 d2ma9b\_  
d4i61b1 d1bt0a\_ d2jvca1 d1iyfa\_ d2k1fa\_ d1wxva1 d1wf9a1 d1t0ya\_  
d2io0b2 d1x1ma1 d2gbma\_ d1zw7a1 d2m17a\_ d1we7a1 d2lwpa\_ d2gbja\_  
d1wjua1 d1v6ea1 d1v86a1 d4eewa\_ d1wiaa1 d4icva\_ d4gu2a\_ d1wx7a1  
d1wy8a1 d4hjka1 d2faza1 d1v5oa1 d4lu0a\_ d1of8a\_ d3unda1 d3e9aa1  
d1vr6a2 d2qkfa\_ d1d9ea\_ d1o60a\_ d2ftba\_ d1pmpa\_ d2rcqa1 d1fdqa\_  
d4lkpa\_ d1sa8a\_ d1vyfa\_ d1lpja\_ d3vg7a1 d4azqa1 d1o8va\_ d5bvqa\_  
d1p6pa\_ d2qo4a\_ d1opba\_ d1yiva1 d1o1va\_ d4bvma1 d4tkba\_ d4i3ba\_  
d1bwya\_ d1ggla\_ d4gkca\_ d1cbia\_ d3p6da1 d1kqwa\_ d2a0aa1 d1wioa4  
d1ccza2 d1vcaa1 d1dr9a2 d1lic1a1 d2d9qb1 d2nxyb2 d1adqa1 d1fnga1  
d1uvqb1 d1zs8a1 d2vola1 d2vola2 d1mfb12 d2jelh2 d1uwel2 d3qq4b1  
d1kjbv\_ d1k5na1 d1osph2 d4odh12 d1ow0a1 d1ow0a2 d1bfob2 d3l9ra2  
d3jtth1 d2fath2 d4elkb2 d1fn4b2 d2xfxb\_ d1pg7x2 d1cqka\_ d4k71b2  
d1lk2a1 d1eapb2 d4lfhg2 d1i4fa1 d2nw2a2 d1kfah2 d1mhca1 d1h3ua1  
d1wejh2 d1h0db2 d1a5fh2 d1kcvh2 d1mjuh2 d1qqda1 d1kcrh2 d1k8ia1  
d3huja2 d2nnab1 d1nfd2 d3mffb2 d1s9va1 d1lk3h2 d1q0x12 d1fv1b1  
d1neza1 d4rfeb2 d1r3ha1 d1a6tb2 d1kjva1 d1pz5b2 d1onqa1 d2bc4a2  
d1de4a1 d1k8da1 d1tcra2 d1dn0b2 d1nfd2 d2xwtb2 d1bfoa2 d1mexh2  
d1iakb1 d1ypzf2 d4f7ea2 d1q7212 d2fbjh2 d1fe8h2 d1clzh2 d1fngb1  
d1uvqa1 d1vgka1 d1c16a1 d4j12a2 d4x99b2 d1igtb3 d1je6a1 d1q72h2  
d1nldh2 d1teth2 d2hmic2 d1ilca2 d1ilca1 d1k8ib1 d1q0yh2 d1kfa12  
d3frua1 d1pg7w2 d1u58a1 d1igyb4 d1igyb3 d1hyrc1 d1klub1 d1deeb2  
d1c12b2 d2bc4b2 d2ig2h2 d1kcv12 d3wn5b1 d1lk2b\_ d1lk312 d1mjul2  
d1sm3h2 d1q0xh2 d1zvsa1 d1ydpal d1u8ib2 d1ypze2 d1kcuh2 d2lj7a\_  
d1n4na\_ d2m8bb1 d2kyqa\_ d3psma\_ d1jkza\_ d1jxca\_ d2g11a\_ d1ugla\_  
d4uj0a\_ d2k4ua\_ d1hp2a\_ d2lu9a\_ d1baha\_ d2meoa1 d1wm7a\_ d1hlya\_

d1n8ma\_ d1jlza\_ d1wpda\_ d1c55a\_ d1pvza\_ d1wt7a\_ d1wz5a\_ d1m2sa\_  
d1pjva\_ d1c49a\_ d1qkya\_ d2ktca1 d1wmta\_ d1du9a\_ d1j5ja\_ d1rlga\_  
d1t0za\_ d2i61a\_ d1t1ta\_ d1sn4a\_ d1kv0a\_ d2lkba\_ d1npia\_ d1wwna\_  
d1pe4a\_ d2kbka\_ d2li7a\_ d1djta\_ d2kbha\_ d1dq7a\_ d1sega\_ d1omya\_  
d1zywa1 d1jzaa\_ d2jcqa\_ d1n9wa1 d1bbua1 d1e1oa1 d1b8aa1 d1l0wa1  
d3a74a1 d1eova1 d1t61c1 d1iyjb4 d1iyjb5 d1iyjb3 d1o7ia\_ d4ipca1  
d1x3ea\_ d4apva\_ d1jb7a1 d1jb7a2 d1jb7a3 d3kdfa\_ d1ue1b\_ d1wjja1  
d3eiva\_ d1xjva2 d1xjva1 d2ccza2 d1se8a\_ d1l1oc\_ d1jb7b\_ d1qvca\_  
d3ulla\_ d1qzga\_ d1miua4 d1miua5 d1miua3 d1y14b1 d2nn6i1 d1i94l\_  
d2zjra2 d1smxa\_ d2qamc2 d1hh2p1 d2r7da1 d1rl2a2 d1wfga1 d3bzka4  
d1x6oa2 d3a0ja\_ d2j01d2 d2ja9a1 d4q15a\_ d1hr0w\_ d1luza\_ d2n3sa\_  
d2vnud1 d1h95a\_ d1go3e1 d2nn6h1 d2mola\_ d1iz6a2 d1jjga\_ d1e3pa2  
d2ix0a3 d2ix0a2 d2lxja\_ d1ueba3 d1ueba2 d2z0sa1 d1u0la1 d2ix0a1  
d2eifa2 d2je6i1 d3i2za1 d2c35b1 d2ahob2 d1t9ha1 d3i4oa\_ d2qa111  
d1jt8a\_ d2nn6g1 d1g6pa\_ d3cama\_ d1i94q\_ d1c9oa\_ d1d7qa\_ d2ba0a1  
d2vnud2 d2vnud3 d1khia2 d2qalq1 d1wi5a1 d1xta2 d1ny4a\_ d1dgsa2  
d1fvia1 d1ckma1 d1p16a1 d1x9na2 d2shpa1 d1yfoa\_ d1l8ka\_ d2ooqa1  
d1g4us2 d1p15a\_ d1lara2 d1lara1 d1wcha\_ d2fh7a2 d2fh7a1 d1ohea1  
d1ohea2 d2f4da\_ d1rxda\_ d2hxpa\_ d1xria\_ d1d5ra2 d1fpza\_ d3ezza\_  
d4y2ea\_ d1i9sa\_ d1eb6a\_ d3azya\_ d3wvja\_ d1upsa1 d1ajoa\_ d2hyka\_  
d1ajka\_ d2vy0a\_ d1o4ya\_ d3o5sa\_ d3d6ea\_ d3atga\_ d1dypa\_ d3i4ia\_  
g1qmo.1 g1len.1 d3zyra\_ d1fnya\_ d1n47a\_ g21tn.1 d1avba\_ d3usua\_  
d1dhkb\_ d1f9ka\_ d1lukga\_ d1g8wa\_ d1g9fa\_ d1wbfa\_ d3wcsa\_ d1g7ya\_  
g1loe.1 d1mvqa\_ d1hq1a\_ d1v6ia\_ d1dbna\_ d1qnwa\_ d1fx5a\_ d4l8qa\_  
d1ioaa\_ d3n35a\_ d3ubra\_ d1qo8a1 d1d4ca1 d2k3va\_ d1ft5a\_ d1qdba\_  
d1m1qa\_ d2j7aa\_ d1h21a\_ d1ogyb\_ d4fasa\_ d1jnia\_ d1oaha\_ d1sp3a\_  
d3h33a\_ d1rwja\_ d19hca\_ d1os6a\_ d3bxua\_ d3h4na\_ d1i77a\_ d3caoa\_  
d1j0pa\_ d2ctha\_ d1duwa\_ d1ofwa\_ d2e84a\_ d1hh5a\_ d3h34a\_ d1dszb\_  
d1a6ya\_ d3cbba\_ d1ynwa1 d1r4ia\_ d1hcqa\_ d2hana\_ d2hanb\_ d2enva1  
d1kb4b\_ d2n11b\_ d1lola\_ d1cita\_ d2dara2 d2dara1 d1wyha2 d2dloa2  
d1rutx4 d1rutx3 d2cuqa2 d1x41a2 d1x41a1 d1x3ha2 d1x3ha1 d2d8za1  
d1x61a2 d1x6aa1 d1x6aa2 d2cora2 d2cora1 d1v6ga1 d1v6ga2 d2d8za2  
d1x64a1 d1x64a2 d1b8ta1 d2co8a1 d1x63a2 d2dj7a2 d2dj7a1 d2cu8a2  
d2cu8a1 d1g47a2 d1g47a1 d1j2oa1 d1wyha1 d2dloa1 d1wiga1 d1wiga2  
d2cupa2 d2cupa3 d1x68a1 d2d8ya2 d2d8ya1 d1m3va2 d1x62a1 d1x68a2  
d1x61a1 d1b8ta3 d1b8ta2 d2d8xa2 d2d8xa1 d1x4ka1 d1x4ka2 d2cuqa1  
d1m3va1 d2co8a2 d1j2oa2 d1x63a1 d2cura1 d2cura2 d1x62a2 d1op9a\_  
d1y0la1 d1etzb1 d1legj11 d2gsib1 d1nj9a1 d4jfhd1 d1aqk11 d1t2ja\_  
d1llo4h1 d1zvya1 d3v4vl1 d4enec1 d1kxtb\_ d5e8ea1 d2pxya\_ d4weud\_  
d1xiwc\_ d2esvd1 d1qnzh\_ d1ogae1 d1f4xh1 d4n1hb\_ d3ezjb1 d3mlw11  
d1kfah1 d1etza1 d1b4jh1 d3cfic\_ d4w68a\_ d2arja1 d1ek3a\_ d2ok011  
d1vera\_ d1uwgh1 d1blnb1 d1fpth1 d1rzga1 d2giya1 d4m3kb1 d1nc2a1  
d2nyyd1 d1ncna\_ d1fbih1 d5dxwa\_ d4fqqa1 d1dqdh1 d1jfql1 d1kelh1  
d1faih1 d1frgl1 d1figl1 d4m6n11 d1fo0a\_ d4hxb11 d3b5ga\_ d3quyd1

d2h9gb1 d1i8kb\_ d2dd8h1 d2ck0h1 d1eaaja\_ d4w6wb1 d2a6ib3 d1t66d1  
d2e27h\_ d1ob1b1 d1f11b1 d2v7na1 d1ad0a1 d2xt1b1 d1pskh1 d4i13b1  
d2op4l1 d1a0ql1 d1uwel1 d1za3a1 d1ncb11 d4uu9a\_ d1bm3h1 d1cloh1  
d1nqba2 d1cf8h1 d4y5va\_ d1mhph1 d5anma1 d4cdgc1 d4ldeb\_ d1y01b1  
d2pcpb1 d1z3gl1 d1dfb11 d1fh5h1 d3g5xa1 d1tzib1 d4dn3l1 d3zhka1  
d2b1hh1 d2uy1a1 d1f3dh1 d1nj9b1 d2agjh1 d2h1pl1 d1q72h1 d8fabb1  
d1ndmb1 d1rjca1 d4u6hb1 d3upca\_ d2fbj11 d1osph1 d1tvda\_ d2cjev\_  
d4fhbd1 d1bd2d1 d1rz7h1 d3nn8a\_ d1knoa1 d1nfda1 d2bmkb1 d1dq11\_  
d1igyb1 d1igf11 d12e8h1 d3utza1 d1nc2b1 d1rihh1 d4mwfb1 d4jvpa1  
d1mieh1 d1rhfa1 d1fgn11 d1sbsh1 d1lp9e1 d1dn0a1 d4lqf11 d1iaih1  
d1kgcd1 d1mh5b1 d1gpol1 d2g60h3 d1f8t11 d2jixd1 d4grwh\_ d1fo0b\_  
d1bfob1 d1axsa1 d1u9ka\_ d1nmbh\_ d1h8na1 d1h8na2 d1jguh1 d4eura1  
d3sdy11 d35c8h1 d1w72l1 d1mvub\_ d1i9rh1 d1ob1a1 d4wenb\_ d1yeeh1  
d3ietc1 d1f58h1 d1ad0b1 d1mqk1\_ d1nbvh1 d4b50a\_ d3r8bb\_ d1baf11  
d1mamh1 d4rgne1 d2gsgb\_ d35c8l1 d1bafh1 d1ai1h1 d2pcpa1 d2fath1  
d2x1pa\_ d1orsb1 d1ibgl1 d1shma\_ d1a2yb\_ d1u0qa\_ d2coqa\_ d1hilb1  
d1qfwi\_ d1jv5b\_ d1fn4b1 d5e0qa\_ d1nsnh1 d1plgl1 d4ocxl1 d1kb5h1  
d1rzhf1 d1pg7x1 d2fx7h1 d2oi9c\_ d1l7i11 d3eyva1 d1d5i11 d4ffyl\_  
d1tet11 d1a6wh\_ d1ac6a\_ d3dvfa\_ d1nfde1 d1mimh1 d1ri8a1 d1jhlh\_  
d3dura\_ d1fskb1 d1f97a1 d3so3b1 d2ak4d1 d1lp9f1 d4z7wf1 d1l7th1  
d4y5ya\_ d4x7ec1 d1emth1 d1likf11 d1nlbh1 d4utal1 d1bjma1 d1eapb1  
d1u6ah1 d2dtgd1 d1kj2b\_ d1xeda1 d1cleh1 d1fgvh\_ d2bnub1 d2fb4h1  
d2dtgb1 d1ktrh\_ d1jpth1 d1qkz11 d4hepg\_ d2atpb1 d1flrh1 d2hrpl1  
d1mvfa\_ d1iaim1 d3k80a1 d2jb5h1 d3zkxc\_ d4grwe\_ d1it9h1 d1rhhb1  
d3w9ec\_ d1e4wh1 d1sy6h1 d2j6eh1 d3qxta\_ d1jglh1 d1p7ka1 d1tzhb1  
d4n8pa1 d1gaf11 d2jelh1 d1wioa2 d4i0cc1 d1cicb1 d1lmka2 d1lmka1  
d1iqwh1 d1orqb1 d1ejoh1 d1jnlh1 d4zga\_ d43c9b\_ d1ggbl1 d1wejh1  
d3q6fa1 d1f3dj1 d3c6la1 d1bqlh1 d3p9wb\_ d1a3r11 d1h0db1 d2uzil\_  
d1eo8l1 d1qfw1\_ d1n7ml1 d1igja1 d1c5ch1 d2a9mh\_ d1rmfh1 d1fj1b1  
d4heme\_ d1ccza1 d1a5fh1 d1ogad1 d1dlfh\_ d1qa9b\_ d1vgel1 d3qskb\_  
d1sjxa\_ d4ozfg1 d1sq2n\_ d1qd0a\_ d1kcvh1 d1c5db1 d3qcull1 d8faba1  
d3bn9d1 d1mjuh1 d4y8dc\_ d7fabh1 d3dvgb1 d1lo0l1 d1a6tb1 d1gigh1  
d1kcrh1 d2hwz11 d1yjdc1 d3clfl1 d4krna\_ d1dl7l\_ d1e6ol1 d1mexh1  
d3r0ma\_ d4kkna\_ d1fns11 d1loaqh\_ d1rzia1 d1ucbh1 d1ncw11 d4b41a\_  
d1nfdfl1 d2mpah1 d2d7tl1 d4grwf\_ d4b5ea\_ d1lk3h1 d3u79a\_ d4u3xa\_  
d1ghfl1 d1bvkb\_ d1mcww1 d1b88a\_ d1jrhh1 d32c2b1 d4wemb\_ d1dsfh\_  
d1op3h1 d1cell1 d1iqda1 d1qoka1 d1qoka2 d1qfuh1 d2crya1 d1ay1h1  
d1loaq1\_ d3ab0b\_ d1rur11 d1t4kb1 d1bz7b1 d1n0xh1 d1for11 d1ucbl1  
d4w6yb\_ d43c9a\_ d2aabl1 d1tzia1 d4n1ca\_ d1k6qh1 d3g9ab\_ d4tvsa1  
d1igmh\_ d1pz5b1 d3dx9a1 d3wxwh\_ d1nakh1 d1kcul1 d3eaka\_ d4qlra1  
d1cr9l1 d1d9ka\_ d1f4x11 d1deea1 d2i27n2 d1c12a1 d2orb11 d1j8hd1  
d1mcph1 d1c5da1 d1kenh1 d1bd2e1 d1h5ba\_ d4x7fc1 d3upaa\_ d1t3fa1  
d1indh1 d2dtgc1 d4hc111 d1zv5a1 d4wgvb\_ d1uwgl1 d4f37k1 d1aqkh1  
d1vesa\_ d3zkqd\_ d1fpt11 d1lo4l1 d1knob1 d3rrqa\_ d1ct8b1 d4orzc\_

d1mlbb1 d4hgkc1 d1dqdl1 d1bogb1 d4ozhe1 d1dr9a1 d1i7za1 d1dn0b1  
d1kell1 d1rzi1 d1ypzf1 d1wtla\_ d1hkfa\_ d1fail1 d1figh1 d2vyre\_  
d1sjva\_ d1ohqa\_ d1bfoa1 d1pkqb1 d1mjul1 d1b4jl1 d1nsnl1 d2arjb1  
d1p4bh\_ d4aj0a\_ d3nn8b\_ d2rcja1 d1f2xk\_ d4v1dd\_ d1adqh1 d2eksa\_  
d4k3ga\_ d1jfqh1 d1uweh1 d1frgh1 d4gftb\_ d1uz8b1 d4n1ea\_ d1bm3l1  
d1clo11 d3mcka1 d2vq1a1 d1ae6h1 d4aq1b1 d1uj3b1 d1nbqa1 d1fh5l1  
d2ck0l1 d2ywza\_ d1q72l1 d4nxbx\_ d1hila1 d4hz1b1 d2j88l1 d1zmya1  
d1cd0a\_ d1a4ka1 d1pskl1 d1a0qh1 d4krmb\_ d1ncbh1 d2fjbh1 d1j8he1  
d1i3ua\_ d1cf8l1 d1fe8h1 d2p1ya1 d1eeqa\_ d2x89a\_ d1o10a\_ d2r0lh1  
d1ub5a1 d1dfbh1 d3eyvb1 d4jdvb1 d4p2cg\_ d2gsia1 d2agjl1 d1u3ha1  
d2h1ph1 d1rihl1 d1fskc1 d1boga1 d2a77l1 d1ospl1 d1qfoa\_ d3dwta\_  
d2fx7l1 d1rz7l1 d3stba1 d1pkqa1 d1b6da1 d1dzba2 d1dzba1 d1kj2a\_  
d4l1ha\_ d1rzgb1 d1dq1h\_ d12e8l1 d1miel1 d1jmaa\_ d1sbsl1 d1fgnh1  
d1f58l1 d1mqkh\_ d1ndgb1 d3qeg11 d1iail1 d2aw2a1 d1tqbc1 d3fo2a1  
d4dkaa\_ d1f8th1 d2g60l1 d2ywya\_ d1uj3a1 d1yc7a\_ d3bd3a\_ d4w6xb1  
d1nmb1\_ d1i8ka\_ d1rjlb1 d1ypze1 d1p7kb1 d1kxqe\_ d1gpoh1 d2z4qa1  
d1w72h1 d1i9r11 d4qgya1 d4xt1c\_ d2qqnh1 d1cica1 d3c08h1 d2cd0a\_  
d2bdnh1 d1hnga1 d1mam11 d1nldh1 d1cr9h1 d4lcih1 d3bkyl1 d3qg7l1  
d1ai111 d1kxvc\_ d4iosd\_ d1l7ih1 d2x1qa\_ d1ub6b1 d3k74b\_ d1ibgh1  
d1teth1 d1igya1 d1hxma1 d2x6ma\_ d2e71a\_ d5e03a\_ d1qfwm\_ d2r0kh1  
d1igjb1 d1rurh1 d1plgh1 d1mj8h1 d1yuhb1 d3fmg11 d1rzfl1 d1emt11  
d1ad9b1 d1igtb1 d1nlb11 d1d5ih1 d3k7ua\_ d4ffyh\_ d1bwwa\_ d3dvga1  
d1a6ta1 d1fgvl\_ d4qxgl1 d1mim11 d1jh11\_ d2hffb1 d2hh0l1 d1qkzh1  
d1l7t11 d1afvh1 d1iaii1 d2cjuh\_ d1um5h1 d2ghwb2 d2ghwb1 d1kgce1  
d2fgwh1 d1ikfh1 d1dvfd\_ d2i24n1 d2xtjb\_ d1za3b1 d2yc1a\_ d2hh0h1  
d2x1oa\_ d1bvka\_ d1rjla1 d5e7ba1 d1igta1 d1il1b1 d2fb4l1 d1mvua\_  
d1jpt11 d32c2a1 d1fvca\_ d1iqdb1 d2hrph1 d2p4ab\_ d4qo1a\_ d1p2cb1  
d1wt5c\_ d1t4ka1 d5c1mb\_ d1it9l1 d1bz7a1 d1b2wh1 d1e4wl1 d1jnl11  
d1yedb1 d1za6b1 d3u7aa\_ d1igfh1 d3gnml1 d1orsa1 d1wejl1 d1a2ya\_  
d1hxmb1 d1gafh1 d2j4wh1 d1pz5a1 d1j05a\_ d1a3rh1 d4fq1l1 d1qfwh\_  
d1eo8h1 d1n7mh1 d4s11a\_ d1kegh1 d5da4a\_ d1iqwl1 d3whxb1 d1vgeh1  
d1deeb1 d1c12b1 d1t2ql1 d1ad9a1 d3gsnb1 d3b2uc1 d1ggbh1 d1t3fb1  
d1nak11 d4ocmc\_ d1lila1 d2v7hb3 d2esve1 d1mcoh1 d2qr0b1 d2q3aa\_  
d1ct8a1 d1kcr11 d2pxyb\_ d2uzih\_ d5c3ld\_ d3durb\_ d1c5cl1 d2ak4e1  
d1dl7h\_ d1xiwd\_ d1mlba1 d1rmfl1 d1i7zb1 d1dlfl\_ d2xa3a\_ d5bq7b1  
d1dqqb1 d3h42l1 d1egjh1 d1kcv11 d1fe8l1 d2j6e11 d1f3rb2 d1lk3l1  
d1sm3h1 d1q0xh1 d1ghfh1 d7fab11 d1igch1 d1lo0h1 d4idla\_ d5c2b1\_  
d1jrh11 d1il1a1 d3zhda1 d4kfzc\_ d1b0wa\_ d1e6oh1 d1mex11 d4krpb\_  
d1fnsh1 d1ncwh1 d4hgma\_ d4eigb1 d4rzca\_ d2mpa11 d4y5xa\_ d5en2b1  
d3lrga1 d4ej1c1 d1rhha1 d1j05b\_ d1forh1 d1q9wb1 d2wzpd\_ d2aq2a1  
d1h0da1 d3revb1 d2ij0c1 d1tzha1 d4m7j11 d1k6ql1 d3b9kc1 d1igml\_  
d3qeua1 d1dsfl\_ d1celh1 d1kcuh1 d1zvha1 d1zvoa1 d1tqbb1 d1ay1l1  
d2qsc11 d2cgrh1 d1nl0h1 d1ken11 d3eo0a1 d4n9ob1 d1n0xl1 d3k1kc\_  
d1prtcl d2wv6d\_ d1prtfl\_ d1ltrd\_ d4l63b1 d1r4pb\_ d1prtld\_ d1tl0f\_

d2bosa\_ d1prt1b1 d3chbd\_ d2aq2b1 d1ck1a1 d1enfa1 d1i4pa1 d1vloa1  
d1et9a1 d1esfa1 d2g9hd1 d4ohja1 d1klud1 d1eu3a1 d1ty0a1 d1fnua1  
d2cqva1 d1fhga\_ d2k1ma\_ d2d12a1 d1biha3 d1biha1 d1biha4 d3qp3a1  
d1glca\_ d1gxea\_ d1cvsc2 d1cvsc1 d1xmwa2 d1m4ka2 d2otpa2 d1biha2  
d1rhfa2 d2fcba2 d2fcba1 d1wwbx\_ d1gsma2 d1lepfa1 d1lepfa2 d2dava1  
d1waaa\_ d1f97a2 d1x44a1 d1vcaa2 d1fnla2 d1fnla1 d3b5ha2 d3h8na2  
d3h8na1 d1jbj1a1 d1jbj2a1 d1pd6a\_ d1f2qa2 d1f2qa1 d3cx2a\_ d1nbqa2  
d3b5ha1 d1n26a1 d1xiwb\_ d1xaua\_ d1fltx\_ d2ifga1 d1olla1 d1olla2  
d1cs6a4 d1cs6a3 d1cs6a2 d1cs6a1 d2gw5a2 d1sy6a1 d1xiwa\_ d1lucta2  
d1lucta1 d1ry7b2 d1gl4b\_ d1qz1a3 d1olza1 d2c9aa1 d1wwca\_

**Family-16 (a.4.1.1)**

**Positive dataset contains 30 protein sequences.**

d2msya\_ d2djoa1 d2r5za\_ d2lmda1 d1s7ea1 d3nara\_ d1zq3p1 d2craa1  
d4uuta\_ d3a01a\_ d1x58a1 d3rkqa1 d3cmya1 d2cqxa1 d2da6a1 d1x41a1  
d1wh7a1 d2mw8a\_ d1x2ma1 d1wi3a1 d1wjha1 d1x2na1 d2cuea1 d3k2aa\_  
d2hosa\_ d2jwta2 d2hi3a\_ d4j19a\_ d3lnqa\_ d1wh5a1

**Negative dataset contains 3931 protein sequences.**

d1m32a\_ d1libja\_ d1c7na\_ d1liuga\_ d4q75a\_ d2bkwa1 d1t3ia\_ d1n8pa\_  
d1qz9a\_ d1jff9a\_ d1leg5a\_ d1p3wa\_ d3kgwa\_ d1c11a\_ d2ctza1 d2rfva\_  
d1gc0a\_ d1cs1a\_ d1d2fa\_ d2ch1a1 d1qgna\_ d1pffa\_ d1elua\_ d1orva2  
d1xfda2 d1u08a\_ d1lc5a\_ d1b5pa\_ d1bw0a\_ d3pd6a\_ d7aata\_ d2csta\_  
d1j32a\_ d1fg7a\_ d4wlha\_ d1o4sa\_ d1v2da\_ d1gdea\_ d1m6sa\_ d1v72a1  
d1svva\_ d1ajsa\_ d1wsta1 d2f8ja2 d1lk9a\_ d1vp4a1 d1xi9a1 d2gb3a1  
d1yaaa\_ d2bnma2 d3rcha\_ d3k40a\_ d1pmma\_ d2cfba1 d1o69a\_ d1bj4a\_  
d3k28a\_ d2bwpa\_ d3lg0a\_ d2fnua\_ d3ou5a\_ d1z7da1 d1b9ha\_ d1iaya\_  
d4msoa\_ d1bs0a\_ d1s0aa\_ d1sffa\_ d3tqxa\_ d1mdoa\_ d3qboa\_ d3pgya\_  
d1bjna\_ d2dkja\_ d1ejia\_ d1vefa1 d4wxga\_ d3bs8a\_ d3gbxa1 d1w23a\_  
d1sefa\_ d1sfna\_ d1sq4a\_ d1ddla\_ d1e57b\_ d1f56a\_ d1bypa\_ d1azca\_  
d1ws8a\_ d3u25a\_ d1cuoa\_ d1id2a\_ d1rkra\_ d2iaac\_ d4dp1x\_ d1nwpa\_  
d2gima\_ d2i7sa\_ d1qhqa\_ d3ehbb1 d1fftb1 d1gyca3 d1hfua2 d1kbva1  
d1kbva2 d1sdda1 d1sdda2 d1gyca1 d1gyca2 d1mzya1 d2bw4a1 d1aoza1  
d1aoza3 d1aoza2 d1kyaa2 d1kyaa3 d1mzya2 d4e9sa1 d1sddb1 d1sddb2  
d1hfua1 d1hfua3 d1oe1a2 d1oe1a1 d1v10a2 d1v10a3 d1v10a1 d1a3qa1  
d1iknc\_ d3brda1 d1p7h11 d1imhc1 d1gjia1 d1zk9a1 d2cxka1 d2bema\_  
d1pama1 d1ea9c1 d1qhoa1 d2fhfa2 d2fhfa1 d1k3ia1 d1j0ha1 d1cxl1a1  
d2bhua1 d1edqa1 d1f1sa2 d1lut9a2 d1gvia1 d1txka1 d4alac\_ d1pjwa\_  
d1rera1 d1s6na\_ d3uzqb\_ d2ph1a2 d2ph1a1 d1fxza2 d1fxza1 d1lrha\_  
d1uija1 g1dgw.1 d2v09a\_ d1uika2 d1uika1 d1dgwa\_ d1lep0a\_ d2pa7a1  
d1wlta1 d1nxma\_ d2c0za1 d1ds6b\_ d1fstb\_ d1ex0a1 d1g0da1 d1tafa\_  
d1bh9b\_ d1tafb\_ d1q9ca\_ d1h3ob\_ d2byka1 d1n1ja\_ d4g92b\_ d1bh9a\_  
d1jffia\_ d1h3oa\_ d2bykb1 d1n1jb\_ d3gpdg2 d2q49a2 d1hdgo2 d2g17a2  
d2cvoa2 d2czca1 d3pwka2 d1obfo2 d1i32a2 d1zyao2 d2pkqo2 d1b7go2  
d2hjsa2 d1cf2o2 d1vkna2 d1nvmb2 d1ux8a\_ d1dlya\_ d4i0va\_ d2bkma\_  
d1dlwa\_ d2bmma\_ d3lv8a\_ d1s3ga1 d1zaka1 d1s4qa\_ d3tvta2 d1uf9a\_

d1khta\_ d1ckea\_ d1osna\_ d1p5zb\_ d4tmka\_ d3cm0a\_ d1tmka\_ d1jaga\_  
d3h86a\_ d1t0hb\_ d1nn5a\_ d2h92a\_ d3kb2a1 d2c95a1 d1yj5a2 d1kgda\_  
d1ly1a\_ d2ak3a1 d1vyva2 d1deka\_ d2grja1 d1p3ja1 d1y63a\_ d1e4ya1  
d1s96a\_ d3iija1 d1lvga\_ d1nksa\_ d1vyua2 d4e22a\_ d1qf9a\_ d1jjva\_  
d1q3ta\_ d1ki9a\_ d1lw7a2 d1teva\_ d1kja2 d1gsia\_ d2iyva2 d1viaa\_  
d1e6ca\_ d1x6va3 d1odfa\_ d4gi7a\_ d2jeoa1 d1rz3a\_ d1z0ja1 d3umra2  
d3gj0a1 d2gaoa1 d1yzga1 d1x3sa1 d1g7sa4 d1puja\_ d1udxa2 d1kk1a3  
d2o52a\_ d1jwyb\_ d1zcaa2 d1zcba2 d2fv8a1 d2cjwa\_ d3dz8a1 d1xzpa2  
d1vg8a\_ d4qxaa\_ d2ew1a1 d1x1ra1 d2bcgy\_ d3doea1 d3cona\_ d3rega\_  
d3wyga\_ d1upta\_ d2b6ha1 d1zd9a1 d1lnza2 d1r5ba3 d1n0ua2 d1r2qa\_  
d2f91a1 d2rhda\_ d3q3jb\_ d3q85a\_ d1efma1 d1r8qa\_ d2gf9a1 d2akab1  
d1ek0a\_ d1z08a1 d2gcoa1 d2dy1a2 d4g01b\_ d2cxa1 d1svia\_ d3q72a\_  
d1ni3a1 d4ac9a4 d2erxa1 d2bmea\_ d1wxqa1 d2gf0a1 d4ldja1 d1zunb3  
d1d5ca\_ d4lv5b\_ d1efca3 d1kmqa\_ d2g6ba1 d3lrpa\_ d1tada2 d2y8ea\_  
d4rd4a1 d1z06a1 d2heia\_ d3a58b\_ d1u01a2 d1d2ea3 d1zj6a1 d2ocba\_  
d3rwoa\_ d1mr3f\_ d2e9sa1 d4u5xa1 d2iwra\_ d2fn4a1 d3bwdd\_ d2nzja1  
d2atva1 d2ksqa\_ d3l43a\_ d1mkya2 d1mkya1 d1wmsa\_ d1jnya3 d2rmka\_  
d1f6ba\_ d1f60a3 d1gota2 d1jala1 d2fh5b1 d1g16a\_ d2wblc\_ d1m7ba\_  
d1wf3a1 d1f5na2 d1t9ha2 d1z6xa1 d1z0aa1 d2fg5a1 d2a5ja1 d2bcjq2  
d1s0ua3 d1ky3a\_ d4y0va\_ d4lhwa\_ d2qmea1 d2atxa1 d1egaa1 d1ryha\_  
d1moza\_ d1nrjb\_ d2erya1 d3bfka\_ d1puia\_ d3j3az1 d3t5ga\_ d1shza2  
d3defa\_ d2f7sa1 d3raba\_ d3tsoa\_ d3aq4a\_ d2a17a1 d3sfva1 d3bc1a\_  
d2ncda\_ d1sdma\_ d3h4sa1 d2heha\_ d2grya\_ g3kin.1 d1kk8a2 d1br2a2  
d1f9va\_ d2mysa2 d1lkxa\_ d3t0qa\_ d4db1a1 d3gbja\_ d1ry6a\_ d1v8ka\_  
d1y4wa1 d3vrda1 d3vrda2 d1fcdc1 d1h1oa2 d1h1oa1 d1m70a2 d1m70a1  
d1ig8a1 d1czan2 d1czan3 d1czan1 d1ig8a2 d1czan4 d1bg3a4 d1bg3a3  
d1bg3a1 d1nira1 d1qksa1 d1zc6a1 d1zbsa1 d1zbsa2 d1zc6a2 d2ch5a2  
d2ch5a1 d1zxo2 d1zxo1 d1hroa\_ d4gedb\_ d3zooa\_ d1mz4a\_ d1gu2a\_  
d1f1fa\_ d1dvva\_ d1c6ra\_ d1c75a\_ d1e29a\_ d1gdva\_ d1cnoa\_ d1h32b\_  
d1co6a\_ d2bh4x\_ d2aiua\_ d5cytr\_ d1jdl\_ d1i8oa\_ d2zboa\_ d3dmia\_  
d1ls9a\_ d1wvec\_ d2yk3a\_ d3ph2b\_ d1dw0a\_ d5aura\_ d1ql3a\_ d1qn2a\_  
d1f1ca\_ d4zzva\_ d2xspa\_ d4v20a\_ d1ojja\_ d4ipma1 d1gpia\_ d4csia\_  
d3pfza\_ d3ovwa\_ d2yoka\_ d2nqya\_ d1h4ga\_ d1hixa\_ d1oa2a\_ d1olra\_  
d3b7ma\_ d4h7ma1 d3wp3a\_ d2vgda\_ d1ligoa\_ d3zsea\_ d2nlra\_ d3wx5a\_  
d1oa3a\_ d1pvxa\_ d1m4wa\_ d1f5ja\_ d1oa4a\_ d4ixla1 d2a6za1 d3a4ua\_  
d2a6va1 d1evsa\_ d1pvhb\_ d1z7ca\_ d1huwa\_ d1bgea\_ d1rhga\_ d1f6fa\_  
d1f45b\_ d1ilrb\_ d1axia\_ d1etea\_ d3tgxb\_ d1scfa\_ d2z3qa1 d3qb1a\_  
d1hula\_ d1m48a\_ d4nkqb\_ d1eera\_ d1v7mv\_ d5e4ea\_ d2o27a\_ d3b5ka\_  
d2psma1 d4zf7a\_ d3uf5a\_ d4x51a\_ d1d9ca\_ d4ypgc1 d3oq3a\_ d1lqsl\_  
d1n1fa\_ d1aula\_ d1wu3i\_ d3bes1\_ d3ux9a\_ d1v8fa\_ d2ejca\_ d3muea1  
d1lihoa\_ d3q12a1 d3rbaa\_ d2qtra\_ d1nupa\_ d3l92a\_ d1f9aa\_ d1qjca\_  
d2h29a\_ d1vlha\_ d1lw7a1 d1mrza2 d4ruka\_ d2el7a\_ d1iq0a2 d1irxa2  
d1ivsa4 d2cyba\_ d1rqga2 d1j09a2 d2yxna\_ d1f7ua2 d1h3fa1 d1ffya3  
d2g36a1 d1nzja\_ d1jila\_ d1n3la\_ d1i6la\_ d1pfva2 d1h3na3 d3n9ia\_

d3sz3a1 d3sw2a\_ d1dx5i3 d1edmb\_ d1autl2 d1autl1 d1nqlb\_ d1dval1  
d1szba2 d1kigl\_ d2y5fl\_ d1ijqa2 d1gk5a\_ d1glsa2 d1nt0a3 d1xdtr\_  
d1lmja2 d1lmja1 d1nzia2 d2wphe\_ d1kli1\_ d1pfxl2 d1pfxl1 d1p9ja\_  
d1g1ta2 d1f7ea\_ d4yzub\_ d2mgpa1 d1b9wa1 d1b9wa2 d2mgpa2 d1ob1c1  
d1ob1c2 d1n1ia2 d1n1ia1 d2npra2 d2npra1 d1m1xb4 d1qx2a\_ d1ig5a\_  
d2y5ia\_ d1qlsa\_ d1psra\_ d3n22a\_ d2egda\_ d4ggfc\_ d2wcea\_ d2luca\_  
d4aqia\_ d3nsia\_ d2lp3a\_ d1j55a\_ d1a4pa\_ d1nsha\_ d1pvaa\_ d3fs7a\_  
d1ttxa\_ d1rwya\_ d2kyfa\_ d1rk9a\_ d1a75a\_ d1exra\_ d1tiza1 d1nyaa\_  
d1g8ia\_ d1ggwa\_ d1wdcc\_ d3fwba\_ d1ggza\_ d2o5ga\_ d1ctaa\_ d1m45a\_  
d3i5gc\_ d1sl8a\_ d1fpwa\_ d2scpa\_ d2roaa\_ d4aqra\_ d3pn7b\_ d1br1b\_  
d2mysb\_ d1s6ca\_ d1bjfa\_ d2obha\_ d1jfkka\_ d1jf0a\_ d1qv0a\_ d1lkja\_  
d2mlfc\_ d2m97a\_ d2d8na\_ d4by5a\_ d1jbaa\_ d4nqga\_ d1wdcb\_ d2mysc\_  
d1j7qa\_ d1s6ia\_ d1uhka2 d1r2ua\_ d1dtla\_ d3kf9a\_ d3pn7c\_ d1qjta\_  
d1fi6a\_ d1c07a\_ d5d67d\_ d1tuza\_ d1leg3a1 d1leg3a2 d2zkmx1 d1sn1a\_  
d1gjya\_ d1y1xa\_ d1hqva\_ d1dvia\_ d1df0a1 d1qxp2a\_ d4usla\_ d1k94a\_  
d1sfsa\_ d1jfxa\_ d1wkya2 d1uuqa\_ d3wh9a\_ d4m1ra\_ d1xyza\_ d4xuya\_  
d2je8a5 d4bf7a1 d3cuia\_ d1ur4a\_ d1qw9a2 d1odza\_ d2vzsa5 d1bqca\_  
d2x2ya1 d1hjqa\_ d1qnra\_ d4y7ea1 d1vjza\_ d4k68a\_ d2v3ga\_ d4hpga\_  
d1nofa2 d1nq6a\_ d1h4pa\_ d1aq0a\_ d3ziza\_ d4bs0a\_ d1ecea\_ d1h1na\_  
d1ta3b\_ d1w91a2 d1uhva2 d1us3a2 d1legza\_ d7a3ha\_ d1tvna1 d3nyda1  
d1ghsa\_ d2cyga1 d4xv0a\_ d2c8na2 d1w32a\_ d3emca\_ d1v6ya1 d1foba\_  
d2uwfa1 d2fgla\_ d3niya1 d2c0ha1 d1rh9a1 d1yq2a5 d1szna2 d1fa2a\_  
d1pama4 d5do8a1 d1ea9c3 d1hx0a2 d2fhfa5 d1qhoa4 d1avaa2 d1m53a2  
d4m8ua1 d2gjpa2 d1lwha2 d4howa1 d1ktba2 d1j0ha3 d3vm5a1 d2x1ia\_  
d1wzaa2 d1uasa2 d2diea1 d1mxga2 d1ht6a2 d1eswa\_ d1iv8a2 d5cpsa\_  
d1ud2a2 d1zjaa1 d3gbea1 d1kwga2 d1wdpa\_ d1gcya2 d1g5aa2 d1hvxa2  
d3dhpa2 d2bhua3 d4do4a1 d3qgva1 d1e43a2 d1g94a2 d2d3na2 d1gjwa2  
d1gvia3 d1x1na1 d1r7aa2 d1tz7a1 d2x42a1 d1tr9a1 d3abza1 d4toqa\_  
d1wb0a1 d1w9pa1 d1itxa1 d1kfwa1 d1goia2 d1edqa2 d2gsja\_ d1hjxa1  
d1jnda1 d1vf8a1 d3wdpp1 d3wq5a\_ d1gnxa\_ d4gxpa\_ d4hz8a\_ d1e4mm\_  
d3aiua\_ d1wcga1 d1qvba\_ d3ahxa\_ d1v02a\_ d2dgaa\_ d1pbga\_ d1vffa1  
d1qoxa\_ d4ha4a\_ d1mixa2 d1e5wa2 d1j19a2 d2a16b2 d3syxa1 d1mkea1  
d2p8va\_ d1xoda1 d1i7aa\_ d1evha\_ d1qc6a\_ d1b9ra\_ d1offa\_ d1frra\_  
d3wcqa\_ d1e9ma\_ d1wria\_ d1i7ha\_ d3av8a\_ d1czpa\_ d1rfka\_ d3plma1  
d3b2ga\_ d2bt6a2 d1wgqa1 d1v89a1 d2coda1 d1zc3b\_ d1wg7a1 d1u5ea1  
d1v61a1 d2coca1 d2ys1a1 d1v5pa1 d1ntya2 d1wjma1 d1wila1 d1u29a\_  
d1xx0a1 d1unqa\_ d2zkmx3 d1fhoa\_ d1v88a1 d2adza1 d1x1fa1 d1p6sa\_  
d2coaa1 d1btka\_ d1v5ma1 d2x18a\_ d1dyna\_ d1x1ga1 d4kaxb\_ d2j59m1  
d1kilb2 d1xcga2 d1txda2 d1u5da1 d1dbha2 d1wlha\_ d1upqa\_ d1v5ua1  
d1foea2 d2fjla1 d1eaza\_ d2dfka2 d2cofa1 d1kz7a2 d1d4ua2 d9ldta1  
d2ewda3 d1up7a1 d2dfda1 d1s6ya1 d1vjta1 d7mdha1 d1hyea1 d1t2da1  
d1ojsa3 d1b8pa1 d1ldna1 d1hyha1 d1civa1 d2a92a1 d1ez4a1 d1i0za1  
d1y6ja1 d1gv0a1 d1ur5a1 d1ll1da1 d1lobba1 d1v8ba1 d1gdha1 d2dlda1  
d1mx3a1 d1ygya1 d1qp8a1 d1li4a1 d1j4aa1 d2naca1 d1npya1 d3t4ea2



d1a4ia1 d1o0sa1 d2hk9a2 d2egga2 d1b26a1 d1bvua1 d1gq2a1 d1c1da1  
d1leha1 d1gtma1 d1euza1 d1nvtal d3dona2 d1ledza1 d1gpja2 d1vi2a1  
d1p77a1 d1b0aa1 d1v16a1 d1v91a1 d1txga2 d3f47a1 d1mv8a2 d2pv7a2  
d1xc2a3 d2ahra2 d4xiya1 d2f1ka2 d1pgja2 d1i36a2 d1np3a2 d1lj8a4  
d1teaa3 d1qmg2 d2i76a2 d2g5ca2 d1wdka3 d1dlja2 d3cuma3 d1kola2  
d1f8fa2 d1qora2 d1jqba2 d1vj0a2 d1cdoa2 d1gu7a2 d1d1ta2 d1xa0a2  
d2dm6a2 d1jvba2 d1rjwa2 d1llua2 d1h2ba2 d1tt7a2 d1piwa2 d1o89a2  
d1iz0a2 d1e3ja2 d1yb5a2 d1uufa2 d1vj1a2 d1e3ia2 d3gpdg1 d1vc2a1  
d2nvwa1 d1u8fo1 d1ydwa1 d1hdgo1 d2g17a1 d1cf2o1 d2czca2 d1r0ka2  
d1obfo1 d2cvoa1 d1ebfa1 d1h6da1 d1i32a1 d1zh8a1 d2q49a1 d1qkia1  
d1j5pa4 d3pzra1 d1xeea1 d1vkoa1 d1vm6a3 d3qvsa1 d2pkqo1 d1b7go1  
d1gr0a1 d1p1ja1 d1lc0a1 d1j0xo1 d3pwka1 d2hjsa1 d1zyao1 d1vkna1  
d1tltal d1nvmb1 d3sjua\_ d3ojfa1 d1xu9a1 d2jjya1 d1n7ha\_ d1ylpa1  
d1h5qa\_ d1jtv\_ d4fs3a\_ d2bkaa1 d1gy8a\_ d2c5aa1 d1ulsa\_ d1ooea\_  
d2b69a1 d1y5ma1 d1spxa\_ d1ae1a\_ d1bxka\_ d1ydea1 d1gega\_ d1hdoa\_  
d1o5ia\_ d1e6ua\_ d1snya1 d2rhca\_ d3zv4a\_ d5ceja\_ d2d1ya1 d1fjha\_  
d3w8ea\_ d2fmua1 d1x1ta\_ d1rpna\_ d3ay7a1 d1k2wa\_ d1eq2a\_ d2hrba1  
d3ruaa\_ d2ew8a1 d4hwka\_ d1xgka\_ d2bd0a1 d1yo6a1 d2a35a1 d2ntva\_  
d1vl8a\_ d1hdca\_ d4bkua\_ d2ag5a1 d2q45a\_ d1nffa\_ d4iy1a\_ d1zbqa1  
d1kewa\_ d1ek6a\_ d1ja9a\_ d2q46a2 d1iy8a\_ d1cyda\_ d2ptga\_ d1hxha\_  
d1uzma1 d3lyla\_ d4m89a\_ d3wyea\_ d2b11a1 d1w6ua\_ d1sb8a\_ d2q2va\_  
d4nr0a\_ d1e6wa\_ d2gasa\_ d3oiga1 d2bgka1 d1mxha\_ d1vl0a1 d1rkxa\_  
d1r6da\_ d1wmaa1 d1e7wa\_ d2c07a1 d1xkqa\_ d3tzha\_ d1g0oa\_ d3lz6a\_  
d1qyca\_ d1ledoa\_ d1gz6a\_ d1loc2a\_ d1t2aa\_ d1zema1 d2xoxa\_ d1z45a2  
d1geea\_ d1p33a\_ d3lt0a\_ d4e6pa\_ d2wyua\_ d1db3a\_ d4q9na\_ d1xhla\_  
d4o1ma\_ d1fmca\_ d2uvda\_ d2gdza1 d1uaya\_ d2z1ma\_ d2o23a2 d2fr1a2  
d2fr1a1 d1qsga\_ d4zjua\_ d2a4ka1 d1yb1a\_ d1wvga1 d1yxma1 d3f4ba\_  
d1mg5a\_ d1xg5a1 d4ekfa\_ d2ckga\_ d1th0a\_ d2bkra\_ d4c5pa\_ d2bsza1  
d4bgfa\_ d1w4ta1 d1qxp4 d1ziva1 d1zcma1 d1t3ca\_ d1epwa3 d2a97a\_  
d3f1ea\_ d3ioqa\_ d1fh0a\_ d1o0ea\_ d1khqa\_ d1m6da\_ d2cb5a\_ g8pch.1  
d1s4va\_ d2pnsa\_ d1vsna1 d1mira\_ d1iwda\_ d2oula\_ d7pcka\_ d3bwka\_  
d3bcna\_ d2p86a\_ d1pvja\_ d1pcia\_ d1gece\_ d1deua\_ d4bs6a\_ d1xkga1  
d1cqda\_ d1jqpa2 d2c0ya\_ d2bdza\_ d3p5ua\_ d2o36a\_ d1k9xa\_ d1ex4a2  
d1c6va\_ d2jk6a2 d2jk6a1 d1feca1 d1feca2 d1lpfa1 d1lpfa2 d1xhca1  
d1xhca2 d1dx1a2 d1dx1a1 d1gera2 d1m6ia2 d1onfa1 d1onfa2 d3l1ada2  
d3l1ada1 d1w4xa1 d1w4xa2 d1gesa2 d1mo9a1 d1xdia1 d1f12a2 d1f12a1  
d1fcda1 d1fcda2 d1h6va1 d1mo9a2 d1gv4a2 d1gv4a1 d2gv8a2 d2gv8a1  
d1aoga1 d1aoga2 d1hyua1 d1ebda1 d1ebda2 d3dk9a1 d1q1ra2 d1q1ra1  
d1gesa1 d1zbf1a1 d2z1ha\_ d2etja1 d3qioa1 d1j11a\_ d2e41a\_ d1j12a\_  
d2lsna1 d1io2a\_ d1uaxa\_ d2yv0x\_ d1mu2a1 d1ekea\_ d1i39a\_ d1pn0a1  
d1reo1 d1ju2a1 d2f5va1 d3c96a1 d2gmha1 d1gpea1 d1o5wa1 d1n4wa1  
d1k0ia1 d2dw4a2 d2ivda1 d1seza1 d2voua1 d1kdga1 d1s5ja1 d2hbja2  
d2igia\_ d1wlja\_ d1qhta1 d4dlea1 d1tgoa1 d2f96a1 d3tr8a1 d3mxma\_  
d1q8ia1 d1y97a1 d1w0ha\_ d1kfsa1 d2py5a1 d1noya\_ d1d5aa1 d1yt3a3

d2guia\_ d3mwpal d4kb1a\_ dliv0a\_ d3ljqa\_ g1k2x.1 dlix2a\_ d3nvva1  
d1krha3 d2h88b1 d1t3qa2 d1kf6b2 dlzoyb1 dljq4a\_ dlffva2 dldgja2  
d1rm6c2 d1k8ka2 d1k8ka1 d3uleb1 d3i33a2 d3i33a1 d1bupa1 d1dkgd2  
d1dkgd1 d4ci6a2 d1jcfal d4a2ba2 d2fxua1 dlyaga2 dlyaga1 d4cbua2  
d1bupa2 d1r7ha\_ d1faaa\_ d1wika1 d1xfla\_ d1ttza1 d2f51a1 d1ti3a\_  
d1nhoa\_ d1sena\_ d2i4aa\_ d1ep7a\_ d1zmaa1 d1fo5a\_ d3lefa1 d3diea1  
d2yana1 d1z6na1 d1oaza\_ d3zywa1 d4aj8a\_ d1nm3a1 d4fiwa\_ d1wmja\_  
d4hs1a1 d1liloa\_ d1xwaa1 d1wjka1 d2vm1a\_ d1fb6a\_ d1gh2a\_ d1h75a\_  
d1nw2a\_ d1kx5b\_ d3a6na\_ d4m6ba2 d2nqbd\_ d3wkjd\_ d2yfwe\_ d4h9na\_  
d5bnxa\_ d1kx5c\_ d3r45a\_ d1eqzb\_ d4jjnb\_ d1f66c\_ d1eqza\_ d4wnnb\_  
d1kx5a\_ d1u35c1 d1id3a\_ d2nqbc\_ d1kx5d\_ d3us3a3 d3us3a1 d2b5ea2  
d2b5ea3 d2b5ea1 d2b5ea4 d2kp1a1 d2kp2a1 d1hyua3 d1hyua4 d1j08a1  
d1j08a2 d1pd212 d1nhya2 d2a2ra2 d1k0dd2 d1f2ea2 d1gsua2 d1f3ba2  
d2fhea2 d2pvqa1 d1tw9a2 d1oyja2 d1e6ba2 d3ik7a1 d4is0a1 d1r5aa2  
d1jlva2 d1m0ua2 d3gtub2 d1z9ha2 d1okta2 d1axda2 d2gsra2 d1tu7a2  
d1k3ya2 d1zagma1 d1b48a2 d1gnwa2 d1gwca2 d2gsta2 d1glqa2 d1oe8a2  
d1pn9a2 d1v2aa2 d1fw1a2 d1duga2 d1g7ea\_ d1qqya\_ d1gd6a\_ d1f6ra\_  
d1livma\_ d2gv0a\_ d1iiza\_ d2z2fa\_ d1j8xa\_ d1ghla\_ d1b9oa\_ d1741a\_  
d1691a\_ d2o4wa\_ d1p37a\_ d1k28a3 d1xjta1 d1jtma\_ d2f2qa\_ d4e97a1  
d1g4ma1 d1g4ma2 d2za0a\_ d2c21a1 d2pjsa1 d2i7ra1 d1ecea\_ d1xqaa1  
d5cj3a1 d1npba\_ d1jifa\_ d2p7oa\_ d1r9ca\_ d1nkia\_ d2h0va\_ d1iyka2  
d1rxta1 d1iica2 d1iica1 d1qsta\_ d2beia1 d4m3sa\_ d1u6ma1 d1ygha\_  
d1yk3a1 d3dr6a\_ d1xmta\_ d1z4ea1 d2ge3a1 d1bo4a\_ d2fiaa1 d2jdca1  
d1y9wa1 d3to7a\_ d1wwza1 d2f14a1 d2ozua1 d2b5ga\_ d2cy2a1 d2p0wa\_  
d1cm0a\_ d4pswa\_ d1yrea1 d1yr0a1 d1m4ia\_ d2gana1 d1yvka1 d1ghea\_  
d2g3aa1 d1y7ra1 d2euia1 d1q2ya\_ d2fsra1 d1xeba\_ d2ae6a1 d1cjwa\_  
d1qsma\_ d2aj6a1 d1y9ka1 d1i12a\_ d1vkca\_ d2atra1 d1n71a\_ d2d4pa1  
d2fiwa1 d2fe7a1 d1tiqa1 d2ou2a\_ d1yx0a1 d2fcka1 d1p0ha\_ d2j8ma\_  
d2pq8a\_ d1z4ra1 d1s3za1 d1ufha\_ d1c4qa\_ d1prtcl d2wv6d\_ d1prtfl\_  
d1l1trd\_ d4l63b1 d1r4pb\_ d1prtd\_ d1t10f\_ d2bosa\_ d1prtb1 d3chbd\_  
d1xvqa1 d1pn0a2 d3hy2a\_ d2cvba1 d1o8xa\_ d1lu4a\_ d1we0a1 d2bmxal  
d2a4va1 d1psqa\_ d1xiya1 d1q98a\_ d1n8ja\_ d1zofa1 d2ggta\_ d3tjja\_  
d4je1a1 d1o73a\_ d3s9fa\_ d2zcta\_ d1qmva\_ d1jfua\_ d2b1ka\_ d5dvba1  
d2b5xa1 d2v2ga\_ d1st9a\_ d3tb2a\_ d4llra\_ d4fh8a1 d1knga\_ d2h30a\_  
d1i5ga\_ d2z9sa\_ d2f8aa1 d1tp9a1 d2b7ka\_ d1nm3a2 d3hvva\_ d2wfca1  
d4kcea\_ d1xvwa1 d4gqca1 d3qpma\_ d4k1fa\_ d1zsoa1 d1gp1a\_ d1prxa\_  
d1zsqal d2qked\_ d4ksoa\_ d1t4za1 d1wwja\_ d3kasa1 d3bila3 d1e88a1  
d1l6ja5 d1l6ja4 d1leaka4 d1leaka3 d1l6ja3 d1h8pa2 d1h8pa1 d1letha2  
d1w52x1 d2ppla1 d1hpla2 d1lpbb2 d2oxea1 d1bu8a2 d1rp1a2 d1lgya\_  
d4l3wa\_ d1gz7a\_ d1lukca\_ d1cr6a2 d1bvsa3 d3groa\_ d1pjaa\_ d1ei9a\_  
d1svpa\_ d1mbma\_ d3su6a1 d1cu1a1 d4agka\_ d1q31a\_ g1n11.1 d3e90b\_  
d1ep5a\_ d3u1jb\_ d3zxha\_ d1cgla\_ d1rm8a\_ d1leaka2 d1hy7a\_ d2jsda\_  
d1cxva\_ d1hv5a\_ d1i76a\_ d3p0ya1 d1lgra1 d1lgra2 d1n8yc2 d1n8yc1  
d1m6ba2 d1m6ba1 d4dv8a2 d2tbvc\_ d1c8nc\_ d1x36a\_ d1smvc\_ d1ng0c\_

d4sbvc\_ d1lopoa\_ d1f2nc\_ d1cixa\_ d1y29a\_ d1v7fa\_ d2jtba\_ d1d1ha\_  
d1g9pa\_ d1llupa\_ d1qk7a\_ d1mb6a\_ d2a2va\_ d1niya\_ d1i25a\_ d1hvwa\_  
d2mpqa\_ d1ie6a\_ d1kqha\_ d1la4a\_ d2mxa01 d1d10a\_ d1koza\_ d1qk6a\_  
d1emxa\_ d1llqra\_ d1c6wa\_ d1rmka\_ d1ixta\_ d1eyoa\_ d1cnaa\_ d1glpa\_  
d1f3ka\_ d1fyga\_ d1rypd\_ d1irua\_ d1rypc\_ d3unfk\_ d1rypa\_ d1j2pa\_  
d1irui\_ d1j2qh\_ d3unfh\_ d1m4ya\_ d1rypb\_ d1irul\_ d1irug\_ d1iru2\_  
d1q5rh\_ d1rypg\_ d1g3ka\_ d1q5qa\_ d1e94a\_ d1irub\_ d1ryph\_ d3ty6a\_  
d1iruj\_ d1iruk\_ d1rype\_ d1irud\_ d1irue\_ d3mi01\_ d1rypf\_ d1iruh\_  
d2z3ba\_ d1iruc\_ d3mka2\_ d1irul\_ d1ny721 d1ny722 d1a6ca2 d1a6ca1  
d1pgl22 d1pgl21 d1pgl11 d1ny711 d1mqta\_ d1d4m3\_ d1fmd3\_ d2mev1\_  
glaym.1 d1evl3\_ d4q4w1\_ d1r1a3\_ d2x5ia\_ d1rhi1\_ glr1a.1 gl4d4m.1  
glrhi.1 d1b35b\_ d1loopa\_ d1tme1\_ d4iv1a\_ glpvc.1 glfpn.1 d1fpn1\_  
d4gb31\_ d1d4m1\_ d1fmd1\_ d2wzr3\_ glcov.1 d1qqp3\_ glfmd.1 d2x5ic\_  
d1rhi3\_ g1oop.1 d1hxs1\_ g1hxs.1 d1fpn3\_ d1bev1\_ g2mev.1 d1eah3\_  
d1aym1\_ d1pvc3\_ d1qqp1\_ d1zba3\_ d1h8ta\_ d3vbhc\_ glb35.1 glbev.1  
d1hxs3\_ g1ev1.1 d1bev3\_ g1tmf.1 d1tmf1\_ d1b35a\_ d2mev3\_ gleah.1  
glh8t.1 d1eah1\_ d4q4w3\_ d1r1a1\_ d1aym3\_ d1pvc1\_ d1zba1\_ d1h8tc\_  
d1loopc\_ d1tme3\_ glqqp.1 d4iv1c\_ gltme.1 d3ubub\_ d1legia\_ d1qo3c\_  
d1v7pa\_ d1tdqb\_ d3ubua\_ d1c3ab\_ d1h8ua\_ d3bx4b\_ d1t8ca1 d1sb2a1  
d1qdda\_ d2ziba1\_ d3cada\_ d1byfa\_ d1j34b\_ d1jwia\_ d1jzna\_ d1c3aa\_  
d1oz7b\_ d1wmza\_ d3bdwb\_ d1hq8a\_ d1fifa1 d1dv8a\_ d3hupa\_ d1wk1a1  
d2afpa\_ d3bx4a\_ d1gz2a\_ d1sl6a\_ d1v7pb\_ d3g8ka\_ d1ixxa\_ d1j34a\_  
d1jwib\_ d1gl1sa1 d1y17a1 d1ja3a\_ d1fvub\_ d3bdwa\_ d1sb2b1 d1fvua\_  
d1umrc\_ d1oz7a\_ d4m17a\_ d3cfwa1 d1ypqa1 d1gl1ta1 d3fd4a\_ d3l9jc\_  
d4dn8a1 d1v41b\_ d1rd11\_ d2msba\_ d4w9ta\_ d1jvna1 d4x2ra1 d1ka9f\_  
d1qo2a\_ d4axka1 d1thfd\_ d4u28a\_ d2y88a\_ d4wd0a\_ d1vzwa1 d3ia2a\_  
d1a88a\_ d4dgqa1 d1zoia\_ d2flia1 d1rpxa\_ d1tqja\_ d1tqxa\_ d4lt9a1  
d3tc7a1 d3hoja\_ d1i4na\_ d3vnda\_ d3n18a1 d1geqa\_ d3naval d4a2ra1  
d3tc6a1 d1ujpa\_ d4ijba\_ d1xcfa\_ d1vc4a\_ d1rd5a\_ d1qopa\_ d3b5va\_  
d2r80b\_ d1cqxa1 d1cg5a\_ d1gcvb\_ d3boma\_ d2h8fb\_ d2raoa\_ d3bj1a\_  
d4hrrb\_ d2r50a\_ d3d1kb\_ d2aa1b1 d3zhwa\_ d3hf4b\_ d3gdja\_ d1jebb\_  
d3bj1b\_ d1x9fb\_ d1wmub\_ d1gcva\_ d3bcqb\_ d3d4xb\_ d1gvha1 d2dc3a\_  
d3hf4a\_ d4yu3a\_ d3k8ba\_ d1qpwb\_ d2r80a\_ d3bcqa\_ d1v4wa\_ d3wtgb\_  
d1j17a\_ d4esaa\_ d1a9we\_ d3d1ab\_ d1fsla\_ d4h21a\_ d1v4wb\_ d1mwca\_  
d1vhba\_ d1jeba\_ d1spgb\_ d1h97a\_ d1q1fa\_ d1tu9a1 d3d1aa\_ d1hdsb\_  
d3hyub\_ d2zfb\_ d3fs4a\_ d1oj6a\_ d1shrb\_ d4h21b\_ d4yu3b\_ d1spga\_  
d3hrwa\_ d3qqra\_ d3at5a\_ d4wchd\_ d3hyua\_ d1cg5b\_ d1uc3a\_ d1hbra\_  
d2raob\_ d1outb\_ d4esab\_ d3gdjb\_ d3qqqa\_ d1x9fc\_ d3vrfa\_ d1litha\_  
d3mkba\_ d3d4xa\_ d3mjpa\_ d1j16a\_ d3fh9a\_ d1outa\_ d2dc3b\_ d1lit2a\_  
d3eoka\_ d3g46a\_ d1qpwa\_ d3vrfb\_ d1x9fd\_ d1hdsa\_ d2zfb\_ d3mkbb\_  
d1or4a\_ d3wtga\_ d1a4fa\_ d3fh9b\_ d3bomb\_ d3cy5a\_ d3at5b\_ d1x9fa\_  
d2oifa\_ d4lmb\_ d1cpcb\_ d3v57a\_ d1kn1a\_ d1cpca\_ d4f0ta\_ d2vjha\_  
d4po5b\_ d1eyxa\_ d1alla\_ d4f0tb\_ d1b33b\_ d1b8db\_ d4h0mb\_ d2vjhb\_  
d4lmb\_ d2vmlb\_ d1allb\_ d2vjta\_ d3dbja\_ d2vmla\_ d2vjtb\_ d4f0ub\_

d1f99b\_ d4rmpa1 d1liaa\_ d1eyxb\_ d2uulb\_ d4lmsb\_ d4f0ua\_ d2bv8a\_  
d1f99a\_ d2bv8b\_ d2c7lb\_ d3dbjb\_ d4rmpb1 d1b8da\_ d4h0ma\_ d3v57b\_  
d1kn1b\_ d1liab\_ d2uula\_ d2j96a\_ d1iwea\_ d1qf5a\_ d1vmaa2 d1nija1  
d1np6a\_ d2p67a1 d3ihla\_ d1okkd2 d1ls1a2 d1s1ma2 d1iona\_ d2v40a\_  
d1dj3a\_ d3hida\_ d2vo1a1 d2g0ta1 d1vcoa2 d1j8mf2 d1g3qa\_ d1xjca\_  
d1p9ba\_ d1qzxa3 d1ihua2 d1ihua1 d2qm8a\_ d1dj2a\_ d4ioja\_ d1cp2a\_  
d1yrba2 d1azwa\_ d1mtza\_ d1hlga\_ d2xqfa\_ d1ea5a\_ d1f6wa\_ d1dx4a\_  
d1qe3a\_ d1k4ya\_ d4qwwa\_ d2ha2a\_ d3c8da2 d2pbla1 d1jkma\_ d1lzla\_  
d1jjfa\_ d2h0ba\_ d2erfa\_ d1h30a2 d3mw4a1 d1pz7a\_ d2r1ba\_ d3v64a1  
d1d2sa\_ d3bopa1 d3mw3a1 d1okqa1 d1okqa2 d2m5ta\_ d1cqqa\_ d1wqsa\_  
d5bpea\_ d2ipha\_ d1lvoa\_ d2bhga1 d3tnta\_ d3sjia\_ d3d23a1 d2fyqa\_  
d3tloa\_ d3zvea1 d3q3ya1 d4asha1 d4iuaa3 d4bvva\_ d5hpga\_ d3k65a\_  
d1ki0a3 d1ki0a2 d1ki0a1 d1a0ha1 d1pmla\_ d3sp8a3 d2feba1 d1xova2  
d1f74a\_ d3l21a\_ d2e1da\_ d1to3a1 d1w3ia\_ d1sfla\_ d1vcva1 d4imea\_  
d1wa3a\_ d2ocza1 d1f2ja\_ d3m16a\_ d2yxga\_ d1ub3a\_ d3a5fa\_ d1fbaa\_  
d1l6wa\_ d1xfba1 d1wx0a1 d1vpxa1 d1ojxa\_ d1mxsa\_ d2a4aa1 d1xkya1  
d3cq0a1 d3s1xa\_ d1f05a\_ d1fdja\_ d3cpra1 d4d2ja\_ d1cg2a1 d1yloa2  
d1y7ea2 d1y0ya3 d1l1fwa1 d1vixa1 d1fnoa4 d1vhua2 d1ysja1 d1vhea2  
d1z2la1 d2fvga2 d1vgya1 d1r3na1 d2grea2 d1xmba1 g1q7l.1 d1rtqa\_  
d3rp2a\_ g1lucy.1 d1fuja\_ d2zchp\_ d3w94a\_ d1si5h\_ d1lo6a\_ g2pka.1  
d1cgha\_ d1kigh\_ d1a5ia\_ d3s9ba\_ d1hj8a\_ d1ao5a\_ d2anya\_ d1q3xa1  
d1gvza\_ d4gsoa\_ d2f91a1 d1iaua\_ d1gdna\_ d1eufa\_ g1fiw.1 d1eq9a\_  
d4nfea\_ d2rdla\_ d1spja\_ d1elva1 d1a7sa\_ d1ekbb\_ d1pfxc\_ d1yc0a\_  
d2aiqa\_ g1fiz.1 d1fi8a\_ d4k60a\_ d4dgja\_ d1mzaa\_ d1lop0a\_ d3tjva\_  
d1pytd\_ d1sgfg\_ g1gg6.1 d2eeka\_ g1rtf.1 d1a0ja\_ d3g01a\_ d1pytc\_  
d4e7na\_ d1ddja\_ d1z8ga1 d2hlca\_ d1npga\_ d1brup\_ g1jou.1 d1sgfa\_  
d1autc\_ g2hnt.1 g1kdq.1 d1orfa\_ d3s69a\_ d4crga\_ d1fxya\_ d1bqya\_  
d2ftba\_ d1pmpa\_ d2rcqa1 d1fdqa\_ d4lkpa\_ d1sa8a\_ d1vyfa\_ d1lpja\_  
d3vg7a1 d4azqa1 d1o8va\_ d5bvqa\_ d1p6pa\_ d2qo4a\_ d1opba\_ d1yiva1  
d1o1va\_ d4bvma1 d4tkba\_ d4i3ba\_ d1bwya\_ d1ftpa\_ d1ggla\_ d4gkca\_  
d1cbia\_ d3p6da1 d1kqwa\_ d2a0aa1 d1dzka\_ d4tlja\_ d2a2ua\_ d4wfva\_  
d3tlda\_ d4iaxa\_ d3zq3a\_ d2nnda\_ d1i4ua\_ d1kxo\_ d1bbpa\_ d1kt7a\_  
d1lexsa\_ d3s26a1 d1l1f7a\_ d1qfta\_ d4gh7a\_ d1z24a1 d1qabe\_ d1xkia\_  
d1ew3a\_ d3bx7a\_ d4iawa1 d1n0sa\_ d3kzaa\_ d2k23a\_ d2l9ca1 d2joza1  
d1gm6a\_ d3kffa\_ d3saoa1 d1e5pa\_ d1yupa1 d1iiua\_ d3lgia\_ d3i77a\_  
d2z9ia2 d4nsva\_ d1lcya2 d4jcna\_ d1os8a\_ d1hpga\_ d1p3ca\_ d1l1ja\_  
d1qtfa\_ d1e69a\_ d1mv5a\_ d3g60a4 g1ii8.1 d1ewqa2 d1ji0a\_ d1qhla\_  
d1v43a3 d2wmfa1 d1vpla\_ d1g2912 d4a82a2 g1f2t.1 d2d62a1 d3tuic1  
d2bbsa1 d3g60a3 d2ixea\_ d1g6ha\_ d1sgwa1 d2qi9c\_ d3rlfa1 d3b60a1  
d3d31a2 d2pzea1 g1xew.1 d1jj7a\_ d1oxxk2 d2onka1 d1wlwa\_ d1rwla\_  
d1z3ea1 d3l78a\_ d3gqba2 d1skye3 d1xp8a1 d1tf7a2 d1tf7a1 d1ye8a1  
d1skyb3 d2qe7d2 d4blta\_ d4huta\_ d3l1daa2 d4hyya\_ d2i3ba1 d1crla\_  
d3j9tb2 d3ntua2 d1vdza1 d2z43a\_ d1e9ra\_ d1nlfa\_ d3ziaa2 d1n0wa\_  
d1g6oa\_ d3ziad2 d3j9ta2 d1pzna2 d3gqbb2 d2i49a\_ d1nnfa\_ d1xvxa\_

d1h3da1 dliuda\_ d4m1va1 d1twya\_ d3e13x\_ d2nxa01 d4pfua\_ d3ttma\_  
d1elja\_ d2qmwa1 d1us5a\_ d1y3na1 d1jeta\_ d1uqwa\_ d4f19a1 d2esna2  
d3thia\_ d3fasa1 d2uyeb\_ d2xwva1 d1r9la\_ d2fyia1 d1pb7a\_ d2ozza1  
d1sw5a\_ d1nh8a1 d1vr5a1 d2g29a\_ d1xs5a\_ d3lswa\_ d2z23a\_ d3w9va\_  
d3tcha\_ d1q35a\_ d1z7me1 d3q27a\_ d1p99a\_ d1ve4a1 d2i6ea1 d4mcoa1  
d4n8ya\_ d1eu8a\_ d1zbma1 d1hsla\_ d1lixca2 d1j1na\_ d1xvya\_ d1y9ua\_  
d2z22a1 d1xoca1 d4oera\_ d1wdna\_ d5f1qa1 d1xt8a1 d1i6aa\_ d4gwoa\_  
d4igta1 d1pc3a\_ d4mmpa1 d1o63a\_ d2czla1 d2onsa2 d4mija1 d1eh3a\_  
d3skpa\_ d1dtza1 d1dtza2 d1ieja\_ d1jnfa2 d1ce2a1 d1jnfa1 d1b1xa2  
d1b1xa1 d1jw1a1 d1jw1a2 d1ryoa\_ d1h76a1 d1h76a2 d1c4oa1 d2p6ra3  
d2p6ra4 d1oywa2 d1oywa3 d1wrba1 d1w36b2 d1w36b1 d1c4oa2 d3bora\_  
d1t6na\_ d2eyqa5 d2eyqa3 d2eyqa2 d2zu6a2 d1veca\_ d1uaaa1 d1w36d1  
d2g9na1 d1z3ix2 d2rb4a\_ d1hv8a1 d1hv8a2 d1t5ia\_ d1w36c2 d2j0sa2  
d2j0sa1 d1fuka\_ d3hjha1 d1z5za1 d1qdea\_ d1z63a1 d1s2ma2 d1s2ma1  
d1wp9a1 d1wp9a2 d1gm5a3 d1gm5a4 d3dina4 d3dina3 d1q0ua\_ d1w36c1  
d1z3ix1 d1nkta3 d1uaaa2 d1w36d2 g1qhh.1 d2fwra2 d2fwra1 d3q3ma\_  
d1za0a1 d1mxra\_ d2inca\_ d1jk0a\_ d2incb\_ d1mhyb\_ d3hf1b\_ d1mtyb\_  
d1r2fa\_ d2uw1a\_ d1mhyd\_ d3n37a\_ d1afra\_ d1oquc\_ d1syya\_ d1mtyd\_  
d2olza\_ d1uzra\_ d1smsa\_ d2fkza\_ d1zujal d1s3qa1 d2fjca1 d1z6om1  
d1veia\_ d4dyya\_ d1jiga\_ d3gvya\_ d2pyba\_ d4cy9a1 d3bvfa1 d1r03a\_  
d2cf7a\_ d1nf4a\_ d1zs3a1 d4iwka\_ d3ka8a\_ d3np0x\_ d1n1qa\_ d1lb3a\_  
d4e6ka\_ d1z6oa1 d2fzfa1 d4dyua\_ d3ge4a\_ d1jgca\_ d4am4a\_ d2z6ma\_  
d1ji5a\_ d1vlga\_ d1lkoa1 d1krqa\_ d3qz3a\_ d1o9ra\_ d2ffxj\_ d1euma\_  
d1yv1a1 d2v2pa\_ d1j30a\_ d4di0a\_ d1dpsa\_ d1zx5a1 d1oewa\_ d2qzxa\_  
d2asia\_ d1psoe\_ d1miqa\_ d1smra\_ d2h6ta\_ d1pfza\_ d1lizda\_ d3hd8a\_  
d1j71a\_ d1dpja\_ d4aa9a\_ d1t6ex\_ g1b5f.1 g1lya.1 g1htr.1 d1qdma2  
d1bxoa\_ d1wkra\_ d1tzsa\_ d1libqa\_ d2qzwa\_ d1bdqa\_ d3ggta\_ d3ixoa\_  
d1mrxa\_ d2haha\_ d1tw7a\_ d4njsa\_ d1sgua\_ d2p3da\_ d1nsoa\_ d3d3ta\_  
d2rkfa\_ d1c6ya\_ d2rspa\_ d3ogpa\_ d3ekwa\_ d2o4na\_ d2j9ja\_ d1baia\_  
d3ggua\_ d3lzua\_ d4npua\_ d4j55a\_ d2r8na\_ d2fxda\_ d2p3ca\_ d4dqa\_  
d3ttpa\_ d3t3ca\_ d2p3aa\_ d2hc0a\_ d2fdda\_ d3mwsa\_ d1um8a\_ d1ixza\_  
d1qvra2 d1qvra3 d1sxjc2 d1jr3d2 d2p65a\_ d1l8qa2 d1g8pa\_ d3hu3a3  
d1sxjd2 d1njfa\_ d1in4a2 d1sxja2 d1tuea1 d2ce7a2 d1w5sa2 d1sxjb2  
d1d2na\_ d1ny5a2 d1ofha\_ d2gnoa2 d2a5yb3 d1fnna2 d1u0ja1 d1lv7a\_  
d1iqpa2 d2fnaa2 d1ixsb2 d4gita\_ d1sxje2 d1g41a\_ d1h4ra3 d4yl8a1  
d2a16a3 g1qmo.1 g1len.1 d3zyra\_ d1fnya\_ d1n47a\_ g21tn.1 d1avba\_  
d3usua\_ d1dhkb\_ d1f9ka\_ d1ukga\_ d1g8wa\_ d1g9fa\_ d1wbfa\_ d3wcsa\_  
d1g7ya\_ g1loe.1 d1mvqa\_ d1hq1a\_ d1v6ia\_ d1dbna\_ d1qnwa\_ d1fx5a\_  
d4l8qa\_ d3n35a\_ d1wgda1 d1wggal d4q5eb\_ d1wjna1 d1se9a\_ d3n3kb\_  
d1wz0a1 d1we6a1 d2m0xa\_ d2gbka\_ d3rt3b1 d1wh3a1 d1sifa\_ d2ekec2  
d4ii2b1 d4hk2a1 d1c3ta\_ d1m94a\_ d1wgha1 d1ttna1 d1j8ca\_ d1wx8a1  
d3v6cb1 d2ma9b\_ d4i6lb1 d1bt0a\_ d2jvca1 d1iyfa\_ d2k1fa\_ d1wxva1  
d1wf9a1 d1t0ya\_ d2io0b2 d1x1ma1 d2gbma\_ d1zw7a1 d2m17a\_ d1ud7a\_  
d1we7a1 d2lwp\_a\_ d2gbja\_ d1wjua1 d1v6ea1 d1v86a1 d4eewa\_ d1wiaa1

d4icva\_ d4gu2a\_ d1wx7a1 d1wy8a1 d4hjka1 d2faza1 d1v5oa1 d3ruib\_  
d1eo6a\_ d3waob\_ d2r2qa1 d3m95a\_ d3wana\_ d2a13a1 d2cr5a1 d1wj4a1  
d3nqyb\_ d4gera\_ d1bqba\_ d1dszb\_ d1a6ya\_ d3cbba\_ d1ynwa1 d1r4ia\_  
d1hcqa\_ d2hana\_ d2hanb\_ d2enval d1kb4b\_ d2n11b\_ d1l01a\_ d1cita\_  
d1adqa1 d1fnga1 d1uvqb1 d1zs8a1 d2vola1 d2vola2 d1mfb12 d2jelh2  
d1uwe12 d3qq4b1 d1kjob\_ d1k5na1 d1osph2 d4odh12 d1ow0a1 d1ow0a2  
d1bfob2 d3l9ra2 d3jtt1 d2fath2 d4elkb2 d1fn4b2 d2xfxb\_ d1pg7x2  
d1cqka\_ d4k71b2 d11k2a1 d1eapb2 d4l1fhg2 d1i4fa1 d2nw2a2 d1kfah2  
d1mhca1 d1h3ua1 d1wejh2 d1h0db2 d1a5fh2 d1kcvh2 d1mjuh2 d1qqda1  
d1kcrh2 d1k8ia1 d3huja2 d2nnab1 d1nfd2 d3mffb2 d1s9va1 d11k3h2  
d1q0x12 d1fv1b1 d1neza1 d4rfeb2 d1r3ha1 d1a6tb2 d1kjva1 d1pz5b2  
d1onqa1 d2bc4a2 d1de4a1 d1k8da1 d1tcra2 d1dn0b2 d1nfd2 d2xwtb2  
d1bfoa2 d1mexh2 d1iakb1 d1ypzf2 d4f7ea2 d1q7212 d2fbjh2 d1fe8h2  
d1clzh2 d1fngb1 d1uvqa1 d1vgka1 d1c16a1 d4j12a2 d4x99b2 d1igtb3  
d1je6a1 d1q72h2 d1nldh2 d1teth2 d2hmic2 d1i1ca2 d1i1ca1 d1k8ib1  
d1q0yh2 d1kfa12 d3frua1 d1pg7w2 d1u58a1 d1igyb4 d1igyb3 d1hyrc1  
d1klub1 d1deeb2 d1c12b2 d2bc4b2 d2ig2h2 d1kcv12 d3wn5b1 d11k2b\_  
d11k312 d1mju12 d1sm3h2 d1q0xh2 d1zvsal d1ydpal d1u8ib2 d1ypze2  
d1kcu2 d2l17a\_ d1n4na\_ d2m8bb1 d2kyqa\_ d3psma\_ d1jkza\_ d1jxca\_  
d2g11a\_ d4uj0a\_ d2k4ua\_ d1hp2a\_ d2lu9a\_ d1baha\_ d2meoa1 d1wm7a\_  
d1hlya\_ d1n8ma\_ d1j1za\_ d1wpda\_ d1c55a\_ d1pvza\_ d1wt7a\_ d1rjia\_  
d1wz5a\_ d1m2sa\_ d1pjva\_ d1c49a\_ d1qkya\_ d2ktca1 d1wmta\_ d1du9a\_  
d1j5ja\_ d1r1ga\_ d1t0za\_ d2i61a\_ d1t1ta\_ d1kv0a\_ d21kba\_ d1npia\_  
d1wwna\_ d1pe4a\_ d2kbka\_ d2li7a\_ d1djta\_ d2kbha\_ d1dq7a\_ d1sega\_  
d1omya\_ d1zywa1 d1jzaa\_ d1t61c1 d1iyjb4 d1iyjb5 d1iyjb3 d1o7ia\_  
d4ipca1 d1x3ea\_ d4apva\_ d1jb7a1 d1jb7a2 d1jb7a3 d3kdfa\_ d1ue1b\_  
d1wjja1 d3eiva\_ d1xjva2 d1xjva1 d2ccza2 d1se8a\_ d1l1oc\_ d1jb7b\_  
d1qvca\_ d3ulla\_ d1qzga\_ d1miua4 d1miua5 d1miua3 d1y14b1 d2nn6i1  
d1i941\_ d2zjra2 d1smxa\_ d2qamc2 d1hh2p1 d2r7da1 d1r12a2 d1wfqa1  
d3bzka4 d1x6oa2 d3a0ja\_ d2j01d2 d2ja9a1 d4q15a\_ d1hr0w\_ d1luza\_  
d2n3sa\_ d2vnud1 d1h95a\_ d1go3e1 d2nn6h1 d2mola\_ d1iz6a2 d1jjga\_  
d1e3pa2 d2ix0a3 d2ix0a2 d2lxja\_ d1ueba3 d1ueba2 d2z0sa1 d1u01a1  
d2ix0a1 d2eifa2 d2je6i1 d3i2za1 d2c35b1 d2ahob2 d1t9ha1 d3i4oa\_  
d2qall1 d1jt8a\_ d2nn6g1 d1g6pa\_ d3cama\_ d1i94q\_ d1c9oa\_ d1d7qa\_  
d2ba0a1 d2vnud2 d2vnud3 d1khia2 d2qalq1 d1wi5a1 d1xta2 d1ny4a\_  
d1pfsa\_ d2a1ka\_ d1rpma\_ d2shpa1 d1yfoa\_ d1l8ka\_ d2ooqa1 d1g4us2  
d1p15a\_ d1lara2 d1lara1 d1wcha\_ d2fh7a2 d2fh7a1 d1ohea2 d2f4da\_  
d1rxda\_ d2hxpa\_ d1xria\_ d1d5ra2 d1fpza\_ d3ezza\_ d4y2ea\_ d1i9sa\_  
d3azya\_ d3wvja\_ d1upsa1 d1ajoa\_ d2hyka\_ d1ajka\_ d2vy0a\_ d1o4ya\_  
d3o5sa\_ d3d6ea\_ d3atga\_ d1dypa\_ d1lumza\_ d3i4ia\_ d1tdha3 d1q3ba3  
d1ee8a3 d1k82a3 d4qmea2 d2xdta2 d1z5ha2 d3ubra\_ d1qo8a1 d1d4ca1  
d2k3va\_ d1ft5a\_ d1qdba\_ d1m1qa\_ d2j7aa\_ d1h21a\_ d1ogyb\_ d4fasa\_  
d1jnia\_ d1oaha\_ d1sp3a\_ d3h33a\_ d1rwja\_ d19hca\_ d1os6a\_ d3bxua\_  
d3h4na\_ d1i77a\_ d3caoa\_ d1j0pa\_ d2ctha\_ d1duwa\_ d1ofwa\_ d2e84a\_

d1hh5a\_ d1gyoa\_ d3h34a\_ d1wioa4 d1ccza2 d1vcaa1 d1dr9a2 d2d9qb1  
d2nxyb2 d2dara2 d2dara1 d1wyha2 d2dloa2 d1rutx4 d1rutx3 d2cuqa2  
d1x4la2 d1x4la1 d1x3ha2 d1x3ha1 d2d8za1 d1x61a2 d1x6aa1 d1x6aa2  
d2cora2 d2cora1 d1v6ga1 d1v6ga2 d2d8za2 d1x64a1 d1x64a2 d1b8ta1  
d2co8a1 d1x63a2 d2dj7a2 d2dj7a1 d2cu8a2 d2cu8a1 d1g47a2 d1g47a1  
d1j2oa1 d1wyha1 d2dloa1 d1wiga1 d1wiga2 d2cupa2 d2cupa3 d1x68a1  
d2d8ya2 d2d8ya1 d1m3va2 d1x62a1 d1x68a2 d1x61a1 d1b8ta3 d1b8ta2  
d2d8xa2 d2d8xa1 d1x4ka1 d1x4ka2 d2cuqa1 d1m3va1 d2co8a2 d1x63a1  
d2cura1 d2cura2 d1x62a2 d1op9a\_ d1y0la1 d1etzb1 d1egj11 d2gsib1  
d1nj9a1 d4jfh1 d1aqk11 d1t2ja\_ d1lo4h1 d1zvya1 d3v4v11 d4enec1  
d1kxtb\_ d5e8ea1 d2pxya\_ d4weud\_ d1xiwc\_ d2esvd1 d1qznh\_ d1logae1  
d1f4xh1 d4n1hb\_ d3ezjb1 d3mlw11 d1kfah1 d1etza1 d1b4jh1 d3cfic\_  
d4w68a\_ d2arja1 d1ek3a\_ d2ok0l1 d1vera\_ d1uwgh1 d1blnb1 d1fpth1  
d1rzga1 d2giya1 d4m3kb1 d1nc2a1 d2nyyd1 d1ncna\_ d1fbih1 d5dxwa\_  
d4fqqa1 d1dqdh1 d1jfq11 d1kelh1 d1faih1 d1frg11 d1fig11 d4m6n11  
d1fo0a\_ d4hxb11 d3b5ga\_ d3quyd1 d2h9gb1 d1i8kb\_ d2dd8h1 d2ck0h1  
d1eaja\_ d4w6wb1 d2a6ib3 d1t66d1 d2e27h\_ d1ob1b1 d1f11b1 d2v7na1  
d1ad0a1 d2xt1b1 d1pskh1 d4i13b1 d2op4l1 d1a0q11 d1uwel1 d1za3a1  
d1ncb11 d4uu9a\_ d1bm3h1 d1cloh1 d1nqba2 d1cf8h1 d4y5va\_ d1mhph1  
d5anma1 d4cdgc1 d4ldeb\_ d1y0lb1 d2pcpb1 d1z3g11 d1dfb11 d1fh5h1  
d3g5xa1 d1tzib1 d4dn3l1 d3zhka1 d2b1hh1 d2uyla1 d1f3dh1 d1nj9b1  
d2agjh1 d2h1p11 d1q72h1 d8fabb1 d1ndmb1 d1rjca1 d4u6hb1 d3upca\_  
d2fbj11 d1osph1 d1tvda\_ d2cjev\_ d4fhbd1 d1bd2d1 d1rz7h1 d3nn8a\_  
d1blna1 d1knoa1 d1nfd1 d2bmkb1 d1dq11\_ d1igyb1 d1igf11 d12e8h1  
d3utza1 d1nc2b1 d1rihh1 d4mwfb1 d4jvpa1 d1mieh1 d1rhfa1 d1fgn11  
d1sbs1 d1lp9e1 d1dn0a1 d4lqf11 d1iaih1 d1kgcd1 d1mh5b1 d1gpol1  
d2g60h3 d1f8t11 d2jixd1 d4grwh\_ d1fo0b\_ d1bfob1 d1axsa1 d1u9ka\_  
d1nmbh\_ d1h8na1 d1h8na2 d1jguh1 d4eura1 d3sdy11 d35c8h1 d1w72l1  
d1mvub\_ d1i9rh1 d1ob1a1 d4wenb\_ d1yeeh1 d3ietc1 d1f58h1 d1ad0b1  
d1mqk1\_ d1nbvh1 d4b50a\_ d3r8bb\_ d1baf11 d1mamh1 d4rgne1 d2gsgb\_  
d35c8l1 d1bafh1 d1ai1h1 d2pcpa1 d2fath1 d2x1pa\_ d1orsb1 d1ibgl1  
d1shma\_ d1a2yb\_ d1u0qa\_ d2coqa\_ d1hilb1 d1qfwi\_ d1jv5b\_ d1fn4b1  
d5e0qa\_ d1nsnh1 d1plgl1 d4ocx11 d1kb5h1 d1rzfh1 d1pg7x1 d2fx7h1  
d2oi9c\_ d1l7i11 d3eyva1 d1d5i11 d4ffyl\_ d1tet11 d1a6wh\_ d1lac6a\_  
d3dvfa\_ d1nfde1 d1mimh1 d1ri8a1 d1jhlh\_ d3dura\_ d1fskb1 d1f97a1  
d3so3b1 d2ak4d1 d1lp9f1 d4z7wf1 d1l7th1 d4y5ya\_ d4x7ec1 d1emth1  
d1ikf11 d1nlbh1 d4utal1 d1bjma1 d1eapb1 d1u6ah1 d2dtgd1 d1kj2b\_  
d1xeda1 d1cleh1 d1fgvh\_ d2bnub1 d2fb4h1 d2dtgb1 d1ktrh\_ d1jpth1  
d1qkz11 d4hepg\_ d2atpb1 d1flrh1 d2hrp11 d1mvfa\_ d1iaim1 d3k80a1  
d2jb5h1 d3zkxc\_ d4grwe\_ d1it9h1 d1rhhb1 d3w9ec\_ d1e4wh1 d1sy6h1  
d2j6eh1 d3qxta\_ d1jglh1 d1p7ka1 d1tzhb1 d4n8pa1 d1gaf11 d2jelh1  
d1wioa2 d4i0cc1 d1cicb1 d1lmka2 d1lmka1 d1iqwh1 d1orqb1 d1ejoh1  
d1jnlh1 d4zg1a\_ d43c9b\_ d1ggbl1 d1wejh1 d3q6fa1 d1f3dj1 d3c6la1  
d1bqlh1 d3p9wb\_ d1a3r11 d1h0db1 d2uzil\_ d1eo8l1 d1qfwl\_ d1n7ml1

d1igja1 d1c5ch1 d2a9mh\_ d1rmfh1 d1fj1b1 d4heme\_ d1ccza1 d1a5fh1  
d1ogad1 d1dlfh\_ d1qa9b\_ d1vgel1 d3qskb\_ d1sjxa\_ d4ozfg1 d1sq2n\_  
d1qd0a\_ d1kcvh1 d1c5db1 d3qcul1 d8faba1 d3bn9d1 d1mjuh1 d4y8dc\_  
d7fabh1 d3dvgb1 d1l0011 d1a6tb1 d1gigh1 d1kcrh1 d2hwz11 d1yjdc1  
d3clfl1 d4krna\_ d1d171\_ d1e6o11 d1mexh1 d3r0ma\_ d4kkna\_ d1fnsl1  
d1oaqh\_ d1rzia1 d1ucbh1 d1ncw11 d4b41a\_ d1nfd1 d2mpah1 d2d7t11  
d4grwf\_ d4b5ea\_ d1l1k3h1 d3u79a\_ d4u3xa\_ d1ghfl1 d1bvkb\_ d1mcww1  
d1b88a\_ d1jrhh1 d32c2b1 d4wemb\_ d1dsfh\_ d1op3h1 d1ce111 d1iqda1  
d1qoka1 d1qoka2 d1qfuh1 d2crya1 d1ay1h1 d1oaql\_ d3ab0b\_ d1rur11  
d1t4kb1 d1bz7b1 d1n0xh1 d1for11 d1ucb11 d4w6yb\_ d43c9a\_ d2aab11  
d1tzia1 d4n1ca\_ d1k6qh1 d3g9ab\_ d4tvsa1 d1igmh\_ d1pz5b1 d3dx9a1  
d3wxwh\_ d1nakh1 d1kcul1 d3eaka\_ d4qlra1 d1cr911 d1d9ka\_ d1f4x11  
d1deea1 d2i27n2 d1c12a1 d2orb11 d1j8hd1 d1mcph1 d1c5da1 d1kenh1  
d1bd2e1 d1h5ba\_ d4x7fc1 d3upaa\_ d1t3fa1 d1indh1 d2dtgc1 d4hc111  
d1zv5a1 d4wgvb\_ d1uwgl1 d4f37k1 d1aqkh1 d1vesa\_ d3zkqd\_ d1fpt11  
d1l0411 d1knob1 d3rrqa\_ d1ct8b1 d4orz\_ d1mlbb1 d4hgkc1 d1dqdl1  
d1bogb1 d4ozhe1 d1dr9a1 d1i7za1 d1dn0b1 d1kell1 d1rzi1 d1ypzf1  
d1wtla\_ d1hkfa\_ d1fail1 d1figh1 d2vyre\_ d1sjva\_ d1lohqa\_ d1bfoa1  
d1pkqb1 d1mjul1 d1b4j11 d1nsl1 d2arjb1 d1p4bh\_ d4aj0a\_ d3nn8b\_  
d2rcja1 d1f2xk\_ d4v1dd\_ d1adqh1 d2eksa\_ d4k3ga\_ d1jfqh1 d1uweh1  
d1frgh1 d4gftb\_ d1uz8b1 d4n1ea\_ d1bm311 d1clol1 d3mcka1 d2vq1a1  
d1ae6h1 d4aq1b1 d1uj3b1 d1nbqa1 d1fh511 d2ck011 d2ywza\_ d1q7211  
d4nxbx\_ d1hila1 d4hz1b1 d2j8811 d1zmya1 d1cd0a\_ d1a4ka1 d1psk11  
d1a0qh1 d4krmb\_ d1ncbh1 d2fbjh1 d1j8he1 d1i3ua\_ d1cf811 d1fe8h1  
d2p1ya1 d1eeqa\_ d2x89a\_ d1o10a\_ d2r01h1 d1ub5a1 d1dfbh1 d3eyvb1  
d4jdvb1 d4p2cg\_ d2gsia1 d2agj11 d1u3ha1 d2h1ph1 d1rih11 d1fskc1  
d1boga1 d2a7711 d1osp11 d1qfoa\_ d3dwta\_ d2fx711 d1rz711 d3stba1  
d1pkqa1 d1b6da1 d1dzba2 d1dzba1 d1kj2a\_ d4l1ha\_ d1rzgb1 d1dq1h\_  
d12e811 d1miel1 d1jmaa\_ d1sbs11 d1fgnh1 d1f5811 d1mqkh\_ d1ndgb1  
d3qeg11 d1ia11 d2aw2a1 d1tqbc1 d3fo2a1 d4dkaa\_ d1f8th1 d2g6011  
d2ywya\_ d1uj3a1 d1yc7a\_ d3bd3a\_ d4w6xb1 d1nmb1\_ d1i8ka\_ d1rj1b1  
d1ypze1 d1p7kb1 d1kxqe\_ d1gpoh1 d2z4qa1 d1w72h1 d1i9r11 d4qgya1  
d4xt1c\_ d2qqnh1 d1cica1 d3c08h1 d2cd0a\_ d2bdnh1 d1hnga1 d1mam11  
d1nldh1 d1cr9h1 d4lcih1 d3bkyh1 d3qg711 d1ai111 d1kxvc\_ d4iosd\_  
d1l7ih1 d2x1qa\_ d1ub6b1 d3k74b\_ d1libgh1 d1teth1 d1igya1 d1hxma1  
d2x6ma\_ d2e71a\_ d5e03a\_ d1qfwm\_ d2r0kh1 d1igjb1 d1rurh1 d1plgh1  
d1mj8h1 d1yuhb1 d3fmg11 d1rzfl1 d1emt11 d1ad9b1 d1igtb1 d1nlb11  
d1d5ih1 d3k7ua\_ d4ffyh\_ d1bwwa\_ d3dvga1 d1a6ta1 d1fgvl\_ d4qxgl1  
d1mim11 d1jh11\_ d2hffb1 d2hh011 d1qkzh1 d1l7t11 d1afvh1 d1iaii1  
d2cjuh\_ d1um5h1 d2ghwb2 d2ghwb1 d1kgce1 d2fgwh1 d1ikfh1 d1dvfd\_  
d2i24n1 d2xtjb\_ d1za3b1 d2yc1a\_ d2hh0h1 d2x1oa\_ d1bvka\_ d1rj1a1  
d5e7ba1 d1igta1 d1i11b1 d2fb411 d1mvua\_ d1jpt11 d32c2a1 d1fvca\_  
d1iqdb1 d2hrph1 d2p4ab\_ d4qo1a\_ d1p2cb1 d1wt5c\_ d1t4ka1 d5c1mb\_  
d1it911 d1bz7a1 d1b2wh1 d1e4w11 d1jnl11 d1yedb1 d1za6b1 d3u7aa\_



d1igfh1 d3gnml1 dlorsa1 dlwejl1 d1a2ya\_ dlhxmb1 dlgafh1 d2j4wh1  
d1pz5a1 d1j05a\_ d1a3rh1 d4fqll1 d1qfwh\_ d1eo8h1 d1n7mh1 d4s11a\_  
d1kegh1 d5da4a\_ d1iqwl1 d3whxb1 d1vgeh1 d1deeb1 d1c12b1 d1t2ql1  
d1ad9a1 d3gsnb1 d3b2uc1 d1ggbh1 d1t3fb1 d1nakl1 d4ocmc\_ d1lila1  
d2v7hb3 d2esve1 d1mcoh1 d2qr0b1 d2q3aa\_ d1ct8a1 d1kcr11 d2pxyb\_  
d2uzih\_ d5c3ld\_ d3durb\_ d2ak4e1 d1d17h\_ d1xiwd\_ d1mlba1 d1rmfl1  
d1i7zb1 d1dlfl\_ d2xa3a\_ d5bq7b1 d1dqqb1 d3h42l1 d1legjh1 d1kcvl1  
d1fe8l1 d2j6e11 d1f3rb2 d1l1k3l1 d1sm3h1 d1q0xh1 d1ghfh1 d7fabl1  
d1igch1 d1l00h1 d4idla\_ d5c2b1\_ d1jrh11 d1l11a1 d3zhda1 d4kfzc\_  
d1b0wa\_ d1e6oh1 d1mexl1 d4krpb\_ d1fnsh1 d1ncwh1 d4hgma\_ d4eigb1  
d4rzca\_ d2mpal1 d4y5xa\_ d5en2b1 d3lrga1 d4ej1c1 d1lrha1 d1j05b\_  
d1forh1 d1q9wb1 d2wzpd\_ d2aq2a1 d1h0da1 d3revb1 d2ij0c1 d1tzha1  
d4m7jl1 d1k6ql1 d3b9kc1 d1igml\_ d3qeau1 d1dsfl\_ d1celh1 d1kcu11  
d1zvha1 d1zvoa1 d1tqbb1 d1ay1l1 d2qsc11 d2cgrh1 d1n10h1 d1ken11  
d3eo0a1 d4n9ob1 d1n0xl1 d3k1kc\_ d2m9wa1 d3dfxa\_ d2aq2b1 d1ck1a1  
d1lenfa1 d1i4pa1 d1v1oa1 d1et9a1 d1esfa1 d2g9hd1 d4ohja1 d1klud1  
d1bxta1 d1eu3a1 d1ty0a1 d1fnua1 d2cqva1 d1fhga\_ d2k1ma\_ d2d12a1  
d1biha3 d1biha1 d1biha4 d3qp3a1 d1glca\_ d1gxea\_ d1cvsc2 d1cvsc1  
d1xmwa2 d1m4ka2 d2otpa2 d1biha2 d1rhfa2 d2fcba2 d2fcba1 d1wwbx\_  
d1gsma2 d1epfa1 d1epfa2 d2dava1 d1waaa\_ d1f97a2 d1x44a1 d1vcaa2  
d1fnla2 d1fnla1 d3b5ha2 d3h8na2 d3h8na1 d1jbj11 d1jbj12 d1pd6a\_  
d1f2qa2 d1f2qa1 d3cx2a\_ d1nbqa2 d3b5ha1 d1n26a1 d1xiwb\_ d1xaua\_  
d1fltx\_ d2ifga1 d1olla1 d1olla2 d1cs6a4 d1cs6a3 d1cs6a2 d1cs6a1  
d2gw5a2 d1sy6a1 d1xiwa\_ d1lucta2 d1lucta1 d1ry7b2 d1gl4b\_ d1qz1a3  
d1olza1 d2c9aa1 d1wwca\_

**Family-17 (b.1.1.1)**

**Positive dataset contains 319 protein sequences.**

d1y0la1 d2gsib1 d4jfh1 d1t2ja\_ d1zvy1 d3v4v11 d4enec1 d5e8ea1  
d2pxya\_ d4weud\_ d1xiwc\_ d2esvd1 d4n1hb\_ d3ezjb1 d3mlw11 d3cfic\_  
d4w68a\_ d2arja1 d2ok0l1 d1vera\_ d2giya1 d4m3kb1 d2nyyd1 d5dxwa\_  
d4fqqa1 d4m6n11 d4hxb11 d3b5ga\_ d3quyd1 d2h9gb1 d2dd8h1 d4w6wb1  
d2a6ib3 d1t66d1 d2e27h\_ d2v7na1 d2xt1b1 d4i13b1 d2op4l1 d1za3a1  
d4uu9a\_ d4y5va\_ d5anma1 d4cdgc1 d4ldeb\_ d1y0lb1 d1z3gl1 d3g5xa1  
d1tzib1 d4dn3l1 d3zhka1 d2b1hh1 d2uyl1 d2agjh1 d1rjca1 d4u6hb1  
d3upca\_ d2cjh\_ d4fhbd1 d3nn8a\_ d2bmb1 d3utza1 d4mwfb1 d4jvpa1  
d4lqf11 d2g60h3 d2jixd1 d4grwh\_ d1u9ka\_ d1nmbh\_ d4eura1 d3sdy11  
d1w72l1 d4wenb\_ d3ietc1 d4b50a\_ d3r8bb\_ d4rgne1 d2gsgb\_ d2fath1  
d2x1pa\_ d1shma\_ d1u0qa\_ d2coqa\_ d5e0qa\_ d4ocxl1 d2fx7h1 d2oi9c\_  
d3eyva1 d4ffyl\_ d3dvfa\_ d1ri8a1 d3dura\_ d3so3b1 d2ak4d1 d4z7wf1  
d4y5ya\_ d4x7ec1 d4utal1 d1u6ah1 d2dtgd1 d1xeda1 d2bnub1 d2dtgb1  
d4hepg\_ d2atpb1 d3k80a1 d2jb5h1 d3zkxc\_ d4grwe\_ d3w9ec\_ d1sy6h1  
d2j6eh1 d3qxta\_ d1tzhb1 d4n8pa1 d4i0cc1 d4zg1a\_ d3q6fa1 d3c6la1  
d3p9wb\_ d2uzil\_ d2a9mh\_ d4heme\_ d3qskb\_ d1sjxa\_ d4ozfg1 d1sq2n\_  
d3qcull d3bn9d1 d4y8dc\_ d3dvgb1 d2hwz11 d1yjdc1 d3clfl1 d4krna\_

d3r0ma\_ d4kkna\_ d4b41a\_ d2d7t1l d4grwf\_ d4b5ea\_ d3u79a\_ d4u3xa\_  
d4wemb\_ d2crya1 d3ab0b\_ d1t4kb1 d4w6yb\_ d2aab1l d1tzia1 d4n1ca\_  
d3g9ab\_ d4tvsa1 d3dx9a1 d3wxwh\_ d3eaka\_ d4qlra1 d2i27n2 d2orbl1  
d4x7fc1 d3upaa\_ d1t3fa1 d2dtgc1 d4hc1l1 d1zv5a1 d4wgvb\_ d4f37k1  
d1vesa\_ d3zkqd\_ d3rrqa\_ d4orz\_ d4hgkc1 d4ozhe1 d1ypzf1 d2vyre\_  
d1sjva\_ d2arjb1 d4aj0a\_ d3nn8b\_ d2rcja1 d4v1dd\_ d2eksa\_ d4k3ga\_  
d4gftb\_ d1uz8b1 d4n1ea\_ d3mcka1 d2vq1a1 d4aq1b1 d1uj3b1 d2ywza\_  
d4nbxb\_ d4hz1b1 d2j881l d1zmya1 d4krmb\_ d2p1ya1 d2x89a\_ d2r01h1  
d3eyvb1 d4jdvb1 d4p2cg\_ d2gsia1 d2agj1l d1u3ha1 d2a771l d3dwta\_  
d2fx7l1 d3stba1 d4l1ha\_ d3qeg1l d2aw2a1 d1tqbc1 d3fo2a1 d4dkaa\_  
d2g60l1 d2ywya\_ d1uj3a1 d1yc7a\_ d3bd3a\_ d4w6xb1 d1rj1b1 d1ypzel  
d2z4qa1 d1w72h1 d4qgya1 d4xt1c\_ d2qqnh1 d3c08h1 d2bdnh1 d4lcih1  
d3bkyl1 d3qg7l1 d4iosd\_ d2x1qa\_ d3k74b\_ d2x6ma\_ d2e71a\_ d5e03a\_  
d2r0kh1 d3fmg1l d3k7ua\_ d4ffyh\_ d3dvga1 d4qxgl1 d2hffb1 d2hh01l  
d2cjuh\_ d1um5h1 d2ghwb2 d2ghwb1 d2i24n1 d2xtjb\_ d1za3b1 d2ycla\_  
d2hh0h1 d2x1oa\_ d1rj1a1 d5e7ba1 d2p4ab\_ d4qo1a\_ d1wt5c\_ d1t4ka1  
d5c1mb\_ d1za6b1 d3u7aa\_ d3gnm1l d2j4wh1 d4fq1l1 d4s11a\_ d5da4a\_  
d3whxb1 d1t2q1l d3gsnb1 d3b2uc1 d1t3fb1 d4ocmc\_ d2v7hb3 d2esvel  
d2qr0b1 d2q3aa\_ d2pxyb\_ d2uzih\_ d5c3ld\_ d3durb\_ d2ak4e1 d1xiwd\_  
d2xa3a\_ d5bq7b1 d3h421l d2j6e1l d4idla\_ d5c2b1\_ d3zhda1 d4kfzc\_  
d4krpb\_ d4hgma\_ d4eigb1 d4rzca\_ d4y5xa\_ d5en2b1 d3lrga1 d4ej1c1  
d2wzpd\_ d2aq2a1 d3revb1 d2ij0c1 d1tzha1 d4m7j1l d3b9kc1 d3qeua1  
d1zvha1 d1zvoa1 d1tqbb1 d2qsc1l d3eo0a1 d4n9ob1 d3k1kc\_

**Negative dataset contains 3167 protein sequences.**

d1xfda2 d1m32a\_ d1libja\_ d1c7na\_ d1iuga\_ d4q75a\_ d2bkwa1 d1t3ia\_  
d1n8pa\_ d1qz9a\_ d1jf9a\_ d1leg5a\_ d1p3wa\_ d3kgwa\_ d1c11a\_ d2ctza1  
d2rfva\_ d1gc0a\_ d1cs1a\_ d1d2fa\_ d2ch1a1 d1qgna\_ d1pffa\_ d1elua\_  
d1u08a\_ d1lc5a\_ d1b5pa\_ d2ay1a\_ d1bw0a\_ d3pd6a\_ d7aata\_ d2csta\_  
d1fg7a\_ d4wlha\_ d1o4sa\_ d1v2da\_ d1gdea\_ d1m6sa\_ d1v72a1 d1svva\_  
d1ajsa\_ d1wsta1 d2f8ja2 d1lk9a\_ d1vp4a1 d1xi9a1 d2gb3a1 d1yaaa\_  
d1xkla\_ d2wfla\_ d1tq5a1 d2b5aa1 d2ofya1 d4mcxa\_ d2xi8a\_ d2icta\_  
d2bnma1 d2ppxa1 d1y7ya1 d1sefa\_ d1sfna\_ d1rc6a\_ d3lgia\_ d3i77a\_  
d2z9ia2 d4nsva\_ d1lcya2 d4jcna\_ d1agja\_ d1hpga\_ d1p3ca\_ d1l1ja\_  
d1qtfa\_ d1ddla\_ d1e57b\_ d1dzka\_ d4tlja\_ d2a2ua\_ d4wfva\_ d3t1da\_  
d4iaxa\_ d3zq3a\_ d2nnda\_ d1i4ua\_ d1kxoa\_ d1bbpa\_ d1kt7a\_ d1exsa\_  
d3s26a1 d1lf7a\_ d1qfta\_ d4gh7a\_ d1z24a1 d1qabe\_ d1xkia\_ d1ew3a\_  
d3bx7a\_ d4iawa1 d1n0sa\_ d1gkab\_ d3kzaa\_ d2k23a\_ d2l9ca1 d2joza1  
d1gm6a\_ d3kffa\_ d3saoa1 d1e5pa\_ d1yupa1 d1iiua\_ d2wo3b\_ d1shxa\_  
d1f56a\_ d1bypa\_ d1azca\_ d1ws8a\_ d3u25a\_ d1cuoa\_ d1id2a\_ d1rkra\_  
d2iaac\_ d4dp1x\_ d1nwpa\_ d2gima\_ d2i7sa\_ d1qhqa\_ d3ehbb1 d1fftb1  
d1gyca3 d1hfua2 d1kbva1 d1kbva2 d1sdda1 d1sdda2 d1gyca1 d1gyca2  
d1mzya1 d2bw4a1 d1aoza1 d1aoza3 d1aoza2 d1kyaa2 d1kyaa3 d1kyaa1  
d1mzya2 d4e9sa1 d1sddb1 d1sddb2 d1hfua1 d1hfua3 d1oe1a2 d1oe1a1  
d1v10a2 d1v10a3 d1v10a1 g1f8v.1 d2bbvc\_ d2cfba1 d1dfoa\_ d1o69a\_

d1bj4a\_ d3k28a\_ d2bwpa\_ d3lg0a\_ d2fnua\_ d3ou5a\_ dlz7da1 d1b9ha\_  
dliaya\_ d4msoa\_ d1bs0a\_ d1s0aa\_ d1sffa\_ d3tqxa\_ d3qboa\_ d3pgya\_  
d1bjna\_ d2dkja\_ d1ejia\_ d1vefa1 d4wxga\_ d3bs8a\_ d3gbxa1 d1w23a\_  
d1a3qa1 d1liknc\_ d3brda1 d1p7h11 d1oy3c\_ d1imhc1 d1zk9a1 d2cxka1  
d2bema\_ d1pama1 d1ea9c1 d1qhoa1 d2fhfa2 d2fhfa1 d1k3ia1 d1j0ha1  
d1cxlal d2bhua1 d1ledqa1 d1f1sa2 d1ut9a2 d1gvia1 d1txka1 d1zx5a1  
d1qwra\_ d2phla1 d1fxza2 d1fxza1 d1lrha\_ d1uija1 gldgw.1 d2v09a\_  
d1uika2 d1uika1 d1dgwa\_ d1ep0a\_ d2pa7a1 d1wlta1 d1nxma\_ d2c0za1  
d1ds6b\_ d1fstb\_ d4alac\_ d1pjwa\_ d1s6na\_ d3uzqb\_ d1cg2a1 d1yloa2  
d1y7ea2 d1y0ya3 d1lfwa1 d1vixa1 d1fnoa4 d1vhua2 d1ysja1 d1vhea2  
d1z2la1 d2fvga2 d1vgya1 d1r3na1 d2grea2 d1xmba1 d1rtqa\_ d1ydwa2  
d2nvwa2 d1zh8a2 d1qkia2 d1xeea2 d1t1ta2 d1g7ea\_ d2ovga\_ d1sq8a\_  
d1rzsaa\_ d3kz3a\_ d3orca\_ d3gpdg2 d2q49a2 d1hdgo2 d2g17a2 d2cvoa2  
d2czca1 d3pwka2 d1obfo2 d1i32a2 d1zyao2 d2pkqo2 d1b7go2 d2hjsa2  
d1cf2o2 d1vkna2 d1nvm2 d2msya\_ d2djoa1 d2r5za\_ d1au7a1 d1f43a\_  
d2lmda1 d1akhb\_ d1s7ea1 d3nara\_ d1zq3p1 d2craa1 d1mija\_ d4uuta\_  
d3a01a\_ d1x58a1 d3rkqa1 d3cmya1 d2cqxa1 d2da6a1 d1e3oc1 d1fjla\_  
d1mh3a1 d1lig7a\_ d1x41a1 d1wh7a1 d1gt0c1 d2mw8a\_ d1lfup\_ d1x2ma1  
d1b72a\_ d1wi3a1 d1jgga\_ d1wjha1 d1x2na1 d1mnmc\_ d2cuea1 d3k2aa\_  
d2hosa\_ d2jwta2 d1pufa\_ d1oetc1 d2hi3a\_ d1b8ia\_ d4j19a\_ d3lnqa\_  
d1wh5a1 d1b8ib\_ d1fexa\_ d2cqra1 d1ug2a1 d2cqqa1 d2ajea1 d4a69c\_  
d1h8ac1 d2crga1 d2iw5b1 d1xc5a1 d1ofcx1 d2cu7a1 d1wgxa1 d2cjja1  
d2ckxa1 d1gvda\_ d1xg1a1 d1itya\_ d1hlva1 d1iufa2 d1iufa1 d2iu5a1  
d1zk8a1 d2g7sa1 d2fd5a1 d2np5a1 d1z0xa1 d2id6a1 d2d6ya1 d2i10a1  
d1vi0a1 d2oi8a1 d3c07a1 d2ns7a1 d2fq4a1 d2yvea1 d1t33a1 d2o7ta1  
d1rkta1 d2np3b1 d2g7ga1 d2gena1 d2fbqa1 d2g7la1 d2gfna1 d2g3ba1  
d2jj7a1 d2hyja1 d1sgma1 d1ui5a1 d2hkua1 d2id3a1 d4jyka1 d3lv8a\_  
d1s3ga1 d1zaka1 d1s4qa\_ d3tvta2 d1uf9a\_ d1khta\_ d1ckea\_ d1losna\_  
d1p5zb\_ d4tmka\_ d3cm0a\_ d1tmka\_ d1jaga\_ d3h86a\_ d1t0hb\_ d1nn5a\_  
d2h92a\_ d3kb2a1 d2c95a1 d1yj5a2 d1kgda\_ d1ly1a\_ d2ak3a1 d1vyva2  
d1deka\_ d2grja1 d1p3ja1 d1y63a\_ d1e4ya1 d1s96a\_ d3iija1 d1lvga\_  
d1nksa\_ d1vyua2 d4e22a\_ d1qf9a\_ d1jjva\_ d1q3ta\_ d1ki9a\_ d1lw7a2  
d1teva\_ d1kjwa2 d1gsia\_ d1g3ma\_ d1j99a\_ d1t8ta1 d1nsta\_ d1fmja\_  
d1zrha\_ d1ls6a\_ d2a3ra\_ d1aqua\_ d2zptx\_ d3ckla\_ d1teta\_ d1q44a\_  
d2gwha\_ d1z0ja1 d3umra2 d3gj0a1 d2gaoa1 d1yzga1 d1x3sa1 d1g7sa4  
d1puja\_ d1udxa2 d1kk1a3 d2o52a\_ d1jwyb\_ d1zcaa2 d1zcba2 d2fv8a1  
d2cjwa\_ d3dz8a1 d1xzpa2 d1vg8a\_ d4qxaa\_ d2ew1a1 d1x1ra1 d2bcgy\_  
d3doea1 d3cona\_ d3rega\_ d3wyga\_ d1upta\_ d2b6ha1 d1zd9a1 d1r5ba3  
d1n0ua2 d1r2qa\_ d2f9la1 d2rhda\_ d3q3jb\_ d3q85a\_ d1efma1 d1r8qa\_  
d2gf9a1 d2akab1 d1ek0a\_ d1z08a1 d2gcoa1 d2dy1a2 d4g01b\_ d2cxxa1  
d1svia\_ d3q72a\_ d1ni3a1 d4ac9a4 d2erxa1 d2bmea\_ d1wxqa1 d2gf0a1  
d4ldja1 d1zunb3 d1d5ca\_ d4lv5b\_ d1efca3 d1kmqa\_ d2g6ba1 d3lrpa\_  
d1tada2 d2y8ea\_ d4rd4a1 d1z06a1 d2heia\_ d3a58b\_ d1u0la2 d1d2ea3  
d1zj6a1 d2ocba\_ d3rwoa\_ d1mr3f\_ d2e9sa1 d4u5xa1 d2iwra\_ d2fn4a1

d3bwdd\_ d2nzja1 d2atva1 d2ksqa\_ d3l43a\_ d1mkya2 d1mkya1 d1wmsa\_  
d1jnaya3 d2rmka\_ d1f6ba\_ d1f60a3 d1gota2 d1jala1 d2fh5b1 d1g16a\_  
d2wblc\_ d1m7ba\_ d1wf3a1 d1f5na2 d1t9ha2 d1z6xa1 d1z0aa1 d2fg5a1  
d2a5ja1 d2bcjq2 d1s0ua3 d1ky3a\_ d4y0va\_ d4lhwa\_ d2qmea1 d2atxa1  
d1legaa1 d1ryha\_ d1moza\_ d1nrjb\_ d2erya1 d3bfka\_ d1puia\_ d1fzqa\_  
d3j3az1 d3t5ga\_ d1shza2 d3defa\_ d2f7sa1 d3raba\_ d3tsoa\_ d3aq4a\_  
d2a17a1 d3sfva1 d3bc1a\_ d2ncda\_ d1sdma\_ d3h4sa1 d2heha\_ d2grya\_  
g3kin.1 d1br2a2 d1goja\_ d1f9va\_ d2mysa2 d1lkxa\_ d3t0qa\_ d4db1a1  
d3gbja\_ d1ry6a\_ d1v8ka\_ d1k8ka2 d1k8ka1 d3uleb1 d3i33a2 d3i33a1  
d1bupa1 d1dkgd2 d1dkgd1 d4ci6a2 d1jcfa1 d4a2ba2 d2fxua1 d1yaga2  
d1yaga1 d4cbua2 d1bupa2 d3vrda1 d3vrda2 d1fcdc2 d1fcdc1 d1h1oa2  
d1h1oa1 d1m70a2 d1iqca2 d1iqca1 d1eb7a1 d1nmla2 d1nmla1 d1nira1  
d1qksa1 d3h1jd1 d2d0oa3 d2d0oa2 d1nbwa3 d1hroa\_ d4gedb\_ d3zooa\_  
d1mz4a\_ d1gu2a\_ d1f1fa\_ d1dvva\_ d1c6ra\_ d1c75a\_ d1e29a\_ d1gdva\_  
d1cnoa\_ d1h32b\_ d1co6a\_ d2bh4x\_ d2aiua\_ d5cytr\_ d1jdl\_ d1i8oa\_  
d2zboa\_ d3dmia\_ d1ls9a\_ d1wvec\_ d2yk3a\_ d3ph2b\_ d1dw0a\_ d5aura\_  
d1ql3a\_ d1qn2a\_ d1f1ca\_ d4zzva\_ d2xspa\_ d1eg1a\_ d4v20a\_ d1ojja\_  
d4ipma1 d1gpia\_ d4csia\_ d3pfza\_ d3ovwa\_ d2yoka\_ d1prtc2 d1levsa\_  
d1cnt1\_ d1pvhb\_ d1z7ca\_ d1huwa\_ d1bgea\_ d1rhga\_ d1f6fa\_ d1i1rb\_  
d1axia\_ d1etea\_ d3tgxb\_ d1scfa\_ d2z3qa1 d3qb1a\_ d1hula\_ d1m48a\_  
d4nkqb\_ d1eera\_ d1v7mv\_ d5e4ea\_ d2o27a\_ d3b5ka\_ d2psma1 d4zf7a\_  
d3uf5a\_ d4x51a\_ d1d9ca\_ d4ypgc1 d3oq3a\_ d1lqsl\_ d1n1fa\_ d1aula\_  
d1wu3i\_ d3bes1\_ d3ux9a\_ d2ejca\_ d3muea1 d1ihoa\_ d3q12a1 d4dnxa2  
d1m8pa2 d1g8fa2 d1jhda2 d1x6va2 d2e17a\_ d1iq0a2 d1irxa2 d1r6ta2  
d1ivsa4 d2cyba\_ d1rqga2 d1j09a2 d2yxna\_ d1f7ua2 d1h3fa1 d1ffya3  
d2g36a1 d1nzja\_ d1jila\_ d1n3la\_ d1pfva2 d1h3na3 d3n9ia\_ d3sz3a1  
d3sw2a\_ d1moxc\_ d1dx5i3 d1edmb\_ d1aut12 d1aut11 d1nqlb\_ d1dva11  
d1szba2 d1kigl\_ d2y5f1\_ d1ijqa2 d1lgk5a\_ d1g1sa2 d1nt0a3 d1xdtr\_  
d1lmja2 d1lmja1 d1nzia2 d2wphe\_ d1klil\_ d1pfx12 d1pfx11 d1p9ja\_  
d1g1ta2 d1f7ea\_ d4yzub\_ d1m1xb5 d2y5ia\_ d1qlsa\_ d1psra\_ d3n22a\_  
d2egda\_ d4ggfc\_ d2wcea\_ d2luca\_ d4aqia\_ d3nsia\_ d2lp3a\_ d1j55a\_  
d1a4pa\_ d1k8ua\_ d1nsha\_ d1pvaa\_ d3fs7a\_ d2pvba\_ d1ttxa\_ d1rwy\_ d1rwya\_  
d2kyfa\_ d1rk9a\_ d1exra\_ d1tiza1 d1g8ia\_ d1ggwa\_ d1wdcc\_ d3fwba\_  
d1ggza\_ d2o5ga\_ d1ctaa\_ d1m45a\_ d3i5gc\_ d1sl8a\_ d1fpwa\_ d2scpa\_  
d2roaa\_ d4aqra\_ d3pn7b\_ d1br1b\_ d2mysb\_ d1s6ca\_ d1bjfa\_ d2obha\_  
d1jfka\_ d1jf0a\_ d1qv0a\_ d1lkja\_ d2mlfc\_ d2m97a\_ d2d8na\_ d4by5a\_  
d1jbaa\_ d4nqga\_ d1wdcb\_ d2mysc\_ d1j7qa\_ d1s6ia\_ d1uhka2 d1r2ua\_  
d1dtla\_ d3kf9a\_ d3pn7c\_ d5d67d\_ d1tuza\_ d1h8ba\_ d1leg3a1 d1leg3a2  
d2zkmx1 d1snla\_ d1gjya\_ d1y1xa\_ d1hqva\_ d1dvia\_ d1df0a1 d1qxp2  
d4usla\_ d1k94a\_ d1wkya2 d1uuqa\_ d3wh9a\_ d4m1ra\_ d1xyza\_ d4xuya\_  
d2je8a5 d4bf7a1 d3cuia\_ d1ur4a\_ d1qw9a2 d1odza\_ d2vzsa5 d1bqca\_  
d2x2ya1 d1hjqa\_ d1qnra\_ d4y7ea1 d4k68a\_ d2v3ga\_ d4hpga\_ d1nofa2  
d1nq6a\_ d1h4pa\_ d1aq0a\_ d3ziza\_ d4bs0a\_ d1ecea\_ d1h1na\_ d1ta3b\_  
d1w91a2 d1i1wa\_ d1uhva2 d1us3a2 d1legza\_ d7a3ha\_ d1tvna1 d3nyda1

d1ghsa\_ d2cyga1 d4xv0a\_ d2c8na2 d1w32a\_ d3emca\_ d1v6ya1 d1foba\_  
d2uwfa1 d2fgla\_ d3niya1 d2c0ha1 d1rh9a1 d1yq2a5 d1szna2 d1fa2a\_  
d1pama4 d5do8a1 d1ea9c3 d1hx0a2 d2fhfa5 d1qhoa4 d1avaa2 d1m53a2  
d4m8ua1 d2gjpa2 d1lwaha2 d4howa1 d1ktba2 d1j0ha3 d3vm5a1 d2x1ia\_  
d1wzaa2 d1uasa2 d2diea1 d1mxga2 d1ht6a2 d1eswa\_ d1iv8a2 d5cpsa\_  
d1ud2a2 d1zjaa1 d3gbea1 d1kwga2 d1wdpa\_ d1gcya2 d1g5aa2 d1hvxa2  
d3dhpa2 d2bhua3 d4do4a1 d3qgva1 d1e43a2 d1g94a2 d2d3na2 d1gjwa2  
d1gvia3 d1x1na1 d1r7aa2 d1tz7a1 d4c7ga2 d2gjxa1 d1nowa1 d1yhta1  
d4toqa\_ d1wb0a1 d1w9pa1 d1eoka\_ d1itxa1 d1kfwal d1goia2 d1ledqa2  
d2gsja\_ d1hjxa1 d1jnda1 d1vf8a1 d1etob\_ d1lumqa\_ d1e5wa2 d1j19a2  
d1isna2 d2a16b2 d3syxa1 d1mkea1 d2p8va\_ d1xoda1 d1i7aa\_ d1levha\_  
d1qc6a\_ d1egxa\_ d2y8ga\_ d1xkea1 d1k5db\_ d2y8fa\_ d1iuka\_ d2csua1  
d3q9ub\_ d2yv1a1 d3q9na\_ d2d59a\_ d1oi7a1 d2yv2a1 d1leuca1 d1y81a1  
d1wgqa1 d1v89a1 d2coda1 d1zc3b\_ d1wg7a1 d1u5ea1 d1v61a1 d2coca1  
d2ys1a1 d1v5pa1 d1nty2 d1wjma1 d1wi1a1 d1u29a\_ d1xx0a1 d1unqa\_  
d2zkmx3 d1fhoa\_ d1v88a1 d2adza1 d1x1fa1 d1p6sa\_ d2coaa1 d1btka\_  
d1v5ma1 d1faoa\_ d2x18a\_ d1dyna\_ d1x1ga1 d4kaxb\_ d2j59m1 d1xcga2  
d1txda2 d1u5da1 d1dbha2 d1wl1ha\_ d1upqa\_ d1v5ua1 d1foea2 d2fj1a1  
d1eaza\_ d2dfka2 d2cofa1 d1kz7a2 d91dta1 d2ewda3 d1up7a1 d2dfda1  
d1s6ya1 d1vjta1 d7mdha1 d1hyea1 d1t2da1 d1oj3a3 d1b8pa1 d1ldna1  
d1hyha1 d1civa1 d2a92a1 d1ez4a1 d1i0za1 d1y6ja1 d1gv0a1 d1ur5a1  
d1ll1da1 d1obba1 d1v8ba1 d1gdha1 d1l7da1 d2dlda1 d1mx3a1 d1ygya1  
d1li4a1 d1j4aa1 d2naca1 d1npya1 d3t4ea2 d1a4ia1 d1o0sa1 d2hk9a2  
d2egga2 d1b26a1 d1bvua1 d1gq2a1 d1c1da1 d1leha1 d1gtma1 d1leuza1  
d1nvtal d3dona2 d1ledza1 d1vi2a1 d1p77a1 d1nyta1 d1b0aa1 d1vl6a1  
d1v9la1 d3wdpp1 d3wq5a\_ d1gnxa\_ d4gxpa\_ d4hz8a\_ d1e4mm\_ d3aiua\_  
d1wcca1 d1qvba\_ d3ahxa\_ d1v02a\_ d2dgaa\_ d1pbga\_ d1vffa1 d1qoxa\_  
d4ha4a\_ d1kola2 d1f8fa2 d1qora2 d1jqba2 d1vj0a2 d1cdoa2 d1gu7a2  
d1d1ta2 d1xa0a2 d2dm6a2 d1jvba2 d1rjwa2 d1llua2 d1h2ba2 d1tt7a2  
d1piwa2 d1o89a2 d1iz0a2 d1e3ja2 d1yb5a2 d1uufa2 d1e3ia2 d3gpdg1  
d1vc2a1 d2nvwa1 d1u8fo1 d1ydwa1 d1hdgo1 d2g17a1 d1cf2o1 d2czca2  
d1r0ka2 d1obfo1 d2cvoa1 d1ebfa1 d1h6da1 d1i32a1 d1zh8a1 d2q49a1  
d1qkia1 d3pzra1 d1xeea1 d1vkoa1 d1vm6a3 d3qvsa1 d2pkqo1 d1b7go1  
d1gr0a1 d1p1ja1 d1lc0a1 d1j0xo1 d3pwka1 d2hjsa1 d1zyao1 d1vkna1  
d1tltal d1nvmb1 d3sjua\_ d3ojfa1 d1xu9a1 d2jjya1 d1n7ha\_ d1y1pa1  
d1h5qa\_ d1jtv\_a\_ d4fs3a\_ d2bkaa1 d1gy8a\_ d2c5aa1 d1ulsa\_ d1ooea\_  
d2b69a1 d1y5ma1 d1spxa\_ d1aela\_ d1bxka\_ d1ydea1 d1gega\_ d1hdoa\_  
d1o5ia\_ d1e6ua\_ d1snya1 d2rhca\_ d3zv4a\_ d5ceja\_ d2d1ya1 d1fjha\_  
d3w8ea\_ d2fmua1 d1x1ta\_ d1rpna\_ d3ay7a1 d1k2wa\_ d1eq2a\_ d2hrba1  
d3ruaa\_ d2ew8a1 d4hwka\_ d1xgka\_ d2bd0a1 d1yo6a1 d2a35a1 d2ntva\_  
d1vl8a\_ d1hdca\_ d4bkua\_ d2ag5a1 d2q45a\_ d1nffa\_ d4iy1a\_ d1zbqa1  
d1kewa\_ d1ek6a\_ d1ja9a\_ d2q46a2 d1iy8a\_ d1cyda\_ d2ptga\_ d1hxha\_  
d1uzma1 d3lyla\_ d4m89a\_ d3weya\_ d2b1la1 d1w6ua\_ d1sb8a\_ d2q2va\_  
d4nr0a\_ d1e6wa\_ d2gasa\_ d3oiga1 d2bgka1 d1mxha\_ d1vl0a1 d1rkxa\_

d1r6da\_ d1wmaa1 d1e7wa\_ d2c07a1 d1xkqa\_ d3tzha\_ d1g0oa\_ d3lz6a\_  
d1qyca\_ d1ledoa\_ d1gz6a\_ d1loc2a\_ d1t2aa\_ d1zema1 d2xoxa\_ d1z45a2  
d1geea\_ d1p33a\_ d31t0a\_ d4e6pa\_ d2wyua\_ d1db3a\_ d4q9na\_ d1xhla\_  
d4o1ma\_ d1fmca\_ d2uvda\_ d2gdza1 d1uaya\_ d2z1ma\_ d2o23a2 d2fr1a2  
d2fr1a1 d1qsga\_ d1qyda\_ d4zjua\_ d2a4ka1 d1yb1a\_ d1wvga1 d1yxma1  
d3f4ba\_ d1mg5a\_ d1xg5a1 d2gfoa1 d1vjva\_ d2ayna1 d3nhea\_ d1cmxa\_  
d1xd3a\_ d3ifwa\_ d1mdwa\_ d1ziva1 d1zcmal d1t3ca\_ d1lepwa3 d2a97a\_  
d3fiea\_ g1e1h.1 d3ioqa\_ d1fh0a\_ d1o0ea\_ d1khqa\_ d1m6da\_ d2cb5a\_  
d1cs8a\_ g8pch.1 d1s4va\_ d2pnsa\_ d1vsna1 d1mira\_ d1iwda\_ d2oula\_  
d7pcka\_ d3bwka\_ d3bcna\_ d2p86a\_ d1pvja\_ d1pcia\_ d1gece\_ d1deua\_  
d4bs6a\_ d1xkga1 d1cqda\_ d1jqpa2 d2c0ya\_ d2bdza\_ d3p5ua\_ d1ex4a2  
d1c6va\_ d2jk6a2 d2jk6a1 d1feca1 d1feca2 d1lpfa1 d1lpfa2 d1xhca1  
d1xhca2 d1dx1a2 d1dx1a1 d1gera2 d1m6ia2 d1onfa2 d3lada2 d3lada1  
d1w4xa1 d1w4xa2 d1gesa2 d1mo9a1 d1xdia1 d1f12a2 d1f12a1 d1fcda1  
d1fcda2 d1h6va2 d1h6va1 d1mo9a2 d1gv4a2 d1gv4a1 d2gv8a2 d2gv8a1  
d1aoga1 d1aoga2 d1hyua1 d1ebda1 d1ebda2 d3dk9a1 d1qlra2 d1qlra1  
d1gesa1 d1g4ma1 d1g4ma2 d1ps9a2 d1o94a2 d1lqta1 d1pn0a1 d1reoal  
d1ju2a1 d2f5va1 d3c96a1 d2gmha1 d1pj5a2 d1gpea1 d1n4wa1 d1k0ia1  
d2dw4a2 d2ivda1 d1seza1 d2voua1 d1kdga1 d1s5ja1 d2hbja2 d2igia\_  
d1wlja\_ d1qhta1 d4dlea1 d1tgoa1 d2f96a1 d3tr8a1 d3mxma\_ d1q8ia1  
d1y97a1 d1w0ha\_ d1kfsa1 d2py5a1 d1noya\_ d1d5aa1 d1yt3a3 d2guia\_  
d3mwpal d4kbl1a\_ d1xl4a1 d3vsqa\_ d2gixa1 d1p7ba1 d1b9ra\_ d1offa\_  
d1frra\_ d3wcqa\_ d1e9ma\_ d1l5pa\_ d1lwria\_ d1i7ha\_ d3av8a\_ d1czpa\_  
d1rfka\_ d3p1ma1 d3b2ga\_ d2bt6a2 d2av4a1 d3nvva1 d1krha3 d2h88b1  
d1n62a2 d1t3qa2 d1kf6b2 d1zoyb1 d1jq4a\_ d1dgja2 d1rm6c2 d1jmx2  
d1jmxal d1pbya2 d1r7ha\_ d1faaa\_ d1wika1 d1xfla\_ d1ttza1 d2f51a1  
d1ti3a\_ d1nhoa\_ d1sena\_ d2i4aa\_ d1ep7a\_ d1zmaa1 d1fo5a\_ d3lefa1  
d3diea1 d2yana1 d1z6na1 d1oaza\_ d3zywa1 d4aj8a\_ d1nm3a1 d4fiwa\_  
d1wmja\_ d4hs1a1 d1liloa\_ d1xwaa1 d1wjka1 d2vmla\_ d1fb6a\_ d1gh2a\_  
d1h75a\_ d1nw2a\_ d1kx5b\_ d3a6na\_ d4m6ba2 d2nqbd\_ d3wkjd\_ d2yfwe\_  
d4h9na\_ d5bnxa\_ d1kx5c\_ d3r45a\_ d1eqzb\_ d4jjnb\_ d1f66c\_ d1eqza\_  
d4wnnb\_ d1kx5a\_ d1u35c1 d1id3a\_ d2nqbc\_ d1kx5d\_ d1ku5a\_ d1flea\_  
d2b5ea2 d2b5ea3 d2b5ea1 d2b5ea4 d2kp1a1 d2kp2a1 d1hyua3 d1hyua4  
d1j08a1 d1pd212 d1nhya2 d2a2ra2 d1k0dd2 d1f2ea2 d1gsua2 d1f3ba2  
d2fhea2 d2pvqa1 d1tw9a2 d1oyja2 d1e6ba2 d3ik7a1 d4is0a1 d1r5aa2  
d1jlva2 d1m0ua2 d3gtub2 d1z9ha2 d1okta2 d1axda2 d2gsra2 d1tu7a2  
d1k3ya2 d1zagma1 d1b48a2 d1gnwa2 d1gwca2 d2gsta2 d1glqa2 d1oe8a2  
d1pn9a2 d1v2aa2 d1fw1a2 d1duga2 d3zxha\_ d1cgla\_ d1rm8a\_ d1leaka2  
d1hy7a\_ d2jsda\_ d1cxva\_ d1hv5a\_ d21j7a\_ d2m8bb1 d2kyqa\_ d3psma\_  
d1jkza\_ d1jxca\_ d2g11a\_ d1ugla\_ d4uj0a\_ d1741a\_ d1691a\_ d2o4wa\_  
d1p37a\_ d1k28a3 d1xjta1 d1jtma\_ d2f2qa\_ d4e97a1 d2za0a\_ d2c21a1  
d1f9za\_ d2pjsa1 d1klla\_ d2i7ra1 d1ecsa\_ d1xqaa1 d5cj3a1 d1npba\_  
d1jifa\_ d2p7oa\_ d1r9ca\_ d1nkia\_ d1mpya2 d1kw3b2 d1kw3b1 d4ghga1  
d1tfza1 d3isqa1 d3isqa2 d1sqia1 d1sqia2 d1lkda2 d1lkda1 d1cjxa2

d1cjxa1 d1sp9b2 d1t47a1 d1t47a2 d1flua2 d1sp8a1 d1sp8a2 d1flua1  
d1s5ja2 d1qhta2 d4dlea2 d1tgoa2 d3py8a2 d1q8ia2 d1kfsa2 d2py5a2  
d1d5aa2 d1qsta\_ d2beia1 d4m3sa\_ d1u6ma1 d1ygha\_ d1yk3a1 d3dr6a\_  
d1xmta\_ d1z4ea1 d2ge3a1 d1bo4a\_ d2fiaa1 d2jdca1 d1y9wa1 d3to7a\_  
d1wwza1 d2fl4a1 d2ozua1 d2b5ga\_ d2cy2a1 d2p0wa\_ d1cm0a\_ d4pswa\_  
d1yrea1 d1yr0a1 d1m4ia\_ d2gana1 d1yvka1 d1ghea\_ d2g3aa1 d1y7ra1  
d2euia1 d1q2ya\_ d2fsra1 d1xeba\_ d2ae6a1 d1cjwa\_ d1qsm\_ d2aj6a1  
d1y9ka1 d1i12a\_ d1vkca\_ d2atra1 d1n71a\_ d2d4pa1 d2fiwa1 d2fe7a1  
d1tiqa1 d2ou2a\_ d1yx0a1 d2fcka1 d1p0ha\_ d2j8ma\_ d2pq8a\_ d1z4ra1  
d1s3za1 d1ufha\_ d2nqya\_ d1h4ga\_ d1hixa\_ d1oa2a\_ d1olra\_ d3b7ma\_  
d4h7ma1 d3wp3a\_ d2vgda\_ d1igoa\_ d3zsea\_ d2nlra\_ d3wx5a\_ d1oa3a\_  
d1pvxa\_ d1m4wa\_ d1f5ja\_ d1oa4a\_ d1ks5a\_ d4ixla1 d1xvqa1 d1pn0a2  
d3hy2a\_ d2cvba1 d1o8xa\_ d1lu4a\_ d1we0a1 d2bmx1 d2a4va1 d1psqa\_  
d1xiya1 d1q98a\_ d1n8ja\_ d1zofa1 d2ggta\_ d3tjja\_ d4je1a1 d1o73a\_  
d3s9fa\_ d2zcta\_ d1qmva\_ d1jfua\_ d2b1ka\_ d5dvba1 d2b5xa1 d2v2ga\_  
d1st9a\_ d3tb2a\_ d4llra\_ d4fh8a1 d1e2ya\_ d1knga\_ d2h30a\_ d1i5ga\_  
d2z9sa\_ d2f8aa1 d1tp9a1 d2b7ka\_ d1nm3a2 d3hvva\_ d2wfca1 d4kcea\_  
d1xvwa1 d4gqca1 d3qpma\_ d4k1fa\_ d1zzoa1 d1gpla\_ d1prxa\_ d4od7a1  
d1z6ma1 d4mcua1 d4dvca1 d1r4wa\_ d3l9sa\_ d1un2a\_ d3rppa\_ d1rmka\_  
d1ixta\_ d1eyoa\_ d1cna\_ d1g1pa\_ d1f3ka\_ d1fyga\_ d2m5ta\_ d1cqqa\_  
d1wqsa\_ d5bpea\_ d2ipha\_ d1lvoa\_ d2bhga1 d3tnta\_ d3sjia\_ d3d23a1  
d2fyqa\_ d3tloa\_ d3zvea1 d2hrva\_ d3q3ya1 d4asha1 d1e88a1 d1l6ja5  
d1l6ja4 d1eaka4 d1eaka3 d1l6ja3 d1h8pa2 d1etha2 d1w52x1 d2ppla1  
d1hpla2 d1lpbb2 d2oxea1 d1bu8a2 d1rpla2 d1ys1x\_ d4hs9a\_ d1ex9a\_  
d1ku0a\_ d3qmma\_ d1dy2a\_ d3groa\_ d1pjaa\_ d1thta\_ d1ra6a\_ d1muka\_  
d3gsza\_ d1khva\_ d1te9a\_ d2xwha\_ d3uqsa\_ d3hkwa\_ d3n6ma\_ d2cjqa\_  
d2xyma\_ d1teba\_ d1te8a\_ d1s48a\_ d1u09a1 d4wfxa\_ d3tyqa\_ d2pgga1  
d1xwdc1 d3kj4a\_ d1w8aa\_ d2ifga3 d1p9ag\_ d1xkua\_ d4dv8a2 d2bk7a\_  
d3fjua\_ d1z5ra1 d1kwma1 d1uwya2 d1jqga1 d2c1ca1 d1tda\_ d1h8la2  
d1ohfc\_ d2tbvc\_ d1c8nc\_ d1x36a\_ d1smvc\_ d1ng0c\_ d4sbvc\_ d1lopa\_  
d1f2nc\_ d1cixa\_ d1y29a\_ d1v7fa\_ d2jtba\_ d1d1ha\_ d1g9pa\_ d1lupa\_  
d1qk7a\_ d1mb6a\_ d2a2va\_ d1niya\_ d1i25a\_ d1hvwa\_ d2mpqa\_ d1ie6a\_  
d1la4a\_ d2mxoa1 d1d10a\_ d1koza\_ d1qk6a\_ d1emxa\_ d1lqra\_ d1c6wa\_  
d1js9c\_ d1za7a\_ d1laja\_ d1rypd\_ d1irua\_ d1rypc\_ d3unfk\_ d1rypa\_  
d1j2pa\_ d1irui\_ d1j2qh\_ d3unfh\_ d1m4ya\_ d1rypb\_ d1irul\_ d1irug\_  
d1iru2\_ d1q5rh\_ d1rypg\_ d1g3ka\_ d1iruf\_ d1q5qa\_ d1e94a\_ d1irub\_  
d1ryph\_ d3ty6a\_ d1iruj\_ d1iruk\_ d1rype\_ d1irud\_ d1irue\_ d3mi01\_  
d1rypf\_ d1iruh\_ d2z3ba\_ d1iruc\_ d3mka2\_ d1iru1\_ d1ny721 d1ny722  
d1a6ca3 d1a6ca2 d1a6ca1 d1pgl22 d1pgl11 d1ny711 d1mqta\_ d1d4m3\_  
d1fmd3\_ d2mev1\_ g1aym.1 d1ev13\_ d4q4w1\_ d1r1a3\_ d2x5ia\_ d1rhi1\_  
g1r1a.1 g1d4m.1 g1rhi.1 d1b35b\_ d1lopa\_ d1tme1\_ d4iv1a\_ g1pvc.1  
g1fpn.1 d1fpn1\_ d4gb31\_ d1d4m1\_ d1fmd1\_ d1ev11\_ d2wzr3\_ g1cov.1  
d1qqp3\_ g1fmd.1 d2x5ic\_ d1rhi3\_ g1oop.1 d1hxs1\_ d1fpn3\_ d1bev1\_  
g2mev.1 d1eah3\_ d1aym1\_ d1pvc3\_ d1qqp1\_ d1zba3\_ d1h8ta\_ d3vbhc\_

g1b35.1 g1bev.1 d1hxs3\_ g1ev1.1 d1bev3\_ g1tmf.1 d1tmf1\_ d1b35a\_  
d2mev3\_ gleah.1 g1h8t.1 d1eah1\_ d4q4w3\_ d1rla1\_ d1aym3\_ d1pvc1\_  
d1zba1\_ d1h8tc\_ d1oopc\_ d1tme3\_ g1qqp.1 d4iv1c\_ g1tme.1 d1y14b1  
d2nn6i1 d1i94l\_ d2zjra2 d1smxa\_ d2qamc2 d1hh2p1 d2r7da1 d1rl2a2  
d1wfaq1 d3bzka4 d1x6oa2 d3a0ja\_ d2j01d2 d2ja9a1 d4q15a\_ d1hr0w\_  
d1luza\_ d2n3sa\_ d2vnud1 d1h95a\_ d1go3e1 d2nn6h1 d1ne3a\_ d2mola\_  
d1liz6a2 d1jjga\_ d1e3pa2 d2ix0a3 d2ix0a2 d2lxja\_ d1ueba3 d1ueba2  
d2z0sa1 d1u0la1 d2ix0a1 d2eifa2 d2je6i1 d3i2za1 d2c35b1 d2ahob2  
d1t9ha1 d3i4oa\_ d2qall1 d1jt8a\_ d2nn6g1 d1g6pa\_ d3cama\_ d1i94q\_  
d1c9oa\_ d1d7qa\_ d2ba0a1 d2vnud2 d2vnud3 d1khia2 d2qalq1 d1wi5a1  
d1xtda2 d1ny4a\_ d4w9ta\_ d1jvna1 d4x2ra1 d1ka9f\_ d1qo2a\_ d4axka1  
d1thfd\_ d4u28a\_ d2y88a\_ d4wd0a\_ d1vzwa1 d1eixa\_ d3exra\_ d2ffca1  
d2fdsa1 d3n3ma1 d2czda\_ d2yyua\_ d1vqta1 d1dbta\_ d3ldva1 d4lt9a1  
d3tc7a1 d3hoja\_ d1i4na\_ d3vnda\_ d3n18a1 d1geqa\_ d3nava1 d1v5xa\_  
d4a2ra1 d3tc6a1 d1ujpa\_ d4ijba\_ d1xcfa\_ d1vc4a\_ d1rd5a\_ d1qopa\_  
d3b5va\_ d2r80b\_ d1cqxa1 d1cg5a\_ d1gcvb\_ d3boma\_ d2h8fb\_ d2raoa\_  
d3bj1a\_ d4hrrb\_ d2r50a\_ d3d1kb\_ d2aa1b1 d3zhwa\_ d3hf4b\_ d3gdja\_  
d1jebb\_ d3bj1b\_ d1x9fb\_ d1wmub\_ d1gcvb\_ d3bcqb\_ d3d4xb\_ d1gvha1  
d2dc3a\_ d3hf4a\_ d4yu3a\_ d3k8ba\_ d1qpwb\_ d2r80a\_ d3bcqa\_ d1v4wa\_  
d3wtgb\_ d1j17a\_ d4esaa\_ d1a9we\_ d3d1ab\_ d1fsla\_ d4h21a\_ d1v4wb\_  
d1mwca\_ d1vhba\_ d1jeba\_ d1spgb\_ d1h97a\_ d1q1fa\_ d1tu9a1 d3d1aa\_  
d1hdsb\_ d3hyub\_ d2zfb\_ d3fs4a\_ d1oj6a\_ d1shrb\_ d4h21b\_ d4yu3b\_  
d1spga\_ d3hrwa\_ d3qqra\_ d3at5a\_ d4wchd\_ d3hyua\_ d1cg5b\_ d1uc3a\_  
d1hbra\_ d2raob\_ d1outb\_ d4esab\_ d3gdjb\_ d3qqqa\_ d1x9fc\_ d3vrfb\_  
d1litha\_ d3mkba\_ d3d4xa\_ d3mjpa\_ d1j16a\_ d3fh9a\_ d1outa\_ d2dc3b\_  
d1it2a\_ d3eoka\_ d3g46a\_ d1qpwa\_ d3vrfb\_ d1ch4a\_ d1x9fd\_ d1hdsa\_  
d2zfb\_ d3mkbb\_ d1or4a\_ d3wtga\_ d1a4fa\_ d3fh9b\_ d3bomb\_ d3cy5a\_  
d3at5b\_ d1x9fa\_ d2oifa\_ d4lmb\_ d1cpcb\_ d3v57a\_ d1kn1a\_ d1cpca\_  
d4f0ta\_ d2vjha\_ d4po5b\_ d1eyxa\_ d1alla\_ d4f0tb\_ d1b33b\_ d1b8db\_  
d4h0mb\_ d1b33a\_ d2vjhb\_ d4lm6b\_ d2vmlb\_ d1allb\_ d2vjta\_ d3dbja\_  
d2vmla\_ d2vjtb\_ d4f0ub\_ d1f99b\_ d4rmpa1 d1liaa\_ d1eyxb\_ d2uulb\_  
d4lmsb\_ d4f0ua\_ d2bv8a\_ d1f99a\_ d2bv8b\_ d2c71b\_ d3dbjb\_ d4rmpb1  
d1b8da\_ d4h0ma\_ d3v57b\_ d1kn1b\_ d1liab\_ d2uula\_ d2j96a\_ d1f00i3  
d1azwa\_ d1mtza\_ d1k8qa\_ d2xqfa\_ d1ea5a\_ d1f6wa\_ d1dx4a\_ d1qe3a\_  
d1k4ya\_ d4qwwa\_ d2ha2a\_ d1sfra\_ d1f0na\_ d4qeka\_ d3c8da2 d2pbla1  
d1jjia\_ d1lzl\_ d1jjfa\_ d1gl9b1 d1gkub1 d1jmx4 d1jmx3 d1pbya4  
d1pv8a\_ d1w5qa\_ d2c1ha\_ d1l6sa\_ d1dosa\_ d1gvfa\_ d3qm3a1 d2fjka\_  
d1f74a\_ d3l21a\_ d2e1da\_ d1to3a1 d1w3ia\_ d1sfla\_ d1n7ka\_ d1vcva1  
d4imea\_ d1wa3a\_ d2ocza1 d1f2ja\_ d3m16a\_ d2yxga\_ d1ub3a\_ d3a5fa\_  
d1fbaa\_ d1l6wa\_ d1xfba1 d1wx0a1 d1vpxa1 d1ojxa\_ d1mxsa\_ d2a4aa1  
d1xkya1 d3cq0a1 d3s1xa\_ d1f05a\_ d1fdja\_ d3cpra1 d4d2ja\_ d4mh8a\_  
d1mu2a2 d4i7ga1 d3rp2a\_ g1lucy.1 d1fuja\_ d2zchp\_ d3w94a\_ d1si5h\_  
d1l06a\_ g2pka.1 d1cgha\_ d1kigh\_ d1a5ia\_ d3s9ba\_ d1hj8a\_ d1ao5a\_  
d2anya\_ d1q3xa1 d1gvza\_ d1azza\_ d4gsoa\_ d2f91a1 d1iaua\_ d1gdna\_



d1eufa\_ glfiw.1 d1eq9a\_ d4nfea\_ d2rdla\_ d1spja\_ d1elva1 d1a7sa\_  
d1ekbb\_ d1pfxc\_ d1yc0a\_ d2aiqa\_ glfiz.1 d4k60a\_ d4dgja\_ d1mzaa\_  
d1op0a\_ d3tjva\_ d1pytd\_ d1sgfg\_ glgg6.1 d2eeka\_ glrtf.1 d1a0ja\_  
d3g01a\_ d1pytc\_ d4e7na\_ d1ddja\_ d1z8ga1 d2hlca\_ d1npma\_ d1brup\_  
gljou.1 d1sgfa\_ d1autc\_ g2hnt.1 glkdq.1 dlorfa\_ d3s69a\_ d4crga\_  
d1fxya\_ d1bqya\_ d1svpa\_ d1mbma\_ d3su6a1 d1cula1 d4agka\_ d1vcpa\_  
d1q31a\_ gln11.1 d3e90b\_ d1ep5a\_ d3u1jb\_ d1jx4a2 d3gv5b1 d1t94a2  
d3bq0a2 d4lu0a\_ d3unda1 d3e9aa1 d1vr6a2 d1n8fa\_ d2qkfa\_ d1d9ea\_  
d1o60a\_ d1e69a\_ d1mv5a\_ d3g60a4 gl1i8.1 d1ewqa2 d1ji0a\_ d1qhla\_  
d1v43a3 d2wmfa1 d1vpla\_ d4a82a2 glf2t.1 d2d62a1 d3tuic1 d2bbsa1  
d3g60a3 d2ixea\_ d1g6ha\_ d1sgwa1 d2qi9c\_ d3rlfa1 d3b60a1 d3d31a2  
d2pzea1 glxew.1 d1jj7a\_ d1oxxk2 d2onka1 d1wlwa\_ d1iwea\_ d1qf5a\_  
d1vmaa2 d1nija1 d1np6a\_ d2p67a1 d3ihla\_ d1okkd2 d1l1sa2 d1s1ma2  
d1iona\_ d2v40a\_ d1dj3a\_ d3hida\_ d2vola1 d2g0ta1 d1vcoa2 d1j8mf2  
d1g3qa\_ d1xjca\_ d1p9ba\_ d1qzxa3 d1ihua2 d1ihua1 d2qm8a\_ d1dj2a\_  
d4ioja\_ d1cp2a\_ d1yrba2 d1hyqa\_ d3gqba2 d1skye3 d1xp8a1 d1tf7a2  
d1tf7a1 d1ye8a1 d1skyb3 d2qe7d2 d4blta\_ d4huta\_ d3l1daa2 d4hyya\_  
d2i3ba1 d1cr1a\_ d3j9tb2 d3ntua2 d1vdza1 d2z43a\_ d1e9ra\_ d1nlfa\_  
d3ziaa2 d1n0wa\_ d1g6oa\_ d3ziad2 d3j9ta2 d1pzna2 d3gqbb2 d2i49a\_  
d1nnfa\_ d1xvxa\_ d1ursa\_ d1h3da1 d1iuda\_ d4m1va1 d1twya\_ d3e13x\_  
d2nxoa1 d4pfua\_ d3ttma\_ d1elja\_ d2qmwa1 d1us5a\_ d1y3na1 d1jeta\_  
d1uqwa\_ d4f19a1 d2esna2 d3thia\_ d3fasa1 d2uyeb\_ d2xwva1 d1r9la\_  
d2fyia1 d1pb7a\_ d2ozza1 d1sw5a\_ d1nh8a1 d1vr5a1 d2g29a\_ d1xs5a\_  
d3lswa\_ d2z23a\_ d3w9va\_ d3tcha\_ d1q35a\_ d1z7me1 d3q27a\_ d1p99a\_  
d1ve4a1 d2i6ea1 d4mcoa1 d4n8ya\_ d1eu8a\_ d1zbma1 d1hsla\_ d1lixca2  
d1j1na\_ d1xvya\_ d1y9ua\_ d2z22a1 d1xoca1 d4oera\_ d1wdna\_ d5f1qa1  
d1xt8a1 d1i6aa\_ d4gwoa\_ d4igta1 d1pc3a\_ d4mmpa1 d1o63a\_ d2cz1a1  
d2onsa2 d4mija1 d4ok5a1 d2bmfa1 d2bmfa2 d1yksa1 d1yksa2 d1jr6a\_  
d2qeqa1 d2j1qa1 d1a1va2 d1eh3a\_ d3skpa\_ d1dtza1 d1dtza2 d1ieja\_  
d1jnfa2 d1ce2a1 d1jnfa1 d1b1xa2 d1b1xa1 d1jw1a1 d1jw1a2 d1ryoa\_  
d1h76a1 d1h76a2 d1c4oa1 d2p6ra3 d2p6ra4 d1oywa2 d1oywa3 d1wrba1  
d1w36b2 d1w36b1 d1c4oa2 d3bora\_ d1t6na\_ d2eyqa5 d2eyqa3 d2eyqa2  
d2zu6a2 d1veca\_ d1uaaa1 d1w36d1 d2g9na1 d1z3ix2 d2rb4a\_ d1hv8a1  
d1hv8a2 d1t5ia\_ d1w36c2 d2j0sa2 d2j0sa1 d1fuka\_ d3hjha1 d1z5za1  
d1qdea\_ d1z63a1 d1s2ma2 d1s2ma1 d1wp9a1 d1wp9a2 d1gm5a3 d1gm5a4  
d3dina4 d3dina3 d1q0ua\_ d1w36c1 d1z3ix1 d1nkta3 d1nkta4 d1uaaa2  
d1w36d2 glqhh.1 d2fwra2 d2fwra1 d3q3ma\_ d1za0a1 d2inca\_ d1jk0a\_  
d2incb\_ d1mhyb\_ d3hf1b\_ d1mtyb\_ d1r2fa\_ d2uw1a\_ d1mhyd\_ d3n37a\_  
d1afra\_ d1oquc\_ d1syya\_ d1mtyd\_ d2olza\_ d1uzra\_ d1smsa\_ d2fkza\_  
d1zujal d1s3qa1 d2fjca1 d1z6om1 d1veia\_ d4dyya\_ d1jiga\_ d3gvya\_  
d2pyba\_ d4cy9a1 d3bvfa1 d1r03a\_ d2cf7a\_ d1nf4a\_ d1zs3a1 d4iwka\_  
d3ka8a\_ d3np0x\_ d1n1qa\_ d1l1b3a\_ d4e6ka\_ d1z6oa1 d2fzfa1 d4dyua\_  
d3ge4a\_ d1jgca\_ d4am4a\_ d2z6ma\_ d1ji5a\_ d1vlga\_ d1l1koa1 d1krqa\_  
d3qz3a\_ d1o9ra\_ d2ffxj\_ d1euma\_ d1yv1a1 d2v2pa\_ d1j30a\_ d4di0a\_

d1dpsa\_ d1oewa\_ d2qzxa\_ d2asia\_ d1psoe\_ d1miqa\_ d1smra\_ d2h6ta\_  
d1pfza\_ d1lizda\_ d3hd8a\_ d1j71a\_ d1dpja\_ d4aa9a\_ d1t6ex\_ glb5f.1  
g1lya.1 g1htr.1 d1qdma2 d1bxoa\_ d1wkra\_ d1tzsa\_ d2qzwa\_ d2v76a\_  
d1wj1a1 d1aqca\_ d1qqga1 d1ntva\_ d1n3ha\_ d4dbba\_ d3f0wa1 d1p3ra\_  
d1wgua1 d2cy4a1 d3hqca\_ d1wvha1 d1xr0b1 d1bdqa\_ d3ggta\_ d3ixoa\_  
d1mrxa\_ d2haha\_ d1tw7a\_ d4njsa\_ d1sgua\_ d2p3da\_ d1nsoa\_ d3d3ta\_  
d2rkfa\_ d1c6ya\_ d2rspa\_ d3ogpa\_ d3ekwa\_ d2o4na\_ d2j9ja\_ d1baia\_  
d3ggua\_ d3lzua\_ d4npua\_ d4j55a\_ d2r8na\_ d2fxda\_ d2p3ca\_ d4dqa\_  
d3ttpa\_ d3t3ca\_ d2p3aa\_ d2hc0a\_ d2fdda\_ d3mwsa\_ d1wgda1 d1wggal  
d4q5eb\_ d1wjna1 d1se9a\_ d3n3kb\_ d1wz0a1 d1we6a1 d2m0xa\_ d2gbka\_  
d3rt3b1 d1wh3a1 d1sifa\_ d2ekek2 d4ii2b1 d4hk2a1 d1m94a\_ d1wgha1  
d1ttna1 d1j8ca\_ d1wx8a1 d3v6cb1 d2ma9b\_ d4i6lb1 d1bt0a\_ d2jvca1  
d1iyfa\_ d2k1fa\_ d1wxva1 d1wf9a1 d1t0ya\_ d2io0b2 d1x1ma1 d2gbma\_  
d1zw7a1 d2m17a\_ d1ud7a\_ d1we7a1 d2lwp\_ d2gbja\_ d1wjua1 d1v6ea1  
d1v86a1 d4eewa\_ d1wiaa1 d4icva\_ d4gu2a\_ d1wx7a1 d1wy8a1 d4hka1  
d2faza1 d1v5oa1 d2a13a1 d2cr5a1 d1wj4a1 d1s3sg\_ d3ubra\_ d1qo8a1  
d1d4ca1 d2k3va\_ d1ft5a\_ d1qdba\_ d1m1qa\_ d2j7aa\_ d1h21a\_ d1ogyb\_  
d4fasa\_ d1jnia\_ d1oaha\_ d1sp3a\_ d1yvca1 d1yeza1 d1g66a\_ d5ajha1  
d2ftba\_ d1pmpa\_ d2rcqa1 d1fdqa\_ d4lkpa\_ d1sa8a\_ d1vyfa\_ d1lpja\_  
d3vg7a1 d4azqa1 d1o8va\_ d5bvqa\_ d1p6pa\_ d2qo4a\_ d1opba\_ d1yiva1  
d1o1va\_ d4bvma1 d4tkba\_ d4i3ba\_ d1bwya\_ d1ggla\_ d4gkca\_ d1cbia\_  
d3p6da1 d1kqwa\_ d2a0aa1 g1y43.1 d1um8a\_ d1ixza\_ d1qvra2 d1qvra3  
d1qzma\_ d1sxjc2 d1jr3d2 d2p65a\_ d1l8qa2 d1g8pa\_ d3hu3a3 d1sxjd2  
d1njfa\_ d1in4a2 d1sxja2 d1tuea1 d2ce7a2 d1w5sa2 d1sxjb2 d1d2na\_  
d1ny5a2 d2gnoa2 d2a5yb3 d1fnna2 d1u0ja1 d1lv7a\_ d1iqpa2 d2fnaa2  
d1ixsb2 d4gita\_ d1sxje2 d1g41a\_ d2e3fa\_ d1mm0a\_ d2e3ea\_ d2llda\_  
d2ny8x\_ d2e3ga\_ d2ny9x\_ d2nz3a\_ d3ia2a\_ d4dgqa1 d1hkha\_ d1zoia\_  
d2k4ua\_ d1hp2a\_ d2lu9a\_ d1baha\_ d2meoa1 d1wm7a\_ d1hlya\_ d1n8ma\_  
d1jlza\_ d1wpda\_ d1c55a\_ d1pvza\_ d1wt7a\_ d1rjia\_ d1wz5a\_ d1m2sa\_  
d1pjva\_ d1c49a\_ d1qkya\_ d2ktca1 d1wmta\_ d1du9a\_ d1j5ja\_ d1rlga\_  
d1t0za\_ d2i61a\_ d1t1ta\_ d1sn4a\_ d1kv0a\_ d2lkba\_ d1npia\_ d1wwna\_  
d1pe4a\_ d2kbka\_ d2li7a\_ d1djta\_ d2kbha\_ d1dq7a\_ d1sega\_ d1omya\_  
d1zywa1 d1jzaa\_ d2jcqa\_ d1n9wa1 d1bbua1 d1e1oa1 d1c0aa1 d1l0wa1  
d3a74a1 d1eova1 d1t61c1 d1iyjb4 d1iyjb5 d1iyjb3 d1o7ia\_ d4ipca1  
d1x3ea\_ d4apva\_ d1jb7a1 d1jb7a2 d1jb7a3 d3kdfa\_ d1ue1b\_ d1wjja1  
d3eiva\_ d1xjva2 d1xjva1 d2ccza2 d1se8a\_ d1lloc\_ d1jb7b\_ d1qvca\_  
d3ulla\_ d1qzga\_ d1miua4 d1miua5 d1miua3 d3g48a1 d1gd7a\_ d1mkha\_  
d1jjcb3 d1pyba\_ d3ubub\_ d1legia\_ d1qo3c\_ d1v7pa\_ d1tdqb\_ d3ubua\_  
d1c3ab\_ d1h8ua\_ d3bx4b\_ d1t8ca1 d1sb2a1 d1qdda\_ d2ziba1 d3cada\_  
d1byfa\_ d1j34b\_ d1jwia\_ d1jzna\_ d1c3aa\_ d1oz7b\_ d1wmza\_ d3bdwb\_  
d1hq8a\_ d1fifa1 d1dv8a\_ d3hupa\_ d1wk1a1 d1umra\_ d2afpa\_ d3bx4a\_  
d1gz2a\_ d1sl6a\_ d1v7pb\_ d3g8ka\_ d1ixxa\_ d1j34a\_ d1jwib\_ d1g1sa1  
d1y17a1 d1ja3a\_ d1fvub\_ d3bdwa\_ d1sb2b1 d1fvua\_ d1oz7a\_ d4m17a\_  
d3cfwa1 d1ypqa1 d1g1ta1 d3fd4a\_ d3l9jc\_ d4dn8a1 d1v4lb\_ d1rdl1\_

d2msba\_ d1dgsa2 d1fvia1 d1ckma1 d1x9na2 d2a1ka\_ d1je5a\_ d1rpma\_  
d2shpa1 d1yfoa\_ d1l8ka\_ d2ooqa1 d1g4us2 d1lara2 d1lara1 d1wcha\_  
d2fh7a2 d2fh7a1 d1ohea2 d2f4da\_ d1rxda\_ d2hxpa\_ d1xria\_ d1d5ra2  
d1fpza\_ d3ezza\_ d4y2ea\_ d1i9sa\_ d3azya\_ d3wvja\_ d1upsa1 d1ajoa\_  
d2hyka\_ d1ajka\_ d2vy0a\_ d1o4ya\_ d3o5sa\_ d3d6ea\_ d3atga\_ d1dypa\_  
d1umza\_ d3i4ia\_ d1c1la\_ d4lbqa\_ d1slta\_ d4no4a\_ d3zsja\_ d3duia\_  
d1g86a\_ d1is3a\_ d1qmja\_ d1hlca\_ d1tdha3 d1q3ba3 d1k82a3 g1qmo.1  
g1len.1 d3zyra\_ d1fnua\_ d1n47a\_ g2ltn.1 d1avba\_ d3usua\_ d1dhkb\_  
d1f9ka\_ d1lukga\_ d1g8wa\_ d1g9fa\_ d3wcsa\_ d1g7ya\_ g1loe.1 d1mvqa\_  
d1hq1a\_ d1v6ia\_ d1dbna\_ d1qnwa\_ d1fx5a\_ d4l8qa\_ d1ioaa\_ d3n35a\_  
d1epwa1 d3h33a\_ d1rwja\_ d19hca\_ d1os6a\_ d3bxua\_ d3h4na\_ d1i77a\_  
d3caoa\_ d1j0pa\_ d2ctha\_ d1ofwa\_ d2e84a\_ d1hh5a\_ d1gyoa\_ d3h34a\_  
d1dszb\_ d1a6ya\_ d3cbba\_ d1ynwa1 d1r4ia\_ d1hcqa\_ d2hana\_ d2hanb\_  
d2enva1 d1kb4b\_ d2n11b\_ d1l01a\_ d1cita\_ d2dara2 d2dara1 d1wyha2  
d2dloa2 d1rutx4 d1rutx3 d2cuqa2 d1x41a2 d1x41a1 d1x3ha2 d1x3ha1  
d2d8za1 d1x61a2 d1x6aa1 d1x6aa2 d2cora2 d2cora1 d1v6ga1 d1v6ga2  
d2d8za2 d1x64a1 d1x64a2 d1b8ta1 d2co8a1 d1x63a2 d2dj7a2 d2dj7a1  
d2cu8a2 d2cu8a1 d1g47a2 d1g47a1 d1wyha1 d2dloa1 d1wiga1 d1wiga2  
d2cupa2 d2cupa3 d1x68a1 d2d8ya2 d2d8ya1 d1m3va2 d1x62a1 d1x68a2  
d1x61a1 d1b8ta3 d1b8ta2 d2d8xa2 d2d8xa1 d1x4ka1 d1x4ka2 d2cuqa1  
d1m3va1 d2co8a2 d1j2oa2 d1x63a1 d2cura1 d2cura2 d1x62a2 d2aq2b1  
d1ck1a1 d1enfa1 d1i4pa1 d1v1oa1 d1et9a1 d1esfa1 d2g9hd1 d4ohja1  
d1klud1 d1eu3a1 d1ty0a1 d1fnua1 d1c4qa\_ d2wv6d\_ d1prtf\_ d1ltrd\_  
d4l63b1 d1r4pb\_ d1prtd\_ d1t10f\_ d2bosa\_ d1prtb1 d3chbd\_

**Family-18 (b.1.1.2)**

**Positive dataset contains 31 protein sequences.**

d1zs8a1 d2vola1 d2vola2 d3qq4b1 d4odh12 d3l9ra2 d3jtth1 d2fath2  
d4elkb2 d2xfxb\_ d4k71b2 d4lfhg2 d2nw2a2 d3huja2 d2nnab1 d3mffb2  
d4rfeb2 d2bc4a2 d2xwtb2 d1ypzf2 d4f7ea2 d1vgka1 d4j12a2 d4x99b2  
d1u58a1 d2bc4b2 d3wn5b1 d1zvsal d1ydpal d1u8ib2 d1ypze2

**Negative dataset contains 3194 protein sequences.**

d1m32a\_ d1libja\_ d1c7na\_ d1iuga\_ d4q75a\_ d2bkwa1 d1t3ia\_ d1n8pa\_  
d1qz9a\_ d1j9a\_ d1p3wa\_ d3kgwa\_ d1c1la\_ d2ctza1 d1vjoa\_ d2rfva\_  
d1gc0a\_ d1cs1a\_ d1d2fa\_ d2ch1a1 d1qgna\_ d1pffa\_ d1elua\_ d1c7ga\_  
d2v1pa1 d2ez1a\_ d1u08a\_ d1l1c5a\_ d1b5pa\_ d1bw0a\_ d3pd6a\_ d7aata\_  
d2csta\_ d1j32a\_ d1fg7a\_ d4wlha\_ d1o4sa\_ d1v2da\_ d1gdea\_ d1m6sa\_  
d1v72a1 d1svva\_ d1ajsa\_ d1wsta1 d2f8ja2 d1l1k9a\_ d1vp4a1 d1xi9a1  
d2gb3a1 d1yaaa\_ d3i2ka1 d1lnsa3 d1mpxa2 d1xkta1 d2hfka\_ d5d3ka\_  
d2cfba1 d1dfoa\_ d1o69a\_ d1bj4a\_ d3k28a\_ d2bwpa\_ d3lg0a\_ d2fnua\_  
d3ou5a\_ d1z7da1 d1b9ha\_ d1iaya\_ d4msoa\_ d1bs0a\_ d1s0aa\_ d1sffa\_  
d3tqxa\_ d1mdoa\_ d3qboa\_ d3pgya\_ d1bjna\_ d2dkja\_ d1ejia\_ d1vefa1  
d4wxga\_ d3bs8a\_ d3gbxa1 d1w23a\_ d1e57b\_ d1auyb\_ d1qnia1 d1fwxa1  
d1f56a\_ d1bypa\_ d1azca\_ d1ws8a\_ d3u25a\_ d1cuoa\_ d1lid2a\_ d1rkra\_  
d2iaac\_ d4dp1x\_ d1nwpa\_ d2gima\_ d2i7sa\_ d1qhqa\_ d3ehbb1 d1fftb1

d1gyca3 d1hfua2 d1kbva1 d1kbva2 d1sdda1 d1sdda2 d1gyca1 d1gyca2  
d1mzya1 d2bw4a1 d1aoza1 d1aoza3 d1aoza2 d1kyaa2 d1kyaa3 d1kyaa1  
d1mzya2 d4e9sa1 d1sddb1 d1sddb2 d1hfua1 d1hfua3 d1oela2 d1oela1  
d1v10a2 d1v10a3 d1v10a1 d2bema\_ d1pama1 d1ea9c1 d1qhoa1 d2fhfa2  
d2fhfa1 d1k3ia1 d1j0ha1 d1cxl1a1 d2bhua1 d1edqa1 d1flsa2 d1ut9a2  
d1gvia1 d1txka1 d4alac\_ d1rera1 d1s6na\_ d3uzqb\_ d2phla2 d2phla1  
d1fxza2 d1lrha\_ d1uija1 g1dgw.1 d2v09a\_ d1uika2 d1uika1 d1dgwa\_  
d1lep0a\_ d2pa7a1 d1wlta1 d1nxma\_ d2c0za1 d1nepa\_ d1ktja\_ d1ds6b\_  
d1fstb\_ d1p8ba\_ d1tafa\_ d1bh9b\_ d1tafb\_ d1jfib\_ d1q9ca\_ d1h3ob\_  
d2byka1 d1n1ja\_ d4g92b\_ d1jfia\_ d1h3oa\_ d2bykb1 d1n1jb\_ d1eixa\_  
d3exra\_ d2ffca1 d2fdsa1 d3n3ma1 d2czda\_ d1q6oa\_ d2yyua\_ d1vqta1  
d1dbta\_ d3ldva1 d2bjca1 d2hsga1 d1qpza1 d1efaa1 d1r0ka3 d1j5pa3  
d1vkoa2 d1vm6a2 d3qvsa2 d1gr0a2 d1p1ja2 d2ovga\_ d1sq8a\_ d1rzsa\_  
d3kz3a\_ d3orca\_ d3gpdg2 d2q49a2 d1hdgo2 d2g17a2 d2cvoa2 d2czca1  
d3pwka2 d1obfo2 d1i32a2 d1zyao2 d2pkqo2 d1b7go2 d2hjsa2 d1cf2o2  
d1vkna2 d1nvmb2 d2m9wa1 d3dfxa\_ d2msya\_ d2djoa1 d2r5za\_ d1au7a1  
d1f43a\_ d2lmda1 d1akhb\_ d1s7ea1 d3nara\_ d1zq3p1 d2craa1 d1mija\_  
d4uuta\_ d3a01a\_ d1x58a1 d3rkqa1 d3cmya1 d2cqa1 d2da6a1 d1e3oc1  
d1fjla\_ d1mh3a1 d1ig7a\_ d1x41a1 d1wh7a1 d1gt0c1 d2mw8a\_ d1lfup\_  
d1x2ma1 d1b72a\_ d1wi3a1 d1jgga\_ d1wjha1 d1x2na1 d1mnmc\_ d2cuea1  
d3k2aa\_ d2hosa\_ d2jwta2 d1pufa\_ d1ooc1 d2hi3a\_ d1b8ia\_ d4j19a\_  
d3lnqa\_ d1wh5a1 d1b8ib\_ d2cqra1 d1guua\_ d1ug2a1 d2cqqa1 d2ajea1  
d4a69c\_ d1h8ac1 d2crga1 d2iw5b1 d1xc5a1 d1ofcx1 d2cu7a1 d1wgxa1  
d2cjj1a1 d2ckxa1 d1gvda\_ d6paxa1 d1k78a1 d1k78a2 d1xg1a1 d1hlva1  
d1iufa2 d1iufa1 d2iu5a1 d1zk8a1 d2g7sa1 d2fd5a1 d2np5a1 d1z0xa1  
d2id6a1 d2d6ya1 d2i10a1 d1vi0a1 d2oi8a1 d3c07a1 d2ns7a1 d2fq4a1  
d2yvea1 d1t33a1 d2o7ta1 d2np3b1 d2g7ga1 d2gena1 d2fbqa1 d2g7la1  
d2gfna1 d2g3ba1 d2jj7a1 d2hyja1 d1sgma1 d1ui5a1 d2hkua1 d2id3a1  
d4jyka1 d3lv8a\_ d1s3ga1 d1zaka1 d1s4qa\_ d3tvta2 d1uf9a\_ d1khta\_  
d1ckea\_ d1osna\_ d1p5zb\_ d4tmka\_ d3cm0a\_ d1jaga\_ d3h86a\_ d1t0hb\_  
d1nn5a\_ d2h92a\_ d3kb2a1 d2c95a1 d1yj5a2 d1kgda\_ d1ly1a\_ d2ak3a1  
d1vyva2 d1deka\_ d2grja1 d1p3ja1 d1y63a\_ d1e4ya1 d1s96a\_ d3iija1  
d1lvga\_ d1nksa\_ d1vyua2 d4e22a\_ d1qf9a\_ d1jjva\_ d1q3ta\_ d1ki9a\_  
d1lw7a2 d1teva\_ d1kjwa2 d1gsia\_ d2iyva2 d1kaga\_ d1viaa\_ d1e6ca\_  
d1x6va3 d1g3ma\_ d1j99a\_ d1t8ta1 d1nsta\_ d1zrha\_ d1ls6a\_ d2a3ra\_  
d1aqua\_ d2zptx\_ d3ckla\_ d1texa\_ d1q44a\_ d2gwha\_ d1odfa\_ d1uj2a\_  
d4gi7a\_ d2jeoa1 d1z0ja1 d3umra2 d3gj0a1 d2gaoa1 d1yzga1 d1x3sa1  
d1g7sa4 d1puja\_ d1udxa2 d1kk1a3 d2o52a\_ d1jwyb\_ d1zcaa2 d1zcba2  
d2fv8a1 d2cjwa\_ d3dz8a1 d1xzpa2 d1vg8a\_ d4qxaa\_ d2ew1a1 d1x1ra1  
d2bcgy\_ d3doea1 d3cona\_ d3reg\_a\_ d3wyga\_ d1upta\_ d2b6ha1 d1zd9a1  
d1lnza2 d1r5ba3 d1n0ua2 d1r2qa\_ d2f9la1 d2rhda\_ d3q3jb\_ d3q85a\_  
d1efma1 d1r8qa\_ d2gf9a1 d2akab1 d1ek0a\_ d1z08a1 d2gcoa1 d2dy1a2  
d4g01b\_ d2cxxa1 d1svia\_ d3q72a\_ d1ni3a1 d4ac9a4 d2erxa1 d2bmea\_  
d1wxqa1 d2gf0a1 d4ldja1 d1zunb3 d1d5ca\_ d4lv5b\_ d1efca3 d1kmqa\_

d2g6ba1 d3lrpa\_ d1tada2 d2y8ea\_ d4rd4a1 d1z06a1 d2heia\_ d3a58b\_  
d1u0la2 d1d2ea3 d1zj6a1 d2ocba\_ d3rwoa\_ d1mr3f\_ d2e9sa1 d4u5xa1  
d2iwra\_ d2fn4a1 d3bwdd\_ d2nzja1 d2atva1 d2ksqa\_ d3l43a\_ d1mkya2  
d1mkya1 d1wmsa\_ d1jn3a3 d2rmka\_ d1f60a3 d1gota2 d1jala1 d2fh5b1  
d1g16a\_ d2wblc\_ d1m7ba\_ d1wf3a1 d1f5na2 d1t9ha2 d1z6xa1 d1z0aa1  
d2fg5a1 d2a5ja1 d2bcjq2 d1s0ua3 d1ky3a\_ d4y0va\_ d4lhwa\_ d2qmea1  
d2atxa1 d1egaa1 d1ryha\_ d1moza\_ d1nrjb\_ d2erya1 d3bfka\_ d1puia\_  
d1fzqa\_ d3j3az1 d3t5ga\_ d1shza2 d3defa\_ d2f7sa1 d3raba\_ d3tsoa\_  
d3aq4a\_ d2a17a1 d3sfva1 d3bc1a\_ d2ncda\_ d1sdma\_ d3h4sa1 d2heha\_  
d2grya\_ g3kin.1 d1kk8a2 d1br2a2 d1goja\_ d1f9va\_ d2mysa2 d1lkxa\_  
d3t0qa\_ d4db1a1 d3gbja\_ d1ry6a\_ d1v8ka\_ d1vava\_ d1luaia\_ d1k8ka2  
d1k8ka1 d3uleb1 d3i33a2 d3i33a1 d1bupa1 d1dkgd2 d1dkgd1 d4ci6a2  
d1jcfal d4a2ba2 d2fxua1 d1yaga2 d1yaga1 d4cbua2 d1g99a1 d2elza2  
d2elza1 d1saza1 d1saza2 d1ig8a1 d1czan2 d1czan3 d1czan1 d1czan4  
d1bg3a4 d1bg3a3 d1bg3a2 d1bg3a1 d1nira1 d1qksa1 d1hroa\_ d4gedb\_  
d3zooa\_ d1mz4a\_ d1gu2a\_ d1f1fa\_ d1dvva\_ d1c6ra\_ d1c75a\_ d1e29a\_  
d1gdva\_ d1cnoa\_ d1h32b\_ d1co6a\_ d2bh4x\_ d2aiua\_ d5cytr\_ d1jdl\_ a\_  
d1i8oa\_ d2zboa\_ d3dmia\_ d1ls9a\_ d1wvec\_ d2yk3a\_ d3ph2b\_ d1dw0a\_  
d5aura\_ d1ql3a\_ d1qn2a\_ d1f1ca\_ d4zzva\_ d2xspa\_ d1leg1a\_ d4v20a\_  
d1ojja\_ d4ipma1 d4csia\_ d3pfza\_ d3ovwa\_ d2yoka\_ d2nqya\_ d1h4ga\_  
d1hixa\_ d1oa2a\_ d1olra\_ d3b7ma\_ d4h7ma1 d3wp3a\_ d2vgda\_ d3zsea\_  
d2nlra\_ d3wx5a\_ d1oa3a\_ d1pvxa\_ d1m4wa\_ d1f5ja\_ d1oa4a\_ d1ks5a\_  
d4ixla1 d1evsa\_ d1cnt1\_ d1pvhb\_ d1z7ca\_ d1huwa\_ d1bgea\_ d1rhga\_  
d1f45b\_ d1ilrb\_ d1axia\_ d1etea\_ d3tgxb\_ d1scfa\_ d2z3qa1 d3qb1a\_  
d1hula\_ d1m48a\_ d4nkqb\_ d1eera\_ d1v7mv\_ d5e4ea\_ d2o27a\_ d3b5ka\_  
d2psma1 d4zf7a\_ d3uf5a\_ d4x51a\_ d1d9ca\_ d4ypgc1 d3oq3a\_ d1lqsl\_  
d1n1fa\_ d1au1a\_ d1wu3i\_ d3bes1\_ d3ux9a\_ d2ejca\_ d3muea1 d1lihoa\_  
d3q12a1 d3rbaa\_ d2qtra\_ d1nupa\_ d3l92a\_ d1f9aa\_ d1qjca\_ d2h29a\_  
d1vlha\_ d1od6a\_ d1lw7a1 d4ruka\_ d2el7a\_ d1iq0a2 d1irxa2 d1r6ta2  
d1ivsa4 d2cyba\_ d1rqga2 d1j09a2 d2yxna\_ d1h3fa1 d1ffya3 d2g36a1  
d1nzja\_ d1jila\_ d1n3la\_ d1i6la\_ d1pfva2 d1h3na3 d3n9ia\_ d3sz3a1  
d3sw2a\_ d1moxc\_ d1dx5i3 d1edmb\_ d1aut12 d1aut11 d1nqlb\_ d1dva11  
d1szba2 d1kigl\_ d2y5f1\_ d1ijqa2 d1gk5a\_ d1g1sa2 d1nt0a3 d1xdtr\_  
d1lmja2 d1lmja1 d1nzia2 d2wphe\_ d1pfx12 d1pfx11 d1p9ja\_ d1g1ta2  
d1f7ea\_ d4yzub\_ d1qx2a\_ d2y5ia\_ d1qlsa\_ d1psra\_ d3n22a\_ d2egda\_  
d4ggfc\_ d2wcea\_ d2luca\_ d4aqia\_ d3nsia\_ d2lp3a\_ d1j55a\_ d1a4pa\_  
d1k8ua\_ d1pvaa\_ d3fs7a\_ d1ttxa\_ d1rwy\_ a\_ d2kyfa\_ d1rk9a\_ d1a75a\_  
d1lexra\_ d1tiza1 d1nyaa\_ d1g8ia\_ d1ggwa\_ d1wdcc\_ d3fwba\_ d1ggza\_  
d2o5ga\_ d1ctaa\_ d1m45a\_ d3i5gc\_ d1sl8a\_ d1fpwa\_ d2scpa\_ d2roaa\_  
d4aqra\_ d3pn7b\_ d1br1b\_ d2mysb\_ d1s6ca\_ d1bjfa\_ d2obha\_ d1jfka\_  
d1j0a\_ d1qv0a\_ d1lkja\_ d2mlfc\_ d2m97a\_ d2d8na\_ d4by5a\_ d1jbaa\_  
d4nqga\_ d1wdcb\_ d2mysc\_ d1j7qa\_ d1s6ia\_ d1uhka2 d1r2ua\_ d1dtla\_  
d3kf9a\_ d3pn7c\_ d1qjta\_ d1fi6a\_ d5d67d\_ d1tuza\_ d1h8ba\_ d1leg3a2  
d2zkmx1 d1snla\_ d1gjya\_ d1y1xa\_ d1dvia\_ d1df0a1 d1qxp\_ a2 d4usla\_

d1k94a\_ d1sfsa\_ d1jfxa\_ d1wkya2 d1uuqa\_ d3wh9a\_ d4mlra\_ d1xyza\_  
d4xuya\_ d2je8a5 d4bf7a1 d3cuia\_ d1ur4a\_ d1odza\_ d2vzsa5 d1bqca\_  
d2x2ya1 d1hjqa\_ d1qnra\_ d4y7ea1 d1vjza\_ d4k68a\_ d2v3ga\_ d4hpga\_  
d1nofa2 d1nq6a\_ d1h4pa\_ d1aq0a\_ d3ziza\_ d4bs0a\_ d1ecea\_ d1h1na\_  
d1ta3b\_ d1w91a2 d1ilwa\_ d1uhva2 d1us3a2 d1egza\_ d7a3ha\_ d1tvna1  
d3nyda1 d1ghsa\_ d2cyga1 d4xv0a\_ d2c8na2 d1w32a\_ d3emca\_ d1v6ya1  
d1foba\_ d2uwfa1 d2fgla\_ d3niya1 d2c0ha1 d1rh9a1 d1yq2a5 d1szna2  
d1fa2a\_ d1pama4 d5do8a1 d1ea9c3 d1hx0a2 d2fhfa5 d1qhoa4 d1avaa2  
d1m53a2 d4m8ua1 d2gjpa2 d1lwha2 d4howa1 d1ktba2 d1j0ha3 d3vm5a1  
d2x1ia\_ d1wzaa2 d1uasa2 d2diea1 d1mxga2 d1ht6a2 d1eswa\_ d1liv8a2  
d5cpsa\_ d1ud2a2 d1zjaa1 d3gbea1 d1kwga2 d1wdpa\_ d1gcya2 d1g5aa2  
d1hvxa2 d3dhp2 d2bhua3 d4do4a1 d3qgva1 d1e43a2 d1g94a2 d2d3na2  
d1gjwa2 d1gvia3 d1x1na1 d1r7aa2 d1tz7a1 d4c7ga2 d2gjxa1 d1nowa1  
d1jaka1 d1yhta1 d4toqa\_ d1wb0a1 d1w9pa1 d1eoka\_ d1itxa1 d1kfwa1  
d1goia2 d1edqa2 d2gsja\_ d1hjxa1 d1jnda1 d1vf8a1 d3wdpp1 d3wq5a\_  
d1gnxa\_ d4gxpa\_ d4hz8a\_ d1e4mm\_ d3aiua\_ d1wcga1 d1qvba\_ d3ahxa\_  
d1v02a\_ d2dgaa\_ d1pbga\_ d1vffa1 d1qoxa\_ d4ha4a\_ d1t77a2 d1mixa2  
d1e5wa2 d1j19a2 d1isna2 d2a16b2 d3syxa1 d1mkea1 d2p8va\_ d1xoda1  
d1i7aa\_ d1evha\_ d1qc6a\_ d1legxa\_ d1iuka\_ d2csua1 d3q9ub\_ d2yv1a1  
d3q9na\_ d2d59a\_ d2yv2a1 d1euca1 d1y81a1 d1wgqa1 d1v89a1 d2coda1  
d1zc3b\_ d1wg7a1 d1u5ea1 d1v61a1 d2coca1 d2ys1a1 d1v5pa1 d1ntya2  
d1wjma1 d1wila1 d1u29a\_ d1xx0a1 d1unqa\_ d2zkmx3 d1fhoa\_ d1v88a1  
d2adza1 d1x1fa1 d1p6sa\_ d2coaa1 d1btka\_ d1v5ma1 d1faoa\_ d2x18a\_  
d1dyna\_ d1x1ga1 d4kaxb\_ d2j59m1 d1kilb2 d1xcga2 d1txda2 d1u5da1  
d1dbha2 d1wlha\_ d1upqa\_ d1v5ua1 d1foea2 d2fjla1 d1eaza\_ d2dfka2  
d2cofa1 d1kz7a2 d91dta1 d2ewda3 d1up7a1 d2dfda1 d1s6ya1 d1vjta1  
d7mdha1 d1hyea1 d1t2da1 d1ojsa3 d1b8pa1 d1ldna1 d1hyha1 d1civa1  
d2a92a1 d1ez4a1 d1i0za1 d1y6ja1 d1gv0a1 d1ur5a1 d1llda1 d1v8ba1  
d1gdha1 d1l7da1 d1mx3a1 d1ygya1 d1qp8a1 d1li4a1 d1j4aa1 d2naca1  
d1npya1 d3t4ea2 d1a4ia1 d1o0sa1 d2hk9a2 d2egga2 d1b26a1 d1bvua1  
d1gq2a1 d1c1da1 d1leha1 d1gtma1 d1leuza1 d1nvtal d3dona2 d1ledza1  
d1gpja2 d1p77a1 d1nyta1 d1b0aa1 d1v16a1 d1v91a1 d1txga2 d3f47a1  
d2pv7a2 d1xc2a3 d2ahra2 d4xiya1 d2f1ka2 d1pgja2 d1i36a2 d1np3a2  
d1lj8a4 d1teaa3 d1qmg2 d2i76a2 d2g5ca2 d1wdka3 d1dlja2 d3cuma3  
d1kola2 d1f8fa2 d1qora2 d1jqba2 d1vj0a2 d1cdoa2 d1gu7a2 d1d1ta2  
d1xa0a2 d2dm6a2 d1jvba2 d1rjwa2 d1llua2 d1h2ba2 d1tt7a2 d1piwa2  
d1o89a2 d1iz0a2 d1e3ja2 d1yb5a2 d1uufa2 d1vj1a2 d1e3ia2 d3gpdg1  
d1vc2a1 d2nvwa1 d1u8fo1 d1ydwa1 d1hdgo1 d2g17a1 d1cf2o1 d2czca2  
d1r0ka2 d1obfo1 d2cvoa1 d1ebfa1 d1h6da1 d1i32a1 d1zh8a1 d2q49a1  
d1qkia1 d1j5pa4 d3pzra1 d1xeea1 d1vkoa1 d1vm6a3 d3qvsa1 d2pkqo1  
d1b7go1 d1gr0a1 d1p1ja1 d1lc0a1 d1j0xo1 d3pwka1 d2hjsa1 d1zyao1  
d1vkna1 d1tlta1 d1nvmb1 d3sjua\_ d3ojfa1 d1xu9a1 d2jjya1 d1n7ha\_  
d1y1pa1 d1h5qa\_ d1jtvva\_ d4fs3a\_ d2bkaa1 d1gy8a\_ d2c5aa1 d1ulsa\_  
d1ooea\_ d2b69a1 d1y5ma1 d1spxa\_ d1aela\_ d1bxka\_ d1ydea1 d1gega\_

d1hdoa\_ d1o5ia\_ d1e6ua\_ d1snya1 d2rhca\_ d3zv4a\_ d5ceja\_ d2d1ya1  
d1fjha\_ d3w8ea\_ d2fmua1 d1x1ta\_ d1rpna\_ d3ay7a1 d1k2wa\_ d1eq2a\_  
d2hrba1 d3ruaa\_ d2ew8a1 d4hwka\_ d1xgka\_ d2bd0a1 d1yo6a1 d2a35a1  
d2ntva\_ d1vl8a\_ d1hdca\_ d4bkua\_ d2ag5a1 d2q45a\_ d1nffa\_ d4iy1a\_  
d1zbqa1 d1kewa\_ d1ek6a\_ d1ja9a\_ d2q46a2 d1iy8a\_ d1cyda\_ d2ptga\_  
d1hxha\_ d1uzma1 d31yla\_ d4m89a\_ d3wyea\_ d2b11a1 d1w6ua\_ d1sb8a\_  
d2q2va\_ d4nr0a\_ d1e6wa\_ d2gasa\_ d3oiga1 d2bgka1 d1mxha\_ d1vl0a1  
d1rkxa\_ d1r6da\_ d1wmaa1 d1e7wa\_ d2c07a1 d1xkqa\_ d3tzha\_ d1g0oa\_  
d31z6a\_ d1qyca\_ d1ledoa\_ d1gz6a\_ d1oc2a\_ d1t2aa\_ d1zema1 d2xoxa\_  
d1z45a2 d1geea\_ d1p33a\_ d31t0a\_ d4e6pa\_ d2wyua\_ d1db3a\_ d4q9na\_  
d1xhla\_ d4o1ma\_ d1fmca\_ d2uvda\_ d2gdza1 d1uaya\_ d2z1ma\_ d2o23a2  
d2fr1a2 d2fr1a1 d1qsga\_ d1qyda\_ d4zjua\_ d2a4ka1 d1yb1a\_ d1wvga1  
d1yxma1 d3f4ba\_ d1mg5a\_ d1xg5a1 d1r55a1 d3gboa\_ d1atla\_ d1kufa\_  
d1buda\_ d4q11a\_ d1quaa\_ d1yp1a\_ d1wnia\_ d1cmxa\_ d1xd3a\_ d3ifwa\_  
d1e2ta\_ d4c5pa\_ d2bsza1 d4bgfa\_ d1w4ta1 d1g0da4 d2f4ma1 d1x3za\_  
d3ioqa\_ d1fh0a\_ d1o0ea\_ d1khqa\_ d1m6da\_ d2cb5a\_ g8pch.1 d1s4va\_  
d2pnsa\_ d1vsna1 d1mira\_ d1iwda\_ d2oula\_ d7pcka\_ d3bwka\_ d3bcna\_  
d2p86a\_ d1pvja\_ d1pcia\_ d1gece\_ d1deua\_ d4bs6a\_ d1xkga1 d1cqda\_  
d1jqpa2 d2c0ya\_ d2bdza\_ d3p5ua\_ d1zoya1 d1qo8a2 d1d4ca2 d1jnra2  
d1kf6a2 d2jk6a2 d2jk6a1 d1feca1 d1feca2 d1lpfa1 d1lpfa2 d1xhca1  
d1xhca2 d1dx1a2 d1dx1a1 d1gera2 d1m6ia2 d1onfa1 d1onfa2 d3lada2  
d3lada1 d1w4xa1 d1w4xa2 d1gesa2 d1mo9a1 d1xdia1 d1fl2a2 d1fl2a1  
d1fcda1 d1fcda2 d1h6va2 d1h6va1 d1mo9a2 d1gv4a2 d1gv4a1 d2gv8a2  
d2gv8a1 d1aoga1 d1aoga2 d1hyua1 d1ebda1 d1ebda2 d3dk9a1 d1q1ra2  
d1q1ra1 d1gesa1 d1zbfal d2z1ha\_ d2etja1 d3qioa1 d1j11a\_ d2e41a\_  
d1j12a\_ d21sna1 d1io2a\_ d1uaxa\_ d2yv0x\_ d1mu2a1 d1lekea\_ d1i39a\_  
d1pn0a1 d1reoal d1ju2a1 d2f5va1 d3c96a1 d2gmha1 d1pj5a2 d1gpea1  
d1o5wa1 d1n4wa1 d2dw4a2 d2ivda1 d1seza1 d2voua1 d1kdga1 d1s5ja1  
d2hbja2 d2igia\_ d1wlja\_ d1qhta1 d4dlea1 d1tgoa1 d2f96a1 d3tr8a1  
d3mxma\_ d1q8ia1 d1y97a1 d1w0ha\_ d1kfsa1 d2py5a1 d1noya\_ d1d5aa1  
d1yt3a3 d2guia\_ d3mwpal d4kb1a\_ d1liv0a\_ d2d5ra1 d1b9ra\_ d1offa\_  
d1frra\_ d3wcqa\_ d1e9ma\_ d115pa\_ d1wria\_ d1i7ha\_ d3av8a\_ d1czpa\_  
d1rfka\_ d3p1ma1 d3b2ga\_ d2bt6a2 d3nvva1 d1krha3 d2h88b1 d1n62a2  
d1t3qa2 d1kf6b2 d1zoyb1 d1jq4a\_ d1ffva2 d1dgja2 d1rm6c2 d1jmx2  
d1jmx1 d1pbya1 d1r7ha\_ d1faaa\_ d1wika1 d1xfla\_ d1ttza1 d2f51a1  
d1ti3a\_ d1nhoa\_ d1sena\_ d2i4aa\_ d1ep7a\_ d1zmaa1 d1fo5a\_ d3lefa1  
d3diea1 d2yana1 d1z6na1 d1oaza\_ d3zywa1 d4aj8a\_ d1nm3a1 d4fiwa\_  
d1wmja\_ d4hs1a1 d1iloa\_ d1xwaa1 d1wjka1 d2vmla\_ d1fb6a\_ d1gh2a\_  
d1h75a\_ d1nw2a\_ d1kx5b\_ d3a6na\_ d4m6ba2 d2nqbd\_ d3wkjd\_ d2yfwe\_  
d4h9na\_ d5bnxa\_ d1kx5c\_ d3r45a\_ d1eqzb\_ d4jjnb\_ d1f66c\_ d1eqza\_  
d4wnnb\_ d1kx5a\_ d1u35c1 d1id3a\_ d2nqbc\_ d1kx5d\_ d1f1ea\_ d1b67a\_  
d2b5ea2 d2b5ea3 d2b5ea1 d2b5ea4 d2kp1a1 d2kp2a1 d1hyua3 d1hyua4  
d1j08a1 d1pd212 d1nhya2 d2a2ra2 d1k0dd2 d1f2ea2 d1gsua2 d1f3ba2  
d2fhea2 d2pvqa1 d1tw9a2 d1oyja2 d1e6ba2 d1k0ma2 d3ik7a1 d4is0a1

d1r5aa2 d1jlva2 d1m0ua2 d3gtub2 d1z9ha2 d1okta2 d1axda2 d2gsra2  
d1tu7a2 d1k3ya2 d1zgma1 d1b48a2 d1gnwa2 d1gwca2 d2gsta2 d1glqa2  
d1oe8a2 d1pn9a2 d1v2aa2 d1fw1a2 d1duga2 d3vrda1 d3vrda2 d1fcdc1  
d1h1oa2 d1h1oa1 d1m70a2 d1m70a1 d1a0rp\_ d1iqca2 d1iqca1 d1eb7a2  
d1eb7a1 d1nmla2 d4ilya\_ d4olta\_ d1qgia\_ d1qqya\_ d1gd6a\_ d1livma\_  
d2gv0a\_ d1iiza\_ d2z2fa\_ d1j8xa\_ d1ghla\_ d1b9oa\_ d1741a\_ d1691a\_  
d2o4wa\_ d1p37a\_ d1k28a3 d1xjta1 d1jtma\_ d2f2qa\_ d4e97a1 d3w3ea\_  
d4tx7a\_ d3cq1a\_ d4msta\_ d3iwra\_ d2z37a\_ d4dyga\_ d2k4ua\_ d1hp2a\_  
d2lu9a\_ d1baha\_ d2meoa1 d1wm7a\_ d1hlya\_ d1n8ma\_ d1wpda\_ d1c55a\_  
d1pvza\_ d1wt7a\_ d1rjia\_ d1wz5a\_ d1m2sa\_ d1pjva\_ d1c49a\_ d1qkya\_  
d2ktca1 d1wmta\_ d1du9a\_ d1j5ja\_ d1r1ga\_ d2pjsa1 d1k1la\_ d2i7ra1  
d1ecsa\_ d1xqaa1 d5cj3a1 d1npba\_ d1jifa\_ d2p7oa\_ d1nkia\_ d1ro5a1  
d1s5ja2 d1qhta2 d4dlea2 d1tgoa2 d3py8a2 d1q8ia2 d1kfsa2 d2py5a2  
d1d5aa2 d1qsta\_ d2beia1 d4m3sa\_ d1u6ma1 d1ygha\_ d1yk3a1 d3dr6a\_  
d1xmta\_ d1z4ea1 d2ge3a1 d1bo4a\_ d2fiaa1 d2jdca1 d1y9wa1 d3to7a\_  
d1wwza1 d2f14a1 d2ozua1 d2b5ga\_ d2cy2a1 d2p0wa\_ d1cm0a\_ d4pswa\_  
d1yrea1 d1yr0a1 d1m4ia\_ d2gana1 d1yvka1 d1ghea\_ d2g3aa1 d1y7ra1  
d2euia1 d1q2ya\_ d2fsra1 d1xeba\_ d2ae6a1 d1cjwa\_ d1qsma\_ d2aj6a1  
d1y9ka1 d1i12a\_ d1vkca\_ d2atra1 d1n71a\_ d2d4pa1 d2fiwa1 d2fe7a1  
d1tiqa1 d2ou2a\_ d1yx0a1 d2fcka1 d1p0ha\_ d2j8ma\_ d2pq8a\_ d1z4ra1  
d1s3za1 d1ufha\_ d2hqya1 d2hqya2 d1lrza2 d1ne9a1 d1lrza3 d1xvqa1  
d1pn0a2 d3hy2a\_ d2cvba1 d1o8xa\_ d1lu4a\_ d1we0a1 d2bmxa1 d2a4va1  
d1psqa\_ d1xiya1 d1q98a\_ d1n8ja\_ d1zofa1 d2ggta\_ d3tjja\_ d4je1a1  
d1o73a\_ d3s9fa\_ d2zcta\_ d1qmva\_ d1jfua\_ d2b1ka\_ d5dvba1 d2b5xa1  
d2v2ga\_ d3tb2a\_ d41lra\_ d4fh8a1 d1e2ya\_ d1knga\_ d2h30a\_ d1i5ga\_  
d2z9sa\_ d2f8aa1 d1tp9a1 d2b7ka\_ d1nm3a2 d3hvva\_ d2wfca1 d4kcea\_  
d1xvwa1 d4gqca1 d3qpma\_ d4k1fa\_ d1zzoa1 d1gpla\_ d1prxa\_ d4od7a1  
d1z6ma1 d4mcua1 d4dvca1 d3l9sa\_ d1un2a\_ d3rppa\_ d1zsqal d2m5ta\_  
d1cqqa\_ d1wqsa\_ d5bpea\_ d2ipha\_ d1lvoa\_ d2bhga1 d3tnta\_ d3sjia\_  
d3d23a1 d2fyqa\_ d3tloa\_ d3zvea1 d3q3ya1 d4asha1 d1cg2a1 d1yloa2  
d1y7ea2 d1y0ya3 d1lfwa1 d1vixa1 d1fnoa4 d1vhua2 d1ysja1 d1vhea2  
d1z2la1 d2fvga2 d1vgya1 d1r3na1 d2grea2 d1xmba1 d1rtqa\_ d1w52x1  
d2ppla1 d1hpla2 d1lpbb2 d2oxea1 d1bu8a2 d1rpla2 d1ys1x\_ d4hs9a\_  
d1ispa\_ d1ex9a\_ d3qmma\_ d1lgya\_ d4l3wa\_ d1llfa\_ d1gz7a\_ d1lukca\_  
d4wfia\_ d4cg1a1 d3visa\_ d1t61c1 d2ftba\_ d1pmpa\_ d2rcqa1 d1fdqa\_  
d4lkpa\_ d1sa8a\_ d1vyfa\_ d1lpja\_ d3vg7a1 d4azqa1 d1o8va\_ d5bvqa\_  
d1p6pa\_ d2qo4a\_ d1opba\_ d1yiva1 d1o1va\_ d4bvma1 d4tkba\_ d4i3ba\_  
d1bwya\_ d1ftpa\_ d1ggla\_ d4gkca\_ d3p6da1 d1kqwa\_ d2a0aa1 d3zxha\_  
d1cgla\_ d1rm8a\_ d1eaka2 d1hy7a\_ d2jsda\_ d1cxva\_ d1hv5a\_ d1i76a\_  
d1eb6a\_ d3p0ya1 d1igra1 d1igra2 d1n8yc1 d1m6ba2 d1m6ba1 d1m4la\_  
d2bk7a\_ d3fjua\_ d1z5ra1 d1kwma1 d1uwya2 d2c1ca1 d1dtda\_ d1h81a2  
d1ohfc\_ d1cixa\_ d1y29a\_ d1v7fa\_ d2jtba\_ d1d1ha\_ d1g9pa\_ d1lupa\_  
d1qk7a\_ d1mb6a\_ d2a2va\_ d1niya\_ d1i25a\_ d1hvwa\_ d2mpqa\_ d1ie6a\_  
d1kqha\_ d1la4a\_ d2mxoa1 d1koza\_ d1qk6a\_ d1emxa\_ d1lqra\_ d1c6wa\_



d1rmka\_ d1ixta\_ d1eyoa\_ d1cnna\_ d1fu3a\_ d1glpa\_ d1f3ka\_ d1fyga\_  
d1rypd\_ d1irua\_ d1rypc\_ d3unfk\_ d1rypa\_ d1j2pa\_ d1irui\_ d1j2qh\_  
d3unfh\_ d1m4ya\_ d1rypb\_ d1irul\_ d1irug\_ d1iru2\_ d1q5rh\_ d1rypg\_  
d1g3ka\_ d1iruf\_ d1q5qa\_ d1e94a\_ d1irub\_ d1ryph\_ d3ty6a\_ d1iruj\_  
d1iruk\_ d1rype\_ d1irud\_ d1irue\_ d3mi01\_ d1rypf\_ d2z3ba\_ d1iruc\_  
d3mka2\_ d1iru1\_ d1e88a1 d1l6ja5 d1l6ja4 d1eaka4 d1eaka3 d1l6ja3  
d1h8pa2 d1mqta\_ d1d4m3\_ d1fmd3\_ d2mev1\_ g1aym.1 d1ev13\_ d4q4w1\_  
d1r1a3\_ d2x5ia\_ g1r1a.1 g1d4m.1 g1rhi.1 d1b35b\_ d1loopa\_ d1tme1\_  
d4iv1a\_ g1pvc.1 g1fpn.1 d1fpn1\_ d4gb31\_ d1d4m1\_ d1fmd1\_ d1ev11\_  
d2wzr3\_ g1cov.1 d1qqp3\_ g1fmd.1 d2x5ic\_ d1rhi3\_ g1loop.1 d1hxs1\_  
g1hxs.1 d1fpn3\_ d1bev1\_ g2mev.1 d1eah3\_ d1aym1\_ d1pvc3\_ d1qqp1\_  
d1zba3\_ d1h8ta\_ d3vbhc\_ g1b35.1 g1bev.1 d1hxs3\_ g1ev1.1 d1bev3\_  
g1tmf.1 d1tmf1\_ d1b35a\_ d2mev3\_ g1eah.1 g1h8t.1 d1eah1\_ d4q4w3\_  
d1r1a1\_ d1aym3\_ d1pvc1\_ d1zba1\_ d1h8tc\_ d1loopc\_ d1tme3\_ g1qqp.1  
d4iv1c\_ g1tme.1 d3ubub\_ d1egia\_ d1qo3c\_ d1v7pa\_ d1tdqb\_ d3ubua\_  
d1c3ab\_ d1h8ua\_ d3bx4b\_ d1t8ca1 d1sb2a1 d1qdda\_ d2ziba1 d3cada\_  
d1byfa\_ d1j34b\_ d1jwia\_ d1jzna\_ d1c3aa\_ d1oz7b\_ d1wmza\_ d3bdwb\_  
d1hq8a\_ d1dv8a\_ d3hupa\_ d1wk1a1 d1umra\_ d2afpa\_ d3bx4a\_ d1gz2a\_  
d1s16a\_ d1v7pb\_ d3g8ka\_ d1ixxa\_ d1j34a\_ d1jwib\_ d1g1sa1 d1y17a1  
d1ja3a\_ d1fvub\_ d3bdwa\_ d1sb2b1 d1fvua\_ d1umrc\_ d1oz7a\_ d4m17a\_  
d3cfwa1 d1ypqa1 d1g1ta1 d3fd4a\_ d3l9jc\_ d4dn8a1 d1v4lb\_ d1rd11\_  
d2msba\_ d4w9ta\_ d1jvna1 d4x2ra1 d1ka9f\_ d1qo2a\_ d4axka1 d1thfd\_  
d4u28a\_ d2y88a\_ d4wd0a\_ d1vzwa1 d1ix2a\_ d4lt9a1 d3tc7a1 d3hoja\_  
d1i4na\_ d3vnda\_ d3n18a1 d1geqa\_ d3navaa1 d1v5xa\_ d4a2ra1 d3tc6a1  
d1ujpa\_ d4ijba\_ d1xcfa\_ d1vc4a\_ d1rd5a\_ d3b5va\_ d2r80b\_ d1cqxa1  
d1cg5a\_ d1gcvb\_ d3boma\_ d2h8fb\_ d2raoa\_ d3bj1a\_ d4hrrb\_ d2r50a\_  
d3d1kb\_ d2aa1b1 d3zhwa\_ d3hf4b\_ d3gdja\_ d1jebb\_ d3bj1b\_ d1x9fb\_  
d1wmub\_ d1gcva\_ d3bcqb\_ d3d4xb\_ d1gvha1 d2dc3a\_ d3hf4a\_ d4yu3a\_  
d3k8ba\_ d1qpwb\_ d2r80a\_ d3bcqa\_ d1v4wa\_ d3wtgb\_ d1j17a\_ d4esaa\_  
d1a9we\_ d3d1ab\_ d1fsla\_ d4h21a\_ d1v4wb\_ d1mwca\_ d1vhba\_ d1jeba\_  
d1spgb\_ d1h97a\_ d1q1fa\_ d1tu9a1 d3d1aa\_ d1hdsb\_ d3hyub\_ d2zfb\_ b\_  
d3fs4a\_ d1oj6a\_ d1shrb\_ d4h21b\_ d4yu3b\_ d1spga\_ d3hrwa\_ d3qqra\_  
d3at5a\_ d4wchd\_ d3hyua\_ d1cg5b\_ d1uc3a\_ d1hbra\_ d2raob\_ d1outb\_  
d4esab\_ d3gdjb\_ d3qqqa\_ d1x9fc\_ d3vrf\_ a\_ d1itha\_ d3mkba\_ d3d4xa\_  
d3mjpa\_ d1j16a\_ d3fh9a\_ d1outa\_ d2dc3b\_ d1it2a\_ d3eoka\_ d3g46a\_  
d1qpwa\_ d3vrfb\_ d1ch4a\_ d1x9fd\_ d1hdsa\_ d2zfb\_ a\_ d3mkbb\_ d1or4a\_  
d3wtga\_ d1a4fa\_ d3fh9b\_ d3bomb\_ d3cy5a\_ d3at5b\_ d1x9fa\_ d2oifa\_  
d4lmbx\_ d1cpcb\_ d3v57a\_ d1kn1a\_ d1cpca\_ d4f0ta\_ d2vjha\_ d4po5b\_  
d1eyxa\_ d1alla\_ d4f0tb\_ d1b33b\_ d1b8db\_ d4h0mb\_ d1b33a\_ d2vjhb\_  
d4lmb6\_ d2vmlb\_ d1a11b\_ d2vjta\_ d3dbja\_ d2vmla\_ d2vjtb\_ d4f0ub\_  
d1f99b\_ d4rmpa1 d1liaa\_ d1eyxb\_ d2uulb\_ d4lmsb\_ d4f0ua\_ d2bv8a\_  
d1f99a\_ d2bv8b\_ d2c71b\_ d3dbjb\_ d4rmpb1 d1b8da\_ d4h0ma\_ d3v57b\_  
d1kn1b\_ d1liab\_ d2uula\_ d2j96a\_ d3ia2a\_ d1a88a\_ d4dgqa1 d1hkha\_  
d1zoia\_ d2xqfa\_ d1ea5a\_ d1f6wa\_ d1dx4a\_ d1qe3a\_ d1k4ya\_ d4qwwa\_

d2ha2a\_ d1sfra\_ d1f0na\_ d4qeka\_ d3c8da2 d2pbla1 d1jkma\_ d1lzla\_  
d1jjfa\_ d2qvba\_ d2v9za\_ d4kafa1 d4iuaa3 d4bvva\_ d5hpga\_ d3k65a\_  
d1ki0a3 d1ki0a2 d1ki0a1 d1a0ha1 d1pmla\_ d3sp8a3 d2feba1 d1f74a\_  
d3l21a\_ d2e1da\_ d1to3a1 d1w3ia\_ d1sfla\_ d1n7ka\_ d1vcva1 d4imea\_  
d1wa3a\_ d2ocza1 d1f2ja\_ d3m16a\_ d2yxga\_ d1ub3a\_ d3a5fa\_ d1fbaa\_  
d1l6wa\_ d1xfba1 d1wx0a1 d1vpxa1 d1ojxa\_ d1mxsa\_ d2a4aa1 d1xkya1  
d3cq0a1 d3s1xa\_ d1f05a\_ d1fdja\_ d3cpra1 d4d2ja\_ d4mh8a\_ d4i7ga1  
d3rp2a\_ glucy.1 d1fuja\_ d2zchp\_ d3w94a\_ d1si5h\_ d1l06a\_ g2pka.1  
d1cgha\_ d1kigh\_ d1a5ia\_ d3s9ba\_ d1hj8a\_ d1ao5a\_ d2anya\_ d1q3xa1  
d1gvza\_ d1azza\_ d4gsoa\_ d2f91a1 d1iaua\_ d1eufa\_ g1fiw.1 d1eq9a\_  
d4nfea\_ d2rdla\_ d1spja\_ d1elva1 d1a7sa\_ d1ekbb\_ d1pfxc\_ d1yc0a\_  
d2aiqa\_ g1fiz.1 d1fi8a\_ d4k60a\_ d4dgja\_ d1mzaa\_ d1op0a\_ d3tjva\_  
d1pytd\_ d1sgfg\_ g1gg6.1 d2eeka\_ g1rtf.1 d1a0ja\_ d3g01a\_ d1pytc\_  
d4e7na\_ d1ddja\_ d1z8ga1 d2hlca\_ d1npga\_ d1brup\_ g1jou.1 d1sgfa\_  
d1autc\_ g2hnt.1 g1kdq.1 d1orfa\_ d3s69a\_ d4crga\_ d1fxya\_ d1bqya\_  
d1svpa\_ d1mbma\_ d3su6a1 d1cu1a1 d4agka\_ d1vcpa\_ d1q31a\_ g1n11.1  
d3e90b\_ d1ep5a\_ d3u1jb\_ d1jx4a2 d3gv5b1 d1t94a2 d3bq0a2 d3lgia\_  
d3i77a\_ d2z9ia2 d4nsva\_ d1lcya2 d4jcna\_ d1agja\_ d1os8a\_ d1hpga\_  
d1p3ca\_ d1l1ja\_ d1qtfa\_ d1e69a\_ d1mv5a\_ d3g60a4 g1ii8.1 d1ewqa2  
d1ji0a\_ d1v43a3 d2wmfa1 d1vpla\_ d1g2912 d4a82a2 g1f2t.1 d2d62a1  
d3tuic1 d2bbsa1 d3g60a3 d2ixea\_ d1g6ha\_ d1sgwa1 d2qi9c\_ d3rlfa1  
d3b60a1 d3d31a2 d2pzea1 g1xew.1 d1jj7a\_ d1oxxk2 d2onka1 d1wlwa\_  
d1iwea\_ d1qf5a\_ d1vmaa2 d1nija1 d1np6a\_ d2p67a1 d3ihla\_ d1ls1a2  
d1slma2 d1liona\_ d2v40a\_ d1dj3a\_ d3hida\_ d2vo1a1 d2g0ta1 d1vcoa2  
d1j8mf2 d1g3qa\_ d1xjca\_ d1p9ba\_ d1qzxa3 d1ihua2 d1ihua1 d2qm8a\_  
d1dj2a\_ d4ioja\_ d1cp2a\_ d1yrba2 d1hyqa\_ d3gqba2 d1xp8a1 d1tf7a2  
d1tf7a1 d1ye8a1 d1skyb3 d2qe7d2 d4blta\_ d4huta\_ d3l1daa2 d4hyya\_  
d2i3ba1 d1cr1a\_ d3j9tb2 d3ntua2 d1vdza1 d2z43a\_ d1e9ra\_ d1nlfa\_  
d3ziaa2 d1n0wa\_ d1g6oa\_ d3ziad2 d3j9ta2 d1pzna2 d3gqbb2 d2i49a\_  
d1nnfa\_ d1xvxa\_ d1ursa\_ d1h3da1 d1iuda\_ d4m1va1 d1twya\_ d3e13x\_  
d2nxoa1 d4pfua\_ d3ttma\_ d1elja\_ d2qmwa1 d1us5a\_ d1y3na1 d1jeta\_  
d1uqwa\_ d4f19a1 d2esna2 d3thia\_ d3fasa1 d2uyeb\_ d2xwva1 d1r9la\_  
d2fyia1 d1pb7a\_ d2ozza1 d1sw5a\_ d1nh8a1 d1vr5a1 d2g29a\_ d1xs5a\_  
d3lswa\_ d2z23a\_ d3w9va\_ d3tcha\_ d1q35a\_ d1z7me1 d3q27a\_ d1p99a\_  
d1ve4a1 d2i6ea1 d4mcoa1 d4n8ya\_ d1eu8a\_ d1zbma1 d1hsla\_ d1lixca2  
d1j1na\_ d1xvya\_ d1y9ua\_ d2z22a1 d1xoca1 d4oera\_ d1wdna\_ d5f1qa1  
d1xt8a1 d1i6aa\_ d4gwoa\_ d4igta1 d1pc3a\_ d4mmpa1 d1o63a\_ d2cz1a1  
d2onsa2 d4mija1 d4ok5a1 d2bmfa1 d2bmfa2 d1yksa1 d1yksa2 d1jr6a\_  
d2qeqa1 d2j1qa1 d1a1va2 d1eh3a\_ d3skpa\_ d1dtza1 d1ieja\_ d1jnfa2  
d1ce2a1 d1jnfa1 d1b1xa2 d1b1xa1 d1jw1a1 d1jw1a2 d1ryoa\_ d1h76a1  
d1h76a2 d1c4oa1 d2p6ra3 d2p6ra4 d1oywa2 d1oywa3 d1wrba1 d1w36b2  
d1w36b1 d1c4oa2 d3bora\_ d1t6na\_ d2eyqa5 d2eyqa3 d2eyqa2 d2zu6a2  
d1veca\_ d1uaaa1 d1w36d1 d2g9na1 d1z3ix2 d2rb4a\_ d1hv8a1 d1hv8a2  
d1t5ia\_ d1w36c2 d2j0sa2 d2j0sa1 d1fuka\_ d3hjha1 d1z5za1 d1z63a1

d1s2ma2 d1s2ma1 d1wp9a1 d1wp9a2 d1gm5a3 d1gm5a4 d3dina4 d3dina3  
d1q0ua\_ d1w36c1 d1z3ix1 d1nkta3 d1nkta4 d1uaaa2 d1w36d2 glqhh.1  
d2fwra2 d2fwra1 d3q3ma\_ d1za0a1 d1mxra\_ d2inca\_ d1jk0a\_ d2incb\_  
d1mhyb\_ d3hf1b\_ d1mtyb\_ d1r2fa\_ d2uw1a\_ d1mhyd\_ d3n37a\_ d1oquc\_  
d1syya\_ d1mtyd\_ d2o1za\_ d1uzra\_ d1smsa\_ d2fkza\_ d1zuja1 d1s3qa1  
d2fjca1 d1z6om1 d1veia\_ d4dyya\_ d1jiga\_ d3gvya\_ d2pyba\_ d4cy9a1  
d3bvfa1 d1r03a\_ d2cf7a\_ d1nf4a\_ d1zs3a1 d4iwka\_ d3ka8a\_ d3np0x\_  
d1n1qa\_ d11b3a\_ d4e6ka\_ d1z6oa1 d2fzfa1 d4dyua\_ d3ge4a\_ d1jgca\_  
d4am4a\_ d2z6ma\_ d1ji5a\_ d1vlga\_ d11koa1 d1krqa\_ d3qz3a\_ d1o9ra\_  
d2ffxj\_ d1yv1a1 d2v2pa\_ d1j30a\_ d4di0a\_ d1dpsa\_ d1oewa\_ d2qzxa\_  
d2asia\_ d1psoe\_ d1smra\_ d2h6ta\_ d1pfza\_ d1izda\_ d3hd8a\_ d1j71a\_  
d1dpja\_ d4aa9a\_ d1t6ex\_ glb5f.1 gl1ya.1 glhtr.1 d1qdma2 d1bxoa\_  
d1wkra\_ d1tzsa\_ d1libqa\_ d2qzwa\_ d1ex4a2 d1c6va\_ d2v76a\_ d1wj1a1  
d1aqca\_ d1qqga2 d1qqga1 d1ntva\_ d1n3ha\_ d4dbba\_ d3f0wa1 d1p3ra\_  
d1wgua1 d2cy4a1 d3hqca\_ d1wvha1 d1xr0b1 d1bdqa\_ d3ggta\_ d3ixoa\_  
d1mrx\_ d2haha\_ d1tw7a\_ d4nj\_ d1sgua\_ d2p3da\_ d1nsoa\_ d3d3ta\_  
d2rkfa\_ d1c6ya\_ d2rspa\_ d3ogpa\_ d3ekwa\_ d2o4na\_ d2j9ja\_ d1baia\_  
d3ggua\_ d3lzua\_ d4npua\_ d4j55a\_ d2r8na\_ d2fxda\_ d2p3ca\_ d4dqa\_  
d3ttpa\_ d3t3ca\_ d2p3aa\_ d2hc0a\_ d2fdda\_ d3mwsa\_ d1wgda1 d1wgg1  
d4q5eb\_ d1wjna1 d1se9a\_ d3n3kb\_ d1wz0a1 d1we6a1 d2m0xa\_ d2gbka\_  
d3rt3b1 d1wh3a1 d1sifa\_ d2ekek2 d4ii2b1 d4hk2a1 d1c3ta\_ d1m94a\_  
d1wgha1 d1ttna1 d1wx8a1 d3v6cb1 d2ma9b\_ d4i61b1 d1bt0a\_ d2jvca1  
d1iyfa\_ d2k1fa\_ d1wxva1 d1wf9a1 d1t0ya\_ d2io0b2 d1x1ma1 d2gbma\_  
d1zw7a1 d2m17a\_ d1ud7a\_ d1we7a1 d21wpa\_ d2gbja\_ d1wjua1 d1v6ea1  
d1v86a1 d4eewa\_ d1wiaa1 d4icva\_ d4gu2a\_ d1wx7a1 d1wy8a1 d4hja1  
d2faza1 d1v5oa1 d2a13a1 d2cr5a1 d1wj4a1 d1s3sg\_ d3h33a\_ d1rwja\_  
d19hca\_ d1os6a\_ d3bxua\_ d3h4na\_ d1i77a\_ d3caoa\_ d2ctha\_ d1duwa\_  
d1ofwa\_ d2e84a\_ d1hh5a\_ d1gyoa\_ d3h34a\_ d2bcgg1 d2bcgg2 d1d5ta1  
d1iyka2 d1iyka1 d1rxta1 d1iica1 d1um8a\_ d1ixza\_ d1qvra2 d1qvra3  
d1qzma\_ d1sxjc2 d1jr3d2 d2p65a\_ d118qa2 d1g8pa\_ d3hu3a3 d1sxjd2  
d1njfa\_ d1in4a2 d1sxja2 d1tuea1 d2ce7a2 d1w5sa2 d1sxjb2 d1d2na\_  
d1ny5a2 d2gnoa2 d2a5yb3 d1fnna2 d1u0ja1 d1lv7a\_ d1iqpa2 d2fnaa2  
d1ixsb2 d4gita\_ d1sxje2 d1g41a\_ d2e3fa\_ d1mm0a\_ d2e3ea\_ d21lda\_  
d2ny8x\_ d2e3ga\_ d2ny9x\_ d2nz3a\_ d21j7a\_ d1n4na\_ d2m8bb1 d2kyqa\_  
d3psma\_ d1jkza\_ d1jxca\_ d2g11a\_ d1ugla\_ d4uj0a\_ d1js9c\_ d1f15b\_  
d1za7a\_ d11aja\_ d1t0za\_ d2i61a\_ d1t1ta\_ d1sn4a\_ d1kv0a\_ d21kba\_  
d1npia\_ d1wwna\_ d1pe4a\_ d2kbka\_ d21i7a\_ d1djta\_ d2kbha\_ d1dq7a\_  
d1sega\_ d1omya\_ d1zywa1 d1jzaa\_ d1n9wa1 d1bbua1 d1e1oa1 d1b8aa1  
d110wa1 d3a74a1 d1eova1 d1bvsa3 d1iyjb4 d1iyjb5 d1iyjb3 d1o7ia\_  
d4ipca1 d1x3ea\_ d4apva\_ d1jb7a1 d1jb7a2 d1jb7a3 d3kdfa\_ d1ue1b\_  
d1wjja1 d3eiva\_ d1xjva2 d1xjva1 d2ccza2 d1se8a\_ d111oc\_ d1jb7b\_  
d3ulla\_ d1qzga\_ d1miua4 d1miua5 d1miua3 d1y14b1 d2nn6i1 d1i941\_  
d2zjra2 d1smxa\_ d2qamc2 d1hh2p1 d2r7da1 d1rl2a2 d1wfqa1 d3bzka4  
d1x6oa2 d3a0ja\_ d2j01d2 d2ja9a1 d4q15a\_ d1hr0w\_ d1luza\_ d2n3sa\_

d2vnud1 d1h95a\_ d1go3e1 d2nn6h1 d2mola\_ dliz6a2 dljjga\_ d1e3pa2  
d2ix0a3 d2ix0a2 d2lxja\_ d1ueba3 d1ueba2 d2z0sa1 d1u0la1 d2ix0a1  
d2eifa2 d2je6i1 d3i2za1 d2c35b1 d2ahob2 d1t9ha1 d3i4oa\_ d2qall1  
d1jt8a\_ d2nn6g1 d1g6pa\_ d3cama\_ d1i94q\_ d1c9oa\_ d1d7qa\_ d2ba0a1  
d2vnud2 d2vnud3 d1khia2 d2qalq1 d1wi5a1 d1xtda2 d1ny4a\_ d1dzka\_  
d4tlja\_ d2a2ua\_ d4wfva\_ d3t1da\_ d4iaxa\_ d3zq3a\_ d2nnda\_ d1i4ua\_  
d1kxoa\_ d1bbpa\_ d1kt7a\_ d1exsa\_ d3s26a1 d1lf7a\_ d1qfta\_ d4gh7a\_  
d1z24a1 d1qabe\_ d1xkia\_ d3bx7a\_ d4iawa1 d1n0sa\_ d1gkab\_ d3kzaa\_  
d2k23a\_ d2l9ca1 d2joza1 d1gm6a\_ d3kffa\_ d3saoa1 d1e5pa\_ d1yupa1  
d1iiua\_ d1xwdc1 d3kj4a\_ d1ozna\_ d1w8aa\_ d2ifga3 d1xkua\_ d1rpma\_  
d2shpa1 d1yfoa\_ d1l8ka\_ d2ooqa1 d1p15a\_ d1lara2 d1lara1 d1wcha\_  
d2fh7a2 d2fh7a1 d1ohea1 d1ohea2 d2f4da\_ d1rxda\_ d2hxpa\_ d1xria\_  
d1d5ra2 d3ezza\_ d4y2ea\_ d1i9sa\_ d3azya\_ d3wvja\_ d1upsa1 d1ajoa\_  
d2hyka\_ d1ajka\_ d2vy0a\_ d1o4ya\_ d3o5sa\_ d3d6ea\_ d3atga\_ d1dypa\_  
d1umza\_ d3i4ia\_ d4lbqa\_ d1a78a\_ d1slta\_ d4no4a\_ d3zsja\_ d3duia\_  
d1g86a\_ d1is3a\_ d1qmja\_ d1hlca\_ d1tdha3 d1q3ba3 d1k82a3 glqmo.1  
g1len.1 d3zyra\_ d1fnya\_ d1n47a\_ g2ltn.1 d1avba\_ d3usua\_ d1dhkb\_  
d1f9ka\_ d1lukga\_ d1g8wa\_ d1g9fa\_ d1wbfa\_ d3wcsa\_ d1g7ya\_ d1mvqa\_  
d1hq1a\_ d1v6ia\_ d1dbna\_ d1qnwa\_ d1fx5a\_ d4l8qa\_ d1ioaa\_ d3n35a\_  
d3ubra\_ d1qo8a1 d1d4ca1 d2k3va\_ d1ft5a\_ d1qdba\_ d1m1qa\_ d2j7aa\_  
d1h21a\_ d1ogyb\_ d4fasa\_ d1oaha\_ d1sp3a\_ d1eysc\_ d2h0ba\_ d2erfa\_  
d1h30a2 d3mw4a1 d1pz7a\_ d2r1ba\_ d3v64a1 d1d2sa\_ d3bopa1 d3mw3a1  
d1okqa1 d1okqa2 d1dszb\_ d1a6ya\_ d3cbbba\_ d1ynwa1 d1r4ia\_ d1hcqa\_  
d2hana\_ d2hanb\_ d2enva1 d1kb4b\_ d2n11b\_ d1lola\_ d1cita\_ d2dara2  
d2dara1 d1wyha2 d2dloa2 d1rutx4 d1rutx3 d2cuqa2 d1x4la2 d1x4la1  
d1x3ha2 d1x3ha1 d2d8za1 d1x61a2 d1x6aa1 d1x6aa2 d2cora2 d2cora1  
d1v6ga1 d1v6ga2 d2d8za2 d1x64a1 d1x64a2 d1b8ta1 d2co8a1 d1x63a2  
d2dj7a2 d2dj7a1 d2cu8a2 d2cu8a1 d1g47a2 d1g47a1 d1j2oa1 d1wyha1  
d2dloa1 d1wiga1 d1wiga2 d2cupa2 d2cupa3 d1x68a1 d2d8ya2 d2d8ya1  
d1m3va2 d1x62a1 d1x68a2 d1x61a1 d1b8ta3 d1b8ta2 d2d8xa2 d2d8xa1  
d1x4ka1 d1x4ka2 d2cuqa1 d1m3va1 d2co8a2 d1j2oa2 d1x63a1 d2cura1  
d2cura2 d1x62a2 d2aq2b1 d1enfa1 d1i4pa1 d1v1oa1 d1et9a1 d1esfa1  
d2g9hd1 d4ohja1 d1klud1 d1bxta1 d1eu3a1 d1ty0a1 d1fnua1 d1c4qa\_  
d2wv6d\_ d1prtf\_ d1l1trd\_ d4l63b1 d1r4pb\_ d1prtd\_ d1t10f\_ d2bosa\_  
d1prtb1 d3chbd\_

**Family-19 (b.1.1.3)**

**Positive dataset contains 2 protein sequences.**

d2d9qb1 d2nxyb2

**Negative dataset contains 3175 protein sequences.**

d1m32a\_ d1libja\_ d1c7na\_ d1iuga\_ d4q75a\_ d2bkwa1 d1t3ia\_ d1n8pa\_  
d1qz9a\_ d1jff9a\_ d1leg5a\_ d1p3wa\_ d3kgwa\_ d1c11a\_ d2ctza1 d1vjoa\_  
d2rfva\_ d1gc0a\_ d1cs1a\_ d1d2fa\_ d2ch1a1 d1qgna\_ d1pffa\_ d1tq5a1  
d1u08a\_ d1b5pa\_ d2ay1a\_ d1bw0a\_ d3pd6a\_ d7aata\_ d2csta\_ d1j32a\_  
d1fg7a\_ d4wlha\_ d1o4sa\_ d1v2da\_ d1gdea\_ d1m6sa\_ d1v72a1 d1svva\_

d1ajsa\_ d1wsta1 d2f8ja2 d1lk9a\_ d1vp4a1 d1xi9a1 d2gb3a1 d1yaaa\_  
d2bnma2 d3i2ka1 d1lnsa3 d1mpxa2 d2cfba1 d1dfoa\_ d1o69a\_ d1bj4a\_  
d3k28a\_ d2bwpa\_ d3lg0a\_ d2fnua\_ d3ou5a\_ d1z7da1 d1b9ha\_ d1iaya\_  
d4msoa\_ d1bs0a\_ d1s0aa\_ d1sffa\_ d3tqxa\_ d1mdoa\_ d3qboa\_ d3pgya\_  
d1bjna\_ d2dkja\_ d1ejia\_ d1vefa1 d4wxga\_ d3bs8a\_ d3gbxa1 d1w23a\_  
d1fwxa1 d1libya\_ d1f56a\_ d1bypa\_ d1azca\_ d1ws8a\_ d3u25a\_ d1cuoa\_  
d1id2a\_ d1rkra\_ d2iaac\_ d4dp1x\_ d1nwpa\_ d2gima\_ d2i7sa\_ d1qhqa\_  
d3ehbb1 d1fftb1 d1gyca3 d1hfua2 d1kbva1 d1kbva2 d1sdda1 d1sdda2  
d1gyca1 d1gyca2 d1mzya1 d2bw4a1 d1aoza1 d1aoza3 d1aoza2 d1kyaa2  
d1kyaa1 d1mzya2 d4e9sa1 d1sddb1 d1sddb2 d1hfua1 d1hfua3 d1oela2  
d1oela1 d1v10a2 d1v10a3 d1v10a1 g1f8v.1 d2bbvc\_ d3sxwa1 d4luka\_  
d1a3qa1 d1iknc\_ d3brda1 d1oy3c\_ d1imhc1 d1gjia1 d1zk9a1 d2cxka1  
d2h0va\_ d1ofda3 d1ea0a3 d1ecfa2 d1q15a2 d1ct9a2 d1ao0a2 d1te5a\_  
d1ep0a\_ d2pa7a1 d1wlta1 d1nxma\_ d2c0za1 d1nepa\_ d1ktja\_ d1ds6b\_  
d1fstb\_ d1ex0a1 d2b5ea2 d2b5ea3 d2b5ea1 d2b5ea4 d2kp1a1 d2kp2a1  
d1hyua3 d1hyua4 d1j08a2 d3nvva1 d1krha3 d2h88b1 d1t3qa2 d1kf6b2  
d1zoyb1 d1jq4a\_ d1ffva2 d1dgja2 d1rm6c2 d1ydwa2 d2nvwa2 d1zh8a2  
d1qkia2 d1xeea2 d1tlta2 d1au7a2 d1lic8a2 d2ovga\_ d1sq8a\_ d1rzsa\_  
d3kz3a\_ d3orca\_ d3gpdg2 d2q49a2 d1hdgo2 d2g17a2 d2cvoa2 d2czca1  
d3pwka2 d1obfo2 d1zyao2 d2pkqo2 d1b7go2 d2hjsa2 d1cf2o2 d1vkna2  
d1nvm2 d1a0rp\_ d2msya\_ d2djoa1 d2r5za\_ d1au7a1 d2lmda1 d1akhb\_  
d1s7ea1 d3nara\_ d1zq3p1 d2craa1 d1mija\_ d4uuta\_ d3a01a\_ d1x58a1  
d3rkqa1 d3cmya1 d2cqxa1 d2da6a1 d1e3oc1 d1fjla\_ d1mh3a1 d1ig7a\_  
d1x41a1 d1wh7a1 d1gt0c1 d2mw8a\_ d1lfup\_ d1x2ma1 d1b72a\_ d1wi3a1  
d1jgga\_ d1wjha1 d1x2na1 d1mnmc\_ d2cuea1 d3k2aa\_ d2hosa\_ d2jwta2  
d1pufa\_ d1octc1 d2hi3a\_ d1b8ia\_ d4j19a\_ d3lnqa\_ d1wh5a1 d1b8ib\_  
d1fexa\_ d2cqra1 d1guua\_ d1ug2a1 d2cqqa1 d2ajea1 d4a69c\_ d1h8ac1  
d2crga1 d2iw5b1 d1xc5a1 d1ofcx1 d2cu7a1 d1wgxa1 d2cjja1 d2ckxa1  
d1gvda\_ d1hcra\_ d1tc3c\_ d1gdta1 d1u78a2 d6paxa1 d6paxa2 d1k78a1  
d1k78a2 d1hlva1 d1hlva2 d1iufa1 d3lv8a\_ d1s3ga1 d1zaka1 d1s4qa\_  
d3tvta2 d1uf9a\_ d1khta\_ d1ckea\_ d1osna\_ d1p5zb\_ d3cm0a\_ d1tmka\_  
d1jaga\_ d3h86a\_ d1t0hb\_ d1nn5a\_ d2h92a\_ d3kb2a1 d2c95a1 d1yj5a2  
d1kgda\_ d1ly1a\_ d2ak3a1 d1vyva2 d1deka\_ d2grja1 d1p3ja1 d1y63a\_  
d1e4ya1 d1s96a\_ d3iija1 d1lvga\_ d1nksa\_ d1vyua2 d4e22a\_ d1qf9a\_  
d1jjva\_ d1q3ta\_ d1ki9a\_ d1lw7a2 d1teva\_ d1kjwa2 d1gsia\_ d2iyva2  
d1kaga\_ d1e6ca\_ d1z0ja1 d3umra2 d3gj0a1 d2gaoa1 d1yzga1 d1x3sa1  
d1g7sa4 d1puja\_ d1udxa2 d1kk1a3 d2o52a\_ d1jwyb\_ d1zcaa2 d1zcba2  
d2fv8a1 d2cjwa\_ d3dz8a1 d1xzpa2 d1vg8a\_ d4qxaa\_ d2ew1a1 d1x1ra1  
d2bcgy\_ d3doea1 d3cona\_ d3rega\_ d3wyga\_ d1upta\_ d2b6ha1 d1zd9a1  
d1lnza2 d1r5ba3 d1r2qa\_ d2f91a1 d2rhda\_ d3q3jb\_ d3q85a\_ d1efma1  
d1r8qa\_ d2gf9a1 d2akab1 d1ek0a\_ d1z08a1 d2gcoa1 d2dy1a2 d4g01b\_  
d2cxxa1 d1svia\_ d3q72a\_ d1ni3a1 d4ac9a4 d2erxa1 d2bmea\_ d1wxqa1  
d2gf0a1 d4ldja1 d1zunb3 d1d5ca\_ d4lv5b\_ d1efca3 d1kmqa\_ d2g6ba1  
d3lrpa\_ d1tada2 d2y8ea\_ d4rd4a1 d1z06a1 d2heia\_ d3a58b\_ d1u01a2

d1d2ea3 d1zj6a1 d2ocba\_ d3rwoa\_ d1mr3f\_ d2e9sa1 d4u5xa1 d2iwra\_  
d2fn4a1 d3bwdd\_ d2nzja1 d2atva1 d2ksqa\_ d3l43a\_ d1mkya2 d1mkya1  
d1wmsa\_ d1jnya3 d2rmka\_ d1f6ba\_ d1f60a3 d1gota2 d1jala1 d2fh5b1  
d1g16a\_ d2wblc\_ d1m7ba\_ d1wf3a1 d1f5na2 d1t9ha2 d1z6xa1 d1z0aa1  
d2fg5a1 d2a5ja1 d2bcjq2 d1s0ua3 d1ky3a\_ d4y0va\_ d4lhwa\_ d2qmea1  
d2atxa1 d1egaa1 d1ryha\_ d1moza\_ d1nrjb\_ d2erya1 d3bfka\_ d1puia\_  
d1fzqa\_ d3j3az1 d3t5ga\_ d1shza2 d3defa\_ d2f7sa1 d3raba\_ d3tsoa\_  
d3aq4a\_ d2a17a1 d3sfva1 d3bc1a\_ d2ncda\_ d1sdma\_ d3h4sa1 d2heha\_  
d2grya\_ g3kin.1 d1kk8a2 d1br2a2 d1goja\_ d1f9va\_ d2mysa2 d1lkxa\_  
d3t0qa\_ d4db1a1 d3gbja\_ d1ry6a\_ d1v8ka\_ d1vava\_ d1luaia\_ d1y4wa1  
d1ig8a1 d1czan2 d1czan3 d1czan1 d1ig8a2 d1czan4 d1bg3a4 d1bg3a3  
d1bg3a2 d3h1jd1 d2d0oa3 d2d0oa2 d1nbwa2 d1hroa\_ d4gedb\_ d3zooa\_  
d1mz4a\_ d1gu2a\_ d1f1fa\_ d1dvva\_ d1c6ra\_ d1c75a\_ d1e29a\_ d1gdva\_  
d1cnoa\_ d1h32b\_ d1co6a\_ d2bh4x\_ d2aiua\_ d5cytr\_ d1jdl\_a\_ d1i8oa\_  
d2zboa\_ d3dmia\_ d1ls9a\_ d1wvec\_ d2yk3a\_ d3ph2b\_ d1dw0a\_ d5aura\_  
d1ql3a\_ d1qn2a\_ d1f1ca\_ d4zzva\_ d2xspa\_ d1eg1a\_ d4v20a\_ d1ojja\_  
d4ipma1 d4csia\_ d3pfza\_ d3ovwa\_ d2yoka\_ d2nqya\_ d1hixa\_ d1oa2a\_  
d1olra\_ d3b7ma\_ d4h7ma1 d3wp3a\_ d2vgda\_ d1igoa\_ d3zsea\_ d2nlra\_  
d3wx5a\_ d1oa3a\_ d1pvxa\_ d1m4wa\_ d1f5ja\_ d1oa4a\_ d1ks5a\_ d4ix1a1  
d1h32a1 d1evsa\_ d1cnt1\_ d1pvhb\_ d1z7ca\_ d1huwa\_ d1bgea\_ d1rhga\_  
d1f6fa\_ d1f45b\_ d1i1rb\_ d1axia\_ d1letea\_ d3tgxb\_ d1scfa\_ d2z3qa1  
d3qb1a\_ d1hula\_ d1m48a\_ d4nkqb\_ d1eera\_ d1v7mv\_ d5e4ea\_ d2o27a\_  
d3b5ka\_ d2psma1 d4zf7a\_ d3uf5a\_ d4x51a\_ d1d9ca\_ d4ypgc1 d3oq3a\_  
d1lqsl\_ d1n1fa\_ d1wu3i\_ d3bes1\_ d3ux9a\_ d1v8fa\_ d2ejca\_ d3muea1  
d1ihoa\_ d3q12a1 d3wdpp1 d3wq5a\_ d1gnxa\_ d4gxp\_a\_ d4hz8a\_ d1e4mm\_  
d3aiua\_ d1wcga1 d1qvba\_ d3ahxa\_ d1v02a\_ d2dgaa\_ d1pbga\_ d1vffa1  
d1qoxa\_ d4ha4a\_ d2el7a\_ d1iq0a2 d1irxa2 d1r6ta2 d1ivsa4 d2cyba\_  
d1rqga2 d1j09a2 d2yxna\_ d1f7ua2 d1h3fa1 d1ffya3 d2g36a1 d1nzja\_  
d1jila\_ d1n31a\_ d1pfva2 d1h3na3 d3n9ia\_ d3sz3a1 d1cmxa\_ d1xd3a\_  
d3ifwa\_ d3sw2a\_ d1moxc\_ d1dx5i3 d1edmb\_ d1aut12 d1aut11 d1nqlb\_  
d1dval1 d1szba2 d1kigl\_ d2y5f1\_ d1ijqa2 d1gk5a\_ d1g1sa2 d1nt0a3  
d1xdtr\_ d1lmja2 d1lmja1 d1nzia2 d2wphe\_ d1klil\_ d1pfx12 d1pfx11  
d1p9ja\_ d1g1ta2 d1f7ea\_ d4yzub\_ d2mgpa1 d1b9wa1 d1b9wa2 d2mgpa2  
d1obl2 d1n1ia2 d1n1ia1 d2npra2 d2npra1 d2y5ia\_ d1qlsa\_ d1psra\_  
d3n22a\_ d2egda\_ d4ggfc\_ d2wcea\_ d2luca\_ d4aqia\_ d3nsia\_ d2lp3a\_  
d1j55a\_ d1a4pa\_ d1k8ua\_ d1pvaa\_ d3fs7a\_ d2pvba\_ d1ttxa\_ d1rwya\_  
d2kyfa\_ d1rk9a\_ d1a75a\_ d1exra\_ d1tiza1 d1nyaa\_ d1g8ia\_ d1ggwa\_  
d1wdcc\_ d3fwba\_ d1ggza\_ d2o5ga\_ d1ctaa\_ d1m45a\_ d3i5gc\_ d1sl8a\_  
d1fpwa\_ d2scpa\_ d2roaa\_ d4aqra\_ d3pn7b\_ d1br1b\_ d2mysb\_ d1s6ca\_  
d1bjfa\_ d2obha\_ d1jfka\_ d1jf0a\_ d1qv0a\_ d1lkja\_ d2mlfc\_ d2m97a\_  
d2d8na\_ d4by5a\_ d1jbaa\_ d4nqga\_ d1wdcb\_ d2mysc\_ d1j7qa\_ d1s6ia\_  
d1uhka2 d1r2ua\_ d1dtla\_ d3kf9a\_ d3pn7c\_ d5d67d\_ d1tuza\_ d1h8ba\_  
d1eg3a1 d2zkmx1 d1snla\_ d1gjya\_ d1y1xa\_ d1hqva\_ d1dvia\_ d1df0a1  
d1qxp\_a2 d4us1a\_ d1k94a\_ d1wkya2 d1uuqa\_ d3wh9a\_ d4m1ra\_ d1xyza\_

d4xuya\_ d2je8a5 d4bf7a1 d3cuia\_ dlur4a\_ dlqw9a2 dlodza\_ d2vzsa5  
d1bqca\_ d2x2ya1 dlhjqa\_ dlqnra\_ d4y7ea1 dlvjza\_ d4k68a\_ d2v3ga\_  
d4hpga\_ d1nofa2 d1nq6a\_ dlh4pa\_ d1aq0a\_ d3ziza\_ d4bs0a\_ d1ecea\_  
d1h1na\_ d1ta3b\_ dlw91a2 dlilwa\_ dluhva2 dlus3a2 d1legza\_ d7a3ha\_  
d1tvna1 d3nyda1 dlghsa\_ d2cyga1 d4xv0a\_ d2c8na2 dlw32a\_ d3emca\_  
d1v6ya1 d1foba\_ d2uwfa1 d2f gla\_ d3niya1 d2c0ha1 dlrh9a1 d1yq2a5  
d1szna2 d1fa2a\_ dlpama4 d5do8a1 d1ea9c3 d2fhfa5 dlqhoa4 dlavaa2  
d1m53a2 d4m8ua1 d2gjpa2 dl1wha2 d4howa1 d1ktba2 dlj0ha3 d3vm5a1  
d2x1ia\_ dlwzaa2 dlusage2 d2diea1 dlmxga2 dlht6a2 dleswa\_ dliv8a2  
d5cpsa\_ dlud2a2 dlzjaa1 d3gbea1 dlkwa2 dlwdpa\_ dlgcya2 dlg5aa2  
d1hvxa2 d3dhp2a2 d2bhua3 d4do4a1 d3qgva1 d1e43a2 dlg94a2 d2d3na2  
d1gjwa2 dlgvia3 dlx1na1 dl1r7aa2 dl1tz7a1 glapy.1 d3ljqa\_ glk2x.1  
d4toqa\_ dlwb0a1 dlw9pa1 d1eoka\_ dlitxa1 dlkfw1a1 dlgoia2 d1ledqa2  
d2gsja\_ dlhjxa1 dljnda1 dl1vf8a1 dlumqa\_ dl1g2ha\_ dl1t77a2 dl1mixa2  
d1e5wa2 dl1j19a2 dl1isna2 d2a16b2 dl1g4ma1 d2hmta\_ dl1lssa\_ dl1b9ra\_  
d1offa\_ dl1frra\_ d3wcqa\_ d1e9ma\_ dl1l5pa\_ dl1wria\_ dl1i7ha\_ d3av8a\_  
d1czpa\_ dl1rfka\_ d3p1ma1 d3b2ga\_ d2bt6a2 dl1wgqa1 dl1v89a1 d2coda1  
d1zc3b\_ dl1wg7a1 dl1u5ea1 dl1v61a1 d2coca1 d2ys1a1 dl1v5pa1 dl1ntya2  
d1wjma1 dl1wila1 dl1u29a\_ dl1xx0a1 dl1unqa\_ d2zkmx3 dl1fhoa\_ dl1v88a1  
d2adza1 dl1x1fa1 dl1p6sa\_ d2coaa1 dl1btk\_ dl1v5ma1 dl1faoa\_ d2x18a\_  
d1dyna\_ dl1x1ga1 d4kaxb\_ d2j59m1 dl1xcga2 dl1txda2 dl1u5da1 dl1dbha2  
d1wlha\_ dl1upqa\_ dl1v5ua1 dl1foea2 d2fjla1 dl1eaza\_ d2dfka2 d2cofa1  
d1kz7a2 dl1h6ua1 d9l1dta1 d2ewda3 dl1up7a1 d2dfda1 dl1s6ya1 dl1vjta1  
d7mdha1 dl1hyea1 dl1t2da1 dl1ojsa3 dl1b8pa1 dl1ldna1 dl1hyha1 dl1civa1  
d2a92a1 dl1ez4a1 dl1i0za1 dl1y6ja1 dl1gv0a1 dl1ur5a1 dl1l1da1 dl1v8ba1  
d1gdha1 dl1l7da1 d2d1da1 dl1mx3a1 dl1ygya1 dl1qp8a1 dl1j4aa1 d2naca1  
dl1npya1 d3t4ea2 dl1a4ia1 dl1o0sa1 d2hk9a2 d2egga2 dl1b26a1 dl1bvua1  
dl1gg2a1 dl1c1da1 dl1leha1 dl1gtma1 dl1euzal dl1nvtal d3dona2 dl1gpja2  
dl1vi2a1 dl1p77a1 dl1nyta1 dl1b0aa1 dl1vl6a1 dl1v9la1 dl1txga2 d3f47a1  
dl1mv8a2 d2pv7a2 dl1xc2a3 d2ahra2 d4xiya1 d2f1ka2 dl1pgja2 dl1i36a2  
dl1np3a2 dl1lj8a4 dl1teaa3 dl1qmga2 d2i76a2 d2g5ca2 dl1wdka3 dl1dlja2  
d3cuma3 dl1kola2 dl1f8fa2 dl1qora2 dl1jqba2 dl1vj0a2 dl1cdoa2 dl1gu7a2  
dl1d1ta2 dl1xa0a2 d2dm6a2 dl1jvba2 dl1llua2 dl1h2ba2 dl1tt7a2 dl1piwa2  
dl1o89a2 dl1liz0a2 dl1e3ja2 dl1yb5a2 dl1uufa2 dl1vj1a2 dl1e3ia2 d3gpdg1  
dl1vc2a1 d2nvwa1 dl1u8fo1 dl1ydwa1 dl1hdgo1 d2g17a1 dl1cf2o1 d2czca2  
dl1r0ka2 dl1obfo1 d2cvoa1 dl1ebfa1 dl1h6da1 dl1i32a1 dl1zh8a1 d2q49a1  
dl1qkia1 dl1j5pa4 d3pzra1 dl1xeaa1 dl1vkoa1 dl1vm6a3 d3qvsa1 d2pkqo1  
dl1b7go1 dl1gr0a1 dl1p1ja1 dl1lc0a1 dl1j0xo1 d3pwka1 d2hjsa1 dl1zyao1  
dl1vkna1 dl1tlta1 dl1nvmbl d3sjua\_ d3ojfa1 dl1xu9a1 d2jjya1 dl1n7ha\_  
dl1ylpa1 dl1h5qa\_ dl1jtva\_ d4fs3a\_ d2bkaa1 dl1gy8a\_ d2c5aa1 dl1ulsa\_  
dl1ooea\_ d2b69a1 dl1y5ma1 dl1spxa\_ dl1aela\_ dl1bxka\_ dl1ydea1 dl1gega\_  
dl1hdoa\_ dl1o5ia\_ dl1e6ua\_ dl1snya1 d2rhca\_ d3zv4a\_ d5ceja\_ d2d1ya1  
dl1fjha\_ d3w8ea\_ d2fmua1 dl1x1ta\_ dl1rpna\_ d3ay7a1 dl1k2wa\_ dl1eq2a\_  
d2hrba1 d3ruaa\_ d2ew8a1 d4hwka\_ dl1xgka\_ d2bd0a1 dl1yo6a1 d2a35a1

d2ntva\_ d1vl8a\_ d1hdca\_ d4bkua\_ d2ag5a1 d2q45a\_ d1nffa\_ d4iy1a\_  
d1zbqa1 d1kewa\_ d1lek6a\_ d1ja9a\_ d2q46a2 d1iy8a\_ d1cyda\_ d2ptga\_  
d1hxha\_ d1uzma1 d3lyla\_ d4m89a\_ d3wyea\_ d2b11a1 d1w6ua\_ d1sb8a\_  
d2q2va\_ d4nr0a\_ d1e6wa\_ d2gasa\_ d3oiga1 d2bgka1 d1mxha\_ d1vl0a1  
d1rkxa\_ d1r6da\_ d1wmaa1 d1e7wa\_ d2c07a1 d1xkqa\_ d3tzha\_ d1g0oa\_  
d3lz6a\_ d1qyca\_ d1ledoa\_ d1gz6a\_ d1oc2a\_ d1t2aa\_ d1zema1 d2xoxa\_  
d1z45a2 d1geea\_ d3lt0a\_ d4e6pa\_ d2wyua\_ d1db3a\_ d4q9na\_ d1xhla\_  
d4o1ma\_ d1fmca\_ d2uvda\_ d2gdza1 d1uaya\_ d2z1ma\_ d2o23a2 d2fr1a2  
d2fr1a1 d1qsga\_ d1qyda\_ d4zjua\_ d2a4ka1 d1yb1a\_ d1wvga1 d1yxma1  
d3f4ba\_ d1mg5a\_ d1xg5a1 d1r55a1 d3gboa\_ d1kufa\_ d1buda\_ d4q11a\_  
d1quaa\_ d1yp1a\_ d1wnia\_ d2gfoa1 d1vjva\_ d2ayna1 d3nhea\_ d3nqyb\_  
d4gera\_ d1bqba\_ d1e2ta\_ d4c5pa\_ d2bsza1 d4bgfa\_ d1w4ta1 d1ex0a4  
d1g0da4 d2f4ma1 d1x3za\_ d3ulra1 d1g9ka2 d1k7ia2 d1t3ca\_ d1lepwa3  
d2a97a\_ d3fiea\_ g1e1h.1 d3ioqa\_ d1fh0a\_ d1o0ea\_ d1khqa\_ d1m6da\_  
d2cb5a\_ d1cs8a\_ g8pch.1 d1s4va\_ d2pnsa\_ d1vsna1 d1mira\_ d1iwda\_  
d2oula\_ d7pcka\_ d3bwka\_ d3bcna\_ d2p86a\_ d1pvja\_ d1pcia\_ d1gece\_  
d1deua\_ d4bs6a\_ d1xkga1 d1cqda\_ d1jqpa2 d2c0ya\_ d2bdza\_ d3p5ua\_  
d2o36a\_ d1ex4a2 d1c6va\_ d2jk6a2 d2jk6a1 d1fecal d1fecal d1lpfal  
d1lpfa2 d1xhca1 d1xhca2 d1dxla2 d1dxla1 d1gera2 d1m6ia2 d1onfa1  
d1onfa2 d3lada2 d3lada1 d1w4xa1 d1w4xa2 d1gesa2 d1mo9a1 d1xdia1  
d1f12a2 d1f12a1 d1fcdal d1fcdal d1h6va2 d1h6va1 d1mo9a2 d1gv4a2  
d1gv4a1 d2gv8a2 d2gv8a1 d1aoga1 d1aoga2 d1hyua1 d1ebda1 d1ebda2  
d3dk9a1 d1q1ra2 d1q1ra1 d1gesa1 d1w5qa\_ d2c1ha\_ d1ohla\_ d1l6sa\_  
d1zbfa1 d2z1ha\_ d2etja1 d3qioa1 d1j11a\_ d2e41a\_ d1j12a\_ d2l1sna1  
d1io2a\_ d1uaxa\_ d2yv0x\_ d1mu2a1 d1ekea\_ d1i39a\_ d1ps9a2 d1o94a2  
d1cjca1 d1pn0a1 d1reoa1 d1ju2a1 d2f5va1 d3c96a1 d2gmha1 d1pj5a2  
d1gpea1 d1o5wa1 d1n4wa1 d1k0ia1 d2dw4a2 d2ivda1 d2voua1 d1kdga1  
d1s5ja1 d2hbja2 d2igia\_ d1wlja\_ d1qhta1 d4dlea1 d1tgoa1 d2f96a1  
d3tr8a1 d3mxma\_ d1q8ia1 d1y97a1 d1w0ha\_ d1kfsa1 d2py5a1 d1noya\_  
d1yt3a3 d2guia\_ d3mwpa1 d4kb1a\_ d1x14a1 d3vsqa\_ d2gixa1 d1p7ba1  
d2v76a\_ d1wj1a1 d1aqca\_ d1qqga2 d1qqga1 d1ntva\_ d1n3ha\_ d4dbba\_  
d3f0wa1 d1p3ra\_ d1wgua1 d2cy4a1 d3hqca\_ d1wvha1 d1xr0b1 d1v58a1  
d1t3ba1 d4ilfa2 d4npba2 d1jmx4 d1jmx3 d1pbya4 d1k8ka2 d1k8ka1  
d3uleb1 d3i33a2 d3i33a1 d1bupa1 d1dkgd2 d1dkgd1 d4ci6a2 d1jcfal  
d4a2ba2 d2fxua1 d1yaga2 d1yaga1 d4cbua2 d1r7ha\_ d1faaa\_ d1wika1  
d1xfla\_ d1ttza1 d2f51a1 d1ti3a\_ d1nhoa\_ d1sena\_ d2i4aa\_ d1lep7a\_  
d1zmaa1 d1fo5a\_ d3lefa1 d3diea1 d2yana1 d1z6na1 d1oaza\_ d3zywa1  
d4aj8a\_ d1nm3a1 d4fiwa\_ d1wmja\_ d4hs1a1 d1iloa\_ d1xwaa1 d1wjka1  
d2vm1a\_ d1fb6a\_ d1gh2a\_ d1h75a\_ d1nw2a\_ d1kx5b\_ d3a6na\_ d4m6ba2  
d2nqbd\_ d3wkjd\_ d2yfwe\_ d4h9na\_ d5bnxa\_ d1kx5c\_ d3r45a\_ d1eqzb\_  
d4jjnb\_ d1f66c\_ d1eqza\_ d4wnnb\_ d1kx5a\_ d1u35c1 d1id3a\_ d2nqbc\_  
d1kx5d\_ d1ku5a\_ d1f1ea\_ d1b67a\_ d1tafa\_ d1bh9b\_ d1tafb\_ d1jfib\_  
d1h3ob\_ d2byka1 d1n1ja\_ d4g92b\_ d1bh9a\_ d1jfia\_ d1h3oa\_ d2bykb1  
d1n1jb\_ d1pd212 d1nhya2 d2a2ra2 d1k0dd2 d1f2ea2 d1gsua2 d1f3ba2



d2fhea2 d2pvqa1 d1tw9a2 d1oyja2 d1e6ba2 d1k0ma2 d3ik7a1 d4is0a1  
d1r5aa2 d1jlva2 d1m0ua2 d3gtub2 d1z9ha2 d1okta2 d1axda2 d2gsra2  
d1tu7a2 d1k3ya2 d1zgma1 d1gnwa2 d1gwca2 d2gsta2 d1glqa2 d1oe8a2  
d1pn9a2 d1v2aa2 d1fw1a2 d1duga2 d1y14b1 d2nn6i1 d1i94l\_ d2zjra2  
d1smxa\_ d2qamc2 d1hh2p1 d2r7da1 d1rl2a2 d1wfqa1 d3bzka4 d1x6oa2  
d3a0ja\_ d2j01d2 d2ja9a1 d4q15a\_ d1hr0w\_ d1luza\_ d2n3sa\_ d2vnud1  
d1h95a\_ d1go3e1 d2nn6h1 d1ne3a\_ d2mola\_ d1iz6a2 d1jjga\_ d1e3pa2  
d2ix0a3 d2ix0a2 d2lxja\_ d1ueba3 d1ueba2 d2z0sa1 d1u0la1 d2ix0a1  
d2eifa2 d2je6i1 d3i2za1 d2c35b1 d2ahob2 d1t9ha1 d3i4oa\_ d2qall1  
d1jt8a\_ d2nn6g1 d1g6pa\_ d3cama\_ d1i94q\_ d1c9oa\_ d1d7qa\_ d2ba0a1  
d2vnud2 d2vnud3 d1khia2 d2qalq1 d1wi5a1 d1xtda2 d1ny4a\_ d1qsaa2  
d4ilya\_ d1chka\_ d4olta\_ d1qqya\_ d1gd6a\_ d1f6ra\_ d2gv0a\_ d1iiza\_  
d2z2fa\_ d1j8xa\_ d1ghla\_ d1b9oa\_ d174la\_ d169la\_ d2o4wa\_ d1p37a\_  
d1k28a3 d1xjta1 d1jtma\_ d2f2qa\_ d4e97a1 d2pjsa1 d1k1la\_ d2i7ra1  
d1ecsa\_ d1xqaa1 d5cj3a1 d1npba\_ d2p7oa\_ d1r9ca\_ d1nkia\_ d1mpya2  
d1kw3b2 d1kw3b1 d4ghga1 d1tfza1 d3isqa1 d3isqa2 d1sqia1 d1sqia2  
d1lkda2 d1lkda1 d1mpya1 d1cjxa2 d1cjxa1 d1sp9b2 d1t47a1 d1t47a2  
d1f1ua2 d1sp8a1 d1sp8a2 d1f1ua1 d2bema\_ d1pama1 d1lea9c1 d1qhoa1  
d2fhfa2 d2fhfa1 d1k3ia1 d1j0ha1 d1csla1 d2bhua1 d1edqa1 d1f1sa2  
d1ut9a2 d1gvia1 d1txka1 d1s5ja2 d1qhta2 d4dlea2 d1tgoa2 d3py8a2  
d1q8ia2 d1kfsa2 d2py5a2 d1d5aa2 d1qsta\_ d2beia1 d4m3sa\_ d1u6ma1  
d1ygha\_ d1yk3a1 d3dr6a\_ d1xmta\_ d1z4ea1 d2ge3a1 d1bo4a\_ d2fiaa1  
d2jdca1 d1y9wa1 d3to7a\_ d1wwza1 d2f14a1 d2ozua1 d2b5ga\_ d2cy2a1  
d2p0wa\_ d1cm0a\_ d4pswa\_ d1yrea1 d1yr0a1 d1m4ia\_ d2gana1 d1yvka1  
d1ghea\_ d2g3aa1 d1y7ra1 d2euia1 d1q2ya\_ d2fsra1 d1xeba\_ d2ae6a1  
d1cjwa\_ d1qsma\_ d2aj6a1 d1y9ka1 d1i12a\_ d1vkca\_ d2atra1 d1n71a\_  
d2d4pa1 d2fiwa1 d2fe7a1 d1tiqa1 d2ou2a\_ d1yx0a1 d2fcka1 d1p0ha\_  
d2j8ma\_ d2pq8a\_ d1z4ra1 d1s3za1 d1ufha\_ d2hqya1 d2hqya2 d1lrza2  
d1ne9a1 d1lrza3 d1xvqa1 d1pn0a2 d3hy2a\_ d2cvba1 d1o8xa\_ d1lu4a\_  
d1we0a1 d2bmxa1 d2a4va1 d1psqa\_ d1xiya1 d1q98a\_ d1n8ja\_ d1zofa1  
d2ggta\_ d3tjja\_ d4je1a1 d1o73a\_ d3s9fa\_ d2zcta\_ d1qmva\_ d1jfua\_  
d2b1ka\_ d5dvba1 d2b5xa1 d2v2ga\_ d1st9a\_ d3tb2a\_ d4llra\_ d4fh8a1  
d1e2ya\_ d1knga\_ d2h30a\_ d1i5ga\_ d2z9sa\_ d2f8aa1 d1tp9a1 d2b7ka\_  
d1nm3a2 d3hvva\_ d2wfca1 d4kcea\_ d1xvwa1 d4gqca1 d3qpma\_ d4k1fa\_  
d1zsoa1 d1gp1a\_ d1prxa\_ d4od7a1 d1z6ma1 d4mcua1 d4dvca1 d1r4wa\_  
d3l9sa\_ d3rppa\_ d2qked\_ d4ksoa\_ d1t4za1 d1wwja\_ d2m5ta\_ d1cqqa\_  
d1wqsa\_ d5bpea\_ d2ipha\_ d1lvoa\_ d2bhga1 d3tnta\_ d3sjia\_ d3d23a1  
d2fyqa\_ d3tloa\_ d3zvea1 d3q3ya1 d4asha1 d2phla2 d2phla1 d1fxza2  
d1fxza1 d1uija1 g1dgw.1 d2v09a\_ d1uika2 d1uika1 d1dgwa\_ d1e88a1  
d1l6ja5 d1l6ja4 d1eaka4 d1eaka3 d1l6ja3 d1h8pa2 d1ra6a\_ d1muka\_  
d3gsza\_ d1khva\_ d1te9a\_ d2xwha\_ d3uqsa\_ d3hkwa\_ d3n6ma\_ d2cjqa\_  
d2xyma\_ d1teba\_ d1te8a\_ d1s48a\_ d1u09a1 d4wfxa\_ d3tyqa\_ d2pgga1  
d2h1ia1 d2r8ba1 d3b5ea1 d3cn9a\_ d1lgya\_ d4l3wa\_ d1llfa\_ d1lukca\_  
d1cr6a2 d1t61c1 d2ftba\_ d1pmpa\_ d2rcqa1 d1fdqa\_ d4lkpa\_ d1sa8a\_

d1vyfa\_ d1lpja\_ d3vg7a1 d4azqa1 d1o8va\_ d5bvqa\_ d1p6pa\_ d2qo4a\_  
d1opba\_ d1yiva1 d1o1va\_ d4bvma1 d4tkba\_ d4i3ba\_ d1bwya\_ d1ftpa\_  
d1ggl\_a\_ d4gkca\_ d1cbia\_ d3p6da1 d1kqwa\_ d2a0aa1 d3zxxha\_ d1cgl\_a\_  
d1rm8a\_ d1eaka2 d1hy7a\_ d2jsda\_ d1cxva\_ d1hv5a\_ d1i76a\_ d3p0ya1  
d1igra1 d1igra2 d1n8yc2 d1n8yc1 d1m6ba2 d1m6ba1 d4dv8a2 d2bk7a\_  
d3fjua\_ d1z5ra1 d1kwma1 d1uwya2 d1jqga1 d2c1ca1 d1dtda\_ d1h81a2  
d2tbvc\_ d1c8nc\_ d1x36a\_ d1smvc\_ d1ng0c\_ d4sbvc\_ d1f2nc\_ d1cixa\_  
d1y29a\_ d1v7fa\_ d2jtba\_ d1d1ha\_ d1g9pa\_ d1lupa\_ d1qk7a\_ d1mb6a\_  
d2a2va\_ d1niya\_ d1hvwa\_ d2mpqa\_ d1ie6a\_ d1kqha\_ d1la4a\_ d2mxoa1  
d1d10a\_ d1koza\_ d1qk6a\_ d1emxa\_ d1lqra\_ d1c6wa\_ d1rmka\_ d1ixta\_  
d1eyoa\_ d1fu3a\_ d1g1pa\_ d1f3ka\_ d1fyga\_ d1rypd\_ d1rypc\_ d3unfk\_  
d1rypa\_ d1j2pa\_ d1irui\_ d1j2qh\_ d3unfh\_ d1m4ya\_ d1rypb\_ d1irul\_  
d1irug\_ d1iru2\_ d1q5rh\_ d1rypg\_ d1g3ka\_ d1iruf\_ d1q5qa\_ d1e94a\_  
d1irub\_ d1ryph\_ d3ty6a\_ d1iruj\_ d1iruk\_ d1rype\_ d1irud\_ d1irue\_  
d3mi01\_ d1rypf\_ d1iruh\_ d2z3ba\_ d1iruc\_ d3mka2\_ d1iru1\_ g1gk9.1  
g1cp9.1 g1e3a.1 d1mqta\_ d1d4m3\_ d1fmd3\_ d2mev1\_ g1aym.1 d1ev13\_  
d4q4w1\_ d1r1a3\_ d2x5ia\_ d1rhi1\_ g1r1a.1 g1d4m.1 g1rhi.1 d1b35b\_  
d1lopa\_ d1tme1\_ d4iv1a\_ g1pvc.1 g1fpn.1 d1fpn1\_ d4gb31\_ d1d4m1\_  
d1fmd1\_ d1ev11\_ d2wzr3\_ g1cov.1 d1qqp3\_ g1fmd.1 d2x5ic\_ d1rhi3\_  
g1oop.1 d1hxs1\_ d1fpn3\_ d1bev1\_ g2mev.1 d1eah3\_ d1aym1\_ d1pvc3\_  
d1qqp1\_ d1zba3\_ d1h8ta\_ d3vbhc\_ g1b35.1 g1bev.1 d1hxs3\_ g1ev1.1  
d1bev3\_ g1tmf.1 d1tmf1\_ d1b35a\_ d2mev3\_ g1eah.1 g1h8t.1 d1eah1\_  
d4q4w3\_ d1r1a1\_ d1aym3\_ d1pvc1\_ d1zba1\_ d1h8tc\_ d1loopc\_ d1tme3\_  
g1qqp.1 d4iv1c\_ g1tme.1 d1p8ba\_ d4w9ta\_ d1jvna1 d4x2ra1 d1qo2a\_  
d4axka1 d1thfd\_ d1h5ya\_ d4u28a\_ d2y88a\_ d4wd0a\_ d1vzwa1 d3exra\_  
d2ffca1 d2fdsa1 d3n3ma1 d2czda\_ d1q6oa\_ d2yyua\_ d1vqta1 d1dbta\_  
d3ldva1 d4lt9a1 d3tc7a1 d3hoja\_ d1i4na\_ d3vnda\_ d3n18a1 d1geqa\_  
d3naval d1v5xa\_ d4a2ra1 d3tc6a1 d1ujpa\_ d4ijba\_ d1xcfa\_ d1vc4a\_  
d1rd5a\_ d1qopa\_ d3b5va\_ d2r80b\_ d1cqxa1 d1cg5a\_ d1gcvb\_ d3boma\_  
d2h8fb\_ d2raoa\_ d3bj1a\_ d4hrrb\_ d2r50a\_ d3d1kb\_ d2aa1b1 d3zhwa\_  
d3hf4b\_ d3gdja\_ d1jebb\_ d3bj1b\_ d1x9fb\_ d1wmub\_ d1gcva\_ d3bcqb\_  
d3d4xb\_ d1gvha1 d2dc3a\_ d3hf4a\_ d4yu3a\_ d3k8ba\_ d1qpwb\_ d2r80a\_  
d3bcqa\_ d1v4wa\_ d3wtgb\_ d1j17a\_ d4esaa\_ d3d1ab\_ d1fsla\_ d4h21a\_  
d1v4wb\_ d1mwca\_ d1vhba\_ d1jeba\_ d1spgb\_ d1h97a\_ d1q1fa\_ d1tu9a1  
d3d1aa\_ d1hdsb\_ d3hyub\_ d2zfbb\_ d3fs4a\_ d1oj6a\_ d1shrb\_ d4h21b\_  
d4yu3b\_ d1spga\_ d3hrwa\_ d3qqra\_ d3at5a\_ d4wchd\_ d3hyua\_ d1cg5b\_  
d1uc3a\_ d1hbra\_ d2raob\_ d1outb\_ d4esab\_ d3gdjb\_ d3qqqa\_ d1x9fc\_  
d3vrf\_a\_ d1litha\_ d3mkba\_ d3d4xa\_ d3mjpa\_ d1j16a\_ d3fh9a\_ d1outa\_  
d2dc3b\_ d1lit2a\_ d3eoka\_ d3g46a\_ d1qpwa\_ d3vrfb\_ d1ch4a\_ d1x9fd\_  
d1hdsa\_ d2zfba\_ d3mkbb\_ d1or4a\_ d3wtga\_ d1a4fa\_ d3fh9b\_ d3bomb\_  
d3cy5a\_ d3at5b\_ d1x9fa\_ d2oifa\_ d4lmbx\_ d1cpcb\_ d3v57a\_ d1kn1a\_  
d1cpca\_ d4f0ta\_ d2vjha\_ d4po5b\_ d1eyxa\_ d1alla\_ d4f0tb\_ d1b8db\_  
d4h0mb\_ d1b33a\_ d2vjhb\_ d4lm6b\_ d2vmlb\_ d1allb\_ d2vjta\_ d3dbja\_  
d2vmla\_ d2vjtb\_ d4f0ub\_ d1f99b\_ d4rmpa1 d1liaa\_ d1eyxb\_ d2uulb\_

d4lmsb\_ d4f0ua\_ d2bv8a\_ d1f99a\_ d2bv8b\_ d2c71b\_ d3dbjb\_ d4rmpb1  
d1b8da\_ d4h0ma\_ d3v57b\_ d1kn1b\_ d1liab\_ d2uula\_ d2j96a\_ glgxs.1  
g1wht.1 d1azwa\_ d1mtza\_ d2xqfa\_ d1lea5a\_ d1f6wa\_ d1dx4a\_ d1qe3a\_  
d1k4ya\_ d4qwwa\_ d2ha2a\_ d1r88a\_ d1sfra\_ d1f0na\_ d4qeka\_ d3c8da2  
d2pbla1 d1jkma\_ d1jjia\_ d1lzl1a\_ d1jjfa\_ d2i49a\_ d1nnfa\_ d1xvxa\_  
d1ursa\_ d1h3da1 d1iuda\_ d4m1va1 d1twya\_ d3e13x\_ d2nxoa1 d4pfua\_  
d3ttma\_ d1elja\_ d2qmwa1 d1us5a\_ d1y3na1 d1jeta\_ d1ugwa\_ d4f19a1  
d2esna2 d3thia\_ d3fasa1 d2uyeb\_ d2xwva1 d1r91a\_ d2fyia1 d1pb7a\_  
d2ozza1 d1sw5a\_ d1nh8a1 d1vr5a1 d2g29a\_ d1xs5a\_ d3lswa\_ d2z23a\_  
d3w9va\_ d3tcha\_ d1q35a\_ d1z7me1 d3q27a\_ d1p99a\_ d1ve4a1 d2i6ea1  
d4mcoa1 d4n8ya\_ d1eu8a\_ d1zbma1 d1hsla\_ d1ixca2 d1j1na\_ d1xvya\_  
d1y9ua\_ d2z22a1 d1xoca1 d4oera\_ d1wdna\_ d5f1qa1 d1xt8a1 d1i6aa\_  
d4gwoa\_ d4igta1 d1pc3a\_ d4mmpa1 d1o63a\_ d2czla1 d2onsa2 d4mija1  
d2qvba\_ d2v9za\_ d4kafa1 d4iuua3 d4bvva\_ d5hpga\_ d3k65a\_ d1ki0a3  
d1ki0a2 d1ki0a1 d1a0ha1 d1pmla\_ d3sp8a3 d2feba1 d1mdwa\_ d1qxp4  
d1ziva1 d1zcmal d1f74a\_ d3l21a\_ d2e1da\_ d1to3a1 d1w3ia\_ d1sfla\_  
d1n7ka\_ d1vcva1 d4imea\_ d1wa3a\_ d2ocza1 d1f2ja\_ d3m16a\_ d2yxga\_  
d1ub3a\_ d3a5fa\_ d1fbaa\_ d1l6wa\_ d1xfba1 d1wx0a1 d1vpxa1 d1ojxa\_  
d1mxsa\_ d2a4aa1 d1xkya1 d3cq0a1 d3s1xa\_ d1f05a\_ d1fdja\_ d3cpra1  
d4d2ja\_ d1yloa2 d1y7ea2 d1y0ya3 d1lfwa1 d1vixa1 d1fnoa4 d1vhoa2  
d1ysja1 d1vhea2 d1z21a1 d2fvga2 d1vgya1 d1r3na1 d2grea2 d1xmba1  
g1q7l.1 d1rtqa\_ d3rp2a\_ glucy.1 d1fuja\_ d2zchp\_ d3w94a\_ d1si5h\_  
d1lo6a\_ g2pka.1 d1cgha\_ d1kigh\_ d1a5ia\_ d3s9ba\_ d1hj8a\_ d1ao5a\_  
d2anya\_ d1q3xa1 d1gvza\_ d1azza\_ d4gsoa\_ d2f91a1 d1iaua\_ d1gdna\_  
d1eufa\_ g1fiw.1 d1eq9a\_ d4nfea\_ d2rdla\_ d1spja\_ d1elva1 d1a7sa\_  
d1ekbb\_ d1pfxc\_ d1yc0a\_ d2aiqa\_ g1fiz.1 d1fi8a\_ d4k60a\_ d4dgja\_  
d1mzaa\_ d1op0a\_ d3tjva\_ d1pytd\_ d1sgfg\_ g1gg6.1 d2eeka\_ g1rtf.1  
d1a0ja\_ d3g01a\_ d1pytc\_ d4e7na\_ d1ddja\_ d1z8ga1 d2hlca\_ d1npma\_  
d1brup\_ g1jou.1 d1sgfa\_ d1autc\_ g2hnt.1 g1kdq.1 d1orfa\_ d3s69a\_  
d4crga\_ d1fxya\_ d1bqya\_ d1svpa\_ d3su6a1 d1cula1 d4agka\_ d1vcpa\_  
d1q31a\_ g1n1l.1 d3e90b\_ d1ep5a\_ d3u1jb\_ d1dzka\_ d4tlja\_ d2a2ua\_  
d4wfva\_ d3tlda\_ d4iixa\_ d3zq3a\_ d2nnda\_ d1i4ua\_ d1kxoa\_ d1bbpa\_  
d1kt7a\_ d1exsa\_ d3s26a1 d1lf7a\_ d1qfta\_ d4gh7a\_ d1z24a1 d1qabe\_  
d1xkia\_ d1ew3a\_ d3bx7a\_ d4iawa1 d1n0sa\_ d1gkab\_ d3kzaa\_ d2k23a\_  
d2l9ca1 d2joza1 d1gm6a\_ d3kffa\_ d3saoa1 d1e5pa\_ d1yupa1 d1iua\_  
d3lgia\_ d3i77a\_ d2z9ia2 d4nsva\_ d1lcya2 d4jcna\_ d1agja\_ d1os8a\_  
d1hpga\_ d1p3ca\_ d1l1ja\_ d1qtfa\_ d1e69a\_ d1mv5a\_ d3g60a4 g1ii8.1  
d1ewqa2 d1ji0a\_ d1v43a3 d2wmfa1 d1vpla\_ d1g2912 d4a82a2 g1f2t.1  
d2d62a1 d3tuic1 d2bbsa1 d3g60a3 d2ixea\_ d1g6ha\_ d1sgwa1 d2qi9c\_  
d3rlfa1 d3b60a1 d3d31a2 d2pzea1 g1xew.1 d1jj7a\_ d1oxxk2 d2onka1  
d1wlwa\_ d1iwea\_ d1qf5a\_ d1vmaa2 d1nija1 d1np6a\_ d2p67a1 d3ihla\_  
d1ls1a2 d1slma2 d1iona\_ d2v40a\_ d1dj3a\_ d3hida\_ d2vo1a1 d2g0ta1  
d1vcoa2 d1j8mf2 d1g3qa\_ d1xjca\_ d1p9ba\_ d1qzxa3 d1ihua2 d1ihua1  
d2qm8a\_ d1dj2a\_ d4ioja\_ d1cp2a\_ d1yrba2 d1hyqa\_ d3gqba2 d1skye3

d1xp8a1 d1tf7a2 d1tf7a1 d1ye8a1 d1skyb3 d2qe7d2 d4blta\_ d4huta\_  
d3l1daa2 d4hyya\_ d2i3ba1 d1crla\_ d3j9tb2 d3ntua2 d1vdza1 d2z43a\_  
d1e9ra\_ d1nlfa\_ d3ziaa2 d1n0wa\_ d1g6oa\_ d3ziad2 d3j9ta2 d3gqbb2  
d1gkub1 d1gkub2 d4ok5a1 d2bmfa1 d2bmfa2 d1yksa1 d1yksa2 d1jr6a\_  
d2qeqa1 d2j1qa1 d1a1va2 d1eh3a\_ d3skpa\_ d1dtza2 d1ieja\_ d1jnfa2  
d1ce2a1 d1jnfa1 d1b1xa2 d1b1xa1 d1jw1a1 d1jw1a2 d1ryoa\_ d1h76a1  
d1h76a2 d1c4oa1 d2p6ra3 d2p6ra4 d1oywa2 d1oywa3 d1wrba1 d1w36b2  
d1w36b1 d1c4oa2 d3bora\_ d1t6na\_ d2eyqa5 d2eyqa3 d2eyqa2 d2zu6a2  
d1veca\_ d1uaaa1 d1w36d1 d2g9na1 d1z3ix2 d2rb4a\_ d1hv8a1 d1hv8a2  
d1t5ia\_ d1w36c2 d2j0sa2 d2j0sa1 d1fuka\_ d3hjha1 d1z5za1 d1qdea\_  
d1z63a1 d1s2ma2 d1s2ma1 d1wp9a1 d1wp9a2 d1gm5a3 d1gm5a4 d3dina4  
d3dina3 d1q0ua\_ d1w36c1 d1z3ix1 d1nkta3 d1uaaa2 d1w36d2 g1qhh.1  
d2fwra2 d2fwra1 d3q3ma\_ d1za0a1 d1mxra\_ d2inca\_ d1jk0a\_ d2incb\_  
d1mhyb\_ d3hf1b\_ d1mtyb\_ d1r2fa\_ d2uw1a\_ d1mhyd\_ d3n37a\_ d1afra\_  
d1oquc\_ d1syya\_ d1mtyd\_ d2o1za\_ d1uzra\_ d1smsa\_ d2fkza\_ d1zujal  
d1s3qa1 d2fjca1 d1z6om1 d1veia\_ d4dyya\_ d1jiga\_ d3gvya\_ d2pyba\_  
d4cy9a1 d3bvfa1 d1r03a\_ d2cf7a\_ d1nf4a\_ d1zs3a1 d4iwka\_ d3ka8a\_  
d3np0x\_ d1n1qa\_ d11b3a\_ d4e6ka\_ d1z6oa1 d2fzfa1 d4dyua\_ d3ge4a\_  
d1jgca\_ d4am4a\_ d2z6ma\_ d1ji5a\_ d1vlga\_ d1lkoa1 d1krqa\_ d3qz3a\_  
d1o9ra\_ d2ffxj\_ d1euma\_ d1yv1a1 d2v2pa\_ d1j30a\_ d4di0a\_ d1dpsa\_  
d1oewa\_ d2qzxa\_ d2asia\_ d1psoe\_ d1miqa\_ d1smra\_ d2h6ta\_ d1pfza\_  
d1lizda\_ d3hd8a\_ d1j71a\_ d1dpja\_ d4aa9a\_ d1t6ex\_ g1b5f.1 g1lya.1  
g1htr.1 d1qdma2 d1bxoa\_ d1wkra\_ d1tzsa\_ d1libqa\_ d2qzwa\_ d1bdqa\_  
d3ggta\_ d3ixoa\_ d1mrxa\_ d2haha\_ d1tw7a\_ d4njsa\_ d1sgua\_ d2p3da\_  
d1nsoa\_ d3d3ta\_ d2rkfa\_ d1c6ya\_ d2rspa\_ d3ogpa\_ d3ekwa\_ d2o4na\_  
d2j9ja\_ d1baia\_ d3ggua\_ d3l3za\_ d4npua\_ d4j55a\_ d2r8na\_ d2fxda\_  
d2p3ca\_ d4dqea\_ d3ttpa\_ d3t3ca\_ d2p3aa\_ d2hc0a\_ d2fdda\_ d3mwsa\_  
d1k8rb\_ d1wgra1 d1ef5a\_ d1wfyal d1e8ya3 d1wgya1 d1l1fda\_ d2cs4a1  
d1wxma1 d2byea1 d3kh0a1 d2byfa1 d1wxaa1 d1wgda1 d1wggal d4q5eb\_  
d1wjna1 d1se9a\_ d3n3kb\_ d1wz0a1 d1we6a1 d2m0xa\_ d2gbka\_ d3rt3b1  
d1wh3a1 d1sifa\_ d2ekek2 d4ii2b1 d4hk2a1 d1c3ta\_ d1m94a\_ d1wghal  
d1ttna1 d1wx8a1 d3v6cb1 d2ma9b\_ d4i61b1 d1bt0a\_ d2jvca1 d1iyfa\_  
d2k1fa\_ d1wxva1 d1wf9a1 d1t0ya\_ d2io0b2 d1x1ma1 d2gbma\_ d1zw7a1  
d2m17a\_ d1ud7a\_ d1we7a1 d2l1wpa\_ d2gbja\_ d1wjua1 d1v6ea1 d1v86a1  
d4eewa\_ d1w1aa1 d4icva\_ d4gu2a\_ d1wx7a1 d1wy8a1 d4hjka1 d2faza1  
d1v5oa1 d3ruib\_ d3waob\_ d2r2qa1 d3m95a\_ d3wana\_ d2a13a1 d2cr5a1  
d1wj4a1 d1s3sg\_ d1g66a\_ d1qoza\_ d5ajha1 d4lu0a\_ d1of8a\_ d3unda1  
d3e9aa1 d1vr6a2 d1n8fa\_ d2qkfa\_ d1d9ea\_ d2bcgg1 d2bcgg2 d1d5ta1  
d1um8a\_ d1lixza\_ d1qvra2 d1qvra3 d1sxjc2 d1jr3d2 d2p65a\_ d1l8qa2  
d1g8pa\_ d3hu3a3 d1sxjd2 d1njfa\_ d1in4a2 d1sxja2 d1tuea1 d2ce7a2  
d1w5sa2 d1sxjb2 d1d2na\_ d1ny5a2 d1ofha\_ d2gnoa2 d2a5yb3 d1fnna2  
d1u0ja1 d1lv7a\_ d1iqpa2 d2fnaa2 d1ixsb2 d4gita\_ d1sxje2 d1g41a\_  
d2e3fa\_ d2e3ea\_ d2l1lda\_ d2ny8x\_ d2e3ga\_ d2ny9x\_ d2nz3a\_ d2lj7a\_  
d2m8bb1 d2kyqa\_ d3psma\_ d1jkza\_ d1jxca\_ d2g11a\_ d1ugla\_ d4uj0a\_

d2k4ua\_ dlhp2a\_ d2lu9a\_ dlbaha\_ d2meoa1 dlwm7a\_ dlhlya\_ dln8ma\_  
dljlza\_ dlwpda\_ dlc55a\_ dlpvza\_ dlwt7a\_ dlrjia\_ dlwz5a\_ dlm2sa\_  
dlpjva\_ dlc49a\_ dlqkya\_ d2ktca1 dlwmta\_ dlj5ja\_ dlr1ga\_ dlt0za\_  
d2i6la\_ dlt1ta\_ dlsn4a\_ dlkv0a\_ d2lkba\_ dlnpia\_ dlwwna\_ dlpe4a\_  
d2kbka\_ d2li7a\_ dl djta\_ d2kbha\_ dl dq7a\_ dlsega\_ dlomya\_ dlzywa1  
dln9wa1 dle1oa1 dlc0aa1 dlb8aa1 dl10wa1 d3a74a1 dleova1 dlbvsa3  
dlixra2 dliyjb4 dliyjb5 dliyjb3 dlo7ia\_ d4ipca1 dlx3ea\_ d4apva\_  
dljb7a1 dljb7a2 dljb7a3 d3kdfa\_ dlue1b\_ dlwjja1 d3eiva\_ dlxjva2  
dlxjva1 d2ccza2 dlse8a\_ dl1loc\_ dljb7b\_ dlqvca\_ d3ulla\_ dlqzga\_  
dlm1ua4 dlm1ua5 dlm1ua3 d3g48a1 dlgd7a\_ dljjcb3 dlpyba\_ d3ubub\_  
dlegia\_ dlqo3c\_ dlv7pa\_ dltdqb\_ d3ubua\_ dlc3ab\_ dlh8ua\_ d3bx4b\_  
dlt8ca1 dl sb2a1 dlqdda\_ d2ziba1 d3cada\_ dlbyfa\_ dlj34b\_ dljwia\_  
dljzna\_ dlc3aa\_ dloz7b\_ dlwmza\_ d3bdwb\_ dlhq8a\_ dl fifa1 dldv8a\_  
d3hupa\_ dlwk1a1 dlumra\_ d2afpa\_ d3bx4a\_ dl gz2a\_ dlsl6a\_ dl v7pb\_  
d3g8ka\_ dl ixxa\_ dlj34a\_ dljwib\_ dlgl1sa1 dly17a1 dlja3a\_ dl fvub\_  
d3bdwa\_ dl sb2b1 dl fvua\_ dlumrc\_ dloz7a\_ d4m17a\_ d3cfwa1 dlypqa1  
dlgl1ta1 d3fd4a\_ d3l9jc\_ d4dn8a1 dl v4lb\_ dlrd11\_ d2msba\_ dldgsa2  
dlfvial dlpl6a1 dlx9na2 dl pfsa\_ d2a1ka\_ dlje5a\_ dlrpma\_ dlyfoa\_  
dl18ka\_ d2ooqa1 dl g4us2 dl p15a\_ dl1lara2 dl1lara1 dlwcha\_ d2fh7a2  
d2fh7a1 dlohea1 d2f4da\_ dlrxda\_ d2hxpa\_ dl xria\_ dl d5ra2 dl fpza\_  
d3ezza\_ d4y2ea\_ dli9sa\_ d3azya\_ d3wvja\_ dlupsa1 dlajoa\_ d2hyka\_  
dlajka\_ d2vy0a\_ d3o5sa\_ d3d6ea\_ d3atga\_ dl dypa\_ dlumza\_ d3i4ia\_  
dlc1la\_ d4lbqa\_ dl a78a\_ dl slta\_ d4no4a\_ d3zsja\_ d3duia\_ dl g86a\_  
dlis3a\_ dlqmja\_ dltdha3 dlq3ba3 dlee8a3 glqmo.1 gl1en.1 d3zyra\_  
dlfnya\_ dl n47a\_ g2ltn.1 dlavba\_ d3usua\_ dl dhkb\_ dl f9ka\_ dl ukga\_  
dlg8wa\_ dl g9fa\_ dlwbfa\_ d3wcsa\_ dl g7ya\_ glloe.1 dl mvqa\_ dl hqla\_  
dlv6ia\_ dl dbna\_ dl fx5a\_ d4l8qa\_ dl ioaa\_ d3n35a\_ d3h33a\_ dl rwja\_  
dl9hca\_ dl os6a\_ d3bxua\_ d3h4na\_ dl i77a\_ d3caoa\_ d2ctha\_ dl duwa\_  
dl ofwa\_ d2e84a\_ dl hh5a\_ dlgyoa\_ d3h34a\_ dl dszb\_ dl a6ya\_ d3cbba\_  
dl ynwa1 dl r4ia\_ dl hcqa\_ d2hana\_ d2hanb\_ d2enva1 dl kb4b\_ d2n1lb\_  
dl lola\_ dl cita\_ d2dara2 d2dara1 dl wyha2 d2dloa2 dl rutx4 dl rutx3  
d2cuqa2 dl x4la2 dl x4la1 dl x3ha2 dl x3ha1 d2d8za1 dl x61a2 dl x6aa1  
dl x6aa2 d2cora2 d2cora1 dl v6ga1 dl v6ga2 d2d8za2 dl x64a1 dl x64a2  
dl b8ta1 d2co8a1 dl x63a2 d2dj7a2 d2dj7a1 d2cu8a2 d2cu8a1 dl g47a2  
dl g47a1 dl j2oa1 dl wyha1 d2dloa1 dl wiga1 dl wiga2 d2cupa2 d2cupa3  
dl x68a1 d2d8ya2 d2d8ya1 dl m3va2 dl x62a1 dl x68a2 dl x61a1 dl b8ta3  
d2d8xa2 d2d8xa1 dl x4ka1 dl x4ka2 d2cuqa1 dl m3va1 d2co8a2 dl j2oa2  
dl x63a1 d2cura1 d2cura2 dl x62a2 d2aq2b1 dl ck1a1 dl enfa1 dl i4pa1  
dl v1oa1 dl et9a1 dl esfa1 d2g9hd1 d4ohja1 dl klud1 dl eu3a1 dl ty0a1  
dl fnua1 dl r0ka3 dl vkoa2 dl vm6a2 d3qvsa2 dl gr0a2 dl p1ja2

**Family-20 (b.1.1.4)**

**Positive dataset contains 21 protein sequences.**

d2cqva1 d2k1ma\_ d3qp3a1 dlxmwa2 d2otpa2 d2dava1 dlwaaa\_ dlx44a1  
d3b5ha2 d3h8na2 d3h8na1 dlpd6a\_ d3cx2a\_ d3b5ha1 dlxiwb\_ dlxaau\_

d2ifga1 d2gw5a2 d1sy6a1 d1xiwa\_ d2c9aa1

**Negative dataset contains 3151 protein sequences.**

d1m32a\_ d1libja\_ d1c7na\_ d1liuga\_ d4q75a\_ d2bkwa1 d1t3ia\_ d1n8pa\_  
d1qz9a\_ d1jff9a\_ d1leg5a\_ d1p3wa\_ d3kgwa\_ d1c11a\_ d2ctza1 d1vjoa\_  
d2rfva\_ d1gc0a\_ d1cs1a\_ d1d2fa\_ d2ch1a1 d1qgna\_ d1pffa\_ d1elua\_  
d1ax4a\_ d1c7ga\_ d2v1pa1 d2ez1a\_ d1u08a\_ d1lc5a\_ d1b5pa\_ d2ay1a\_  
d1bw0a\_ d3pd6a\_ d7aata\_ d2csta\_ d1j32a\_ d1fg7a\_ d4wlha\_ d1v2da\_  
d1gdea\_ d1m6sa\_ d1v72a1 d1svva\_ d1ajsa\_ d1wsta1 d2f8ja2 d11k9a\_  
d1vp4a1 d1xi9a1 d2gb3a1 d1yaaa\_ d1xkta1 d2hfka\_ d1jmkc\_ d5d3ka\_  
d2cfba1 d1dfoa\_ d1o69a\_ d1bj4a\_ d3k28a\_ d2bwpa\_ d3lg0a\_ d2fnua\_  
d3ou5a\_ d1z7da1 d1b9ha\_ d1iaya\_ d4msoa\_ d1bs0a\_ d1s0aa\_ d1sffa\_  
d3tqxa\_ d3qboa\_ d3pgya\_ d1bjna\_ d2dkja\_ d1ejia\_ d1vefa1 d4wxga\_  
d3bs8a\_ d3gbxa1 d1w23a\_ d3lgia\_ d3i77a\_ d2z9ia2 d4nsva\_ d11cya2  
d4jcn\_ d1agja\_ d1os8a\_ d1hpga\_ d1p3ca\_ d111ja\_ d1f56a\_ d1bypa\_  
d1azca\_ d1ws8a\_ d3u25a\_ d1cuoa\_ d1id2a\_ d1rkra\_ d2iaac\_ d4dp1x\_  
d1nwpa\_ d2gima\_ d2i7sa\_ d1qhqa\_ d1gyca3 d1hfua2 d1kbva1 d1kbva2  
d1sdda1 d1sdda2 d1gyca1 d1gyca2 d1mzya1 d2bw4a1 d1aoza1 d1aoza3  
d1aoza2 d1kyaa2 d1kyaa3 d1kyaa1 d1mzya2 d4e9sa1 d1sddb1 d1sddb2  
d1hfua1 d1hfua3 d1oel1a2 d1oel1a1 d1v10a2 d1v10a3 d1v10a1 g1f8v.1  
d1novc\_ d2bema\_ d1pama1 d1lea9c1 d1qhoa1 d2fhfa2 d2fhfa1 d1k3ia1  
d1cxl1a1 d2bhua1 d1edqa1 d1f1sa2 d1lut9a2 d1gvia1 d1txka1 d4alac\_  
d1rera1 d1s6na\_ d3uzqb\_ d2ph1a2 d2ph1a1 d1fxza2 d1fxza1 d1lrha\_  
d1uija1 g1dgw.1 d2v09a\_ d1uika2 d1uika1 d1dgwa\_ d1ds6b\_ d1fstb\_  
d1ex0a1 d1g0da1 d1tafa\_ d1bh9b\_ d1tafb\_ d1jfib\_ d1h3ob\_ d2byka1  
d1n1ja\_ d4g92b\_ d1bh9a\_ d1jfia\_ d1h3oa\_ d2bykb1 d1n1jb\_ d1ydwa2  
d2nvw2 d1zh8a2 d1qkia2 d1xeaa2 d1t1ta2 d1e3oc2 d1lic8a2 d2ovga\_  
d1sq8a\_ d1rzsa\_ d3kz3a\_ d3orca\_ d3gpdg2 d2q49a2 d1hdgo2 d2g17a2  
d2cvoa2 d2czca1 d3pwka2 d1obfo2 d1i32a2 d1zyao2 d2pkqo2 d1b7go2  
d2hjsa2 d1cf2o2 d1vkna2 d1nvmb2 d1ux8a\_ d1dlya\_ d4i0va\_ d2bkma\_  
d1dlwa\_ d2bmma\_ d2msya\_ d2djoa1 d2r5za\_ d1au7a1 d1f43a\_ d21mda1  
d1akhb\_ d1s7ea1 d3nara\_ d1zq3p1 d2craa1 d1mija\_ d4uuta\_ d3a01a\_  
d1x58a1 d3rkqa1 d3cmya1 d2cqxa1 d2da6a1 d1e3oc1 d1fjla\_ d1mh3a1  
d1ig7a\_ d1x41a1 d1wh7a1 d1gt0c1 d2mw8a\_ d1lfup\_ d1x2ma1 d1b72a\_  
d1wi3a1 d1wjha1 d1x2na1 d1mnmc\_ d2cuea1 d3k2aa\_ d2hosa\_ d2jwta2  
d1pufa\_ d1oetc1 d2hi3a\_ d1b8ia\_ d4j19a\_ d3lnqa\_ d1wh5a1 d1b8ib\_  
d1fexa\_ d2cqra1 d1guua\_ d1ug2a1 d2cqqa1 d2ajea1 d4a69c\_ d1h8ac1  
d2crga1 d2iw5b1 d1xc5a1 d1ofcx1 d2cu7a1 d1wgxa1 d2cjja1 d2ckxa1  
d1hcra\_ d1tc3c\_ d1gdt1a1 d1u78a2 d1xg1a1 d1itya\_ d2iu5a1 d1zk8a1  
d2g7sa1 d2fd5a1 d2np5a1 d1z0xa1 d2id6a1 d2d6ya1 d2i10a1 d1vi0a1  
d2oi8a1 d3c07a1 d2ns7a1 d2fq4a1 d2yvea1 d1t33a1 d2o7ta1 d1rkta1  
d2np3b1 d2g7ga1 d2gena1 d2fbqa1 d2g71a1 d2gfna1 d2g3ba1 d2jj7a1  
d2hyja1 d1sgma1 d1ui5a1 d2hkua1 d2id3a1 d4jyka1 d1b10a1 d1b10a2  
d1d5ya1 d3ubub\_ d1legia\_ d1qo3c\_ d1v7pa\_ d1tdqb\_ d3ubua\_ d1c3ab\_  
d1h8ua\_ d3bx4b\_ d1t8ca1 d1sb2a1 d1qdda\_ d2ziba1 d3cada\_ d1byfa\_

d1j34b\_ d1jwia\_ d1jzna\_ d1c3aa\_ d1wmza\_ d3bdwb\_ d1hq8a\_ d1fifa1  
d1dv8a\_ d3hupa\_ d1wk1a1 d1umra\_ d2afpa\_ d3bx4a\_ d1gz2a\_ d1sl6a\_  
d1v7pb\_ d3g8ka\_ d1ixxa\_ d1j34a\_ d1jwib\_ d1g1sa1 d1y17a1 d1ja3a\_  
d1fvub\_ d3bdwa\_ d1sb2b1 d1fvua\_ d1umrc\_ d1oz7a\_ d4m17a\_ d3cfwa1  
d1ypqa1 d1g1ta1 d3fd4a\_ d3l9jc\_ d4dn8a1 d1v41b\_ d1rd1l\_ d2msba\_  
d3lv8a\_ d1s3ga1 d1zaka1 d1s4qa\_ d3tvta2 d1uf9a\_ d1khta\_ d1ckea\_  
d1osna\_ d1p5zb\_ d4tmka\_ d3cm0a\_ d1tmka\_ d1jaga\_ d3h86a\_ d1t0hb\_  
d1nn5a\_ d2h92a\_ d3kb2a1 d2c95a1 d1yj5a2 d1kgda\_ d1ly1a\_ d1vyva2  
d1deka\_ d2grja1 d1p3ja1 d1y63a\_ d1e4ya1 d1s96a\_ d3iija1 d1lvga\_  
d1nksa\_ d1vyua2 d4e22a\_ d1qf9a\_ d1jjva\_ d1q3ta\_ d1ki9a\_ d1lw7a2  
d1teva\_ d1kjwa2 d1gsia\_ d2iyva2 d1kaga\_ d1e6ca\_ d1g3ma\_ d1j99a\_  
d1t8ta1 d1nsta\_ d1fmja\_ d1zrha\_ d1ls6a\_ d2a3ra\_ d1aqua\_ d2zptx\_  
d3ckla\_ d1texa\_ d1q44a\_ d2gwaha\_ d1uj2a\_ d4gi7a\_ d2jeoa1 d1rz3a\_  
d1z0ja1 d3umra2 d3gj0a1 d2gaoa1 d1yzga1 d1x3sa1 d1g7sa4 d1puja\_  
d1udxa2 d1kk1a3 d2o52a\_ d1jwyb\_ d1zcaa2 d1zcba2 d2fv8a1 d2cjwa\_  
d3dz8a1 d1xzpa2 d1vg8a\_ d4qxaa\_ d2ew1a1 d1x1ra1 d2bcgy\_ d3doea1  
d3cona\_ d3rega\_ d3wyga\_ d1upta\_ d2b6ha1 d1zd9a1 d1lnza2 d1r5ba3  
d1n0ua2 d1r2qa\_ d2f91a1 d2rhda\_ d3q3jb\_ d3q85a\_ d1efma1 d1r8qa\_  
d2gf9a1 d2akab1 d1ek0a\_ d1z08a1 d2gcoa1 d2dy1a2 d4g01b\_ d2cxa1  
d1svia\_ d3q72a\_ d1ni3a1 d4ac9a4 d2erxa1 d2bmea\_ d1wxqa1 d2gf0a1  
d4ldja1 d1zunb3 d1d5ca\_ d4lv5b\_ d1efca3 d1kmqa\_ d2g6ba1 d3lrpa\_  
d1tada2 d2y8ea\_ d4rd4a1 d1z06a1 d2heia\_ d3a58b\_ d1u01a2 d1d2ea3  
d1zj6a1 d2ocba\_ d3rwoa\_ d1mr3f\_ d2e9sa1 d4u5xa1 d2iwra\_ d2fn4a1  
d3bwdd\_ d2nzja1 d2atva1 d2ksqa\_ d3l43a\_ d1mkya2 d1mkya1 d1wmsa\_  
d1jnya3 d2rmka\_ d1f6ba\_ d1f60a3 d1gota2 d1jala1 d2fh5b1 d1g16a\_  
d2wblc\_ d1m7ba\_ d1wf3a1 d1f5na2 d1t9ha2 d1z6xa1 d1z0aa1 d2fg5a1  
d2a5ja1 d2bcjq2 d1s0ua3 d1ky3a\_ d4y0va\_ d4lhwa\_ d2qmea1 d2atxa1  
d1legaa1 d1ryha\_ d1moza\_ d1nrjb\_ d2erya1 d3bfka\_ d1puia\_ d3j3az1  
d3t5ga\_ d1shza2 d3defa\_ d2f7sa1 d3raba\_ d3tsoa\_ d3aq4a\_ d2a17a1  
d3sfva1 d3bc1a\_ d2ncda\_ d1sdma\_ d3h4sa1 d2heha\_ d2grya\_ g3kin.1  
d1br2a2 d1goja\_ d1f9va\_ d2mysa2 d1lkxa\_ d3t0qa\_ d4db1a1 d3gbja\_  
d1ry6a\_ d1v8ka\_ d1k8ka2 d1k8ka1 d3uleb1 d3i33a2 d3i33a1 d1bupa1  
d1dkgd2 d1dkgd1 d4ci6a2 d1jcfa1 d4a2ba2 d2fxua1 d1yaga2 d1yaga1  
d4cbua2 d1bupa2 d1g99a1 d2e1za2 d2e1za1 d1saza1 d1saza2 d1liqca2  
d1liqca1 d1eb7a1 d1nmla2 d1nmla1 d3h3no1 d3h3no2 d3ezwa2 d3h1jd1  
d1hroa\_ d4gedb\_ d3zooa\_ d1mz4a\_ d1gu2a\_ d1f1fa\_ d1dvva\_ d1c6ra\_  
d1c75a\_ d1e29a\_ d1gdva\_ d1cnoa\_ d1h32b\_ d1co6a\_ d2bh4x\_ d2aiua\_  
d5cytr\_ d1jdl\_a\_ d1i8oa\_ d2zboa\_ d3dmia\_ d1ls9a\_ d1wvec\_ d2yk3a\_  
d3ph2b\_ d1dw0a\_ d5aura\_ d1ql3a\_ d1qn2a\_ d1flca\_ d4zzva\_ d2xspa\_  
d4v20a\_ d1ojja\_ d4ipma1 d1gpia\_ d4csia\_ d3pfza\_ d3ovwa\_ d2yoka\_  
d2nqya\_ d1h4ga\_ d1oa2a\_ d1olra\_ d3b7ma\_ d4h7ma1 d3wp3a\_ d2vgda\_  
d1ligoa\_ d3zsea\_ d2nlra\_ d3wx5a\_ d1oa3a\_ d1pvxa\_ d1m4wa\_ d1f5ja\_  
d1oa4a\_ d1ks5a\_ d4ixla1 d1evsa\_ d1cnt1\_ d1pvhb\_ d1z7ca\_ d1huwa\_  
d1bgea\_ d1rhga\_ d1f6fa\_ d1f45b\_ d1ilrb\_ d1etea\_ d3tgxb\_ d1scfa\_

d2z3qa1 d3qb1a\_ d1hula\_ d1m48a\_ d4nkqb\_ d1v7mv\_ d5e4ea\_ d2o27a\_  
d3b5ka\_ d2psma1 d4zf7a\_ d3uf5a\_ d4x51a\_ d1d9ca\_ d4ypgc1 d3oq3a\_  
d1lqsl\_ d1n1fa\_ d1au1a\_ d1wu3i\_ d3bes1\_ d3ux9a\_ d1v8fa\_ d2ejca\_  
d3muea1 d3q12a1 d3rbaa\_ d2qtra\_ d1nupa\_ d3192a\_ d1f9aa\_ d1qjca\_  
d2h29a\_ d1vlha\_ d1od6a\_ d1lw7a1 d1mrza2 d4ruka\_ d2e17a\_ d1iq0a2  
d1r6ta2 d1ivsa4 d2cyba\_ d1rqga2 d1j09a2 d2yxna\_ d1f7ua2 d1h3fa1  
d1ffya3 d2g36a1 d1nzja\_ d1jila\_ d1n3la\_ d1i6la\_ d1pfva2 d1h3na3  
d3n9ia\_ d3sz3a1 d3sw2a\_ d1moxc\_ d1dx5i3 d1edmb\_ d1autl2 d1autl1  
d1nqlb\_ d1dval1 d1szba2 d1kigl\_ d2y5f1\_ d1ijqa2 d1gk5a\_ d1g1sa2  
d1nt0a3 d1xdtr\_ d1lmja2 d1lmja1 d1nzia2 d2wphe\_ d1klil\_ d1pfxl2  
d1pfxl1 d1p9ja\_ d1g1ta2 d1f7ea\_ d4yzub\_ d1gl4a2 d1qx2a\_ d2y5ia\_  
d1qlsa\_ d1psra\_ d3n22a\_ d2egda\_ d4ggfc\_ d2wcea\_ d2luca\_ d4aqia\_  
d3nsia\_ d2lp3a\_ d1j55a\_ d1a4pa\_ d1k8ua\_ d1nsha\_ d1pvaa\_ d3fs7a\_  
d2pvba\_ d1ttxa\_ d2kyfa\_ d1rk9a\_ d1a75a\_ d1exra\_ d1tiza1 d1nyaa\_  
d1g8ia\_ d1ggwa\_ d1wdcc\_ d3fwba\_ d1ggza\_ d2o5ga\_ d1ctaa\_ d1m45a\_  
d3i5gc\_ d1sl8a\_ d1fpwa\_ d2scpa\_ d2roaa\_ d4aqra\_ d3pn7b\_ d1br1b\_  
d1s6ca\_ d1bjfa\_ d2obha\_ d1jfka\_ d1jf0a\_ d1qv0a\_ d1lkja\_ d2mlfc\_  
d2m97a\_ d2d8na\_ d4by5a\_ d1jbaa\_ d4nqga\_ d1wdcb\_ d2mysc\_ d1j7qa\_  
d1s6ia\_ d1uhka2 d1r2ua\_ d1dtla\_ d3kf9a\_ d3pn7c\_ d5d67d\_ d1tuza\_  
d1h8ba\_ d1eg3a1 d1eg3a2 d2zkmx1 d1snla\_ d1gjya\_ d1y1xa\_ d1hqva\_  
d1dvia\_ d1df0a1 d1qxp2a d4usla\_ d1k94a\_ d1wkya2 d1uuqa\_ d3wh9a\_  
d4m1ra\_ d1xyza\_ d4xuya\_ d2je8a5 d4bf7a1 d3cuia\_ d1ur4a\_ d1qw9a2  
d1odza\_ d2vzsa5 d1bqca\_ d2x2ya1 d1qnra\_ d4y7ea1 d1vjza\_ d4k68a\_  
d2v3ga\_ d4hpga\_ d1nofa2 d1nq6a\_ d1h4pa\_ d1aq0a\_ d3ziza\_ d4bs0a\_  
d1ecea\_ d1h1na\_ d1ta3b\_ d1w91a2 d1i1wa\_ d1uhva2 d1us3a2 d1egza\_  
d7a3ha\_ d1tvna1 d3nyda1 d1ghsa\_ d2cyga1 d4xv0a\_ d2c8na2 d1w32a\_  
d3emca\_ d1v6ya1 d1foba\_ d2uwfa1 d2fgla\_ d3niya1 d2c0ha1 d1rh9a1  
d1yq2a5 d1szna2 d1fa2a\_ d1pama4 d5do8a1 d1ea9c3 d1hx0a2 d2fhfa5  
d1qhoa4 d1avaa2 d1m53a2 d4m8ua1 d2gjpa2 d1lwha2 d4howa1 d1ktba2  
d1j0ha3 d3vm5a1 d2x1ia\_ d1wzaa2 d1uasa2 d2diea1 d1mxga2 d1ht6a2  
d1eswa\_ d1liv8a2 d5cpsa\_ d1ud2a2 d1zjaa1 d3gbea1 d1kwga2 d1wdpa\_  
d1gcya2 d1g5aa2 d1hvxa2 d3dhp2a d2bhua3 d4do4a1 d3qgva1 d1e43a2  
d1g94a2 d2d3na2 d1gjwa2 d1gvia3 d1x1na1 d1r7aa2 d1tz7a1 glapy.1  
d31jqa\_ d4toqa\_ d1wb0a1 d1w9pa1 d1eoka\_ d1itxa1 d1kfwa1 d1goia2  
d1ledqa2 d2gsja\_ d1hjxa1 d1jnda1 d1vf8a1 d3wdpp1 d3wq5a\_ d4gxp2a\_  
d4hz8a\_ d1e4mm\_ d3aiua\_ d1wcga1 d1qvba\_ d3ahxa\_ d1v02a\_ d2dgaa\_  
d1pbga\_ d1vffa1 d1qoxa\_ d4ha4a\_ d2w0pa\_ d2diaa1 d2e9ia2 d2e9ja1  
d2dj4a1 d2eeba1 d2diba1 d2dmba1 d2dmca1 d2d7oa1 d2ee6a1 d2d7pa1  
d2eeaa1 d2di8a1 d1wlha1 d2d7na1 d2nqca\_ d2d7ma1 d2dica1 d3cnka\_  
d2k3ta1 d2eeca1 d1qfha1 d2bp3a1 d1v05a\_ d2ee9a1 d2eeda1 d2di9a1  
d3syxa1 d1mkea1 d2p8va\_ d1xoda1 d1i7aa\_ d1evha\_ d1qc6a\_ d1legxa\_  
d1b9ra\_ d1offa\_ d1frra\_ d3wcqa\_ d1l5pa\_ d1wria\_ d1i7ha\_ d3av8a\_  
d1czpa\_ d1rfka\_ d3p1ma1 d3b2ga\_ d2bt6a2 d1wgqa1 d1v89a1 d2coda1  
d1zc3b\_ d1wg7a1 d1u5ea1 d1v61a1 d2coca1 d2ys1a1 d1v5pa1 d1ntya2



d1wjma1 d1wila1 d1u29a\_ d1xx0a1 dlunqa\_ d2zkmx3 d1fhoa\_ d1v88a1  
d2adza1 d1x1fa1 d1p6sa\_ d2coaa1 d1btka\_ d1v5ma1 d1faoa\_ d2x18a\_  
d1dyna\_ d1x1ga1 d4kaxb\_ d2j59m1 d1ki1b2 d1xcga2 d1txda2 d1u5da1  
d1dbha2 d1wlha\_ d1upqa\_ d1v5ua1 d1foea2 d2fjla1 d1eaza\_ d2dfka2  
d2cofa1 d1kz7a2 d1h6ta1 d9ldta1 d2ewda3 d1up7a1 d2dfda1 d1s6ya1  
d1vjta1 d1hyea1 d1t2da1 d1ojsa3 d1b8pa1 d1ldna1 d1hyha1 d1civa1  
d2a92a1 d1ez4a1 d1i0za1 d1y6ja1 d1gv0a1 d1ur5a1 d1lllda1 d1obba1  
d1v8ba1 d1gdha1 d1l7da1 d2dlda1 d1mx3a1 d1ygya1 d1qp8a1 d1li4a1  
d2naca1 d1npya1 d3t4ea2 d1a4ia1 d1o0sa1 d2hk9a2 d2egga2 d1b26a1  
d1bvua1 d1gq2a1 d1clda1 d1gtma1 d1euzal d1nvtal d3dona2 d1ledza1  
d1gpja2 d1vi2a1 d1p77a1 d1nyta1 d1b0aa1 d1vl6a1 d1v9la1 d1txga2  
d3f47a1 d1mv8a2 d2pv7a2 d1xc2a3 d2ahra2 d4xiya1 d2f1ka2 d1pgja2  
d1i36a2 d1np3a2 d1l7ja2 d1teaa3 d1qmg2 d2i76a2 d2g5ca2 d1wdka3  
d1dlja2 d3cuma3 d1kola2 d1f8fa2 d1qora2 d1vj0a2 d1cdoa2 d1gu7a2  
d1d1ta2 d1xa0a2 d2dm6a2 d1jvba2 d1rjwa2 d1llua2 d1h2ba2 d1tt7a2  
d1piwa2 d1o89a2 d1iz0a2 d1e3ja2 d1yb5a2 d1uufa2 d1vj1a2 d1e3ia2  
d3gpdg1 d1vc2a1 d2nvwa1 d1u8fo1 d1ydwal d1hdgo1 d2g17a1 d1cf2o1  
d2czca2 d1r0ka2 d1obfo1 d2cvoal d1ebfa1 d1h6da1 d1i32a1 d1zh8a1  
d2q49a1 d1qkia1 d1j5pa4 d3pzra1 d1xeaa1 d1vkoa1 d1vm6a3 d3qvsa1  
d2pkqo1 d1b7go1 d1gr0a1 d1p1ja1 d1lc0a1 d1j0xo1 d3pwka1 d2hjsa1  
d1zyao1 d1vkna1 d1t1ta1 d1nvmb1 d3sjua\_ d3ojfa1 d1xu9a1 d2jjya1  
d1n7ha\_ d1y1pa1 d1h5qa\_ d1jtva\_ d4fs3a\_ d2bkaa1 d1gy8a\_ d2c5aa1  
d1ulsa\_ d1ooea\_ d2b69a1 d1y5ma1 d1spxa\_ d1aela\_ d1bxka\_ d1ydea1  
d1gega\_ d1hdoa\_ d1o5ia\_ d1e6ua\_ d1snya1 d2rhca\_ d3zv4a\_ d5ceja\_  
d2d1ya1 d1fjha\_ d3w8ea\_ d2fmua1 d1x1ta\_ d1rpna\_ d3ay7a1 d1k2wa\_  
d1eq2a\_ d2hrba1 d3ruaa\_ d2ew8a1 d4hwka\_ d1xgka\_ d2bd0a1 d1yo6a1  
d2a35a1 d2ntva\_ d1vl8a\_ d1hdca\_ d4bkua\_ d2ag5a1 d2q45a\_ d1nffa\_  
d4iy1a\_ d1zbqa1 d1kewa\_ d1ek6a\_ d1ja9a\_ d2q46a2 d1iy8a\_ d1cyda\_  
d2ptga\_ d1hxha\_ d1uzma1 d3lyla\_ d4m89a\_ d3wyea\_ d2b1la1 d1w6ua\_  
d1sb8a\_ d2q2va\_ d4nr0a\_ d1e6wa\_ d2gasa\_ d3oiga1 d2bgka1 d1mxha\_  
d1vl0a1 d1rkxa\_ d1r6da\_ d1wmaa1 d1e7wa\_ d2c07a1 d1xkqa\_ d3tzha\_  
d1g0oa\_ d3lz6a\_ d1qyca\_ d1ledoa\_ d1gz6a\_ d1oc2a\_ d1t2aa\_ d1zema1  
d2xoxa\_ d1z45a2 d1geea\_ d1p33a\_ d3lt0a\_ d4e6pa\_ d2wyua\_ d1db3a\_  
d4q9na\_ d1xhla\_ d4o1ma\_ d1fmca\_ d2uvda\_ d2gdza1 d1uaya\_ d2z1ma\_  
d2o23a2 d2fr1a2 d2fr1a1 d1qsga\_ d1qyda\_ d4zjua\_ d2a4ka1 d1yb1a\_  
d1wvga1 d1yxma1 d3f4ba\_ d1mg5a\_ d1xg5a1 d2gfoa1 d1vjva\_ d2ayna1  
d3nhea\_ d3nqyb\_ d4gera\_ d1bqba\_ d1mdwa\_ d1qxp4 d1ziva1 d1zcma1  
d3ioqa\_ d1fh0a\_ d1o0ea\_ d1khqa\_ d1m6da\_ d2cb5a\_ g8pch.1 d1s4va\_  
d2pnsa\_ d1vsna1 d1mira\_ d1iwda\_ d2oula\_ d7pcka\_ d3bwka\_ d3bcna\_  
d2p86a\_ d1pvja\_ d1pcia\_ d1gece\_ d1deua\_ d4bs6a\_ d1xkga1 d1cqda\_  
d1jqpa2 d2c0ya\_ d2bdza\_ d3p5ua\_ d1zoya1 d1qo8a2 d1d4ca2 d1jnra2  
d1kf6a2 d2jk6a2 d2jk6a1 d1feca1 d1feca2 d1lpfa1 d1lpfa2 d1xhca1  
d1xhca2 d1dx1a2 d1dx1a1 d1gera2 d1m6ia2 d1onfa1 d1onfa2 d3lada2  
d3lada1 d1w4xa1 d1w4xa2 d1gesa2 d1mo9a1 d1xdia1 d1fl2a2 d1fl2a1

d1fcda1 d1fcda2 d1h6va2 d1h6va1 d1mo9a2 d1gv4a2 d1gv4a1 d2gv8a2  
d2gv8a1 d1aoga1 d1aoga2 d1hyua1 d1ebda1 d1ebda2 d3dk9a1 d1qlra2  
d1qlra1 d1gesa1 d1zbfal d2z1ha\_ d2etja1 d3qioa1 d1j11a\_ d2e41a\_  
d1j12a\_ d21sna1 d1lio2a\_ d1uaxa\_ d2yv0x\_ d1mu2a1 d1lekea\_ d1i39a\_  
d1pn0a1 d1reoa1 d1ju2a1 d2f5va1 d3c96a1 d2gmha1 d1gpea1 d1o5wa1  
d1n4wa1 d1k0ia1 d2dw4a2 d2ivda1 d1seza1 d2voua1 d1kdga1 d2bcgg1  
d2bcgg2 d1d5ta1 d1liv0a\_ d2v76a\_ d1wj1a1 d1aqca\_ d1qqga2 d1qqga1  
d1ntva\_ d1n3ha\_ d4dbba\_ d3f0wa1 d1p3ra\_ d1wgua1 d2cy4a1 d3hqca\_  
d1wvha1 d1xr0b1 d3nvva1 d1krha3 d2h88b1 d1t3qa2 d1kf6b2 d1zoyb1  
d1jq4a\_ d1ffva2 d1dgja2 d1rm6c2 d1jmxal d1pbya1 d1pbya2 d1r7ha\_  
d1faaa\_ d1wika1 d1xfla\_ d1ttza1 d2f51a1 d1ti3a\_ d1nhoa\_ d1sena\_  
d2i4aa\_ d1ep7a\_ d1zmaa1 d1fo5a\_ d3lefa1 d3diea1 d2yana1 d1z6na1  
d1oaza\_ d3zywa1 d4aj8a\_ d1nm3a1 d4fiwa\_ d1wmja\_ d4hs1a1 d1lloa\_  
d1xwaa1 d1wjka1 d2vm1a\_ d1fb6a\_ d1gh2a\_ d1h75a\_ d1nw2a\_ d1kx5b\_  
d3a6na\_ d4m6ba2 d2nqbd\_ d3wkjd\_ d2yfwe\_ d4h9na\_ d5bnxa\_ d1kx5c\_  
d3r45a\_ d1eqzb\_ d4jjnb\_ d1f66c\_ d1eqza\_ d4wnnb\_ d1kx5a\_ d1u35c1  
d1id3a\_ d2nqbc\_ d1kx5d\_ d1ku5a\_ d1f1ea\_ d2b5ea2 d2b5ea3 d2b5ea1  
d2b5ea4 d2kp1a1 d2kp2a1 d1hyua3 d1hyua4 d1j08a1 d1pd212 d1nhya2  
d2a2ra2 d1k0dd2 d1f2ea2 d1gsua2 d1f3ba2 d2fhea2 d2pvqa1 d1tw9a2  
d1oyja2 d1e6ba2 d1k0ma2 d3ik7a1 d4is0a1 d1r5aa2 d1j1va2 d1m0ua2  
d3gtub2 d1z9ha2 d1okta2 d1axda2 d2gsra2 d1tu7a2 d1k3ya2 d1zgm1  
d1b48a2 d1gnwa2 d1gwca2 d2gsta2 d1glqa2 d1oe8a2 d1pn9a2 d1v2aa2  
d1fw1a2 d1duga2 d3vrda1 d3vrda2 d1fcdc2 d1h1oa2 d1h1oa1 d1m70a2  
d1m70a1 d1g7ea\_ d1ig8a1 d1czan2 d1czan3 d1czan1 d1ig8a2 d1czan4  
d1bg3a4 d1bg3a3 d1bg3a1 d1qsaa2 d4iilya\_ d1chka\_ d4olta\_ d3wyha\_  
d4g9sa1 d3gxra\_ d1qqya\_ d1gd6a\_ d1livma\_ d2gv0a\_ d1iiza\_ d2z2fa\_  
d1j8xa\_ d1gh1a\_ d1b9oa\_ d3w3ea\_ d4tx7a\_ d3cqla\_ d4msta\_ d3iwra\_  
d2z37a\_ d4dyga\_ d1mpya2 d1kw3b2 d1kw3b1 d4ghga1 d1tfza1 d3isqa1  
d3isqa2 d1sqia1 d1sqia2 d1lkda2 d1lkda1 d1mpya1 d1cjxa2 d1sp9b2  
d1t47a1 d1t47a2 d1f1ua2 d1sp8a1 d1sp8a2 d1f1ua1 d1lumqa\_ d1g2ha\_  
d1ro5a1 d1s5ja2 d1qhta2 d4dlea2 d1tgoa2 d3py8a2 d1q8ia2 d1kfsa2  
d2py5a2 d1d5aa2 d1qsta\_ d2beia1 d4m3sa\_ d1u6ma1 d1ygha\_ d1yk3a1  
d3dr6a\_ d1xmta\_ d1z4ea1 d2ge3a1 d1bo4a\_ d2fiaa1 d2jdca1 d1y9wa1  
d3to7a\_ d1wwza1 d2f14a1 d2ozua1 d2b5ga\_ d2cy2a1 d2p0wa\_ d1cm0a\_  
d4pswa\_ d1yrea1 d1yr0a1 d1m4ia\_ d2gana1 d1yvka1 d1ghea\_ d2g3aa1  
d1y7ra1 d2euia1 d1q2ya\_ d2fsra1 d1xeba\_ d2ae6a1 d1cjwa\_ d1qsma\_  
d2aj6a1 d1y9ka1 d1i12a\_ d1vkca\_ d2atra1 d1n71a\_ d2d4pa1 d2fiwa1  
d2fe7a1 d1tiqa1 d2ou2a\_ d1yx0a1 d2fcka1 d1p0ha\_ d2j8ma\_ d2pq8a\_  
d1z4ra1 d1s3za1 d1ufha\_ d1c4qa\_ d1prtc1 d2wv6d\_ d1prtf\_ d1l1trd\_  
d4l63b1 d1r4pb\_ d1prtd\_ d1t10f\_ d2bosa\_ d1prtb1 d1xvqa1 d1pn0a2  
d3hy2a\_ d2cvba1 d1o8xa\_ d1lu4a\_ d1we0a1 d2bmxal d2a4va1 d1psqa\_  
d1xiya1 d1q98a\_ d1n8ja\_ d1zofa1 d2ggta\_ d3tjja\_ d4je1a1 d1o73a\_  
d3s9fa\_ d2zcta\_ d1qmva\_ d1jfua\_ d2b1ka\_ d5dvba1 d2b5xa1 d2v2ga\_  
d1st9a\_ d3tb2a\_ d4llra\_ d4fh8a1 d1e2ya\_ d1knga\_ d2h30a\_ d1i5ga\_

d2z9sa\_ d2f8aa1 d1tp9a1 d2b7ka\_ d1nm3a2 d3hvva\_ d2wfca1 d4kcea\_  
d1xvwa1 d4gqca1 d3qpma\_ d4k1fa\_ d1zzoa1 d1gpla\_ d1prxa\_ d1rmka\_  
d1ixta\_ d1eyoa\_ d1cna\_ d1fu3a\_ d1f3ka\_ d1fyga\_ d1cg2a1 d1yloa2  
d1y7ea2 d1y0ya3 d1lfwa1 d1vixa1 d1fnoa4 d1vhoa2 d1ysja1 d1z2la1  
d2fvga2 d1vgya1 d1r3na1 d2grea2 d1xmba1 g1q7l.1 d1rtqa\_ d1ysl\_x\_  
d4hs9a\_ d1ispa\_ d1ku0a\_ d3qmma\_ d1ra6a\_ d1muka\_ d3gsza\_ d1khva\_  
d1te9a\_ d2xwha\_ d3uqsa\_ d3hkwa\_ d3n6ma\_ d2cjqa\_ d2xyma\_ d1teba\_  
d1te8a\_ d1s48a\_ d1u09a1 d4wfxa\_ d3tyqa\_ d2pgga1 d3rp2a\_ glucy.1  
d1fuja\_ d2zchp\_ d3w94a\_ d1si5h\_ d1lo6a\_ g2pka.1 d1cgga\_ d1kigh\_  
d1a5ia\_ d3s9ba\_ d1hj8a\_ d1ao5a\_ d2anya\_ d1q3xa1 d1gvza\_ d1azza\_  
d4gsoa\_ d2f91a1 d1iaua\_ d1gdna\_ d1eufa\_ g1fiw.1 d1eq9a\_ d4nfea\_  
d2rdla\_ d1spja\_ d1elva1 d1a7sa\_ d1ekbb\_ d1pfxc\_ d1yc0a\_ d2aiqa\_  
g1fiz.1 d1fi8a\_ d4k60a\_ d4dgja\_ d1mzaa\_ d1op0a\_ d3tjva\_ d1pytd\_  
d1sgfg\_ g1gg6.1 d2eeka\_ g1rtf.1 d1a0ja\_ d3g01a\_ d1pytc\_ d4e7na\_  
d1ddja\_ d1z8ga1 d2hlca\_ d1npma\_ g1jou.1 d1sgfa\_ d1autc\_ g2hnt.1  
g1kdq.1 d1orfa\_ d3s69a\_ d4crga\_ d1fxya\_ d1bqya\_ d1lgya\_ d4l3wa\_  
d1llfa\_ d1gz7a\_ d1lukca\_ d2hqya1 d2hqya2 d1ne9a1 d1lra3 d1ne9a2  
d3groa\_ d1pjaa\_ d1thta\_ d1svpa\_ d1mbma\_ d3su6a1 d1cula1 d4agka\_  
d1vcpa\_ d1q31a\_ g1n1l.1 d3e90b\_ d1ep5a\_ d3u1jb\_ d3zxha\_ d1cgl\_a\_  
d1rm8a\_ d1eaka2 d1hy7a\_ d2jsda\_ d1cxva\_ d1hv5a\_ d1i76a\_ d3p0ya1  
d1igra1 d1igra2 d1n8yc2 d1n8yc1 d1m6ba2 d1m6ba1 d4dv8a2 d1m4la\_  
d2bk7a\_ d3fjua\_ d1z5ra1 d1uwya2 d1jqga1 d2c1ca1 d1dtda\_ d1h8la2  
d2tbvc\_ d1c8nc\_ d1x36a\_ d1smvc\_ d1ng0c\_ d4sbvc\_ d1f2nc\_ d1cixa\_  
d1y29a\_ d1v7fa\_ d2jtba\_ d1d1ha\_ d1g9pa\_ d1qk7a\_ d1mb6a\_ d2a2va\_  
d1niya\_ d1i25a\_ d1hvwa\_ d2mpqa\_ d1ie6a\_ d1kqha\_ d1la4a\_ d2mxoa1  
d1d10a\_ d1koza\_ d1qk6a\_ d1emxa\_ d1lqra\_ d1c6wa\_ d1js9c\_ d1f15b\_  
d1za7a\_ d1laja\_ d1rypd\_ d1lrua\_ d1rypc\_ d3unfk\_ d1rypa\_ d1j2pa\_  
d1lirui\_ d1j2qh\_ d3unfh\_ d1m4ya\_ d1rypb\_ d1lru1\_ d1lru2\_ d1q5rh\_  
d1rypg\_ d1g3ka\_ d1liruf\_ d1q5qa\_ d1e94a\_ d1lirub\_ d1ryph\_ d3ty6a\_  
d1liruj\_ d1liruk\_ d1rype\_ d1lirud\_ d1lirue\_ d3mi01\_ d1rypf\_ d1liruh\_  
d2z3ba\_ d1liruc\_ d3mka2\_ d1lru1\_ d1ny721 d1ny722 d1a6ca3 d1a6ca2  
d1a6ca1 d1pgl22 d1pgl21 d1pgl11 d1mqta\_ d1d4m3\_ d1fmd3\_ d2mev1\_  
g1aym.1 d1ev13\_ d4q4w1\_ d1r1a3\_ d2x5ia\_ d1rhi1\_ g1r1a.1 g1d4m.1  
g1rhi.1 d1b35b\_ d1loopa\_ d1tme1\_ d4iv1a\_ g1pvc.1 g1fpn.1 d1fpn1\_  
d4gb31\_ d1d4m1\_ d1fmd1\_ d1ev11\_ d2wzr3\_ g1cov.1 d1qqp3\_ g1fmd.1  
d2x5ic\_ d1rhi3\_ g1loop.1 d1hxs1\_ g1hxs.1 d1fpn3\_ d1bev1\_ g2mev.1  
d1eah3\_ d1aym1\_ d1pvc3\_ d1qqp1\_ d1zba3\_ d1h8ta\_ d3vbhc\_ g1b35.1  
g1bev.1 d1hxs3\_ g1ev1.1 d1bev3\_ g1tmf.1 d1tmf1\_ d1b35a\_ d2mev3\_  
g1eah.1 g1h8t.1 d1eah1\_ d4q4w3\_ d1r1a1\_ d1aym3\_ d1pvc1\_ d1zba1\_  
d1h8tc\_ d1loopc\_ d1tme3\_ g1qqp.1 d4iv1c\_ d1ju8a\_ d3ia2a\_ d1a88a\_  
d4dgqa1 d1hkha\_ d1zoia\_ d4lt9a1 d3tc7a1 d3hoja\_ d1i4na\_ d3vnda\_  
d3n18a1 d1geqa\_ d3nava1 d4a2ra1 d3tc6a1 d1ujpa\_ d4ijba\_ d1xcfa\_  
d1vc4a\_ d1rd5a\_ d1qopa\_ d3b5va\_ d2r80b\_ d1cqa1 d1cg5a\_ d1gcvb\_  
d3boma\_ d2h8fb\_ d2raoa\_ d3bj1a\_ d4hrrb\_ d2r50a\_ d3d1kb\_ d2aa1b1

d3zhwa\_ d3hf4b\_ d3gdja\_ d1jebb\_ d3bj1b\_ d1x9fb\_ d1wmub\_ d1gcva\_  
d3bcqb\_ d3d4xb\_ d1gvha1 d2dc3a\_ d3hf4a\_ d4yu3a\_ d3k8ba\_ d1qpwb\_  
d2r80a\_ d3bcqa\_ d1v4wa\_ d3wtgb\_ d1j17a\_ d4esaa\_ d1a9we\_ d3d1ab\_  
d1fsla\_ d4h21a\_ d1v4wb\_ d1mwca\_ d1vhba\_ d1jeba\_ d1spgb\_ d1h97a\_  
d1q1fa\_ d1tu9a1 d3d1aa\_ d1hdsb\_ d3hyub\_ d2zfb\_ d3fs4a\_ d1oj6a\_  
d1shrb\_ d4h21b\_ d4yu3b\_ d1spga\_ d3hrwa\_ d3qqra\_ d3at5a\_ d4wchd\_  
d3hyua\_ d1cg5b\_ d1uc3a\_ d1hbra\_ d2raob\_ d1outb\_ d4esab\_ d3gdjb\_  
d3qqqa\_ d1x9fc\_ d3vrfa\_ d1litha\_ d3mkba\_ d3d4xa\_ d3mjpa\_ d1j16a\_  
d3fh9a\_ d1outa\_ d2dc3b\_ d1it2a\_ d3eoka\_ d3g46a\_ d1qpwa\_ d3vrfb\_  
d1ch4a\_ d1x9fd\_ d1hdsa\_ d2zfba\_ d3mkbb\_ d1or4a\_ d3wtga\_ d1a4fa\_  
d3fh9b\_ d3bomb\_ d3cy5a\_ d3at5b\_ d1x9fa\_ d2oifa\_ d4lmb\_ d1cpcb\_  
d3v57a\_ d1kn1a\_ d1cpca\_ d4f0ta\_ d2vjha\_ d4po5b\_ dleyxa\_ d1alla\_  
d4f0tb\_ d1b33b\_ d1b8db\_ d4h0mb\_ d1b33a\_ d2vjhb\_ d4lm6b\_ d2vmlb\_  
d2vjta\_ d3dbja\_ d2vmla\_ d2vjtb\_ d4f0ub\_ d1f99b\_ d4rmpa1 d1liaa\_  
dleyxb\_ d2uulb\_ d4lmsb\_ d4f0ua\_ d2bv8a\_ d1f99a\_ d2bv8b\_ d2c71b\_  
d3dbjb\_ d4rmpb1 d1b8da\_ d4h0ma\_ d3v57b\_ d1kn1b\_ d1liab\_ d2uula\_  
d2j96a\_ g1gxs.1 g1wht.1 d1mtza\_ d2xqfa\_ d1ea5a\_ d1f6wa\_ d1dx4a\_  
d1qe3a\_ d1k4ya\_ d4qwwa\_ d2ha2a\_ d3c8da2 d2pbla1 d1jkma\_ d1jjia\_  
d1jjfa\_ d2qvba\_ d2v9za\_ d4kafa1 d4iuaa3 d4bvva\_ d5hpga\_ d3k65a\_  
d1ki0a3 d1ki0a2 d1ki0a1 d1a0ha1 d1pmla\_ d3sp8a3 d2feba1 d1dosa\_  
d1gvfa\_ d3qm3a1 d2fjka\_ d1f74a\_ d3l21a\_ d2e1da\_ d1to3a1 d1w3ia\_  
d1sfla\_ d1n7ka\_ d1vcva1 d4imea\_ d1wa3a\_ d2ocza1 d1f2ja\_ d3m16a\_  
d2yxga\_ d1ub3a\_ d3a5fa\_ d1fbaa\_ d1l6wa\_ d1xfba1 d1wx0a1 d1vpxa1  
d1ojxa\_ d1mxsa\_ d2a4aa1 d1xkya1 d3cq0a1 d3s1xa\_ d1f05a\_ d1fdja\_  
d3cpa1 d4d2ja\_ d4mh8a\_ d1mu2a2 d4i7ga1 d2ftba\_ d1pmpa\_ d2rcqa1  
d1fdqa\_ d4lkpa\_ d1sa8a\_ d1vyfa\_ d1lpja\_ d3vg7a1 d4azqa1 d1o8va\_  
d5bvqa\_ d1p6pa\_ d2qo4a\_ d1opba\_ d1yiva1 d1o1va\_ d4bvma1 d4tkba\_  
d4i3ba\_ d1bwya\_ d1ftpa\_ d1ggla\_ d4gkca\_ d1cbia\_ d3p6da1 d1kqwa\_  
d2a0aa1 d1dzka\_ d4tlja\_ d2a2ua\_ d4wfva\_ d3t1da\_ d4iixa\_ d3zq3a\_  
d2nnda\_ d1i4ua\_ d1kxoa\_ d1bbpa\_ d1kt7a\_ d1exsa\_ d3s26a1 d1lf7a\_  
d1qfta\_ d4gh7a\_ d1z24a1 d1qabe\_ d1xkia\_ d3bx7a\_ d4iawa1 d1n0sa\_  
d1gkab\_ d3kzaa\_ d2k23a\_ d2l9ca1 d2joza1 d1gm6a\_ d3kffa\_ d3saoa1  
d1e5pa\_ d1yupa1 d1iiua\_ d4lu0a\_ d1of8a\_ d3unda1 d3e9aa1 d1vr6a2  
d1n8fa\_ d2qkfa\_ d1d9ea\_ d1o60a\_ d1e69a\_ d1mv5a\_ d3g60a4 g1ii8.1  
d1ewqa2 d1ji0a\_ d1v43a3 d2wmfa1 d1vpla\_ d1g2912 d4a82a2 g1f2t.1  
d2d62a1 d3tuic1 d2bbsa1 d3g60a3 d2ixea\_ d1g6ha\_ d1sgwa1 d2qi9c\_  
d3r1fa1 d3b60a1 d3d31a2 d2pzea1 g1xew.1 d1jj7a\_ d1oxxk2 d2onka1  
d1w1wa\_ d3gqba2 d1skye3 d1xp8a1 d1tf7a2 d1tf7a1 d1ye8a1 d1skyb3  
d2qe7d2 d4blta\_ d4huta\_ d3l1daa2 d4hyya\_ d2i3ba1 d1cr1a\_ d3j9tb2  
d3ntua2 d1vdza1 d2z43a\_ d1e9ra\_ d1nlfa\_ d3ziaa2 d1n0wa\_ d3ziad2  
d3j9ta2 d1pzna2 d3gqbb2 d2i49a\_ d1nnfa\_ d1xvxa\_ d1ursa\_ d1h3da1  
d1iuda\_ d4m1va1 d1twya\_ d3e13x\_ d2nxoa1 d4pfua\_ d3ttma\_ d1elja\_  
d2qmw1 d1us5a\_ d1y3na1 d1jeta\_ d1uqwa\_ d4f19a1 d2esna2 d3thia\_  
d3fasa1 d2uyeb\_ d2xwva1 d1r91a\_ d2fyia1 d1pb7a\_ d2ozza1 d1sw5a\_

d1nh8a1 d1vr5a1 d2g29a\_ d1xs5a\_ d3lswa\_ d2z23a\_ d3w9va\_ d3tcha\_  
d1q35a\_ d1z7me1 d3q27a\_ d1p99a\_ d1ve4a1 d2i6ea1 d4mcoa1 d4n8ya\_  
d1eu8a\_ d1zbma1 d1ixca2 d1j1na\_ d1xvya\_ d1y9ua\_ d2z22a1 d1xoca1  
d4oera\_ d1wdna\_ d5f1qa1 d1xt8a1 d1i6aa\_ d4gwoa\_ d4igta1 d1pc3a\_  
d4mmpa1 d1o63a\_ d2cz1a1 d2onsa2 d4mija1 d4ok5a1 d2bmfa1 d2bmfa2  
d1yksa1 d1yksa2 d2qeqa1 d2j1qa1 d1a1va2 d1eh3a\_ d3skpa\_ d1dtza1  
d1dtza2 d1ieja\_ d1jnfa2 d1jnfa1 d1b1xa2 d1b1xa1 d1jw1a1 d1jw1a2  
d1ryoa\_ d1h76a1 d1h76a2 d1c4oa1 d2p6ra3 d2p6ra4 d1oywa2 d1oywa3  
d1wrba1 d1w36b2 d1w36b1 d1c4oa2 d3bora\_ d1t6na\_ d2eyqa5 d2eyqa3  
d2eyqa2 d2zu6a2 d1veca\_ d1uaaa1 d1w36d1 d2g9na1 d1z3ix2 d2rb4a\_  
d1hv8a1 d1hv8a2 d1t5ia\_ d1w36c2 d2j0sa2 d2j0sa1 d1fuka\_ d3hjha1  
d1z5za1 d1qdea\_ d1z63a1 d1s2ma2 d1s2ma1 d1wp9a1 d1wp9a2 d1gm5a3  
d1gm5a4 d3dina4 d3dina3 d1q0ua\_ d1w36c1 d1z3ix1 d1nkta3 d1nkta4  
d1uaaa2 d1w36d2 g1qhh.1 d2fwra2 d2fwra1 d3q3ma\_ d1za0a1 d1mxra\_  
d2inca\_ d1jk0a\_ d2incb\_ d1mhyb\_ d3hf1b\_ d1r2fa\_ d2uw1a\_ d1mhyd\_  
d3n37a\_ d1afra\_ d1oquc\_ d1syya\_ d1mtyd\_ d2o1za\_ d1uzra\_ d1smsa\_  
d2fkza\_ d1zujal d1s3qa1 d2fjca1 d1z6om1 d1veia\_ d4dyya\_ d1jiga\_  
d3gvya\_ d2pyba\_ d4cy9a1 d3bvfa1 d1r03a\_ d2cf7a\_ d1nf4a\_ d1zs3a1  
d4iwka\_ d3ka8a\_ d3np0x\_ d1n1qa\_ d11b3a\_ d4e6ka\_ d1z6oa1 d2fzfa1  
d4dyua\_ d3ge4a\_ d1jgca\_ d4am4a\_ d2z6ma\_ d1ji5a\_ d1vlga\_ d11koa1  
d1krqa\_ d3qz3a\_ d1o9ra\_ d2ffxj\_ d1euma\_ d1yv1a1 d2v2pa\_ d1j30a\_  
d4di0a\_ d1oewa\_ d2qzxa\_ d2asia\_ d1psoe\_ d1miqa\_ d2h6ta\_ d1pfza\_  
d1izda\_ d3hd8a\_ d1j71a\_ d1dpja\_ d4aa9a\_ d1t6ex\_ g1b5f.1 g1lya.1  
g1htr.1 d1qdma2 d1bxoa\_ d1wkra\_ d1tzsa\_ d1libqa\_ d2qzwa\_ d1bdqa\_  
d3ggta\_ d3ixoa\_ d1mrx\_ d2haha\_ d1tw7a\_ d4njsa\_ d1sgua\_ d2p3da\_  
d1nsoa\_ d3d3ta\_ d2rkfa\_ d1c6ya\_ d2rspa\_ d3ogpa\_ d3ekwa\_ d2o4na\_  
d2j9ja\_ d1baia\_ d3ggua\_ d3lzua\_ d4npua\_ d4j55a\_ d2r8na\_ d2fxda\_  
d2p3ca\_ d4dqa\_ d3ttpa\_ d3t3ca\_ d2p3aa\_ d2hc0a\_ d2fdda\_ d3mwsa\_  
d1k8rb\_ d1wgra1 d1ef5a\_ d1wfyal d1wgya1 d1lfda\_ d2cs4a1 d1wxma1  
d2byea1 d3kh0a1 d2byfal d1wxaa1 d1e7ua3 d1wgda1 d1wgga1 d4q5eb\_  
d1wjna1 d1se9a\_ d3n3kb\_ d1wz0a1 d1we6a1 d2m0xa\_ d2gbka\_ d3rt3b1  
d1wh3a1 d1sifa\_ d2ekek2 d4ii2b1 d4hk2a1 d1c3ta\_ d1m94a\_ d1wgha1  
d1ttna1 d1j8ca\_ d1wx8a1 d3v6cb1 d2ma9b\_ d4i6lb1 d1bt0a\_ d2jvca1  
d1iyfa\_ d2k1fa\_ d1wxva1 d1wf9a1 d1t0ya\_ d2io0b2 d1x1ma1 d2gbma\_  
d1zw7a1 d2m17a\_ d1ud7a\_ d1we7a1 d2lwpa\_ d2gbja\_ d1wjua1 d1v6ea1  
d1v86a1 d4eewa\_ d1wiaa1 d4icva\_ d4gu2a\_ d1wx7a1 d1wy8a1 d4hjka1  
d2faza1 d1v5oa1 d3ruib\_ d1eo6a\_ d3waob\_ d2r2qa1 d3m95a\_ d3wana\_  
d2a13a1 d2cr5a1 d1wj4a1 d1s3sg\_ d1qoza\_ d5ajha1 d2h0ba\_ d2erfa\_  
d1h30a2 d1h30a1 d3mw4a1 d1pz7a\_ d2r1ba\_ d3v64a1 d1d2sa\_ d3bopa1  
d3mw3a1 d1okqa1 d1s5ja1 d2hbja2 d2igia\_ d1wlja\_ d1qhta1 d4dlea1  
d1tgoa1 d2f96a1 d3tr8a1 d3mxma\_ d1q8ia1 d1y97a1 d1w0ha\_ d1kfsa1  
d2py5a1 d1d5aa1 d1yt3a3 d2guia\_ d3mwpa1 d4kb1a\_ d1e88a1 d1l6ja5  
d1l6ja4 d1eaka4 d1eaka3 d1l6ja3 d1h8pa2 d1um8a\_ d1lixza\_ d1qvra2  
d1qvra3 d1qzma\_ d1sxjc2 d1jr3d2 d2p65a\_ d1l8qa2 d1g8pa\_ d3hu3a3

d1sxjd2 d1njfa\_ d1in4a2 d1sxja2 d1tuea1 d2ce7a2 d1w5sa2 d1sxjb2  
d1d2na\_ d1ny5a2 d1ofha\_ d2gnoa2 d2a5yb3 d1fnna2 d1u0ja1 d1iqpa2  
d2fnaa2 d1ixsb2 d4gita\_ d1sxje2 d1g41a\_ d2e3fa\_ d1mm0a\_ d2e3ea\_  
d21lda\_ d2ny8x\_ d2e3ga\_ d2ny9x\_ d2nz3a\_ d21j7a\_ d1n4na\_ d2m8bb1  
d2kyqa\_ d3psma\_ d1jkza\_ d1jxca\_ d2g11a\_ d1ugla\_ d4uj0a\_ d2k4ua\_  
d1hp2a\_ d2lu9a\_ d1baha\_ d2meoa1 d1wm7a\_ d1hlya\_ d1n8ma\_ d1jlza\_  
d1wpda\_ d1pvza\_ d1wt7a\_ d1rjia\_ d1wz5a\_ d1m2sa\_ d1pjva\_ d1c49a\_  
d1qkya\_ d2ktca1 d1wmta\_ d1du9a\_ d1j5ja\_ d1r1ga\_ d1t0za\_ d2i61a\_  
d1t1ta\_ d1sn4a\_ d1kv0a\_ d21kba\_ d1npia\_ d1wwna\_ d1pe4a\_ d2kbka\_  
d21i7a\_ d1djta\_ d2kbha\_ d1dq7a\_ d1sega\_ d1omya\_ d1zywa1 d1jzaa\_  
d1t61c1 d1iyjb4 d1iyjb5 d1iyjb3 d1o7ia\_ d4ipca1 d1x3ea\_ d4apva\_  
d1jb7a1 d1jb7a2 d1jb7a3 d3kdfa\_ d1ue1b\_ d1wjja1 d3eiva\_ d1xjva2  
d1xjva1 d2ccza2 d1se8a\_ d1l1oc\_ d1jb7b\_ d1qvca\_ d3ulla\_ d1qzga\_  
d1miua4 d1miua5 d1miua3 d1y14b1 d2nn6i1 d1i94l\_ d2zjra2 d1smxa\_  
d2qamc2 d1hh2p1 d2r7da1 d1r12a2 d1wfga1 d3bzka4 d1x6oa2 d3a0ja\_  
d2j01d2 d2ja9a1 d4q15a\_ d1hr0w\_ d1luza\_ d2n3sa\_ d2vnud1 d1h95a\_  
d1go3e1 d2nn6h1 d1ne3a\_ d2mo1a\_ d1iz6a2 d1jjga\_ d1e3pa2 d2ix0a3  
d2ix0a2 d2lxja\_ d1ueba3 d1ueba2 d2z0sa1 d1u0la1 d2ix0a1 d2eifa2  
d2je6i1 d3i2za1 d2c35b1 d2ahob2 d1t9ha1 d3i4oa\_ d2qall1 d1jt8a\_  
d2nn6g1 d1g6pa\_ d3cama\_ d1i94q\_ d1c9oa\_ d1d7qa\_ d2ba0a1 d2vnud2  
d2vnud3 d1khia2 d2qalq1 d1wi5a1 d1xtda2 d1ny4a\_ d1fvia1 d1ckma1  
d1p16a1 d1x9na2 d1cwva5 d1ohea1 d1ohea2 d2f4da\_ d1rxda\_ d2hxpa\_  
d1xria\_ d1d5ra2 d1fpza\_ d3ezza\_ d4y2ea\_ d1i9sa\_ d3azya\_ d3wvja\_  
d1upsa1 d1ajoa\_ d2hyka\_ d1ajka\_ d2vy0a\_ d3o5sa\_ d3d6ea\_ d3atga\_  
d1dypa\_ d1umza\_ d3i4ia\_ d1c11a\_ d41bqa\_ d1a78a\_ d1slta\_ d4no4a\_  
d3zsja\_ d3duia\_ d1g86a\_ d1qmja\_ d1hlca\_ d1tdha3 d1q3ba3 d1ee8a3  
d1k82a3 g1qmo.1 g1len.1 d3zyra\_ d1fnya\_ d1n47a\_ g21tn.1 d1avba\_  
d3usua\_ d1dhkb\_ d1f9ka\_ d1lukga\_ d1g8wa\_ d1g9fa\_ d3wcsa\_ d1g7ya\_  
g1loe.1 d1mvqa\_ d1hq1a\_ d1v6ia\_ d1dbna\_ d1qnwa\_ d1fx5a\_ d418qa\_  
d1ioaa\_ d3n35a\_ d3ubra\_ d1qo8a1 d1d4ca1 d2k3va\_ d1ft5a\_ d1qdba\_  
d1m1qa\_ d2j7aa\_ d1h21a\_ d1ogyb\_ d4fasa\_ d1jnia\_ d1oaha\_ d1sp3a\_  
d3h33a\_ d1rwja\_ d19hca\_ d1os6a\_ d3bxua\_ d3h4na\_ d1i77a\_ d3caoa\_  
d1j0pa\_ d2ctha\_ d1duwa\_ d1ofwa\_ d2e84a\_ d1hh5a\_ d1gyoa\_ d3h34a\_  
d1dszb\_ d1a6ya\_ d3cbba\_ d1ynwa1 d1r4ia\_ d1hcqa\_ d2hana\_ d2hanb\_  
d2enva1 d1kb4b\_ d2n11b\_ d1l01a\_ d1cita\_ d2dara2 d2dara1 d1wyha2  
d2dloa2 d1rutx4 d1rutx3 d2cuqa2 d1x41a2 d1x41a1 d1x3ha2 d1x3ha1  
d2d8za1 d1x61a2 d1x6aa1 d1x6aa2 d2cora2 d2cora1 d1v6ga1 d1v6ga2  
d2d8za2 d1x64a1 d1x64a2 d1b8ta1 d2co8a1 d1x63a2 d2dj7a2 d2dj7a1  
d2cu8a2 d2cu8a1 d1g47a2 d1g47a1 d1j2oa1 d1wyha1 d2dloa1 d1wiga1  
d1wiga2 d2cupa2 d2cupa3 d1x68a1 d2d8ya2 d2d8ya1 d1m3va2 d1x62a1  
d1x68a2 d1x61a1 d1b8ta3 d1b8ta2 d2d8xa2 d2d8xa1 d1x4ka1 d1x4ka2  
d2cuqa1 d1m3va1 d2co8a2 d1j2oa2 d1x63a1 d2cura1 d2cura2 d1x62a2  
d2aq2b1 d1enfa1 d1i4pa1 d1v1oa1 d1et9a1 d1esfa1 d2g9hd1 d4ohja1  
d1klud1 d1bxta1 d1eu3a1 d1ty0a1 d1fnua1 d2qaln1 d1d4ua2

**Family-21 (b.6.1.1)**

**Positive dataset contains 6 protein sequences.**

d1ws8a\_ d3u25a\_ d2iaac\_ d4dplx\_ d2gima\_ d2i7sa\_

**Negative dataset contains 3996 protein sequences.**

d1m32a\_ d1libja\_ d1c7na\_ d1iuga\_ d4q75a\_ d2bkwa1 d1t3ia\_ d1qz9a\_  
d1jf9a\_ d1eg5a\_ d1p3wa\_ d3kgwa\_ d1c11a\_ d2ctza1 d1vjoa\_ d2rfva\_  
d1gc0a\_ d1cs1a\_ d1d2fa\_ d2ch1a1 d1qgna\_ d1pffa\_ d1elua\_ d1u08a\_  
d11c5a\_ d1b5pa\_ d2ay1a\_ d1bw0a\_ d3pd6a\_ d7aata\_ d2csta\_ d1j32a\_  
d4wlha\_ d1o4sa\_ d1v2da\_ d1gdea\_ d1m6sa\_ d1v72a1 d1svva\_ d1ajsa\_  
d1wsta1 d2f8ja2 d11k9a\_ d1vp4a1 d1xi9a1 d2gb3a1 d1yaaa\_ d1xkla\_  
d2wfla\_ d2cfba1 d1dfoa\_ d1o69a\_ d1bj4a\_ d3k28a\_ d2bwpa\_ d3lg0a\_  
d2fnua\_ d3ou5a\_ d1z7da1 d1b9ha\_ d1iaya\_ d4msoa\_ d1bs0a\_ d1s0aa\_  
d1sffa\_ d3tqxa\_ d1mdoa\_ d3qboa\_ d3pgya\_ d1bjna\_ d2dkja\_ d1ejia\_  
d1vefa1 d4wxga\_ d3bs8a\_ d3gbxa1 d1w23a\_ d4nmwa\_ d1cixa\_ d1y29a\_  
d1v7fa\_ d2jtba\_ d1g9pa\_ d1lupa\_ d1qk7a\_ d1mb6a\_ d2a2va\_ d1niya\_  
d1i25a\_ d1hvwa\_ d2mpqa\_ d1ie6a\_ d1kqha\_ d1la4a\_ d2mxoa1 d1dl0a\_  
d1koza\_ d1qk6a\_ d1emxa\_ d1lqra\_ d1c6wa\_ g1f8v.1 d1novc\_ d2bbvc\_  
d1ny721 d1ny722 d1a6ca3 d1a6ca2 d1a6ca1 d1pgl22 d1pgl21 d1pgl11  
d1ny711 d3sxwa1 d1j3qa\_ d4luka\_ d1a3qa1 d1iknc\_ d3brda1 d1p7h11  
d1oy3c\_ d1imhc1 d1gjia1 d1zk9a1 d2cxka1 d2bema\_ d1pama1 d1ea9c1  
d1qhoa1 d2fhfa2 d2fhfa1 d1k3ia1 d1j0ha1 d1cxl1a1 d2bhua1 d1edqa1  
d1f1sa2 d1ut9a2 d1gvia1 d1txka1 d2ph1a1 d1fxza2 d1fxza1 d1lrha\_  
d1uija1 g1dgw.1 d2v09a\_ d1uika2 d1uika1 d1dgwa\_ d1lep0a\_ d2pa7a1  
d1wlta1 d1nxma\_ d2c0za1 d1ds6b\_ d1fstb\_ d1g0da1 d4w9ta\_ d1jvna1  
d4x2ra1 d1ka9f\_ d4axka1 d1thfd\_ d1h5ya\_ d4u28a\_ d2y88a\_ d4wd0a\_  
d1vzwa1 d2bjca1 d2hsga1 d1qpza1 d1k9ua\_ d2opoa\_ d1ydwa2 d2nvwa2  
d1h6da2 d1zh8a2 d1xeaa2 d1tlta2 d1r0ka3 d1j5pa3 d1vkoa2 d1vm6a2  
d3qvsa2 d1gr0a2 d1p1ja2 d3gpdg2 d2q49a2 d1hdgo2 d2g17a2 d2cvoa2  
d2czca1 d3pwka2 d1obfo2 d1i32a2 d1zyao2 d2pkqo2 d1b7go2 d2hjsa2  
d1cf2o2 d1vkna2 d1nvmb2 d1ux8a\_ d1dlya\_ d4i0va\_ d2bkma\_ d1dlwa\_  
d2bmma\_ d2msya\_ d2djoa1 d2r5za\_ d1au7a1 d1f43a\_ d2lmda1 d1akhb\_  
d1s7ea1 d3nara\_ d1zq3p1 d2craa1 d1mija\_ d4uuta\_ d3a01a\_ d1x58a1  
d3rkqa1 d3cmya1 d2cqxa1 d2da6a1 d1e3oc1 d1fjla\_ d1mh3a1 d1ig7a\_  
d1x41a1 d1wh7a1 d1gt0c1 d2mw8a\_ d1lfup\_ d1x2ma1 d1b72a\_ d1wi3a1  
d1wjha1 d1x2na1 d1mnmc\_ d2cuea1 d3k2aa\_ d2hosa\_ d2jwta2 d1pufa\_  
d1octc1 d2hi3a\_ d1b8ia\_ d4j19a\_ d3lnqa\_ d1wh5a1 d1b8ib\_ d1fexa\_  
d2cqra1 d1guua\_ d1ug2a1 d2cqqa1 d2ajea1 d4a69c\_ d1h8ac1 d2crga1  
d2iw5b1 d1xc5a1 d1ofcx1 d2cu7a1 d1wgxa1 d2cjja1 d2ckxa1 d1hcra\_  
d1tc3c\_ d1u78a2 d1xg1a1 d3lv8a\_ d1s3ga1 d1zaka1 d1s4qa\_ d3tvta2  
d1uf9a\_ d1khta\_ d1ckea\_ d1osna\_ d1p5zb\_ d4tmka\_ d3cm0a\_ d1tmka\_  
d1jaga\_ d3h86a\_ d1t0hb\_ d1nn5a\_ d2h92a\_ d3kb2a1 d2c95a1 d1yj5a2  
d1kgda\_ d1ly1a\_ d2ak3a1 d1vyva2 d1deka\_ d2grja1 d1p3ja1 d1y63a\_  
d1e4ya1 d1s96a\_ d3iija1 d1lvga\_ d1nksa\_ d1vyua2 d4e22a\_ d1qf9a\_  
d1jjva\_ d1q3ta\_ d1ki9a\_ d1lw7a2 d1teva\_ d1kjwa2 d1z0ja1 d3umra2

d3gj0a1 d2gaoa1 d1yzga1 d1x3sa1 d1g7sa4 d1puja\_ d1udxa2 d1kk1a3  
d2o52a\_ d1jwyb\_ d1zcaa2 d1zcba2 d2fv8a1 d2cjwa\_ d3dz8a1 d1xzpa2  
d1vg8a\_ d4qxaa\_ d2ew1a1 d1x1ra1 d2bcgy\_ d3doea1 d3cona\_ d3rega\_  
d3wyga\_ d1upta\_ d2b6ha1 d1zd9a1 d1lnza2 d1r5ba3 d1n0ua2 d1r2qa\_  
d2f91a1 d2rhda\_ d3q3jb\_ d3q85a\_ d1efma1 d1r8qa\_ d2gf9a1 d2akab1  
d1ek0a\_ d1z08a1 d2gcoa1 d2dy1a2 d4g01b\_ d2cxxa1 d1svia\_ d3q72a\_  
d1ni3a1 d4ac9a4 d2erxa1 d2bmea\_ d1wxqa1 d2gf0a1 d4ldja1 d1zunb3  
d1d5ca\_ d4lv5b\_ d1efca3 d1kmqa\_ d2g6ba1 d3lrpa\_ d1tada2 d2y8ea\_  
d4rd4a1 d1z06a1 d2heia\_ d3a58b\_ d1u01a2 d1d2ea3 d1zj6a1 d2ocba\_  
d3rwoa\_ d1mr3f\_ d2e9sa1 d4u5xa1 d2iwra\_ d2fn4a1 d3bwdd\_ d2nzja1  
d2atva1 d2ksqa\_ d3l43a\_ d1mkya2 d1mkya1 d1wmsa\_ d1jnja3 d2rmka\_  
d1f6ba\_ d1f60a3 d1gota2 d1jala1 d2fh5b1 d1g16a\_ d2wblc\_ d1m7ba\_  
d1wf3a1 d1f5na2 d1t9ha2 d1z6xa1 d1z0aa1 d2fg5a1 d2a5ja1 d2bcjq2  
d1s0ua3 d1ky3a\_ d4y0va\_ d4lhwa\_ d2qmea1 d2atxa1 d1legaa1 d1ryha\_  
d1moza\_ d1nrjb\_ d2erya1 d3bfka\_ d1puia\_ d3j3az1 d3t5ga\_ d1shza2  
d3defa\_ d2f7sa1 d3raba\_ d3tsoa\_ d3aq4a\_ d2a17a1 d3sfva1 d3bc1a\_  
d2ncda\_ d1sdma\_ d3h4sa1 d2heha\_ d2grya\_ g3kin.1 d1kk8a2 d1br2a2  
d1goja\_ d1f9va\_ d2mysa2 d1lkxa\_ d3t0qa\_ d4db1a1 d3gbja\_ d1v8ka\_  
d1y4wa1 d3vrda1 d3vrda2 d1fcdc1 d1h1oa2 d1h1oa1 d1m70a2 d1m70a1  
d1ig8a1 d1czan2 d1czan1 d1ig8a2 d1czan4 d1bg3a4 d1bg3a3 d1bg3a2  
d1bg3a1 d3h3no1 d3h3no2 d3ezwa2 d1hroa\_ d4gedb\_ d3zooa\_ d1mz4a\_  
d1gu2a\_ d1f1fa\_ d1dvva\_ d1c6ra\_ d1c75a\_ d1e29a\_ d1gdva\_ d1cnoa\_  
d1co6a\_ d2bh4x\_ d2aiua\_ d5cytr\_ d1jdl\_ d1i8oa\_ d2zboa\_ d3dmia\_  
d1ls9a\_ d1wvec\_ d2yk3a\_ d3ph2b\_ d1dw0a\_ d5aura\_ d1ql3a\_ d1qn2a\_  
d1f1ca\_ d4zzva\_ d2xspa\_ d1eg1a\_ d4v20a\_ d1ojja\_ d4ipma1 d1gpia\_  
d4csia\_ d3pfza\_ d3ovwa\_ d2yoka\_ d2nqya\_ d1h4ga\_ d1hixa\_ d1oa2a\_  
d1olra\_ d3b7ma\_ d4h7ma1 d3wp3a\_ d2vgda\_ d1igoa\_ d3zsea\_ d2nlra\_  
d3wx5a\_ d1oa3a\_ d1pvxa\_ d1m4wa\_ d1f5ja\_ d1oa4a\_ d4ixla1 d2ah2a1  
d1evsa\_ d1cnt1\_ d1pvhb\_ d1z7ca\_ d1huwa\_ d1bgea\_ d1rhga\_ d1f6fa\_  
d1f45b\_ d1ilrb\_ d1axia\_ d1etea\_ d3tgxb\_ d2z3qa1 d3qb1a\_ d1hula\_  
d1m48a\_ d4nkqb\_ d1eera\_ d1v7mv\_ d5e4ea\_ d2o27a\_ d3b5ka\_ d2psma1  
d4zf7a\_ d3uf5a\_ d4x51a\_ d1d9ca\_ d4ypgc1 d3oq3a\_ d1lqsl\_ d1n1fa\_  
d1aula\_ d1wu3i\_ d3bes1\_ d3ux9a\_ d1v8fa\_ d2ejca\_ d3muea1 d3q12a1  
d3rbaa\_ d2qtra\_ d1nupa\_ d3l92a\_ d1f9aa\_ d1qjca\_ d2h29a\_ d1vlha\_  
d1od6a\_ d1lw7a1 d4ruka\_ d3wdpp1 d3wq5a\_ d1gnxa\_ d4gxpa\_ d4hz8a\_  
d1e4mm\_ d3aiua\_ d1wcga1 d1qvba\_ d3ahxa\_ d1v02a\_ d2dgaa\_ d1pbga\_  
d1vffa1 d1qoxa\_ d4ha4a\_ d2e17a\_ d1iq0a2 d1irxa2 d1r6ta2 d1livsa4  
d2cyba\_ d1rqga2 d1j09a2 d2yxna\_ d1f7ua2 d1h3fa1 d1ffya3 d2g36a1  
d1nzja\_ d1jila\_ d1n3la\_ d1i6la\_ d1pfva2 d1h3na3 d3n9ia\_ d3sz3a1  
d3sw2a\_ d1moxc\_ d1dx5i3 d1edmb\_ d1aut12 d1aut11 d1dval1 d1szba2  
d1kigl\_ d2y5fl\_ d1ijqa2 d1gk5a\_ d1g1sa2 d1nt0a3 d1xdtr\_ d1lmja2  
d1lmja1 d1nzia2 d2wphe\_ d1klil\_ d1pfx12 d1pfx11 d1p9ja\_ d1g1ta2  
d1f7ea\_ d4yzub\_ d2mgpa1 d1b9wa1 d1b9wa2 d2mgpa2 d1ob1c2 d1n1ia2  
d1n1ia1 d2npra2 d2npra1 d1m1xb4 d2y5ia\_ d1qlsa\_ d3n22a\_ d2egda\_



d4ggfc\_ d2wcea\_ d2luca\_ d4aqia\_ d3nsia\_ d2lp3a\_ dlj55a\_ d1a4pa\_  
d1k8ua\_ dlntsha\_ dllexra\_ d1tiza1 d1nyaa\_ dlq8ia\_ dlggwa\_ dlwdcc\_  
d3fwba\_ dlggza\_ d2o5ga\_ d1ctaa\_ d1m45a\_ d3i5gc\_ d1s18a\_ d1fpwa\_  
d2scpa\_ d2roaa\_ d4aqra\_ d3pn7b\_ d1br1b\_ d2mysb\_ d1s6ca\_ d1bjfa\_  
d2obha\_ dljfk\_a\_ dljfoa\_ d1qv0a\_ d1lkja\_ d2mlfc\_ d2m97a\_ d2d8na\_  
d4by5a\_ dljbaa\_ d4nqga\_ dlwdcb\_ d2mysc\_ dlj7qa\_ d1s6ia\_ dluhka2  
dlr2ua\_ dl dtla\_ d3kf9a\_ d3pn7c\_ dlqjta\_ d1c07a\_ dlgjya\_ dl1y1a\_  
dlhqva\_ dl dvia\_ dl df0a1 d1qxp a2 d4usla\_ d1k94a\_ d1sfsa\_ dljfxa\_  
dlwkya2 dl uuqa\_ d3wh9a\_ d4mlra\_ dlxyza\_ d4xuya\_ d2je8a5 d4bf7a1  
d3cuia\_ dlur4a\_ dlqw9a2 dlodza\_ d2vzsa5 dl bqca\_ d2x2ya1 dlhjqa\_  
dlqnra\_ d4y7ea1 dl vjza\_ d4k68a\_ d2v3ga\_ d4hpga\_ dl nofa2 dl nq6a\_  
dlh4pa\_ d1aq0a\_ d3ziza\_ d4bs0a\_ dlecea\_ dlh1na\_ dlta3b\_ dlw91a2  
dlilwa\_ dl uhva2 dl us3a2 dl egza\_ d7a3ha\_ dl tvna1 d3nyda1 dlghsa\_  
d2cyga1 d4xv0a\_ d2c8na2 dlw32a\_ d3emca\_ dl v6ya1 dl foba\_ d2uwfa1  
d2fgla\_ d3niya1 d2c0ha1 dl rh9a1 dl yq2a5 dl szna2 dl fa2a\_ dl pama4  
d5do8a1 dl ea9c3 dl hx0a2 d2fhfa5 dl qhoa4 dl avaa2 dl m53a2 d4m8ua1  
d2gjpa2 dl lwha2 d4howa1 dl ktba2 dl j0ha3 d3vm5a1 d2x1ia\_ dlwzaa2  
dluasa2 d2diea1 dl mxga2 dl ht6a2 dl eswa\_ dl iv8a2 d5cpsa\_ dlud2a2  
dlzjaa1 d3gbea1 dl kwga2 dl wdpa\_ dl gcya2 dl g5aa2 dl hvxa2 d3dhp a2  
d2bhua3 d4do4a1 d3qgva1 dl e43a2 dl g94a2 d2d3na2 dl gjwa2 dl gvia3  
dlx1na1 dl r7aa2 dl tz7a1 d3c8da2 d2pb1a1 dl jkma\_ dl jjia\_ dl jjfa\_  
d4c7ga2 d2gjxa1 dl jaka1 dl yhta1 d4toqa\_ dlwb0a1 dlw9pa1 dl eoka\_  
dlitxa1 dl kfwa1 dl goia2 dl edqa2 d2gsja\_ dl hjxa1 dl jnda1 dl vf8a1  
dl etob\_ dl g2ha\_ dl h6ua1 dl g4ma1 dl g4ma2 dl x14a1 dl n9pa\_ d3vsqa\_  
d2gixa1 dl b9ra\_ dl offa\_ d3wcqa\_ dl e9ma\_ dl l15pa\_ dl wria\_ dl i7ha\_  
d3av8a\_ dl czpa\_ dl rfka\_ d3p1ma1 d3b2ga\_ d2bt6a2 dl wgqa1 dl v89a1  
d2coda1 dl zc3b\_ dl wg7a1 dl u5ea1 dl v61a1 d2coca1 d2ys1a1 dl v5pa1  
dl ntya2 dl wjma1 dl wila1 dl u29a\_ dl xx0a1 dl unqa\_ d2zkmx3 dl fhoa\_  
dlv88a1 d2adza1 dl x1fa1 dl p6sa\_ d2coaa1 dl btka\_ dl v5ma1 dl faoa\_  
d2x18a\_ dl dyna\_ dl x1ga1 d4kaxb\_ d2j59m1 dl xcga2 dl txd a2 dl u5da1  
dl dbha2 dl w1ha\_ dl upqa\_ dl v5ua1 dl foea2 d2fjla1 dl eaza\_ d2dfka2  
d2cofa1 dl kz7a2 dl d4ua2 d9ldta1 d2ewda3 dl up7a1 d2dfda1 dl s6ya1  
dl vjta1 d7mdha1 dl hyea1 dl t2da1 dl ojsa3 dl b8pa1 dl l1dna1 dl hyha1  
dl civa1 d2a92a1 dl ez4a1 dl i0za1 dl y6ja1 dl gv0a1 dl l1lda1 dl obba1  
dlv8ba1 dl gdha1 dl l17da1 d2dlda1 dl mx3a1 dl ygya1 dl qp8a1 dl j4aa1  
d2naca1 dl npya1 d3t4ea2 dl a4ia1 dl o0sa1 d2hk9a2 d2egga2 dl b26a1  
dlbvua1 dl gq2a1 dl c1da1 dl leha1 dl gtma1 dl euza1 dl nvt a1 d3dona2  
dl edza1 dl vi2a1 dl p77a1 dl nyta1 dl b0aa1 dl v16a1 dl v91a1 dl txga2  
d3f47a1 dl mv8a2 d2pv7a2 dl xc2a3 d2ahra2 d4xiya1 d2f1ka2 dl pgja2  
dl i36a2 dl np3a2 dl l1j8a4 dl teaa3 dl qmga2 d2i76a2 d2g5ca2 dl wdka3  
dl dlja2 d3cuma3 dl kola2 dl f8fa2 dl qora2 dl jqba2 dl vj0a2 dl cdoa2  
dl gu7a2 dl d1ta2 dl xa0a2 d2dm6a2 dl jvba2 dl rjwa2 dl llua2 dl h2ba2  
dl tt7a2 dl piwa2 dl o89a2 dl iz0a2 dl e3ja2 dl yb5a2 dl uufa2 dl vj1a2  
d3gpdg1 dl vc2a1 d2nvwa1 dl u8fo1 dl ydwa1 dl hdgo1 d2g17a1 dl cf2o1

d2czca2 d1r0ka2 d1obfo1 d2cvoa1 d1ebfa1 d1h6da1 d1i32a1 d1zh8a1  
d2q49a1 d1qkia1 d1j5pa4 d3pzra1 d1xeea1 d1vkoa1 d1vm6a3 d3qvsal  
d2pkqo1 d1b7go1 d1gr0a1 d1p1ja1 d1lc0a1 d1j0xo1 d3pwka1 d2hjsa1  
d1zyao1 d1vkna1 d1t1ta1 d1nvmb1 d3sjua\_ d3ojfa1 d1xu9a1 d2jjya1  
d1n7ha\_ d1y1pa1 d1h5qa\_ d1jtva\_ d4fs3a\_ d2bkaa1 d1gy8a\_ d2c5aa1  
d1ulsa\_ d1ooea\_ d2b69a1 d1y5ma1 d1spxa\_ d1ae1a\_ d1bxka\_ d1ydea1  
d1gega\_ d1hdoa\_ d1o5ia\_ d1e6ua\_ d1snya1 d2rhca\_ d3zv4a\_ d5ceja\_  
d2d1ya1 d1fjha\_ d3w8ea\_ d2fmua1 d1x1ta\_ d1rpna\_ d3ay7a1 d1k2wa\_  
d1eq2a\_ d2hrba1 d3ruaa\_ d2ew8a1 d4hwka\_ d1xgka\_ d2bd0a1 d1yo6a1  
d2a35a1 d2ntva\_ d1v18a\_ d1hdca\_ d4bkua\_ d2ag5a1 d2q45a\_ d1nffa\_  
d4iy1a\_ d1zbqa1 d1kewa\_ d1ek6a\_ d1ja9a\_ d2q46a2 d1iy8a\_ d1cyda\_  
d2ptga\_ d1hxha\_ d1uzma1 d3lyla\_ d4m89a\_ d3wyea\_ d2b11a1 d1w6ua\_  
d1sb8a\_ d2q2va\_ d4nr0a\_ d1e6wa\_ d2gasa\_ d3oiga1 d2bgka1 d1mxha\_  
d1v10a1 d1rkxa\_ d1r6da\_ d1wmaa1 d1e7wa\_ d2c07a1 d1xkqa\_ d3tzha\_  
d1g0oa\_ d3lz6a\_ d1qyca\_ d1edoa\_ d1gz6a\_ d1oc2a\_ d1t2aa\_ d1zema1  
d2xoxa\_ d1z45a2 d1p33a\_ d3lt0a\_ d4e6pa\_ d2wyua\_ d1db3a\_ d4q9na\_  
d1xh1a\_ d4o1ma\_ d1fmca\_ d2uvda\_ d2gdza1 d1uaya\_ d2z1ma\_ d2o23a2  
d2fr1a2 d2fr1a1 d1qsga\_ d1qyda\_ d4zjua\_ d2a4ka1 d1ybl1a\_ d1wvga1  
d1yxma1 d3f4ba\_ d1mg5a\_ d1xg5a1 d1r55a1 d3gboa\_ d1atla\_ d1kufa\_  
d1buda\_ d4q11a\_ d1quaa\_ d1yp1a\_ d1wnia\_ d3nqyb\_ d4gera\_ d1bqba\_  
d1ex0a4 d1g0da4 d2f4ma1 d1x3za\_ d1qxp4 d1ziva1 d1zcmal d1t3ca\_  
d1epwa3 d2a97a\_ d3f1ea\_ g1e1h.1 d3ioqa\_ d1fh0a\_ d1o0ea\_ d1khqa\_  
d1m6da\_ d2cb5a\_ d1cs8a\_ g8pch.1 d1s4va\_ d2pnsa\_ d1vsna1 d1mira\_  
d1iwda\_ d2oula\_ d7pcka\_ d3bwka\_ d3bcna\_ d2p86a\_ d1pvja\_ d1pcia\_  
d1gece\_ d1deua\_ d4bs6a\_ d1xkga1 d1cqda\_ d1jqpa2 d2c0ya\_ d2bdza\_  
d3p5ua\_ d1zoya1 d1qo8a2 d1d4ca2 d1jnra2 d1kf6a2 d2jk6a2 d2jk6a1  
d1feca1 d1feca2 d1lpfa1 d1lpfa2 d1xhca1 d1xhca2 d1dx1a2 d1dx1a1  
d1gera2 d1m6ia2 d1onfa1 d1onfa2 d3lada2 d3lada1 d1w4xa1 d1w4xa2  
d1gesa2 d1mo9a1 d1xdia1 d1f12a2 d1f12a1 d1fcda1 d1fcda2 d1h6va2  
d1h6va1 d1mo9a2 d1gv4a2 d1gv4a1 d2gv8a2 d2gv8a1 d1aoga1 d1aoga2  
d1hyua1 d1ebda1 d1ebda2 d3dk9a1 d1q1ra2 d1q1ra1 d1pv8a\_ d1w5qa\_  
d2c1ha\_ d1oh1a\_ d1zbf1a\_ d2z1ha\_ d2etja1 d3qioa1 d1j11a\_ d2e41a\_  
d1j12a\_ d21sna1 d1lio2a\_ d1uaxa\_ d2yv0x\_ d1mu2a1 d1ekea\_ d1i39a\_  
d1pn0a1 d1reo1 d1ju2a1 d2f5va1 d3c96a1 d2gmha1 d1pj5a2 d1gpea1  
d1o5wa1 d1n4wa1 d2dw4a2 d2ivda1 d1seza1 d2voua1 d1kdga1 d1s5ja1  
d2hbja2 d2igia\_ d1wlja\_ d1qhta1 d4dle1a1 d1tgoa1 d2f96a1 d3tr8a1  
d3mxma\_ d1q8ia1 d1y97a1 d1w0ha\_ d1kfsa1 d2py5a1 d1noya\_ d1d5aa1  
d1yt3a3 d2guia\_ d3mwpa1 d4kb1a\_ d2v76a\_ d1wj1a1 d1aqca\_ d1qqga2  
d1qqga1 d1ntva\_ d1n3ha\_ d4dbba\_ d3f0wa1 d1p3ra\_ d1wgua1 d2cy4a1  
d3hqca\_ d1wvha1 d1xr0b1 d3nvva1 d1krha3 d2h88b1 d1t3qa2 d1kf6b2  
d1zoyb1 d1jq4a\_ d1ffva2 d1dgja2 d1rm6c2 d1k8ka2 d1k8ka1 d3uleb1  
d3i33a2 d3i33a1 d1bupa1 d1dkgd2 d1dkgd1 d4ci6a2 d1jcfa1 d4a2ba2  
d2fxua1 d1yaga2 d1yaga1 d4cbua2 d1bupa2 d1r7ha\_ d1faaa\_ d1wika1  
d1xfla\_ d1ttza1 d2f51a1 d1ti3a\_ d1nhoa\_ d1sena\_ d2i4aa\_ d1lep7a\_

d1zmaa1 d1fo5a\_ d3lefa1 d3diea1 d2yana1 d1z6na1 dloaza\_ d3zywa1  
d4aj8a\_ d1nm3a1 d4fiwa\_ d1wmja\_ d4hs1a1 d1iloa\_ d1xwaa1 d1wjka1  
d2vm1a\_ d1fb6a\_ d1gh2a\_ d1h75a\_ d1nw2a\_ d1kx5b\_ d3a6na\_ d4m6ba2  
d2nqbd\_ d3wkjd\_ d2yfwe\_ d4h9na\_ d5bnxa\_ d1kx5c\_ d3r45a\_ d1eqzb\_  
d4jjnb\_ d1f66c\_ d1eqza\_ d4wnnb\_ d1kx5a\_ d1u35c1 d1id3a\_ d2nqbc\_  
d1kx5d\_ d1um8a\_ d1ixza\_ d1qvra2 d1qvra3 d1qzma\_ d1sxjc2 d1jr3d2  
d2p65a\_ d1l8qa2 d3hu3a3 d1sxjd2 d1njfa\_ d1in4a2 d1sxja2 d1tuea1  
d2ce7a2 d1w5sa2 d1sxjb2 d1d2na\_ d1ny5a2 d1ofha\_ d2gnoa2 d2a5yb3  
d1fnna2 d1u0ja1 d1lv7a\_ d1iqpa2 d2fnaa2 d1ixsb2 d4gita\_ d1sxje2  
d1g41a\_ d1pd212 d1nhya2 d2a2ra2 d1k0dd2 d1f2ea2 d1gsua2 d1f3ba2  
d2fhea2 d2pvqa1 d1tw9a2 d1oyja2 d1e6ba2 d1k0ma2 d3ik7a1 d4is0a1  
d1r5aa2 d1j1va2 d1m0ua2 d3gtub2 d1z9ha2 d1okta2 d1axda2 d2gsra2  
d1tu7a2 d1k3ya2 d1zgma1 d1b48a2 d1gnwa2 d1gwca2 d2gsta2 d1glqa2  
d1oe8a2 d1pn9a2 d1v2aa2 d1fw1a2 d1duga2 d4ilya\_ d4olta\_ d1qgia\_  
d1sefa\_ d1sfna\_ d1sq4a\_ d1qqya\_ d1gd6a\_ d1f6ra\_ d1ivma\_ d2gv0a\_  
d1iiza\_ d2z2fa\_ d1j8xa\_ d1ghla\_ d1b9oa\_ d1741a\_ d169la\_ d2o4wa\_  
d1p37a\_ d1k28a3 d1xjta1 d1jtma\_ d2f2qa\_ d4e97a1 d3w3ea\_ d4tx7a\_  
d3cq1a\_ d4msta\_ d3iwra\_ d2z37a\_ d4dyga\_ d2pjsa1 d1klla\_ d2i7ra1  
d1ecsa\_ d1xqaa1 d5cj3a1 d1jifa\_ d2p7oa\_ d1r9ca\_ d1nkia\_ d1mpya2  
d1kw3b2 d1kw3b1 d4ghga1 d1tfza1 d3isqa1 d3isqa2 d1sqia1 d1sqia2  
d1lkda2 d1lkda1 d1mpya1 d1cjxa2 d1sp9b2 d1t47a1 d1t47a2 d1flua2  
d1sp8a1 d1sp8a2 d1flua1 d4iuaa3 d4bvva\_ d5hpga\_ d3k65a\_ d1ki0a3  
d1ki0a2 d1ki0a1 d1a0ha1 d1pmla\_ d3sp8a3 d2feba1 d1qsta\_ d2beia1  
d4m3sa\_ d1u6ma1 d1ygha\_ d1yk3a1 d3dr6a\_ d1xmta\_ d1z4ea1 d2ge3a1  
d1bo4a\_ d2fiaa1 d2jdca1 d1y9wa1 d3to7a\_ d1wwza1 d2fl4a1 d2ozua1  
d2b5ga\_ d2cy2a1 d2p0wa\_ d1cm0a\_ d4pswa\_ d1yrea1 d1yr0a1 d1m4ia\_  
d2gana1 d1yvka1 d1ghea\_ d2g3aa1 d1y7ra1 d2euia1 d1q2ya\_ d2fsra1  
d1xeba\_ d2ae6a1 d1cjwa\_ d1qsma\_ d2aj6a1 d1y9ka1 d1i12a\_ d1vkca\_  
d2atra1 d1n71a\_ d2d4pa1 d2fiwa1 d2fe7a1 d1tiqa1 d2ou2a\_ d1yx0a1  
d2fcka1 d1p0ha\_ d2j8ma\_ d2pq8a\_ d1z4ra1 d1s3za1 d1ufha\_ d1xvqa1  
d1pn0a2 d3hy2a\_ d2cvba1 d1o8xa\_ d1lu4a\_ d1we0a1 d2bmxa1 d2a4va1  
d1psqa\_ d1xiya1 d1q98a\_ d1n8ja\_ d1zofa1 d2ggta\_ d3tjja\_ d4je1a1  
d3s9fa\_ d2zcta\_ d1qmva\_ d1jfua\_ d2b1ka\_ d5dvba1 d2b5xa1 d2v2ga\_  
d1st9a\_ d3tb2a\_ d4llra\_ d4fh8a1 d1e2ya\_ d1knga\_ d2h30a\_ d1i5ga\_  
d2z9sa\_ d2f8aa1 d1tp9a1 d2b7ka\_ d1nm3a2 d3hvva\_ d2wfca1 d4kcea\_  
d1xvwa1 d4gqca1 d3qpma\_ d4k1fa\_ d1zzoa1 d1gp1a\_ d1prxa\_ d4od7a1  
d1z6ma1 d4mcua1 d4dvca1 d1r4wa\_ d3l9sa\_ d1un2a\_ d3rppa\_ d3l21a\_  
d2e1da\_ d1to3a1 d1w3ia\_ d1sfla\_ d1n7ka\_ d1vcva1 d4imea\_ d1wa3a\_  
d2ocza1 d1f2ja\_ d3m16a\_ d2yxga\_ d1ub3a\_ d3a5fa\_ d1fbaa\_ d1l6wa\_  
d1xfba1 d1wx0a1 d1vpxa1 d1ojxa\_ d1mxsa\_ d2a4aa1 d1xkya1 d3cq0a1  
d3s1xa\_ d1f05a\_ d1fdja\_ d3cpa1 d4d2ja\_ d4mh8a\_ d4i7ga1 d1etha2  
d1w52x1 d2pp1a1 d1hpla2 d1lpbb2 d2oxea1 d1bu8a2 d1rp1a2 d1ysl1\_  
d4hs9a\_ d1ispa\_ d1ku0a\_ d3qmma\_ d1bnla\_ d1dy2a\_ d1ra6a\_ d1muka\_  
d3gsza\_ d1khva\_ d1te9a\_ d2xwha\_ d3uqsa\_ d3hkwa\_ d3n6ma\_ d2cjqa\_

d2xyma\_ dlteba\_ dlte8a\_ dls48a\_ dlu09a1 d4wfxa\_ d3tyqa\_ d2pgga1  
d1lgya\_ d4l3wa\_ d1llfa\_ dlgz7a\_ dlukca\_ d1svpa\_ dlmbma\_ d3su6a1  
d1cula1 d4agka\_ d1vcpa\_ dlq31a\_ gln11.1 d3e90b\_ d1ep5a\_ d3u1jb\_  
d3zxha\_ d1cgl\_ d1rm8a\_ d1eaka2 d1hy7a\_ d2jsda\_ d1cxva\_ d1hv5a\_  
d3p0ya1 d1lgra1 d1lgra2 d1n8yc2 d1m6ba2 d1m6ba1 d1m4la\_ d2bk7a\_  
d3fjua\_ d1z5ra1 d1uwya2 d1jqga1 d2c1ca1 d1dtda\_ d1h8la2 d1ddla\_  
d1e57b\_ d1auyb\_ d1js9c\_ d1f15b\_ d1za7a\_ d1laja\_ d1rypd\_ d1lirua\_  
d1rypc\_ d3unfk\_ d1rypa\_ d1j2pa\_ d1lirui\_ d1j2qh\_ d3unfh\_ d1m4ya\_  
d1rypb\_ d1lirul\_ d1lirug\_ d1liru2\_ d1q5rh\_ d1rypg\_ d1liruf\_ d1q5qa\_  
d1e94a\_ d1lirub\_ d1lryph\_ d3ty6a\_ d1liruj\_ d1liruk\_ d1rype\_ d1lirud\_  
d1lirue\_ d3mi01\_ d1rypf\_ d1liruh\_ d2z3ba\_ d1liruc\_ d3mka2\_ d1liru1\_  
d1e88a1 d1l6ja5 d1l6ja4 d1eaka4 d1eaka3 d1h8pa2 d1h8pa1 g1gk9.1  
g1or0.1 g1e3a.1 d1mqta\_ d1d4m3\_ d1fmd3\_ d2mev1\_ g1aym.1 d1ev13\_  
d4q4w1\_ d1r1a3\_ d2x5ia\_ d1rhi1\_ g1r1a.1 g1d4m.1 g1rhi.1 d1b35b\_  
d1loopa\_ d1tme1\_ d4iv1a\_ g1pvc.1 g1fpn.1 d1fpn1\_ d4gb31\_ d1d4m1\_  
d1fmd1\_ d1ev11\_ d2wzr3\_ g1cov.1 d1qqp3\_ g1fmd.1 d2x5ic\_ d1rhi3\_  
g1oop.1 d1hxs1\_ g1hxs.1 d1fpn3\_ d1bev1\_ g2mev.1 d1eah3\_ d1aym1\_  
d1pvc3\_ d1qqp1\_ d1zba3\_ d1h8ta\_ d3vbhc\_ g1b35.1 g1bev.1 d1hxs3\_  
g1ev1.1 d1bev3\_ g1tmf.1 d1tmf1\_ d1b35a\_ d2mev3\_ g1eah.1 g1h8t.1  
d1eah1\_ d4q4w3\_ d1r1a1\_ d1aym3\_ d1pvc1\_ d1zba1\_ d1h8tc\_ d1loopc\_  
d1tme3\_ g1qqp.1 d4iv1c\_ g1tme.1 d3ubub\_ d1legia\_ d1qo3c\_ d1v7pa\_  
d1tdqb\_ d3ubua\_ d1c3ab\_ d1h8ua\_ d3bx4b\_ d1t8ca1 d1sb2a1 d1qdda\_  
d2ziba1 d3cada\_ d1byfa\_ d1j34b\_ d1jwia\_ d1jzna\_ d1c3aa\_ d1oz7b\_  
d1wmza\_ d3bdwb\_ d1hq8a\_ d1fifa1 d1dv8a\_ d3hupa\_ d1wk1a1 d1lumra\_  
d2afpa\_ d3bx4a\_ d1gz2a\_ d1sl6a\_ d1v7pb\_ d3g8ka\_ d1ixxa\_ d1j34a\_  
d1jwib\_ d1g1sa1 d1y17a1 d1ja3a\_ d1fvub\_ d3bdwa\_ d1sb2b1 d1fvua\_  
d1umrc\_ d1oz7a\_ d4m17a\_ d3cfwa1 d1ypqa1 d1g1ta1 d3fd4a\_ d3l9jc\_  
d4dn8a1 d1v4lb\_ d1rdl1\_ d2msba\_ d4lt9a1 d3tc7a1 d3hoja\_ d1i4na\_  
d3vnda\_ d3n18a1 d1geqa\_ d3nav1 d1v5xa\_ d4a2ra1 d3tc6a1 d1ujpa\_  
d4ijba\_ d1xcfa\_ d1vc4a\_ d1rd5a\_ d1qopa\_ d3b5va\_ d2r80b\_ d1cqxa1  
d1cg5a\_ d1gcvb\_ d3boma\_ d2h8fb\_ d2raoa\_ d3bj1a\_ d4hrrb\_ d2r50a\_  
d3d1kb\_ d2aa1b1 d3zhwa\_ d3hf4b\_ d3gdja\_ d1jebb\_ d3bj1b\_ d1x9fb\_  
d1wmub\_ d1gcva\_ d3bcqb\_ d3d4xb\_ d2dc3a\_ d3hf4a\_ d4yu3a\_ d3k8ba\_  
d1qpwb\_ d2r80a\_ d3bcqa\_ d1v4wa\_ d3wtgb\_ d1jl7a\_ d4esaa\_ d1a9we\_  
d3d1ab\_ d1fsla\_ d4h2la\_ d1v4wb\_ d1mwca\_ d1vhba\_ d1jeba\_ d1spgb\_  
d1h97a\_ d1q1fa\_ d1tu9a1 d3d1aa\_ d1hdsb\_ d3hyub\_ d2zfb\_ d3fs4a\_  
d1oj6a\_ d1shrb\_ d4h2lb\_ d4yu3b\_ d1spga\_ d3hrwa\_ d3qqra\_ d3at5a\_  
d4wchd\_ d3hyua\_ d1cg5b\_ d1uc3a\_ d1hbra\_ d2raob\_ d1outb\_ d4esab\_  
d3gdjb\_ d3qqqa\_ d1x9fc\_ d3vrfa\_ d1litha\_ d3mkba\_ d3d4xa\_ d3mjpa\_  
d1jl6a\_ d3fh9a\_ d1outa\_ d2dc3b\_ d1lit2a\_ d3eoka\_ d3g46a\_ d1qpwa\_  
d3vrfb\_ d1ch4a\_ d1x9fd\_ d1hdsa\_ d2zfb\_ d3mkbb\_ d1or4a\_ d3wtga\_  
d1a4fa\_ d3fh9b\_ d3bomb\_ d3cy5a\_ d3at5b\_ d1x9fa\_ d2oifa\_ d4lmbx\_  
d1cpcb\_ d3v57a\_ d1kn1a\_ d1cpca\_ d4f0ta\_ d2vjha\_ d4po5b\_ d1eyxa\_  
d1alla\_ d4f0tb\_ d1b33b\_ d4h0mb\_ d1b33a\_ d2vjhb\_ d4lm6b\_ d2vmlb\_

d1allb\_ d2vjta\_ d3dbja\_ d2vmla\_ d2vjtb\_ d4f0ub\_ d1f99b\_ d4rmpa1  
d1liaa\_ d1eyxb\_ d2uulb\_ d4lmsb\_ d4f0ua\_ d2bv8a\_ d1f99a\_ d2bv8b\_  
d2c7lb\_ d3dbjb\_ d4rmpb1 d1b8da\_ d4h0ma\_ d3v57b\_ d1kn1b\_ d1liab\_  
d2uula\_ d2j96a\_ d1kyqa1 d1lazwa\_ d1mtza\_ d1k8qa\_ d2xqfa\_ d1ea5a\_  
d1f6wa\_ d1dx4a\_ d1qe3a\_ d1k4ya\_ d4qwwa\_ d2ha2a\_ d2shpa1 d1yfoa\_  
d1l8ka\_ d2ooqa1 d1g4us2 d1p15a\_ d1lara2 d1lara1 d1wcha\_ d2fh7a2  
d2fh7a1 d1gl9b1 d1gkub1 d1jmx1 d1pbya1 d1pbya2 d1jmx4 d1jmx3  
d1pbya4 d1s5ja2 d1qhta2 d4dlea2 d1tgoa2 d3py8a2 d1q8ia2 d1kfsa2  
d2py5a2 d1d5aa2 d1dosa\_ d3qm3a1 d2fjka\_ d2m5ta\_ d1cqqa\_ d1wqsa\_  
d5bpea\_ d2ipha\_ d1lvoa\_ d2bhga1 d3tnta\_ d3sjia\_ d3d23a1 d2fyqa\_  
d3tloa\_ d3zvea1 d2hrva\_ d3q3ya1 d4asha1 d1cg2a1 d1yloa2 d1y7ea2  
d1y0ya3 d1lfwa1 d1vixa1 d1fnoa4 d1vhoa2 d1ysja1 d1vhea2 d1z2la1  
d2fvga2 d1vgya1 d2grea2 d1xmba1 glq7l.1 d1rtqa\_ d3rp2a\_ glucy.1  
d1fuja\_ d2zchp\_ d3w94a\_ d1si5h\_ d1lo6a\_ g2pka.1 d1cgha\_ d1kigh\_  
d1a5ia\_ d3s9ba\_ d1hj8a\_ d1ao5a\_ d2anya\_ d1q3xa1 d1gvza\_ d1azza\_  
d4gsoa\_ d2f91a1 d1liau\_ d1gdna\_ d1eufa\_ glfiw.1 d1eq9a\_ d4nfea\_  
d2rdla\_ d1spja\_ d1elva1 d1a7sa\_ d1ekbb\_ d1pfxc\_ d1yc0a\_ d2aiqa\_  
glfiz.1 d1fi8a\_ d4k60a\_ d4dgja\_ d1mzaa\_ d1op0a\_ d3tjva\_ d1pytd\_  
d1sgfg\_ glgg6.1 d2eeka\_ glrtf.1 d1a0ja\_ d3g01a\_ d1pytc\_ d4e7na\_  
d1ddja\_ d1z8ga1 d2hlca\_ d1npma\_ d1brup\_ g1jou.1 d1sgfa\_ d1autc\_  
g2hnt.1 g1kdq.1 d1orfa\_ d3s69a\_ d4crga\_ d1fxya\_ d1bqya\_ d2ftba\_  
d1pmpa\_ d2rcqa1 d1fdqa\_ d4lkpa\_ d1sa8a\_ d1vyfa\_ d1lpja\_ d3vg7a1  
d4azqa1 d1o8va\_ d5bvqa\_ d1p6pa\_ d2qo4a\_ d1opba\_ d1yiva1 d1o1va\_  
d4bvma1 d4tkba\_ d4i3ba\_ d1ftpa\_ d1ggla\_ d4gkca\_ d1cbia\_ d3p6da1  
d1kqwa\_ d2a0aa1 d1dzka\_ d4tlja\_ d2a2ua\_ d4wfva\_ d3t1da\_ d4iaxa\_  
d3zq3a\_ d2nnda\_ d1i4ua\_ d1kxoa\_ d1bbpa\_ d1kt7a\_ d1exsa\_ d3s26a1  
d1lf7a\_ d4gh7a\_ d1z24a1 d1qabe\_ d1xkia\_ d1ew3a\_ d3bx7a\_ d4iawa1  
d1n0sa\_ d1gkab\_ d3kzaa\_ d2k23a\_ d2l9ca1 d2joza1 d1gm6a\_ d3kffa\_  
d3saoa1 d1e5pa\_ d1yupa1 d1iiua\_ d4lu0a\_ d1of8a\_ d3unda1 d3e9aa1  
d1vr6a2 d1n8fa\_ d2qkfa\_ d1d9ea\_ d1o60a\_ d1e69a\_ d1mv5a\_ d3g60a4  
gl1i8.1 d1ewqa2 d1ji0a\_ d1qhla\_ d1v43a3 d2wmfa1 d1vpla\_ d1g2912  
d4a82a2 glf2t.1 d2d62a1 d3tuic1 d2bbsa1 d3g60a3 d2ixea\_ d1g6ha\_  
d1sgwa1 d2qi9c\_ d3rlfa1 d3b60a1 d3d31a2 d2pzea1 glxew.1 d1jj7a\_  
d1oxk2 d2onka1 d1wlwa\_ d1iwea\_ d1qf5a\_ d1vmaa2 d1nija1 d1np6a\_  
d2p67a1 d3ihla\_ d1okkd2 d1ls1a2 d1s1ma2 d1liona\_ d2v40a\_ d3hida\_  
d2vola1 d2g0ta1 d1vcoa2 d1j8mf2 d1g3qa\_ d1xjca\_ d1p9ba\_ d1qzxa3  
d1lihua2 d1lihua1 d2qm8a\_ d1dj2a\_ d4ioja\_ d1cp2a\_ d1yrba2 d1hyqa\_  
d3gqba2 d1skye3 d1xp8a1 d1tf7a2 d1tf7a1 d1ye8a1 d1skyb3 d2qe7d2  
d4blta\_ d4huta\_ d3l1daa2 d4hyya\_ d2i3ba1 d1crla\_ d3j9tb2 d3ntua2  
d1vdza1 d2z43a\_ d1e9ra\_ d1nlfa\_ d3ziaa2 d1n0wa\_ d1g6oa\_ d3ziad2  
d3j9ta2 d3gqbb2 d2i49a\_ d1nnfa\_ d1xvxa\_ d1ursa\_ d1h3da1 d1iuda\_  
d4m1va1 d1twya\_ d3e13x\_ d2nxoa1 d4pfua\_ d3ttma\_ d1elja\_ d2qmwa1  
d1us5a\_ d1y3na1 d1jeta\_ d1uqwa\_ d4f19a1 d2esna2 d3thia\_ d3fasa1  
d2uyeb\_ d2xwva1 d1r9la\_ d2fyia1 d1pb7a\_ d2ozza1 d1sw5a\_ d1nh8a1

d1vr5a1 d2g29a\_ d1xs5a\_ d3lswa\_ d2z23a\_ d3w9va\_ d3tcha\_ d1q35a\_  
d1z7me1 d3q27a\_ d1p99a\_ d1ve4a1 d2i6ea1 d4mcoa1 d4n8ya\_ d1eu8a\_  
d1zba1 d1ixca2 d1j1na\_ d1xvya\_ d1y9ua\_ d2z22a1 d1xoca1 d4oera\_  
d1wdna\_ d5f1qa1 d1xt8a1 d1i6aa\_ d4gwoa\_ d4igta1 d1pc3a\_ d4mmpa1  
d1o63a\_ d2cz1a1 d2onsa2 d4mija1 d1eh3a\_ d3skpa\_ d1dtza1 d1dtza2  
d1ieja\_ d1jnfa2 d1ce2a1 d1jnfa1 d1b1xa2 d1b1xa1 d1jw1a1 d1jw1a2  
d1ryoa\_ d1h76a1 d1h76a2 d1c4oa1 d2p6ra3 d2p6ra4 d1oywa2 d1oywa3  
d1wrba1 d1w36b2 d1w36b1 d1c4oa2 d3bora\_ d1t6na\_ d2eyqa5 d2eyqa3  
d2eyqa2 d2zu6a2 d1veca\_ d1uaaa1 d1w36d1 d2g9na1 d1z3ix2 d2rb4a\_  
d1hv8a1 d1hv8a2 d1t5ia\_ d1w36c2 d2j0sa2 d2j0sa1 d3hjha1 d1z5za1  
d1qdea\_ d1z63a1 d1s2ma2 d1s2ma1 d1wp9a1 d1wp9a2 d1gm5a3 d1gm5a4  
d3dina4 d3dina3 d1q0ua\_ d1w36c1 d1z3ix1 d1nkta3 d1nkta4 d1uaaa2  
d1w36d2 g1qhh.1 d2fwra2 d2fwra1 d2v8ta\_ d3q3ma\_ d1za0a1 d2inca\_  
d1jk0a\_ d2incb\_ d1mhyb\_ d3hf1b\_ d1mtyb\_ d1r2fa\_ d2uw1a\_ d1mhyd\_  
d3n37a\_ d1afra\_ d1oquc\_ d1syya\_ d1mtyd\_ d2o1za\_ d1uzra\_ d1smsa\_  
d2fkza\_ d1zujal d1s3qa1 d2fjca1 d1z6om1 d1veia\_ d4dyya\_ d1jiga\_  
d3gvya\_ d2pyba\_ d4cy9a1 d3bvfa1 d1r03a\_ d2cf7a\_ d1nf4a\_ d1zs3a1  
d4iwka\_ d3ka8a\_ d3np0x\_ d1n1qa\_ d1l1b3a\_ d4e6ka\_ d1z6oa1 d2fzfa1  
d4dyua\_ d3ge4a\_ d1jgca\_ d4am4a\_ d2z6ma\_ d1ji5a\_ d1vlga\_ d1lkoa1  
d3qz3a\_ d1o9ra\_ d2ffxj\_ d1euma\_ d1yv1a1 d2v2pa\_ d1j30a\_ d4di0a\_  
d1dpsa\_ d2qzxa\_ d2asia\_ d1psoe\_ d1miqa\_ d1smra\_ d2h6ta\_ d1pfza\_  
d1izda\_ d3hd8a\_ d1j71a\_ d1dpja\_ d4aa9a\_ d1t6ex\_ g1b5f.1 g1lya.1  
g1htr.1 d1qdma2 d1bxoa\_ d1wkra\_ d1tzsa\_ d1libqa\_ d2qzwa\_ d1ex4a2  
d1c6va\_ d1bdqa\_ d3ggta\_ d3ixoa\_ d1mrxa\_ d2haha\_ d1tw7a\_ d4njsa\_  
d1sgua\_ d2p3da\_ d1nsoa\_ d3d3ta\_ d2rkfa\_ d1c6ya\_ d3ogpa\_ d3ekwa\_  
d2o4na\_ d2j9ja\_ d1baia\_ d3ggua\_ d3lzua\_ d4npua\_ d4j55a\_ d2r8na\_  
d2fxda\_ d2p3ca\_ d4dqa\_ d3ttpa\_ d3t3ca\_ d2p3aa\_ d2hc0a\_ d2fdda\_  
d3mwsa\_ d1h4ra3 d4y18a1 d2a16a3 d1wgda1 d1wggal d4q5eb\_ d1wjna1  
d1se9a\_ d3n3kb\_ d1wz0a1 d1we6a1 d2m0xa\_ d2gbka\_ d3rt3b1 d1wh3a1  
d1sifa\_ d2ekec2 d4ii2b1 d4hk2a1 d1c3ta\_ d1m94a\_ d1wgha1 d1ttna1  
d1j8ca\_ d1wx8a1 d3v6cb1 d2ma9b\_ d4i61b1 d1bt0a\_ d2jvca1 d1iyfa\_  
d2k1fa\_ d1wxva1 d1wf9a1 d1t0ya\_ d2io0b2 d1x1ma1 d2gbma\_ d1zw7a1  
d2m17a\_ d1ud7a\_ d1we7a1 d2l1wpa\_ d2gbja\_ d1wjua1 d1v6ea1 d1v86a1  
d4eewa\_ d1wiaa1 d4icva\_ d4gu2a\_ d1wx7a1 d1wy8a1 d4hjka1 d2faza1  
d1v5oa1 d2a13a1 d2cr5a1 d1wj4a1 d1s3sg\_ d1jx4a2 d3gv5b1 d1t94a2  
d3bq0a2 d1qoza\_ d5ajha1 d3h33a\_ d1rwja\_ d19hca\_ d1os6a\_ d3bxua\_  
d3h4na\_ d1i77a\_ d3caoa\_ d1j0pa\_ d2ctha\_ d1duwa\_ d1ofwa\_ d2e84a\_  
d1hh5a\_ d1gyoa\_ d3h34a\_ d1iyka2 d1iyka1 d1rxta1 d1iica1 d1adqa1  
d1fnga1 d1uvqb1 d1zs8a1 d2vola1 d2vola2 d1mfb12 d2jelh2 d1luwel2  
d3qq4b1 d1kjvb\_ d1k5na1 d1osph2 d4odh12 d1ow0a1 d1ow0a2 d1bfob2  
d319ra2 d3jtth1 d2fath2 d4elkb2 d1fn4b2 d2xfxb\_ d1pg7x2 d4k71b2  
d11k2a1 d1eapb2 d41fhg2 d1i4fa1 d2nw2a2 d1kfah2 d1mhca1 d1h3ua1  
d1wejh2 d1h0db2 d1a5fh2 d1kcvh2 d1mjuh2 d1qqda1 d1kcrh2 d1k8ia1  
d3huja2 d2nnab1 d1nfd2 d3mffb2 d1s9va1 d11k3h2 d1q0x12 d1fv1b1

d1neza1 d4rfeb2 d1r3ha1 d1a6tb2 d1kjva1 d1pz5b2 d1onqa1 d2bc4a2  
d1de4a1 d1k8da1 d1tcra2 d1dn0b2 d1nfde2 d2xwtb2 d1bfoa2 d1mexh2  
d1iakb1 d1ypzf2 d4f7ea2 d1q72l2 d2fjbh2 d1fe8h2 d1clzh2 d1fngb1  
d1uvqa1 d1vgka1 d1c16a1 d4j12a2 d4x99b2 d1igtb3 d1je6a1 d1q72h2  
d1nldh2 d1teth2 d2hmic2 d1i1ca2 d1i1ca1 d1k8ib1 d1q0yh2 d1kfa12  
d3frua1 d1pg7w2 d1u58a1 d1igyb4 d1igyb3 d1hyrc1 d1klub1 d1deeb2  
d1c12b2 d2bc4b2 d2ig2h2 d1kcvl2 d3wn5b1 d1lk2b\_ d1lk3l2 d1mjul2  
d1sm3h2 d1q0xh2 d1zvsal d1ydpal d1u8ib2 d1ypze2 d1kcuh2 d2e3fa\_  
d1mm0a\_ d2e3ea\_ d2l1da\_ d2ny8x\_ d2e3ga\_ d2ny9x\_ d2nz3a\_ d2lj7a\_  
d1n4na\_ d2m8bb1 d2kyqa\_ d3psma\_ d1jxca\_ d2g1la\_ d1ugla\_ d4uj0a\_  
d2k4ua\_ d1hp2a\_ d2lu9a\_ d1baha\_ d2meoa1 d1wm7a\_ d1hlya\_ d1n8ma\_  
d1jlza\_ d1wpda\_ d1c55a\_ d1pvza\_ d1wt7a\_ d1rjia\_ d1wz5a\_ d1m2sa\_  
d1pjva\_ d1c49a\_ d1qkya\_ d2ktca1 d1wmta\_ d1du9a\_ d1j5ja\_ d1rlga\_  
d1xwdc1 d3kj4a\_ d1ozna\_ d1w8aa\_ d2ifga3 d1xkua\_ d1t0za\_ d2i61a\_  
d1t1ta\_ d1sn4a\_ d1kv0a\_ d2lkba\_ d1npia\_ d1wwna\_ d1pe4a\_ d2kbka\_  
d2li7a\_ d1djta\_ d2kbha\_ d1dq7a\_ d1sega\_ d1omya\_ d1zywa1 d1jzaa\_  
d1n9wa1 d1bbua1 d1c0aa1 d1b8aa1 d1l0wa1 d3a74a1 d1eova1 d1bvsa3  
d1iyjb4 d1iyjb5 d1iyjb3 d1o7ia\_ d4ipca1 d1x3ea\_ d4apva\_ d1jb7a1  
d1jb7a2 d1jb7a3 d3kdfa\_ d1ue1b\_ d1wjja1 d3eiva\_ d1xjva2 d1xjva1  
d2ccza2 d1se8a\_ d1l1oc\_ d1jb7b\_ d1qvca\_ d3ulla\_ d1qzga\_ d1miau4  
d1miau5 d1miau3 d1y14b1 d2nn6i1 d1i94l\_ d2zjra2 d1smxa\_ d2qamc2  
d1hh2p1 d2r7da1 d1rl2a2 d1wfga1 d3bzka4 d1x6oa2 d3a0ja\_ d2j01d2  
d2ja9a1 d4q15a\_ d1hr0w\_ d1luza\_ d2n3sa\_ d2vnud1 d1h95a\_ d1go3e1  
d2nn6h1 d1ne3a\_ d2mo1a\_ d1iz6a2 d1jjga\_ d1e3pa2 d2ix0a3 d2ix0a2  
d2lxja\_ d1ueba3 d1ueba2 d2z0sa1 d1u0la1 d2ix0a1 d2eifa2 d2je6i1  
d3i2za1 d2c35b1 d2ahob2 d1t9ha1 d3i4oa\_ d2qall1 d1jt8a\_ d2nn6g1  
d1g6pa\_ d3cama\_ d1i94q\_ d1c9oa\_ d1d7qa\_ d2ba0a1 d2vnud2 d2vnud3  
d1khia2 d2qalq1 d1wi5a1 d1xtda2 d1ny4a\_ d1dgsa2 d1fvial d1ckma1  
d1x9na2 d1pfsa\_ d2a1ka\_ d1je5a\_ d3azya\_ d3wvja\_ d1upsa1 d1ajoa\_  
d2hyka\_ d1ajka\_ d2vy0a\_ d1o4ya\_ d3o5sa\_ d3d6ea\_ d3atga\_ d1umza\_  
d3i4ia\_ d1c1la\_ d4lbqa\_ d1a78a\_ d1slta\_ d4no4a\_ d3zsjja\_ d3duia\_  
d1g86a\_ d1is3a\_ d1hlca\_ d1tdha3 d1q3ba3 d1ee8a3 d1k82a3 g1qmo.1  
g1len.1 d3zyra\_ d1fnaya\_ d1n47a\_ g2ltn.1 d1avba\_ d3usua\_ d1dhkb\_  
d1f9ka\_ d1lukga\_ d1g8wa\_ d1g9fa\_ d1wbfa\_ d3wcsa\_ d1g7ya\_ g1loe.1  
d1mvqa\_ d1hq1a\_ d1v6ia\_ d1dbna\_ d1qnwa\_ d1fx5a\_ d4l8qa\_ d1ioaa\_  
d3n35a\_ d3ubra\_ d1qo8a1 d1d4ca1 d2k3va\_ d1ft5a\_ d1qdba\_ d1mlqa\_  
d2j7aa\_ d1h21a\_ d1ogyb\_ d4fasa\_ d1jnia\_ d1sp3a\_ d2h0ba\_ d2erfa\_  
d1h30a2 d1h30a1 d3mw4a1 d1pz7a\_ d2r1ba\_ d3v64a1 d3bopa1 d3mw3a1  
d1okqa1 d1okqa2 d1wioa4 d1ccza2 d1vcaa1 d1dr9a2 d2d9qb1 d2nxyb2  
d2dara2 d2dara1 d1wyha2 d2dloa2 d1rutx4 d1rutx3 d2cuqa2 d1x4la2  
d1x4la1 d1x3ha2 d1x3ha1 d2d8za1 d1x61a2 d1x6aa1 d1x6aa2 d2cora2  
d2cora1 d1v6ga1 d1v6ga2 d2d8za2 d1x64a1 d1x64a2 d1b8ta1 d2co8a1  
d1x63a2 d2dj7a2 d2dj7a1 d2cu8a2 d2cu8a1 d1g47a2 d1g47a1 d1j2oa1  
d1wyha1 d2dloa1 d1wiga1 d1wiga2 d2cupa2 d2cupa3 d1x68a1 d2d8ya2

d2d8ya1 d1m3va2 d1x62a1 d1x68a2 d1x61a1 d1b8ta3 d1b8ta2 d2d8xa2  
d2d8xa1 d1x4ka1 d1x4ka2 d2cuqa1 d1m3va1 d2co8a2 d1j2oa2 d1x63a1  
d2cura1 d2cura2 d1x62a2 d1op9a\_ d1y0la1 d1etzb1 d1egj11 d2gsib1  
d1nj9a1 d4jfh1 d1aqk11 d1t2ja\_ d1lo4h1 d1zvya1 d3v4v11 d4enec1  
d1kxtb\_ d5e8ea1 d2pxya\_ d4weud\_ d1xiwc\_ d2esvd1 d1qznh\_ d1ogae1  
d1f4xh1 d4n1hb\_ d3ezjb1 d3mlw11 d1kfah1 d1etza1 d1b4jh1 d3cfic\_  
d4w68a\_ d2arja1 d1ek3a\_ d2ok011 d1vera\_ d1uwgh1 d1blnb1 d1fpth1  
d1rzga1 d2giya1 d4m3kb1 d1nc2a1 d2nyyd1 d1ncna\_ d1fbih1 d5dxwa\_  
d4fqqa1 d1dqdh1 d1jfq11 d1kelh1 d1faih1 d1frgl1 d1fig11 d4m6n11  
d1fo0a\_ d4hxb11 d3b5ga\_ d3quyd1 d2h9gb1 d1i8kb\_ d2dd8h1 d2ck0h1  
d1eaja\_ d4w6wb1 d2a6ib3 d1t66d1 d2e27h\_ d1ob1b1 d1f11b1 d2v7na1  
d1ad0a1 d2xt1b1 d1pskh1 d4i13b1 d2op411 d1a0q11 d1uwel1 d1za3a1  
d1ncb11 d4uu9a\_ d1bm3h1 d1cloh1 d1nqba2 d1cf8h1 d4y5va\_ d1mhph1  
d5anma1 d4cdgc1 d4ldeb\_ d1y01b1 d2pcpb1 d1z3g11 d1dfb11 d1fh5h1  
d3g5xa1 d1tzib1 d4dn311 d3zhka1 d2b1hh1 d2uyla1 d1f3dh1 d1nj9b1  
d2agjh1 d2h1pl1 d1q72h1 d8fabb1 d1ndmb1 d1rjca1 d4u6hb1 d3upca\_  
d2fbj11 d1osph1 d1tvda\_ d2cjh\_ d4fhbd1 d1bd2d1 d1rz7h1 d3nn8a\_  
d1blna1 d1knoa1 d1nfda1 d2bmkb1 d1dq11\_ d1igyb1 d1igf11 d12e8h1  
d3utza1 d1nc2b1 d1rihh1 d4mwfb1 d4jvpa1 d1mieh1 d1rhfa1 d1fgn11  
d1sbs11 d1lp9e1 d1dn0a1 d4lqf11 d1iaih1 d1kgcd1 d1mh5b1 d1gpol1  
d2g60h3 d1f8t11 d2jixd1 d4grwh\_ d1fo0b\_ d1bfob1 d1axsa1 d1u9ka\_  
d1nmbh\_ d1h8na1 d1h8na2 d1jguh1 d4eura1 d3sdy11 d35c8h1 d1w7211  
d1mvub\_ d1i9rh1 d1ob1a1 d4wenb\_ d1yeeh1 d3ietc1 d1f58h1 d1ad0b1  
d1mqk1\_ d1nbvh1 d4b50a\_ d3r8bb\_ d1baf11 d1mamh1 d4rgne1 d2gsgb\_  
d35c811 d1bafh1 d1ai1h1 d2pcpa1 d2fath1 d2x1pa\_ d1orsb1 d1libg11  
d1shma\_ d1a2yb\_ d1u0qa\_ d2coqa\_ d1hilb1 d1qfwi\_ d1jv5b\_ d1fn4b1  
d5e0qa\_ d1nsnh1 d1plg11 d4ocx11 d1kb5h1 d1rzhf1 d1pg7x1 d2fx7h1  
d2oi9c\_ d1l7i11 d3eyva1 d1d5i11 d4ffyl\_ d1tet11 d1a6wh\_ d1ac6a\_  
d3dvfa\_ d1nfde1 d1mimh1 d1ri8a1 d1jhlh\_ d3dura\_ d1fskb1 d1f97a1  
d3so3b1 d2ak4d1 d1lp9f1 d4z7wf1 d1l7th1 d4y5ya\_ d4x7ec1 d1emth1  
d1ikf11 d1nlbh1 d4utal1 d1bjma1 d1eapb1 d1u6ah1 d2dtgd1 d1kj2b\_  
d1xeda1 d1cleh1 d1fgvh\_ d2bnub1 d2fb4h1 d2dtgb1 d1ktrh\_ d1jp11  
d1qkz11 d4hepg\_ d2atpb1 d1flrh1 d2hrpl1 d1mvfa\_ d1iaim1 d3k80a1  
d2jb5h1 d3zkxc\_ d4grwe\_ d1it9h1 d1rhhb1 d3w9ec\_ d1e4wh1 d1sy6h1  
d2j6eh1 d3qxta\_ d1jglh1 d1p7ka1 d1tzhb1 d4n8pa1 d1gaf11 d2jelh1  
d1wioa2 d4i0cc1 d1cicb1 d1lmka2 d1lmka1 d1iqwh1 d1lorqb1 d1ejoh1  
d1jnlh1 d4zg1a\_ d43c9b\_ d1ggbl1 d1wejh1 d3q6fa1 d1f3dj1 d3c6la1  
d1bqlh1 d3p9wb\_ d1a3r11 d1h0db1 d2uzil\_ d1eo811 d1qfw1\_ d1n7m11  
d1igja1 d1c5ch1 d2a9mh\_ d1rmfh1 d1fj1b1 d4heme\_ d1ccza1 d1a5fh1  
d1ogad1 d1dlfh\_ d1qa9b\_ d1vge11 d3qskb\_ d1sjxa\_ d4ozfg1 d1sq2n\_  
d1qd0a\_ d1kcvh1 d1c5db1 d3qcul1 d8faba1 d3bn9d1 d1mjuh1 d4y8dc\_  
d7fabh1 d3dvgb1 d1lo011 d1a6tb1 d1gigh1 d1kcrh1 d2hwz11 d1yjdc1  
d3clf11 d4krna\_ d1d171\_ d1e6o11 d1mexh1 d3r0ma\_ d4kkna\_ d1fns11  
d1oaqh\_ d1rzia1 d1lucbh1 d1ncw11 d4b41a\_ d1nfd11 d2mpah1 d2d7t11



d4grwf\_ d4b5ea\_ d11k3h1 d3u79a\_ d4u3xa\_ d1ghfl1 d1bvkb\_ d1mcww1  
d1b88a\_ d1jrhh1 d32c2b1 d4wemb\_ d1dsfh\_ d1op3h1 d1cell1 d1iqda1  
d1qoka1 d1qoka2 d1qfuh1 d2crya1 d1ay1h1 d1oaql\_ d3ab0b\_ d1rur11  
d1t4kb1 d1bz7b1 d1n0xh1 d1for11 d1lucb11 d4w6yb\_ d43c9a\_ d2aab11  
d1tzia1 d4n1ca\_ d1k6qh1 d3g9ab\_ d4tvsa1 d1igmh\_ d1pz5b1 d3dx9a1  
d3wxwh\_ d1nakh1 d1kcul1 d3eaka\_ d4qlra1 d1cr911 d1d9ka\_ d1f4x11  
d1deea1 d2i27n2 d1c12a1 d2orb11 d1j8hd1 d1mcph1 d1c5da1 d1kenh1  
d1bd2e1 d1h5ba\_ d4x7fc1 d3upaa\_ d1t3fa1 d1indh1 d2dtgc1 d4hc111  
d1zv5a1 d4wgvb\_ d1uwgl1 d4f37k1 d1aqkh1 d1vesa\_ d3zkqd\_ d1fpt11  
d11o411 d1knob1 d3rrqa\_ d1ct8b1 d4orz\_ d1mlbb1 d4hgkc1 d1dqdl1  
d1bogb1 d4ozhe1 d1dr9a1 d1i7za1 d1dn0b1 d1kell1 d1rzi1 d1ypzf1  
d1wtla\_ d1hkfa\_ d1fail1 d1figh1 d2vyre\_ d1sjva\_ d1ohqa\_ d1bfoa1  
d1pkqb1 d1mjul1 d1b4j11 d1nsn11 d2arjb1 d1p4bh\_ d4aj0a\_ d3nn8b\_  
d2rcja1 d1f2xk\_ d4v1dd\_ d1adqh1 d2eksa\_ d4k3ga\_ d1jfqh1 d1uweh1  
d1frgh1 d4gftb\_ d1uz8b1 d4n1ea\_ d1bm311 d1clo11 d3mcka1 d2vq1a1  
d1ae6h1 d4aq1b1 d1uj3b1 d1nbqa1 d1fh511 d2ck011 d2ywza\_ d1q7211  
d4nxbx\_ d1hila1 d4hzb1 d2j8811 d1zmya1 d1cd0a\_ d1a4ka1 d1psk11  
d1a0qh1 d4krmb\_ d1ncbh1 d2fbjh1 d1j8he1 d1i3ua\_ d1cf811 d1fe8h1  
d2plya1 d1eeqa\_ d2x89a\_ d1o10a\_ d2r0lh1 d1ub5a1 d1dfbh1 d3eyvb1  
d4jdvb1 d4p2cg\_ d2gsia1 d2agj11 d1u3ha1 d2h1ph1 d1rih11 d1fskc1  
d1boga1 d2a7711 d1osp11 d1qfoa\_ d3dwta\_ d2fx711 d1rz711 d3stba1  
d1pkqa1 d1b6da1 d1dzba2 d1dzba1 d1kj2a\_ d411ha\_ d1rzgb1 d1dq1h\_  
d12e811 d1mie11 d1jmaa\_ d1sbs11 d1fgnh1 d1f5811 d1mqkh\_ d1ndgb1  
d3qeg11 d1ia11 d2aw2a1 d1tqbc1 d3fo2a1 d4dkaa\_ d1f8th1 d2g6011  
d2ywya\_ d1uj3a1 d1yc7a\_ d3bd3a\_ d4w6xb1 d1nmb1\_ d1i8ka\_ d1rjlb1  
d1ypze1 d1p7kb1 d1kxqe\_ d1gpoh1 d2z4qa1 d1w72h1 d1i9rl1 d4qgya1  
d4xt1c\_ d2qqnh1 d1cica1 d3c08h1 d2cd0a\_ d2bdnh1 d1hnga1 d1mam11  
d1nldh1 d1cr9h1 d4lcih1 d3bkyh1 d3qg711 d1ai111 d1kxvc\_ d4iosd\_  
d117ih1 d2x1qa\_ d1ub6b1 d3k74b\_ d1ibgh1 d1teth1 d1igya1 d1hxma1  
d2x6ma\_ d2e71a\_ d5e03a\_ d1qfwm\_ d2r0kh1 d1igjb1 d1rurh1 d1plgh1  
d1mj8h1 d1yuhb1 d3fmg11 d1rzf11 d1emt11 d1ad9b1 d1igtb1 d1nlb11  
d1d5ih1 d3k7ua\_ d4ffyh\_ d1bwwa\_ d3dvga1 d1a6ta1 d1fgvl\_ d4qxgl1  
d1mim11 d1jh11\_ d2hffb1 d2hh011 d1qkzh1 d117t11 d1afvh1 d1iaii1  
d2cjuh\_ d1um5h1 d2ghwb2 d2ghwb1 d1kgce1 d2fgwh1 d1ikfh1 d1dvfd\_  
d2i24n1 d2xtjb\_ d1za3b1 d2yc1a\_ d2hh0h1 d2x1oa\_ d1bvka\_ d1rjla1  
d5e7ba1 d1igta1 d1i11b1 d2fb411 d1mvua\_ d1jpt11 d32c2a1 d1fvca\_  
d1iqdb1 d2hrph1 d2p4ab\_ d4qo1a\_ d1p2cb1 d1wt5c\_ d1t4ka1 d5c1mb\_  
d1it911 d1bz7a1 d1b2wh1 d1e4w11 d1jnl11 d1yedb1 d1za6b1 d3u7aa\_  
d1igfh1 d3gnm11 d1orsa1 d1wejl1 d1a2ya\_ d1hxmb1 d1gafh1 d2j4wh1  
d1pz5a1 d1j05a\_ d1a3rh1 d4fq111 d1qfwh\_ d1eo8h1 d1n7mh1 d4s11a\_  
d1kegh1 d5da4a\_ d1iqw11 d3whxb1 d1vgeh1 d1deeb1 d1c12b1 d1t2q11  
d1ad9a1 d3gsnb1 d3b2uc1 d1ggbh1 d1t3fb1 d1nak11 d4ocmc\_ d1lila1  
d2v7hb3 d2esve1 d1mcoh1 d2qr0b1 d2q3aa\_ d1ct8a1 d1kcr11 d2pxyb\_  
d2uzih\_ d5c3ld\_ d3durb\_ d1c5c11 d2ak4e1 d1dl7h\_ d1xiwd\_ d1mlba1

d1rmfl1 d1i7zb1 d1dlfl\_ d2xa3a\_ d5bq7b1 d1dqqb1 d3h42l1 d1egjh1  
d1kcvl1 d1fe8l1 d2j6e11 d1f3rb2 d1lk3l1 d1sm3h1 d1q0xh1 d1ghfh1  
d7fabl1 d1igch1 d1l00h1 d4idla\_ d5c2b1\_ d1jrh11 d1l11a1 d3zhda1  
d4kfzc\_ d1b0wa\_ d1e6oh1 d1mexl1 d4krpb\_ d1fnsh1 d1ncwh1 d4hgma\_  
d4eigb1 d4rzca\_ d2mpa11 d4y5xa\_ d5en2b1 d3lrga1 d4ej1c1 d1rhha1  
d1j05b\_ d1forh1 d1q9wb1 d2wzpd\_ d2aq2a1 d1h0da1 d3revb1 d2ij0c1  
d1tzha1 d4m7j11 d1k6q11 d3b9kc1 d1igml\_ d3qeua1 d1dsfl\_ d1celh1  
d1kcu11 d1zvha1 d1zvoa1 d1tqbb1 d1ay111 d2qsc11 d2cgrh1 d1n10h1  
d1ken11 d3eo0a1 d4n9ob1 d1n0x11 d3k1kc\_ d1c4qa\_ d2wv6d\_ d1prtf\_  
d1l1trd\_ d4l63b1 d1r4pb\_ d1prtd\_ d1t10f\_ d2bosa\_ d1prtb1 d3chbd\_  
d2aq2b1 d1ck1a1 d1enf11 d1i4pa1 d1v1oa1 d1et9a1 d1esfa1 d2g9hd1  
d4ohja1 d1klud1 d1bxta1 d1eu3a1 d1ty0a1 d1fnua1 d2cqva1 d1fhga\_  
d2k1ma\_ d2dl2a1 d1biha3 d1biha1 d1biha4 d3qp3a1 d1g1ca\_ d1cvsc2  
d1cvsc1 d1xmwa2 d1m4ka2 d2otpa2 d1biha2 d1rhfa2 d2fcba2 d2fcba1  
d1wwbx\_ d1gsma2 d1epfa1 d1epfa2 d2dava1 d1waaa\_ d1f97a2 d1x44a1  
d1vcaa2 d1fnla2 d1fnla1 d3b5ha2 d3h8na2 d3h8na1 d1bjba1 d1bjba2  
d1pd6a\_ d1f2qa2 d1f2qa1 d3cx2a\_ d1nbqa2 d3b5ha1 d1n26a1 d1xiwb\_  
d1xaua\_ d1fltx\_ d2ifga1 d1olla1 d1olla2 d1cs6a4 d1cs6a3 d1cs6a2  
d1cs6a1 d2gw5a2 d1sy6a1 d1xiwa\_ d1lucta2 d1lucta1 d1ry7b2 d1gl4b\_  
d1qz1a3 d1olza1 d2c9aa1 d1wwca\_

**Family-22 (b.1.18.2)**

**Positive dataset contains 6 protein sequences.**

d2bema\_ d2fhfa2 d2fhfa1 d1cxl1a1 d2bhua1 d1txka1

**Negative dataset contains 4067 protein sequences.**

d1m32a\_ d1libja\_ d1iuga\_ d4q75a\_ d2bkwa1 d1t3ia\_ d1n8pa\_ d1qz9a\_  
d1jf9a\_ d1eg5a\_ d1p3wa\_ d3kgwa\_ d1c11a\_ d2ctza1 d1vjoa\_ d2rfva\_  
d1gc0a\_ d1cs1a\_ d1d2fa\_ d2ch1a1 d1qgna\_ d1pffa\_ d1elua\_ d2xlba\_  
d3m83a1 d4nmwa\_ d3i2ka1 d1lnsa3 d1mpxa2 d2cfba1 d1dfoa\_ d1o69a\_  
d1bj4a\_ d3k28a\_ d2bwpa\_ d3lg0a\_ d2fnua\_ d3ou5a\_ d1z7da1 d1b9ha\_  
d1iaya\_ d4msoa\_ d1bs0a\_ d1s0aa\_ d1sffa\_ d3tqxa\_ d1mdoa\_ d3qboa\_  
d3pgya\_ d1bjna\_ d2dkja\_ d1ejia\_ d1vefa1 d4wxga\_ d3bs8a\_ d3gbxa1  
d1w23a\_ d1u08a\_ d1lc5a\_ d1b5pa\_ d2ay1a\_ d1bw0a\_ d3pd6a\_ d7aata\_  
d2csta\_ d1j32a\_ d4wlha\_ d1o4sa\_ d1v2da\_ d1gdea\_ d1m6sa\_ d1v72a1  
d1svva\_ d1ajsa\_ d1wsta1 d2f8ja2 d1lk9a\_ d1vp4a1 d1xi9a1 d2gb3a1  
d1yaaa\_ d1r0ka3 d1j5pa3 d1vkoa2 d1vm6a2 d3qvsa2 d1gr0a2 d1p1ja2  
d1e57b\_ d1auyb\_ d1qnia1 d1libya\_ d1f56a\_ d1bypa\_ d1azca\_ d1ws8a\_  
d3u25a\_ d1cuoa\_ d1id2a\_ d1rkra\_ d2iaac\_ d4dp1x\_ d1nwpa\_ d2gima\_  
d2i7sa\_ d1qhqa\_ d3ehbb1 d1gyca3 d1hfua2 d1kbva1 d1kbva2 d1sdda1  
d1sdda2 d1gyca1 d1gyca2 d1mzya1 d2bw4a1 d1aoza1 d1aoza3 d1aoza2  
d1kyaa2 d1kyaa3 d1kyaa1 d1mzya2 d4e9sa1 d1sddb1 d1sddb2 d1hfua1  
d1hfua3 d1oe1a2 d1oe1a1 d1v10a2 d1v10a3 d1v10a1 d1rypd\_ d1irua\_  
d1rypc\_ d3unfk\_ d1rypa\_ d1j2pa\_ d1irui\_ d1j2qh\_ d3unfh\_ d1m4ya\_  
d1rypb\_ d1irul\_ d1irug\_ d1liru2\_ d1q5rh\_ d1rypg\_ d1g3ka\_ d1liruf\_  
d1q5qa\_ d1e94a\_ d1lirub\_ d1ryph\_ d3ty6a\_ d1liruj\_ d1liruk\_ d1rype\_

d1lirud\_ d1lirue\_ d3mi01\_ d1rypf\_ d1liruh\_ d2z3ba\_ d1liruc\_ d3mka2\_  
d1lirul\_ d4qgna\_ d1vr3a1 d1ladqa1 d1fnga1 d1uvqb1 d1zs8a1 d2vola1  
d2vola2 d1mfb12 d2jelh2 d1uwel2 d3qq4b1 d1kjob\_ d1k5na1 d1osph2  
d4odhl2 d1low0a1 d1low0a2 d1bfob2 d3l9ra2 d3jtth1 d2fath2 d4elkb2  
d1fn4b2 d2xfxb\_ d1pg7x2 d1cqka\_ d4k71b2 d1lk2a1 d1leap2 d4lfhg2  
d1i4fa1 d2nw2a2 d1kfah2 d1mhca1 d1h3ua1 d1wejh2 d1h0db2 d1a5fh2  
d1kcvh2 d1mjuh2 d1qqda1 d1kcrh2 d1k8ia1 d3huja2 d2nnab1 d1nfd2  
d3mffb2 d1s9va1 d1lk3h2 d1q0xl2 d1fv1b1 d1neza1 d4rfeb2 d1r3ha1  
d1a6tb2 d1kjva1 d1pz5b2 d1lonqa1 d2bc4a2 d1de4a1 d1k8da1 d1tcra2  
d1dn0b2 d1nfde2 d2xwtb2 d1bfoa2 d1mexh2 d1iakb1 d1ypzf2 d4f7ea2  
d1q72l2 d2fbjh2 d1fe8h2 d1clzh2 d1fngb1 d1uvqa1 d1vgka1 d1c16a1  
d4j12a2 d4x99b2 d1igtb3 d1je6a1 d1q72h2 d1nldh2 d1teth2 d2hmic2  
d1ilca2 d1ilca1 d1k8ib1 d1q0yh2 d1kfa12 d3frua1 d1pg7w2 d1u58a1  
d1lgyb4 d1lgyb3 d1hyrc1 d1klub1 d1deeb2 d1c12b2 d2bc4b2 d2ig2h2  
d1kcv12 d3wn5b1 d1lk2b\_ d1lk3l2 d1mju12 d1sm3h2 d1q0xh2 d1zvsa1  
d1ydpal d1u8ib2 d1ypze2 d1kcu2 d1zx5a1 d2phla2 d2phla1 d1fxza2  
d1fxza1 d1lrha\_ d1uija1 g1dgw.1 d2v09a\_ d1uika2 d1uika1 d1dgwa\_  
d1lep0a\_ d2pa7a1 d1wlta1 d1nxma\_ d2c0za1 d2b5ea2 d2b5ea3 d2b5ea1  
d2b5ea4 d2kp1a1 d2kp2a1 d1hyua3 d1hyua4 d1j08a2 d1mqta\_ d1d4m3\_  
d1fmd3\_ d2mev1\_ g1aym.1 d1ev13\_ d4q4w1\_ d1r1a3\_ d2x5ia\_ d1rhi1\_  
g1r1a.1 g1d4m.1 d1b35b\_ d1lopa\_ d1tme1\_ d4iv1a\_ g1pvc.1 g1fpn.1  
d1fpn1\_ d4gb31\_ d1d4m1\_ d1fmd1\_ d1ev11\_ d2wzr3\_ g1cov.1 d1qqp3\_  
g1fmd.1 d2x5ic\_ d1rhi3\_ g1oop.1 d1hxs1\_ g1hxs.1 d1fpn3\_ d1bev1\_  
g2mev.1 d1eah3\_ d1aym1\_ d1pvc3\_ d1qqp1\_ d1zba3\_ d1h8ta\_ d3vbhc\_  
g1b35.1 g1bev.1 d1hxs3\_ g1ev1.1 d1bev3\_ g1tmf.1 d1tmf1\_ d1b35a\_  
d2mev3\_ g1eah.1 g1h8t.1 d1eah1\_ d4q4w3\_ d1r1a1\_ d1aym3\_ d1pvc1\_  
d1zba1\_ d1h8tc\_ d1oopc\_ d1tme3\_ g1qqp.1 d4iv1c\_ g1tme.1 d1au7a2  
d1e3oc2 d2ovga\_ d1sq8a\_ d1rzsa\_ d3kz3a\_ d3orca\_ d3gpdg2 d2q49a2  
d1hdgo2 d2g17a2 d2cvoa2 d2czca1 d3pwka2 d1obfo2 d1i32a2 d1zyao2  
d2pkqo2 d1b7go2 d2hjsa2 d1cf2o2 d1vkna2 d1nvm2 d2m9wa1 d3dfxa\_  
d2msya\_ d2djoa1 d2r5za\_ d1f43a\_ d2lmda1 d1akhb\_ d1s7ea1 d3nara\_  
d1zq3p1 d2craa1 d1mija\_ d4uuta\_ d3a01a\_ d1x58a1 d3rkqa1 d3cmya1  
d2cqxa1 d2da6a1 d1e3oc1 d1fjla\_ d1mh3a1 d1ig7a\_ d1x41a1 d1wh7a1  
d1gt0c1 d2mw8a\_ d1lfup\_ d1x2ma1 d1b72a\_ d1wi3a1 d1jgga\_ d1wjha1  
d1x2na1 d1mnm\_ d2cuea1 d3k2aa\_ d2hosa\_ d2jwta2 d1pufa\_ d1oact1  
d2hi3a\_ d1b8ia\_ d4j19a\_ d3lnqa\_ d1wh5a1 d1b8ib\_ d1hcra\_ d1tc3c\_  
d1gda1 d1u78a2 d1xg1a1 d1itya\_ d1hlva2 d1iufa2 d1iufa1 d2iu5a1  
d1zk8a1 d2g7sa1 d2fd5a1 d2np5a1 d1z0xa1 d2id6a1 d2d6ya1 d2i10a1  
d1vi0a1 d2oi8a1 d3c07a1 d2ns7a1 d2fq4a1 d2yvea1 d1t33a1 d2o7ta1  
d1rcta1 d2np3b1 d2g7ga1 d2gena1 d2fbqa1 d2g7la1 d2gfna1 d2g3ba1  
d2jj7a1 d2hyja1 d1sgma1 d1ui5a1 d2hkua1 d2id3a1 d4jyka1 d3lv8a\_  
d1s3ga1 d1zaka1 d1s4qa\_ d3tvta2 d1uf9a\_ d1khta\_ d1ckea\_ d1losna\_  
d1p5zb\_ d4tmka\_ d3cm0a\_ d1jaga\_ d3h86a\_ d1t0hb\_ d1nn5a\_ d2h92a\_  
d3kb2a1 d2c95a1 d1yj5a2 d1kgda\_ d1ly1a\_ d2ak3a1 d1vyva2 d1deka\_

d2grja1 d1p3ja1 d1y63a\_ d1e4ya1 d1s96a\_ d3iija1 d1lvga\_ d1nksa\_  
d1vyua2 d4e22a\_ d1qf9a\_ d1jjva\_ d1q3ta\_ d1ki9a\_ d1lw7a2 d1teva\_  
d1kja2 d1gsia\_ d2iyva2 d1kaga\_ d1viaa\_ d1e6ca\_ d1x6va3 d1g3ma\_  
d1j99a\_ d1t8ta1 d1nsta\_ d1zrha\_ d1ls6a\_ d2a3ra\_ d1aqua\_ d2zptx\_  
d3ckla\_ d1texas\_ d1q44a\_ d2gwaha\_ d1odfa\_ d1uj2a\_ d4gi7a\_ d2jeoa1  
d1rz3a\_ d1z0ja1 d3umra2 d3gj0a1 d2gaoa1 d1yzga1 d1x3sa1 d1g7sa4  
d1puja\_ d1udxa2 d1kk1a3 d2o52a\_ d1jwyb\_ d1zcaa2 d1zcba2 d2fv8a1  
d2cjwa\_ d3dz8a1 d1xzpa2 d1vg8a\_ d4qxaa\_ d2ew1a1 d1x1ra1 d2bcgy\_  
d3doea1 d3cona\_ d3rega\_ d3wyga\_ d1upta\_ d2b6ha1 d1zd9a1 d1lnza2  
d1r5ba3 d1n0ua2 d1r2qa\_ d2f91a1 d2rhda\_ d3q3jb\_ d3q85a\_ d1efma1  
d1r8qa\_ d2gf9a1 d2akab1 d1ek0a\_ d1z08a1 d2gcoa1 d2dy1a2 d4g01b\_  
d2cxa1 d1svia\_ d3q72a\_ d1ni3a1 d4ac9a4 d2erxa1 d2bmea\_ d1wxqa1  
d2gf0a1 d4ldja1 d1zunb3 d1d5ca\_ d4lv5b\_ d1efca3 d1kmqa\_ d2g6ba1  
d3lrpa\_ d1tada2 d2y8ea\_ d4rd4a1 d1z06a1 d2heia\_ d3a58b\_ d1u01a2  
d1d2ea3 d1zj6a1 d2ocba\_ d3rwoa\_ d1mr3f\_ d2e9sa1 d4u5xa1 d2iwra\_  
d2fn4a1 d3bwdd\_ d2nzja1 d2atva1 d2ksqa\_ d3l43a\_ d1mkya2 d1mkya1  
d1wmsa\_ d1jnja3 d2rmka\_ d1f6ba\_ d1f60a3 d1gota2 d1jala1 d2fh5b1  
d1g16a\_ d2wblc\_ d1m7ba\_ d1wf3a1 d1t9ha2 d1z6xa1 d1z0aa1 d2fg5a1  
d2a5ja1 d2bcjq2 d1s0ua3 d1ky3a\_ d4y0va\_ d4lhwa\_ d2qmea1 d2atxa1  
d1legaa1 d1ryha\_ d1moza\_ d1nrjb\_ d2erya1 d3bfka\_ d1puia\_ d1fzqa\_  
d3j3az1 d3t5ga\_ d1shza2 d3defa\_ d2f7sa1 d3raba\_ d3tsoa\_ d3aq4a\_  
d2a17a1 d3sfva1 d3bc1a\_ d2ncda\_ d1sdma\_ d3h4sa1 d2heha\_ d2grya\_  
g3kin.1 d1br2a2 d1goja\_ d1f9va\_ d2mysa2 d1lkxa\_ d3t0qa\_ d4db1a1  
d3gbja\_ d1ry6a\_ d1v8ka\_ d1kv9a1 d1k8ka2 d1k8ka1 d3uleb1 d3i33a2  
d3i33a1 d1bupa1 d1dkgd2 d4ci6a2 d1jcf1a1 d4a2ba2 d2fxua1 d1yaga2  
d1yaga1 d4cbua2 d1bupa2 d3vrda1 d3vrda2 d1fcdc2 d1h1oa2 d1h1oa1  
d1m70a2 d1m70a1 d1ig8a1 d1czan2 d1czan3 d1czan1 d1ig8a2 d1czan4  
d1bg3a4 d1bg3a2 d1bg3a1 d1nira1 d1qksa1 d2d0oa3 d2d0oa2 d1nbwa2  
d1hroa\_ d4gedb\_ d3zooa\_ d1mz4a\_ d1gu2a\_ d1f1fa\_ d1dvva\_ d1c6ra\_  
d1c75a\_ d1e29a\_ d1gdva\_ d1cnoa\_ d1h32b\_ d1co6a\_ d2bh4x\_ d2aiua\_  
d5cytr\_ d1jdl1a\_ d1i8oa\_ d2zboa\_ d3dmia\_ d1ls9a\_ d1wvec\_ d2yk3a\_  
d3ph2b\_ d1dw0a\_ d5aura\_ d1ql3a\_ d1qn2a\_ d1f1ca\_ d4zzva\_ d2xspa\_  
d1leg1a\_ d4v20a\_ d1ojja\_ d4ipma1 d1gpia\_ d4csia\_ d3pfza\_ d3ovwa\_  
d2yoka\_ d2nqya\_ d1h4ga\_ d1oa2a\_ d1olra\_ d3b7ma\_ d4h7ma1 d3wp3a\_  
d2vgda\_ d1ligoa\_ d3zsea\_ d2nlra\_ d3wx5a\_ d1oa3a\_ d1pvxa\_ d1m4wa\_  
d1f5ja\_ d1oa4a\_ d1ks5a\_ d4ix1a1 d3sita1 d1g66a\_ d5ajha1 d1evsa\_  
d1cnt1\_ d1pvhb\_ d1z7ca\_ d1huwa\_ d1bgea\_ d1rhga\_ d1f6fa\_ d1f45b\_  
d1axia\_ d1letea\_ d3tgxb\_ d1scfa\_ d2z3qa1 d3qb1a\_ d1hula\_ d1m48a\_  
d4nkqb\_ d1eera\_ d1v7mv\_ d5e4ea\_ d2o27a\_ d3b5ka\_ d2psma1 d4zf7a\_  
d3uf5a\_ d4x51a\_ d1d9ca\_ d4ypgc1 d3oq3a\_ d1lqsl\_ d1n1fa\_ d1aula\_  
d1wu3i\_ d3bes1\_ d3ux9a\_ d3rbaa\_ d2qtra\_ d1nupa\_ d3l92a\_ d1f9aa\_  
d1qjca\_ d2h29a\_ d1vlha\_ d1od6a\_ d1lw7a1 d1mrza2 d4ruka\_ d2el7a\_  
d1iq0a2 d1r6ta2 d1ivsa4 d2cyba\_ d1rqga2 d1j09a2 d2yxna\_ d1f7ua2  
d1h3fa1 d1ffya3 d2g36a1 d1nzja\_ d1jila\_ d1n3la\_ d1i6la\_ d1pfva2

d1h3na3 d3n9ia\_ d3sz3a1 d3sw2a\_ d1moxc\_ d1dx5i3 d1edmb\_ d1autl2  
d1autl1 d1nqlb\_ d1dval1 d1szba2 d1kigl\_ d2y5fl\_ d1ijqa2 d1gk5a\_  
d1g1sa2 d1nt0a3 d1xdtr\_ d1lmja2 d1lmja1 d1nzia2 d2wphe\_ d1klil\_  
d1pfxl2 d1pfxl1 d1p9ja\_ d1g1ta2 d1f7ea\_ d4yzub\_ d1lr7a1 d2mgpa1  
d1b9wa1 d1b9wa2 d2mgpa2 d1ob1c2 d1n1ia2 d1n1ia1 d2npra2 d2npra1  
d2h1ia1 d2r8ba1 d3b5ea1 d3cn9a\_ d1auoa\_ d2y5ia\_ d1psra\_ d3n22a\_  
d2egda\_ d4ggfc\_ d2wcea\_ d2luca\_ d4aqia\_ d3nsia\_ d2lp3a\_ d1j55a\_  
d1a4pa\_ d1k8ua\_ d1nsha\_ d3fs7a\_ d2pvba\_ d1ttxa\_ d1rwy\_ d2kyfa\_  
d1rk9a\_ d1a75a\_ d1exra\_ d1tiza1 d1nyaa\_ d1g8ia\_ d1ggwa\_ d1wdcc\_  
d3fwba\_ d1ggza\_ d2o5ga\_ d1ctaa\_ d1m45a\_ d3i5gc\_ d1sl8a\_ d1fpwa\_  
d2scpa\_ d2roaa\_ d4aqra\_ d3pn7b\_ d1br1b\_ d2mysb\_ d1s6ca\_ d1bjfa\_  
d2obha\_ d1jfka\_ d1qv0a\_ d1lkja\_ d2mlfc\_ d2m97a\_ d2d8na\_ d4by5a\_  
d1jbaa\_ d4nqga\_ d1wdcb\_ d2mysc\_ d1j7qa\_ d1s6ia\_ d1uhka2 d1r2ua\_  
d1dtla\_ d3kf9a\_ d3pn7c\_ d1fi6a\_ d1c07a\_ d1gjya\_ d1y1xa\_ d1hqva\_  
d1dvia\_ d1df0a1 d4usla\_ d1k94a\_ d1jfxa\_ d1wkya2 d1uuqa\_ d3wh9a\_  
d4mlra\_ d1xyza\_ d4xuya\_ d2je8a5 d4bf7a1 d3cuia\_ d1ur4a\_ d1qw9a2  
d1odza\_ d2vzsa5 d1bqca\_ d2x2ya1 d1hjqa\_ d1qnra\_ d4y7ea1 d1vjza\_  
d4k68a\_ d2v3ga\_ d4hpga\_ d1nofa2 d1nq6a\_ d1h4pa\_ d1aq0a\_ d3ziza\_  
d4bs0a\_ d1ecea\_ d1h1na\_ d1ta3b\_ d1w91a2 d1ilwa\_ d1uhva2 d1us3a2  
d1legza\_ d7a3ha\_ d1tvna1 d3nyda1 d1ghsa\_ d2cyga1 d4xv0a\_ d2c8na2  
d1w32a\_ d3emca\_ d1v6ya1 d1foba\_ d2uwfa1 d2fgla\_ d3niya1 d2c0ha1  
d1rh9a1 d1yq2a5 d1szna2 d1fa2a\_ d1pama4 d5do8a1 d1ea9c3 d1hx0a2  
d2fhfa5 d1qhoa4 d1avaa2 d1m53a2 d4m8ua1 d2gjpa2 d1lwha2 d4howa1  
d1ktba2 d1j0ha3 d3vm5a1 d2x1ia\_ d1wzaa2 d1uasa2 d2diea1 d1mxga2  
d1ht6a2 d1eswa\_ d1iv8a2 d5cpsa\_ d1ud2a2 d1zjaa1 d3gbea1 d1kwga2  
d1wdpa\_ d1gcy2 d1g5aa2 d1hvxa2 d3dhpa2 d2bhua3 d4do4a1 d3qgva1  
d1e43a2 d1g94a2 d2d3na2 d1gjwa2 d1gvia3 d1x1na1 d1r7aa2 d1tz7a1  
d4c7ga2 d2gjxa1 d1nowa1 d1yhta1 d4toqa\_ d1wb0a1 d1w9pa1 d1eoka\_  
d1itxa1 d1kfwa1 d1goia2 d1edqa2 d2gsja\_ d1hjxa1 d1vf8a1 d3wdpp1  
d3wq5a\_ d1gnxa\_ d4gxpa\_ d4hz8a\_ d1e4mm\_ d3aiua\_ d1wcga1 d1qvba\_  
d3ahxa\_ d1v02a\_ d2dgaa\_ d1pbga\_ d1vffa1 d1qoxa\_ d4ha4a\_ d1mixa2  
d1e5wa2 d1j19a2 d1isna2 d2a16b2 d1offa\_ d1frra\_ d3wcqa\_ d1e9ma\_  
d1l5pa\_ d1wria\_ d1i7ha\_ d3av8a\_ d1czpa\_ d1rfka\_ d3p1ma1 d3b2ga\_  
d2bt6a2 d1wgqa1 d1v89a1 d2coda1 d1zc3b\_ d1wg7a1 d1u5ea1 d1v61a1  
d2coca1 d2ys1a1 d1v5pa1 d1ntya2 d1wjma1 d1wila1 d1u29a\_ d1xx0a1  
d1unqa\_ d2zkmx3 d1fhoa\_ d1v88a1 d2adza1 d1x1fa1 d1p6sa\_ d2coaa1  
d1btka\_ d1v5ma1 d1faoa\_ d2x18a\_ d1dyna\_ d1x1ga1 d4kaxb\_ d2j59m1  
d1ki1b2 d1xcga2 d1txda2 d1u5da1 d1dbha2 d1w1ha\_ d1upqa\_ d1v5ua1  
d1foea2 d2fjla1 d1eaza\_ d2dfka2 d2cofa1 d1kz7a2 d9ldta1 d2ewda3  
d1up7a1 d2dfda1 d1s6ya1 d1vjta1 d7mdha1 d1hyea1 d1t2da1 d1ojsa3  
d1b8pa1 d1ldna1 d1hyha1 d1civa1 d2a92a1 d1ez4a1 d1i0za1 d1y6ja1  
d1gv0a1 d1ur5a1 d1llda1 d1obba1 d1v8ba1 d1gdha1 d1l7da1 d2dlda1  
d1mx3a1 d1ygya1 d1qp8a1 d1li4a1 d1j4aa1 d2naca1 d1npya1 d3t4ea2  
d1a4ia1 d1o0sa1 d2hk9a2 d2egga2 d1b26a1 d1bvua1 d1gg2a1 d1c1da1

d1leha1 d1gtma1 d1nvtal d3dona2 d1ledza1 d1gpja2 d1vi2a1 d1p77a1  
d1nyta1 d1b0aa1 d1vl6a1 d1v9la1 d1txga2 d3f47a1 d1mv8a2 d2pv7a2  
d1xc2a3 d2ahra2 d4xiya1 d2f1ka2 d1pgja2 d1i36a2 d1np3a2 d1lj8a4  
d1teaa3 d1qmga2 d2i76a2 d2g5ca2 d1wdka3 d1dlja2 d3cuma3 d1kola2  
d1f8fa2 d1qora2 d1jqba2 d1vj0a2 d1cdoa2 d1gu7a2 d1d1ta2 d1xa0a2  
d2dm6a2 d1jvba2 d1rjwa2 d1llua2 d1h2ba2 d1tt7a2 d1piwa2 d1o89a2  
d1liz0a2 d1e3ja2 d1yb5a2 d1uufa2 d1e3ia2 d3gpdg1 d1vc2a1 d2nvwa1  
d1u8fo1 d1ydwa1 d1hdgo1 d2g17a1 d1cf2o1 d2czca2 d1r0ka2 d1obfo1  
d2cvoa1 d1ebfa1 d1h6da1 d1zh8a1 d2q49a1 d1qkia1 d1j5pa4 d3pzra1  
d1xeaa1 d1vkoa1 d1vm6a3 d3qvsa1 d2pkqo1 d1b7go1 d1gr0a1 d1p1ja1  
d1lc0a1 d1j0xo1 d3pwka1 d2hjsa1 d1zyao1 d1vkna1 d1tlta1 d1nvmb1  
d3sjua\_ d3ojfa1 d1xu9a1 d2jjya1 d1n7ha\_ d1y1pa1 d1h5qa\_ d1jtva\_  
d4fs3a\_ d2bkaa1 d1gy8a\_ d2c5aa1 d1ulsa\_ d1ooea\_ d2b69a1 d1y5ma1  
d1spxa\_ d1aela\_ d1bxka\_ d1ydea1 d1gega\_ d1hdoa\_ d1o5ia\_ d1e6ua\_  
d1snya1 d2rhca\_ d3zv4a\_ d5ceja\_ d2d1ya1 d1fjha\_ d3w8ea\_ d2fmua1  
d1x1ta\_ d1rpna\_ d3ay7a1 d1k2wa\_ d1eq2a\_ d2hrba1 d3ruaa\_ d2ew8a1  
d4hwka\_ d1xgka\_ d2bd0a1 d1yo6a1 d2a35a1 d2ntva\_ d1vl8a\_ d1hdca\_  
d4bkua\_ d2ag5a1 d2q45a\_ d1nffa\_ d4iy1a\_ d1zbqa1 d1kewa\_ d1ek6a\_  
d1ja9a\_ d2q46a2 d1iy8a\_ d1cyda\_ d2ptga\_ d1hxha\_ d1uzma1 d3lyla\_  
d4m89a\_ d3weya\_ d2b1la1 d1w6ua\_ d1sb8a\_ d2q2va\_ d4nr0a\_ d1e6wa\_  
d2gasa\_ d3oiga1 d2bgka1 d1mxha\_ d1vl0a1 d1rkxa\_ d1r6da\_ d1wmaa1  
d1e7wa\_ d2c07a1 d1xkqa\_ d3tzha\_ d1g0oa\_ d3lz6a\_ d1qyca\_ d1ledoa\_  
d1gz6a\_ d1oc2a\_ d1t2aa\_ d1zema1 d2xoxa\_ d1z45a2 d1geea\_ d1p33a\_  
d3lt0a\_ d4e6pa\_ d2wyua\_ d1db3a\_ d4q9na\_ d1xhla\_ d4o1ma\_ d1fmca\_  
d2uvda\_ d2gdza1 d2z1ma\_ d2o23a2 d2fr1a2 d2fr1a1 d1qsga\_ d1qyda\_  
d4zjua\_ d2a4ka1 d1yb1a\_ d1wvga1 d1yxma1 d3f4ba\_ d1mg5a\_ d1xg5a1  
d1r55a1 d3gboa\_ d1atla\_ d1kufa\_ d4q1la\_ d1quaa\_ d1ypla\_ d1wnia\_  
d3nqyb\_ d4gera\_ d4c5pa\_ d2bsza1 d4bgfa\_ d1w4ta1 d3ioqa\_ d1fh0a\_  
d1o0ea\_ d1khqa\_ d1m6da\_ d2cb5a\_ d1cs8a\_ g8pch.1 d1s4va\_ d2pnsa\_  
d1vsna1 d1mira\_ d1iwda\_ d2oula\_ d7pcka\_ d3bwka\_ d3bcna\_ d2p86a\_  
d1pvja\_ d1pcia\_ d1gece\_ d1deua\_ d4bs6a\_ d1xkga1 d1cqda\_ d1jqpa2  
d2c0ya\_ d2bdza\_ d3p5ua\_ d2o36a\_ d1k9xa\_ d1zoya1 d1qo8a2 d1d4ca2  
d1chua2 d1jnra2 d2jk6a2 d2jk6a1 d1feca1 d1feca2 d1lpfa1 d1lpfa2  
d1xhca1 d1xhca2 d1dxla2 d1dxla1 d1gera2 d1m6ia2 d1onfa1 d1onfa2  
d3lada2 d3lada1 d1w4xa1 d1w4xa2 d1gesa2 d1mo9a1 d1xdia1 d1fl2a2  
d1fl2a1 d1fcda1 d1fcda2 d1h6va2 d1h6va1 d1mo9a2 d1gv4a2 d1gv4a1  
d2gv8a2 d2gv8a1 d1aoga2 d1hyua1 d1ebda1 d1ebda2 d3dk9a1 d1q1ra2  
d1q1ra1 d1gesa1 d1zbfal d2z1ha\_ d2etja1 d3qioa1 d1j1la\_ d2e4la\_  
d2lsna1 d1lio2a\_ d1uaxa\_ d2yv0x\_ d1mu2a1 d1lekea\_ d1i39a\_ d1ps9a2  
d1o94a2 d1cjca1 d1pn0a1 d1reoa1 d1ju2a1 d2f5va1 d3c96a1 d2gmha1  
d1pj5a2 d1gpea1 d1o5wa1 d1n4wa1 d2dw4a2 d2ivda1 d1seza1 d2voua1  
d1kdga1 d3ljqa\_ g1k2x.1 d2v76a\_ d1wj1a1 d1qqga2 d1qqga1 d1ntva\_  
d1n3ha\_ d4dbba\_ d3f0wa1 d1p3ra\_ d1wgua1 d2cy4a1 d3hqca\_ d1wvha1  
d1xr0b1 d1v58a1 d1t3ba1 d4ilfa2 d4npba2 d2av4a1 d3nvva1 d1krha3

d2h88b1 d1n62a2 d1t3qa2 d1kf6b2 d1zoyb1 d1ffva2 d1dgja2 d1rm6c2  
d1faaa\_ d1wika1 d1xfla\_ d1ttza1 d2f51a1 d1ti3a\_ d1nhoa\_ d1sena\_  
d2i4aa\_ d1ep7a\_ d1zmaa1 d1fo5a\_ d3lefa1 d3diea1 d2yana1 d1z6na1  
d1oaza\_ d3zywa1 d4aj8a\_ d1nm3a1 d4fiwa\_ d1wmja\_ d4hs1a1 d1iloa\_  
d1xwaa1 d1wjka1 d2vm1a\_ d1fb6a\_ d1gh2a\_ d1h75a\_ d1nw2a\_ d1kx5b\_  
d3a6na\_ d4m6ba2 d2nqbd\_ d3wkjd\_ d2yfwe\_ d4h9na\_ d5bnxa\_ d1kx5c\_  
d3r45a\_ d1eqzb\_ d4jjnb\_ d1f66c\_ d1eqza\_ d4wnnb\_ d1kx5a\_ d1u35c1  
d1lid3a\_ d2nqbc\_ d1kx5d\_ d1tafa\_ d1bh9b\_ d1tafb\_ d1q9ca\_ d1h3ob\_  
d2byka1 d1n1ja\_ d4g92b\_ d1bh9a\_ d1jfia\_ d1h3oa\_ d2bykb1 d1n1jb\_  
d1pd212 d1nhya2 d2a2ra2 d1k0dd2 d1f2ea2 d1gsua2 d1f3ba2 d2fhea2  
d2pvqa1 d1tw9a2 d1oyja2 d1e6ba2 d1k0ma2 d3ik7a1 d4is0a1 d1r5aa2  
d1jlva2 d1m0ua2 d3gtub2 d1z9ha2 d1okta2 d1axda2 d2gsra2 d1tu7a2  
d1k3ya2 d1zagma1 d1b48a2 d1gnwa2 d1gwca2 d2gsta2 d1glqa2 d1oe8a2  
d1pn9a2 d1v2aa2 d1fw1a2 d1iqca2 d1iqca1 d1eb7a1 d1nmla2 d1nmla1  
d1qusa\_ d1qqya\_ d1f6ra\_ d1ivma\_ d2gv0a\_ d1iiza\_ d2z2fa\_ d1j8xa\_  
d1ghla\_ d1b9oa\_ d1741a\_ d1691a\_ d2o4wa\_ d1p37a\_ d1k28a3 d1xjta1  
d1jtma\_ d2f2qa\_ d4e97a1 d3w3ea\_ d4tx7a\_ d3cqla\_ d4msta\_ d3iwra\_  
d1dxja\_ d2z37a\_ d4dyga\_ d2pjsa1 d1k1la\_ d2i7ra1 d1ecea\_ d1xqaa1  
d5cj3a1 d1jifa\_ d2p7oa\_ d1r9ca\_ d1nkia\_ d1mpya2 d1kw3b2 d1kw3b1  
d4ghga1 d1tfza1 d3isqa1 d3isqa2 d1sqia1 d1sqia2 d1lkda2 d1lkda1  
d1mpya1 d1cjxa2 d1sp9b2 d1t47a1 d1t47a2 d1flua2 d1sp8a1 d1sp8a2  
d1flua1 d1s5ja2 d1qhta2 d4dlea2 d1tgoa2 d3py8a2 d1q8ia2 d1kfsa2  
d2py5a2 d1d5aa2 d1qsta\_ d2beia1 d4m3sa\_ d1u6ma1 d1ygha\_ d1yk3a1  
d3dr6a\_ d1xmta\_ d1z4ea1 d2ge3a1 d1bo4a\_ d2fiaa1 d2jdca1 d1y9wa1  
d3to7a\_ d1lwza1 d2fl4a1 d2ozua1 d2b5ga\_ d2cy2a1 d2p0wa\_ d1cm0a\_  
d4pswa\_ d1yrea1 d1yr0a1 d1m4ia\_ d2gana1 d1yvka1 d1ghea\_ d2g3aa1  
d1y7ra1 d2euia1 d1q2ya\_ d2fsra1 d1xeba\_ d2ae6a1 d1cjwa\_ d1qsma\_  
d2aj6a1 d1y9ka1 d1i12a\_ d1vkca\_ d2atra1 d1n71a\_ d2d4pa1 d2fiwa1  
d2fe7a1 d1tiqa1 d2ou2a\_ d1yx0a1 d2fcka1 d1p0ha\_ d2j8ma\_ d2pq8a\_  
d1z4ra1 d1s3za1 d1c4qa\_ d1prtcl d2wv6d\_ d1prtfl\_ d4l63b1 d1r4pb\_  
d1prtd\_ d1tl0f\_ d2bosa\_ d1prtb1 d3chbd\_ d1xvqa1 d1pn0a2 d3hy2a\_  
d2cvba1 d1o8xa\_ d1lu4a\_ d1we0a1 d2bmxal d2a4va1 d1psqa\_ d1xiya1  
d1q98a\_ d1n8ja\_ d1zofa1 d2ggta\_ d3tjja\_ d4je1a1 d1o73a\_ d3s9fa\_  
d2zcta\_ d1qmva\_ d1jfua\_ d2b1ka\_ d5dvba1 d2b5xa1 d2v2ga\_ d3tb2a\_  
d4llra\_ d4fh8a1 d1e2ya\_ d1knga\_ d2h30a\_ d1i5ga\_ d2z9sa\_ d2f8aa1  
d1tp9a1 d2b7ka\_ d1nm3a2 d3hvva\_ d2wfca1 d4kcea\_ d1xvwa1 d4gqca1  
d3qpma\_ d4k1fa\_ d1zzoa1 d1gp1a\_ d1prxa\_ d2qked\_ d4ksoa\_ d1t4za1  
d1wwja\_ d4mh8a\_ d4i7ga1 d1w52x1 d2ppla1 d1hpla2 d1lpbb2 d2oxea1  
d1bu8a2 d1rpla2 d1ysl1x\_ d4hs9a\_ d1ispa\_ d1ex9a\_ d1ku0a\_ d3qmma\_  
d3rp2a\_ glucy.1 d1fuja\_ d2zchp\_ d3w94a\_ d1si5h\_ d1lo6a\_ g2pka.1  
d1cgha\_ d1kigh\_ d1a5ia\_ d3s9ba\_ d1hj8a\_ d1ao5a\_ d2anya\_ d1q3xa1  
d1gvza\_ d1azza\_ d4gsoa\_ d2f91a1 d1iaua\_ d1gdna\_ d1eufa\_ glfiw.1  
d1eq9a\_ d4nfea\_ d2rdla\_ d1spja\_ d1elva1 d1a7sa\_ d1ekbb\_ d1pfxc\_  
d1yc0a\_ d2aiqa\_ glfiz.1 d1fi8a\_ d4k60a\_ d4dgja\_ d1mzaa\_ d1lop0a\_

d3tjva\_ d1pytd\_ d1sgfg\_ glgg6.1 d2eeka\_ glrtf.1 d1a0ja\_ d3g01a\_  
d1pytc\_ d4e7na\_ d1ddja\_ d1z8ga1 d2hlca\_ d1npma\_ d1brup\_ gljou.1  
d1sgfa\_ d1autc\_ g2hnt.1 g1kdq.1 d1orfa\_ d3s69a\_ d4crga\_ d1fxya\_  
d1bqya\_ d1lgya\_ d4l3wa\_ d1llfa\_ d1gz7a\_ d1lukca\_ d3groa\_ d1thta\_  
d1ei9a\_ d1ra6a\_ d1muka\_ d3gsza\_ d1khva\_ d1te9a\_ d2xwha\_ d3uqsa\_  
d3hkwa\_ d3n6ma\_ d2cjqa\_ d2xyma\_ d1teba\_ d1te8a\_ d1s48a\_ d1u09a1  
d4wfxa\_ d3tyqa\_ d2pgga1 d3zxha\_ d1cgl\_a\_ d1rm8a\_ d1leaka2 d1hy7a\_  
d2jsda\_ d1hv5a\_ d1i76a\_ d1dzka\_ d4tlja\_ d2a2ua\_ d4wfv\_a\_ d3t1da\_  
d4iaxa\_ d3zq3a\_ d2nnda\_ d1i4ua\_ d1kxoa\_ d1bbpa\_ d1kt7a\_ d1lexsa\_  
d3s26a1 d1lf7a\_ d1qfta\_ d4gh7a\_ d1z24a1 d1qabe\_ d1xkia\_ d1lew3a\_  
d3bx7a\_ d4iawa1 d1n0sa\_ d1gkab\_ d3kzaa\_ d2k23a\_ d2l9ca1 d2joza1  
d1gm6a\_ d3kffa\_ d3saoa1 d1e5pa\_ d1yupa1 d1iiua\_ d2tbvc\_ d1c8nc\_  
d1x36a\_ d1smvc\_ d1ng0c\_ d4sbvc\_ d1f2nc\_ d1cixa\_ d1y29a\_ d1v7fa\_  
d2jtba\_ d1d1ha\_ d1g9pa\_ d1llupa\_ d1qk7a\_ d1mb6a\_ d2a2va\_ d1niya\_  
d1i25a\_ d1hvwa\_ d2mpqa\_ d1ie6a\_ d1kqha\_ d1la4a\_ d2mxoa1 d1dl0a\_  
d1koza\_ d1qk6a\_ d1emxa\_ d1lqra\_ d1c6wa\_ d1rmka\_ d1ixta\_ d1eyoa\_  
d1cnaa\_ d1fu3a\_ d1g1pa\_ d1f3ka\_ d1fyga\_ d4lu0a\_ d1of8a\_ d3unda1  
d3e9aa1 d1vr6a2 d1n8fa\_ d2qkfa\_ d1d9ea\_ d1o60a\_ d1e88a1 d1l6ja5  
d1l6ja4 d1eaka4 d1eaka3 d1l6ja3 d1h8pa1 d1ny721 d1ny722 d1a6ca2  
d1a6ca1 d1pgl22 d1pgl21 d1pgl11 d1ny711 d1jgta2 d1ofda3 d1ea0a3  
d1ecfa2 d1q15a2 d1ct9a2 d1te5a\_ d1y14b1 d2nn6i1 d1i94l\_ d2zjra2  
d1sma\_ d2qamc2 d1hh2p1 d2r7da1 d1rl2a2 d1wfqa1 d3bzka4 d1x6oa2  
d3a0ja\_ d2j01d2 d2ja9a1 d4q15a\_ d1hr0w\_ d1luza\_ d2n3sa\_ d2vnud1  
d1h95a\_ d1go3e1 d2nn6h1 d1ne3a\_ d2mola\_ d1iz6a2 d1jjga\_ d1e3pa2  
d2ix0a3 d2ix0a2 d2lxja\_ d1ueba3 d1ueba2 d2z0sa1 d1u01a1 d2ix0a1  
d2eifa2 d2je6i1 d3i2za1 d2c35b1 d2ahob2 d1t9ha1 d3i4oa\_ d2qall1  
d1jt8a\_ d2nn6g1 d1g6pa\_ d3cama\_ d1i94q\_ d1d7qa\_ d2ba0a1 d2vnud2  
d2vnud3 d1khia2 d2qalq1 d1wi5a1 d1xtda2 d1ny4a\_ d4w9ta\_ d1jvna1  
d4x2ra1 d1ka9f\_ d1qo2a\_ d4axka1 d1h5ya\_ d4u28a\_ d2y88a\_ d4wd0a\_  
d1vzwa1 d1eixa\_ d3exra\_ d2ffca1 d2fdsa1 d3n3ma1 d2czda\_ d1q6oa\_  
d2yyua\_ d1vqta1 d1dbta\_ d3ldva1 d4lt9a1 d3tc7a1 d3hoja\_ d1i4na\_  
d3vnda\_ d3n18a1 d1geqa\_ d3naval d4a2ra1 d3tc6a1 d1ujpa\_ d4ijba\_  
d1xcfa\_ d1vc4a\_ d1rd5a\_ d1qopa\_ d3b5va\_ d2r80b\_ d1cqa1 d1cg5a\_  
d1gcvb\_ d3boma\_ d2h8fb\_ d2raoa\_ d3bj1a\_ d4hrrb\_ d2r50a\_ d3d1kb\_  
d2aalb1 d3zhwa\_ d3hf4b\_ d3gdja\_ d1jebb\_ d3bj1b\_ d1x9fb\_ d1wmub\_  
d1gcva\_ d3bcqb\_ d3d4xb\_ d2dc3a\_ d3hf4a\_ d4yu3a\_ d3k8ba\_ d1qpwb\_  
d2r80a\_ d3bcqa\_ d1v4wa\_ d3wtgb\_ d1j17a\_ d4esaa\_ d1a9we\_ d3d1lab\_  
d1fsla\_ d4h21a\_ d1v4wb\_ d1mwca\_ d1vhba\_ d1jeba\_ d1spgb\_ d1h97a\_  
d1q1fa\_ d1tu9a1 d3d1aa\_ d1hdsb\_ d3hyub\_ d2zfb\_ d3fs4a\_ d1oj6a\_  
d1shrb\_ d4h21b\_ d4yu3b\_ d1spga\_ d3hrwa\_ d3qqra\_ d3at5a\_ d4wchd\_  
d3hyua\_ d1cg5b\_ d1uc3a\_ d1hbra\_ d2raob\_ d1outb\_ d4esab\_ d3gdjb\_  
d3qqqa\_ d1x9fc\_ d3vrfa\_ d1itha\_ d3mkba\_ d3d4xa\_ d3mjpa\_ d1jl6a\_  
d3fh9a\_ d1outa\_ d2dc3b\_ d1it2a\_ d3eoka\_ d3g46a\_ d1qpwa\_ d3vrfb\_  
d1ch4a\_ d1x9fd\_ d1hdsa\_ d2zfba\_ d3mkbb\_ d1or4a\_ d3wtga\_ d1a4fa\_



d3fh9b\_ d3bomb\_ d3cy5a\_ d3at5b\_ d1x9fa\_ d2oifa\_ d4lmbx\_ d1cpcb\_  
d3v57a\_ d1kn1a\_ d1cpca\_ d4f0ta\_ d2vjha\_ d4po5b\_ d1eyxa\_ dl1alla\_  
d4f0tb\_ d1b33b\_ d1b8db\_ d4h0mb\_ d1b33a\_ d2vjhb\_ d4l6mb\_ d2vmlb\_  
dl1allb\_ d2vjta\_ d3dbja\_ d2vmla\_ d2vjtb\_ d4f0ub\_ dl1f99b\_ d4rmpa1  
dl1liaa\_ d1eyxb\_ d2uulb\_ d4lmsb\_ d4f0ua\_ d2bv8a\_ dl1f99a\_ d2bv8b\_  
d2c7lb\_ d3dbjb\_ d4rmpb1 d1b8da\_ d4h0ma\_ d3v57b\_ d1kn1b\_ dl1liab\_  
d2uula\_ d2j96a\_ dl1azwa\_ dl1mtza\_ d2xqfa\_ dl1ea5a\_ dl1f6wa\_ dl1dx4a\_  
dl1qe3a\_ dl1k4ya\_ d4qwwa\_ d2ha2a\_ dl1r88a\_ dl1sfra\_ dl1f0na\_ d4qeka\_  
d2qvba\_ d2v9za\_ d4kafa1 d4iuua3 d4bvva\_ d5hpga\_ d3k65a\_ dl1ki0a3  
dl1ki0a2 dl1ki0a1 dl1a0ha1 dl1pmla\_ d3sp8a3 d2feba1 dl1xova2 dl1f74a\_  
d3l21a\_ d2e1da\_ dl1to3a1 dl1w3ia\_ dl1sfla\_ dl1n7ka\_ dl1vcva1 d4imea\_  
dl1wa3a\_ d2ocza1 dl1f2ja\_ d3m16a\_ d2yxga\_ dl1ub3a\_ d3a5fa\_ dl1fbaa\_  
dl1l6wa\_ dl1xfba1 dl1wx0a1 dl1vpxa1 dl1ojxa\_ dl1mxsa\_ d2a4aa1 dl1xkya1  
d3cq0a1 d3s1xa\_ dl1f05a\_ dl1fdja\_ d3cp1a1 d4d2ja\_ dl1cg2a1 dl1yloa2  
dl1y7ea2 dl1y0ya3 dl1lfwa1 dl1vixa1 dl1fnoa4 dl1vh0a2 dl1ysja1 dl1vhea2  
dl1z2la1 d2fvga2 dl1r3na1 d2grea2 dl1xmba1 gl1q7l.1 dl1rtqa\_ d2ftba\_  
dl1pmpa\_ d2rcqa1 dl1fdqa\_ d4l1kpa\_ dl1sa8a\_ dl1vyfa\_ dl1lpja\_ d3vg7a1  
d4azqa1 dl1o8va\_ d5bvqa\_ dl1p6pa\_ d2qo4a\_ dl1opba\_ dl1yiva1 dl1o1va\_  
d4bvma1 d4tkba\_ d4i3ba\_ dl1bwya\_ dl1ftpa\_ dl1ggla\_ d4gkca\_ dl1cbia\_  
d3p6da1 dl1kqwa\_ d2a0aa1 dl1m4la\_ d2bk7a\_ d3fjua\_ dl1z5ra1 dl1kwma1  
dl1uwya2 d2c1ca1 dl1dtda\_ dl1h8la2 d3lgia\_ d3i77a\_ d2z9ia2 d4nsva\_  
dl1lcya2 d4jcn\_ dl1agja\_ dl1os8a\_ dl1hpga\_ dl1l1ja\_ dl1qtfa\_ dl1e69a\_  
dl1mv5a\_ d3g60a4 gl1ii8.1 dl1ewqa2 dl1ji0a\_ dl1v43a3 d2wmfa1 dl1vpla\_  
dl1g2912 d4a82a2 gl1f2t.1 d2d62a1 d3tuic1 d2bbsa1 d3g60a3 d2ixea\_  
dl1g6ha\_ dl1sgwa1 d2qi9c\_ d3rlfa1 d3b60a1 d3d31a2 d2pzea1 gl1xew.1  
dl1jj7a\_ dl1oxxx2 d2onka1 dl1wlwa\_ dl1iwea\_ dl1qf5a\_ dl1vmaa2 dl1nija1  
dl1np6a\_ d2p67a1 d3ihla\_ dl1okkd2 dl1lsla2 dl1slma2 dl1iona\_ d2v40a\_  
dl1dj3a\_ d3hida\_ d2vo1a1 d2g0ta1 dl1vcoa2 dl1j8mf2 dl1g3qa\_ dl1xjca\_  
dl1p9ba\_ dl1qzxa3 dl1ihua2 dl1ihua1 d2qm8a\_ dl1dj2a\_ d4ioja\_ dl1cp2a\_  
dl1yrba2 d3gqba2 dl1skye3 dl1xp8a1 dl1tf7a2 dl1tf7a1 dl1ye8a1 dl1skyb3  
d2qe7d2 d4blta\_ d4huta\_ d3l1daa2 d4hyya\_ d2i3ba1 dl1cr1a\_ d3j9tb2  
d3ntua2 dl1vdza1 d2z43a\_ dl1e9ra\_ dl1nlfa\_ d3ziaa2 dl1n0wa\_ dl1g6oa\_  
d3ziad2 d3j9ta2 dl1pzna2 d3gqbb2 d2i49a\_ dl1nnfa\_ dl1xvxa\_ dl1ursa\_  
dl1h3da1 dl1iuda\_ d4mlva1 dl1twya\_ d3e13x\_ d2nxoa1 d4pfua\_ d3ttma\_  
dl1elja\_ d2qmwa1 dl1us5a\_ dl1y3na1 dl1jeta\_ dl1uqwa\_ d4f19a1 d2esna2  
d3thia\_ d3fasa1 d2uyeb\_ d2xwva1 dl1r9la\_ d2fyia1 d2ozza1 dl1sw5a\_  
dl1nh8a1 dl1vr5a1 d2g29a\_ dl1xs5a\_ d3lswa\_ d2z23a\_ d3w9va\_ d3tcha\_  
dl1q35a\_ dl1z7me1 d3q27a\_ dl1p99a\_ dl1ve4a1 d2i6ea1 d4mcoa1 d4n8ya\_  
dl1eu8a\_ dl1zbma1 dl1hsla\_ dl1ixca2 dl1jl1na\_ dl1xvya\_ dl1y9ua\_ d2z22a1  
dl1xoca1 d4oera\_ dl1wdna\_ d5f1qa1 dl1xt8a1 dl1i6aa\_ d4gwoa\_ d4igta1  
dl1pc3a\_ d4mmpa1 dl1o63a\_ d2czla1 d2onsa2 d4mija1 d4ok5a1 d2bmfa1  
d2bmfa2 dl1yksa1 dl1yksa2 dl1jr6a\_ d2qeqa1 d2j1qa1 dl1a1va2 dl1eh3a\_  
d3skpa\_ dl1dtza2 dl1ieja\_ dl1jnfa2 dl1ce2a1 dl1jnfa1 dl1b1xa2 dl1b1xa1  
dl1jw1a1 dl1jw1a2 dl1ryoa\_ dl1h76a1 dl1h76a2 dl1c4oa1 d2p6ra3 d2p6ra4

dloywa2 dloywa3 dlwrba1 dlw36b2 dlw36b1 dlc4oa2 d3bora\_ dlt6na\_  
d2eyqa5 d2eyqa3 d2eyqa2 d2zu6a2 dlveca\_ dlw36d1 d2g9na1 dlz3ix2  
d2rb4a\_ dlhv8a1 dlhv8a2 d1t5ia\_ dlw36c2 d2j0sa2 d2j0sa1 d1fuka\_  
d3hjha1 dlz5za1 dlqdea\_ dlz63a1 d1s2ma2 d1s2ma1 dlwp9a1 dlwp9a2  
dlgm5a3 dlgm5a4 d3dina4 d3dina3 dlq0ua\_ dlw36c1 dlz3ix1 dlnkta3  
dlnkta4 dluaaa2 dlw36d2 glqhh.1 d2fwra2 d2fwra1 d3q3ma\_ dlza0a1  
dlmxra\_ d2inca\_ dljk0a\_ d2incb\_ dlmhyb\_ d3hf1b\_ dlmtyb\_ d2uw1a\_  
dlmhyd\_ d3n37a\_ dlafra\_ dloquc\_ d1syya\_ dlmtyd\_ d2o1za\_ dluzra\_  
dlmsa\_ d2fkza\_ dlzujal d1s3qa1 d2fjca1 dlz6om1 dlveia\_ d4dyya\_  
dljiga\_ d3gvya\_ d2pyba\_ d4cy9a1 d3bvfa1 d1r03a\_ d2cf7a\_ dlnf4a\_  
dlzs3a1 d4iwka\_ d3ka8a\_ d3np0x\_ d1n1qa\_ d1lb3a\_ d4e6ka\_ dlz6oa1  
d2fzfa1 d4dyua\_ d3ge4a\_ dljgca\_ d4am4a\_ d2z6ma\_ dlji5a\_ dlvlga\_  
dl1koa1 dlkrqa\_ d3qz3a\_ d1o9ra\_ d2ffxj\_ d1yv1a1 d2v2pa\_ dlj30a\_  
d4di0a\_ dl dpsa\_ d1oewa\_ d2qzxa\_ d2asia\_ dlpsoe\_ dlmiqa\_ d1smra\_  
d2h6ta\_ dlpfza\_ dlizda\_ d3hd8a\_ dlj71a\_ dl dpja\_ d4aa9a\_ d1t6ex\_  
g1b5f.1 g1lya.1 dlqdma2 dlboxa\_ dlwkra\_ d1tzsa\_ dlibqa\_ d2qzwa\_  
dlbdqa\_ d3ggta\_ d3ixoa\_ dlmrxa\_ d2haha\_ d1tw7a\_ d4njsa\_ d1sgua\_  
d2p3da\_ dl nsoa\_ d3d3ta\_ d2rkfa\_ dl c6ya\_ d2rspa\_ d3ogpa\_ d3ekwa\_  
d2o4na\_ d2j9ja\_ dlbaia\_ d3ggua\_ d3lzua\_ d4npua\_ d4j55a\_ d2r8na\_  
d2fxda\_ d2p3ca\_ d4dqa\_ d3ttpa\_ d3t3ca\_ d2p3aa\_ d2hc0a\_ d2fdda\_  
d3mwsa\_ d3rcha\_ d3k40a\_ dl pmma\_ d4yl8a1 d2al6a3 dlwgda1 dlwggal  
d4q5eb\_ dlwjna1 dlse9a\_ d3n3kb\_ dlwz0a1 dlwe6a1 d2m0xa\_ d2gbka\_  
d3rt3b1 dlwh3a1 d1sifa\_ d2ekec2 d4ii2b1 d4hk2a1 dl c3ta\_ d1m94a\_  
dlwgha1 dl ttna1 dlj8ca\_ dlwx8a1 d3v6cb1 d2ma9b\_ d4i61b1 dlbt0a\_  
d2jvca1 dl iyfa\_ d2k1fa\_ dlwxva1 dlwf9a1 d2io0b2 dl x1ma1 d2gbma\_  
dlzw7a1 d2m17a\_ dlud7a\_ dlwe7a1 d2lwp\_ d2gbja\_ dlwjua1 dl v6ea1  
dlv86a1 d4eewa\_ dlwiaa1 d4icva\_ d4gu2a\_ dlwx7a1 dlwy8a1 d4hjka1  
d2fazal dl v5oa1 d3ruib\_ d1eo6a\_ d3waob\_ d2r2qa1 d3m95a\_ d3wana\_  
d2al3a1 d2cr5a1 dlwj4a1 d1s3sg\_ d3ubra\_ dlqo8a1 dl d4ca1 d2k3va\_  
dlft5a\_ dlqdba\_ dlm1qa\_ d2j7aa\_ dlh21a\_ dl ogyb\_ d4fasa\_ dljnia\_  
dl oaha\_ dl sp3a\_ d3h33a\_ dlrwja\_ dl9hca\_ dl os6a\_ d3bxua\_ d3h4na\_  
dli77a\_ d3caoa\_ dlj0pa\_ d2ctha\_ dl duwa\_ dl ofwa\_ d2e84a\_ dlhh5a\_  
dlgyoa\_ d3h34a\_ dl iyka2 dl iyka1 dlrxta1 dl iica2 dl dszb\_ dl a6ya\_  
d3cbba\_ dl ynwa1 dl r4ia\_ dlhcqa\_ d2hana\_ d2hanb\_ d2enva1 dl kb4b\_  
d2n11b\_ dl lo1a\_ dlum8a\_ dl ixza\_ dlqvra2 dlqvra3 dlqzma\_ dl sxjc2  
dljr3d2 d2p65a\_ dl18qa2 dl g8pa\_ d3hu3a3 dl sxjd2 dl in4a2 dl sxja2  
dl tuea1 d2ce7a2 dlw5sa2 dl sxjb2 dl d2na\_ dl ny5a2 dl ofha\_ d2gnoa2  
d2a5yb3 dl fnna2 dl u0ja1 dl lv7a\_ dl iqpa2 d2fnaa2 dl ixsb2 d4gita\_  
dl sxje2 dl g41a\_ dl svpa\_ dl mbma\_ d3su6a1 dl cula1 d4agka\_ dl vcpa\_  
dlq31a\_ g1n11.1 d3e90b\_ d3u1jb\_ d2lj7a\_ dl n4na\_ d2m8bb1 d2kyqa\_  
d3psma\_ dljkza\_ dljxca\_ d2gl1a\_ dlugla\_ d4uj0a\_ d2k4ua\_ dlhp2a\_  
d2lu9a\_ dlbaha\_ d2meoa1 dlwm7a\_ dlhlya\_ dl n8ma\_ dljlza\_ dlwpda\_  
dlc55a\_ dl pvza\_ dlwt7a\_ dlrjia\_ dlwz5a\_ dl m2sa\_ dl pjva\_ dl c49a\_  
dlqkya\_ d2ktca1 dlwmta\_ dl du9a\_ dlj5ja\_ dlrlga\_ dl t0za\_ d2i61a\_

d1t1ta\_ d1sn4a\_ d1kv0a\_ d21kba\_ d1npia\_ d1wwna\_ d1pe4a\_ d2kbka\_  
d2li7a\_ d1djta\_ d2kbha\_ d1dq7a\_ d1sega\_ d1omya\_ d1zywa1 d1jzaa\_  
d2jcqa\_ d1n9wa1 d1bbua1 d1e1oa1 d1b8aa1 d1l0wa1 d3a74a1 d1eova1  
d1t61c1 d1iyjb4 d1iyjb5 d1iyjb3 d1o7ia\_ d4ipca1 d1x3ea\_ d4apva\_  
d1jb7a1 d1jb7a2 d1jb7a3 d3kdfa\_ d1ue1b\_ d1wjja1 d3eiva\_ d1xjva2  
d1xjva1 d2ccza2 d1se8a\_ d1l1oc\_ d1jb7b\_ d1qvca\_ d1qzga\_ d1miua4  
d1miua5 d1miua3 d3g48a1 d1gd7a\_ d1mkha\_ d1jjcb3 d3ubub\_ d1legia\_  
d1qo3c\_ d1v7pa\_ d1tdqb\_ d3ubua\_ d1c3ab\_ d1h8ua\_ d3bx4b\_ d1t8ca1  
d1sb2a1 d1qdda\_ d2ziba1 d3cada\_ d1byfa\_ d1j34b\_ d1jwia\_ d1jzna\_  
d1c3aa\_ d1oz7b\_ d1wmza\_ d3bdwb\_ d1hq8a\_ d1fifa1 d1dv8a\_ d3hupa\_  
d1wk1a1 d1umra\_ d2afpa\_ d3bx4a\_ d1gz2a\_ d1sl6a\_ d1v7pb\_ d3g8ka\_  
d1ixxa\_ d1j34a\_ d1jwib\_ d1g1sa1 d1y17a1 d1ja3a\_ d1fvub\_ d3bdwa\_  
d1sb2b1 d1fvua\_ d1umrc\_ d1oz7a\_ d4m17a\_ d3cfwa1 d1ypqa1 d1g1ta1  
d3fd4a\_ d3l9jc\_ d4dn8a1 d1v41b\_ d1rdl1\_ d2msba\_ d1prtb2 d1rpma\_  
d2shpa1 d1yfoa\_ d1l8ka\_ d2ooqa1 d1g4us2 d1p15a\_ d1lara2 d1lara1  
d1wcha\_ d2fh7a2 d2fh7a1 d1ohea2 d2f4da\_ d1rxda\_ d2hxpa\_ d1xria\_  
d1d5ra2 d1fpza\_ d3ezza\_ d4y2ea\_ d1i9sa\_ d3azya\_ d3wvja\_ d1upsa1  
d1ajoa\_ d2hyka\_ d1ajka\_ d2vy0a\_ d1o4ya\_ d3o5sa\_ d3d6ea\_ d3atga\_  
d1dypa\_ d1umza\_ d3i4ia\_ d1c1la\_ d41bqa\_ d1a78a\_ d1slta\_ d4no4a\_  
d3zsja\_ d3duia\_ d1g86a\_ d1is3a\_ d1qmja\_ d1hlca\_ g1qmo.1 g1len.1  
d3zyra\_ d1fnya\_ d1n47a\_ g2ltn.1 d1avba\_ d3usua\_ d1dhkb\_ d1f9ka\_  
d1ukga\_ d1g8wa\_ d1g9fa\_ d1wbfa\_ d3wcsa\_ d1g7ya\_ g1loe.1 d1mvqa\_  
d1hq1a\_ d1v6ia\_ d1dbna\_ d1qnwa\_ d1fx5a\_ d4l8qa\_ d1ioaa\_ d3n35a\_  
d1epwa1 d2h0ba\_ d2erfa\_ d1h30a2 d3mw4a1 d1pz7a\_ d2r1ba\_ d3v64a1  
d1d2sa\_ d3bopa1 d3mw3a1 d1okqa1 d1okqa2 d1wioa4 d1ccza2 d1vcaa1  
d1dr9a2 d2d9qb1 d2nxyb2 d2dara2 d2dara1 d1wyha2 d2dloa2 d1rutx4  
d1rutx3 d2cuqa2 d1x4la2 d1x4la1 d1x3ha2 d1x3ha1 d2d8za1 d1x61a2  
d1x6aa1 d1x6aa2 d2cora2 d2cora1 d1v6ga1 d1v6ga2 d2d8za2 d1x64a1  
d1x64a2 d1b8ta1 d2co8a1 d1x63a2 d2dj7a2 d2dj7a1 d2cu8a2 d2cu8a1  
d1g47a2 d1g47a1 d1j2oa1 d1wyha1 d2dloa1 d1wiga1 d1wiga2 d2cupa2  
d2cupa3 d1x68a1 d2d8ya2 d2d8ya1 d1m3va2 d1x62a1 d1x68a2 d1x61a1  
d1b8ta3 d1b8ta2 d2d8xa2 d2d8xa1 d1x4ka1 d1x4ka2 d2cuqa1 d1m3va1  
d2co8a2 d1j2oa2 d1x63a1 d2cura1 d2cura2 d1x62a2 d1op9a\_ d1y01a1  
d1letzb1 d1egj11 d2gsib1 d1nj9a1 d4jfh1 d1aqk11 d1t2ja\_ d1lo4h1  
d1zvya1 d3v4v11 d4enec1 d1kxtb\_ d5e8ea1 d2pxya\_ d4weud\_ d1xiwc\_  
d2esvd1 d1qnzh\_ d1logae1 d1f4xh1 d4n1hb\_ d3ezjb1 d3mlw11 d1kfah1  
d1letza1 d1b4jh1 d3cfic\_ d4w68a\_ d2arja1 d1ek3a\_ d2ok011 d1vera\_  
d1uwgh1 d1blnb1 d1fpth1 d1rzga1 d2giya1 d4m3kb1 d1nc2a1 d2nyyd1  
d1ncna\_ d1fbih1 d5dxwa\_ d4fqqa1 d1dqdh1 d1jfq11 d1kelh1 d1faih1  
d1frg11 d1fig11 d4m6n11 d1fo0a\_ d4hxb11 d3b5ga\_ d3quyd1 d2h9gb1  
d1i8kb\_ d2dd8h1 d2ck0h1 d1eaja\_ d4w6wb1 d2a6ib3 d1t66d1 d2e27h\_  
d1ob1b1 d1f11b1 d2v7na1 d1ad0a1 d2xt1b1 d1pskh1 d4i13b1 d2op411  
d1a0q11 d1uwe11 d1za3a1 d1ncb11 d4uu9a\_ d1bm3h1 d1cloh1 d1nqba2  
d1cf8h1 d4y5va\_ d1mhph1 d5anma1 d4cdgc1 d4ldeb\_ d1y01b1 d2pcpb1

d1z3g1l d1dfb1l d1fh5h1 d3g5xa1 d1tzib1 d4dn3l1 d3zhka1 d2b1hh1  
d2uy1a1 d1f3dh1 d1nj9b1 d2agjh1 d2h1pl1 d1q72h1 d8fabb1 d1ndmb1  
d1rjca1 d4u6hb1 d3upca\_ d2fbj1l d1osph1 d1tvda\_ d2cjev\_ d4fhbd1  
d1bd2d1 d1rz7h1 d3nn8a\_ d1blna1 d1knoa1 d1nfda1 d2bmkb1 d1dq1l\_  
d1igyb1 d1igfl1 d12e8h1 d3utza1 d1nc2b1 d1rihh1 d4mwfb1 d4jvpa1  
d1mieh1 d1rhfa1 d1fgn1l d1sbsh1 d1lp9e1 d1dn0a1 d4lqfl1 d1iaih1  
d1kgcd1 d1mh5b1 d1gpol1 d2g60h3 d1f8tl1 d2jixd1 d4grwh\_ d1fo0b\_  
d1bfob1 d1axsa1 d1u9ka\_ d1nmbh\_ d1h8na1 d1h8na2 d1jguh1 d4eura1  
d3sdy1l d35c8h1 d1w72l1 d1mvub\_ d1i9rh1 d1ob1a1 d4wenb\_ d1yeeh1  
d3ietc1 d1f58h1 d1ad0b1 d1mqk1\_ d1nbvh1 d4b50a\_ d3r8bb\_ d1baf1l  
d1mamh1 d4rgne1 d2gsgb\_ d35c8l1 d1bafh1 d1ai1h1 d2pcpa1 d2fath1  
d2x1pa\_ d1orsb1 d1ibgl1 d1shma\_ d1a2yb\_ d1u0qa\_ d2coqa\_ d1hilb1  
d1qfwi\_ d1jv5b\_ d1fn4b1 d5e0qa\_ d1nsnh1 d1plgl1 d4ocxl1 d1kb5h1  
d1rzfh1 d1pg7x1 d2fx7h1 d2oi9c\_ d1l7il1 d3eyva1 d1d5il1 d4ffyl\_  
d1tet1l d1a6wh\_ d1ac6a\_ d3dvfa\_ d1nfde1 d1mimh1 d1ri8a1 d1jhlh\_  
d3dura\_ d1fskb1 d1f97a1 d3so3b1 d2ak4d1 d1lp9f1 d4z7wf1 d1l7th1  
d4y5ya\_ d4x7ec1 d1emth1 d1likfl1 d1nlbh1 d4uta1l d1bjma1 d1eapb1  
d1u6ah1 d2dtgd1 d1kj2b\_ d1xeda1 d1cleh1 d1fgvh\_ d2bnub1 d2fb4h1  
d2dtgb1 d1ktrh\_ d1jpth1 d1qkz1l d4hepg\_ d2atpb1 d1flrh1 d2hrpl1  
d1mvfa\_ d1iaim1 d3k80a1 d2jb5h1 d3zkxc\_ d4grwe\_ d1it9h1 d1rhhb1  
d3w9ec\_ d1e4wh1 d1sy6h1 d2j6eh1 d3qxta\_ d1jglh1 d1p7ka1 d1tzhb1  
d4n8pa1 d1gaf1l d2jelh1 d1wioa2 d4i0cc1 d1cicb1 d1lmka2 d1lmka1  
d1iqwh1 d1orqb1 d1ejoh1 d1jnlh1 d4zgl1a\_ d43c9b\_ d1ggbl1 d1wejh1  
d3q6fa1 d1f3dj1 d3c6la1 d1bqlh1 d3p9wb\_ d1a3r1l1 d1h0db1 d2uzil\_  
d1eo8l1 d1qfwl\_ d1n7ml1 d1igja1 d1c5ch1 d2a9mh\_ d1rmfh1 d1fj1b1  
d4heme\_ d1ccza1 d1a5fh1 d1ogad1 d1dlfh\_ d1qa9b\_ d1vgel1 d3qskb\_  
d1sjxa\_ d4ozfg1 d1sq2n\_ d1qd0a\_ d1kcvh1 d1c5db1 d3qcul1 d3bn9d1  
d1mjuh1 d4y8dc\_ d7fabh1 d3dvgb1 d1l00l1 d1a6tb1 d1gigh1 d1kcrh1  
d2hwz1l d1yjdc1 d3clfl1 d4krna\_ d1d17l\_ d1e6ol1 d1mexh1 d3r0ma\_  
d4kkna\_ d1fns1l d1oaqh\_ d1rzia1 d1lucbh1 d1ncwl1 d4b41a\_ d1nfdfl  
d2mpah1 d2d7tl1 d4grwf\_ d4b5ea\_ d1lk3h1 d3u79a\_ d4u3xa\_ d1ghfl1  
d1bvkb\_ d1mcww1 d1b88a\_ d1jrhh1 d32c2b1 d4wemb\_ d1dsfh\_ d1lop3h1  
d1ce1l1 d1iqda1 d1qoka1 d1qoka2 d1qfuh1 d2crya1 d1ay1h1 d1oaql\_  
d3ab0b\_ d1rur1l d1t4kb1 d1bz7b1 d1n0xh1 d1for1l d1lucbl1 d4w6yb\_  
d43c9a\_ d2aab1l d1tzia1 d4n1ca\_ d1k6qh1 d3g9ab\_ d4tvsa1 d1igmh\_  
d1pz5b1 d3dx9a1 d3wxwh\_ d1nakh1 d1kcul1 d3eaka\_ d4qlra1 d1cr9l1  
d1d9ka\_ d1f4xl1 d1deea1 d2i27n2 d1c12a1 d2orb1l d1j8hd1 d1mcph1  
d1c5da1 d1kenh1 d1bd2e1 d1h5ba\_ d4x7fc1 d3upaa\_ d1t3fa1 d1indh1  
d2dtgc1 d4hc1l1 d1zv5a1 d4wgvb\_ d1uwgl1 d4f37k1 d1aqkh1 d1vesa\_  
d3zkqd\_ d1fpt1l d1l04l1 d1knob1 d3rrqa\_ d1ct8b1 d4orzc\_ d1mlbb1  
d4hgkc1 d1dqdl1 d1bogb1 d4ozhe1 d1dr9a1 d1i7za1 d1dn0b1 d1kell1  
d1rzib1 d1ypzf1 d1wtla\_ d1hkfa\_ d1fail1 d1figh1 d2vyre\_ d1sjva\_  
d1ohqa\_ d1bfoa1 d1pkqb1 d1mjul1 d1b4jl1 d1nsnl1 d2arjb1 d1p4bh\_  
d4aj0a\_ d3nn8b\_ d2rcja1 d1f2xk\_ d4v1dd\_ d1adqh1 d2eksa\_ d4k3ga\_

d1jfqh1 d1uweh1 d1frgh1 d4gftb\_ dluz8b1 d4nlea\_ d1bm3l1 d1clol1  
d3mcka1 d2vq1a1 d1ae6h1 d4aq1b1 d1uj3b1 d1nbqa1 d1fh5l1 d2ck0l1  
d2ywwa\_ d1q72l1 d4nbxb\_ d1hila1 d4hzb1 d2j88l1 d1zmya1 d1cd0a\_  
d1a4ka1 d1psk1 d1a0qh1 d4krmb\_ d1ncbh1 d2fbjh1 d1j8he1 d1i3ua\_  
d1cf8l1 d1fe8h1 d2p1ya1 d1eeqa\_ d2x89a\_ d1ol0a\_ d2r0lh1 d1ub5a1  
d1dfbh1 d3eyvb1 d4jdvb1 d4p2cg\_ d2gsia1 d2agj1 d1u3ha1 d2h1ph1  
d1rihl1 d1fskc1 d1boga1 d2a77l1 d1ospl1 d1qfoa\_ d3dwta\_ d2fx7l1  
d1rz7l1 d3stba1 d1pkqa1 d1b6da1 d1dzba2 d1dzba1 d1kj2a\_ d4l1ha\_  
d1rzgb1 d1dq1h\_ d12e8l1 d1miel1 d1jmaa\_ d1sbs1 d1fgnh1 d1f58l1  
d1mqkh\_ d1ndgb1 d3qeg1 d1iail1 d2aw2a1 d1tqbc1 d3fo2a1 d4dkaa\_  
d1f8th1 d2g60l1 d2ywwa\_ d1uj3a1 d1yc7a\_ d3bd3a\_ d4w6xb1 d1nmb1\_  
d1i8ka\_ d1rjlb1 d1ypze1 d1p7kb1 d1kxqe\_ d1gpoh1 d2z4qa1 d1w72h1  
d1i9rl1 d4qgya1 d4xt1c\_ d2qqnh1 d1cica1 d3c08h1 d2cd0a\_ d2bdnh1  
d1hnga1 d1mam1 d1nldh1 d1cr9h1 d4lcih1 d3bkyh1 d3qg7l1 d1ai1l1  
d1kxvc\_ d4iosd\_ d117ih1 d2x1qa\_ d1ub6b1 d3k74b\_ d1ibgh1 d1teth1  
d1igy1 d1hxma1 d2x6ma\_ d2e71a\_ d5e03a\_ d1qfwm\_ d2r0kh1 d1igjb1  
d1rurh1 d1plgh1 d1mj8h1 d1yuhb1 d3fmg1 d1rzfl1 d1emt1 d1ad9b1  
d1igtb1 d1nlb1 d1d5ih1 d3k7ua\_ d4ffyh\_ d1bwwa\_ d3dvga1 d1a6ta1  
d1fgv1\_ d4qxxg1 d1mim1 d1jh1l\_ d2hffb1 d2hh0l1 d1qkzh1 d1l7t1l  
d1afvh1 d1iaii1 d2cjuh\_ d1um5h1 d2ghwb2 d2ghwb1 d1kgce1 d2fgwh1  
d1ikfh1 d1dvfd\_ d2i24n1 d2xtjb\_ d1za3b1 d2yc1a\_ d2hh0h1 d2x1oa\_  
d1bvka\_ d1rjla1 d5e7ba1 d1igta1 d1il1b1 d2fb4l1 d1mvua\_ d1jpt1l  
d32c2a1 d1fvca\_ d1iqdb1 d2hrph1 d2p4ab\_ d4qo1a\_ d1p2cb1 d1wt5c\_  
d1t4ka1 d5c1mb\_ d1it9l1 d1bz7a1 d1b2wh1 d1e4wl1 d1jnl1l d1yedb1  
d1za6b1 d3u7aa\_ d1igfh1 d3gnml1 d1orsa1 d1wejl1 d1a2ya\_ d1hxmb1  
d1gafh1 d2j4wh1 d1pz5a1 d1j05a\_ d1a3rh1 d4fq1l1 d1qfwh\_ d1eo8h1  
d1n7mh1 d4s11a\_ d1kegh1 d5da4a\_ d1iqwl1 d3whxb1 d1vgeh1 d1deeb1  
d1c12b1 d1t2ql1 d1ad9a1 d3gsnb1 d3b2uc1 d1ggbh1 d1t3fb1 d1nak1l  
d4ocmc\_ d1lila1 d2v7hb3 d2esve1 d1mcoh1 d2qr0b1 d2q3aa\_ d1ct8a1  
d1kcr1l d2pxyb\_ d2uzih\_ d5c3ld\_ d3durb\_ d1c5c1l d2ak4e1 d1d17h\_  
d1xiwd\_ d1mlba1 d1rmfl1 d1i7zb1 d1dlfl\_ d2xa3a\_ d5bq7b1 d1dqqb1  
d3h42l1 d1egjh1 d1kcv1l d1fe8l1 d2j6el1 d1f3rb2 d1lk3l1 d1sm3h1  
d1q0xh1 d1ghfh1 d7fab1l d1igch1 d1lo0h1 d4idla\_ d5c2bl\_ d1jrh1l  
d1il1a1 d3zhda1 d4kfzc\_ d1b0wa\_ d1e6oh1 d1mex1l d4krpb\_ d1fnsh1  
d1ncwh1 d4hgma\_ d4eigb1 d4rzca\_ d2mpal1 d4y5xa\_ d5en2b1 d3lrga1  
d4ej1c1 d1rhha1 d1j05b\_ d1forh1 d1q9wb1 d2wzpd\_ d2aq2a1 d1h0da1  
d3revb1 d2ij0c1 d1tzha1 d4m7jl1 d1k6ql1 d3b9kc1 d1igml\_ d3qeua1  
d1dsfl\_ d1ce1h1 d1kcu1l d1zvha1 d1zvoa1 d1tqbb1 d1ay1l1 d2qscl1  
d2cgrh1 d1nl0h1 d1ken1l d3eo0a1 d4n9ob1 d1n0xl1 d3k1kc\_ d2aq2b1  
d1ck1a1 d1enfa1 d1i4pa1 d1vloa1 d1et9a1 d1esfa1 d2g9hd1 d4ohja1  
d1klud1 d1bxta1 d1eu3a1 d1ty0a1 d2cqva1 d1fhga\_ d2k1ma\_ d2d12a1  
d1biha3 d1biha1 d1biha4 d3qp3a1 d1g1ca\_ d1gxea\_ d1cvsc2 d1cvsc1  
d1xmw2 d1m4ka2 d2otpa2 d1biha2 d1rhfa2 d2fcba2 d2fcba1 d1wwbx\_  
d1gsma2 d1epfa1 d1epfa2 d2dava1 d1waaa\_ d1f97a2 d1x44a1 d1vcaa2

d1fnla2 d1fnla1 d3b5ha2 d3h8na2 d3h8na1 d1jbja1 d1jbja2 d1pd6a\_  
d1f2qa2 d1f2qa1 d3cx2a\_ d1nbqa2 d3b5ha1 d1n26a1 d1xiwb\_ d1xaau\_  
d1fltx\_ d2ifga1 d1olla1 d1olla2 d1cs6a4 d1cs6a3 d1cs6a2 d1cs6a1  
d2gw5a2 d1sy6a1 d1xiwa\_ d1lucta2 d1lucta1 d1ry7b2 d1gl4b\_ d1qz1a3  
d1olza1 d2c9aa1 d1wwca\_

**Family-23 (b.121.4.1)**

**Positive dataset contains 11 protein sequences.**

d4q4w1\_ d2x5ia\_ d4iv1a\_ d4gb31\_ d2wzr3\_ d2x5ic\_ d1zba3\_ d3vbhc\_  
d4q4w3\_ d1zba1\_ d4iv1c\_

**Negative dataset contains 3919 protein sequences.**

d1m32a\_ d1libja\_ d1c7na\_ d1iuga\_ d4q75a\_ d2bkwa1 d1t3ia\_ d1n8pa\_  
d1qz9a\_ d1jff9a\_ d1leg5a\_ d1p3wa\_ d3kgwa\_ d1c11a\_ d2ctza1 d1vjoa\_  
d2rfva\_ d1gc0a\_ d1cs1a\_ d2ch1a1 d1qgna\_ d1pffa\_ d1elua\_ d1xfda2  
d1u08a\_ d11c5a\_ d1b5pa\_ d2ay1a\_ d1bw0a\_ d3pd6a\_ d7aata\_ d2csta\_  
d1fg7a\_ d4wlha\_ d1o4sa\_ d1v2da\_ d1gdea\_ d1m6sa\_ d1v72a1 d1svva\_  
d1ajsa\_ d1wsta1 d2f8ja2 d11k9a\_ d1vp4a1 d1xi9a1 d2gb3a1 d1yaaa\_  
d1xkta1 d2hfka\_ d1jmkc\_ d5d3ka\_ d2cfba1 d1dfoa\_ d1o69a\_ d1bj4a\_  
d3k28a\_ d2bwpa\_ d3lg0a\_ d2fnua\_ d3ou5a\_ d1z7da1 d1b9ha\_ d1iaya\_  
d4msoa\_ d1bs0a\_ d1s0aa\_ d1sffa\_ d3tqxa\_ d1mdoa\_ d3qboa\_ d3pgya\_  
d1bjna\_ d2dkja\_ d1ejia\_ d1vefa1 d4wxga\_ d3bs8a\_ d3gbxa1 d1w23a\_  
d1sefa\_ d1sfna\_ d1rc6a\_ d3lgia\_ d3i77a\_ d2z9ia2 d4nsva\_ d1lcya2  
d4jcna\_ d1agja\_ d1os8a\_ d1hpga\_ d1p3ca\_ d111ja\_ d1dzka\_ d4tlja\_  
d2a2ua\_ d4wfva\_ d3t1da\_ d4iaxa\_ d3zq3a\_ d2nnda\_ d1i4ua\_ d1kxaa\_  
d1bbpa\_ d1kt7a\_ d1lexsa\_ d3s26a1 d11f7a\_ d1qfta\_ d4gh7a\_ d1z24a1  
d1qabe\_ d1xkia\_ d1ew3a\_ d3bx7a\_ d4iawa1 d1n0sa\_ d1gkab\_ d3kzaa\_  
d2k23a\_ d219ca1 d2joza1 d1gm6a\_ d3kffa\_ d3saoa1 d1e5pa\_ d1yupa1  
d1iiua\_ d2wo3b\_ d1shxa\_ d3p0ya1 d1igra1 d1igra2 d1n8yc1 d1m6ba2  
d1m6ba1 d1f56a\_ d1bypa\_ d1azca\_ d1ws8a\_ d3u25a\_ d1cuoa\_ d1id2a\_  
d1rkra\_ d2iaac\_ d4dp1x\_ d1nwpa\_ d2gima\_ d2i7sa\_ d1qhqa\_ d1gyca3  
d1hfua2 d1kbva1 d1kbva2 d1sdda1 d1sdda2 d1gyca1 d1gyca2 d1mzya1  
d2bw4a1 d1aoza1 d1aoza3 d1aoza2 d1kyaa2 d1kyaa3 d1kyaa1 d1mzya2  
d4e9sa1 d1sddb1 d1sddb2 d1hfua1 d1hfua3 d1oe1a2 d1v10a2 d1v10a3  
d1v10a1 d2dara2 d2dara1 d1wyha2 d2dloa2 d1rutx4 d1rutx3 d2cuqa2  
d1x41a2 d1x41a1 d1x3ha2 d1x3ha1 d2d8za1 d1x61a2 d1x6aa1 d1x6aa2  
d2cora2 d2cora1 d1v6ga1 d1v6ga2 d2d8za2 d1x64a1 d1x64a2 d1b8ta1  
d2co8a1 d1x63a2 d2dj7a2 d2dj7a1 d2cu8a2 d2cu8a1 d1g47a2 d1g47a1  
d1j2oa1 d1wyha1 d2dloa1 d1wiga1 d1wiga2 d2cupa2 d2cupa3 d1x68a1  
d2d8ya2 d2d8ya1 d1m3va2 d1x62a1 d1x68a2 d1x61a1 d1b8ta3 d1b8ta2  
d2d8xa2 d2d8xa1 d1x4ka1 d1x4ka2 d2cuqa1 d1m3va1 d2co8a2 d1x63a1  
d2cura1 d2cura2 d1x62a2 d2bema\_ d1pama1 d1ea9c1 d1qhoa1 d2fhfa2  
d2fhfa1 d1k3ia1 d1j0ha1 d1cx1a1 d2bhua1 d1edqa1 d1f1sa2 d1ut9a2  
d1gvia1 d1txka1 d1zx5a1 d1qwra\_ d2phla2 d2phla1 d1fxza2 d1fxza1  
d1lrha\_ d1uija1 g1dgw.1 d2v09a\_ d1uika2 d1uika1 d1nepa\_ d1ktja\_  
d1ds6b\_ d1fstb\_ d1ex0a1 d1v70a\_ d2f4pa1 d1yhfa1 d1eixa\_ d3exra\_

d2ffca1 d2fdsa1 d3n3ma1 d2czda\_ d2yyua\_ dlvqta1 d1dbta\_ d3ldva1  
d2bjca1 d2hsga1 d1qpza1 d1ydwa2 d2nvwa2 d1h6da2 d1zh8a2 d1xeaa2  
d1tltta2 d1r0ka3 d1j5pa3 d1vkoa2 d1vm6a2 d3qvsa2 d1p1ja2 d2ovga\_  
d1sq8a\_ d1rzsa\_ d3kz3a\_ d3orca\_ d3gpdg2 d2q49a2 d1hdgo2 d2g17a2  
d2cvoa2 d2czca1 d3pwka2 d1obfo2 d1i32a2 d1zyao2 d2pkqo2 d2hjsa2  
d1cf2o2 d1vkna2 d1nvmb2 d2msya\_ d2djoa1 d2r5za\_ d1au7a1 d1f43a\_  
d2lmda1 d1akhb\_ d1s7ea1 d3nara\_ d1zq3p1 d2craa1 d1mija\_ d4uuta\_  
d3a01a\_ d1x58a1 d3rkqa1 d3cmya1 d2cqxa1 d2da6a1 d1e3oc1 d1fjla\_  
d1mh3a1 d1ig7a\_ d1x41a1 d1wh7a1 d1gt0c1 d2mw8a\_ d1lfup\_ d1x2ma1  
d1b72a\_ d1wi3a1 d1jgga\_ d1wjha1 d1x2na1 d1mnm\_ d2cuea1 d3k2aa\_  
d2hosa\_ d2jwta2 d1pufa\_ d1ooc1 d2hi3a\_ d1b8ia\_ d4j19a\_ d3lnqa\_  
d1wh5a1 d1b8ib\_ d1fexa\_ d2cqra1 d1guua\_ d1ug2a1 d2cqqa1 d2ajea1  
d4a69c\_ d1h8ac1 d2crga1 d2iw5b1 d1xc5a1 d1ofcx1 d2cu7a1 d1wgxa1  
d2cjja1 d2ckxa1 d1gvda\_ d1hcra\_ d1tc3c\_ d1u78a2 d2iu5a1 d1zk8a1  
d2g7sa1 d2fd5a1 d2np5a1 d1z0xa1 d2id6a1 d2d6ya1 d2i10a1 d2oi8a1  
d3c07a1 d2ns7a1 d2fq4a1 d2yvea1 d1t33a1 d2o7ta1 d1rcta1 d2np3b1  
d2g7ga1 d2gena1 d2fbqa1 d2g71a1 d2gfna1 d2g3ba1 d2jj7a1 d2hyja1  
d1sgma1 d1ui5a1 d2hkua1 d2id3a1 d4jyka1 d3lv8a\_ d1s3ga1 d1zaka1  
d1s4qa\_ d3tvta2 d1uf9a\_ d1khta\_ d1ckea\_ d1osna\_ d1p5zb\_ d4tmka\_  
d3cm0a\_ d1tmka\_ d1jaga\_ d3h86a\_ d1t0hb\_ d1nn5a\_ d2h92a\_ d3kb2a1  
d2c95a1 d1yj5a2 d1kgda\_ d1ly1a\_ d2ak3a1 d1vyva2 d1deka\_ d2grja1  
d1p3ja1 d1y63a\_ d1e4ya1 d1s96a\_ d3iija1 d1lvga\_ d1nksa\_ d1vyua2  
d4e22a\_ d1qf9a\_ d1jjva\_ d1q3ta\_ d1ki9a\_ d1lw7a2 d1teva\_ d1kjwa2  
d1gsia\_ d1m7ga\_ d1x6va3 d1z0ja1 d3umra2 d3gj0a1 d2gaoa1 d1yzga1  
d1x3sa1 d1g7sa4 d1puja\_ d1udxa2 d1kk1a3 d2o52a\_ d1jwyb\_ d1zcaa2  
d1zcba2 d2fv8a1 d2cjwa\_ d3dz8a1 d1xzpa2 d1vg8a\_ d4qxaa\_ d2ew1a1  
d1x1ra1 d2bcgy\_ d3doea1 d3cona\_ d3rega\_ d3wyga\_ d1upta\_ d2b6ha1  
d1zd9a1 d1lnza2 d1r5ba3 d1n0ua2 d2f91a1 d2rhda\_ d3q3jb\_ d3q85a\_  
d1efma1 d1r8qa\_ d2gf9a1 d2akab1 d1ek0a\_ d1z08a1 d2gcoa1 d2dy1a2  
d4g01b\_ d2cxxa1 d1svia\_ d3q72a\_ d1ni3a1 d4ac9a4 d2erxa1 d2bmea\_  
d1wxqa1 d2gf0a1 d4ldja1 d1zunb3 d1d5ca\_ d4lv5b\_ d1efca3 d1kmqa\_  
d2g6ba1 d3lrpa\_ d1tada2 d2y8ea\_ d4rd4a1 d1z06a1 d2heia\_ d3a58b\_  
d1u01a2 d1d2ea3 d1zj6a1 d2ocba\_ d3rwoa\_ d1mr3f\_ d2e9sa1 d4u5xa1  
d2iwra\_ d2fn4a1 d3bwdd\_ d2nzja1 d2atva1 d2ksqa\_ d3l43a\_ d1mkya2  
d1mkya1 d1wmsa\_ d1jnja3 d2rmka\_ d1f6ba\_ d1f60a3 d1gota2 d1jala1  
d2fh5b1 d1g16a\_ d2wblc\_ d1m7ba\_ d1wf3a1 d1f5na2 d1t9ha2 d1z6xa1  
d1z0aa1 d2fg5a1 d2a5ja1 d2bcjq2 d1s0ua3 d1ky3a\_ d4y0va\_ d4lhwa\_  
d2qmea1 d2atxa1 d1legaa1 d1ryha\_ d1moza\_ d1nrjb\_ d2erya1 d3bfka\_  
d1puia\_ d1fzqa\_ d3j3az1 d3t5ga\_ d1shza2 d3defa\_ d2f7sa1 d3raba\_  
d3tsoa\_ d3aq4a\_ d2a17a1 d3sfva1 d3bc1a\_ d1sdma\_ d3h4sa1 d2heha\_  
d2grya\_ g3kin.1 d1kk8a2 d1br2a2 d1goja\_ d1f9va\_ d2mysa2 d1lkxa\_  
d3t0qa\_ d4db1a1 d3gbja\_ d1ry6a\_ d1v8ka\_ d1k8ka2 d1k8ka1 d3uleb1  
d3i33a2 d3i33a1 d1bupa1 d1dkgd2 d1dkgd1 d4ci6a2 d1jcfa1 d4a2ba2  
d2fxua1 d1yaga2 d1yaga1 d4cbua2 d1bupa2 d1g99a1 d2e1za2 d2e1za1

d1saza1 d1saza2 d1liqca2 d1leb7a2 d1leb7a1 d1nmla2 d1nmla1 d1niral  
d1qksa1 d2d0oa3 d2d0oa2 d1nbwa2 d1hroa\_ d4gedb\_ d3zooa\_ d1mz4a\_  
d1gu2a\_ d1f1fa\_ d1dvva\_ d1c6ra\_ d1c75a\_ d1e29a\_ d1gdva\_ d1cnoa\_  
d1h32b\_ d1co6a\_ d2bh4x\_ d2aiua\_ d5cytr\_ d1jdl\_ d1i8oa\_ d2zboa\_  
d3dmia\_ d1ls9a\_ d1wvec\_ d2yk3a\_ d3ph2b\_ d1dw0a\_ d5aura\_ d1ql3a\_  
d1qn2a\_ d1f1ca\_ d4zzva\_ d2xspa\_ d1leg1a\_ d4v20a\_ d1ojja\_ d4ipma1  
d1gpia\_ d4csia\_ d3pfza\_ d3ovwa\_ d2yoka\_ d2nqya\_ d1h4ga\_ d1hixa\_  
d1oa2a\_ d1olra\_ d3b7ma\_ d4h7ma1 d3wp3a\_ d2vgda\_ d1ligoa\_ d3zsea\_  
d2nlra\_ d3wx5a\_ d1oa3a\_ d1pvxa\_ d1m4wa\_ d1f5ja\_ d1oa4a\_ d1ks5a\_  
d4ix1a1 d2ah2a1 d1h32a1 d1fwa1\_ d1libya\_ d1evsa\_ d1pvhb\_ d1z7ca\_  
d1huwa\_ d1bgea\_ d1rhga\_ d1f6fa\_ d1f45b\_ d1ilrb\_ d1axia\_ d1letea\_  
d3tgxb\_ d1scfa\_ d2z3qa1 d3qb1a\_ d1hula\_ d1m48a\_ d4nkqb\_ d1leera\_  
d1v7mv\_ d5e4ea\_ d2o27a\_ d3b5ka\_ d2psma1 d4zf7a\_ d3uf5a\_ d4x51a\_  
d1d9ca\_ d4ypgc1 d3oq3a\_ d1lqsl\_ d1n1fa\_ d1au1a\_ d1wu3i\_ d3bes1\_  
d3ux9a\_ d1v8fa\_ d2ejca\_ d3muea1 d3q12a1 d4dnxa2 d1m8pa2 d1g8fa2  
d1jhda2 d1x6va2 d3rbaa\_ d2qtra\_ d1nupa\_ d3l92a\_ d1f9aa\_ d1qjca\_  
d2h29a\_ d1vlha\_ d1od6a\_ d1lw7a1 d4ruka\_ d2el7a\_ d1iq0a2 d1lirxa2  
d1r6ta2 d1livsa4 d2cyba\_ d1rqga2 d1j09a2 d2yxna\_ d1f7ua2 d1h3fa1  
d1ffya3 d2g36a1 d1nzja\_ d1jila\_ d1n3la\_ d1i6la\_ d1pfva2 d1h3na3  
d3n9ia\_ d3sz3a1 d3sw2a\_ d1moxc\_ d1edmb\_ d1aut12 d1aut11 d1nqlb\_  
d1dva11 d1szba2 d1kigl\_ d2y5f1\_ d1lijqa2 d1gk5a\_ d1g1sa2 d1nt0a3  
d1xdtr\_ d1lmja2 d1lmja1 d1nzia2 d2wphe\_ d1klil\_ d1pfx12 d1pfx11  
d1p9ja\_ d1glta2 d1f7ea\_ d4yzub\_ d1m1xb4 d2y5ia\_ d1qlsa\_ d1psra\_  
d3n22a\_ d2egda\_ d4ggfc\_ d2wcea\_ d2luca\_ d4aqia\_ d3nsia\_ d2lp3a\_  
d1j55a\_ d1a4pa\_ d1nsha\_ d1exra\_ d1tiza1 d1nyaa\_ d1g8ia\_ d1ggwa\_  
d1wdcc\_ d3fwba\_ d1ggza\_ d2o5ga\_ d1ctaa\_ d1m45a\_ d3i5gc\_ d1sl8a\_  
d1fpwa\_ d2scpa\_ d2roaa\_ d4aqra\_ d3pn7b\_ d1br1b\_ d2mysb\_ d1s6ca\_  
d1bjfa\_ d2obha\_ d1jfk\_ d1jf0a\_ d1qv0a\_ d1lkja\_ d2mlfc\_ d2m97a\_  
d2d8na\_ d4by5a\_ d1jbaa\_ d4nqga\_ d1wdcb\_ d2mysc\_ d1j7qa\_ d1s6ia\_  
d1uhka2 d1r2ua\_ d1dtla\_ d3kf9a\_ d3pn7c\_ d1qjta\_ d1fi6a\_ d1c07a\_  
d5d67d\_ d1tuza\_ d1leg3a1 d1leg3a2 d2zkmx1 d1snla\_ d1sfsa\_ d1wkya2  
d1uuqa\_ d3wh9a\_ d4m1ra\_ d4xuya\_ d2je8a5 d4bf7a1 d3cuia\_ d1ur4a\_  
d1qw9a2 d1odza\_ d2vzsa5 d1bqca\_ d2x2ya1 d1hjqa\_ d1qnra\_ d4y7ea1  
d1vjza\_ d4k68a\_ d2v3ga\_ d4hpga\_ d1nofa2 d1nq6a\_ d1h4pa\_ d1aq0a\_  
d3ziza\_ d4bs0a\_ d1ecea\_ d1h1na\_ d1ta3b\_ d1w91a2 d1l1wa\_ d1uhva2  
d1us3a2 d1legza\_ d7a3ha\_ d1tvna1 d3nyda1 d1ghsa\_ d2cyga1 d4xv0a\_  
d2c8na2 d1w32a\_ d3emca\_ d1v6ya1 d1foba\_ d2uwfa1 d2fgla\_ d3niya1  
d2c0ha1 d1rh9a1 d1yq2a5 d1szna2 d1fa2a\_ d1pama4 d5do8a1 d1lea9c3  
d1hx0a2 d2fhfa5 d1qhoa4 d1avaa2 d1m53a2 d4m8ua1 d2gjpa2 d1lwha2  
d4howa1 d1ktba2 d1j0ha3 d3vm5a1 d2x1ia\_ d1wzaa2 d1uasa2 d2diea1  
d1mxga2 d1ht6a2 d1eswa\_ d1liv8a2 d5cpsa\_ d1ud2a2 d1zjaa1 d3gbea1  
d1kwga2 d1wdpa\_ d1gcya2 d1g5aa2 d1hvxa2 d3dhpa2 d2bhua3 d4do4a1  
d3qgva1 d1e43a2 d1g94a2 d2d3na2 d1gjwa2 d1gvia3 d1x1na1 d1r7aa2  
d1tz7a1 d2x42a1 d1tr9a1 d3abza1 d4toqa\_ d1wb0a1 d1w9pa1 d1leoka\_



d1itxa1 d1kfw1a1 d1goia2 d1ledqa2 d2gsja\_ d1hjxa1 d1jnda1 d1vf8a1  
d3wdpp1 d3wq5a\_ d1gnxa\_ d4gxpa\_ d4hz8a\_ d3aiua\_ d1wcga1 d1qvba\_  
d3ahxa\_ d1v02a\_ d2dgaa\_ d1pbga\_ d1vffa1 d1qoxa\_ d4ha4a\_ d1mixa2  
d1e5wa2 d1isna2 d2a16b2 d1g4ma2 d1lid1a\_ d2hmta\_ d1lssa\_ d2v76a\_  
d1wj1a1 d1aqca\_ d1qqga2 d1qqga1 d1n3ha\_ d4dbba\_ d3f0wa1 d1p3ra\_  
d1wgua1 d2cy4a1 d3hqca\_ d1wvha1 d1xr0b1 d1wgqa1 d1v89a1 d2coda1  
d1zc3b\_ d1wg7a1 d1u5ea1 d1v61a1 d2coca1 d2ys1a1 d1v5pa1 d1ntya2  
d1wjma1 d1wi1a1 d1u29a\_ d1xx0a1 d1unqa\_ d2zkmx3 d1fhoa\_ d1v88a1  
d2adza1 d1x1fa1 d1p6sa\_ d2coaa1 d1btka\_ d1v5ma1 d1faoa\_ d2x18a\_  
d1dyna\_ d1x1ga1 d4kaxb\_ d2j59m1 d1ki1b2 d1xcga2 d1txda2 d1u5da1  
d1dbha2 d1wlha\_ d1upqa\_ d1v5ua1 d1foea2 d2fj1a1 d1eaza\_ d2dfka2  
d2cofa1 d1kz7a2 d1g8fa3 d9ldta1 d2ewda3 d1up7a1 d2dfda1 d1s6ya1  
d1vjta1 d7mdha1 d1hyea1 d1t2da1 d1ojsa3 d1b8pa1 d1ldna1 d1hyha1  
d1civa1 d2a92a1 d1ez4a1 d1i0za1 d1y6ja1 d1gv0a1 d1ur5a1 d1llda1  
d1obba1 d1v8ba1 d1gdha1 d1l7da1 d2dlda1 d1mx3a1 d1ygya1 d1qp8a1  
d1li4a1 d1j4aa1 d2naca1 d1npya1 d3t4ea2 d1a4ia1 d1o0sa1 d2hk9a2  
d2egga2 d1b26a1 d1bvua1 d1gq2a1 d1c1da1 d1leha1 d1gtma1 d1nvtal  
d3dona2 d1ledza1 d1gpja2 d1vi2a1 d1p77a1 d1nyta1 d1b0aa1 d1vl6a1  
d1v9la1 d1kola2 d1f8fa2 d1qora2 d1vj0a2 d1cdoa2 d1gu7a2 d1d1ta2  
d1xa0a2 d2dm6a2 d1jvba2 d1rjwa2 d1llua2 d1h2ba2 d1tt7a2 d1piwa2  
d1o89a2 d1liz0a2 d1e3ja2 d1yb5a2 d1uufa2 d1vj1a2 d1e3ia2 d3gpdg1  
d1vc2a1 d2nvwa1 d1u8fo1 d1ydwa1 d1hdgo1 d2g17a1 d1cf2o1 d2czca2  
d1r0ka2 d1obfo1 d2cvoa1 d1ebfa1 d1h6da1 d1i32a1 d1zh8a1 d2q49a1  
d1qkia1 d1j5pa4 d3pzra1 d1xeea1 d1vkoa1 d1vm6a3 d3qvsa1 d2pkqo1  
d1b7go1 d1gr0a1 d1p1ja1 d1lc0a1 d1j0xo1 d3pwka1 d2hjsa1 d1zyao1  
d1vkna1 d1tlta1 d1nvmb1 d3sjua\_ d3ojfa1 d1xu9a1 d2jjya1 d1n7ha\_  
d1ylpa1 d1h5qa\_ d1jtva\_ d4fs3a\_ d2bkaa1 d1gy8a\_ d2c5aa1 d1ulsa\_  
d1ooea\_ d2b69a1 d1y5ma1 d1spxa\_ d1aela\_ d1bxka\_ d1ydea1 d1gega\_  
d1hdoa\_ d1o5ia\_ d1e6ua\_ d1snya1 d2rhca\_ d3zv4a\_ d5ceja\_ d2d1ya1  
d3w8ea\_ d2fmua1 d1x1ta\_ d1rpna\_ d3ay7a1 d1k2wa\_ d1eq2a\_ d2hrba1  
d3ruaa\_ d2ew8a1 d4hwka\_ d1xgka\_ d2bd0a1 d1yo6a1 d2a35a1 d2ntva\_  
d1vl8a\_ d1hdca\_ d4bkua\_ d2ag5a1 d2q45a\_ d1nffa\_ d4iy1a\_ d1zbqa1  
d1kewa\_ d1ek6a\_ d1ja9a\_ d2q46a2 d1iy8a\_ d1cyda\_ d2ptga\_ d1hxha\_  
d1uzma1 d3lyla\_ d4m89a\_ d3wyea\_ d2blla1 d1w6ua\_ d1sb8a\_ d2q2va\_  
d4nr0a\_ d1e6wa\_ d2gasa\_ d3oiga1 d2bgka1 d1mxha\_ d1vl0a1 d1rkxa\_  
d1r6da\_ d1wmaa1 d1e7wa\_ d2c07a1 d1xkqa\_ d3tzha\_ d1g0oa\_ d3lz6a\_  
d1qyca\_ d1ledoa\_ d1gz6a\_ d1oc2a\_ d1t2aa\_ d1zema1 d2xoxa\_ d1z45a2  
d1geea\_ d1p33a\_ d3lt0a\_ d4e6pa\_ d2wyua\_ d1db3a\_ d4q9na\_ d1xhla\_  
d4o1ma\_ d1fmca\_ d2uvda\_ d2gdza1 d1uaya\_ d2z1ma\_ d2o23a2 d2fr1a2  
d2fr1a1 d1qsga\_ d1qyda\_ d4zjua\_ d2a4ka1 d1yb1a\_ d1wvga1 d1yxma1  
d3f4ba\_ d1mg5a\_ d1xg5a1 d3nqyb\_ d4gera\_ d1bqba\_ d4c5pa\_ d2bsza1  
d4bgfa\_ d1w4ta1 d1mdwa\_ d1qxpa4 d1ziva1 d1zcma1 d3ioqa\_ d1fh0a\_  
d1o0ea\_ d1m6da\_ d2cb5a\_ d1cs8a\_ g8pch.1 d1s4va\_ d2pnsa\_ d1vsna1  
d1mira\_ d1liwda\_ d2oula\_ d7pcka\_ d3bwka\_ d3bcna\_ d2p86a\_ d1pvja\_

d1pcia\_ d1gece\_ d1deua\_ d4bs6a\_ d1xkga1 d1cqda\_ d1jqpa2 d2c0ya\_  
d2bdza\_ d3p5ua\_ d2o36a\_ d2jk6a2 d2jk6a1 d1feca1 d1feca2 d1lpfa1  
d1lpfa2 d1xhca1 d1xhca2 d1dx1a2 d1dx1a1 d1m6ia2 d1onfa1 d1onfa2  
d3lada2 d3lada1 d1w4xa1 d1w4xa2 d1gesa2 d1mo9a1 d1xdia1 d1fl2a2  
d1fl2a1 d1fcda1 d1fcda2 d1h6va2 d1h6va1 d1mo9a2 d1gv4a2 d1gv4a1  
d2gv8a2 d2gv8a1 d1aoga1 d1aoga2 d1hyua1 d1ebda1 d1ebda2 d3dk9a1  
d1q1ra2 d1q1ra1 d1gesa1 d1pn0a1 d1reoa1 d1ju2a1 d2f5va1 d3c96a1  
d2gmha1 d1gpea1 d1o5wa1 d1n4wa1 d1k0ia1 d2dw4a2 d2ivda1 d1seza1  
d2voua1 d1kdga1 d2bcgg1 d2bcgg2 d1d5ta1 d2y8ga\_ d1xkea1 d1k5db\_  
d2y8fa\_ d1b9ra\_ d1offa\_ d1frra\_ d3wcqa\_ d1e9ma\_ d1l5pa\_ d1wria\_  
d1i7ha\_ d3av8a\_ d1czpa\_ d1rfka\_ d3p1ma1 d3b2ga\_ d2bt6a2 d1jmx4  
d1pbya3 d1pbya4 d1jmx2 d1jmx1 d1pbya1 d1r7ha\_ d1faaa\_ d1wika1  
d1xfla\_ d1ttza1 d2f51a1 d1ti3a\_ d1nhoa\_ d1sena\_ d2i4aa\_ d1lep7a\_  
d1zmaa1 d1fo5a\_ d3lefa1 d3diea1 d2yana1 d1z6na1 d1oaza\_ d3zywa1  
d4aj8a\_ d1nm3a1 d4fiwa\_ d1wmja\_ d4hs1a1 d1iloa\_ d1xwaa1 d1wjka1  
d2vmla\_ d1fb6a\_ d1gh2a\_ d1h75a\_ d1nw2a\_ d1kx5b\_ d3a6na\_ d4m6ba2  
d2nqbd\_ d3wkjd\_ d2yfwe\_ d4h9na\_ d5bnxa\_ d1kx5c\_ d3r45a\_ d1eqzb\_  
d4jjnb\_ d1f66c\_ d1eqza\_ d4wnnb\_ d1kx5a\_ d1u35c1 d1lid3a\_ d2nqbc\_  
d1kx5d\_ d3us3a3 d3us3a1 d1tafa\_ d1bh9b\_ d1tafb\_ d1jfib\_ d1q9ca\_  
d1h3ob\_ d2byka1 d1n1ja\_ d4g92b\_ d1bh9a\_ d1jfia\_ d1h3oa\_ d2bykb1  
d1pd212 d1nhya2 d2a2ra2 d1k0dd2 d1f2ea2 d1gsua2 d1f3ba2 d2fhea2  
d2pvqa1 d1tw9a2 d1oyja2 d1e6ba2 d3ik7a1 d4is0a1 d1r5aa2 d1jlva2  
d1m0ua2 d3gtub2 d1z9ha2 d1okta2 d1axda2 d2gsra2 d1tu7a2 d1k3ya2  
d1zgma1 d1b48a2 d1gnwa2 d1gwca2 d2gsta2 d1glqa2 d1oe8a2 d1pn9a2  
d1v2aa2 d1fw1a2 d1duga2 d3vrda1 d3vrda2 d1fcdc2 d1fcdc1 d1h1oa2  
d1h1oa1 d1m70a2 d1ovna2 d1a0rp\_ d1ig8a1 d1czan2 d1czan3 d1czan1  
d1ig8a2 d1czan4 d1bg3a4 d1bg3a3 d1bg3a1 d1qqya\_ d1gd6a\_ d1livma\_  
d2gv0a\_ d1iiza\_ d2z2fa\_ d1j8xa\_ d1ghla\_ d1b9oa\_ d1741a\_ d1691a\_  
d2o4wa\_ d1p37a\_ d1k28a3 d1xjta1 d1jtma\_ d2f2qa\_ d4e97a1 d2za0a\_  
d2c21a1 d1f9za\_ d1s5ja2 d1qhta2 d4dlea2 d1tgoa2 d3py8a2 d1q8ia2  
d2py5a2 d1d5aa2 d1qsta\_ d2beia1 d4m3sa\_ d1u6ma1 d1ygha\_ d1yk3a1  
d3dr6a\_ d1xmta\_ d1z4ea1 d2ge3a1 d1bo4a\_ d2fiaa1 d2jdca1 d1y9wa1  
d3to7a\_ d1wwza1 d2fl4a1 d2ozua1 d2b5ga\_ d2cy2a1 d2p0wa\_ d1cm0a\_  
d4pswa\_ d1yrea1 d1yr0a1 d1m4ia\_ d2gana1 d1yvka1 d2g3aa1 d1y7ra1  
d2euia1 d1q2ya\_ d2fsra1 d1xeba\_ d2ae6a1 d1cjwa\_ d1qsma\_ d2aj6a1  
d1y9ka1 d1i12a\_ d1vkca\_ d2atra1 d1n71a\_ d2d4pa1 d2fiwa1 d2fe7a1  
d1tiqa1 d2ou2a\_ d1yx0a1 d2fcka1 d1p0ha\_ d2j8ma\_ d2pq8a\_ d1z4ra1  
d1s3za1 d1ufha\_ d1ax4a\_ d1c7ga\_ d2v1pa1 d2ez1a\_ d1xvqa1 d1pn0a2  
d3hy2a\_ d2cvba1 d1o8xa\_ d1lu4a\_ d1we0a1 d2bmx1 d2a4va1 d1psqa\_  
d1xiya1 d1q98a\_ d1n8ja\_ d1zofa1 d2ggta\_ d3tjja\_ d4je1a1 d3s9fa\_  
d2zcta\_ d1qmva\_ d1jfua\_ d2b1ka\_ d5dvba1 d2b5xa1 d2v2ga\_ d1st9a\_  
d3tb2a\_ d4llra\_ d4fh8a1 d1e2ya\_ d1knga\_ d2h30a\_ d1i5ga\_ d2z9sa\_  
d2f8aa1 d1tp9a1 d2b7ka\_ d1nm3a2 d3hvva\_ d2wfca1 d4kcea\_ d1xvwa1  
d4gqca1 d3qpma\_ d4k1fa\_ d1zsoa1 d1gpla\_ d1prxa\_ d1rmka\_ d1ixta\_

d1eyoa\_ d1cnna\_ d1fu3a\_ d1g1pa\_ d1f3ka\_ d3kasa1 d3bila3 d1e88a1  
d1l6ja4 d1eaka4 d1eaka3 d1l6ja3 d1h8pa2 d1h8pa1 d1etha2 d1w52x1  
d2ppla1 d1hpla2 d2oxea1 d1bu8a2 d1rpl1a2 d1ra6a\_ d1muka\_ d3gsza\_  
d1khva\_ d1te9a\_ d2xwha\_ d3uqsa\_ d3hkwa\_ d3n6ma\_ d2cjqa\_ d2xyma\_  
d1teba\_ d1te8a\_ d1u09a1 d4wfxa\_ d3tyqa\_ d2pgga1 d1c4xa\_ d1jl1a\_  
d2rhwa\_ d3groa\_ d1pjaa\_ d1thta\_ d1svpa\_ d1mbma\_ d3su6a1 d1cula1  
d4agka\_ d1vcpa\_ d1q31a\_ g1n11.1 d3e90b\_ d3u1jb\_ d3zxha\_ d1cgl1a\_  
d1rm8a\_ d1eaka2 d1hy7a\_ d2jsda\_ d1cxva\_ d1hv5a\_ d1i76a\_ d4qmea2  
d2xdata2 d1z5ha2 d4dv8a2 d1j7na1 d1jx4a2 d3gv5b1 d1t94a2 d3bq0a2  
d1cixa\_ d1y29a\_ d1v7fa\_ d2jtba\_ d1d1ha\_ d1g9pa\_ d1lupa\_ d1qk7a\_  
d1mb6a\_ d2a2va\_ d1niya\_ d1i25a\_ d1hvwa\_ d2mpqa\_ d1ie6a\_ d1kqha\_  
d1la4a\_ d2mxoa1 d1d10a\_ d1koza\_ d1qk6a\_ d1emxa\_ d1lqra\_ d1c6wa\_  
g1apy.1 d3ljqa\_ g1k2x.1 d1rypd\_ d1irua\_ d1rypc\_ d3unfk\_ d1rypa\_  
d1j2pa\_ d1irui\_ d1j2qh\_ d3unfh\_ d1m4ya\_ d1rypb\_ d1irul\_ d1irug\_  
d1iru2\_ d1q5rh\_ d1rypg\_ d1g3ka\_ d1iruf\_ d1q5qa\_ d1e94a\_ d1irub\_  
d1ryph\_ d3ty6a\_ d1iruj\_ d1iruk\_ d1rype\_ d1irud\_ d1irue\_ d3mi01\_  
d1rypf\_ d1iruh\_ d2z3ba\_ d1iruc\_ d3mka2\_ d1iru1\_ d1jgta2 d1lofda3  
d1lea0a3 d1ecfa2 d1q15a2 d1ct9a2 d1te5a\_ d1y14b1 d2nn6i1 d1i94l\_  
d2zjra2 d1smxa\_ d2qamc2 d1hh2p1 d2r7da1 d1rl2a2 d1wfga1 d3bzka4  
d1x6oa2 d3a0ja\_ d2j01d2 d2ja9a1 d4q15a\_ d1hr0w\_ d1luza\_ d2n3sa\_  
d2vnud1 d1h95a\_ d1go3e1 d2nn6h1 d1ne3a\_ d2mola\_ d1liz6a2 d1jjga\_  
d1e3pa2 d2ix0a3 d2ix0a2 d2lxja\_ d1ueba3 d1ueba2 d2z0sa1 d1u0la1  
d2ix0a1 d2eifa2 d2je6i1 d3i2za1 d2c35b1 d2ahob2 d1t9ha1 d3i4oa\_  
d2qall1 d1jt8a\_ d2nn6g1 d1g6pa\_ d3cama\_ d1i94q\_ d1d7qa\_ d2ba0a1  
d2vnud2 d2vnud3 d1khia2 d2qalq1 d1wi5a1 d1xta2 d1ny4a\_ d3ia2a\_  
d1a88a\_ d4dgqa1 d1zoia\_ d2flia1 d1h1ya\_ d1tqja\_ d1tqxa\_ d4lt9a1  
d3tc7a1 d3hoja\_ d3vnda\_ d3n18a1 d1geqa\_ d3nav1 d1v5xa\_ d4a2ra1  
d3tc6a1 d1ujpa\_ d4ijba\_ d1xcfa\_ d1vc4a\_ d1rd5a\_ d1qopa\_ d3b5va\_  
d2r80b\_ d1cqxa1 d1cg5a\_ d1gcvb\_ d3boma\_ d2h8fb\_ d2raoa\_ d3bj1a\_  
d4hrrb\_ d2r50a\_ d3d1kb\_ d2aa1b1 d3zhwa\_ d3hf4b\_ d3gdja\_ d1jebb\_  
d3bj1b\_ d1x9fb\_ d1wmub\_ d1gcva\_ d3bcqb\_ d3d4xb\_ d2dc3a\_ d3hf4a\_  
d4yu3a\_ d3k8ba\_ d1qpwb\_ d2r80a\_ d3bcqa\_ d1v4wa\_ d3wtgb\_ d1jl17a\_  
d4esaa\_ d1a9we\_ d3d1ab\_ d1fsla\_ d4h21a\_ d1v4wb\_ d1mwca\_ d1vhba\_  
d1jeba\_ d1spgb\_ d1h97a\_ d1q1fa\_ d1tu9a1 d3d1aa\_ d1hdsb\_ d3hyub\_  
d2zfb\_ d3fs4a\_ d1oj6a\_ d1shrb\_ d4h21b\_ d4yu3b\_ d1spga\_ d3hrwa\_  
d3qqra\_ d3at5a\_ d4wchd\_ d3hyua\_ d1cg5b\_ d1uc3a\_ d1hbra\_ d2raob\_  
d1outb\_ d4esab\_ d3gdjb\_ d3qqqa\_ d1x9fc\_ d3vrf1a\_ d1litha\_ d3mkba\_  
d3d4xa\_ d3mjpa\_ d1jl6a\_ d3fh9a\_ d1outa\_ d2dc3b\_ d1lit2a\_ d3eoka\_  
d3g46a\_ d1qpwa\_ d3vrfb\_ d1ch4a\_ d1x9fd\_ d1hdsa\_ d2zfa\_ d3mkbb\_  
d1or4a\_ d3wtga\_ d1a4fa\_ d3fh9b\_ d3bomb\_ d3cy5a\_ d3at5b\_ d1x9fa\_  
d2oifa\_ d4lmb\_ d1cpcb\_ d3v57a\_ d1kn1a\_ d1cpca\_ d4f0ta\_ d2vjha\_  
d4po5b\_ d1eyxa\_ d1alla\_ d4f0tb\_ d1b33b\_ d1b8db\_ d4h0mb\_ d1b33a\_  
d2vjhb\_ d4lm6b\_ d2vmlb\_ d1allb\_ d2vjta\_ d3dbja\_ d2vmla\_ d2vjtb\_  
d4f0ub\_ d1f99b\_ d4rmpa1 d1liaa\_ d1eyxb\_ d2uulb\_ d4lmsb\_ d4f0ua\_

d2bv8a\_ d1f99a\_ d2bv8b\_ d2c71b\_ d3dbjb\_ d4rmpb1 d1b8da\_ d4h0ma\_  
d3v57b\_ d1kn1b\_ d1liab\_ d2uula\_ d2j96a\_ d1azwa\_ d1hlga\_ d1r88a\_  
d1sfra\_ d4qeka\_ d3c8da2 d2pbla1 d1jkma\_ d1jjia\_ d1lzla\_ d1jjfa\_  
d4iuuaa3 d4bvva\_ d5hpga\_ d3k65a\_ d1ki0a3 d1ki0a2 d1ki0a1 d1a0ha1  
d1pmla\_ d3sp8a3 d2feba1 d1f74a\_ d3l21a\_ d2e1da\_ d1to3a1 d1w3ia\_  
d1sfla\_ d1n7ka\_ d1vcva1 d4imea\_ d1wa3a\_ d2ocza1 d1f2ja\_ d3m16a\_  
d2yxga\_ d3a5fa\_ d1fbaa\_ d1l6wa\_ d1xfba1 d1wx0a1 d1vpxa1 d1ojxa\_  
d1mxsa\_ d2a4aa1 d1xkya1 d3cq0a1 d3s1xa\_ d1f05a\_ d1fdja\_ d3cpra1  
d4d2ja\_ d1cg2a1 d1yloa2 d1y7ea2 d1y0ya3 d1lfwa1 d1vixa1 d1fnoa4  
d1vhoo2 d1ysja1 d1vhea2 d1z21a1 d2fvga2 d1vgya1 d1r3na1 d2grea2  
d1xmba1 g1q7l.1 d3rp2a\_ g1lucy.1 d1fuja\_ d2zchp\_ d3w94a\_ d1si5h\_  
d1lo6a\_ g2pka.1 d1cgha\_ d1kigh\_ d1a5ia\_ d3s9ba\_ d1hj8a\_ d1ao5a\_  
d2anya\_ d1q3xa1 d1gvza\_ d1azza\_ d4gsoa\_ d2f91a1 d1iaua\_ d1gdna\_  
d1eufa\_ g1fiw.1 d1eq9a\_ d4nfea\_ d2rdla\_ d1spja\_ d1elva1 d1a7sa\_  
d1ekbb\_ d1pfxc\_ d1yc0a\_ d2aiqa\_ g1fiz.1 d1fi8a\_ d4k60a\_ d4dgja\_  
d1mzaa\_ d1op0a\_ d3tjva\_ d1pytd\_ d1sgfg\_ g1gg6.1 d2eeka\_ g1rtf.1  
d1a0ja\_ d3g01a\_ d1pytc\_ d4e7na\_ d1ddja\_ d1z8ga1 d2hlca\_ d1npma\_  
d1lbrup\_ g1jou.1 d1sgfa\_ d1autc\_ g2hnt.1 g1kdq.1 d1orfa\_ d3s69a\_  
d4crga\_ d1fxya\_ d1bqya\_ d2ftba\_ d1pmpa\_ d2rcqa1 d1fdqa\_ d4lkpa\_  
d1sa8a\_ d1vyfa\_ d1lpja\_ d3vg7a1 d4azqa1 d1o8va\_ d5bvqa\_ d1p6pa\_  
d2qo4a\_ d1opba\_ d1yiva1 d1o1va\_ d4bvma1 d4tkba\_ d4i3ba\_ d1bwya\_  
d1ftpa\_ d1ggla\_ d4gkca\_ d1cbia\_ d3p6da1 d1kqwa\_ d2a0aa1 d2bk7a\_  
d3fjua\_ d1z5ra1 d1kwma1 d1uwya2 d1jqga1 d2c1ca1 d1dtda\_ d1h81a2  
d4lu0a\_ d3unda1 d3e9aa1 d1vr6a2 d1n8fa\_ d2qkfa\_ d1d9ea\_ d1o60a\_  
d1e69a\_ d1mv5a\_ d3g60a4 g1ii8.1 d1ewqa2 d1ji0a\_ d1qhla\_ d1v43a3  
d2wmfa1 d1vpla\_ d1g2912 d4a82a2 g1f2t.1 d2d62a1 d3tuic1 d2bbsa1  
d3g60a3 d2ixea\_ d1g6ha\_ d1sgwa1 d2qi9c\_ d3rlfa1 d3b60a1 d3d31a2  
d2pzea1 g1xew.1 d1jj7a\_ d1loxk2 d2onka1 d1wlwa\_ d1iwea\_ d1qf5a\_  
d1vmaa2 d1nija1 d1np6a\_ d2p67a1 d3ihla\_ d1okkd2 d1lsl1a2 d1slma2  
d1liona\_ d2v40a\_ d1dj3a\_ d3hida\_ d2vo1a1 d2g0ta1 d1vcoa2 d1j8mf2  
d1g3qa\_ d1xjca\_ d1p9ba\_ d1qzxa3 d1lihua2 d2qm8a\_ d1dj2a\_ d4ioja\_  
d1cp2a\_ d1yrba2 d1hyqa\_ d3gqba2 d1skye3 d1xp8a1 d1tf7a2 d1tf7a1  
d1ye8a1 d1skyb3 d2qe7d2 d4blta\_ d4huta\_ d3ltaa2 d4hyya\_ d2i3ba1  
d1cr1a\_ d3j9tb2 d3ntua2 d1vdza1 d2z43a\_ d1e9ra\_ d1nlfa\_ d3ziaa2  
d1n0wa\_ d1g6oa\_ d3ziad2 d3j9ta2 d1pzna2 d3gqbb2 d2i49a\_ d1nnfa\_  
d1xvxa\_ d1ursa\_ d1h3da1 d1iuda\_ d4mlva1 d1twya\_ d3e13x\_ d2nxoa1  
d4pfua\_ d3ttma\_ d1elja\_ d2qmwa1 d1us5a\_ d1y3na1 d1jeta\_ d1uqwa\_  
d4f19a1 d2esna2 d3thia\_ d3fasa1 d2uyeb\_ d2xwva1 d1r91a\_ d2fyia1  
d1pb7a\_ d2ozza1 d1sw5a\_ d1nh8a1 d1vr5a1 d2g29a\_ d1xs5a\_ d3lswa\_  
d2z23a\_ d3w9va\_ d3tcha\_ d1q35a\_ d1z7me1 d3q27a\_ d1p99a\_ d1ve4a1  
d2i6ea1 d4mcoa1 d4n8ya\_ d1eu8a\_ d1zbma1 d1hsla\_ d1lixca2 d1j1na\_  
d1xvya\_ d1y9ua\_ d2z22a1 d1xoca1 d4oera\_ d1wdna\_ d5f1qa1 d1xt8a1  
d1i6aa\_ d4gwoa\_ d4igta1 d1pc3a\_ d4mmpa1 d2czla1 d2onsa2 d4mija1  
d4ok5a1 d2bmfa1 d2bmfa2 d1yksa1 d1yksa2 d1jr6a\_ d2qeqa1 d2j1qa1

d1a1va2 d1eh3a\_ d3skpa\_ d1dtza1 d1dtza2 d1ieja\_ d1jnfa2 d1ce2a1  
d1jnfa1 d1b1xa2 d1b1xa1 d1jw1a1 d1ryoa\_ d1h76a1 d1h76a2 d1c4oa1  
d2p6ra3 d2p6ra4 d1oywa2 d1oywa3 d1wrba1 d1w36b2 d1w36b1 d1c4oa2  
d3bora\_ d1t6na\_ d2eyqa5 d2eyqa3 d2eyqa2 d2zu6a2 d1veca\_ d1uaaa1  
d1w36d1 d2g9na1 d1z3ix2 d2rb4a\_ d1hv8a1 d1hv8a2 d1t5ia\_ d1w36c2  
d2j0sa2 d2j0sa1 d1fuka\_ d3hjha1 d1z5za1 d1qdea\_ d1z63a1 d1s2ma2  
d1s2ma1 d1wp9a1 d1wp9a2 d1gm5a3 d1gm5a4 d3dina4 d3dina3 d1q0ua\_  
d1w36c1 d1z3ix1 d1nкта3 d1uaaa2 d1w36d2 g1qhh.1 d2fwra2 d2fwra1  
d3q3ma\_ d1za0a1 d1mxra\_ d2inca\_ d1jk0a\_ d2incb\_ d1mhyb\_ d3hf1b\_  
d1mtyb\_ d1r2fa\_ d2uw1a\_ d1mhyd\_ d3n37a\_ d1afra\_ d1oquc\_ d1syya\_  
d1mtyd\_ d2o1za\_ d1uzra\_ d1smsa\_ d2fkza\_ d1zuja1 d1s3qa1 d2fjca1  
d1z6om1 d1veia\_ d4dyya\_ d1jiga\_ d3gvya\_ d2pyba\_ d4cy9a1 d3bvfa1  
d1r03a\_ d2cf7a\_ d1nf4a\_ d1zs3a1 d4iwka\_ d3ka8a\_ d3np0x\_ d1n1qa\_  
d11b3a\_ d4e6ka\_ d1z6oa1 d2fzfa1 d4dyua\_ d3ge4a\_ d1jgca\_ d4am4a\_  
d2z6ma\_ d1ji5a\_ d1vlga\_ d1krqa\_ d3qz3a\_ d1o9ra\_ d2ffxj\_ d1euma\_  
d1yv1a1 d2v2pa\_ d1j30a\_ d4di0a\_ d1dpsa\_ d1oewa\_ d2qzxa\_ d2asia\_  
d1psoe\_ d1miqa\_ d1smra\_ d2h6ta\_ d1pfza\_ d1izda\_ d3hd8a\_ d1j71a\_  
d1dpja\_ d4aa9a\_ d1t6ex\_ g1b5f.1 g1lya.1 g1htr.1 d1qdma2 d1bxoa\_  
d1wkra\_ d1tzsa\_ d1libqa\_ d2qzwa\_ d1bdqa\_ d3ggta\_ d3ixoa\_ d1mrxa\_  
d2haha\_ d1tw7a\_ d4njsa\_ d1sgua\_ d2p3da\_ d1nsoa\_ d3d3ta\_ d2rkfa\_  
d1c6ya\_ d2rspa\_ d3ogpa\_ d3ekwa\_ d2o4na\_ d2j9ja\_ d1baia\_ d3ggua\_  
d3lzua\_ d4npua\_ d4j55a\_ d2r8na\_ d2fxda\_ d2p3ca\_ d4dgea\_ d3ttpa\_  
d3t3ca\_ d2p3aa\_ d2hc0a\_ d2fdda\_ d3mwsa\_ d1k8rb\_ d1wgra1 d1ef5a\_  
d1wfyal d1e8ya3 d1wgya1 d2cs4a1 d1wxma1 d2byea1 d3kh0a1 d2byfa1  
d1wxaa1 d1e7ua3 d4yl8a1 d2a16a3 d1l17ya\_ d1wgda1 d1wggal d4q5eb\_  
d1wjna1 d1se9a\_ d3n3kb\_ d1wz0a1 d1we6a1 d2m0xa\_ d2gbka\_ d3rt3b1  
d1wh3a1 d1sifa\_ d2ekek2 d4ii2b1 d4hk2a1 d1c3ta\_ d1m94a\_ d1wgha1  
d1ttna1 d1wx8a1 d3v6cb1 d2ma9b\_ d4i61b1 d1bt0a\_ d2jvca1 d1iyfa\_  
d2k1fa\_ d1wxva1 d1wf9a1 d1t0ya\_ d2io0b2 d1x1ma1 d2gbma\_ d1zw7a1  
d2m17a\_ d1ud7a\_ d1we7a1 d2lwpal d2gbja\_ d1wjua1 d1v6ea1 d1v86a1  
d4eewa\_ d1wiall d4icva\_ d4gu2a\_ d1wx7a1 d1wy8a1 d4hjka1 d2faza1  
d1v5oa1 d2a13a1 d2cr5a1 d1wj4a1 d1s3sg\_ d1g66a\_ d1qoza\_ d5ajha1  
d3h33a\_ d1rwja\_ d19hca\_ d1os6a\_ d3bxua\_ d3h4na\_ d1i77a\_ d3caoa\_  
d1j0pa\_ d2ctha\_ d1ofwa\_ d2e84a\_ d1hh5a\_ d1gyoa\_ d3h34a\_ d1s5ja1  
d2hbja2 d2igia\_ d1wlja\_ d1qhta1 d4dlea1 d1tgoa1 d2f96a1 d3tr8a1  
d3mxma\_ d1q8ial d1y97a1 d1w0ha\_ d1kfsa1 d2py5a1 d1noya\_ d1d5aa1  
d1yt3a3 d2guia\_ d3mwpa1 d4kb1a\_ d1wioa4 d1ccza2 d1dr9a2 d1lic1a1  
d2d9qb1 d2nxyb2 d1um8a\_ d1lixza\_ d1qvra2 d1qvra3 d1qzma\_ d1sxjc2  
d1jr3d2 d2p65a\_ d118qa2 d3hu3a3 d1sxjd2 d1njfa\_ d1in4a2 d1sxja2  
d1tuea1 d2ce7a2 d1w5sa2 d1sxjb2 d1d2na\_ d1ny5a2 d1ofha\_ d2gnoa2  
d2a5yb3 d1fnna2 d1u0ja1 d1lv7a\_ d1iqpa2 d2fnna2 d1lixsb2 d4gita\_  
d1sxje2 d1g41a\_ d21j7a\_ d1n4na\_ d2m8bb1 d2kyqa\_ d3psma\_ d1jxca\_  
d2g11a\_ d1ugla\_ d4uj0a\_ d2k4ua\_ d1hp2a\_ d2lu9a\_ d1baha\_ d2meoa1  
d1wm7a\_ d1hlya\_ d1n8ma\_ d1jlza\_ d1wpda\_ d1c55a\_ d1pvza\_ d1wt7a\_

d1rjia\_ d1wz5a\_ d1m2sa\_ d1pjva\_ d1c49a\_ d1qkya\_ d2ktca1 d1wmta\_  
d1du9a\_ d1j5ja\_ d1rlga\_ d1t0za\_ d2i6la\_ d1t1ta\_ d1sn4a\_ d1kv0a\_  
d21kba\_ d1npia\_ d1wwna\_ d1pe4a\_ d2kbka\_ d2li7a\_ d1djta\_ d2kbha\_  
d1dq7a\_ d1sega\_ d1omya\_ d1zywa1 d1jzaa\_ d1bnla\_ d1t61c1 d1iyjb4  
d1iyjb5 d1iyjb3 d1o7ia\_ d4ipca1 d1x3ea\_ d4apva\_ d1jb7a1 d1jb7a2  
d1jb7a3 d3kdfa\_ d1ue1b\_ d1wjja1 d3eiva\_ d1xjva2 d1xjva1 d2ccza2  
d1se8a\_ d1l1oc\_ d1jb7b\_ d1qvca\_ d3ulla\_ d1qzga\_ d1miua4 d1miua5  
d1miua3 d3g48a1 d1gd7a\_ d1mkha\_ d1jjcb3 d1pyba\_ d3ubub\_ d1egia\_  
d1qo3c\_ d1v7pa\_ d1tdqb\_ d3ubua\_ d1c3ab\_ d1h8ua\_ d3bx4b\_ d1t8ca1  
d1sb2a1 d1qdda\_ d2ziba1 d3cada\_ d1byfa\_ d1j34b\_ d1jwia\_ d1jzna\_  
d1c3aa\_ d1oz7b\_ d1wmza\_ d3bdwb\_ d1hq8a\_ d1fifa1 d1dv8a\_ d3hupa\_  
d1wk1a1 d1umra\_ d2afpa\_ d3bx4a\_ d1gz2a\_ d1sl6a\_ d1v7pb\_ d3g8ka\_  
d1ixxa\_ d1j34a\_ d1jwib\_ d1g1sa1 d1y17a1 d1ja3a\_ d1fvub\_ d3bdwa\_  
d1sb2b1 d1fvua\_ d1umrc\_ d1oz7a\_ d4m17a\_ d3cfwa1 d1ypqa1 d1g1ta1  
d3fd4a\_ d3l9jc\_ d4dn8a1 d1v41b\_ d1rd11\_ d2msba\_ d1dgsa2 d1ckma1  
d1p16a1 d1x9na2 d1pfsa\_ d2a1ka\_ d1rpma\_ d2shpa1 d1yfoa\_ d1l8ka\_  
d2ooqa1 d1g4us2 d1p15a\_ d1lara2 d1lara1 d1wcha\_ d2fh7a2 d2fh7a1  
d1ohea1 d1ohea2 d2f4da\_ d1rxda\_ d2hxpa\_ d1xria\_ d1fpza\_ d3ezza\_  
d4y2ea\_ d1i9sa\_ d4alac\_ d1pjwa\_ d1s6na\_ d3uzqb\_ d3azya\_ d3wvja\_  
d1upsa1 d1ajoa\_ d2hyka\_ d1ajka\_ d2vy0a\_ d1o4ya\_ d3o5sa\_ d3d6ea\_  
d3atga\_ d1dypa\_ d1umza\_ d3i4ia\_ d1c1la\_ d4lbqa\_ d1a78a\_ d1slta\_  
d4no4a\_ d3zsja\_ d3duia\_ d1is3a\_ d1qmja\_ d1hlca\_ d1tdha3 d1q3ba3  
d1ee8a3 d1k82a3 g1qmo.1 g1len.1 d3zyra\_ d1fnya\_ d1n47a\_ g2ltn.1  
d1avba\_ d3usua\_ d1dhkb\_ d1f9ka\_ d1ukga\_ d1g8wa\_ d1g9fa\_ d1wbfa\_  
d3wcsa\_ d1g7ya\_ g1loe.1 d1mvqa\_ d1hq1a\_ d1v6ia\_ d1dbna\_ d1qnwa\_  
d1fx5a\_ d4l8qa\_ d1ioaa\_ d3n35a\_ d3ubra\_ d1qo8a1 d1d4ca1 d2k3va\_  
d1ft5a\_ d1qdba\_ d1m1qa\_ d2j7aa\_ d1h21a\_ d1ogyb\_ d4fasa\_ d1jnia\_  
d1oaha\_ d1sp3a\_ d2h0ba\_ d2erfa\_ d1h30a2 d1h30a1 d3mw4a1 d1pz7a\_  
d2r1ba\_ d3v64a1 d1d2sa\_ d3bopa1 d3mw3a1 d1okqa1 d1okqa2 d1dszb\_  
d1a6ya\_ d3cbba\_ d1ynwa1 d1r4ia\_ d1hcqa\_ d2hana\_ d2hanb\_ d2enva1  
d1kb4b\_ d2n11b\_ d1lola\_ d1cita\_ d1adqa1 d1fnga1 d1uvqb1 d1zs8a1  
d2vola1 d2vola2 d1mfb12 d2jelh2 d1uwel2 d3qq4b1 d1kjob\_ d1k5na1  
d1osph2 d4odh12 d1ow0a1 d1ow0a2 d1bfob2 d3l9ra2 d3jtt1 d2fath2  
d4elkb2 d1fn4b2 d2xfxb\_ d1pg7x2 d1cqka\_ d4k71b2 d1l1k2a1 d1leapb2  
d4lfhg2 d1i4fa1 d2nw2a2 d1kfah2 d1mhca1 d1h3ua1 d1wejh2 d1h0db2  
d1a5fh2 d1kcvh2 d1mjuh2 d1qqda1 d1kcrh2 d1k8ia1 d3huja2 d2nnab1  
d1nfd2 d3mffb2 d1s9va1 d1l1k3h2 d1q0x12 d1fv1b1 d1neza1 d4rfeb2  
d1r3ha1 d1a6tb2 d1kjva1 d1pz5b2 d1onqa1 d2bc4a2 d1de4a1 d1k8da1  
d1tcra2 d1dn0b2 d1nfde2 d2xwtb2 d1bfoa2 d1mexh2 d1iakb1 d1ypzf2  
d4f7ea2 d1q72l2 d2fbjh2 d1fe8h2 d1clzh2 d1fngb1 d1uvqa1 d1vgka1  
d1c16a1 d4j12a2 d4x99b2 d1igtb3 d1je6a1 d1q72h2 d1nldh2 d1teth2  
d2hmic2 d1ilca2 d1ilca1 d1k8ib1 d1q0yh2 d1kfa12 d3frua1 d1pg7w2  
d1u58a1 d1igyb4 d1igyb3 d1hyrc1 d1klub1 d1deeb2 d1c12b2 d2bc4b2  
d2ig2h2 d1kcvl2 d3wn5b1 d1l1k2b\_ d1l1k3l2 d1mjul2 d1sm3h2 d1q0xh2

d1zvsa1 d1ydpal d1u8ib2 d1ypze2 d1op9a\_ d1y0la1 d1letzb1 d1egj11  
d2gsib1 d1nj9a1 d4jfhdl d1aqkl1 d1t2ja\_ d1lo4h1 d1zvya1 d3v4vl1  
d4enec1 d1kxtb\_ d5e8ea1 d2pxya\_ d4weud\_ d1xiwc\_ d2esvd1 d1qznh\_  
d1ogae1 d1f4xh1 d4n1hb\_ d3ezjb1 d3mlwl1 d1kfah1 d1letza1 d1b4jh1  
d3cfic\_ d4w68a\_ d2arja1 d1ek3a\_ d2ok0l1 d1vera\_ d1uwgh1 d1blnb1  
d1fpth1 d1rzga1 d2giya1 d4m3kb1 d1nc2a1 d2nyyd1 d1ncna\_ d1fbih1  
d5dxwa\_ d4fqqa1 d1dqdh1 d1jfq11 d1kelh1 d1faih1 d1frgl1 d1figl1  
d4m6n11 d1fo0a\_ d4hxb11 d3b5ga\_ d3quyd1 d2h9gb1 d1i8kb\_ d2dd8h1  
d2ck0h1 d1eaja\_ d4w6wb1 d2a6ib3 d1t66d1 d2e27h\_ d1ob1b1 d1f11b1  
d2v7na1 d1ad0a1 d2xt1b1 d1pskh1 d4i13b1 d2op4l1 d1a0ql1 d1luwel1  
d1za3a1 d1ncb11 d4uu9a\_ d1bm3h1 d1cloh1 d1nqba2 d1cf8h1 d4y5va\_  
d1mhph1 d5anma1 d4cdgc1 d4ldeb\_ d1y0lb1 d2pcpb1 d1z3gl1 d1dfb11  
d1fh5h1 d3g5xa1 d1tzib1 d4dn3l1 d3zhka1 d2b1hh1 d2uylal d1f3dh1  
d1nj9b1 d2agjh1 d2h1pl1 d1q72h1 d8fabbb1 d1ndmb1 d1rjca1 d4u6hb1  
d3upca\_ d2fbj11 d1osph1 d1tvda\_ d2cjev\_ d4fhbd1 d1bd2d1 d1rz7h1  
d3nn8a\_ d1knoa1 d1nfdal d2bmkb1 d1dq11\_ d1igyb1 d1igfl1 d12e8h1  
d3utza1 d1nc2b1 d1rihh1 d4mwfb1 d4jvpa1 d1mieh1 d1rhfa1 d1fgn11  
d1sbsh1 d1lp9e1 d1dn0a1 d4lqfl1 d1iaih1 d1kgcd1 d1mh5b1 d1gpol1  
d2g60h3 d1f8t11 d2jixd1 d4grwh\_ d1fo0b\_ d1bfob1 d1axsa1 d1u9ka\_  
d1nmbh\_ d1h8na1 d1h8na2 d1jguh1 d4eura1 d3sdy11 d35c8h1 d1w72l1  
d1mvub\_ d1i9rh1 d1ob1a1 d4wenb\_ d1yeeh1 d3ietc1 d1f58h1 d1ad0b1  
d1mqk1\_ d1nbvh1 d4b50a\_ d3r8bb\_ d1baf11 d1mamh1 d4rgne1 d2gsgb\_  
d35c8l1 d1bafh1 d1ai1h1 d2pcpa1 d2fath1 d2x1pa\_ d1orsb1 d1ibgl1  
d1shma\_ d1a2yb\_ d1u0qa\_ d2coqa\_ d1hilb1 d1qfwi\_ d1jv5b\_ d1fn4b1  
d5e0qa\_ d1nsnh1 d1plgl1 d4ocxl1 d1kb5h1 d1rzfh1 d1pg7x1 d2fx7h1  
d2oi9c\_ d1l7i11 d3eyva1 d1d5i11 d4ffyl\_ d1tet11 d1a6wh\_ d1ac6a\_  
d3dvfa\_ d1nfde1 d1mimh1 d1ri8a1 d1jhlh\_ d3dura\_ d1fskb1 d1f97a1  
d3so3b1 d2ak4d1 d1lp9f1 d4z7wf1 d1l7th1 d4y5ya\_ d4x7ec1 d1emth1  
d1ikfl1 d1nlbh1 d4utal1 d1bjma1 d1eapb1 d1u6ah1 d2dtgd1 d1kj2b\_  
d1xeda1 d1cleh1 d1fgvh\_ d2bnub1 d2fb4h1 d2dtgb1 d1ktrh\_ d1jpth1  
d1qkz11 d4hepg\_ d2atpb1 d1flrh1 d2hrpl1 d1mvfa\_ d1iaim1 d3k80a1  
d2jb5h1 d3zkxc\_ d4grwe\_ d1it9h1 d1rhhb1 d3w9ec\_ d1e4wh1 d1sy6h1  
d2j6eh1 d3qxta\_ d1jglh1 d1p7ka1 d1tzhb1 d4n8pa1 d1gaf11 d2jelh1  
d1wioa2 d4i0cc1 d1cicb1 d1lmka2 d1lmka1 d1iqwh1 d1lorqb1 d1ejoh1  
d1jnlh1 d4zglal d43c9b\_ d1ggbl1 d1wejh1 d3q6fa1 d1f3dj1 d3c6la1  
d1bqlh1 d3p9wb\_ d1a3r11 d1h0db1 d2uzil\_ d1eo8l1 d1qfwl\_ d1n7ml1  
d1igja1 d1c5ch1 d2a9mh\_ d1rmfh1 d1fj1b1 d4heme\_ d1ccza1 d1a5fh1  
d1ogad1 d1dlfh\_ d1qa9b\_ d1vge11 d3qskb\_ d1sjxa\_ d4ozfg1 d1sq2n\_  
d1qd0a\_ d1kcvh1 d1c5db1 d3qcull d8faba1 d3bn9d1 d1mjuh1 d4y8dc\_  
d7fabh1 d3dvgb1 d1lo0l1 d1a6tb1 d1gigh1 d1kcrh1 d2hwh11 d1yjdc1  
d3clfl1 d4krna\_ d1d17l\_ d1e6ol1 d1mexh1 d3r0ma\_ d4kkna\_ d1fns11  
d1loaqh\_ d1rzial d1ucbh1 d1ncwl1 d4b41a\_ d1nfdfl d2mpah1 d2d7tl1  
d4grwf\_ d4b5ea\_ d1lk3h1 d3u79a\_ d4u3xa\_ d1ghfl1 d1bvkb\_ d1mcww1  
d1b88a\_ d1jrhh1 d32c2b1 d4wemb\_ d1dsfh\_ d1op3h1 d1cell1 d1iqdal

d1qoka1 d1qoka2 d1qfuh1 d2crya1 d1lay1h1 d1loaql\_ d3ab0b\_ d1rur11  
d1t4kb1 d1bz7b1 d1n0xh1 d1for11 d1lucb11 d4w6yb\_ d43c9a\_ d2aab11  
d1tzia1 d4n1ca\_ d1k6qh1 d3g9ab\_ d4tvsa1 d1igmh\_ d1pz5b1 d3dx9a1  
d3wxwh\_ d1nakh1 d1kcul1 d3eaka\_ d4qlra1 d1cr911 d1d9ka\_ d1f4x11  
d1deea1 d2i27n2 d1c12a1 d2orb11 d1j8hd1 d1mcph1 d1c5da1 d1kenh1  
d1bd2e1 d1h5ba\_ d4x7fc1 d3upaa\_ d1t3fa1 d1indh1 d2dtgc1 d4hc111  
d1zv5a1 d4wgvb\_ d1uwgl1 d4f37k1 d1aqkh1 d1vesa\_ d3zkqd\_ d1fpt11  
d1lo4l1 d1knob1 d3rrqa\_ d1ct8b1 d4orz\_ d1mlbb1 d4hgkc1 d1dqdl1  
d1bogb1 d4ozhe1 d1dr9a1 d1i7za1 d1dn0b1 d1kell1 d1rrib1 d1ypzf1  
d1wtla\_ d1hkfa\_ d1fail1 d1figh1 d2vyre\_ d1sjva\_ d1ohqa\_ d1bfoa1  
d1pkqb1 d1mjul1 d1b4j11 d1nsl1 d2arjb1 d1p4bh\_ d4aj0a\_ d3nn8b\_  
d2rcja1 d1f2xk\_ d4v1dd\_ d1adqh1 d2eksa\_ d4k3ga\_ d1jfqh1 d1uweh1  
d1frgh1 d4gftb\_ d1uz8b1 d4n1ea\_ d1bm311 d1clol1 d3mcka1 d2vq1a1  
d1ae6h1 d4aq1b1 d1uj3b1 d1nbqa1 d1fh511 d2ck011 d2ywza\_ d1q7211  
d4nxbx\_ d1hila1 d4hz1b1 d2j8811 d1zmya1 d1cd0a\_ d1a4ka1 d1psk11  
d1a0qh1 d4krmb\_ d1ncbh1 d2fbjh1 d1j8he1 d1i3ua\_ d1cf811 d1fe8h1  
d2plya1 d1eeqa\_ d2x89a\_ d1ol0a\_ d2r01h1 d1ub5a1 d1dfbh1 d3eyvb1  
d4jdvb1 d4p2cg\_ d2gsia1 d2agj11 d1u3ha1 d2h1ph1 d1rih11 d1fskc1  
d1boga1 d2a7711 d1osp11 d1qfoa\_ d3dwta\_ d2fx711 d1rz711 d3stba1  
d1pkqa1 d1b6da1 d1dzba2 d1dzba1 d1kj2a\_ d4l1ha\_ d1rzgb1 d1dq1h\_  
d12e811 d1miel1 d1jmaa\_ d1sbs11 d1fgnh1 d1f5811 d1mqkh\_ d1ndgb1  
d3qegl1 d1ia11 d2aw2a1 d1tqbc1 d3fo2a1 d4dkaa\_ d1f8th1 d2g6011  
d2ywy\_ d1uj3a1 d1yc7a\_ d3bd3a\_ d4w6xb1 d1nmb1\_ d1i8ka\_ d1rj1b1  
d1ypze1 d1p7kb1 d1kxqe\_ d1gpoh1 d2z4qa1 d1w72h1 d1i9r11 d4qgya1  
d4xt1c\_ d2qqnh1 d1cica1 d3c08h1 d2cd0a\_ d2bdnh1 d1hnga1 d1mam11  
d1nldh1 d1cr9h1 d4lcih1 d3bkyh1 d3qg711 d1ai111 d1kxvc\_ d4iosd\_  
d117ih1 d2x1qa\_ d1ub6b1 d3k74b\_ d1ibgh1 d1teth1 d1igya1 d1hxma1  
d2x6ma\_ d2e71a\_ d5e03a\_ d1qfwm\_ d2r0kh1 d1igjb1 d1rurh1 d1plgh1  
d1mj8h1 d1yuhb1 d3fmg11 d1rzf11 d1emt11 d1ad9b1 d1igtb1 d1nlb11  
d1d5ih1 d3k7ua\_ d4ffyh\_ d1bwwa\_ d3dvgal d1a6ta1 d1fgvl\_ d4qxgl1  
d1mim11 d1jhl1\_ d2hffb1 d2hh011 d1qkzh1 d117t11 d1afvh1 d1iaii1  
d2cjuh\_ d1um5h1 d2ghwb2 d2ghwb1 d1kgce1 d2fgwh1 d1ikfh1 d1dvfd\_  
d2i24n1 d2xtjb\_ d1za3b1 d2yc1a\_ d2hh0h1 d2x1oa\_ d1bvka\_ d1rj1a1  
d5e7ba1 d1igta1 d1il1b1 d2fb411 d1mvua\_ d1jpt11 d32c2a1 d1fvca\_  
d1iqdb1 d2hrph1 d2p4ab\_ d4qo1a\_ d1p2cb1 d1wt5c\_ d1t4ka1 d5c1mb\_  
d1it911 d1bz7a1 d1b2wh1 d1e4w11 d1jnl11 d1yedb1 d1za6b1 d3u7aa\_  
d1igfh1 d3gnm11 d1orsa1 d1wejl1 d1a2ya\_ d1hxmb1 d1gafh1 d2j4wh1  
d1pz5a1 d1j05a\_ d1a3rh1 d4fq111 d1qfwh\_ d1eo8h1 d1n7mh1 d4s11a\_  
d1kegh1 d5da4a\_ d1iqw11 d3whxb1 d1vgeh1 d1deeb1 d1c12b1 d1t2ql1  
d1ad9a1 d3gsnb1 d3b2uc1 d1ggbh1 d1t3fb1 d1nak11 d4ocmc\_ d1lila1  
d2v7hb3 d2esve1 d1mcoh1 d2qr0b1 d2q3aa\_ d1ct8a1 d1kcr11 d2pxyb\_  
d2uzih\_ d5c3ld\_ d3durb\_ d1c5c11 d2ak4e1 d1d17h\_ d1xiwd\_ d1mlba1  
d1rmfl1 d1i7zb1 d1dlf1\_ d2xa3a\_ d5bq7b1 d1dqqb1 d3h4211 d1legjh1  
d1kcv11 d1fe811 d2j6e11 d1f3rb2 d1lk311 d1sm3h1 d1q0xh1 d1ghfh1



d7fabl1 dligch1 d1lo0h1 d4idla\_ d5c2b1\_ dljrh11 dl1l1a1 d3zhda1  
d4kfzc\_ dlb0wa\_ d1e6oh1 d1mexl1 d4krpb\_ d1fnsh1 d1ncwh1 d4hgma\_  
d4eigb1 d4rzca\_ d2mpal1 d4y5xa\_ d5en2b1 d3lrga1 d4ej1c1 d1rhha1  
d1j05b\_ d1forh1 d1q9wb1 d2wzpd\_ d2aq2a1 d1h0da1 d3revb1 d2ij0c1  
d1tzha1 d4m7j11 d1k6q11 d3b9kc1 d1igml\_ d3qeua1 d1dsfl\_ d1celh1  
d1kcu1 d1zvha1 d1zvoa1 d1tqbb1 d1ay111 d2qsc11 d2cgrh1 d1n10h1  
d1ken11 d3eo0a1 d4n9ob1 d1n0xl1 d3k1kc\_ d1c4qa\_ d2wv6d\_ d1prtf\_  
d1ltrd\_ d4l63b1 d1r4pb\_ d1prtd\_ d1t10f\_ d2bosa\_ d1prtb1 d3chbd\_  
d2cqva1 d1fhga\_ d2k1ma\_ d2d12a1 d1biha3 d1biha1 d1biha4 d3qp3a1  
d1g1ca\_ d1gxea\_ d1cvsc2 d1cvsc1 d1xmwa2 d1m4ka2 d2otpa2 d1biha2  
d1rhfa2 d2fcba2 d2fcba1 d1wwbx\_ d1gsma2 d1epfa1 d1epfa2 d2dava1  
d1waaa\_ d1f97a2 d1x44a1 d1vcaa2 d1fnla2 d1fnla1 d3b5ha2 d3h8na2  
d3h8na1 d1bjba1 d1bjba2 d1pd6a\_ d1f2qa2 d1f2qa1 d3cx2a\_ d1nbqa2  
d3b5ha1 d1n26a1 d1xiwb\_ d1xaua\_ d1fltx\_ d2ifga1 d1olla1 d1olla2  
d1cs6a4 d1cs6a3 d1cs6a2 d1cs6a1 d2gw5a2 d1sy6a1 d1xiwa\_ d1lucta2  
d1lucta1 d1ry7b2 d1gl4b\_ d1qz1a3 d1olza1 d2c9aa1 d1wwca\_

**Family-24 (b.121.4.7)**

**Positive dataset contains 1 protein sequences.**

d1x36a\_

**Negative dataset contains 4032 protein sequences.**

d1m32a\_ d1libja\_ d1iuga\_ d4q75a\_ d2bkwa1 d1t3ia\_ d1n8pa\_ d1qz9a\_  
d1jf9a\_ d1eg5a\_ d1p3wa\_ d3kgwa\_ d1c11a\_ d2ctza1 d1vjoa\_ d2rfva\_  
d1gc0a\_ d1cs1a\_ d1d2fa\_ d2ch1a1 d1qgna\_ d1pffa\_ d1elua\_ d1u08a\_  
d11c5a\_ d1b5pa\_ d2ay1a\_ d1bw0a\_ d3pd6a\_ d7aata\_ d2csta\_ d1j32a\_  
d1fg7a\_ d4wlha\_ d1o4sa\_ d1v2da\_ d1gdea\_ d1m6sa\_ d1v72a1 d1svva\_  
d1ajsa\_ d1wsta1 d2f8ja2 d11k9a\_ d1vp4a1 d1xi9a1 d2gb3a1 d3rcha\_  
d3k40a\_ d1pmma\_ d1xkta1 d2hfka\_ d5d3ka\_ d2cfba1 d1o69a\_ d1bj4a\_  
d3k28a\_ d2bwpa\_ d3lg0a\_ d2fnua\_ d3ou5a\_ d1z7da1 d1b9ha\_ d1iaya\_  
d4msoa\_ d1bs0a\_ d1s0aa\_ d1sffa\_ d3tqxa\_ d1mdoa\_ d3qboa\_ d3pgya\_  
d1bjna\_ d2dkja\_ d1ejia\_ d1vefa1 d4wxga\_ d3bs8a\_ d3gbxa1 d1w23a\_  
d1sefa\_ d1sfna\_ d1rc6a\_ d3lgia\_ d3i77a\_ d2z9ia2 d4nsva\_ d1lcya2  
d4jcna\_ d1os8a\_ d1hpga\_ d1p3ca\_ d111ja\_ d1qtfa\_ d1f56a\_ d1bypa\_  
d1azca\_ d1ws8a\_ d3u25a\_ d1cuoa\_ d1id2a\_ d1rkra\_ d2iaac\_ d4dp1x\_  
d1nwpa\_ d2gima\_ d2i7sa\_ d1qhqa\_ d3ehbb1 d1gyca3 d1hfua2 d1kbva1  
d1kbva2 d1sdda1 d1sdda2 d1gyca1 d1gyca2 d1mzya1 d2bw4a1 d1aoza1  
d1aoza3 d1aoza2 d1kyaa3 d1kyaa1 d1mzya2 d4e9sa1 d1sddb1 d1sddb2  
d1hfua1 d1hfua3 d1oela2 d1oela1 d1v10a2 d1v10a3 d1v10a1 d2bema\_  
d1pama1 d1ea9c1 d1qhoa1 d2fhfa2 d2fhfa1 d1k3ia1 d1j0ha1 d1cxl1a1  
d2bhua1 d1edqa1 d1f1sa2 d1ut9a2 d1gvia1 d1txka1 d1adqa1 d1fnga1  
d1uvqb1 d1zs8a1 d2vola1 d2vola2 d1mfb12 d2jelh2 d1uwel2 d3qq4b1  
d1kjob\_ d1k5na1 d1osph2 d4odh12 d1ow0a1 d1ow0a2 d1bfob2 d3l9ra2  
d3jtth1 d2fath2 d4elkb2 d1fn4b2 d2xfxb\_ d1pg7x2 d1cqka\_ d4k71b2  
d11k2a1 d1eapb2 d4lfhg2 d1i4fa1 d2nw2a2 d1kfah2 d1mhca1 d1h3ua1  
d1wejh2 d1h0db2 d1a5fh2 d1kcvh2 d1mjuh2 d1qqda1 d1kcrh2 d1k8ia1

d3huja2 d2nnab1 d1nfd2 d3mffb2 d1s9va1 d11k3h2 d1q0xl2 d1fv1b1  
d1neza1 d4rfeb2 d1r3ha1 d1a6tb2 d1kjva1 d1pz5b2 d1longa1 d2bc4a2  
d1de4a1 d1k8da1 d1tcra2 d1dn0b2 d1nfd2 d2xwtb2 d1bfoa2 d1mexh2  
d1iakb1 d1ypzf2 d4f7ea2 d1q72l2 d2fbjh2 d1fe8h2 d1clzh2 d1fngb1  
d1uvqa1 d1vgka1 d1c16a1 d4j12a2 d4x99b2 d1igtb3 d1je6a1 d1q72h2  
d1nldh2 d1teth2 d2hmic2 d1l1ca2 d1l1ca1 d1k8ib1 d1q0yh2 d1kfa12  
d3frua1 d1pg7w2 d1u58a1 d1igyb4 d1igyb3 d1hyrc1 d1klub1 d1deeb2  
d1c12b2 d2bc4b2 d2ig2h2 d1kcvl2 d3wn5b1 d11k2b\_ d11k3l2 d1mjul2  
d1sm3h2 d1q0xh2 d1zvsal d1ydpal d1u8ib2 d1ypze2 d1kcuh2 d2phla2  
d2phla1 d1fxza2 d1fxza1 d1uija1 g1dgw.1 d2v09a\_ d1uika2 d1uika1  
d1dgwa\_ d1ep0a\_ d2pa7a1 d1wlta1 d1nxma\_ d2c0za1 d1ds6b\_ d1fstb\_  
d1tafa\_ d1bh9b\_ d1tafb\_ d1jfib\_ d1q9ca\_ d1h3ob\_ d2byka1 d1n1ja\_  
d4g92b\_ d1jfia\_ d1h3oa\_ d2bykb1 d1n1jb\_ d1h32a1 d2bjca1 d2hsga1  
d1qpza1 d1efaa1 d1h4ba\_ d2opoa\_ d1r0ka3 d1vkoa2 d1vm6a2 d3qvsal2  
d1gr0a2 d1p1ja2 d2ovga\_ d1sq8a\_ d1rzsa\_ d3kz3a\_ d3orca\_ d3gpdg2  
d2q49a2 d1hdgo2 d2g17a2 d2cvoa2 d2czca1 d3pwka2 d1obfo2 d1zyao2  
d2pkqo2 d1b7go2 d2hjsa2 d1cf2o2 d1vkna2 d1nvm2 d1ux8a\_ d1dlya\_  
d4i0va\_ d2bkma\_ d1dlwa\_ d2bmma\_ d2msya\_ d2djoa1 d2r5za\_ d1au7a1  
d1f43a\_ d2lmda1 d1akhb\_ d1s7ea1 d3nara\_ d1zq3p1 d2craa1 d1mija\_  
d4uuta\_ d3a01a\_ d1x58a1 d3rkqa1 d3cmya1 d2cqa1 d2da6a1 d1e3oc1  
d1fjla\_ d1mh3a1 d1x41a1 d1wh7a1 d1gt0c1 d2mw8a\_ d1lfup\_ d1x2ma1  
d1b72a\_ d1wi3a1 d1jgga\_ d1wjha1 d1x2na1 d1nmnc\_ d2cuea1 d3k2aa\_  
d2hosa\_ d2jwta2 d1pufa\_ d1oact1 d2hi3a\_ d1b8ia\_ d4j19a\_ d3lnqa\_  
d1wh5a1 d1b8ib\_ d1hcra\_ d1tc3c\_ d1gdtal d1u78a2 d6paxa1 d1k78a1  
d1k78a2 d1b10a1 d1b10a2 d1d5ya1 d1prtc2 d1prtb2 d3lv8a\_ d1s3ga1  
d1s4qa\_ d3tvta2 d1uf9a\_ d1khta\_ d1ckea\_ d1osna\_ d1p5zb\_ d4tmka\_  
d3cm0a\_ d1tmka\_ d1jaga\_ d3h86a\_ d1t0hb\_ d1nn5a\_ d2h92a\_ d3kb2a1  
d2c95a1 d1yj5a2 d1kgda\_ d1ly1a\_ d2ak3a1 d1vyva2 d1deka\_ d2grja1  
d1p3ja1 d1y63a\_ d1e4ya1 d1s96a\_ d3iija1 d1lvga\_ d1nksa\_ d1vyua2  
d4e22a\_ d1qf9a\_ d1jjva\_ d1q3ta\_ d1ki9a\_ d1lw7a2 d1teva\_ d1kjwa2  
d1gsia\_ d1g3ma\_ d1t8ta1 d1nsta\_ d1fmja\_ d1zrha\_ d1ls6a\_ d2a3ra\_  
d1aqua\_ d2zptx\_ d3ckla\_ d1texa\_ d1q44a\_ d2gwha\_ d1z0ja1 d3umra2  
d3gj0a1 d2gaoa1 d1yzga1 d1x3sa1 d1g7sa4 d1puja\_ d1udxa2 d1kk1a3  
d2o52a\_ d1jwyb\_ d1zcaa2 d1zcba2 d2fv8a1 d2cjwa\_ d3dz8a1 d1xzpa2  
d1vg8a\_ d4qxaa\_ d2ew1a1 d1x1ra1 d2bcgy\_ d3doea1 d3cona\_ d3rega\_  
d3wyga\_ d1upta\_ d2b6ha1 d1zd9a1 d1lnza2 d1r5ba3 d1n0ua2 d1r2qa\_  
d2f91a1 d2rhda\_ d3q3jb\_ d3q85a\_ d1efma1 d1r8qa\_ d2gf9a1 d2akab1  
d1ek0a\_ d1z08a1 d2gcoa1 d2dy1a2 d4g01b\_ d2cxa1 d1svia\_ d3q72a\_  
d1ni3a1 d4ac9a4 d2erxa1 d2bmea\_ d1wxqa1 d2gf0a1 d4ldja1 d1zunb3  
d1d5ca\_ d4lv5b\_ d1efca3 d1kmqa\_ d2g6ba1 d3lrpa\_ d1tada2 d2y8ea\_  
d4rd4a1 d1z06a1 d2heia\_ d3a58b\_ d1u01a2 d1d2ea3 d1zj6a1 d2ocba\_  
d3rwoa\_ d1mr3f\_ d2e9sa1 d4u5xa1 d2iwra\_ d2fn4a1 d3bwdd\_ d2nzja1  
d2atva1 d2ksqa\_ d3l43a\_ d1mkya2 d1mkya1 d1wmsa\_ d1jnja3 d2rmka\_  
d1f6ba\_ d1f60a3 d1gota2 d1jala1 d2fh5b1 d1g16a\_ d2wblc\_ d1m7ba\_

d1wf3a1 d1f5na2 d1t9ha2 d1z6xa1 d1z0aa1 d2fg5a1 d2a5ja1 d2bcjq2  
d1s0ua3 d1ky3a\_ d4y0va\_ d4lhwa\_ d2qmea1 d2atxa1 dlegaa1 d1ryha\_  
d1moza\_ d1nrjb\_ d2erya1 d3bfka\_ d1puia\_ d1fzqa\_ d3j3az1 d3t5ga\_  
d1shza2 d3defa\_ d2f7sa1 d3raba\_ d3tsoa\_ d3aq4a\_ d2a17a1 d3sfva1  
d3bc1a\_ d2ncda\_ d1sdma\_ d3h4sa1 d2heha\_ d2grya\_ g3kin.1 d1kk8a2  
d1br2a2 d1f9va\_ d2mysa2 d1lkxa\_ d3t0qa\_ d4db1a1 d3gbja\_ d1ry6a\_  
d1v8ka\_ d1k8ka2 d1k8ka1 d3uleb1 d3i33a2 d3i33a1 d1dkgd2 d1dkgd1  
d4ci6a2 d1jcfa1 d4a2ba2 d2fxua1 d1yaga2 d1yaga1 d4cbua2 d1bupa2  
d1g99a2 d2e1za2 d2e1za1 d1saza1 d1saza2 d1iqca2 d1iqca1 d1eb7a2  
d1eb7a1 d1nmla1 d1nira1 d1qksa1 d2d0oa3 d2d0oa2 d1nbwa3 d1hroa\_  
d4gedb\_ d3zooa\_ d1mz4a\_ d1gu2a\_ d1f1fa\_ d1dvva\_ d1c6ra\_ d1c75a\_  
d1e29a\_ d1gdva\_ d1cnoa\_ d1h32b\_ d1co6a\_ d2bh4x\_ d2aiua\_ d5cytr\_  
d1jdl\_a\_ d1i8oa\_ d2zboa\_ d3dmia\_ d1ls9a\_ d1wvec\_ d2yk3a\_ d3ph2b\_  
d1dw0a\_ d5aura\_ d1ql3a\_ d1qn2a\_ d1f1ca\_ d4zzva\_ d2xspa\_ d4v20a\_  
d1ojja\_ d4ipma1 d1gpia\_ d4csia\_ d3pfza\_ d3ovwa\_ d2yoka\_ d2nqya\_  
d1h4ga\_ d1hixa\_ d1oa2a\_ d1olra\_ d3b7ma\_ d4h7ma1 d3wp3a\_ d2vgda\_  
d1lgoa\_ d3zsea\_ d2nlra\_ d3wx5a\_ d1oa3a\_ d1pvxa\_ d1m4wa\_ d1f5ja\_  
d1oa4a\_ d1ks5a\_ d4ixla1 d1evsa\_ d1cnt1\_ d1pvhb\_ d1z7ca\_ d1huwa\_  
d1bgea\_ d1rhga\_ d1f6fa\_ d1f45b\_ d1i1rb\_ d4x51a\_ d1d9ca\_ d4ypgc1  
d3oq3a\_ d1lqsl\_ d1n1fa\_ d1aula\_ d1wu3i\_ d3bes1\_ d3ux9a\_ d1v8fa\_  
d2ejca\_ d3muea1 d3q12a1 d4dnxa2 d1v47a2 d1g8fa2 d1jhda2 d1x6va2  
d3rbaa\_ d2qtra\_ d1nupa\_ d3l92a\_ d1qjca\_ d2h29a\_ d1vlha\_ d1od6a\_  
d1lw7a1 d1mrza2 d4ruka\_ d3sw2a\_ d1moxc\_ d1dx5i3 d1edmb\_ d1autl2  
d1autl1 d1nqlb\_ d1dval1 d1szba2 d1kigl\_ d2y5fl\_ d1ijqa2 d1gk5a\_  
d1g1sa2 d1nt0a3 d1xdtr\_ d1lmja2 d1lmja1 d1nzia2 d2wphe\_ d1klil\_  
d1pfxl2 d1pfxl1 d1p9ja\_ d1g1ta2 d1f7ea\_ d4yzub\_ d2mgpa1 d1b9wa1  
d2mgpa2 d1ob1c1 d1ob1c2 d1n1ia2 d1n1ia1 d2npra2 d2npra1 d1qx2a\_  
d1ig5a\_ d2y5ia\_ d1qlsa\_ d1psra\_ d3n22a\_ d2egda\_ d4ggfc\_ d2wcea\_  
d2luca\_ d4aqia\_ d3nsia\_ d2lp3a\_ d1j55a\_ d1a4pa\_ d1nsha\_ d1pvaa\_  
d3fs7a\_ d2pvba\_ d1ttxa\_ d1rwya\_ d2kyfa\_ d1rk9a\_ d1a75a\_ d1exra\_  
d1tizal d1nyaa\_ d1g8ia\_ d1ggwa\_ d1wdcc\_ d3fwba\_ d1ggza\_ d2o5ga\_  
d1ctaa\_ d1m45a\_ d3i5gc\_ d1sl8a\_ d1fpwa\_ d2scpa\_ d2roaa\_ d4aqra\_  
d3pn7b\_ d1br1b\_ d2mysb\_ d1s6ca\_ d1bjfa\_ d2obha\_ d1jfka\_ d1jf0a\_  
d1qv0a\_ d1lkja\_ d2mlfc\_ d2m97a\_ d2d8na\_ d4by5a\_ d1jbaa\_ d4nqga\_  
d1wdcb\_ d2mysc\_ d1j7qa\_ d1s6ia\_ d1uhka2 d1r2ua\_ d1dtla\_ d3kf9a\_  
d3pn7c\_ d1qjta\_ d1fi6a\_ d1c07a\_ d5d67d\_ d1tuza\_ d1h8ba\_ d1leg3a1  
d1leg3a2 d2zkmx1 d1snla\_ d1gjya\_ d1y1xa\_ d1hqva\_ d1dvia\_ d1df0a1  
d1qxp\_a2 d4usla\_ d1k94a\_ d1wkya2 d1uuqa\_ d3wh9a\_ d4mlra\_ d1xyza\_  
d4xuya\_ d2je8a5 d4bf7a1 d3cuia\_ d1ur4a\_ d1qw9a2 d1odza\_ d2vzsa5  
d1bqca\_ d2x2ya1 d1hjqa\_ d1qnra\_ d4y7ea1 d1vjza\_ d4k68a\_ d2v3ga\_  
d4hpga\_ d1nofa2 d1nq6a\_ d1h4pa\_ d1aq0a\_ d3ziza\_ d4bs0a\_ d1ecea\_  
d1h1na\_ d1ta3b\_ d1w91a2 d1i1wa\_ d1uhva2 d1us3a2 d1legza\_ d7a3ha\_  
d1tvna1 d3nyda1 d1ghsa\_ d2cyga1 d4xv0a\_ d2c8na2 d1w32a\_ d3emca\_  
d1v6ya1 d1foba\_ d2uwfa1 d2f gla\_ d3niya1 d2c0ha1 d1rh9a1 d1yq2a5

d1szna2 d1fa2a\_ d1pama4 d5do8a1 d1lea9c3 d1hx0a2 d2fhfa5 d1qhoa4  
d1avaa2 d1m53a2 d4m8ua1 d2gjpa2 d1lwha2 d4howa1 d1ktba2 d1j0ha3  
d3vm5a1 d2x1ia\_ d1wzaa2 d1uasa2 d2diea1 d1mxga2 d1ht6a2 d1eswa\_  
d1liv8a2 d5cpsa\_ d1lud2a2 d1zjaa1 d3gbea1 d1kwga2 d1wdpa\_ d1gcy2  
d1g5aa2 d1hvxa2 d3dhpa2 d2bhua3 d4do4a1 d3qgva1 d1e43a2 d1g94a2  
d2d3na2 d1gjwa2 d1gvia3 d1x1na1 d1r7aa2 d1tz7a1 d4toqa\_ d1wb0a1  
d1w9pa1 d1eoka\_ d1itxa1 d1kfwa1 d1goia2 d2gsja\_ d1hjxa1 d1jnda1  
d1vf8a1 d3wdpp1 d3wq5a\_ d4gxpa\_ d4hz8a\_ d1e4mm\_ d3aiua\_ d1wcca1  
d1qvba\_ d3ahxa\_ d1v02a\_ d2dgaa\_ d1pbga\_ d1vffa1 d1qoxa\_ d4ha4a\_  
d2w0pa\_ d2diaa1 d2e9ia2 d2e9ja1 d2dj4a1 d2eeba1 d2diba1 d2dmba1  
d2dmca1 d2d7oa1 d2ee6a1 d2d7pa1 d2eeaa1 d2di8a1 d1wlha1 d2d7na1  
d2nqca\_ d2d7ma1 d2dica1 d3cnka\_ d2k3ta1 d2eeca1 d1qfha2 d2bp3a1  
d1v05a\_ d2ee9a1 d2eeda1 d2di9a1 d1g4ma1 d1g4ma2 d1id1a\_ d2hmta\_  
d1offa\_ d1frfa\_ d3wcqa\_ d1e9ma\_ d1l15pa\_ d1wria\_ d1i7ha\_ d3av8a\_  
d1czpa\_ d1rfka\_ d3p1ma1 d3b2ga\_ d2bt6a2 d1wgqa1 d1v89a1 d2coda1  
d1zc3b\_ d1wg7a1 d1u5ea1 d1v61a1 d2coca1 d2ys1a1 d1v5pa1 d1ntya2  
d1wjma1 d1wil1a1 d1u29a\_ d1xx0a1 d1unqa\_ d2zkmx3 d1fhoa\_ d1v88a1  
d2adza1 d1x1fa1 d1p6sa\_ d2coaa1 d1btka\_ d1v5ma1 d1faoa\_ d2x18a\_  
d1dyna\_ d1x1ga1 d4kaxb\_ d2j59m1 d1kilb2 d1xcga2 d1txda2 d1u5da1  
d1dbha2 d1wlha\_ d1upqa\_ d1v5ua1 d1foea2 d2fjla1 d1eaza\_ d2dfka2  
d2cofa1 d1kz7a2 d1h6ua1 d9ldta1 d2ewda3 d1up7a1 d2dfda1 d1s6ya1  
d1vjta1 d7mdha1 d1hyea1 d1t2da1 d1ojsa3 d1b8pa1 d1ldna1 d1hyha1  
d1civa1 d2a92a1 d1ez4a1 d1i0za1 d1y6ja1 d1gv0a1 d1ur5a1 d1l1da1  
d1obba1 d1v8ba1 d1gdha1 d1l17da1 d2dlda1 d1mx3a1 d1ygya1 d1qp8a1  
d1li4a1 d1j4aa1 d2naca1 d1npya1 d3t4ea2 d1a4ia1 d1o0sa1 d2hk9a2  
d2egga2 d1b26a1 d1bvua1 d1gq2a1 d1c1da1 d1leha1 d1gtma1 d1euzal  
d1nvtal d3dona2 d1edza1 d1gpja2 d1vi2a1 d1p77a1 d1nyta1 d1b0aa1  
d1vl6a1 d1v9la1 d1txga2 d3f47a1 d1mv8a2 d2pv7a2 d1xc2a3 d2ahra2  
d4xiya1 d2f1ka2 d1pgja2 d1i36a2 d1np3a2 d1l1j8a4 d1teaa3 d1qmga2  
d2i76a2 d2g5ca2 d1wdka3 d1dlja2 d3cuma3 d1kola2 d1f8fa2 d1qora2  
d1jqba2 d1vj0a2 d1cdoa2 d1gu7a2 d1d1ta2 d1xa0a2 d2dm6a2 d1jvba2  
d1rjwa2 d1llua2 d1h2ba2 d1tt7a2 d1piwa2 d1o89a2 d1iz0a2 d1e3ja2  
d1yb5a2 d1uufa2 d1e3ia2 d3gpdg1 d1vc2a1 d2nvwa1 d1u8fo1 d1ydwal  
d1hdgo1 d2g17a1 d1cf2o1 d2czca2 d1r0ka2 d1obfo1 d2cvoa1 d1ebfa1  
d1h6da1 d1i32a1 d1zh8a1 d2q49a1 d1qkia1 d1j5pa4 d3pzra1 d1xeaa1  
d1vkoa1 d1vm6a3 d3qvsa1 d2pkqo1 d1b7go1 d1gr0a1 d1p1ja1 d1lc0a1  
d1j0xo1 d3pwka1 d2hjsa1 d1zyao1 d1vkna1 d1t1ta1 d1nvmb1 d3sjua\_  
d3ojfa1 d1xu9a1 d2jjya1 d1n7ha\_ d1y1pa1 d1jtva\_ d4fs3a\_ d2bkaa1  
d1gy8a\_ d2c5aa1 d1ulsa\_ d1ooea\_ d2b69a1 d1y5ma1 d1spxa\_ d1aela\_  
d1bxka\_ d1ydea1 d1gega\_ d1hdoa\_ d1o5ia\_ d1e6ua\_ d1snya1 d2rhca\_  
d3zv4a\_ d5ceja\_ d2d1ya1 d1fjha\_ d3w8ea\_ d2fmua1 d1x1ta\_ d1rpna\_  
d3ay7a1 d1k2wa\_ d1eq2a\_ d2hrba1 d3ruaa\_ d2ew8a1 d4hwka\_ d1xgka\_  
d2bd0a1 d1yo6a1 d2a35a1 d2ntva\_ d1vl8a\_ d1hdca\_ d4bkua\_ d2ag5a1  
d2q45a\_ d1nffa\_ d4iy1a\_ d1zbqa1 d1kewa\_ d1ek6a\_ d1ja9a\_ d2q46a2

d1iy8a\_ d1cyda\_ d2ptga\_ d1hxha\_ dluzma1 d3lyla\_ d4m89a\_ d3wyea\_  
d2blla1 d1w6ua\_ d1sb8a\_ d2q2va\_ d4nr0a\_ d1e6wa\_ d2gasa\_ d3oiga1  
d2bgka1 d1mxha\_ d1vl0a1 d1rkxa\_ d1r6da\_ d1wmaa1 d1e7wa\_ d2c07a1  
d1xkqa\_ d3tzha\_ d1g0oa\_ d3lz6a\_ d1qyca\_ d1ledoa\_ d1gz6a\_ d1oc2a\_  
d1t2aa\_ d1zema1 d2xoxa\_ d1z45a2 d1geea\_ d1p33a\_ d3lt0a\_ d4e6pa\_  
d2wyua\_ d1db3a\_ d4q9na\_ d1xhla\_ d4o1ma\_ d1fmca\_ d2uvda\_ d2gdza1  
d1uaya\_ d2z1ma\_ d2o23a2 d2fr1a2 d2fr1a1 d1qsga\_ d1qyda\_ d4zjua\_  
d2a4ka1 d1yb1a\_ d1wvga1 d1yxma1 d3f4ba\_ d1mg5a\_ d1xg5a1 d1r55a1  
d3gboa\_ d1atla\_ d1kufa\_ d1buda\_ d4q1la\_ d1quaa\_ d1ypla\_ d1wnia\_  
d4ekfa\_ d2ckga\_ d1th0a\_ d2bkra\_ d1e2ta\_ d4c5pa\_ d2bsza1 d4bgfa\_  
d1w4ta1 d1ex0a4 d1g0da4 d2f4ma1 d1x3za\_ d1mdwa\_ d1ziva1 d1zcmal  
d1t3ca\_ d2a97a\_ d3f1ea\_ g1e1h.1 d3ioqa\_ d1fh0a\_ d1o0ea\_ d1khqa\_  
d1m6da\_ d2cb5a\_ d1cs8a\_ g8pch.1 d1s4va\_ d2pnsa\_ d1vsna1 d1mira\_  
d1iwda\_ d2oula\_ d7pcka\_ d3bwka\_ d3bcna\_ d2p86a\_ d1pvja\_ d1pcia\_  
d1gece\_ d1deua\_ d4bs6a\_ d1xkga1 d1cqda\_ d1jqpa2 d2c0ya\_ d2bdza\_  
d3p5ua\_ d2o36a\_ d1k9xa\_ d1zoya1 d1qo8a2 d1d4ca2 d1chua2 d1jnra2  
d2jk6a2 d2jk6a1 d1feca1 d1feca2 d1lpfa1 d1lpfa2 d1xhca1 d1xhca2  
d1dxla2 d1dxla1 d1m6ia2 d1onfa1 d1onfa2 d3lada2 d3lada1 d1w4xa1  
d1w4xa2 d1gesa2 d1mo9a1 d1xdia1 d1f12a2 d1f12a1 d1fcda1 d1fcda2  
d1h6va2 d1h6va1 d1mo9a2 d1gv4a2 d1gv4a1 d2gv8a2 d2gv8a1 d1aoga1  
d1aoga2 d1hyua1 d1ebda1 d1ebda2 d3dk9a1 d1q1ra2 d1q1ra1 d1gesa1  
d1zbfal d2z1ha\_ d2etja1 d3qioa1 d1j11a\_ d2e41a\_ d1j12a\_ d2lsna1  
d1io2a\_ d1uaxa\_ d2yv0x\_ d1mu2a1 d1i39a\_ d1ps9a2 d1o94a2 d1cjca1  
d1pn0a1 d1reoal d1ju2a1 d2f5va1 d3c96a1 d2gmha1 d1pj5a2 d1gpea1  
d1o5wa1 d1n4wa1 d1k0ia1 d2dw4a2 d2ivda1 d1seza1 d2voua1 d1kdga1  
d1s5ja1 d2hbja2 d2igia\_ d1wlja\_ d1qhta1 d4dlea1 d1tgoa1 d2f96a1  
d3tr8a1 d3mxma\_ d1q8ia1 d1y97a1 d1w0ha\_ d1kfsa1 d2py5a1 d1noya\_  
d1d5aa1 d1yt3a3 d2guia\_ d3mwpal d4kbl1a\_ d2v76a\_ d1wj1a1 d1aqca\_  
d1qqga2 d1qqga1 d1ntva\_ d1n3ha\_ d4dbba\_ d3f0wa1 d1p3ra\_ d1wgua1  
d2cy4a1 d3hqca\_ d1wvha1 d1xr0b1 d3nvva1 d1krha3 d2h88b1 d1n62a2  
d1t3qa2 d1zoyb1 d1jq4a\_ d1ffva2 d1dgja2 d1rm6c2 d1r7ha\_ d1faaa\_  
d1wika1 d1xfla\_ d1ttza1 d2f51a1 d1ti3a\_ d1nhoa\_ d1sena\_ d2i4aa\_  
d1ep7a\_ d1zmaa1 d1fo5a\_ d3lefa1 d3diea1 d2yana1 d1z6na1 d1oaza\_  
d3zywa1 d4aj8a\_ d1nm3a1 d4fiwa\_ d1wmja\_ d4hs1a1 d1iloa\_ d1xwaa1  
d1wjka1 d2vm1a\_ d1fb6a\_ d1gh2a\_ d1h75a\_ d1nw2a\_ d1kx5b\_ d3a6na\_  
d4m6ba2 d2nqbd\_ d3wkjd\_ d2yfwe\_ d4h9na\_ d5bnxa\_ d1kx5c\_ d3r45a\_  
d1eqzb\_ d4jjnb\_ d1f66c\_ d1eqza\_ d4wnnb\_ d1kx5a\_ d1u35c1 d1id3a\_  
d2nqbc\_ d1kx5d\_ d2b5ea2 d2b5ea3 d2b5ea1 d2b5ea4 d2kp1a1 d2kp2a1  
d1hyua4 d1j08a1 d1j08a2 d1pd212 d1nhya2 d2a2ra2 d1k0dd2 d1f2ea2  
d1gsua2 d1f3ba2 d2fhea2 d2pvqa1 d1tw9a2 d1oyja2 d1k0ma2 d3ik7a1  
d4is0a1 d1r5aa2 d1jlva2 d1m0ua2 d3gtub2 d1z9ha2 d1okta2 d1axda2  
d2gsra2 d1tu7a2 d1k3ya2 d1zgma1 d1b48a2 d1gnwa2 d1gwca2 d2gsta2  
d1glqa2 d1oe8a2 d1pn9a2 d1v2aa2 d1fw1a2 d1duga2 d3vrda1 d3vrda2  
d1fcdc1 d1h1oa2 d1h1oa1 d1m70a2 d1m70a1 d3zxha\_ d1cgl1a\_ d1rm8a\_

d1eaka2 d1hy7a\_ d2jsda\_ d1cxva\_ d1hv5a\_ d1i76a\_ d1ig8a1 d1czan2  
d1czan3 d1czan1 d1ig8a2 d1czan4 d1bg3a4 d1bg3a3 d1bg3a2 d1bg3a1  
d1qusa\_ d1qqya\_ d1gd6a\_ d1f6ra\_ d1livma\_ d2gv0a\_ d1iiza\_ d2z2fa\_  
d1j8xa\_ d1ghla\_ d1b9oa\_ d1741a\_ d1691a\_ d2o4wa\_ d1p37a\_ d1k28a3  
d1xjta1 d1jtma\_ d2f2qa\_ d4e97a1 d1iyka2 d1iyka1 d1rxta1 d1iica1  
d2za0a\_ d2c21a1 d2pjsa1 d1k11a\_ d2i7ra1 d1ecsa\_ d1xqaa1 d5cj3a1  
d1npba\_ d1jifa\_ d2p7oa\_ d1r9ca\_ d1mpya2 d1kw3b2 d1kw3b1 d4ghga1  
d1tfza1 d3isqa1 d3isqa2 d1sqia1 d1sqia2 d1lkda2 d1lkda1 d1mpya1  
d1cjxa1 d1sp9b2 d1t47a1 d1t47a2 d1flua2 d1sp8a1 d1sp8a2 d1flua1  
d2h0va\_ d4iuaa3 d4bvva\_ d5hpga\_ d3k65a\_ d1ki0a3 d1ki0a2 d1ki0a1  
d1a0ha1 d1pmla\_ d3sp8a3 d2feba1 d1qsta\_ d2beia1 d4m3sa\_ d1u6ma1  
d1ygha\_ d1yk3a1 d3dr6a\_ d1xmta\_ d1z4ea1 d2ge3a1 d2fiaa1 d2jdca1  
d1y9wa1 d3to7a\_ d1wwza1 d2fl4a1 d2ozua1 d2b5ga\_ d2cy2a1 d2p0wa\_  
d1cm0a\_ d4pswa\_ d1yrea1 d1yr0a1 d1m4ia\_ d2gana1 d1yvka1 d1ghea\_  
d2g3aa1 d1y7ra1 d2euia1 d1q2ya\_ d2fsra1 d1xeba\_ d2ae6a1 d1cjwa\_  
d1qsmma\_ d2aj6a1 d1y9ka1 d1i12a\_ d1vkca\_ d2atra1 d1n71a\_ d2d4pa1  
d2fiwa1 d2fe7a1 d1tiqa1 d2ou2a\_ d1yx0a1 d2fcka1 d1p0ha\_ d2j8ma\_  
d2pq8a\_ d1z4ra1 d1s3za1 d1ufha\_ d2hqya1 d2hqya2 d1ne9a1 d1lrza3  
d1ne9a2 d1xvqa1 d1pn0a2 d3hy2a\_ d2cvba1 d1o8xa\_ d1lu4a\_ d1we0a1  
d2bmxal d2a4va1 d1psqa\_ d1xiya1 d1q98a\_ d1n8ja\_ d1zofa1 d2ggta\_  
d3tjja\_ d4je1a1 d1o73a\_ d3s9fa\_ d2zcta\_ d1qmva\_ d1jfua\_ d2b1ka\_  
d5dvba1 d2b5xa1 d2v2ga\_ d1st9a\_ d3tb2a\_ d4llra\_ d4fh8a1 d1e2ya\_  
d1knga\_ d2h30a\_ d1i5ga\_ d2z9sa\_ d2f8aa1 d1tp9a1 d2b7ka\_ d1nm3a2  
d3hvva\_ d2wfca1 d4kcea\_ d1xvwa1 d4gqca1 d3qpma\_ d4k1fa\_ d1zzoa1  
d1gp1a\_ d1prxa\_ d1rw1a\_ d1z3ea1 d3l78a\_ d1cg2a1 d1yloa2 d1y7ea2  
d1y0ya3 d1lfwa1 d1vixa1 d1fnoa4 d1vh0a2 d1ysja1 d1vhea2 d1z21a1  
d2fvga2 d1vgya1 d1r3na1 d2grea2 d1xmba1 g1q71.1 d1rtqa\_ d1etha2  
d1w52x1 d2pp1a1 d1hpla2 d1lpbb2 d2oxea1 d1bu8a2 d1rp1a2 d1ysl1x\_  
d4hs9a\_ d1ex9a\_ d1ku0a\_ d3qmma\_ d1lgya\_ d4l3wa\_ d1llfa\_ d1gz7a\_  
d1ukca\_ d1cr6a2 d1bvsa3 d1ixra2 d3groa\_ d1pjaa\_ d1thta\_ d2ftba\_  
d1pmpa\_ d2rcqa1 d1fdqa\_ d4lkpa\_ d1sa8a\_ d1vyfa\_ d1lpja\_ d3vg7a1  
d4azqa1 d1o8va\_ d5bvqa\_ d1p6pa\_ d2qo4a\_ d1opba\_ d1yiva1 d1o1va\_  
d4bvma1 d4tkba\_ d4i3ba\_ d1bwya\_ d1ftpa\_ d1ggla\_ d4gkca\_ d1cbia\_  
d3p6da1 d1kqwa\_ d2a0aa1 d1xwdc1 d3kj4a\_ d1w8aa\_ d2ifga3 d1p9ag\_  
d1xkua\_ d3p0ya1 d1igra1 d1igra2 d1n8yc2 d1n8yc1 d1m6ba2 d1m6ba1  
d4dv8a2 d2bk7a\_ d3fjua\_ d1z5ra1 d1kwma1 d1uwya2 d1jqga1 d2c1ca1  
d1dtda\_ d1h81a2 d1h6ta2 d1h6ua2 d1i26a\_ d1cixa\_ d1y29a\_ d1v7fa\_  
d2jtba\_ d1d1ha\_ d1g9pa\_ d1llupa\_ d1qk7a\_ d1mb6a\_ d2a2va\_ d1niya\_  
d1i25a\_ d2mpqa\_ d1ie6a\_ d1kqha\_ d1la4a\_ d2mxoa1 d1dl0a\_ d1koza\_  
d1qk6a\_ d1emxa\_ d1lqra\_ d1c6wa\_ d1rmka\_ d1ixta\_ d1eyoa\_ d1fu3a\_  
d1g1pa\_ d1f3ka\_ d1fyga\_ d1rypd\_ d1irua\_ d1rypc\_ d3unfk\_ d1rypa\_  
d1j2pa\_ d1irui\_ d1j2qh\_ d3unfh\_ d1m4ya\_ d1rypb\_ d1irul\_ d1irug\_  
d1iru2\_ d1q5rh\_ d1rypg\_ d1iruf\_ d1q5qa\_ d1e94a\_ d1irub\_ d1ryph\_  
d3ty6a\_ d1iruj\_ d1iruk\_ d1rype\_ d1irud\_ d1irue\_ d3mi01\_ d1rypf\_

d1liruh\_ d2z3ba\_ d1liruc\_ d3mka2\_ d1liru1\_ glgk9.1 glor0.1 gle3a.1  
d1jgta2 d1lea0a3 d1lecfa2 d1q15a2 d1ct9a2 d1ao0a2 d1te5a\_ d1y14b1  
d2nn6i1 d1i94l\_ d2zjra2 d1smxa\_ d2qamc2 d1hh2p1 d2r7da1 d1rl2a2  
d1wfaq1 d3bzka4 d1x6oa2 d3a0ja\_ d2j01d2 d2ja9a1 d4q15a\_ d1hr0w\_  
d1luza\_ d2n3sa\_ d2vnud1 d1h95a\_ d1go3e1 d2nn6h1 d1ne3a\_ d2mo1a\_  
d1iz6a2 d1jjga\_ d1e3pa2 d2ix0a3 d2ix0a2 d2lxja\_ d1ueba3 d1ueba2  
d2z0sa1 d1u01a1 d2ix0a1 d2eifa2 d2je6i1 d3i2za1 d2c35b1 d2ahob2  
d1t9ha1 d3i4oa\_ d2qall1 d1jt8a\_ d2nn6g1 d1g6pa\_ d3cama\_ d1i94q\_  
d1c9oa\_ d1d7qa\_ d2ba0a1 d2vnud2 d2vnud3 d1khia2 d2qalq1 d1wi5a1  
d1xtda2 d1ny4a\_ d4w9ta\_ d1jvna1 d4x2ra1 d1ka9f\_ d1qo2a\_ d4axka1  
d1h5ya\_ d4u28a\_ d2y88a\_ d4wd0a\_ d1lvzwa1 d1eixa\_ d3exra\_ d2ffca1  
d2fdsa1 d3n3ma1 d2czda\_ d1q6oa\_ d2yyua\_ d1vqta1 d1dbta\_ d3ldva1  
d3syxa1 d1mkea1 d2p8va\_ d1xoda1 d1i7aa\_ d1qc6a\_ d1legxa\_ d4lt9a1  
d3tc7a1 d3hoja\_ d1i4na\_ d3vnda\_ d3n18a1 d1geqa\_ d3navaa1 d1v5xa\_  
d4a2ra1 d3tc6a1 d1ujpa\_ d4ijba\_ d1xcfa\_ d1vc4a\_ d1rd5a\_ d3b5va\_  
d2r80b\_ d1cqxa1 d1cg5a\_ d1gcvb\_ d3boma\_ d2h8fb\_ d2raoa\_ d3bj1a\_  
d4hrrb\_ d2r50a\_ d3d1kb\_ d2aa1b1 d3zhwa\_ d3hf4b\_ d3gdja\_ d1jebb\_  
d3bj1b\_ d1x9fb\_ d1wmub\_ d1gcva\_ d3bcqb\_ d3d4xb\_ d2dc3a\_ d3hf4a\_  
d4yu3a\_ d3k8ba\_ d1qpwb\_ d2r80a\_ d3bcqa\_ d1v4wa\_ d3wtgb\_ d1j17a\_  
d4esaa\_ d1a9we\_ d3d1ab\_ d1fsla\_ d4h21a\_ d1v4wb\_ d1mwca\_ d1vhba\_  
d1jeba\_ d1spgb\_ d1h97a\_ d1q1fa\_ d1tu9a1 d3d1aa\_ d1hdsb\_ d3hyub\_  
d2zfb\_ d3fs4a\_ d1oj6a\_ d1shrb\_ d4h21b\_ d4yu3b\_ d1spga\_ d3hrwa\_  
d3qqra\_ d3at5a\_ d4wchd\_ d3hyua\_ d1cg5b\_ d1uc3a\_ d1hbra\_ d2raob\_  
d1outb\_ d4esab\_ d3gdjb\_ d3qqqa\_ d1x9fc\_ d3vrfa\_ d1litha\_ d3mkba\_  
d3d4xa\_ d3mjpa\_ d1j16a\_ d3fh9a\_ d1outa\_ d2dc3b\_ d1it2a\_ d3eoka\_  
d3g46a\_ d1qpwa\_ d3vrfb\_ d1ch4a\_ d1x9fd\_ d1hdsa\_ d2zfa\_ d3mkbb\_  
d1or4a\_ d3wtga\_ d1a4fa\_ d3fh9b\_ d3bomb\_ d3cy5a\_ d3at5b\_ d1x9fa\_  
d2oifa\_ d4lmb\_ d3v57a\_ d1kn1a\_ d1cpca\_ d4f0ta\_ d2vjha\_ d4po5b\_  
d1eyxa\_ d1alla\_ d4f0tb\_ d1b33b\_ d1b8db\_ d4h0mb\_ d1b33a\_ d2vjhb\_  
d4lmb\_ d2vmlb\_ d1allb\_ d2vjta\_ d3dbja\_ d2vmla\_ d2vjtb\_ d4f0ub\_  
d1f99b\_ d4rmpa1 d1liaa\_ d1eyxb\_ d2uulb\_ d4lmsb\_ d4f0ua\_ d2bv8a\_  
d1f99a\_ d2bv8b\_ d2c71b\_ d3dbjb\_ d4rmpb1 d1b8da\_ d4h0ma\_ d3v57b\_  
d1kn1b\_ d1liab\_ d2uula\_ d2j96a\_ d3nqyb\_ d4gera\_ d1bqba\_ d1k8qa\_  
d2xqfa\_ d1ea5a\_ d1f6wa\_ d1dx4a\_ d1qe3a\_ d1k4ya\_ d4qwwa\_ d2ha2a\_  
d3c8da2 d2pbla1 d1jkma\_ d1jjia\_ d1jjfa\_ d2m5ta\_ d1wqsa\_ d5bpea\_  
d2ipha\_ d1lvoa\_ d2bhga1 d3tnta\_ d3sjia\_ d3d23a1 d2fyqa\_ d3tloa\_  
d3zvea1 d2hrva\_ d3q3ya1 d4asha1 d1s5ja2 d1qhta2 d4dlea2 d1tgoa2  
d3py8a2 d1q8ia2 d2py5a2 d1d5aa2 d3ulra1 d1g9ka2 d1kapp2 d1k7ia2  
d1f74a\_ d3l21a\_ d2e1da\_ d1to3a1 d1w3ia\_ d1sfla\_ d1n7ka\_ d1vcva1  
d4imea\_ d1wa3a\_ d2ocza1 d1f2ja\_ d3m16a\_ d2yxga\_ d1ub3a\_ d3a5fa\_  
d1fbaa\_ d1l6wa\_ d1xfba1 d1wx0a1 d1vpxa1 d1ojxa\_ d2a4aa1 d1xkya1  
d3cq0a1 d3s1xa\_ d1f05a\_ d1fdja\_ d3cpra1 d4d2ja\_ d4mh8a\_ d1mu2a2  
d4i7ga1 d3rp2a\_ glucy.1 d1fuja\_ d2zchp\_ d3w94a\_ d1si5h\_ d1lo6a\_  
g2pka.1 d1cgha\_ d1kigh\_ d1a5ia\_ d3s9ba\_ d1hj8a\_ d1ao5a\_ d2anya\_

d1q3xa1 d1gvza\_ dlazza\_ d4gsoa\_ d2f91a1 dliaua\_ dlgdna\_ dleufa\_  
g1fiw.1 d1eq9a\_ d4nfea\_ d2rdla\_ dlspja\_ d1elva1 d1a7sa\_ dlekbb\_  
d1pfxc\_ d1yc0a\_ d2aiqa\_ g1fiz.1 d1fi8a\_ d4k60a\_ d4dgja\_ d1mzaa\_  
d1op0a\_ d3tjva\_ d1pytd\_ d1sgfg\_ g1gg6.1 d2eeka\_ g1rtf.1 d1a0ja\_  
d3g01a\_ d1pytc\_ d4e7na\_ d1ddja\_ d1z8ga1 d2hlca\_ d1npma\_ d1brup\_  
g1jou.1 d1sgfa\_ d1autc\_ g2hnt.1 g1kdq.1 d3s69a\_ d4crga\_ d1fxya\_  
d1bqya\_ d1ra6a\_ d1muka\_ d3gsza\_ d1khva\_ d1te9a\_ d2xwha\_ d3uqsa\_  
d3hkwa\_ d3n6ma\_ d2cjqa\_ d2xyma\_ d1teba\_ d1te8a\_ d1s48a\_ d1u09a1  
d4wfxa\_ d3tyqa\_ d2pgga1 d1dzka\_ d4tlja\_ d2a2ua\_ d4wfva\_ d3t1da\_  
d4iaxa\_ d3zq3a\_ d2nnda\_ d1i4ua\_ d1kxoa\_ d1bbpa\_ d1kt7a\_ d1exsa\_  
d3s26a1 d1lf7a\_ d1qfta\_ d4gh7a\_ d1z24a1 d1qabe\_ d1xkia\_ d1ew3a\_  
d3bx7a\_ d4iawa1 d1n0sa\_ d3kzaa\_ d2k23a\_ d2l9ca1 d2joza1 d1gm6a\_  
d3kffa\_ d3saoa1 d1e5pa\_ d1yupa1 d1iiua\_ d4lu0a\_ d3unda1 d3e9aa1  
d1vr6a2 d1n8fa\_ d2qkfa\_ d1d9ea\_ d1o60a\_ d1e69a\_ d1mv5a\_ d3g60a4  
g1ii8.1 d1ewqa2 d1ji0a\_ d1qhla\_ d1v43a3 d2wmfa1 d1vpla\_ d1g2912  
d4a82a2 g1f2t.1 d2d62a1 d3tuic1 d2bbsa1 d3g60a3 d2ixea\_ d1g6ha\_  
d1sgwa1 d2qi9c\_ d3rlfa1 d3b60a1 d3d31a2 d2pzea1 g1xew.1 d1jj7a\_  
d1oxxk2 d2onka1 d1wlwa\_ d1iwea\_ d1qf5a\_ d1vmaa2 d1nija1 d1np6a\_  
d2p67a1 d3ihla\_ d1okkd2 d1lsl1a2 d1slma2 d1iona\_ d2v40a\_ d3hida\_  
d2vo1a1 d2g0ta1 d1vcoa2 d1j8mf2 d1g3qa\_ d1xjca\_ d1p9ba\_ d1qzxa3  
d1ihua2 d1ihua1 d2qm8a\_ d1dj2a\_ d4ioja\_ d1cp2a\_ d1yrba2 d1hyqa\_  
d3gqba2 d1skye3 d1xp8a1 d1tf7a2 d1tf7a1 d1ye8a1 d1skyb3 d2qe7d2  
d4blta\_ d4huta\_ d3l1daa2 d4hyya\_ d2i3ba1 d1crla\_ d3j9tb2 d3ntua2  
d1vdza1 d2z43a\_ d1e9ra\_ d1nlfa\_ d3ziaa2 d1n0wa\_ d1g6oa\_ d3ziad2  
d3j9ta2 d3gqbb2 d2i49a\_ d1nnfa\_ d1xvxa\_ d1ursa\_ d1h3da1 d1iuda\_  
d4m1va1 d1twya\_ d3e13x\_ d2nxoa1 d4pfua\_ d3ttma\_ d1elja\_ d2qmw1  
d1us5a\_ d1y3na1 d1jeta\_ d1uqwa\_ d4f19a1 d2esna2 d3thia\_ d3fasa1  
d2uyeb\_ d2xwva1 d1r9la\_ d2fyia1 d1pb7a\_ d2ozza1 d1sw5a\_ d1nh8a1  
d1vr5a1 d2g29a\_ d1xs5a\_ d3lswa\_ d2z23a\_ d3w9va\_ d3tcha\_ d1z7me1  
d3q27a\_ d1p99a\_ d1ve4a1 d2i6ea1 d4mcoa1 d4n8ya\_ d1eu8a\_ d1zbma1  
d1hsla\_ d1lixca2 d1j1na\_ d1xvya\_ d1y9ua\_ d2z22a1 d1xoca1 d4oera\_  
d1wdna\_ d5f1qa1 d1xt8a1 d1i6aa\_ d4gwoa\_ d4igta1 d1pc3a\_ d4mmpa1  
d1o63a\_ d2cz1a1 d2onsa2 d4mija1 d4ok5a1 d2bmfa1 d2bmfa2 d1yksa1  
d1yksa2 d1jr6a\_ d2qeqa1 d2j1qa1 d1eh3a\_ d3skpa\_ d1dtza1 d1ieja\_  
d1jnfa2 d1ce2a1 d1jnfal d1b1xa2 d1b1xa1 d1jw1a1 d1jw1a2 d1ryoa\_  
d1h76a1 d1h76a2 d1c4oa1 d2p6ra3 d2p6ra4 d1oywa2 d1oywa3 d1wrba1  
d1w36b2 d1w36b1 d1c4oa2 d3bora\_ d1t6na\_ d2eyqa5 d2eyqa3 d2eyqa2  
d2zu6a2 d1veca\_ d1uaaa1 d1w36d1 d2g9na1 d1z3ix2 d2rb4a\_ d1hv8a1  
d1hv8a2 d1t5ia\_ d1w36c2 d2j0sa2 d2j0sa1 d3hjha1 d1z5za1 d1qdea\_  
d1z63a1 d1s2ma2 d1s2ma1 d1wp9a1 d1wp9a2 d1gm5a3 d1gm5a4 d3dina4  
d3dina3 d1q0ua\_ d1w36c1 d1z3ix1 d1nkta3 d1nkta4 d1uaaa2 d1w36d2  
g1qhh.1 d2fwra2 d2fwra1 d3q3ma\_ d1za0a1 d1mxra\_ d2inca\_ d1jk0a\_  
d2inca\_ d1mhyb\_ d3hf1b\_ d1mtyb\_ d1r2fa\_ d2uw1a\_ d1mhyd\_ d3n37a\_  
d1afra\_ d1syya\_ d1mtyd\_ d2o1za\_ d1uzra\_ d1smsa\_ d2fkza\_ d1zujal



d1s3qa1 d2fjca1 d1z6om1 d1veia\_ d4dyya\_ d1jiga\_ d3gvya\_ d2pyba\_  
d4cy9a1 d3bvfa1 d1r03a\_ d2cf7a\_ d1nf4a\_ d1zs3a1 d4iwka\_ d3ka8a\_  
d3np0x\_ d1n1qa\_ d11b3a\_ d4e6ka\_ d1z6oa1 d2fzfa1 d4dyua\_ d3ge4a\_  
d1jgca\_ d4am4a\_ d2z6ma\_ d1ji5a\_ d1vlga\_ d11koa1 d3qz3a\_ d1o9ra\_  
d2ffxj\_ d1euma\_ d1yv1a1 d2v2pa\_ d1j30a\_ d4di0a\_ d1dpsa\_ d1oewa\_  
d2qzxa\_ d2asia\_ d1psoe\_ d1smra\_ d2h6ta\_ d1pfza\_ d1lizda\_ d3hd8a\_  
d1j71a\_ d1dpja\_ d4aa9a\_ d1t6ex\_ g1b5f.1 g11ya.1 g1htr.1 d1qdma2  
d1bxoa\_ d1wkra\_ d1tzsa\_ d1libqa\_ d2qzwa\_ d1ex4a2 d1c6va\_ d1bdqa\_  
d3ggta\_ d3ixoa\_ d1mrxa\_ d2haha\_ d1tw7a\_ d4njsa\_ d1sgua\_ d2p3da\_  
d1nsoa\_ d3d3ta\_ d2rkfa\_ d1c6ya\_ d2rspa\_ d3ogpa\_ d3ekwa\_ d2o4na\_  
d2j9ja\_ d1baia\_ d3ggua\_ d31zua\_ d4npua\_ d4j55a\_ d2r8na\_ d2fxda\_  
d2p3ca\_ d4dqea\_ d3ttpa\_ d3t3ca\_ d2p3aa\_ d2hc0a\_ d2fdda\_ d3mwsa\_  
d1sr9a2 d1rqba2 d1k8rb\_ d1wgra1 d1ef5a\_ d1wfy1 d1e8ya3 d1wgya1  
d2cs4a1 d1wxma1 d2byeal d3kh0a1 d2byfa1 d1wxaa1 d1e7ua3 d117ya\_  
d1wgda1 d1wgga1 d4q5eb\_ d1wjna1 d1se9a\_ d3n3kb\_ d1wz0a1 d1we6a1  
d2m0xa\_ d2gbka\_ d3rt3b1 d1wh3a1 d1sifa\_ d2ekec2 d4ii2b1 d4hk2a1  
d1c3ta\_ d1wgha1 d1ttna1 d1j8ca\_ d1wx8a1 d3v6cb1 d2ma9b\_ d4i6lb1  
d1bt0a\_ d2jvca1 d1iyfa\_ d2k1fa\_ d1wxva1 d1wf9a1 d1t0ya\_ d2io0b2  
d1x1ma1 d2gbma\_ d1zw7a1 d2m17a\_ d1ud7a\_ d1we7a1 d21wpa\_ d2gbja\_  
d1wjua1 d1v6ea1 d1v86a1 d4eewa\_ d1wiaa1 d4icva\_ d4gu2a\_ d1wx7a1  
d1wy8a1 d4hjka1 d2fazal d1v5oa1 d3ruib\_ d1eo6a\_ d3waob\_ d2r2qa1  
d3m95a\_ d3wana\_ d2a13a1 d2cr5a1 d1wj4a1 d1s3sg\_ d3ubra\_ d1d4ca1  
d2k3va\_ d1ft5a\_ d1qdba\_ d1m1qa\_ d2j7aa\_ d1h21a\_ d1ogyb\_ d4fasa\_  
d1jnia\_ d1oaha\_ d1sp3a\_ d2h0ba\_ d2erfa\_ d1h30a2 d3mw4a1 d1pz7a\_  
d2r1ba\_ d3v64a1 d1d2sa\_ d3bopa1 d3mw3a1 d1okqa1 d1okqa2 d1ccza2  
d1vcaa1 d1dr9a2 d1ic1a1 d2d9qb1 d2nxyb2 d1um8a\_ d1ixza\_ d1qvra2  
d1qvra3 d1qzma\_ d1sxjc2 d1jr3d2 d2p65a\_ d118qa2 d1g8pa\_ d3hu3a3  
d1sxjd2 d1njfa\_ d1in4a2 d1sxja2 d1tuea1 d2ce7a2 d1w5sa2 d1sxjb2  
d1d2na\_ d1ny5a2 d1ofha\_ d2gnoa2 d2a5yb3 d1fnna2 d1u0ja1 d11v7a\_  
d1iqpa2 d2fnaa2 d1ixsb2 d4gita\_ d1sxje2 d2e3fa\_ d1mm0a\_ d2e3ea\_  
d21lda\_ d2ny8x\_ d2e3ga\_ d2ny9x\_ d2nz3a\_ d2k4ua\_ d1hp2a\_ d21u9a\_  
d1baha\_ d2meoa1 d1wm7a\_ d1hlya\_ d1n8ma\_ d1jlza\_ d1wpda\_ d1c55a\_  
d1pvza\_ d1wt7a\_ d1rjia\_ d1wz5a\_ d1m2sa\_ d1pjva\_ d1c49a\_ d1qkya\_  
d2ktca1 d1wmta\_ d1j5ja\_ d1rlga\_ d1t0za\_ d2i61a\_ d1t1ta\_ d1sn4a\_  
d1kv0a\_ d21kba\_ d1npia\_ d1wwna\_ d1pe4a\_ d2kbka\_ d21i7a\_ d1djta\_  
d2kbha\_ d1dq7a\_ d1sega\_ d1omya\_ d1zywa1 d1jzaa\_ d1n9wa1 d1e1oa1  
d1c0aa1 d1b8aa1 d110wa1 d3a74a1 d1eova1 d1t61c1 d1iyjb4 d1iyjb5  
d1iyjb3 d1o7ia\_ d4ipca1 d1x3ea\_ d4apva\_ d1jb7a1 d1jb7a2 d1jb7a3  
d3kdfa\_ d1ue1b\_ d1wjja1 d3eiva\_ d1xjva2 d1xjva1 d2ccza2 d1se8a\_  
d111oc\_ d1jb7b\_ d1qvca\_ d3ulla\_ d1qzga\_ d1miua4 d1miua5 d1miua3  
d3g48a1 d1gd7a\_ d1mkha\_ d1jjcb3 d1pyba\_ d3ubub\_ d1legia\_ d1qo3c\_  
d1v7pa\_ d1tdqb\_ d3ubua\_ d1c3ab\_ d1h8ua\_ d3bx4b\_ d1t8ca1 d1sb2a1  
d1qdda\_ d2ziba1 d3cada\_ d1byfa\_ d1j34b\_ d1jwia\_ d1jzna\_ d1c3aa\_  
d1oz7b\_ d1wmza\_ d3bdwb\_ d1hq8a\_ d1fifa1 d1dv8a\_ d3hupa\_ d1wk1a1

d1umra\_ d2afpa\_ d3bx4a\_ d1gz2a\_ d1sl6a\_ d1v7pb\_ d3g8ka\_ d1ixxa\_  
d1j34a\_ d1jwib\_ d1g1sa1 d1y17a1 d1ja3a\_ d1fvub\_ d3bdwa\_ d1sb2b1  
d1fvua\_ d1umrc\_ d1oz7a\_ d4m17a\_ d3cfwa1 d1ypqa1 d1g1ta1 d3fd4a\_  
d3l9jc\_ d4dn8a1 d1v4lb\_ d2msba\_ d1dgsa2 d1fvia1 d1p16a1 d1x9na2  
d1pfsa\_ d2a1ka\_ d1rpma\_ d2shpa1 d1yfoa\_ d1l8ka\_ d2ooqa1 d1g4us2  
d1p15a\_ d1lara2 d1lara1 d1wcha\_ d2fh7a2 d2fh7a1 d1ohea2 d2f4da\_  
d1rxda\_ d2hxpa\_ d1xria\_ d1d5ra2 d1fpza\_ d3ezza\_ d4y2ea\_ d1i9sa\_  
d3azya\_ d3wvja\_ d1upsa1 d1ajoa\_ d2hyka\_ d2vy0a\_ d1o4ya\_ d3o5sa\_  
d3d6ea\_ d3atga\_ d1dypa\_ d1umza\_ d3i4ia\_ d1c1la\_ d4lbqa\_ d1a78a\_  
d1slta\_ d4no4a\_ d3zsj\_ d3duia\_ d1g86a\_ d1is3a\_ d1qmja\_ d1hlca\_  
d1tdha3 d1q3ba3 d1ee8a3 d1k82a3 g1qmo.1 g1len.1 d3zyra\_ d1fnya\_  
d1n47a\_ g21tn.1 d1avba\_ d3usua\_ d1dhkb\_ d1f9ka\_ d1lukga\_ d1g8wa\_  
d1g9fa\_ d1wbf\_ d3wcsa\_ g1loe.1 d1mvqa\_ d1hq1a\_ d1v6ia\_ d1dbna\_  
d1qnwa\_ d1fx5a\_ d4l8qa\_ d1ioaa\_ d3n35a\_ d3h33a\_ d1rwja\_ d19hca\_  
d1os6a\_ d3bxua\_ d3h4na\_ d1i77a\_ d3caoa\_ d1j0pa\_ d2ctha\_ d1duwa\_  
d1ofwa\_ d2e84a\_ d1hh5a\_ d3h34a\_ d1dszb\_ d1a6ya\_ d3cbba\_ d1ynwa1  
d1r4ia\_ d1hcqa\_ d2hana\_ d2hanb\_ d2enva1 d1kb4b\_ d2n11b\_ d1l01a\_  
d2dara2 d2dara1 d1wyha2 d2dloa2 d1rutx4 d1rutx3 d2cuqa2 d1x4la2  
d1x4la1 d1x3ha2 d1x3ha1 d2d8za1 d1x61a2 d1x6aa1 d1x6aa2 d2cora2  
d2cora1 d1v6ga1 d1v6ga2 d2d8za2 d1x64a1 d1x64a2 d1b8ta1 d2co8a1  
d1x63a2 d2dj7a2 d2dj7a1 d2cu8a2 d2cu8a1 d1g47a2 d1g47a1 d1j2oa1  
d1wyha1 d2dloa1 d1wiga1 d1wiga2 d2cupa2 d2cupa3 d1x68a1 d2d8ya2  
d2d8ya1 d1m3va2 d1x62a1 d1x68a2 d1x61a1 d1b8ta3 d1b8ta2 d2d8xa2  
d2d8xa1 d1x4ka1 d1x4ka2 d2cuqa1 d1m3va1 d2co8a2 d1j2oa2 d1x63a1  
d2cura1 d2cura2 d1x62a2 d1op9a\_ d1y01a1 d1etzb1 d1egj11 d2gsib1  
d1nj9a1 d4jfh1 d1aqk11 d1t2ja\_ d1l04h1 d1zvya1 d3v4v11 d4enec1  
d1kxtb\_ d5e8ea1 d2pxya\_ d4weud\_ d1xiwc\_ d2esvd1 d1qznh\_ d1logae1  
d1f4xh1 d4n1hb\_ d3ezjb1 d3mlw11 d1kfah1 d1etza1 d1b4jh1 d3cfic\_  
d4w68a\_ d2arja1 d1ek3a\_ d2ok011 d1vera\_ d1uwgh1 d1blnb1 d1fpth1  
d1rzga1 d2giya1 d4m3kb1 d1nc2a1 d2nyyd1 d1ncna\_ d1fbih1 d5dxwa\_  
d4fqqa1 d1dqdh1 d1jfq11 d1kelh1 d1faih1 d1frgl1 d1figl1 d4m6n11  
d1fo0a\_ d4hxb11 d3b5ga\_ d3quyd1 d2h9gb1 d1i8kb\_ d2dd8h1 d2ck0h1  
d1eaja\_ d4w6wb1 d2a6ib3 d1t66d1 d2e27h\_ d1ob1b1 d1f11b1 d2v7na1  
d1ad0a1 d2xt1b1 d1pskh1 d4i13b1 d2op411 d1a0q11 d1uwel1 d1za3a1  
d1ncb11 d4uu9a\_ d1bm3h1 d1cloh1 d1nqba2 d1cf8h1 d4y5va\_ d1mhph1  
d5anma1 d4cdgc1 d4ldeb\_ d1y01b1 d2pcpb1 d1z3g11 d1dfb11 d1fh5h1  
d3g5xa1 d1tzib1 d4dn311 d3zhka1 d2b1hh1 d2uyla1 d1f3dh1 d1nj9b1  
d2agjh1 d2h1p11 d1q72h1 d8fabb1 d1ndmb1 d1rjca1 d4u6hb1 d3upca\_  
d2fbj11 d1osph1 d1tvda\_ d2cjvh\_ d4fhbd1 d1bd2d1 d1rz7h1 d3nn8a\_  
d1blna1 d1knoa1 d1nfda1 d2bmkb1 d1dq11\_ d1igyb1 d1igfl1 d12e8h1  
d3utz11 d1nc2b1 d1rihh1 d4mwfb1 d4jvpa1 d1mieh1 d1rhfa1 d1fgn11  
d1sbs11 d1lp9e1 d1dn0a1 d4lqf11 d1iaih1 d1kgcd1 d1mh5b1 d1gpol1  
d2g60h3 d1f8t11 d2jixd1 d4grwh\_ d1fo0b\_ d1bfob1 d1axsa1 d1u9ka\_  
d1nmbh\_ d1h8na1 d1h8na2 d1jguh1 d4eura1 d3sdy11 d35c8h1 d1w7211

d1mvub\_ d1i9rh1 d1ob1a1 d4wenb\_ d1yeeh1 d3ietc1 d1f58h1 d1ad0b1  
d1mqk1\_ d1nbvh1 d4b50a\_ d3r8bb\_ d1baf11 d1mamh1 d4rgne1 d2gsgb\_  
d35c811 d1bafh1 d1ai1h1 d2pcpa1 d2fath1 d2x1pa\_ d1orsb1 d1ibgl1  
d1shma\_ d1a2yb\_ d1u0qa\_ d2coqa\_ d1hilb1 d1qfwi\_ d1jv5b\_ d1fn4b1  
d5e0qa\_ d1nsh1 d1plgl1 d4ocx11 d1kb5h1 d1rzfh1 d1pg7x1 d2fx7h1  
d2oi9c\_ d1l7il1 d3eyva1 d1d5il1 d4ffyl\_ d1tet11 d1a6wh\_ d1ac6a\_  
d3dvfa\_ d1nfde1 d1mimh1 d1ri8a1 d1jhlh\_ d3dura\_ d1fskb1 d1f97a1  
d3so3b1 d2ak4d1 d1lp9f1 d4z7wf1 d1l7th1 d4y5ya\_ d4x7ec1 d1emth1  
d1ikf11 d1nlbh1 d4utal1 d1bjma1 d1eapb1 d1u6ah1 d2dtgd1 d1kj2b\_  
d1xeda1 d1c1eh1 d1fgvh\_ d2bnub1 d2fb4h1 d2dtgb1 d1ktrh\_ d1jpth1  
d1qkz11 d4hepg\_ d2atpb1 d1flrh1 d2hrpl1 d1mvfa\_ d1iaim1 d3k80a1  
d2jb5h1 d3zkxc\_ d4grwe\_ d1it9h1 d1rhhb1 d3w9ec\_ d1e4wh1 d1sy6h1  
d2j6eh1 d3qxta\_ d1jglh1 d1p7ka1 d1tzhb1 d4n8pa1 d1gaf11 d2jelh1  
d1wioa2 d4i0cc1 d1cicb1 d1lmka2 d1lmka1 d1iqwh1 d1lorqb1 d1ejoh1  
d1jnlh1 d4zg1a\_ d43c9b\_ d1ggbl1 d1wejh1 d3q6fa1 d1f3dj1 d3c6la1  
d1bqlh1 d3p9wb\_ d1a3r11 d1h0db1 d2uzil\_ d1eo8l1 d1qfwl\_ d1n7ml1  
d1igja1 d1c5ch1 d2a9mh\_ d1rmfh1 d1fj1b1 d4heme\_ d1ccza1 d1a5fh1  
d1ogad1 d1dlfh\_ d1qa9b\_ d1vgel1 d3qskb\_ d1sjxa\_ d4ozfg1 d1sq2n\_  
d1qd0a\_ d1kcvh1 d1c5db1 d3qcull1 d8faba1 d3bn9d1 d1mjuh1 d4y8dc\_  
d7fabh1 d3dvgb1 d1l0011 d1a6tb1 d1gigh1 d1kcrh1 d2hwhz11 d1yjdc1  
d3clfl1 d4krna\_ d1d17l\_ d1e6o11 d1mexh1 d3r0ma\_ d4kkna\_ d1fnsl1  
d1oaqh\_ d1rzia1 d1ucbh1 d1ncw11 d4b41a\_ d1nfdfl1 d2mpah1 d2d7tl1  
d4grwf\_ d4b5ea\_ d1l1k3h1 d3u79a\_ d4u3xa\_ d1ghfl1 d1bvkb\_ d1mcww1  
d1b88a\_ d1jrhh1 d32c2b1 d4wemb\_ d1dsfh\_ d1op3h1 d1ce111 d1iqda1  
d1qoka1 d1qoka2 d1qfuh1 d2crya1 d1ay1h1 d1oaql\_ d3ab0b\_ d1rur11  
d1t4kb1 d1bz7b1 d1n0xh1 d1for11 d1lucb11 d4w6yb\_ d43c9a\_ d2aab11  
d1tzia1 d4n1ca\_ d1k6qh1 d3g9ab\_ d4tvsal1 d1igmh\_ d1pz5b1 d3dx9a1  
d3wxwh\_ d1nakh1 d1kcul1 d3eaka\_ d4qlra1 d1cr9l1 d1d9ka\_ d1f4x11  
d1deea1 d2i27n2 d1c12a1 d2orb11 d1j8hd1 d1mcph1 d1c5da1 d1kenh1  
d1bd2e1 d1h5ba\_ d4x7fc1 d3upaa\_ d1t3fa1 d1indh1 d2dtgc1 d4hc111  
d1zv5a1 d4wgvb\_ d1uwgl1 d4f37k1 d1aqkh1 d1vesa\_ d3zkqd\_ d1fpt11  
d1l0411 d1knob1 d3rrqa\_ d1ct8b1 d4orz\_ d1mlbb1 d4hgkc1 d1dqd11  
d1bogb1 d4ozhe1 d1dr9a1 d1i7za1 d1dn0b1 d1kell1 d1rzi1 d1ypzf1  
d1wtla\_ d1hkfa\_ d1fail1 d1figh1 d2vyre\_ d1sjva\_ d1ohqa\_ d1bfoa1  
d1pkqb1 d1mjul1 d1b4jl1 d1nsl1 d2arjb1 d1p4bh\_ d4aj0a\_ d3nn8b\_  
d2rcja1 d1f2xk\_ d4v1dd\_ d1adqh1 d2eksa\_ d4k3ga\_ d1jfqh1 d1uweh1  
d1frgh1 d4gftb\_ d1uz8b1 d4n1ea\_ d1bm311 d1clo11 d3mcka1 d2vq1a1  
d1ae6h1 d4aq1b1 d1uj3b1 d1nbqa1 d1fh511 d2ck011 d2ywza\_ d1q7211  
d4nxbx\_ d1hila1 d4hz1b1 d2j8811 d1zmya1 d1cd0a\_ d1a4ka1 d1psk11  
d1a0qh1 d4krmb\_ d1ncbh1 d2fbjh1 d1j8he1 d1i3ua\_ d1cf811 d1fe8h1  
d2plya1 d1eeqa\_ d2x89a\_ d1o10a\_ d2r01h1 d1ub5a1 d1dfbh1 d3eyvb1  
d4jdvb1 d4p2cg\_ d2gsia1 d2agj11 d1u3ha1 d2h1ph1 d1rih1 d1fskc1  
d1boga1 d2a7711 d1osp11 d1qfoa\_ d3dwta\_ d2fx711 d1rz711 d3stba1  
d1pkqa1 d1b6da1 d1dzba2 d1dzba1 d1kj2a\_ d4l1ha\_ d1rzgb1 d1dq1h\_

d12e8l1 d1mie1l d1jmaa\_ d1sbsl1 d1fgnh1 d1f58l1 d1mqkh\_ d1ndgb1  
d3qegl1 d1iaail1 d2aw2a1 d1tqbc1 d3fo2a1 d4dkaa\_ d1f8th1 d2g60l1  
d2ywy\_ d1uj3a1 d1yc7a\_ d3bd3a\_ d4w6xb1 d1nmb1\_ d1i8ka\_ d1rjlb1  
d1ypze1 d1p7kb1 d1kxqe\_ d1gpoh1 d2z4qa1 d1w72h1 d1i9rl1 d4qgya1  
d4xt1c\_ d2qqnh1 d1cica1 d3c08h1 d2cd0a\_ d2bdnh1 d1hnga1 d1mam1l  
d1nldh1 d1cr9h1 d4lcih1 d3bkyh1 d3qg7l1 d1ai1l1 d1kxvc\_ d4iosd\_  
d1l7ih1 d2x1qa\_ d1ub6b1 d3k74b\_ d1ibgh1 d1teth1 d1igya1 d1hxma1  
d2x6ma\_ d2e7la\_ d5e03a\_ d1qfwm\_ d2r0kh1 d1igjb1 d1rurh1 d1plgh1  
d1mj8h1 d1yuhb1 d3fmg1l d1rzfl1 d1emt1l d1ad9b1 d1igtb1 d1nlb1l  
d1d5ih1 d3k7ua\_ d4ffyh\_ d1bwwa\_ d3dvgal d1a6ta1 d1fgvl\_ d4qxgl1  
d1mim1l d1jhl1\_ d2hffb1 d2hh0l1 d1qkzh1 d1l7tl1 d1afvh1 d1iaii1  
d2cjuh\_ d1um5h1 d2ghwb2 d2ghwb1 d1kgce1 d2fgwh1 d1ikfh1 d1dvfd\_  
d2i24n1 d2xtjb\_ d1za3b1 d2yc1a\_ d2hh0h1 d2x1oa\_ d1bvka\_ d1rjla1  
d5e7ba1 d1igta1 d1il1b1 d2fb4l1 d1mvua\_ d1jpt1l d32c2a1 d1fvca\_  
d1iqdb1 d2hrph1 d2p4ab\_ d4qo1a\_ d1p2cb1 d1wt5c\_ d1t4ka1 d5c1mb\_  
d1it9l1 d1bz7a1 d1b2wh1 d1e4wl1 d1jnl1l d1yedb1 d1za6b1 d3u7aa\_  
d1igfh1 d3gnml1 d1orsa1 d1wejl1 d1a2ya\_ d1hxmb1 d1gafh1 d2j4wh1  
d1pz5a1 d1j05a\_ d1a3rh1 d4fqll1 d1qfwh\_ d1eo8h1 d1n7mh1 d4s11a\_  
d1kegh1 d5da4a\_ d1iqwl1 d3whxb1 d1vgeh1 d1deeb1 d1c12b1 d1t2ql1  
d1ad9a1 d3gsnb1 d3b2uc1 d1ggbh1 d1t3fb1 d1nak1l d4ocmc\_ d1lila1  
d2v7hb3 d2esve1 d1mcoh1 d2qr0b1 d2q3aa\_ d1ct8a1 d1kcr1l d2pxyb\_  
d2uzih\_ d5c3ld\_ d3durb\_ d1c5cl1 d2ak4e1 d1d17h\_ d1xiwd\_ d1mlba1  
d1rmfl1 d1i7zb1 d1dlfl\_ d2xa3a\_ d5bq7b1 d1dqqb1 d3h42l1 d1egjh1  
d1kcvl1 d1fe8l1 d2j6e1l d1f3rb2 d1lk3l1 d1sm3h1 d1q0xh1 d1ghfh1  
d7fab1l d1igch1 d1lo0h1 d4idla\_ d5c2b1\_ d1jrh1l d3zhda1 d4kfzc\_  
d1b0wa\_ d1e6oh1 d1mex1l d4krpb\_ d1fnsh1 d1ncwh1 d4hgma\_ d4eigb1  
d4rzca\_ d2mpal1 d4y5xa\_ d5en2b1 d3lrga1 d4ej1c1 d1rhha1 d1j05b\_  
d1forh1 d1q9wb1 d2wzpd\_ d2aq2a1 d1h0da1 d3revb1 d2ij0c1 d1tzh1  
d4m7jl1 d1k6ql1 d3b9kc1 d1igml\_ d3qeu1 d1dsfl\_ d1celh1 d1kcu1  
d1zvha1 d1zvoa1 d1tqbb1 d1ay1l1 d2qsc1l d2cgrh1 d1nl0h1 d1ken1l  
d3eo0a1 d4n9ob1 d1n0xl1 d3k1kc\_ d2aq2b1 d1ck1a1 d1lenfa1 d1i4pa1  
d1vloa1 d1et9a1 d1esfa1 d2g9hd1 d4ohja1 d1klud1 d1eu3a1 d1ty0a1  
d1fnua1 d2cqva1 d1fhga\_ d2k1ma\_ d2dl2a1 d1biha3 d1biha1 d1biha4  
d3qp3a1 d1g1ca\_ d1gxea\_ d1cvsc2 d1cvsc1 d1xmwa2 d1m4ka2 d2otpa2  
d1biha2 d1rhfa2 d2fcba2 d2fcba1 d1wwbx\_ d1gsma2 d1lepfa1 d1lepfa2  
d2dava1 d1waaa\_ d1f97a2 d1x44a1 d1vcaa2 d1fnla2 d1fnla1 d3b5ha2  
d3h8na2 d3h8na1 d1bjba1 d1bjba2 d1pd6a\_ d1f2qa2 d1f2qa1 d3cx2a\_  
d1nbqa2 d3b5ha1 d1n26a1 d1xiwb\_ d1xaua\_ d1fltx\_ d2ifga1 d1olla1  
d1olla2 d1cs6a4 d1cs6a3 d1cs6a2 d1cs6a1 d2gw5a2 d1sy6a1 d1xiwa\_  
d1lucta2 d1lucta1 d1ry7b2 d1gl4b\_ d1qz1a3 d1olza1 d2c9aa1 d1wwca\_

**Family-25 (b.29.1.1)**

**Positive dataset contains 5 protein sequences.**

d3zyra\_ d3usua\_ d3wcsa\_ d4l8qa\_ d3n35a\_

**Negative dataset contains 3967 protein sequences.**

d1orva2 d1xfda2 d1m32a\_ d1libja\_ d1c7na\_ d1iuga\_ d4q75a\_ d2bkwa1  
d1t3ia\_ d1n8pa\_ d1qz9a\_ d1jff9a\_ d1leg5a\_ d1p3wa\_ d3kgwa\_ d1c11a\_  
d2ctza1 d1vjoa\_ d2rfva\_ d1gc0a\_ d1cs1a\_ d1d2fa\_ d2ch1a1 d1qgna\_  
d1pffa\_ d1elua\_ d1sefa\_ d1sfna\_ d1sq4a\_ d3gv5b1 d1t94a2 d3bq0a2  
d3rcha\_ d3k40a\_ d1pmma\_ d2cfba1 d1dfoa\_ d1o69a\_ d1bj4a\_ d3k28a\_  
d2bwpa\_ d3lg0a\_ d2fnua\_ d3ou5a\_ d1z7da1 d1b9ha\_ d1iaya\_ d4msoa\_  
d1bs0a\_ d1s0aa\_ d1sffa\_ d3tqxa\_ d1mdoa\_ d3qboa\_ d3pgya\_ d1bjna\_  
d2dkja\_ d1ejia\_ d1vefa1 d4wxga\_ d3bs8a\_ d3gbxa1 d1w23a\_ d1u08a\_  
d1lc5a\_ d2ay1a\_ d1bw0a\_ d3pd6a\_ d7aata\_ d2csta\_ d1j32a\_ d1fg7a\_  
d4wlha\_ d1o4sa\_ d1v2da\_ d1gdea\_ d1m6sa\_ d1v72a1 d1svva\_ d1ajsa\_  
d1wsta1 d2f8ja2 d1lk9a\_ d1vp4a1 d1xi9a1 d2gb3a1 d1yaaa\_ d1m8pa3  
d1ddla\_ d1e57b\_ d1auyb\_ d1fwxa1 d1libya\_ d2wo3b\_ d1shxa\_ d1f56a\_  
d1bypa\_ d1lazca\_ d1ws8a\_ d3u25a\_ d1cuoa\_ d1id2a\_ d1rkra\_ d2iaac\_  
d4dp1x\_ d1nwpa\_ d2gima\_ d2i7sa\_ d1qhqa\_ d1gyca3 d1hfua2 d1kbva1  
d1kbva2 d1sdda1 d1sdda2 d1gyca2 d1mzya1 d2bw4a1 d1aoza1 d1aoza3  
d1aoza2 d1kyaa2 d1kyaa3 d1kyaa1 d1mzya2 d4e9sa1 d1sddb1 d1sddb2  
d1hfua1 d1hfua3 d1oela2 d1oela1 d1v10a2 d1v10a3 d1v10a1 d2dara2  
d2dara1 d1wyha2 d2dloa2 d1rutx4 d1rutx3 d2cuqa2 d1x41a2 d1x41a1  
d1x3ha2 d1x3ha1 d2d8za1 d1x61a2 d1x6aa1 d1x6aa2 d2cora2 d2cora1  
d1v6ga1 d1v6ga2 d2d8za2 d1x64a1 d1x64a2 d1b8ta1 d2co8a1 d1x63a2  
d2dj7a2 d2dj7a1 d2cu8a2 d2cu8a1 d1g47a2 d1g47a1 d1j2oa1 d1wyha1  
d2dloa1 d1wiga1 d1wiga2 d2cupa2 d2cupa3 d1x68a1 d2d8ya2 d2d8ya1  
d1m3va2 d1x62a1 d1x68a2 d1x61a1 d1b8ta3 d1b8ta2 d2d8xa2 d2d8xa1  
d1x4ka1 d1x4ka2 d2cuqa1 d1m3va1 d2co8a2 d1j2oa2 d1x63a1 d2cura1  
d2cura2 d1x62a2 d2y5ia\_ d1qlsa\_ d1psra\_ d3n22a\_ d2egda\_ d4ggfc\_  
d2wcea\_ d2luca\_ d4aqia\_ d3nsia\_ d2lp3a\_ d1j55a\_ d1a4pa\_ d1nsha\_  
d1a3qa1 d1liknc\_ d3brda1 d1oy3c\_ d1imhc1 d1gjia1 d1zk9a1 d2cxka1  
d2bema\_ d1pama1 d1lea9c1 d1qhoa1 d2fhfa2 d2fhfa1 d1k3ia1 d1j0ha1  
d1cxl1a1 d2bhua1 d1edqa1 d1flsa2 d1ut9a2 d1gvia1 d1txka1 d4alac\_  
d1pjwa\_ d1rera1 d1s6na\_ d3uzqb\_ d2phla2 d2phla1 d1fxza2 d1fxza1  
d1lrha\_ d1uija1 g1dgw.1 d2v09a\_ d1uika2 d1uika1 d1dgwa\_ d1ep0a\_  
d2pa7a1 d1wlta1 d1nxma\_ d2c0za1 d1ktja\_ d1fstb\_ d1ex0a1 d1g0da1  
d1ju8a\_ d4w9ta\_ d1jvna1 d4x2ra1 d1ka9f\_ d1qo2a\_ d4axka1 d1thfd\_  
d4u28a\_ d2y88a\_ d4wd0a\_ d1vzwa1 d4mh8a\_ d1mu2a2 d4i7ga1 d2bjca1  
d2hsga1 d1qpza1 d1efaa1 d1r0ka3 d1j5pa3 d1vkoa2 d1vm6a2 d3qvsa2  
d1gr0a2 d2ovga\_ d1sq8a\_ d1rzsa\_ d3kz3a\_ d3orca\_ d3gpdg2 d2q49a2  
d1hdgo2 d2g17a2 d2cvoa2 d2czca1 d3pwka2 d1obfo2 d1i32a2 d1zyao2  
d2pkqo2 d1b7go2 d2hjsa2 d1cf2o2 d1vkna2 d1nvmb2 d2msya\_ d2djoa1  
d2r5za\_ d1au7a1 d1f43a\_ d2lmda1 d1akhb\_ d1s7ea1 d3nara\_ d1zq3p1  
d2craa1 d1mija\_ d4uuta\_ d3a01a\_ d1x58a1 d3rkqa1 d3cmya1 d2cqxa1  
d2da6a1 d1e3oc1 d1fjla\_ d1mh3a1 d1ig7a\_ d1x41a1 d1wh7a1 d1gt0c1  
d2mw8a\_ d1lfup\_ d1x2ma1 d1b72a\_ d1wi3a1 d1jgga\_ d1wjha1 d1x2na1  
d1mnmc\_ d2cuea1 d3k2aa\_ d2hosa\_ d2jwta2 d1pufa\_ d1oetcl d2hi3a\_  
d1b8ia\_ d4j19a\_ d3lnqa\_ d1wh5a1 d1b8ib\_ d1fexa\_ d2cqra1 d1guua\_

d1ug2a1 d2cqqa1 d2ajea1 d4a69c\_ d1h8ac1 d2crga1 d2iw5b1 d1xc5a1  
d1ofcx1 d2cu7a1 d1wgxa1 d2cjja1 d2ckxa1 d1gvda\_ d1hcra\_ d1gdta1  
d1u78a2 d1xg1a1 d1itya\_ d1hlva1 d1hlva2 d1iufa1 d1igna2 d1b10a1  
d1d5ya1 d1d5ya2 d3lv8a\_ d1s3ga1 d1zaka1 d1s4qa\_ d3tvt2a d1uf9a\_  
d1khta\_ d1ckea\_ d1osna\_ d1p5zb\_ d4tmka\_ d3cm0a\_ d1tmka\_ d1jaga\_  
d3h86a\_ d1t0hb\_ d1nn5a\_ d2h92a\_ d3kb2a1 d2c95a1 d1yj5a2 d1kgda\_  
d1ly1a\_ d2ak3a1 d1vyva2 d1deka\_ d2grja1 d1p3ja1 d1y63a\_ d1e4ya1  
d1s96a\_ d3iija1 d1lvga\_ d1nksa\_ d1vyua2 d4e22a\_ d1qf9a\_ d1jjva\_  
d1q3ta\_ d1ki9a\_ d1lw7a2 d1teva\_ d1kjwa2 d2iyva2 d1viaa\_ d1e6ca\_  
d1g3ma\_ d1j99a\_ d1t8ta1 d1nsta\_ d1fmja\_ d1zrha\_ d1ls6a\_ d2a3ra\_  
d1aqua\_ d2zptx\_ d3ckla\_ d1texa\_ d1q44a\_ d2gwha\_ d1k6ma1 d1z0ja1  
d3umra2 d3gj0a1 d2gaoa1 d1yzga1 d1x3sa1 d1g7sa4 d1puja\_ d1udxa2  
d1kk1a3 d2o52a\_ d1jwyb\_ d1zcaa2 d1zcba2 d2fv8a1 d2cjwa\_ d3dz8a1  
d1xzpa2 d1vg8a\_ d4qxaa\_ d2ew1a1 d1x1ra1 d2bcgy\_ d3doea1 d3cona\_  
d3rega\_ d3wyga\_ d1upta\_ d2b6ha1 d1zd9a1 d1lnza2 d1r5ba3 d1n0ua2  
d1r2qa\_ d2f91a1 d2rhda\_ d3q3jb\_ d3q85a\_ d1efma1 d1r8qa\_ d2gf9a1  
d2akab1 d1ek0a\_ d1z08a1 d2gcoa1 d2dyla2 d4g01b\_ d2cxxa1 d1svia\_  
d3q72a\_ d1ni3a1 d4ac9a4 d2erxa1 d2bmea\_ d1wxqa1 d2gf0a1 d4ldja1  
d1zunb3 d1d5ca\_ d4lv5b\_ d1efca3 d1kmqa\_ d2g6ba1 d3lrpa\_ d1tada2  
d2y8ea\_ d4rd4a1 d1z06a1 d2heia\_ d3a58b\_ d1u0la2 d1d2ea3 d1zj6a1  
d2ocba\_ d3rwoa\_ d1mr3f\_ d2e9sa1 d4u5xa1 d2iwra\_ d2fn4a1 d3bwdd\_  
d2nzja1 d2atva1 d2ksqa\_ d3l43a\_ d1mkya2 d1mkya1 d1wmsa\_ d1jnja3  
d2rmka\_ d1f6ba\_ d1f60a3 d1gota2 d1jala1 d2fh5b1 d1g16a\_ d2wblc\_  
d1m7ba\_ d1wf3a1 d1f5na2 d1t9ha2 d1z6xa1 d1z0aa1 d2fg5a1 d2a5ja1  
d2bcjq2 d1s0ua3 d1ky3a\_ d4y0va\_ d4lhwa\_ d2qmea1 d2atxa1 d1egaa1  
d1ryha\_ d1moza\_ d1nrjb\_ d2erya1 d3bfka\_ d1puia\_ d1fzqa\_ d3j3az1  
d3t5ga\_ d1shza2 d3defa\_ d2f7sa1 d3raba\_ d3tsoa\_ d3aq4a\_ d2a17a1  
d3sfva1 d3bc1a\_ d2ncda\_ d1sdma\_ d3h4sa1 d2heha\_ d2grya\_ g3kin.1  
d1kk8a2 d1goja\_ d1f9va\_ d2mysa2 d1lkxa\_ d3t0qa\_ d4db1a1 d3gbja\_  
d1ry6a\_ d1v8ka\_ d1k8ka2 d1k8ka1 d3uleb1 d3i33a2 d3i33a1 d1dkgd2  
d1dkgd1 d4ci6a2 d1jcf1a1 d4a2ba2 d2fxua1 d1yaga2 d1yaga1 d4cbua2  
d1bupa2 d3vrda1 d3vrda2 d1fcdc2 d1fcdc1 d1h1oa2 d1m70a2 d1m70a1  
d1lig8a1 d1czan2 d1czan3 d1czan1 d1lig8a2 d1czan4 d1bg3a4 d1bg3a3  
d1bg3a2 d3h3no1 d3h3no2 d3ezwa2 d1zc6a1 d1zbsa1 d1zbsa2 d1zc6a2  
d2ch5a2 d2ch5a1 d1zxo2a1 d1zxo1a1 d2d0oa3 d2d0oa2 d1nbwa3 d1hroa\_  
d4gedb\_ d3zooa\_ d1mz4a\_ d1gu2a\_ d1f1fa\_ d1dvva\_ d1c6ra\_ d1c75a\_  
d1e29a\_ d1gdva\_ d1cnoa\_ d1h32b\_ d1co6a\_ d2bh4x\_ d2aiua\_ d5cytr\_  
d1jdl1a\_ d1i8oa\_ d2zboa\_ d3dmia\_ d1ls9a\_ d1wvec\_ d2yk3a\_ d3ph2b\_  
d1dw0a\_ d5aura\_ d1ql3a\_ d1qn2a\_ d1f1ca\_ d1evsa\_ d1cnt1\_ d1pvhb\_  
d1z7ca\_ d1huwa\_ d1bgea\_ d1rhga\_ d1f6fa\_ d1f45b\_ d1i1rb\_ d1axia\_  
d1etea\_ d3tgxb\_ d1scfa\_ d2z3qa1 d3qb1a\_ d1hula\_ d1m48a\_ d4nkqb\_  
d1eera\_ d1v7mv\_ d5e4ea\_ d2o27a\_ d3b5ka\_ d2psma1 d4zf7a\_ d3uf5a\_  
d4x51a\_ d1d9ca\_ d4ypgc1 d3oq3a\_ d1lqsl\_ d1n1fa\_ d1lau1a\_ d1wu3i\_  
d3bes1\_ d3ux9a\_ d1v8fa\_ d2ejca\_ d3muae1 d1ihoa\_ d3q12a1 d4dnxa2

d1m8pa2 d1g8fa2 d1jhda2 d1x6va2 d2b71a\_ d3rbaa\_ d2qtra\_ d1nupa\_  
d3l92a\_ d1f9aa\_ d1qjca\_ d2h29a\_ d1vlha\_ d1lod6a\_ d1lw7a1 d4ruka\_  
d2e17a\_ d1liq0a2 d1irxa2 d1r6ta2 d1livsa4 d2cyba\_ d1rqga2 d1j09a2  
d2yxna\_ d1h3fa1 d1ffya3 d2g36a1 d1lnzja\_ d1jila\_ d1n31a\_ d1i61a\_  
d1pfva2 d1h3na3 d3n9ia\_ d3sz3a1 d3sw2a\_ d1moxc\_ d1dx5i3 d1edmb\_  
d1aut12 d1aut11 d1nqlb\_ d1dva11 d1szba2 d1kigl\_ d2y5fl\_ d1ijqa2  
d1gk5a\_ d1g1sa2 d1nt0a3 d1xdtr\_ d1lmja2 d1lmja1 d1nzia2 d2wphe\_  
d1klil\_ d1pfx12 d1pfx11 d1p9ja\_ d1g1ta2 d1f7ea\_ d4yzub\_ d1qx2a\_  
d1lig5a\_ d1s5ja2 d1qhta2 d4dlea2 d1tgoa2 d3py8a2 d1q8ia2 d1kfsa2  
d2py5a2 d1exra\_ d1tiza1 d1nyaa\_ d1g8ia\_ d1ggwa\_ d1wdcc\_ d3fwba\_  
d1ggza\_ d2o5ga\_ d1ctaa\_ d1m45a\_ d3i5gc\_ d1sl8a\_ d1fpwa\_ d2scpa\_  
d2roaa\_ d4aqra\_ d3pn7b\_ d1br1b\_ d2mysb\_ d1s6ca\_ d1bjfa\_ d2obha\_  
d1jfka\_ d1jf0a\_ d1qv0a\_ d1lkja\_ d2mlfc\_ d2m97a\_ d2d8na\_ d4by5a\_  
d1jbaa\_ d4nqga\_ d1wdcb\_ d2mysc\_ d1j7qa\_ d1s6ia\_ d1uhka2 d1r2ua\_  
d1dtla\_ d3kf9a\_ d3pn7c\_ d1qjta\_ d1c07a\_ d1gjya\_ d1y1xa\_ d1hqva\_  
d1dvia\_ d1qxp2a\_ d4usla\_ d1k94a\_ d1wkya2 d1uuqa\_ d3wh9a\_ d4mlra\_  
d1xyza\_ d4xuya\_ d2je8a5 d4bf7a1 d3cuia\_ d1ur4a\_ d1qw9a2 d1lodza\_  
d2vzsa5 d1bqca\_ d2x2ya1 d1hjqa\_ d1qnra\_ d4y7ea1 d1vjza\_ d4k68a\_  
d2v3ga\_ d4hpga\_ d1nofa2 d1nq6a\_ d1h4pa\_ d1aq0a\_ d3ziza\_ d4bs0a\_  
d1ecea\_ d1h1na\_ d1ta3b\_ d1w91a2 d1i1wa\_ d1uhva2 d1us3a2 d1legza\_  
d7a3ha\_ d1tvna1 d3nyda1 d1ghsa\_ d2cyga1 d4xv0a\_ d2c8na2 d1w32a\_  
d3emca\_ d1v6ya1 d1foba\_ d2uwfa1 d2fgla\_ d3niya1 d2c0ha1 d1rh9a1  
d1yq2a5 d1szna2 d1fa2a\_ d1pama4 d5do8a1 d1ea9c3 d2fhfa5 d1qhoa4  
d1avaa2 d1m53a2 d4m8ua1 d2gjpa2 d1lwha2 d4howa1 d1ktba2 d1j0ha3  
d3vm5a1 d2x1ia\_ d1wzaa2 d1uasa2 d2diea1 d1mxga2 d1ht6a2 d1eswa\_  
d1iv8a2 d5cpsa\_ d1ud2a2 d1zjaa1 d3gbea1 d1kwa2 d1wdpa\_ d1gcya2  
d1g5aa2 d1hvxa2 d3dhpa2 d2bhua3 d4do4a1 d3qgva1 d1e43a2 d1g94a2  
d2d3na2 d1gjwa2 d1gvia3 d1x1na1 d1r7aa2 d1tz7a1 d4toqa\_ d1wb0a1  
d1w9pa1 d1itxa1 d1kfwa1 d1goia2 d1edqa2 d2gsja\_ d1hjxa1 d1jnda1  
d1vf8a1 d3wdpp1 d3wq5a\_ d1gnxa\_ d4gxpa\_ d4hz8a\_ d1e4mm\_ d3aiua\_  
d1wcca1 d3ahxa\_ d1v02a\_ d2dgaa\_ d1pbga\_ d1vffa1 d1qoxa\_ d4ha4a\_  
d1mixa2 d1e5wa2 d1isna2 d2a16b2 d1g4ma1 d2hmta\_ d1lssa\_ d1liuka\_  
d2csua1 d3q9ub\_ d2yv1a1 d3q9na\_ d2d59a\_ d1oi7a1 d2yv2a1 d1y81a1  
d1wgqa1 d1v89a1 d2coda1 d1zc3b\_ d1wg7a1 d1u5ea1 d1v61a1 d2coca1  
d2ys1a1 d1v5pa1 d1nty2a\_ d1wjma1 d1wila1 d1u29a\_ d1xx0a1 d1unqa\_  
d2zkmx3 d1fhoa\_ d1v88a1 d2adza1 d1x1fa1 d1p6sa\_ d2coaa1 d1v5ma1  
d1faoa\_ d2x18a\_ d1dyna\_ d1x1ga1 d4kaxb\_ d2j59m1 d1kilb2 d1xcga2  
d1txda2 d1u5da1 d1dbha2 d1wlha\_ d1upqa\_ d1v5ua1 d1foea2 d2fjla1  
d1eaza\_ d2dfka2 d2cofa1 d1kz7a2 d9ldta1 d2ewda3 d1up7a1 d2dfda1  
d1s6ya1 d1vjta1 d7mdha1 d1hyea1 d1t2da1 d1ojsa3 d1b8pa1 d1ldna1  
d1hyha1 d1civa1 d2a92a1 d1ez4a1 d1i0za1 d1y6ja1 d1gv0a1 d1ur5a1  
d1llda1 d1obba1 d1v8ba1 d1gdha1 d1l7da1 d2llda1 d1mx3a1 d1ygya1  
d1qp8a1 d1j4aa1 d2naca1 d1npya1 d3t4ea2 d1a4ia1 d1o0sa1 d2hk9a2  
d2egga2 d1b26a1 d1bvua1 d1gq2a1 d1c1da1 d1leha1 d1gtma1 d1leuza1

d1nvta1 d3dona2 d1ledza1 d1vi2a1 d1p77a1 d1nyta1 d1b0aa1 d1vl6a1  
d1v9la1 d1txga2 d3f47a1 d1mv8a2 d2pv7a2 d1xc2a3 d2ahra2 d4xiya1  
d2f1ka2 d1pgja2 d1i36a2 d1np3a2 d1lj8a4 d1teaa3 d1qmg2 d2i76a2  
d2g5ca2 d1wdka3 d1dlja2 d3cuma3 d1kola2 d1f8fa2 d1qora2 d1jqba2  
d1vj0a2 d1cdoa2 d1gu7a2 d1d1ta2 d1xa0a2 d2dm6a2 d1jvba2 d1rjwa2  
d1h2ba2 d1tt7a2 d1piwa2 d1o89a2 d1liz0a2 d1e3ja2 d1yb5a2 d1uufa2  
d1vj1a2 d1e3ia2 d3gpdg1 d1vc2a1 d2nvwa1 d1u8fo1 d1ydwa1 d1hdgo1  
d2g17a1 d1cf2o1 d2czca2 d1r0ka2 d1obfo1 d2cvoa1 d1ebfa1 d1h6da1  
d1i32a1 d1zh8a1 d2q49a1 d1qkia1 d1j5pa4 d3pzra1 d1xeea1 d1vkoa1  
d1vm6a3 d3qvsa1 d2pkqo1 d1b7go1 d1gr0a1 d1p1ja1 d1lc0a1 d1j0xo1  
d3pwka1 d2hjsa1 d1zyao1 d1vkna1 d1tlt1a1 d1nvmb1 d3sjua\_ d3ojfa1  
d1xu9a1 d2jjya1 d1n7ha\_ d1y1pa1 d1h5qa\_ d1jtva\_ d4fs3a\_ d2bkaa1  
d1gy8a\_ d2c5aa1 d1ulsa\_ d1o0ea\_ d2b69a1 d1y5ma1 d1spxa\_ d1aela\_  
d1bxka\_ d1ydea1 d1gega\_ d1hdoa\_ d1o5ia\_ d1e6ua\_ d1snya1 d2rhca\_  
d3zv4a\_ d5ceja\_ d2d1ya1 d1fjha\_ d3w8ea\_ d2fmua1 d1x1ta\_ d1rpna\_  
d3ay7a1 d1k2wa\_ d1eq2a\_ d2hrba1 d3ruaa\_ d2ew8a1 d4hwka\_ d1xgka\_  
d2bd0a1 d1yo6a1 d2a35a1 d2ntva\_ d1vl8a\_ d1hdca\_ d4bkua\_ d2ag5a1  
d2q45a\_ d1nffa\_ d4iy1a\_ d1zbqa1 d1kewa\_ d1ek6a\_ d1ja9a\_ d2q46a2  
d1iy8a\_ d1cyda\_ d2ptga\_ d1hxha\_ d1uzma1 d3lyla\_ d4m89a\_ d3wyea\_  
d2b11a1 d1w6ua\_ d1sb8a\_ d2q2va\_ d4nr0a\_ d1e6wa\_ d2gasa\_ d3oiga1  
d2bgka1 d1mxha\_ d1vl0a1 d1rkxa\_ d1r6da\_ d1wmaa1 d1e7wa\_ d2c07a1  
d1xkqa\_ d3tzha\_ d1g0oa\_ d3lz6a\_ d1qyca\_ d1ledoa\_ d1gz6a\_ d1loc2a\_  
d1t2aa\_ d1zema1 d2xoxa\_ d1z45a2 d1geea\_ d1p33a\_ d3lt0a\_ d4e6pa\_  
d2wyua\_ d1db3a\_ d4q9na\_ d1xhla\_ d4o1ma\_ d1fmca\_ d2uvda\_ d2gdza1  
d1uaya\_ d2z1ma\_ d2o23a2 d2fr1a2 d2fr1a1 d1qsga\_ d1qyda\_ d4zjua\_  
d2a4ka1 d1yb1a\_ d1wvga1 d1yxma1 d3f4ba\_ d1mg5a\_ d1xg5a1 d1xd3a\_  
d3ifwa\_ d1ex0a4 d1g0da4 d2f4ma1 d1x3za\_ d1mdwa\_ d1qxp4 d1ziva1  
d1zcm1 d1t3ca\_ d1lepwa3 d2a97a\_ d3fiea\_ g1elh.1 d3ioqa\_ d1fh0a\_  
d1o0ea\_ d1khqa\_ d1m6da\_ d2cb5a\_ d1cs8a\_ g8pch.1 d1s4va\_ d2pnsa\_  
d1vsna1 d1mira\_ d1iwda\_ d2oula\_ d7pcka\_ d3bwka\_ d3bcna\_ d2p86a\_  
d1pvja\_ d1pcia\_ d1gece\_ d1deua\_ d4bs6a\_ d1xkga1 d1cqda\_ d1jqpa2  
d2c0ya\_ d2bdza\_ d3p5ua\_ d2o36a\_ d1k9xa\_ d1ex4a2 d1c6va\_ d2jk6a2  
d2jk6a1 d1feca1 d1feca2 d1lpfa1 d1lpfa2 d1xhca1 d1xhca2 d1dxla2  
d1dxla1 d1gera2 d1m6ia2 d1onfa1 d1onfa2 d3lada2 d3lada1 d1w4xa1  
d1w4xa2 d1gesa2 d1mo9a1 d1xdia1 d1fl2a2 d1fl2a1 d1fcda1 d1fcda2  
d1h6va2 d1h6va1 d1mo9a2 d1gv4a2 d1gv4a1 d2gv8a2 d2gv8a1 d1aoga1  
d1aoga2 d1hyua1 d1ebda1 d1ebda2 d3dk9a1 d1q1ra2 d1q1ra1 d1gesa1  
d1zbf1a1 d2z1ha\_ d2etja1 d3qioa1 d1j11a\_ d2e41a\_ d1j12a\_ d2lsna1  
d1lio2a\_ d1uaxa\_ d2yv0x\_ d1mu2a1 d1lekea\_ d1i39a\_ d1pn0a1 d1reo1  
d1ju2a1 d2f5va1 d3c96a1 d2gmha1 d1pj5a2 d1gpea1 d1n4wa1 d1k0ia1  
d2dw4a2 d2ivda1 d1seza1 d2voua1 d1kdga1 d1s5ja1 d2hbja2 d2igia\_  
d1wlja\_ d1qhta1 d4dlea1 d1tgoa1 d2f96a1 d3tr8a1 d3mxma\_ d1q8ia1  
d1y97a1 d1w0ha\_ d1kfsa1 d2py5a1 d1noya\_ d1d5aa1 d1yt3a3 d2guia\_  
d3mwp1a1 d4kbl1a\_ d1b9ra\_ d1offa\_ d1frra\_ d3wcqa\_ d1e9ma\_ d1l5pa\_



d1wria\_ d1i7ha\_ d3av8a\_ d1czpa\_ d1rfka\_ d3plma1 d3b2ga\_ d2bt6a2  
d1v58a1 d1t3ba1 d4ilfa2 d4npba2 d1jmx4 d1jmx3 d1pbya3 d1jmx1  
d1pbya1 d1pbya2 d1r7ha\_ d1faaa\_ d1wika1 d1xfla\_ d1ttza1 d2f51a1  
d1ti3a\_ d1nhoa\_ d1sena\_ d2i4aa\_ d1zmaa1 d1fo5a\_ d3lefa1 d3diea1  
d2yana1 d1z6na1 d1oaza\_ d3zywa1 d4aj8a\_ d1nm3a1 d4fiwa\_ d1wmja\_  
d4hs1a1 d1iloa\_ d1xwaa1 d1wjka1 d2vm1a\_ d1fb6a\_ d1gh2a\_ d1h75a\_  
d1nw2a\_ d1kx5b\_ d3a6na\_ d4m6ba2 d2nqbd\_ d3wkjd\_ d2yfwe\_ d4h9na\_  
d5bnxa\_ d1kx5c\_ d3r45a\_ d1eqzb\_ d4jjnb\_ d1f66c\_ d1eqza\_ d4wnnb\_  
d1kx5a\_ d1u35c1 d1id3a\_ d2nqbc\_ d1kx5d\_ d2b5ea2 d2b5ea3 d2b5ea1  
d2b5ea4 d2kp1a1 d2kp2a1 d1hyua3 d1hyua4 d1j08a1 d1j08a2 d1pd212  
d1nhya2 d2a2ra2 d1k0dd2 d1f2ea2 d1gsua2 d1f3ba2 d2fhea2 d2pvqa1  
d1tw9a2 d1oyja2 d1e6ba2 d3ik7a1 d4is0a1 d1r5aa2 d1jlva2 d1m0ua2  
d3gtub2 d1z9ha2 d1okta2 d1axda2 d2gsra2 d1tu7a2 d1k3ya2 d1zgm1  
d1b48a2 d1gnwa2 d1gwca2 d2gsta2 d1glqa2 d1oe8a2 d1pn9a2 d1v2aa2  
d1fw1a2 d1duga2 d1nira1 g1f8v.1 d1novc\_ d2bbvc\_ d4iilya\_ d4olta\_  
d1qgia\_ d1qqya\_ d1gd6a\_ d1f6ra\_ d1livma\_ d2gv0a\_ d1iiza\_ d2z2fa\_  
d1j8xa\_ d1gh1a\_ d1b9oa\_ d3w3ea\_ d4tx7a\_ d3cqla\_ d4msta\_ d3iwra\_  
d2z37a\_ d4dyga\_ d2za0a\_ d2c21a1 d2pjsa1 d1klla\_ d2i7ra1 d1lecsa\_  
d1xqaa1 d5cj3a1 d1jifa\_ d2p7oa\_ d1r9ca\_ d1nkia\_ d4iuaa3 d4bvva\_  
d5hpga\_ d3k65a\_ d1ki0a3 d1ki0a2 d1ki0a1 d1a0ha1 d3sp8a3 d2feba1  
d1qsta\_ d2beial d4m3sa\_ d1u6ma1 d1ygha\_ d1yk3a1 d3dr6a\_ d1xmta\_  
d1z4ea1 d2ge3a1 d1bo4a\_ d2fiaa1 d2jdca1 d1y9wa1 d3to7a\_ d1wwza1  
d2f14a1 d2ozua1 d2b5ga\_ d2cy2a1 d2p0wa\_ d1cm0a\_ d4pswa\_ d1yrea1  
d1yr0a1 d1m4ia\_ d2gana1 d1yvka1 d1ghea\_ d2g3aa1 d1y7ra1 d2euia1  
d1q2ya\_ d2fsra1 d1xeba\_ d2ae6a1 d1cjwa\_ d1qsma\_ d2aj6a1 d1y9ka1  
d1i12a\_ d1vkca\_ d2atra1 d1n71a\_ d2d4pa1 d2fiwa1 d2fe7a1 d1tiqa1  
d2ou2a\_ d1yx0a1 d2fcka1 d1p0ha\_ d2j8ma\_ d2pq8a\_ d1z4ra1 d1s3za1  
d1ufha\_ d1dosa\_ d1gvfa\_ d3qm3a1 d2fjka\_ d1xvqa1 d1pn0a2 d3hy2a\_  
d2cvba1 d1o8xa\_ d1lu4a\_ d1we0a1 d2bmxa1 d2a4va1 d1psqa\_ d1xiya1  
d1q98a\_ d1n8ja\_ d1zofa1 d2ggta\_ d3tjja\_ d4je1a1 d1o73a\_ d3s9fa\_  
d2zcta\_ d1qmva\_ d1jfua\_ d2b1ka\_ d5dvba1 d2b5xa1 d2v2ga\_ d1st9a\_  
d3tb2a\_ d4llra\_ d4fh8a1 d1e2ya\_ d1knga\_ d2h30a\_ d1i5ga\_ d2z9sa\_  
d2f8aa1 d1tp9a1 d2b7ka\_ d1nm3a2 d3hvva\_ d2wfca1 d4kcea\_ d1xvwa1  
d4gqca1 d3qpma\_ d4k1fa\_ d1zzoa1 d1gpla\_ d4od7a1 d1z6ma1 d4mcua1  
d4dvca1 d3l9sa\_ d1un2a\_ d3rppa\_ d1cg2a1 d1yloa2 d1y7ea2 d1y0ya3  
d1lfwa1 d1vixa1 d1fnoa4 d1vhoa2 d1ysja1 d1vhea2 d1z21a1 d2fvga2  
d1vgya1 d1r3na1 d2grea2 d1xmba1 d1rtqa\_ d1w52x1 d2ppla1 d1hpla2  
d1lpbb2 d2oxea1 d1bu8a2 d1rp1a2 d1ys1x\_ d4hs9a\_ d1ex9a\_ d1ku0a\_  
d3qmma\_ d1ra6a\_ d1muka\_ d3gsza\_ d1khva\_ d1te9a\_ d2xwha\_ d3uqsa\_  
d3hkwa\_ d3n6ma\_ d2cjqa\_ d2xyma\_ d1teba\_ d1te8a\_ d1u09a1 d4wfxa\_  
d3tyqa\_ d2pgga1 d1gyta2 d1lgya\_ d4l3wa\_ d1llfa\_ d1gz7a\_ d1lukca\_  
d2hqya1 d2hqya2 d1lrza2 d1ne9a1 d1lrza3 d3groa\_ d1pjaa\_ d1ei9a\_  
d1svpa\_ d3su6a1 d1cu1a1 d4agka\_ d1vcpa\_ d1q31a\_ g1n11.1 d3e90b\_  
d1lep5a\_ d3u1jb\_ d3zxha\_ d1cgla\_ d1rm8a\_ d1leaka2 d1hy7a\_ d2jsda\_

d1cxva\_ d1hv5a\_ d1i76a\_ d3p0ya1 d1lgra1 d1lgra2 d1n8yc2 d1n8yc1  
d1m6ba2 d1m6ba1 d1dzka\_ d4tlja\_ d2a2ua\_ d4wfva\_ d3t1da\_ d4iaxa\_  
d3zq3a\_ d2nnda\_ d1i4ua\_ d1kxoa\_ d1bbpa\_ d1kt7a\_ d1lexsa\_ d3s26a1  
d1lf7a\_ d1qfta\_ d4gh7a\_ d1z24a1 d1qabe\_ d1xkia\_ d1lew3a\_ d3bx7a\_  
d4iawa1 d1n0sa\_ d1gkab\_ d3kzaa\_ d2k23a\_ d2l9ca1 d2joza1 d1gm6a\_  
d3kffa\_ d3saoa1 d1e5pa\_ d1yupa1 d1liua\_ d1c8nc\_ d1x36a\_ d1smvc\_  
d1ng0c\_ d4sbvc\_ d1lopa\_ d1f2nc\_ d1cixa\_ d1y29a\_ d1v7fa\_ d2jtba\_  
d1dlha\_ d1g9pa\_ d1qk7a\_ d1mb6a\_ d2a2va\_ d1niya\_ d1i25a\_ d1hvwa\_  
d2mpqa\_ d1ie6a\_ d1kqha\_ d1la4a\_ d2mxoa1 d1dl0a\_ d1koza\_ d1qk6a\_  
d1emxa\_ d1lqra\_ d1c6wa\_ d1js9c\_ d1f15b\_ d1za7a\_ d1laja\_ d1rypd\_  
d1lirua\_ d1rypc\_ d3unfk\_ d1rypa\_ d1j2pa\_ d1lirui\_ d1j2qh\_ d3unfh\_  
d1m4ya\_ d1rypb\_ d1lirul\_ d1lirug\_ d1liru2\_ d1q5rh\_ d1rypg\_ d1g3ka\_  
d1liruf\_ d1q5qa\_ d1e94a\_ d1lirub\_ d1ryph\_ d3ty6a\_ d1liruj\_ d1liruk\_  
d1rype\_ d1lirud\_ d1lirue\_ d3mi01\_ d1rypf\_ d1liruh\_ d2z3ba\_ d1liruc\_  
d3mka2\_ d1liru1\_ d1ny721 d1a6ca3 d1a6ca2 d1a6ca1 d1pgl22 d1pgl21  
d1pgl11 d1ny711 d1mqta\_ d1d4m3\_ d1fmd3\_ d2mev1\_ glaym.1 d1ev13\_  
d4q4w1\_ d1r1a3\_ d2x5ia\_ d1rhi1\_ glr1a.1 gl1d4m.1 glrhi.1 d1b35b\_  
d1lopa\_ d1tme1\_ d4iv1a\_ glpvc.1 glfpn.1 d1fpn1\_ d4gb31\_ d1d4m1\_  
d1fmd1\_ d1ev11\_ d2wzr3\_ d1qqp3\_ glfmd.1 d2x5ic\_ d1rhi3\_ gloop.1  
d1hxs1\_ glhxs.1 d1fpn3\_ d1bev1\_ g2mev.1 d1eah3\_ d1aym1\_ d1pvc3\_  
d1qqp1\_ d1zba3\_ d1h8ta\_ d3vbhc\_ glb35.1 glbev.1 d1hxs3\_ glev1.1  
d1bev3\_ gltmf.1 d1tmf1\_ d1b35a\_ d2mev3\_ gleah.1 glh8t.1 d1eah1\_  
d4q4w3\_ d1r1a1\_ d1aym3\_ d1pvc1\_ d1zba1\_ d1h8tc\_ d1loopc\_ d1tme3\_  
glqqp.1 d4iv1c\_ gltme.1 d1y14b1 d2nn6i1 d1i941\_ d2zjra2 d1smxa\_  
d2qamc2 d1hh2p1 d2r7da1 d1rl2a2 d1wfaq1 d3bzka4 d1x6oa2 d3a0ja\_  
d2j01d2 d2ja9a1 d4q15a\_ d1hr0w\_ d1luza\_ d2n3sa\_ d2vnud1 d1h95a\_  
d1go3e1 d2nn6h1 d1ne3a\_ d2mola\_ d1iz6a2 d1jjga\_ d1e3pa2 d2ix0a3  
d2ix0a2 d2lxja\_ d1ueba3 d1ueba2 d2z0sa1 d1u0la1 d2ix0a1 d2eifa2  
d2je6i1 d3i2za1 d2c35b1 d2ahob2 d1t9ha1 d3i4oa\_ d2qall1 d1jt8a\_  
d2nn6g1 d1g6pa\_ d3cama\_ d1i94q\_ d1c9oa\_ d1d7qa\_ d2ba0a1 d2vnud2  
d2vnud3 d1khia2 d2qalq1 d1wi5a1 d1xtda2 d1ny4a\_ d1eixa\_ d3exra\_  
d2ffca1 d2fdsa1 d3n3ma1 d2czda\_ d2yyua\_ d1vqta1 d1dbta\_ d3ldva1  
d1ux8a\_ d4i0va\_ d2bkma\_ d1dlwa\_ d2bmma\_ d2r80b\_ d1cqa1\_ d1cg5a\_  
d1gcvb\_ d3boma\_ d2h8fb\_ d2raoa\_ d3bj1a\_ d4hrrb\_ d2r50a\_ d3d1kb\_  
d2aalb1 d3zhwa\_ d3hf4b\_ d3gdja\_ d1jebb\_ d3bj1b\_ d1x9fb\_ d1wmub\_  
d1gcva\_ d3bcqb\_ d3d4xb\_ d1gvha1 d2dc3a\_ d3hf4a\_ d4yu3a\_ d3k8ba\_  
d1qpwb\_ d2r80a\_ d3bcqa\_ d1v4wa\_ d3wtgb\_ d1j17a\_ d4esaa\_ d1a9we\_  
d3d1ab\_ d1fsla\_ d4h2la\_ d1v4wb\_ d1mwca\_ d1vhba\_ d1jeba\_ d1spgb\_  
d1h97a\_ d1qlfa\_ d1tu9a1 d3d1aa\_ d1hdsb\_ d3hyub\_ d2zfb\_ d3fs4a\_  
d1oj6a\_ d1shrb\_ d4h2lb\_ d4yu3b\_ d1spga\_ d3hrwa\_ d3qqra\_ d3at5a\_  
d4wchd\_ d3hyua\_ d1cg5b\_ d1uc3a\_ d1hbra\_ d2raob\_ d1outb\_ d4esab\_  
d3gdjb\_ d3qqqa\_ d1x9fc\_ d3vrfa\_ d1litha\_ d3mkba\_ d3d4xa\_ d3mjpa\_  
d1j16a\_ d3fh9a\_ d1outa\_ d2dc3b\_ d1lit2a\_ d3eoka\_ d3g46a\_ d1qpwa\_  
d3vrfb\_ d1ch4a\_ d1x9fd\_ d1hdsa\_ d2zfb\_ d3mkbb\_ d1or4a\_ d3wtga\_

d1a4fa\_ d3fh9b\_ d3bomb\_ d3cy5a\_ d3at5b\_ d1x9fa\_ d2oifa\_ d4lmbx\_  
d1cpcb\_ d3v57a\_ d1kn1a\_ d1cpc\_ d4f0ta\_ d2vjha\_ d4po5b\_ d1eyxa\_  
d1alla\_ d4f0tb\_ d1b33b\_ d1b8db\_ d4h0mb\_ d1b33a\_ d2vjhb\_ d4lmb6\_  
d2vmlb\_ d1allb\_ d2vjta\_ d3dbja\_ d2vmla\_ d2vjtb\_ d4f0ub\_ d1f99b\_  
d4rmpa1 d1liaa\_ d1eyxb\_ d2uulb\_ d4lmsb\_ d4f0ua\_ d2bv8a\_ d1f99a\_  
d2bv8b\_ d2c71b\_ d3dbjb\_ d4rmpb1 d1b8da\_ d4h0ma\_ d3v57b\_ d1kn1b\_  
d1liab\_ d2uula\_ d2j96a\_ d3ia2a\_ d1a88a\_ d4dgqa1 d1hkha\_ d1zoia\_  
d1mtza\_ d1hlga\_ d2xqfa\_ d1ea5a\_ d1f6wa\_ d1dx4a\_ d1qe3a\_ d1k4ya\_  
d4qwwa\_ d2ha2a\_ d2qvba\_ d2v9za\_ d4kafa1 d1pv8a\_ d1w5qa\_ d2c1ha\_  
d1ohla\_ d1l6sa\_ d1xova2 d1f74a\_ d3l21a\_ d2e1da\_ d1to3a1 d1w3ia\_  
d1sfla\_ d1n7ka\_ d1vcva1 d4imea\_ d1wa3a\_ d2ocza1 d1f2ja\_ d3m16a\_  
d2yxga\_ d3a5fa\_ d1fbaa\_ d1l6wa\_ d1xfba1 d1wx0a1 d1vpxa1 d1ojxa\_  
d1mxsa\_ d2a4aa1 d1xkya1 d3cq0a1 d3s1xa\_ d1f05a\_ d1fdja\_ d3cpra1  
d4d2ja\_ d1e88a1 d1l6ja5 d1eaka4 d1eaka3 d1l6ja3 d1h8pa2 d1h8pa1  
d3rp2a\_ g1lucy.1 d1fuja\_ d2zchp\_ d3w94a\_ d1si5h\_ d1l06a\_ g2pka.1  
d1cgha\_ d1kigh\_ d1a5ia\_ d3s9ba\_ d1hj8a\_ d1ao5a\_ d2anya\_ d1q3xa1  
d1gvza\_ d1azza\_ d4gsoa\_ d2f91a1 d1iaua\_ d1gdna\_ d1eufa\_ g1fiw.1  
d1eq9a\_ d4nfea\_ d2rdla\_ d1spja\_ d1elva1 d1a7sa\_ d1lekbb\_ d1pfxc\_  
d1yc0a\_ d2aiqa\_ g1fiz.1 d1fi8a\_ d4k60a\_ d4dgja\_ d1mzaa\_ d1lop0a\_  
d3tjva\_ d1pytd\_ d1sgfg\_ g1gg6.1 d2eeka\_ g1rtf.1 d1a0ja\_ d3g01a\_  
d1pytc\_ d4e7na\_ d1ddja\_ d1z8ga1 d2hlca\_ d1npma\_ d1brup\_ g1jou.1  
d1sgfa\_ d1autc\_ g2hnt.1 g1kdq.1 d3s69a\_ d4crga\_ d1fxya\_ d1bqya\_  
d2ftba\_ d1pmpa\_ d2rcqa1 d1fdqa\_ d4lkpa\_ d1sa8a\_ d1vyfa\_ d1lpja\_  
d3vg7a1 d4azqa1 d5bvqa\_ d1p6pa\_ d2qo4a\_ d1opba\_ d1yiva1 d1o1va\_  
d4bvma1 d4tkba\_ d4i3ba\_ d1bwya\_ d1ftpa\_ d1ggla\_ d4gkca\_ d1cbia\_  
d3p6da1 d1kqwa\_ d2a0aa1 d1m41a\_ d2bk7a\_ d3fjua\_ d1z5ra1 d1kwma1  
d1uwya2 d1jqga1 d2c1ca1 d1h81a2 d1e69a\_ d1mv5a\_ d3g60a4 g1ii8.1  
d1ewqa2 d1ji0a\_ d1qhla\_ d1v43a3 d2wmfa1 d1vpla\_ d1g2912 d4a82a2  
g1f2t.1 d2d62a1 d3tuic1 d2bbsa1 d3g60a3 d2ixea\_ d1g6ha\_ d1sgwa1  
d2qi9c\_ d3rlfa1 d3b60a1 d3d31a2 d2pzea1 g1xew.1 d1jj7a\_ d1oxk2  
d2onka1 d1wlwa\_ d1iwea\_ d1qf5a\_ d1vmaa2 d1nija1 d1np6a\_ d2p67a1  
d3ihla\_ d1okkd2 d1lsla2 d1slma2 d1iona\_ d2v40a\_ d1dj3a\_ d3hida\_  
d2vo1a1 d2g0ta1 d1vcoa2 d1j8mf2 d1g3qa\_ d1xjca\_ d1p9ba\_ d1qzxa3  
d1ihua2 d1ihua1 d2qm8a\_ d1dj2a\_ d4ioja\_ d1cp2a\_ d1yrba2 d3gqba2  
d1skye3 d1xp8a1 d1tf7a2 d1tf7a1 d1ye8a1 d1skyb3 d2qe7d2 d4blta\_  
d4huta\_ d3ltaa2 d4hyya\_ d2i3ba1 d1crla\_ d3j9tb2 d3ntua2 d1vdza1  
d2z43a\_ d1e9ra\_ d1nlfa\_ d3ziaa2 d1n0wa\_ d1g6oa\_ d3ziad2 d3j9ta2  
d1pzna2 d3gqbb2 d2i49a\_ d1nnfa\_ d1xvxa\_ d1ursa\_ d1h3da1 d1iuda\_  
d4m1va1 d1twya\_ d3e13x\_ d2nxoa1 d4pfua\_ d3ttma\_ d1elja\_ d2qmw1  
d1us5a\_ d1y3na1 d1jeta\_ d1uqwa\_ d4f19a1 d2esna2 d3thia\_ d3fasa1  
d2uyeb\_ d2xwva1 d1r91a\_ d2fyia1 d1pb7a\_ d2ozza1 d1sw5a\_ d1nh8a1  
d1vr5a1 d2g29a\_ d1xs5a\_ d3lswa\_ d2z23a\_ d3w9va\_ d3tcha\_ d1q35a\_  
d1z7me1 d3q27a\_ d1p99a\_ d1ve4a1 d2i6ea1 d4mcoa1 d4n8ya\_ d1eu8a\_  
d1zba1 d1hs1a\_ d1ixca2 d1j1na\_ d1xvya\_ d1y9ua\_ d2z22a1 d1xoca1

d4oera\_ d1wdna\_ d5f1qa1 d1xt8a1 d4gwoa\_ d4igta1 d1pc3a\_ d4mmpa1  
d1o63a\_ d2cz1a1 d2onsa2 d4mija1 d4ok5a1 d2bmfa1 d2bmfa2 d1yksa1  
d1yksa2 d2qeqa1 d2j1qa1 d1a1va2 d1eh3a\_ d3skpa\_ d1dtza1 d1dtza2  
d1iej\_ d1jnfa2 d1ce2a1 d1jnfa1 d1b1xa2 d1b1xa1 d1jw1a1 d1jw1a2  
d1ryoa\_ d1h76a1 d1h76a2 d1c4oa1 d2p6ra3 d2p6ra4 dloywa2 dloywa3  
d1wrba1 d1w36b2 d1w36b1 d1c4oa2 d3bora\_ d1t6na\_ d2eyqa5 d2eyqa3  
d2eyqa2 d2zu6a2 d1veca\_ d1uaaa1 d1w36d1 d2g9na1 d1z3ix2 d2rb4a\_  
d1hv8a1 d1hv8a2 d1t5ia\_ d1w36c2 d2j0sa2 d2j0sa1 d1fuka\_ d3hjha1  
d1z5za1 d1qdea\_ d1z63a1 d1s2ma2 d1s2ma1 d1wp9a1 d1wp9a2 d1gm5a3  
d1gm5a4 d3dina4 d3dina3 d1q0ua\_ d1w36c1 d1z3ix1 d1nkta3 d1nkta4  
d1uaaa2 d1w36d2 g1qhh.1 d2fwra2 d2fwra1 d3q3ma\_ d1za0a1 d1mxra\_  
d2inca\_ d1jk0a\_ d2incb\_ d1mhyb\_ d3hf1b\_ d1mtyb\_ d1r2fa\_ d2uw1a\_  
d1mhyd\_ d3n37a\_ d1afra\_ d1oquc\_ d1syya\_ d1mtyd\_ d2o1za\_ d1uzra\_  
d1smsa\_ d2fkza\_ d1zujal d1s3qa1 d2fjca1 d1z6om1 d1veia\_ d4dyya\_  
d1jiga\_ d3gvya\_ d2pyba\_ d4cy9a1 d3bvfa1 d1r03a\_ d2cf7a\_ d1nf4a\_  
d1zs3a1 d4iwka\_ d3ka8a\_ d3np0x\_ d1n1qa\_ d1lb3a\_ d4e6ka\_ d1z6oa1  
d2fzfa1 d4dyua\_ d3ge4a\_ d1jgca\_ d4am4a\_ d2z6ma\_ d1ji5a\_ d1vlga\_  
d1lkoal d1krqa\_ d3qz3a\_ d1o9ra\_ d2ffxj\_ d1euma\_ d1yv1a1 d2v2pa\_  
d1j30a\_ d4di0a\_ d1dpsa\_ d1oewa\_ d2qzxa\_ d2asia\_ d1psoe\_ d1miqa\_  
d1smra\_ d2h6ta\_ d1pfza\_ d1izda\_ d3hd8a\_ d1dpja\_ d4aa9a\_ d1t6ex\_  
g1b5f.1 g1lya.1 g1htr.1 d1qdma2 d1bxoa\_ d1wkra\_ d1tzsa\_ d1libqa\_  
d2qzwa\_ d2v76a\_ d1wj1a1 d1aqca\_ d1qqga2 d1ntva\_ d1n3ha\_ d4dbba\_  
d3f0wa1 d1p3ra\_ d1wgua1 d2cy4a1 d3hqca\_ d1wvha1 d1xr0b1 d1bdqa\_  
d3ggta\_ d3ixoa\_ d1mrxa\_ d2haha\_ d1tw7a\_ d4njsa\_ d1sgua\_ d2p3da\_  
d1nsoa\_ d3d3ta\_ d2rkfa\_ d1c6ya\_ d2rspa\_ d3ogpa\_ d3ekwa\_ d2o4na\_  
d2j9ja\_ d1baia\_ d3ggua\_ d3lzua\_ d4npua\_ d4j55a\_ d2r8na\_ d2fxda\_  
d2p3ca\_ d4dqea\_ d3ttpa\_ d3t3ca\_ d2p3aa\_ d2hc0a\_ d2fdda\_ d3mwsa\_  
d1wgda1 d1wgga1 d4q5eb\_ d1wjna1 d1se9a\_ d3n3kb\_ d1wz0a1 d1we6a1  
d2m0xa\_ d2gbka\_ d3rt3b1 d1wh3a1 d1sifa\_ d2ekek2 d4ii2b1 d4hk2a1  
d1c3ta\_ d1m94a\_ d1wgha1 d1ttna1 d1j8ca\_ d1wx8a1 d3v6cb1 d2ma9b\_  
d4i61b1 d2jvca1 d1iyfa\_ d2k1fa\_ d1wxva1 d1wf9a1 d1t0ya\_ d2io0b2  
d1x1ma1 d2gbma\_ d1zw7a1 d2m17a\_ d1ud7a\_ d1we7a1 d2lwpa\_ d2gbja\_  
d1wjua1 d1v6ea1 d1v86a1 d4eewa\_ d1wiaa1 d4icva\_ d4gu2a\_ d1wx7a1  
d1wy8a1 d4hjka1 d2faza1 d1v5oa1 d3ruib\_ d3waob\_ d2r2qa1 d3m95a\_  
d3wana\_ d2a13a1 d2cr5a1 d1wj4a1 d1yvca1 d1yeza1 d4wfia\_ d4cg1a1  
d3visa\_ d1iyka2 d1iyka1 d1rxta1 d1iica1 d1dszb\_ d1a6ya\_ d3cbba\_  
d1ynwa1 d1r4ia\_ d1hcqa\_ d2hana\_ d2hanb\_ d2enva1 d1kb4b\_ d2n11b\_  
d1lola\_ d1cita\_ d1um8a\_ d1lixza\_ d1qvra2 d1qvra3 d1qzma\_ d1sxjc2  
d1jr3d2 d2p65a\_ d1l8qa2 d3hu3a3 d1sxjd2 d1njfa\_ d1in4a2 d1sxja2  
d1tuea1 d2ce7a2 d1w5sa2 d1sxjb2 d1d2na\_ d1ny5a2 d1ofha\_ d2gnoa2  
d2a5yb3 d1fnna2 d1u0ja1 d1lv7a\_ d1iqpa2 d2fnna2 d1ixsb2 d4gita\_  
d1sxje2 d1g41a\_ d2e3fa\_ d1mm0a\_ d2e3ea\_ d2llda\_ d2ny8x\_ d2e3ga\_  
d2ny9x\_ d2nz3a\_ d2l1j7a\_ d1n4na\_ d2m8bb1 d2kyqa\_ d3psma\_ d1jkza\_  
d1jxca\_ d2g11a\_ d1ugla\_ d4uj0a\_ d2k4ua\_ d1hp2a\_ d2lu9a\_ d1baha\_

d2meoa1 d1wm7a\_ d1hlya\_ d1n8ma\_ d1jlza\_ d1wpda\_ d1c55a\_ d1pvza\_  
d1wt7a\_ d1rjia\_ d1wz5a\_ d1m2sa\_ d1pjva\_ d1c49a\_ d1qkya\_ d2ktca1  
d1wmta\_ d1du9a\_ d1j5ja\_ d1r1ga\_ d1e3oc2 d1ic8a2 d1t0za\_ d2i61a\_  
d1t1ta\_ d1sn4a\_ d1kv0a\_ d21kba\_ d1npia\_ d1wwna\_ d1pe4a\_ d2kbka\_  
d21i7a\_ d1djta\_ d2kbha\_ d1dq7a\_ d1sega\_ d1omya\_ d1zywa1 d1jzaa\_  
d1n9wa1 d1bbua1 d1e1oa1 d1b8aa1 d1l0wa1 d3a74a1 d1eova1 d1t61c1  
d1iyjb4 d1iyjb5 d1iyjb3 d1o7ia\_ d4ipca1 d1x3ea\_ d4apva\_ d1jb7a1  
d1jb7a2 d1jb7a3 d3kdfa\_ d1ue1b\_ d1wjja1 d3eiva\_ d1xjva2 d1xjva1  
d2ccza2 d1se8a\_ d1l1oc\_ d1jb7b\_ d1qvca\_ d3ulla\_ d1qzga\_ d1miau4  
d1miau5 d1miau3 d3g48a1 d1gd7a\_ d1mkha\_ d1jjcb3 d1pyba\_ d3ubub\_  
d1legia\_ d1v7pa\_ d1tdqb\_ d3ubua\_ d1c3ab\_ d1h8ua\_ d3bx4b\_ d1t8ca1  
d1sb2a1 d1qdda\_ d2ziba1 d3cada\_ d1byfa\_ d1j34b\_ d1jwia\_ d1jna\_  
d1c3aa\_ d1oz7b\_ d1wmza\_ d3bdwb\_ d1hq8a\_ d1fifa1 d1dv8a\_ d3hupa\_  
d1wk1a1 d1umra\_ d2afpa\_ d3bx4a\_ d1gz2a\_ d1sl6a\_ d1v7pb\_ d3g8ka\_  
d1ixxa\_ d1j34a\_ d1jwib\_ d1g1sa1 d1y17a1 d1ja3a\_ d1fvub\_ d3bdwa\_  
d1sb2b1 d1fvua\_ d1umrc\_ d1oz7a\_ d4m17a\_ d3cfwa1 d1ypqa1 d1glta1  
d3fd4a\_ d3l9jc\_ d4dn8a1 d1v41b\_ d1rd11\_ d2msba\_ d1dgsa2 d1fvial  
d1p16a1 d1x9na2 d2shpa1 d1yfoa\_ d1l8ka\_ d2ooqa1 d1g4us2 d1p15a\_  
d1lara2 d1lara1 d1wcha\_ d2fh7a2 d2fh7a1 d1ohea2 d2f4da\_ d1rxda\_  
d2hxpa\_ d1xria\_ d1d5ra2 d1fpza\_ d3ezza\_ d4y2ea\_ d1i9sa\_ d1tdha3  
d1q3ba3 d1ee8a3 d1k82a3 d3ubra\_ d1qo8a1 d1d4ca1 d2k3va\_ d1ft5a\_  
d1qdba\_ d1m1qa\_ d2j7aa\_ d1h21a\_ d1ogyb\_ d4fasa\_ d1jnia\_ d1sp3a\_  
d3h33a\_ d1rwja\_ d19hca\_ d1os6a\_ d3bxua\_ d3h4na\_ d1i77a\_ d3caoa\_  
d1j0pa\_ d2ctha\_ d1duwa\_ d1ofwa\_ d2e84a\_ d1hh5a\_ d3h34a\_ d1wioa4  
d1ccza2 d1vcaa1 d1dr9a2 d1ic1a1 d2d9qb1 d2nxyb2 d1adqa1 d1fnga1  
d1uvqb1 d1zs8a1 d2vola1 d2vola2 d1mfb12 d2jelh2 d1uwel2 d3qq4b1  
d1kjob\_ d1k5na1 d1osph2 d4odh12 d1ow0a1 d1ow0a2 d1bfob2 d3l9ra2  
d3jtt1 d2fath2 d4elkb2 d1fn4b2 d2xfxb\_ d1pg7x2 d1cqka\_ d4k71b2  
d1lk2a1 d1eapb2 d4lfhg2 d1i4fa1 d2nw2a2 d1kfah2 d1mhca1 d1h3ua1  
d1wejh2 d1h0db2 d1a5fh2 d1kcvh2 d1mjuh2 d1qqda1 d1kcrh2 d1k8ia1  
d3huja2 d2nnab1 d1nfd2 d3mffb2 d1s9va1 d1lk3h2 d1q0x12 d1fv1b1  
d1neza1 d4rfeb2 d1r3ha1 d1a6tb2 d1kjva1 d1pz5b2 d1onqa1 d2bc4a2  
d1de4a1 d1k8da1 d1tcra2 d1dn0b2 d1nfd2 d2xwtb2 d1bfoa2 d1mexh2  
d1iakb1 d1ypzf2 d4f7ea2 d1q7212 d2fbjh2 d1fe8h2 d1clzh2 d1fngb1  
d1uvqa1 d1vgka1 d1c16a1 d4j12a2 d4x99b2 d1igtb3 d1je6a1 d1q72h2  
d1nldh2 d1teth2 d2hmic2 d1ilca2 d1ilca1 d1k8ib1 d1q0yh2 d1kfa12  
d3frua1 d1pg7w2 d1u58a1 d1igyb4 d1igyb3 d1hyrc1 d1klub1 d1deeb2  
d1c12b2 d2bc4b2 d2ig2h2 d1kcv12 d3wn5b1 d1lk2b\_ d1lk312 d1mjul2  
d1sm3h2 d1q0xh2 d1zvsal d1ydpal d1u8ib2 d1ypze2 d1kcuh2 d1op9a\_  
d1y0la1 d1etzb1 d1egj11 d2gsib1 d1nj9a1 d4jfhd1 d1aqk11 d1t2ja\_  
d1l04h1 d1zvya1 d3v4v11 d4enec1 d1kxtb\_ d5e8ea1 d2pxya\_ d4weud\_  
d1xiwc\_ d2esvd1 d1qnzh\_ d1ogae1 d1f4xh1 d4n1hb\_ d3ezjb1 d3mlw11  
d1kfah1 d1etza1 d1b4jh1 d3cfic\_ d4w68a\_ d2arja1 d1ek3a\_ d2ok011  
d1vera\_ d1uwgh1 d1blnb1 d1fpth1 d1rzga1 d2giya1 d4m3kb1 d1nc2a1

d2nyyd1 d1ncna\_ d1fbih1 d5dxwa\_ d4fqqa1 d1dqdh1 d1jfq11 d1kelh1  
d1faih1 d1frgl1 d1figl1 d4m6n11 d1fo0a\_ d4hxb11 d3b5ga\_ d3quyd1  
d2h9gb1 d1i8kb\_ d2dd8h1 d2ck0h1 d1lea\_ d4w6wb1 d2a6ib3 d1t66d1  
d2e27h\_ d1ob1b1 d1f11b1 d2v7na1 d1ad0a1 d2xt1b1 d1pskh1 d4i13b1  
d2op4l1 d1a0q11 d1uwell1 d1za3a1 d1ncb11 d4uu9a\_ d1bm3h1 d1cloh1  
d1nqba2 d1cf8h1 d4y5va\_ d1mhph1 d5anma1 d4cdgc1 d4ldeb\_ d1y01b1  
d2pcpb1 d1z3gl1 d1dfb11 d1fh5h1 d3g5xa1 d1tzib1 d4dn3l1 d3zhka1  
d2b1hh1 d2uyla1 d1f3dh1 d1nj9b1 d2agjh1 d2h1p11 d1q72h1 d8fabb1  
d1ndmb1 d1rjca1 d4u6hb1 d3upca\_ d2fbj11 d1osph1 d1tvda\_ d2cjh\_  
d4fhbd1 d1bd2d1 d1rz7h1 d3nn8a\_ d1blna1 d1knoa1 d1nfda1 d2bmkb1  
d1dq11\_ d1igyb1 d1igf11 d1e8h1 d3utza1 d1nc2b1 d1rihh1 d4mwfb1  
d4jvpa1 d1mieh1 d1rhfa1 d1fgn11 d1sbsh1 d1lp9e1 d1dn0a1 d4lqf11  
d1iaih1 d1kgcd1 d1mh5b1 d1gpol1 d2g60h3 d1f8t11 d2jixd1 d4grwh\_  
d1fo0b\_ d1bfob1 d1axsa1 d1u9ka\_ d1nmbh\_ d1h8na1 d1h8na2 d1jguh1  
d4eura1 d3sdy11 d35c8h1 d1w72l1 d1mvub\_ d1i9rh1 d1ob1a1 d4wenb\_  
d1yeeh1 d3ietc1 d1f58h1 d1ad0b1 d1mqk1\_ d1nbvh1 d4b50a\_ d3r8bb\_  
d1baf11 d1mamh1 d4rgne1 d2gsgb\_ d35c8l1 d1bafh1 d1ailh1 d2pcpa1  
d2fath1 d2x1pa\_ d1orsb1 d1libgl1 d1shma\_ d1a2yb\_ d1u0qa\_ d2coqa\_  
d1hilb1 d1qfwi\_ d1jv5b\_ d1fn4b1 d5e0qa\_ d1nsnh1 d1plgl1 d4ocx11  
d1kb5h1 d1rzfh1 d1pg7x1 d2fx7h1 d2oi9c\_ d1l7i11 d3eyva1 d1d5i11  
d4ffyl\_ d1tet11 d1a6wh\_ d1ac6a\_ d3dvfa\_ d1nfde1 d1mimh1 d1ri8a1  
d1jhlh\_ d3dura\_ d1fskb1 d1f97a1 d3so3b1 d2ak4d1 d1lp9f1 d4z7wf1  
d1l7th1 d4y5ya\_ d4x7ec1 d1emth1 d1ikf11 d1nlbh1 d4utal1 d1bjma1  
d1eapb1 d1u6ah1 d2dtgd1 d1kj2b\_ d1xeda1 d1c1eh1 d1fgvh\_ d2bnub1  
d2fb4h1 d2dtgb1 d1ktrh\_ d1jpth1 d1qkz11 d4hepg\_ d2atpb1 d1flrh1  
d2hrpl1 d1mvfa\_ d1iaim1 d3k80a1 d2jb5h1 d3zkxc\_ d4grwe\_ d1it9h1  
d1rhhb1 d3w9ec\_ d1e4wh1 d1sy6h1 d2j6eh1 d3qxta\_ d1jglh1 d1p7ka1  
d1tzhb1 d4n8pa1 d1gaf11 d2jelh1 d1wioa2 d4i0cc1 d1cicb1 d1lmka2  
d1lmka1 d1iqwh1 d1orqb1 d1ejoh1 d1jnlh1 d4zgl1\_ d43c9b\_ d1wejh1  
d3q6fa1 d1f3dj1 d3c6la1 d1bqlh1 d3p9wb\_ d1a3r11 d1h0db1 d2uzi1\_  
d1eo8l1 d1qfw1\_ d1n7ml1 d1igja1 d1c5ch1 d2a9mh\_ d1rmfh1 d1fj1b1  
d4heme\_ d1ccza1 d1a5fh1 d1ogad1 d1dlfh\_ d1qa9b\_ d1vgel1 d3qskb\_  
d1sjxa\_ d4ozfg1 d1sq2n\_ d1qd0a\_ d1kcvh1 d1c5db1 d3qcul1 d8faba1  
d3bn9d1 d1mjuh1 d4y8dc\_ d7fabh1 d3dvgb1 d1lo0l1 d1a6tb1 d1gigh1  
d1kcrh1 d2hwz11 d1yjdc1 d3clfl1 d4krna\_ d1dl7l\_ d1e6ol1 d1mexh1  
d3r0ma\_ d4kkna\_ d1fns11 d1loaqh\_ d1rzia1 d1ucbh1 d1ncw11 d4b41a\_  
d1nfdfl1 d2mpah1 d2d7tl1 d4grwf\_ d4b5ea\_ d1lk3h1 d3u79a\_ d4u3xa\_  
d1ghfl1 d1bvkb\_ d1mcww1 d1b88a\_ d1jrhh1 d32c2b1 d4wemb\_ d1dsfh\_  
d1op3h1 d1ce1l1 d1iqda1 d1qoka1 d1qoka2 d1qfuh1 d2crya1 d1ay1h1  
d1loaq1\_ d3ab0b\_ d1rur11 d1t4kb1 d1bz7b1 d1n0xh1 d1for11 d1ucb11  
d4w6yb\_ d43c9a\_ d2aabl1 d1tzia1 d4n1ca\_ d1k6qh1 d3g9ab\_ d4tvsa1  
d1ligmh\_ d1pz5b1 d3dx9a1 d3wxwh\_ d1nakh1 d1kcul1 d3eaka\_ d4qlra1  
d1cr9l1 d1d9ka\_ d1f4x11 d1deea1 d2i27n2 d1c12a1 d2orb11 d1j8hd1  
d1mcp11 d1c5da1 d1kenh1 d1bd2e1 d1h5ba\_ d4x7fc1 d3upaa\_ d1t3fa1

d1indh1 d2dtgc1 d4hc1l11 d1zv5a1 d4wgvb\_ dluwgl1 d4f37k1 d1aqkh1  
d1vesa\_ d3zkqd\_ d1fptl1 d1lo4l1 d1knob1 d3rrqa\_ d1ct8b1 d4orz\_ c\_  
d1mlbb1 d4hgkc1 d1dqdl1 d1bogb1 d4ozhe1 d1dr9a1 d1i7za1 d1dn0b1  
d1kell1 d1rzib1 d1ypzfl d1wtla\_ d1hkfa\_ d1fail1 d1figh1 d2vyre\_  
d1sjva\_ d1ohqa\_ d1bfoa1 d1pkqb1 d1mju11 d1b4jl1 d1nsn11 d2arjb1  
d1p4bh\_ d4aj0a\_ d3nn8b\_ d2rcja1 d1f2xk\_ d4v1dd\_ d1adqh1 d2eksa\_  
d4k3ga\_ d1jfqh1 d1uweh1 d1frgh1 d4gftb\_ d1uz8b1 d4nlea\_ d1bm3l1  
d1clo11 d3mcka1 d2vq1a1 d1ae6h1 d4aq1b1 d1uj3b1 d1nbqa1 d1fh5l1  
d2ck0l1 d2ywza\_ d1q72l1 d4nxbx\_ d1hila1 d4hzl1b1 d2j88l1 d1zmya1  
d1cd0a\_ d1a4ka1 d1psk11 d1a0qh1 d4krmb\_ d1ncbh1 d2fbjh1 d1j8he1  
d1i3ua\_ d1cf8l1 d1fe8h1 d2p1ya1 d1eeqa\_ d2x89a\_ d1o10a\_ d2r0lh1  
d1ub5a1 d1dfbh1 d3eyvb1 d4jdvb1 d4p2cg\_ d2gsia1 d2agjl1 d1u3ha1  
d2h1ph1 d1rih11 d1fskc1 d1boga1 d2a77l1 d1ospl1 d1qfoa\_ d3dwta\_  
d2fx7l1 d1rz7l1 d3stba1 d1pkqa1 d1b6da1 d1dzba2 d1dzba1 d1kj2a\_  
d4l1ha\_ d1rzgb1 d1dq1h\_ d12e8l1 d1mie11 d1jmaa\_ d1sbs11 d1fgnh1  
d1f58l1 d1mqkh\_ d1ndgb1 d3qegl1 d1iail1 d2aw2a1 d1tqbc1 d3fo2a1  
d4dkaa\_ d1f8th1 d2g60l1 d2ywya\_ d1uj3a1 d1yc7a\_ d3bd3a\_ d4w6xb1  
d1nmb1\_ d1i8ka\_ d1rjlb1 d1ypze1 d1p7kb1 d1kxqe\_ d1gpoh1 d2z4qa1  
d1w72h1 d1i9r11 d4qgya1 d4xt1c\_ d2qqnh1 d1cica1 d3c08h1 d2cd0a\_  
d2bdnh1 d1hnga1 d1mam11 d1nldh1 d1cr9h1 d4lcih1 d3bkyh1 d3qg7l1  
d1ai1l1 d1kxvc\_ d4iosd\_ d1l7ih1 d2x1qa\_ d1ub6b1 d3k74b\_ d1ibgh1  
d1teth1 d1igya1 d1hxma1 d2x6ma\_ d2e7la\_ d5e03a\_ d1qfwm\_ d2r0kh1  
d1igjb1 d1rurh1 d1plgh1 d1mj8h1 d1yuhb1 d3fmg11 d1rzfl1 d1emt11  
d1ad9b1 d1igtb1 d1nlb11 d1d5ih1 d3k7ua\_ d4ffyh\_ d1bwwa\_ d3dvga1  
d1a6ta1 d1fgvl\_ d4qxgl1 d1mim11 d1jh11\_ d2hffb1 d2hh0l1 d1qkzh1  
d1l7tl1 d1afvh1 d1iaii1 d2cjuh\_ d1um5h1 d2ghwb2 d2ghwb1 d1kgce1  
d2fgwh1 d1ikfh1 d1dvfd\_ d2i24n1 d2xtjb\_ d1za3b1 d2yc1a\_ d2hh0h1  
d2x1oa\_ d1bvka\_ d1rjla1 d5e7ba1 d1igta1 d1il1b1 d2fb4l1 d1mvua\_  
d1jpt11 d32c2a1 d1fvca\_ d1iqdb1 d2hrph1 d2p4ab\_ d4qo1a\_ d1p2cb1  
d1wt5c\_ d1t4ka1 d5c1mb\_ d1it9l1 d1bz7a1 d1b2wh1 d1e4wl1 d1jnl11  
d1yedb1 d1za6b1 d3u7aa\_ d1igfh1 d3gnml1 d1orsa1 d1wejl1 d1a2ya\_  
d1hxmb1 d1gafh1 d2j4wh1 d1pz5a1 d1j05a\_ d1a3rh1 d4fq1l1 d1qfwh\_  
d1eo8h1 d1n7mh1 d4s11a\_ d1kegh1 d5da4a\_ d1iqw11 d3whxb1 d1vgeh1  
d1deeb1 d1c12b1 d1t2ql1 d1ad9a1 d3gsnb1 d3b2uc1 d1ggbh1 d1t3fb1  
d1nak11 d4ocmc\_ d1lila1 d2v7hb3 d2esve1 d1mcoh1 d2qr0b1 d2q3aa\_  
d1ct8a1 d1kcr11 d2pxyb\_ d2uzih\_ d5c3ld\_ d3durb\_ d1c5c11 d2ak4e1  
d1d17h\_ d1xiwd\_ d1mlba1 d1rmfl1 d1i7zb1 d1dlfl\_ d2xa3a\_ d5bq7b1  
d1dqqb1 d3h42l1 d1legjh1 d1kcv11 d1fe8l1 d2j6e11 d1f3rb2 d1lk3l1  
d1sm3h1 d1q0xh1 d1ghfh1 d7fabl1 d1igch1 d1lo0h1 d4idla\_ d5c2bl\_  
d1jrh11 d1il1a1 d3zhda1 d4kfzc\_ d1b0wa\_ d1e6oh1 d1mex11 d4krpb\_  
d1fnsh1 d1ncwh1 d4hgma\_ d4eigb1 d4rzca\_ d2mpa11 d4y5xa\_ d5en2b1  
d3lrga1 d4ej1c1 d1rhha1 d1j05b\_ d1forh1 d1q9wb1 d2wzpd\_ d2aq2a1  
d1h0da1 d3revb1 d2ij0c1 d1tzha1 d4m7j11 d1k6ql1 d3b9kc1 d1igml\_  
d3qeua1 d1dsfl\_ d1celh1 d1kcu11 d1zvha1 d1zvoa1 d1tqbb1 d1ay1l1

d2qsc11 d2cgrh1 d1n10h1 d1ken11 d3eo0a1 d4n9ob1 d1n0x11 d3k1kc\_  
d2cqva1 d1fhga\_ d2k1ma\_ d2d12a1 d1biha3 d1biha1 d1biha4 d3qp3a1  
d1glca\_ d1gxea\_ d1cvsc2 d1cvsc1 d1xmwa2 d1m4ka2 d2otpa2 d1biha2  
d1rhfa2 d2fcba2 d2fcba1 d1wwbx\_ d1gsma2 d1lepfa1 d1lepfa2 d2dava1  
d1waaa\_ d1f97a2 d1x44a1 d1vcaa2 d1fnla2 d1fnla1 d3b5ha2 d3h8na2  
d3h8na1 d1jbja1 d1jbja2 d1pd6a\_ d1f2qa2 d1f2qa1 d3cx2a\_ d1nbqa2  
d3b5ha1 d1n26a1 d1xiwb\_ d1xaua\_ d1fltx\_ d2ifga1 d1olla1 d1olla2  
d1cs6a4 d1cs6a3 d1cs6a2 d1cs6a1 d2gw5a2 d1sy6a1 d1xiwa\_ d1ucta2  
d1ucta1 d1ry7b2 d1gl4b\_ d1qz1a3 d1olza1 d2c9aa1 d1wwca\_ d2aq2b1  
d1ck1a1 d1enfa1 d1i4pa1 d1v1oa1 d1et9a1 d1esfa1 d2g9hd1 d4ohja1  
d1klud1 d1bxta1 d1ty0a1 d1fnua1 d1c4qa\_ d2wv6d\_ d1prtf\_ d1ltrd\_  
d4163b1 d1r4pb\_ d1prtd\_ d1tl0f\_ d2bosa\_ d1prtb1 d3chbd\_

**Family-26 (b.29.1.11)**

**Positive dataset contains 8 protein sequences.**

d2nqya\_ d3b7ma\_ d4h7ma1 d3wp3a\_ d2vgda\_ d3zsea\_ d3wx5a\_ d4ix1a1

**Negative dataset contains 3978 protein sequences.**

d1xfda2 d1m32a\_ d1libja\_ d1c7na\_ d1iuga\_ d4q75a\_ d2bkwa1 d1t3ia\_  
d1n8pa\_ d1qz9a\_ d1jff9a\_ d1leg5a\_ d1p3wa\_ d3kgwa\_ d2ctza1 d1vjoa\_  
d2rfva\_ d1gc0a\_ d1cs1a\_ d1d2fa\_ d2ch1a1 d1qgna\_ d1pffa\_ d1elua\_  
d1u08a\_ d1lc5a\_ d1b5pa\_ d2ay1a\_ d1bw0a\_ d3pd6a\_ d7aata\_ d2csta\_  
d1j32a\_ d1fg7a\_ d4wlha\_ d1o4sa\_ d1v2da\_ d1gdea\_ d1m6sa\_ d1v72a1  
d1svva\_ d1ajsa\_ d1wsta1 d2f8ja2 d1lk9a\_ d1vp4a1 d1xi9a1 d2gb3a1  
d1yaaa\_ d3i2ka1 d1lnsa3 d1mpxa2 d2cfba1 d1dfoa\_ d1o69a\_ d1bj4a\_  
d3k28a\_ d2bwpa\_ d3lg0a\_ d2fnua\_ d3ou5a\_ d1z7da1 d1b9ha\_ d1iaya\_  
d4msoa\_ d1bs0a\_ d1s0aa\_ d1sffa\_ d3tqxa\_ d1mdoa\_ d3qboa\_ d3pgya\_  
d1bjna\_ d2dkja\_ d1ejia\_ d1vefa1 d4wxga\_ d3bs8a\_ d3gbxa1 d1w23a\_  
d2b5aa1 d2ofya1 d4mcxa\_ d2xi8a\_ d2icta\_ d2bnma1 d2ppxa1 d1y7ya1  
d1ddla\_ d1e57b\_ d1f56a\_ d1bypa\_ d1azca\_ d1ws8a\_ d3u25a\_ d1cuoa\_  
d1id2a\_ d1rkra\_ d2iaac\_ d4dp1x\_ d1nwpa\_ d2gima\_ d2i7sa\_ d1qhqa\_  
d1gyca3 d1hfua2 d1kbva1 d1kbva2 d1sdda1 d1sdda2 d1gyca1 d1gyca2  
d1mzya1 d2bw4a1 d1aoza1 d1aoza3 d1aoza2 d1kyaa2 d1kyaa3 d1kyaa1  
d1mzya2 d4e9sa1 d1sddb1 d1sddb2 d1hfua1 d1hfua3 d1oe1a2 d1oe1a1  
d1v10a2 d1v10a3 d1v10a1 g1gk9.1 g1or0.1 g1e3a.1 d1iknc\_ d3brda1  
d1p7h11 d1oy3c\_ d1imhc1 d1gjia1 d1zk9a1 d2cxka1 d2h0va\_ d1adqa1  
d1fnga1 d1uvqb1 d1zs8a1 d2vola1 d2vola2 d1mfb12 d2jelh2 d1uwel2  
d3qq4b1 d1kjvb\_ d1k5na1 d1osph2 d4odh12 d1ow0a1 d1ow0a2 d1bfob2  
d3l9ra2 d3jtth1 d2fath2 d4elkb2 d1fn4b2 d2xfxb\_ d1pg7x2 d1cqka\_  
d4k71b2 d1lk2a1 d1eapb2 d4lfhg2 d1i4fa1 d2nw2a2 d1kfah2 d1mhca1  
d1h3ua1 d1wejh2 d1h0db2 d1a5fh2 d1kcvh2 d1mjuh2 d1qqda1 d1kcrh2  
d1k8ia1 d3huja2 d2nnab1 d1nfd2 d3mffb2 d1s9va1 d1lk3h2 d1q0xl2  
d1fv1b1 d1neza1 d4rfeb2 d1r3ha1 d1a6tb2 d1kjva1 d1pz5b2 d1onqa1  
d2bc4a2 d1de4a1 d1k8da1 d1tcra2 d1dn0b2 d1nfde2 d2xwtb2 d1bfoa2  
d1mexh2 d1iakb1 d1ypzf2 d4f7ea2 d1q7212 d2fbjh2 d1fe8h2 d1clzh2  
d1fngb1 d1uvqa1 d1vgka1 d1c16a1 d4j12a2 d4x99b2 d1igtb3 d1je6a1



d1q72h2 d1nldh2 d1teth2 d2hmic2 d1l1ca2 d1l1ca1 d1k8ib1 d1q0yh2  
d1kfal2 d3frua1 d1pg7w2 d1u58a1 d1igyb4 d1igyb3 d1hyrc1 d1klub1  
d1deeb2 d1c12b2 d2bc4b2 d2ig2h2 d1kcvl2 d3wn5b1 d11k2b\_ d11k3l2  
d1mjul2 d1sm3h2 d1q0xh2 d1zvsal d1ydpal d1u8ib2 d1ypze2 d1kcuh2  
d4alac\_ d1rera1 d1s6na\_ d3uzqb\_ d2phla2 d2phla1 d1fxza2 d1fxza1  
d1uija1 g1dgw.1 d2v09a\_ d1uika2 d1uika1 d1dgwa\_ d1lep0a\_ d2pa7a1  
d1wlta1 d1nxma\_ d2c0za1 d1ktja\_ d1lex0a1 d3us3a3 d3us3a1 d4mh8a\_  
d1mu2a2 d4i7ga1 d2bjca1 d2hsga1 d1qpza1 d1efaa1 d1ydw2 d2nvwa2  
d1zh8a2 d1qkia2 d1xeaa2 d1tlta2 d1r0ka3 d1j5pa3 d1vkoa2 d1vm6a2  
d3qvsa2 d1gr0a2 d2ovga\_ d1sq8a\_ d1rzsa\_ d3kz3a\_ d3orca\_ d3gpdg2  
d2q49a2 d1hdgo2 d2g17a2 d2cvoa2 d2czca1 d3pwka2 d1lobfo2 d1i32a2  
d1zyao2 d2pkqo2 d1b7go2 d2hjsa2 d1cf2o2 d1vkna2 d1nvm2 d4lt9a1  
d3tc7a1 d3hoja\_ d1i4na\_ d3vnda\_ d3n18a1 d3naval d1v5xa\_ d4a2ra1  
d3tc6a1 d1ujpa\_ d4ijba\_ d1xcfa\_ d1vc4a\_ d1rd5a\_ d1qopa\_ d3b5va\_  
d2msya\_ d2djoa1 d2r5za\_ d1au7a1 d1f43a\_ d2lmda1 d1akhb\_ d1s7ea1  
d3nara\_ d1zq3p1 d2craa1 d1mija\_ d4uuta\_ d3a01a\_ d1x58a1 d3rkqa1  
d3cmya1 d2cqxa1 d2da6a1 d1e3oc1 d1fjla\_ d1mh3a1 d1ig7a\_ d1x41a1  
d1wh7a1 d1gt0c1 d2mw8a\_ d1lfup\_ d1x2ma1 d1b72a\_ d1wi3a1 d1wjha1  
d1x2na1 d1mnm\_ d2cuea1 d3k2aa\_ d2hosa\_ d2jwta2 d1pufa\_ d1octc1  
d2hi3a\_ d1b8ia\_ d4j19a\_ d3lnqa\_ d1wh5a1 d1b8ib\_ d1fexa\_ d2cqra1  
d1guua\_ d1ug2a1 d2cqqa1 d2ajea1 d4a69c\_ d1h8ac1 d2crga1 d2iw5b1  
d1xc5a1 d2cu7a1 d1wgxa1 d2cjja1 d2ckxa1 d1gvda\_ d1hcra\_ d1tc3c\_  
d1gdtal d1u78a2 d6paxa1 d6paxa2 d1k78a2 d2iu5a1 d1zk8a1 d2g7sa1  
d2fd5a1 d2np5a1 d1z0xa1 d2id6a1 d2d6ya1 d2i10a1 d1vi0a1 d2oi8a1  
d3c07a1 d2ns7a1 d2fq4a1 d2yvea1 d1t33a1 d2o7ta1 d1rkta1 d2np3b1  
d2g7ga1 d2gena1 d2fbqa1 d2g7la1 d2gfna1 d2g3ba1 d2jj7a1 d2hyja1  
d1sgma1 d1ui5a1 d2hkua1 d2id3a1 d4jyka1 d1b10a2 d1d5ya1 d1d5ya2  
d3lv8a\_ d1s3ga1 d1zaka1 d1s4qa\_ d3tvta2 d1uf9a\_ d1khta\_ d1ckea\_  
d1osna\_ d1p5zb\_ d4tmka\_ d3cm0a\_ d1jaga\_ d3h86a\_ d1t0hb\_ d1nn5a\_  
d2h92a\_ d3kb2a1 d2c95a1 d1yj5a2 d1kgda\_ d1ly1a\_ d2ak3a1 d1vyva2  
d1deka\_ d2grja1 d1p3ja1 d1y63a\_ d1e4ya1 d1s96a\_ d3iija1 d1lvga\_  
d1nksa\_ d1vyua2 d4e22a\_ d1qf9a\_ d1jjva\_ d1q3ta\_ d1ki9a\_ d1lw7a2  
d1teva\_ d1kjwa2 d1gsia\_ d2iyva2 d1viaa\_ d1e6ca\_ d1z0ja1 d3umra2  
d3gj0a1 d2gaoa1 d1yzga1 d1x3sa1 d1g7sa4 d1puja\_ d1udxa2 d1kk1a3  
d2o52a\_ d1jwyb\_ d1zcaa2 d1zcba2 d2fv8a1 d2cjwa\_ d3dz8a1 d1xzpa2  
d1vg8a\_ d4qxaa\_ d2ew1a1 d1x1ra1 d2bcgy\_ d3doea1 d3cona\_ d3rega\_  
d3wyga\_ d1upta\_ d2b6ha1 d1zd9a1 d1r5ba3 d1n0ua2 d1r2qa\_ d2f9la1  
d2rhda\_ d3q3jb\_ d3q85a\_ d1efma1 d1r8qa\_ d2gf9a1 d2akab1 d1ek0a\_  
d1z08a1 d2gcoa1 d2dyla2 d4g01b\_ d2cxxa1 d1svia\_ d3q72a\_ d1ni3a1  
d4ac9a4 d2erxa1 d2bmea\_ d1wxqa1 d2gf0a1 d4ldja1 d1zunb3 d1d5ca\_  
d4lv5b\_ d1efca3 d1kmqa\_ d2g6ba1 d3lrpa\_ d1tada2 d2y8ea\_ d4rd4a1  
d1z06a1 d2heia\_ d3a58b\_ d1u0la2 d1d2ea3 d1zj6a1 d2ocba\_ d3rwoa\_  
d1mr3f\_ d2e9sa1 d4u5xa1 d2iwra\_ d2fn4a1 d3bwdd\_ d2nzja1 d2atva1  
d2ksqa\_ d3l43a\_ d1mkya2 d1mkya1 d1wmsa\_ d1jnya3 d2rmka\_ d1f6ba\_

d1f60a3 d1gota2 d1jala1 d2fh5b1 d1g16a\_ d2wblc\_ d1m7ba\_ d1wf3a1  
d1f5na2 d1t9ha2 d1z6xa1 d1z0aa1 d2fg5a1 d2a5ja1 d2bcjq2 d1s0ua3  
d1ky3a\_ d4y0va\_ d4lhwa\_ d2qmea1 d2atxa1 d1egaa1 d1ryha\_ d1moza\_  
d1nrjb\_ d2erya1 d3bfka\_ d1puia\_ d1fzqa\_ d3j3az1 d3t5ga\_ d1shza2  
d3defa\_ d2f7sa1 d3raba\_ d3tsoa\_ d3aq4a\_ d2a17a1 d3sfva1 d3bc1a\_  
d2ncda\_ d1sdma\_ d3h4sa1 d2heha\_ d2grya\_ g3kin.1 d1kk8a2 d1br2a2  
d1goja\_ d1f9va\_ d2mysa2 d1lkxa\_ d3t0qa\_ d4db1a1 d3gbja\_ d1ry6a\_  
d1v8ka\_ d1kb0a1 d3vrda1 d3vrda2 d1fcdc2 d1h1oa2 d1h1oa1 d1m70a2  
d1m70a1 d1liqca2 d1liqca1 d1eb7a1 d1nmla2 d1nmla1 d1nira1 d1qksa1  
d1hroa\_ d4gedb\_ d3zooa\_ d1mz4a\_ d1gu2a\_ d1f1fa\_ d1dvva\_ d1c6ra\_  
d1c75a\_ d1e29a\_ d1gdva\_ d1cnoa\_ d1h32b\_ d1co6a\_ d2bh4x\_ d2aiua\_  
d5cytr\_ d1jdl\_ d1i8oa\_ d2zboa\_ d3dmia\_ d1ls9a\_ d1wvec\_ d2yk3a\_  
d3ph2b\_ d1dw0a\_ d5aura\_ d1ql3a\_ d1qn2a\_ d1f1ca\_ d1prtb2 d1levsa\_  
d1cnt1\_ d1pvhb\_ d1z7ca\_ d1huwa\_ d1bgea\_ d1rhga\_ d1f6fa\_ d1f45b\_  
d1i1rb\_ d1axia\_ d1etea\_ d3tgxb\_ d1scfa\_ d2z3qa1 d3qb1a\_ d1hula\_  
d1m48a\_ d4nkqb\_ d1eera\_ d1v7mv\_ d5e4ea\_ d2o27a\_ d3b5ka\_ d2psma1  
d4zf7a\_ d3uf5a\_ d4x51a\_ d1d9ca\_ d4ypgc1 d3oq3a\_ d1n1fa\_ d1aula\_  
d1wu3i\_ d3bes1\_ d3ux9a\_ d3rbaa\_ d2qtra\_ d1nupa\_ d3l92a\_ d1f9aa\_  
d1qjca\_ d2h29a\_ d1vlha\_ d1od6a\_ d1lw7a1 d4ruka\_ d2e17a\_ d1iq0a2  
d1irxa2 d1r6ta2 d1ivsa4 d2cyba\_ d1rqga2 d1j09a2 d2yxna\_ d1f7ua2  
d1h3fa1 d1ffya3 d2g36a1 d1nzja\_ d1jila\_ d1n3la\_ d1pfva2 d1h3na3  
d3n9ia\_ d3sz3a1 d3sw2a\_ d1moxc\_ d1dx5i3 d1edmb\_ d1autl2 d1autl1  
d1nqlb\_ d1dval1 d1szba2 d1kigl\_ d2y5f1\_ d1ijqa2 d1gk5a\_ d1g1sa2  
d1nt0a3 d1xdtr\_ d1lmja2 d1lmja1 d1nzia2 d2wphe\_ d1klil\_ d1pfxl2  
d1pfxl1 d1p9ja\_ d1g1ta2 d1f7ea\_ d4yzub\_ d1nuba2 d2mgpa1 d1b9wa1  
d1b9wa2 d2mgpa2 d1ob1c1 d1ob1c2 d1n1ia2 d1n1ia1 d2npra2 d2npra1  
d1m1xb4 d2y5ia\_ d1qlsa\_ d1psra\_ d3n22a\_ d2egda\_ d4ggfc\_ d2wcea\_  
d2luca\_ d4aqia\_ d3nsia\_ d2lp3a\_ d1j55a\_ d1a4pa\_ d1k8ua\_ d1nsha\_  
d1pvaa\_ d3fs7a\_ d2pvba\_ d1ttxa\_ d1rwy\_ d2kyfa\_ d1rk9a\_ d1a75a\_  
d1exra\_ d1tiza1 d1nyaa\_ d1g8ia\_ d1ggwa\_ d1wdcc\_ d3fwba\_ d1ggza\_  
d2o5ga\_ d1ctaa\_ d1m45a\_ d3i5gc\_ d1sl8a\_ d1fpwa\_ d2scpa\_ d2roaa\_  
d4aqra\_ d3pn7b\_ d1br1b\_ d2mysb\_ d1s6ca\_ d1bjfa\_ d2obha\_ d1jfka\_  
d1jf0a\_ d1qv0a\_ d1lkja\_ d2mlfc\_ d2m97a\_ d2d8na\_ d4by5a\_ d1jbaa\_  
d4nqga\_ d1wdcb\_ d2mysc\_ d1j7qa\_ d1s6ia\_ d1uhka2 d1r2ua\_ d1dtla\_  
d3kf9a\_ d3pn7c\_ d5d67d\_ d1tuza\_ d1h8ba\_ d1eg3a1 d1eg3a2 d2zkmx1  
d1snla\_ d1gjya\_ d1y1xa\_ d1hqva\_ d1dvia\_ d1qxp2 d4usla\_ d1k94a\_  
d1wkya2 d1uuqa\_ d3wh9a\_ d4m1ra\_ d1xyza\_ d4xuya\_ d2je8a5 d4bf7a1  
d3cuia\_ d1ur4a\_ d1qw9a2 d1odza\_ d2vzsa5 d1bqca\_ d2x2ya1 d1hjqa\_  
d1qnra\_ d4y7ea1 d1vjza\_ d4k68a\_ d2v3ga\_ d4hpga\_ d1nofa2 d1nq6a\_  
d1h4pa\_ d1aq0a\_ d3ziza\_ d4bs0a\_ d1ecea\_ d1h1na\_ d1ta3b\_ d1w91a2  
d1ilwa\_ d1uhva2 d1us3a2 d1egza\_ d7a3ha\_ d1tvna1 d3nyda1 d1ghsa\_  
d2cyga1 d4xv0a\_ d2c8na2 d1w32a\_ d3emca\_ d1v6ya1 d1foba\_ d2uwfa1  
d2fgla\_ d3niya1 d2c0ha1 d1rh9a1 d1yq2a5 d1szna2 d1fa2a\_ d1pama4  
d5do8a1 d1hx0a2 d2fhfa5 d1qhoa4 d1avaa2 d1m53a2 d4m8ua1 d2gjpa2

d1lwha2 d4howa1 d1ktba2 d1j0ha3 d3vm5a1 d2x1ia\_ d1wzaa2 d1uasa2  
d2diea1 d1mxga2 d1ht6a2 d1eswa\_ d1liv8a2 d5cpsa\_ d1ud2a2 d1zjaa1  
d3gbea1 d1kwga2 d1wdpa\_ d1gcy2 d1g5aa2 d1hvxa2 d3dhpa2 d2bhua3  
d4do4a1 d3qgva1 d1e43a2 d1g94a2 d2d3na2 d1gjwa2 d1gvia3 d1x1na1  
d1r7aa2 d1tz7a1 g1apy.1 d3ljqa\_ d4toqa\_ d1wb0a1 d1w9pa1 d1eoka\_  
d1itxa1 d1kfwa1 d1goia2 d1edqa2 d2gsja\_ d1hjxa1 d1jnda1 d1vf8a1  
d3wdpp1 d3wq5a\_ d1gnxa\_ d4gxpa\_ d4hz8a\_ d1e4mm\_ d3aiua\_ d1wcca1  
d1qvba\_ d3ahxa\_ d1v02a\_ d2dgaa\_ d1pbga\_ d1vffa1 d1qoxa\_ d4ha4a\_  
d1mixa2 d1e5wa2 d1j19a2 d1isna2 d2a16b2 d3syxa1 d1mkea1 d2p8va\_  
d1xoda1 d1i7aa\_ d1qc6a\_ d1egxa\_ d1id1a\_ d2hmta\_ d2v76a\_ d1wj1a1  
d1aqca\_ d1qgga2 d1qgga1 d1ntva\_ d1n3ha\_ d4dbba\_ d3f0wa1 d1p3ra\_  
d1wgua1 d2cy4a1 d3hqca\_ d1wvha1 d1xr0b1 d3nvva1 d1krha3 d2h88b1  
d1n62a2 d1t3qa2 d1kf6b2 d1zoyb1 d1jq4a\_ d1ffva2 d1dgja2 d1rm6c2  
d1h6ta1 d9ldta1 d2ewda3 d1up7a1 d2dfda1 d1s6ya1 d1vjta1 d7mdha1  
d1hyea1 d1t2da1 d1ojsa3 d1ldna1 d1hyha1 d1civa1 d2a92a1 d1ez4a1  
d1i0za1 d1y6ja1 d1gv0a1 d1ur5a1 d1llda1 d1obba1 d1v8ba1 d1gdha1  
d1l7da1 d2dlda1 d1mx3a1 d1ygya1 d1qp8a1 d1li4a1 d1j4aa1 d2naca1  
d1npya1 d3t4ea2 d1a4ia1 d1o0sa1 d2hk9a2 d2egga2 d1b26a1 d1bvua1  
d1gq2a1 d1clda1 d1leha1 d1gtma1 d1euza1 d1nvtal d3dona2 d1ledza1  
d1gpja2 d1p77a1 d1nyta1 d1b0aa1 d1vl6a1 d1v9la1 d1txga2 d3f47a1  
d1mv8a2 d2pv7a2 d1xc2a3 d2ahra2 d4xiya1 d2f1ka2 d1pgja2 d1i36a2  
d1np3a2 d1lj8a4 d1teaa3 d1qmg2 d2i76a2 d2g5ca2 d1wdka3 d1dlja2  
d3cuma3 d1kola2 d1f8fa2 d1qora2 d1jqba2 d1vj0a2 d1cdoa2 d1gu7a2  
d1d1ta2 d1xa0a2 d2dm6a2 d1jvba2 d1rjwa2 d1llua2 d1h2ba2 d1tt7a2  
d1piwa2 d1o89a2 d1iz0a2 d1e3ja2 d1yb5a2 d1uufa2 d1vj1a2 d1e3ia2  
d1vc2a1 d2nvwa1 d1u8fo1 d1ydwa1 d1hdgo1 d2g17a1 d1cf2o1 d2czca2  
d1r0ka2 d1obfo1 d2cvoa1 d1ebfa1 d1h6da1 d1i32a1 d1zh8a1 d2q49a1  
d1qkia1 d1j5pa4 d3pzra1 d1xeea1 d1vkoa1 d1vm6a3 d3qvsa1 d2pkqo1  
d1b7go1 d1gr0a1 d1p1ja1 d1lc0a1 d1j0xo1 d3pwka1 d2hjsa1 d1zyao1  
d1vkna1 d1tlta1 d1nvmb1 d3sjua\_ d3ojfa1 d1xu9a1 d2jjya1 d1n7ha\_  
d1ylpa1 d1h5qa\_ d1jtv2\_ d4fs3a\_ d2bkaa1 d1gy8a\_ d2c5aa1 d1ulsa\_  
d1ooea\_ d2b69a1 d1y5ma1 d1spxa\_ d1aela\_ d1bxka\_ d1ydea1 d1gega\_  
d1hdoa\_ d1o5ia\_ d1e6ua\_ d1snya1 d2rhca\_ d3zv4a\_ d5ceja\_ d2d1ya1  
d1fjha\_ d3w8ea\_ d2fmua1 d1x1ta\_ d1rpna\_ d3ay7a1 d1k2wa\_ d1eq2a\_  
d2hrba1 d3ruaa\_ d2ew8a1 d4hwka\_ d1xgka\_ d2bd0a1 d1yo6a1 d2a35a1  
d2ntva\_ d1vl8a\_ d1hdca\_ d4bkua\_ d2ag5a1 d2q45a\_ d1nffa\_ d4iy1a\_  
d1zbqa1 d1kewa\_ d1ek6a\_ d1ja9a\_ d2q46a2 d1iy8a\_ d1cyda\_ d2ptga\_  
d1hxha\_ d1uzma1 d3lyla\_ d4m89a\_ d3wyea\_ d2blla1 d1w6ua\_ d1sb8a\_  
d2q2va\_ d4nr0a\_ d1e6wa\_ d2gasa\_ d3oiga1 d2bgka1 d1mxha\_ d1vl0a1  
d1rkxa\_ d1r6da\_ d1wmaa1 d1e7wa\_ d2c07a1 d1xkqa\_ d3tzha\_ d1g0oa\_  
d3lz6a\_ d1qyca\_ d1ledoa\_ d1gz6a\_ d1loc2a\_ d1t2aa\_ d1zema1 d2xoxa\_  
d1z45a2 d1geea\_ d1p33a\_ d3lt0a\_ d4e6pa\_ d2wyua\_ d1db3a\_ d4q9na\_  
d1xhla\_ d4o1ma\_ d1fmc2 d2uvda\_ d2gdza1 d1uaya\_ d2z1ma\_ d2o23a2  
d2fr1a2 d2fr1a1 d1qsga\_ d1qyda\_ d4zjua\_ d2a4ka1 d1yb1a\_ d1wvga1

d1yxma1 d3f4ba\_ d1mg5a\_ d1xg5a1 d3nqyb\_ d4gera\_ dl3x0a4 d2f4ma1  
d1x3za\_ d3ulra1 d1g9ka2 d1k7ia2 d3ioqa\_ d1fh0a\_ d1khqa\_ d1m6da\_  
d2cb5a\_ d1cs8a\_ g8pch.1 d1s4va\_ d2pnsa\_ d1vsna1 d1mira\_ d1iwda\_  
d2oula\_ d7pcka\_ d3bwka\_ d3bcna\_ d2p86a\_ d1pvja\_ d1pcia\_ d1gece\_  
d1deua\_ d4bs6a\_ d1xkga1 d1cqda\_ d1jqpa2 d2c0ya\_ d2bdza\_ d3p5ua\_  
d2o36a\_ d1k9xa\_ d1zoya1 d1qo8a2 d1d4ca2 d1chua2 d1jnra2 d1kf6a2  
d2jk6a2 d2jk6a1 d1feca1 d1feca2 d1lpfa1 d1lpfa2 d1xhca1 d1xhca2  
d1dx1a2 d1dx1a1 d1gera2 d1m6ia2 d1onfa1 d3lada2 d3lada1 d1w4xa1  
d1w4xa2 d1gesa2 d1mo9a1 d1xdia1 d1f12a2 d1f12a1 d1fcda1 d1fcda2  
d1h6va2 d1h6va1 d1mo9a2 d1gv4a2 d1gv4a1 d2gv8a2 d2gv8a1 d1aoga1  
d1aoga2 d1hyua1 d1ebda1 d1ebda2 d3dk9a1 d1q1ra2 d1q1ra1 d1gesa1  
d1zbf1a1 d2z1ha\_ d2etja1 d3qioa1 d1j11a\_ d2e41a\_ d1j12a\_ d21sna1  
d1lio2a\_ d1uaxa\_ d2yv0x\_ d1mu2a1 d1ekea\_ d1o94a2 d1lqta1 d1cjca1  
d1s5ja1 d2hbja2 d2igia\_ d1wlja\_ d1qhta1 d4dlea1 d1tgoa1 d2f96a1  
d3tr8a1 d3mxma\_ d1q8ia1 d1y97a1 d1w0ha\_ d1kfsa1 d2py5a1 d1d5aa1  
d1yt3a3 d2guia\_ d3mwpal d4kb1a\_ d1b9ra\_ d1offa\_ d1frra\_ d3wcqa\_  
d1l5pa\_ d1wria\_ d1i7ha\_ d3av8a\_ d1czpa\_ d1rfka\_ d3p1ma1 d3b2ga\_  
d2bt6a2 d1v58a1 d1t3ba1 d4ilfa2 d4npba2 d1wgqa1 d1v89a1 d2codal  
d1zc3b\_ d1wg7a1 d1u5ea1 d1v61a1 d2coca1 d2ys1a1 d1v5pa1 d1ntya2  
d1wjma1 d1wila1 d1u29a\_ d1xx0a1 d1unqa\_ d2zkmx3 d1fhoa\_ d1v88a1  
d2adza1 d1x1fa1 d1p6sa\_ d2coaa1 d1btka\_ d1v5ma1 d1faoa\_ d2x18a\_  
d1dyna\_ d1x1ga1 d4kaxb\_ d2j59m1 d1xcga2 d1txda2 d1u5da1 d1dbha2  
d1wlha\_ d1upqa\_ d1v5ua1 d1foea2 d2fj1a1 d1eaza\_ d2dfka2 d2cofa1  
d1kz7a2 d1r7ha\_ d1faaa\_ d1wika1 d1xfla\_ d1ttza1 d2f51a1 d1ti3a\_  
d1nhoa\_ d1sena\_ d2i4aa\_ d1ep7a\_ d1zmaa1 d1fo5a\_ d3lefa1 d3diea1  
d2yana1 d1z6na1 d1oaza\_ d3zywa1 d4aj8a\_ d1nm3a1 d4fiwa\_ d1wmja\_  
d4hs1a1 d1iloa\_ d1xwaa1 d1wjka1 d2vm1a\_ d1fb6a\_ d1gh2a\_ d1h75a\_  
d1nw2a\_ d1kx5b\_ d3a6na\_ d4m6ba2 d2nqbd\_ d3wkjd\_ d2yfwe\_ d4h9na\_  
d5bnxa\_ d1kx5c\_ d3r45a\_ d1eqzb\_ d4jjnb\_ d1f66c\_ d1eqza\_ d4wnnb\_  
d1kx5a\_ d1u35c1 d1id3a\_ d2nqbc\_ d1ku5a\_ d1f1ea\_ d1b67a\_ d1tafa\_  
d1bh9b\_ d1tafb\_ d1jfib\_ d1q9ca\_ d1h3ob\_ d2byka1 d1n1ja\_ d4g92b\_  
d1bh9a\_ d1jfia\_ d1h3oa\_ d2bykb1 d1pd212 d1nhya2 d2a2ra2 d1k0dd2  
d1f2ea2 d1gsua2 d1f3ba2 d2fhea2 d2pvqa1 d1tw9a2 d1oyja2 d1e6ba2  
d3ik7a1 d4is0a1 d1r5aa2 d1j1va2 d1m0ua2 d3gtub2 d1z9ha2 d1okta2  
d1axda2 d2gsra2 d1tu7a2 d1k3ya2 d1zgma1 d1b48a2 d1gnwa2 d1gwca2  
d2gsta2 d1glqa2 d1oe8a2 d1pn9a2 d1v2aa2 d1fw1a2 d1duga2 d1g99a1  
d2elza2 d2elza1 d1saza1 d1saza2 d2trcp\_ d1ig8a1 d1czan2 d1czan3  
d1czan1 d1ig8a2 d1czan4 d1bg3a4 d1bg3a3 d1bg3a2 d1bg3a1 d1qqya\_  
d1gd6a\_ d1f6ra\_ d1ivma\_ d2gv0a\_ d1iiza\_ d2z2fa\_ d1j8xa\_ d1gh1a\_  
d1b9oa\_ d1741a\_ d1691a\_ d2o4wa\_ d1p37a\_ d1k28a3 d1xjta1 d1jtma\_  
d2f2qa\_ d4e97a1 d1g4ma1 d1g4ma2 d4qgna\_ d1vr3a1 d2pjsa1 d2i7ra1  
d1ecsa\_ d1xqaa1 d5cj3a1 d1npba\_ d1jifa\_ d2p7oa\_ d1r9ca\_ d1nkia\_  
d1mpya2 d1kw3b2 d1kw3b1 d4ghga1 d1tfza1 d3isqa1 d3isqa2 d1sqia1  
d1sqia2 d1lkda2 d1lkda1 d1mpya1 d1cjxa2 d1cjxa1 d1sp9b2 d1t47a1

d1t47a2 d1f1ua2 d1sp8a1 d1sp8a2 d1f1ua1 d2bema\_ d1pama1 d1ea9c1  
d1qhoa1 d2fhfa2 d2fhfa1 d1k3ia1 d1j0ha1 d1csla1 d2bhua1 d1ledqa1  
d1f1sa2 d1ut9a2 d1gvia1 d1txka1 d1ro5a1 d4iuua3 d4bvva\_ d5hpga\_  
d3k65a\_ d1ki0a3 d1ki0a2 d1ki0a1 d1a0ha1 d1pmla\_ d3sp8a3 d2feba1  
d1qsta\_ d2beia1 d4m3sa\_ d1u6ma1 d1yk3a1 d3dr6a\_ d1xmta\_ d1z4ea1  
d2ge3a1 d1bo4a\_ d2fiaa1 d2jdca1 d1y9wa1 d3to7a\_ d1wwza1 d2fl4a1  
d2ozua1 d2b5ga\_ d2cy2a1 d2p0wa\_ d1cm0a\_ d4pswa\_ d1yrea1 d1yr0a1  
d1m4ia\_ d2gana1 d1yvka1 d1ghea\_ d2g3aa1 d1y7ra1 d2euia1 d1q2ya\_  
d2fsra1 d1xeba\_ d2ae6a1 d1cjwa\_ d1qsmas\_ d2aj6a1 d1y9ka1 d1i12a\_  
d1vkca\_ d2atra1 d1n71a\_ d2d4pa1 d2fiwa1 d2fe7a1 d1tiqa1 d2ou2a\_  
d1yx0a1 d2fcka1 d1p0ha\_ d2j8ma\_ d2pq8a\_ d1z4ra1 d1s3za1 d1ufha\_  
d2hqya1 d2hqya2 d1lrza2 d1ne9a1 d1lrza3 d1xvqa1 d1pn0a2 d3hy2a\_  
d2cvba1 d1o8xa\_ d1lu4a\_ d1we0a1 d2bmxal d2a4va1 d1psqa\_ d1xiya1  
d1q98a\_ d1n8ja\_ d1zofa1 d2ggta\_ d3tjja\_ d4je1a1 d1o73a\_ d3s9fa\_  
d2zcta\_ d1qmva\_ d1jfua\_ d2b1ka\_ d5dvba1 d2b5xa1 d2v2ga\_ d3tb2a\_  
d4llra\_ d4fh8a1 d1e2ya\_ d1knga\_ d2h30a\_ d1i5ga\_ d2z9sa\_ d2f8aa1  
d1tp9a1 d2b7ka\_ d1nm3a2 d3hvva\_ d2wfca1 d4kcea\_ d1xvwa1 d4gqca1  
d3qpma\_ d4k1fa\_ d1zzoa1 d1gp1a\_ d1prxa\_ d1rmka\_ d1ixta\_ d1eyoa\_  
d1cnaa\_ d1fu3a\_ d1g1pa\_ d1f3ka\_ d1fyga\_ d2m5ta\_ d1cqqa\_ d1wqsa\_  
d5bpea\_ d2ipha\_ d1lvoa\_ d2bhga1 d3tnta\_ d3sjia\_ d3d23a1 d2fyqa\_  
d3tloa\_ d3zvea1 d2hrva\_ d3q3ya1 d4asha1 d4aw8a\_ d1etha2 d1w52x1  
d2ppla1 d1hpla2 d1lpbb2 d2oxea1 d1rpla2 d1ysl1x\_ d4hs9a\_ d1ispa\_  
d1ku0a\_ d3qmma\_ d1ra6a\_ d1muka\_ d3gsza\_ d1khva\_ d1te9a\_ d2xwha\_  
d3uqsa\_ d3hkwa\_ d3n6ma\_ d2cjqa\_ d2xyma\_ d1teba\_ d1te8a\_ d1u09a1  
d4wfxa\_ d3tyqa\_ d2pgga1 d2h1ia1 d2r8ba1 d3b5ea1 d3cn9a\_ d1lgya\_  
d4l3wa\_ d1llfa\_ d1gz7a\_ d1lukca\_ d1cr6a2 d1ixra2 d1mbma\_ d3su6a1  
d1cula1 d4agka\_ d1vcpa\_ d1q31a\_ g1n11.1 d3e90b\_ d1ep5a\_ d3u1jb\_  
d3zxha\_ d1cgl1a\_ d1rm8a\_ d1leaka2 d1hy7a\_ d2jsda\_ d1cxva\_ d1hv5a\_  
d1i76a\_ d3p0ya1 d1igra2 d1n8yc2 d1n8yc1 d1m6ba2 d1m6ba1 d1m4la\_  
d2bk7a\_ d3fjua\_ d1z5ra1 d1kwma1 d1uwy2 d1jqga1 d2c1ca1 d1dtda\_  
d1jgta2 d1ea0a3 d1ecfa2 d1q15a2 d1ct9a2 d1ao0a2 d1te5a\_ d2tbvc\_  
d1c8nc\_ d1x36a\_ d1smvc\_ d1ng0c\_ d4sbvc\_ d1lopa\_ d1f2nc\_ d1cixa\_  
d1y29a\_ d1v7fa\_ d2jtba\_ d1d1ha\_ d1g9pa\_ d1lupa\_ d1qk7a\_ d1mb6a\_  
d2a2va\_ d1niya\_ d1i25a\_ d1hvwa\_ d2mpqa\_ d1ie6a\_ d1la4a\_ d2mxoa1  
d1d10a\_ d1koza\_ d1qk6a\_ d1emxa\_ d1lqra\_ d1c6wa\_ d1js9c\_ d1f15b\_  
d1za7a\_ d1laja\_ d1rypd\_ d1lrua\_ d1rypc\_ d3unfk\_ d1rypa\_ d1j2pa\_  
d1lru1\_ d1j2qh\_ d3unfh\_ d1m4ya\_ d1rypb\_ d1lru1\_ d1lru1\_ d1lru2\_  
d1q5rh\_ d1rypg\_ d1g3ka\_ d1lru1\_ d1q5qa\_ d1e94a\_ d1lru1\_ d1ryph\_  
d3ty6a\_ d1lru1\_ d1lru1\_ d1rype\_ d1lru1\_ d1lru1\_ d3mi01\_ d1rypf\_  
d1lru1\_ d2z3ba\_ d3mka2\_ d1lru1\_ d1ny721 d1a6ca3 d1a6ca2 d1a6ca1  
d1pgl22 d1pgl21 d1pgl11 d1ny711 d1mqta\_ d1d4m3\_ d1fmd3\_ d2mev1\_  
g1aym.1 d1ev13\_ d4q4w1\_ d1r1a3\_ d2x5ia\_ g1r1a.1 g1d4m.1 g1rhi.1  
d1b35b\_ d1lopa\_ d1tme1\_ d4iv1a\_ g1pvc.1 g1fpn.1 d1fpn1\_ d4gb31\_  
d1d4m1\_ d1fmd1\_ d1ev11\_ d2wzr3\_ g1cov.1 d1qqp3\_ g1fmd.1 d2x5ic\_

d1rhi3\_ gloop.1 d1hxs1\_ g1hxs.1 d1fpn3\_ d1bev1\_ g2mev.1 d1eah3\_  
d1aym1\_ d1pvc3\_ d1qqp1\_ d1zba3\_ d1h8ta\_ d3vbhc\_ g1b35.1 g1bev.1  
d1hxs3\_ g1ev1.1 d1bev3\_ g1tmf.1 d1tmf1\_ d1b35a\_ d2mev3\_ g1eah.1  
g1h8t.1 d1eah1\_ d4q4w3\_ d1r1a1\_ d1aym3\_ d1pvc1\_ d1zba1\_ d1h8tc\_  
d1oopc\_ d1tme3\_ g1qqp.1 d4iv1c\_ g1tme.1 d1y14b1 d2nn6i1 d1i94l\_  
d2zjra2 d1smxa\_ d2qamc2 d1hh2p1 d2r7da1 d1rl2a2 d1wfga1 d3bzka4  
d1x6oa2 d3a0ja\_ d2j01d2 d2ja9a1 d4q15a\_ d1hr0w\_ d1luza\_ d2n3sa\_  
d2vnud1 d1h95a\_ d1go3e1 d2nn6h1 d1ne3a\_ d2mola\_ d1liz6a2 d1jjga\_  
d1e3pa2 d2ix0a3 d2ix0a2 d2lxja\_ d1ueba3 d1ueba2 d2z0sa1 d1u01a1  
d2ix0a1 d2eifa2 d2je6i1 d3i2za1 d2c35b1 d2ahob2 d1t9ha1 d3i4oa\_  
d2qall1 d1jt8a\_ d2nn6g1 d1g6pa\_ d3cama\_ d1i94q\_ d1c9oa\_ d1d7qa\_  
d2ba0a1 d2vnud2 d2vnud3 d2qalq1 d1wi5a1 d1xta2 d1ny4a\_ d4w9ta\_  
d1jvna1 d4x2ra1 d1ka9f\_ d1qo2a\_ d4axka1 d1thfd\_ d4u28a\_ d2y88a\_  
d4wd0a\_ d1vzwa1 d1ix2a\_ d1ux8a\_ d1dlya\_ d4i0va\_ d2bkma\_ d1dlwa\_  
d2bmma\_ d2r80b\_ d1cqxa1 d1cg5a\_ d1gcvb\_ d3boma\_ d2h8fb\_ d2raoa\_  
d3bj1a\_ d4hrrb\_ d2r50a\_ d3d1kb\_ d2aa1b1 d3zhwa\_ d3hf4b\_ d3gdja\_  
d1jebb\_ d3bj1b\_ d1x9fb\_ d1wmub\_ d1gcva\_ d3bcqb\_ d3d4xb\_ d1gvha1  
d2dc3a\_ d3hf4a\_ d4yu3a\_ d3k8ba\_ d1qpwb\_ d2r80a\_ d3bcqa\_ d1v4wa\_  
d3wtgb\_ d1jl7a\_ d4esaa\_ d1a9we\_ d3d1ab\_ d1fsla\_ d4h21a\_ d1v4wb\_  
d1mwca\_ d1vhba\_ d1jeba\_ d1spgb\_ d1h97a\_ d1q1fa\_ d1tu9a1 d3d1aa\_  
d1hdsb\_ d3hyub\_ d2zfb\_ d3fs4a\_ d1oj6a\_ d1shrb\_ d4h21b\_ d4yu3b\_  
d1spga\_ d3hrwa\_ d3qqra\_ d3at5a\_ d4wchd\_ d3hyua\_ d1cg5b\_ d1uc3a\_  
d1hbra\_ d2raob\_ d1outb\_ d4esab\_ d3gdjb\_ d3qqqa\_ d1x9fc\_ d3vrf\_ a\_  
d1litha\_ d3mkba\_ d3d4xa\_ d3mjpa\_ d1jl6a\_ d3fh9a\_ d1outa\_ d2dc3b\_  
d1lit2a\_ d3eoka\_ d3g46a\_ d1qpwa\_ d3vrfb\_ d1ch4a\_ d1x9fd\_ d1hdsa\_  
d2zfb\_ a\_ d3mkbb\_ d1or4a\_ d3wtga\_ d1a4fa\_ d3fh9b\_ d3bomb\_ d3cy5a\_  
d3at5b\_ d1x9fa\_ d2oifa\_ d4lmb\_ d1cpcb\_ d3v57a\_ d1kn1a\_ d1cpca\_  
d4f0ta\_ d2vjha\_ d4po5b\_ d1eyxa\_ d1alla\_ d4f0tb\_ d1b33b\_ d1b8db\_  
d4h0mb\_ d1b33a\_ d2vjhb\_ d4lm6b\_ d2vmlb\_ d1allb\_ d2vjta\_ d3dbja\_  
d2vmla\_ d2vjtb\_ d4f0ub\_ d1f99b\_ d4rmpa1 d1liaa\_ d1eyxb\_ d2uulb\_  
d4lmsb\_ d4f0ua\_ d2bv8a\_ d1f99a\_ d2bv8b\_ d2c71b\_ d3dbjb\_ d4rmpb1  
d1b8da\_ d4h0ma\_ d3v57b\_ d1kn1b\_ d2uula\_ d2j96a\_ d3w3ea\_ d4tx7a\_  
d3cq1a\_ d4msta\_ d3iwra\_ d1dxja\_ d2z37a\_ d4dyga\_ d1k8qa\_ d2xqfa\_  
d1ea5a\_ d1f6wa\_ d1dx4a\_ d1qe3a\_ d4qwwa\_ d2ha2a\_ d1sfra\_ d1f0na\_  
d4qeka\_ d1xm5a\_ d1xaxa\_ d1tvia\_ d1pv8a\_ d1w5qa\_ d2c1ha\_ d1ohla\_  
d1dosa\_ d3qm3a1 d2fjka\_ d1f74a\_ d3l21a\_ d2e1da\_ d1to3a1 d1w3ia\_  
d1sfla\_ d1n7ka\_ d1vcva1 d4imea\_ d1wa3a\_ d2ocza1 d1f2ja\_ d3m16a\_  
d2yxga\_ d1ub3a\_ d3a5fa\_ d1fbaa\_ d1l6wa\_ d1xfba1 d1wx0a1 d1vpxa1  
d1ojxa\_ d1mxsa\_ d2a4aa1 d1xkya1 d3cq0a1 d3s1xa\_ d1f05a\_ d1fdja\_  
d3cpa1 d4d2ja\_ d1yloa2 d1y7ea2 d1y0ya3 d1lfa1 d1vixa1 d1fnoa4  
d1vhoa2 d1ysja1 d1vhea2 d1z21a1 d2fvga2 d1vgya1 d1r3na1 d2grea2  
d1xmba1 g1q71.1 d1rtqa\_ d3rp2a\_ g1lucy.1 d1fuja\_ d2zchp\_ d3w94a\_  
d1si5h\_ d1lo6a\_ g2pka.1 d1cgha\_ d1kigh\_ d1a5ia\_ d3s9ba\_ d1hj8a\_  
d1ao5a\_ d2anya\_ d1q3xa1 d1gvza\_ d1azza\_ d4gsoa\_ d2f91a1 d1liau\_ a\_

d1gdna\_ d1eufa\_ g1fiw.1 d1eq9a\_ d4nfea\_ d2rdla\_ d1spja\_ d1elva1  
d1a7sa\_ d1ekbb\_ d1pfxc\_ d1yc0a\_ d2aiqa\_ g1fiz.1 d1fi8a\_ d4k60a\_  
d4dgja\_ d1mzaa\_ d1op0a\_ d3tjva\_ d1pytd\_ d1sgfg\_ g1gg6.1 d2eeka\_  
g1rtf.1 d1a0ja\_ d3g01a\_ d1pytc\_ d4e7na\_ d1ddja\_ d1z8ga1 d2hlca\_  
d1npma\_ d1brup\_ g1jou.1 d1sgfa\_ d1autc\_ g2hnt.1 g1kdq.1 d1orfa\_  
d3s69a\_ d4crga\_ d1fxya\_ d1bqya\_ d2ftba\_ d1pmpa\_ d2rcqa1 d1fdqa\_  
d4lkpa\_ d1sa8a\_ d1vyfa\_ d1lpja\_ d3vg7a1 d4azqa1 d1o8va\_ d5bvqa\_  
d1p6pa\_ d2qo4a\_ d1opba\_ d1yiva1 d1o1va\_ d4bvma1 d4tkba\_ d4i3ba\_  
d1bwya\_ d1ftpa\_ d4gkca\_ d1cbia\_ d3p6da1 d1kqwa\_ d2a0aa1 d1jx4a2  
d3gv5b1 d1t94a2 d3bq0a2 d3lgia\_ d3i77a\_ d2z9ia2 d4nsva\_ d1lcy2  
d4jcna\_ d1agja\_ d1os8a\_ d1hpga\_ d1p3ca\_ d1qtfa\_ d1e69a\_ d1mv5a\_  
d3g60a4 g1ii8.1 d1ewqa2 d1qhla\_ d1v43a3 d2wmfa1 d1vpla\_ d1g2912  
d4a82a2 g1f2t.1 d2d62a1 d3tuic1 d2bbsa1 d3g60a3 d2ixea\_ d1g6ha\_  
d1sgwa1 d2qi9c\_ d3rlfa1 d3b60a1 d3d31a2 d2pzea1 g1xew.1 d1jj7a\_  
d1oxxk2 d2onka1 d1w1wa\_ d1iwea\_ d1qf5a\_ d1vmaa2 d1nija1 d1np6a\_  
d2p67a1 d3ihla\_ d1okkd2 d1l1sa2 d1s1ma2 d1iona\_ d2v40a\_ d1dj3a\_  
d3hida\_ d2vola1 d2g0ta1 d1vcoa2 d1j8mf2 d1xjca\_ d1p9ba\_ d1qzxa3  
d1ihua2 d1ihua1 d2qm8a\_ d1dj2a\_ d4ioja\_ d1cp2a\_ d1yrba2 d1hyqa\_  
d3gqba2 d1skye3 d1xp8a1 d1tf7a2 d1tf7a1 d1ye8a1 d1skyb3 d2qe7d2  
d4blta\_ d4huta\_ d3l1daa2 d4hyya\_ d2i3ba1 d1cr1a\_ d3j9tb2 d3ntua2  
d1vdza1 d2z43a\_ d1e9ra\_ d1nlfa\_ d3ziaa2 d1n0wa\_ d3ziad2 d3j9ta2  
d1pzna2 d3gqbb2 d2i49a\_ d1nnfa\_ d1xvxa\_ d1ursa\_ d1h3da1 d1iuda\_  
d4m1va1 d1twya\_ d3e13x\_ d2nxoa1 d4pfua\_ d3ttma\_ d1elja\_ d2qmw1  
d1us5a\_ d1y3na1 d1jeta\_ d1uqwa\_ d4f19a1 d2esna2 d3thia\_ d3fasa1  
d2uyeb\_ d2xwva1 d1r9la\_ d2fyia1 d1pb7a\_ d2ozza1 d1sw5a\_ d1nh8a1  
d1vr5a1 d2g29a\_ d1xs5a\_ d3lswa\_ d2z23a\_ d3w9va\_ d3tcha\_ d1q35a\_  
d1z7me1 d3q27a\_ d1p99a\_ d1ve4a1 d2i6ea1 d4mcoa1 d4n8ya\_ d1zbma1  
d1hsla\_ d1lixca2 d1j1na\_ d1xvya\_ d1y9ua\_ d2z22a1 d1xoca1 d4oera\_  
d1wdna\_ d5f1qa1 d1xt8a1 d1i6aa\_ d4gwoa\_ d4igta1 d1pc3a\_ d4mmpa1  
d1o63a\_ d2cz1a1 d2onsa2 d4mija1 d1eh3a\_ d3skpa\_ d1dtza1 d1dtza2  
d1ieja\_ d1jnfa2 d1ce2a1 d1jnfa1 d1b1xa2 d1b1xa1 d1jw1a1 d1jw1a2  
d1ryoa\_ d1h76a1 d1h76a2 d1c4oa1 d2p6ra3 d2p6ra4 d1oywa2 d1oywa3  
d1wrba1 d1w36b2 d1w36b1 d1c4oa2 d3bora\_ d1t6na\_ d2eyqa5 d2eyqa3  
d2eyqa2 d2zu6a2 d1veca\_ d1uaaa1 d1w36d1 d2g9na1 d1z3ix2 d2rb4a\_  
d1hv8a1 d1hv8a2 d1t5ia\_ d1w36c2 d2j0sa2 d2j0sa1 d3hjha1 d1z5za1  
d1qdea\_ d1z63a1 d1s2ma2 d1s2ma1 d1wp9a1 d1wp9a2 d1gm5a3 d1gm5a4  
d3dina4 d3dina3 d1q0ua\_ d1w36c1 d1z3ix1 d1nkta3 d1nkta4 d1uaaa2  
d1w36d2 g1qhh.1 d2fwra2 d2fwra1 d2fkza\_ d1zuj1 d1s3qa1 d2fjca1  
d1z6om1 d1veia\_ d4dyya\_ d1jiga\_ d3gvya\_ d2pyba\_ d4cy9a1 d3bvfa1  
d1r03a\_ d2cf7a\_ d1nf4a\_ d1zs3a1 d4iwka\_ d3ka8a\_ d3np0x\_ d1n1qa\_  
d11b3a\_ d4e6ka\_ d1z6oa1 d2fzfa1 d4dyua\_ d3ge4a\_ d1jgca\_ d4am4a\_  
d2z6ma\_ d1ji5a\_ d1vlga\_ d1lkoa1 d3qz3a\_ d1o9ra\_ d2ffxj\_ d1euma\_  
d1yv1a1 d2v2pa\_ d1j30a\_ d4di0a\_ d1dpsa\_ d2cbia2 d1gqia1 d2choa2  
d1oewa\_ d2qzxa\_ d2asia\_ d1psoe\_ d1miqa\_ d1smra\_ d2h6ta\_ d1pfza\_

d1izda\_ d3hd8a\_ d1j71a\_ d1dpja\_ d4aa9a\_ d1t6ex\_ g1b5f.1 g1lya.1  
g1htr.1 d1qdma2 d1bxoa\_ d1wkra\_ d1tzsa\_ d2qzwa\_ d1bdqa\_ d3ggta\_  
d3ixoa\_ d1mrxa\_ d2haha\_ d1tw7a\_ d4njsa\_ d1sgua\_ d2p3da\_ d1nsoa\_  
d3d3ta\_ d2rkfa\_ d1c6ya\_ d3ogpa\_ d3ekwa\_ d2o4na\_ d2j9ja\_ d1baia\_  
d3ggua\_ d3lzua\_ d4npua\_ d4j55a\_ d2r8na\_ d2fxda\_ d2p3ca\_ d4dqea\_  
d3ttpa\_ d3t3ca\_ d2p3aa\_ d2hc0a\_ d2fdda\_ d3mwsa\_ d1k8rb\_ d1wgra1  
d1ef5a\_ d1wfyal d1wgya1 d1l1fda\_ d2cs4a1 d1wxma1 d2byea1 d3kh0a1  
d2byfa1 d1wxaa1 d1e7ua3 d1l17ya\_ d1wgda1 d1wgga1 d4q5eb\_ d1wjna1  
d1se9a\_ d3n3kb\_ d1wz0a1 d1we6a1 d2m0xa\_ d2gbka\_ d3rt3b1 d1wh3a1  
d1sifa\_ d2ekek2 d4ii2b1 d4hk2a1 d1c3ta\_ d1m94a\_ d1wgha1 d1ttna1  
d1j8ca\_ d1wx8a1 d3v6cb1 d2ma9b\_ d4i61b1 d1bt0a\_ d2jvca1 d1iyfa\_  
d2k1fa\_ d1wxva1 d1wf9a1 d1t0ya\_ d2io0b2 d1x1ma1 d2gbma\_ d1zw7a1  
d2m17a\_ d1ud7a\_ d1we7a1 d2l1wpa\_ d2g2bja\_ d1wjua1 d1v6ea1 d1v86a1  
d4eewa\_ d1wiaa1 d4icva\_ d4gu2a\_ d1wx7a1 d1wy8a1 d4hjka1 d2faza1  
d1v5oa1 d3ruib\_ d1eo6a\_ d3waob\_ d2r2qa1 d3m95a\_ d3wana\_ d1yvca1  
d1yeza1 d1g66a\_ d5ajha1 d4lu0a\_ d1of8a\_ d3unda1 d3e9aa1 d1vr6a2  
d2qkfa\_ d1d9ea\_ d1o60a\_ d1um8a\_ d1ixza\_ d1qvra2 d1qvra3 d1qzma\_  
d1sxjc2 d1jr3d2 d2p65a\_ d1l18qa2 d1g8pa\_ d3hu3a3 d1sxjd2 d1njfa\_  
d1in4a2 d1sxja2 d1tuea1 d2ce7a2 d1w5sa2 d1sxjb2 d1d2na\_ d1ny5a2  
d1ofha\_ d2gnoa2 d2a5yb3 d1fnna2 d1u0ja1 d1lv7a\_ d1iqpa2 d2fnaa2  
d1ixsb2 d4gita\_ d1sxje2 d1g41a\_ d2l1j7a\_ d1n4na\_ d2m8bb1 d2kyqa\_  
d3psma\_ d1jkza\_ d1jxca\_ d2g11a\_ d1ugla\_ d4uj0a\_ d2k4ua\_ d1hp2a\_  
d2lu9a\_ d1baha\_ d2meoa1 d1wm7a\_ d1hlya\_ d1n8ma\_ d1jlza\_ d1wpda\_  
d1c55a\_ d1pvza\_ d1wt7a\_ d1rjia\_ d1wz5a\_ d1m2sa\_ d1pjva\_ d1c49a\_  
d1qkya\_ d2ktca1 d1wmta\_ d1du9a\_ d1j5ja\_ d1r1ga\_ d1t0za\_ d2i61a\_  
d1t1ta\_ d1sn4a\_ d1kv0a\_ d2l1kba\_ d1npia\_ d1wwna\_ d1pe4a\_ d2kbka\_  
d2li7a\_ d1djta\_ d2kbha\_ d1dq7a\_ d1sega\_ d1omya\_ d1zywa1 d1jzaa\_  
d2j2cqa\_ d1dy2a\_ d1t61c1 d1iyjb4 d1iyjb5 d1iyjb3 d1o7ia\_ d4ipca1  
d1x3ea\_ d4apva\_ d1jb7a1 d1jb7a2 d1jb7a3 d3kdfa\_ d1ue1b\_ d1wjja1  
d3eiva\_ d1xjva2 d1xjva1 d2ccza2 d1se8a\_ d1l1oc\_ d1jb7b\_ d1qvca\_  
d3ulla\_ d1qzga\_ d1miua4 d1miua5 d1miua3 d3g48a1 d1gd7a\_ d1jjcb3  
d1pyba\_ d3ubub\_ d1legia\_ d1qo3c\_ d1v7pa\_ d1tdqb\_ d3ubua\_ d1c3ab\_  
d1h8ua\_ d3bx4b\_ d1t8ca1 d1sb2a1 d1qdda\_ d2ziba1 d3cada\_ d1byfa\_  
d1j34b\_ d1jwia\_ d1jzna\_ d1c3aa\_ d1oz7b\_ d1wmza\_ d3bdwb\_ d1hq8a\_  
d1fifa1 d1dv8a\_ d3hupa\_ d1wk1a1 d1umra\_ d2afpa\_ d3bx4a\_ d1gz2a\_  
d1s16a\_ d1v7pb\_ d3g8ka\_ d1ixxa\_ d1j34a\_ d1jwib\_ d1g1sa1 d1y17a1  
d1ja3a\_ d1fvub\_ d3bdwa\_ d1sb2b1 d1fvua\_ d1umrc\_ d1oz7a\_ d4m17a\_  
d3cfwa1 d1ypqa1 d1g1ta1 d3fd4a\_ d3l9jc\_ d4dn8a1 d1v41b\_ d1rd11\_  
d2msba\_ d1dzka\_ d4tlja\_ d2a2ua\_ d4wfva\_ d3t1da\_ d4iixa\_ d3zq3a\_  
d2nnda\_ d1i4ua\_ d1kxoa\_ d1bbpa\_ d1kt7a\_ d1exsa\_ d3s26a1 d1lf7a\_  
d4gh7a\_ d1z24a1 d1qabe\_ d1xkia\_ d1ew3a\_ d3bx7a\_ d4iawa1 d1n0sa\_  
d1gkab\_ d3kzaa\_ d2k23a\_ d2l9ca1 d2joza1 d1gm6a\_ d3kffa\_ d3saoa1  
d1e5pa\_ d1yupa1 d1iiua\_ d1pfsa\_ d2a1ka\_ d1je5a\_ d2shpa1 d1yfoa\_  
d1l8ka\_ d2ooqa1 d1g4us2 d1p15a\_ d1lara2 d1lara1 d1wcha\_ d2fh7a2



d2fh7a1 d1ohea1 d1ohea2 d2f4da\_ d1rxda\_ d2hxpa\_ d1xria\_ d1d5ra2  
d1fpza\_ d3ezza\_ d4y2ea\_ d1i9sa\_ d1tdha3 d1q3ba3 d1k82a3 d4qmea2  
d2xdt2a d1z5ha2 d3ubra\_ d1qo8a1 d1d4ca1 d2k3va\_ d1ft5a\_ d1qdba\_  
d1mlqa\_ d2j7aa\_ d1h21a\_ d1ogyb\_ d4fasa\_ d1jnia\_ d1oaha\_ d1sp3a\_  
d1eysc\_ d3h33a\_ d1rwja\_ d19hca\_ d1os6a\_ d3bxua\_ d3h4na\_ d1i77a\_  
d3caoa\_ d1j0pa\_ d2ctha\_ d1duwa\_ d1ofwa\_ d2e84a\_ d1hh5a\_ d3h34a\_  
d2dara2 d2dara1 d1wyha2 d2dloa2 d1rutx4 d1rutx3 d2cuqa2 d1x41a2  
d1x41a1 d1x3ha2 d1x3ha1 d2d8za1 d1x61a2 d1x6aa1 d1x6aa2 d2cora2  
d2cora1 d1v6ga1 d1v6ga2 d2d8za2 d1x64a1 d1x64a2 d1b8ta1 d2co8a1  
d1x63a2 d2dj7a2 d2dj7a1 d2cu8a2 d2cu8a1 d1g47a2 d1g47a1 d1j2oa1  
d1wyha1 d2dloa1 d1wiga1 d1wiga2 d2cupa2 d2cupa3 d1x68a1 d2d8ya2  
d2d8ya1 d1m3va2 d1x62a1 d1x68a2 d1x61a1 d1b8ta3 d1b8ta2 d2d8xa2  
d2d8xa1 d1x4ka1 d1x4ka2 d2cuqa1 d1m3va1 d2co8a2 d1j2oa2 d1x63a1  
d2cura1 d2cura2 d1x62a2 d1op9a\_ d1y01a1 d1etzb1 d1legj11 d2gsib1  
d1nj9a1 d4jfh1 d1aqk11 d1t2ja\_ d1l04h1 d1zvya1 d3v4v11 d4enec1  
d1kxtb\_ d5e8ea1 d2pxya\_ d4weud\_ d1xiwc\_ d2esvd1 d1qnzh\_ d1logae1  
d1f4xh1 d4n1hb\_ d3ezjb1 d3mlw11 d1kfah1 d1etza1 d1b4jh1 d3cfic\_  
d4w68a\_ d2arja1 d1ek3a\_ d2ok011 d1vera\_ d1uwgh1 d1blnb1 d1fpth1  
d1rzga1 d2giya1 d4m3kb1 d1nc2a1 d2nyyd1 d1ncna\_ d1fbih1 d5dxwa\_  
d4fqqa1 d1dqdh1 d1jfq11 d1kelh1 d1faih1 d1frg11 d1fig11 d4m6n11  
d1fo0a\_ d4hxbl1 d3b5ga\_ d3quyd1 d2h9gb1 d1i8kb\_ d2dd8h1 d2ck0h1  
d1eaja\_ d4w6wb1 d2a6ib3 d1t66d1 d2e27h\_ d1ob1b1 d1f11b1 d2v7na1  
d2xt1b1 d1pskh1 d4i13b1 d2op411 d1a0q11 d1uwel1 d1za3a1 d1ncb11  
d4uu9a\_ d1bm3h1 d1cloh1 d1nqba2 d1cf8h1 d4y5va\_ d1mhph1 d5anma1  
d4cdgc1 d4ldeb\_ d1y01b1 d2pcpb1 d1z3g11 d1dfb11 d1fh5h1 d3g5xa1  
d1tzib1 d4dn311 d3zhka1 d2b1hh1 d2uyla1 d1f3dh1 d1nj9b1 d2agjh1  
d2h1p11 d1q72h1 d8fab11 d1ndmb1 d1rjca1 d4u6hb1 d3upca\_ d2fbj11  
d1osph1 d1tvda\_ d2cjev\_ d4fhbd1 d1bd2d1 d1rz7h1 d3nn8a\_ d1blna1  
d1knoa1 d1nfda1 d2bmkb1 d1dq11\_ d1igyb1 d1igf11 d12e8h1 d3utza1  
d1nc2b1 d1rihh1 d4mwfb1 d4jvpa1 d1mieh1 d1rhfa1 d1fgn11 d1sbsh1  
d1lp9e1 d1dn0a1 d4lqf11 d1iaih1 d1kgcd1 d1mh5b1 d1gpol1 d2g60h3  
d1f8t11 d2jixd1 d4grwh\_ d1fo0b\_ d1bfob1 d1axsa1 d1u9ka\_ d1nmbh\_  
d1h8na1 d1h8na2 d1jguh1 d4eura1 d3sdy11 d35c8h1 d1w7211 d1mvub\_  
d1i9rh1 d1ob1a1 d4wenb\_ d1yeeh1 d3ietc1 d1f58h1 d1ad0b1 d1mqk1\_  
d1nbvh1 d4b50a\_ d3r8bb\_ d1baf11 d1mamh1 d4rgne1 d2gsgb\_ d35c811  
d1bafh1 d1ai1h1 d2pcpa1 d2fath1 d2x1pa\_ d1orsb1 d1libg11 d1shma\_  
d1a2yb\_ d1u0qa\_ d2coqa\_ d1hilb1 d1qfwi\_ d1jv5b\_ d1fn4b1 d5e0qa\_  
d1nsnh1 d1plg11 d4ocx11 d1kb5h1 d1rzhf1 d1pg7x1 d2fx7h1 d2oi9c\_  
d1l7i11 d3eyva1 d1d5i11 d4ffyl\_ d1tet11 d1a6wh\_ d1ac6a\_ d3dvfa\_  
d1nfdel d1mimh1 d1ri8a1 d1jhlh\_ d3dura\_ d1fskb1 d1f97a1 d3so3b1  
d2ak4d1 d1lp9f1 d4z7wf1 d1l7th1 d4y5ya\_ d4x7ec1 d1emth1 d1ikf11  
d1nlbh1 d4utal1 d1bjma1 d1eapb1 d1u6ah1 d2dtgd1 d1kj2b\_ d1xeda1  
d1cleh1 d1fgvh\_ d2bnub1 d2fb4h1 d2dtgb1 d1ktrh\_ d1jpth1 d1qkz11  
d4hepg\_ d2atpb1 d1flrh1 d2hrp11 d1mvfa\_ d1iaim1 d3k80a1 d2jb5h1

d3zkxc\_ d4grwe\_ dlit9h1 d1rhbb1 d3w9ec\_ d1e4wh1 d1sy6h1 d2j6eh1  
d3qxta\_ dljglh1 d1p7ka1 d1tzhb1 d4n8pa1 d1gaf11 d2jelh1 d1wioa2  
d4i0cc1 d1cicb1 d1lmka2 d1lmka1 d1iqwh1 d1orqb1 d1ejoh1 d1jnlh1  
d4zgl1\_ d43c9b\_ d1ggbl1 d1wejh1 d3q6fa1 d1f3dj1 d3c6la1 d1bqlh1  
d3p9wb\_ d1a3r11 d1h0db1 d2uzil\_ d1eo811 d1qfwl\_ d1n7ml1 d1igja1  
d1c5ch1 d2a9mh\_ d1rmfh1 d1fj1b1 d4heme\_ d1ccza1 d1a5fh1 d1ogad1  
d1dlfh\_ d1qa9b\_ d1vgel1 d3qskb\_ d1sjxa\_ d4ozfg1 d1sq2n\_ d1qd0a\_  
d1kcvh1 d1c5db1 d3qcull d8faba1 d3bn9d1 d1mjuh1 d4y8dc\_ d7fabh1  
d3dvgb1 d1lo011 d1a6tb1 d1gigh1 d1kcrh1 d2hwz11 d1yjdc1 d3clfl1  
d4krna\_ d1d171\_ d1e6ol1 d1mexh1 d3r0ma\_ d4kkna\_ d1fnsl1 d1loaqh\_  
d1rzia1 d1lucbh1 d1ncw11 d4b41a\_ d1nfd1 d2mpah1 d2d7t11 d4grwf\_  
d4b5ea\_ d1lk3h1 d3u79a\_ d4u3xa\_ d1ghf11 d1bvkb\_ d1mcww1 d1b88a\_  
d1jrrh1 d32c2b1 d4wemb\_ d1dsfh\_ d1op3h1 d1ce111 d1iqda1 d1qoka1  
d1qoka2 d1qfuh1 d2crya1 d1ay1h1 d1oaql\_ d3ab0b\_ d1rur11 d1t4kb1  
d1bz7b1 d1n0xh1 d1for11 d1lucb11 d4w6yb\_ d43c9a\_ d2aab11 d1tzia1  
d4n1ca\_ d1k6qh1 d3g9ab\_ d4tvsa1 d1ligmh\_ d1pz5b1 d3dx9a1 d3wxwh\_  
d1nakh1 d1kcul1 d3eaka\_ d4qlra1 d1cr911 d1d9ka\_ d1f4x11 d1deea1  
d2i27n2 d1c12a1 d2orb11 d1j8hd1 d1mcp11 d1c5da1 d1kenh1 d1bd2e1  
d1h5ba\_ d4x7fc1 d3upaa\_ d1t3fa1 d1indh1 d2dtgc1 d4hc111 d1zv5a1  
d4wgvb\_ d1uwgl1 d4f37k1 d1aqkh1 d1vesa\_ d3zkqd\_ d1fpt11 d1lo411  
d1knob1 d3rrqa\_ d1ct8b1 d4orz\_ d1mlbb1 d4hgkc1 d1dqdl1 d1bogb1  
d4ozhe1 d1dr9a1 d1i7za1 d1dn0b1 d1kell1 d1rzib1 d1ypzf1 d1wtla\_  
d1hkfa\_ d1fail1 d1figh1 d2vyre\_ d1sjva\_ d1ohqa\_ d1bfoa1 d1pkqb1  
d1mjul1 d1b4j11 d1nsn11 d2arjb1 d1p4bh\_ d4aj0a\_ d3nn8b\_ d2rcja1  
d1f2xk\_ d4v1dd\_ d1adqh1 d2eksa\_ d4k3ga\_ d1jfqh1 d1uweh1 d1frgh1  
d4gftb\_ d1uz8b1 d4n1ea\_ d1bm311 d1clol1 d3mcka1 d2vq1a1 d1ae6h1  
d4aq1b1 d1uj3b1 d1nbqa1 d1fh511 d2ck011 d2ywza\_ d1q7211 d4nbxb\_  
d1hila1 d4hz1b1 d2j8811 d1zmya1 d1cd0a\_ d1a4ka1 d1psk11 d1a0qh1  
d4krmb\_ d1ncbh1 d2fbjh1 d1j8he1 d1i3ua\_ d1cf811 d1fe8h1 d2p1ya1  
d1eeqa\_ d2x89a\_ d1ol0a\_ d2r0lh1 d1ub5a1 d1dfbh1 d3eyvb1 d4jdvb1  
d4p2cg\_ d2gsia1 d2agj11 d1u3ha1 d2h1ph1 d1rih11 d1fskc1 d1boga1  
d2a7711 d1ospl1 d1qfoa\_ d3dwta\_ d2fx711 d1rz711 d3stba1 d1pkqa1  
d1b6da1 d1dzba2 d1dzba1 d1kj2a\_ d4l1ha\_ d1rzgb1 d1dq1h\_ d12e811  
d1miel1 d1jmaa\_ d1sbs11 d1fgnh1 d1f5811 d1mqkh\_ d1ndgb1 d3qeg11  
d1ia11 d2aw2a1 d1tqbc1 d3fo2a1 d4dkaa\_ d1f8th1 d2g6011 d2ywya\_  
d1uj3a1 d1yc7a\_ d3bd3a\_ d4w6xb1 d1nmb1\_ d1i8ka\_ d1rj1b1 d1ypze1  
d1p7kb1 d1kxqe\_ d1gpoh1 d2z4qa1 d1w72h1 d1i9r11 d4qgya1 d4xt1c\_  
d2qqnh1 d1cica1 d3c08h1 d2cd0a\_ d2bdnh1 d1hnga1 d1mam11 d1nldh1  
d1cr9h1 d4lcih1 d3bkyh1 d3qg711 d1ai111 d1kxvc\_ d4iosd\_ d1l7ih1  
d2x1qa\_ d1ub6b1 d3k74b\_ d1libgh1 d1teth1 d1igya1 d1hxma1 d2x6ma\_  
d2e71a\_ d5e03a\_ d1qfwm\_ d2r0kh1 d1igjb1 d1rurh1 d1plgh1 d1mj8h1  
d1yuhb1 d3fmg11 d1rzf11 d1emtl1 d1ad9b1 d1igtb1 d1nlb11 d1d5ih1  
d3k7ua\_ d4ffyh\_ d1bwwa\_ d3dvga1 d1a6ta1 d1fgvl\_ d4qxgl1 d1mim11  
d1jh11\_ d2hffb1 d2hh011 d1qkzh1 d1l7t11 d1afvh1 d1iaii1 d2cjuh\_

d1um5h1 d2ghwb2 d2ghwb1 d1kgce1 d2fgwh1 dlikfh1 d1dvfd\_ d2i24n1  
d2xtjb\_ d1za3b1 d2yc1a\_ d2hh0h1 d2x1oa\_ d1bvka\_ d1rjla1 d5e7ba1  
d1igta1 d1i11b1 d2fb4l1 d1mvua\_ d1jpt11 d32c2a1 d1fvca\_ d1iqdb1  
d2hrph1 d2p4ab\_ d4qo1a\_ d1p2cb1 d1wt5c\_ d1t4ka1 d5c1mb\_ d1it9l1  
d1bz7a1 d1b2wh1 d1e4wl1 d1jnl11 d1yedb1 d1za6b1 d3u7aa\_ d1igfh1  
d3gnm11 d1orsa1 d1wejl1 d1a2ya\_ d1hxmb1 d1gafh1 d2j4wh1 d1pz5a1  
d1j05a\_ d1a3rh1 d4fq1l1 d1qfwh\_ d1eo8h1 d1n7mh1 d4s11a\_ d1kegh1  
d5da4a\_ d1iqwl1 d3whxb1 d1vgeh1 d1deeb1 d1c12b1 d1t2ql1 d1ad9a1  
d3gsnb1 d3b2uc1 d1ggbh1 d1t3fb1 d1nak11 d4ocmc\_ d1lila1 d2v7hb3  
d2esve1 d1mcoh1 d2qr0b1 d2q3aa\_ d1ct8a1 d1kcrl1 d2pxyb\_ d2uzih\_  
d5c3ld\_ d3durb\_ d1c5cl1 d2ak4e1 d1d17h\_ d1xiwd\_ d1mlba1 d1rmfl1  
d1i7zb1 d1dlfl\_ d2xa3a\_ d5bq7b1 d1dqqb1 d3h42l1 dlegjh1 d1kcvl1  
d1fe8l1 d2j6e11 d1f3rb2 d1l1k3l1 d1sm3h1 d1q0xh1 d1ghfh1 d7fabl1  
d1igch1 d1l00h1 d4idla\_ d5c2b1\_ d1jrh11 d1l11a1 d3zhda1 d4kfzc\_  
d1b0wa\_ d1e6oh1 d1mex11 d4krpb\_ d1fnsh1 d1ncwh1 d4hgma\_ d4eigb1  
d4rzca\_ d2mpal1 d4y5xa\_ d5en2b1 d3lrga1 d4ej1c1 d1rhha1 d1j05b\_  
d1forh1 d1q9wb1 d2wzpd\_ d2aq2a1 d1h0da1 d3revb1 d2ij0c1 d1tzh1  
d4m7jl1 d1k6ql1 d3b9kc1 d1igml\_ d3qeua1 d1dsfl\_ d1celh1 d1kcu1  
d1zvha1 d1zvoa1 d1tqbb1 d1ay1l1 d2qsc11 d2cgrh1 d1n10h1 d1ken11  
d3eo0a1 d4n9ob1 d1n0xl1 d3k1kc\_ d2m9wa1 d3dfxa\_ d2aq2b1 d1ck1a1  
d1enf1 d1i4pa1 d1v1oa1 d1et9a1 d1esfa1 d2g9hd1 d4ohja1 d1klud1  
d1bxta1 d1eu3a1 d1ty0a1 d1fnua1 d2cqva1 d1fhga\_ d2k1ma\_ d2dl2a1  
d1biha3 d1biha1 d1biha4 d3qp3a1 d1glca\_ d1gxea\_ d1cvsc2 d1cvsc1  
d1xmwa2 d1m4ka2 d2otpa2 d1biha2 d1rhfa2 d2fcba2 d2fcba1 d1gsma2  
d1lepfa1 d1lepfa2 d2dava1 d1waaa\_ d1f97a2 d1x44a1 d1vcaa2 d1fnla2  
d1fnla1 d3b5ha2 d3h8na2 d3h8na1 d1bjba1 d1bjba2 d1pd6a\_ d1f2qa2  
d1f2qa1 d3cx2a\_ d1nbqa2 d3b5ha1 d1n26a1 d1xiwb\_ d1xaua\_ d1fltx\_  
d2ifga1 d1olla1 d1olla2 d1cs6a4 d1cs6a3 d1cs6a2 d1cs6a1 d2gw5a2  
d1sy6a1 d1xiwa\_ d1lucta2 d1lucta1 d1ry7b2 d1gl4b\_ d1qz1a3 d1olza1  
d2c9aa1 d1wwca\_

**Family-27 (b.29.1.2)**

**Positive dataset contains 9 protein sequences.**

d3azya\_ d3wvja\_ d1upsa1 d2hyka\_ d2vy0a\_ d3o5sa\_ d3d6ea\_ d3atga\_  
d3i4ia\_

**Negative dataset contains 3988 protein sequences.**

d1m32a\_ d1libja\_ d1c7na\_ d1iuga\_ d4q75a\_ d2bkwa1 d1t3ia\_ d1n8pa\_  
d1qz9a\_ d1jff9a\_ d1p3wa\_ d3kgwa\_ d1c11a\_ d2ctza1 d1vjoa\_ d2rfva\_  
d1gc0a\_ d1cs1a\_ d1d2fa\_ d2ch1a1 d1qgna\_ d1pffa\_ d1elua\_ d1u08a\_  
d1lc5a\_ d2ay1a\_ d1bw0a\_ d3pd6a\_ d7aata\_ d2csta\_ d1j32a\_ d1fg7a\_  
d4wlha\_ d1o4sa\_ d1v2da\_ d1gdea\_ d1m6sa\_ d1v72a1 d1svva\_ d1ajsa\_  
d1wsta1 d2f8ja2 d1l1k9a\_ d1vp4a1 d1xi9a1 d2gb3a1 d1yaaa\_ d2bnma2  
d1jx4a2 d3gv5b1 d1t94a2 d3bq0a2 d3i2ka1 d1lnsa3 d1mpxa2 d1xkta1  
d2hfka\_ d1jmkc\_ d5d3ka\_ d4nmwa\_ d1ddla\_ d1e57b\_ d1auyb\_ d1f56a\_  
d1bypa\_ d1azca\_ d1ws8a\_ d3u25a\_ d1cuoa\_ d1id2a\_ d1rkra\_ d2iaac\_

d4dp1x\_ d1nwp\_ d2gima\_ d2i7sa\_ d1qhqa\_ d3ehbb1 d1fftb1 d1gyca3  
d1hfua2 d1kbva1 d1kbva2 d1sdda1 d1sdda2 d1gyca2 d1mzya1 d2bw4a1  
d1aoza1 d1aoza3 d1aoza2 d1kyaa2 d1kyaa3 d1kyaa1 d1mzya2 d4e9sa1  
d1sddb1 d1sddb2 d1hfua1 d1hfua3 d1oe1a2 d1oe1a1 d1v10a2 d1v10a3  
d1v10a1 d2b5ea2 d2b5ea3 d2b5ea1 d2b5ea4 d2kp1a1 d2kp2a1 d1hyua3  
d1hyua4 d1j08a1 d1j08a2 d2cfba1 d1dfoa\_ d1o69a\_ d1bj4a\_ d3k28a\_  
d2bwpa\_ d3lg0a\_ d2fnua\_ d3ou5a\_ d1z7da1 d1b9ha\_ d4msoa\_ d1bs0a\_  
d1s0aa\_ d1sffa\_ d3tqxa\_ d1mdoa\_ d3qboa\_ d3pgya\_ d1bjna\_ d2dkja\_  
d1ejia\_ d1vefa1 d4wxga\_ d3bs8a\_ d3gbxa1 d1w23a\_ d1a3qa1 d1iknc\_  
d3brda1 d1p7h11 d1oy3c\_ d1imhc1 d1zk9a1 d2cxka1 d2h0va\_ d1zx5a1  
d1mqta\_ d1d4m3\_ d1fmd3\_ d2mev1\_ g1aym.1 d1ev13\_ d4q4w1\_ d1rla3\_  
d2x5ia\_ d1rhi1\_ g1rla.1 g1d4m.1 g1rhi.1 d1b35b\_ d1loopa\_ d1tme1\_  
d4iv1a\_ g1pvc.1 g1fpn.1 d1fpn1\_ d4gb31\_ d1d4m1\_ d1fmd1\_ d1ev11\_  
d2wzr3\_ g1cov.1 d1qqp3\_ g1fmd.1 d2x5ic\_ d1rhi3\_ g1loop.1 d1hxs1\_  
g1hxs.1 d1fpn3\_ d1bev1\_ g2mev.1 d1eah3\_ d1aym1\_ d1pvc3\_ d1qqp1\_  
d1zba3\_ d1h8ta\_ d3vbhc\_ g1b35.1 g1bev.1 d1hxs3\_ g1ev1.1 d1bev3\_  
g1tmf.1 d1tmf1\_ d1b35a\_ d2mev3\_ g1eah.1 g1h8t.1 d1eah1\_ d4q4w3\_  
d1rla1\_ d1aym3\_ d1zba1\_ d1h8tc\_ d1loopc\_ d1tme3\_ g1qqp.1 d4iv1c\_  
g1tme.1 d1ep0a\_ d2pa7a1 d1wlta1 d1nxma\_ d2c0za1 d1ds6b\_ d1fstb\_  
d1ex0a1 d1g0da1 d1ju8a\_ d1v70a\_ d2f4pa1 d1yhfa1 d1tafa\_ d1bh9b\_  
d1tafb\_ d1jfib\_ d1q9ca\_ d1h3ob\_ d2byka1 d1n1ja\_ d4g92b\_ d1bh9a\_  
d1jfia\_ d1h3oa\_ d2bykb1 d2bjca1 d2hsga1 d1qpza1 d1r0ka3 d1j5pa3  
d1vkoa2 d1vm6a2 d3qvsa2 d1gr0a2 d3gpdg2 d2q49a2 d1hdgo2 d2g17a2  
d2cvoa2 d2czca1 d3pwka2 d1obfo2 d1i32a2 d1zyao2 d2pkgo2 d1b7go2  
d2hjsa2 d1cf2o2 d1vkna2 d1ux8a\_ d1dlya\_ d4i0va\_ d2bkma\_ d1dlwa\_  
d2bmma\_ d2msya\_ d2djoa1 d2r5za\_ d1au7a1 d1f43a\_ d2lmda1 d1akhb\_  
d1s7ea1 d3nara\_ d1zq3p1 d2craa1 d1mija\_ d4uuta\_ d3a01a\_ d1x58a1  
d3rkqa1 d3cmya1 d2cqxa1 d2da6a1 d1e3oc1 d1fjla\_ d1mh3a1 d1ig7a\_  
d1x41a1 d1wh7a1 d1gt0c1 d2mw8a\_ d1lfup\_ d1x2ma1 d1b72a\_ d1wi3a1  
d1jgga\_ d1wjha1 d1x2na1 d1mnm\_ d2cuea1 d3k2aa\_ d2hosa\_ d2jwta2  
d1pufa\_ d1octic1 d2hi3a\_ d1b8ia\_ d4j19a\_ d3lnqa\_ d1wh5a1 d1b8ib\_  
d1fexa\_ d2cqra1 d1guua\_ d1ug2a1 d2cqqa1 d2ajea1 d4a69c\_ d1h8ac1  
d2crga1 d2iw5b1 d1xc5a1 d1ofcx1 d2cu7a1 d1wgxa1 d2cjja1 d2ckxa1  
d1igna2 d2iu5a1 d1zk8a1 d2g7sa1 d2fd5a1 d2np5a1 d1z0xa1 d2id6a1  
d2d6ya1 d2i10a1 d2oi8a1 d3c07a1 d2ns7a1 d2fq4a1 d2yvea1 d1t33a1  
d2o7ta1 d1rkta1 d2np3b1 d2g7ga1 d2gena1 d2fbqa1 d2g71a1 d2gfn1  
d2g3ba1 d2jj7a1 d2hyja1 d1sgma1 d1ui5a1 d2hkua1 d2id3a1 d4jyka1  
d3lv8a\_ d1s3ga1 d1zaka1 d1s4qa\_ d3tvta2 d1uf9a\_ d1khta\_ d1ckea\_  
d1osna\_ d1p5zb\_ d3cm0a\_ d1tmka\_ d1jaga\_ d3h86a\_ d1t0hb\_ d1nn5a\_  
d2h92a\_ d3kb2a1 d2c95a1 d1yj5a2 d1kgda\_ d1ly1a\_ d2ak3a1 d1vyva2  
d1deka\_ d2grja1 d1p3ja1 d1y63a\_ d1e4ya1 d1s96a\_ d3iija1 d1lvga\_  
d1nksa\_ d1vyua2 d4e22a\_ d1qf9a\_ d1jjva\_ d1q3ta\_ d1ki9a\_ d1lw7a2  
d1teva\_ d1kjwa2 d1gsia\_ d2iyva2 d1kaga\_ d1viaa\_ d1e6ca\_ d1g3ma\_  
d1j99a\_ d1t8ta1 d1nsta\_ d1zrha\_ d1ls6a\_ d2a3ra\_ d1aqua\_ d2zptx\_

d3ckla\_ d1texas\_ d1q44a\_ d2gwha\_ dlz0ja1 d3umra2 d3gj0a1 d2gaoa1  
d1yzga1 d1x3sa1 d1g7sa4 d1puja\_ dludxa2 d1kk1a3 d2o52a\_ d1jwyb\_  
d1zcaa2 d1zcba2 d2fv8a1 d2cjwa\_ d3dz8a1 d1xzpa2 d1vg8a\_ d4qxaa\_  
d2ewla1 d1x1ra1 d2bcgy\_ d3doea1 d3cona\_ d3rega\_ d3wyga\_ d1upta\_  
d2b6ha1 d1zd9a1 d1lnza2 d1r5ba3 d1n0ua2 d1r2qa\_ d2f91a1 d2rhda\_  
d3q3jb\_ d3q85a\_ d1efma1 d1r8qa\_ d2gf9a1 d2akab1 d1ek0a\_ d1z08a1  
d2gcoa1 d2dy1a2 d4g01b\_ d2cxxa1 d1svia\_ d3q72a\_ d1ni3a1 d4ac9a4  
d2erxa1 d2bmea\_ d1wxqa1 d2gf0a1 d4ldja1 d1zunb3 d4lv5b\_ d1efca3  
d1kmqa\_ d2g6ba1 d3lrpa\_ d1tada2 d2y8ea\_ d4rd4a1 d1z06a1 d2heia\_  
d3a58b\_ d1u01a2 d1d2ea3 d1zj6a1 d2ocba\_ d3rwoa\_ d1mr3f\_ d2e9sa1  
d4u5xa1 d2iwra\_ d2fn4a1 d3bwdd\_ d2nzja1 d2atva1 d2ksqa\_ d3l43a\_  
d1mkya2 d1mkya1 d1wmsa\_ d1jnja3 d2rmka\_ d1f6ba\_ d1f60a3 d1gota2  
d1jala1 d2fh5b1 d1g16a\_ d2wblc\_ d1m7ba\_ d1wf3a1 d1f5na2 d1t9ha2  
d1z6xa1 d1z0aa1 d2fg5a1 d2a5ja1 d2bcjq2 d1s0ua3 d1ky3a\_ d4y0va\_  
d4lhwa\_ d2qmea1 d2atxa1 d1egaa1 d1ryha\_ d1moza\_ d1nrjb\_ d2erya1  
d3bfka\_ d1puia\_ d1fzqa\_ d3j3az1 d3t5ga\_ d1shza2 d3defa\_ d2f7sa1  
d3raba\_ d3tsoa\_ d3aq4a\_ d2a17a1 d3sfva1 d3bc1a\_ d2ncda\_ d1sdma\_  
d3h4sa1 d2heha\_ d2grya\_ g3kin.1 d1kk8a2 d1br2a2 d1goja\_ d1f9va\_  
d2mysa2 d1lkxa\_ d3t0qa\_ d4db1a1 d3gbja\_ d1ry6a\_ d1v8ka\_ d1k8ka2  
d1k8ka1 d3uleb1 d3i33a2 d3i33a1 d1bupa1 d1dkgd2 d1dkgd1 d4ci6a2  
d1jcfal d4a2ba2 d2fxua1 d1yaga2 d1yaga1 d4cbua2 d1bupa2 d1lig8a1  
d1czan2 d1czan3 d1czan1 d1lig8a2 d1czan4 d1bg3a4 d1bg3a2 d1bg3a1  
d3h1jd1 d2d0oa3 d2d0oa2 d1nbwa3 d1hroa\_ d4gedb\_ d3zooa\_ d1mz4a\_  
d1gu2a\_ d1f1fa\_ d1dvva\_ d1c6ra\_ d1c75a\_ d1e29a\_ d1gdva\_ d1cnoa\_  
d1h32b\_ d1co6a\_ d2bh4x\_ d2aiua\_ d5cytr\_ d1jdl\_ d1i8oa\_ d2zboa\_  
d3dmia\_ d1ls9a\_ d1wvec\_ d2yk3a\_ d3ph2b\_ d1dw0a\_ d5aura\_ d1ql3a\_  
d1qn2a\_ d1f1ca\_ d1prtc2 d1cnt1\_ d1pvhb\_ d1z7ca\_ d1huwa\_ d1bgea\_  
d1rhga\_ d1f6fa\_ d1f45b\_ d1i1rb\_ d1axia\_ d1etea\_ d3tgxb\_ d1scfa\_  
d2z3qa1 d3qb1a\_ d1hula\_ d1m48a\_ d4nkqb\_ d1v7mv\_ d5e4ea\_ d2o27a\_  
d3b5ka\_ d2psma1 d4zf7a\_ d3uf5a\_ d1v8fa\_ d2ejca\_ d3muea1 d1lihoa\_  
d3q12a1 d4dnxa2 d1v47a2 d1g8fa2 d1jhda2 d1x6va2 d3rbaa\_ d2qtra\_  
d1nupa\_ d3l92a\_ d1f9aa\_ d1qjca\_ d2h29a\_ d1vlha\_ d1od6a\_ d1lw7a1  
d1mrza2 d4ruka\_ d2el7a\_ d1liq0a2 d1irxa2 d1r6ta2 d2cyba\_ d1rqga2  
d1j09a2 d2yxna\_ d1f7ua2 d1h3fa1 d1ffya3 d2g36a1 d1nzja\_ d1jila\_  
d1n3la\_ d1i6la\_ d1pfva2 d1h3na3 d3n9ia\_ d3sz3a1 d3sw2a\_ d1moxc\_  
d1dx5i3 d1edmb\_ d1aut12 d1aut11 d1nqlb\_ d1dva11 d1szba2 d1kigl\_  
d2y5f1\_ d1ijqa2 d1gk5a\_ d1g1sa2 d1xdtr\_ d1lmja2 d1lmja1 d1nzia2  
d2wphe\_ d1klil\_ d1pfx12 d1pfx11 d1p9ja\_ d1g1ta2 d1f7ea\_ d4yzub\_  
d2mgpa1 d1b9wa2 d2mgpa2 d1obl1c1 d1obl1c2 d1nlia2 d1nlia1 d2npra2  
d2npra1 d1gl4a2 d1qx2a\_ d1lig5a\_ d2y5ia\_ d1qlsa\_ d1psra\_ d3n22a\_  
d2egda\_ d4ggfc\_ d2wcea\_ d2luca\_ d4aqia\_ d3nsia\_ d2lp3a\_ d1j55a\_  
d1a4pa\_ d1k8ua\_ d1nsha\_ d1pvaa\_ d3fs7a\_ d2pvba\_ d1ttxa\_ d1rwya\_  
d2kyfa\_ d1rk9a\_ d1a75a\_ d1lexra\_ d1tiza1 d1nyaa\_ d1g8ia\_ d1ggwa\_  
d1wdcc\_ d3fwba\_ d1ggza\_ d2o5ga\_ d1ctaa\_ d1m45a\_ d3i5gc\_ d1sl8a\_

d1fpwa\_ d2scpa\_ d2roaa\_ d4aqra\_ d3pn7b\_ d1br1b\_ d2mysb\_ d1s6ca\_  
d1bjfa\_ d2obha\_ d1jfk\_ d1jfoa\_ d1qv0a\_ d1lkja\_ d2mlfc\_ d2m97a\_  
d2d8na\_ d4by5a\_ d1jbaa\_ d4nqga\_ d2mysc\_ d1j7qa\_ d1s6ia\_ d1uhka2  
d1r2ua\_ d1dtla\_ d3kf9a\_ d3pn7c\_ d1qjta\_ d1fi6a\_ d1c07a\_ d5d67d\_  
d1tuza\_ d1h8ba\_ d1eg3a1 d1eg3a2 d2zkmx1 d1snla\_ d1gjya\_ d1y1xa\_  
d1dvia\_ d1df0a1 d1qxp2 d4usla\_ d1k94a\_ d1sfsa\_ d1wkya2 d1uuqa\_  
d3wh9a\_ d4m1ra\_ d1xyza\_ d4xuya\_ d2je8a5 d4bf7a1 d3cuia\_ d1ur4a\_  
d1odza\_ d2vzsa5 d1bqca\_ d2x2ya1 d1hjqa\_ d1qnra\_ d4y7ea1 d1vjza\_  
d4k68a\_ d2v3ga\_ d4hpga\_ d1nofa2 d1nq6a\_ d1h4pa\_ d1aq0a\_ d3ziza\_  
d4bs0a\_ d1ecea\_ d1h1na\_ d1ta3b\_ d1w91a2 d1ilwa\_ d1uhva2 d1us3a2  
d1egza\_ d7a3ha\_ d1tvna1 d3nyda1 d1ghsa\_ d2cyga1 d4xv0a\_ d2c8na2  
d1w32a\_ d3emca\_ d1v6ya1 d1foba\_ d2uwfa1 d2fgla\_ d3niya1 d2c0ha1  
d1rh9a1 d1yq2a5 d1szna2 d1fa2a\_ d1pama4 d5do8a1 d1ea9c3 d1hx0a2  
d2fhfa5 d1qhoa4 d1avaa2 d1m53a2 d4m8ua1 d2gjpa2 d1lwha2 d4howa1  
d1ktba2 d1j0ha3 d3vm5a1 d2x1ia\_ d1wzaa2 d1uasa2 d2diea1 d1mxga2  
d1ht6a2 d1eswa\_ d1iv8a2 d5cpsa\_ d1ud2a2 d1zjaa1 d3gbea1 d1kwga2  
d1wdpa\_ d1gcy2 d1g5aa2 d1hvxa2 d3dhpa2 d2bhua3 d4do4a1 d3qgva1  
d1e43a2 d1g94a2 d2d3na2 d1gjwa2 d1gvia3 d1x1na1 d1r7aa2 d1tz7a1  
d4toqa\_ d1wb0a1 d1w9pa1 d1eoka\_ d1itxa1 d1kfw1 d1goia2 d2gsja\_  
d1hjxa1 d1jnda1 d1vf8a1 d1etob\_ d1umqa\_ d1g2ha\_ d1mixa2 d1e5wa2  
d1j19a2 d1isna2 d2a16b2 d1g4ma1 d1g4ma2 d1x14a1 d3vsqa\_ d2gixa1  
d1p7ba1 d1iuka\_ d2csua1 d3q9ub\_ d2yv1a1 d3q9na\_ d2d59a\_ d1oi7a1  
d2yv2a1 d1euca1 d1y81a1 d1wgqa1 d1v89a1 d2coda1 d1zc3b\_ d1wg7a1  
d1u5ea1 d1v61a1 d2coca1 d2ys1a1 d1v5pa1 d1ntya2 d1wjma1 d1wila1  
d1u29a\_ d1xx0a1 d1unqa\_ d2zkmx3 d1fhoa\_ d1v88a1 d2adza1 d1x1fa1  
d1p6sa\_ d2coaa1 d1btka\_ d1v5ma1 d1faoa\_ d2x18a\_ d1dyna\_ d1x1ga1  
d4kaxb\_ d2j59m1 d1xcga2 d1txda2 d1u5da1 d1dbha2 d1wlha\_ d1upqa\_  
d1v5ua1 d1foea2 d2fjla1 d1eaza\_ d2dfka2 d2cofa1 d1kz7a2 d9ldta1  
d2ewda3 d1up7a1 d2dfda1 d1s6ya1 d1vjta1 d7mdha1 d1hyea1 d1t2da1  
d1oj3a3 d1b8pa1 d1ldna1 d1hyha1 d1civa1 d2a92a1 d1ez4a1 d1i0za1  
d1y6ja1 d1gv0a1 d1ur5a1 d1lllda1 d1lobba1 d1v8ba1 d1gdha1 d1l7da1  
d2dlda1 d1mx3a1 d1ygya1 d1qp8a1 d1li4a1 d2naca1 d1npya1 d3t4ea2  
d1o0sa1 d2hk9a2 d2egga2 d1b26a1 d1bvua1 d1gq2a1 d1clda1 d1leha1  
d1gtma1 d1euza1 d1nvt1 d3dona2 d1edza1 d1gpja2 d1vi2a1 d1p77a1  
d1nyta1 d1b0aa1 d1vl6a1 d1v9la1 d1txga2 d3f47a1 d1mv8a2 d2pv7a2  
d1xc2a3 d2ahra2 d4xiya1 d2f1ka2 d1pgja2 d1i36a2 d1lj8a4 d1teaa3  
d1qmg2 d2i76a2 d2g5ca2 d1wdka3 d1dlja2 d3cuma3 d1kola2 d1f8fa2  
d1qora2 d1jqba2 d1vj0a2 d1cdoa2 d1gu7a2 d1d1ta2 d1xa0a2 d2dm6a2  
d1jvba2 d1rjwa2 d1llua2 d1h2ba2 d1tt7a2 d1piwa2 d1o89a2 d1liz0a2  
d1e3ja2 d1yb5a2 d1uufa2 d1vj1a2 d1e3ia2 d2aq2b1 d1ck1a1 d1enf1  
d1i4pa1 d1v1oa1 d1et9a1 d1esfa1 d2g9hd1 d4ohja1 d1klud1 d1bxta1  
d1eu3a1 d1ty0a1 d1fnua1 d3gpdg1 d1vc2a1 d2nvwa1 d1u8fo1 d1ydwa1  
d1hdgo1 d2g17a1 d1cf2o1 d2czca2 d1r0ka2 d1obfo1 d2cvoa1 d1ebfa1  
d1h6da1 d1i32a1 d1zh8a1 d2q49a1 d1qkia1 d1j5pa4 d3pzra1 d1xeaa1

d1vkoa1 d1vm6a3 d3qvsa1 d2pkqo1 d1b7go1 d1gr0a1 d1plja1 d1lc0a1  
d1j0xo1 d3pwka1 d2hjsa1 d1zyao1 d1vkna1 d1tltal d1nvmb1 d3sjua\_  
d3ojfa1 d1xu9a1 d2jjya1 d1n7ha\_ d1y1pa1 d1h5qa\_ d1jtva\_ d4fs3a\_  
d2bkaa1 d1gy8a\_ d2c5aa1 d1ulsa\_ d1ooea\_ d2b69a1 d1y5ma1 d1spxa\_  
d1ae1a\_ d1bxka\_ d1ydea1 d1gega\_ d1hdoa\_ d1o5ia\_ d1e6ua\_ d1snya1  
d2rhca\_ d3zv4a\_ d5ceja\_ d2d1ya1 d1fjha\_ d3w8ea\_ d2fmua1 d1x1ta\_  
d1rpna\_ d3ay7a1 d1k2wa\_ d1eq2a\_ d2hrba1 d3ruaa\_ d2ew8a1 d4hwka\_  
d1xgka\_ d2bd0a1 d1yo6a1 d2a35a1 d2ntva\_ d1vl8a\_ d1hdca\_ d4bkua\_  
d2ag5a1 d2q45a\_ d1nffa\_ d4iy1a\_ d1zbqa1 d1kewa\_ d1ek6a\_ d1ja9a\_  
d2q46a2 d1iy8a\_ d1cyda\_ d2ptga\_ d1hxha\_ d1uzma1 d3lyla\_ d4m89a\_  
d3wyea\_ d2b1la1 d1w6ua\_ d1sb8a\_ d2q2va\_ d4nr0a\_ d1e6wa\_ d2gasa\_  
d3oiga1 d2bgka1 d1mxha\_ d1vl0a1 d1r6da\_ d1wmaa1 d1e7wa\_ d2c07a1  
d1xkqa\_ d3tzha\_ d1g0oa\_ d3lz6a\_ d1qyca\_ d1ledoa\_ d1gz6a\_ d1oc2a\_  
d1t2aa\_ d1zema1 d2xoxa\_ d1z45a2 d1geea\_ d1p33a\_ d3lt0a\_ d4e6pa\_  
d2wyua\_ d1db3a\_ d4q9na\_ d1xh1a\_ d4o1ma\_ d1fmca\_ d2uvda\_ d2gdza1  
d1uaya\_ d2z1ma\_ d2o23a2 d2fr1a2 d2fr1a1 d1qsga\_ d1qyda\_ d4zjua\_  
d2a4ka1 d1yb1a\_ d1wvga1 d1yxma1 d3f4ba\_ d1mg5a\_ d1xg5a1 d1r55a1  
d3gboa\_ d1atla\_ d1kufa\_ d1buda\_ d4q1la\_ d1quaa\_ d1yp1a\_ d1wnia\_  
d3nqyb\_ d4gera\_ d1bqba\_ d4c5pa\_ d2bsza1 d4bgfa\_ d1w4ta1 d1ex0a4  
d1g0da4 d2f4ma1 d1x3za\_ d3u1ra1 d1g9ka2 d1k7ia2 d2w0pa\_ d2diaa1  
d2e9ia2 d2e9ja1 d2dj4a1 d2eeba1 d2diba1 d2dmba1 d2dmca1 d2d7oa1  
d2ee6a1 d2d7pa1 d2eeaa1 d2di8a1 d1wlha1 d2d7na1 d2nqca\_ d2d7ma1  
d2dica1 d3cnka\_ d2k3ta1 d2eeca1 d1qfha1 d2bp3a1 d1v05a\_ d2ee9a1  
d2eeda1 d2di9a1 d3ioqa\_ d1fh0a\_ d1o0ea\_ d1khqa\_ d1m6da\_ d2cb5a\_  
d1cs8a\_ g8pch.1 d1s4va\_ d2pnsa\_ d1vsna1 d1mira\_ d1iwda\_ d2oula\_  
d7pcka\_ d3bwka\_ d3bcna\_ d2p86a\_ d1pvja\_ d1pcia\_ d1gece\_ d1deua\_  
d4bs6a\_ d1xkga1 d1cqda\_ d1jqpa2 d2c0ya\_ d2bdza\_ d3p5ua\_ d2o36a\_  
d1k9xa\_ d1ex4a2 d1c6va\_ d2jk6a2 d2jk6a1 d1feca1 d1feca2 d1lpfa1  
d1lpfa2 d1xhca1 d1xhca2 d1dx1a2 d1dx1a1 d1gera2 d1m6ia2 d1onfa2  
d3lada2 d3lada1 d1w4xa1 d1w4xa2 d1gesa2 d1mo9a1 d1xdia1 d1fl2a2  
d1fl2a1 d1fcda1 d1fcda2 d1h6va2 d1h6va1 d1mo9a2 d1gv4a2 d1gv4a1  
d2gv8a2 d2gv8a1 d1aoga1 d1aoga2 d1hyua1 d1ebda1 d1ebda2 d3dk9a1  
d1q1ra2 d1q1ra1 d1gesa1 d1pv8a\_ d1w5qa\_ d2c1ha\_ d1ohla\_ d1zbfal  
d2z1ha\_ d2etja1 d3qioa1 d1j11a\_ d2e4la\_ d1j12a\_ d2lsna1 d1uaxa\_  
d2yv0x\_ d1mu2a1 d1lekea\_ d1i39a\_ d1pn0a1 d1reoa1 d1ju2a1 d2f5va1  
d3c96a1 d2gmha1 d1pj5a2 d1gpea1 d1o5wa1 d1n4wa1 d1k0ia1 d2dw4a2  
d2ivda1 d1seza1 d2voua1 d1kdga1 d1s5ja1 d2hbja2 d2igia\_ d1wlja\_  
d1qhta1 d4dlea1 d1tgoa1 d2f96a1 d3tr8a1 d3mxma\_ d1q8ia1 d1y97a1  
d1w0ha\_ d1kfsa1 d2py5a1 d1d5aa1 d1yt3a3 d2guia\_ d3mwpal d4kb1a\_  
d2v76a\_ d1wj1a1 d1aqca\_ d1qqga2 d1qqga1 d1ntva\_ d1n3ha\_ d4dbba\_  
d3f0wa1 d1p3ra\_ d1wgua1 d2cy4a1 d3hqca\_ d1wvha1 d1xr0b1 d1jmx2  
d1jmx1 d1pbya1 d1r7ha\_ d1faaa\_ d1wika1 d1xfla\_ d1ttza1 d2f51a1  
d1ti3a\_ d1nhoa\_ d1sena\_ d2i4aa\_ d1ep7a\_ d1zmaa1 d1fo5a\_ d3lefa1  
d3diea1 d2yana1 d1z6na1 d1oaza\_ d3zywa1 d4aj8a\_ d1nm3a1 d4fiwa\_

d1wmja\_ d4hs1a1 d1liloa\_ d1xwaa1 d1wjka1 d2vmla\_ d1gh2a\_ d1h75a\_  
d1nw2a\_ d1kx5b\_ d3a6na\_ d4m6ba2 d2nqbd\_ d3wkjd\_ d2yfwe\_ d4h9na\_  
d5bnxa\_ d1kx5c\_ d3r45a\_ d1eqzb\_ d4jjnb\_ d1f66c\_ d1eqza\_ d4wnnb\_  
d1kx5a\_ d1u35c1 d1lid3a\_ d2nqbc\_ d1kx5d\_ d3us3a3 d3us3a1 d1um8a\_  
d1ixza\_ d1qvra2 d1qvra3 d1sxjc2 d1jr3d2 d2p65a\_ d1l8qa2 d1g8pa\_  
d3hu3a3 d1sxjd2 d1njfa\_ d1in4a2 d1sxja2 d1tuea1 d2ce7a2 d1w5sa2  
d1sxjb2 d1d2na\_ d1ny5a2 d1ofha\_ d2gnoa2 d2a5yb3 d1fnna2 d1u0ja1  
d1lv7a\_ d1iqpa2 d2fnna2 d1ixsb2 d4gita\_ d1sxje2 d1g41a\_ d1pd212  
d1nhya2 d2a2ra2 d1k0dd2 d1f2ea2 d1gsua2 d1f3ba2 d2fhea2 d2pvqa1  
d1tw9a2 d1oyja2 d1e6ba2 d1k0ma2 d3ik7a1 d4is0a1 d1r5aa2 d1jlva2  
d1m0ua2 d3gtub2 d1z9ha2 d1okta2 d1axda2 d2gsra2 d1tu7a2 d1k3ya2  
d1zgma1 d1b48a2 d1gnwa2 d1gwca2 d2gsta2 d1glqa2 d1oe8a2 d1pn9a2  
d1v2aa2 d1fw1a2 d1duga2 d2m9wa1 d3dfxa\_ d4ilya\_ d1chka\_ d4olta\_  
d1qqya\_ d1gd6a\_ d1livma\_ d2gv0a\_ d1iiza\_ d2z2fa\_ d1j8xa\_ d1gh1a\_  
d1b9oa\_ d1741a\_ d1691a\_ d2o4wa\_ d1p37a\_ d1k28a3 d1xjta1 d1jtma\_  
d2f2qa\_ d4e97a1 d3w3ea\_ d4tx7a\_ d3cq1a\_ d4msta\_ d3iwra\_ d2z37a\_  
d4dyga\_ d1mpya2 d1kw3b2 d1kw3b1 d4ghga1 d1tfza1 d3isqa1 d3isqa2  
d1sqia1 d1sqia2 d1lkda2 d1lkda1 d1mpya1 d1cjxa2 d1cjxa1 d1sp9b2  
d1t47a1 d1t47a2 d1f1ua2 d1sp8a1 d1sp8a2 d2bema\_ d1pama1 d1ea9c1  
d1qhoa1 d2fhfa2 d2fhfa1 d1k3ia1 d1j0ha1 d1c1a1 d2bhua1 d1edqa1  
d1f1sa2 d1ut9a2 d1gvia1 d1txka1 d1s5ja2 d1qhta2 d4dlea2 d1tgoa2  
d3py8a2 d1q8ia2 d1kfsa2 d2py5a2 d1d5aa2 d1qsta\_ d2beia1 d4m3sa\_  
d1u6ma1 d1ygha\_ d1yk3a1 d3dr6a\_ d1xmta\_ d1z4ea1 d2ge3a1 d1bo4a\_  
d2fiaa1 d2jdca1 d1y9wa1 d3to7a\_ d1wwza1 d2f14a1 d2ozua1 d2b5ga\_  
d2cy2a1 d2p0wa\_ d1cm0a\_ d4pswa\_ d1yrea1 d1yr0a1 d1m4ia\_ d2gana1  
d1yvka1 d1ghea\_ d2g3aa1 d1y7ra1 d2euia1 d1q2ya\_ d2fsra1 d1xeba\_  
d2ae6a1 d1cjwa\_ d1qsma\_ d2aj6a1 d1y9ka1 d1i12a\_ d1vkca\_ d2atra1  
d1n71a\_ d2d4pa1 d2fiwa1 d2fe7a1 d1tiqa1 d2ou2a\_ d1yx0a1 d2fcka1  
d1p0ha\_ d2j8ma\_ d2pq8a\_ d1z4ra1 d1s3za1 d1ufha\_ d2hqya1 d2hqya2  
d1lrza2 d1ne9a1 d1lrza3 d4alac\_ d1pjwa\_ d1rera1 d1s6na\_ d3uzqb\_  
d4od7a1 d1z6ma1 d4mcua1 d4dvca1 d1r4wa\_ d3l9sa\_ d1un2a\_ d3rppa\_  
d3kasa1 d3b1a3 d1etha2 d1w52x1 d2ppla1 d1lpbb2 d2oxea1 d1bu8a2  
d1rpla2 d1ys1x\_ d4hs9a\_ d1lspa\_ d1ex9a\_ d1ku0a\_ d3qmma\_ d1bnla\_  
d1dy2a\_ d2h1ia1 d2r8ba1 d3b5ea1 d3cn9a\_ d1auoa\_ d1lgya\_ d4l3wa\_  
d1llfa\_ d1lukca\_ d1c4xa\_ d1j1ia\_ d2rhwa\_ d3groa\_ d1pjaa\_ d1thta\_  
d2ftba\_ d1pmpa\_ d2rcqa1 d1fdqa\_ d4lkpa\_ d1sa8a\_ d1vyfa\_ d1lpja\_  
d3vg7a1 d4azqa1 d1o8va\_ d5bvqa\_ d1p6pa\_ d2qo4a\_ d1opba\_ d1yiva1  
d1o1va\_ d4bvma1 d4tkba\_ d4i3ba\_ d1bwya\_ d1ftpa\_ d4gkca\_ d1cbia\_  
d3p6da1 d1kqwa\_ d2a0aa1 d3zxha\_ d1cgla\_ d1rm8a\_ d1leaka2 d1hy7a\_  
d2jsda\_ d1cxva\_ d1hv5a\_ d1i76a\_ d3p0ya1 d1igra1 d1igra2 d1n8yc2  
d1n8yc1 d1m6ba2 d1m6ba1 d1dzka\_ d4tlja\_ d2a2ua\_ d4wfvva\_ d3t1da\_  
d4iixa\_ d3zq3a\_ d2nnda\_ d1i4ua\_ d1kxoa\_ d1bbpa\_ d1kt7a\_ d1exsa\_  
d3s26a1 d1lf7a\_ d1qfta\_ d4gh7a\_ d1z24a1 d1qabe\_ d1xkia\_ d1lew3a\_  
d3bx7a\_ d4iawa1 d1n0sa\_ d1gkab\_ d3kzaa\_ d2k23a\_ d2l9ca1 d2joza1



d1gm6a\_ d3kffa\_ d3saoa1 d1e5pa\_ d1yupa1 d1iiua\_ d2tbvc\_ d1c8nc\_  
d1x36a\_ d1smvc\_ d1ng0c\_ d4sbvc\_ d1lopoa\_ d1cixa\_ d1y29a\_ d1v7fa\_  
d2jtba\_ d1d1ha\_ d1g9pa\_ d1lupa\_ d1qk7a\_ d1mb6a\_ d2a2va\_ d1niya\_  
d1i25a\_ d1hvwa\_ d2mpqa\_ d1ie6a\_ d1kqha\_ d1la4a\_ d2mxoa1 d1koza\_  
d1qk6a\_ d1emxa\_ d1lqra\_ d1c6wa\_ d1rmka\_ d1ixta\_ d1eyoa\_ d1cna\_  
d1fu3a\_ d1g1pa\_ d1f3ka\_ d1fyga\_ d1rypd\_ d1irua\_ d1rypc\_ d3unfk\_  
d1rypa\_ d1j2pa\_ d1irui\_ d1j2qh\_ d3unfh\_ d1m4ya\_ d1rypb\_ d1irul\_  
d1irug\_ d1iru2\_ d1q5rh\_ d1rypg\_ d1g3ka\_ d1iruf\_ d1q5qa\_ d1e94a\_  
d1irub\_ d1ryph\_ d3ty6a\_ d1iruj\_ d1iruk\_ d1rype\_ d1irud\_ d1irue\_  
d3mi01\_ d1rypf\_ d1iruh\_ d2z3ba\_ d1iruc\_ d3mka2\_ d1irul\_ g1gk9.1  
g1cp9.1 g1e3a.1 d1jgta2 d1ofda3 d1ea0a3 d1ecfa2 d1q15a2 d1ct9a2  
d1ao0a2 d1te5a\_ d3ubub\_ d1egia\_ d1qo3c\_ d1v7pa\_ d1tdqb\_ d3ubua\_  
d1c3ab\_ d1h8ua\_ d3bx4b\_ d1t8ca1 d1sb2a1 d1qdda\_ d2ziba1 d3cada\_  
d1j34b\_ d1jwia\_ d1jzna\_ d1c3aa\_ d1oz7b\_ d1wmza\_ d3bdwb\_ d1hq8a\_  
d1fifa1 d1dv8a\_ d3hupa\_ d1wk1a1 d1umra\_ d2afpa\_ d3bx4a\_ d1gz2a\_  
d1sl6a\_ d1v7pb\_ d3g8ka\_ d1ixxa\_ d1j34a\_ d1jwib\_ d1g1sa1 d1y17a1  
d1ja3a\_ d1fvub\_ d3bdwa\_ d1sb2b1 d1fvua\_ d1umrc\_ d1oz7a\_ d4m17a\_  
d3cfwa1 d1ypqa1 d1g1ta1 d3fd4a\_ d3l9jc\_ d4dn8a1 d1v41b\_ d1rd1l\_  
d2msba\_ d4w9ta\_ d1jvna1 d4x2ra1 d1ka9f\_ d1qo2a\_ d4axka1 d1h5ya\_  
d4u28a\_ d2y88a\_ d4wd0a\_ d1vzwa1 d3ia2a\_ d1a88a\_ d4dgqa1 d1hkha\_  
d1zoia\_ d2flia1 d1rpxa\_ d1tqja\_ d1tqxa\_ d3syxa1 d1mkea1 d2p8va\_  
d1xoda1 d1i7aa\_ d1qc6a\_ d1egxa\_ d4lt9a1 d3tc7a1 d3hoja\_ d3vnda\_  
d3n18a1 d1geqa\_ d3naval d1v5xa\_ d4a2ra1 d3tc6a1 d1ujpa\_ d4ijba\_  
d1xcfa\_ d1vc4a\_ d1rd5a\_ d1qopa\_ d3b5va\_ d2r80b\_ d1cqxa1 d1cg5a\_  
d1gcvb\_ d3boma\_ d2h8fb\_ d2raoa\_ d3bj1a\_ d4hrrb\_ d2r50a\_ d3d1kb\_  
d2aalb1 d3zhwa\_ d3hf4b\_ d3gdja\_ d1jebb\_ d3bj1b\_ d1x9fb\_ d1wmub\_  
d1gcva\_ d3bcqb\_ d3d4xb\_ d1gvha1 d2dc3a\_ d3hf4a\_ d4yu3a\_ d3k8ba\_  
d1qpwb\_ d2r80a\_ d3bcqa\_ d1v4wa\_ d3wtgb\_ d1j17a\_ d4esaa\_ d3d1ab\_  
d1fsla\_ d4h21a\_ d1v4wb\_ d1mwca\_ d1vhba\_ d1jeba\_ d1spgb\_ d1h97a\_  
d1q1fa\_ d1tu9a1 d3d1aa\_ d1hdsb\_ d3hyub\_ d2zfb\_ d3fs4a\_ d1oj6a\_  
d1shrb\_ d4h21b\_ d4yu3b\_ d1spga\_ d3hrwa\_ d3qqra\_ d3at5a\_ d4wchd\_  
d3hyua\_ d1cg5b\_ d1uc3a\_ d1hbra\_ d2raob\_ d1outb\_ d4esab\_ d3gdjb\_  
d3qqqa\_ d1x9fc\_ d3vrfa\_ d1litha\_ d3mkba\_ d3d4xa\_ d3mjpa\_ d1jl6a\_  
d3fh9a\_ d1outa\_ d2dc3b\_ d1lit2a\_ d3eoka\_ d3g46a\_ d1qpwa\_ d3vrfb\_  
d1ch4a\_ d1x9fd\_ d1hdsa\_ d2zfba\_ d3mkbb\_ d1or4a\_ d3wtga\_ d1a4fa\_  
d3fh9b\_ d3bomb\_ d3cy5a\_ d3at5b\_ d1x9fa\_ d2oifa\_ d4lmb\_ d1cpcb\_  
d3v57a\_ d1kn1a\_ d1cpc\_ d4f0ta\_ d2vjha\_ d4po5b\_ d1eyxa\_ d1alla\_  
d4f0tb\_ d1b33b\_ d1b8db\_ d4h0mb\_ d1b33a\_ d2vjhb\_ d4lmb\_ d2vmlb\_  
d1allb\_ d2vjta\_ d3dbja\_ d2vmla\_ d2vjtb\_ d4f0ub\_ d1f99b\_ d4rmpa1  
d1liaa\_ d1eyxb\_ d2uulb\_ d4lmsb\_ d4f0ua\_ d2bv8a\_ d1f99a\_ d2bv8b\_  
d2c71b\_ d3dbjb\_ d4rmpb1 d1b8da\_ d4h0ma\_ d3v57b\_ d1liab\_ d2uula\_  
d2j96a\_ d1pjqa1 d1cwva5 d4ekfa\_ d2ckga\_ d1th0a\_ d2bkra\_ d1mtza\_  
d1hlga\_ d2xqfa\_ d1ea5a\_ d1f6wa\_ d1dx4a\_ d1qe3a\_ d1k4ya\_ d4qwwa\_  
d2ha2a\_ d3c8da2 d2pbla1 d1jkma\_ d1jjia\_ d1jjfa\_ d1gkub1 d1gkub2

d2qvba\_ d2v9za\_ d4kafa1 d2m5ta\_ d1cqqa\_ d1wqsa\_ d5bpea\_ d2ipha\_  
d1lvoa\_ d2bhga1 d3tnta\_ d3sjia\_ d3d23a1 d2fyqa\_ d3tloa\_ d3zvea1  
d2hrva\_ d3q3ya1 d4asha1 d1b9ra\_ d1offa\_ d1frfa\_ d3wcqa\_ d1e9ma\_  
d1l5pa\_ d1wria\_ d1i7ha\_ d3av8a\_ d1czpa\_ d1rfka\_ d3p1ma1 d3b2ga\_  
d2bt6a2 d4iuua3 d4bvva\_ d5hpga\_ d3k65a\_ d1ki0a3 d1ki0a2 d1ki0a1  
d1a0ha1 d1pmla\_ d3sp8a3 d2feba1 d1mdwa\_ d1qxp4 d1ziva1 d1zcm1  
d1f74a\_ d3l21a\_ d2e1da\_ d1to3a1 d1w3ia\_ d1sfla\_ d1n7ka\_ d1vcva1  
d4imea\_ d1wa3a\_ d2ocza1 d1f2ja\_ d3m16a\_ d2yxga\_ d1ub3a\_ d3a5fa\_  
d1fbaa\_ d1l6wa\_ d1xfba1 d1wx0a1 d1vpxa1 d1mxsa\_ d2a4aa1 d1xkya1  
d3cq0a1 d3s1xa\_ d1f05a\_ d1fdja\_ d3cp1a1 d4d2ja\_ d1e88a1 d1l6ja5  
d1l6ja4 d1eaka4 d1eaka3 d1l6ja3 d1h8pa2 d3rp2a\_ glucy.1 d1fuja\_  
d2zchp\_ d3w94a\_ d1si5h\_ d1lo6a\_ g2pka.1 d1cgha\_ d1kigh\_ d1a5ia\_  
d3s9ba\_ d1hj8a\_ d1ao5a\_ d2anya\_ d1q3xa1 d1gvza\_ d1azza\_ d4gsoa\_  
d2f91a1 d1iaua\_ d1gdna\_ d1eufa\_ g1fiw.1 d1eq9a\_ d4nfea\_ d2rdla\_  
d1spja\_ d1elva1 d1a7sa\_ d1ekbb\_ d1pfxc\_ d1yc0a\_ d2aiqa\_ g1fiz.1  
d1fi8a\_ d4k60a\_ d4dgja\_ d1mzaa\_ d1op0a\_ d3tjva\_ d1pytd\_ d1sgfg\_  
g1gg6.1 d2eeka\_ g1rtf.1 d1a0ja\_ d3g01a\_ d1pytc\_ d4e7na\_ d1ddja\_  
d1z8ga1 d2hlca\_ d1npma\_ d1brup\_ g1jou.1 d1sgfa\_ d1autc\_ g2hnt.1  
g1kdq.1 d1orfa\_ d3s69a\_ d4crga\_ d1fxya\_ d1bqya\_ d1svpa\_ d1mbma\_  
d3su6a1 d1cula1 d4agka\_ d1vcpa\_ d1q31a\_ g1n11.1 d3e90b\_ d1ep5a\_  
d3uljb\_ d1m41a\_ d2bk7a\_ d3fjua\_ d1z5ra1 d1kwma1 d1jqga1 d2c1ca1  
d1dtda\_ d1h81a2 d4lu0a\_ d1of8a\_ d3unda1 d3e9aa1 d1vr6a2 d2qkfa\_  
d1d9ea\_ d1o60a\_ d1e69a\_ d1mv5a\_ d3g60a4 g1ii8.1 d1ewqa2 d1ji0a\_  
d1qhla\_ d1v43a3 d2wmfa1 d1vpla\_ d4a82a2 g1f2t.1 d2d62a1 d3tuic1  
d2bbsa1 d3g60a3 d2ixea\_ d1g6ha\_ d1sgwa1 d2qi9c\_ d3rlfa1 d3b60a1  
d3d31a2 d2pzea1 g1xew.1 d1jj7a\_ d1oxxk2 d2onka1 d1wlwa\_ d1iwea\_  
d1vmaa2 d1nija1 d1np6a\_ d2p67a1 d3ihla\_ d1okkd2 d1lsl1a2 d1slma2  
d1liona\_ d2v40a\_ d1dj3a\_ d3hida\_ d2v01a1 d2g0ta1 d1vcoa2 d1j8mf2  
d1g3qa\_ d1xjca\_ d1p9ba\_ d1qzxa3 d1ihua2 d1ihua1 d2qm8a\_ d1dj2a\_  
d4ioja\_ d1cp2a\_ d1yrba2 d1hyqa\_ d3gqba2 d1skye3 d1xp8a1 d1tf7a2  
d1tf7a1 d1ye8a1 d1skyb3 d2qe7d2 d4blta\_ d4huta\_ d3l1daa2 d4hyya\_  
d2i3ba1 d1crla\_ d3j9tb2 d3ntua2 d1vdza1 d2z43a\_ d1e9ra\_ d3ziaa2  
d1n0wa\_ d1g6oa\_ d3ziad2 d3j9ta2 d1pzna2 d3gqbb2 d2i49a\_ d1nnfa\_  
d1xvxa\_ d1ursa\_ d1h3da1 d1iuda\_ d4m1va1 d1twya\_ d3e13x\_ d2nxoa1  
d4pfua\_ d3ttma\_ d1elja\_ d2qmwa1 d1us5a\_ d1y3na1 d1jeta\_ d1uqwa\_  
d4f19a1 d2esna2 d3thia\_ d3fasa1 d2uyeb\_ d2xwva1 d1r9la\_ d2fyia1  
d1pb7a\_ d2ozza1 d1sw5a\_ d1nh8a1 d1vr5a1 d2g29a\_ d1xs5a\_ d3lswa\_  
d2z23a\_ d3w9va\_ d3tcha\_ d1q35a\_ d1z7me1 d3q27a\_ d1p99a\_ d1ve4a1  
d2i6ea1 d4mcoa1 d4n8ya\_ d1eu8a\_ d1zbma1 d1hsla\_ d1ixca2 d1jl1na\_  
d1xvya\_ d1y9ua\_ d2z22a1 d1xoca1 d4oera\_ d1wdna\_ d5f1qa1 d1xt8a1  
d4gwoa\_ d4igta1 d1pc3a\_ d4mmpa1 d1o63a\_ d2czla1 d2onsa2 d4mija1  
d4ok5a1 d2bmfa1 d2bmfa2 d1yksa1 d1yksa2 d2qeqa1 d2jlqa1 d1alva2  
d1eh3a\_ d3skpa\_ d1dtza1 d1dtza2 d1lieja\_ d1jnfa2 d1ce2a1 d1jnfa1  
d1b1xa2 d1b1xa1 d1jw1a1 d1jw1a2 d1ryoa\_ d1h76a1 d1h76a2 d1c4oa1

d2p6ra3 d2p6ra4 dloywa2 dloywa3 dlwrba1 dlw36b2 dlw36b1 d1c4oa2  
d3bora\_ d1t6na\_ d2eyqa5 d2eyqa3 d2eyqa2 d2zu6a2 dlveca\_ dluaaa1  
dlw36d1 d2g9na1 dlz3ix2 d2rb4a\_ dlhv8a1 dlhv8a2 d1t5ia\_ dlw36c2  
d2j0sa2 d2j0sa1 dlfuka\_ d3hjha1 dlz5za1 dlqdea\_ dlz63a1 d1s2ma2  
d1s2ma1 dlwp9a1 dlwp9a2 dlgm5a3 dlgm5a4 d3dina4 d3dina3 dlq0ua\_  
dlw36c1 dlz3ix1 d1nkta3 d1nkta4 dluaaa2 dlw36d2 glqhh.1 d2fwra2  
d2fwra1 d3q3ma\_ dlza0a1 d1mxra\_ d2inca\_ d2incb\_ dlmhyb\_ d3hf1b\_  
dlmtyb\_ d1r2fa\_ d2uw1a\_ d1mhyd\_ d3n37a\_ d1afra\_ d1oquc\_ d1syya\_  
dlmtyd\_ d2olza\_ dluzra\_ d1smsa\_ d2fkza\_ dlzujal d1s3qa1 d2fjca1  
dlz6om1 dlveia\_ d4dyya\_ dljiga\_ d3gvya\_ d2pyba\_ d4cy9a1 d3bvfa1  
d1r03a\_ d2cf7a\_ d1nf4a\_ dlzs3a1 d4iwka\_ d3ka8a\_ d3np0x\_ d1n1qa\_  
d11b3a\_ d4e6ka\_ dlz6oa1 d2fzfa1 d4dyua\_ d3ge4a\_ dljgca\_ d4am4a\_  
d2z6ma\_ dlji5a\_ d1vlga\_ d11koa1 d1krqa\_ d3qz3a\_ d1o9ra\_ d2ffxj\_  
d1yv1a1 d2v2pa\_ dlj30a\_ d4di0a\_ d1dpsa\_ d1oewa\_ d2qzxa\_ d2asia\_  
d1psoe\_ d1miqa\_ d1smra\_ d2h6ta\_ d1pfza\_ dlizda\_ d3hd8a\_ dlj71a\_  
d1dpja\_ d4aa9a\_ d1t6ex\_ g1b5f.1 g1lya.1 glhtr.1 dlqdma2 dlboxa\_  
dlwkra\_ d1tzsa\_ d1libqa\_ d2qzwa\_ d1bdqa\_ d3ggta\_ d3ixoa\_ d1mrxa\_  
d2haha\_ d1tw7a\_ d4njja\_ d1sgua\_ d2p3da\_ d1nsoa\_ d3d3ta\_ d2rkfa\_  
d1c6ya\_ d2rspa\_ d3ogpa\_ d3ekwa\_ d2o4na\_ d2j9ja\_ dlbaia\_ d3ggua\_  
d3lzua\_ d4npua\_ d4j55a\_ d2r8na\_ d2fxda\_ d2p3ca\_ d4dqa\_ d3ttpa\_  
d3t3ca\_ d2p3aa\_ d2hc0a\_ d2fdda\_ d3mwsa\_ d1sr9a2 d1rqba2 dlk8rb\_  
dlwgra1 d1ef5a\_ dlwfyal d1e8ya3 dlwgya1 d1lfda\_ d2cs4a1 dlwxma1  
d2byeal d3kh0a1 d2byfal dlwxaa1 dlh4ra3 d4yl8a1 d2al6a3 dlwgda1  
dlwggal d4q5eb\_ dlwjnal d1se9a\_ d3n3kb\_ dlwz0a1 dlwe6a1 d2m0xa\_  
d2gbka\_ d3rt3b1 dlwh3a1 d1sifa\_ d2ekek2 d4ii2b1 d4hk2a1 d1c3ta\_  
d1m94a\_ dlwghal d1ttnal dlj8ca\_ dlwx8a1 d3v6cb1 d2ma9b\_ d4i61b1  
d1bt0a\_ d2jvca1 d1iyfa\_ d2k1fa\_ dlwxva1 dlwf9a1 d1t0ya\_ d2io0b2  
d1x1ma1 d2gbma\_ dlzw7a1 d2m17a\_ dlud7a\_ dlwe7a1 d2lwpal d2gbja\_  
dlwjua1 dlv6ea1 dlv86a1 d4eewa\_ dlwial d4icva\_ d4gu2a\_ dlwx7a1  
dlwy8a1 d4hjka1 d2faza1 dlw5oa1 d1yvca1 d1yeza1 d2bcgg1 d2bcgg2  
d1d5ta1 d1dszb\_ d1a6ya\_ d3cbba\_ d1ynwal d1r4ia\_ dlhcqa\_ d2hana\_  
d2hanb\_ d2enval d1kb4b\_ d2n11b\_ d1lola\_ d1cita\_ dladaqal d1fnga1  
d1uvqbl d1zs8a1 d2vola1 d2vola2 d1mfb12 d2jelh2 d1uwel2 d3qq4b1  
d1kjob\_ d1k5na1 d1osph2 d4odhl2 d1ow0a1 d1ow0a2 d1bfob2 d3l9ra2  
d3jtth1 d2fath2 d4elkb2 d1fn4b2 d2xfxb\_ d1pg7x2 d1cqka\_ d4k71b2  
d11k2a1 d1eapb2 d4lfhg2 d1i4fa1 d2nw2a2 d1kfah2 d1mhca1 d1h3ua1  
d1wejh2 d1h0db2 d1a5fh2 d1kcvh2 d1mjuh2 d1qqda1 d1kcrh2 d1k8ia1  
d3huja2 d2nnab1 d1nfd2 d3mffb2 d1s9va1 d11k3h2 d1q0xl2 d1fv1b1  
d1neza1 d4rfeb2 d1r3ha1 d1a6tb2 d1kjva1 d1pz5b2 d1onqa1 d2bc4a2  
d1de4a1 d1k8da1 d1tcra2 d1dn0b2 d1nfd2 d2xwtb2 d1bfoa2 d1mexh2  
d1iakb1 d1ypzf2 d4f7ea2 d1q7212 d2fbjh2 d1fe8h2 d1clzh2 d1fngb1  
d1uvqa1 d1vgka1 d1c16a1 d4j12a2 d4x99b2 d1igtb3 d1je6a1 d1q72h2  
d1nldh2 d1teth2 d2hmic2 d1i1ca2 d1i1ca1 d1k8ib1 d1q0yh2 d1kfa12  
d3frua1 d1pg7w2 d1u58a1 d1igyb4 d1igyb3 d1hyrc1 d1klub1 d1deeb2

d1c12b2 d2bc4b2 d2ig2h2 d1kcv12 d3wn5b1 d11k2b\_ d11k312 d1mjul2  
d1sm3h2 d1q0xh2 d1zvsal d1ydpal d1u8ib2 d1ypze2 d1kcuh2 d21j7a\_  
d1n4na\_ d2m8bb1 d2kyqa\_ d3psma\_ d1jkza\_ d1jxca\_ d2g11a\_ d1ugla\_  
d4uj0a\_ d2k4ua\_ d1hp2a\_ d2lu9a\_ d1baha\_ d2meoa1 d1wm7a\_ d1h1ya\_  
d1n8ma\_ d1jlza\_ d1wpda\_ d1c55a\_ d1pvza\_ d1wt7a\_ d1rjia\_ d1wz5a\_  
d1m2sa\_ d1pjva\_ d1c49a\_ d2ktca1 d1wmta\_ d1du9a\_ d1j5ja\_ d1rlga\_  
d1t0za\_ d2i61a\_ d1t1ta\_ d1sn4a\_ d1kv0a\_ d21kba\_ d1npia\_ d1wwna\_  
d1pe4a\_ d2kbka\_ d2li7a\_ d1djta\_ d2kbha\_ d1dq7a\_ d1sega\_ d1omya\_  
d1zywa1 d1jzaa\_ d1n9wa1 d1bbua1 d1e1oa1 d1c0aa1 d1l0wa1 d3a74a1  
d1eova1 d1t61c1 d1iyjb4 d1iyjb5 d1iyjb3 d1o7ia\_ d4ipca1 d1x3ea\_  
d4apva\_ d1jb7a1 d1jb7a2 d1jb7a3 d3kdfa\_ d1ue1b\_ d1wjja1 d3eiva\_  
d1xjva2 d1xjva1 d2ccza2 d1se8a\_ d1l1oc\_ d1qvca\_ d3ulla\_ d1qzga\_  
d1miau4 d1miau5 d1miau3 d1y14b1 d2nn6i1 d1i94l\_ d2zjra2 d1smxa\_  
d2qamc2 d1hh2p1 d2r7da1 d1rl2a2 d1wfga1 d3bzka4 d1x6oa2 d3a0ja\_  
d2j01d2 d2ja9a1 d4q15a\_ d1hr0w\_ d1luza\_ d2n3sa\_ d2vnud1 d1h95a\_  
d1go3e1 d2nn6h1 d1ne3a\_ d2mo1a\_ d1iz6a2 d1jjga\_ d1e3pa2 d2ix0a3  
d2ix0a2 d21xja\_ d1ueba3 d1ueba2 d2z0sa1 d1u01a1 d2ix0a1 d2eifa2  
d2je6i1 d3i2za1 d2c35b1 d2ahob2 d1t9ha1 d3i4oa\_ d2qall1 d1jt8a\_  
d2nn6g1 d1g6pa\_ d3cama\_ d1i94q\_ d1c9oa\_ d1d7qa\_ d2ba0a1 d2vnud2  
d2vnud3 d1khia2 d2qalq1 d1wi5a1 d1xtda2 d1ny4a\_ d1dgsa2 d1fvial  
d1p16a1 d1x9na2 d2a1ka\_ d1je5a\_ d1rpma\_ d2shpa1 d1yfoa\_ d1l8ka\_  
d2ooqa1 d1g4us2 d1p15a\_ d1lara2 d1lara1 d1wcha\_ d2fh7a2 d2fh7a1  
d1tdha3 d1q3ba3 d1ee8a3 d1k82a3 d3ubra\_ d1qo8a1 d1d4ca1 d2k3va\_  
d1ft5a\_ d1qdba\_ d1m1qa\_ d2j7aa\_ d1h21a\_ d1ogyb\_ d4fasa\_ d1jnia\_  
d1oaha\_ d1sp3a\_ d3h33a\_ d1rwja\_ d19hca\_ d3bxua\_ d3h4na\_ d1i77a\_  
d3caoa\_ d1j0pa\_ d2ctha\_ d1duwa\_ d1ofwa\_ d2e84a\_ d1hh5a\_ d1gyoa\_  
d3h34a\_ d1wioa4 d1ccza2 d1vcaa1 d1dr9a2 d1ic1a1 d2d9qb1 d2nxyb2  
d2dara2 d2dara1 d1wyha2 d2dloa2 d1rutx4 d1rutx3 d2cuqa2 d1x41a2  
d1x41a1 d1x3ha2 d1x3ha1 d2d8za1 d1x61a2 d1x6aa1 d1x6aa2 d2cora2  
d2cora1 d1v6ga1 d1v6ga2 d2d8za2 d1x64a1 d1x64a2 d1b8ta1 d2co8a1  
d1x63a2 d2dj7a2 d2dj7a1 d2cu8a2 d2cu8a1 d1g47a1 d1j2oa1 d1wyha1  
d2dloa1 d1wiga1 d1wiga2 d2cupa2 d2cupa3 d1x68a1 d2d8ya2 d2d8ya1  
d1m3va2 d1x62a1 d1x68a2 d1x61a1 d1b8ta3 d1b8ta2 d2d8xa2 d2d8xa1  
d1x4ka1 d1x4ka2 d2cuqa1 d1m3va1 d2co8a2 d1j2oa2 d1x63a1 d2cura1  
d2cura2 d1x62a2 d1op9a\_ d1y01a1 d1letzb1 d1egj11 d2gsib1 d1nj9a1  
d4jfhdl d1aqk11 d1t2ja\_ d1lo4h1 d1zvya1 d3v4v11 d4enec1 d1kxtb\_  
d5e8ea1 d2pxya\_ d4weud\_ d1xiwc\_ d2esvd1 d1qnzh\_ d1ogae1 d1f4xh1  
d4n1hb\_ d3ezjb1 d3mlw11 d1kfah1 d1letza1 d1b4jh1 d3cfic\_ d4w68a\_  
d2arja1 d1ek3a\_ d2ok011 d1vera\_ d1uwgh1 d1blnb1 d1fpth1 d1rzga1  
d2giya1 d4m3kb1 d1nc2a1 d2nyyd1 d1ncna\_ d1fbih1 d5dxwa\_ d4fqqa1  
d1dqdh1 d1jfq11 d1kelh1 d1faih1 d1frgl1 d1figl1 d4m6n11 d1fo0a\_  
d4hxb11 d3b5ga\_ d3quyd1 d2h9gb1 d1i8kb\_ d2dd8h1 d2ck0h1 d1eaja\_  
d4w6wb1 d2a6ib3 d1t66d1 d2e27h\_ d1ob1b1 d1f11b1 d2v7na1 d1ad0a1  
d2xt1b1 d1pskh1 d4i13b1 d2op411 d1a0q11 d1uwel1 d1za3a1 d1ncb11

d4uu9a\_ d1bm3h1 d1cloh1 d1nqba2 d1cf8h1 d4y5va\_ d1mhph1 d5anma1  
d4cdgc1 d4ldeb\_ d1y0lb1 d2pcpb1 d1z3gl1 d1dfb11 d1fh5h1 d3g5xa1  
d1tzib1 d4dn3l1 d3zhka1 d2b1hh1 d2uyla1 d1f3dh1 d1nj9b1 d2agjh1  
d2h1pl1 d1q72h1 d8fabb1 d1ndmb1 d1rjca1 d4u6hb1 d3upca\_ d2fbj11  
d1osph1 d1tvda\_ d2cjvh\_ d4fhbd1 d1bd2d1 d1rz7h1 d3nn8a\_ d1blna1  
d1knoa1 d1nfda1 d2bmkb1 d1dq11\_ d1igyb1 d1igf11 d12e8h1 d3utza1  
d1nc2b1 d1rihh1 d4mwfb1 d4jvpa1 d1mieh1 d1rhfa1 d1fgn11 d1sbsh1  
d1lp9e1 d1dn0a1 d4lqf11 d1iaih1 d1kgcd1 d1mh5b1 d1gpol1 d2g60h3  
d1f8t11 d2jixd1 d4grwh\_ d1fo0b\_ d1bfob1 d1axsa1 d1u9ka\_ d1nmbh\_  
d1h8na1 d1h8na2 d1jguh1 d4eura1 d3sdy11 d35c8h1 d1w72l1 d1mvub\_  
d1i9rh1 d1ob1a1 d4wenb\_ d1yeeh1 d3ietc1 d1f58h1 d1ad0b1 d1mqkl\_  
d1nbvh1 d4b50a\_ d3r8bb\_ d1baf11 d1mamh1 d4rgne1 d2gsgb\_ d35c8l1  
d1bafh1 d1ai1h1 d2pcpa1 d2fath1 d2x1pa\_ d1orsb1 d1libgl1 d1shma\_  
d1a2yb\_ d1u0qa\_ d2coqa\_ d1hilb1 d1qfwi\_ d1jv5b\_ d1fn4b1 d5e0qa\_  
d1nsnh1 d1plgl1 d4ocxl1 d1kb5h1 d1rzhf1 d1pg7x1 d2fx7h1 d2oi9c\_  
d1l7il1 d3eyva1 d1d5il1 d4ffyl\_ d1tet11 d1a6wh\_ d1ac6a\_ d3dvfa\_  
d1nfdel d1mimh1 d1ri8a1 d1jhlh\_ d3dura\_ d1fskb1 d1f97a1 d3so3b1  
d2ak4d1 d1lp9f1 d4z7wf1 d1l7th1 d4y5ya\_ d4x7ec1 d1emth1 d1ikfl1  
d1nlbh1 d4utal1 d1bjma1 d1eapb1 d1u6ah1 d2dtgd1 d1kj2b\_ d1xeda1  
d1cleh1 d1fgvh\_ d2bnub1 d2fb4h1 d2dtgb1 d1ktrh\_ d1jpth1 d1qkz11  
d4hepg\_ d2atpb1 d1flrh1 d2hrpl1 d1mvfa\_ d1iaim1 d3k80a1 d2jb5h1  
d3zkxc\_ d4grwe\_ d1it9h1 d1rhhb1 d3w9ec\_ d1e4wh1 d1sy6h1 d2j6eh1  
d3qxta\_ d1jglh1 d1p7ka1 d1tzhb1 d4n8pa1 d1gaf11 d2jelh1 d1wioa2  
d4i0cc1 d1cicb1 d1lmka2 d1lmka1 d1iqwh1 d1orqb1 d1ejoh1 d1jnlh1  
d4zgl1a\_ d43c9b\_ d1ggb11 d1wejh1 d3q6fa1 d1f3dj1 d3c6la1 d1bqlh1  
d3p9wb\_ d1a3r11 d1h0db1 d2uzil\_ d1eo8l1 d1qfwl\_ d1n7ml1 d1igja1  
d1c5ch1 d2a9mh\_ d1rmfh1 d1fj1b1 d4heme\_ d1ccza1 d1a5fh1 d1ogad1  
d1dlfh\_ d1qa9b\_ d1vge11 d3qskb\_ d1sjxa\_ d4ozfg1 d1sq2n\_ d1qd0a\_  
d1kcvh1 d1c5db1 d3qcull1 d3bn9d1 d1mjuh1 d4y8dc\_ d7fabh1 d3dvgb1  
d1l00l1 d1a6tb1 d1gigh1 d1kcrh1 d2hwhz11 d1yjdc1 d3clfl1 d4krna\_  
d1dl7l\_ d1e6ol1 d1mexh1 d3r0ma\_ d4kkna\_ d1fnsl1 d1loaqh\_ d1rzial  
d1ucbh1 d1ncw11 d4b41a\_ d1nfdfl1 d2mpah1 d2d7t11 d4grwf\_ d4b5ea\_  
d1l1k3h1 d3u79a\_ d4u3xa\_ d1ghfl1 d1bvkb\_ d1mcww1 d1b88a\_ d1jrhh1  
d32c2b1 d4wemb\_ d1dsfh\_ d1op3h1 d1cell1 d1iqda1 d1qoka1 d1qoka2  
d1qfuh1 d2crya1 d1ay1h1 d1loaql\_ d3ab0b\_ d1rurl1 d1t4kb1 d1bz7b1  
d1n0xh1 d1for11 d1lucb11 d4w6yb\_ d43c9a\_ d2aab11 d1tzial d4n1ca\_  
d1k6qh1 d3g9ab\_ d4tvsa1 d1igmh\_ d1pz5b1 d3dx9a1 d3wxwh\_ d1nakh1  
d1kcul1 d3eaka\_ d4qlra1 d1cr9l1 d1d9ka\_ d1f4xl1 d1deea1 d2i27n2  
d1c12a1 d2orb11 d1j8hd1 d1mcph1 d1c5da1 d1kenh1 d1bd2e1 d1h5ba\_  
d4x7fc1 d3upaa\_ d1t3fa1 d1indh1 d2dtgc1 d4hc111 d1zv5a1 d4wgvb\_  
d1uwgl1 d4f37k1 d1aqkh1 d1vesa\_ d3zkqd\_ d1fpt11 d1l04l1 d1knob1  
d3rrqa\_ d1ct8b1 d4orz\_ d1mlbb1 d4hgkc1 d1dqd11 d1bogb1 d4ozhe1  
d1dr9a1 d1i7za1 d1dn0b1 d1kell1 d1rzib1 d1ypzf1 d1wtla\_ d1hkfa\_  
d1fail1 d1figh1 d2vyre\_ d1sjva\_ d1ohqa\_ d1bfoa1 d1pkqb1 d1mjul1

d1b4j11 d1nsn11 d2arjb1 d1p4bh\_ d4aj0a\_ d3nn8b\_ d2rcja1 d1f2xk\_  
d4v1dd\_ d1adqh1 d2eksa\_ d4k3ga\_ d1jfqh1 d1uweh1 d1frgh1 d4gftb\_  
d1uz8b1 d4n1ea\_ d1bm3l1 d1c1o11 d3mcka1 d2vq1a1 d1ae6h1 d4aq1b1  
d1uj3b1 d1nbqa1 d1fh5l1 d2ck0l1 d2ywza\_ d1q72l1 d4nbxb\_ d1hila1  
d4hz1b1 d2j88l1 d1zmya1 d1cd0a\_ d1a4ka1 d1psk11 d1a0qh1 d4krmb\_  
d1ncbh1 d2fbjh1 d1j8he1 d1i3ua\_ d1cf8l1 d1fe8h1 d2plya1 d1eeqa\_  
d2x89a\_ d1o10a\_ d2r0lh1 d1ub5a1 d1dfbh1 d3eyvb1 d4jdvb1 d4p2cg\_  
d2gsia1 d2agj11 d1u3ha1 d2h1ph1 d1rih11 d1fskc1 d1boga1 d2a77l1  
d1osp11 d1qfoa\_ d3dwta\_ d2fx7l1 d1rz7l1 d3stba1 d1pkqa1 d1b6da1  
d1dzba2 d1dzba1 d1kj2a\_ d4l1ha\_ d1rzgb1 d1dq1h\_ d12e8l1 d1mie11  
d1jmaa\_ d1sbs11 d1fgnh1 d1f58l1 d1mqkh\_ d1ndgb1 d3qeg11 d1ia111  
d2aw2a1 d1tqbc1 d3fo2a1 d4dkaa\_ d1f8th1 d2g60l1 d2ywy\_ d1uj3a1  
d1yc7a\_ d3bd3a\_ d4w6xb1 d1nmb1\_ d1i8ka\_ d1rjlb1 d1ypze1 d1p7kb1  
d1kxqe\_ d1gpoh1 d2z4qa1 d1w72h1 d1i9r11 d4qgya1 d4xt1c\_ d2qqnh1  
d1cica1 d3c08h1 d2cd0a\_ d2bdnh1 d1hnga1 d1mam11 d1nldh1 d1cr9h1  
d4lcih1 d3bkyh1 d3qg7l1 d1ai111 d1kxvc\_ d4iosd\_ d1l7ih1 d2x1qa\_  
d1ub6b1 d3k74b\_ d1ibgh1 d1teth1 d1igya1 d1hxma1 d2x6ma\_ d2e7la\_  
d5e03a\_ d1qfwm\_ d2r0kh1 d1igjb1 d1rurh1 d1plgh1 d1mj8h1 d1yuhb1  
d3fmg11 d1rzf11 d1emt11 d1ad9b1 d1igtb1 d1nlb11 d1d5ih1 d3k7ua\_  
d4ffyh\_ d1bwwa\_ d3dvga1 d1a6ta1 d1fgv1\_ d4qxgl1 d1mim11 d1jh11\_  
d2hffb1 d2hh0l1 d1qkzh1 d1l7t11 d1afvh1 d1iaii1 d2cjuh\_ d1um5h1  
d2ghwb2 d2ghwb1 d1kgce1 d2fgwh1 d1ikfh1 d1dvfd\_ d2i24n1 d2xtjb\_  
d1za3b1 d2yc1a\_ d2hh0h1 d2x1oa\_ d1bvka\_ d1rjla1 d5e7ba1 d1igta1  
d1i11b1 d2fb4l1 d1mvua\_ d1jpt11 d32c2a1 d1fvca\_ d1iqdb1 d2hrph1  
d2p4ab\_ d4qo1a\_ d1p2cb1 d1wt5c\_ d1t4ka1 d5c1mb\_ d1it9l1 d1bz7a1  
d1b2wh1 d1e4wl1 d1jnl11 d1yedb1 d1za6b1 d3u7aa\_ d1igfh1 d3gnm11  
d1orsa1 d1wejl1 d1a2ya\_ d1hxmb1 d1gafh1 d2j4wh1 d1pz5a1 d1j05a\_  
d1a3rh1 d4fq1l1 d1qfwh\_ d1eo8h1 d1n7mh1 d4s11a\_ d1kegh1 d5da4a\_  
d1iqw11 d3whxb1 d1vgeh1 d1deeb1 d1c12b1 d1t2ql1 d1ad9a1 d3gsnb1  
d3b2uc1 d1ggbh1 d1t3fb1 d1nak11 d4ocmc\_ d1lila1 d2v7hb3 d2esve1  
d1mcoh1 d2qr0b1 d2q3aa\_ d1ct8a1 d1kcr11 d2pxyb\_ d2uzih\_ d5c3ld\_  
d3durb\_ d1c5c11 d2ak4e1 d1d17h\_ d1xiwd\_ d1mlba1 d1rmf11 d1i7zb1  
d1dlf1\_ d2xa3a\_ d5bq7b1 d1dqqb1 d3h42l1 d1egjh1 d1kcv11 d1fe8l1  
d2j6e11 d1f3rb2 d1lk3l1 d1sm3h1 d1q0xh1 d1ghfh1 d7fab11 d1igch1  
d1lo0h1 d4idla\_ d5c2bl\_ d1jrh11 d1l11a1 d3zhda1 d4kfzc\_ d1b0wa\_  
d1e6oh1 d1mex11 d4krpb\_ d1fnsh1 d1ncwh1 d4hgma\_ d4eigb1 d4rzca\_  
d2mpa11 d4y5xa\_ d5en2b1 d3lrga1 d4ej1c1 d1rhha1 d1j05b\_ d1forh1  
d1q9wb1 d2wzpd\_ d2aq2a1 d1h0da1 d3revb1 d2ij0c1 d1tzha1 d4m7j11  
d1k6ql1 d3b9kc1 d1igml\_ d3qeua1 d1dsfl\_ d1celh1 d1kcuh1 d1zvha1  
d1zvoa1 d1tqbb1 d1ay1l1 d2qscl1 d2cgrh1 d1nl0h1 d1ken11 d3eo0a1  
d4n9ob1 d1n0xl1 d3k1kc\_ d2cqva1 d1fhga\_ d2k1ma\_ d2d12a1 d1biha3  
d1biha1 d1biha4 d3qp3a1 d1g1ca\_ d1gxea\_ d1cvsc2 d1cvsc1 d1xmwa2  
d1m4ka2 d2otpa2 d1biha2 d1rhfa2 d2fcba2 d2fcba1 d1wwbx\_ d1lepfa1  
d1lepfa2 d2dava1 d1waaa\_ d1f97a2 d1x44a1 d1vcaa2 d1fnla2 d1fnla1

d3b5ha2 d3h8na2 d3h8na1 d1jbja1 d1jbja2 d1pd6a\_ d1f2qa2 d1f2qa1  
d3cx2a\_ d1nbqa2 d3b5ha1 d1n26a1 d1xiwb\_ d1xaua\_ d1fltx\_ d2ifga1  
d1olla1 d1olla2 d1cs6a4 d1cs6a3 d1cs6a2 d1cs6a1 d2gw5a2 d1sy6a1  
d1xiwa\_ d1lucta2 d1lucta1 d1ry7b2 d1gl4b\_ d1qz1a3 d1olza1 d2c9aa1  
d1wwca\_ d1c4qa\_ d1prtc1 d2wv6d\_ d1prtf\_ d1ltrd\_ d4l63b1 d1r4pb\_  
d1prtd\_ d1tl0f\_ d2bosa\_ d3chbd\_

**Family-28 (b.29.1.3)**

**Positive dataset contains 4 protein sequences.**

d4lbqa\_ d4no4a\_ d3zsja\_ d3duia\_

**Negative dataset contains 3931 protein sequences.**

d1orva2 d1xfda2 d2xlba\_ d3m83a1 d1u08a\_ d1lc5a\_ d1b5pa\_ d2ay1a\_  
d1bw0a\_ d3pd6a\_ d7aata\_ d2csta\_ d1j32a\_ d4wlha\_ d1o4sa\_ d1v2da\_  
d1gdea\_ d1m6sa\_ d1v72a1 d1svva\_ d1ajsa\_ d1wsta1 d2f8ja2 d1lk9a\_  
d1vp4a1 d1xi9a1 d2gb3a1 d1yaaa\_ d2cfba1 d1dfoa\_ d1o69a\_ d1bj4a\_  
d3k28a\_ d2bwpa\_ d3lg0a\_ d2fnua\_ d3ou5a\_ d1z7da1 d1b9ha\_ d1iaya\_  
d4msoa\_ d1bs0a\_ d1s0aa\_ d1sffa\_ d3tqxa\_ d1mdoa\_ d3qboa\_ d3pgya\_  
d2dkja\_ d1ejia\_ d1vefa1 d4wxga\_ d3bs8a\_ d3gbxa1 d1w23a\_ d2b5aa1  
d2ofya1 d4mcxa\_ d2xi8a\_ d2icta\_ d2bnma1 d2ppxa1 d1y7ya1 d1sefa\_  
d1sfna\_ d1sq4a\_ d1c8nc\_ d1x36a\_ d1smvc\_ d1ng0c\_ d4sbvc\_ d1lopa\_  
d1f2nc\_ d1ddla\_ d1e57b\_ d1auyb\_ d1f56a\_ d1bypa\_ d1azca\_ d1ws8a\_  
d3u25a\_ d1cuoa\_ d1lid2a\_ d1rkra\_ d2iaac\_ d4dp1x\_ d1nwpa\_ d2gima\_  
d2i7sa\_ d1qhqa\_ d1gyca3 d1hfua2 d1kbva1 d1kbva2 d1sdda1 d1sdda2  
d1gyca1 d1gyca2 d1mzya1 d2bw4a1 d1aoza1 d1aoza3 d1aoza2 d1kyaa2  
d1kyaa3 d1kyaa1 d1mzya2 d4e9sa1 d1sddb1 d1sddb2 d1hfua1 d1hfua3  
d1oe1a2 d1oe1a1 d1v10a2 d1v10a3 d1v10a1 d1rypd\_ d1irua\_ d1rypc\_  
d3unfk\_ d1rypa\_ d1j2pa\_ d1irui\_ d1j2qh\_ d3unfh\_ d1m4ya\_ d1rypb\_  
d1lirul\_ d1lirug\_ d1liru2\_ d1q5rh\_ d1rypg\_ d1g3ka\_ d1liruf\_ d1q5qa\_  
d1e94a\_ d1lirub\_ d1ryph\_ d3ty6a\_ d1liruj\_ d1liruk\_ d1rype\_ d1lirud\_  
d1lirue\_ d3mi01\_ d1rypf\_ d1liruh\_ d2z3ba\_ d3mka2\_ d1lirul\_ d2bema\_  
d1pama1 d1ea9c1 d1qhoa1 d2fhfa2 d2fhfa1 d1k3ia1 d1j0ha1 d1cxl1a1  
d2bhua1 d1edqa1 d1f1sa2 d1ut9a2 d1gvia1 d1txka1 d2phla2 d2phla1  
d1fxza2 d1fxza1 d1lrha\_ d1uija1 g1dgw.1 d2v09a\_ d1uika2 d1uika1  
d1dgwa\_ d2pa7a1 d1wlta1 d1nxma\_ d2c0za1 d1ds6b\_ d1fstb\_ d1ex0a1  
d1g0da1 d4mh8a\_ d1mu2a2 d4i7ga1 d1tafa\_ d1tafb\_ d1jfib\_ d1q9ca\_  
d1h3ob\_ d2byka1 d1n1ja\_ d4g92b\_ d1bh9a\_ d1jfia\_ d1h3oa\_ d2bykb1  
d1n1jb\_ d1ydwa2 d2nvwa2 d1h6da2 d1zh8a2 d1xeaa2 d1tlta2 d1r0ka3  
d1j5pa3 d1vkoa2 d1vm6a2 d3qvsa2 d1gr0a2 d1p1ja2 d2ovga\_ d1sq8a\_  
d1rzsa\_ d3kz3a\_ d3orca\_ d3gpdg2 d2q49a2 d1hdgo2 d2g17a2 d2cvoa2  
d2czca1 d3pwka2 d1obfo2 d1i32a2 d1zyao2 d2pkqo2 d1b7go2 d2hjsa2  
d1cf2o2 d1vkna2 d1nvmb2 d4lt9a1 d3tc7a1 d3hoja\_ d1i4na\_ d3vnda\_  
d3n18a1 d1geqa\_ d3nav1 d1v5xa\_ d4a2ra1 d3tc6a1 d1ujpa\_ d4ijba\_  
d1xcfa\_ d1vc4a\_ d1rd5a\_ d1qopa\_ d3b5va\_ d2msya\_ d2djoa1 d2r5za\_  
d1au7a1 d1f43a\_ d2lmda1 d1akhb\_ d1s7ea1 d3nara\_ d1zq3p1 d2craa1  
d1mija\_ d4uuta\_ d3a01a\_ d1x58a1 d3rkqa1 d3cmya1 d2cqxa1 d2da6a1

d1e3oc1 d1fj1a\_ d1mh3a1 d1x41a1 d1wh7a1 d1gt0c1 d2mw8a\_ d1lfup\_  
d1x2ma1 d1b72a\_ d1wi3a1 d1jgga\_ d1wjha1 d1x2na1 d1mnm\_ d2cuea1  
d3k2aa\_ d2hosa\_ d2jwta2 d1pufa\_ d1ooc1 d2hi3a\_ d1b8ia\_ d4j19a\_  
d3lnqa\_ d1wh5a1 d1b8ib\_ d1fexa\_ d2cgra1 d1guua\_ d1ug2a1 d2cqqa1  
d2ajea1 d4a69c\_ d1h8ac1 d2crga1 d2iw5b1 d1xc5a1 d1ofcx1 d2cu7a1  
d1wgxa1 d2cjja1 d2ckxa1 d1gvda\_ d1hcra\_ d1tc3c\_ d1gdta1 d1u78a2  
d6paxa1 d6paxa2 d1k78a1 d1xg1a1 d1hlva1 d1hlva2 d1iufa1 d1ligna2  
d1b10a1 d1b10a2 d1d5ya1 d3lv8a\_ d1s3ga1 d1zaka1 d1s4qa\_ d3tvta2  
d1uf9a\_ d1khta\_ d1ckea\_ d1osna\_ d1p5zb\_ d4tmka\_ d3cm0a\_ d1tmka\_  
d1jaga\_ d3h86a\_ d1t0hb\_ d1nn5a\_ d2h92a\_ d3kb2a1 d2c95a1 d1yj5a2  
d1kgda\_ d1ly1a\_ d2ak3a1 d1vyva2 d1deka\_ d2grja1 d1p3ja1 d1y63a\_  
d1e4ya1 d1s96a\_ d3iija1 d1lvga\_ d1nksa\_ d1vyua2 d4e22a\_ d1qf9a\_  
d1q3ta\_ d1ki9a\_ d1lw7a2 d1teva\_ d1kjwa2 d1gsia\_ d2iyva2 d1viaa\_  
d1e6ca\_ d1odfa\_ d1uj2a\_ d4gi7a\_ d2jao1 d1z0ja1 d3umra2 d3gj0a1  
d2gaoa1 d1yzga1 d1x3sa1 d1g7sa4 d1puja\_ d1udxa2 d1kk1a3 d2o52a\_  
d1jwyb\_ d1zcaa2 d1zcb2 d2fv8a1 d2cjwa\_ d3dz8a1 d1xzpa2 d1vg8a\_  
d4qxaa\_ d2ew1a1 d1x1ra1 d2bcgy\_ d3doea1 d3cona\_ d3rega\_ d3wyga\_  
d1upta\_ d2b6ha1 d1zd9a1 d1lnza2 d1r5ba3 d1n0ua2 d1r2qa\_ d2f91a1  
d2rhda\_ d3q3jb\_ d3q85a\_ d1efma1 d1r8qa\_ d2gf9a1 d2akab1 d1ek0a\_  
d1z08a1 d2gcoa1 d2dy1a2 d4g01b\_ d2cxa1 d1svia\_ d3q72a\_ d1ni3a1  
d4ac9a4 d2erxa1 d2bmea\_ d1wxqa1 d2gf0a1 d4ldja1 d1zunb3 d1d5ca\_  
d4lv5b\_ d1efca3 d1kmqa\_ d2g6ba1 d3lrpa\_ d1tada2 d2y8ea\_ d4rd4a1  
d1z06a1 d2heia\_ d3a58b\_ d1u01a2 d1d2ea3 d1zj6a1 d2ocba\_ d3rwoa\_  
d1mr3f\_ d2e9sa1 d4u5xa1 d2iwra\_ d2fn4a1 d3bwdd\_ d2nzja1 d2atva1  
d2ksqa\_ d3l43a\_ d1mkya2 d1mkya1 d1wmsa\_ d1jnja3 d2rmka\_ d1f6ba\_  
d1f60a3 d1gota2 d1jala1 d2fh5b1 d1g16a\_ d2wblc\_ d1m7ba\_ d1wf3a1  
d1f5na2 d1t9ha2 d1z6xa1 d1z0aa1 d2fg5a1 d2a5ja1 d2bcjq2 d1s0ua3  
d1ky3a\_ d4y0va\_ d4lhwa\_ d2qmea1 d2atxa1 d1egaa1 d1ryha\_ d1moza\_  
d1nrjb\_ d2erya1 d3bfka\_ d1puia\_ d1fzqa\_ d3j3az1 d3t5ga\_ d1shza2  
d3defa\_ d2f7sa1 d3raba\_ d3tsoa\_ d3aq4a\_ d2a17a1 d3sfva1 d3bc1a\_  
d2ncda\_ d1sdma\_ d3h4sa1 d2heha\_ d2grya\_ g3kin.1 d1kk8a2 d1br2a2  
d1goja\_ d1f9va\_ d2mysa2 d1lkxa\_ d3t0qa\_ d4db1a1 d3gbja\_ d1ry6a\_  
d1v8ka\_ d1k8ka2 d1k8ka1 d3uleb1 d3i33a2 d3i33a1 d1bupa1 d1dkgd2  
d1dkgd1 d4ci6a2 d1jcfa1 d4a2ba2 d2fxua1 d1yaga2 d1yaga1 d4cbua2  
d1g99a1 d2e1za2 d2e1za1 d1saza1 d1saza2 d1ig8a1 d1czan2 d1czan3  
d1czan1 d1ig8a2 d1czan4 d1bg3a4 d1bg3a2 d1bg3a1 d1nira1 d1qksa1  
d1zc6a1 d1zbsa1 d1zbsa2 d1zc6a2 d2ch5a2 d2ch5a1 d1zxo2 d1zxo1  
d1hroa\_ d4gedb\_ d3zooa\_ d1mz4a\_ d1gu2a\_ d1f1fa\_ d1dvva\_ d1c6ra\_  
d1c75a\_ d1e29a\_ d1gdva\_ d1cnoa\_ d1h32b\_ d2bh4x\_ d2aiua\_ d5cytr\_  
d1jdl1a\_ d1i8oa\_ d2zboa\_ d3dmia\_ d1ls9a\_ d1wvec\_ d2yk3a\_ d3ph2b\_  
d1dw0a\_ d5aura\_ d1ql3a\_ d1qn2a\_ d1f1ca\_ d1evsa\_ d1cnt1\_ d1pvhb\_  
d1z7ca\_ d1huwa\_ d1bgea\_ d1rhga\_ d1f6fa\_ d1f45b\_ d1i1rb\_ d1axia\_  
d4x51a\_ d1d9ca\_ d4ypgc1 d3oq3a\_ d1lqsl\_ d1n1fa\_ d1lau1a\_ d1wu3i\_  
d3bes1\_ d3ux9a\_ d1v8fa\_ d2ejca\_ d3mua1 d3q12a1 d2b71a\_ d3rbaa\_



d2qtra\_ d1nupa\_ d3l92a\_ d1f9aa\_ d1qjca\_ d2h29a\_ d1vlha\_ d1od6a\_  
d1mrza2 d4ruka\_ d2e17a\_ d1liq0a2 d1lirxa2 d1r6ta2 d1ivsa4 d2cyba\_  
d1rqga2 d1j09a2 d2yxna\_ d1f7ua2 d1h3fa1 d1ffya3 d2g36a1 d1jila\_  
d1n3la\_ d1i6la\_ d1pfva2 d1h3na3 d3n9ia\_ d3sz3a1 d3sw2a\_ d1moxc\_  
d1dx5i3 d1edmb\_ d1autl2 d1autl1 d1nqlb\_ d1dval1 d1szba2 d1kigl\_  
d2y5fl\_ d1ijqa2 d1gk5a\_ d1g1sa2 d1nt0a3 d1xdtr\_ d1lmja2 d1lmja1  
d1nzia2 d2wphe\_ d1klil\_ d1pfxl2 d1pfxl1 d1p9ja\_ d1g1ta2 d1f7ea\_  
d4yzub\_ d2mgpa1 d1b9wa1 d1b9wa2 d2mgpa2 d1ob1c1 d1ob1c2 d1n1ia1  
d2npra2 d2npra1 d1qx2a\_ d1ig5a\_ d2y5ia\_ d1psra\_ d3n22a\_ d2egda\_  
d4ggfc\_ d2wcea\_ d2luca\_ d4aqia\_ d3nsia\_ d2lp3a\_ d1j55a\_ d1a4pa\_  
d1k8ua\_ d1nsha\_ d1pvaa\_ d3fs7a\_ d2pvba\_ d1ttxa\_ d1rwy\_ d2kyfa\_  
d1rk9a\_ d1exra\_ d1tiza1 d1nyaa\_ d1g8ia\_ d1wdcc\_ d3fwba\_ d1ggza\_  
d2o5ga\_ d1ctaa\_ d1m45a\_ d3i5gc\_ d1sl8a\_ d1fpwa\_ d2scpa\_ d2roaa\_  
d4aqra\_ d3pn7b\_ d1br1b\_ d2mysb\_ d1s6ca\_ d1bjfa\_ d2obha\_ d1jfka\_  
d1jf0a\_ d1qv0a\_ d1lkja\_ d2mlfc\_ d2m97a\_ d2d8na\_ d4by5a\_ d1jbaa\_  
d4nqga\_ d1wdcb\_ d2mysc\_ d1j7qa\_ d1s6ia\_ d1uhka2 d1r2ua\_ d1dtla\_  
d3kf9a\_ d3pn7c\_ d5d67d\_ d1tuza\_ d1h8ba\_ d1leg3a2 d2zkmx1 d1snla\_  
d1gjya\_ d1ylxa\_ d1hqva\_ d1dvia\_ d1df0a1 d4usla\_ d1k94a\_ d1sfsa\_  
d1jfxa\_ d1wkya2 d1uuqa\_ d3wh9a\_ d4mlra\_ d1xyza\_ d4xuya\_ d2je8a5  
d4bf7a1 d3cuia\_ d1ur4a\_ d1qw9a2 d1odza\_ d2vzsa5 d1bqca\_ d2x2ya1  
d1hjqa\_ d1qnra\_ d4y7ea1 d1vjza\_ d4k68a\_ d2v3ga\_ d4hpga\_ d1nofa2  
d1nq6a\_ d1h4pa\_ d1aq0a\_ d3ziza\_ d4bs0a\_ d1ecea\_ d1h1na\_ d1ta3b\_  
d1w91a2 d1ilwa\_ d1uhva2 d1us3a2 d1legza\_ d7a3ha\_ d1tvna1 d3nyda1  
d1ghsa\_ d2cyga1 d4xv0a\_ d2c8na2 d1w32a\_ d3emca\_ d1v6ya1 d1foba\_  
d2uwfa1 d2fgla\_ d3niya1 d2c0ha1 d1rh9a1 d1yq2a5 d1szna2 d1fa2a\_  
d1pama4 d5do8a1 d1ea9c3 d2fhfa5 d1qhoa4 d1avaa2 d1m53a2 d4m8ua1  
d2gjpa2 d1lwha2 d4howa1 d1ktba2 d1j0ha3 d3vm5a1 d2x1ia\_ d1wzaa2  
d1uasa2 d2diea1 d1mxga2 d1ht6a2 d1eswa\_ d1iv8a2 d5cpsa\_ d1ud2a2  
d1zjaa1 d3gbea1 d1kwga2 d1wdpa\_ d1gcya2 d1g5aa2 d1hvxa2 d3dhpa2  
d2bhua3 d4do4a1 d3qgva1 d1e43a2 d1g94a2 d2d3na2 d1gjwa2 d1gvia3  
d1x1na1 d1r7aa2 d1tz7a1 d4toqa\_ d1wb0a1 d1w9pa1 d1eoka\_ d1itxa1  
d1kfwa1 d1goia2 d1edqa2 d2gsja\_ d1hjxa1 d1jnda1 d1vf8a1 d1etob\_  
d1umqa\_ d1mixa2 d1e5wa2 d1j19a2 d1isna2 d2a16b2 d1g4ma1 d1g4ma2  
d2hmta\_ d1lssa\_ d1b9ra\_ d1offa\_ d1frra\_ d3wcqa\_ d1e9ma\_ d1l5pa\_  
d1wria\_ d1i7ha\_ d3av8a\_ d1czpa\_ d1rfka\_ d3plma1 d3b2ga\_ d2bt6a2  
d3nvva1 d1krha3 d2h88b1 d1n62a2 d1t3qa2 d1kf6b2 d1zoyb1 d1jq4a\_  
d1ffva2 d1dgja2 d1rm6c2 d1h6ta1 d1h6ua1 d9ldta1 d2ewda3 d1up7a1  
d2dfda1 d1s6ya1 d1vjta1 d7mdha1 d1hyea1 d1t2da1 d1ojsa3 d1ldna1  
d1hyha1 d1civa1 d2a92a1 d1ez4a1 d1i0za1 d1y6ja1 d1gv0a1 d1ur5a1  
d1llda1 d1obba1 d1v8ba1 d1gdha1 d1l7da1 d2llda1 d1mx3a1 d1ygya1  
d1qp8a1 d1li4a1 d1j4aa1 d2naca1 d1txga2 d3f47a1 d2pv7a2 d1xc2a3  
d2ahra2 d4xiya1 d2f1ka2 d1pgja2 d1i36a2 d1np3a2 d1lj8a4 d1teaa3  
d1qmgga2 d2i76a2 d2g5ca2 d1wdka3 d1dlja2 d3cuma3 d1kola2 d1f8fa2  
d1qora2 d1jqba2 d1vj0a2 d1cdoa2 d1gu7a2 d1d1ta2 d1xa0a2 d2dm6a2

d1jvba2 d1rjwa2 d1llua2 d1tt7a2 d1piwa2 d1o89a2 d1iz0a2 d1e3ja2  
d1yb5a2 d1uufa2 d1vj1a2 d1e3ia2 d3gpdg1 d1vc2a1 d2nvwa1 d1u8fo1  
d1ydw1 d1hdgo1 d2g17a1 d1cf2o1 d2czca2 d1r0ka2 d1obfo1 d2cvoa1  
d1ebfa1 d1h6da1 d1i32a1 d1zh8a1 d2q49a1 d1qkia1 d1j5pa4 d3pzra1  
d1xeaa1 d1vkoa1 d1vm6a3 d3qvsa1 d2pkqo1 d1b7go1 d1gr0a1 d1p1ja1  
d1lc0a1 d1j0xo1 d3pwka1 d2hjsa1 d1zyao1 d1vkna1 d1tlta1 d1nvmbl  
d3sjua\_ d3ojfa1 d1xu9a1 d2jjya1 d1n7ha\_ d1y1pa1 d1h5qa\_ d1jtva\_  
d4fs3a\_ d2bkaa1 d1gy8a\_ d2c5aa1 d1ulsa\_ d1ooea\_ d2b69a1 d1y5ma1  
d1spxa\_ d1aela\_ d1bxka\_ d1ydea1 d1gega\_ d1hdoa\_ d1o5ia\_ d1e6ua\_  
d1snya1 d2rhca\_ d3zv4a\_ d5ceja\_ d2d1ya1 d1fjha\_ d3w8ea\_ d2fmua1  
d1x1ta\_ d1rpna\_ d3ay7a1 d1k2wa\_ d1eq2a\_ d2hrba1 d3ruaa\_ d2ew8a1  
d4hwka\_ d1xgka\_ d2bd0a1 d1yo6a1 d2a35a1 d2ntva\_ d1vl8a\_ d1hdca\_  
d4bkua\_ d2ag5a1 d2q45a\_ d1nffa\_ d4iy1a\_ d1zbqa1 d1kewa\_ d1ek6a\_  
d1ja9a\_ d2q46a2 d1iy8a\_ d1cyda\_ d2ptga\_ d1hxha\_ d1uzma1 d3lyla\_  
d4m89a\_ d3wyea\_ d2b1la1 d1w6ua\_ d1sb8a\_ d2q2va\_ d4nr0a\_ d1e6wa\_  
d2gasa\_ d3oiga1 d2bgka1 d1mxha\_ d1vl0a1 d1rkxa\_ d1r6da\_ d1wmaa1  
d1e7wa\_ d2c07a1 d1xkqa\_ d3tzha\_ d1g0oa\_ d3lz6a\_ d1qyca\_ d1ledoa\_  
d1gz6a\_ d1oc2a\_ d1t2aa\_ d1zema1 d2xoxa\_ d1z45a2 d1geea\_ d1p33a\_  
d3lt0a\_ d4e6pa\_ d2wyua\_ d1db3a\_ d4q9na\_ d1xhla\_ d4o1ma\_ d1fmca\_  
d2uvda\_ d2gdza1 d1uaya\_ d2z1ma\_ d2o23a2 d2fr1a2 d2fr1a1 d1qsga\_  
d1qyda\_ d4zjua\_ d2a4ka1 d1yb1a\_ d1wvga1 d1yxma1 d3f4ba\_ d1mg5a\_  
d1xg5a1 d1r55a1 d3gboa\_ d1atla\_ d1kufa\_ d4q1la\_ d1quaa\_ d1yp1a\_  
d1wnia\_ d3nqyb\_ d4gera\_ d1bqba\_ d1ex0a4 d1g0da4 d2f4ma1 d1x3za\_  
d1mdwa\_ d1qxp4 d1ziva1 d1zcma1 d3ioqa\_ d1fh0a\_ d1o0ea\_ d1khqa\_  
d1m6da\_ d2cb5a\_ d1cs8a\_ g8pch.1 d1s4va\_ d2pnsa\_ d1vsna1 d1mira\_  
d1iwda\_ d2oula\_ d7pcka\_ d3bwka\_ d3bcna\_ d2p86a\_ d1pvja\_ d1pcia\_  
d1deua\_ d4bs6a\_ d1xkga1 d1cqda\_ d1jqpa2 d2c0ya\_ d2bdza\_ d3p5ua\_  
d1zoya1 d1qo8a2 d1d4ca2 d1chua2 d1jnra2 d1kf6a2 d2jk6a2 d2jk6a1  
d1feca1 d1feca2 d1lpfa1 d1lpfa2 d1xhca1 d1xhca2 d1dxla2 d1dxla1  
d1gera2 d1m6ia2 d1onfa1 d1onfa2 d3lada2 d3lada1 d1w4xa1 d1w4xa2  
d1gesa2 d1mo9a1 d1xdia1 d1fl2a2 d1fl2a1 d1fcda1 d1fcda2 d1h6va2  
d1h6va1 d1mo9a2 d1gv4a2 d1gv4a1 d2gv8a2 d2gv8a1 d1aoga1 d1aoga2  
d1hyua1 d1ebda1 d1ebda2 d3dk9a1 d1q1ra2 d1q1ra1 d1gesa1 d1zbf1a1  
d2z1ha\_ d2etja1 d3qioa1 d1j11a\_ d2e4la\_ d1j12a\_ d21sna1 d1io2a\_  
d1uaxa\_ d2yv0x\_ d1lekea\_ d1i39a\_ d1pn0a1 d1reoa1 d1ju2a1 d2f5va1  
d3c96a1 d2gmha1 d1pj5a2 d1gpea1 d1n4wa1 d1k0ia1 d2dw4a2 d2ivda1  
d1seza1 d2voua1 d1kdga1 d1s5ja1 d2hbja2 d2igia\_ d1wlja\_ d1qhta1  
d4dle1 d1tgoa1 d2f96a1 d3tr8a1 d3mxma\_ d1q8ia1 d1y97a1 d1w0ha\_  
d1kfsa1 d2py5a1 d1noya\_ d1d5aa1 d1yt3a3 d2guia\_ d3mwpa1 d4kb1a\_  
d2v76a\_ d1wj1a1 d1aqca\_ d1qqga1 d1ntva\_ d1n3ha\_ d4dbba\_ d3f0wa1  
d1p3ra\_ d1wgua1 d2cy4a1 d3hqca\_ d1wvha1 d1xr0b1 d1tq5a1 d1jmx4  
d1pbya3 d1pbya4 d1r7ha\_ d1faaa\_ d1wika1 d1xfla\_ d1ttza1 d2f51a1  
d1ti3a\_ d1nhoa\_ d1sena\_ d2i4aa\_ d1ep7a\_ d1zmaa1 d3lefa1 d3diea1  
d2yana1 d1z6na1 d1oaza\_ d3zywa1 d4aj8a\_ d1nm3a1 d4fiwa\_ d1wmja\_

d4hs1a1 d1liloa\_ d1xwaa1 d1lwjka1 d2vm1a\_ d1fb6a\_ d1gh2a\_ d1h75a\_  
d1nw2a\_ d1kx5b\_ d3a6na\_ d4m6ba2 d2nqbd\_ d3wkjd\_ d2yfwe\_ d4h9na\_  
d5bnxa\_ d1kx5c\_ d3r45a\_ d1eqzb\_ d4jjnb\_ d1f66c\_ d1eqza\_ d4wnnb\_  
d1kx5a\_ d1u35c1 d1lid3a\_ d2nqbc\_ d1kx5d\_ d3us3a3 d3us3a1 d2b5ea2  
d2b5ea3 d2b5ea1 d2b5ea4 d2kp1a1 d2kp2a1 d1hyua3 d1hyua4 d1j08a1  
d1j08a2 d1pd212 d1nhya2 d2a2ra2 d1k0dd2 d1f2ea2 d1gsua2 d1f3ba2  
d2fhea2 d2pvqa1 d1tw9a2 d1oyja2 d1e6ba2 d1k0ma2 d3ik7a1 d4is0a1  
d1r5aa2 d1jlva2 d1m0ua2 d3gtub2 d1z9ha2 d1okta2 d1axda2 d2gsra2  
d1tu7a2 d1k3ya2 d1zgma1 d1b48a2 d1gnwa2 d1gwca2 d2gsta2 d1glqa2  
d1oe8a2 d1pn9a2 d1v2aa2 d1fw1a2 d1duga2 d1g7ea\_ d1dosa\_ d3qm3a1  
d2fjka\_ d1m32a\_ d1libja\_ d1c7na\_ d1iuga\_ d4q75a\_ d2bkwa1 d1t3ia\_  
d1n8pa\_ d1qz9a\_ d1jff9a\_ d1p3wa\_ d3kgwa\_ d1c11a\_ d2ctza1 d1vjoa\_  
d2rfva\_ d1gc0a\_ d1cs1a\_ d1d2fa\_ d2ch1a1 d1qgna\_ d1pffa\_ d1elua\_  
d1npya1 d3t4ea2 d1a4ia1 d1o0sa1 d2hk9a2 d2egga2 d1b26a1 d1bvua1  
d1gq2a1 d1c1da1 d1leha1 d1gtma1 d1euzal d1nvtal d3dona2 d1ledza1  
d1gpja2 d1vi2a1 d1p77a1 d1nyta1 d1b0aa1 d1vl6a1 d1v9la1 d3h1jd1  
d1qsaa2 d4ilya\_ d4olta\_ d1qgia\_ d1qqya\_ d1gd6a\_ d1f6ra\_ d1livma\_  
d2gv0a\_ d1iiza\_ d2z2fa\_ d1j8xa\_ d1ghla\_ d1b9oa\_ d1741a\_ d1691a\_  
d2o4wa\_ d1p37a\_ d1k28a3 d1xjta1 d1jtma\_ d2f2qa\_ d4e97a1 d1s5ja2  
d1qhta2 d4dlea2 d1tgoa2 d3py8a2 d1q8ia2 d1kfsa2 d2py5a2 d1d5aa2  
d1qsta\_ d2beial d4m3sa\_ d1u6ma1 d1yk3a1 d3dr6a\_ d1xmta\_ d1z4ea1  
d2ge3a1 d1bo4a\_ d2fiaa1 d2jdca1 d1y9wa1 d3to7a\_ d1wwza1 d2fl4a1  
d2ozua1 d2b5ga\_ d2cy2a1 d2p0wa\_ d1cm0a\_ d4pswa\_ d1yrea1 d1yr0a1  
d1m4ia\_ d2gana1 d1yvka1 d1ghea\_ d2g3aa1 d1y7ra1 d2eui1 d1q2ya\_  
d2fsra1 d1xeba\_ d2ae6a1 d1cjwa\_ d1qsma\_ d2aj6a1 d1y9ka1 d1i12a\_  
d1vkca\_ d2atral d1n71a\_ d2d4pa1 d2fiwa1 d2fe7a1 d1tiqa1 d2ou2a\_  
d1yx0a1 d2fcka1 d1p0ha\_ d2j8ma\_ d2pq8a\_ d1z4ra1 d1s3za1 d1ufha\_  
d2hqya1 d2hqya2 d1ne9a1 d1lrza3 d1ne9a2 d1xvqa1 d1pn0a2 d3hy2a\_  
d2cvba1 d1o8xa\_ d1lu4a\_ d1we0a1 d2bmx1 d2a4va1 d1psqa\_ d1xiya1  
d1q98a\_ d1n8ja\_ d1zofa1 d2ggta\_ d3tjja\_ d4je1a1 d1o73a\_ d3s9fa\_  
d2zcta\_ d1qmva\_ d1jfu1 d2b1ka\_ d5dvba1 d2b5xa1 d2v2ga\_ d3tb2a\_  
d41lra\_ d4fh8a1 d1e2ya\_ d1knga\_ d2h30a\_ d1i5ga\_ d2z9sa\_ d2f8aa1  
d1tp9a1 d2b7ka\_ d1nm3a2 d3hvva\_ d2wfca1 d4kcea\_ d1xvwa1 d4gqca1  
d3qpma\_ d4k1fa\_ d1zzoa1 d1gp1a\_ d1prxa\_ d1f74a\_ d3l21a\_ d2e1da\_  
d1to3a1 d1w3ia\_ d1sfla\_ d1n7ka\_ d1vcva1 d4imea\_ d1wa3a\_ d2ocza1  
d1f2ja\_ d3m16a\_ d2yxga\_ d3a5fa\_ d1fbaa\_ d1l6wa\_ d1xfba1 d1wx0a1  
d1vpxa1 d1ojxa\_ d1mxsa\_ d2a4aa1 d1xkya1 d3cq0a1 d3s1xa\_ d1f05a\_  
d1fdja\_ d3cp1a1 d4d2ja\_ d1cg2a1 d1yloa2 d1y7ea2 d1y0ya3 d1lfwa1  
d1vixa1 d1fnoa4 d1vhoa2 d1ysja1 d1vhea2 d1z21a1 d2fvga2 d1vgya1  
d1r3na1 d2grea2 d1xmba1 d1rtqa\_ d1ys1x\_ d4hs9a\_ d1ispa\_ d1ku0a\_  
d3qmma\_ d1ra6a\_ d1muka\_ d3gsza\_ d1khva\_ d1te9a\_ d2xwha\_ d3uqsa\_  
d3hkwa\_ d3n6ma\_ d2cjqa\_ d2xyma\_ d1teba\_ d1te8a\_ d1u09a1 d4wfxa\_  
d3tyqa\_ d2pgga1 d2h1ia1 d2r8ba1 d3b5ea1 d3cn9a\_ d3ia2a\_ d1a88a\_  
d4dqqa1 d1hkha\_ d1zoia\_ d3zxha\_ d1cgl1 d1rm8a\_ d1leaka2 d1hy7a\_

d2jsda\_ d1cxva\_ d1hv5a\_ d1i76a\_ d1eb6a\_ d3p0ya1 d1igra1 d1igra2  
d1n8yc2 d1n8yc1 d1m6ba2 d1m6ba1 d1dzka\_ d4tlja\_ d2a2ua\_ d4wfva\_  
d3t1da\_ d4iaxa\_ d3zq3a\_ d2nnda\_ d1i4ua\_ d1kxoa\_ d1bbpa\_ d1kt7a\_  
d1exsa\_ d3s26a1 d1lf7a\_ d1qfta\_ d4gh7a\_ d1z24a1 d1qabe\_ d1xkia\_  
d1ew3a\_ d3bx7a\_ d4iawa1 d1gkab\_ d3kzaa\_ d2k23a\_ d2l9ca1 d2joza1  
d1gm6a\_ d3kffa\_ d3saoa1 d1e5pa\_ d1yupa1 d1iiua\_ d1i26a\_ d1cixa\_  
d1y29a\_ d1v7fa\_ d2jtba\_ d1d1ha\_ d1g9pa\_ d1lupa\_ d1qk7a\_ d1mb6a\_  
d2a2va\_ d1niya\_ d1i25a\_ d1hvwa\_ d2mpqa\_ d1kqha\_ d1la4a\_ d2mxoa1  
d1d10a\_ d1koza\_ d1qk6a\_ d1emxa\_ d1lqra\_ d1c6wa\_ d1rmka\_ d1ixta\_  
d1eyoa\_ d1cnna\_ d1g1pa\_ d1f3ka\_ d1fyga\_ g1f8v.1 d1novc\_ g1gk9.1  
g1cp9.1 g1e3a.1 d1mqta\_ d1d4m3\_ d1fmd3\_ d2mev1\_ g1aym.1 d1ev13\_  
d4q4w1\_ d1r1a3\_ d2x5ia\_ d1rhi1\_ g1r1a.1 g1d4m.1 g1rhi.1 d1b35b\_  
d1loopa\_ d1tme1\_ d4iv1a\_ g1pvc.1 g1fpn.1 d1fpn1\_ d4gb31\_ d1d4m1\_  
d1fmd1\_ d1ev11\_ d2wzr3\_ g1cov.1 d1qqp3\_ g1fmd.1 d2x5ic\_ d1rhi3\_  
g1oop.1 d1hxs1\_ g1hxs.1 d1fpn3\_ d1bev1\_ g2mev.1 d1eah3\_ d1aym1\_  
d1pvc3\_ d1qqp1\_ d1zba3\_ d1h8ta\_ d3vbhc\_ g1b35.1 g1bev.1 d1hxs3\_  
g1ev1.1 d1bev3\_ g1tmf.1 d1tmf1\_ d1b35a\_ d2mev3\_ g1eah.1 g1h8t.1  
d1eah1\_ d4q4w3\_ d1r1a1\_ d1aym3\_ d1pvc1\_ d1zba1\_ d1h8tc\_ d1loopc\_  
d1tme3\_ g1qqp.1 d4iv1c\_ g1tme.1 d1y14b1 d2nn6i1 d1i94l\_ d2zjra2  
d1smxa\_ d2qamc2 d1hh2p1 d2r7da1 d1r12a2 d1wfqa1 d3bzka4 d1x6oa2  
d3a0ja\_ d2j01d2 d2ja9a1 d4q15a\_ d1hr0w\_ d1luza\_ d2n3sa\_ d2vnud1  
d1h95a\_ d1go3e1 d2nn6h1 d1ne3a\_ d2mola\_ d1iz6a2 d1jjga\_ d1e3pa2  
d2ix0a3 d2ix0a2 d2lxja\_ d1ueba3 d1ueba2 d2z0sa1 d1u0la1 d2ix0a1  
d2eifa2 d2je6i1 d3i2za1 d2c35b1 d2ahob2 d1t9ha1 d3i4oa\_ d2qall1  
d1jt8a\_ d2nn6g1 d1g6pa\_ d3cama\_ d1i94q\_ d1c9oa\_ d1d7qa\_ d2ba0a1  
d2vnud2 d2vnud3 d1khia2 d2qalq1 d1wi5a1 d1xtda2 d1ny4a\_ d4w9ta\_  
d1jvna1 d4x2ra1 d1qo2a\_ d4axka1 d1thfd\_ d1h5ya\_ d4u28a\_ d2y88a\_  
d4wd0a\_ d1vzwa1 d1eixa\_ d3exra\_ d2ffca1 d2fdsa1 d3n3ma1 d2czda\_  
d1q6oa\_ d2yyua\_ d1vqta1 d1dbta\_ d3ldva1 d1ux8a\_ d1dlya\_ d4i0va\_  
d2bkma\_ d1dlwa\_ d2bmma\_ d2r80b\_ d1cqxa1 d1cg5a\_ d1gcvb\_ d3boma\_  
d2h8fb\_ d2raoa\_ d3bj1a\_ d4hrrb\_ d2r50a\_ d3d1kb\_ d2aa1b1 d3zhwa\_  
d3hf4b\_ d3gdja\_ d1jebb\_ d3bj1b\_ d1x9fb\_ d1wmub\_ d1gcva\_ d3bcqb\_  
d3d4xb\_ d1gvha1 d2dc3a\_ d3hf4a\_ d4yu3a\_ d3k8ba\_ d1qpwb\_ d2r80a\_  
d3bcqa\_ d1v4wa\_ d3wtgb\_ d1jl7a\_ d4esaa\_ d1a9we\_ d3d1ab\_ d1fsla\_  
d4h21a\_ d1v4wb\_ d1mwca\_ d1vhba\_ d1jeba\_ d1spgb\_ d1h97a\_ d1q1fa\_  
d1tu9a1 d3d1aa\_ d1hdsb\_ d3hyub\_ d2zffb\_ d3fs4a\_ d1oj6a\_ d1shrb\_  
d4h21b\_ d4yu3b\_ d1spga\_ d3hrwa\_ d3qqra\_ d3at5a\_ d4wchd\_ d3hyua\_  
d1cg5b\_ d1uc3a\_ d1hbra\_ d2raob\_ d1outb\_ d4esab\_ d3gdjb\_ d3qqqa\_  
d1x9fc\_ d3vrfa\_ d1litha\_ d3mkba\_ d3d4xa\_ d3mjpa\_ d1jl6a\_ d3fh9a\_  
d1outa\_ d2dc3b\_ d1it2a\_ d3eoka\_ d3g46a\_ d1qpwa\_ d3vrfb\_ d1ch4a\_  
d1x9fd\_ d1hdsa\_ d2zfb\_ d3mkbb\_ d3wtga\_ d1a4fa\_ d3fh9b\_ d3bomb\_  
d3cy5a\_ d3at5b\_ d1x9fa\_ d2oifa\_ d4lmb\_ d1cpcb\_ d3v57a\_ d1kn1a\_  
d1cpca\_ d4f0ta\_ d2vjha\_ d4po5b\_ d1eyxa\_ d1alla\_ d4f0tb\_ d1b8db\_  
d4h0mb\_ d1b33a\_ d2vjhb\_ d4lm6b\_ d2vmlb\_ d1allb\_ d2vjta\_ d3dbja\_

d2vmla\_ d2vjtb\_ d4f0ub\_ d1f99b\_ d4rmpa1 d1liaa\_ dleyxb\_ d2uulb\_  
d4lmsb\_ d4f0ua\_ d2bv8a\_ d1f99a\_ d2bv8b\_ d2c7lb\_ d3dbjb\_ d4rmpb1  
d1b8da\_ d4h0ma\_ d3v57b\_ d1kn1b\_ d1liab\_ d2uula\_ d2j96a\_ d2xqfa\_  
d1ea5a\_ d1dx4a\_ d1qe3a\_ d1k4ya\_ d4qwwa\_ d2ha2a\_ d3c8da2 d2pbla1  
d1jkma\_ d1jjia\_ d1lzl1\_ d1jjfa\_ d1xm5a\_ d1xaxa\_ d1tvia\_ d4iuua3  
d4bvva\_ d5hpga\_ d3k65a\_ d1ki0a3 d1ki0a2 d1ki0a1 d1a0ha1 d1pmla\_  
d3sp8a3 d2feba1 d3ulra1 d1kapp2 d1k7ia2 d2m5ta\_ d1cqqa\_ d1wqsa\_  
d5bpea\_ d2ipha\_ d2bhga1 d3tnta\_ d3sjia\_ d3d23a1 d2fyqa\_ d3tloa\_  
d3zvea1 d2hrva\_ d3q3ya1 d4asha1 d1e88a1 d1l6ja4 d1leaka4 d1leaka3  
d1l6ja3 d1h8pa2 d1h8pa1 d3rp2a\_ glucy.1 d1fuja\_ d2zchp\_ d3w94a\_  
d1si5h\_ d1lo6a\_ g2pka.1 d1cgha\_ d1kigh\_ d1a5ia\_ d3s9ba\_ d1hj8a\_  
d1ao5a\_ d2anya\_ d1q3xa1 d1gvza\_ d1azza\_ d4gsoa\_ d2f91a1 d1liaua\_  
d1gdna\_ d1eufa\_ g1fiw.1 d1eq9a\_ d4nfea\_ d2rdla\_ d1spja\_ d1elva1  
d1a7sa\_ d1ekbb\_ d1pfxc\_ d1yc0a\_ d2aiqa\_ g1fiz.1 d1fi8a\_ d4k60a\_  
d4dgja\_ d1mzaa\_ d1op0a\_ d3tjva\_ d1pytd\_ d1sgfg\_ g1gg6.1 d2eeka\_  
g1rtf.1 d1a0ja\_ d3g01a\_ d1pytc\_ d4e7na\_ d1ddja\_ d1z8ga1 d2hlca\_  
d1npma\_ d1brup\_ g1jou.1 d1sgfa\_ d1autc\_ g2hnt.1 g1kdq.1 d3s69a\_  
d4crga\_ d1fxya\_ d1bqya\_ d2ftba\_ d1pmpa\_ d2rcqa1 d1fdqa\_ d4lkpa\_  
d1sa8a\_ d1vyfa\_ d1lpja\_ d3vg7a1 d4azqa1 d1o8va\_ d5bvqa\_ d1p6pa\_  
d2qo4a\_ d1opba\_ d1yiva1 d1o1va\_ d4bvma1 d4tkba\_ d4i3ba\_ d1bwya\_  
d1ftpa\_ d4gkca\_ d1cbia\_ d3p6da1 d1kqwa\_ d2a0aa1 d1m4la\_ d2bk7a\_  
d3fjua\_ d1z5ra1 d1kwma1 d1uwya2 d1jqga1 d2c1ca1 d1dtda\_ d1h8la2  
d3lgia\_ d3i77a\_ d2z9ia2 d4nsva\_ d1lcya2 d4jcna\_ d1os8a\_ d1hpga\_  
d1p3ca\_ d1l1ja\_ d1qtfa\_ d1e69a\_ d1mv5a\_ d3g60a4 g1ii8.1 d1ewqa2  
d1ji0a\_ d1qhla\_ d1v43a3 d2wmfa1 d1vpla\_ d1g2912 d4a82a2 g1f2t.1  
d2d62a1 d3tuic1 d2bbsa1 d3g60a3 d2ixea\_ d1g6ha\_ d1sgwa1 d2qi9c\_  
d3rlfa1 d3b60a1 d3d31a2 d2pzea1 g1xew.1 d1jj7a\_ d1oxxk2 d2onka1  
d1wlwa\_ d1liwa\_ d1qf5a\_ d1vmaa2 d1nija1 d1np6a\_ d2p67a1 d3ihla\_  
d1okkd2 d1l1s1a2 d1s1ma2 d1liona\_ d2v40a\_ d3hida\_ d2vo1a1 d2g0ta1  
d1vcoa2 d1j8mf2 d1g3qa\_ d1xjca\_ d1p9ba\_ d1qzxa3 d1ihua2 d1ihua1  
d2qm8a\_ d1dj2a\_ d4ioja\_ d1cp2a\_ d1yrba2 d1hyqa\_ d3gqba2 d1skye3  
d1xp8a1 d1tf7a2 d1tf7a1 d1ye8a1 d1skyb3 d2qe7d2 d4blta\_ d4huta\_  
d3l1daa2 d4hyya\_ d2i3ba1 d1cr1a\_ d3j9tb2 d3ntua2 d1vdza1 d2z43a\_  
d1e9ra\_ d3ziaa2 d1n0wa\_ d1g6oa\_ d3ziad2 d3j9ta2 d1pzna2 d3gqbb2  
d2i49a\_ d1nnfa\_ d1xvxa\_ d1ursa\_ d1h3da1 d1iuda\_ d4m1va1 d1twya\_  
d3e13x\_ d2nxoa1 d4pfua\_ d3ttma\_ d1elja\_ d2qmwa1 d1us5a\_ d1y3na1  
d1jeta\_ d1uqwa\_ d4f19a1 d2esna2 d3thia\_ d3fasa1 d2uyeb\_ d2xwva1  
d1r9la\_ d2fyia1 d1pb7a\_ d2ozza1 d1sw5a\_ d1nh8a1 d1vr5a1 d2g29a\_  
d1xs5a\_ d3lswa\_ d2z23a\_ d3w9va\_ d3tcha\_ d1q35a\_ d1z7me1 d3q27a\_  
d1p99a\_ d1ve4a1 d2i6ea1 d4mcoa1 d4n8ya\_ d1eu8a\_ d1zba1 d1hsla\_  
d1ixca2 d1j1na\_ d1xvya\_ d1y9ua\_ d2z22a1 d1xoca1 d4oera\_ d1wdna\_  
d5f1qa1 d1xt8a1 d1i6aa\_ d4gwoa\_ d4igta1 d1pc3a\_ d4mmpa1 d1o63a\_  
d2czla1 d2onsa2 d4mija1 d4ok5a1 d2bmfa1 d2bmfa2 d1yksa1 d1yksa2  
d1jr6a\_ d2qeqa1 d2j1qa1 d1a1va2 d1eh3a\_ d3skpa\_ d1dtza2 d1ieja\_

d1jnfa2 d1ce2a1 d1jnfa1 d1b1xa2 d1b1xa1 d1jw1a1 d1jw1a2 d1ryoa\_  
d1h76a1 d1h76a2 d1c4oa1 d2p6ra3 d2p6ra4 d1oywa3 d1wrba1 d1w36b2  
d1w36b1 d1c4oa2 d3bora\_ d1t6na\_ d2eyqa5 d2eyqa3 d2eyqa2 d2zu6a2  
d1veca\_ d1uaaa1 d1w36d1 d2g9na1 d1z3ix2 d2rb4a\_ d1hv8a1 d1hv8a2  
d1t5ia\_ d1w36c2 d2j0sa2 d2j0sa1 d1fuka\_ d3hjha1 d1z5za1 d1qdea\_  
d1z63a1 d1s2ma2 d1s2ma1 d1wp9a1 d1wp9a2 d1gm5a3 d1gm5a4 d3dina4  
d3dina3 d1q0ua\_ d1w36c1 d1z3ix1 d1nkta3 d1nkta4 d1uaaa2 d1w36d2  
g1qhh.1 d2fwra2 d2fwra1 d3q3ma\_ d1za0a1 d1mxra\_ d2inca\_ d1jk0a\_  
d2incb\_ d1mhyb\_ d3hf1b\_ d1mtyb\_ d1r2fa\_ d2uw1a\_ d1mhyd\_ d3n37a\_  
d1afra\_ d1oquc\_ d1syys\_ d1mtyd\_ d2o1za\_ d1uzra\_ d1smsa\_ d2fkza\_  
d1zujal d1s3qa1 d2fjca1 d1z6om1 d1veia\_ d4dyya\_ d1jiga\_ d3gvya\_  
d2pyba\_ d4cy9a1 d3bvfa1 d1r03a\_ d2cf7a\_ d1nf4a\_ d1zs3a1 d4iwka\_  
d3ka8a\_ d3np0x\_ d1n1qa\_ d1lb3a\_ d4e6ka\_ d1z6oa1 d2fzfa1 d4dyua\_  
d3ge4a\_ d1jgca\_ d4am4a\_ d2z6ma\_ d1ji5a\_ d1vlga\_ d1lkoa1 d1krqa\_  
d3qz3a\_ d1o9ra\_ d2ffxj\_ d1euma\_ d1yv1a1 d2v2pa\_ d1j30a\_ d4di0a\_  
d1dpsa\_ d1oewa\_ d2qzxa\_ d2asia\_ d1psoe\_ d1smra\_ d2h6ta\_ d1pfza\_  
d1lizda\_ d3hd8a\_ d1j71a\_ d1dpja\_ d4aa9a\_ d1t6ex\_ g1b5f.1 g1lya.1  
g1htr.1 d1qdma2 d1bxoa\_ d1wkra\_ d1tzsa\_ d1libqa\_ d2qzwa\_ d1bdqa\_  
d3ggta\_ d3ixoa\_ d1mrxa\_ d2haha\_ d1tw7a\_ d4njsa\_ d1sgua\_ d2p3da\_  
d1nsoa\_ d3d3ta\_ d2rkfa\_ d1c6ya\_ d2rspa\_ d3ogpa\_ d3ekwa\_ d2o4na\_  
d2j9ja\_ d1baia\_ d3ggua\_ d3lzua\_ d4npua\_ d4j55a\_ d2r8na\_ d2fxda\_  
d2p3ca\_ d4dqea\_ d3ttpa\_ d3t3ca\_ d2p3aa\_ d2hc0a\_ d2fdca\_ d3mwsa\_  
d1k8rb\_ d1wgra1 d1ef5a\_ d1wfyal d1e8ya3 d1wgya1 d1lfda\_ d2cs4a1  
d1wxma1 d2byea1 d3kh0a1 d2byfa1 d1wxaa1 d1e7ua3 d1wgda1 d1wggal  
d4q5eb\_ d1wjna1 d1se9a\_ d3n3kb\_ d1wz0a1 d1we6a1 d2m0xa\_ d2gbka\_  
d3rt3b1 d1wh3a1 d1sifa\_ d2ekek2 d4ii2b1 d4hk2a1 d1c3ta\_ d1m94a\_  
d1wgha1 d1ttna1 d1j8ca\_ d1wx8a1 d3v6cb1 d2ma9b\_ d4i6lb1 d2jvca1  
d1iyfa\_ d2k1fa\_ d1wxva1 d1wf9a1 d1t0ya\_ d2io0b2 d1x1ma1 d2gbma\_  
d1zw7a1 d2m17a\_ d1ud7a\_ d1we7a1 d2lwp\_ d2gbja\_ d1wjua1 d1v6ea1  
d1v86a1 d4eewa\_ d1wiaa1 d4icva\_ d4gu2a\_ d1wx7a1 d1wy8a1 d4hka1  
d2fazal d1v5oa1 d2a13a1 d2cr5a1 d1wj4a1 d1wgqa1 d1v89a1 d2coda1  
d1zc3b\_ d1wg7a1 d1u5ea1 d1v61a1 d2coca1 d2ys1a1 d1v5pa1 d1ntya2  
d1wjma1 d1wi1a1 d1u29a\_ d1xx0a1 d1unqa\_ d2zkmx3 d1fhoa\_ d1v88a1  
d2adza1 d1x1fa1 d1p6sa\_ d2coaa1 d1btka\_ d1v5ma1 d1faoa\_ d2x18a\_  
d1dyna\_ d1x1ga1 d4kaxb\_ d2j59m1 d1xcga2 d1txda2 d1u5da1 d1dbha2  
d1wlha\_ d1upqa\_ d1v5ua1 d1foea2 d2fjla1 d1eaza\_ d2dfka2 d2cofa1  
d1kz7a2 d2dara2 d2dara1 d1wyha2 d2dloa2 d1rutx4 d1rutx3 d2cuqa2  
d1x41a2 d1x41a1 d1x3ha2 d1x3ha1 d2d8za1 d1x61a2 d1x6aa1 d1x6aa2  
d2cora2 d2cora1 d1v6ga1 d1v6ga2 d2d8za2 d1x64a1 d1x64a2 d1b8ta1  
d2co8a1 d1x63a2 d2dj7a2 d2dj7a1 d2cu8a2 d2cu8a1 d1g47a2 d1g47a1  
d1j2oa1 d1wyha1 d2dloa1 d1wiga1 d1wiga2 d2cupa2 d2cupa3 d1x68a1  
d2d8ya2 d2d8ya1 d1m3va2 d1x62a1 d1x68a2 d1x61a1 d1b8ta3 d1b8ta2  
d2d8xa2 d2d8xa1 d1x4ka1 d1x4ka2 d2cuqa1 d2co8a2 d1j2oa2 d1x63a1  
d2cura1 d2cura2 d1x62a2 d2bcgg1 d2bcgg2 d1d5ta1 d1dszb\_ d1a6ya\_

d3cbba\_ d1ynwa1 d1r4ia\_ d1hcqa\_ d2hana\_ d2hanb\_ d2enva1 d1kb4b\_  
d2nllb\_ d1lola\_ d1cita\_ d1lum8a\_ d1lixza\_ d1qvra2 d1qvra3 d1qzma\_  
d1sxjc2 d1jr3d2 d2p65a\_ d1g8pa\_ d3hu3a3 d1sxjd2 d1njfa\_ d1in4a2  
d1sxja2 d1tuea1 d2ce7a2 d1w5sa2 d1sxjb2 d1d2na\_ d1ny5a2 d1ofha\_  
d2gnoa2 d2a5yb3 d1fnaa2 d1u0ja1 d1lv7a\_ d1iqpa2 d2fnaa2 d1ixsb2  
d4gita\_ d1sxje2 d1g41a\_ d1svpa\_ d1mbma\_ d3su6a1 d1cu1a1 d4agka\_  
d1vcpa\_ d1q31a\_ g1n11.1 d3e90b\_ d1ep5a\_ d3u1jb\_ d2k4ua\_ d1hp2a\_  
d2lu9a\_ d1baha\_ d2meoa1 d1wm7a\_ d1hllya\_ d1n8ma\_ d1jlza\_ d1wpda\_  
d1c55a\_ d1pvza\_ d1wt7a\_ d1wz5a\_ d1m2sa\_ d1pjva\_ d1c49a\_ d1qkya\_  
d2ktca1 d1wmta\_ d1du9a\_ d1j5ja\_ d1rlga\_ d1c4qa\_ d2wv6d\_ d1prtf\_  
d1ltrd\_ d4l63b1 d1r4pb\_ d1prtd\_ d1tl0f\_ d2bosa\_ d1prtb1 d3chbd\_  
d1t0za\_ d2i61a\_ d1t1ta\_ d1sn4a\_ d1kv0a\_ d2lkba\_ d1npia\_ d1wwna\_  
d1pe4a\_ d2kbka\_ d2li7a\_ d1djta\_ d2kbha\_ d1dq7a\_ d1sega\_ d1omya\_  
d1zywa1 d1jzaa\_ d2jca\_ d1bnla\_ d1bvsa3 d1lixra2 d1iyjb4 d1iyjb5  
d1iyjb3 d1o7ia\_ d4ipca1 d1x3ea\_ d4apva\_ d1jb7a2 d1jb7a3 d3kdfa\_  
d1uelb\_ d1wjja1 d3eiva\_ d1xjva2 d1xjva1 d2ccza2 d1se8a\_ d1lloc\_  
d1jb7b\_ d1qvca\_ d3ulla\_ d1qzga\_ d1miua4 d1miua5 d1miua3 d3g48a1  
d1gd7a\_ d1jjcb3 d1pyba\_ d3ubub\_ dlegia\_ d1v7pa\_ d1tdqb\_ d3ubua\_  
d1c3ab\_ d1h8ua\_ d3bx4b\_ d1t8ca1 d1sb2a1 d1qdda\_ d2ziba1 d3cada\_  
d1byfa\_ d1j34b\_ d1jwia\_ d1jzna\_ d1c3aa\_ d1oz7b\_ d1wmza\_ d3bdwb\_  
d1hq8a\_ d1fifa1 d1dv8a\_ d3hupa\_ d1wk1a1 d1umra\_ d2afpa\_ d3bx4a\_  
d1gz2a\_ d1sl6a\_ d1v7pb\_ d3g8ka\_ d1ixxa\_ d1j34a\_ d1jwib\_ d1g1sa1  
d1y17a1 d1ja3a\_ d1fvub\_ d3bdwa\_ d1sb2b1 d1fvua\_ d1umrc\_ d1oz7a\_  
d4m17a\_ d3cfwa1 d1ypqa1 d1g1ta1 d3fd4a\_ d3l9jc\_ d4dn8a1 d1v41b\_  
d1rdl1\_ d2msba\_ d1prtb2 d1pfsa\_ d2a1ka\_ d1rpma\_ d2shpa1 d1yfoa\_  
d1l8ka\_ d2ooqa1 d1g4us2 d1p15a\_ d1lara1 d1wcha\_ d2fh7a2 d2fh7a1  
d1ohea1 d1ohea2 d2f4da\_ d1rxda\_ d2hxpa\_ d1xria\_ d1d5ra2 d1fpza\_  
d3ezza\_ d4y2ea\_ d3ubra\_ d1qo8a1 d1d4ca1 d2k3va\_ d1ft5a\_ d1qdba\_  
d1m1qa\_ d2j7aa\_ d1h21a\_ d1ogyb\_ d4fasa\_ d1oaha\_ d1sp3a\_ d3h33a\_  
d1rwja\_ d19hca\_ d1os6a\_ d3bxua\_ d3h4na\_ d1i77a\_ d3caoa\_ d1j0pa\_  
d2ctha\_ d1duwa\_ d1ofwa\_ d2e84a\_ d1hh5a\_ d3h34a\_ d1wioa4 d1ccza2  
d1vcaa1 d1dr9a2 d2d9qb1 d2nxyb2 d1adqa1 d1fnga1 d1uvqb1 d1zs8a1  
d2vola1 d2vola2 d1mfb12 d2jelh2 d1uwel2 d3qq4b1 d1kjvb\_ d1k5na1  
d1osph2 d4odh12 d1ow0a1 d1ow0a2 d1bfob2 d3l9ra2 d3jtth1 d2fath2  
d4elkb2 d1fn4b2 d2xfxb\_ d1pg7x2 d1cqka\_ d4k71b2 d1lk2a1 d1eapb2  
d4lfhg2 d1i4fa1 d2nw2a2 d1kfah2 d1mhca1 d1h3ua1 d1wejh2 d1h0db2  
d1a5fh2 d1kcvh2 d1mjuh2 d1qqda1 d1kcrh2 d1k8ia1 d3huja2 d2nnab1  
d1nfd2 d3mffb2 d1s9va1 d1lk3h2 d1q0xl2 d1fv1b1 d1neza1 d4rfeb2  
d1r3ha1 d1a6tb2 d1kjva1 d1pz5b2 d1onqa1 d2bc4a2 d1de4a1 d1k8da1  
d1tcra2 d1dn0b2 d1nfde2 d2xwtb2 d1bfoa2 d1mexh2 d1iakb1 d1ypzf2  
d4f7ea2 d1q72l2 d2fbjh2 d1fe8h2 d1clzh2 d1fngb1 d1uvqa1 d1vgka1  
d1c16a1 d4j12a2 d4x99b2 d1igtb3 d1je6a1 d1q72h2 d1nldh2 d1teth2  
d2hmic2 d1i1ca2 d1i1ca1 d1k8ib1 d1q0yh2 d1kfa12 d3frua1 d1pg7w2  
d1u58a1 d1igyb4 d1igyb3 d1hyrc1 d1klub1 d1deeb2 d1c12b2 d2bc4b2

d2ig2h2 d1kcvl2 d3wn5b1 d1lk2b\_ d1lk3l2 d1mjul2 d1sm3h2 d1q0xh2  
d1zvsal d1ydpal d1u8ib2 d1ypze2 d1kcuh2 d1lop9a\_ d1y0la1 d1letzb1  
d1legj11 d2gsib1 d1nj9a1 d4jfhd1 d1aqk11 d1t2ja\_ d1lo4h1 d1zvyal  
d3v4v11 d4enec1 d1kxtb\_ d5e8ea1 d2pxya\_ d4weud\_ d1xiwc\_ d2esvd1  
d1qznh\_ d1ogae1 d1f4xh1 d4n1hb\_ d3ezjb1 d3mlw11 d1kfah1 d1letza1  
d1b4jh1 d3cfic\_ d4w68a\_ d2arja1 d1ek3a\_ d2ok011 d1vera\_ d1uwgh1  
d1blnb1 d1fpth1 d1rzga1 d2giya1 d4m3kb1 d1nc2a1 d2nyyd1 d1ncna\_  
d1fbih1 d5dxwa\_ d4fqqa1 d1dqdh1 d1jfq11 d1kelh1 d1faih1 d1frgl1  
d1figl1 d4m6n11 d1fo0a\_ d4hxb11 d3b5ga\_ d3quyd1 d2h9gb1 d1i8kb\_  
d2dd8h1 d2ck0h1 d1eaja\_ d4w6wb1 d2a6ib3 d1t66d1 d2e27h\_ d1ob1b1  
d1f11b1 d2v7na1 d1ad0a1 d2xt1b1 d1pskh1 d4i13b1 d2op411 d1a0q11  
d1uwell d1za3a1 d1ncb11 d4uu9a\_ d1bm3h1 d1cloh1 d1nqba2 d1cf8h1  
d4y5va\_ d1mhph1 d5anma1 d4cdgc1 d4ldeb\_ d1y0lb1 d2pcpb1 d1z3gl1  
d1dfb11 d1fh5h1 d3g5xa1 d1tzib1 d4dn311 d3zhka1 d2b1hh1 d2uyla1  
d1f3dh1 d1nj9b1 d2agjh1 d2h1p11 d1q72h1 d8fabb1 d1ndmb1 d1rjca1  
d4u6hb1 d3upca\_ d2fbj11 d1osph1 d1tvda\_ d2cjvh\_ d4fhbd1 d1bd2d1  
d1rz7h1 d3nn8a\_ d1knoa1 d1nfda1 d2bmkb1 d1dq11\_ d1igyb1 d1lign11  
d12e8h1 d3utzal d1nc2b1 d1rihh1 d4mwfb1 d4jvpa1 d1mieh1 d1rhfa1  
d1fgn11 d1sbsh1 d1lp9e1 d1dn0a1 d4lqf11 d1iaih1 d1kgcd1 d1mh5b1  
d1gpol1 d2g60h3 d1f8t11 d2jixd1 d4grwh\_ d1fo0b\_ d1bfob1 d1axsa1  
d1u9ka\_ d1nmbh\_ d1h8na1 d1h8na2 d1jguh1 d4eura1 d3sdy11 d35c8h1  
d1w7211 d1mvub\_ d1i9rh1 d1ob1a1 d4wenb\_ d1yeeh1 d3ietc1 d1f58h1  
d1ad0b1 d1mqk1\_ d1nbvh1 d4b50a\_ d3r8bb\_ d1baf11 d1mamh1 d4rgne1  
d2gsgb\_ d35c811 d1bafh1 d1aih1 d2pcpa1 d2fath1 d2x1pa\_ d1orsb1  
d1ibgl1 d1shma\_ d1a2yb\_ d1u0qa\_ d2coqa\_ d1hilb1 d1qfwi\_ d1jv5b\_  
d1fn4b1 d5e0qa\_ d1nsnh1 d1plgl1 d4ocx11 d1kb5h1 d1rzfh1 d1pg7x1  
d2fx7h1 d2oi9c\_ d1l7i11 d3eyva1 d1d5i11 d4ffyl\_ d1tet11 d1a6wh\_  
d1ac6a\_ d3dvfa\_ d1nfde1 d1mimh1 d1ri8a1 d1jhlh\_ d3dura\_ d1fskb1  
d1f97a1 d3so3b1 d2ak4d1 d1lp9f1 d4z7wf1 d1l7th1 d4y5ya\_ d4x7ec1  
d1emth1 d1ikfl1 d1nlbh1 d4uta11 d1bjma1 d1eapb1 d1u6ah1 d2dtgd1  
d1kj2b\_ d1xeda1 d1cleh1 d1fgvh\_ d2bnub1 d2fb4h1 d2dtgb1 d1ktrh\_  
d1jpth1 d1qkz11 d4hepg\_ d2atpb1 d1flrh1 d2hrp11 d1mvfa\_ d1iaim1  
d3k80a1 d2jb5h1 d3zkxc\_ d4grwe\_ d1it9h1 d1rhhb1 d3w9ec\_ d1e4wh1  
d1sy6h1 d2j6eh1 d3qxta\_ d1jglh1 d1p7ka1 d1tzhb1 d4n8pa1 d1gaf11  
d2jelh1 d1wioa2 d4i0cc1 d1cicb1 d1lmka2 d1lmka1 d1iqwh1 d1lorqb1  
d1ejoh1 d1jnlh1 d4zg1a\_ d43c9b\_ d1ggbl1 d1wejh1 d3q6fa1 d1f3dj1  
d3c6la1 d1bqlh1 d3p9wb\_ d1a3r11 d1h0db1 d2uzil\_ d1eo811 d1qfwl\_  
d1n7m11 d1ligja1 d1c5ch1 d2a9mh\_ d1rmfh1 d1fj1b1 d4heme\_ d1ccza1  
d1a5fh1 d1ogad1 d1dlfh\_ d1qa9b\_ d1vgel1 d3qskb\_ d1sjxa\_ d4ozfg1  
d1sq2n\_ d1qd0a\_ d1kcvh1 d1c5db1 d3qcu11 d8faba1 d3bn9d1 d1mjuh1  
d4y8dc\_ d7fabh1 d3dvgb1 d1lo011 d1a6tb1 d1gigh1 d1kcrh1 d2hwz11  
d1yjdc1 d3clfl1 d4krna\_ d1dl7l\_ d1e6ol1 d1mexh1 d3r0ma\_ d4kkna\_  
d1fns11 d1oaqh\_ d1rzia1 d1lucb1 d1ncw11 d4b41a\_ d1nfd11 d2mpah1  
d2d7t11 d4grwf\_ d4b5ea\_ d1lk3h1 d3u79a\_ d4u3xa\_ d1ghfl1 d1bvkb\_



d1mcww1 d1b88a\_ d1jrhh1 d32c2b1 d4wemb\_ d1dsfh\_ d1op3h1 d1cell1  
d1iqda1 d1qoka1 d1qoka2 d1qfuh1 d2crya1 d1ay1h1 d1oaql\_ d3ab0b\_  
d1rur11 d1t4kb1 d1bz7b1 d1n0xh1 d1for11 d1ucb11 d4w6yb\_ d43c9a\_  
d2aabl1 d1tzia1 d4n1ca\_ d1k6qh1 d3g9ab\_ d4tvsa1 d1ligmh\_ d1pz5b1  
d3dx9a1 d3wxwh\_ d1nakh1 d1kcul1 d3eaka\_ d4qlra1 d1cr9l1 d1d9ka\_  
d1f4x11 d1deea1 d2i27n2 d1c12a1 d2orb11 d1j8hd1 d1mcph1 d1c5da1  
d1kenh1 d1bd2e1 d1h5ba\_ d4x7fc1 d3upaa\_ d1t3fa1 d1indh1 d2dtgc1  
d4hc111 d1zv5a1 d4wgvb\_ d1uwgl1 d4f37k1 d1aqkh1 d1vesa\_ d3zkqd\_  
d1fpt11 d1lo4l1 d1knob1 d3rrqa\_ d1ct8b1 d4orz\_ d1mlbb1 d4hgkc1  
d1dqdl1 d1bogb1 d4ozhe1 d1dr9a1 d1i7za1 d1dn0b1 d1kell1 d1rzib1  
d1ypzf1 d1wtla\_ d1hkfa\_ d1fail1 d1figh1 d2vyre\_ d1sjva\_ d1ohqa\_  
d1bfoa1 d1pkqb1 d1mjul1 d1b4j11 d1nsn11 d2arjb1 d1p4bh\_ d4aj0a\_  
d3nn8b\_ d2rcja1 d1f2xk\_ d4v1dd\_ d1adqh1 d2eksa\_ d4k3ga\_ d1jfqh1  
d1uweh1 d1frgh1 d4gftb\_ d1uz8b1 d4n1ea\_ d1bm3l1 d1clo11 d3mcka1  
d2vq1a1 d1ae6h1 d4aq1b1 d1uj3b1 d1nbqa1 d1fh5l1 d2ck0l1 d2ywza\_  
d1q72l1 d4nbxb\_ d1hila1 d4hz1b1 d2j88l1 d1zmya1 d1cd0a\_ d1a4ka1  
d1psk11 d1a0qh1 d4krmb\_ d1ncbh1 d2fbjh1 d1j8he1 d1i3ua\_ d1cf8l1  
d1fe8h1 d2p1ya1 d1eeqa\_ d2x89a\_ d1ol0a\_ d2r0lh1 d1ub5a1 d1dfbh1  
d3eyvb1 d4jdvb1 d4p2cg\_ d2gsia1 d2agj11 d1u3ha1 d2h1ph1 d1rih11  
d1fskc1 d1boga1 d2a77l1 d1osp11 d1qfoa\_ d3dwta\_ d2fx7l1 d1rz7l1  
d3stba1 d1pkqa1 d1b6da1 d1dzba2 d1dzba1 d1kj2a\_ d4l1ha\_ d1rzgb1  
d1dq1h\_ d1e8l1 d1miel1 d1jmaa\_ d1sbs11 d1fgnh1 d1f58l1 d1mqkh\_  
d1ndgb1 d3qegl1 d1iail1 d2aw2a1 d1tqbc1 d3fo2a1 d4dkaa\_ d1f8th1  
d2g60l1 d2ywya\_ d1uj3a1 d1yc7a\_ d3bd3a\_ d4w6xb1 d1nmb1\_ d1i8ka\_  
d1rjlb1 d1ypze1 d1p7kb1 d1kxqe\_ d1gpoh1 d2z4qa1 d1w72h1 d1i9rl1  
d4qgya1 d4xt1c\_ d2qqnh1 d1cica1 d3c08h1 d2cd0a\_ d2bdnh1 d1hnga1  
d1mam11 d1nldh1 d1cr9h1 d4lcih1 d3bkyh1 d3qg7l1 d1ai111 d1kxvc\_  
d4iosd\_ d1l7ih1 d2x1qa\_ d1ub6b1 d3k74b\_ d1libgh1 d1teth1 d1igya1  
d1hxma1 d2x6ma\_ d2e71a\_ d5e03a\_ d1qfwm\_ d2r0kh1 d1igjb1 d1rurh1  
d1plgh1 d1mj8h1 d1yuhb1 d3fmg11 d1rzf11 d1emtl1 d1ad9b1 d1igtb1  
d1n1bl1 d1d5ih1 d3k7ua\_ d4ffyh\_ d1bwwa\_ d3dvga1 d1a6ta1 d1fgvl\_  
d4qxgl1 d1mim11 d1jh11\_ d2hffb1 d2hh0l1 d1qkzh1 d1l7t11 d1afvh1  
d1iaii1 d2cjuh\_ d1um5h1 d2ghwb2 d2ghwb1 d1kgce1 d2fgwh1 d1ikfh1  
d1dvfd\_ d2i24n1 d2xtjb\_ d1za3b1 d2ycla\_ d2hh0h1 d2x1oa\_ d1bvka\_  
d1rjla1 d5e7ba1 d1igta1 d1il1b1 d2fb4l1 d1mvua\_ d1jpt11 d32c2a1  
d1fvca\_ d1iqdb1 d2hrph1 d2p4ab\_ d4qola\_ d1p2cb1 d1wt5c\_ d1t4ka1  
d5c1mb\_ d1it9l1 d1bz7a1 d1b2wh1 d1e4w11 d1jnl11 d1yedb1 d1za6b1  
d3u7aa\_ d1igfh1 d3gnm11 d1orsa1 d1wejl1 d1a2ya\_ d1hxmb1 d1gafh1  
d2j4wh1 d1pz5a1 d1j05a\_ d1a3rh1 d4fq1l1 d1qfwh\_ d1eo8h1 d1n7mh1  
d4s11a\_ d1kegh1 d5da4a\_ d1iqwl1 d3whxb1 d1vgeh1 d1deeb1 d1c12b1  
d1t2ql1 d1ad9a1 d3gsnb1 d3b2uc1 d1ggbh1 d1t3fb1 d1nak11 d4ocmc\_  
d1lila1 d2v7hb3 d2esve1 d1mcoh1 d2qr0b1 d2q3aa\_ d1ct8a1 d1kcr11  
d2pxyb\_ d2uzih\_ d5c3ld\_ d3durb\_ d1c5c11 d2ak4e1 d1d17h\_ d1xiwd\_  
d1mlba1 d1rmfl1 d1i7zb1 d1dlfl\_ d2xa3a\_ d5bq7b1 d1dqqb1 d3h42l1

d1egjh1 d1kcvl1 d1fe8l1 d2j6e11 d1f3rb2 d1lk3l1 d1sm3h1 d1q0xh1  
d1ghfh1 d7fabl1 d1igch1 d1lo0h1 d4idla\_ d5c2bl\_ d1jrh11 d1l1la1  
d3zhda1 d4kfcz\_ d1b0wa\_ d1e6oh1 d1mexl1 d4krpb\_ d1fnsh1 d1ncwh1  
d4hgma\_ d4eigb1 d4rzca\_ d2mpa11 d4y5xa\_ d5en2b1 d3lrga1 d4ej1c1  
d1rhha1 d1j05b\_ d1forh1 d1q9wb1 d2wzpd\_ d2aq2a1 d1h0da1 d3revb1  
d2ij0c1 d1tzha1 d4m7j11 d1k6q11 d3b9kc1 d1igml\_ d3qeua1 d1dsfl\_  
d1ce1h1 d1kcu11 d1zvha1 d1zvoa1 d1tqbb1 d1ay111 d2qsc11 d2cgrh1  
d1n10h1 d1ken11 d3eo0a1 d4n9ob1 d1n0x11 d3k1kc\_ d1d4ua2 d2aq2b1  
d1enfa1 d1i4pa1 d1v1oa1 d1et9a1 d1esfa1 d2g9hd1 d4ohja1 d1klud1  
d1bxta1 d1eu3a1 d1ty0a1 d1fnua1 d2cqva1 d1fhga\_ d2klma\_ d2d12a1  
d1biha3 d1biha1 d1biha4 d3qp3a1 d1g1ca\_ d1gxea\_ d1cvsc2 d1cvsc1  
d1xmwa2 d1m4ka2 d2otpa2 d1biha2 d1rhfa2 d2fcba2 d2fcba1 d1wwbx\_  
d1gsma2 d1epfa1 d1epfa2 d2dava1 d1waaa\_ d1f97a2 d1x44a1 d1vcaa2  
d1fnla2 d1fnla1 d3b5ha2 d3h8na2 d3h8na1 d1jbja1 d1jbja2 d1pd6a\_  
d1f2qa2 d1f2qa1 d3cx2a\_ d1nbqa2 d3b5ha1 d1n26a1 d1xiwb\_ d1xaua\_  
d1fltx\_ d2ifga1 d1olla1 d1olla2 d1cs6a4 d1cs6a3 d1cs6a2 d1cs6a1  
d2gw5a2 d1sy6a1 d1xiwa\_ d1lucta2 d1lucta1 d1ry7b2 d1gl4b\_ d1qz1a3  
d1olza1 d2c9aa1 d1wwca\_

**Family-29 (b.40.2.1)**

**Positive dataset contains 3 protein sequences.**

d2wv6d\_ d4l63b1 d1t10f\_

**Negative dataset contains 4102 protein sequences.**

d1libja\_ d1c7na\_ d1iuga\_ d4q75a\_ d2bkwa1 d1t3ia\_ d1n8pa\_ d1qz9a\_  
d1j9a\_ d1eg5a\_ d1p3wa\_ d3kgwa\_ d1c11a\_ d2ctza1 d1vjoa\_ d2rfva\_  
d1gc0a\_ d1cs1a\_ d1d2fa\_ d2ch1a1 d1qgna\_ d1pffa\_ d1elua\_ d1u08a\_  
d1lc5a\_ d1b5pa\_ d2ay1a\_ d1bw0a\_ d3pd6a\_ d7aata\_ d2csta\_ d1j32a\_  
d1fg7a\_ d4wlha\_ d1o4sa\_ d1v2da\_ d1gdea\_ d1m6sa\_ d1v72a1 d1svva\_  
d1wsta1 d2f8ja2 d1lk9a\_ d1vp4a1 d1xi9a1 d2gb3a1 d1yaaa\_ d1sefa\_  
d1sfna\_ d1rc6a\_ d1qnia1 d1fwa1 d1f56a\_ d1bypa\_ d1azca\_ d1ws8a\_  
d3u25a\_ d1cuoa\_ d1id2a\_ d1rkra\_ d2iaac\_ d4dp1x\_ d1nwpa\_ d2gima\_  
d2i7sa\_ d1qhqa\_ d3ehbb1 d1fftb1 d1gyca3 d1hfua2 d1kbva1 d1kbva2  
d1sdda1 d1sdda2 d1gyca1 d1mzya1 d2bw4a1 d1aoza1 d1aoza3 d1aoza2  
d1kyaa2 d1kyaa3 d1kyaa1 d1mzya2 d4e9sa1 d1sddb1 d1sddb2 d1hfua1  
d1hfua3 d1oe1a2 d1oe1a1 d1v10a2 d1v10a3 d1v10a1 d1s5ja2 d1qhta2  
d4dlea2 d1tgoa2 d3py8a2 d1q8ia2 d1kfsa2 d2py5a2 d1d5aa2 d2cfba1  
d1dfoa\_ d1o69a\_ d1bj4a\_ d3k28a\_ d2bwpa\_ d3lg0a\_ d2fnua\_ d3ou5a\_  
d1z7da1 d1b9ha\_ d1iaya\_ d4msoa\_ d1bs0a\_ d1s0aa\_ d1sffa\_ d3tqxa\_  
d1mdoa\_ d3qboa\_ d3pgya\_ d1bjna\_ d2dkja\_ d1ejia\_ d1vefa1 d4wxga\_  
d3bs8a\_ d3gbxa1 d1w23a\_ d1a3qa1 d1iknc\_ d3brda1 d1oy3c\_ d1imhc1  
d1gjia1 d1zk9a1 d2cxka1 d2bema\_ d1pama1 d1ea9c1 d1qhoa1 d2fhfa2  
d2fhfa1 d1k3ia1 d1j0ha1 d1cxl1a1 d2bhua1 d1edqa1 d1f1sa2 d1ut9a2  
d1gvia1 d1txka1 d1zx5a1 d2ph1a2 d2ph1a1 d1fxza2 d1fxza1 d1lrha\_  
d1uija1 g1dgw.1 d2v09a\_ d1uika2 d1uika1 d1dgwa\_ d1ep0a\_ d2pa7a1  
d1wlta1 d2c0za1 d1zbf1a1 d2z1ha\_ d2etja1 d3qioa1 d1j11a\_ d2e41a\_

d1jl2a\_ d2lsna1 d1lio2a\_ d1luaxa\_ d2yv0x\_ d1mu2a1 d1lekea\_ d1ds6b\_  
d1fstb\_ d1g0da1 d2b5ea2 d2b5ea3 d2b5ea1 d2b5ea4 d2kp1a1 d2kp2a1  
d1hyua3 d1hyua4 d1j08a1 d1j08a2 d2bjca1 d2hsga1 d1qpza1 d1efaa1  
d1k9ua\_ d2opoa\_ d1e3oc2 d1lic8a2 d2ovga\_ d1sq8a\_ d1rzsa\_ d3kz3a\_  
d3orca\_ d3gpdg2 d2q49a2 d1hdgo2 d2g17a2 d2cvoa2 d2czca1 d3pwka2  
d1obfo2 d1i32a2 d1zyao2 d2pkqo2 d1b7go2 d2hjsa2 d1cf2o2 d1vkna2  
d4lt9a1 d3tc7a1 d3hoja\_ d1i4na\_ d3vnda\_ d3nl8a1 d1gega\_ d3naval  
d1v5xa\_ d4a2ra1 d3tc6a1 d1ujpa\_ d4ijba\_ d1xcfa\_ d1vc4a\_ d1rd5a\_  
d1qopa\_ d3b5va\_ d2msya\_ d2djoa1 d2r5za\_ d1au7a1 d1f43a\_ d2lmda1  
d1akhb\_ d1s7ea1 d3nara\_ d1zq3p1 d2craa1 d1mija\_ d4uuta\_ d3a01a\_  
d1x58a1 d3rkqa1 d3cmya1 d2cqa1 d2da6a1 d1e3oc1 d1fjla\_ d1mh3a1  
d1ig7a\_ d1x41a1 d1wh7a1 d1gt0c1 d2mw8a\_ d1lfup\_ d1x2ma1 d1b72a\_  
d1wi3a1 d1jgga\_ d1wjha1 d1x2na1 d1mnmc\_ d2cuea1 d3k2aa\_ d2hosa\_  
d2jwta2 d1pufa\_ d1octl1 d2hi3a\_ d1b8ia\_ d4j19a\_ d3lnqa\_ d1wh5a1  
d1b8ib\_ d1fexa\_ d2cqra1 d1guua\_ d1ug2a1 d2cqa1 d2ajea1 d4a69c\_  
d1h8ac1 d2crga1 d2iw5b1 d1xc5a1 d2cu7a1 d1wgxa1 d2cjja1 d2ckxa1  
d1gvda\_ d1tc3c\_ d1gdtal d1u78a2 d1igna2 d2iu5a1 d1zk8a1 d2g7sa1  
d2fd5a1 d2np5a1 d1z0xa1 d2id6a1 d2d6ya1 d2i10a1 d2oi8a1 d3c07a1  
d2ns7a1 d2fq4a1 d2yvea1 d1t33a1 d2o7ta1 d1rkta1 d2np3b1 d2g7ga1  
d2gena1 d2fbqa1 d2g7la1 d2gfna1 d2g3ba1 d2jj7a1 d2hyja1 d1sgma1  
d1ui5a1 d2hkua1 d2id3a1 d4jyka1 d1b10a1 d1d5ya1 d1d5ya2 d3ubub\_  
d1legia\_ d1qo3c\_ d1v7pa\_ d1tdqb\_ d3ubua\_ d1c3ab\_ d1h8ua\_ d3bx4b\_  
d1t8ca1 d1sb2a1 d1qdda\_ d2ziba1 d3cada\_ d1byfa\_ d1j34b\_ d1jwia\_  
d1jzna\_ d1c3aa\_ d1oz7b\_ d1wmza\_ d3bdwb\_ d1hq8a\_ d1dv8a\_ d3hupa\_  
d1wk1a1 d1umra\_ d2afpa\_ d3bx4a\_ d1gz2a\_ d1sl6a\_ d1v7pb\_ d3g8ka\_  
d1ixxa\_ d1j34a\_ d1jwib\_ d1g1sa1 d1y17a1 d1ja3a\_ d1fvub\_ d3bdwa\_  
d1sb2b1 d1fvua\_ d1umrc\_ d1oz7a\_ d4m17a\_ d3cfwa1 d1ypqa1 d1g1ta1  
d3fd4a\_ d3l9jc\_ d4dn8a1 d1v4lb\_ d1rdl1\_ d2msba\_ d3lv8a\_ d1s3ga1  
d1zaka1 d1s4qa\_ d3tvta2 d1uf9a\_ d1khta\_ d1ckea\_ d1osna\_ d1p5zb\_  
d4tmka\_ d3cm0a\_ d1tmka\_ d1jaga\_ d3h86a\_ d1t0hb\_ d1nn5a\_ d2h92a\_  
d3kb2a1 d2c95a1 d1yj5a2 d1kgda\_ d1ly1a\_ d2ak3a1 d1vyva2 d1deka\_  
d2grja1 d1p3ja1 d1y63a\_ d1e4ya1 d1s96a\_ d3iija1 d1lvga\_ d1nksa\_  
d1vyua2 d4e22a\_ d1qf9a\_ d1jjva\_ d1q3ta\_ d1ki9a\_ d1lw7a2 d1teva\_  
d1kjwa2 d1gsia\_ d1j99a\_ d1t8ta1 d1nsta\_ d1fmja\_ d1zrha\_ d1ls6a\_  
d2a3ra\_ d1aqua\_ d2zptx\_ d3ckla\_ d1texas\_ d1q44a\_ d2gwha\_ d1odfa\_  
d1uj2a\_ d4gi7a\_ d2jeoa1 d1rz3a\_ d1z0ja1 d3umra2 d3gj0a1 d2gaoa1  
d1yzga1 d1x3sa1 d1g7sa4 d1puja\_ d1udxa2 d1kk1a3 d2o52a\_ d1jwyb\_  
d1zca2 d1zcb2 d2fv8a1 d2cjwa\_ d3dz8a1 d1xzpa2 d1vg8a\_ d4qxaa\_  
d2ew1a1 d1x1ra1 d2bcgy\_ d3doea1 d3cona\_ d3rega\_ d3wyga\_ d1upta\_  
d2b6ha1 d1zd9a1 d1r5ba3 d1n0ua2 d1r2qa\_ d2f9la1 d2rhda\_ d3q3jb\_  
d3q85a\_ d1efma1 d1r8qa\_ d2gf9a1 d2akab1 d1ek0a\_ d1z08a1 d2gcoa1  
d2dy1a2 d4g01b\_ d2cxa1 d1svia\_ d3q72a\_ d1ni3a1 d4ac9a4 d2erxa1  
d2bmea\_ d1wxqa1 d2gf0a1 d4ldja1 d1zunb3 d1d5ca\_ d4lv5b\_ d1efca3  
d1kmqa\_ d2g6ba1 d3lrpa\_ d1tada2 d2y8ea\_ d4rd4a1 d1z06a1 d2heia\_

d3a58b\_ d1u01a2 d1d2ea3 d1zj6a1 d2ocba\_ d3rwoa\_ d1mr3f\_ d2e9sa1  
d4u5xa1 d2iwra\_ d2fn4a1 d3bwdd\_ d2nzja1 d2atva1 d2ksqa\_ d3l43a\_  
d1mkya2 d1mkya1 d1wmsa\_ d1jnya3 d2rmka\_ d1f6ba\_ d1f60a3 d1gota2  
d1jala1 d2fh5b1 d1g16a\_ d2wblc\_ d1m7ba\_ d1wf3a1 d1f5na2 d1t9ha2  
d1z6xa1 d1z0aa1 d2fg5a1 d2a5ja1 d2bcjq2 d1s0ua3 d1ky3a\_ d4y0va\_  
d4lhwa\_ d2qmea1 d2atxa1 d1legaa1 d1ryha\_ d1moza\_ d1nrjb\_ d2erya1  
d3bfka\_ d1puia\_ d1fzqa\_ d3j3az1 d3t5ga\_ d1shza2 d3defa\_ d2f7sa1  
d3raba\_ d3tsoa\_ d3aq4a\_ d2a17a1 d3sfva1 d3bc1a\_ d2ncda\_ d1sdma\_  
d3h4sa1 d2heha\_ d2grya\_ g3kin.1 d1kk8a2 d1br2a2 d1goja\_ d1f9va\_  
d2mysa2 d1lkxa\_ d3t0qa\_ d4db1a1 d3gbja\_ d1ry6a\_ d1v8ka\_ d1kb0a1  
d1jmx2a d1jmx1a d1pbya1 d3vrda1 d3vrda2 d1fc2c d1fc1c d1h1oa2  
d1m70a2 d1m70a1 d1iqca2 d1iqca1 d1eb7a2 d1nmla2 d1nmla1 d1qksa1  
d1zc6a1 d1zbsa1 d1zbsa2 d1zc6a2 d2ch5a2 d2ch5a1 d1zxo2a d1zxo1a  
d1hroa\_ d4gedb\_ d3zooa\_ d1mz4a\_ d1gu2a\_ d1f1fa\_ d1dvva\_ d1c6ra\_  
d1c75a\_ d1e29a\_ d1gdva\_ d1cnoa\_ d1h32b\_ d1co6a\_ d2bh4x\_ d2aiua\_  
d5cytr\_ d1jdl1a\_ d1i8oa\_ d2zboa\_ d3dmia\_ d1ls9a\_ d1wvec\_ d2yk3a\_  
d3ph2b\_ d1dw0a\_ d5aura\_ d1q13a\_ d1qn2a\_ d1f1ca\_ d4zzva\_ d2xspa\_  
d1eg1a\_ d4v20a\_ d4ipma1 d1gpia\_ d4csia\_ d3pfza\_ d3ovwa\_ d2yoka\_  
d2a6za1 d3a4ua\_ d2a6va1 d1evsa\_ d1cnt1\_ d1pvhb\_ d1z7ca\_ d1huwa\_  
d1bgea\_ d1rhga\_ d1f6fa\_ d1f45b\_ d1i1rb\_ d1axia\_ d1etea\_ d3tgxb\_  
d1scfa\_ d2z3qa1 d3qb1a\_ d1m48a\_ d4nkqb\_ d1leera\_ d1v7mv\_ d5e4ea\_  
d2o27a\_ d3b5ka\_ d2psma1 d4zf7a\_ d3uf5a\_ d4x51a\_ d1d9ca\_ d4ypgc1  
d3oq3a\_ d1lqsl\_ d1n1fa\_ d1aula\_ d1wu3i\_ d3bes1\_ d3ux9a\_ d2b71a\_  
d3rbaa\_ d2qtra\_ d1nupa\_ d3l92a\_ d1f9aa\_ d1qjca\_ d2h29a\_ d1vlha\_  
d1od6a\_ d1lw7a1 d4ruka\_ d2el7a\_ d1iq0a2 d1irxa2 d1r6ta2 d1liva4  
d2cyba\_ d1rqga2 d1j09a2 d2yxna\_ d1f7ua2 d1h3fa1 d1ffya3 d2g36a1  
d1nzja\_ d1n31a\_ d1i61a\_ d1pfva2 d1h3na3 d3n9ia\_ d3sz3a1 d3sw2a\_  
d1moxc\_ d1edmb\_ d1aut12 d1aut11 d1nqlb\_ d1dva11 d1szba2 d1kigl\_  
d2y5fl\_ d1ijqa2 d1gk5a\_ d1g1sa2 d1nt0a3 d1xdtr\_ d1lmja2 d1lmja1  
d1nzia2 d2wphe\_ d1klil\_ d1pfx12 d1pfx11 d1p9ja\_ d1g1ta2 d1f7ea\_  
d4yzub\_ d1g14a2 d2y5ia\_ d1qlsa\_ d1psra\_ d3n22a\_ d2egda\_ d4ggfc\_  
d2wcea\_ d2luca\_ d4aqia\_ d3nsia\_ d2lp3a\_ d1a4pa\_ d1k8ua\_ d1nsha\_  
d1pvaa\_ d3fs7a\_ d2pvba\_ d1ttxa\_ d1rwy\_ d2kyfa\_ d1rk9a\_ d1lexra\_  
d1tiza1 d1nyaa\_ d1g8ia\_ d1ggwa\_ d1wdcc\_ d3fwba\_ d1ggza\_ d2o5ga\_  
d1ctaa\_ d1m45a\_ d3i5gc\_ d1sl8a\_ d1fpwa\_ d2scpa\_ d2roaa\_ d4aqra\_  
d3pn7b\_ d1br1b\_ d2mysb\_ d1s6ca\_ d1bjfa\_ d2obha\_ d1jfka\_ d1jf0a\_  
d1qv0a\_ d1lkja\_ d2mlfc\_ d2m97a\_ d2d8na\_ d4by5a\_ d1jbaa\_ d4nqga\_  
d1wdcb\_ d2mysc\_ d1j7qa\_ d1s6ia\_ d1uhka2 d1r2ua\_ d1dtla\_ d3kf9a\_  
d3pn7c\_ d1qjta\_ d1c07a\_ d1wkya2 d1uuqa\_ d3wh9a\_ d4m1ra\_ d1xyza\_  
d4xuya\_ d2je8a5 d4bf7a1 d3cuia\_ d1ur4a\_ d1qw9a2 d1odza\_ d2vzsa5  
d1bqca\_ d2x2ya1 d1hjqa\_ d1qnra\_ d4y7ea1 d1vjza\_ d4k68a\_ d2v3ga\_  
d4hpga\_ d1nofa2 d1nq6a\_ d1h4pa\_ d1aq0a\_ d3ziza\_ d4bs0a\_ d1lecea\_  
d1h1na\_ d1ta3b\_ d1w91a2 d1ilwa\_ d1uhva2 d1legza\_ d7a3ha\_ d1tvna1  
d3nyda1 d1ghsa\_ d2cyga1 d4xv0a\_ d2c8na2 d1w32a\_ d3emca\_ d1v6ya1

d1foba\_ d2uwfa1 d2fgla\_ d3niya1 d2c0ha1 d1rh9a1 d1yq2a5 d1szna2  
d1fa2a\_ d1pama4 d5do8a1 d1ea9c3 d2fhfa5 d1qhoa4 d1avaa2 d1m53a2  
d4m8ua1 d2gjpa2 d1lwha2 d4howa1 d1ktba2 d1j0ha3 d3vm5a1 d2x1ia\_  
d1wzaa2 d1uasa2 d2diea1 d1mxga2 d1ht6a2 d1eswa\_ d1liv8a2 d5cpsa\_  
d1ud2a2 d1zjaa1 d3gbea1 d1kwga2 d1wdpa\_ d1gcya2 d1g5aa2 d1hvxa2  
d3dhpa2 d2bhua3 d4do4a1 d3qgva1 d1e43a2 d1g94a2 d2d3na2 d1gjwa2  
d1gvia3 d1x1na1 d1r7aa2 d1tz7a1 d4toqa\_ d1wb0a1 d1w9pa1 d1eoka\_  
d1itxa1 d1kfwa1 d1goia2 d1edqa2 d2gsja\_ d1hjxa1 d1jnda1 d1vf8a1  
d1umqa\_ d1g2ha\_ d1t77a2 d1e5wa2 d1j19a2 d1isna2 d2a16b2 d1g4ma1  
d1x14a1 d3vsqa\_ d2gixa1 d1p7ba1 d1b9ra\_ d1offa\_ d1frra\_ d3wcqa\_  
d1e9ma\_ d1l5pa\_ d1wria\_ d1i7ha\_ d3av8a\_ d1czpa\_ d1rfka\_ d3p1ma1  
d3b2ga\_ d2bt6a2 d1wgqa1 d1v89a1 d2coda1 d1zc3b\_ d1wg7a1 d1u5ea1  
d1v61a1 d2coca1 d2ys1a1 d1v5pa1 d1nty2 d1wjma1 d1wila1 d1u29a\_  
d1xx0a1 d1unqa\_ d2zkmx3 d1fhoa\_ d1v88a1 d2adza1 d1x1fa1 d1p6sa\_  
d2coaa1 d1btka\_ d1v5ma1 d1faoa\_ d2x18a\_ d1dyna\_ d1x1ga1 d4kaxb\_  
d2j59m1 d1ki1b2 d1xcga2 d1txda2 d1u5da1 d1dbha2 d1wlha\_ d1upqa\_  
d1v5ua1 d1foea2 d2fjla1 d1eaza\_ d2dfka2 d2cofa1 d1kz7a2 d9ldta1  
d2ewda3 d1up7a1 d2dfda1 d1s6ya1 d1vjta1 d7mdha1 d1hyea1 d1t2da1  
d1ojsa3 d1b8pa1 d1ldna1 d1hyha1 d1civa1 d2a92a1 d1ez4a1 d1i0za1  
d1y6ja1 d1gv0a1 d1ur5a1 d1ll1da1 d1obba1 d1v8ba1 d1gdha1 d1l7da1  
d2dlda1 d1ygya1 d1qp8a1 d1li4a1 d1j4aa1 d2naca1 d1npya1 d3t4ea2  
d1a4ia1 d1o0sa1 d2hk9a2 d2egga2 d1b26a1 d1bvua1 d1gg2a1 d1c1da1  
d1leha1 d1gtma1 d1euzal d3dona2 d1edza1 d1gpja2 d1vi2a1 d1p77a1  
d1nyta1 d1b0aa1 d1vl6a1 d1v9la1 d3wdpp1 d3wq5a\_ d1gnxa\_ d4gxpa\_  
d4hz8a\_ d1e4mm\_ d3aiua\_ d1wcga1 d1qvba\_ d3ahxa\_ d1v02a\_ d2dgaa\_  
d1pbgga\_ d1vffa1 d1qoxa\_ d4ha4a\_ d1kola2 d1f8fa2 d1qora2 d1jqba2  
d1vj0a2 d1cdoa2 d1gu7a2 d1d1ta2 d1xa0a2 d2dm6a2 d1jvba2 d1rjwa2  
d1h2ba2 d1tt7a2 d1piwa2 d1o89a2 d1liz0a2 d1e3ja2 d1yb5a2 d1uufa2  
d1vj1a2 d1e3ia2 d3gpdg1 d1vc2a1 d2nvwal d1u8fo1 d1ydwa1 d1hdgo1  
d2g17a1 d2czca2 d1r0ka2 d1obfo1 d2cvoa1 d1ebfa1 d1h6da1 d1i32a1  
d1zh8a1 d2q49a1 d1qkia1 d1j5pa4 d3pzra1 d1xeaa1 d1vkoa1 d1vm6a3  
d3qvsa1 d2pkqo1 d1b7go1 d1gr0a1 d1p1ja1 d1lc0a1 d1j0xo1 d3pwka1  
d2hjsa1 d1zyao1 d1vkna1 d1t1ta1 d1nvmb1 d3sjua\_ d3ojfa1 d1xu9a1  
d2jjya1 d1n7ha\_ d1y1pa1 d1h5qa\_ d1jtva\_ d4fs3a\_ d2bkaa1 d1gy8a\_  
d2c5aa1 d1ulsa\_ d1ooea\_ d2b69a1 d1y5ma1 d1spxa\_ d1aela\_ d1bxka\_  
d1ydea1 d1gega\_ d1hdoa\_ d1o5ia\_ d1e6ua\_ d1snya1 d2rhca\_ d3zv4a\_  
d5ceja\_ d2d1ya1 d3w8ea\_ d2fmua1 d1x1ta\_ d1rpna\_ d3ay7a1 d1k2wa\_  
d1eq2a\_ d2hrba1 d3ruaa\_ d2ew8a1 d4hwka\_ d1xgka\_ d2bd0a1 d1yo6a1  
d2a35a1 d2ntva\_ d1vl8a\_ d1hdca\_ d4bkua\_ d2ag5a1 d2q45a\_ d1nffa\_  
d4iy1a\_ d1zbqa1 d1kewa\_ d1ek6a\_ d1ja9a\_ d2q46a2 d1iy8a\_ d1cyda\_  
d2ptga\_ d1hxha\_ d1uzma1 d3lyla\_ d4m89a\_ d3wyea\_ d2b11a1 d1w6ua\_  
d1sb8a\_ d2q2va\_ d4nr0a\_ d1e6wa\_ d2gasa\_ d3oiga1 d2bgka1 d1mxha\_  
d1vl0a1 d1rkxa\_ d1r6da\_ d1wmaa1 d1e7wa\_ d2c07a1 d1xkqa\_ d3tzha\_  
d1g0oa\_ d3lz6a\_ d1qyca\_ d1ledoa\_ d1gz6a\_ d1loc2a\_ d1t2aa\_ d1zema1

d2xoxa\_ d1z45a2 d1geea\_ d1p33a\_ d31t0a\_ d4e6pa\_ d2wyua\_ d1db3a\_  
d4q9na\_ d1xh1a\_ d4o1ma\_ d1fmca\_ d2uvda\_ d2gdza1 d1uaya\_ d2z1ma\_  
d2o23a2 d2fr1a2 d2fr1a1 d1qsga\_ d1qyda\_ d4zjua\_ d2a4ka1 d1yb1a\_  
d1wvga1 d1yxma1 d3f4ba\_ d1mg5a\_ d1xg5a1 d1r55a1 d3gboa\_ d1kufa\_  
d1buda\_ d4q11a\_ d1quaa\_ d1yp1a\_ d1wnia\_ d3nqyb\_ d4gera\_ d1bqba\_  
d1ex0a4 d1g0da4 d2f4ma1 d1x3za\_ d1mdwa\_ d1ziva1 d1zcma1 d2w0pa\_  
d2diaa1 d2e9ia2 d2e9ja1 d2dj4a1 d2eeba1 d2diba1 d2dmba1 d2dmca1  
d2d7oa1 d2ee6a1 d2d7pa1 d2eeaa1 d2di8a1 d1wlha1 d2d7na1 d2nqca\_  
d2d7ma1 d2dica1 d3cnka\_ d2k3ta1 d2eeca1 d1qfha2 d2bp3a1 d1v05a\_  
d2ee9a1 d2eeda1 d2di9a1 d3ioqa\_ d1fh0a\_ d1o0ea\_ d1khqa\_ d1m6da\_  
d2cb5a\_ d1cs8a\_ g8pch.1 d1s4va\_ d2pnsa\_ d1vsna1 d1mira\_ d1iwda\_  
d2oula\_ d7pcka\_ d3bwka\_ d3bcna\_ d2p86a\_ d1pvja\_ d1pcia\_ d1gece\_  
d1deua\_ d4bs6a\_ d1xkga1 d1cqda\_ d1jqpa2 d2c0ya\_ d2bdza\_ d3p5ua\_  
d2o36a\_ d1k9xa\_ d1zoya1 d1qo8a2 d1d4ca2 d1chua2 d1kf6a2 d2jk6a2  
d2jk6a1 d1feca1 d1feca2 d1lpfa1 d1lpfa2 d1xhca1 d1xhca2 d1dx1a2  
d1dx1a1 d1gera2 d1m6ia2 d1onfa1 d1onfa2 d3lada2 d3lada1 d1w4xa1  
d1w4xa2 d1gesa2 d1mo9a1 d1xdia1 d1fl2a2 d1fl2a1 d1fcda1 d1fcda2  
d1h6va2 d1h6va1 d1mo9a2 d1gv4a2 d1gv4a1 d2gv8a2 d2gv8a1 d1aoga1  
d1aoga2 d1hyua1 d1ebda1 d1ebda2 d3dk9a1 d1q1ra2 d1q1ra1 d1gesa1  
d3syxa1 d2p8va\_ d1xoda1 d1i7aa\_ d1evha\_ d1qc6a\_ d1legxa\_ d1ps9a2  
d1o94a2 d1lqta1 d1cjca1 d1reoa1 d1ju2a1 d2f5va1 d3c96a1 d2gmha1  
d1pj5a2 d1gpea1 d1o5wa1 d1n4wa1 d1k0ia1 d2dw4a2 d2ivda1 d1seza1  
d2voua1 d1kdga1 d1s5ja1 d2hbja2 d2igia\_ d1wlja\_ d1qhta1 d4dlea1  
d1tgoa1 d2f96a1 d3tr8a1 d3mxma\_ d1q8ia1 d1y97a1 d1w0ha\_ d1kfsa1  
d2py5a1 d1noya\_ d1d5aa1 d1yt3a3 d2guia\_ d3mwpa1 d4kbl1a\_ d1liuka\_  
d2csua1 d3q9ub\_ d2yv1a1 d3q9na\_ d2d59a\_ d1oi7a1 d2yv2a1 d1y81a1  
d2av4a1 d3nvva1 d1krha3 d2h88b1 d1n62a2 d1t3qa2 d1kf6b2 d1zoyb1  
d1jq4a\_ d1ffva2 d1dgja2 d1rm6c2 d1k8ka2 d1k8ka1 d3uleb1 d3i33a2  
d3i33a1 d1bupa1 d1dkgd1 d4ci6a2 d1jcfa1 d4a2ba2 d2fxua1 d1yaga2  
d1yaga1 d4cbua2 d1bupa2 d1r7ha\_ d1faaa\_ d1wika1 d1xfla\_ d1ttza1  
d2f51a1 d1ti3a\_ d1nhoa\_ d1sena\_ d2i4aa\_ d1ep7a\_ d1zmaa1 d1fo5a\_  
d3lefa1 d3diea1 d2yana1 d1z6na1 d1oaza\_ d3zywa1 d4aj8a\_ d1nm3a1  
d4fiwa\_ d1wmja\_ d4hs1a1 d1liloa\_ d1xwaa1 d1wjka1 d2vm1a\_ d1fb6a\_  
d1gh2a\_ d1h75a\_ d1nw2a\_ d1kx5b\_ d3a6na\_ d4m6ba2 d2nqbd\_ d3wkjd\_  
d2yfwe\_ d4h9na\_ d5bnxa\_ d1kx5c\_ d3r45a\_ d1eqzb\_ d4jjnb\_ d1f66c\_  
d4wnnb\_ d1kx5a\_ d1u35c1 d1id3a\_ d2nqbc\_ d1kx5d\_ d3us3a3 d3us3a1  
d1um8a\_ d1qvra2 d1qvra3 d1qzma\_ d1sxjc2 d1jr3d2 d2p65a\_ d1l8qa2  
d1g8pa\_ d3hu3a3 d1sxjd2 d1njfa\_ d1in4a2 d1sxja2 d1tuea1 d2ce7a2  
d1w5sa2 d1sxjb2 d1d2na\_ d1ny5a2 d1ofha\_ d2gnoa2 d2a5yb3 d1fnna2  
d1u0ja1 d1lv7a\_ d1iqpa2 d2fnaa2 d1ixsb2 d4gita\_ d1sxje2 d1g41a\_  
d1pd212 d1nhya2 d2a2ra2 d1k0dd2 d1f2ea2 d1gsua2 d1f3ba2 d2fhea2  
d2pvqa1 d1tw9a2 d1oyja2 d1e6ba2 d3ik7a1 d4is0a1 d1r5aa2 d1jlva2  
d1m0ua2 d3gtub2 d1z9ha2 d1okta2 d1axda2 d2gsra2 d1tu7a2 d1k3ya2  
d1zgma1 d1b48a2 d1gnwa2 d1gwca2 d2gsta2 d1glqa2 d1oe8a2 d1pn9a2

d1v2aa2 d1fw1a2 d1duga2 d1g7ea\_ d1ig8a1 d1czan2 d1czan3 d1czan1  
d1ig8a2 d1czan4 d1bg3a4 d1bg3a3 d1bg3a2 d1bg3a1 d3wyha\_ d4g9sa1  
d3gxra\_ d1qqya\_ d1gd6a\_ d1f6ra\_ d1livma\_ d2gv0a\_ d1iiza\_ d2z2fa\_  
d1j8xa\_ d1ghla\_ d1b9oa\_ d1741a\_ d1691a\_ d2o4wa\_ d1p37a\_ d1k28a3  
d1xjta1 d1jtma\_ d2f2qa\_ d4e97a1 d1iyka2 d1rxta1 d1iica2 d1iica1  
d2pjsa1 d1k11a\_ d2i7ra1 d1ecsa\_ d1xqaa1 d5cj3a1 d1jifa\_ d2p7oa\_  
d1r9ca\_ d1nkia\_ d1mpya2 d1kw3b2 d1kw3b1 d4ghga1 d1tfza1 d3isqa1  
d3isqa2 d1sqia1 d1sqia2 d1lkda2 d1lkda1 d1mpya1 d1cjxa1 d1sp9b2  
d1t47a1 d1t47a2 d1f1ua2 d1sp8a1 d1sp8a2 d1f1ua1 d4iuaa3 d4bvva\_  
d5hpga\_ d3k65a\_ d1ki0a3 d1ki0a2 d1ki0a1 d1a0ha1 d1pmla\_ d3sp8a3  
d2feba1 d1qsta\_ d2beia1 d4m3sa\_ d1u6ma1 d1ygha\_ d1yk3a1 d3dr6a\_  
d1xmta\_ d1z4ea1 d2ge3a1 d1bo4a\_ d2fiaa1 d2jdca1 d1y9wa1 d3to7a\_  
d1wwza1 d2f14a1 d2ozua1 d2b5ga\_ d2cy2a1 d2p0wa\_ d1cm0a\_ d4pswa\_  
d1yrea1 d1yr0a1 d1m4ia\_ d2gana1 d1yvka1 d2g3aa1 d1y7ra1 d2euia1  
d1q2ya\_ d2fsra1 d1xeba\_ d2ae6a1 d1cjwa\_ d1qsm\_ d2aj6a1 d1y9ka1  
d1i12a\_ d1vkca\_ d2atra1 d1n71a\_ d2d4pa1 d2fiwa1 d2fe7a1 d1tiqa1  
d2ou2a\_ d1yx0a1 d2fcka1 d1p0ha\_ d2j8ma\_ d2pq8a\_ d1z4ra1 d1s3za1  
d1ufha\_ d2hqya1 d2hqya2 d1lrza2 d1ne9a1 d1lrza3 d1xvqa1 d1pn0a2  
d3hy2a\_ d2cvba1 d1o8xa\_ d1lu4a\_ d1we0a1 d2bmx1 d2a4va1 d1psqa\_  
d1xiya1 d1q98a\_ d1n8ja\_ d1zofa1 d2ggta\_ d3tjja\_ d4je1a1 d1o73a\_  
d3s9fa\_ d2zcta\_ d1qmva\_ d1jfua\_ d2b1ka\_ d5dvba1 d2b5xa1 d2v2ga\_  
d1st9a\_ d3tb2a\_ d411ra\_ d4fh8a1 d1e2ya\_ d2h30a\_ d1i5ga\_ d2z9sa\_  
d2f8aa1 d1tp9a1 d2b7ka\_ d1nm3a2 d3hvva\_ d2wfca1 d4kcea\_ d1xvwa1  
d4gqca1 d3qpma\_ d4k1fa\_ d1zzoa1 d1gp1a\_ d1prxa\_ d4od7a1 d1z6ma1  
d4mcua1 d4dvca1 d1r4wa\_ d3l9sa\_ d1un2a\_ d3rppa\_ d1zsq1 d2m5ta\_  
d1cqqa\_ d1wqsa\_ d5bpea\_ d2ipha\_ d1lvoa\_ d2bhga1 d3tnta\_ d3sjia\_  
d3d23a1 d2fyqa\_ d3tloa\_ d3zvea1 d2hrva\_ d3q3ya1 d4asha1 d1e88a1  
d1l6ja5 d1eaka4 d1eaka3 d1l6ja3 d1h8pa2 d1h8pa1 d1jgta2 d1ea0a3  
d1ecfa2 d1q15a2 d1ct9a2 d1ao0a2 d1te5a\_ d1ysl1x\_ d4hs9a\_ d1ispa\_  
d1ex9a\_ d1ku0a\_ d3qmma\_ d1lgya\_ d4l3wa\_ d1llfa\_ d1gz7a\_ d1ukca\_  
d1ktja\_ d3groa\_ d1pjaa\_ d1thta\_ d2ftba\_ d1pmpa\_ d2rcqa1 d4lkpa\_  
d1sa8a\_ d1vyfa\_ d1lpja\_ d3vg7a1 d4azqa1 d1o8va\_ d5bvqa\_ d1p6pa\_  
d2qo4a\_ d1opba\_ d1yiva1 d1o1va\_ d4bvma1 d4tkba\_ d4i3ba\_ d1bwya\_  
d1ftpa\_ d1ggla\_ d4gkca\_ d1cbia\_ d3p6da1 d1kqwa\_ d2a0aa1 d3zxha\_  
d1rm8a\_ d1eaka2 d1hy7a\_ d2jsda\_ d1cxva\_ d1hv5a\_ d1i76a\_ d3p0ya1  
d1igra1 d1igra2 d1n8yc2 d1n8yc1 d1m6ba2 d1m6ba1 d4dv8a2 d1dzka\_  
d4tlja\_ d2a2ua\_ d4wfva\_ d3tlda\_ d4iaxa\_ d3zq3a\_ d2nnda\_ d1i4ua\_  
d1kxoa\_ d1bbpa\_ d1kt7a\_ d1exsa\_ d3s26a1 d1lf7a\_ d1qfta\_ d4gh7a\_  
d1z24a1 d1qabe\_ d1xkia\_ d1ew3a\_ d3bx7a\_ d4iawa1 d1n0sa\_ d3kzaa\_  
d2k23a\_ d2l9ca1 d2joza1 d1gm6a\_ d3kffa\_ d3saoa1 d1e5pa\_ d1yupa1  
d1iiua\_ d2tbvc\_ d1x36a\_ d1smvc\_ d1ng0c\_ d4sbvc\_ d1lopa\_ d1f2nc\_  
d1cixa\_ d1y29a\_ d1v7fa\_ d2jtba\_ d1d1ha\_ d1g9pa\_ d1lupa\_ d1qk7a\_  
d1mb6a\_ d2a2va\_ d1niya\_ d1i25a\_ d1hvwa\_ d2mpqa\_ d1ie6a\_ d1la4a\_  
d2mxoa1 d1d10a\_ d1koza\_ d1qk6a\_ d1emxa\_ d1lqra\_ d1c6wa\_ d1rypd\_

d1irua\_ dlrypc\_ d3unfk\_ dlrypa\_ dlj2pa\_ d1irui\_ dlj2qh\_ d3unfh\_  
dlm4ya\_ dlrypb\_ dlirul\_ dlirug\_ dliru2\_ dlq5rh\_ dlrypg\_ dlq3ka\_  
dliruf\_ dlq5qa\_ d1e94a\_ dlirub\_ dlryph\_ d3ty6a\_ dliruj\_ dliruk\_  
dlrype\_ dlirud\_ dlirue\_ d3mi01\_ dlrypf\_ dliruh\_ d2z3ba\_ dliruc\_  
d3mka2\_ dlirul\_ g1gk9.1 g1cp9.1 g1e3a.1 d1mqta\_ d1d4m3\_ d1fmd3\_  
d2mev1\_ g1aym.1 d1ev13\_ d4q4w1\_ d1r1a3\_ d2x5ia\_ d1rhi1\_ g1r1a.1  
g1d4m.1 g1rhi.1 d1b35b\_ d1loopa\_ d1tme1\_ d4iv1a\_ g1pvc.1 g1fnp.1  
d1fnp1\_ d4gb31\_ d1d4m1\_ d1fmd1\_ d1ev11\_ d2wzr3\_ g1cov.1 d1qqp3\_  
g1fmd.1 d2x5ic\_ d1rhi3\_ g1oop.1 d1hxs1\_ g1hxs.1 d1fnp3\_ d1bev1\_  
d1eah3\_ d1aym1\_ d1pvc3\_ d1qqp1\_ d1zba3\_ d1h8ta\_ d3vbhc\_ g1b35.1  
g1bev.1 d1hxs3\_ g1ev1.1 d1bev3\_ g1tmf.1 d1tmf1\_ d1b35a\_ d2mev3\_  
g1eah.1 g1h8t.1 d1eah1\_ d4q4w3\_ d1r1a1\_ d1aym3\_ d1pvc1\_ d1zba1\_  
d1h8tc\_ d1loopc\_ d1tme3\_ g1qqp.1 d4iv1c\_ g1tme.1 d1p8ba\_ d1eixa\_  
d3exra\_ d2ffca1 d2fdsa1 d3n3ma1 d2czda\_ d1q6oa\_ d2yyua\_ d1vqta1  
d1dbta\_ d3ldva1 d1fvia1 d1ckma1 d1p16a1 d1x9na2 d2r80b\_ d1cqxa1  
d1cg5a\_ d1gcvb\_ d3boma\_ d2h8fb\_ d2raoa\_ d3bj1a\_ d4hrrb\_ d2r50a\_  
d3d1kb\_ d2aa1b1 d3zhwa\_ d3hf4b\_ d3gdja\_ d1jebb\_ d3bj1b\_ d1x9fb\_  
d1wmub\_ d1gcva\_ d3bcqb\_ d3d4xb\_ d2dc3a\_ d3hf4a\_ d4yu3a\_ d3k8ba\_  
d1qpwb\_ d2r80a\_ d3bcqa\_ d1v4wa\_ d3wtgb\_ d1j17a\_ d4esaa\_ d1a9we\_  
d3d1ab\_ d1fsla\_ d4h21a\_ d1v4wb\_ d1mwca\_ d1vhba\_ d1jeba\_ d1spgb\_  
d1h97a\_ d1q1fa\_ d1tu9a1 d3d1aa\_ d1hdsb\_ d3hyub\_ d2zfb\_ d3fs4a\_  
d1oj6a\_ d1shrb\_ d4h21b\_ d4yu3b\_ d1spga\_ d3hrwa\_ d3qqra\_ d3at5a\_  
d4wchd\_ d3hyua\_ d1cg5b\_ d1uc3a\_ d1hbra\_ d2raob\_ d1outb\_ d4esab\_  
d3gdjb\_ d3qqqa\_ d1x9fc\_ d3vrfa\_ d1litha\_ d3mkba\_ d3d4xa\_ d3mjpa\_  
d1j16a\_ d3fh9a\_ d1outa\_ d2dc3b\_ d1lit2a\_ d3eoka\_ d3g46a\_ d1qpwa\_  
d3vrfb\_ d1ch4a\_ d1x9fd\_ d1hdsa\_ d2zfb\_ d3mkbb\_ d1or4a\_ d3wtga\_  
d1a4fa\_ d3fh9b\_ d3bomb\_ d3cy5a\_ d3at5b\_ d1x9fa\_ d2oifa\_ d4lmb\_  
d1cpcb\_ d3v57a\_ d1kn1a\_ d1cpca\_ d4f0ta\_ d2vjha\_ d4po5b\_ d1eyxa\_  
d1alla\_ d4f0tb\_ d1b33b\_ d1b8db\_ d4h0mb\_ d2vjhb\_ d4l6b\_ d2vmlb\_  
d1allb\_ d2vjta\_ d3dbja\_ d2vmla\_ d2vjtb\_ d4f0ub\_ d1f99b\_ d4rmpa1  
d1lliaa\_ d1eyxb\_ d2uulb\_ d4lmsb\_ d4f0ua\_ d2bv8a\_ d1f99a\_ d2bv8b\_  
d2c71b\_ d3dbjb\_ d4rmpb1 d1b8da\_ d4h0ma\_ d3v57b\_ d1kn1b\_ d1liab\_  
d2uula\_ d2j96a\_ d3ia2a\_ d1a88a\_ d4dgqa1 d1hkha\_ d1zoia\_ g1gxs.1  
d2xqfa\_ d1ea5a\_ d1f6wa\_ d1dx4a\_ d1qe3a\_ d1k4ya\_ d4qwwa\_ d2ha2a\_  
d1r88a\_ d1sfra\_ d4qeka\_ d3c8da2 d2pbla1 d1jkma\_ d1jjia\_ d1lzl\_a\_  
d1jjfa\_ d1jmx4 d1jmx3 d1pbya4 d1pv8a\_ d1w5qa\_ d2c1ha\_ d1ohla\_  
d1l6sa\_ d1f74a\_ d3l21a\_ d2e1da\_ d1to3a1 d1w3ia\_ d1sfla\_ d1n7ka\_  
d1vcva1 d4imea\_ d1wa3a\_ d2ocza1 d1f2ja\_ d3m16a\_ d2yxga\_ d1ub3a\_  
d3a5fa\_ d1fbaa\_ d1l6wa\_ d1xfba1 d1wx0a1 d1vpxa1 d1ojxa\_ d1mxsa\_  
d2a4aa1 d1xkya1 d3cq0a1 d3s1xa\_ d1f05a\_ d1fdja\_ d3cpa1 d4d2ja\_  
d1cg2a1 d1yloa2 d1y7ea2 d1y0ya3 d1l1fwa1 d1vixa1 d1fnoa4 d1vhoa2  
d1ysja1 d1vhea2 d1z21a1 d2fvga2 d1r3na1 d2grea2 d1xmba1 g1q71.1  
d1rtqa\_ d3rp2a\_ g1lucy.1 d1fuja\_ d2zchp\_ d3w94a\_ d1si5h\_ d1lo6a\_  
g2pka.1 d1cgha\_ d1kigh\_ d1a5ia\_ d3s9ba\_ d1hj8a\_ d1ao5a\_ d2anya\_



d1q3xa1 d1gvza\_ dlazza\_ d4gsoa\_ d2f91a1 dliaua\_ dlgdna\_ dleufa\_  
g1fiw.1 d1eq9a\_ d4nfea\_ d2rdla\_ dlspja\_ d1elva1 d1a7sa\_ dlekbb\_  
d1pfxc\_ d1yc0a\_ d2aiqa\_ g1fiz.1 d1fi8a\_ d4k60a\_ d4dgja\_ d1mzaa\_  
d1op0a\_ d3tjva\_ d1pytd\_ d1sgfg\_ g1gg6.1 d2eeka\_ g1rtf.1 d1a0ja\_  
d3g01a\_ d1pytc\_ d4e7na\_ d1ddja\_ d1z8ga1 d2hlca\_ d1npma\_ d1brup\_  
g1jou.1 d1sgfa\_ d1autc\_ g2hnt.1 g1kdq.1 d1orfa\_ d3s69a\_ d4crga\_  
d1fxya\_ d1bqya\_ d1ra6a\_ d3gsza\_ d1khva\_ d1te9a\_ d2xwha\_ d3uqsa\_  
d3hkwa\_ d3n6ma\_ d2cjqa\_ d2xyma\_ d1teba\_ d1te8a\_ d1s48a\_ d1u09a1  
d4wfxa\_ d3tyqa\_ d2pgga1 d1m41a\_ d2bk7a\_ d3fjua\_ d1z5ra1 d1kwma1  
d1uwya2 d2c1ca1 d1dtda\_ d1h81a2 d3lgia\_ d3i77a\_ d2z9ia2 d4nsva\_  
d1lcya2 d4jcna\_ d1agja\_ d1os8a\_ d1hpga\_ d1p3ca\_ d1l1ja\_ d1e69a\_  
d1mv5a\_ d3g60a4 g1ii8.1 d1ewqa2 d1ji0a\_ d1qhl\_ d1v43a3 d2wmfa1  
d1vpla\_ d1g2912 d4a82a2 g1f2t.1 d2d62a1 d3tuic1 d2bbsa1 d3g60a3  
d2ixea\_ d1g6ha\_ d1sgwa1 d2qi9c\_ d3rlfa1 d3b60a1 d3d31a2 d2pzea1  
g1xew.1 d1jj7a\_ d1oxxk2 d2onka1 d1w1wa\_ d1iwea\_ d1qf5a\_ d1vmaa2  
d1nija1 d1np6a\_ d2p67a1 d3ihla\_ d1okkd2 d1ls1a2 d1s1ma2 d1iona\_  
d2v40a\_ d3hida\_ d2vola1 d2g0ta1 d1vcoa2 d1j8mf2 d1g3qa\_ d1xjca\_  
d1p9ba\_ d1qzxa3 d1ihua2 d1ihua1 d2qm8a\_ d1dj2a\_ d4ioja\_ d1cp2a\_  
d1yrba2 d1hyqa\_ d3gqba2 d1skye3 d1xp8a1 d1tf7a2 d1tf7a1 d1ye8a1  
d1skyb3 d2qe7d2 d4blta\_ d4huta\_ d3ltaa2 d4hyya\_ d2i3ba1 d1crla\_  
d3j9tb2 d3ntua2 d1vdza1 d2z43a\_ d1e9ra\_ d1nlfa\_ d3ziaa2 d1n0wa\_  
d1g6oa\_ d3ziad2 d3j9ta2 d1pzna2 d3gqbb2 d2i49a\_ d1nnfa\_ d1xvxa\_  
d1ursa\_ d1h3da1 d1iuda\_ d4m1va1 d1twya\_ d3e13x\_ d2nxoa1 d4pfua\_  
d3ttma\_ d1elja\_ d2qmw1 d1us5a\_ d1y3na1 d1jeta\_ d1ugwa\_ d4f19a1  
d2esna2 d3thia\_ d3fasa1 d2uyeb\_ d2xwva1 d1r9la\_ d2fyia1 d2ozza1  
d1sw5a\_ d1nh8a1 d1vr5a1 d2g29a\_ d1xs5a\_ d3lswa\_ d2z23a\_ d3w9va\_  
d3tcha\_ d1q35a\_ d1z7me1 d3q27a\_ d1p99a\_ d1ve4a1 d2i6ea1 d4mcoa1  
d4n8ya\_ d1eu8a\_ d1zbma1 d1hsla\_ d1lixca2 d1j1na\_ d1xvya\_ d1y9ua\_  
d2z22a1 d1xoca1 d4oera\_ d1wdna\_ d5f1qa1 d1xt8a1 d1i6aa\_ d4gwoa\_  
d4igta1 d1pc3a\_ d4mmpa1 d1o63a\_ d2czla1 d2onsa2 d4mija1 d1eh3a\_  
d3skpa\_ d1dtza1 d1dtza2 d1ieja\_ d1jnfa2 d1ce2a1 d1jnfa1 d1b1xa2  
d1b1xa1 d1jw1a1 d1jw1a2 d1ryoa\_ d1h76a1 d1h76a2 d1etha2 d1w52x1  
d2ppla1 d1lpbb2 d2oxea1 d1bu8a2 d1rpla2 d1c4oa1 d2p6ra3 d2p6ra4  
d1oywa2 d1oywa3 d1wrba1 d1w36b2 d1w36b1 d1c4oa2 d3bora\_ d1t6na\_  
d2eyqa5 d2eyqa3 d2eyqa2 d2zu6a2 d1veca\_ d1uaaa1 d1w36d1 d2g9na1  
d1z3ix2 d2rb4a\_ d1hv8a1 d1hv8a2 d1t5ia\_ d1w36c2 d2j0sa2 d2j0sa1  
d3hjha1 d1z5za1 d1qdea\_ d1z63a1 d1s2ma2 d1s2ma1 d1wp9a1 d1wp9a2  
d1gm5a3 d1gm5a4 d3dina4 d3dina3 d1q0ua\_ d1w36c1 d1z3ix1 d1nkta3  
d1nkta4 d1uaaa2 d1w36d2 g1qhh.1 d2fwra2 d2fwra1 d3q3ma\_ d1za0a1  
d1mxra\_ d2inca\_ d1jk0a\_ d2incb\_ d1mhyb\_ d3hf1b\_ d1mtyb\_ d1r2fa\_  
d2uw1a\_ d1mhyd\_ d3n37a\_ d1afra\_ d1syya\_ d1mtyd\_ d2o1za\_ d1uzra\_  
d1sma\_ d2cbia2 d1gqia1 d2choa2 d1oewa\_ d2qzxa\_ d2asia\_ d1psoe\_  
d1miqa\_ d1smra\_ d2h6ta\_ d1pfza\_ d1lizda\_ d3hd8a\_ d1j71a\_ d1dpja\_  
d4aa9a\_ d1t6ex\_ g1b5f.1 g1lya.1 g1htr.1 d1qdma2 d1bxoa\_ d1wkra\_

d1tzsa\_ d1libqa\_ d2qzwa\_ d1ex4a2 d1c6va\_ d2v76a\_ d1wj1a1 d1aqca\_  
d1qqga1 d1ntva\_ d1n3ha\_ d4dbba\_ d3f0wa1 d1p3ra\_ d1wgua1 d2cy4a1  
d3hqca\_ d1wvha1 d1xr0b1 d1bdqa\_ d3ggta\_ d3ixoa\_ d1mrxa\_ d2haha\_  
d1tw7a\_ d4njsa\_ d1sgua\_ d2p3da\_ d1nsoa\_ d3d3ta\_ d2rkfa\_ d1c6ya\_  
d2rspa\_ d3ogpa\_ d3ekwa\_ d2o4na\_ d2j9ja\_ d1baia\_ d3ggua\_ d3lzua\_  
d4npua\_ d4j55a\_ d2r8na\_ d2fxda\_ d2p3ca\_ d4dqa\_ d3ttpa\_ d3t3ca\_  
d2p3aa\_ d2hc0a\_ d2fdda\_ d3mwsa\_ d1wgra1 d1ef5a\_ d1wfy1 d1e8ya3  
d1wgya1 d1lfda\_ d2cs4a1 d1wxma1 d2byea1 d3kh0a1 d2byfa1 d1wxaa1  
d1e7ua3 d1h4ra3 d4y18a1 d2a16a3 d1wgda1 d1wgg1 d4q5eb\_ d1wjna1  
d1se9a\_ d3n3kb\_ d1wz0a1 d1we6a1 d2m0xa\_ d2gbka\_ d3rt3b1 d1wh3a1  
d1sifa\_ d2ekek2 d4ii2b1 d4hk2a1 d1c3ta\_ d1m94a\_ d1wgha1 d1ttna1  
d1j8ca\_ d1wx8a1 d3v6cb1 d2ma9b\_ d4i61b1 d1bt0a\_ d2jvca1 d1iyfa\_  
d2k1fa\_ d1wxva1 d1wf9a1 d1t0ya\_ d2io0b2 d1x1ma1 d2gbma\_ d1zw7a1  
d2m17a\_ d1ud7a\_ d1we7a1 d2l1wa\_ d2gbja\_ d1wjua1 d1v6ea1 d1v86a1  
d4eewa\_ d1w1aa1 d4icva\_ d4gu2a\_ d1wx7a1 d1wy8a1 d4hjka1 d2faza1  
d1v5oa1 d2fkza\_ d1zuj1 d1s3qa1 d2fjca1 d1z6om1 d1veia\_ d4dyya\_  
d1jiga\_ d3gvya\_ d2pyba\_ d4cy9a1 d3bvfa1 d1r03a\_ d2cf7a\_ d1nf4a\_  
d1zs3a1 d4iwka\_ d3ka8a\_ d3np0x\_ d1n1qa\_ d11b3a\_ d4e6ka\_ d1z6oa1  
d2fzfa1 d4dyua\_ d3ge4a\_ d1jgca\_ d4am4a\_ d2z6ma\_ d1ji5a\_ d1vlga\_  
d11koa1 d1krqa\_ d3qz3a\_ d1o9ra\_ d2ffxj\_ d1yv1a1 d2v2pa\_ d1j30a\_  
d4di0a\_ d1dpsa\_ d2a13a1 d2cr5a1 d1wj4a1 d1s3sg\_ d1tafa\_ d1bh9b\_  
d1tafb\_ d1jf1b\_ d1h3ob\_ d2byka1 d1n1ja\_ d4g92b\_ d1bh9a\_ d1jf1a\_  
d1h3oa\_ d2bykb1 d1n1jb\_ d4lu0a\_ d3unda1 d3e9aa1 d1vr6a2 d1n8fa\_  
d2qkfa\_ d1d9ea\_ d1o60a\_ d3h33a\_ d1rwja\_ d19hca\_ d1os6a\_ d3bxua\_  
d3h4na\_ d1i77a\_ d3caoa\_ d1j0pa\_ d2ctha\_ d1duwa\_ d1ofwa\_ d2e84a\_  
d1hh5a\_ d3h34a\_ d2bcgg1 d2bcgg2 d1wioa4 d1ccza2 d1vcaa1 d1dr9a2  
d1ic1a1 d2d9qb1 d2nxyb2 d2dara2 d2dara1 d1wyha2 d2dloa2 d1rutx4  
d1rutx3 d2cuqa2 d1x41a2 d1x41a1 d1x3ha2 d1x3ha1 d2d8za1 d1x61a2  
d1x6aa1 d1x6aa2 d2cora2 d2cora1 d1v6ga1 d1v6ga2 d2d8za2 d1x64a1  
d1x64a2 d1b8ta1 d2co8a1 d1x63a2 d2dj7a2 d2dj7a1 d2cu8a2 d2cu8a1  
d1g47a2 d1g47a1 d1j2oa1 d1wyha1 d2dloa1 d1wiga1 d1wiga2 d2cupa2  
d2cupa3 d1x68a1 d2d8ya2 d2d8ya1 d1m3va2 d1x62a1 d1x68a2 d1x61a1  
d1b8ta3 d1b8ta2 d2d8xa2 d2d8xa1 d1x4ka1 d1x4ka2 d2cuqa1 d1m3va1  
d2co8a2 d1j2oa2 d1x63a1 d2cura1 d2cura2 d1x62a2 d1svpa\_ d1mbma\_  
d3su6a1 d4agka\_ d1vcpa\_ d1q31a\_ g1n11.1 d3e90b\_ d1ep5a\_ d3u1jb\_  
d2e3fa\_ d1mm0a\_ d2e3ea\_ d21lda\_ d2ny8x\_ d2e3ga\_ d2ny9x\_ d2nz3a\_  
d21j7a\_ d1n4na\_ d2m8bb1 d2kyqa\_ d3psma\_ d1jxca\_ d2g11a\_ d1ugla\_  
d4uj0a\_ d2k4ua\_ d1hp2a\_ d2lu9a\_ d1baha\_ d2meoa1 d1wm7a\_ d1hlya\_  
d1n8ma\_ d1j1za\_ d1wpda\_ d1c55a\_ d1pvza\_ d1wt7a\_ d1wz5a\_ d1m2sa\_  
d1pjva\_ d1c49a\_ d1qkya\_ d2ktca1 d1wmta\_ d1du9a\_ d1j5ja\_ d1r1ga\_  
d1t0za\_ d2i61a\_ d1t1ta\_ d1sn4a\_ d1kv0a\_ d21kba\_ d1npia\_ d1wwna\_  
d1pe4a\_ d2kbka\_ d21i7a\_ d1djta\_ d2kbha\_ d1dq7a\_ d1sega\_ d1omya\_  
d1zywa1 d1jzaa\_ d1n9wa1 d1bbua1 d1e1oa1 d1c0aa1 d1b8aa1 d1l0wa1  
d3a74a1 d1eova1 d1iyjb4 d1iyjb5 d1iyjb3 d1o7ia\_ d4ipca1 d1x3ea\_

d4apva\_ d1jb7a1 d1jb7a2 d1jb7a3 d3kdfa\_ dlue1b\_ dlwjja1 d3eiva\_  
d1xjva2 d1xjva1 d2ccza2 d1se8a\_ d1l1loc\_ d1jb7b\_ dlqvca\_ d3ulla\_  
d1qzga\_ d1miua4 d1miua5 d1miua3 d1y14b1 d2nn6i1 d1i94l\_ d2zjra2  
d1smxa\_ d2qamc2 d1hh2p1 d2r7da1 d1r12a2 d1wfga1 d3bzka4 d1x6oa2  
d3a0ja\_ d2j01d2 d2ja9a1 d4q15a\_ d1hr0w\_ d1luza\_ d2n3sa\_ d2vnud1  
d1h95a\_ d1go3e1 d2nn6h1 d1ne3a\_ d2mo1a\_ d1iz6a2 d1jjga\_ d1e3pa2  
d2ix0a3 d2ix0a2 d21xja\_ d1ueba3 d1ueba2 d2z0sa1 d1u01a1 d2ix0a1  
d2eifa2 d2je6i1 d3i2za1 d2c35b1 d2ahob2 d1t9ha1 d3i4oa\_ d2qall1  
d1jt8a\_ d2nn6g1 d1g6pa\_ d3cama\_ d1i94q\_ d1c9oa\_ d1d7qa\_ d2ba0a1  
d2vnud2 d2vnud3 d1khia2 d2qalq1 d1wi5a1 d1xtda2 d1ny4a\_ d1prtc2  
d1rpma\_ d2shpa1 d1l8ka\_ d2ooqa1 d1g4us2 d1p15a\_ d1lara2 d1lara1  
d1wcha\_ d2fh7a2 d2fh7a1 d3azya\_ d3wvja\_ d1upsa1 d1ajoa\_ d2hyka\_  
d1ajka\_ d2vy0a\_ d1o4ya\_ d3o5sa\_ d3d6ea\_ d3atga\_ d1dypa\_ d1umza\_  
d3i4ia\_ d1c11a\_ d41bqa\_ d1a78a\_ d1s1ta\_ d4no4a\_ d3zsj\_ d3duia\_  
d1is3a\_ d1qmja\_ d1hlca\_ d1tdha3 d1q3ba3 d1ee8a3 d1k82a3 g1qmo.1  
g1len.1 d3zyra\_ d1fnya\_ d1n47a\_ g21tn.1 d1avba\_ d3usua\_ d1dhkb\_  
d1f9ka\_ d1ukga\_ d1g8wa\_ d1g9fa\_ d1wbfa\_ d3wcsa\_ d1g7ya\_ g1loe.1  
d1mvqa\_ d1hq1a\_ d1v6ia\_ d1dbna\_ d1qnwa\_ d1fx5a\_ d4l8qa\_ d1ioaa\_  
d3n35a\_ d3ubra\_ d1qo8a1 d1d4ca1 d2k3va\_ d1ft5a\_ d1qdba\_ d1m1qa\_  
d2j7aa\_ d1ogyb\_ d4fasa\_ d1jnia\_ d1oaha\_ d1sp3a\_ d2h0ba\_ d2erfa\_  
d1h30a2 d3mw4a1 d1pz7a\_ d2r1ba\_ d3v64a1 d1d2sa\_ d3bopa1 d3mw3a1  
d1okqa1 d1okqa2 d1dszb\_ d3cbba\_ d1ynwa1 d1r4ia\_ d1hcqa\_ d2hana\_  
d2hanb\_ d2enva1 d1kb4b\_ d2n11b\_ d1l01a\_ d1cita\_ d1adqa1 d1fnga1  
d1uvqb1 d1zs8a1 d2vola1 d2vola2 d1mfb12 d2jelh2 d1uwel2 d3qq4b1  
d1kjob\_ d1k5na1 d1osph2 d4odh12 d1ow0a1 d1ow0a2 d1bfob2 d3l9ra2  
d3jtth1 d2fath2 d4elkb2 d1fn4b2 d2xfxb\_ d1pg7x2 d1cqka\_ d4k71b2  
d1l2ka1 d1eapb2 d4l1fhg2 d1i4fa1 d2nw2a2 d1kfah2 d1mhca1 d1h3ua1  
d1wejh2 d1h0db2 d1a5fh2 d1kcvh2 d1mjuh2 d1qqda1 d1kcrh2 d1k8ia1  
d3huja2 d2nnab1 d1nfd2 d3mffb2 d1s9va1 d1l3h2 d1q0x12 d1fv1b1  
d1neza1 d4rfeb2 d1r3ha1 d1a6tb2 d1kjva1 d1pz5b2 d1onqa1 d2bc4a2  
d1de4a1 d1k8da1 d1tcra2 d1dn0b2 d1nfd2 d2xwtb2 d1bfoa2 d1mexh2  
d1iakb1 d1ypzf2 d4f7ea2 d1q7212 d2fbjh2 d1fe8h2 d1clzh2 d1fngb1  
d1uvqa1 d1vgka1 d1c16a1 d4j12a2 d4x99b2 d1igtb3 d1je6a1 d1q72h2  
d1nldh2 d1teth2 d2hmic2 d1ilca2 d1ilca1 d1k8ib1 d1q0yh2 d1kfa12  
d3frua1 d1pg7w2 d1u58a1 d1igyb4 d1igyb3 d1hyrc1 d1klub1 d1deeb2  
d1c12b2 d2bc4b2 d1kcv12 d3wn5b1 d1l2b\_ d1l312 d1mju12 d1sm3h2  
d1q0xh2 d1zvs1 d1ydp1 d1u8ib2 d1ypze2 d1kcu12 d1op9a\_ d1y01a1  
d1letzb1 d1egj11 d2gsib1 d1nj9a1 d4jfh1 d1aqk11 d1t2ja\_ d1l04h1  
d1zvya1 d3v4v11 d4enec1 d1kxtb\_ d5e8ea1 d2pxya\_ d4weud\_ d1xiwc\_  
d2esvd1 d1qnzh\_ d1ogae1 d1f4xh1 d4n1hb\_ d3ezjb1 d3mlw11 d1kfah1  
d1letza1 d1b4jh1 d3cfic\_ d4w68a\_ d2arja1 d1ek3a\_ d2ok011 d1vera\_  
d1uwgh1 d1blnb1 d1fpth1 d1rzga1 d2giya1 d4m3kb1 d1nc2a1 d2nyyd1  
d1ncna\_ d1fbih1 d5dxwa\_ d4fqqa1 d1dqdh1 d1jfq11 d1kelh1 d1faih1  
d1frgl1 d1figl1 d4m6n11 d1fo0a\_ d4hxb11 d3b5ga\_ d3quyd1 d2h9gb1

d1i8kb\_ d2dd8h1 d2ck0h1 d1eaja\_ d4w6wb1 d2a6ib3 d1t66d1 d2e27h\_  
d1ob1b1 d1f11b1 d2v7na1 d1ad0a1 d2xt1b1 d1pskh1 d4i13b1 d2op4l1  
d1a0q11 d1uwel1 d1za3a1 d1ncb11 d4uu9a\_ d1bm3h1 d1cloh1 d1nqba2  
d1cf8h1 d4y5va\_ d1mhph1 d5anma1 d4cdgc1 d4ldeb\_ d1y01b1 d2pcpb1  
d1z3g11 d1dfb11 d1fh5h1 d3g5xa1 d1tzib1 d4dn3l1 d3zhka1 d2b1hh1  
d2uy1a1 d1f3dh1 d1nj9b1 d2agjh1 d2h1p11 d1q72h1 d8fabb1 d1ndmb1  
d1rjca1 d4u6hb1 d3upca\_ d2fbj11 d1osph1 d1tvda\_ d2cjh\_ d4fhbd1  
d1bd2d1 d1rz7h1 d3nn8a\_ d1knoa1 d1nfd1 d2bmkb1 d1dq11\_ d1igyb1  
d1igf11 d12e8h1 d3utza1 d1nc2b1 d1rihh1 d4mwfb1 d4jvpa1 d1mieh1  
d1rhfa1 d1fgn11 d1sbsh1 d1lp9e1 d1dn0a1 d4lqf11 d1iaih1 d1kgcd1  
d1mh5b1 d1gpol1 d2g60h3 d1f8t11 d2jixd1 d4grwh\_ d1fo0b\_ d1bfob1  
d1axsa1 d1u9ka\_ d1nmbh\_ d1h8na1 d1h8na2 d1jguh1 d4eura1 d3sdy11  
d35c8h1 d1w72l1 d1mvub\_ d1i9rh1 d1ob1a1 d4wenb\_ d1yeeh1 d3ietc1  
d1f58h1 d1ad0b1 d1mqk1\_ d1nbvh1 d4b50a\_ d3r8bb\_ d1baf11 d1mamh1  
d4rgne1 d2gsgb\_ d35c8l1 d1bafh1 d1ai1h1 d2pcpa1 d2fath1 d2x1pa\_  
d1orsb1 d1ibg11 d1shma\_ d1a2yb\_ d1u0qa\_ d2coqa\_ d1hilb1 d1qfwi\_  
d1jv5b\_ d1fn4b1 d5e0qa\_ d1nsnh1 d1plg11 d4ocx11 d1kb5h1 d1rzfh1  
d1pg7x1 d2fx7h1 d2oi9c\_ d1l7i11 d3eyva1 d1d5i11 d4ffyl\_ d1tet11  
d1a6wh\_ d1ac6a\_ d3dvfa\_ d1nfd1 d1mimh1 d1ri8a1 d1jhlh\_ d3dura\_  
d1fskb1 d1f97a1 d3so3b1 d2ak4d1 d1lp9f1 d4z7wf1 d1l7th1 d4y5ya\_  
d4x7ec1 d1emth1 d1ikf11 d1nlbh1 d4utal1 d1bjma1 d1eapb1 d1u6ah1  
d2dtgd1 d1kj2b\_ d1xeda1 d1c1eh1 d1fgvh\_ d2bnub1 d2fb4h1 d2dtgb1  
d1ktrh\_ d1jpth1 d1qkz11 d4hepg\_ d2atpb1 d1flrh1 d2hrpl1 d1mvfa\_  
d1iaim1 d3k80a1 d2jb5h1 d3zkxc\_ d4grwe\_ d1it9h1 d1rhhb1 d3w9ec\_  
d1e4wh1 d1sy6h1 d2j6eh1 d3qxta\_ d1jglh1 d1p7ka1 d1tzhb1 d4n8pa1  
d1gaf11 d2jelh1 d1wioa2 d4i0cc1 d1cicb1 d1lmka2 d1lmka1 d1iqwh1  
d1orqb1 d1ejoh1 d1jnlh1 d4zg1a\_ d43c9b\_ d1ggb11 d1wejh1 d3q6fa1  
d1f3dj1 d3c61a1 d1bqlh1 d3p9wb\_ d1a3r11 d1h0db1 d2uzil\_ d1eo8l1  
d1qfw1\_ d1n7m11 d1igja1 d1c5ch1 d2a9mh\_ d1rmfh1 d1fj1b1 d4heme\_  
d1ccza1 d1a5fh1 d1ogad1 d1dlfh\_ d1qa9b\_ d1vge11 d3qskb\_ d1sjxa\_  
d4ozfg1 d1sq2n\_ d1qd0a\_ d1kcvh1 d1c5db1 d3qcull1 d8faba1 d3bn9d1  
d1mjuh1 d4y8dc\_ d7fabh1 d3dvgb1 d1l0011 d1a6tb1 d1gigh1 d1kcrh1  
d2hwhz11 d1yjdc1 d3clfl1 d4krna\_ d1dl71\_ d1e6o11 d1mexh1 d3r0ma\_  
d4kkna\_ d1fns11 d1oaqh\_ d1rzia1 d1ucbh1 d1ncw11 d4b41a\_ d1nfd1  
d2mpah1 d2d7t11 d4grwf\_ d4b5ea\_ d1lk3h1 d3u79a\_ d4u3xa\_ d1ghf11  
d1bvkb\_ d1mcww1 d1b88a\_ d1jrhh1 d32c2b1 d4wemb\_ d1dsfh\_ d1op3h1  
d1cell1 d1iqda1 d1qoka1 d1qoka2 d1qfuh1 d2cya1 d1ay1h1 d1oaql\_  
d3ab0b\_ d1rur11 d1t4kb1 d1bz7b1 d1n0xh1 d1for11 d1ucb11 d4w6yb\_  
d43c9a\_ d2aab11 d1tzia1 d4n1ca\_ d1k6qh1 d3g9ab\_ d4tvsa1 d1igmh\_  
d1pz5b1 d3dx9a1 d3wxwh\_ d1nakh1 d1kcul1 d3eaka\_ d4qlra1 d1cr9l1  
d1d9ka\_ d1f4x11 d1deea1 d2i27n2 d1c12a1 d2orbl1 d1j8hd1 d1mcph1  
d1c5da1 d1kenh1 d1bd2e1 d1h5ba\_ d4x7fc1 d3upaa\_ d1t3fa1 d1indh1  
d2dtgc1 d4hc111 d1zv5a1 d4wgvb\_ d1uwgl1 d4f37k1 d1aqkh1 d1vesa\_  
d3zkqd\_ d1fpt11 d1l0411 d1knob1 d3rrqa\_ d1ct8b1 d4orzc\_ d1mlbb1

d4hgkc1 d1dqdl1 d1bogb1 d4ozhe1 d1dr9a1 d1i7za1 d1dn0b1 d1kell1  
d1rzi1 d1ypzfl d1wtla\_ d1hkfa\_ d1fail1 d1figh1 d2vyre\_ d1sjva\_  
d1ohqa\_ d1bfoa1 d1pkqb1 d1mjul1 d1b4j11 d1nsn11 d2arjb1 d1p4bh\_  
d4aj0a\_ d3nn8b\_ d2rcja1 d1f2xk\_ d4v1dd\_ d1adqh1 d2eksa\_ d4k3ga\_  
d1jfqh1 d1uweh1 d1frgh1 d4gftb\_ d1uz8b1 d4nlea\_ d1bm3l1 d1clol1  
d3mcka1 d2vq1a1 d1ae6h1 d4aq1b1 d1uj3b1 d1nbqa1 d1fh5l1 d2ck0l1  
d2ywza\_ d1q72l1 d4nxbx\_ d1hila1 d4hzb1 d2j88l1 d1zmya1 d1cd0a\_  
d1a4ka1 d1pskl1 d1a0qh1 d4krmb\_ d1ncbh1 d2fbjh1 d1j8he1 d1i3ua\_  
d1cf8l1 d1fe8h1 d2p1ya1 d1eeqa\_ d2x89a\_ d1ol0a\_ d2r0lh1 d1ub5a1  
d1dfbh1 d3eyvb1 d4jdvb1 d4p2cg\_ d2gsia1 d2agj11 d1u3ha1 d2h1ph1  
d1rih11 d1fskc1 d1boga1 d2a77l1 d1osp11 d1qfoa\_ d3dwt1 d2fx7l1  
d1rz7l1 d3stba1 d1pkqa1 d1b6da1 d1dzba2 d1dzba1 d1kj2a\_ d4l1ha\_  
d1rzb1 d1dq1h\_ d12e8l1 d1miel1 d1jmaa\_ d1sbs11 d1fgnh1 d1f58l1  
d1mqkh\_ d1ndgb1 d3qeg11 d1iail1 d2aw2a1 d1tqbc1 d3fo2a1 d4dkaa\_  
d1f8th1 d2g60l1 d2ywy\_ d1uj3a1 d1yc7a\_ d3bd3a\_ d4w6xb1 d1nmb1\_  
d1i8ka\_ d1rjlb1 d1ypze1 d1p7kb1 d1kxqe\_ d1gpoh1 d2z4qa1 d1w72h1  
d1i9r11 d4qgya1 d4xt1c\_ d2qqnh1 d1cica1 d3c08h1 d2cd0a\_ d2bdnh1  
d1hnga1 d1mam11 d1nldh1 d1cr9h1 d4lcih1 d3bkyh1 d3qg7l1 d1ai111  
d1kxvc\_ d4iosd\_ d1l7ih1 d2x1qa\_ d1ub6b1 d3k74b\_ d1ibgh1 d1teth1  
d1igya1 d1hxma1 d2x6ma\_ d2e71a\_ d5e03a\_ d1qfwm\_ d2r0kh1 d1igjb1  
d1rurh1 d1plgh1 d1mj8h1 d1yuhb1 d3fmg11 d1rzfl1 d1emt11 d1ad9b1  
d1igtb1 d1nlb11 d1d5ih1 d3k7ua\_ d4ffyh\_ d1bwwa\_ d3dvga1 d1a6ta1  
d1fgvl\_ d4qxgl1 d1mim11 d1jhl1\_ d2hffb1 d2hh0l1 d1qkzh1 d1l7t11  
d1afvh1 d1iaii1 d2cjuh\_ d1um5h1 d2ghwb2 d2ghwb1 d1kgce1 d2fgwh1  
d1ikfh1 d1dvfd\_ d2i24n1 d2xtjb\_ d1za3b1 d2yc1a\_ d2hh0h1 d2x1oa\_  
d1bvka\_ d1rjla1 d5e7ba1 d1igta1 d1il1b1 d2fb4l1 d1mvua\_ d1jpt11  
d32c2a1 d1fvca\_ d1iqdb1 d2hrph1 d2p4ab\_ d4qola\_ d1p2cb1 d1wt5c\_  
d1t4ka1 d5c1mb\_ d1it9l1 d1bz7a1 d1b2wh1 d1e4wl1 d1jnl11 d1yedb1  
d1za6b1 d3u7aa\_ d1igfh1 d3gnml1 d1orsa1 d1wejl1 d1a2ya\_ d1hxmb1  
d1gafh1 d2j4wh1 d1pz5a1 d1j05a\_ d1a3rh1 d4fq1l1 d1qfwh\_ d1eo8h1  
d1n7mh1 d4s11a\_ d1kegh1 d5da4a\_ d1iqwl1 d3whxb1 d1vgeh1 d1deeb1  
d1c12b1 d1t2ql1 d1ad9a1 d3gsnb1 d3b2uc1 d1ggbh1 d1t3fb1 d1nak11  
d4ocmc\_ d1lila1 d2v7hb3 d2esve1 d1mcoh1 d2qr0b1 d2q3aa\_ d1ct8a1  
d1kcr11 d2pxyb\_ d2uzih\_ d5c3ld\_ d3durb\_ d1c5cl1 d2ak4e1 d1dl7h\_  
d1xiwd\_ d1mlba1 d1rmfl1 d1i7zb1 d1dlfl\_ d2xa3a\_ d5bq7b1 d1dqqb1  
d3h42l1 d1egjh1 d1kcv11 d1fe8l1 d2j6el1 d1f3rb2 d1lk3l1 d1sm3h1  
d1q0xh1 d1ghfh1 d7fabl1 d1igch1 d1lo0h1 d4idla\_ d5c2bl\_ d1jrh11  
d1il1a1 d3zhda1 d4kfzc\_ d1b0wa\_ d1e6oh1 d1mex11 d4krpb\_ d1fnsh1  
d1ncwh1 d4hgma\_ d4eigb1 d4rzca\_ d2mpal1 d4y5xa\_ d5en2b1 d3lrga1  
d4ej1c1 d1rhha1 d1j05b\_ d1forh1 d1q9wb1 d2wzpd\_ d2aq2a1 d1h0da1  
d3revb1 d2ij0c1 d1tzha1 d4m7j11 d1k6ql1 d3b9kc1 d1igml\_ d3qeua1  
d1dsfl\_ d1celh1 d1kcuh1 d1zvha1 d1zvoa1 d1tqbb1 d1ay1l1 d2qsc11  
d2cgrh1 d1nl0h1 d1ken11 d3eo0a1 d4n9ob1 d1n0xl1 d3k1kc\_ d2cqva1  
d1fhga\_ d2k1ma\_ d2dl2a1 d1biha3 d1biha1 d1biha4 d3qp3a1 d1glca\_

d1gxea\_ d1cvsc2 d1cvsc1 d1xmwa2 d1m4ka2 d2otpa2 d1biha2 d1rhfa2  
d2fcba2 d2fcba1 d1wwbx\_ d1gsma2 d1lepfa1 d1lepfa2 d2dava1 d1waaa\_  
d1f97a2 d1x44a1 d1vcaa2 d1fnla2 d1fnla1 d3b5ha2 d3h8na2 d3h8na1  
d1jbjja1 d1jbjja2 d1pd6a\_ d1f2qa2 d1f2qa1 d3cx2a\_ d1nbqa2 d3b5ha1  
d1n26a1 d1xiwb\_ d1xaua\_ d1fltx\_ d2ifga1 d1olla1 d1olla2 d1cs6a4  
d1cs6a3 d1cs6a2 d1cs6a1 d2gw5a2 d1sy6a1 d1xiwa\_ d1lucta2 d1lucta1  
d1ry7b2 d1gl4b\_ d1qz1a3 d1olza1 d2c9aa1 d1wwca\_

**Family-30 (b.40.2.2)**

**Positive dataset contains 6 protein sequences.**

d2aaq2b1 d1v1oa1 d1esfa1 d2g9hd1 d4ohja1 d1ty0a1

**Negative dataset contains 4066 protein sequences.**

d1xfda2 d1m32a\_ d1libja\_ d1c7na\_ d1iuga\_ d4q75a\_ d2bkwa1 d1t3ia\_  
d1qz9a\_ d1jff9a\_ d1leg5a\_ d1p3wa\_ d3kgwa\_ d1cl1a\_ d2ctza1 d1vjoa\_  
d2rfva\_ d1gc0a\_ d1cs1a\_ d1d2fa\_ d2ch1a1 d1qgna\_ d1pffa\_ d1elua\_  
d1u08a\_ d1lc5a\_ d1b5pa\_ d2ay1a\_ d1bw0a\_ d3pd6a\_ d7aata\_ d2csta\_  
d1fg7a\_ d4wlha\_ d1o4sa\_ d1v2da\_ d1gdea\_ d1m6sa\_ d1v72a1 d1svva\_  
d1ajsa\_ d1wsta1 d2f8ja2 d1lk9a\_ d1vp4a1 d1xi9a1 d2gb3a1 d1yaaa\_  
d1xkla\_ d2wfla\_ d3i2ka1 d1lnsa3 d1mpxa2 d1r0ka3 d1j5pa3 d1vkoa2  
d1vm6a2 d3qvsa2 d1p1ja2 d3lgia\_ d3i77a\_ d2z9ia2 d4nsva\_ d1lcya2  
d4jcna\_ d1agja\_ d1os8a\_ d1hpga\_ d1l1ja\_ d1qtfa\_ d1f56a\_ d1bypa\_  
d1lazca\_ d1ws8a\_ d3u25a\_ d1cuoa\_ d1lid2a\_ d1rkra\_ d2iaac\_ d4dp1x\_  
d1nwpa\_ d2gima\_ d2i7sa\_ d1qhqa\_ d3ehbb1 d1fftb1 d1gyca3 d1hfua2  
d1kbva1 d1kbva2 d1sdda1 d1sdda2 d1gyca1 d1gyca2 d1mzya1 d2bw4a1  
d1aoza1 d1aoza3 d1aoza2 d1kyaa2 d1kyaa3 d1kyaa1 d1mzya2 d4e9sa1  
d1sddb1 d1sddb2 d1hfua1 d1hfua3 d1oela2 d1oela1 d1v10a2 d1v10a3  
d1v10a1 d2dara2 d2dara1 d1wyha2 d2dloa2 d1rutx4 d1rutx3 d2cuqa2  
d1x41a2 d1x41a1 d1x3ha2 d1x3ha1 d2d8za1 d1x61a2 d1x6aa1 d1x6aa2  
d2cora2 d2cora1 d1v6ga1 d1v6ga2 d2d8za2 d1x64a1 d1x64a2 d1b8ta1  
d2co8a1 d1x63a2 d2dj7a2 d2dj7a1 d2cu8a2 d2cu8a1 d1g47a2 d1g47a1  
d1j2oa1 d1wyha1 d2dloa1 d1wiga1 d1wiga2 d2cupa2 d2cupa3 d1x68a1  
d2d8ya2 d2d8ya1 d1m3va2 d1x62a1 d1x68a2 d1x61a1 d1b8ta3 d1b8ta2  
d2d8xa2 d2d8xa1 d1x4ka1 d1x4ka2 d2cuqa1 d1m3va1 d2co8a2 d1j2oa2  
d1x63a1 d2cura1 d2cura2 d1x62a2 d1xkta1 d2hfka\_ d1jmkc\_ d5d3ka\_  
d2cfba1 d1dfoa\_ d1o69a\_ d1bj4a\_ d3k28a\_ d2bwpa\_ d3lg0a\_ d2fnua\_  
d3ou5a\_ d1z7da1 d1b9ha\_ d1iaya\_ d4msoa\_ d1bs0a\_ d1s0aa\_ d1sffa\_  
d3tqxa\_ d1mdoa\_ d3qboa\_ d3pgya\_ d2dkja\_ d1ejia\_ d1vefa1 d4wxga\_  
d3bs8a\_ d3gbxa1 d1w23a\_ g1gk9.1 g1or0.1 g1e3a.1 d1iknc\_ d3brda1  
d1p7h11 d1oy3c\_ d1imhc1 d1gjia1 d1zk9a1 d2cxka1 d2bema\_ d1pama1  
d1ea9c1 d1qhoa1 d2fhfa2 d2fhfa1 d1k3ia1 d1j0ha1 d1csla1 d2bhua1  
d1ledqa1 d1f1sa2 d1ut9a2 d1gvia1 d1txka1 d1zx5a1 d2phla2 d2phla1  
d1fxza2 d1fxza1 d1lrha\_ d1uija1 g1dgw.1 d2v09a\_ d1uika2 d1uika1  
d1dgwa\_ d1ogpa1 d1ktja\_ d1ds6b\_ d1fstb\_ d1ex0a1 d4alac\_ d1pjwa\_  
d1s6na\_ d3uzqb\_ d1tafa\_ d1tafb\_ d1jfib\_ d1q9ca\_ d1h3ob\_ d2byka1  
d1n1ja\_ d4g92b\_ d1bh9a\_ d1jfia\_ d1h3oa\_ d2bykb1 d1n1jb\_ d2bjca1

d2hsga1 d1qpza1 d1efaa1 d1ydwa2 d2nvwa2 d1h6da2 d1zh8a2 d1xeea2  
d1t1ta2 d1lau7a2 d1lic8a2 d3gpdg2 d2q49a2 d1hdgo2 d2g17a2 d2cvoa2  
d2czca1 d3pwka2 d1obfo2 d1i32a2 d1zyao2 d2pkqo2 d1b7go2 d2hjsa2  
d1cf2o2 d1vkna2 d1nvmb2 d2msya\_ d2djoa1 d2r5za\_ d1f43a\_ d2lmda1  
d1akhb\_ d1s7ea1 d3nara\_ d1zq3p1 d2craa1 d1mija\_ d4uuta\_ d3a01a\_  
d1x58a1 d3rkqa1 d3cmya1 d2cqxa1 d2da6a1 d1e3oc1 d1fjla\_ d1mh3a1  
d1ig7a\_ d1x41a1 d1wh7a1 d1gt0c1 d2mw8a\_ d1lfup\_ d1x2ma1 d1b72a\_  
d1wi3a1 d1jgga\_ d1wjha1 d1x2na1 d1mnmc\_ d2cuea1 d3k2aa\_ d2hosa\_  
d2jwta2 d1pufa\_ d1ooc1 d2hi3a\_ d1b8ia\_ d4j19a\_ d3lnqa\_ d1wh5a1  
d1b8ib\_ d1fexa\_ d2cqra1 d1guua\_ d1ug2a1 d2cqqa1 d2ajea1 d4a69c\_  
d2crga1 d2iw5b1 d1xc5a1 d1ofcx1 d2cu7a1 d1wgxa1 d2cjja1 d2ckxa1  
d1gvda\_ d1xg1a1 d1itya\_ d1hlva2 d1iufa2 d1iufa1 d2iu5a1 d1zk8a1  
d2g7sa1 d2fd5a1 d2np5a1 d1z0xa1 d2id6a1 d2d6ya1 d2i10a1 d2oi8a1  
d3c07a1 d2ns7a1 d2fq4a1 d2yvea1 d1t33a1 d2o7ta1 d1rcta1 d2np3b1  
d2g7ga1 d2gena1 d2fbqa1 d2g71a1 d2gfna1 d2g3ba1 d2jj7a1 d2hyja1  
d1sgma1 d1ui5a1 d2hkua1 d2id3a1 d4jyka1 d1bl0a1 d1d5ya1 d1d5ya2  
d3lv8a\_ d1s3ga1 d1zaka1 d1s4qa\_ d3tvta2 d1uf9a\_ d1khta\_ d1ckea\_  
d1osna\_ d1p5zb\_ d4tmka\_ d3cm0a\_ d1tmka\_ d1jaga\_ d3h86a\_ d1t0hb\_  
d1nn5a\_ d2h92a\_ d3kb2a1 d2c95a1 d1yj5a2 d1kgda\_ d1ly1a\_ d2ak3a1  
d1vyva2 d1deka\_ d2grja1 d1p3ja1 d1y63a\_ d1e4ya1 d1s96a\_ d3iija1  
d1lvga\_ d1nksa\_ d1vyua2 d4e22a\_ d1qf9a\_ d1jjva\_ d1q3ta\_ d1ki9a\_  
d1lw7a2 d1teva\_ d1gsia\_ d2iyva2 d1kaga\_ d1viaa\_ d1e6ca\_ d1g3ma\_  
d1j99a\_ d1t8ta1 d1nsta\_ d1fmja\_ d1zrha\_ d1ls6a\_ d2a3ra\_ d1aqua\_  
d2zptx\_ d3ckla\_ d1texa\_ d1q44a\_ d2gwha\_ d1odfa\_ d1uj2a\_ d4gi7a\_  
d2jeoa1 d1k6ma1 d1z0ja1 d3umra2 d3gj0a1 d2gaoa1 d1yzga1 d1x3sa1  
d1g7sa4 d1puja\_ d1udxa2 d1kk1a3 d2o52a\_ d1jwyb\_ d1zcaa2 d1zcba2  
d2fv8a1 d2cjwa\_ d3dz8a1 d1xzpa2 d1vg8a\_ d4qxaa\_ d2ew1a1 d1xlra1  
d2bcgy\_ d3doea1 d3cona\_ d3rega\_ d3wyga\_ d1upta\_ d2b6ha1 d1zd9a1  
d1lnza2 d1r5ba3 d1n0ua2 d1r2qa\_ d2f91a1 d2rhda\_ d3q3jb\_ d3q85a\_  
d1efma1 d1r8qa\_ d2gf9a1 d2akab1 d1ek0a\_ d1z08a1 d2gcoa1 d2dyla2  
d4g01b\_ d2cxxa1 d1svia\_ d3q72a\_ d1ni3a1 d4ac9a4 d2erxa1 d2bmea\_  
d1wxqa1 d2gf0a1 d41dja1 d1zunb3 d1d5ca\_ d4lv5b\_ d1efca3 d1kmqa\_  
d2g6ba1 d3lrpa\_ d1tada2 d2y8ea\_ d4rd4a1 d1z06a1 d2heia\_ d3a58b\_  
d1u01a2 d1d2ea3 d1zj6a1 d2ocba\_ d3rwoa\_ d1mr3f\_ d2e9sa1 d4u5xa1  
d2iwra\_ d2fn4a1 d3bwdd\_ d2nzja1 d2atva1 d2ksqa\_ d3l43a\_ d1mkya2  
d1mkya1 d1wmsa\_ d1jnja3 d2rmka\_ d1f6ba\_ d1f60a3 d1gota2 d1jala1  
d2fh5b1 d1g16a\_ d2wblc\_ d1m7ba\_ d1wf3a1 d1f5na2 d1t9ha2 d1z6xa1  
d1z0aa1 d2fg5a1 d2a5ja1 d2bcjq2 d1ky3a\_ d4y0va\_ d4lhwa\_ d2qmea1  
d2atxa1 d1egaa1 d1ryha\_ d1moza\_ d1nrjb\_ d2erya1 d3bfka\_ d1puia\_  
d1fzqa\_ d3j3az1 d3t5ga\_ d1shza2 d3defa\_ d2f7sa1 d3raba\_ d3tsoa\_  
d3aq4a\_ d2a17a1 d3sfva1 d3bc1a\_ d1kb0a1 d1k8ka2 d1k8ka1 d3uleb1  
d3i33a2 d3i33a1 d1bupa1 d1dkgd1 d4ci6a2 d1jcfa1 d4a2ba2 d2fxua1  
d1yaga2 d1yaga1 d4cbua2 d1bupa2 d3vrda1 d3vrda2 d1fcdc2 d1h1oa2  
d1h1oa1 d1m70a2 d1m70a1 d1czan2 d1czan3 d1czan1 d1ig8a2 d1czan4

d1bg3a4 d1bg3a3 d1bg3a2 d1bg3a1 d1hroa\_ d4gedb\_ d3zooa\_ d1mz4a\_  
d1gu2a\_ d1f1fa\_ d1dvva\_ d1c6ra\_ d1c75a\_ d1e29a\_ d1gdva\_ d1cnoa\_  
d1h32b\_ d1co6a\_ d2bh4x\_ d2aiua\_ d5cytr\_ d1jdl\_ d1i8oa\_ d2zboa\_  
d3dmia\_ d1ls9a\_ d1wvec\_ d2yk3a\_ d3ph2b\_ d1dw0a\_ d5aura\_ d1ql3a\_  
d1qn2a\_ d1f1ca\_ d4zzva\_ d2xspa\_ d1eg1a\_ d4v20a\_ d4ipma1 d1gpia\_  
d4csia\_ d3pfza\_ d3ovwa\_ d2yoka\_ d2nqya\_ d1h4ga\_ d1hixa\_ d1oa2a\_  
d1olra\_ d3b7ma\_ d4h7ma1 d3wp3a\_ d2vgda\_ d1igoa\_ d3zsea\_ d2nlra\_  
d3wx5a\_ d1oa3a\_ d1pvxa\_ d1m4wa\_ d1f5ja\_ d1oa4a\_ d1ks5a\_ d4ixla1  
d3sita1 d1evsa\_ d1cnt1\_ d1pvhb\_ d1z7ca\_ d1huwa\_ d1bgea\_ d1rhga\_  
d1f6fa\_ d1f45b\_ d1i1rb\_ d1axia\_ d1etea\_ d3tgxb\_ d1scfa\_ d2z3qa1  
d3qbl\_ d1hula\_ d4nkqb\_ d1eera\_ d1v7mv\_ d5e4ea\_ d2o27a\_ d3b5ka\_  
d2psma1 d4zf7a\_ d3uf5a\_ d4x51a\_ d1d9ca\_ d4ypgc1 d3oq3a\_ d1lqsl\_  
d1n1fa\_ d1aula\_ d1wu3i\_ d3bes1\_ d3ux9a\_ d2ejca\_ d3muea1 d1ihoa\_  
d3q12a1 d4dnxa2 d1v47a2 d1g8fa2 d1jhda2 d1x6va2 d3rbaa\_ d2qtra\_  
d1nupa\_ d3l92a\_ d1qjca\_ d2h29a\_ d1vlha\_ d1od6a\_ d1lw7a1 d1mrza2  
d4ruka\_ d2e17a\_ d1iq0a2 d1irxa2 d1r6ta2 d1ivsa4 d2cyba\_ d1rqga2  
d2yxna\_ d1f7ua2 d1h3fa1 d1ffya3 d2g36a1 d1nzja\_ d1jila\_ d1n3la\_  
d1i6la\_ d1pfva2 d1h3na3 d3n9ia\_ d3sz3a1 d3sw2a\_ d1moxc\_ d1dx5i3  
d1edmb\_ d1autl2 d1autl1 d1nqlb\_ d1dval1 d1szba2 d1kigl\_ d2y5fl\_  
d1ijqa2 d1gk5a\_ d1g1sa2 d1nt0a3 d1xdtr\_ d1lmja2 d1lmja1 d1nzia2  
d2wphe\_ d1klil\_ d1pfxl2 d1pfxl1 d1p9ja\_ d1glta2 d1f7ea\_ d4yzub\_  
d1lr7a1 d1gl4a2 d1m1xb4 d1qx2a\_ d2y5ia\_ d1qlsa\_ d1psra\_ d3n22a\_  
d2egda\_ d4ggfc\_ d2wcea\_ d2luca\_ d4aqia\_ d3nsia\_ d2lp3a\_ d1j55a\_  
d1a4pa\_ d1k8ua\_ d1nsha\_ d3fs7a\_ d2pvba\_ d1ttxa\_ d1rwy\_ d2kyfa\_  
d1rk9a\_ d1a75a\_ d1exra\_ d1tiza1 d1nyaa\_ d1g8ia\_ d1ggwa\_ d1wdcc\_  
d3fwba\_ d1ggza\_ d2o5ga\_ d1ctaa\_ d1m45a\_ d3i5gc\_ d1sl8a\_ d1fpwa\_  
d2scpa\_ d2roaa\_ d4aqra\_ d3pn7b\_ d1br1b\_ d2mysb\_ d1s6ca\_ d1bjfa\_  
d2obha\_ d1jfka\_ d1jf0a\_ d1qv0a\_ d1lkja\_ d2mlfc\_ d2m97a\_ d2d8na\_  
d4by5a\_ d1jbaa\_ d4nqga\_ d1wdcb\_ d2mysc\_ d1j7qa\_ d1s6ia\_ d1uhka2  
d1r2ua\_ d1dtla\_ d3kf9a\_ d3pn7c\_ d1gjya\_ d1y1xa\_ d1hqva\_ d1dvia\_  
d1df0a1 d4usla\_ d1k94a\_ d1wkya2 d1uuqa\_ d3wh9a\_ d4mlra\_ d1xyza\_  
d4xuya\_ d2je8a5 d4bf7a1 d3cuia\_ d1ur4a\_ d1qw9a2 d1odza\_ d2vzsa5  
d1bqca\_ d2x2ya1 d1hjqa\_ d1qnra\_ d4y7ea1 d1vjza\_ d4k68a\_ d2v3ga\_  
d4hpga\_ d1nofa2 d1nq6a\_ d1h4pa\_ d1aq0a\_ d3ziza\_ d4bs0a\_ d1lecea\_  
d1h1na\_ d1ta3b\_ d1w91a2 d1ilwa\_ d1uhva2 d1us3a2 d1legza\_ d7a3ha\_  
d1tvna1 d3nyda1 d1ghsa\_ d2cyga1 d4xv0a\_ d2c8na2 d1w32a\_ d3emca\_  
d1v6ya1 d1foba\_ d2uwfa1 d2fgla\_ d3niya1 d2c0ha1 d1rh9a1 d1yq2a5  
d1szna2 d1fa2a\_ d1pama4 d5do8a1 d1lea9c3 d1hx0a2 d2fhfa5 d1qhoa4  
d1avaa2 d1m53a2 d4m8ua1 d2gjpa2 d1lwha2 d4howa1 d1ktba2 d1j0ha3  
d3vm5a1 d2x1ia\_ d1wzaa2 d1uasa2 d2diea1 d1mxga2 d1ht6a2 d1leswa\_  
d1liv8a2 d5cpsa\_ d1ud2a2 d1zjaa1 d3gbea1 d1kwga2 d1wdpa\_ d1gcya2  
d1g5aa2 d1hvxa2 d3dhp2 d2bhua3 d4do4a1 d3qgva1 d1e43a2 d1g94a2  
d2d3na2 d1gjwa2 d1gvia3 d1x1na1 d1r7aa2 d1tz7a1 glapy.1 d3ljqa\_  
d4toqa\_ d1wb0a1 d1w9pa1 d1eoka\_ d1litxa1 d1kfwa1 d1goia2 d2gsja\_



d1hjxa1 d1jnda1 d1vf8a1 d3wdpp1 d3wq5a\_ d1gnxa\_ d4gxpa\_ d4hz8a\_  
d1e4mm\_ d3aiua\_ d1wcca1 d1qvba\_ d3ahxa\_ d1v02a\_ d2dgaa\_ d1pbga\_  
d1vffa1 d1qoxa\_ d4ha4a\_ d1e5wa2 d1j19a2 d1isna2 d2a16b2 d1g4ma2  
d1lida\_ d2hmta\_ d1lssa\_ d1lix2a\_ d3nvva1 d1krha3 d2h88b1 d1t3qa2  
d1kf6b2 d1zoyb1 d1jq4a\_ d1ffva2 d1dgja2 d1rm6c2 d9ldta1 d2ewda3  
d1up7a1 d2dfda1 d1s6ya1 d1vjta1 d7mdha1 d1hyea1 d1t2da1 d1ojsa3  
d1b8pa1 d1ldna1 d1hyha1 d1civa1 d2a92a1 d1ez4a1 d1i0za1 d1y6ja1  
d1gv0a1 d1ur5a1 d1llda1 d1obba1 d1v8ba1 d1gdha1 d1l7da1 d2dlda1  
d1mx3a1 d1ygya1 d1qp8a1 d1li4a1 d1j4aa1 d1npya1 d3t4ea2 d1a4ia1  
d1o0sa1 d2hk9a2 d2egga2 d1b26a1 d1bvua1 d1gq2a1 d1c1da1 d1leha1  
d1gtma1 d1euza1 d1nvtal d3dona2 d1edza1 d1vi2a1 d1p77a1 d1nyta1  
d1b0aa1 d1vl6a1 d1v9la1 d1txga2 d3f47a1 d1mv8a2 d2pv7a2 d1xc2a3  
d2ahra2 d4xiya1 d2f1ka2 d1pgja2 d1i36a2 d1np3a2 d1l78a4 d1teaa3  
d1qmgga2 d2i76a2 d2g5ca2 d1wdka3 d1dlja2 d3cuma3 d1kola2 d1f8fa2  
d1qora2 d1jqba2 d1vj0a2 d1cdoa2 d1gu7a2 d1d1ta2 d1xa0a2 d2dm6a2  
d1jvba2 d1rjwa2 d1llua2 d1h2ba2 d1tt7a2 d1piwa2 d1o89a2 d1iz0a2  
d1e3ja2 d1yb5a2 d1uufa2 d1vj1a2 d3gpdg1 d1vc2a1 d2nvwal d1u8fo1  
d1ydwa1 d1hdgo1 d2g17a1 d1cf2o1 d2czca2 d1r0ka2 d1lobfo1 d2cvoal  
d1ebfa1 d1h6da1 d1i32a1 d1zh8a1 d2q49a1 d1qkia1 d3pzra1 d1xeea1  
d1vkoa1 d1vm6a3 d3qvsa1 d2pkqo1 d1b7go1 d1gr0a1 d1p1ja1 d1lc0a1  
d1j0xo1 d3pwka1 d2hjsa1 d1zyao1 d1vkna1 d1tltal d1nvmbl d3sjua\_  
d3ojfa1 d1xu9a1 d2jjya1 d1n7ha\_ d1y1pa1 d1h5qa\_ d1jtva\_ d4fs3a\_  
d2bkaa1 d1gy8a\_ d2c5aa1 d1ulsa\_ d1ooea\_ d2b69a1 d1y5ma1 d1spxa\_  
d1aela\_ d1bxka\_ d1ydea1 d1gega\_ d1hdoa\_ d1o5ia\_ d1e6ua\_ d1snya1  
d2rhca\_ d3zv4a\_ d5ceja\_ d2d1ya1 d1fjha\_ d3w8ea\_ d2fmua1 d1x1ta\_  
d1rpna\_ d3ay7a1 d1k2wa\_ d1eq2a\_ d2hrba1 d3ruaa\_ d2ew8a1 d4hwka\_  
d1xgka\_ d2bd0a1 d1yo6a1 d2a35a1 d2ntva\_ d1vl8a\_ d1hdca\_ d4bkua\_  
d2ag5a1 d2q45a\_ d1nffa\_ d4iy1a\_ d1zbqa1 d1kewa\_ d1lek6a\_ d1ja9a\_  
d2q46a2 d1iy8a\_ d1cyda\_ d2ptga\_ d1hxha\_ d1uzma1 d3lyla\_ d4m89a\_  
d3wyea\_ d2blla1 d1w6ua\_ d1sb8a\_ d2q2va\_ d4nr0a\_ d1e6wa\_ d2gasa\_  
d3oiga1 d2bgka1 d1vl0a1 d1rkxa\_ d1r6da\_ d1wmaa1 d1e7wa\_ d2c07a1  
d1xkqa\_ d3tzha\_ d1g0oa\_ d3lz6a\_ d1qyca\_ d1ledoa\_ d1gz6a\_ d1oc2a\_  
d1t2aa\_ d1zema1 d2xoxa\_ d1z45a2 d1geea\_ d1p33a\_ d3lt0a\_ d4e6pa\_  
d2wyua\_ d1db3a\_ d4q9na\_ d1xhla\_ d4o1ma\_ d1fmca\_ d2uvda\_ d2gdza1  
d1uaya\_ d2z1ma\_ d2o23a2 d2fr1a2 d2fr1a1 d1qsga\_ d1qyda\_ d4zjua\_  
d2a4ka1 d1yb1a\_ d1wvga1 d1yxma1 d3f4ba\_ d1mg5a\_ d1xg5a1 d1r55a1  
d3gboa\_ d1atla\_ d1kufa\_ d4q1la\_ d1quaa\_ d1yp1a\_ d1wnia\_ d3nqyb\_  
d4gera\_ d1bqba\_ d1cmxa\_ d1xd3a\_ d3ifwa\_ d1ex0a4 d1g0da4 d2f4ma1  
d1x3za\_ d3ulra1 d1kapp2 d1k7ia2 d1t3ca\_ d1epwa3 d2a97a\_ d3fiea\_  
d3ioqa\_ d1fh0a\_ d1o0ea\_ d1khqa\_ d1m6da\_ d2cb5a\_ g8pch.1 d1s4va\_  
d2pnsa\_ d1vsna1 d1mira\_ d1liwda\_ d2oula\_ d7pcka\_ d3bwka\_ d3bcna\_  
d2p86a\_ d1pvja\_ d1pcia\_ d1gece\_ d1deua\_ d4bs6a\_ d1xkga1 d1cqda\_  
d1jqpa2 d2c0ya\_ d2bdza\_ d3p5ua\_ d2o36a\_ d1ex4a2 d2jk6a2 d2jk6a1  
d1feca1 d1feca2 d1lpfa1 d1lpfa2 d1xhca1 d1xhca2 d1dxla2 d1dxla1

d1gera2 d1m6ia2 d1onfa1 d1onfa2 d3lada2 d3lada1 d1w4xa1 d1w4xa2  
d1gesa2 d1mo9a1 d1xdia1 d1fl2a2 d1fl2a1 d1fcda1 d1fcda2 d1h6va2  
d1h6va1 d1mo9a2 d1gv4a2 d1gv4a1 d2gv8a2 d2gv8a1 d1aoga1 d1aoga2  
d1hyua1 d1ebda1 d1ebda2 d3dk9a1 d1q1ra2 d1q1ra1 d1gesa1 d1zbfa1  
d2z1ha\_ d2etja1 d3qioa1 d2e41a\_ d1j12a\_ d2lsna1 d1lio2a\_ d1uaxa\_  
d2yv0x\_ d1mu2a1 d1lekea\_ d1i39a\_ d1pn0a1 d1reoa1 d1ju2a1 d2f5va1  
d3c96a1 d2gmha1 d1pj5a2 d1gpea1 d1n4wa1 d1k0ia1 d2dw4a2 d2ivda1  
d1seza1 d2voua1 d1kdga1 d1s5ja1 d2hbj2a d2igia\_ d1wlja\_ d1qhta1  
d4dlea1 d1tgoa1 d2f96a1 d3tr8a1 d3mxma\_ d1q8ia1 d1y97a1 d1w0ha\_  
d1kfsa1 d2py5a1 d1noya\_ d1d5aa1 d1yt3a3 d2guia\_ d3mwpa1 d4kbl1a\_  
d1js9c\_ d1f15b\_ d1za7a\_ d1laja\_ d2v76a\_ d1wj1a1 d1aqca\_ d1qqga2  
d1ntva\_ d1n3ha\_ d4dbba\_ d3f0wa1 d1p3ra\_ d1wgua1 d2cy4a1 d3hqca\_  
d1wvha1 d1xr0b1 d1tq5a1 d1wgqa1 d1v89a1 d2coda1 d1zc3b\_ d1wg7a1  
d1u5ea1 d1v61a1 d2coca1 d2ys1a1 d1v5pa1 d1ntya2 d1wjma1 d1wil1a1  
d1u29a\_ d1xx0a1 d1unqa\_ d2zkmx3 d1fhoa\_ d1v88a1 d2adza1 d1x1fa1  
d1p6sa\_ d2coaa1 d1btka\_ d1v5ma1 d1faoa\_ d2x18a\_ d1dyna\_ d1x1ga1  
d4kaxb\_ d2j59m1 d1kilb2 d1xcga2 d1txda2 d1u5da1 d1dbha2 d1wlha\_  
d1upqa\_ d1v5ua1 d1foea2 d2fj1a1 d2dfka2 d2cofa1 d1kz7a2 d1r7ha\_  
d1faaa\_ d1wika1 d1xfla\_ d1ttza1 d2f51a1 d1ti3a\_ d1nhoa\_ d1sena\_  
d2i4aa\_ d1ep7a\_ d1zmaa1 d1fo5a\_ d3lefa1 d3diea1 d2yana1 d1z6na1  
d1oaza\_ d3zywa1 d4aj8a\_ d1nm3a1 d4fiwa\_ d1wmja\_ d4hs1a1 d1iloa\_  
d1xwaa1 d1wjka1 d2vm1a\_ d1fb6a\_ d1gh2a\_ d1h75a\_ d1nw2a\_ d1kx5b\_  
d3a6na\_ d4m6ba2 d2nqbd\_ d3wkjd\_ d2yfw\_ d4h9na\_ d5bnxa\_ d1kx5c\_  
d3r45a\_ d1eqzb\_ d4jjnb\_ d1f66c\_ d1eqza\_ d4wnnb\_ d1kx5a\_ d1u35c1  
d1id3a\_ d2nqbc\_ d1kx5d\_ d2b5ea2 d2b5ea3 d2b5ea1 d2b5ea4 d2kp1a1  
d2kp2a1 d1hyua3 d1hyua4 d1j08a1 d1pd212 d1nhya2 d2a2ra2 d1k0dd2  
d1f2ea2 d1gsua2 d1f3ba2 d2fhea2 d2pvqa1 d1tw9a2 d1oyja2 d1e6ba2  
d1k0ma2 d3ik7a1 d4is0a1 d1r5aa2 d1jlva2 d1m0ua2 d3gtub2 d1z9ha2  
d1okta2 d1axda2 d2gsra2 d1tu7a2 d1k3ya2 d1zgma1 d1b48a2 d1gnwa2  
d1gwca2 d2gsta2 d1glqa2 d1oe8a2 d1pn9a2 d1v2aa2 d1fw1a2 d1duga2  
d1a0rp\_ d1dszb\_ d1a6ya\_ d3cbba\_ d1ynwa1 d1r4ia\_ d1hcqa\_ d2hana\_  
d2hanb\_ d2enval d1kb4b\_ d2n1lb\_ d1lola\_ d1qqya\_ d1gd6a\_ d1f6ra\_  
d1ivma\_ d2gv0a\_ d1iiza\_ d2z2fa\_ d1j8xa\_ d1ghla\_ d1b9oa\_ d1741a\_  
d1691a\_ d2o4wa\_ d1p37a\_ d1k28a3 d1xjta1 d1jtma\_ d2f2qa\_ d4e97a1  
d1iyka2 d1iyka1 d1rxta1 d1iica2 d2za0a\_ d2c21a1 d1f9za\_ d2pjsa1  
d1klla\_ d2i7ra1 d1ecsa\_ d1xqaa1 d5cj3a1 d1jifa\_ d2p7oa\_ d1r9ca\_  
d1nkia\_ d1kw3b2 d1kw3b1 d4ghga1 d1tfza1 d3isqa1 d3isqa2 d1sqia1  
d1sqia2 d1lkda2 d1lkda1 d1mpya1 d1cjxa2 d1cjxa1 d1sp9b2 d1t47a1  
d1t47a2 d1flua2 d1sp8a1 d1sp8a2 d1flua1 d3ia2a\_ d1a88a\_ d4dgqa1  
d1hkha\_ d1zoia\_ d1ro5a1 d1pv8a\_ d1w5qa\_ d2c1ha\_ d1ohla\_ d1l6sa\_  
d1qsta\_ d2beial d4m3sa\_ d1u6ma1 d1yk3a1 d3dr6a\_ d1xmta\_ d1z4ea1  
d2ge3a1 d1bo4a\_ d2fiaa1 d2jdca1 d1y9wa1 d3to7a\_ d1wwza1 d2fl4a1  
d2ozua1 d2b5ga\_ d2cy2a1 d2p0wa\_ d1cm0a\_ d4pswa\_ d1yrea1 d1yr0a1  
d1m4ia\_ d2gana1 d1yvka1 d1ghea\_ d2g3aa1 d1y7ra1 d2eulia1 d1q2ya\_

d2fsra1 d1xeba\_ d2ae6a1 d1cjwa\_ d1qsma\_ d2aj6a1 dly9ka1 dli12a\_  
d1vkca\_ d2atra1 d1n71a\_ d2d4pa1 d2fiwa1 d2fe7a1 dltiga1 d2ou2a\_  
d1yx0a1 d2fcka1 d1p0ha\_ d2j8ma\_ d2pq8a\_ d1z4ra1 d1s3za1 d1ufha\_  
d1ax4a\_ d1c7ga\_ d2v1pa1 d2ez1a\_ d1xvqa1 d3hy2a\_ d2cvba1 d1o8xa\_  
d1lu4a\_ d1we0a1 d2bmx1 d2a4va1 d1psqa\_ d1xiya1 d1q98a\_ d1n8ja\_  
d1zofa1 d2ggta\_ d3tjja\_ d4je1a1 d1o73a\_ d3s9fa\_ d2zcta\_ d1qmva\_  
d1jfua\_ d2b1ka\_ d5dvba1 d2b5xa1 d2v2ga\_ d1st9a\_ d3tb2a\_ d4llra\_  
d4fh8a1 d1e2ya\_ d1knga\_ d2h30a\_ d1i5ga\_ d2z9sa\_ d2f8aa1 d1tp9a1  
d2b7ka\_ d1nm3a2 d3hvva\_ d2wfca1 d4kcea\_ d1xvwa1 d4gqca1 d3qpma\_  
d4k1fa\_ d1zzoa1 d1gp1a\_ d1prxa\_ d4od7a1 d1z6ma1 d4mcua1 d4dvca1  
d1r4wa\_ d3l9sa\_ d1un2a\_ d3rppa\_ d1e88a1 d1l6ja5 d1l6ja4 d1eaka4  
d1eaka3 d1l6ja3 d1h8pa2 d1h8pa1 d1ys1x\_ d4hs9a\_ d1ispa\_ d1ex9a\_  
d3qmma\_ d1bn1a\_ d1c4xa\_ d2rhwa\_ d2ftba\_ d1pmpa\_ d2rcqa1 d1fdqa\_  
d4lkpa\_ d1sa8a\_ d1vyfa\_ d1lpja\_ d3vg7a1 d4azqa1 d5bvqa\_ d1p6pa\_  
d2qo4a\_ d1opba\_ d1yiva1 d1o1va\_ d4bvma1 d4tkba\_ d4i3ba\_ d1bwya\_  
d1ftpa\_ d1ggla\_ d4gkca\_ d1cbia\_ d3p6da1 d1kqwa\_ d2a0aa1 d3zxha\_  
d1cgl1a\_ d1rm8a\_ d1eaka2 d1hy7a\_ d2jsda\_ d1cxva\_ d1hv5a\_ d1i76a\_  
d1gl2a\_ d3p0ya1 d1igra1 d1igra2 d1n8yc2 d1n8yc1 d1m6ba2 d1m6ba1  
d2bk7a\_ d3fjua\_ d1z5ra1 d1kwma1 d1uwya2 d1jqga1 d2c1ca1 d1dtda\_  
d1h8la2 d1h6ta2 d1h6ua2 d2tbvc\_ d1c8nc\_ d1x36a\_ d1smvc\_ d1ng0c\_  
d4sbvc\_ d1lopa\_ d1cixa\_ d1y29a\_ d1v7fa\_ d2jtba\_ d1d1ha\_ d1g9pa\_  
d1lupa\_ d1qk7a\_ d1mb6a\_ d2a2va\_ d1niya\_ d1i25a\_ d1hvw1 d2mpqa\_  
d1ie6a\_ d1kqha\_ d1la4a\_ d2mxoa1 d1d10a\_ d1koza\_ d1qk6a\_ d1emxa\_  
d1lqra\_ d1c6wa\_ d1rmka\_ d1ixta\_ d1eyoa\_ d1cna1 d1fu3a\_ d1gl1pa\_  
d1f3ka\_ d1rypd\_ d1irua\_ d1rypc\_ d3unfk\_ d1rypa\_ d1j2pa\_ d1irui\_  
d1j2qh\_ d3unfh\_ d1m4ya\_ d1rypb\_ d1irul\_ d1irug\_ d1iru2\_ d1q5rh\_  
d1rypg\_ d1g3ka\_ d1iruf\_ d1q5qa\_ d1e94a\_ d1irub\_ d1ryph\_ d3ty6a\_  
d1iruj\_ d1iruk\_ d1rype\_ d1irud\_ d1irue\_ d3mi01\_ d1rypf\_ d2z3ba\_  
d1iruc\_ d3mka2\_ d1irul\_ d1ny722 d1a6ca3 d1a6ca2 d1a6ca1 d1pg122  
d1pg121 d1pg111 d1ny711 d1mqta\_ d1d4m3\_ d1fmd3\_ d2mev1\_ glaym.1  
d1ev13\_ d4q4w1\_ d1r1a3\_ d2x5ia\_ d1rhi1\_ g1r1a.1 g1d4m.1 g1rhi.1  
d1b35b\_ d1lopa\_ d1tme1\_ d4iv1a\_ g1pvc.1 g1fpn.1 d1fpn1\_ d4gb31\_  
d1d4m1\_ d1fmd1\_ d2wzr3\_ g1cov.1 d1qqp3\_ g1fmd.1 d2x5ic\_ d1rhi3\_  
g1oop.1 d1hxs1\_ g1hxs.1 d1fpn3\_ d1bev1\_ g2mev.1 d1eah3\_ d1aym1\_  
d1pvc3\_ d1qqp1\_ d1zba3\_ d1h8ta\_ d3vbhc\_ g1b35.1 g1bev.1 d1hxs3\_  
g1ev1.1 d1bev3\_ g1tmf.1 d1tmf1\_ d1b35a\_ d2mev3\_ g1eah.1 g1h8t.1  
d1eah1\_ d4q4w3\_ d1r1a1\_ d1aym3\_ d1pvc1\_ d1zba1\_ d1h8tc\_ d1loopc\_  
d1tme3\_ g1qqp.1 d4iv1c\_ g1tme.1 d1y14b1 d2nn6i1 d1i941\_ d2zjra2  
d1smxa\_ d2qamc2 d1hh2p1 d2r7da1 d1rl2a2 d1wfqa1 d3bzka4 d1x6oa2  
d3a0ja\_ d2j01d2 d2ja9a1 d4q15a\_ d1hr0w\_ d1luza\_ d2n3sa\_ d2vnud1  
d1h95a\_ d1go3e1 d2nn6h1 d1ne3a\_ d2mola\_ d1iz6a2 d1jjga\_ d1e3pa2  
d2ix0a3 d2ix0a2 d2lxja\_ d1ueba3 d1ueba2 d2z0sa1 d1u0la1 d2ix0a1  
d2eifa2 d2je6i1 d3i2za1 d2c35b1 d2ahob2 d1t9ha1 d3i4oa\_ d2qall1  
d1jt8a\_ d2nn6g1 d1g6pa\_ d3cama\_ d1i94q\_ d1d7qa\_ d2ba0a1 d2vnud2

d2vnud3 d1khia2 d2qalq1 d1wi5a1 d1xtda2 d1ny4a\_ d4w9ta\_ d4x2ra1  
d1ka9f\_ d1qo2a\_ d4axka1 d1thfd\_ d1h5ya\_ d4u28a\_ d2y88a\_ d4wd0a\_  
d1vzwa1 d1eixa\_ d3exra\_ d2ffca1 d2fdsa1 d3n3ma1 d2czda\_ d1q6oa\_  
d2yyua\_ d1vqta1 d1dbta\_ d3ldva1 d3syxa1 d1mkea1 d2p8va\_ d1xoda1  
d1i7aa\_ d1evha\_ d1legxa\_ d1prtb2 d2r80b\_ d1cqxa1 d1cg5a\_ d1gcvb\_  
d3boma\_ d2h8fb\_ d2raoa\_ d3bj1a\_ d4hrrb\_ d2r50a\_ d3d1kb\_ d2aa1b1  
d3zhwa\_ d3hf4b\_ d3gdja\_ d1jebb\_ d3bj1b\_ d1x9fb\_ d1wmub\_ d1gcva\_  
d3bcqb\_ d3d4xb\_ d1gvha1 d2dc3a\_ d3hf4a\_ d4yu3a\_ d3k8ba\_ d1qpwb\_  
d2r80a\_ d3bcqa\_ d1v4wa\_ d3wtgb\_ d1j17a\_ d4esaa\_ d1a9we\_ d3d1ab\_  
d4h21a\_ d1v4wb\_ d1mwca\_ d1vhba\_ d1jeba\_ d1spgb\_ d1h97a\_ d1q1fa\_  
d1tu9a1 d3d1aa\_ d1hdsb\_ d3hyub\_ d2zfb\_ d3fs4a\_ d1oj6a\_ d1shrb\_  
d4h21b\_ d4yu3b\_ d1spga\_ d3hrwa\_ d3qqra\_ d3at5a\_ d4wchd\_ d3hyua\_  
d1cg5b\_ d1uc3a\_ d1hbra\_ d2raob\_ d1outb\_ d4esab\_ d3gdjb\_ d3qqqa\_  
d1x9fc\_ d3vrfa\_ d1litha\_ d3mkba\_ d3d4xa\_ d3mjpa\_ d1j16a\_ d3fh9a\_  
d1outa\_ d2dc3b\_ d1it2a\_ d3eoka\_ d3g46a\_ d1qpwa\_ d3vrfb\_ d1ch4a\_  
d1x9fd\_ d1hdsa\_ d2zfb\_ d3mkbb\_ d1or4a\_ d3wtga\_ d1a4fa\_ d3fh9b\_  
d3bomb\_ d3cy5a\_ d3at5b\_ d1x9fa\_ d2oifa\_ d4lmb\_ d1cpcb\_ d3v57a\_  
d1kn1a\_ d1cpca\_ d4f0ta\_ d2vjha\_ d4po5b\_ d1eyxa\_ d1alla\_ d4f0tb\_  
d1b33b\_ d1b8db\_ d4h0mb\_ d2vjhb\_ d4l6b\_ d2vmlb\_ d1a11b\_ d2vjta\_  
d3dbja\_ d2vmla\_ d2vjtb\_ d4f0ub\_ d1f99b\_ d4rmpa1 d1liaa\_ d1eyxb\_  
d2uulb\_ d4lmsb\_ d4f0ua\_ d2bv8a\_ d1f99a\_ d2bv8b\_ d2c71b\_ d3dbjb\_  
d4rmpb1 d1b8da\_ d4h0ma\_ d3v57b\_ d1kn1b\_ d1liab\_ d2uula\_ d2j96a\_  
d1f00i3 d1azwa\_ d2xqfa\_ d1ea5a\_ d1f6wa\_ d1dx4a\_ d1qe3a\_ d1k4ya\_  
d4qwwa\_ d2ha2a\_ d1r88a\_ d1sfra\_ d4qeka\_ d3c8da2 d2pbla1 d1jkma\_  
d1jjia\_ d1lzl\_ d1jjfa\_ d1gl9b1 d1gkub2 d2qvba\_ d2v9za\_ d4kafa1  
d2m5ta\_ d1wqsa\_ d5bpea\_ d2ipha\_ d1lvoa\_ d2bhga1 d3tnta\_ d3sjia\_  
d3d23a1 d2fyqa\_ d3tloa\_ d3zvea1 d2hrva\_ d3q3ya1 d4asha1 d1jmxa4  
d1jmxa3 d1pbya4 d4iuua3 d4bvva\_ d5hpga\_ d3k65a\_ d1ki0a3 d1ki0a1  
d1a0ha1 d1pmla\_ d3sp8a3 d2feba1 d1f74a\_ d3l21a\_ d2e1da\_ d1to3a1  
d1w3ia\_ d1sfla\_ d1n7ka\_ d1vcva1 d4ime\_ d1wa3a\_ d2ocza1 d1f2ja\_  
d3m16a\_ d2yxga\_ d1ub3a\_ d3a5fa\_ d1fbaa\_ d1l6wa\_ d1xfba1 d1wx0a1  
d1vpxa1 d1ojxa\_ d1mxsa\_ d2a4aa1 d1xkya1 d3cq0a1 d3s1xa\_ d1f05a\_  
d1fdja\_ d3cpa1 d4d2ja\_ d1cg2a1 d1yloa2 d1y7ea2 d1y0ya3 d1l1fwa1  
d1vixa1 d1fnoa4 d1vhoa2 d1ysja1 d1vhea2 d1z21a1 d2fvga2 d1r3na1  
d2grea2 d1xmba1 g1q71.1 d1rtqa\_ d3rp2a\_ g1lucy.1 d1fuja\_ d2zchp\_  
d3w94a\_ d1si5h\_ d1lo6a\_ g2pka.1 d1cgha\_ d1kigh\_ d1a5ia\_ d3s9ba\_  
d1hj8a\_ d1ao5a\_ d2anya\_ d1q3xa1 d1gvza\_ d1azza\_ d4gsoa\_ d2f91a1  
d1liaua\_ d1gdna\_ d1eufa\_ g1fiw.1 d1eq9a\_ d4nfea\_ d2rdla\_ d1spja\_  
d1elva1 d1a7sa\_ d1ekbb\_ d1yc0a\_ d2aiqa\_ g1fiz.1 d1fi8a\_ d4k60a\_  
d4dgja\_ d1mzaa\_ d1op0a\_ d3tjva\_ d1pytd\_ d1sgfg\_ g1gg6.1 d2eeka\_  
g1rtf.1 d1a0ja\_ d3g01a\_ d1pytc\_ d4e7na\_ d1ddja\_ d1z8ga1 d2hlca\_  
d1npma\_ d1brup\_ g1jou.1 d1sgfa\_ d1autc\_ g2hnt.1 g1kdq.1 d1orfa\_  
d3s69a\_ d4crga\_ d1fxya\_ d1bqya\_ d1svpa\_ d1mbma\_ d3su6a1 d1cula1  
d4agka\_ d1vcpa\_ d1q31a\_ g1n11.1 d3e90b\_ d3u1jb\_ d1dzka\_ d4tlja\_

d2a2ua\_ d4wfva\_ d3t1da\_ d4iaxa\_ d3zq3a\_ d2nnda\_ dli4ua\_ d1kxoa\_  
d1bbpa\_ d1kt7a\_ d1exsa\_ d3s26a1 d1lf7a\_ d1qfta\_ d4gh7a\_ d1z24a1  
d1qabe\_ d1xkia\_ d1ew3a\_ d3bx7a\_ d4iawa1 d1n0sa\_ d1gkab\_ d3kzaa\_  
d2k23a\_ d2l9ca1 d2joza1 d1gm6a\_ d3kffa\_ d3saoa1 d1e5pa\_ d1yupa1  
d1iiua\_ d4lu0a\_ d1of8a\_ d3unda1 d3e9aa1 d1vr6a2 d1n8fa\_ d2qkfa\_  
d1d9ea\_ d1e69a\_ d1mv5a\_ d3g60a4 gl1i8.1 d1ewqa2 d1ji0a\_ d1qhla\_  
d1v43a3 d2wmfa1 d1vp1a\_ d1g2912 d4a82a2 g1f2t.1 d2d62a1 d3tuic1  
d2bbsa1 d3g60a3 d2ixea\_ d1g6ha\_ d1sgwa1 d2qi9c\_ d3rlfa1 d3b60a1  
d3d31a2 d2pzea1 g1xew.1 d1jj7a\_ d1oxxk2 d2onka1 d1wlwa\_ d1iwea\_  
d1qf5a\_ d1vmaa2 d1nija1 d1np6a\_ d2p67a1 d3ihla\_ d1okkd2 d1ls1a2  
d1slma2 d1liona\_ d2v40a\_ d3hida\_ d2vo1a1 d2g0ta1 d1vcoa2 d1j8mf2  
d1g3qa\_ d1xjca\_ d1p9ba\_ d1qzxa3 d1ihua2 d1ihua1 d2qm8a\_ d1dj2a\_  
d4ioja\_ d1cp2a\_ d1yrba2 d1hyqa\_ d3gqba2 d1skye3 d1xp8a1 d1tf7a2  
d1tf7a1 d1ye8a1 d1skyb3 d2qe7d2 d4blta\_ d4huta\_ d3l1daa2 d4hyya\_  
d2i3ba1 d1cr1a\_ d3j9tb2 d3ntua2 d1vdza1 d2z43a\_ d1e9ra\_ d1nlfa\_  
d3ziaa2 d1n0wa\_ d1g6oa\_ d3ziad2 d3j9ta2 d1pzna2 d3gqbb2 d2i49a\_  
d1nnfa\_ d1xvxa\_ d1ursa\_ d1h3da1 d1iuda\_ d4mlva1 d1twya\_ d3e13x\_  
d2nxoa1 d4pfua\_ d3ttma\_ d1elja\_ d2qmw1 d1us5a\_ d1y3na1 d1jeta\_  
d1uqwa\_ d4f19a1 d2esna2 d3thia\_ d3fasa1 d2uyeb\_ d2xwva1 d1r91a\_  
d2fyia1 d1pb7a\_ d2ozza1 d1sw5a\_ d1nh8a1 d1vr5a1 d2g29a\_ d1xs5a\_  
d3lswa\_ d2z23a\_ d3w9va\_ d3tcha\_ d1q35a\_ d1z7me1 d3q27a\_ d1p99a\_  
d1ve4a1 d2i6ea1 d4mcoa1 d4n8ya\_ d1eu8a\_ d1zbma1 d1hsla\_ d1ixca2  
d1j1na\_ d1xvya\_ d1y9ua\_ d2z22a1 d1xoca1 d4oera\_ d1wdna\_ d5f1qa1  
d1xt8a1 d1i6aa\_ d4gwoa\_ d4igta1 d1pc3a\_ d4mmpa1 d1o63a\_ d2cz1a1  
d2onsa2 d4mija1 d4ok5a1 d2bmfa1 d2bmfa2 d1yksa1 d1yksa2 d1jr6a\_  
d2qeqa1 d2jlqa1 d1a1va2 d1eh3a\_ d3skpa\_ d1dtza2 d1lieja\_ d1jnfa2  
d1ce2a1 d1jnfa1 d1b1xa2 d1b1xa1 d1jw1a1 d1jw1a2 d1ryoa\_ d1h76a1  
d1h76a2 d1c4oa1 d2p6ra3 d2p6ra4 d1oywa2 d1oywa3 d1wrba1 d1w36b2  
d1w36b1 d1c4oa2 d3bora\_ d1t6na\_ d2eyqa5 d2eyqa3 d2eyqa2 d2zu6a2  
d1veca\_ d1uaaa1 d1w36d1 d2g9na1 d1z3ix2 d2rb4a\_ d1hv8a1 d1hv8a2  
d1t5ia\_ d1w36c2 d2j0sa2 d2j0sa1 d1fuka\_ d3hjha1 d1z5za1 d1qdea\_  
d1z63a1 d1s2ma2 d1s2ma1 d1wp9a1 d1wp9a2 d1gm5a3 d1gm5a4 d3dina4  
d3dina3 d1q0ua\_ d1w36c1 d1z3ix1 d1nkta3 d1nkta4 d1w36d2 g1qhh.1  
d2fwra2 d2fwra1 d2v8ta\_ d3q3ma\_ d1za0a1 d1mxra\_ d2inca\_ d1jk0a\_  
d2incb\_ d1mhyb\_ d3hf1b\_ d1mtyb\_ d1r2fa\_ d2uw1a\_ d1mhyd\_ d3n37a\_  
d1afra\_ d1loquc\_ d1syya\_ d1mtyd\_ d2olza\_ d1uzra\_ d1smsa\_ d2fkza\_  
d1zujal d1s3qa1 d2fjca1 d1z6om1 d1veia\_ d4dyya\_ d1jiga\_ d3gvya\_  
d2pyba\_ d4cy9a1 d3bvfa1 d1r03a\_ d2cf7a\_ d1nf4a\_ d1zs3a1 d4iwka\_  
d3ka8a\_ d3np0x\_ d1n1qa\_ d1lb3a\_ d4e6ka\_ d1z6oa1 d2fzfa1 d4dyua\_  
d3ge4a\_ d1jgca\_ d4am4a\_ d2z6ma\_ d1ji5a\_ d1vlga\_ d1lkoa1 d1krqa\_  
d3qz3a\_ d1o9ra\_ d2ffxj\_ d1euma\_ d1yv1a1 d2v2pa\_ d1j30a\_ d4di0a\_  
d1dpsa\_ d2cbia2 d1gqia1 d2choa2 d1oewa\_ d2qzxa\_ d2asia\_ d1psoe\_  
d1miqa\_ d1smra\_ d2h6ta\_ d1pfza\_ d1lizda\_ d3hd8a\_ d1dpja\_ d4aa9a\_  
d1t6ex\_ g1b5f.1 g1lya.1 g1htr.1 d1qdma2 d1bxoa\_ d1wkra\_ d1tzsa\_

d1libqa\_ d2qzwa\_ d1bdqa\_ d3ggta\_ d3ixoa\_ d1mrxa\_ d2haha\_ d1tw7a\_  
d4njjsa\_ d1sgua\_ d2p3da\_ d1nsoa\_ d3d3ta\_ d2rkfa\_ d1c6ya\_ d2rspa\_  
d3ogpa\_ d3ekwa\_ d2o4na\_ d2j9ja\_ d1baia\_ d3ggua\_ d3lzua\_ d4npua\_  
d4j55a\_ d2r8na\_ d2fxda\_ d2p3ca\_ d4dqea\_ d3ttpa\_ d3t3ca\_ d2p3aa\_  
d2hc0a\_ d2fdda\_ d3mwsa\_ d1wgra1 d1ef5a\_ d1wfy1 d1e8ya3 d1wgya1  
d1l1fa\_ d2cs4a1 d1wxma1 d2byea1 d3kh0a1 d2byfa1 d1wxaa1 d1e7ua3  
d1h4ra3 d4y18a1 d2a16a3 d1l7ya\_ d1wgda1 d1wgg1 d4q5eb\_ d1wjna1  
d1se9a\_ d3n3kb\_ d1wz0a1 d1we6a1 d2m0xa\_ d2gbka\_ d3rt3b1 d1wh3a1  
d1sifa\_ d2ekek2 d4ii2b1 d4hk2a1 d1c3ta\_ d1m94a\_ d1wgha1 d1ttna1  
d1j8ca\_ d1wx8a1 d3v6cb1 d2ma9b\_ d4i61b1 d1bt0a\_ d2jvca1 d1iyfa\_  
d2k1fa\_ d1wxva1 d1wf9a1 d1t0ya\_ d2io0b2 d1x1ma1 d2gbma\_ d1zw7a1  
d2m17a\_ d1ud7a\_ d1we7a1 d2l1wa\_ d2gbja\_ d1wjua1 d1v6ea1 d1v86a1  
d4eewa\_ d1w1aa1 d4icva\_ d4gu2a\_ d1wx7a1 d1wy8a1 d4hjka1 d2faza1  
d1v5oa1 d1g66a\_ d1qoza\_ d5ajha1 d2h0ba\_ d2erfa\_ d1h30a2 d3mw4a1  
d1pz7a\_ d2r1ba\_ d3v64a1 d1d2sa\_ d3bopa1 d3mw3a1 d1okqa1 d1okqa2  
g1y43.1 d1um8a\_ d1ixza\_ d1qvra2 d1qvra3 d1sxjc2 d1jr3d2 d2p65a\_  
d1l8qa2 d1g8pa\_ d3hu3a3 d1sxjd2 d1njfa\_ d1in4a2 d1sxja2 d1tuea1  
d2ce7a2 d1w5sa2 d1sxjb2 d1d2na\_ d1ny5a2 d1ofha\_ d2gnoa2 d2a5yb3  
d1fnna2 d1u0ja1 d1l1v7a\_ d1iqpa2 d2fnaa2 d1ixsb2 d4gita\_ d1sxje2  
d1g41a\_ d2e3fa\_ d1mm0a\_ d2e3ea\_ d2l1da\_ d2ny8x\_ d2e3ga\_ d2ny9x\_  
d2nz3a\_ d2l1j7a\_ d1n4na\_ d2m8bb1 d2kyqa\_ d3psma\_ d1jkza\_ d1jxca\_  
d2g11a\_ d4uj0a\_ d2k4ua\_ d2lu9a\_ d1baha\_ d2meoa1 d1wm7a\_ d1h1ya\_  
d1n8ma\_ d1jlza\_ d1wpda\_ d1c55a\_ d1pvza\_ d1wt7a\_ d1rjia\_ d1wz5a\_  
d1m2sa\_ d1pjva\_ d1c49a\_ d1qkya\_ d2ktca1 d1wmta\_ d1du9a\_ d1j5ja\_  
d1r1ga\_ d1t0za\_ d2i61a\_ d1t1ta\_ d1sn4a\_ d1kv0a\_ d2l1kba\_ d1npia\_  
d1wwna\_ d1pe4a\_ d2kbka\_ d2li7a\_ d1djta\_ d2kbha\_ d1dq7a\_ d1sega\_  
d1omya\_ d1zywa1 d1jzaa\_ d2jca\_ d1n9wa1 d1bbua1 d1e1oa1 d1c0aa1  
d1l0wa1 d3a74a1 d1eova1 d1ixra2 d1iyjb4 d1iyjb5 d1iyjb3 d1o7ia\_  
d4ipca1 d1x3ea\_ d4apva\_ d1jb7a1 d1jb7a2 d1jb7a3 d3kdfa\_ d1ue1b\_  
d1wjja1 d3eiva\_ d1xjva2 d1xjva1 d2ccza2 d1se8a\_ d1l1loc\_ d1jb7b\_  
d1qvca\_ d3ulla\_ d1qzga\_ d1miua4 d1miua5 d1miua3 d3g48a1 d1gd7a\_  
d1mkha\_ d1pyba\_ d3ubub\_ d1legia\_ d1qo3c\_ d1v7pa\_ d1tdqb\_ d3ubua\_  
d1c3ab\_ d1h8ua\_ d3bx4b\_ d1t8ca1 d1sb2a1 d1qdda\_ d2ziba1 d3cada\_  
d1byfa\_ d1j34b\_ d1jwia\_ d1jzna\_ d1c3aa\_ d1oz7b\_ d1wmza\_ d3bdwb\_  
d1hq8a\_ d1fifa1 d3hupa\_ d1wk1a1 d1umra\_ d2afpa\_ d3bx4a\_ d1gz2a\_  
d1s16a\_ d1v7pb\_ d3g8ka\_ d1ixxa\_ d1j34a\_ d1jwib\_ d1g1sa1 d1y17a1  
d1ja3a\_ d1fvub\_ d3bdwa\_ d1sb2b1 d1fvua\_ d1umrc\_ d1oz7a\_ d4m17a\_  
d3cfwa1 d1ypqa1 d1g1ta1 d3fd4a\_ d3l9jc\_ d4dn8a1 d1v41b\_ d1rd11\_  
d2msba\_ d1dgsa2 d1fvia1 d1p16a1 d1x9na2 d1pfsa\_ d2a1ka\_ d1je5a\_  
d1rpma\_ d2shpa1 d1yfoa\_ d1l8ka\_ d2ooqa1 d1g4us2 d1p15a\_ d1lara2  
d1lara1 d1wcha\_ d2fh7a2 d2fh7a1 d1ohea1 d1ohea2 d2f4da\_ d1rxda\_  
d2hxpa\_ d1xria\_ d1d5ra2 d1fpza\_ d3ezza\_ d4y2ea\_ d3azya\_ d3wvja\_  
d1upsa1 d1ajoa\_ d2hyka\_ d2vy0a\_ d1o4ya\_ d3o5sa\_ d3d6ea\_ d3atga\_  
d1dypa\_ d1umza\_ d3i4ia\_ d1c11a\_ d4l1bqa\_ d1a78a\_ d1slta\_ d4no4a\_

d3zsja\_ d3duia\_ d1g86a\_ d1is3a\_ d1qmja\_ d1hlca\_ d1tdha3 d1q3ba3  
d1ee8a3 d1k82a3 g1qmo.1 g1len.1 d3zyra\_ d1fnva\_ d1n47a\_ g21tn.1  
d1avba\_ d3usua\_ d1dhkb\_ d1f9ka\_ d1lukga\_ d1g8wa\_ d1g9fa\_ d1wbfa\_  
d3wcsa\_ d1g7ya\_ g1loe.1 d1mvqa\_ d1hqla\_ d1v6ia\_ d1dbna\_ d1qnwa\_  
d1fx5a\_ d4l8qa\_ d1ioaa\_ d3n35a\_ d3h33a\_ d1rwja\_ d19hca\_ d1os6a\_  
d3bxua\_ d3h4na\_ d1i77a\_ d3caoa\_ d1j0pa\_ d2ctha\_ d1duwa\_ d2e84a\_  
d1hh5a\_ d1gyoa\_ d3h34a\_ d1wioa4 d1ccza2 d1vcaa1 d1dr9a2 d2d9qb1  
d2nxyb2 d1adqa1 d1fnga1 d1uvqb1 d1zs8a1 d2vola1 d2vola2 d1mfb12  
d2jelh2 d1uwel2 d3qq4b1 d1kjob\_ d1k5na1 d1osph2 d4odh12 d1ow0a1  
d1ow0a2 d1bfob2 d3l9ra2 d3jtth1 d2fath2 d4elkb2 d1fn4b2 d2xfxb\_  
d1pg7x2 d1cqka\_ d4k71b2 d1lk2a1 d1eapb2 d4lfhg2 d1i4fa1 d2nw2a2  
d1kfah2 d1mhca1 d1h3ua1 d1wejh2 d1h0db2 d1a5fh2 d1kcvh2 d1mjuh2  
d1qqda1 d1kcrh2 d1k8ia1 d3huja2 d2nnab1 d1nfd2 d3mffb2 d1s9va1  
d1lk3h2 d1q0x12 d1fv1b1 d1neza1 d4rfeb2 d1r3ha1 d1a6tb2 d1kjva1  
d1pz5b2 d1onqa1 d2bc4a2 d1de4a1 d1k8da1 d1tcra2 d1dn0b2 d1nfde2  
d2xwtb2 d1bfoa2 d1mexh2 d1iakb1 d1ypzf2 d4f7ea2 d1q72l2 d2fbjh2  
d1fe8h2 d1clzh2 d1fngb1 d1uvqa1 d1vgka1 d1c16a1 d4j12a2 d4x99b2  
d1igtb3 d1je6a1 d1q72h2 d1nldh2 d1teth2 d2hmic2 d1ilca2 d1ilca1  
d1k8ib1 d1q0yh2 d1kfa12 d3frua1 d1pg7w2 d1u58a1 d1igyb4 d1igyb3  
d1hyrc1 d1klub1 d1deeb2 d1c12b2 d2bc4b2 d2ig2h2 d1kcvl2 d3wn5b1  
d1lk2b\_ d1lk3l2 d1mjul2 d1sm3h2 d1q0xh2 d1zvsa1 d1ydpal d1u8ib2  
d1ypze2 d1kcuh2 d1op9a\_ d1y0la1 d1etzb1 d1egj11 d2gsib1 d1nj9a1  
d4jfhdl d1aqkl1 d1t2ja\_ d1lo4h1 d1zvya1 d3v4vl1 d4enec1 d1kxtb\_  
d5e8ea1 d2pxya\_ d4weud\_ d1xiwc\_ d2esvd1 d1qnzh\_ d1ogae1 d1f4xh1  
d4nlhb\_ d3ezjb1 d3mlwl1 d1kfah1 d1etza1 d1b4jh1 d3cfic\_ d4w68a\_  
d2arja1 d1ek3a\_ d2ok0l1 d1vera\_ d1uwgh1 d1blnb1 d1fpth1 d1rzga1  
d2giya1 d4m3kb1 d1nc2a1 d2nyyd1 d1ncna\_ d1fbih1 d5dxwa\_ d4fqqa1  
d1dqdh1 d1jfq11 d1kelh1 d1faih1 d1frgl1 d1figl1 d4m6nl1 d1fo0a\_  
d4hxb11 d3b5ga\_ d3quyd1 d2h9gb1 d1i8kb\_ d2dd8h1 d2ck0h1 d1eaja\_  
d4w6wb1 d2a6ib3 d1t66d1 d2e27h\_ d1ob1b1 d1f11b1 d2v7na1 d1ad0a1  
d2xt1b1 d1pskh1 d4i13b1 d2op4l1 d1a0ql1 d1uwel1 d1za3a1 d1ncb11  
d4uu9a\_ d1bm3h1 d1cloh1 d1nqba2 d1cf8h1 d4y5va\_ d1mhph1 d5anma1  
d4cdgc1 d4ldeb\_ d1y0lb1 d2pcpb1 d1z3gl1 d1dfb11 d1fh5h1 d3g5xa1  
d1tzib1 d4dn3l1 d3zhka1 d2b1hh1 d2uylal d1f3dh1 d1nj9b1 d2agjh1  
d2h1pl1 d1q72h1 d8fabbl d1ndmb1 d1rjca1 d4u6hb1 d3upca\_ d2fbj11  
d1osph1 d1tvda\_ d2cjev\_ d4fhbd1 d1bd2d1 d1rz7h1 d3nn8a\_ d1blna1  
d1knoa1 d1nfda1 d2bmkb1 d1dq11\_ d1igyb1 d1igfl1 d12e8h1 d3utza1  
d1nc2b1 d1rihh1 d4mwfb1 d4jvpa1 d1mieh1 d1rhfa1 d1fgnl1 d1sbsh1  
d1lp9e1 d1dn0a1 d4lqfl1 d1iaih1 d1kgcd1 d1mh5b1 d1gpol1 d2g60h3  
d1f8tl1 d2jixd1 d4grwh\_ d1fo0b\_ d1bfob1 d1axsa1 d1u9ka\_ d1nmbh\_  
d1h8na1 d1h8na2 d1jguh1 d4eura1 d3sdy11 d35c8h1 d1w72l1 d1mvub\_  
d1i9rh1 d1ob1a1 d4wenb\_ d1yeeh1 d3ietc1 d1f58h1 d1ad0b1 d1mqkl\_  
d1nbvh1 d4b50a\_ d3r8bb\_ d1baf11 d1mamh1 d4rgne1 d2gsgb\_ d35c8l1  
d1bafh1 d1ai1h1 d2pcpa1 d2fath1 d2x1pa\_ d1orsb1 d1libgl1 d1shma\_

d1a2yb\_ d1u0qa\_ d2coqa\_ d1hilb1 d1qfwi\_ d1jv5b\_ d1fn4b1 d5e0qa\_  
d1nsnh1 d1plgl1 d4ocxl1 d1kb5h1 d1rzhf1 d1pg7x1 d2fx7h1 d2oi9c\_  
d1l7i1l d3eyva1 d1d5i1l d4ffyl\_ d1tetl1 d1a6wh\_ d1ac6a\_ d3dvfa\_  
d1nfdel d1mimh1 d1ri8a1 d1jhlh\_ d3dura\_ d1fskb1 d1f97a1 d3so3b1  
d2ak4d1 d1lp9f1 d4z7wf1 d1l7th1 d4y5ya\_ d4x7ec1 d1emth1 d1ikfl1  
d1nlbh1 d4uta1l d1bjma1 d1eapb1 d1u6ah1 d2dtgd1 d1kj2b\_ d1xeda1  
d1cleh1 d1fgvh\_ d2bnub1 d2fb4h1 d2dtgb1 d1ktrh\_ d1jpth1 d1qkzl1  
d4hepg\_ d2atpb1 d1flrh1 d2hrpl1 d1mvfa\_ d1iaim1 d3k80a1 d2jb5h1  
d3zkxc\_ d4grwe\_ d1it9h1 d1rhhb1 d3w9ec\_ d1e4wh1 d1sy6h1 d2j6eh1  
d3qxta\_ d1jglh1 d1p7ka1 d1tzhb1 d4n8pa1 d1gaf1l d2jelh1 d1wioa2  
d4i0cc1 d1cicb1 d1lmka2 d1lmka1 d1iqwh1 d1orqb1 d1ejoh1 d1jnlh1  
d4zg1a\_ d43c9b\_ d1ggbl1 d1wejh1 d3q6fa1 d1f3dj1 d3c6la1 d1bqlh1  
d3p9wb\_ d1a3r1l d1h0db1 d2uzil\_ d1eo8l1 d1qfwl\_ d1n7ml1 d1igja1  
d1c5ch1 d2a9mh\_ d1rmfh1 d1fj1b1 d4heme\_ d1ccza1 d1a5fh1 d1ogad1  
d1dlfh\_ d1qa9b\_ d1vge1l d3qskb\_ d1sjxa\_ d4ozfg1 d1sq2n\_ d1qd0a\_  
d1kcvh1 d1c5db1 d3qcull d8faba1 d3bn9d1 d1mjuh1 d4y8dc\_ d7fabh1  
d3dvgb1 d1lo0l1 d1a6tb1 d1gigh1 d1kcrh1 d2hwz1l d1yjdc1 d3clfl1  
d4krna\_ d1dl7l\_ d1e6ol1 d1mexh1 d3r0ma\_ d4kkna\_ d1fns1l d1loaqh\_  
d1rzia1 d1lucb1 d1ncw1l d4b41a\_ d1nfd1 d2mpah1 d2d7t1l d4grwf\_  
d4b5ea\_ d1l1k3h1 d3u79a\_ d4u3xa\_ d1ghf1l d1bvkb\_ d1mcww1 d1b88a\_  
d1jrrhh1 d32c2b1 d4wemb\_ d1dsfh\_ d1lop3h1 d1ce1l1 d1iqda1 d1qoka1  
d1qoka2 d1qfuh1 d2crya1 d1ay1h1 d1oaql\_ d3ab0b\_ d1rurl1 d1t4kb1  
d1bz7b1 d1n0xh1 d1for1l d1lucb1 d4w6yb\_ d43c9a\_ d2aabl1 d1tzia1  
d4n1ca\_ d1k6qh1 d3g9ab\_ d4tvsa1 d1igmh\_ d1pz5b1 d3dx9a1 d3wxwh\_  
d1nakh1 d1kcul1 d3eaka\_ d4qlra1 d1cr9l1 d1d9ka\_ d1f4xl1 d1deea1  
d2i27n2 d1c12a1 d2orb1l d1j8hd1 d1mcph1 d1c5da1 d1kenh1 d1bd2e1  
d1h5ba\_ d4x7fc1 d3upaa\_ d1t3fa1 d1indh1 d2dtgc1 d4hc1l1 d1zv5a1  
d4wgvb\_ d1uwgl1 d4f37k1 d1aqkh1 d1vesa\_ d3zkqd\_ d1fpt1l d1lo4l1  
d1knob1 d3rrqa\_ d1ct8b1 d4orz\_ d1mlbb1 d4hgkc1 d1dgd1l d1bogb1  
d4ozhe1 d1dr9a1 d1i7za1 d1dn0b1 d1kell1 d1rzib1 d1ypzf1 d1wtla\_  
d1hkfa\_ d1fail1 d1figh1 d2vyre\_ d1sjva\_ d1ohqa\_ d1bfoa1 d1pkqb1  
d1mjul1 d1b4jl1 d1nsn1l d2arjb1 d1p4bh\_ d4aj0a\_ d3nn8b\_ d2rcja1  
d1f2xk\_ d4v1dd\_ d1adqh1 d2eksa\_ d4k3ga\_ d1jfqh1 d1uweh1 d1frgh1  
d4gftb\_ d1uz8b1 d4n1ea\_ d1bm3l1 d1clo1l d3mcka1 d2vq1a1 d1ae6h1  
d4aq1b1 d1uj3b1 d1nbqa1 d1fh5l1 d2ck0l1 d2ywza\_ d1q72l1 d4nxbx\_  
d1hila1 d4hz1b1 d2j88l1 d1zmya1 d1cd0a\_ d1a4ka1 d1pskl1 d1a0qh1  
d4krmb\_ d1ncbh1 d2fbjh1 d1j8he1 d1i3ua\_ d1cf8l1 d1fe8h1 d2p1ya1  
d1eeqa\_ d2x89a\_ d1ol0a\_ d2r0lh1 d1ub5a1 d1dfbh1 d3eyvb1 d4jdvb1  
d4p2cg\_ d2gsia1 d2agjl1 d1u3ha1 d2h1ph1 d1rihl1 d1fskc1 d1boga1  
d2a77l1 d1ospl1 d1qfoa\_ d3dwta\_ d2fx7l1 d1rz7l1 d3stba1 d1pkqa1  
d1b6da1 d1dzba2 d1dzba1 d1kj2a\_ d4l1ha\_ d1rzgb1 d1dq1h\_ d12e8l1  
d1mie1l d1jmaa\_ d1sbs1l d1fgnh1 d1f58l1 d1mqkh\_ d1ndgb1 d3qeg1l  
d1iail1 d2aw2a1 d1tqbc1 d3fo2a1 d4dkaa\_ d1f8th1 d2g60l1 d2ywy\_  
d1uj3a1 d1yc7a\_ d3bd3a\_ d4w6xb1 d1nmb1\_ d1i8ka\_ d1rjlb1 d1ypze1



d1p7kb1 d1kxqe\_ d1gpoh1 d2z4qa1 d1w72h1 d1i9r11 d4qgya1 d4xt1c\_  
d2qqnh1 d1cica1 d3c08h1 d2cd0a\_ d2bdnh1 d1hnga1 d1mam11 d1nldh1  
d1cr9h1 d4lcih1 d3bkyh1 d3qg7l1 d1ai111 d1kxvc\_ d4iosd\_ d1l7ih1  
d2x1qa\_ d1ub6b1 d3k74b\_ d1libgh1 d1teth1 d1igya1 d1hxma1 d2x6ma\_  
d2e7la\_ d5e03a\_ d1qfwm\_ d2r0kh1 d1igjb1 d1rurh1 d1plgh1 d1mj8h1  
d1yuhb1 d3fmg11 d1rzzf11 d1emt11 d1ad9b1 d1igtb1 d1nlb11 d1d5ih1  
d3k7ua\_ d4ffyh\_ d1bwwa\_ d3dvga1 d1a6ta1 d1fgvl\_ d4qxgl1 d1mim11  
d1jhl1\_ d2hffb1 d2hh011 d1qkzh1 d1l7t11 d1afvh1 d1iaii1 d2cjuh\_  
d1um5h1 d2ghwb2 d2ghwb1 d1kgce1 d2fgwh1 d1ikfh1 d1dvfd\_ d2i24n1  
d2xtjb\_ d1za3b1 d2yc1a\_ d2hh0h1 d2x1oa\_ d1bvka\_ d1rjla1 d5e7ba1  
d1igta1 d1il1b1 d2fb411 d1mvua\_ d1jpt11 d32c2a1 d1fvca\_ d1iqdb1  
d2hrph1 d2p4ab\_ d4qo1a\_ d1p2cb1 d1wt5c\_ d1t4ka1 d5c1mb\_ d1it9l1  
d1bz7a1 d1b2wh1 d1e4w11 d1jnl11 d1yedb1 d1za6b1 d3u7aa\_ d1igfh1  
d3gnm11 d1orsa1 d1wejl1 d1a2ya\_ d1hxmb1 d1gafh1 d2j4wh1 d1pz5a1  
d1j05a\_ d1a3rh1 d4fq111 d1qfwh\_ d1eo8h1 d1n7mh1 d4s11a\_ d1kegh1  
d5da4a\_ d1iqwl1 d3whxb1 d1vgeh1 d1deeb1 d1c12b1 d1t2ql1 d1ad9a1  
d3gsnb1 d3b2uc1 d1ggbh1 d1t3fb1 d1nak11 d4ocmc\_ d1lila1 d2v7hb3  
d2esve1 d1mcoh1 d2qr0b1 d2q3aa\_ d1ct8a1 d1kcrl1 d2pxyb\_ d2uzih\_  
d5c3ld\_ d3durb\_ d2ak4e1 d1d17h\_ d1xiwd\_ d1mlba1 d1rmfl1 d1i7zb1  
d1dlfl\_ d2xa3a\_ d5bq7b1 d1dqqb1 d3h4211 d1egjh1 d1kcvl1 d1fe8l1  
d2j6e11 d1f3rb2 d1l1k311 d1sm3h1 d1q0xh1 d1ghfh1 d7fabl1 d1igch1  
d1l00h1 d4idla\_ d5c2b1\_ d1jrh11 d1l11a1 d3zhda1 d4kfzc\_ d1b0wa\_  
d1e6oh1 d1mex11 d4krpb\_ d1fnsh1 d1ncwh1 d4hgma\_ d4eigb1 d4rzca\_  
d2mpa11 d4y5xa\_ d5en2b1 d3lrga1 d4ej1c1 d1rhha1 d1j05b\_ d1forh1  
d1q9wb1 d2wzpd\_ d2aq2a1 d1h0da1 d3revb1 d2ij0c1 d1tzha1 d4m7j11  
d1k6q11 d3b9kc1 d1igml\_ d3qeua1 d1dsfl\_ d1celh1 d1kcu11 d1zvha1  
d1zvoa1 d1tqbb1 d1ay111 d2qsc11 d2cgrh1 d1n10h1 d1ken11 d3eo0a1  
d4n9ob1 d1n0x11 d3k1kc\_ d1d4ua2 d2cqva1 d1fhga\_ d2k1ma\_ d2d12a1  
d1biha3 d1biha1 d1biha4 d3qp3a1 d1glca\_ d1gxea\_ d1cvsc2 d1cvsc1  
d1xmwa2 d2otpa2 d1biha2 d1rhfa2 d2fcba2 d2fcba1 d1wwbx\_ d1gsma2  
d1epfa1 d1epfa2 d2dava1 d1waaa\_ d1f97a2 d1x44a1 d1vcaa2 d1fnla2  
d1fnla1 d3b5ha2 d3h8na2 d3h8na1 d1bjba1 d1bjba2 d1pd6a\_ d1f2qa2  
d1f2qa1 d3cx2a\_ d1nbqa2 d3b5ha1 d1n26a1 d1xiwb\_ d1xaua\_ d1fltx\_  
d2ifga1 d1olla1 d1olla2 d1cs6a4 d1cs6a3 d1cs6a2 d1cs6a1 d2gw5a2  
d1sy6a1 d1xiwa\_ d1lucta2 d1lucta1 d1ry7b2 d1gl4b\_ d1qz1a3 d1olza1  
d2c9aa1 d1wwca\_

**Family-31 (b.40.4.3)**

**Positive dataset contains 11 protein sequences.**

d4ipca1 d1x3ea\_ d4apva\_ d3kdfa\_ d1ue1b\_ d1wjja1 d3eiva\_ d1xjva2  
d1xjva1 d2ccza2 d1se8a\_

**Negative dataset contains 3850 protein sequences.**

d1xfda2 d1m32a\_ d1libja\_ d1c7na\_ d1iuga\_ d4q75a\_ d2bkwa1 d1t3ia\_  
d1n8pa\_ d1qz9a\_ d1jff9a\_ d1leg5a\_ d1p3wa\_ d3kgwa\_ d1cl1a\_ d2ctza1  
d1lvjoa\_ d2rfva\_ d1gc0a\_ d1cs1a\_ d1d2fa\_ d2ch1a1 d1pffa\_ d1elua\_

d1u08a\_ d1lc5a\_ d1b5pa\_ d1bw0a\_ d3pd6a\_ d7aata\_ d2csta\_ d1j32a\_  
d1fg7a\_ d4wlha\_ d1o4sa\_ d1v2da\_ d1gdea\_ d1m6sa\_ d1v72a1 d1svva\_  
d1ajsa\_ d1wsta1 d2f8ja2 d1lk9a\_ d1vp4a1 d1xi9a1 d2gb3a1 d1yaaa\_  
d1xkla\_ d2wfla\_ d3i2ka1 d1lnsa3 d1xkta1 d2hfka\_ d1jmkc\_ d5d3ka\_  
d2cfba1 d1dfoa\_ d1o69a\_ d1bj4a\_ d3k28a\_ d2bwpa\_ d3lg0a\_ d2fnua\_  
d3ou5a\_ d1z7da1 d1b9ha\_ d1iaya\_ d4msoa\_ d1bs0a\_ d1s0aa\_ d1sffa\_  
d3tqxa\_ d1mdoa\_ d3qboa\_ d3pgya\_ d1bjna\_ d2dkja\_ d1ejia\_ d1vefa1  
d4wxga\_ d3bs8a\_ d3gbxa1 d1w23a\_ d4nmwa\_ d2tbvc\_ d1c8nc\_ d1x36a\_  
d1smvc\_ d1ng0c\_ d4sbvc\_ d1lopa\_ d1f2nc\_ d1qnia1 d1fwxa1 d1f56a\_  
d1bypa\_ d1azca\_ d1ws8a\_ d3u25a\_ d1cuoa\_ d1id2a\_ d1rkra\_ d2iaac\_  
d4dp1x\_ d2gima\_ d2i7sa\_ d1qhqa\_ d3ehbb1 d1fftb1 d1gyca3 d1hfua2  
d1kbva1 d1kbva2 d1sdda1 d1sdda2 d1gyca1 d1gyca2 d1mzya1 d2bw4a1  
d1aoza1 d1aoza3 d1aoza2 d1kyaa2 d1kyaa3 d1kyaa1 d1mzya2 d4e9sa1  
d1sddb1 d1sddb2 d1hfua1 d1hfua3 d1oela2 d1v10a2 d1v10a3 d1v10a1  
d1rypd\_ d1irua\_ d1rypc\_ d3unfk\_ d1rypa\_ d1j2pa\_ d1irui\_ d1j2qh\_  
d3unfh\_ d1m4ya\_ d1rypb\_ d1lirul\_ d1lirug\_ d1liru2\_ d1q5rh\_ d1rypg\_  
d1g3ka\_ d1liruf\_ d1q5qa\_ d1e94a\_ d1lirub\_ d1ryph\_ d3ty6a\_ d1liruj\_  
d1liruk\_ d1rype\_ d1lirud\_ d1lirue\_ d3mi01\_ d1rypf\_ d1liruh\_ d2z3ba\_  
d1liruc\_ d3mka2\_ d1lirul\_ d3sxwa1 d1j3qa\_ d4luka\_ d2bema\_ d1pama1  
d1ea9c1 d1qhoa1 d2fhfa2 d2fhfa1 d1k3ia1 d1j0ha1 d1csla1 d2bhua1  
d1ledqa1 d1f1sa2 d1ut9a2 d1gvia1 d1txka1 d2phla2 d2phla1 d1fxza2  
d1fxza1 d1lrha\_ d1uija1 g1dgw.1 d2v09a\_ d1uika2 d1uika1 d1dgwa\_  
d1ktja\_ d1ex0a1 d1g0da1 d1cg2a1 d1yloa2 d1y7ea2 d1y0ya3 d1lfwa1  
d1vixa1 d1fnoa4 d1vhoa2 d1ysja1 d1vhea2 d1z2la1 d2fvga2 d1vgya1  
d1r3na1 d2grea2 d1xmba1 d1rtqa\_ d2bjca1 d2hsga1 d1qpza1 d1k9ua\_  
d2opoa\_ d1r0ka3 d1vkoa2 d1vm6a2 d3qvsa2 d1gr0a2 d1p1ja2 d2ovga\_  
d1sq8a\_ d1rzsa\_ d3kz3a\_ d3orca\_ d3gpdg2 d2q49a2 d1hdgo2 d2g17a2  
d2cvoa2 d2czca1 d3pwka2 d1obfo2 d1i32a2 d1zyao2 d2pkqo2 d1b7go2  
d2hjsa2 d1cf2o2 d1vkna2 d1nvmb2 d1ux8a\_ d1dlya\_ d4i0va\_ d2bkma\_  
d2bmma\_ d2msya\_ d2djoa1 d2r5za\_ d1au7a1 d1f43a\_ d2lmda1 d1akhb\_  
d1s7ea1 d3nara\_ d1zq3p1 d2craa1 d1mija\_ d4uuta\_ d3a01a\_ d1x58a1  
d3rkqa1 d3cmya1 d2cqxa1 d2da6a1 d1e3oc1 d1fjla\_ d1mh3a1 d1ig7a\_  
d1x41a1 d1wh7a1 d1gt0c1 d2mw8a\_ d1lfup\_ d1x2ma1 d1b72a\_ d1wi3a1  
d1jgga\_ d1wjha1 d1x2na1 d1mnmc\_ d2cuea1 d3k2aa\_ d2hosa\_ d2jwta2  
d1pufa\_ d1octc1 d2hi3a\_ d1b8ia\_ d4j19a\_ d3lnqa\_ d1wh5a1 d1b8ib\_  
d1fexa\_ d2cqra1 d1guua\_ d1ug2a1 d2cqqa1 d2ajea1 d4a69c\_ d1h8ac1  
d2crga1 d2iw5b1 d1xc5a1 d2cu7a1 d1wgxa1 d2cjja1 d2ckxa1 d1gvda\_  
d1tc3c\_ d1gdta1 d1u78a2 d6paxa2 d1k78a1 d1k78a2 d1hlva1 d1hlva2  
d1iufa2 d2dara2 d2dara1 d1wyha2 d2dloa2 d1rutx4 d1rutx3 d2cuqa2  
d1x41a2 d1x41a1 d1x3ha2 d1x3ha1 d2d8za1 d1x61a2 d1x6aa1 d1x6aa2  
d2cora2 d2cora1 d1v6ga1 d1v6ga2 d2d8za2 d1x64a1 d1x64a2 d1b8ta1  
d2co8a1 d1x63a2 d2dj7a2 d2dj7a1 d2cu8a2 d2cu8a1 d1g47a2 d1g47a1  
d1j2oa1 d1wyha1 d2dloa1 d1wiga1 d1wiga2 d2cupa2 d2cupa3 d1x68a1  
d2d8ya2 d2d8ya1 d1m3va2 d1x62a1 d1x68a2 d1x61a1 d1b8ta3 d1b8ta2

d2d8xa2 d2d8xa1 d1x4ka1 d1x4ka2 d2cuqa1 d1m3va1 d2co8a2 d1j2oa2  
d1x63a1 d2cura1 d2cura2 d1x62a2 d3lv8a\_ d1s3ga1 d1zaka1 d1s4qa\_  
d3tvta2 d1uf9a\_ d1khta\_ d1ckea\_ d1losna\_ d1p5zb\_ d4tmka\_ d3cm0a\_  
d1tmka\_ d1jaga\_ d3h86a\_ d1t0hb\_ d1nn5a\_ d2h92a\_ d3kb2a1 d2c95a1  
d1yj5a2 d1kgda\_ d1ly1a\_ d2ak3a1 d1vyva2 d1deka\_ d2grja1 d1p3ja1  
d1y63a\_ d1e4ya1 d1s96a\_ d3iija1 d1lvga\_ d1nksa\_ d1vyua2 d4e22a\_  
d1qf9a\_ d1jjva\_ d1q3ta\_ d1ki9a\_ d1lw7a2 d1teva\_ d1kjwa2 d1gsia\_  
d1g3ma\_ d1j99a\_ d1t8ta1 d1nsta\_ d1zrha\_ d1ls6a\_ d2a3ra\_ d1aqua\_  
d2zptx\_ d3ckla\_ d1texas\_ d1q44a\_ d2gwha\_ d1z0ja1 d3umra2 d3gj0a1  
d2gaoa1 d1yzga1 d1x3sa1 d1g7sa4 d1puja\_ d1udxa2 d1kk1a3 d2o52a\_  
d1jwyb\_ d1zcaa2 d1zcba2 d2fv8a1 d2cjwa\_ d3dz8a1 d1xzpa2 d1vg8a\_  
d4qxaa\_ d2ew1a1 d1x1ra1 d2bcgy\_ d3doea1 d3cona\_ d3rega\_ d3wyga\_  
d1upta\_ d2b6ha1 d1zd9a1 d1r5ba3 d1n0ua2 d1r2qa\_ d2f91a1 d2rhda\_  
d3q3jb\_ d3q85a\_ d1efma1 d1r8qa\_ d2gf9a1 d2akab1 d1ek0a\_ d1z08a1  
d2gcoa1 d2dy1a2 d4g01b\_ d2cxxa1 d1svia\_ d3q72a\_ d1ni3a1 d4ac9a4  
d2erxa1 d2bmea\_ d1wxqa1 d2gf0a1 d4ldja1 d1zunb3 d1d5ca\_ d4lv5b\_  
d1efca3 d1kmqa\_ d2g6ba1 d3lrpa\_ d1tada2 d2y8ea\_ d4rd4a1 d1z06a1  
d2heia\_ d3a58b\_ d1u0la2 d1d2ea3 d1zj6a1 d2ocba\_ d3rwoa\_ d1mr3f\_  
d2e9sa1 d4u5xa1 d2iwra\_ d2fn4a1 d3bwdd\_ d2nzja1 d2atva1 d2ksqa\_  
d3l43a\_ d1mkya2 d1mkya1 d1wmsa\_ d1jnya3 d2rmka\_ d1f6ba\_ d1f60a3  
d1gota2 d1jala1 d2fh5b1 d1g16a\_ d2wblc\_ d1m7ba\_ d1wf3a1 d1f5na2  
d1t9ha2 d1z6xa1 d1z0aa1 d2fg5a1 d2a5ja1 d2bcjq2 d1s0ua3 d1ky3a\_  
d4y0va\_ d4lhwa\_ d2qmea1 d2atxa1 d1legaa1 d1ryha\_ d1moza\_ d1nrjb\_  
d2erya1 d3bfka\_ d1puia\_ d1fzqa\_ d3j3az1 d3t5ga\_ d1shza2 d3defa\_  
d2f7sa1 d3raba\_ d3tsoa\_ d3aq4a\_ d2a17a1 d3sfva1 d3bc1a\_ d2ncda\_  
d1sdma\_ d3h4sa1 d2heha\_ d2grya\_ g3kin.1 d1kk8a2 d1br2a2 d1goja\_  
d1f9va\_ d2mysa2 d1lkxa\_ d3t0qa\_ d4db1a1 d3gbja\_ d1v8ka\_ d1k8ka2  
d1k8ka1 d3uleb1 d3i33a2 d3i33a1 d1bupa1 d1dkgd2 d1dkgd1 d4ci6a2  
d1jcfa1 d4a2ba2 d2fxua1 d1yaga2 d1yaga1 d4cbua2 d1g99a2 d2e1za2  
d2e1za1 d1saza1 d1saza2 d1ig8a1 d1czan2 d1czan3 d1ig8a2 d1czan4  
d1bg3a4 d1bg3a3 d1bg3a2 d1bg3a1 d3h1jd1 d2d0oa3 d2d0oa2 d1nbwa3  
d1hroa\_ d4gedb\_ d3zooa\_ d1mz4a\_ d1gu2a\_ d1f1fa\_ d1dvva\_ d1c6ra\_  
d1c75a\_ d1e29a\_ d1gdva\_ d1cnoa\_ d1h32b\_ d1co6a\_ d2bh4x\_ d2aiua\_  
d5cytr\_ d1jdl1a\_ d1i8oa\_ d2zboa\_ d3dmia\_ d1ls9a\_ d1wvec\_ d2yk3a\_  
d3ph2b\_ d1dw0a\_ d5aura\_ d1ql3a\_ d1qn2a\_ d1f1ca\_ d4zzva\_ d2xspa\_  
d1leg1a\_ d4v20a\_ d4ipma1 d1gpia\_ d4csia\_ d3pfza\_ d3ovwa\_ d2yoka\_  
d2nqya\_ d1h4ga\_ d1hixa\_ d1oa2a\_ d1olra\_ d3b7ma\_ d4h7ma1 d3wp3a\_  
d2vgda\_ d1ligoa\_ d3zsea\_ d2nlra\_ d3wx5a\_ d1oa3a\_ d1pvxa\_ d1m4wa\_  
d1f5ja\_ d1oa4a\_ d1ks5a\_ d4ix1a1 d1h32a1 d1evsa\_ d1cnt1\_ d1pvhb\_  
d1z7ca\_ d1huwa\_ d1bgea\_ d1rhga\_ d1f6fa\_ d1i1rb\_ d1axia\_ d1etea\_  
d3tgxb\_ d1scfa\_ d2z3qa1 d3qb1a\_ d1hula\_ d1m48a\_ d4nkqb\_ d1leera\_  
d1v7mv\_ d5e4ea\_ d2o27a\_ d3b5ka\_ d2psma1 d4zf7a\_ d3uf5a\_ d4x51a\_  
d4ypgc1 d3oq3a\_ d1lqsl\_ d1n1fa\_ d1aula\_ d1wu3i\_ d3bes1\_ d3ux9a\_  
d4dnxa2 d1v47a2 d1g8fa2 d1jhda2 d1x6va2 d3rbaa\_ d2qtra\_ d1nupa\_

d3l92a\_ d1f9aa\_ d1qjca\_ d2h29a\_ d1vlha\_ d1lw7a1 d1mrza2 d4ruka\_  
d2el7a\_ d1liq0a2 d1irxa2 d1r6ta2 d2cyba\_ d1rqga2 d1j09a2 d2yxna\_  
d1f7ua2 d1h3fa1 d1ffya3 d2g36a1 d1n2za\_ d1jila\_ d1n3la\_ d1i6la\_  
d1pfva2 d1h3na3 d3n9ia\_ d3sz3a1 d3sw2a\_ d1moxc\_ d1dx5i3 d1edmb\_  
d1aut12 d1aut11 d1nqlb\_ d1dva11 d1szba2 d1kigl\_ d2y5fl\_ d1ijqa2  
d1gk5a\_ d1g1sa2 d1nt0a3 d1lmja2 d1lmja1 d1nzia2 d2wphe\_ d1klil\_  
d1pfx12 d1pfx11 d1p9ja\_ d1g1ta2 d1f7ea\_ d4yzub\_ d1nuba2 d2mgpa1  
d1b9wa1 d2mgpa2 d1ob1c1 d1ob1c2 d1n1ia2 d1n1ia1 d2npra2 d2npra1  
d1mlxb5 d1qx2a\_ d2y5ia\_ d1qlsa\_ d1psra\_ d3n22a\_ d2egda\_ d4ggfc\_  
d2wcea\_ d2luca\_ d4aqia\_ d3nsia\_ d2lp3a\_ d1j55a\_ d1a4pa\_ d1nsha\_  
d1pvaa\_ d3fs7a\_ d2pvba\_ d1ttxa\_ d2kyfa\_ d1rk9a\_ d1a75a\_ d1exra\_  
d1tiza1 d1nyaa\_ d1g8ia\_ d1ggwa\_ d1wdcc\_ d3fwba\_ d1ggza\_ d2o5ga\_  
d1ctaa\_ d3i5gc\_ d1sl8a\_ d1fpwa\_ d2scpa\_ d2roaa\_ d4aqra\_ d3pn7b\_  
d1br1b\_ d2mysb\_ d1s6ca\_ d1bjfa\_ d2obha\_ d1jfka\_ d1jf0a\_ d1qv0a\_  
d1lkja\_ d2mlfc\_ d2m97a\_ d2d8na\_ d4by5a\_ d1jbaa\_ d4nqga\_ d1wdcb\_  
d2mysc\_ d1j7qa\_ d1s6ia\_ d1uhka2 d1r2ua\_ d1dtla\_ d3kf9a\_ d3pn7c\_  
d1qjta\_ d1fi6a\_ d5d67d\_ d1tuza\_ d1h8ba\_ d1eg3a2 d2zkmx1 d1snla\_  
d1gjya\_ d1ylxa\_ d1hqva\_ d1dvia\_ d1df0a1 d1qxp2a\_ d4usla\_ d1jfxa\_  
d1wkya2 d1uuqa\_ d3wh9a\_ d4mlra\_ d1xyza\_ d4xuya\_ d2je8a5 d4bf7a1  
d3cuia\_ d1ur4a\_ d1qw9a2 d1odza\_ d2vzsa5 d1bqca\_ d2x2ya1 d1hjqa\_  
d1qnra\_ d4y7ea1 d1vjza\_ d4k68a\_ d2v3ga\_ d4hpga\_ d1nofa2 d1nq6a\_  
d1h4pa\_ d1aq0a\_ d3ziza\_ d4bs0a\_ d1ecea\_ d1h1na\_ d1ta3b\_ d1w91a2  
d1ilwa\_ d1uhva2 d1legza\_ d7a3ha\_ d1tvna1 d3nyda1 d1ghsa\_ d2cyga1  
d4xv0a\_ d2c8na2 d1w32a\_ d3emca\_ d1v6ya1 d1foba\_ d2uwfa1 d2fgla\_  
d3niya1 d2c0ha1 d1rh9a1 d1yq2a5 d1szna2 d1fa2a\_ d1pama4 d5do8a1  
d1ea9c3 d1hx0a2 d2fhfa5 d1qhoa4 d1avaa2 d1m53a2 d4m8ua1 d2gjpa2  
d1lwha2 d4howa1 d1ktba2 d1j0ha3 d3vm5a1 d2x1ia\_ d1wzaa2 d2diea1  
d1mxga2 d1ht6a2 d1eswa\_ d1liv8a2 d5cpsa\_ d1ud2a2 d1zjaa1 d3gbea1  
d1kwga2 d1wdpa\_ d1gcya2 d1g5aa2 d1hvxa2 d3dhp2a\_ d2bhua3 d4do4a1  
d3qgva1 d1e43a2 d1g94a2 d2d3na2 d1gjwa2 d1gvia3 d1x1na1 d1r7aa2  
d1tz7a1 d4toqa\_ d1wb0a1 d1w9pa1 d1eoka\_ d1itxa1 d1kfw1a\_ d1goia2  
d1edqa2 d2gsja\_ d1hjxa1 d1jnda1 d1vf8a1 d1etob\_ d1lumqa\_ d1g2ha\_  
d1g4ma1 d1g4ma2 d2y8ga\_ d1xkea1 d2y8fa\_ d2v76a\_ d1wj1a1 d1aqca\_  
d1qqga2 d1ntva\_ d1n3ha\_ d4dbba\_ d3f0wa1 d1p3ra\_ d1wgua1 d2cy4a1  
d3hqca\_ d1wvha1 d1xr0b1 d3nvva1 d1krha3 d2h88b1 d1n62a2 d1t3qa2  
d1kf6b2 d1zoyb1 d1jq4a\_ d1ffva2 d1dgja2 d1rm6c2 d1h6ua1 d9ldta1  
d2ewda3 d1up7a1 d2dfda1 d1s6ya1 d1vjta1 d7mdha1 d1hyea1 d1t2da1  
d1ojsa3 d1b8pa1 d1ldna1 d1hyha1 d1civa1 d2a92a1 d1ez4a1 d1i0za1  
d1y6ja1 d1gv0a1 d1ur5a1 d1lllda1 d1lobba1 d1v8ba1 d1gdha1 d1l7da1  
d2dlda1 d1mx3a1 d1ygya1 d1li4a1 d1j4aa1 d2naca1 d1npya1 d3t4ea2  
d1a4ia1 d1o0sa1 d2hk9a2 d2egga2 d1b26a1 d1bvua1 d1gg2a1 d1c1da1  
d1leha1 d1gtma1 d1euza1 d1nvt1a\_ d3dona2 d1edza1 d1gpja2 d1vi2a1  
d1p77a1 d1nyta1 d1vl6a1 d1v91a1 d1txga2 d3f47a1 d1mv8a2 d2pv7a2  
d1xc2a3 d2ahra2 d4xiya1 d2f1ka2 d1pgja2 d1i36a2 d1np3a2 d1lj8a4

d1teaa3 d1qmg2 d2i76a2 d2g5ca2 d1wdka3 d1dlja2 d3cuma3 d1kola2  
d1f8fa2 d1qora2 d1jqba2 d1vj0a2 d1cdoa2 d1gu7a2 d1d1ta2 d1xa0a2  
d2dm6a2 d1jvba2 d1rjwa2 d1llua2 d1tt7a2 d1piwa2 d1o89a2 d1iz0a2  
d1e3ja2 d1yb5a2 d1luufa2 d1vj1a2 d1e3ia2 d3gpdg1 d1vc2a1 d2nvwa1  
d1u8fo1 d1ydwa1 d1hdgo1 d2g17a1 d1cf2o1 d2czca2 d1r0ka2 d1obfo1  
d2cvoa1 d1ebfa1 d1h6da1 d1i32a1 d1zh8a1 d2q49a1 d1qkia1 d1j5pa4  
d3pzra1 d1xeea1 d1vkoa1 d1vm6a3 d3qvsa1 d2pkqo1 d1b7go1 d1gr0a1  
d1p1ja1 d1lc0a1 d1j0xo1 d3pwka1 d2hjsa1 d1zyao1 d1vkna1 d1t1ta1  
d1nvmbl d3sjua\_ d3ojfa1 d1xu9a1 d2jjya1 d1n7ha\_ d1y1pa1 d1h5qa\_  
d1jtva\_ d4fs3a\_ d2bkaa1 d1gy8a\_ d2c5aa1 d1ulsa\_ d1ooea\_ d2b69a1  
d1y5ma1 d1spxa\_ d1aela\_ d1bxka\_ d1ydea1 d1gega\_ d1hdoa\_ d1o5ia\_  
d1e6ua\_ d1snya1 d2rhca\_ d3zv4a\_ d5ceja\_ d2d1ya1 d1fjha\_ d3w8ea\_  
d2fmua1 d1x1ta\_ d1rpna\_ d3ay7a1 d1k2wa\_ d1eq2a\_ d2hrba1 d3ruaa\_  
d2ew8a1 d4hwka\_ d1xgka\_ d2bd0a1 d1yo6a1 d2a35a1 d2ntva\_ d1vl8a\_  
d1hdca\_ d4bkua\_ d2ag5a1 d2q45a\_ d1nffa\_ d4iy1a\_ d1zbqa1 d1kewa\_  
d1ek6a\_ d1ja9a\_ d2q46a2 d1iy8a\_ d1cyda\_ d2ptga\_ d1hxha\_ d1uzma1  
d3lyla\_ d4m89a\_ d3wyea\_ d2b1la1 d1w6ua\_ d1sb8a\_ d2q2va\_ d4nr0a\_  
d1e6wa\_ d2gasa\_ d3oiga1 d2bgka1 d1mxha\_ d1vl0a1 d1rkxa\_ d1r6da\_  
d1wmaa1 d1e7wa\_ d2c07a1 d1xkqa\_ d3tzha\_ d1g0oa\_ d3lz6a\_ d1qyca\_  
d1ledoa\_ d1oc2a\_ d1t2aa\_ d1zema1 d2xoxa\_ d1z45a2 d1geea\_ d1p33a\_  
d3lt0a\_ d4e6pa\_ d2wyua\_ d1db3a\_ d4q9na\_ d1xhla\_ d4o1ma\_ d1fmca\_  
d2uvda\_ d2gdza1 d1uaya\_ d2z1ma\_ d2o23a2 d2fr1a2 d2fr1a1 d1qsga\_  
d1qyda\_ d4zjua\_ d2a4ka1 d1yb1a\_ d1wvga1 d1yxma1 d3f4ba\_ d1mg5a\_  
d1xg5a1 d1e2ta\_ d4c5pa\_ d2bsza1 d4bgfa\_ d1w4ta1 d3u1ra1 d1g9ka2  
d1kapp2 d1k7ia2 d1t3ca\_ d1epwa3 d2a97a\_ d3f1ea\_ d3ioqa\_ d1fh0a\_  
d1o0ea\_ d1khqa\_ d1m6da\_ d2cb5a\_ d1cs8a\_ g8pch.1 d1s4va\_ d2pnsa\_  
d1vsna1 d1mira\_ d1iwda\_ d2oula\_ d7pcka\_ d3bwka\_ d3bcna\_ d2p86a\_  
d1pvja\_ d1pcia\_ d1gece\_ d1deua\_ d4bs6a\_ d1xkga1 d1cqda\_ d1jqpa2  
d2c0ya\_ d2bdza\_ d3p5ua\_ d2jk6a2 d2jk6a1 d1feca1 d1feca2 d1lpfa1  
d1lpfa2 d1xhca1 d1xhca2 d1dx1a2 d1dx1a1 d1gera2 d1m6ia2 d1onfa1  
d1onfa2 d3lada2 d3lada1 d1w4xa1 d1w4xa2 d1gesa2 d1mo9a1 d1xdia1  
d1fl2a2 d1fl2a1 d1fcda1 d1fcda2 d1h6va2 d1h6va1 d1mo9a2 d1gv4a2  
d1gv4a1 d2gv8a2 d2gv8a1 d1aoga1 d1aoga2 d1hyua1 d1ebda1 d1ebda2  
d3dk9a1 d1q1ra2 d1gesa1 d1pv8a\_ d1w5qa\_ d2c1ha\_ d1l6sa\_ d1zbfal  
d2z1ha\_ d2etja1 d3qioa1 d1j11a\_ d2e41a\_ d1j12a\_ d2lsna1 d1uaxa\_  
d2yv0x\_ d1mu2a1 d1lekea\_ d1i39a\_ d1pn0a1 d1reoal d1ju2a1 d2f5va1  
d3c96a1 d2gmha1 d1pj5a2 d1gpea1 d1n4wa1 d1k0ia1 d2dw4a2 d2ivda1  
d1seza1 d2voua1 d1kdga1 d1s5ja1 d2hbj2a2 d2igia\_ d1wlja\_ d1qhta1  
d4dleal d1tgoa1 d2f96a1 d3tr8a1 d3mxma\_ d1q8ia1 d1y97a1 d1w0ha\_  
d1kfsa1 d2py5a1 d1noya\_ d1d5aa1 d1yt3a3 d2guia\_ d3mwpa1 d4kb1a\_  
d1liv0a\_ d1nu0a\_ d1js9c\_ d1f15b\_ d1za7a\_ d1laja\_ d1r7ha\_ d1faaa\_  
d1wika1 d1xfla\_ d1ttza1 d2f51a1 d1ti3a\_ d1nhoa\_ d1sena\_ d2i4aa\_  
d1lep7a\_ d1zmaa1 d1fo5a\_ d3lefa1 d3diea1 d2yana1 d1z6na1 d1loza\_  
d3zywa1 d4aj8a\_ d1nm3a1 d4fiwa\_ d1wmja\_ d4hs1a1 d1liloa\_ d1xwaa1

d1wjka1 d2vm1a\_ d1fb6a\_ d1gh2a\_ d1h75a\_ d1nw2a\_ d1kx5b\_ d3a6na\_  
d4m6ba2 d2nqbd\_ d3wkjd\_ d2yfwe\_ d4h9na\_ d5bnxa\_ d1kx5c\_ d3r45a\_  
d1eqzb\_ d4jjnb\_ d1f66c\_ d1eqza\_ d4wnnb\_ d1kx5a\_ d1u35c1 d1id3a\_  
d2nqbc\_ d1kx5d\_ d1tafa\_ d1bh9b\_ d1tafb\_ d1jfib\_ d1q9ca\_ d1h3ob\_  
d2byka1 d1n1ja\_ d4g92b\_ d1bh9a\_ d1jfia\_ d1h3oa\_ d2bykb1 d1pd212  
d1nhya2 d2a2ra2 d1k0dd2 d1f2ea2 d1gsua2 d1f3ba2 d2fhea2 d2pvqa1  
d1tw9a2 d1oyja2 d1e6ba2 d1k0ma2 d3ik7a1 d4is0a1 d1r5aa2 d1j1va2  
d1m0ua2 d3gtub2 d1z9ha2 d1okta2 d1axda2 d2gsra2 d1tu7a2 d1k3ya2  
d1zgma1 d1b48a2 d1gnwa2 d1gwca2 d2gsta2 d1glqa2 d1oe8a2 d1v2aa2  
d1fw1a2 d1duga2 d3vrda1 d3vrda2 d1fcdc2 d1fcdc1 d1h1oa2 d1h1oa1  
d1m70a1 d1iqca2 d1iqca1 d1eb7a2 d1eb7a1 d1nmla1 glf8v.1 d1novc\_  
d2bbvc\_ d1qusa\_ d1sefa\_ d1sfna\_ d1sq4a\_ d3wyha\_ d4g9sa1 d3gxra\_  
d1gd6a\_ d1f6ra\_ d1ivma\_ d2gv0a\_ d1iiza\_ d2z2fa\_ d1j8xa\_ d1ghla\_  
d1b9oa\_ d1741a\_ d1691a\_ d2o4wa\_ d1p37a\_ d1k28a3 d1xjta1 d1jtma\_  
d2f2qa\_ d4e97a1 d2pjsa1 d1k11a\_ d2i7ra1 d1ecsa\_ d1xqaa1 d5cj3a1  
d1npba\_ d1jifa\_ d2p7oa\_ d1nkia\_ d1mpya2 d1kw3b2 d4ghga1 d1tfza1  
d3isqa1 d3isqa2 d1sqia1 d1sqia2 d1lkda2 d1lkda1 d1mpya1 d1cjxa2  
d1cjxa1 d1sp9b2 d1t47a1 d1t47a2 d1f1ua2 d1sp8a1 d1sp8a2 d1f1ua1  
d1s5ja2 d1qhta2 d4dlea2 d1tgoa2 d3py8a2 d1q8ia2 d1kfsa2 d2py5a2  
d1d5aa2 d1qsta\_ d2beia1 d4m3sa\_ d1u6ma1 d1ygha\_ d1yk3a1 d3dr6a\_  
d1xmta\_ d1z4ea1 d2ge3a1 d1bo4a\_ d2fiaa1 d2jdca1 d1y9wa1 d3to7a\_  
d1wwza1 d2f14a1 d2ozua1 d2b5ga\_ d2cy2a1 d2p0wa\_ d1cm0a\_ d4pswa\_  
d1yrea1 d1yr0a1 d1m4ia\_ d2gana1 d1yvka1 d1ghea\_ d2g3aa1 d1y7ra1  
d2euia1 d1q2ya\_ d2fsra1 d1xeba\_ d2ae6a1 d1cjwa\_ d1qsmas\_ d2aj6a1  
d1y9ka1 d1i12a\_ d1vkca\_ d2atra1 d1n71a\_ d2d4pa1 d2fiwa1 d2fe7a1  
d1tiqa1 d2ou2a\_ d1yx0a1 d2fcka1 d1p0ha\_ d2j8ma\_ d2pq8a\_ d1z4ra1  
d1s3za1 d1ufha\_ d1xvqa1 d1pn0a2 d3hy2a\_ d2cvba1 d1o8xa\_ d1we0a1  
d2bmxal d2a4va1 d1psqa\_ d1xiya1 d1q98a\_ d1n8ja\_ d1zofa1 d2ggta\_  
d3tjja\_ d4je1a1 d1o73a\_ d3s9fa\_ d2zcta\_ d1qmva\_ d1jfua\_ d2b1ka\_  
d5dvba1 d2b5xa1 d2v2ga\_ d1st9a\_ d3tb2a\_ d411ra\_ d4fh8a1 d1e2ya\_  
d1knga\_ d2h30a\_ d1i5ga\_ d2z9sa\_ d2f8aa1 d1tp9a1 d2b7ka\_ d1nm3a2  
d3hvva\_ d2wfca1 d4kcea\_ d1xvwa1 d4gqca1 d3qpma\_ d4k1fa\_ d1zsoa1  
d1gp1a\_ d1prxa\_ d4od7a1 d1z6ma1 d4mcua1 d4dvca1 d1r4wa\_ d3l9sa\_  
d1un2a\_ d3rppa\_ d1e88a1 d1l6ja4 d1eaka4 d1eaka3 d1l6ja3 d1h8pa2  
d1h8pa1 d1jgta2 d1ea0a3 d1ecfa2 d1q15a2 d1ct9a2 d1ao0a2 d1te5a\_  
d1ra6a\_ d1muka\_ d3gsza\_ d1khva\_ d1te9a\_ d2xwha\_ d3uqsa\_ d3hkwa\_  
d3n6ma\_ d2cjqa\_ d2xyma\_ d1teba\_ d1te8a\_ d1s48a\_ d1u09a1 d4wfxa\_  
d3tyqa\_ d2pgga1 d1lgya\_ d4l3wa\_ d1llfa\_ d1gz7a\_ d1lukca\_ d4wfia\_  
d4cg1a1 d3visa\_ d1cr6a2 d3groa\_ d1pjaa\_ d1ei9a\_ d1svpa\_ d1mbma\_  
d3su6a1 d1cula1 d4agka\_ d1vcpa\_ d1q31a\_ g1n11.1 d3e90b\_ d1ep5a\_  
d3u1jb\_ d3zxha\_ d1cgl1a\_ d1rm8a\_ d1eaka2 d1hy7a\_ d2jsda\_ d1cxva\_  
d1hv5a\_ d1i76a\_ d3p0ya1 d1igra1 d1n8yc2 d1n8yc1 d1m6ba2 d1m6ba1  
d1dzka\_ d4tlja\_ d2a2ua\_ d4wfva\_ d3t1da\_ d4iixa\_ d3zq3a\_ d2nnda\_  
d1i4ua\_ d1kxoa\_ d1bbpa\_ d1kt7a\_ d1lexsa\_ d3s26a1 d1lf7a\_ d1qfta\_

d4gh7a\_ d1z24a1 d1qabe\_ d1xkia\_ d3bx7a\_ d4iawa1 d1n0sa\_ d1gkab\_  
d3kzaa\_ d2k23a\_ d219ca1 d2joza1 d1gm6a\_ d3kffa\_ d3saoa1 d1e5pa\_  
d1yupa1 d1iiua\_ d1lmra\_ glapy.1 d31jqa\_ d4lu0a\_ d1of8a\_ d3unda1  
d3e9aa1 d1vr6a2 d1n8fa\_ d2qkfa\_ d1d9ea\_ d1mqta\_ d1d4m3\_ d1fmd3\_  
d2mev1\_ glaym.1 d1ev13\_ d4q4w1\_ d1r1a3\_ d2x5ia\_ d1rhi1\_ glr1a.1  
g1d4m.1 g1rhi.1 d1b35b\_ d1loopa\_ d1tme1\_ d4iv1a\_ g1pvc.1 glfpn.1  
d1fpn1\_ d4gb31\_ d1d4m1\_ d1fmd1\_ d1ev11\_ d2wzr3\_ g1cov.1 d1qqp3\_  
g1fmd.1 d2x5ic\_ d1rhi3\_ g1oop.1 d1hxs1\_ g1hxs.1 d1fpn3\_ d1bev1\_  
g2mev.1 d1eah3\_ d1aym1\_ d1pvc3\_ d1qqp1\_ d1zba3\_ d1h8ta\_ d3vbhc\_  
g1b35.1 g1bev.1 d1hxs3\_ g1ev1.1 d1bev3\_ g1tmf.1 d1tmf1\_ d1b35a\_  
d2mev3\_ g1eah.1 g1h8t.1 d1eah1\_ d4q4w3\_ d1r1a1\_ d1aym3\_ d1pvc1\_  
d1zba1\_ d1h8tc\_ d1oopc\_ d1tme3\_ g1qqp.1 d4iv1c\_ d4w9ta\_ d1jvna1  
d4x2ra1 d1ka9f\_ d4axka1 d1thfd\_ d1h5ya\_ d4u28a\_ d2y88a\_ d4wd0a\_  
d1vzwa1 d3ia2a\_ d4dgqa1 d1hkha\_ d1zoia\_ d41t9a1 d3tc7a1 d3hoja\_  
d3vnda\_ d3n18a1 d1geqa\_ d3nav1a1 d1v5xa\_ d4a2ra1 d3tc6a1 d1ujpa\_  
d4ijba\_ d1xcfa\_ d1vc4a\_ d1rd5a\_ d1qopa\_ d3b5va\_ d2r80b\_ d1cqxa1  
d1cg5a\_ d1gcvb\_ d3boma\_ d2h8fb\_ d2raoa\_ d3bj1a\_ d4hrrb\_ d2r50a\_  
d3d1kb\_ d2aalb1 d3zhwa\_ d3hf4b\_ d3gdja\_ d1jebb\_ d3bj1b\_ d1x9fb\_  
d1wmub\_ d1gcva\_ d3bcqb\_ d3d4xb\_ d1gvha1 d2dc3a\_ d3hf4a\_ d4yu3a\_  
d3k8ba\_ d1qpwb\_ d2r80a\_ d3bcqa\_ d1v4wa\_ d3wtgb\_ d1j17a\_ d4esaa\_  
d1a9we\_ d3d1ab\_ d1fsla\_ d4h21a\_ d1v4wb\_ d1mwca\_ d1vhba\_ d1jeba\_  
d1spgb\_ d1h97a\_ d1q1fa\_ d1tu9a1 d3d1aa\_ d1hdsb\_ d3hyub\_ d2zfb\_  
d3fs4a\_ d1oj6a\_ d1shrb\_ d4h21b\_ d4yu3b\_ d1spga\_ d3hrwa\_ d3qqra\_  
d3at5a\_ d4wchd\_ d3hyua\_ d1cg5b\_ d1uc3a\_ d1hbra\_ d2raob\_ d1outb\_  
d4esab\_ d3gdjb\_ d3qqqa\_ d1x9fc\_ d3vrfa\_ d1litha\_ d3mkba\_ d3d4xa\_  
d3mjpa\_ d1j16a\_ d3fh9a\_ d1outa\_ d2dc3b\_ d1it2a\_ d3eoka\_ d3g46a\_  
d1qpwa\_ d3vrfb\_ d1ch4a\_ d1x9fd\_ d1hdsa\_ d2zfb\_ d3mkbb\_ d3wtga\_  
d1a4fa\_ d3fh9b\_ d3bomb\_ d3cy5a\_ d3at5b\_ d1x9fa\_ d2oifa\_ d4lmb\_  
d1cpcb\_ d3v57a\_ d1kn1a\_ d1cpca\_ d4f0ta\_ d2vjha\_ d4po5b\_ d1eyxa\_  
d1alla\_ d4f0tb\_ d1b33b\_ d1b8db\_ d4h0mb\_ d1b33a\_ d2vjhb\_ d4lmb\_  
d2vmlb\_ d1allb\_ d2vjta\_ d3dbja\_ d2vmla\_ d2vjtb\_ d4f0ub\_ d1f99b\_  
d4rmpa1 d1liaa\_ d1eyxb\_ d2uulb\_ d4lmsb\_ d4f0ua\_ d2bv8a\_ d1f99a\_  
d2bv8b\_ d2c71b\_ d3dbjb\_ d4rmpb1 d1b8da\_ d4h0ma\_ d3v57b\_ d1kn1b\_  
d1liab\_ d2uula\_ d2j96a\_ g1gxs.1 d2xqfa\_ d1ea5a\_ d1f6wa\_ d1dx4a\_  
d1qe3a\_ d1k4ya\_ d4qwwa\_ d2ha2a\_ d1b9ra\_ d1offa\_ d3wcqa\_ d1e9ma\_  
d1l5pa\_ d1wria\_ d1i7ha\_ d3av8a\_ d1czpa\_ d1rfka\_ d3p1ma1 d3b2ga\_  
d2bt6a2 d4iuaa3 d4bvva\_ d5hpga\_ d3k65a\_ d1ki0a3 d1ki0a2 d1ki0a1  
d1a0ha1 d1pmla\_ d3sp8a3 d2feba1 d1f74a\_ d3l21a\_ d2e1da\_ d1to3a1  
d1w3ia\_ d1sfla\_ d1n7ka\_ d1vcva1 d4imea\_ d1wa3a\_ d2ocza1 d1f2ja\_  
d3m16a\_ d2yxga\_ d1ub3a\_ d3a5fa\_ d1fbaa\_ d1l6wa\_ d1xfba1 d1wx0a1  
d1vpxa1 d1ojxa\_ d1mxsa\_ d2a4aa1 d1xkya1 d3cq0a1 d3s1xa\_ d1f05a\_  
d1fdja\_ d3cpa1 d4d2ja\_ d4mh8a\_ d4i7ga1 d3rp2a\_ glucy.1 d1fuja\_  
d2zchp\_ d3w94a\_ d1si5h\_ d1lo6a\_ g2pka.1 d1cgha\_ d1kigh\_ d1a5ia\_  
d3s9ba\_ d1hj8a\_ d1ao5a\_ d2anya\_ d1q3xa1 d1gvza\_ dlazza\_ d4gsoa\_

d2f91a1 dliaua\_ dlgdna\_ dleufa\_ glfiw.1 dleq9a\_ d4nfea\_ d2rdla\_  
d1spja\_ dlelva1 d1a7sa\_ dlekbb\_ dlpfxc\_ dlyc0a\_ d2aiqa\_ glfiz.1  
d1fi8a\_ d4k60a\_ d4dgja\_ d1mzaa\_ dlop0a\_ d3tjva\_ d1pytd\_ d1sgfg\_  
g1gg6.1 d2eeka\_ glrtf.1 d1a0ja\_ d3g01a\_ d1pytc\_ d4e7na\_ d1ddja\_  
d1z8ga1 d2hlca\_ d1npma\_ d1brup\_ g1jou.1 d1sgfa\_ d1autc\_ g2hnt.1  
g1kdq.1 d1orfa\_ d3s69a\_ d4crga\_ d1fxya\_ d1bqya\_ d2ftba\_ d1pmpa\_  
d2rcqa1 d1fdqa\_ d4lkpa\_ d1sa8a\_ d1vyfa\_ d1lpja\_ d3vg7a1 d4azqa1  
d1o8va\_ d5bvqa\_ d1p6pa\_ d2qo4a\_ d1opba\_ d1yiva1 d1o1va\_ d4bvma1  
d4tkba\_ d4i3ba\_ d1bwya\_ d1ftpa\_ d4gkca\_ d1cbia\_ d3p6da1 d1kqwa\_  
d2a0aa1 d1m41a\_ d2bk7a\_ d3fjua\_ d1z5ra1 d1kwma1 d1uwy2 d1jqga1  
d2c1ca1 d1dtda\_ d1h81a2 d3lgia\_ d3i77a\_ d2z9ia2 d4nsva\_ d1lcya2  
d4jcna\_ d1agja\_ d1os8a\_ d1hpga\_ d1p3ca\_ d1l1ja\_ d1qtfa\_ d1e69a\_  
d1mv5a\_ d3g60a4 gl1i8.1 d1ewqa2 d1ji0a\_ d1qhla\_ d1v43a3 d2wmfa1  
d1vpla\_ d1g2912 d4a82a2 g1f2t.1 d2d62a1 d3tuic1 d2bb5a1 d3g60a3  
d2ixea\_ d1g6ha\_ d1sgwa1 d2qi9c\_ d3rlfa1 d3b60a1 d3d31a2 d2pzea1  
g1xew.1 d1jj7a\_ d1oxxk2 d2onka1 d1wlwa\_ d1iwea\_ d1qf5a\_ d1vmaa2  
d1nija1 d1np6a\_ d2p67a1 d3ihla\_ d1okkd2 d1ls1a2 d1s1ma2 d1iona\_  
d2v40a\_ d1dj3a\_ d3hida\_ d2vol1a1 d2g0ta1 d1vcoa2 d1j8mf2 d1g3qa\_  
d1xjca\_ d1qzxa3 d1ihua2 d1ihua1 d2qm8a\_ d1dj2a\_ d4ioja\_ d1cp2a\_  
d1yrba2 d1hyqa\_ d3gqba2 d1skye3 d1xp8a1 d1tf7a2 d1tf7a1 d1ye8a1  
d1skyb3 d2qe7d2 d4blta\_ d4huta\_ d3ldaa2 d4hyya\_ d2i3ba1 d1cr1a\_  
d3j9tb2 d3ntua2 d1vdza1 d2z43a\_ d1e9ra\_ d1nlfa\_ d3ziaa2 d1n0wa\_  
d1g6oa\_ d3ziad2 d3j9ta2 d1pzna2 d3gqbb2 d2i49a\_ d1nnfa\_ d1xvxa\_  
d1ursa\_ d1h3da1 d1iuda\_ d4m1va1 d1twya\_ d3e13x\_ d2nxoa1 d4pfua\_  
d3ttma\_ d1elja\_ d2qmwa1 d1us5a\_ d1y3na1 d1jeta\_ d1uqwa\_ d4f19a1  
d2esna2 d3thia\_ d3fasa1 d2uyeb\_ d2xwva1 d1r91a\_ d2fyia1 d1pb7a\_  
d2ozza1 d1sw5a\_ d1nh8a1 d1vr5a1 d2g29a\_ d1xs5a\_ d3lswa\_ d2z23a\_  
d3w9va\_ d3tcha\_ d1q35a\_ d1z7me1 d3q27a\_ d1p99a\_ d1ve4a1 d2i6ea1  
d4mcoa1 d4n8ya\_ d1eu8a\_ d1zbma1 d1hsla\_ d1ixca2 d1j1na\_ d1xvya\_  
d1y9ua\_ d2z22a1 d1xoca1 d4oera\_ d1wdna\_ d5f1qa1 d1xt8a1 d4gwoa\_  
d4igta1 d1pc3a\_ d4mmpa1 d1o63a\_ d2czla1 d2onsa2 d4mija1 d1eh3a\_  
d3skpa\_ d1dtza1 d1dtza2 d1ieja\_ d1jnfa2 d1ce2a1 d1jnfa1 d1b1xa2  
d1jw1a1 d1jw1a2 d1ryoa\_ d1h76a1 d1h76a2 d1c4oa1 d2p6ra3 d2p6ra4  
d1oywa2 d1oywa3 d1wrba1 d1w36b2 d1w36b1 d1c4oa2 d3bora\_ d1t6na\_  
d2eyqa5 d2eyqa3 d2eyqa2 d2zu6a2 d1veca\_ d1uaaa1 d1w36d1 d2g9na1  
d1z3ix2 d2rb4a\_ d1hv8a1 d1hv8a2 d1t5ia\_ d1w36c2 d2j0sa2 d2j0sa1  
d1fuka\_ d3hjha1 d1z5za1 d1qdea\_ d1z63a1 d1s2ma2 d1s2ma1 d1wp9a1  
d1wp9a2 d1gm5a3 d1gm5a4 d3dina4 d3dina3 d1q0ua\_ d1w36c1 d1z3ix1  
d1nkta3 d1nkta4 d1uaaa2 d1w36d2 glqhh.1 d2fwra2 d2fwra1 d2v8ta\_  
d3q3ma\_ d1za0a1 d1mxra\_ d2inca\_ d1jk0a\_ d2incb\_ d1mhyb\_ d3hf1b\_  
d1mtyb\_ d1r2fa\_ d2uw1a\_ d1mhyd\_ d3n37a\_ d1oquc\_ d1syya\_ d1mtyd\_  
d2o1za\_ d1uzra\_ d1smsa\_ d2fkza\_ d1zuja1 d1s3qa1 d2fjca1 d1z6om1  
d1veia\_ d4dyya\_ d1jiga\_ d3gvya\_ d2pyba\_ d4cy9a1 d3bvfa1 d1r03a\_  
d2cf7a\_ d1nf4a\_ d1zs3a1 d4iwka\_ d3ka8a\_ d3np0x\_ d1n1qa\_ d1lb3a\_



d4e6ka\_ d1z6oa1 d2fzfa1 d4dyua\_ d3ge4a\_ d4am4a\_ d2z6ma\_ d1ji5a\_  
d1vlga\_ d1lkoa1 d1krqa\_ d3qz3a\_ d1o9ra\_ d2ffxj\_ d1euma\_ d1yv1a1  
d2v2pa\_ d1j30a\_ d4di0a\_ d1dpsa\_ d1oewa\_ d2qzxa\_ d2asia\_ d1psoe\_  
d1smra\_ d2h6ta\_ d1pfza\_ d1lizda\_ d3hd8a\_ d1j71a\_ d1dpja\_ d4aa9a\_  
d1t6ex\_ g1b5f.1 g1lya.1 g1htr.1 d1qdma2 d1bxoa\_ d1wkra\_ d1tzsa\_  
d1libqa\_ d2qzwa\_ d1bdqa\_ d3ggta\_ d3ixoa\_ d1mrxa\_ d2haha\_ d1tw7a\_  
d4njsa\_ d1sgua\_ d2p3da\_ d1nsoa\_ d3d3ta\_ d2rkfa\_ d1c6ya\_ d2rspa\_  
d3ogpa\_ d3ekwa\_ d2o4na\_ d2j9ja\_ d1baia\_ d3ggua\_ d3lzua\_ d4npua\_  
d4j55a\_ d2r8na\_ d2fxda\_ d2p3ca\_ d4dqa\_ d3ttpa\_ d3t3ca\_ d2p3aa\_  
d2hc0a\_ d2fdda\_ d3mwsa\_ d1k8rb\_ d1wgra1 d1ef5a\_ d1wfyal d1e8ya3  
d1wgya1 d1lfda\_ d2cs4a1 d1wxma1 d2byeal d3kh0a1 d2byfa1 d1wxaa1  
d1e7ua3 d1h4ra3 d4y18a1 d2a16a3 d1wgda1 d1wggal d4q5eb\_ d1wjna1  
d1se9a\_ d3n3kb\_ d1wz0a1 d1we6a1 d2m0xa\_ d2gbka\_ d3rt3b1 d1wh3a1  
d1sifa\_ d2ekec2 d4ii2b1 d4hk2a1 d1c3ta\_ d1m94a\_ d1wgha1 d1ttna1  
d1j8ca\_ d1wx8a1 d3v6cb1 d2ma9b\_ d4i61b1 d1bt0a\_ d2jvca1 d1iyfa\_  
d2k1fa\_ d1wxva1 d1wf9a1 d1t0ya\_ d2io0b2 d1x1ma1 d2gbma\_ d1zw7a1  
d2m17a\_ d1ud7a\_ d1we7a1 d2l1wpa\_ d2gbja\_ d1wjua1 d1v6ea1 d1v86a1  
d4eewa\_ d1wiaa1 d4icva\_ d4gu2a\_ d1wx7a1 d1wy8a1 d4hjka1 d2faza1  
d1v5oa1 d1dszb\_ d3cbba\_ d1ynwa1 d1r4ia\_ d1hcqa\_ d2hana\_ d2hanb\_  
d2enva1 d1kb4b\_ d2n11b\_ d1lo1a\_ d1cita\_ d1ixza\_ d1qvra2 d1qvra3  
d1qzma\_ d1sxjc2 d1jr3d2 d2p65a\_ d1l8qa2 d1g8pa\_ d3hu3a3 d1sxjd2  
d1njfa\_ d1in4a2 d1sxja2 d1tuea1 d2ce7a2 d1w5sa2 d1sxjb2 d1d2na\_  
d1ny5a2 d1ofha\_ d2gnoa2 d2a5yb3 d1fnna2 d1u0ja1 d1lv7a\_ d1iqpa2  
d2fnaa2 d1ixsb2 d4gita\_ d1sxje2 d1g41a\_ d21j7a\_ d1n4na\_ d2m8bb1  
d2kyqa\_ d3psma\_ d1jkza\_ d1jxca\_ d2g11a\_ d1ugla\_ d4uj0a\_ d2k4ua\_  
d1hp2a\_ d2lu9a\_ d1baha\_ d2meoa1 d1wm7a\_ d1hlya\_ d1n8ma\_ d1jlza\_  
d1wpda\_ d1c55a\_ d1pvza\_ d1wt7a\_ d1rjia\_ d1wz5a\_ d1m2sa\_ d1pjva\_  
d1c49a\_ d1qkya\_ d2ktca1 d1wmta\_ d1j5ja\_ d1rlga\_ d1t0za\_ d2i61a\_  
d1t1ta\_ d1sn4a\_ d1kv0a\_ d2lkba\_ d1npia\_ d1wwna\_ d1pe4a\_ d2kbka\_  
d2li7a\_ d1djta\_ d2kbha\_ d1dq7a\_ d1sega\_ d1omya\_ d1zywa1 d1jzaa\_  
d2jcqa\_ d1bnla\_ d1dy2a\_ d1t61c1 d3ubub\_ d1qo3c\_ d1v7pa\_ d1tdqb\_  
d3ubua\_ d1c3ab\_ d1h8ua\_ d3bx4b\_ d1t8ca1 d1sb2a1 d1qdda\_ d2ziba1  
d3cada\_ d1byfa\_ d1j34b\_ d1jwia\_ d1jzna\_ d1c3aa\_ d1oz7b\_ d1wmza\_  
d3bdwb\_ d1hq8a\_ d1fifa1 d1dv8a\_ d3hupa\_ d1wk1a1 d1umra\_ d2afpa\_  
d3bx4a\_ d1gz2a\_ d1sl6a\_ d1v7pb\_ d3g8ka\_ d1ixxa\_ d1j34a\_ d1jwib\_  
d1g1sa1 d1y17a1 d1ja3a\_ d1fvub\_ d3bdwa\_ d1sb2b1 d1fvua\_ d1umrc\_  
d1oz7a\_ d4m17a\_ d3cfwa1 d1ypqa1 d1g1ta1 d3fd4a\_ d3l9jc\_ d4dn8a1  
d1v4lb\_ d1rd11\_ d2msba\_ d1rpma\_ d2shpa1 d1yfoa\_ d1l8ka\_ d2ooqa1  
d1g4us2 d1p15a\_ d1lara2 d1lara1 d1wcha\_ d2fh7a2 d2fh7a1 d1ohea1  
d1ohea2 d2f4da\_ d1rxda\_ d2hxpa\_ d1xria\_ d1fpza\_ d3ezza\_ d4y2ea\_  
d1i9sa\_ d3azya\_ d3wvja\_ d1upsa1 d1ajoa\_ d2hyka\_ d1ajka\_ d2vy0a\_  
d1o4ya\_ d3o5sa\_ d3d6ea\_ d3atga\_ d1dypa\_ d1umza\_ d3i4ia\_ d1c1la\_  
d4lbqa\_ d1a78a\_ d1slta\_ d4no4a\_ d3zsja\_ d3duia\_ d1g86a\_ d1is3a\_  
d1qmja\_ d1hlca\_ d1tdha3 d1q3ba3 d1ee8a3 d1k82a3 g1qmo.1 g1len.1

d3zyra\_ d1n47a\_ g2ltn.1 d1avba\_ d3usua\_ d1dhkb\_ d1f9ka\_ d1ukga\_  
d1g8wa\_ d1g9fa\_ d1wbfa\_ d3wcsa\_ d1g7ya\_ g1loe.1 d1mvqa\_ d1hq1a\_  
d1v6ia\_ d1dbna\_ d1qnwa\_ d1fx5a\_ d4l8qa\_ d1ioaa\_ d3n35a\_ d3ubra\_  
d1qo8a1 d1d4ca1 d2k3va\_ d1ft5a\_ d1qdba\_ d1m1qa\_ d2j7aa\_ d1h21a\_  
d1ogyb\_ d4fasa\_ d1jnia\_ d1oaha\_ d1sp3a\_ d1eysc\_ d2h0ba\_ d2erfa\_  
d1h30a1 d3mw4a1 d1pz7a\_ d2r1ba\_ d3v64a1 d1d2sa\_ d3bopa1 d3mw3a1  
d1okqa1 d1okqa2 d1wioa4 d1ccza2 d1vcaa1 d1dr9a2 d1ic1a1 d2d9qb1  
d2nxyb2 d1adqa1 d1fnga1 d1uvqb1 d1zs8a1 d2vola1 d2vola2 d1mfb12  
d2jelh2 d1uwel2 d3qq4b1 d1kjob\_ d1k5na1 d1osph2 d4odh12 d1ow0a1  
d1ow0a2 d1bfob2 d3l9ra2 d3jtth1 d2fath2 d4elkb2 d1fn4b2 d2xfxb\_  
d1pg7x2 d1cqka\_ d4k71b2 d1lk2a1 d1eapb2 d4lfhg2 d1i4fa1 d2nw2a2  
d1kfah2 d1mhca1 d1h3ua1 d1wejh2 d1h0db2 d1a5fh2 d1kcvh2 d1mjuh2  
d1qqda1 d1kcrh2 d1k8ia1 d3huja2 d2nnab1 d1nfd2 d3mffb2 d1s9va1  
d1lk3h2 d1q0x12 d1fv1b1 d1neza1 d4rfeb2 d1r3ha1 d1a6tb2 d1kjva1  
d1pz5b2 d1onqa1 d2bc4a2 d1de4a1 d1k8da1 d1tcra2 d1dn0b2 d1nfde2  
d2xwtb2 d1bfoa2 d1mexh2 d1iakb1 d1ypzf2 d4f7ea2 d1q72l2 d2fbjh2  
d1fe8h2 d1clzh2 d1fngb1 d1uvqa1 d1vgka1 d1c16a1 d4j12a2 d4x99b2  
d1igtb3 d1je6a1 d1q72h2 d1nldh2 d1teth2 d2hmic2 d1ilca2 d1ilca1  
d1k8ib1 d1q0yh2 d1kfa12 d3frua1 d1pg7w2 d1u58a1 d1igyb4 d1igyb3  
d1hyrc1 d1klub1 d1deeb2 d1c12b2 d2bc4b2 d2ig2h2 d1kcvl2 d3wn5b1  
d1lk2b\_ d1lk3l2 d1mjul2 d1sm3h2 d1q0xh2 d1zvsa1 d1ydpal d1u8ib2  
d1ypze2 d1kcuh2 d1op9a\_ d1y0la1 d1letzb1 d1egj11 d2gsib1 d1nj9a1  
d4jfhdl d1aqk11 d1t2ja\_ d1lo4h1 d1zvya1 d3v4vl1 d4enec1 d1kxtb\_  
d5e8ea1 d2pxya\_ d4weud\_ d1xiwc\_ d2esvd1 d1qnzh\_ d1ogae1 d1f4xh1  
d4n1hb\_ d3ezjb1 d3mlw11 d1kfah1 d1letza1 d1b4jh1 d3cfic\_ d4w68a\_  
d2arja1 d1ek3a\_ d2ok0l1 d1vera\_ d1uwgh1 d1blnb1 d1fpth1 d1rzga1  
d2giya1 d4m3kb1 d1nc2a1 d2nyyd1 d1ncna\_ d1fbih1 d5dxwa\_ d4fqqa1  
d1dqdh1 d1jfq11 d1kelh1 d1faih1 d1frgl1 d1figl1 d4m6n11 d1fo0a\_  
d4hxb11 d3b5ga\_ d3quyd1 d2h9gb1 d1i8kb\_ d2dd8h1 d2ck0h1 d1eaja\_  
d4w6wb1 d2a6ib3 d1t66d1 d2e27h\_ d1ob1b1 d1f11b1 d2v7na1 d1ad0a1  
d2xt1b1 d1pskh1 d4i13b1 d2op4l1 d1a0ql1 d1uwel1 d1za3a1 d1ncb11  
d4uu9a\_ d1bm3h1 d1cloh1 d1nqba2 d1cf8h1 d4y5va\_ d1mhph1 d5anma1  
d4cdgc1 d4ldeb\_ d1y0lb1 d2pcpb1 d1z3gl1 d1dfb11 d1fh5h1 d3g5xa1  
d1tzib1 d4dn3l1 d3zhka1 d2b1hh1 d2uylal d1f3dh1 d1nj9b1 d2agjh1  
d2h1pl1 d1q72h1 d8fabbl d1ndmb1 d1rjca1 d4u6hb1 d3upca\_ d2fbj11  
d1osph1 d1tvda\_ d2cjvh\_ d4fhd1 d1bd2d1 d1rz7h1 d3nn8a\_ d1blna1  
d1knoa1 d1nfda1 d2bmkb1 d1dq11\_ d1igyb1 d1igf11 d12e8h1 d3utza1  
d1nc2b1 d1rihh1 d4mwfb1 d4jvpa1 d1mieh1 d1rhfa1 d1fgn11 d1sbsh1  
d1lp9e1 d1dn0a1 d4lqf11 d1iaih1 d1kgcd1 d1mh5b1 d1gpol1 d2g60h3  
d1f8tl1 d2jixd1 d4grwh\_ d1fo0b\_ d1bfob1 d1axsa1 d1u9ka\_ d1nmbh\_  
d1h8na1 d1h8na2 d1jguh1 d4eura1 d3sdy11 d35c8h1 d1w72l1 d1mvub\_  
d1i9rh1 d1ob1a1 d4wenb\_ d1yeeh1 d3ietc1 d1f58h1 d1ad0b1 d1mqk1\_  
d1nbvh1 d4b50a\_ d3r8bb\_ d1baf11 d1mamh1 d4rgne1 d2gsgb\_ d35c8l1  
d1bafh1 d1ai1h1 d2pcpa1 d2fath1 d2x1pa\_ d1orsb1 d1libgl1 d1shma\_

d1a2yb\_ d1u0qa\_ d2coqa\_ d1hilb1 d1qfwi\_ d1jv5b\_ d1fn4b1 d5e0qa\_  
d1nsnh1 d1plgl1 d4ocxl1 d1kb5h1 d1rzfh1 d1pg7x1 d2fx7h1 d2oi9c\_  
d1l7i1l d3eyva1 d1d5i1l d4ffyl\_ d1tetl1 d1a6wh\_ d1ac6a\_ d3dvfa\_  
d1nfdel d1mimh1 d1ri8a1 d1jhlh\_ d3dura\_ d1fskb1 d1f97a1 d3so3b1  
d2ak4d1 d1lp9f1 d4z7wf1 d1l7th1 d4y5ya\_ d4x7ec1 d1emth1 d1ikfl1  
d1nlbh1 d4uta1l d1bjma1 d1eapb1 d1u6ah1 d2dtgd1 d1kj2b\_ d1xeda1  
d1cleh1 d1fgvh\_ d2bnub1 d2fb4h1 d2dtgb1 d1ktrh\_ d1jpth1 d1qkzl1  
d4hepg\_ d2atpb1 d1flrh1 d2hrpl1 d1mvfa\_ d1iaim1 d3k80a1 d2jb5h1  
d3zkxc\_ d4grwe\_ d1it9h1 d1rhhb1 d3w9ec\_ d1e4wh1 d1sy6h1 d2j6eh1  
d3qxta\_ d1jglh1 d1p7ka1 d1tzhb1 d4n8pa1 d1gaf1l d2jelh1 d1wioa2  
d4i0cc1 d1cicb1 d1lmka2 d1lmka1 d1iqwh1 d1lorqb1 d1ejoh1 d1jnlh1  
d4zg1a\_ d43c9b\_ d1ggb1l d1wejh1 d3q6fa1 d1f3dj1 d3c6la1 d1bqlh1  
d3p9wb\_ d1a3r1l d1h0db1 d2uzil\_ d1leo8l1 d1qfwl\_ d1n7ml1 d1igja1  
d1c5ch1 d2a9mh\_ d1fj1b1 d4heme\_ d1ccza1 d1a5fh1 d1logad1 d1dlfh\_  
d1qa9b\_ d1vge1l d3qskb\_ d1sjxa\_ d4ozfg1 d1sq2n\_ d1qd0a\_ d1kcvh1  
d1c5db1 d3qcul1 d8faba1 d3bn9d1 d1mjuh1 d4y8dc\_ d7fabh1 d3dvgb1  
d1l00l1 d1a6tb1 d1gigh1 d1kcrh1 d2hwz1l d1yjdc1 d3clfl1 d4krna\_  
d1dl7l\_ d1e6o1l d1mexh1 d3r0ma\_ d4kkna\_ d1fns1l d1loaqh\_ d1rzial  
d1ucbh1 d1ncw1l d4b41a\_ d1nfdfl d2mpah1 d2d7t1l d4grwf\_ d4b5ea\_  
d1l3k3h1 d3u79a\_ d4u3xa\_ d1ghfl1 d1bvkb\_ d1mcww1 d1b88a\_ d1jrhh1  
d32c2b1 d4wemb\_ d1dsfh\_ d1op3h1 d1ce1l1 d1iqda1 d1qoka1 d1qoka2  
d1qfuh1 d2crya1 d1ay1h1 d1oaql\_ d3ab0b\_ d1rurl1 d1t4kb1 d1bz7b1  
d1n0xh1 d1for1l d1lucb1l d4w6yb\_ d43c9a\_ d2aab1l d1tzial d4n1ca\_  
d1k6qh1 d3g9ab\_ d4tvsa1 d1lghm\_ d1pz5b1 d3dx9a1 d3wxwh\_ d1nakh1  
d1kcull d3eaka\_ d4qlra1 d1cr9l1 d1d9ka\_ d1f4x1l d1deea1 d2i27n2  
d1c12a1 d2orbl1 d1j8hd1 d1mcph1 d1c5da1 d1kenh1 d1bd2e1 d1h5ba\_  
d4x7fc1 d3upaa\_ d1t3fa1 d1indh1 d2dtgc1 d4hc1l1 d1zv5a1 d4wgvb\_  
d1uwgl1 d4f37k1 d1aqkh1 d1vesa\_ d3zkqd\_ d1fpt1l d1l04l1 d1knob1  
d3rrqa\_ d1ct8b1 d4orz\_ d1mlbb1 d4hgkc1 d1dqd1l d1bogb1 d4ozhe1  
d1dr9a1 d1i7za1 d1dn0b1 d1kell1 d1rzib1 d1ypzf1 d1wtla\_ d1hkfa\_  
d1fail1 d1figh1 d2vyre\_ d1sjva\_ d1ohqa\_ d1bfoa1 d1pkqb1 d1mjul1  
d1b4jl1 d1nsn1l d2arjb1 d1p4bh\_ d4aj0a\_ d3nn8b\_ d2rcja1 d1f2xk\_  
d4v1dd\_ d1adqh1 d2eksa\_ d4k3ga\_ d1jfqh1 d1uweh1 d1frgh1 d4gftb\_  
d1uz8b1 d4n1ea\_ d1bm3l1 d1clol1 d3mcka1 d2vqla1 d1ae6h1 d4aq1b1  
d1uj3b1 d1nbqa1 d1fh5l1 d2ck0l1 d2ywza\_ d1q72l1 d4nxbx\_ d1hila1  
d4hzb1l d2j88l1 d1zmya1 d1cd0a\_ d1a4ka1 d1psk1l d1a0qh1 d4krmb\_  
d1ncbh1 d2fbjh1 d1j8he1 d1i3ua\_ d1cf8l1 d1fe8h1 d2p1ya1 d1eeqa\_  
d2x89a\_ d1o10a\_ d2r0lh1 d1ub5a1 d1dfbh1 d3eyvb1 d4jdvb1 d4p2cg\_  
d2gsia1 d2agjl1 d1u3ha1 d2h1ph1 d1rihl1 d1fskc1 d1boga1 d2a77l1  
d1osp1l d1qfoa\_ d3dwta\_ d2fx7l1 d1rz7l1 d3stba1 d1pkqa1 d1b6da1  
d1dzba2 d1dzba1 d1kj2a\_ d4l1ha\_ d1rzgb1 d1dq1h\_ d12e8l1 d1mie1l  
d1jmaa\_ d1sbs1l d1fgnh1 d1f58l1 d1mqkh\_ d1ndgb1 d3qegl1 d1iaill  
d2aw2a1 d1tqbc1 d3fo2a1 d4dkaa\_ d1f8th1 d2g60l1 d2ywy\_ d1uj3a1  
d1yc7a\_ d3bd3a\_ d4w6xb1 d1nmb1\_ d1i8ka\_ d1rjlb1 d1ypze1 d1p7kb1

d1kxqe\_ d1gpoh1 d2z4qa1 d1w72h1 d1i9r11 d4qgya1 d4xt1c\_ d2qqnh1  
d1cica1 d3c08h1 d2cd0a\_ d2bdnh1 d1hnga1 d1mam11 d1nldh1 d1cr9h1  
d41cih1 d3bkyh1 d3qg7l1 d1ai111 d1kxvc\_ d4iosd\_ d117ih1 d2x1qa\_  
d1ub6b1 d3k74b\_ d1libgh1 d1teth1 d1igy1 d1hxma1 d2x6ma\_ d2e71a\_  
d5e03a\_ d1qfwm\_ d2r0kh1 d1igjb1 d1rurh1 d1plgh1 d1mj8h1 d1yuhb1  
d3fmg11 d1rzf11 d1emt11 d1ad9b1 d1igtb1 d1nlb11 d1d5ih1 d3k7ua\_  
d4ffyh\_ d1bwwa\_ d3dvga1 d1a6ta1 d1fgvl\_ d4qxgl1 d1mim11 d1jhl1\_  
d2hffb1 d2hh011 d1qkzh1 d117t11 d1afvh1 d1iaii1 d2cjuh\_ d1um5h1  
d2ghwb2 d2ghwb1 d1kgce1 d2fgwh1 d1ikfh1 d1dvfd\_ d2i24n1 d2xtjb\_  
d1za3b1 d2yc1a\_ d2hh0h1 d2x1oa\_ d1bvka\_ d1rjla1 d5e7ba1 d1igta1  
d1i11b1 d2fb411 d1mvua\_ d1jpt11 d32c2a1 d1fvca\_ d1iqdb1 d2hrph1  
d2p4ab\_ d4qo1a\_ d1p2cb1 d1wt5c\_ d1t4ka1 d5c1mb\_ d1it911 d1bz7a1  
d1b2wh1 d1e4wl1 d1jnl11 d1yedb1 d1za6b1 d3u7aa\_ d1igfh1 d3gnml1  
d1orsa1 d1wejl1 d1a2ya\_ d1hxmb1 d1gafh1 d2j4wh1 d1pz5a1 d1j05a\_  
d1a3rh1 d4fq111 d1qfwh\_ d1eo8h1 d1n7mh1 d4s11a\_ d1kegh1 d5da4a\_  
d1iqw11 d3whxb1 d1vgeh1 d1deeb1 d1c12b1 d1t2ql1 d1ad9a1 d3gsnb1  
d3b2uc1 d1ggbh1 d1t3fb1 d1nak11 d4ocmc\_ d1lila1 d2v7hb3 d2esve1  
d1mcoh1 d2qr0b1 d2q3aa\_ d1ct8a1 d1kcr11 d2pxyb\_ d2uzih\_ d5c3ld\_  
d3durb\_ d1c5c11 d2ak4e1 d1d17h\_ d1xiwd\_ d1mlba1 d1rmf11 d1i7zb1  
d1dlf1\_ d2xa3a\_ d5bq7b1 d1dqqb1 d3h4211 d1egjh1 d1kcv11 d1fe811  
d2j6e11 d1f3rb2 d11k311 d1sm3h1 d1q0xh1 d1ghfh1 d7fab11 d1igch1  
d11o0h1 d4idla\_ d5c2b1\_ d1jrh11 d1i11a1 d3zhda1 d4kfzc\_ d1b0wa\_  
d1e6oh1 d1mex11 d4krpb\_ d1fnsh1 d1ncwh1 d4hgma\_ d4eigb1 d4rzca\_  
d2mpa11 d4y5xa\_ d5en2b1 d3lrga1 d4ej1c1 d1rhha1 d1j05b\_ d1forh1  
d1q9wb1 d2wzpd\_ d2aq2a1 d1h0da1 d3revb1 d2ij0c1 d1tzha1 d4m7j11  
d1k6q11 d3b9kc1 d1igml\_ d3qeua1 d1dsf1\_ d1celh1 d1kcu11 d1zvha1  
d1zvoa1 d1tqbb1 d1ay111 d2qsc11 d2cgrh1 d1n10h1 d1ken11 d3eo0a1  
d4n9ob1 d1n0x11 d3k1kc\_ d1c4qa\_ d1prt11 d2wv6d\_ d1prt1f\_ d1l1trd\_  
d4163b1 d1r4pb\_ d1t10f\_ d2bosa\_ d1prt1b1 d3chbd\_ d2aq2b1 d1ck1a1  
d1enf11 d1i4pa1 d1v1oa1 d1et9a1 d1esfa1 d2g9hd1 d4ohja1 d1klud1  
d1bxta1 d1eu3a1 d1ty0a1 d1fnua1 d2cqva1 d1fhga\_ d2k1ma\_ d2d12a1  
d1biha3 d1biha1 d1biha4 d3qp3a1 d1g1ca\_ d1cvsc2 d1cvsc1 d1xmwa2  
d1m4ka2 d2otpa2 d1biha2 d1rhfa2 d2fcba2 d2fcba1 d1wwbx\_ d1gsma2  
d1epfa1 d1epfa2 d2dava1 d1waaa\_ d1f97a2 d1x44a1 d1vcaa2 d1fnla2  
d1fnla1 d3b5ha2 d3h8na2 d3h8na1 d1bjba1 d1bjba2 d1pd6a\_ d1f2qa2  
d1f2qa1 d3cx2a\_ d1nbqa2 d3b5ha1 d1n26a1 d1xiwb\_ d1xaua\_ d1fltx\_  
d2ifga1 d1olla1 d1olla2 d1cs6a4 d1cs6a3 d1cs6a2 d1cs6a1 d2gw5a2  
d1sy6a1 d1xiwa\_ d1lucta2 d1lucta1 d1ry7b2 d1gl4b\_ d1qz1a3 d1olza1  
d2c9aa1 d1wwca\_

**Family-32 (b.40.4.5)**

**Positive dataset contains 41 protein sequences.**

d1y14b1 d2nn6i1 d1i941\_ d2zjra2 d1smxa\_ d2qamc2 d2r7da1 d1wfga1  
d3bzka4 d1x6oa2 d3a0ja\_ d2j01d2 d2ja9a1 d4q15a\_ d2n3sa\_ d2vnud1  
d2nn6h1 d2mo1a\_ d2ix0a3 d2ix0a2 d2lxja\_ d1ueba3 d1ueba2 d2z0sa1

d1u0la1 d2ix0a1 d2je6i1 d3i2za1 d2c35b1 d2ahob2 d1t9ha1 d3i4oa\_  
d2qall1 d2nn6g1 d3cama\_ d2ba0a1 d2vnud2 d2vnud3 d2qalq1 d1wi5a1  
d1xtda2

**Negative dataset contains 3939 protein sequences.**

d1c7ga\_ d2v1pa1 d2ez1a\_ d4nmwa\_ d2bnma2 d1xkla\_ d2wfla\_ d1js3a\_  
d3rcha\_ d3k40a\_ d2cfba1 d1o69a\_ d1bj4a\_ d3k28a\_ d2bwpa\_ d3lg0a\_  
d2fnua\_ d3ou5a\_ d1z7da1 d1b9ha\_ d1iaya\_ d4msoa\_ d1bs0a\_ d1s0aa\_  
d1sffa\_ d3tqxa\_ d1mdoa\_ d3qboa\_ d3pgya\_ d1bjna\_ d2dkja\_ d1ejia\_  
d1vefa1 d4wxga\_ d3bs8a\_ d3gbxa1 d1w23a\_ d1qnia1 d1fwxa1 d2wo3b\_  
d1shxa\_ d1f56a\_ d1bypa\_ d1azca\_ d1ws8a\_ d3u25a\_ d1cuoa\_ d1id2a\_  
d1rkra\_ d2iaac\_ d4dp1x\_ d1nwpa\_ d2gima\_ d2i7sa\_ d1qhqa\_ d3ehbb1  
d1fftb1 d1gyca3 d1hfua2 d1kbva1 d1kbva2 d1sdda1 d1sdda2 d1gyca1  
d1gyca2 d1mzya1 d2bw4a1 d1aoza1 d1aoza3 d1aoza2 d1kyaa2 d1kyaa1  
d1mzya2 d4e9sa1 d1sddb1 d1sddb2 d1hfua1 d1hfua3 d1oe1a2 d1oe1a1  
d1v10a2 d1v10a3 d1v10a1 d2dara2 d2dara1 d1wyha2 d2dloa2 d1rutx4  
d1rutx3 d2cuqa2 d1x4la2 d1x4la1 d1x3ha2 d1x3ha1 d2d8za1 d1x61a2  
d1x6aa1 d1x6aa2 d2cora2 d2cora1 d1v6ga1 d1v6ga2 d2d8za2 d1x64a1  
d1x64a2 d1b8ta1 d2co8a1 d1x63a2 d2dj7a2 d2dj7a1 d2cu8a2 d2cu8a1  
d1g47a2 d1g47a1 d1j2oa1 d1wyha1 d2dloa1 d1wiga1 d1wiga2 d2cupa2  
d2cupa3 d1x68a1 d2d8ya2 d2d8ya1 d1m3va2 d1x62a1 d1x68a2 d1x61a1  
d1b8ta3 d1b8ta2 d2d8xa2 d2d8xa1 d1x4ka1 d1x4ka2 d2cuqa1 d1m3va1  
d2co8a2 d1j2oa2 d1x63a1 d2cura1 d2cura2 d1x62a2 d1iknc\_ d3brda1  
d1p7h11 d1oy3c\_ d1imhc1 d1gjia1 d1zk9a1 d2cxka1 d2bema\_ d1pama1  
d1ea9c1 d1qhoa1 d2fhfa2 d2fhfa1 d1k3ia1 d1j0ha1 d1cxla1 d2bhua1  
d1edqa1 d1f1sa2 d1ut9a2 d1gvia1 d1txka1 d4alac\_ d1pjwa\_ d1rera1  
d1s6na\_ d3uzqb\_ d2phla2 d2phla1 d1fxza2 d1fxza1 d1lrha\_ d1uija1  
g1dgw.1 d2v09a\_ d1uika2 d1uika1 d1dgwa\_ d2pa7a1 d1wlta1 d1nxma\_  
d2c0za1 d1nepa\_ d1ds6b\_ d1fstb\_ d1ex0a1 d1g0da1 d3us3a3 d3us3a1  
d1eixa\_ d3exra\_ d2ffca1 d2fdsa1 d3n3ma1 d2czda\_ d2yyua\_ d1vqta1  
d1dbta\_ d3ldva1 d2bjca1 d2hsga1 d1qpza1 d1k9ua\_ d2opoa\_ d1r0ka3  
d1j5pa3 d1vkoa2 d1vm6a2 d3qvsa2 d1gr0a2 d1p1ja2 d2ovga\_ d1sq8a\_  
d1rzsa\_ d3kz3a\_ d3orca\_ d3gpdg2 d2q49a2 d1hdgo2 d2g17a2 d2cvoa2  
d2czca1 d3pwka2 d1obfo2 d1i32a2 d1zyao2 d2pkqo2 d1b7go2 d2hjsa2  
d1cf2o2 d1vkna2 d1nvmb2 d1ux8a\_ d1dlya\_ d4i0va\_ d2bkma\_ d1dlwa\_  
d2bmma\_ d2msya\_ d2djoa1 d2r5za\_ d1au7a1 d1f43a\_ d2lmda1 d1akhb\_  
d1s7ea1 d3nara\_ d1zq3p1 d2craa1 d1mija\_ d4uuta\_ d3a01a\_ d1x58a1  
d3rkqa1 d3cmya1 d2cqxa1 d2da6a1 d1e3oc1 d1mh3a1 d1ig7a\_ d1x41a1  
d1wh7a1 d1gt0c1 d2mw8a\_ d1lfup\_ d1x2ma1 d1b72a\_ d1wi3a1 d1jgga\_  
d1wjha1 d1x2na1 d1mnmc\_ d2cuea1 d3k2aa\_ d2hosa\_ d2jwta2 d1pufa\_  
d1octc1 d2hi3a\_ d1b8ia\_ d4j19a\_ d3lnqa\_ d1wh5a1 d1b8ib\_ d1fexa\_  
d2cqra1 d1guua\_ d1ug2a1 d2cqqa1 d2ajea1 d4a69c\_ d2crga1 d2iw5b1  
d1xc5a1 d1ofcx1 d2cu7a1 d1wgxa1 d2cjja1 d2ckxa1 d1gvda\_ d6paxa1  
d6paxa2 d1k78a2 d1ligna1 d1prtc2 d3lv8a\_ d1s3ga1 d1zaka1 d1s4qa\_  
d3tvta2 d1uf9a\_ d1khta\_ d1ckea\_ d1osna\_ d1p5zb\_ d4tmka\_ d3cm0a\_

d1jaga\_ d3h86a\_ d1t0hb\_ d1nn5a\_ d2h92a\_ d3kb2a1 d2c95a1 d1yj5a2  
d1kgda\_ d1ly1a\_ d2ak3a1 d1vyva2 d1deka\_ d2grja1 d1p3ja1 d1y63a\_  
d1e4ya1 d1s96a\_ d3iija1 d1lvga\_ d1nksa\_ d1vyua2 d4e22a\_ d1qf9a\_  
d1jjva\_ d1q3ta\_ d1ki9a\_ d1lw7a2 d1teva\_ d1kjwa2 d1gsia\_ d2iyva2  
d1kaga\_ d1viaa\_ d1e6ca\_ d1x6va3 d1g3ma\_ d1t8ta1 d1nsta\_ d1fmja\_  
d1zrha\_ d1ls6a\_ d2a3ra\_ d1aqua\_ d2zptx\_ d3ckla\_ d1teta\_ d1q44a\_  
d2gwha\_ d1odfa\_ d1uj2a\_ d4gi7a\_ d2jeoa1 d1rz3a\_ d1mdwa\_ d1qxp4  
d1ziva1 d1zcm1 d1z0ja1 d3umra2 d3gj0a1 d2gaoa1 d1yzga1 d1x3sa1  
d1g7sa4 d1puja\_ d1udxa2 d1kk1a3 d2o52a\_ d1jwyb\_ d1zcaa2 d1zcba2  
d2fv8a1 d2cjwa\_ d3dz8a1 d1xzpa2 d1vg8a\_ d4qxaa\_ d2ew1a1 d1x1ra1  
d2bcgy\_ d3doea1 d3cona\_ d3rega\_ d3wyga\_ d1upta\_ d2b6ha1 d1zd9a1  
d1lnza2 d1r5ba3 d1n0ua2 d1r2qa\_ d2f91a1 d2rhda\_ d3q3jb\_ d3q85a\_  
d1efma1 d1r8qa\_ d2gf9a1 d2akab1 d1ek0a\_ d1z08a1 d2gcoa1 d2dyl2  
d4g01b\_ d2cxxa1 d1svia\_ d3q72a\_ d1ni3a1 d4ac9a4 d2erxa1 d2bmea\_  
d1wxqa1 d2gf0a1 d41dja1 d1zunb3 d1d5ca\_ d4lv5b\_ d1efca3 d1kmqa\_  
d2g6ba1 d3lrpa\_ d1tada2 d2y8ea\_ d4rd4a1 d1z06a1 d2heia\_ d3a58b\_  
d1u0la2 d1d2ea3 d1zj6a1 d2ocba\_ d3rwoa\_ d1mr3f\_ d2e9sa1 d4u5xa1  
d2iwra\_ d2fn4a1 d3bwdd\_ d2nzja1 d2atva1 d2ksqa\_ d3l43a\_ d1mkya2  
d1mkya1 d1wmsa\_ d1jn3a3 d2rmka\_ d1f6ba\_ d1f60a3 d1gota2 d1jala1  
d2fh5b1 d1g16a\_ d2wblc\_ d1m7ba\_ d1wf3a1 d1f5na2 d1t9ha2 d1z6xa1  
d1z0aa1 d2fg5a1 d2a5ja1 d2bcjq2 d1s0ua3 d1ky3a\_ d4y0va\_ d4lhwa\_  
d2qmea1 d2atxa1 d1egaa1 d1ryha\_ d1moza\_ d1nrjb\_ d2erya1 d3bfka\_  
d1puia\_ d1fzqa\_ d3j3az1 d3t5ga\_ d1shza2 d3defa\_ d2f7sa1 d3raba\_  
d3tsoa\_ d3aq4a\_ d2a17a1 d3sfva1 d3bc1a\_ d2ncda\_ d1sdma\_ d3h4sa1  
d2heha\_ d2grya\_ g3kin.1 d1kk8a2 d1br2a2 d1goja\_ d1f9va\_ d2mysa2  
d1lkxa\_ d3t0qa\_ d4db1a1 d3gbja\_ d1ry6a\_ d1v8ka\_ d1y4wa1 d3vrda1  
d3vrda2 d1fcdc1 d1h1oa2 d1h1oa1 d1m70a2 d1m70a1 d1ig8a1 d1czan2  
d1czan3 d1czan1 d1ig8a2 d1czan4 d1bg3a4 d1bg3a3 d1bg3a1 d1nira1  
d1qksa1 d1hroa\_ d4gedb\_ d3zooa\_ d1mz4a\_ d1gu2a\_ d1f1fa\_ d1dvva\_  
d1c6ra\_ d1c75a\_ d1e29a\_ d1gdva\_ d1cnoa\_ d1h32b\_ d1co6a\_ d2bh4x\_  
d2aiua\_ d5cytr\_ d1jdl1a\_ d1i8oa\_ d2zboa\_ d3dmia\_ d1ls9a\_ d1wvec\_  
d2yk3a\_ d3ph2b\_ d1dw0a\_ d5aura\_ d1q13a\_ d1qn2a\_ d1f1ca\_ d2nqya\_  
d1h4ga\_ d1hixa\_ d1oa2a\_ d3b7ma\_ d4h7ma1 d3wp3a\_ d2vgda\_ d1igoa\_  
d3zsea\_ d2nlra\_ d3wx5a\_ d1oa3a\_ d1pvxa\_ d1m4wa\_ d1f5ja\_ d1oa4a\_  
d1ks5a\_ d4ixla1 d2ah2a1 d1n1ta1 d1evsa\_ d1cnt1\_ d1pvhb\_ d1z7ca\_  
d1huwa\_ d1bgea\_ d1rhga\_ d1f6fa\_ d1f45b\_ d1ilrb\_ d1axia\_ d1etea\_  
d3tgxb\_ d1scfa\_ d2z3qa1 d3qb1a\_ d1hula\_ d1m48a\_ d4nkqb\_ d1eera\_  
d5e4ea\_ d2o27a\_ d3b5ka\_ d2psma1 d4zf7a\_ d3uf5a\_ d4x51a\_ d1d9ca\_  
d4ypgc1 d3oq3a\_ d1n1fa\_ d1aula\_ d1wu3i\_ d3bes1\_ d3ux9a\_ d1mixa2  
d1e5wa2 d1j19a2 d1isna2 d2a16b2 d4dnxa2 d1v47a2 d1g8fa2 d1jhda2  
d1x6va2 d2el7a\_ d1irxa2 d1r6ta2 d1ivsa4 d2cyba\_ d1rqga2 d1j09a2  
d2yxna\_ d1f7ua2 d1h3fa1 d1ffya3 d2g36a1 d1nzja\_ d1jila\_ d1n3la\_  
d1i6la\_ d1pfva2 d1h3na3 d3n9ia\_ d3sz3a1 d3sw2a\_ d1moxc\_ d1dx5i3  
d1edmb\_ d1aut12 d1aut11 d1nqlb\_ d1dval1 d1szba2 d1kigl\_ d2y5fl\_

dlijqa2 d1gk5a\_ d1g1sa2 d1nt0a3 d1xdtr\_ d1lmja2 d1lmja1 d1nzia2  
d2wphe\_ d1klil\_ d1pfxl2 d1pfxl1 d1p9ja\_ d1g1ta2 d1f7ea\_ d4yzub\_  
d2mgpa1 d1b9wa1 d1b9wa2 d2mgpa2 d1ob1c1 d1ob1c2 d1n1ia2 d1n1ia1  
d2npra2 d2npra1 d2y5ia\_ d1qlsa\_ d1psra\_ d3n22a\_ d2egda\_ d4ggfc\_  
d2wcea\_ d2luca\_ d4aqia\_ d3nsia\_ d2lp3a\_ d1j55a\_ d1a4pa\_ d1k8ua\_  
d1nsha\_ d1exra\_ d1tiza1 d1nyaa\_ d1g8ia\_ d1ggwa\_ d1wdcc\_ d3fwba\_  
d1ggza\_ d2o5ga\_ d1ctaa\_ d1m45a\_ d3i5gc\_ d1sl8a\_ d1fpwa\_ d2scpa\_  
d2roaa\_ d4aqra\_ d3pn7b\_ d1br1b\_ d2mysb\_ d1s6ca\_ d1bjfa\_ d2obha\_  
d1jfk\_ d1jf0a\_ d1qv0a\_ d1lkja\_ d2mlfc\_ d2m97a\_ d2d8na\_ d4by5a\_  
d1jbaa\_ d4nqga\_ d1wdcb\_ d2mysc\_ d1j7qa\_ d1s6ia\_ d1uhka2 d1r2ua\_  
d1dtla\_ d3kf9a\_ d3pn7c\_ d1qjta\_ d1fi6a\_ d1c07a\_ d5d67d\_ d1tuza\_  
d1eg3a1 d1eg3a2 d2zkmx1 d1snla\_ d1y1xa\_ d1hqva\_ d1dvia\_ d1df0a1  
d1qxp2 d4usla\_ d1k94a\_ d1sfsa\_ d1wkya2 d1uuqa\_ d3wh9a\_ d4mlra\_  
d1xyza\_ d4xuya\_ d2je8a5 d4bf7a1 d3cuia\_ d1ur4a\_ d1qw9a2 d1lodza\_  
d2vzsa5 d1bqca\_ d2x2ya1 d1hjqa\_ d1qnra\_ d4y7ea1 d1vjza\_ d4k68a\_  
d2v3ga\_ d4hpga\_ d1nofa2 d1nq6a\_ d1h4pa\_ d1aq0a\_ d3ziza\_ d4bs0a\_  
d1ecea\_ d1h1na\_ d1ta3b\_ d1w91a2 d1ilwa\_ d1uhva2 d1us3a2 d1legza\_  
d7a3ha\_ d1tvna1 d3nyda1 d1ghsa\_ d2cyga1 d4xv0a\_ d2c8na2 d1w32a\_  
d3emca\_ d1v6ya1 d1foba\_ d2uwfa1 d2fgla\_ d3niya1 d2c0ha1 d1rh9a1  
d1yq2a5 d1szna2 d1fa2a\_ d1pama4 d5do8a1 d1ea9c3 d1hx0a2 d2fhfa5  
d1qhoa4 d1avaa2 d1m53a2 d4m8ua1 d2gjpa2 d1lwha2 d4howa1 d1ktba2  
d1j0ha3 d3vm5a1 d2x1ia\_ d1wzaa2 d1uasa2 d2diea1 d1mxga2 d1ht6a2  
d1eswa\_ d1liv8a2 d5cpsa\_ d1ud2a2 d1zjaa1 d3gbea1 d1kwga2 d1wdpa\_  
d1gcya2 d1g5aa2 d1hvxa2 d3dhpa2 d2bhua3 d4do4a1 d3qgva1 d1e43a2  
d1g94a2 d2d3na2 d1gjwa2 d1gvia3 d1x1na1 d1r7aa2 d1tz7a1 d4c7ga2  
d2gjxa1 d1nowa1 d1yhta1 d4toqa\_ d1wb0a1 d1w9pa1 d1eoka\_ d1itxa1  
d1kfwa1 d1goia2 d1edqa2 d2gsja\_ d1hjxa1 d1vf8a1 d3wdpp1 d3wq5a\_  
d1gnxa\_ d4gxpa\_ d4hz8a\_ d1e4mm\_ d3aiua\_ d1wcga1 d1qvba\_ d3ahxa\_  
d1v02a\_ d2dgaa\_ d1pbga\_ d1vffa1 d1qoxa\_ d4ha4a\_ d2w0pa\_ d2diaa1  
d2e9ia2 d2e9ja1 d2dj4a1 d2eeba1 d2diba1 d2dmba1 d2dmca1 d2d7oa1  
d2ee6a1 d2d7pa1 d2eeaa1 d2di8a1 d1wlha1 d2d7na1 d2nqca\_ d2d7ma1  
d2dica1 d3cnka\_ d2k3ta1 d2eeca1 d1qfha1 d1qfha2 d2bp3a1 d1v05a\_  
d2ee9a1 d2eeda1 d2di9a1 d3syxa1 d2p8va\_ d1xoda1 d1i7aa\_ d1evha\_  
d1qc6a\_ d1legxa\_ d1eh3a\_ d3skpa\_ d1dtza1 d1dtza2 d1jnfa2 d1ce2a1  
d1jnfa1 d1b1xa2 d1b1xa1 d1jw1a1 d1jw1a2 d1ryoa\_ d1h76a1 d1h76a2  
d1iuka\_ d2csua1 d3q9ub\_ d2yv1a1 d3q9na\_ d2d59a\_ d1oi7a1 d2yv2a1  
d1y81a1 d1wgqa1 d1v89a1 d2coda1 d1zc3b\_ d1wg7a1 d1u5ea1 d1v61a1  
d2coca1 d2ys1a1 d1v5pa1 d1ntya2 d1wjma1 d1wila1 d1u29a\_ d1xx0a1  
d1unqa\_ d2zkmx3 d1fhoa\_ d1v88a1 d2adza1 d1x1fa1 d1p6sa\_ d2coaa1  
d1btka\_ d1v5ma1 d1faoa\_ d2x18a\_ d1dyna\_ d1x1ga1 d4kaxb\_ d2j59m1  
d1xcga2 d1txda2 d1u5da1 d1dbha2 d1wlha\_ d1upqa\_ d1v5ua1 d1foea2  
d2fjla1 d1eaza\_ d2dfka2 d2cofa1 d1kz7a2 d1h6ta1 d9ldta1 d2ewda3  
d1up7a1 d2dfda1 d1s6ya1 d1vjta1 d7mdha1 d1hyea1 d1t2da1 d1ojsa3  
d1b8pa1 d1ldna1 d1hyha1 d1civa1 d2a92a1 d1ez4a1 d1i0za1 d1y6ja1

d1gv0a1 d1ur5a1 d1ll1da1 d1obba1 d1npya1 d3t4ea2 d1o0sa1 d2hk9a2  
d2egga2 d1b26a1 d1bvua1 d1gq2a1 d1c1da1 d1leha1 d1gtma1 d1euza1  
d1nvtal d3dona2 d1edza1 d1gpja2 d1vi2a1 d1p77a1 d1nyta1 d1b0aa1  
d1vl6a1 d1v9la1 d1txga2 d3f47a1 d1mv8a2 d2pv7a2 d1xc2a3 d2ahra2  
d4xiya1 d2f1ka2 d1pgja2 d1i36a2 d1np3a2 d1lj8a4 d1teaa3 d1qmg2  
d2i76a2 d2g5ca2 d1wdka3 d1d1ja2 d3cuma3 d1kola2 d1f8fa2 d1qora2  
d1jqba2 d1vj0a2 d1cdoa2 d1gu7a2 d1d1ta2 d1xa0a2 d2dm6a2 d1jvba2  
d1rjwa2 d1lllua2 d1h2ba2 d1tt7a2 d1piwa2 d1o89a2 d1liz0a2 d1e3ja2  
d1yb5a2 d1uufa2 d1e3ia2 d1vc2a1 d2nvwal d1u8fo1 d1ydwal d1hdgo1  
d2g17a1 d1cf2o1 d2czca2 d1r0ka2 d1obfo1 d2cvoa1 d1ebfa1 d1h6da1  
d1i32a1 d1zh8a1 d2q49a1 d1qkia1 d1j5pa4 d3pzra1 d1xeea1 d1vkoa1  
d1vm6a3 d3qvsa1 d2pkqo1 d1b7go1 d1gr0a1 d1p1ja1 d1lc0a1 d1j0xo1  
d3pwka1 d2hjsa1 d1zyao1 d1vkna1 d1tltal d1nvmbl d3sjua\_ d3ojfa1  
d1xu9a1 d2jjya1 d1n7ha\_ d1y1pa1 d1h5qa\_ d1jtva\_ d4fs3a\_ d2bkaa1  
d1gy8a\_ d2c5aa1 d1ulsa\_ d1ooea\_ d2b69a1 d1y5ma1 d1spxa\_ d1aela\_  
d1bxka\_ d1ydea1 d1gega\_ d1hdoa\_ d1o5ia\_ d1e6ua\_ d1snya1 d2rhca\_  
d3zv4a\_ d5ceja\_ d2d1ya1 d1fjha\_ d3w8ea\_ d2fmua1 d1x1ta\_ d1rpnal\_  
d3ay7a1 d1k2wa\_ d1eq2a\_ d2hrbal d3ruaa\_ d2ew8a1 d4hwka\_ d1xgka\_  
d2bd0a1 d1yo6a1 d2a35a1 d2ntva\_ d1vl8a\_ d1hdca\_ d4bkua\_ d2ag5a1  
d2q45a\_ d1nffa\_ d4iy1a\_ d1zbqa1 d1kewa\_ d1ek6a\_ d1ja9a\_ d2q46a2  
d1iy8a\_ d1cyda\_ d2ptga\_ d1hxha\_ d1uzma1 d3lyla\_ d4m89a\_ d3wyea\_  
d2blla1 d1w6ua\_ d1sb8a\_ d2q2va\_ d4nr0a\_ d1e6wa\_ d2gasa\_ d3oigal  
d2bgka1 d1mxha\_ d1vl0a1 d1rkxa\_ d1r6da\_ d1wmaa1 d1e7wa\_ d2c07a1  
d1xkqa\_ d3tzha\_ d1g0oa\_ d3lz6a\_ d1qyca\_ d1ledoa\_ d1gz6a\_ d1loc2a\_  
d1t2aa\_ d1zema1 d2xoxa\_ d1z45a2 d1geea\_ d1p33a\_ d3lt0a\_ d4e6pa\_  
d2wyua\_ d1db3a\_ d4q9na\_ d1xhla\_ d4o1ma\_ d1fmca\_ d2uvda\_ d2gdza1  
d1uaya\_ d2z1ma\_ d2o23a2 d2fr1a2 d2fr1a1 d1qsga\_ d1qyda\_ d4zjua\_  
d2a4ka1 d1yb1a\_ d1wvga1 d1yxma1 d3f4ba\_ d1mg5a\_ d1xg5a1 d1r55a1  
d3gboa\_ d1atla\_ d1kufa\_ d1buda\_ d4q1la\_ d1ypla\_ d1wnia\_ d3ulra1  
d1kapp2 d1k7ia2 d1t3ca\_ d1epwa3 d2a97a\_ d3f1ea\_ d3ioqa\_ d1fh0a\_  
d1o0ea\_ d1khqa\_ d1m6da\_ d2cb5a\_ g8pch.1 d1s4va\_ d2pnas\_ d1vsna1  
d1mira\_ d1iwda\_ d2oula\_ d7pcka\_ d3bwka\_ d3bcna\_ d2p86a\_ d1pvja\_  
d1pcia\_ d1gece\_ d1deua\_ d4bs6a\_ d1xkga1 d1cqda\_ d1jqpa2 d2c0ya\_  
d2bdza\_ d3p5ua\_ d2o36a\_ d1k9xa\_ d1zoya1 d1qo8a2 d1d4ca2 d1chua2  
d1jnra2 d1kf6a2 d2jk6a2 d2jk6a1 d1fecal d1fecal d1lpfa1 d1lpfa2  
d1xhca1 d1xhca2 d1dxla2 d1dxla1 d1gera2 d1m6ia2 d1onfa1 d1onfa2  
d3lada2 d3lada1 d1w4xa1 d1w4xa2 d1mo9a1 d1xdia1 d1fl2a2 d1fl2a1  
d1fcda1 d1fcda2 d1h6va2 d1h6va1 d1mo9a2 d1gv4a2 d1gv4a1 d2gv8a2  
d2gv8a1 d1aoga1 d1aoga2 d1hyua1 d1ebdal d1ebdal d3dk9a1 d1qlra2  
d1qlra1 d1gesa1 d1pv8a\_ d1w5qa\_ d2c1ha\_ d1ohla\_ d1zbfal d2z1ha\_  
d2etja1 d3qioa1 d1j11a\_ d2e4la\_ d1j12a\_ d2l1sna1 d1lio2a\_ d1uaxa\_  
d2yv0x\_ d1mu2a1 d1i39a\_ d1pn0a1 d1reoa1 d1ju2a1 d2f5va1 d3c96a1  
d2gmha1 d1pj5a2 d1gpea1 d1n4wa1 d1k0ia1 d2dw4a2 d2ivdal d1seza1  
d2voua1 d1kdga1 d1s5ja1 d2hbja2 d2igia\_ d1wlja\_ d1qhta1 d4dleal



d2f96a1 d3tr8a1 d3mxma\_ dlq8ia1 dly97a1 dlw0ha\_ dlkfsa1 d2py5a1  
d1noya\_ d1d5aa1 d1yt3a3 d2guia\_ d3mwpal d4kbla\_ d2y8ga\_ dlxkea1  
d2y8fa\_ d1liv0a\_ d1nu0a\_ d1b9ra\_ dloffa\_ d1frra\_ d3wcqa\_ d1e9ma\_  
d1l5pa\_ d1wria\_ d1i7ha\_ d3av8a\_ d1czpa\_ d1rfka\_ d3p1ma1 d3b2ga\_  
d2bt6a2 d1v58a1 d1t3ba1 d4ilfa2 d4npba2 d1tq5a1 d3nvva1 d1krha3  
d2h88b1 d1n62a2 d1t3qa2 d1kf6b2 d1zoyb1 d1jq4a\_ d1ffva2 d1dgja2  
d1rm6c2 d1jmxal d1pbya1 d1pbya2 d1r7ha\_ d1faaa\_ d1wika1 d1xfla\_  
d1ttza1 d2f51a1 d1ti3a\_ d1nhoa\_ d1sena\_ d2i4aa\_ d1ep7a\_ d1zmaa1  
d1fo5a\_ d3lefa1 d3diea1 d2yana1 d1z6na1 d1oaza\_ d3zywa1 d4aj8a\_  
d1nm3a1 d4fiwa\_ d1wmja\_ d4hs1a1 d1iloa\_ d1xwaa1 d1wjka1 d2vm1a\_  
d1fb6a\_ d1gh2a\_ d1h75a\_ d1nw2a\_ d1kx5b\_ d3a6na\_ d4m6ba2 d2nqbd\_  
d3wkjd\_ d2yfwe\_ d4h9na\_ d5bnxa\_ d1kx5c\_ d3r45a\_ d1eqzb\_ d4jjnb\_  
d1f66c\_ d1eqza\_ d4wnnb\_ d1u35c1 d1id3a\_ d2nqbc\_ d1kx5d\_ d1ku5a\_  
d1f1ea\_ d1b67a\_ d1tafa\_ d1bh9b\_ d1tafb\_ d1jfib\_ d1q9ca\_ d1h3ob\_  
d2byka1 d1n1ja\_ d4g92b\_ d1jfia\_ d1h3oa\_ d2bykb1 d1n1jb\_ d1pd212  
d1nhya2 d2a2ra2 d1k0dd2 d1f2ea2 d1gsua2 d1f3ba2 d2fhea2 d2pvqa1  
d1tw9a2 d1oyja2 d1e6ba2 d1k0ma2 d3ik7a1 d4is0a1 d1r5aa2 d1j1va2  
d1m0ua2 d3gtub2 d1z9ha2 d1okta2 d1axda2 d2gsra2 d1tu7a2 d1k3ya2  
d1zgma1 d1gnwa2 d1gwca2 d2gsta2 d1glqa2 d1oe8a2 d1pn9a2 d1v2aa2  
d1fw1a2 d1duga2 d1g7ea\_ d1a0rp\_ d1iqca2 d1iqca1 d1eb7a2 d1eb7a1  
d1nmla1 d4ilya\_ d4olta\_ d1qgia\_ d3wyha\_ d4g9sa1 d3gxra\_ d1qqya\_  
d1f6ra\_ d1livma\_ d2gv0a\_ d1iiza\_ d2z2fa\_ d1j8xa\_ d1ghla\_ d1b9oa\_  
d174la\_ d169la\_ d2o4wa\_ d1p37a\_ d1k28a3 d1xjta1 d1jtma\_ d2f2qa\_  
d4e97a1 d1iyka2 d1rxta1 d1iica2 d1iica1 d2za0a\_ d2c21a1 d1f9za\_  
d2pjsa1 d1klla\_ d2i7ra1 d1ecsa\_ d1xqaa1 d5cj3a1 d1jifa\_ d2p7oa\_  
d1r9ca\_ d1nkia\_ d1mpya2 d1kw3b2 d4ghga1 d1tfza1 d3isqa1 d3isqa2  
d1sqia1 d1sqia2 d1lkda2 d1lkda1 d1mpya1 d1cjxa2 d1cjxa1 d1sp9b2  
d1t47a1 d1t47a2 d1f1ua2 d1sp8a1 d1sp8a2 d1f1ua1 d1s5ja2 d1qhta2  
d4dlea2 d1tgoa2 d3py8a2 dlq8ia2 dlkfsa2 d2py5a2 d1d5aa2 dlqsta\_  
d2beia1 d4m3sa\_ d1u6ma1 d1ygha\_ d1yk3a1 d3dr6a\_ d1xmta\_ d1z4ea1  
d2ge3a1 d1bo4a\_ d2fiaa1 d2jdca1 d1y9wa1 d3to7a\_ d1wwza1 d2f14a1  
d2ozua1 d2b5ga\_ d2cy2a1 d2p0wa\_ d1cm0a\_ d4pswa\_ d1yrea1 d1yr0a1  
d1m4ia\_ d2gana1 d1yvka1 d1ghea\_ d2g3aa1 d1y7ra1 d2eulia1 d2fsra1  
d1xeba\_ d2ae6a1 d1cjwa\_ d1qsma\_ d2aj6a1 d1y9ka1 d1i12a\_ d1vkca\_  
d2atra1 d1n71a\_ d2d4pa1 d2fiwa1 d2fe7a1 d1tiqa1 d2ou2a\_ d1yx0a1  
d2fcka1 d1p0ha\_ d2j8ma\_ d2pq8a\_ d1z4ra1 d1s3za1 d1ufha\_ d1xvqa1  
d1pn0a2 d3hy2a\_ d2cvba1 d1o8xa\_ d1lu4a\_ d1we0a1 d2bmxa1 d2a4va1  
d1psqa\_ d1xiya1 d1q98a\_ d1n8ja\_ d1zofa1 d2ggta\_ d3tjja\_ d4jela1  
d3s9fa\_ d2zcta\_ d1qmva\_ d1jfua\_ d2b1ka\_ d5dvba1 d2b5xa1 d2v2ga\_  
d1st9a\_ d3tb2a\_ d4llra\_ d4fh8a1 d1e2ya\_ d1knga\_ d2h30a\_ d1i5ga\_  
d2z9sa\_ d2f8aa1 d1tp9a1 d2b7ka\_ d1nm3a2 d3hvva\_ d2wfca1 d4kcea\_  
d1xvwa1 d4gqca1 d3qpma\_ d4k1fa\_ d1zzoa1 d1gp1a\_ d1prxa\_ d1f74a\_  
d3l21a\_ d2e1da\_ d1to3a1 d1w3ia\_ d1sfla\_ d1n7ka\_ d1vcva1 d4imea\_  
d1wa3a\_ d2ocza1 d1f2ja\_ d3m16a\_ d2yxga\_ d1ub3a\_ d3a5fa\_ d1fbaa\_

d1l6wa\_ d1xfba1 d1wx0a1 d1vpxa1 d1ojxa\_ d2a4aa1 d1xkya1 d3cq0a1  
d3s1xa\_ d1f05a\_ d1fdja\_ d3cpra1 d4d2ja\_ d1cg2a1 d1yloa2 d1y7ea2  
d1y0ya3 d1lfwa1 d1vixa1 d1fnoa4 d1vhoa2 d1ysja1 d1vhea2 d1z2la1  
d2fvga2 d1vgya1 d2grea2 d1xmba1 g1q7l.1 d1rtqa\_ d1jgta2 d1ofda3  
d1ecfa2 d1q15a2 d1ct9a2 d1ao0a2 d1te5a\_ d1ra6a\_ d1muka\_ d3gsza\_  
d1khva\_ d1te9a\_ d2xwha\_ d3uqsa\_ d3hkwa\_ d3n6ma\_ d2cjqa\_ d2xyma\_  
d1teba\_ d1te8a\_ d1u09a1 d4wfxa\_ d3tyqa\_ d2pgga1 d1gyta2 d1cr6a2  
d3groa\_ d1thta\_ d1ei9a\_ d2ftba\_ d1pmpa\_ d2rcqa1 d1fdqa\_ d4lkpa\_  
d1sa8a\_ d1vyfa\_ d1lpja\_ d3vg7a1 d4azqa1 d1o8va\_ d5bvqa\_ d1p6pa\_  
d2qo4a\_ d1opba\_ d1yiva1 d1o1va\_ d4bvma1 d4tkba\_ d4i3ba\_ d1bwya\_  
d1ftpa\_ d1ggla\_ d4gkca\_ d1cbia\_ d3p6da1 d1kqwa\_ d2a0aa1 d3zxha\_  
d1cgl\_a\_ d1rm8a\_ d1eaka2 d1hy7a\_ d2jsda\_ d1cxva\_ d1hv5a\_ d1i76a\_  
d1u08a\_ d1lc5a\_ d1b5pa\_ d2ay1a\_ d3pd6a\_ d7aata\_ d2csta\_ d1j32a\_  
d1fg7a\_ d4wlha\_ d1o4sa\_ d1v2da\_ d1gdea\_ d1m6sa\_ d1v72a1 d1svva\_  
d1ajsa\_ d1wsta1 d2f8ja2 d1lk9a\_ d1vp4a1 d1xi9a1 d2gb3a1 d1yaaa\_  
d3p0ya1 d1igra1 d1igra2 d1n8yc2 d1n8yc1 d1m6ba2 d4dv8a2 d2bk7a\_  
d3fjua\_ d1z5ra1 d1kwma1 d1uwya2 d1jqga1 d2c1ca1 d1dtda\_ d1h8la2  
d1h6ta2 d1h6ua2 d2tbvc\_ d1c8nc\_ d1x36a\_ d1smvc\_ d1ng0c\_ d4sbvc\_  
d1lopa\_ d1f2nc\_ d1cixa\_ d1y29a\_ d1v7fa\_ d2jtba\_ d1g9pa\_ d1lupa\_  
d1qk7a\_ d1mb6a\_ d2a2va\_ d1niya\_ d1i25a\_ d1hvwa\_ d2mpqa\_ d1ie6a\_  
d1kqha\_ d1la4a\_ d2mxoa1 d1d10a\_ d1koza\_ d1qk6a\_ d1emxa\_ d1lqra\_  
d1c6wa\_ d1rmka\_ d1ixta\_ d1eyoa\_ d1cna\_ d1fu3a\_ d1g1pa\_ d1fyga\_  
d1rypd\_ d1irua\_ d1rypc\_ d3unfk\_ d1rypa\_ d1j2pa\_ d1irui\_ d1j2qh\_  
d3unfh\_ d1m4ya\_ d1rypb\_ d1irul\_ d1irug\_ d1iru2\_ d1q5rh\_ d1rypg\_  
d1g3ka\_ d1iruf\_ d1q5qa\_ d1e94a\_ d1irub\_ d1ryph\_ d3ty6a\_ d1iruj\_  
d1iruk\_ d1rype\_ d1irud\_ d1irue\_ d3mi01\_ d1rypf\_ d1iruh\_ d2z3ba\_  
d1iruc\_ d3mka2\_ g1gk9.1 g1or0.1 g1e3a.1 d1mqta\_ d1d4m3\_ d1fmd3\_  
d2mev1\_ g1aym.1 d1ev13\_ d4q4w1\_ d1r1a3\_ d2x5ia\_ d1rhi1\_ g1r1a.1  
g1d4m.1 g1rhi.1 d1b35b\_ d1lopa\_ d4iv1a\_ g1pvc.1 g1fpn.1 d1fpn1\_  
d4gb31\_ d1d4m1\_ d1fmd1\_ d1ev11\_ d2wzr3\_ g1cov.1 d1qqp3\_ g1fmd.1  
d2x5ic\_ d1rhi3\_ g1oop.1 d1hxs1\_ g1hxs.1 d1fpn3\_ d1bev1\_ g2mev.1  
d1eah3\_ d1aym1\_ d1pvc3\_ d1qqp1\_ d1zba3\_ d1h8ta\_ d3vbhc\_ g1b35.1  
g1bev.1 d1hxs3\_ g1ev1.1 d1bev3\_ g1tmf.1 d1tmf1\_ d1b35a\_ d2mev3\_  
g1eah.1 g1h8t.1 d1eah1\_ d4q4w3\_ d1r1a1\_ d1aym3\_ d1pvc1\_ d1zba1\_  
d1h8tc\_ d1lopc\_ d1tme3\_ g1qqp.1 d4iv1c\_ g1tme.1 d1p8ba\_ d3ia2a\_  
d1a88a\_ d4dgqa1 d1hkha\_ d1zoia\_ d4lt9a1 d3tc7a1 d3hoja\_ d1i4na\_  
d3vnda\_ d3n18a1 d1geqa\_ d3nav1a1 d1v5xa\_ d4a2ra1 d3tc6a1 d1ujpa\_  
d4ijba\_ d1xcfa\_ d1vc4a\_ d1rd5a\_ d1qopa\_ d3b5va\_ d2r80b\_ d1cqxa1  
d1cg5a\_ d1gcvb\_ d3boma\_ d2h8fb\_ d2raoa\_ d3bj1a\_ d4hrrb\_ d2r50a\_  
d3d1kb\_ d2aa1b1 d3zhwa\_ d3hf4b\_ d3gdja\_ d1jebb\_ d3bj1b\_ d1x9fb\_  
d1wmub\_ d1gcva\_ d3bcqb\_ d3d4xb\_ d1gvha1 d2dc3a\_ d3hf4a\_ d4yu3a\_  
d3k8ba\_ d1qpwb\_ d2r80a\_ d3bcqa\_ d1v4wa\_ d3wtgb\_ d1j17a\_ d4esaa\_  
d1a9we\_ d3d1ab\_ d1fsla\_ d4h21a\_ d1v4wb\_ d1mwca\_ d1vhba\_ d1jeba\_  
d1spgb\_ d1h97a\_ d1q1fa\_ d1tu9a1 d3d1aa\_ d1hdsb\_ d3hyub\_ d2zfb\_

d3fs4a\_ d1oj6a\_ d1shrb\_ d4h21b\_ d4yu3b\_ d1spga\_ d3hrwa\_ d3qqra\_  
d3at5a\_ d4wchd\_ d3hyua\_ d1cg5b\_ d1uc3a\_ d1hbra\_ d2raob\_ dloutb\_  
d4esab\_ d3gdjb\_ d3qqqa\_ d1x9fc\_ d3vrfa\_ d1litha\_ d3mkba\_ d3d4xa\_  
d3mjpa\_ d1jl6a\_ d3fh9a\_ dlouta\_ d2dc3b\_ d1lit2a\_ d3eoka\_ d3g46a\_  
d1qpwa\_ d3vrfb\_ d1ch4a\_ d1x9fd\_ d1hdsa\_ d2zfba\_ d3mkbb\_ dlora4a\_  
d3wtga\_ d1a4fa\_ d3fh9b\_ d3bomb\_ d3cy5a\_ d3at5b\_ d1x9fa\_ d2oifa\_  
d4lmbx\_ d1cpcb\_ d3v57a\_ d1kn1a\_ d1cpca\_ d4f0ta\_ d2vjha\_ d4po5b\_  
d1eyxa\_ d1alla\_ d4f0tb\_ d1b33b\_ d1b8db\_ d4h0mb\_ d2vjhb\_ d4lm6b\_  
d2vmlb\_ d1allb\_ d2vjta\_ d3dbja\_ d2vmla\_ d2vjtb\_ d4f0ub\_ d1f99b\_  
d4rmpa1 d1liaa\_ d1eyxb\_ d2uulb\_ d4lmsb\_ d4f0ua\_ d2bv8a\_ d1f99a\_  
d2bv8b\_ d2c71b\_ d3dbjb\_ d4rmpb1 d1b8da\_ d4h0ma\_ d3v57b\_ d1kn1b\_  
d1liab\_ d2uula\_ d2j96a\_ g1wht.1 d2xqfa\_ dlea5a\_ d1f6wa\_ d1dx4a\_  
d1qe3a\_ d1k4ya\_ d4qwwa\_ d2ha2a\_ d2ejca\_ d3muae1 d1lihoa\_ d3q12a1  
d1xm5a\_ d1xaxa\_ d1tvia\_ d4iuua3 d4bvva\_ d5hpga\_ d3k65a\_ d1ki0a3  
d1ki0a2 d1ki0a1 d1pmla\_ d3sp8a3 d2feba1 d1dosa\_ d3qm3a1 d2fjka\_  
d1e88a1 d1l6ja5 d1l6ja4 d1eaka4 d1eaka3 d1l6ja3 d1h8pa1 d3rp2a\_  
g1ucy.1 d1fuja\_ d2zchp\_ d3w94a\_ d1si5h\_ d1lo6a\_ g2pka.1 d1cgha\_  
d1kigh\_ d1a5ia\_ d3s9ba\_ d1hj8a\_ d1ao5a\_ d2anya\_ d1q3xa1 d1gvza\_  
d1azza\_ d4gsoa\_ d2f91a1 d1iaua\_ d1gdna\_ d1eufa\_ g1fiw.1 d1eq9a\_  
d4nfea\_ d2rdla\_ d1spja\_ d1elva1 d1a7sa\_ d1ekbb\_ d1pfxc\_ d1yc0a\_  
d2aiqa\_ g1fiz.1 d1fi8a\_ d4k60a\_ d4dgja\_ d1mzaa\_ d1lop0a\_ d3tjva\_  
d1pytd\_ d1sgfg\_ g1gg6.1 d2eeka\_ g1rtf.1 d1a0ja\_ d3g01a\_ d1pytc\_  
d4e7na\_ d1ddja\_ d1z8ga1 d2hlca\_ d1npga\_ d1brup\_ g1jou.1 d1sgfa\_  
d1autc\_ g2hnt.1 g1kdq.1 dlorfa\_ d3s69a\_ d4crga\_ d1fxya\_ d1lbqya\_  
d1svpa\_ d1mbma\_ d3su6a1 d1cula1 d4agka\_ d1vcpa\_ d1q31a\_ g1n11.1  
d3e90b\_ d1ep5a\_ d3u1jb\_ d1jx4a2 d3gv5b1 d1t94a2 d3bq0a2 d3lgia\_  
d3i77a\_ d2z9ia2 d4nsva\_ d1lcya2 d4jcna\_ d1os8a\_ d1hpga\_ d1p3ca\_  
d1l1ja\_ d1qtfa\_ d1e69a\_ d1mv5a\_ d3g60a4 g1ii8.1 d1ewqa2 d1ji0a\_  
d1qhla\_ d1v43a3 d2wmfa1 d1vpla\_ d1g2912 d4a82a2 g1f2t.1 d2d62a1  
d3tuic1 d2bbsa1 d3g60a3 d2ixea\_ d1g6ha\_ d1sgwa1 d2qi9c\_ d3rlfa1  
d3b60a1 d3d31a2 d2pzea1 g1xew.1 d1jj7a\_ d1oxxk2 d2onka1 d1wlwa\_  
d1iwea\_ d1qf5a\_ d1vmaa2 d1nija1 d2p67a1 d3ihla\_ d1okkd2 d1ls1a2  
d1s1ma2 d1iona\_ d2v40a\_ d1dj3a\_ d3hida\_ d2vola1 d2g0ta1 d1vcoa2  
d1j8mf2 d1g3qa\_ d1xjca\_ d1p9ba\_ d1qzxa3 d1ihua2 d1ihua1 d2qm8a\_  
d1dj2a\_ d4ioja\_ d1cp2a\_ d1yrba2 d1hyqa\_ d3gqba2 d1skye3 d1xp8a1  
d1tf7a2 d1tf7a1 d1ye8a1 d1skyb3 d2qe7d2 d4blta\_ d4huta\_ d3ldaa2  
d4hyya\_ d2i3ba1 d1crla\_ d3j9tb2 d3ntua2 d1vdza1 d2z43a\_ d1e9ra\_  
d1nlfa\_ d3ziaa2 d1g6oa\_ d3ziad2 d3j9ta2 d1pzna2 d3gqbb2 d2i49a\_  
d1nnfa\_ d1xvxa\_ d1ursa\_ d1h3da1 d1iuda\_ d4mlva1 d1twya\_ d3e13x\_  
d2nxoa1 d4pfua\_ d3ttma\_ d1elja\_ d2qmwa1 d1us5a\_ d1y3na1 d1jeta\_  
d1uqwa\_ d4f19a1 d2esna2 d3thia\_ d3fasa1 d2uyeb\_ d2xwva1 d1r91a\_  
d2fyia1 d1pb7a\_ d2ozza1 d1sw5a\_ d1nh8a1 d1vr5a1 d2g29a\_ d1xs5a\_  
d3lswa\_ d2z23a\_ d3w9va\_ d3tcha\_ d1z7me1 d3q27a\_ d1p99a\_ d1ve4a1  
d2i6ea1 d4mcoa1 d4n8ya\_ d1eu8a\_ d1zba1 d1hsla\_ d1ixca2 d1j1na\_

d1xvya\_ d1y9ua\_ d2z22a1 d1xoca1 d4oera\_ d1wdna\_ d5f1qa1 d1xt8a1  
d1i6aa\_ d4gwoa\_ d4igta1 d1pc3a\_ d4mmpa1 d1o63a\_ d2czla1 d2onsa2  
d4mija1 d1m8pa3 d1etha2 d1w52x1 d2ppla1 d1hpla2 d1lppb2 d2oxea1  
d1bu8a2 d1rpla2 d1c4oa1 d2p6ra3 d2p6ra4 d1oywa2 d1oywa3 d1wrba1  
d1w36b2 d1w36b1 d1c4oa2 d3bora\_ d1t6na\_ d2eyqa5 d2eyqa3 d2eyqa2  
d2zu6a2 d1veca\_ d1uaaa1 d1w36d1 d2g9na1 d1z3ix2 d2rb4a\_ d1hv8a1  
d1hv8a2 d1t5ia\_ d1w36c2 d2j0sa2 d2j0sa1 d3hjha1 d1z5za1 d1qdea\_  
d1z63a1 d1s2ma2 d1s2ma1 d1wp9a1 d1wp9a2 d1gm5a3 d1gm5a4 d3dina4  
d3dina3 d1q0ua\_ d1w36c1 d1z3ix1 d1nkta3 d1nkta4 d1uaaa2 d1w36d2  
g1qhh.1 d2fwra2 d2fwra1 d3q3ma\_ d1za0a1 d1mxra\_ d2inca\_ d2incb\_  
d1mhyb\_ d3hf1b\_ d1mtyb\_ d1r2fa\_ d2uw1a\_ d1mhyd\_ d3n37a\_ d1afra\_  
d1oquc\_ d1syya\_ d1mtyd\_ d2o1za\_ d1uzra\_ d1smsa\_ d2fkza\_ d1zujal  
d1s3qa1 d2fjca1 d1z6om1 d1veia\_ d4dyya\_ d1jiga\_ d3gvya\_ d2pyba\_  
d4cy9a1 d3bvfa1 d1r03a\_ d2cf7a\_ d1nf4a\_ d1zs3a1 d4iwka\_ d3ka8a\_  
d3np0x\_ d1n1qa\_ d1l1b3a\_ d4e6ka\_ d1z6oa1 d2fzfa1 d4dyua\_ d3ge4a\_  
d1jgca\_ d4am4a\_ d2z6ma\_ d1ji5a\_ d1vlga\_ d1lkoa1 d1krqa\_ d3qz3a\_  
d1o9ra\_ d2ffxj\_ d1euma\_ d1yv1a1 d2v2pa\_ d1j30a\_ d4di0a\_ d1dpsa\_  
d1oewa\_ d2qzxa\_ d2asia\_ d1psoe\_ d1miqa\_ d1smra\_ d2h6ta\_ d1pfza\_  
d1izda\_ d3hd8a\_ d1j71a\_ d1dpja\_ d4aa9a\_ d1t6ex\_ g1b5f.1 g1lya.1  
g1htr.1 d1qdma2 d1bxoa\_ d1wkra\_ d1tzsa\_ d1libqa\_ d2qzwa\_ d2v76a\_  
d1wj1a1 d1aqca\_ d1qqga2 d1ntva\_ d1n3ha\_ d4dbba\_ d3f0wa1 d1p3ra\_  
d1wgua1 d2cy4a1 d3hqca\_ d1wvha1 d1xr0b1 d1bdqa\_ d3ggta\_ d3ixoa\_  
d1mrxa\_ d2haha\_ d1tw7a\_ d4njsa\_ d1sgua\_ d2p3da\_ d1nsoa\_ d3d3ta\_  
d2rkfa\_ d1c6ya\_ d2rspa\_ d3ogpa\_ d3ekwa\_ d2o4na\_ d2j9ja\_ d3ggua\_  
d3lzua\_ d4npua\_ d4j55a\_ d2r8na\_ d2fxda\_ d2p3ca\_ d4dqa\_ d3ttpa\_  
d3t3ca\_ d2p3aa\_ d2hc0a\_ d2fdda\_ d3mwsa\_ d1k8rb\_ d1wgra1 d1ef5a\_  
d1wfyal d1e8ya3 d1wgya1 d1l1fda\_ d2cs4a1 d1wxma1 d2byeal d3kh0a1  
d2byfal d1wxaa1 d1e7ua3 d3ruib\_ d1eo6a\_ d3waob\_ d2r2qa1 d3m95a\_  
d3wana\_ d2a13a1 d2cr5a1 d1wj4a1 d1s3sg\_ d3ubra\_ d1qo8a1 d1d4ca1  
d2k3va\_ d1ft5a\_ d1qdba\_ d1m1qa\_ d2j7aa\_ d1h21a\_ d1ogyb\_ d4fasa\_  
d1jnia\_ d1oaha\_ d1sp3a\_ d1g66a\_ d5ajha1 d4lu0a\_ d1of8a\_ d3unda1  
d3e9aa1 d1vr6a2 d2qkfa\_ d1d9ea\_ d1o60a\_ d3h33a\_ d1rwja\_ d19hca\_  
d1os6a\_ d3bxua\_ d3h4na\_ d1i77a\_ d1j0pa\_ d2ctha\_ d1duwa\_ d1ofwa\_  
d2e84a\_ d1hh5a\_ d1gyoa\_ d3h34a\_ d1dszb\_ d1a6ya\_ d3cbba\_ d1ynwa1  
d1r4ia\_ d1hcqa\_ d2hana\_ d2hanb\_ d2enva1 d1kb4b\_ d2n11b\_ d1l01a\_  
d1cita\_ d1um8a\_ d1ixza\_ d1qvra2 d1qvra3 d1qzma\_ d1sxjc2 d1jr3d2  
d2p65a\_ d1g8pa\_ d3hu3a3 d1sxjd2 d1njfa\_ d1in4a2 d1sxja2 d1tuea1  
d2ce7a2 d1w5sa2 d1sxjb2 d1d2na\_ d1ny5a2 d1ofha\_ d2gnoa2 d2a5yb3  
d1fnna2 d1u0ja1 d1lv7a\_ d1iqpa2 d2fnaa2 d1ixsb2 d4gita\_ d1sxje2  
d1g41a\_ d1k8ka2 d1k8ka1 d3uleb1 d3i33a2 d3i33a1 d1bupa1 d1dkgd2  
d1dkgd1 d4ci6a2 d1jcfal d4a2ba2 d2fxua1 d1yaga2 d4cbua2 d1bupa2  
d21j7a\_ d1n4na\_ d2m8bb1 d2kyqa\_ d3psma\_ d1jkza\_ d1jxca\_ d2g11a\_  
d1ugla\_ d4uj0a\_ d2k4ua\_ d1hp2a\_ d2lu9a\_ d1baha\_ d2meoa1 d1wm7a\_  
d1hlya\_ d1n8ma\_ d1jlza\_ d1wpda\_ d1c55a\_ d1pvza\_ d1wt7a\_ d1rjia\_

d1wz5a\_ d1m2sa\_ d1pjva\_ d1c49a\_ d1qkya\_ d2ktca1 d1wmta\_ d1du9a\_  
d1j5ja\_ d1rlga\_ d1t0za\_ d2i61a\_ d1t1ta\_ d1kv0a\_ d21kba\_ d1npia\_  
d1wwna\_ d1pe4a\_ d2kbka\_ d2li7a\_ d1djta\_ d2kbha\_ d1dq7a\_ d1sega\_  
d1omya\_ d1zywa1 d1jzaa\_ d1bnla\_ d1dy2a\_ d3ubub\_ d1legia\_ d1qo3c\_  
d1v7pa\_ d1tdqb\_ d3ubua\_ d1c3ab\_ d1h8ua\_ d3bx4b\_ d1t8ca1 d1sb2a1  
d1qdda\_ d2ziba1 d3cada\_ d1byfa\_ d1j34b\_ d1jwia\_ d1jzna\_ d1c3aa\_  
d1wmza\_ d3bdwb\_ d1hq8a\_ d1fifa1 d1dv8a\_ d3hupa\_ d1wk1a1 d1lumra\_  
d2afpa\_ d3bx4a\_ d1gz2a\_ d1sl6a\_ d1v7pb\_ d3g8ka\_ d1ixxa\_ d1j34a\_  
d1jwib\_ d1g1sa1 d1y17a1 d1ja3a\_ d1fvub\_ d3bdwa\_ d1sb2b1 d1fvua\_  
d1umrc\_ d1oz7a\_ d4m17a\_ d3cfwa1 d1ypqa1 d1g1ta1 d3fd4a\_ d3l9jc\_  
d4dn8a1 d1v41b\_ d1rdl1\_ d2msba\_ d1dzka\_ d4tlja\_ d2a2ua\_ d4wfva\_  
d3t1da\_ d4iaxa\_ d3zq3a\_ d2nnda\_ d1i4ua\_ d1bbpa\_ d1kt7a\_ d1lexsa\_  
d3s26a1 d1lf7a\_ d1qfta\_ d4gh7a\_ d1z24a1 d1qabe\_ d1xxia\_ d1lew3a\_  
d3bx7a\_ d4iawa1 d1n0sa\_ d1gkab\_ d3kzaa\_ d2k23a\_ d2l9ca1 d2joza1  
d1gm6a\_ d3kffa\_ d3saoa1 d1e5pa\_ d1yupa1 d1iiua\_ d1cwva5 d1rpma\_  
d2shpa1 d1l8ka\_ d2ooqa1 d1g4us2 d1p15a\_ d1lara2 d1lara1 d1wcha\_  
d2fh7a2 d2fh7a1 d1ohea1 d1ohea2 d2f4da\_ d1rxda\_ d2hxpa\_ d1xria\_  
d1d5ra2 d1fpza\_ d3ezza\_ d4y2ea\_ d3azya\_ d3wvja\_ d1upsa1 d2hyka\_  
d1ajka\_ d2vy0a\_ d1o4ya\_ d3o5sa\_ d3d6ea\_ d3atga\_ d1dypa\_ d1lumza\_  
d3i4ia\_ d1tdha3 d1q3ba3 d1ee8a3 d1k82a3 g1qmo.1 g1len.1 d3zyra\_  
d1fnya\_ d1n47a\_ g2ltn.1 d1avba\_ d3usua\_ d1dhkb\_ d1f9ka\_ d1lukga\_  
d1g8wa\_ d1g9fa\_ d1wbfa\_ d3wcsa\_ d1g7ya\_ d1mvqa\_ d1hq1a\_ d1v6ia\_  
d1dbna\_ d1qnwa\_ d1fx5a\_ d4l8qa\_ d1ioaa\_ d3n35a\_ d2h0ba\_ d2erfa\_  
d1h30a2 d1h30a1 d3mw4a1 d1pz7a\_ d2r1ba\_ d3v64a1 d1d2sa\_ d3bopa1  
d3mw3a1 d1okqa1 d1okqa2 d1wioa4 d1ccza2 d1vcaa1 d1dr9a2 d1ic1a1  
d2d9qb1 d2nxyb2 d1adqa1 d1fnga1 d1uvqb1 d1zs8a1 d2vola1 d2vola2  
d1mfb12 d2jelh2 d1uwel2 d3qq4b1 d1kjbv\_ d1k5na1 d1osph2 d4odh12  
d1ow0a1 d1ow0a2 d1bfob2 d3l9ra2 d3jtth1 d2fath2 d4elkb2 d1fn4b2  
d2xfxb\_ d1pg7x2 d1cqka\_ d4k71b2 d1lk2a1 d1eapb2 d4lfhg2 d1i4fa1  
d2nw2a2 d1kfah2 d1mhca1 d1h3ua1 d1wejh2 d1h0db2 d1a5fh2 d1kcvh2  
d1mjuh2 d1qqda1 d1kcrh2 d1k8ia1 d3huja2 d2nnab1 d1nfd2 d3mffb2  
d1s9va1 d1lk3h2 d1q0x12 d1fv1b1 d1neza1 d4rfeb2 d1r3ha1 d1a6tb2  
d1kja1 d1pz5b2 d1onqa1 d2bc4a2 d1de4a1 d1k8da1 d1tcra2 d1dn0b2  
d1nfd2 d2xwtb2 d1bfoa2 d1mexh2 d1iakb1 d1ypzf2 d4f7ea2 d1q7212  
d2fbjh2 d1fe8h2 d1clzh2 d1fngb1 d1uvqa1 d1vgka1 d1c16a1 d4j12a2  
d4x99b2 d1igtb3 d1je6a1 d1q72h2 d1nldh2 d1teth2 d2hmic2 d1ilca2  
d1ilca1 d1q0yh2 d1kfa12 d3frua1 d1pg7w2 d1u58a1 d1igyb4 d1igyb3  
d1hyrc1 d1klub1 d1deeb2 d1c12b2 d2bc4b2 d2ig2h2 d1kcv12 d3wn5b1  
d1lk2b\_ d1lk312 d1mjul2 d1sm3h2 d1q0xh2 d1zvsa1 d1ydpal d1u8ib2  
d1ypze2 d1kcu2 d1op9a\_ d1y01a1 d1letzb1 d1egj11 d2gsib1 d1nj9a1  
d4jfh1 d1aqk11 d1t2ja\_ d1lo4h1 d1zvya1 d3v4v11 d4enec1 d1kxtb\_  
d5e8ea1 d2pxya\_ d4weud\_ d1xiwc\_ d2esvd1 d1qnzh\_ dlogae1 d1f4xh1  
d4n1hb\_ d3ezjb1 d3mlw11 d1kfah1 d1letza1 d1b4jh1 d3cfic\_ d4w68a\_  
d2arja1 d1ek3a\_ d2ok011 d1vera\_ d1uwgh1 d1blnb1 d1fpth1 d1rzga1

d2giya1 d4m3kb1 d1nc2a1 d2nyyd1 d1ncna\_ d1fbih1 d5dxwa\_ d4fqqa1  
d1dqdh1 d1jfq11 d1kelh1 d1faih1 d1frgl1 d1figl1 d4m6n11 d1fo0a\_  
d4hxb11 d3b5ga\_ d3quyd1 d2h9gb1 d1i8kb\_ d2dd8h1 d2ck0h1 d1eaja\_  
d4w6wb1 d2a6ib3 d1t66d1 d2e27h\_ d1ob1b1 d1f11b1 d2v7na1 d1ad0a1  
d2xt1b1 d1pskh1 d4i13b1 d2op4l1 d1a0q11 d1uwel1 d1za3a1 d1ncb11  
d4uu9a\_ d1bm3h1 d1cloh1 d1nqba2 d1cf8h1 d4y5va\_ d1mhph1 d5anma1  
d4cdgc1 d4ldeb\_ d1y0lb1 d2pcpb1 d1z3gl1 d1dfb11 d1fh5h1 d3g5xa1  
d1tzib1 d4dn3l1 d3zhka1 d2b1hh1 d2uyla1 d1f3dh1 d1nj9b1 d2agjh1  
d2h1pl1 d1q72h1 d8fabb1 d1ndmb1 d1rjca1 d4u6hb1 d3upca\_ d2fbj11  
d1osph1 d1tvda\_ d2cjev\_ d4fhbd1 d1bd2d1 d1rz7h1 d3nn8a\_ d1knoa1  
d1nfdal d2bmkb1 d1dq11\_ d1igyb1 d1igf11 d12e8h1 d3utza1 d1nc2b1  
d1rihh1 d4mwfb1 d4jvpa1 d1mieh1 d1rhfa1 d1fgn11 d1sbsh1 d1lp9e1  
d1dn0a1 d4lqf11 d1iaih1 d1kgcd1 d1mh5b1 d1gpol1 d2g60h3 d1f8t11  
d2jixd1 d4grwh\_ d1fo0b\_ d1bfob1 d1axsa1 d1u9ka\_ d1nmbh\_ d1h8na1  
d1h8na2 d1jguh1 d4eura1 d3sdy11 d35c8h1 d1w72l1 d1mvub\_ d1i9rh1  
d1ob1a1 d4wenb\_ d1yeeh1 d3ietc1 d1f58h1 d1ad0b1 d1mqk1\_ d1nbvh1  
d4b50a\_ d3r8bb\_ d1baf11 d1mamh1 d4rgne1 d2gsgb\_ d35c8l1 d1bafh1  
d1ailh1 d2pcpa1 d2fath1 d2x1pa\_ d1orsb1 d1libgl1 d1shma\_ d1a2yb\_  
d1u0qa\_ d2coqa\_ d1hilb1 d1qfwi\_ d1jv5b\_ d1fn4b1 d5e0qa\_ d1nsnh1  
d1plg11 d4ocx11 d1kb5h1 d1rzfh1 d1pg7x1 d2fx7h1 d2oi9c\_ d1l7i11  
d3eyva1 d1d5i11 d4ffyl\_ d1tet11 d1a6wh\_ d1ac6a\_ d3dvfa\_ d1nfdel  
d1mimh1 d1ri8a1 d1jhlh\_ d3dura\_ d1fskb1 d1f97a1 d3so3b1 d2ak4d1  
d1lp9f1 d4z7wf1 d1l7th1 d4y5ya\_ d4x7ec1 d1emth1 d1ikf11 d1nlbh1  
d4utal1 d1bjma1 d1eapb1 d1u6ah1 d2dtgd1 d1kj2b\_ d1xeda1 d1c1eh1  
d1fgvh\_ d2bnub1 d2fb4h1 d2dtgb1 d1ktrh\_ d1jpth1 d1qkz11 d4hepg\_  
d2atpb1 d1flrh1 d2hrpl1 d1mvfa\_ d1iaim1 d3k80a1 d2jb5h1 d3zkxc\_  
d4grwe\_ d1it9h1 d1rhhb1 d3w9ec\_ d1e4wh1 d1sy6h1 d2j6eh1 d3qxta\_  
d1jglh1 d1p7ka1 d1tzhb1 d4n8pa1 d1gaf11 d2jelh1 d1wioa2 d4i0cc1  
d1cicb1 d1lmka2 d1lmka1 d1iqwh1 d1orqb1 d1ejoh1 d1jnlh1 d4zga1\_  
d43c9b\_ d1ggbl1 d1wejh1 d3q6fa1 d1f3dj1 d3c6la1 d1bqlh1 d3p9wb\_  
d1a3r11 d1h0db1 d2uzil\_ d1eo8l1 d1qfwl\_ d1n7ml1 d1igja1 d1c5ch1  
d2a9mh\_ d1rmfh1 d1fj1b1 d4heme\_ d1ccza1 d1a5fh1 d1logad1 d1dlfh\_  
d1qa9b\_ d1vge11 d3qskb\_ d1sjxa\_ d4ozfg1 d1sq2n\_ d1qd0a\_ d1kevh1  
d1c5db1 d3qcul1 d8faba1 d3bn9d1 d1mjuh1 d4y8dc\_ d7fabh1 d3dvgb1  
d1lo0l1 d1a6tb1 d1gigh1 d1kcrh1 d2hwz11 d1yjdc1 d3clfl1 d4krna\_  
d1dl7l\_ d1e6ol1 d1mexh1 d3r0ma\_ d4kkna\_ d1fns11 d1loaqh\_ d1rzial  
d1lucbh1 d1ncw11 d4b41a\_ d1nfdfl1 d2mpah1 d2d7t11 d4grwf\_ d4b5ea\_  
d1lk3h1 d3u79a\_ d4u3xa\_ d1ghfl1 d1bvkb\_ d1mcww1 d1b88a\_ d1jrhh1  
d32c2b1 d4wemb\_ d1dsfh\_ d1op3h1 d1ce111 d1iqda1 d1qoka1 d1qoka2  
d1qfuh1 d2crya1 d1ay1h1 d1oaql\_ d3ab0b\_ d1rurl1 d1t4kb1 d1bz7b1  
d1n0xh1 d1for11 d1lucb11 d4w6yb\_ d43c9a\_ d2aab11 d1tzia1 d4n1ca\_  
d1k6qh1 d3g9ab\_ d4tvsa1 d1igmh\_ d1pz5b1 d3dx9a1 d3wxwh\_ d1nakh1  
d1kcul1 d3eaka\_ d4qlra1 d1cr9l1 d1d9ka\_ d1f4x11 d1deea1 d2i27n2  
d1c12a1 d2orbl1 d1j8hd1 d1mcph1 d1c5da1 d1kenh1 d1bd2e1 d1h5ba\_

d4x7fc1 d3upaa\_ d1t3fa1 dlindh1 d2dtgc1 d4hc1l11 dlzv5a1 d4wgvb\_  
d1uwgl1 d4f37k1 d1aqkh1 dlvesa\_ d3zkqd\_ dlftl1 d1lo4l1 d1knob1  
d3rrqa\_ d1ct8b1 d4orz\_ d1mlbb1 d4hgkc1 d1dqd11 d1bogb1 d4ozhe1  
d1dr9a1 d1i7za1 d1dn0b1 d1kell1 d1rzib1 d1ypzf1 d1wtla\_ d1hkfa\_  
d1fail1 d1figh1 d2vyre\_ d1sjva\_ d1ohqa\_ d1bfoa1 d1pkqb1 d1mjul1  
d1b4j11 d1nsl1 d2arjb1 d1p4bh\_ d4aj0a\_ d3nn8b\_ d2rcja1 d1f2xk\_  
d4v1dd\_ d1adqh1 d2eksa\_ d4k3ga\_ d1jfqh1 d1uweh1 d1frgh1 d4gftb\_  
d1uz8b1 d4nlea\_ d1bm3l1 d1clo11 d3mcka1 d2vq1a1 d1ae6h1 d4aq1b1  
d1uj3b1 d1nbqa1 d1fh5l1 d2ck0l1 d2ywza\_ d1q72l1 d4nbxb\_ d1hila1  
d4hzb1 d2j88l1 d1zmya1 d1cd0a\_ d1a4ka1 d1psk11 d1a0qh1 d4krmb\_  
d1ncbh1 d2fbjh1 d1j8he1 d1i3ua\_ d1cf8l1 d1fe8h1 d2plya1 d1eeqa\_  
d2x89a\_ d1o10a\_ d2r0lh1 d1ub5a1 d1dfbh1 d3eyvb1 d4jdvb1 d4p2cg\_  
d2gsia1 d2agj11 d1u3ha1 d2h1ph1 d1rih11 d1fskc1 d1boga1 d2a77l1  
d1osp11 d1qfoa\_ d3dwta\_ d2fx7l1 d1rz7l1 d3stba1 d1pkqa1 d1b6da1  
d1dzba2 d1dzba1 d1kj2a\_ d4l1ha\_ d1rzgb1 d1dqlh\_ d12e8l1 d1mie11  
d1jmaa\_ d1sbs11 d1fgnh1 d1f58l1 d1mqkh\_ d1ndgb1 d3qegl1 d1ia11  
d2aw2a1 d1tqbc1 d3fo2a1 d4dkaa\_ d1f8th1 d2g60l1 d2ywy\_ d1uj3a1  
d1yc7a\_ d3bd3a\_ d4w6xb1 d1nmb1\_ d1i8ka\_ d1rjlb1 d1ypze1 d1p7kb1  
d1kxqe\_ d1gpoh1 d2z4qa1 d1w72h1 d1i9r11 d4qgya1 d4xt1c\_ d2qqnh1  
d1cica1 d3c08h1 d2cd0a\_ d2bdnh1 d1hnga1 d1mam11 d1nldh1 d1cr9h1  
d4lcih1 d3bkyh1 d3qg7l1 d1ai111 d1kxvc\_ d4iosd\_ d1l7ih1 d2x1qa\_  
d1ub6b1 d3k74b\_ d1ibgh1 d1teth1 d1igya1 d1hxma1 d2x6ma\_ d2e7la\_  
d5e03a\_ d1qfwm\_ d2r0kh1 d1igjb1 d1rurh1 d1plgh1 d1mj8h1 d1yuhb1  
d3fmg11 d1rzf11 d1emt11 d1ad9b1 d1igtb1 d1nlb11 d1d5ih1 d3k7ua\_  
d4ffyh\_ d1bwva\_ d3dvga1 d1a6ta1 d1fgvl\_ d4qxgl1 d1mim11 d1jh11\_  
d2hffb1 d2hh0l1 d1qkzh1 d1l7t11 d1afvh1 d1iaii1 d2cjuh\_ d1um5h1  
d2ghwb2 d2ghwb1 d1kgce1 d2fgwh1 d1ikfh1 d1dvfd\_ d2i24n1 d2xtjb\_  
d1za3b1 d2yc1a\_ d2hh0h1 d2x1oa\_ d1bvka\_ d1rjla1 d5e7ba1 d1igta1  
d1i11b1 d2fb4l1 d1mvua\_ d1jpt11 d32c2a1 d1fvca\_ d1iqdb1 d2hrph1  
d2p4ab\_ d4qo1a\_ d1p2cb1 d1wt5c\_ d1t4ka1 d5c1mb\_ d1it9l1 d1bz7a1  
d1b2wh1 d1e4wl1 d1jnl11 d1yedb1 d1za6b1 d3u7aa\_ d1igfh1 d3gnml1  
d1orsa1 d1wejl1 d1a2ya\_ d1hxmb1 d1gafh1 d2j4wh1 d1pz5a1 d1j05a\_  
d1a3rh1 d4fq1l1 d1qfwh\_ d1eo8h1 d1n7mh1 d4s11a\_ d1kegh1 d5da4a\_  
d1iqw11 d3whxb1 d1vgeh1 d1deeb1 d1c12b1 d1t2ql1 d1ad9a1 d3gsnb1  
d3b2uc1 d1ggbh1 d1t3fb1 d1nakl1 d4ocmc\_ d1lila1 d2v7hb3 d2esve1  
d1mcoh1 d2qr0b1 d2q3aa\_ d1ct8a1 d1kcr11 d2pxyb\_ d2uzih\_ d5c3ld\_  
d3durb\_ d1c5cl1 d2ak4e1 d1d17h\_ d1xiwd\_ d1mlba1 d1rmfl1 d1i7zb1  
d1dlf1\_ d2xa3a\_ d5bq7b1 d1dqqb1 d3h42l1 d1egjh1 d1kcv11 d1fe8l1  
d2j6e11 d1f3rb2 d1lk3l1 d1sm3h1 d1q0xh1 d1ghfh1 d7fab11 d1igch1  
d1lo0h1 d4idla\_ d5c2b1\_ d1jrh11 d1l11a1 d3zhda1 d4kfcz\_ d1b0wa\_  
d1e6oh1 d1mex11 d4krpb\_ d1fnsh1 d1ncwh1 d4hgma\_ d4eigb1 d4rzca\_  
d2mpa11 d4y5xa\_ d5en2b1 d3lrga1 d4ej1c1 d1rhha1 d1j05b\_ d1forh1  
d1q9wb1 d2wzpd\_ d2aq2a1 d1h0da1 d3revb1 d2ij0c1 d1tzh1 d4m7j11  
d1k6ql1 d3b9kc1 d1igml\_ d3qeua1 d1dsfl\_ d1celh1 d1kcuh1 d1zvha1

d1zvoa1 d1tqbb1 d1ay1l1 d2qscl1 d2cgrh1 d1nl0h1 d1kenl1 d3eo0a1  
d4n9ob1 d1n0xl1 d3k1kc\_ d1c4qa\_ d1prtc1 d2wv6d\_ d1prtf\_ d1ltrd\_  
d4l63b1 d1prtd\_ d1tl0f\_ d2bosa\_ d1prtb1 d3chbd\_ d2aq2b1 d1ck1a1  
d1enf1a1 d1i4pa1 d1v1oa1 d1et9a1 d1esfa1 d2g9hd1 d4ohja1 d1klud1  
d1bxta1 d1eu3a1 d1ty0a1 d1fnua1 d2cqva1 d1fhga\_ d2klma\_ d2dl2a1  
d1biha3 d1biha1 d1biha4 d3qp3a1 d1glca\_ d1gxea\_ d1cvsc2 d1cvsc1  
d1xmwa2 d1m4ka2 d2otpa2 d1biha2 d1rhfa2 d2fcba2 d2fcba1 d1wwbx\_  
d1gsma2 d1epfa1 d1epfa2 d2dava1 d1waaa\_ d1f97a2 d1x44a1 d1vcaa2  
d1fnla2 d1fnla1 d3b5ha2 d3h8na2 d3h8na1 d1jbj1a1 d1jbj2a1 d1pd6a\_  
d1f2qa2 d1f2qa1 d3cx2a\_ d1nbqa2 d3b5ha1 d1n26a1 d1xiwb\_ d1xaua\_  
d1fltx\_ d2ifga1 d1olla1 d1olla2 d1cs6a4 d1cs6a3 d1cs6a2 d1cs6a1  
d2gw5a2 d1sy6a1 d1xiwa\_ d1lucta2 d1lucta1 d1ry7b2 d1gl4b\_ d1qz1a3  
d1olza1 d2c9aa1 d1wwca\_

**Family-33 (b.47.1.1)**

**Positive dataset contains 5 protein sequences.**

d3lgia\_ d3i77a\_ d2z9ia2 d4nsva\_ d4jcna\_

**Negative dataset contains 3928 protein sequences.**

d1m32a\_ d1libja\_ d1c7na\_ d4q75a\_ d2bkwa1 d1t3ia\_ d1n8pa\_ d1qz9a\_  
d1jf9a\_ d1leg5a\_ d1p3wa\_ d3kgwa\_ d1c11a\_ d2ctza1 d1vjoa\_ d2rfva\_  
d1gc0a\_ d1cs1a\_ d1d2fa\_ d2ch1a1 d1qgna\_ d1pffa\_ d1elua\_ d1ax4a\_  
d1c7ga\_ d2v1pa1 d2ez1a\_ d1u08a\_ d1lc5a\_ d1b5pa\_ d2ay1a\_ d1bw0a\_  
d3pd6a\_ d7aata\_ d2csta\_ d1j32a\_ d1fg7a\_ d4wlha\_ d1o4sa\_ d1v2da\_  
d1gdea\_ d1m6sa\_ d1v72a1 d1svva\_ d1ajsa\_ d1wsta1 d2f8ja2 d1lk9a\_  
d1vp4a1 d1xi9a1 d2gb3a1 d1yaaa\_ d1xkla\_ d2wfla\_ d3i2ka1 d1lnsa3  
d1xkta1 d2hfka\_ d5d3ka\_ d2cfba1 d1dfoa\_ d1o69a\_ d1bj4a\_ d3k28a\_  
d2bwpa\_ d3lg0a\_ d2fnua\_ d3ou5a\_ d1z7da1 d1b9ha\_ d1iaya\_ d4msoa\_  
d1bs0a\_ d1s0aa\_ d1sffa\_ d3tqxa\_ d1mdoa\_ d3qboa\_ d3pgya\_ d1bjna\_  
d2dkja\_ d1ejia\_ d1vefa1 d4wxga\_ d3bs8a\_ d3gbxa1 d1w23a\_ d1r0ka3  
d1vkoa2 d1vm6a2 d3qvsa2 d1gr0a2 d1p1ja2 d1ddla\_ d1auyb\_ d1f56a\_  
d1bypa\_ d1azca\_ d1ws8a\_ d3u25a\_ d1cuoa\_ d1id2a\_ d1rkra\_ d2iaac\_  
d4dp1x\_ d1nwpa\_ d2gima\_ d2i7sa\_ d1qhqa\_ d1gyca3 d1hfua2 d1kbva1  
d1kbva2 d1sdda1 d1sdda2 d1gyca2 d1mzya1 d2bw4a1 d1aoza1 d1aoza3  
d1aoza2 d1kyaa2 d1kyaa3 d1kyaa1 d1mzya2 d4e9sa1 d1sddb1 d1sddb2  
d1hfua1 d1hfua3 d1oel1a2 d1oel1a1 d1v10a2 d1v10a3 d1v10a1 g1f8v.1  
d1novc\_ d2bbvc\_ g1or0.1 g1cp9.1 g1e3a.1 d1a3qa1 d1iknc\_ d3brda1  
d1p7hl1 d1oy3c\_ d1imhc1 d1gjia1 d1zk9a1 d2cxka1 d2bema\_ d1pama1  
d1ea9c1 d1qhoa1 d2fhfa2 d2fhfa1 d1k3ia1 d1j0ha1 d1cxla1 d2bhua1  
d1ledqa1 d1f1sa2 d1ut9a2 d1gvia1 d1txka1 d2phla2 d2phla1 d1fxza2  
d1fxza1 d1lrha\_ d1uija1 g1dgw.1 d2v09a\_ d1uika2 d1uika1 d1dgwa\_  
d1lep0a\_ d2pa7a1 d1wlta1 d1nxma\_ d2c0za1 d1ds6b\_ d1fstb\_ d2b5ea2  
d2b5ea3 d2b5ea1 d2b5ea4 d2kp1a1 d2kp2a1 d1hyua3 d1hyua4 d1j08a1  
d1j08a2 d1ydwa2 d2nvwa2 d1zh8a2 d1qkia2 d1xeea2 d1tlta2 d1au7a2  
d1e3oc2 d2ovga\_ d1sq8a\_ d1rzsa\_ d3kz3a\_ d3orca\_ d3gpdg2 d2q49a2  
d1hdgo2 d2g17a2 d2cvoa2 d2czca1 d3pwka2 d1obfo2 d1i32a2 d1zyao2



d2pkqo2 d1b7go2 d2hjsa2 d1cf2o2 d1vkna2 d1nvmb2 d1ux8a\_ d4i0va\_  
d2bkma\_ d1dlwa\_ d2bmma\_ d2msya\_ d2djoa1 d2r5za\_ d1au7a1 d1f43a\_  
d2lmda1 d1akhb\_ d1s7ea1 d3nara\_ d1zq3p1 d2craa1 d1mija\_ d4uuta\_  
d3a01a\_ d1x58a1 d3rkqa1 d3cmya1 d2cqxa1 d2da6a1 d1e3oc1 d1fj1a\_  
d1mh3a1 d1ig7a\_ d1x41a1 d1wh7a1 d1gt0c1 d2mw8a\_ d1x2ma1 d1b72a\_  
d1wi3a1 d1jgga\_ d1wjha1 d1x2na1 d1mnmc\_ d2cuea1 d3k2aa\_ d2hosa\_  
d2jwta2 d1pufa\_ d1oetc1 d2hi3a\_ d1b8ia\_ d4j19a\_ d3lnqa\_ d1wh5a1  
d1b8ib\_ d1fexa\_ d2cqra1 d1guua\_ d1lug2a1 d2cqqa1 d2ajea1 d4a69c\_  
d1h8ac1 d2crga1 d2iw5b1 d1xc5a1 d1ofcx1 d2cu7a1 d1wgxa1 d2cjja1  
d2ckxa1 d1gvda\_ d1hcra\_ d1gdta1 d1u78a2 d2iu5a1 d1zk8a1 d2g7sa1  
d2fd5a1 d2np5a1 d1z0xa1 d2id6a1 d2d6ya1 d2i10a1 d1vi0a1 d2oi8a1  
d3c07a1 d2ns7a1 d2fq4a1 d2yvea1 d1t33a1 d2o7ta1 d1rkta1 d2np3b1  
d2g7ga1 d2gena1 d2fbqa1 d2g71a1 d2gfn1 d2g3ba1 d2jj7a1 d2hyja1  
d1sgma1 d1ui5a1 d2hkua1 d2id3a1 d4jyka1 d1v8fa\_ d2ejca\_ d3muea1  
d1ihoa\_ d3q12a1 d31v8a\_ d1zaka1 d1s4qa\_ d3tvta2 d1uf9a\_ d1khta\_  
d1ckea\_ d1osna\_ d1p5zb\_ d4tmka\_ d3cm0a\_ d1tmka\_ d1jaga\_ d3h86a\_  
d1t0hb\_ d1nn5a\_ d2h92a\_ d3kb2a1 d2c95a1 d1yj5a2 d1kgda\_ d1ly1a\_  
d2ak3a1 d1vyva2 d1deka\_ d2grja1 d1p3ja1 d1y63a\_ d1e4ya1 d1s96a\_  
d3iija1 d1lvga\_ d1nksa\_ d1vyua2 d4e22a\_ d1qf9a\_ d1jjva\_ d1q3ta\_  
d1ki9a\_ d1lw7a2 d1teva\_ d1kjwa2 d1gsia\_ d2iyva2 d1kaga\_ d1e6ca\_  
d1m7ga\_ d1x6va3 d1z0ja1 d3umra2 d3gj0a1 d2gaoa1 d1yzga1 d1x3sa1  
d1g7sa4 d1puja\_ d1udxa2 d1kk1a3 d2o52a\_ d1jwyb\_ d1zca2 d1zcba2  
d2fv8a1 d2cjwa\_ d3dz8a1 d1xzpa2 d1vg8a\_ d4qxaa\_ d2ew1a1 d1x1ra1  
d2bcgy\_ d3doea1 d3cona\_ d3rega\_ d3wyga\_ d1upta\_ d2b6ha1 d1zd9a1  
d1lnza2 d1r5ba3 d1n0ua2 d1r2qa\_ d2f91a1 d2rhda\_ d3q3jb\_ d3q85a\_  
d1efma1 d1r8qa\_ d2gf9a1 d2akab1 d1ek0a\_ d1z08a1 d2gcoa1 d2dy1a2  
d4g01b\_ d2cxxa1 d1svia\_ d3q72a\_ d1ni3a1 d4ac9a4 d2erxa1 d2bmea\_  
d1wxqa1 d2gf0a1 d4ldja1 d1zunb3 d1d5ca\_ d4lv5b\_ d1efca3 d1kmqa\_  
d2g6ba1 d3lrpa\_ d1tada2 d2y8ea\_ d4rd4a1 d1z06a1 d2heia\_ d3a58b\_  
d1u01a2 d1d2ea3 d1zj6a1 d2ocba\_ d3rwoa\_ d1mr3f\_ d2e9sa1 d4u5xa1  
d2iwra\_ d2fn4a1 d3bwdd\_ d2nzja1 d2atva1 d2ksqa\_ d3l43a\_ d1mkya2  
d1mkya1 d1wmsa\_ d1jnja3 d2rmka\_ d1f6ba\_ d1f60a3 d1gota2 d1jala1  
d2fh5b1 d1g16a\_ d2wblc\_ d1m7ba\_ d1wf3a1 d1f5na2 d1t9ha2 d1z6xa1  
d1z0aa1 d2fg5a1 d2a5ja1 d2bcjq2 d1s0ua3 d1ky3a\_ d4y0va\_ d4lhwa\_  
d2qmea1 d2atxa1 d1egaa1 d1ryha\_ d1moza\_ d1nrjb\_ d2erya1 d3bfka\_  
d1puia\_ d1fzqa\_ d3j3az1 d3t5ga\_ d1shza2 d3defa\_ d2f7sa1 d3raba\_  
d3tsoa\_ d3aq4a\_ d2a17a1 d3sfva1 d3bc1a\_ d2ncda\_ d1sdma\_ d3h4sa1  
d2heha\_ d2grya\_ g3kin.1 d1br2a2 d1goja\_ d1f9va\_ d2mysa2 d1lkxa\_  
d3t0qa\_ d4db1a1 d3gbja\_ d1ry6a\_ d1v8ka\_ d1s5ja2 d1qhta2 d4dlea2  
d1tgoa2 d3py8a2 d1q8ia2 d1kfsa2 d2py5a2 d1d5aa2 d1k8ka2 d1k8ka1  
d3uleb1 d3i33a2 d3i33a1 d1bupa1 d1dkgd2 d1dkgd1 d4ci6a2 d1jcf1a1  
d4a2ba2 d2fxua1 d1yaga2 d1yaga1 d4cbua2 d1czan2 d1czan3 d1czan1  
d1ig8a2 d1czan4 d1bg3a4 d1bg3a3 d1bg3a2 d1bg3a1 d3h3no1 d3h3no2  
d3ezwa2 d1hroa\_ d4gedb\_ d3zooa\_ d1mz4a\_ d1gu2a\_ d1f1fa\_ d1dvva\_

d1c6ra\_ d1c75a\_ d1e29a\_ d1gdva\_ d1cnoa\_ d1h32b\_ d1co6a\_ d2bh4x\_  
d2aiua\_ d5cytr\_ d1jdl\_ d1i8oa\_ d2zboa\_ d3dmia\_ d1ls9a\_ d1wvec\_  
d2yk3a\_ d3ph2b\_ d1dw0a\_ d5aura\_ d1ql3a\_ d1qn2a\_ d1f1ca\_ d4zzva\_  
d2xspa\_ d4v20a\_ d1ojja\_ d4ipma1 d1gpia\_ d4csia\_ d3pfza\_ d3ovwa\_  
d2yoka\_ d2nqya\_ d1h4ga\_ d1hixa\_ d1oa2a\_ d1olra\_ d3b7ma\_ d4h7ma1  
d3wp3a\_ d2vgda\_ d1ligoa\_ d3zsea\_ d2nlra\_ d3wx5a\_ d1oa3a\_ d1pvxa\_  
d1m4wa\_ d1f5ja\_ d1oa4a\_ d1ks5a\_ d4ixla1 d2a6za1 d3a4ua\_ d2a6va1  
d1h32a2 d1evsa\_ d1cnt1\_ d1pvhb\_ d1z7ca\_ d1huwa\_ d1bgea\_ d1rhga\_  
d1f6fa\_ d1f45b\_ d1i1rb\_ d1axia\_ d1letea\_ d3tgxb\_ d1scfa\_ d2z3qa1  
d3qb1a\_ d1hula\_ d1m48a\_ d4nkqb\_ d1eera\_ d5e4ea\_ d2o27a\_ d3b5ka\_  
d2psma1 d4zf7a\_ d3uf5a\_ d4x51a\_ d1d9ca\_ d4ypgc1 d3oq3a\_ d1lqsl\_  
d1n1fa\_ d1aula\_ d1wu3i\_ d3bes1\_ d3ux9a\_ d1mixa2 d1e5wa2 d1isna2  
d2a16b2 d4dnxa2 d1v47a2 d1g8fa2 d1jhda2 d1x6va2 d2el7a\_ d1iq0a2  
d1irxa2 d1r6ta2 d1ivsa4 d2cyba\_ d1rqga2 d1j09a2 d2yxna\_ d1f7ua2  
d1ffya3 d2g36a1 d1nzja\_ d1jila\_ d1n31a\_ d1i61a\_ d1pfva2 d1h3na3  
d3n9ia\_ d3sz3a1 d3sw2a\_ d1moxc\_ d1dx5i3 d1edmb\_ d1autl2 d1autl1  
d1nqlb\_ d1dval1 d1szba2 d1kigl\_ d2y5f1\_ d1ijqa2 d1gk5a\_ d1g1sa2  
d1nt0a3 d1xdtr\_ d1lmja2 d1lmja1 d1nzia2 d2wphe\_ d1klil\_ d1pfxl2  
d1pfxl1 d1p9ja\_ d1g1ta2 d1f7ea\_ d4yzub\_ d2mgpa1 d1b9wa1 d2mgpa2  
d1ob1c1 d1ob1c2 d1n1ia2 d1n1ia1 d2npra2 d2npra1 d2y5ia\_ d1qlsa\_  
d1psra\_ d3n22a\_ d2egda\_ d4ggfc\_ d2wcea\_ d2luca\_ d4aqia\_ d3nsia\_  
d2lp3a\_ d1j55a\_ d1a4pa\_ d1k8ua\_ d1nsha\_ d1pvaa\_ d3fs7a\_ d2pvba\_  
d1ttxa\_ d1rwya\_ d2kyfa\_ d1rk9a\_ d1a75a\_ d1exra\_ d1tiza1 d1nyaa\_  
d1g8ia\_ d1ggwa\_ d1wdcc\_ d3fwba\_ d1ggza\_ d2o5ga\_ d1ctaa\_ d1m45a\_  
d3i5gc\_ d1sl8a\_ d1fpwa\_ d2scpa\_ d2roaa\_ d4aqra\_ d3pn7b\_ d1br1b\_  
d2mysb\_ d1s6ca\_ d1bjfa\_ d2obha\_ d1jfk\_ d1jf0a\_ d1qv0a\_ d1lkja\_  
d2mlfc\_ d2m97a\_ d2d8na\_ d4by5a\_ d1jbaa\_ d4nqga\_ d1wdcb\_ d2mysc\_  
d1j7qa\_ d1s6ia\_ d1uhka2 d1r2ua\_ d1dtla\_ d3kf9a\_ d3pn7c\_ d5d67d\_  
d1tuza\_ d1h8ba\_ d1eg3a1 d2zkmx1 d1snla\_ d1gjya\_ d1y1xa\_ d1hqva\_  
d1df0a1 d1qxp2\_ d4usla\_ d1k94a\_ d1wkya2 d1uuqa\_ d3wh9a\_ d4mlra\_  
d1xyza\_ d4xuya\_ d2je8a5 d4bf7a1 d3cuia\_ d1ur4a\_ d1qw9a2 d1lodza\_  
d2vzsa5 d1bqca\_ d2x2ya1 d1hjqa\_ d1qnra\_ d4y7ea1 d1vjza\_ d4k68a\_  
d2v3ga\_ d4hpga\_ d1nofa2 d1nq6a\_ d1h4pa\_ d1aq0a\_ d3ziza\_ d4bs0a\_  
d1ecea\_ d1h1na\_ d1ta3b\_ d1w91a2 d1ilwa\_ d1uhva2 d1us3a2 d1legza\_  
d7a3ha\_ d1tvna1 d3nyda1 d1ghsa\_ d2cyga1 d4xv0a\_ d2c8na2 d1w32a\_  
d3emca\_ d1v6ya1 d1foba\_ d2uwfa1 d2fgla\_ d3niya1 d2c0ha1 d1rh9a1  
d1yq2a5 d1szna2 d1fa2a\_ d1pama4 d5do8a1 d1ea9c3 d1hx0a2 d2fhfa5  
d1qhoa4 d1avaa2 d1m53a2 d4m8ua1 d2gjpa2 d1lwha2 d4howa1 d1ktba2  
d1j0ha3 d3vm5a1 d2x1ia\_ d1wzaa2 d1uasa2 d2diea1 d1mxga2 d1ht6a2  
d1eswa\_ d1iv8a2 d5cpsa\_ d1ud2a2 d1zjaa1 d3gbea1 d1kwga2 d1wdpa\_  
d1gcya2 d1g5aa2 d1hvxa2 d3dhpa2 d2bhua3 d4do4a1 d3qgva1 d1e43a2  
d1g94a2 d2d3na2 d1gjwa2 d1gvia3 d1x1na1 d1r7aa2 d1tz7a1 d4toqa\_  
d1wb0a1 d1w9pa1 d1eoka\_ d1litxa1 d1kfw1 d1goia2 d1ledqa2 d2gsja\_  
d1hjxa1 d1jnda1 d1vf8a1 d3wdpp1 d3wq5a\_ d1gnxa\_ d4gxpa\_ d4hz8a\_

d1e4mm\_ d3aiua\_ d1wcga1 d3ahxa\_ d1v02a\_ d2dgaa\_ d1pbga\_ d1vffa1  
d1qoxa\_ d4ha4a\_ d2w0pa\_ d2diaa1 d2e9ia2 d2e9ja1 d2dj4a1 d2eeba1  
d2diba1 d2dmba1 d2dmca1 d2d7oa1 d2ee6a1 d2d7pa1 d2eeaa1 d2di8a1  
d1wlha1 d2d7na1 d2nqca\_ d2d7ma1 d2dica1 d3cnka\_ d2k3ta1 d2eeca1  
d1qfha1 d2bp3a1 d1v05a\_ d2ee9a1 d2eeda1 d2di9a1 d3syxa1 d1mkea1  
d2p8va\_ d1xoda1 d1i7aa\_ d1qc6a\_ d1legxa\_ d2hmta\_ d1lssa\_ d1b9ra\_  
d1offa\_ d1frra\_ d3wcqa\_ d1e9ma\_ d1l5pa\_ d1wria\_ d1i7ha\_ d3av8a\_  
d1czpa\_ d1rfka\_ d3p1ma1 d3b2ga\_ d2bt6a2 d1wgqa1 d1v89a1 d2coda1  
d1zc3b\_ d1wg7a1 d1u5ea1 d1v61a1 d2coca1 d2ys1a1 d1v5pa1 d1ntya2  
d1wjma1 d1wila1 d1u29a\_ d1xx0a1 d1unqa\_ d2zkmx3 d1fhoa\_ d1v88a1  
d2adza1 d1x1fa1 d1p6sa\_ d2coaa1 d1btka\_ d1v5ma1 d1faoa\_ d2x18a\_  
d1dyna\_ d1x1ga1 d4kaxb\_ d2j59m1 d1kilb2 d1xcga2 d1txda2 d1u5da1  
d1dbha2 d1wlha\_ d1upqa\_ d1v5ua1 d1foea2 d2fjla1 d1eaza\_ d2dfka2  
d2cofa1 d1kz7a2 d9ldta1 d2ewda3 d1up7a1 d2dfda1 d1s6ya1 d1vjta1  
d7mdha1 d1hyea1 d1t2da1 d1oj3a3 d1b8pa1 d1ldna1 d1hyha1 d1civa1  
d2a92a1 d1ez4a1 d1i0za1 d1y6ja1 d1gv0a1 d1ur5a1 d1llda1 d1obba1  
d1v8ba1 d1gdha1 d1l7da1 d2dlda1 d1mx3a1 d1ygya1 d1qp8a1 d1li4a1  
d2naca1 d1npya1 d3t4ea2 d1a4ia1 d1o0sa1 d2hk9a2 d2egga2 d1b26a1  
d1bvua1 d1gq2a1 d1c1da1 d1leha1 d1gtma1 d1euza1 d1nvta1 d3dona2  
d1edza1 d1gpja2 d1vi2a1 d1p77a1 d1nyta1 d1vl6a1 d1v9la1 d1txga2  
d3f47a1 d2pv7a2 d1xc2a3 d2ahra2 d4xiya1 d2f1ka2 d1pgja2 d1i36a2  
d1np3a2 d1lj8a4 d1teaa3 d1qmga2 d2i76a2 d2g5ca2 d1wdka3 d1dlja2  
d3cuma3 d1kola2 d1f8fa2 d1qora2 d1jqba2 d1vj0a2 d1cdoa2 d1gu7a2  
d1d1ta2 d1xa0a2 d2dm6a2 d1jvba2 d1rjwa2 d1llua2 d1tt7a2 d1piwa2  
d1o89a2 d1iz0a2 d1e3ja2 d1yb5a2 d1uufa2 d1vj1a2 d1e3ia2 d3gpdg1  
d1vc2a1 d2nvwa1 d1u8fo1 d1ydwa1 d1hdgo1 d2g17a1 d1cf2o1 d2czca2  
d1r0ka2 d1obfo1 d2cvoa1 d1ebfa1 d1h6da1 d1i32a1 d1zh8a1 d2q49a1  
d1qkia1 d3pzra1 d1xeea1 d1vkoa1 d1vm6a3 d3qvsa1 d2pkqo1 d1b7go1  
d1gr0a1 d1p1ja1 d1lc0a1 d1j0xo1 d3pwka1 d2hjsa1 d1zyao1 d1vkna1  
d1tltal d1nvmb1 d3sjua\_ d3ojfa1 d1xu9a1 d2jjya1 d1n7ha\_ d1y1pa1  
d1h5qa\_ d1jtv\_a\_ d4fs3a\_ d2bkaa1 d1gy8a\_ d2c5aa1 d1ulsa\_ d1ooea\_  
d2b69a1 d1y5ma1 d1spxa\_ d1aela\_ d1bxka\_ d1ydea1 d1gega\_ d1hdoa\_  
d1o5ia\_ d1e6ua\_ d1snya1 d2rhca\_ d3zv4a\_ d5ceja\_ d2d1ya1 d1fjha\_  
d3w8ea\_ d2fmua1 d1x1ta\_ d1rpna\_ d3ay7a1 d1k2wa\_ d1eq2a\_ d2hrba1  
d3ruaa\_ d2ew8a1 d4hwka\_ d1xgka\_ d2bd0a1 d1yo6a1 d2a35a1 d2ntva\_  
d1vl8a\_ d1hdca\_ d4bkua\_ d2ag5a1 d2q45a\_ d1nffa\_ d4iy1a\_ d1zbqa1  
d1kewa\_ d1ek6a\_ d1ja9a\_ d2q46a2 d1iy8a\_ d1cyda\_ d2ptga\_ d1hxha\_  
d1uzma1 d3lyla\_ d4m89a\_ d3wyea\_ d2b1la1 d1w6ua\_ d1sb8a\_ d2q2va\_  
d4nr0a\_ d1e6wa\_ d2gasa\_ d3oiga1 d2bgka1 d1mxha\_ d1vl0a1 d1rkxa\_  
d1r6da\_ d1wmaa1 d1e7wa\_ d2c07a1 d1xkqa\_ d3tzha\_ d1g0oa\_ d3lz6a\_  
d1qyca\_ d1ledoa\_ d1gz6a\_ d1loc2a\_ d1t2aa\_ d1zema1 d2xoxa\_ d1z45a2  
d1geea\_ d1p33a\_ d3lt0a\_ d4e6pa\_ d2wyua\_ d1db3a\_ d4q9na\_ d1xhla\_  
d4o1ma\_ d1fmca\_ d2uvda\_ d2gdza1 d1uaya\_ d2z1ma\_ d2o23a2 d2fr1a2  
d2fr1a1 d1qsga\_ d1qyda\_ d4zjua\_ d2a4ka1 d1yb1a\_ d1wvga1 d1yxma1

d3f4ba\_ d1mg5a\_ d1xg5a1 d3nqyb\_ d4gera\_ d1bqba\_ d1t3ca\_ d2a97a\_  
d3fiea\_ gle1h.1 d3ioqa\_ d1fh0a\_ d1o0ea\_ d1khqa\_ d1m6da\_ d2cb5a\_  
d1cs8a\_ g8pch.1 d1s4va\_ d2pnsa\_ d1vsna1 d1mira\_ d1iwda\_ d2oula\_  
d7pcka\_ d3bwka\_ d3bcna\_ d2p86a\_ d1pvja\_ d1pcia\_ d1gece\_ d1deua\_  
d4bs6a\_ d1xkga1 d1cqda\_ d1jqpa2 d2c0ya\_ d2bdza\_ d3p5ua\_ d2o36a\_  
d1k9xa\_ d1ex4a2 d1c6va\_ d2jk6a2 d2jk6a1 d1feca1 d1feca2 d1lpfa1  
d1lpfa2 d1xhca1 d1xhca2 d1dx1a2 d1dx1a1 d1gera2 d1m6ia2 d1onfa1  
d1onfa2 d3lada2 d3lada1 d1w4xa1 d1w4xa2 d1gesa2 d1mo9a1 d1xdia1  
d1f12a2 d1f12a1 d1fcda1 d1fcda2 d1h6va2 d1h6va1 d1mo9a2 d1gv4a2  
d1gv4a1 d2gv8a2 d2gv8a1 d1aoga2 d1hyua1 d1ebda1 d1ebda2 d3dk9a1  
d1q1ra2 d1q1ra1 d1gesa1 d1zbf1a1 d2z1ha\_ d2etja1 d3qioa1 d1j11a\_  
d2e41a\_ d1j12a\_ d21sna1 d1io2a\_ d1uaxa\_ d2yv0x\_ d1mu2a1 d1lekea\_  
d1i39a\_ d1s5ja1 d2hbja2 d2igia\_ d1wlja\_ d1qhta1 d4dlea1 d1tgoal  
d2f96a1 d3tr8a1 d3mxma\_ d1q8ia1 d1y97a1 d1w0ha\_ d1kfsa1 d2py5a1  
d1noya\_ d1d5aa1 d1yt3a3 d2guia\_ d3mwpa1 d4kb1a\_ d4qmea2 d2xdt2a2  
d1z5ha2 d3nvva1 d1krha3 d2h88b1 d1n62a2 d1t3qa2 d1kf6b2 d1zoyb1  
d1jq4a\_ d1ffva2 d1rm6c2 d1jmx2a2 d1pbya1 d1pbya2 d1r7ha\_ d1faaa\_  
d1wika1 d1xfla\_ d1ttza1 d2f51a1 d1ti3a\_ d1nhoa\_ d1sena\_ d2i4aa\_  
d1ep7a\_ d1zmaa1 d1fo5a\_ d3lefa1 d3diea1 d2yana1 d1z6na1 d1oaza\_  
d3zywa1 d4aj8a\_ d1nm3a1 d4fiwa\_ d1wmja\_ d4hs1a1 d1liloa\_ d1xwaa1  
d1wjka1 d2vm1a\_ d1fb6a\_ d1gh2a\_ d1h75a\_ d1nw2a\_ d1kx5b\_ d3a6na\_  
d4m6ba2 d2nqbd\_ d3wkjd\_ d2yfwe\_ d4h9na\_ d5bnxa\_ d1kx5c\_ d3r45a\_  
d1eqzb\_ d4jjnb\_ d1f66c\_ d1eqza\_ d4wnnb\_ d1kx5a\_ d1u35c1 d1id3a\_  
d2nqbc\_ d1kx5d\_ d1ku5a\_ d1b67a\_ d1tafa\_ d1bh9b\_ d1tafb\_ d1q9ca\_  
d1h3ob\_ d2byka1 d1n1ja\_ d4g92b\_ d1bh9a\_ d1jfia\_ d1h3oa\_ d2bykb1  
d1n1jb\_ d1pd212 d1nhya2 d2a2ra2 d1k0dd2 d1f2ea2 d1gsua2 d1f3ba2  
d2fhea2 d2pvqa1 d1tw9a2 d1oyja2 d1e6ba2 d1k0ma2 d3ik7a1 d4is0a1  
d1r5aa2 d1j1va2 d1m0ua2 d3gtub2 d1z9ha2 d1okta2 d1axda2 d2gsra2  
d1tu7a2 d1k3ya2 d1zgma1 d1b48a2 d1gnwa2 d1gwca2 d2gsta2 d1glqa2  
d1oe8a2 d1pn9a2 d1v2aa2 d1fw1a2 d1duga2 d1nira1 d4ilya\_ d1chka\_  
d4olta\_ d1qqya\_ d1gd6a\_ d1f6ra\_ d1livma\_ d2gv0a\_ d1iiza\_ d2z2fa\_  
d1j8xa\_ d1gh1a\_ d1741a\_ d1691a\_ d2o4wa\_ d1p37a\_ d1k28a3 d1xjta1  
d2f2qa\_ d4e97a1 d1g4ma1 d1g4ma2 d1iyka2 d1iyka1 d1rxta1 d1iica2  
d2za0a\_ d2c21a1 d1mpya2 d1kw3b2 d1kw3b1 d4ghga1 d1tfza1 d3isqa1  
d3isqa2 d1sqia1 d1sqia2 d1lkda2 d1lkda1 d1mpya1 d1cjxa2 d1cjxa1  
d1sp9b2 d1t47a1 d1t47a2 d1f1ua2 d1sp8a1 d1sp8a2 d1etob\_ d1umqa\_  
d1w5qa\_ d2c1ha\_ d1ohla\_ d1l6sa\_ d1qsta\_ d2beia1 d4m3sa\_ d1u6ma1  
d1ygha\_ d1yk3a1 d3dr6a\_ d1xmta\_ d1z4ea1 d2ge3a1 d1bo4a\_ d2fiaa1  
d2jdca1 d1y9wa1 d3to7a\_ d1wwza1 d2f14a1 d2ozua1 d2b5ga\_ d2cy2a1  
d2p0wa\_ d1cm0a\_ d4pswa\_ d1yrea1 d1yr0a1 d1m4ia\_ d2gana1 d1yvka1  
d1ghea\_ d2g3aa1 d1y7ra1 d2euia1 d1q2ya\_ d2fsra1 d1xeba\_ d2ae6a1  
d1cjwa\_ d1qsma\_ d2aj6a1 d1y9ka1 d1i12a\_ d1vkca\_ d2atra1 d1n71a\_  
d2d4pa1 d2fiwa1 d2fe7a1 d1tiqa1 d2ou2a\_ d1yx0a1 d2fcka1 d1p0ha\_  
d2j8ma\_ d2pq8a\_ d1z4ra1 d1s3za1 d1ufha\_ d1xvqa1 d1pn0a2 d3hy2a\_

d2cvba1 d1o8xa\_ d1we0a1 d2bmxa1 d2a4va1 d1psqa\_ d1xiya1 d1q98a\_  
d1n8ja\_ d1zofa1 d2ggta\_ d3tjja\_ d4jela1 d1o73a\_ d3s9fa\_ d2zcta\_  
d1qmva\_ d1jfua\_ d2b1ka\_ d5dvba1 d2b5xa1 d2v2ga\_ d1st9a\_ d3tb2a\_  
d41lra\_ d4fh8a1 d1e2ya\_ d1knga\_ d2h30a\_ d1i5ga\_ d2z9sa\_ d2f8aa1  
d1tp9a1 d2b7ka\_ d1nm3a2 d3hvva\_ d2wfca1 d4kcea\_ d1xvwa1 d4gqca1  
d3qpma\_ d4k1fa\_ d1zzoa1 d1gp1a\_ d1prxa\_ d1yloa2 d1y7ea2 d1y0ya3  
d1lfwa1 d1vixa1 d1fnoa4 d1vhoa2 d1ysja1 d1vhea2 d1z2la1 d2fvga2  
d1vgya1 d1r3na1 d2grea2 d1xmba1 g1q7l.1 d1rtqa\_ d1etha2 d1w52x1  
d2ppla1 d1hpla2 d1lpbb2 d2oxea1 d1rpla2 d1ra6a\_ d1muka\_ d3gsza\_  
d1khva\_ d1te9a\_ d2xwha\_ d3uqsa\_ d3hkwa\_ d3n6ma\_ d2cjqa\_ d2xyma\_  
d1teba\_ d1te8a\_ d1s48a\_ d1u09a1 d4wfxa\_ d3tyqa\_ d2pgga1 d1lgya\_  
d4l3wa\_ d1llfa\_ d1gz7a\_ d1lukca\_ d1cr6a2 d1c4xa\_ d1jlia\_ d2rhwa\_  
d3ia2a\_ d1a88a\_ d4dgqa1 d1zoia\_ d3zxha\_ d1cgl\_a\_ d1rm8a\_ d1leaka2  
d1hy7a\_ d2jsda\_ d1cxva\_ d1hv5a\_ d1leb6a\_ d3p0ya1 d1lgra1 d1lgra2  
d1n8yc2 d1n8yc1 d1m6ba2 d1m6ba1 d1xm5a\_ d1xaxa\_ d1tvia\_ d2tbvc\_  
d1c8nc\_ d1x36a\_ d1smvc\_ d1ng0c\_ d4sbvc\_ d1lopa\_ d1f2nc\_ d1cixa\_  
d1y29a\_ d1v7fa\_ d2jtba\_ d1d1ha\_ d1g9pa\_ d1lupa\_ d1qk7a\_ d1mb6a\_  
d2a2va\_ d1niya\_ d1i25a\_ d1hvwa\_ d2mpqa\_ d1ie6a\_ d1kqha\_ d1la4a\_  
d2mxoa1 d1koza\_ d1qk6a\_ d1emxa\_ d1lqra\_ d1c6wa\_ d1rypd\_ d1lirua\_  
d1rypc\_ d3unfk\_ d1rypa\_ d1j2pa\_ d1lru\_i\_ d1j2qh\_ d3unfh\_ d1m4ya\_  
d1rypb\_ d1lirul\_ d1lirug\_ d1liru2\_ d1q5rh\_ d1rypg\_ d1g3ka\_ d1liruf\_  
d1q5qa\_ d1e94a\_ d1lirub\_ d1ryph\_ d3ty6a\_ d1liruj\_ d1liruk\_ d1rype\_  
d1lirud\_ d1lirue\_ d3mi01\_ d1rypf\_ d1liruh\_ d2z3ba\_ d1liruc\_ d3mka2\_  
d1liru1\_ d1ny721 d1ny722 d1a6ca3 d1a6ca2 d1a6ca1 d1pgl22 d1pgl21  
d1pgl11 d1mqta\_ d1d4m3\_ d1fmd3\_ d2mev1\_ g1aym.1 d1ev13\_ d4q4w1\_  
d1r1a3\_ d2x5ia\_ d1rhi1\_ g1r1a.1 g1d4m.1 g1rhi.1 d1b35b\_ d1loopa\_  
d4iv1a\_ g1pvc.1 g1fpn.1 d1fpn1\_ d4gb31\_ d1d4m1\_ d1fmd1\_ d1ev11\_  
d2wzr3\_ g1cov.1 d1qqp3\_ g1fmd.1 d2x5ic\_ d1rhi3\_ g1oop.1 d1hxs1\_  
g1hxs.1 d1fpn3\_ d1bev1\_ g2mev.1 d1eah3\_ d1aym1\_ d1pvc3\_ d1qqp1\_  
d1zba3\_ d1h8ta\_ d3vbhc\_ g1b35.1 g1bev.1 d1hxs3\_ g1ev1.1 d1bev3\_  
g1tmf.1 d1tmf1\_ d1b35a\_ d2mev3\_ g1eah.1 g1h8t.1 d1eah1\_ d4q4w3\_  
d1r1a1\_ d1aym3\_ d1pvc1\_ d1zba1\_ d1h8tc\_ d1loopc\_ d1tme3\_ g1qqp.1  
d4iv1c\_ g1tme.1 d1y14b1 d2nn6i1 d1i941\_ d2zjra2 d1smxa\_ d2qamc2  
d1hh2p1 d2r7da1 d1r12a2 d1wfaq1 d3bzka4 d1x6oa2 d3a0ja\_ d2j01d2  
d2ja9a1 d4q15a\_ d1hr0w\_ d1luza\_ d2n3sa\_ d2vnud1 d1h95a\_ d1go3e1  
d2nn6h1 d1ne3a\_ d2mola\_ d1liz6a2 d1jjga\_ d1e3pa2 d2ix0a3 d2ix0a2  
d2lxja\_ d1ueba3 d1ueba2 d2z0sa1 d1u0la1 d2ix0a1 d2eifa2 d2je6i1  
d3i2za1 d2c35b1 d2ahob2 d1t9ha1 d3i4oa\_ d2qall1 d1jt8a\_ d2nn6g1  
d1g6pa\_ d3cama\_ d1i94q\_ d1c9oa\_ d1d7qa\_ d2ba0a1 d2vnud2 d2vnud3  
d1khia2 d2qalq1 d1wi5a1 d1xtda2 d1ny4a\_ d4w9ta\_ d1jvna1 d4x2ra1  
d1ka9f\_ d1qo2a\_ d4axka1 d1thfd\_ d4u28a\_ d2y88a\_ d4wd0a\_ d1vzwa1  
d4lt9a1 d3tc7a1 d3hoja\_ d1i4na\_ d3vnda\_ d3n18a1 d3nava1 d1v5xa\_  
d4a2ra1 d3tc6a1 d1ujpa\_ d4ijba\_ d1xcfa\_ d1vc4a\_ d1rd5a\_ d1qopa\_  
d3b5va\_ d2r80b\_ d1cqxa1 d1cg5a\_ d1gcvb\_ d3boma\_ d2h8fb\_ d2raoa\_

d3bj1a\_ d4hrrb\_ d2r50a\_ d3d1kb\_ d2aa1b1 d3zhwa\_ d3hf4b\_ d3gdja\_  
d1jebb\_ d3bj1b\_ d1x9fb\_ d1wmub\_ d1gcva\_ d3bcqb\_ d3d4xb\_ d1gvha1  
d2dc3a\_ d3hf4a\_ d4yu3a\_ d3k8ba\_ d1qpwb\_ d2r80a\_ d3bcqa\_ d1v4wa\_  
d3wtgb\_ d1jl7a\_ d4esaa\_ d1a9we\_ d3d1ab\_ d1fsla\_ d4h21a\_ d1v4wb\_  
d1mwca\_ d1vhba\_ d1jeba\_ d1spgb\_ d1h97a\_ d1q1fa\_ d1tu9a1 d3d1aa\_  
d1hdsb\_ d3hyub\_ d2zfbb\_ d3fs4a\_ d1oj6a\_ d1shrb\_ d4h21b\_ d4yu3b\_  
d1spga\_ d3hrwa\_ d3qqra\_ d3at5a\_ d4wchd\_ d3hyua\_ d1cg5b\_ d1uc3a\_  
d1hbra\_ d2raob\_ d4esab\_ d3gdjb\_ d3qqqa\_ d1x9fc\_ d3vrfa\_ d1litha\_  
d3mkba\_ d3d4xa\_ d3mjpa\_ d1jl6a\_ d3fh9a\_ d1outa\_ d2dc3b\_ d1it2a\_  
d3eoka\_ d3g46a\_ d1qpwa\_ d3vrfb\_ d1ch4a\_ d1x9fd\_ d1hdsa\_ d2zfba\_  
d3mkbb\_ d1or4a\_ d3wtga\_ d1a4fa\_ d3fh9b\_ d3bomb\_ d3cy5a\_ d3at5b\_  
d1x9fa\_ d2oifa\_ d4lmbx\_ d1cpcb\_ d3v57a\_ d1kn1a\_ d1cpca\_ d4f0ta\_  
d2vjha\_ d4po5b\_ d1eyxa\_ d1alla\_ d4f0tb\_ d1b33b\_ d1b8db\_ d4h0mb\_  
d1b33a\_ d2vjhb\_ d4l6m6\_ d2vmlb\_ d1allb\_ d2vjta\_ d3dbja\_ d2vmla\_  
d2vjtb\_ d4f0ub\_ d1f99b\_ d4rmpa1 d1liaa\_ d1eyxb\_ d2uulb\_ d4lmsb\_  
d4f0ua\_ d2bv8a\_ d1f99a\_ d2bv8b\_ d2c71b\_ d3dbjb\_ d4rmpb1 d1b8da\_  
d4h0ma\_ d3v57b\_ d1kn1b\_ d2uula\_ d2j96a\_ g1gxs.1 g1wht.1 dlazwa\_  
d1hlga\_ d2xqfa\_ d1ea5a\_ d1f6wa\_ d1dx4a\_ d1qe3a\_ d1k4ya\_ d4qwwa\_  
d2ha2a\_ d1sfra\_ d1f0na\_ d4qeka\_ d3c8da2 d2pbla1 d1jkma\_ d1jjia\_  
d1lzl1a\_ d1jjfa\_ d2qvba\_ d2v9za\_ d4kafa1 d4iuua3 d4bvva\_ d5hpga\_  
d3k65a\_ d1ki0a3 d1ki0a2 d1ki0a1 d1a0ha1 d1pmla\_ d3sp8a3 d2feba1  
d1dosa\_ d1gvfa\_ d3qm3a1 d2fjka\_ d1f74a\_ d3l21a\_ d2e1da\_ d1to3a1  
d1w3ia\_ d1sfla\_ d1n7ka\_ d1vcva1 d4imeaa\_ d1wa3a\_ d2ocza1 d1f2ja\_  
d3m16a\_ d2yxga\_ d1ub3a\_ d3a5fa\_ d1fbaa\_ d1l6wa\_ d1xfba1 d1wx0a1  
d1vpxa1 d1ojxa\_ d1mxsa\_ d2a4aa1 d1xkya1 d3cq0a1 d3s1xa\_ d1f05a\_  
d1fdja\_ d3cpra1 d4d2ja\_ d1e88a1 d1l6ja5 d1l6ja4 d1leaka3 d1l6ja3  
d1h8pa2 d1h8pa1 d2ftba\_ d1pmpa\_ d2rcqa1 d1fdqa\_ d4lkpa\_ d1sa8a\_  
d1vyfa\_ d1lpja\_ d3vg7a1 d4azqa1 d5bvqa\_ d1p6pa\_ d2qo4a\_ d1opba\_  
d1yiva1 d1olva\_ d4bvma1 d4tkba\_ d4i3ba\_ d1bwya\_ d1ftpa\_ d1ggla\_  
d4gkca\_ d1cbia\_ d3p6da1 d1kqwa\_ d2a0aa1 d1dzka\_ d4tlja\_ d2a2ua\_  
d4wfva\_ d3t1da\_ d4iaxa\_ d3zq3a\_ d2nnda\_ d1i4ua\_ d1kxoa\_ d1bbpa\_  
d1kt7a\_ d1exsa\_ d3s26a1 d1lf7a\_ d1qfta\_ d4gh7a\_ d1z24a1 d1qabe\_  
d1xkia\_ d3bx7a\_ d4iawa1 d1n0sa\_ d1gkab\_ d3kzaa\_ d2k23a\_ d2l9ca1  
d2joza1 d1gm6a\_ d3kffa\_ d3saoa1 d1e5pa\_ d1yupa1 d1iiua\_ d4lu0a\_  
d1of8a\_ d3unda1 d3e9aa1 d1vr6a2 d1n8fa\_ d2qkfa\_ d1o60a\_ d1e69a\_  
d1mv5a\_ d3g60a4 g1ii8.1 d1ewqa2 d1ji0a\_ d1qhla\_ d1v43a3 d2wmfa1  
d1vpla\_ d1g2912 d4a82a2 g1f2t.1 d2d62a1 d3tuic1 d2bbsa1 d3g60a3  
d2ixea\_ d1g6ha\_ d1sgwa1 d2qi9c\_ d3r1fa1 d3b60a1 d3d31a2 d2pzea1  
g1xew.1 d1jj7a\_ d1oxk2 d2onka1 d1w1wa\_ d3gqba2 d1xp8a1 d1tf7a2  
d1tf7a1 d1ye8a1 d1skyb3 d2qe7d2 d4blta\_ d4huta\_ d3l1daa2 d4hyya\_  
d2i3ba1 d1cr1a\_ d3j9tb2 d3ntua2 d1vdza1 d2z43a\_ d1e9ra\_ d1nlfa\_  
d3ziaa2 d1n0wa\_ d1g6oa\_ d3ziad2 d3j9ta2 d1pzna2 d3gqbb2 d2i49a\_  
d1nnfa\_ d1xvxa\_ d1ursa\_ d1h3da1 d1iuda\_ d4m1va1 d1twya\_ d3e13x\_  
d2nxoa1 d4pfua\_ d3ttma\_ d1elja\_ d2qmwa1 d1us5a\_ d1y3na1 d1jeta\_

d1uqwa\_ d4f19a1 d2esna2 d3thia\_ d3fasa1 d2uyeb\_ d2xwva1 d1r91a\_  
d2fyia1 d1pb7a\_ d2ozza1 d1sw5a\_ d1nh8a1 d1vr5a1 d2g29a\_ d1xs5a\_  
d3lswa\_ d2z23a\_ d3w9va\_ d3tcha\_ d1q35a\_ d1z7me1 d3q27a\_ d1p99a\_  
d1ve4a1 d2i6ea1 d4mcoa1 d4n8ya\_ d1eu8a\_ d1zbma1 d1hsla\_ d1ixca2  
d1j1na\_ d1xvya\_ d1y9ua\_ d2z22a1 d1xoca1 d4oera\_ d1wdna\_ d5f1qa1  
d1xt8a1 d1i6aa\_ d4gwoa\_ d4igta1 d1pc3a\_ d4mmpa1 d1o63a\_ d2czla1  
d2onsa2 d4mija1 d1eh3a\_ d3skpa\_ d1dtza1 d1dtza2 d1ieja\_ d1jnf2  
d1ce2a1 d1jnf1a1 d1b1xa2 d1b1xa1 d1jw1a1 d1jw1a2 d1ryoa\_ d1h76a1  
d1h76a2 d1c4oa1 d2p6ra3 d2p6ra4 d1oywa2 d1oywa3 d1wrba1 d1w36b2  
d1w36b1 d1c4oa2 d3bora\_ d1t6na\_ d2eyqa5 d2eyqa3 d2eyqa2 d2zu6a2  
d1veca\_ d1uaaa1 d1w36d1 d2g9na1 d1z3ix2 d2rb4a\_ d1hv8a1 d1hv8a2  
d1t5ia\_ d1w36c2 d2j0sa2 d2j0sa1 d1fuka\_ d3hjha1 d1z5za1 d1z63a1  
d1s2ma2 d1s2ma1 d1wp9a1 d1wp9a2 d1gm5a3 d1gm5a4 d3dina4 d3dina3  
d1q0ua\_ d1w36c1 d1z3ix1 d1nkta3 d1nkta4 d1uaaa2 d1w36d2 g1qhh.1  
d2fwra2 d2fwra1 d3q3ma\_ d1za0a1 d1mxra\_ d2inca\_ d1jk0a\_ d2incb\_  
d1mhyb\_ d3hf1b\_ d1mtyb\_ d1r2fa\_ d2uw1a\_ d1mhyd\_ d3n37a\_ d1afra\_  
d1oquc\_ d1syya\_ d1mtyd\_ d2o1za\_ d1uzra\_ d1smsa\_ d2cbia2 d1gqia1  
d2choa2 d1oewa\_ d2qzxa\_ d2asia\_ d1psoe\_ d1miqa\_ d1smra\_ d2h6ta\_  
d1pfza\_ d1lizda\_ d3hd8a\_ d1j71a\_ d1dpja\_ d4aa9a\_ d1t6ex\_ g1b5f.1  
g1lya.1 g1htr.1 d1qdma2 d1bxoa\_ d1wkra\_ d1tzsa\_ d1libqa\_ d2qzwa\_  
d1bdqa\_ d3ggta\_ d3ixoa\_ d1mrxa\_ d2haha\_ d1tw7a\_ d4njsa\_ d1sgua\_  
d2p3da\_ d1nsoa\_ d3d3ta\_ d2rkfa\_ d1c6ya\_ d3ogpa\_ d3ekwa\_ d2o4na\_  
d2j9ja\_ d1baia\_ d3ggua\_ d3lzua\_ d4npua\_ d4j55a\_ d2r8na\_ d2fxda\_  
d2p3ca\_ d4dqea\_ d3ttpa\_ d3t3ca\_ d2p3aa\_ d2hc0a\_ d2fdda\_ d3mwsa\_  
d1k8rb\_ d1wgra1 d1ef5a\_ d1wfy1a1 d1e8ya3 d1wgya1 d1l1fda\_ d2cs4a1  
d1wxma1 d2byea1 d3kh0a1 d2byfa1 d1wxaa1 d1e7ua3 d4y18a1 d2a16a3  
d1l7ya\_ d1wgda1 d1wgg1a1 d4q5eb\_ d1wjna1 d1se9a\_ d3n3kb\_ d1wz0a1  
d1we6a1 d2m0xa\_ d2gbka\_ d3rt3b1 d1wh3a1 d1sifa\_ d2ekec2 d4ii2b1  
d4hk2a1 d1c3ta\_ d1m94a\_ d1wgha1 d1ttna1 d1j8ca\_ d1wx8a1 d3v6cb1  
d2ma9b\_ d4i6lb1 d1bt0a\_ d2jvca1 d1iyfa\_ d2k1fa\_ d1wxva1 d1wf9a1  
d1t0ya\_ d2io0b2 d1x1ma1 d2gbma\_ d1zw7a1 d2m17a\_ d1we7a1 d2lwp1a1  
d2gbja\_ d1wjua1 d1v6ea1 d1v86a1 d4eewa\_ d1w1aa1 d4icva\_ d4gu2a\_  
d1wx7a1 d1wy8a1 d4hjka1 d2faza1 d1v5oa1 d2fkza\_ d1zuj1a1 d1s3qa1  
d2fjca1 d1z6om1 d1veia\_ d4dyya\_ d1jiga\_ d3gvya\_ d2pyba\_ d4cy9a1  
d3bvfa1 d1r03a\_ d2cf7a\_ d1nf4a\_ d1zs3a1 d4iwka\_ d3ka8a\_ d3np0x\_  
d1n1qa\_ d1lb3a\_ d4e6ka\_ d1z6oa1 d2fzfa1 d4dyua\_ d3ge4a\_ d1jgca\_  
d4am4a\_ d2z6ma\_ d1ji5a\_ d1vlga\_ d1lko1a1 d1krqa\_ d3qz3a\_ d1o9ra\_  
d2ffxj\_ d1euma\_ d1yv1a1 d2v2pa\_ d1j30a\_ d4di0a\_ d1dpsa\_ d1jx4a2  
d3gv5b1 d1t94a2 d3bq0a2 d1g66a\_ d5ajha1 d2h0ba\_ d2erfa\_ d1h30a1  
d3mw4a1 d1pz7a\_ d2r1ba\_ d3v64a1 d1d2sa\_ d3bopa1 d3mw3a1 d1okqa1  
d1okqa2 d1wioa4 d1ccza2 d1vcaa1 d1dr9a2 d1lic1a1 d2d9qb1 d2nxyb2  
d2dara2 d2dara1 d1wyha2 d2dloa2 d1rutx4 d1rutx3 d2cuqa2 d1x4la2  
d1x4la1 d1x3ha2 d1x3ha1 d2d8za1 d1x61a2 d1x6aa1 d1x6aa2 d2cora2  
d2cora1 d1v6ga1 d1v6ga2 d2d8za2 d1x64a1 d1x64a2 d1b8ta1 d2co8a1

d1x63a2 d2dj7a2 d2dj7a1 d2cu8a2 d2cu8a1 d1g47a2 d1g47a1 d1j2oa1  
d1wyha1 d2dloa1 d1wiga1 d1wiga2 d2cupa2 d2cupa3 d1x68a1 d2d8ya2  
d2d8ya1 d1m3va2 d1x62a1 d1x68a2 d1x61a1 d1b8ta3 d1b8ta2 d2d8xa2  
d2d8xa1 d1x4ka1 d1x4ka2 d2cuqa1 d1m3va1 d2co8a2 d1j2oa2 d1x63a1  
d2cura1 d2cura2 d1x62a2 d2e3fa\_ d1mm0a\_ d2e3ea\_ d21lda\_ d2ny8x\_  
d2e3ga\_ d2ny9x\_ d2nz3a\_ d21j7a\_ d1n4na\_ d2m8bb1 d2kyqa\_ d3psma\_  
d1jkza\_ d1jxca\_ d2g11a\_ d1ug1a\_ d4uj0a\_ d2k4ua\_ d1hp2a\_ d2lu9a\_  
d1baha\_ d2meoa1 d1wm7a\_ d1hlya\_ d1n8ma\_ d1jlza\_ d1wpda\_ d1c55a\_  
d1pvza\_ d1wt7a\_ d1rjia\_ d1wz5a\_ d1m2sa\_ d1pjva\_ d1c49a\_ d1qkya\_  
d2ktca1 d1wmta\_ d1du9a\_ d1j5ja\_ d1r1ga\_ d1t0za\_ d2i61a\_ d1t1ta\_  
d1sn4a\_ d1kv0a\_ d21kba\_ d1npia\_ d1wwna\_ d1pe4a\_ d2kbka\_ d2li7a\_  
d1djta\_ d2kbha\_ d1dq7a\_ d1sega\_ d1omya\_ d1zywa1 d1jzaa\_ d1n9wa1  
d1bbua1 d1e1oa1 d1c0aa1 d1l0wa1 d3a74a1 d1eova1 d1iyjb4 d1iyjb5  
d1iyjb3 d1o7ia\_ d4ipca1 d1x3ea\_ d4apva\_ d1jb7a1 d1jb7a2 d1jb7a3  
d3kdfa\_ d1ue1b\_ d1wjja1 d3eiva\_ d1xjva2 d1xjva1 d2cca2 d1se8a\_  
d1l1oc\_ d1jb7b\_ d1qvca\_ d1qzga\_ d1miua4 d1miua5 d1miua3 d3g48a1  
d1gd7a\_ d1jjcb3 d1pyba\_ d3ubub\_ d1legia\_ d1qo3c\_ d1v7pa\_ d1tdqb\_  
d3ubua\_ d1c3ab\_ d1h8ua\_ d3bx4b\_ d1t8ca1 d1sb2a1 d1qdda\_ d2ziba1  
d3cada\_ d1byfa\_ d1j34b\_ d1jwia\_ d1jzna\_ d1c3aa\_ d1oz7b\_ d1wmza\_  
d3bdwb\_ d1hq8a\_ d1fifa1 d1dv8a\_ d3hupa\_ d1wk1a1 d1umra\_ d2afpa\_  
d3bx4a\_ d1sl6a\_ d1v7pb\_ d3g8ka\_ d1ixxa\_ d1j34a\_ d1jwib\_ d1g1sa1  
d1y17a1 d1ja3a\_ d1fvub\_ d3bdwa\_ d1sb2b1 d1fvua\_ d1umrc\_ d1oz7a\_  
d4m17a\_ d3cfwa1 d1ypqa1 d1g1ta1 d3fd4a\_ d3l9jc\_ d4dn8a1 d1v4lb\_  
d1rdl1\_ d2msba\_ d1prtc2 d1pfsa\_ d2a1ka\_ d1je5a\_ d1rpma\_ d2shpa1  
d1yfoa\_ d1l8ka\_ d2ooqa1 d1g4us2 d1p15a\_ d1lara2 d1lara1 d1wcha\_  
d2fh7a2 d2fh7a1 d1ohea1 d1ohea2 d2f4da\_ d1rxda\_ d2hxpа\_ d1xria\_  
d1d5ra2 d1fpza\_ d3ezza\_ d4y2ea\_ d3azya\_ d3wvja\_ d1upsa1 d1ajoa\_  
d2hyka\_ d1ajka\_ d2vy0a\_ d3o5sa\_ d3d6ea\_ d3atga\_ d1dypa\_ d1umza\_  
d3i4ia\_ d1c11a\_ d41bqa\_ d1a78a\_ d4no4a\_ d3zsja\_ d3duia\_ d1g86a\_  
d1is3a\_ d1qmja\_ d1hlca\_ d1tdha3 d1q3ba3 d1ee8a3 d1k82a3 g1qmo.1  
g1len.1 d3zyra\_ d1fnya\_ d1n47a\_ g21tn.1 d1avba\_ d3usua\_ d1dhkb\_  
d1f9ka\_ d1ukga\_ d1g8wa\_ d1g9fa\_ d1wbfa\_ d3wcsa\_ d1g7ya\_ g1loe.1  
d1mvqa\_ d1hq1a\_ d1v6ia\_ d1dbna\_ d1fx5a\_ d4l8qa\_ d1ioaa\_ d3n35a\_  
d1epwa1 d3h33a\_ d1rwja\_ d19hca\_ d1os6a\_ d3bxua\_ d3h4na\_ d1i77a\_  
d3caoa\_ d1j0pa\_ d2ctha\_ d1duwa\_ d1ofwa\_ d2e84a\_ d1hh5a\_ d1gyoa\_  
d3h34a\_ d1dszb\_ d1a6ya\_ d3cbba\_ d1ynwa1 d1r4ia\_ d1hcqa\_ d2hana\_  
d2hanb\_ d2enva1 d1kb4b\_ d2n11b\_ d1l01a\_ d1cita\_ d1adqa1 d1fnga1  
d1uvqb1 d1zs8a1 d2vola1 d2vola2 d1mfb12 d2jelh2 d1uwel2 d3qq4b1  
d1kjvb\_ d1k5na1 d1osph2 d4odh12 d1ow0a1 d1ow0a2 d1bfob2 d3l9ra2  
d3jtth1 d2fath2 d4elkb2 d1fn4b2 d2xfxb\_ d1pg7x2 d1cqka\_ d4k71b2  
d11k2a1 d1eapb2 d4lfhg2 d1i4fa1 d2nw2a2 d1kfah2 d1mhca1 d1h3ua1  
d1wejh2 d1h0db2 d1a5fh2 d1kcvh2 d1mjuh2 d1qqda1 d1kcrh2 d1k8ia1  
d3huja2 d2nnab1 d1nfd2 d3mffb2 d1s9va1 d11k3h2 d1q0x12 d1fv1b1  
d1neza1 d4rfeb2 d1r3ha1 d1a6tb2 d1kjva1 d1pz5b2 d1onqa1 d2bc4a2



d1de4a1 d1k8da1 d1tcra2 d1dn0b2 d1nfd2 d2xwtb2 d1bfoa2 d1mexh2  
d1iakb1 d1ypzf2 d4f7ea2 d1q72l2 d2fbjh2 d1fe8h2 d1clzh2 d1fngb1  
d1uvqa1 d1vgka1 d1c16a1 d4j12a2 d4x99b2 d1igtb3 d1je6a1 d1q72h2  
d1nldh2 d1teth2 d2hmic2 d1ilca2 d1ilca1 d1k8ib1 d1q0yh2 d1kfa12  
d3frua1 d1pg7w2 d1u58a1 d1igyb4 d1igyb3 d1hyrc1 d1klub1 d1deeb2  
d1c12b2 d2bc4b2 d2ig2h2 d1kcvl2 d3wn5b1 d1lk2b\_ d1lk3l2 d1mju12  
d1sm3h2 d1q0xh2 d1zvsal d1ydpal d1u8ib2 d1ypze2 d1kcuh2 d1lop9a\_  
d1y0la1 d1letzb1 d1legj11 d2gsib1 d1nj9a1 d4jfhd1 d1aqkl1 d1t2ja\_  
d1l04h1 d1zvya1 d3v4vl1 d4enec1 d1kxtb\_ d5e8ea1 d2pxya\_ d4weud\_  
d1xiwc\_ d2esvd1 d1qznh\_ d1ogae1 d1f4xh1 d4n1hb\_ d3ezjb1 d3mlwl1  
d1kfah1 d1etza1 d1b4jh1 d3cfic\_ d4w68a\_ d2arja1 d1ek3a\_ d2ok011  
d1vera\_ d1uwgh1 d1blnb1 d1fpth1 d1rzga1 d2giya1 d4m3kb1 d1nc2a1  
d2nyyd1 d1ncna\_ d1fbih1 d5dxwa\_ d4fqqa1 d1dqd1 d1jfq11 d1kelh1  
d1faih1 d1frgl1 d1figl1 d4m6n11 d1fo0a\_ d4hxb11 d3b5ga\_ d3quyd1  
d2h9gb1 d1i8kb\_ d2dd8h1 d2ck0h1 d1eaja\_ d4w6wb1 d2a6ib3 d1t66d1  
d2e27h\_ d1ob1b1 d1f11b1 d2v7na1 d1ad0a1 d2xt1b1 d1pskh1 d4i13b1  
d2op411 d1a0q11 d1uwell1 d1za3a1 d1ncb11 d4uu9a\_ d1bm3h1 d1cloh1  
d1nqba2 d1cf8h1 d4y5va\_ d1mhph1 d5anma1 d4cdgc1 d4ldeb\_ d1y0lb1  
d2pcpb1 d1z3gl1 d1dfb11 d1fh5h1 d3g5xa1 d1tzib1 d4dn3l1 d3zhka1  
d2b1hh1 d2uyla1 d1f3dh1 d1nj9b1 d2agjh1 d2h1p11 d1q72h1 d8fab11  
d1ndmb1 d1rjca1 d4u6hb1 d3upca\_ d2fbj11 d1osph1 d1tvda\_ d2cjh\_  
d4fhbd1 d1bd2d1 d1rz7h1 d3nn8a\_ d1blna1 d1knoa1 d1nfda1 d2bmkb1  
d1dq11\_ d1igyb1 d1igf11 d1e8h1 d3utza1 d1nc2b1 d1rihh1 d4mwfb1  
d4jvpa1 d1mieh1 d1rhfa1 d1fgn11 d1sbsh1 d1lp9e1 d1dn0a1 d4lqf11  
d1iaih1 d1kgcd1 d1mh5b1 d1gpol1 d2g60h3 d1f8t11 d2jixd1 d4grwh\_  
d1fo0b\_ d1bfob1 d1axsa1 d1u9ka\_ d1nmbh\_ d1h8na1 d1h8na2 d1jguh1  
d4eura1 d3sdy11 d35c8h1 d1w72l1 d1mvub\_ d1i9rh1 d1ob1a1 d4wenb\_  
d1yeeh1 d3ietc1 d1f58h1 d1ad0b1 d1mqk1\_ d1nbvh1 d4b50a\_ d3r8bb\_  
d1baf11 d1mamh1 d4rgne1 d2gsgb\_ d35c8l1 d1bafh1 d1ailh1 d2pcpa1  
d2fath1 d2x1pa\_ d1orsb1 d1ibgl1 d1shma\_ d1a2yb\_ d1u0qa\_ d2coqa\_  
d1hilb1 d1qfwi\_ d1jv5b\_ d1fn4b1 d5e0qa\_ d1nsnh1 d1plgl1 d4ocx11  
d1kb5h1 d1rzfh1 d1pg7x1 d2fx7h1 d2oi9c\_ d1l7il1 d3eyva1 d1d5il1  
d4ffyl\_ d1tet11 d1a6wh\_ d1lac6a\_ d3dvfa\_ d1nfd1 d1mimh1 d1ri8a1  
d1jhlh\_ d3dura\_ d1fskb1 d1f97a1 d3so3b1 d2ak4d1 d1lp9f1 d4z7wf1  
d1l7th1 d4y5ya\_ d4x7ec1 d1emth1 d1ikf11 d1nlbh1 d4utal1 d1bjma1  
d1eapb1 d1u6ah1 d2dtgd1 d1kj2b\_ d1xeda1 d1cleh1 d1fgvh\_ d2bnub1  
d2fb4h1 d2dtgb1 d1ktrh\_ d1jpth1 d1qkz11 d4hepg\_ d2atpb1 d1flrh1  
d2hrpl1 d1mvfa\_ d1iaim1 d3k80a1 d2jb5h1 d3zkxc\_ d4grwe\_ d1it9h1  
d1rhhb1 d3w9ec\_ d1e4wh1 d1sy6h1 d2j6eh1 d3qxta\_ d1jglh1 d1p7ka1  
d1tzhb1 d4n8pa1 d1gaf11 d2jelh1 d1wioa2 d4i0cc1 d1cicb1 d1lmka2  
d1lmka1 d1iqwh1 d1orqb1 d1ejoh1 d1jnlh1 d4zg1a\_ d43c9b\_ d1ggbl1  
d1wejh1 d3q6fa1 d1f3dj1 d3c6la1 d1bqlh1 d3p9wb\_ d1a3rl1 d1h0db1  
d2uzil\_ d1eo8l1 d1qfw1\_ d1n7ml1 d1igja1 d1c5ch1 d2a9mh\_ d1rmfh1  
d1fj1b1 d4heme\_ d1ccza1 d1a5fh1 d1ogad1 d1dlfh\_ d1qa9b\_ d1vgel1

d3qskb\_ d1sjxa\_ d4ozfg1 d1sq2n\_ d1qd0a\_ d1kcvh1 d1c5db1 d3qcul1  
d8faba1 d3bn9d1 d1mjuh1 d4y8dc\_ d7fabh1 d3dvgb1 d1lo0l1 d1a6tb1  
d1gigh1 d1kcrh1 d2hwz11 d1yjdc1 d3clfl1 d4krna\_ d1d17l\_ d1e6ol1  
d1mexh1 d3r0ma\_ d4kkna\_ d1fnsl1 d1oaqh\_ d1rzia1 d1ucbh1 d1ncwl1  
d4b41a\_ d1nfdfl1 d2mpah1 d2d7t11 d4grwf\_ d4b5ea\_ d1lk3h1 d3u79a\_  
d4u3xa\_ d1ghfl1 d1bvkb\_ d1mcww1 d1b88a\_ d1jrhh1 d32c2b1 d4wemb\_  
d1dsfh\_ d1op3h1 d1cell1 d1liqda1 d1qoka1 d1qoka2 d1qfuh1 d2crya1  
d1ay1h1 d1oaql\_ d3ab0b\_ d1rur11 d1t4kb1 d1bz7b1 d1n0xh1 d1for11  
d1ucbl1 d4w6yb\_ d43c9a\_ d2aab11 d1tzia1 d4n1ca\_ d1k6qh1 d3g9ab\_  
d4tvsal d1lghm\_ d1pz5b1 d3dx9a1 d3wxwh\_ d1nakh1 d1kcul1 d3eaka\_  
d4qlra1 d1cr9l1 d1d9ka\_ d1f4x11 d1deea1 d2i27n2 d1c12a1 d2orb11  
d1j8hd1 d1mcph1 d1c5da1 d1kenh1 d1bd2e1 d1h5ba\_ d4x7fc1 d3upaa\_  
d1t3fal d1indh1 d2dtgc1 d4hc111 d1zv5a1 d4wgvb\_ d1uwgl1 d4f37k1  
d1aqkh1 d1vesa\_ d3zkqd\_ d1fpt11 d1lo4l1 d1knob1 d3rrqa\_ d1ct8b1  
d4orz\_ d1mlbb1 d4hgkc1 d1dqd11 d1bogb1 d4ozhe1 d1dr9a1 d1i7za1  
d1dn0b1 d1kell1 d1rzi1 d1ypzf1 d1wtla\_ d1hkfa\_ d1fail1 d1figh1  
d2vyre\_ d1sjva\_ d1ohqa\_ d1bfoa1 d1pkqb1 d1mjul1 d1b4j11 d1nsl1  
d2arj1 d1p4bh\_ d4aj0a\_ d3nn8b\_ d2rcja1 d1f2xk\_ d4v1dd\_ d1adqh1  
d2eksa\_ d4k3ga\_ d1jfqh1 d1luweh1 d1frgh1 d4gftb\_ d1uz8b1 d4nlea\_  
d1bm3l1 d1clol1 d3mcka1 d2vq1a1 d1ae6h1 d4aq1b1 d1uj3b1 d1nbqa1  
d1fh5l1 d2ck0l1 d2ywza\_ d1q72l1 d4nxbx\_ d1hila1 d4hz1b1 d2j88l1  
d1zmya1 d1cd0a\_ d1a4ka1 d1psk11 d1a0qh1 d4krmb\_ d1ncbh1 d2fbjh1  
d1j8he1 d1i3ua\_ d1cf8l1 d1fe8h1 d2p1ya1 d1eeqa\_ d2x89a\_ d1ol0a\_  
d2r0lh1 d1ub5a1 d1dfbh1 d3eyvb1 d4jdvb1 d4p2cg\_ d2gsia1 d2agj11  
d1u3ha1 d2h1ph1 d1rihl1 d1fskc1 d1boga1 d2a77l1 d1ospl1 d1qfoa\_  
d3dwta\_ d2fx7l1 d1rz7l1 d3stba1 d1pkqa1 d1b6da1 d1dzba2 d1dzba1  
d1kj2a\_ d4l1ha\_ d1rzgb1 d1dq1h\_ d12e8l1 d1miel1 d1jmaa\_ d1sbs11  
d1fgnh1 d1f58l1 d1mqkh\_ d1ndgb1 d3qeg11 d1iail1 d2aw2a1 d1tqbc1  
d3fo2a1 d4dkaa\_ d1f8th1 d2g60l1 d2ywy\_ d1uj3a1 d1yc7a\_ d3bd3a\_  
d4w6xb1 d1nmb1\_ d1i8ka\_ d1rj1b1 d1ypze1 d1p7kb1 d1kxqe\_ d1gpoh1  
d2z4qa1 d1w72h1 d1i9r11 d4qgya1 d4xt1c\_ d2qqnh1 d1cica1 d3c08h1  
d2cd0a\_ d2bdnh1 d1hnga1 d1mam11 d1nldh1 d1cr9h1 d4lcih1 d3bkyh1  
d3gg7l1 d1ai1l1 d1kxvc\_ d4iosd\_ d1l7ih1 d2x1qa\_ d1ub6b1 d3k74b\_  
d1ibgh1 d1teth1 d1igya1 d1hxma1 d2x6ma\_ d2e7la\_ d5e03a\_ d1qfwm\_  
d2r0kh1 d1igjb1 d1rurh1 d1plgh1 d1mj8h1 d1yuhb1 d3fmg11 d1rzfl1  
d1emt11 d1ad9b1 d1igtb1 d1nlbl1 d1d5ih1 d3k7ua\_ d4ffyh\_ d1bwwa\_  
d3dvga1 d1a6ta1 d1fgvl\_ d4qxgl1 d1mim11 d1jh11\_ d2hffb1 d2hh0l1  
d1qkzh1 d1l7t11 d1afvh1 d1iaii1 d2cjuh\_ d1um5h1 d2ghwb2 d2ghwb1  
d1kgce1 d2fgwh1 d1ikfh1 d1dvfd\_ d2i24n1 d2xtjb\_ d1za3b1 d2yc1a\_  
d2hh0h1 d2x1oa\_ d1bvka\_ d1rj1a1 d5e7ba1 d1igta1 d1i11b1 d2fb4l1  
d1mvua\_ d1jpt11 d32c2a1 d1fvca\_ d1liqdb1 d2hrph1 d2p4ab\_ d4qo1a\_  
d1p2cb1 d1wt5c\_ d1t4ka1 d5c1mb\_ d1it9l1 d1bz7a1 d1b2wh1 d1e4wl1  
d1jnl11 d1yedb1 d1za6b1 d3u7aa\_ d1igfh1 d3gnml1 d1orsa1 d1wejl1  
d1a2ya\_ d1hxmb1 d1gafh1 d2j4wh1 d1pz5a1 d1j05a\_ d1a3rh1 d4fq111

d1qfwh\_ d1eo8h1 d1n7mh1 d4s11a\_ d1kegh1 d5da4a\_ d1iqwl1 d3whxb1  
d1vgeh1 d1deeb1 d1c12b1 d1t2ql1 d1ad9a1 d3gsnb1 d3b2uc1 d1ggbh1  
d1t3fb1 d1nakl1 d4ocmc\_ d1lila1 d2v7hb3 d2esve1 d1mcoh1 d2qr0b1  
d2q3aa\_ d1ct8a1 d1kcr11 d2pxyb\_ d2uzih\_ d5c3ld\_ d3durb\_ d1c5c11  
d2ak4e1 d1dl7h\_ d1xiwd\_ d1mlba1 d1rmfl1 d1i7zb1 d1dlfl\_ d2xa3a\_  
d5bq7b1 d1dqqb1 d3h4211 d1egjh1 d1kcv11 d1fe811 d2j6el1 d1f3rb2  
d1lk3l1 d1sm3h1 d1q0xh1 d1ghfh1 d7fabl1 d1igch1 d1lo0h1 d4idla\_  
d5c2b1\_ d1jrh11 d1l11a1 d3zhda1 d4kfzc\_ d1b0wa\_ d1e6oh1 d1mexl1  
d4krpb\_ d1fnsh1 d1ncwh1 d4hgma\_ d4eigb1 d4rzca\_ d2mpal1 d4y5xa\_  
d5en2b1 d3lrga1 d4ej1c1 d1rhha1 d1j05b\_ d1forh1 d1q9wb1 d2wzpd\_  
d2aq2a1 d1h0da1 d3revb1 d2ij0c1 d1tzha1 d4m7jl1 d1k6ql1 d3b9kc1  
d1igml\_ d3qeua1 d1dsfl\_ d1celh1 d1kcu11 d1zvha1 d1zvoa1 d1tqbb1  
d1ay1l1 d2qscl1 d2cgrh1 d1n10h1 d1ken11 d3eo0a1 d4n9ob1 d1n0xl1  
d3k1kc\_ d2cqva1 d1fhga\_ d2k1ma\_ d2d12a1 d1biha3 d1biha1 d1biha4  
d3qp3a1 d1glca\_ d1gxea\_ d1cvsc2 d1cvsc1 d1xmwa2 d1m4ka2 d2otpa2  
d1biha2 d1rhfa2 d2fcba2 d2fcba1 d1wwbx\_ d1gsma2 d1lepfa1 d1lepfa2  
d2dava1 d1waaa\_ d1f97a2 d1x44a1 d1vcaa2 d1fnla2 d1fnla1 d3b5ha2  
d3h8na2 d3h8na1 d1bjba1 d1bjba2 d1pd6a\_ d1f2qa2 d1f2qa1 d3cx2a\_  
d1nbqa2 d3b5ha1 d1n26a1 d1xiwb\_ d1xaua\_ d1fltx\_ d2ifga1 d1olla1  
d1olla2 d1cs6a4 d1cs6a3 d1cs6a2 d1cs6a1 d2gw5a2 d1sy6a1 d1xiwa\_  
d1ucta2 d1ucta1 d1ry7b2 d1qz1a3 d1olza1 d2c9aa1 d1wwca\_ d2aq2b1  
d1ck1a1 d1enfa1 d1i4pa1 d1vloa1 d1et9a1 d1esfa1 d2g9hd1 d4ohja1  
d1klud1 d1bxta1 d1ty0a1 d1fnua1 d1c4qa\_ d1prtc1 d2wv6d\_ d1prtf\_  
d1ltrd\_ d4l63b1 d1r4pb\_ d1prtd\_ d1tl0f\_ d2bosa\_ d1prtb1 d3chbd\_

**Family-34 (b.47.1.2)**

**Positive dataset contains 24 protein sequences.**

d2zchp\_ d3w94a\_ d1si5h\_ d3s9ba\_ d2anya\_ d1q3xa1 d4gsoa\_ d2f91a1  
d4nfea\_ d2rdla\_ d1spja\_ d1a7sa\_ d1yc0a\_ d2aiqa\_ d4k60a\_ d4dgja\_  
d1op0a\_ d3tjva\_ d2eeka\_ d3g01a\_ d4e7na\_ d1z8ga1 d3s69a\_ d4crga\_

**Negative dataset contains 4012 protein sequences.**

d1libja\_ d1c7na\_ d1iuga\_ d4q75a\_ d2bkwa1 d1t3ia\_ d1n8pa\_ d1qz9a\_  
d1jf9a\_ d1eg5a\_ d1p3wa\_ d3kgwa\_ d1c11a\_ d2ctza1 d1vjoa\_ d2rfva\_  
d1gc0a\_ d1cs1a\_ d1d2fa\_ d2ch1a1 d1qgna\_ d1pffa\_ d1elua\_ d1u08a\_  
d1lc5a\_ d1b5pa\_ d2ay1a\_ d1bw0a\_ d3pd6a\_ d7aata\_ d2csta\_ d1j32a\_  
d1fg7a\_ d4wlha\_ d1o4sa\_ d1v2da\_ d1gdea\_ d1m6sa\_ d1v72a1 d1svva\_  
d1ajsa\_ d1wsta1 d2f8ja2 d1lk9a\_ d1vp4a1 d1xi9a1 d2gb3a1 d1xkla\_  
d2wfla\_ d3i2ka1 d1lnsa3 d1mpxa2 d1xkta1 d2hfka\_ d5d3ka\_ d2cfba1  
d1dfoa\_ d1o69a\_ d1bj4a\_ d3k28a\_ d2bwpa\_ d3lg0a\_ d2fnua\_ d3ou5a\_  
d1z7da1 d1iaya\_ d4msoa\_ d1bs0a\_ d1s0aa\_ d1sffa\_ d3tqxa\_ d1mdoa\_  
d3qboa\_ d3pgya\_ d1bjna\_ d2dkja\_ d1ejia\_ d1vefa1 d4wxga\_ d3bs8a\_  
d3gbxa1 d1w23a\_ d2b5aa1 d2ofya1 d4mcxa\_ d2xi8a\_ d2icta\_ d2bnma1  
d2ppxa1 d1y7ya1 d1r0ka3 d1j5pa3 d1vkoa2 d1vm6a2 d3qvs2 d1gr0a2  
d1p1ja2 d1i26a\_ d1fwxa1 d1libya\_ d1f56a\_ d1bypa\_ d1azca\_ d1ws8a\_  
d3u25a\_ d1cuoa\_ d1lid2a\_ d1rkra\_ d2iaac\_ d4dp1x\_ d1nwpa\_ d2gima\_

d2i7sa\_ dlqhqa\_ d3ehbb1 dlfftb1 dlgyca3 dlhfua2 dlkbva1 dlkbva2  
d1sdda1 d1sdda2 dlgyca1 dlgyca2 d1mzya1 d2bw4a1 dlaoza1 dlaoza3  
dlaoza2 d1kyaa2 d1kyaa1 d1mzya2 d4e9sa1 d1sddb1 d1sddb2 dlhfua1  
dlhfua3 d1oe1a2 d1oe1a1 d1v10a2 d1v10a3 d1v10a1 dlrypd\_ dlirua\_  
dlrypc\_ d3unfk\_ dlrypa\_ dlj2pa\_ dlirui\_ dlj2qh\_ d3unfh\_ d1m4ya\_  
dlrypb\_ dlirul\_ dlirug\_ dlirua2\_ dlq5rh\_ dlrypg\_ dlq3ka\_ dliruf\_  
dlq5qa\_ d1e94a\_ dlirub\_ dlryph\_ d3ty6a\_ dliruj\_ dliruk\_ dlrype\_  
dlirud\_ dlirue\_ d3mi01\_ dlrypf\_ dliruh\_ d2z3ba\_ dliruc\_ d3mka2\_  
dlirul\_ d1a3qa1 d1iknc\_ d3brda1 d1p7hl1 d1oy3c\_ dlqgia1 dlzk9a1  
d2cxka1 d2bema\_ d1pama1 d1ea9c1 dlqhoa1 d2fhfa2 d2fhfa1 dlk3ia1  
dlj0ha1 d1cxla1 d2bhua1 d1edqa1 d1f1sa2 dlut9a2 dlqvia1 dltxka1  
d1zx5a1 d2phla2 d2phla1 d1fxza2 d1fxza1 d1lrha\_ dluija1 gldgw.1  
d2v09a\_ d1uika2 d1uika1 d1dgwa\_ d1ep0a\_ d2pa7a1 d1wlta1 d1nxma\_  
d2c0za1 d1f1ea\_ d1b67a\_ d2bjca1 d2hsga1 dlqpa1 d1efaa1 d1mqta\_  
d1d4m3\_ d1fmd3\_ d2mev1\_ g1aym.1 d1ev13\_ d4q4w1\_ dlrla3\_ d2x5ia\_  
d1rhi1\_ g1r1a.1 g1d4m.1 g1rhi.1 d1b35b\_ d1loopa\_ d1tme1\_ d4iv1a\_  
g1pvc.1 g1fpn.1 d1fpn1\_ d4gb31\_ d1d4m1\_ d1fmd1\_ d1ev11\_ d2wzr3\_  
d1qqp3\_ g1fmd.1 d2x5ic\_ d1rhi3\_ g1oop.1 d1hxs1\_ g1hxs.1 d1fpn3\_  
d1bev1\_ g2mev.1 d1eah3\_ d1aym1\_ d1pvc3\_ d1qqp1\_ d1zba3\_ d1h8ta\_  
d3vbhc\_ g1b35.1 g1bev.1 d1hxs3\_ g1ev1.1 d1bev3\_ g1tmf.1 d1tmf1\_  
d1b35a\_ d2mev3\_ g1eah.1 g1h8t.1 d1eah1\_ d4q4w3\_ dlrla1\_ d1aym3\_  
d1pvc1\_ d1zba1\_ d1h8tc\_ d1oopc\_ d1tme3\_ g1qqp.1 d4iv1c\_ g1tme.1  
d1au7a2 d1lic8a2 d3gpdg2 d2q49a2 d1hdgo2 d2g17a2 d2cvoa2 d2czca1  
d3pwka2 d1obfo2 d1i32a2 d1zyao2 d2pkqo2 d1b7go2 d2hjsa2 d1cf2o2  
d1vkna2 d1nvmb2 d2msya\_ d2djoa1 d2r5za\_ d1au7a1 d1f43a\_ d21mda1  
d1akhb\_ d1s7ea1 d3nara\_ dlzq3p1 d2craa1 d1mija\_ d4uuta\_ d3a01a\_  
d1x58a1 d3rkqa1 d3cmya1 d2cqxa1 d2da6a1 d1e3oc1 d1fjla\_ d1mh3a1  
d1x41a1 d1wh7a1 d1gt0c1 d2mw8a\_ d1lfup\_ d1x2ma1 d1b72a\_ d1wi3a1  
d1jgga\_ d1wjha1 d1x2na1 d1mnm\_ d2cuea1 d3k2aa\_ d2hosa\_ d2jwta2  
d1pufa\_ d1oactc1 d2hi3a\_ d1b8ia\_ d4j19a\_ d3lnqa\_ d1wh5a1 d1b8ib\_  
d1fexa\_ d2cqra1 d1guua\_ d1ug2a1 d2cqqa1 d2ajea1 d4a69c\_ d1h8ac1  
d2crga1 d2iw5b1 d1xc5a1 d2cu7a1 d1wgxa1 d2cjja1 d2ckxa1 d1gvda\_  
d1hcra\_ d1tc3c\_ d1gdtal d1u78a2 d6paxa1 d6paxa2 d1k78a2 d1xg1a1  
d1itya\_ d1hlva1 d1hlva2 d1iufa1 d1igna2 d1b10a1 d1b10a2 d1d5ya2  
d3lv8a\_ d1s3ga1 d1zaka1 d1s4qa\_ d3tvta2 d1uf9a\_ d1khta\_ d1ckea\_  
d1osna\_ d1p5zb\_ d4tmka\_ d3cm0a\_ d1jaga\_ d3h86a\_ d1t0hb\_ d1nn5a\_  
d2h92a\_ d3kb2a1 d2c95a1 d1yj5a2 d1kgda\_ d1ly1a\_ d2ak3a1 d1vyva2  
d1deka\_ d2grja1 d1p3ja1 d1y63a\_ d1e4ya1 d1s96a\_ d3iija1 d1lvga\_  
d1nksa\_ d1vyua2 d4e22a\_ d1qf9a\_ d1jjva\_ d1q3ta\_ d1ki9a\_ d1lw7a2  
d1teva\_ d1kjwa2 d1gsia\_ d2iyva2 d1viaa\_ d1e6ca\_ d1m7ga\_ d1x6va3  
d1g3ma\_ d1j99a\_ d1t8ta1 d1nsta\_ d1fmja\_ d1zrha\_ d1ls6a\_ d2a3ra\_  
d1aqua\_ d2zptx\_ d3ckla\_ d1texa\_ d1q44a\_ d2gwaha\_ d1odfa\_ d1uj2a\_  
d4gi7a\_ d2jeoa1 d1z0ja1 d3umra2 d3gj0a1 d2gaoa1 d1yzga1 d1x3sa1  
d1g7sa4 d1puja\_ d1udxa2 d1kk1a3 d2o52a\_ d1jwyb\_ d1zcaa2 d1zcba2

d2fv8a1 d2cjwa\_ d3dz8a1 d1xzpa2 d1vg8a\_ d4qxaa\_ d2ew1a1 d1x1ra1  
d2bcgy\_ d3doea1 d3cona\_ d3rega\_ d3wyga\_ d1upta\_ d2b6ha1 d1zd9a1  
d1lnza2 d1r5ba3 d1n0ua2 d1r2qa\_ d2f91a1 d2rhda\_ d3q3jb\_ d3q85a\_  
d1efma1 d1r8qa\_ d2gf9a1 d2akab1 d1ek0a\_ d1z08a1 d2gcoa1 d2dy1a2  
d4g01b\_ d2cxxa1 d1svia\_ d3q72a\_ d1ni3a1 d4ac9a4 d2erxa1 d2bmea\_  
d1wxqa1 d2gf0a1 d41dja1 d1zunb3 d1d5ca\_ d4lv5b\_ d1efca3 d1kmqa\_  
d2g6ba1 d3lrpa\_ d1tada2 d2y8ea\_ d4rd4a1 d1z06a1 d2heia\_ d3a58b\_  
d1u01a2 d1d2ea3 d1zj6a1 d2ocba\_ d3rwoa\_ d1mr3f\_ d2e9sa1 d4u5xa1  
d2iwra\_ d2fn4a1 d3bwdd\_ d2nzja1 d2atva1 d2ksqa\_ d3l43a\_ d1mkya2  
d1mkya1 d1wmsa\_ d1jn3a3 d2rmka\_ d1f60a3 d1gota2 d1jala1 d2fh5b1  
d1g16a\_ d2wblc\_ d1m7ba\_ d1wf3a1 d1f5na2 d1t9ha2 d1z6xa1 d1z0aa1  
d2fg5a1 d2a5ja1 d2bcjq2 d1s0ua3 d1ky3a\_ d4y0va\_ d4lhwa\_ d2qmea1  
d2atxa1 d1egaa1 d1ryha\_ d1moza\_ d1nrjb\_ d2erya1 d3bfka\_ d1puia\_  
d1fzqa\_ d3j3az1 d3t5ga\_ d1shza2 d3defa\_ d2f7sa1 d3raba\_ d3tsoa\_  
d3aq4a\_ d2a17a1 d3sfva1 d3bc1a\_ d2ncda\_ d1sdma\_ d3h4sa1 d2heha\_  
d2grya\_ g3kin.1 d1kk8a2 d1br2a2 d1goja\_ d1f9va\_ d2mysa2 d1lkxa\_  
d3t0qa\_ d4db1a1 d3gbja\_ d1ry6a\_ d1v8ka\_ d1vava\_ d1luaia\_ d1k8ka2  
d1k8ka1 d3uleb1 d3i33a2 d3i33a1 d1bupa1 d1dkgd2 d1dkgd1 d4ci6a2  
d1jcfa1 d4a2ba2 d2fxua1 d1yaga1 d4cbua2 d1bupa2 d1g99a2 d2e1za2  
d2e1za1 d1saza1 d1saza2 d1iqca2 d1iqca1 d1eb7a2 d1eb7a1 d1nmla2  
d3hljd1 d1hroa\_ d4gedb\_ d3zooa\_ d1mz4a\_ d1gu2a\_ d1f1fa\_ d1dvva\_  
d1c6ra\_ d1c75a\_ d1e29a\_ d1gdva\_ d1cnoa\_ d1h32b\_ d1co6a\_ d2bh4x\_  
d2aiua\_ d5cytr\_ d1jdl\_ d1i8oa\_ d2zboa\_ d3dmia\_ d1ls9a\_ d1wvec\_  
d2yk3a\_ d3ph2b\_ d1dw0a\_ d5aura\_ d1ql3a\_ d1qn2a\_ d1f1ca\_ d4zzva\_  
d2xspa\_ d1eg1a\_ d4v20a\_ d1ojja\_ d4ipma1 d1gpia\_ d4csia\_ d3pfza\_  
d3ovwa\_ d2yoka\_ d2nqya\_ d1h4ga\_ d1oa2a\_ d1olra\_ d3b7ma\_ d4h7ma1  
d3wp3a\_ d2vgda\_ d1ligoa\_ d3zsea\_ d2nlra\_ d3wx5a\_ d1oa3a\_ d1pvxa\_  
d1m4wa\_ d1f5ja\_ d1oa4a\_ d1ks5a\_ d4ixla1 d3sita1 d1evsa\_ d1cnt1\_  
d1pvhb\_ d1z7ca\_ d1huwa\_ d1bgea\_ d1rhga\_ d1f6fa\_ d1f45b\_ d1l1rb\_  
d1letea\_ d3tgxb\_ d1scfa\_ d2z3qa1 d3qb1a\_ d1hula\_ d1m48a\_ d4nkqb\_  
d1leera\_ d1v7mv\_ d5e4ea\_ d2o27a\_ d3b5ka\_ d2psma1 d4zf7a\_ d3uf5a\_  
d4x51a\_ d1d9ca\_ d4ypgc1 d3oq3a\_ d1lqsl\_ d1n1fa\_ d1lau1a\_ d1wu3i\_  
d3bes1\_ d3ux9a\_ d2b71a\_ d3rbaa\_ d2qtra\_ d1nupa\_ d3l92a\_ d1f9aa\_  
d1qjca\_ d2h29a\_ d1vlha\_ d1lw7a1 d1mrza2 d4ruka\_ d2e17a\_ d1liq0a2  
d1irxa2 d1r6ta2 d1livsa4 d2cyba\_ d1rqga2 d1j09a2 d2yxna\_ d1f7ua2  
d1h3fa1 d1ffya3 d2g36a1 d1jila\_ d1n3la\_ d1i6la\_ d1pfva2 d1h3na3  
d3n9ia\_ d3sz3a1 d1m4la\_ d2bk7a\_ d3fjua\_ d1z5ra1 d1kwma1 d1jqga1  
d2c1ca1 d1tda\_ d1h81a2 d3sw2a\_ d1moxc\_ d1dx5i3 d1autl2 d1autl1  
d1nqlb\_ d1dva11 d1szba2 d1kigl\_ d2y5f1\_ d1ijqa2 d1gk5a\_ d1g1sa2  
d1nt0a3 d1xdtr\_ d1lmja2 d1lmja1 d1nzia2 d2wphe\_ d1klil\_ d1pfxl2  
d1pfxl1 d1p9ja\_ d1g1ta2 d1f7ea\_ d4yzub\_ d2mgpa1 d1b9wa2 d2mgpa2  
d1oblcl d1oblcl2 d1n1ia2 d1n1ia1 d2npra2 d2npra1 d1qx2a\_ d2y5ia\_  
d1qlsa\_ d1psra\_ d3n22a\_ d2egda\_ d4ggfc\_ d2wcea\_ d2luca\_ d4aqia\_  
d3nsia\_ d2lp3a\_ d1j55a\_ d1a4pa\_ d1k8ua\_ d1pvaa\_ d3fs7a\_ d2pvba\_

d1ttxa\_ d1rwya\_ d2kyfa\_ d1rk9a\_ d1a75a\_ d1exra\_ d1tiza1 d1nyaa\_  
d1g8ia\_ d1ggwa\_ d1wdcc\_ d3fwba\_ d1ggza\_ d2o5ga\_ d1ctaa\_ d1m45a\_  
d3i5gc\_ d1s18a\_ d1fpwa\_ d2scpa\_ d2roaa\_ d4aqra\_ d3pn7b\_ d1br1b\_  
d2mysb\_ d1s6ca\_ d1bjfa\_ d2obha\_ d1jfk\_ d1jff0a\_ d1qv0a\_ d1lkja\_  
d2mlfc\_ d2m97a\_ d2d8na\_ d4by5a\_ d1jbaa\_ d4nqga\_ d1wdcb\_ d2mysc\_  
d1j7qa\_ d1s6ia\_ d1uhka2 d1r2ua\_ d1dtla\_ d3kf9a\_ d3pn7c\_ d1gjya\_  
d1y1xa\_ d1hqva\_ d1dvia\_ d1df0a1 d1qxp2 d4usla\_ d1k94a\_ d1wkya2  
d1uuqa\_ d3wh9a\_ d4m1ra\_ d1xyza\_ d4xuya\_ d2je8a5 d4bf7a1 d3cuia\_  
d1ur4a\_ d1qw9a2 d1odza\_ d2vzsa5 d1bqca\_ d2x2ya1 d1qnra\_ d4y7ea1  
d1vjza\_ d4k68a\_ d2v3ga\_ d4hpga\_ d1nofa2 d1nq6a\_ d1h4pa\_ d1aq0a\_  
d3ziza\_ d4bs0a\_ d1ecea\_ d1h1na\_ d1ta3b\_ d1w91a2 d1l1wa\_ d1uhva2  
d1us3a2 d1egza\_ d7a3ha\_ d1tvna1 d3nyda1 d1ghsa\_ d2cyga1 d4xv0a\_  
d2c8na2 d1w32a\_ d3emca\_ d1v6ya1 d1foba\_ d2uwfa1 d2fgla\_ d3niya1  
d2c0ha1 d1rh9a1 d1yq2a5 d1szna2 d1fa2a\_ d1pama4 d5do8a1 d1ea9c3  
d1hx0a2 d2fhfa5 d1qhoa4 d1avaa2 d1m53a2 d4m8ua1 d2gjpa2 d1lwha2  
d4howa1 d1ktba2 d1j0ha3 d3vm5a1 d2x1ia\_ d1wzaa2 d1uasa2 d2diea1  
d1mxga2 d1ht6a2 d1eswa\_ d1liv8a2 d5cpsa\_ d1ud2a2 d1zjaa1 d3gbea1  
d1kwga2 d1wdpa\_ d1gcya2 d1g5aa2 d1hvxa2 d3dhpa2 d2bhua3 d4do4a1  
d3qgva1 d1e43a2 d1g94a2 d2d3na2 d1gjwa2 d1gvia3 d1x1na1 d1r7aa2  
d1tz7a1 d4c7ga2 d2gjxa1 d1nowa1 d1jaka1 d1yhta1 d4toqa\_ d1wb0a1  
d1w9pa1 d1eoka\_ d1litxa1 d1kfwa1 d1goia2 d1ledqa2 d2gsja\_ d1hjxa1  
d1vf8a1 d1etob\_ d1umqa\_ d1g2ha\_ d2w0pa\_ d2diaa1 d2e9ia2 d2e9ja1  
d2dj4a1 d2eeba1 d2diba1 d2dmba1 d2dmca1 d2d7oa1 d2ee6a1 d2d7pa1  
d2eeaa1 d2di8a1 d1wlha1 d2d7na1 d2nqca\_ d2d7ma1 d2dica1 d3cnka\_  
d2k3ta1 d2eeca1 d1qfha1 d2bp3a1 d1v05a\_ d2ee9a1 d2eeda1 d2di9a1  
d3syxa1 d1mkea1 d2p8va\_ d1xoda1 d1i7aa\_ d1evha\_ d1qc6a\_ d2hmta\_  
d1lssa\_ d1b9ra\_ d1offa\_ d1frra\_ d3wcqa\_ d1e9ma\_ d1l5pa\_ d1wria\_  
d1i7ha\_ d3av8a\_ d1czpa\_ d1rfka\_ d3p1ma1 d3b2ga\_ d2bt6a2 d3nvva1  
d1krha3 d2h88b1 d1n62a2 d1t3qa2 d1kf6b2 d1zoyb1 d1jq4a\_ d1dgja2  
d1rm6c2 d9ldta1 d2ewda3 d1up7a1 d2dfda1 d1s6ya1 d1vjta1 d7mdha1  
d1hyea1 d1t2da1 d1ojsa3 d1b8pa1 d1ldna1 d1hyha1 d1civa1 d2a92a1  
d1ez4a1 d1i0za1 d1y6ja1 d1gv0a1 d1ur5a1 d1llda1 d1lobba1 d1v8ba1  
d1gdha1 d1l7da1 d2dlda1 d1mx3a1 d1ygya1 d1qp8a1 d1li4a1 d2naca1  
d1npya1 d3t4ea2 d1a4ia1 d1o0sa1 d2hk9a2 d2egga2 d1b26a1 d1bvua1  
d1gq2a1 d1clda1 d1leha1 d1gtma1 d1euzal d3dona2 d1ledza1 d1gpja2  
d1vi2a1 d1p77a1 d1nyta1 d1b0aa1 d1vl6a1 d1v9la1 d3wdpp1 d3wq5a\_  
d4gxpa\_ d4hz8a\_ d1e4mm\_ d3aiua\_ d1wcca1 d1qvba\_ d3ahxa\_ d1v02a\_  
d2dgaa\_ d1pbga\_ d1vffa1 d1qoxa\_ d4ha4a\_ d1kola2 d1f8fa2 d1qora2  
d1jqba2 d1vj0a2 d1cdoa2 d1gu7a2 d1d1ta2 d1xa0a2 d2dm6a2 d1jvba2  
d1rjwa2 d1llua2 d1h2ba2 d1tt7a2 d1piwa2 d1o89a2 d1iz0a2 d1e3ja2  
d1yb5a2 d1uufa2 d1vj1a2 d1e3ia2 d3gpdg1 d1vc2a1 d2nvwal d1u8fo1  
d1ydwa1 d1hdgo1 d2g17a1 d1cf2o1 d2czca2 d1r0ka2 d1lobfo1 d2cvoa1  
d1ebfa1 d1h6da1 d1i32a1 d1zh8a1 d2q49a1 d1qkia1 d1j5pa4 d3pzra1  
d1xeaa1 d1vkoa1 d1vm6a3 d3qvsa1 d2pkqo1 d1b7go1 d1gr0a1 d1p1ja1

d1lc0a1 d1j0xo1 d3pwka1 d2hjsa1 dlzyao1 dlvkna1 d1t1ta1 d1nvmb1  
d3sjua\_ d3ojfa1 d1xu9a1 d2jjya1 d1n7ha\_ d1y1pa1 d1h5qa\_ d1jtva\_  
d4fs3a\_ d2bkaa1 d1gy8a\_ d2c5aa1 d1ulsa\_ d1ooea\_ d2b69a1 d1y5ma1  
d1spxa\_ d1aela\_ d1bxka\_ d1ydea1 d1gega\_ d1hdoa\_ d1o5ia\_ d1e6ua\_  
d1snya1 d2rhca\_ d3zv4a\_ d5ceja\_ d2d1ya1 d1fjha\_ d3w8ea\_ d2fmua1  
d1x1ta\_ d1rpna\_ d3ay7a1 d1k2wa\_ d1eq2a\_ d2hrba1 d3ruaa\_ d2ew8a1  
d4hwka\_ d1xgka\_ d2bd0a1 d1yo6a1 d2a35a1 d2ntva\_ d1vl8a\_ d1hdca\_  
d4bkua\_ d2ag5a1 d2q45a\_ d1nffa\_ d4iy1a\_ d1zbqa1 d1kewa\_ d1ek6a\_  
d1ja9a\_ d2q46a2 d1iy8a\_ d1cyda\_ d2ptga\_ d1hxha\_ d1uzma1 d3lyla\_  
d4m89a\_ d3weya\_ d2b1la1 d1w6ua\_ d1sb8a\_ d2q2va\_ d4nr0a\_ d1e6wa\_  
d2gasa\_ d3oiga1 d2bgka1 d1mxha\_ d1vl0a1 d1rkxa\_ d1r6da\_ d1wmaa1  
d1e7wa\_ d2c07a1 d1xkqa\_ d3tzha\_ d1g0oa\_ d3lz6a\_ d1qyca\_ d1ledoa\_  
d1gz6a\_ d1oc2a\_ d1t2aa\_ d1zema1 d2xoxa\_ d1z45a2 d1geea\_ d1p33a\_  
d31t0a\_ d4e6pa\_ d2wyua\_ d1db3a\_ d4q9na\_ d1xhla\_ d4o1ma\_ d1fmca\_  
d2uvda\_ d2gdza1 d1uaya\_ d2z1ma\_ d2o23a2 d2fr1a2 d2fr1a1 d1qsga\_  
d1qyda\_ d4zjua\_ d2a4ka1 d1yb1a\_ d1wvga1 d1yxma1 d3f4ba\_ d1mg5a\_  
d1xg5a1 d1r55a1 d3gboa\_ d1atla\_ d1kufa\_ d1buda\_ d4q1la\_ d1yp1a\_  
d1wnia\_ d2gfoa1 d1vjva\_ d2ayna1 d3nhea\_ d3nqyb\_ d4gera\_ d1g0da4  
d2f4ma1 d1x3za\_ d1t3ca\_ d1epwa3 d2a97a\_ d3f1ea\_ g1e1h.1 d3ioqa\_  
d1fh0a\_ d1o0ea\_ d1khqa\_ d1m6da\_ d2cb5a\_ d1cs8a\_ g8pch.1 d1s4va\_  
d2pnsa\_ d1vsna1 d1mira\_ d1liwda\_ d2oula\_ d7pcka\_ d3bwka\_ d3bcna\_  
d2p86a\_ d1pvja\_ d1pcia\_ d1gece\_ d1deua\_ d4bs6a\_ d1xkga1 d1cqda\_  
d1jqpa2 d2c0ya\_ d2bdza\_ d3p5ua\_ d2o36a\_ d1k9xa\_ d1ex4a2 d1c6va\_  
d2jk6a2 d2jk6a1 d1fecal d1fecal d1lpfa1 d1lpfa2 d1xhca1 d1xhca2  
d1dxla2 d1dxla1 d1gera2 d1m6ia2 d1onfa1 d3lada2 d3lada1 d1w4xa1  
d1w4xa2 d1gesa2 d1mo9a1 d1xdia1 d1fl2a2 d1fl2a1 d1fcda1 d1fcda2  
d1h6va2 d1h6va1 d1mo9a2 d1gv4a2 d1gv4a1 d2gv8a2 d2gv8a1 d1aoga1  
d1aoga2 d1hyua1 d1ebda1 d1ebda2 d3dk9a1 d1q1ra2 d1q1ra1 d1gesa1  
d1g4ma1 d1ps9a2 d1lqta1 d1cjca1 d1pn0a1 d1reoal d1ju2a1 d2f5va1  
d3c96a1 d2gmha1 d1gpea1 d1o5wa1 d1n4wa1 d1k0ia1 d2dw4a2 d2ivda1  
d1seza1 d2voua1 d1kdga1 d2bcgg1 d2bcgg2 d1wgqa1 d1v89a1 d2coda1  
d1zc3b\_ d1wg7a1 d1u5ea1 d1v61a1 d2coca1 d2ys1a1 d1v5pa1 d1ntya2  
d1wjma1 d1wi1a1 d1u29a\_ d1xx0a1 d1unqa\_ d2zkmx3 d1fhoa\_ d1v88a1  
d2adza1 d1x1fa1 d1p6sa\_ d2coaa1 d1btka\_ d1v5ma1 d1faoa\_ d2x18a\_  
d1dyna\_ d1x1ga1 d4kaxb\_ d2j59m1 d1ki1b2 d1xcga2 d1txda2 d1u5da1  
d1dbha2 d1wlha\_ d1upqa\_ d1v5ua1 d1foea2 d2fjla1 d1eaza\_ d2dfka2  
d2cofa1 d1kz7a2 d1jmxal d1pbya1 d1pbya2 d1r7ha\_ d1faaa\_ d1wika1  
d1xfla\_ d1ttza1 d2f51a1 d1ti3a\_ d1nhoa\_ d1sena\_ d2i4aa\_ d1ep7a\_  
d1zmaa1 d1fo5a\_ d3lefa1 d3diea1 d2yana1 d1z6na1 d1oaza\_ d3zywa1  
d4aj8a\_ d1nm3a1 d4fiwa\_ d1wmja\_ d4hs1a1 d1iloa\_ d1xwaa1 d1wjka1  
d2vmla\_ d1fb6a\_ d1gh2a\_ d1h75a\_ d1nw2a\_ d1kx5b\_ d3a6na\_ d4m6ba2  
d2nqbd\_ d3wkjd\_ d2yfwe\_ d4h9na\_ d5bnxa\_ d1kx5c\_ d3r45a\_ d1eqzb\_  
d4jjnb\_ d1f66c\_ d1eqza\_ d4wnnb\_ d1kx5a\_ d1u35c1 d1id3a\_ d2nqbc\_  
d1kx5d\_ d3us3a3 d3us3a1 d1tafa\_ d1bh9b\_ d1tafb\_ d1jfib\_ d1q9ca\_

d1h3ob\_ d2byka1 d1n1ja\_ d4g92b\_ d1bh9a\_ d1jfia\_ d2bykb1 d1n1jb\_  
d1pd212 d1nhya2 d2a2ra2 d1k0dd2 d1f2ea2 d1gsua2 d1f3ba2 d2fhea2  
d2pvqa1 d1tw9a2 d1oyja2 d1e6ba2 d1k0ma2 d3ik7a1 d4is0a1 d1r5aa2  
d1jlva2 d1m0ua2 d3gtub2 d1z9ha2 d1okta2 d1axda2 d2gsra2 d1tu7a2  
d1k3ya2 d1zgma1 d1b48a2 d1gnwa2 d1gwca2 d2gsta2 d1glqa2 d1oe8a2  
d1pn9a2 d1fw1a2 d1duga2 d3vrda1 d3vrda2 d1fcdc2 d1fcdc1 d1h1oa2  
d1h1oa1 d1m70a2 d2trcp\_ d1lig8a1 d1czan2 d1czan1 d1lig8a2 d1czan4  
d1bg3a4 d1bg3a3 d1bg3a2 d1bg3a1 d1qsaa2 d1txga2 d3f47a1 d1mv8a2  
d2pv7a2 d1xc2a3 d2ahra2 d4xiya1 d2f1ka2 d1pgja2 d1i36a2 d1np3a2  
d1lj8a4 d1teaa3 d1qmga2 d2i76a2 d2g5ca2 d1wdka3 d1dlja2 d3cuma3  
d1qqya\_ d1gd6a\_ d1f6ra\_ d1livma\_ d2gv0a\_ d1iiza\_ d2z2fa\_ d1j8xa\_  
d1b9oa\_ d1741a\_ d1691a\_ d2o4wa\_ d1p37a\_ d1k28a3 d1xjta1 d1jtma\_  
d2f2qa\_ d4e97a1 d2pjsa1 d1k1la\_ d2i7ra1 d1ecsa\_ d1xqaa1 d5cj3a1  
d1npba\_ d2p7oa\_ d1r9ca\_ d1nkia\_ d1mpya2 d1kw3b2 d1kw3b1 d4ghga1  
d1tfza1 d3isqa1 d3isqa2 d1sqia1 d1sqia2 d1lkda2 d1lkda1 d1cjxa2  
d1cjxa1 d1sp9b2 d1t47a1 d1t47a2 d1f1ua2 d1sp8a1 d1sp8a2 d1flua1  
d1s5ja2 d1qhta2 d4dlea2 d1tgoa2 d3py8a2 d1q8ia2 d1kfsa2 d2py5a2  
d1d5aa2 d1qsta\_ d2beia1 d4m3sa\_ d1u6ma1 d1ygha\_ d1yk3a1 d3dr6a\_  
d1xmta\_ d1z4ea1 d2ge3a1 d2fiaa1 d2jdca1 d1y9wa1 d3to7a\_ d1wwza1  
d2fl4a1 d2ozua1 d2b5ga\_ d2cy2a1 d2p0wa\_ d1cm0a\_ d4pswa\_ d1yrea1  
d1yr0a1 d1m4ia\_ d2gana1 d1yvka1 d1ghea\_ d2g3aa1 d1y7ra1 d2euia1  
d1q2ya\_ d2fsra1 d1xeba\_ d2ae6a1 d1cjwa\_ d1qsma\_ d2aj6a1 d1y9ka1  
d1i12a\_ d1vkca\_ d2atra1 d1n71a\_ d2d4pa1 d2fiwa1 d2fe7a1 d1tiqa1  
d2ou2a\_ d1yx0a1 d2fcka1 d1p0ha\_ d2j8ma\_ d2pq8a\_ d1z4ra1 d1s3za1  
d1ufha\_ d1c4qa\_ d1prtcl d2wv6d\_ d1prtfl d1ltrd\_ d4l63b1 d1r4pb\_  
d1prtd\_ d1tl0f\_ d2bosa\_ d1prtb1 d3chbd\_ d1xvqa1 d1pn0a2 d3hy2a\_  
d2cvba1 d1o8xa\_ d1lu4a\_ d1we0a1 d2bmxal d2a4va1 d1psqa\_ d1xiya1  
d1q98a\_ d1n8ja\_ d1zofa1 d2ggta\_ d3tjja\_ d4je1a1 d1o73a\_ d3s9fa\_  
d2zcta\_ d1qmva\_ d1jfua\_ d2b1ka\_ d5dvba1 d2b5xa1 d2v2ga\_ d1st9a\_  
d3tb2a\_ d4llra\_ d4fh8a1 d1e2ya\_ d1knga\_ d2h30a\_ d1i5ga\_ d2z9sa\_  
d2f8aa1 d1tp9a1 d2b7ka\_ d1nm3a2 d3hvva\_ d2wfca1 d4kcea\_ d1xvwa1  
d4gqca1 d3qpma\_ d4k1fa\_ d1zzoa1 d1gp1a\_ d4od7a1 d1z6ma1 d4mcua1  
d4dvca1 d1r4wa\_ d3l9sa\_ d1un2a\_ d3rppa\_ d3kasa1 d3bi1a3 d1e88a1  
d1l6ja5 d1l6ja4 d1eaka4 d1eaka3 d1l6ja3 d1h8pa2 d1h8pa1 d1logpa1  
d1dy2a\_ d1gyta2 d4l3wa\_ d1llfa\_ d1gz7a\_ d1lukca\_ d1cr6a2 d1c4xa\_  
d2rhwa\_ d2ftba\_ d1pmpa\_ d2rcqa1 d1fdqa\_ d4lkpa\_ d1sa8a\_ d1vyfa\_  
d1lpja\_ d3vg7a1 d4azqa1 d1o8va\_ d5bvqa\_ d1p6pa\_ d2qo4a\_ d1lopba\_  
d1yiva1 d1o1va\_ d4bvma1 d4tkba\_ d4i3ba\_ d1bwya\_ d1ftpa\_ d4gkca\_  
d1cbia\_ d3p6da1 d1kqwa\_ d2a0aa1 d3zxha\_ d1cgla\_ d1rm8a\_ d1hy7a\_  
d2jsda\_ d1cxva\_ d1hv5a\_ d1i76a\_ d1g12a\_ d3p0ya1 d1lgra1 d1lgra2  
d1n8yc2 d1n8yc1 d1m6ba2 d1m6ba1 d1sr9a2 d1rqba2 d2tbvc\_ d1c8nc\_  
d1x36a\_ d1smvc\_ d1ng0c\_ d4sbvc\_ d1lopa\_ d1f2nc\_ d1cixa\_ d1y29a\_  
d1v7fa\_ d2jtba\_ d1d1ha\_ d1g9pa\_ d1lupa\_ d1qk7a\_ d1mb6a\_ d2a2va\_  
d1niya\_ d1i25a\_ d1hvwa\_ d2mpqa\_ d1ie6a\_ d1kqha\_ d1la4a\_ d2mxoa1



d1d10a\_ d1koza\_ d1qk6a\_ d1emxa\_ d1lqra\_ d1c6wa\_ d1rmka\_ d1eyoa\_  
d1cnaa\_ d1fu3a\_ d1g1pa\_ d1f3ka\_ d1fyga\_ d4lu0a\_ d1of8a\_ d3unda1  
d3e9aa1 d1vr6a2 d2qkfa\_ d1d9ea\_ d1o60a\_ d1jgta2 d1ofda3 d1ea0a3  
d1ecfa2 d1q15a2 d1ct9a2 d1te5a\_ d1y14b1 d2nn6i1 d1i94l\_ d2zjra2  
d1smxa\_ d2qamc2 d1hh2p1 d2r7da1 d1rl2a2 d1wfqa1 d3bzka4 d1x6oa2  
d3a0ja\_ d2j01d2 d2ja9a1 d4q15a\_ d1luza\_ d2n3sa\_ d2vnud1 d1h95a\_  
d1go3e1 d2nn6h1 d1ne3a\_ d2mo1a\_ d1iz6a2 d1jjga\_ d1e3pa2 d2ix0a3  
d2ix0a2 d2lxja\_ d1ueba3 d1ueba2 d2z0sa1 d1u0la1 d2ix0a1 d2eifa2  
d2je6i1 d3i2za1 d2c35b1 d2ahob2 d1t9ha1 d3i4oa\_ d2qall1 d1jt8a\_  
d2nn6g1 d1g6pa\_ d3cama\_ d1i94q\_ d1c9oa\_ d1d7qa\_ d2ba0a1 d2vnud2  
d2vnud3 d1khia2 d2qalq1 d1wi5a1 d1xtda2 d1ny4a\_ d4w9ta\_ d4x2ra1  
d1ka9f\_ d1qo2a\_ d4axka1 d1thfd\_ d1h5ya\_ d4u28a\_ d2y88a\_ d4wd0a\_  
d1vzwa1 d1eixa\_ d3exra\_ d2ffca1 d2fdsa1 d3n3ma1 d2czda\_ d1q6oa\_  
d2yyua\_ d1vqta1 d1dbta\_ d3ldva1 d1prtc2 d2r80b\_ d1cqxa1 d1cg5a\_  
d3boma\_ d2h8fb\_ d2raoa\_ d3bj1a\_ d4hrrb\_ d2r50a\_ d3d1kb\_ d2aa1b1  
d3zhwa\_ d3hf4b\_ d3gdja\_ d1jebb\_ d3bj1b\_ d1x9fb\_ d1wmub\_ d1gcva\_  
d3bcqb\_ d3d4xb\_ d1gvha1 d2dc3a\_ d3hf4a\_ d4yu3a\_ d3k8ba\_ d1qpwb\_  
d2r80a\_ d3bcqa\_ d1v4wa\_ d3wtgb\_ d1jl7a\_ d4esaa\_ d1a9we\_ d3d1ab\_  
d1fsla\_ d4h21a\_ d1v4wb\_ d1mwca\_ d1vhba\_ d1jeba\_ d1spgb\_ d1h97a\_  
d1q1fa\_ d1tu9a1 d3d1aa\_ d1hdsb\_ d3hyub\_ d2zfb\_ d3fs4a\_ d1oj6a\_  
d1shrb\_ d4h21b\_ d4yu3b\_ d1spga\_ d3hrwa\_ d3qqra\_ d3at5a\_ d4wchd\_  
d3hyua\_ d1cg5b\_ d1uc3a\_ d1hbra\_ d2raob\_ d1outb\_ d4esab\_ d3gdjb\_  
d3qqqa\_ d1x9fc\_ d3vrfa\_ d1litha\_ d3mkba\_ d3d4xa\_ d3mjpa\_ d1jl6a\_  
d3fh9a\_ d1outa\_ d2dc3b\_ d1lit2a\_ d3eoka\_ d3g46a\_ d1qpwa\_ d3vrfb\_  
d1ch4a\_ d1x9fd\_ d1hdsa\_ d2zfb\_ d3mkbb\_ d1or4a\_ d3wtga\_ d1a4fa\_  
d3fh9b\_ d3bomb\_ d3cy5a\_ d3at5b\_ d1x9fa\_ d2oifa\_ d4lmb\_ d3v57a\_  
d1kn1a\_ d1cpca\_ d4f0ta\_ d2vjha\_ d4po5b\_ d1eyxa\_ d1alla\_ d4f0tb\_  
d1b33b\_ d1b8db\_ d4h0mb\_ d1b33a\_ d2vjhb\_ d4lm6b\_ d2vmlb\_ d1allb\_  
d2vjta\_ d3dbja\_ d2vmla\_ d2vjtb\_ d4f0ub\_ d1f99b\_ d4rmpa1 d1liaa\_  
d1eyxb\_ d2uulb\_ d4lmsb\_ d4f0ua\_ d2bv8a\_ d1f99a\_ d2bv8b\_ d2c71b\_  
d3dbjb\_ d4rmpb1 d1b8da\_ d4h0ma\_ d3v57b\_ d1kn1b\_ d1liab\_ d2uula\_  
d2j96a\_ g1gxs.1 d4ekfa\_ d2ckga\_ d1th0a\_ d2bkra\_ d2xqfa\_ d1ea5a\_  
d1f6wa\_ d1dx4a\_ d1qe3a\_ d1k4ya\_ d4qwwa\_ d2ha2a\_ d1r88a\_ d1sfra\_  
d4qeka\_ d3c8da2 d2pbla1 d1jkma\_ d1jjia\_ d1lzla\_ d4iuaa3 d4bvva\_  
d5hpga\_ d3k65a\_ d1ki0a3 d1ki0a2 d1ki0a1 d1a0ha1 d1pmla\_ d3sp8a3  
d2feba1 d1dosa\_ d3qm3a1 d2fjka\_ d1f74a\_ d3l21a\_ d2e1da\_ d1to3a1  
d1w3ia\_ d1sfla\_ d1vcva1 d4imea\_ d1wa3a\_ d2ocza1 d1f2ja\_ d3m16a\_  
d2yxga\_ d1ub3a\_ d3a5fa\_ d1fbaa\_ d1l6wa\_ d1xfba1 d1wx0a1 d1vpxa1  
d1ojxa\_ d1mxsa\_ d2a4aa1 d1xkya1 d3cq0a1 d3s1xa\_ d1f05a\_ d1fdja\_  
d3cpra1 d4d2ja\_ d1cg2a1 d1yloa2 d1y7ea2 d1y0ya3 d1lfwa1 d1vixa1  
d1fnoa4 d1vh0a2 d1ysja1 d1vhea2 d1z21a1 d2fvga2 d1vgya1 d1r3na1  
d2grea2 d1xmba1 g1q71.1 d1rtqa\_ d4aw8a\_ d1ra6a\_ d1muka\_ d3gsza\_  
d1khva\_ d1te9a\_ d2xwha\_ d3uqsa\_ d3hkwa\_ d3n6ma\_ d2cjqa\_ d2xyma\_  
d1teba\_ d1te8a\_ d1s48a\_ d1u09a1 d4wfxa\_ d3tyqa\_ d2pgga1 d1dzka\_

d4tlja\_ d2a2ua\_ d4wfva\_ d3t1da\_ d4iaxa\_ d3zq3a\_ d2nnda\_ dli4ua\_  
d1kxoa\_ d1bbpa\_ d1kt7a\_ d1exsa\_ d3s26a1 d1lf7a\_ d1qfta\_ d4gh7a\_  
d1z24a1 d1qabe\_ d1xkia\_ d1ew3a\_ d3bx7a\_ d4iawa1 d1n0sa\_ d1gkab\_  
d3kzaa\_ d2k23a\_ d2l9ca1 d2joza1 d1gm6a\_ d3kffa\_ d3saoa1 d1e5pa\_  
d1yupa1 d1iiua\_ d1e69a\_ d1mv5a\_ d3g60a4 g1ii8.1 d1ewqa2 d1ji0a\_  
d1ghla\_ d1v43a3 d2wmfa1 d1vpla\_ d1g2912 d4a82a2 g1f2t.1 d2d62a1  
d3tuic1 d2bbsa1 d3g60a3 d2ixea\_ d1g6ha\_ d1sgwa1 d2qi9c\_ d3rlfa1  
d3b60a1 d3d31a2 d2pzea1 g1xew.1 d1jj7a\_ d1oxxk2 d2onka1 d1w1wa\_  
d1iwea\_ d1qf5a\_ d1vmaa2 d1nija1 d1np6a\_ d2p67a1 d3ihla\_ d1okkd2  
d1ls1a2 d1s1ma2 d1iona\_ d2v40a\_ d1dj3a\_ d3hida\_ d2vo1a1 d2g0ta1  
d1vcoa2 d1j8mf2 d1g3qa\_ d1xjca\_ d1p9ba\_ d1qzxa3 d1ihua2 d1ihua1  
d2qm8a\_ d1dj2a\_ d4ioja\_ d1cp2a\_ d1yrba2 d3gqba2 d1skye3 d1xp8a1  
d1tf7a2 d1tf7a1 d1ye8a1 d1skyb3 d2qe7d2 d4blta\_ d4huta\_ d3l1daa2  
d4hyya\_ d2i3ba1 d1cr1a\_ d3j9tb2 d3ntua2 d1vdza1 d2z43a\_ d1e9ra\_  
d1nlfa\_ d3ziaa2 d1n0wa\_ d1g6oa\_ d3ziad2 d3j9ta2 d1pzna2 d3gqbb2  
d2i49a\_ d1nnfa\_ d1xvxa\_ d1ursa\_ d1h3da1 d1iuda\_ d4mlva1 d1twya\_  
d3e13x\_ d2nxoa1 d4pfua\_ d3ttma\_ d1elja\_ d2qmwa1 d1us5a\_ d1y3na1  
d1jeta\_ d1uqwa\_ d4f19a1 d2esna2 d3thia\_ d3fasa1 d2uyeb\_ d2xwva1  
d1r9la\_ d2fyia1 d1pb7a\_ d2ozza1 d1sw5a\_ d1nh8a1 d1vr5a1 d2g29a\_  
d1xs5a\_ d3lswa\_ d2z23a\_ d3w9va\_ d3tcha\_ d1q35a\_ d1z7me1 d3q27a\_  
d1p99a\_ d1ve4a1 d2i6ea1 d4mcoa1 d4n8ya\_ d1eu8a\_ d1zba1 d1hsla\_  
d1ixca2 d1j1na\_ d1xvya\_ d1y9ua\_ d2z22a1 d1xoca1 d4oera\_ d1wdna\_  
d5f1qa1 d1xt8a1 d1i6aa\_ d4gwoa\_ d4igta1 d1pc3a\_ d4mmpa1 d1o63a\_  
d2czla1 d2onsa2 d4mija1 d1eh3a\_ d3skpa\_ d1dtza1 d1dtza2 d1ieja\_  
d1jnfa2 d1ce2a1 d1jnfal d1b1xa2 d1b1xa1 d1jw1a1 d1jw1a2 d1ryoa\_  
d1h76a1 d1h76a2 d1c4oa1 d2p6ra3 d2p6ra4 d1oywa2 d1oywa3 d1wrba1  
d1w36b2 d1w36b1 d1c4oa2 d3bora\_ d1t6na\_ d2eyqa5 d2eyqa3 d2eyqa2  
d2zu6a2 d1veca\_ d1uaaa1 d1w36d1 d2g9na1 d1z3ix2 d2rb4a\_ d1hv8a1  
d1hv8a2 d1t5ia\_ d1w36c2 d2j0sa2 d2j0sa1 d1fuka\_ d3hjha1 d1z5za1  
d1qdea\_ d1z63a1 d1s2ma2 d1s2ma1 d1wp9a1 d1wp9a2 d1gm5a3 d1gm5a4  
d3dina4 d3dina3 d1q0ua\_ d1w36c1 d1z3ix1 d1nkta3 d1nkta4 d1uaaa2  
d1w36d2 g1qhh.1 d2fwra2 d2fwra1 d3q3ma\_ d1za0a1 d1mxra\_ d2inca\_  
d2incb\_ d1mhyb\_ d3hf1b\_ d1mtyb\_ d1r2fa\_ d2uw1a\_ d1mhyd\_ d3n37a\_  
d1afra\_ d1oquc\_ d1syya\_ d1mtyd\_ d2o1za\_ d1uzra\_ d1smsa\_ d2fkza\_  
d1zujal d1s3qa1 d2fjca1 d1z6om1 d1veia\_ d4dyya\_ d1jiga\_ d3gvya\_  
d2pyba\_ d4cy9a1 d3bvfa1 d1r03a\_ d2cf7a\_ d1nf4a\_ d1zs3a1 d4iwka\_  
d3ka8a\_ d3np0x\_ d1n1qa\_ d1lb3a\_ d4e6ka\_ d1z6oa1 d2fzfa1 d4dyua\_  
d3ge4a\_ d1jgca\_ d4am4a\_ d2z6ma\_ d1ji5a\_ d1vlga\_ d1lkoal d1krqa\_  
d3qz3a\_ d1o9ra\_ d2ffxj\_ d1euma\_ d1yv1a1 d2v2pa\_ d1j30a\_ d4di0a\_  
d1dpsa\_ d2cbia2 d2choa2 d1l8na1 d1oewa\_ d2qzxa\_ d2asia\_ d1psoe\_  
d1miqa\_ d2h6ta\_ d1pfza\_ d1lizda\_ d3hd8a\_ d1j71a\_ d1dpja\_ d4aa9a\_  
d1t6ex\_ g1b5f.1 g1lya.1 g1htr.1 d1qdma2 d1bxoa\_ d1wkra\_ d1tzsa\_  
d1libqa\_ d2qzwa\_ d1zoya1 d1d4ca2 d1chua2 d1jnra2 d1kf6a2 d3ggta\_  
d3ixoa\_ d1mrxa\_ d2haha\_ d1tw7a\_ d4njsa\_ d1sgua\_ d2p3da\_ d1nsoa\_

d3d3ta\_ d2rkfa\_ d1c6ya\_ d2rspa\_ d3ogpa\_ d3ekwa\_ d2o4na\_ d2j9ja\_  
d1baia\_ d3ggua\_ d3lzua\_ d4npua\_ d4j55a\_ d2r8na\_ d2fxda\_ d2p3ca\_  
d4dqea\_ d3ttpa\_ d3t3ca\_ d2p3aa\_ d2hc0a\_ d2fdda\_ d3mwsa\_ d1um8a\_  
d1ixza\_ d1qvra2 d1qvra3 d1qzma\_ d1sxjc2 d1jr3d2 d2p65a\_ d1l8qa2  
d1g8pa\_ d3hu3a3 d1sxjd2 d1njfa\_ d1in4a2 d1sxja2 d1tuea1 d2ce7a2  
d1w5sa2 d1sxjb2 d1d2na\_ d1ny5a2 d1ofha\_ d2gnoa2 d2a5yb3 d1fnna2  
d1u0ja1 d1lv7a\_ d1iqpa2 d2fnaa2 d1ixsb2 d4gita\_ d1sxje2 d1g41a\_  
d1js3a\_ d3rcha\_ d3k40a\_ d1k8rb\_ d1wgra1 d1ef5a\_ d1wfy1 d1e8ya3  
d1wgya1 d2cs4a1 d1wxma1 d2byea1 d3kh0a1 d2byfa1 d1wxaa1 d1e7ua3  
d1h4ra3 d4yl8a1 d2a16a3 d1wgda1 d1wgg1 d4q5eb\_ d1wjna1 d1se9a\_  
d3n3kb\_ d1wz0a1 d1we6a1 d2m0xa\_ d2gbka\_ d3rt3b1 d1wh3a1 d1sifa\_  
d2ekek2 d4ii2b1 d4hk2a1 d1c3ta\_ d1m94a\_ d1wgha1 d1ttna1 d1j8ca\_  
d1wx8a1 d3v6cb1 d2ma9b\_ d4i6lb1 d1bt0a\_ d2jvca1 d1iyfa\_ d2k1fa\_  
d1wxva1 d1wf9a1 d1t0ya\_ d2io0b2 d1x1ma1 d2gbma\_ d1zw7a1 d2m17a\_  
d1ud7a\_ d1we7a1 d2lwpa\_ d2gbja\_ d1wjua1 d1v6ea1 d1v86a1 d4eewa\_  
d1wiaa1 d4icva\_ d4gu2a\_ d1wx7a1 d1wy8a1 d4hjka1 d2faza1 d1v5oa1  
d3ruib\_ d1eo6a\_ d3waob\_ d2r2qa1 d3m95a\_ d3wana\_ d2a13a1 d2cr5a1  
d1wj4a1 d3ubra\_ d1qo8a1 d1d4ca1 d2k3va\_ d1ft5a\_ d1qdba\_ d1m1qa\_  
d2j7aa\_ d1h21a\_ d1ogyb\_ d4fasa\_ d1oaha\_ d1sp3a\_ d1s5ja1 d2hbja2  
d2igia\_ d1wlja\_ d1qhta1 d4dlea1 d1tgoa1 d2f96a1 d3tr8a1 d3mxma\_  
d1q8ia1 d1y97a1 d1w0ha\_ d1kfsa1 d2py5a1 d1noya\_ d1d5aa1 d1yt3a3  
d2guia\_ d3mwp1 d4kb1a\_ d1wioa4 d1ccza2 d1vcaa1 d1dr9a2 d2d9qb1  
d2nxyb2 d2dara2 d2dara1 d1wyha2 d2dloa2 d1rutx4 d1rutx3 d2cuqa2  
d1x41a2 d1x41a1 d1x3ha2 d1x3ha1 d2d8za1 d1x61a2 d1x6aa1 d1x6aa2  
d2cora2 d2cora1 d1v6ga1 d1v6ga2 d2d8za2 d1x64a1 d1x64a2 d1b8ta1  
d2co8a1 d1x63a2 d2dj7a2 d2dj7a1 d2cu8a2 d2cu8a1 d1g47a2 d1g47a1  
d1j2oa1 d1wyha1 d2dloa1 d1wiga1 d1wiga2 d2cupa2 d2cupa3 d1x68a1  
d2d8ya2 d2d8ya1 d1m3va2 d1x62a1 d1x68a2 d1x61a1 d1b8ta3 d1b8ta2  
d2d8xa2 d2d8xa1 d1x4ka1 d1x4ka2 d2cuqa1 d1m3va1 d2co8a2 d1j2oa2  
d1x63a1 d2cura1 d2cura2 d1x62a2 d2e3fa\_ d1mm0a\_ d2e3ea\_ d2l1da\_  
d2ny8x\_ d2e3ga\_ d2ny9x\_ d2nz3a\_ d2l1j7a\_ d1n4na\_ d2m8bb1 d2kyqa\_  
d3psma\_ d1jkza\_ d1jxca\_ d2g11a\_ d1ugla\_ d4uj0a\_ d2k4ua\_ d1hp2a\_  
d2lu9a\_ d1baha\_ d2meoa1 d1wm7a\_ d1hlya\_ d1n8ma\_ d1jlza\_ d1wpda\_  
d1c55a\_ d1pvza\_ d1wt7a\_ d1rjia\_ d1wz5a\_ d1m2sa\_ d1pjva\_ d1c49a\_  
d2ktca1 d1wmta\_ d1du9a\_ d1j5ja\_ d1r1ga\_ d1t0za\_ d2i61a\_ d1t1ta\_  
d1sn4a\_ d1kv0a\_ d2l1kba\_ d1npia\_ d1wwna\_ d1pe4a\_ d2kbka\_ d2li7a\_  
d1djta\_ d2kbha\_ d1dq7a\_ d1sega\_ d1omya\_ d1zywa1 d1jzaa\_ d1n9wa1  
d1bbua1 d1c0aa1 d1b8aa1 d1l0wa1 d3a74a1 d1eova1 d1iyjb4 d1iyjb5  
d1iyjb3 d1o7ia\_ d4ipca1 d1x3ea\_ d4apva\_ d1jb7a1 d1jb7a2 d1jb7a3  
d3kdfa\_ d1ue1b\_ d1wjja1 d3eiva\_ d1xjva2 d1xjva1 d2ccza2 d1se8a\_  
d1l1oc\_ d1jb7b\_ d1qvca\_ d3ulla\_ d1qzga\_ d1miua4 d1miua5 d1miua3  
d3g48a1 d1gd7a\_ d1mkha\_ d1jjcb3 d1pyba\_ d3ubub\_ d1legia\_ d1qo3c\_  
d1v7pa\_ d1tdqb\_ d3ubua\_ d1c3ab\_ d1h8ua\_ d3bx4b\_ d1t8ca1 d1sb2a1  
d1qdda\_ d2ziba1 d3cada\_ d1byfa\_ d1j34b\_ d1jwia\_ d1jzna\_ d1c3aa\_

d1oz7b\_ d1wmza\_ d3bdwb\_ d1hq8a\_ d1fifa1 d1dv8a\_ d3hupa\_ d1wk1a1  
d1umra\_ d2afpa\_ d3bx4a\_ d1gz2a\_ d1sl6a\_ d1v7pb\_ d3g8ka\_ d1ixxa\_  
d1j34a\_ d1jwib\_ d1g1sa1 d1y17a1 d1ja3a\_ d1fvub\_ d3bdwa\_ d1sb2b1  
d1fvua\_ d1umrc\_ d1oz7a\_ d4m17a\_ d3cfwa1 d1ypqa1 d1g1ta1 d3fd4a\_  
d3l9jc\_ d4dn8a1 d1v4lb\_ d1rd1l\_ d2msba\_ d1dgsa2 d1ckma1 d1p16a1  
d1x9na2 d1rpma\_ d2shpa1 d1yfoa\_ d1l8ka\_ d2ooqa1 d1g4us2 d1p15a\_  
d1lara2 d1lara1 d1wcha\_ d2fh7a2 d2fh7a1 d1ohea2 d2f4da\_ d1rxda\_  
d2hxpa\_ d1xria\_ d1d5ra2 d1fpza\_ d3ezza\_ d4y2ea\_ d1i9sa\_ d3azya\_  
d3wvja\_ d1upsa1 d1ajoa\_ d2hyka\_ d1ajka\_ d2vy0a\_ d1o4ya\_ d3o5sa\_  
d3d6ea\_ d3atga\_ d1dypa\_ d1umza\_ d3i4ia\_ d1c1la\_ d4lbqa\_ d1a78a\_  
d1slta\_ d4no4a\_ d3zsja\_ d3duia\_ d1g86a\_ d1is3a\_ d1hlca\_ d1tdha3  
d1q3ba3 d1ee8a3 d1k82a3 g1qmo.1 g1len.1 d3zyra\_ d1fnya\_ d1n47a\_  
g2ltn.1 d1avba\_ d3usua\_ d1dhkb\_ d1f9ka\_ d1lukga\_ d1g8wa\_ d1g9fa\_  
d1wbfa\_ d3wcsa\_ d1g7ya\_ d1mvqa\_ d1hq1a\_ d1v6ia\_ d1dbna\_ d1qnwa\_  
d1fx5a\_ d4l8qa\_ d1ioaa\_ d3n35a\_ d2h0ba\_ d2erfa\_ d1h30a1 d3mw4a1  
d1pz7a\_ d2r1ba\_ d3v64a1 d1d2sa\_ d3bopa1 d3mw3a1 d1okqa1 d1okqa2  
d1dszb\_ d1a6ya\_ d3cbba\_ d1ynwa1 d1r4ia\_ d1hcqa\_ d2hana\_ d2hanb\_  
d2enva1 d1kb4b\_ d2nllb\_ d1lola\_ d1cita\_ d1adqa1 d1fnga1 d1uvqb1  
d1zs8a1 d2vola1 d2vola2 d1mfb12 d2jelh2 d1uwel2 d3qq4b1 d1kjbv\_  
d1k5na1 d1osph2 d4odh12 d1ow0a1 d1ow0a2 d1bfob2 d3l9ra2 d3jtth1  
d2fath2 d4elkb2 d1fn4b2 d2xfxb\_ d1pg7x2 d1cqka\_ d4k71b2 d1lk2a1  
d1eapb2 d4lfhg2 d1i4fa1 d2nw2a2 d1kfah2 d1mhca1 d1h3ua1 d1wejh2  
d1h0db2 d1a5fh2 d1kcvh2 d1mjuh2 d1qqda1 d1kcrh2 d1k8ia1 d3huja2  
d2nnab1 d1nfd2 d3mffb2 d1s9va1 d1lk3h2 d1q0x12 d1fv1b1 d1neza1  
d4rfeb2 d1r3ha1 d1a6tb2 d1kjva1 d1pz5b2 d1onqa1 d2bc4a2 d1de4a1  
d1k8da1 d1tcra2 d1dn0b2 d1nfde2 d2xwtb2 d1bfoa2 d1mexh2 d1iakb1  
d1ypzf2 d4f7ea2 d1q72l2 d2fbjh2 d1fe8h2 d1clzh2 d1fngb1 d1uvqa1  
d1vgka1 d1c16a1 d4j12a2 d4x99b2 d1igtb3 d1je6a1 d1q72h2 d1nldh2  
d1teth2 d2hmic2 d1ilca2 d1ilca1 d1k8ib1 d1q0yh2 d1kfa12 d3frua1  
d1pg7w2 d1u58a1 d1igyb4 d1igyb3 d1hyrc1 d1klub1 d1deeb2 d1c12b2  
d2bc4b2 d2ig2h2 d1kcv12 d3wn5b1 d1lk2b\_ d1lk3l2 d1mjul2 d1sm3h2  
d1q0xh2 d1zvsal d1ydpal d1u8ib2 d1ypze2 d1kcuh2 d1lop9a\_ d1y0la1  
d1letzb1 d1egj11 d2gsib1 d1nj9a1 d4jfhd1 d1aqk11 d1t2ja\_ d1lo4h1  
d1zvya1 d3v4v11 d4enec1 d1kxtb\_ d5e8ea1 d2pxya\_ d4weud\_ d1xiwc\_  
d2esvd1 d1qnzh\_ d1ogae1 d1f4xh1 d4n1hb\_ d3ezjb1 d3mlw11 d1kfah1  
d1letza1 d1b4jh1 d3cfic\_ d4w68a\_ d2arja1 d1ek3a\_ d2ok011 d1vera\_  
d1uwgh1 d1blnb1 d1fpth1 d1rzga1 d2giya1 d4m3kb1 d1nc2a1 d2nyyd1  
d1ncna\_ d1fbih1 d5dxwa\_ d4fqqa1 d1dqdh1 d1jfq11 d1kelh1 d1faih1  
d1frgl1 d1figl1 d4m6n11 d1fo0a\_ d4hxb11 d3b5ga\_ d3quyd1 d2h9gb1  
d1i8kb\_ d2dd8h1 d2ck0h1 d1eaja\_ d4w6wb1 d2a6ib3 d1t66d1 d2e27h\_  
d1ob1b1 d1f11b1 d2v7na1 d1ad0a1 d2xt1b1 d1pskh1 d4i13b1 d2op411  
d1a0ql1 d1uwel1 d1za3a1 d1ncb11 d4uu9a\_ d1bm3h1 d1cloh1 d1nqba2  
d1cf8h1 d4y5va\_ d1mhph1 d5anma1 d4cdgc1 d4ldeb\_ d1y0lb1 d2pcpb1  
d1z3gl1 d1dfb11 d1fh5h1 d3g5xa1 d1tzib1 d4dn311 d3zhka1 d2b1hh1

d2uy1a1 d1f3dh1 d1nj9b1 d2agjh1 d2h1pl1 d1q72h1 d8fabbl d1ndmb1  
d1rjca1 d4u6hb1 d3upca\_ d2fbj11 d1osph1 d1tvda\_ d2cjev\_ d4fhbd1  
d1bd2d1 d1rz7h1 d3nn8a\_ d1blna1 d1knoa1 d1nfda1 d2bmkb1 d1dq11\_  
d1lgyb1 d1lign1 d12e8h1 d3utza1 d1nc2b1 d1rihh1 d4mwfb1 d4jvpa1  
d1mieh1 d1rhfa1 d1fgn11 d1sbsh1 d1lp9e1 d1dn0a1 d4lqfl1 dliaih1  
d1kgcd1 d1mh5b1 d1gpol1 d2g60h3 d1f8t11 d2jixd1 d4grwh\_ d1fo0b\_  
d1bfob1 d1axsa1 d1u9ka\_ d1nmbh\_ d1h8na1 d1h8na2 d1jguh1 d4eura1  
d3sdy11 d35c8h1 d1w7211 d1mvub\_ d1i9rh1 d1ob1a1 d4wenb\_ d1yeeh1  
d3ietc1 d1f58h1 d1ad0b1 d1mqk1\_ d1nbvh1 d4b50a\_ d3r8bb\_ d1baf11  
d1mamh1 d4rgne1 d2gsgb\_ d35c811 d1bafh1 d1ai1h1 d2pcpa1 d2fath1  
d2x1pa\_ d1orsb1 d1ibgl1 d1shma\_ d1a2yb\_ d1u0qa\_ d2coqa\_ d1hilb1  
d1qfwi\_ d1jv5b\_ d1fn4b1 d5e0qa\_ d1nsnh1 d1plgl1 d4ocx11 d1kb5h1  
d1rzhf1 d1pg7x1 d2fx7h1 d2oi9c\_ d1l7i11 d3eyva1 d1d5i11 d4ffyl\_  
d1tet11 d1a6wh\_ d1ac6a\_ d3dvfa\_ d1nfdel d1mimh1 d1ri8a1 d1jhlh\_  
d3dura\_ d1fskb1 d1f97a1 d3so3b1 d2ak4d1 d1lp9f1 d4z7wf1 d1l7th1  
d4y5ya\_ d4x7ec1 d1emth1 d1likf11 d1nlbh1 d4uta11 d1bjma1 d1eapb1  
d1u6ah1 d2dtgd1 d1kj2b\_ d1xeda1 d1cleh1 d1fgvh\_ d2bnub1 d2fb4h1  
d2dtgb1 d1ktrh\_ d1jpth1 d1qkz11 d4hepg\_ d2atpb1 d1flrh1 d2hrpl1  
d1mvfa\_ d1iaim1 d3k80a1 d2jb5h1 d3zkxc\_ d4grwe\_ d1it9h1 d1rhhb1  
d3w9ec\_ d1e4wh1 d1sy6h1 d2j6eh1 d3qxta\_ d1jglh1 d1p7ka1 d1tzhb1  
d4n8pa1 d1gaf11 d2jelh1 d1wioa2 d4i0cc1 d1cicb1 d1lmka2 d1lmka1  
d1iqwh1 d1orqb1 d1ejoh1 d1jnlh1 d4zg1a\_ d43c9b\_ d1ggbl1 d1wejh1  
d3q6fa1 d1f3dj1 d3c6la1 d1bqlh1 d3p9wb\_ d1a3r11 d1h0db1 d2uzil\_  
d1eo811 d1qfw1\_ d1n7ml1 d1lign1 d1c5ch1 d2a9mh\_ d1rmfh1 d1fj1b1  
d4heme\_ d1ccza1 d1a5fh1 d1ogad1 d1dlfh\_ d1qa9b\_ d1vgel1 d3qskb\_  
d1sjxa\_ d4ozfg1 d1sq2n\_ d1qd0a\_ d1kcvh1 d1c5db1 d3qcul1 d8faba1  
d3bn9d1 d1mjuh1 d4y8dc\_ d7fabh1 d3dvgb1 d1lo011 d1a6tb1 d1gigh1  
d1kcrh1 d2hwz11 d1yjdcl d3clfl1 d4krna\_ d1dl71\_ d1e6ol1 d1mexh1  
d3r0ma\_ d4kkna\_ d1fns11 d1loaqh\_ d1rzia1 d1ucbh1 d1ncw11 d4b41a\_  
d1nfdfl d2mpah1 d2d7t11 d4grwf\_ d4b5ea\_ d1lk3h1 d3u79a\_ d4u3xa\_  
d1ghfl1 d1bvkb\_ d1mcww1 d1b88a\_ d1jrhh1 d32c2b1 d4wemb\_ d1dsfh\_  
d1op3h1 d1cell1 d1iqda1 d1qoka1 d1qoka2 d1qfuh1 d2crya1 d1ay1h1  
d1oagl\_ d3ab0b\_ d1rur11 d1t4kb1 d1bz7b1 d1n0xh1 d1for11 d1lucb11  
d4w6yb\_ d43c9a\_ d2aabl1 d1tzia1 d4n1ca\_ d1k6qh1 d3g9ab\_ d4tvsa1  
d1lignh\_ d1pz5b1 d3dx9a1 d3wxwh\_ d1nakh1 d1kcul1 d3eaka\_ d4qlra1  
d1cr911 d1d9ka\_ d1f4x11 d1deea1 d2i27n2 d1c12a1 d2orb11 d1j8hd1  
d1mcp11 d1c5da1 d1kenh1 d1bd2e1 d1h5ba\_ d4x7fc1 d3upaa\_ d1t3fa1  
d1indh1 d2dtgc1 d4hc111 d1zv5a1 d4wgvb\_ d1uwgl1 d4f37k1 d1laqkh1  
d1vesa\_ d3zkqd\_ d1fpt11 d1lo411 d1knob1 d3rrqa\_ d1ct8b1 d4orz\_ c\_  
d1mlbb1 d4hgkc1 d1dqdl1 d1bogb1 d4ozhe1 d1dr9a1 d1i7za1 d1dn0b1  
d1kell1 d1rzib1 d1ypzf1 d1wtla\_ d1hkfa\_ d1fail1 d1figh1 d2vyre\_  
d1sjva\_ d1ohqa\_ d1bfoa1 d1pkqb1 d1mjul1 d1b4j11 d1nsn11 d2arjb1  
d1p4bh\_ d4aj0a\_ d3nn8b\_ d2rcja1 d1f2xk\_ d4v1dd\_ d1adqh1 d2eksa\_  
d4k3ga\_ d1jfqh1 d1uweh1 d1frgh1 d4gftb\_ d1uz8b1 d4nlea\_ d1bm311

d1clo1l d3mcka1 d2vq1a1 d1ae6h1 d4aq1b1 d1uj3b1 d1nbqa1 d1fh5l1  
d2ck0l1 d2ywza\_ d1q72l1 d4nxbx\_ d1hila1 d4hzl1b1 d2j88l1 d1zmya1  
d1cd0a\_ d1a4ka1 d1pskl1 d1a0qh1 d4krmb\_ d1ncbh1 d2fbjh1 d1j8he1  
d1i3ua\_ d1cf8l1 d1fe8h1 d2p1ya1 d1eeqa\_ d2x89a\_ d1o10a\_ d2r0lh1  
d1ub5a1 d1dfbh1 d3eyvb1 d4jdvb1 d4p2cg\_ d2gsia1 d2agjl1 d1u3ha1  
d2h1ph1 d1rihl1 d1fskc1 d1boga1 d2a77l1 d1osp1l d1qfoa\_ d3dwta\_  
d2fx7l1 d1rz7l1 d3stba1 d1pkqa1 d1b6da1 d1dzba2 d1dzba1 d1kj2a\_  
d4l1ha\_ d1rzgb1 d1dqlh\_ d12e8l1 d1mie1l d1jmaa\_ d1sbs1l d1fgnh1  
d1f58l1 d1mqkh\_ d1ndgb1 d3qeg1l d1iail1 d2aw2a1 d1tqbc1 d3fo2a1  
d4dkaa\_ d1f8th1 d2g60l1 d2ywya\_ d1uj3a1 d1yc7a\_ d3bd3a\_ d4w6xb1  
d1nmb1\_ d1i8ka\_ d1rjlb1 d1ypze1 d1p7kb1 d1kxqe\_ d1gpoh1 d2z4qa1  
d1w72h1 d1i9r1l d4qgya1 d4xt1c\_ d2qqnh1 d1cica1 d3c08h1 d2cd0a\_  
d2bdnh1 d1hnga1 d1mam1l d1nldh1 d1cr9h1 d4lcih1 d3bkyh1 d3qg7l1  
d1ai1l1 d1kxvc\_ d4iosd\_ d1l7ih1 d2x1qa\_ d1ub6b1 d3k74b\_ d1ibgh1  
d1teth1 d1igya1 d1hxma1 d2x6ma\_ d2e7la\_ d5e03a\_ d1qfwm\_ d2r0kh1  
d1igjb1 d1rurh1 d1plgh1 d1mj8h1 d1yuhb1 d3fmg1l d1rzfl1 d1emtl1  
d1ad9b1 d1igtb1 d1n1bl1 d1d5ih1 d3k7ua\_ d4ffyh\_ d1bwwa\_ d3dvga1  
d1a6ta1 d1fgvl\_ d4qxgl1 d1mim1l d1jhl1\_ d2hffb1 d2hh0l1 d1qkzh1  
d1l7tl1 d1afvh1 d1iaii1 d2cjuh\_ d1um5h1 d2ghwb2 d2ghwb1 d1kgce1  
d2fgwh1 d1ikfh1 d1dvfd\_ d2i24n1 d2xtjb\_ d1za3b1 d2yc1a\_ d2hh0h1  
d2x1oa\_ d1bvka\_ d1rjla1 d5e7ba1 d1igta1 d1il1b1 d2fb4l1 d1mvua\_  
d1jpt1l d32c2a1 d1fvca\_ d1iqdb1 d2hrph1 d2p4ab\_ d4qo1a\_ d1p2cb1  
d1wt5c\_ d1t4ka1 d5c1mb\_ d1it9l1 d1bz7a1 d1b2wh1 d1e4wl1 d1jnl1l  
d1za6b1 d3u7aa\_ d1igfh1 d3gnml1 d1orsa1 d1wejl1 d1a2ya\_ d1hxmb1  
d1gafh1 d2j4wh1 d1pz5a1 d1j05a\_ d1a3rh1 d4fq1l1 d1qfwh\_ d1eo8h1  
d1n7mh1 d4s11a\_ d1kegh1 d5da4a\_ d1iqwl1 d3whxb1 d1vgeh1 d1deeb1  
d1c12b1 d1t2ql1 d1ad9a1 d3gsnb1 d3b2uc1 d1ggbh1 d1t3fb1 d1nak1l  
d4ocmc\_ d1lila1 d2v7hb3 d2esve1 d1mcoh1 d2qr0b1 d2q3aa\_ d1ct8a1  
d1kcr1l d2pxyb\_ d2uzih\_ d5c3ld\_ d3durb\_ d1c5cl1 d2ak4e1 d1dl7h\_  
d1xiwd\_ d1mlba1 d1rmfl1 d1i7zb1 d1dlfl\_ d2xa3a\_ d5bq7b1 d1dqqb1  
d3h42l1 d1egjh1 d1kcv1l d1fe8l1 d2j6el1 d1f3rb2 d1l1k3l1 d1sm3h1  
d1q0xh1 d1ghfh1 d7fab1l d1igch1 d1l00h1 d4idla\_ d5c2b1\_ d1jrh1l  
d1i1la1 d3zhda1 d4kfcz\_ d1b0wa\_ d1e6oh1 d1mex1l d4krpb\_ d1fnsh1  
d1ncwh1 d4hgma\_ d4eigb1 d4rzca\_ d2mpal1 d4y5xa\_ d5en2b1 d3lrga1  
d4ej1c1 d1rhha1 d1j05b\_ d1forh1 d1q9wb1 d2wzpd\_ d2aq2a1 d1h0da1  
d3revb1 d2ij0c1 d1tzha1 d4m7jl1 d1k6ql1 d3b9kc1 d1igml\_ d3qeua1  
d1dsfl\_ d1celh1 d1kcu1l d1zvha1 d1zvoa1 d1tqbb1 d1ay1l1 d2qsc1l  
d2cgrh1 d1n10h1 d1ken1l d3eo0a1 d4n9ob1 d1n0xl1 d3k1kc\_ d1d4ua2  
d2aq2b1 d1ck1a1 d1lenfa1 d1i4pa1 d1v1oa1 d1et9a1 d1esfa1 d2g9hd1  
d4ohja1 d1klud1 d1bxta1 d1eu3a1 d1ty0a1 d1fnua1 d2cqva1 d1fhga\_  
d2k1ma\_ d2d12a1 d1biha3 d1biha1 d1biha4 d3qp3a1 d1glca\_ d1gxea\_  
d1cvsc2 d1cvsc1 d1xmwa2 d1m4ka2 d2otpa2 d1biha2 d1rhfa2 d2fcba2  
d2fcba1 d1gsma2 d1lepfa1 d1lepfa2 d2dava1 d1waaa\_ d1f97a2 d1x44a1  
d1vcaa2 d1fnla2 d1fnla1 d3b5ha2 d3h8na2 d3h8na1 d1jbja1 d1jbja2

d1pd6a\_ d1f2qa2 d1f2qa1 d3cx2a\_ d1nbqa2 d3b5ha1 d1n26a1 d1xiwb\_  
d1xaua\_ d1fltx\_ d2ifga1 d1olla1 d1olla2 d1cs6a4 d1cs6a3 d1cs6a2  
d1cs6a1 d2gw5a2 d1sy6a1 d1xiwa\_ d1lucta2 d1lucta1 d1ry7b2 d1gl4b\_  
d1qz1a3 d1olza1 d2c9aa1 d1wwca\_

**Family-35 (b.47.1.3)**

**Positive dataset contains 5 protein sequences.**

d3su6a1 d4agka\_ d1q31a\_ d3e90b\_ d3u1jb\_

**Negative dataset contains 4000 protein sequences.**

d1m32a\_ d1libja\_ d1c7na\_ d1liuga\_ d4q75a\_ d2bkwa1 d1t3ia\_ d1n8pa\_  
d1qz9a\_ d1jff9a\_ d1p3wa\_ d3kgwa\_ d1c11a\_ d2ctza1 d1vjoa\_ d2rfva\_  
d1gc0a\_ d1cs1a\_ d1d2fa\_ d2ch1a1 d1qgna\_ d1pffa\_ d1elua\_ d1ax4a\_  
d1c7ga\_ d2v1pa1 d2ez1a\_ d1jx4a2 d3gv5b1 d1t94a2 d3bq0a2 d3i2ka1  
d1lnsa3 d1mpxa2 d1xkta1 d2hfka\_ d5d3ka\_ d2cfba1 d1dfoa\_ d1o69a\_  
d1bj4a\_ d3k28a\_ d2bwpa\_ d3lg0a\_ d2fnua\_ d3ou5a\_ d1z7da1 d1b9ha\_  
d1iaya\_ d4msoa\_ d1bs0a\_ d1s0aa\_ d1sffa\_ d3tqxa\_ d1mdoa\_ d3qboa\_  
d3pgya\_ d1bjna\_ d2dkja\_ d1ejia\_ d1vefa1 d4wxga\_ d3bs8a\_ d3gbxa1  
d1w23a\_ d1g8fa3 d1ddla\_ d1e57b\_ d1auyb\_ d1qnia1 d1fwxa1 d2wo3b\_  
d1shxa\_ d1f56a\_ d1bypa\_ d1azca\_ d1ws8a\_ d3u25a\_ d1cuoa\_ d1id2a\_  
d1rkra\_ d2iaac\_ d4dp1x\_ d1nwpa\_ d2gima\_ d2i7sa\_ d1qhqa\_ d3ehbb1  
d1fftb1 d1gyca3 d1hfua2 d1kbva1 d1kbva2 d1sdda1 d1sdda2 d1gyca1  
d1gyca2 d1mzya1 d2bw4a1 d1aoza1 d1aoza3 d1aoza2 d1kyaa2 d1kyaa3  
d1kyaa1 d1mzya2 d4e9sa1 d1sddb1 d1sddb2 d1hfua1 d1hfua3 d1oe1a2  
d1oe1a1 d1v10a2 d1v10a3 d1v10a1 d1novc\_ d2bbvc\_ d1a3qa1 d1iknc\_  
d3brda1 d1oy3c\_ d1imhc1 d1gjia1 d1zk9a1 d2cxka1 d2h0va\_ d1mqta\_  
d1d4m3\_ d1fmd3\_ d2mev1\_ g1aym.1 d1ev13\_ d4q4w1\_ d1r1a3\_ d2x5ia\_  
d1rhi1\_ g1r1a.1 g1d4m.1 g1rhi.1 d1b35b\_ d1loopa\_ d1tme1\_ d4iv1a\_  
g1pvc.1 g1fpn.1 d1fpn1\_ d4gb31\_ d1d4m1\_ d1fmd1\_ d2wzr3\_ g1cov.1  
d1qqp3\_ g1fmd.1 d2x5ic\_ d1rhi3\_ g1oop.1 d1hxs1\_ g1hxs.1 d1fpn3\_  
d1bev1\_ g2mev.1 d1eah3\_ d1aym1\_ d1pvc3\_ d1qqp1\_ d1zba3\_ d1h8ta\_  
d3vbhc\_ g1b35.1 g1bev.1 d1hxs3\_ g1ev1.1 d1bev3\_ g1tmf.1 d1tmf1\_  
d1b35a\_ d2mev3\_ g1eah.1 g1h8t.1 d1eah1\_ d4q4w3\_ d1r1a1\_ d1aym3\_  
d1pvc1\_ d1zba1\_ d1h8tc\_ d1oopc\_ d1tme3\_ g1qqp.1 d4iv1c\_ g1tme.1  
d1nepa\_ d1ktja\_ d1ds6b\_ d1fstb\_ d1lum8a\_ d1ixza\_ d1qvra3 d1qzma\_  
d1sxjc2 d1jr3d2 d2p65a\_ d1l8qa2 d1g8pa\_ d3hu3a3 d1sxjd2 d1njfa\_  
d1in4a2 d1sxja2 d1tuea1 d2ce7a2 d1w5sa2 d1sxjb2 d1d2na\_ d1ny5a2  
d1ofha\_ d2gnoa2 d2a5yb3 d1fnna2 d1u0ja1 d1lv7a\_ d1iqpa2 d2fnaa2  
d1ixsb2 d4gita\_ d1sxje2 d1g41a\_ d1tafa\_ d1bh9b\_ d1tafb\_ d1jfib\_  
d1q9ca\_ d1h3ob\_ d2byka1 d1n1ja\_ d4g92b\_ d1jfia\_ d1h3oa\_ d2bykb1  
d1n1jb\_ d1pd212 d1nhya2 d2a2ra2 d1k0dd2 d1f2ea2 d1gsua2 d1f3ba2  
d2fhea2 d2pvqa1 d1tw9a2 d1oyja2 d1e6ba2 d1k0ma2 d3ik7a1 d4is0a1  
d1r5aa2 d1jlva2 d1m0ua2 d3gtub2 d1z9ha2 d1okta2 d1axda2 d2gsra2  
d1tu7a2 d1k3ya2 d1zgma1 d1b48a2 d1gnwa2 d1gwca2 d2gsta2 d1glqa2  
d1oe8a2 d1pn9a2 d1v2aa2 d1fw1a2 d1duga2 d1ydwa2 d2nvw2 d1h6da2  
d1zh8a2 d1qkia2 d1xeaa2 d1tlta2 d1r0ka3 d1vkoa2 d1vm6a2 d3qvs2

d1gr0a2 d1p1ja2 d4aw8a\_ d3gpdg2 d2q49a2 d1hdgo2 d2g17a2 d2cvoa2  
d2czca1 d3pwka2 d1obfo2 d1i32a2 d1zyao2 d2pkqo2 d1b7go2 d2hjsa2  
d1cf2o2 d1vkna2 d1nvmb2 d1ux8a\_ d1dlya\_ d4i0va\_ d2bkma\_ d1dlwa\_  
d2bmma\_ d2msya\_ d2djoa1 d2r5za\_ d1au7a1 d1f43a\_ d2lmda1 d1akhb\_  
d1s7ea1 d3nara\_ d1zq3p1 d2craa1 d1mija\_ d4uuta\_ d3a01a\_ d1x58a1  
d3rkqa1 d3cmya1 d2cqxa1 d2da6a1 d1e3oc1 d1fjla\_ d1mh3a1 d1ig7a\_  
d1x41a1 d1wh7a1 d1gt0c1 d2mw8a\_ d1x2ma1 d1b72a\_ d1wi3a1 d1jgga\_  
d1wjha1 d1x2na1 d1mnmc\_ d2cuea1 d3k2aa\_ d2hosa\_ d2jwta2 d1pufa\_  
d1octc1 d2hi3a\_ d1b8ia\_ d4j19a\_ d3lnqa\_ d1wh5a1 d1b8ib\_ d1tc3c\_  
d1gdtal d1u78a2 d1hlva1 d1iufa2 d1iufa1 d1igna1 d2iu5a1 d1zk8a1  
d2g7sa1 d2fd5a1 d2np5a1 d1z0xa1 d2id6a1 d2d6ya1 d2i10a1 d1vi0a1  
d2oi8a1 d3c07a1 d2ns7a1 d2fq4a1 d2yvea1 d1t33a1 d2o7ta1 d2np3b1  
d2g7ga1 d2gena1 d2fbqa1 d2g71a1 d2gfna1 d2g3ba1 d2jj7a1 d2hyja1  
d1sgma1 d1ui5a1 d2hkua1 d2id3a1 d4jyka1 d3lv8a\_ d1s3ga1 d1zaka1  
d1s4qa\_ d3tvta2 d1uf9a\_ d1khta\_ d1ckea\_ d1osna\_ d1p5zb\_ d4tmka\_  
d3cm0a\_ d1tmka\_ d1jaga\_ d3h86a\_ d1t0hb\_ d1nn5a\_ d2h92a\_ d3kb2a1  
d2c95a1 d1yj5a2 d1kgda\_ d1ly1a\_ d1vyva2 d1deka\_ d2grja1 d1p3ja1  
d1y63a\_ d1e4ya1 d1s96a\_ d3iija1 d1lvga\_ d1nksa\_ d1vyua2 d4e22a\_  
d1qf9a\_ d1jjva\_ d1q3ta\_ d1ki9a\_ d1lw7a2 d1teva\_ d1kja2 d1gsia\_  
d2iyva2 d1kaga\_ d1viaa\_ d1g3ma\_ d1j99a\_ d1t8ta1 d1nsta\_ d1fmja\_  
d1zrha\_ d2a3ra\_ d1aqua\_ d2zptx\_ d3ckla\_ d1texa\_ d1q44a\_ d2gwha\_  
d1z0ja1 d3umra2 d3gj0a1 d2gaoa1 d1yzga1 d1x3sa1 d1g7sa4 d1puja\_  
d1udxa2 d1kk1a3 d2o52a\_ d1jwyb\_ d1zcaa2 d1zcba2 d2fv8a1 d2cjwa\_  
d3dz8a1 d1xzpa2 d1vg8a\_ d4qxaa\_ d2ew1a1 d1x1ra1 d2bcgy\_ d3doea1  
d3cona\_ d3rega\_ d3wyga\_ d1upta\_ d2b6ha1 d1zd9a1 d1lnza2 d1r5ba3  
d1n0ua2 d1r2qa\_ d2f91a1 d2rhda\_ d3q3jb\_ d3q85a\_ d1efma1 d1r8qa\_  
d2gf9a1 d2akab1 d1ek0a\_ d1z08a1 d2gcoa1 d2dyla2 d4g01b\_ d2cxxa1  
d1svia\_ d3q72a\_ d1ni3a1 d4ac9a4 d2erxa1 d2bmea\_ d1wxqa1 d2gf0a1  
d4ldja1 d1zunb3 d1d5ca\_ d4lv5b\_ d1efca3 d1kmqa\_ d2g6ba1 d3lrpa\_  
d1tada2 d2y8ea\_ d4rd4a1 d1z06a1 d2heia\_ d3a58b\_ d1u01a2 d1d2ea3  
d1zj6a1 d2ocba\_ d3rwoa\_ d1mr3f\_ d2e9sa1 d4u5xa1 d2iwra\_ d2fn4a1  
d3bwdd\_ d2nzja1 d2atva1 d2ksqa\_ d3l43a\_ d1mkya2 d1mkya1 d1wmsa\_  
d1jnya3 d2rmka\_ d1f6ba\_ d1f60a3 d1gota2 d1jala1 d2fh5b1 d1g16a\_  
d2wblc\_ d1m7ba\_ d1wf3a1 d1f5na2 d1t9ha2 d1z6xa1 d1z0aa1 d2fg5a1  
d2a5ja1 d2bcjq2 d1s0ua3 d1ky3a\_ d4y0va\_ d4lhwa\_ d2qmea1 d2atxa1  
d1legaa1 d1ryha\_ d1moza\_ d1nrjb\_ d2erya1 d3bfka\_ d1puia\_ d1fzqa\_  
d3j3az1 d3t5ga\_ d1shza2 d3defa\_ d2f7sa1 d3raba\_ d3tsoa\_ d3aq4a\_  
d2a17a1 d3sfva1 d3bc1a\_ d2ncda\_ d1sdma\_ d3h4sa1 d2heha\_ d2grya\_  
g3kin.1 d1kk8a2 d1br2a2 d1goja\_ d1f9va\_ d2mysa2 d1lkxa\_ d3t0qa\_  
d4db1a1 d3gbja\_ d1ry6a\_ d1v8ka\_ d2ovga\_ d1sq8a\_ d1rzsa\_ d3kz3a\_  
d3orca\_ d1y4wa1 d1g99a2 d2e1za2 d2e1za1 d1saza1 d1saza2 d1ig8a1  
d1czan2 d1czan1 d1ig8a2 d1czan4 d1bg3a4 d1bg3a3 d1bg3a2 d1bg3a1  
d1nira1 d1qksa1 d1hroa\_ d4gedb\_ d3zooa\_ d1mz4a\_ d1gu2a\_ d1f1fa\_  
d1dvva\_ d1c6ra\_ d1c75a\_ d1e29a\_ d1gdva\_ d1cnoa\_ d1h32b\_ d1co6a\_



d2bh4x\_ d2aiua\_ d5cytr\_ dljdl\_ dli8oa\_ d2zboa\_ d3dmia\_ d1ls9a\_  
d1wvec\_ d2yk3a\_ d3ph2b\_ dlw0a\_ d5aura\_ dlql3a\_ dlqn2a\_ dlflca\_  
d2nqya\_ dlh4ga\_ d1oa2a\_ d1olra\_ d3b7ma\_ d4h7ma1 d3wp3a\_ d2vgda\_  
dligoa\_ d3zsea\_ d2nlra\_ d3wx5a\_ d1oa3a\_ d1pvxa\_ d1m4wa\_ d1f5ja\_  
d1oa4a\_ d1ks5a\_ d4ixla1 d1evsa\_ d1cnt1\_ d1pvhb\_ dlz7ca\_ dlhuwa\_  
d1bgea\_ d1rhga\_ d1f6fa\_ d1f45b\_ d1i1rb\_ d1axia\_ dletea\_ d3tgxb\_  
d2z3qa1 d3qb1a\_ dlhula\_ d1m48a\_ d4nkqb\_ dleera\_ dlv7mv\_ d5e4ea\_  
d2o27a\_ d3b5ka\_ d2psma1 d4zf7a\_ d3uf5a\_ d4x51a\_ d1d9ca\_ d4ypgc1  
d3oq3a\_ d1lqsl\_ d1n1fa\_ d1aula\_ d1wu3i\_ d3bes1\_ d3ux9a\_ d4dnxa2  
d1m8pa2 d1g8fa2 d1jhda2 d1x6va2 d3rbaa\_ d2qtra\_ d1nupa\_ d3l92a\_  
d1f9aa\_ d1qjca\_ d2h29a\_ d1vlha\_ d1lod6a\_ d1lw7a1 d1mrza2 d4ruka\_  
d2e17a\_ d1liq0a2 d1irxa2 d1ivsa4 d2cyba\_ d1rqga2 d1j09a2 d2yxna\_  
d1f7ua2 d1h3fa1 d1ffya3 d2g36a1 d1nzja\_ d1jila\_ d1n3la\_ d1i6la\_  
d1pfva2 d1h3na3 d3n9ia\_ d3sz3a1 d3sw2a\_ d1moxc\_ d1dx5i3 d1edmb\_  
d1aut12 d1aut11 d1nqlb\_ d1dval1 d1szba2 d1kigl\_ d2y5fl\_ d1ijqa2  
d1gk5a\_ d1g1sa2 d1nt0a3 d1xdtr\_ d1lmja2 d1lmja1 d1nzia2 d2wphe\_  
d1klil\_ d1pfxl2 d1pfxl1 d1p9ja\_ d1g1ta2 d1f7ea\_ d4yzub\_ d2mgpa1  
d1b9wa1 d1b9wa2 d2mgpa2 d1oblcl d1oblcl2 d1n1ia2 d1n1ia1 d2npra2  
d2npra1 d2y5ia\_ d1qlsa\_ d1psra\_ d3n22a\_ d2egda\_ d4ggfc\_ d2wcea\_  
d2luca\_ d4aqia\_ d3nsia\_ d2lp3a\_ d1j55a\_ d1a4pa\_ d1k8ua\_ d1nsha\_  
d1pvaa\_ d3fs7a\_ d2pvba\_ d1ttxa\_ d1rwya\_ d2kyfa\_ d1rk9a\_ d1a75a\_  
d1exra\_ d1tiza1 d1nyaa\_ d1g8ia\_ d1ggwa\_ d1wdcc\_ d3fwba\_ d1ggza\_  
d2o5ga\_ d1ctaa\_ d3i5gc\_ d1sl8a\_ d1fpwa\_ d2scpa\_ d2roaa\_ d4aqra\_  
d3pn7b\_ d1br1b\_ d2mysb\_ d1s6ca\_ d1bjfa\_ d2obha\_ d1jfka\_ d1jf0a\_  
d1qv0a\_ d1lkja\_ d2mlfc\_ d2m97a\_ d2d8na\_ d4by5a\_ d1jbaa\_ d4nqga\_  
d1wdcb\_ d2mysc\_ d1j7qa\_ d1s6ia\_ d1uhka2 d1r2ua\_ d1dtla\_ d3kf9a\_  
d3pn7c\_ d5d67d\_ d1tuza\_ d1h8ba\_ d1leg3a1 d2zkmx1 d1snla\_ d1jfxa\_  
d1wkya2 d1uuqa\_ d3wh9a\_ d4m1ra\_ d1xyza\_ d4xuya\_ d2je8a5 d4bf7a1  
d3cuia\_ d1ur4a\_ d1qw9a2 d1odza\_ d2vzsa5 d1bqca\_ d2x2ya1 d1hjqa\_  
d1qnra\_ d4y7ea1 d1vjza\_ d4k68a\_ d2v3ga\_ d4hpga\_ d1nofa2 d1nq6a\_  
d1h4pa\_ d1aq0a\_ d3ziza\_ d4bs0a\_ d1ecea\_ d1h1na\_ d1ta3b\_ d1w91a2  
d1ilwa\_ d1uhva2 d1us3a2 d1legza\_ d7a3ha\_ d1tvna1 d3nyda1 d1ghsa\_  
d2cyga1 d4xv0a\_ d2c8na2 d1w32a\_ d3emca\_ d1v6ya1 d1foba\_ d2uwfa1  
d2fgla\_ d3niya1 d2c0ha1 d1rh9a1 d1yq2a5 d1szna2 d1fa2a\_ d1pama4  
d5do8a1 d1ea9c3 d1hx0a2 d2fhfa5 d1qhoa4 d1avaa2 d1m53a2 d4m8ua1  
d2gjpa2 d1lwha2 d4howa1 d1ktba2 d1j0ha3 d3vm5a1 d2x1ia\_ d1wzaa2  
d1uasa2 d2diea1 d1mxga2 d1ht6a2 d1eswa\_ d1iv8a2 d5cpsa\_ d1ud2a2  
d1zjaa1 d3gbea1 d1kwga2 d1wdpa\_ d1gcya2 d1g5aa2 d1hvxa2 d3dhpa2  
d2bhua3 d4do4a1 d3qgva1 d1e43a2 d1g94a2 d2d3na2 d1gjwa2 d1gvia3  
d1x1na1 d1r7aa2 d1tz7a1 g1apy.1 d3ljqa\_ d4toqa\_ d1wb0a1 d1w9pa1  
d1litxa1 d1kfwal d1goia2 d1edqa2 d2gsja\_ d1hjxa1 d1jnda1 d1vf8a1  
d3wdpp1 d3wq5a\_ d1gnxa\_ d4gxpa\_ d4hz8a\_ d1e4mm\_ d3aiua\_ d1wcga1  
d3ahxa\_ d1v02a\_ d2dgaa\_ d1pbga\_ d1vffa1 d1qoxa\_ d4ha4a\_ d1mixa2  
d1e5wa2 d1j19a2 d1isna2 d2al6b2 d3syxa1 d1mkea1 d2p8va\_ d1xoda1

d1i7aa\_ d1evha\_ d1qc6a\_ d1legxa\_ d1liuka\_ d2csua1 d3q9ub\_ d2yv1a1  
d3q9na\_ d2d59a\_ d1oi7a1 d2yv2a1 d1leuca1 d1y81a1 d3nvva1 d1krha3  
d2h88b1 d1n62a2 d1t3qa2 d1kf6b2 d1zoyb1 d1jq4a\_ d1ffva2 d1rm6c2  
d9ldta1 d2ewda3 d1up7a1 d2dfda1 d1s6ya1 d1vjta1 d7mdha1 d1hyea1  
d1t2da1 d1oj3a3 d1b8pa1 d1ldna1 d1hyha1 d1civa1 d2a92a1 d1ez4a1  
d1i0za1 d1y6ja1 d1gv0a1 d1ur5a1 d1ll1da1 d1obba1 d1v8ba1 d1gdha1  
d1l7da1 d2dlda1 d1mx3a1 d1ygya1 d1qp8a1 d1li4a1 d1j4aa1 d2naca1  
d1npya1 d3t4ea2 d1a4ia1 d1o0sa1 d2hk9a2 d2egga2 d1b26a1 d1bvua1  
d1gq2a1 d1clda1 d1leha1 d1gtma1 d1euza1 d1nvtal d3dona2 d1ledza1  
d1gpja2 d1vi2a1 d1p77a1 d1b0aa1 d1vl6a1 d1v9la1 d1etob\_ d1umqa\_  
d1kola2 d1f8fa2 d1qora2 d1jqba2 d1vj0a2 d1cdoa2 d1gu7a2 d1d1ta2  
d1xa0a2 d2dm6a2 d1jvba2 d1rjwa2 d1llua2 d1h2ba2 d1tt7a2 d1piwa2  
d1o89a2 d1liz0a2 d1e3ja2 d1yb5a2 d1uufa2 d1e3ia2 d3gpdg1 d1vc2a1  
d2nvwa1 d1u8fo1 d1ydwal d1hdgo1 d2g17a1 d1cf2o1 d2czca2 d1r0ka2  
d1obfo1 d2cvoa1 d1ebfa1 d1h6da1 d1i32a1 d1zh8a1 d2q49a1 d1qkia1  
d1j5pa4 d3pzra1 d1xeea1 d1vkoa1 d1vm6a3 d3qvsa1 d2pkqo1 d1b7go1  
d1gr0a1 d1p1ja1 d1lc0a1 d1j0xo1 d3pwka1 d2hjsa1 d1zyao1 d1vkna1  
d1tlta1 d1nvmb1 d3sjua\_ d3ojfa1 d1xu9a1 d2jjya1 d1n7ha\_ d1y1pa1  
d1h5qa\_ d1jtv\_ d4fs3a\_ d2bkaa1 d1gy8a\_ d2c5aa1 d1ulsa\_ d1ooea\_  
d2b69a1 d1y5ma1 d1spxa\_ d1aela\_ d1bxka\_ d1ydea1 d1gega\_ d1hdoa\_  
d1o5ia\_ d1e6ua\_ d1snya1 d2rhca\_ d3zv4a\_ d5ceja\_ d2d1ya1 d1fjha\_  
d3w8ea\_ d2fmua1 d1x1ta\_ d1rpna\_ d3ay7a1 d1k2wa\_ d1eq2a\_ d2hrba1  
d3ruaa\_ d2ew8a1 d4hwka\_ d1xgka\_ d2bd0a1 d1yo6a1 d2a35a1 d2ntva\_  
d1vl8a\_ d1hdca\_ d4bkua\_ d2ag5a1 d2q45a\_ d1nffa\_ d4iy1a\_ d1zbqa1  
d1kewa\_ d1ek6a\_ d1ja9a\_ d2q46a2 d1iy8a\_ d1cyda\_ d2ptga\_ d1hxha\_  
d1uzma1 d3lyla\_ d4m89a\_ d3weya\_ d2blla1 d1w6ua\_ d1sb8a\_ d2q2va\_  
d4nr0a\_ d1e6wa\_ d2gasa\_ d3oiga1 d2bgka1 d1mxha\_ d1vl0a1 d1rkxa\_  
d1r6da\_ d1wmaa1 d1e7wa\_ d2c07a1 d1xkqa\_ d3tzha\_ d1g0oa\_ d3lz6a\_  
d1qyca\_ d1ledoa\_ d1gz6a\_ d1loc2a\_ d1t2aa\_ d1zema1 d2xoxa\_ d1z45a2  
d1geea\_ d1p33a\_ d3lt0a\_ d4e6pa\_ d2wyua\_ d1db3a\_ d4q9na\_ d1xhla\_  
d4o1ma\_ d1fmca\_ d2uvda\_ d2gdza1 d1uaya\_ d2z1ma\_ d2o23a2 d2fr1a2  
d2fr1a1 d1qsga\_ d1qyda\_ d4zjua\_ d2a4ka1 d1yb1a\_ d1wvga1 d1yxma1  
d3f4ba\_ d1mg5a\_ d1xg5a1 d1r55a1 d3gboa\_ d1atla\_ d1buda\_ d4q1la\_  
d1quaa\_ d1yp1a\_ d1wnia\_ g1y43.1 d4ekfa\_ d2ckga\_ d1th0a\_ d2bkra\_  
d1cmxa\_ d1xd3a\_ d3ifwa\_ d1g0da4 d2f4ma1 d1x3za\_ d3ulra1 d1g9ka2  
d1kapp2 d1t3ca\_ d1epwa3 d2a97a\_ d3fiea\_ g1e1h.1 d3ioqa\_ d1fh0a\_  
d1o0ea\_ d1khqa\_ d1m6da\_ d2cb5a\_ d1cs8a\_ g8pch.1 d1s4va\_ d2pnsa\_  
d1vsna1 d1mira\_ d2oula\_ d7pcka\_ d3bwka\_ d3bcna\_ d2p86a\_ d1pvja\_  
d1pcia\_ d1gece\_ d1deua\_ d4bs6a\_ d1xkga1 d1cqda\_ d1jqpa2 d2c0ya\_  
d2bdza\_ d3p5ua\_ d2o36a\_ d1zoya1 d1qo8a2 d1d4ca2 d1chua2 d1jnra2  
d1kf6a2 d2jk6a2 d2jk6a1 d1feca1 d1feca2 d1lpfa1 d1xhca1 d1xhca2  
d1dxla2 d1dxla1 d1gera2 d1m6ia2 d1onfa1 d1onfa2 d3lada2 d3lada1  
d1w4xa1 d1w4xa2 d1gesa2 d1mo9a1 d1xdia1 d1fl2a2 d1fl2a1 d1fcda1  
d1fcda2 d1h6va2 d1h6va1 d1mo9a2 d1gv4a2 d1gv4a1 d2gv8a2 d2gv8a1

d1aoga1 d1aoga2 d1hyua1 d1ebda1 d1ebda2 d3dk9a1 d1qlra2 d1qlra1  
d1gesa1 d1zbfal d2z1ha\_ d2etja1 d3qioa1 d1jlla\_ d2e4la\_ d1jl2a\_  
d2lsna1 d1io2a\_ d1uaxa\_ d2yv0x\_ d1mu2a1 d1ekea\_ d1i39a\_ d1pn0a1  
d1reoal d1ju2a1 d2f5va1 d3c96a1 d2gmha1 d1pj5a2 d1gpea1 d1o5wa1  
d1n4wa1 d1k0ia1 d2dw4a2 d2ivda1 d1seza1 d2voua1 d1s5ja1 d2hbja2  
d2igia\_ d1wlja\_ d1qhta1 d4dlea1 d1tgoa1 d2f96a1 d3tr8a1 d3mxma\_  
d1q8ia1 d1y97a1 d1w0ha\_ d1kfsa1 d2py5a1 d1noya\_ d1d5aa1 d1yt3a3  
d2guia\_ d3mwpal d4kb1a\_ d2d5ra1 d1offa\_ d1frra\_ d3wcqa\_ d1e9ma\_  
d1l5pa\_ d1wria\_ d1i7ha\_ d3av8a\_ d1czpa\_ d1rfka\_ d3p1ma1 d3b2ga\_  
d2bt6a2 d1jmx4 d1jmx3 d1pbya3 d1k8ka2 d1k8ka1 d3uleb1 d3i33a2  
d3i33a1 d1bupa1 d1dkgd2 d1dkgd1 d4ci6a2 d1jcfa1 d4a2ba2 d2fxua1  
d1yaga2 d1yaga1 d4cbua2 d1bupa2 d1r7ha\_ d1faaa\_ d1wika1 d1xfla\_  
d1ttza1 d2f51a1 d1ti3a\_ d1nhoa\_ d1sena\_ d2i4aa\_ d1ep7a\_ d1zmaa1  
d1fo5a\_ d3lefa1 d3diea1 d2yana1 d1z6na1 d1oaza\_ d3zywa1 d4aj8a\_  
d1nm3a1 d4fiwa\_ d1wmja\_ d4hs1a1 d1iloa\_ d1xwaa1 d1wjka1 d2vm1a\_  
d1fb6a\_ d1gh2a\_ d1h75a\_ d1nw2a\_ d3a6na\_ d4m6ba2 d2nqbd\_ d3wkjd\_  
d2yfwe\_ d4h9na\_ d5bnxa\_ d1kx5c\_ d3r45a\_ d1eqzb\_ d4jjnb\_ d1f66c\_  
d1eqza\_ d4wnnb\_ d1kx5a\_ d1u35c1 d1lid3a\_ d2nqbc\_ d1kx5d\_ d3us3a3  
d3us3a1 d2b5ea2 d2b5ea3 d2b5ea1 d2b5ea4 d2kp1a1 d2kp2a1 d1hyua3  
d1hyua4 d1j08a1 d1j08a2 d4mh8a\_ d1mu2a2 d4i7ga1 d1ovna2 d1iqca2  
d1iqca1 d1eb7a2 d1eb7a1 d1nmla2 d3h3no1 d3h3no2 d3ezwa2 d4ilya\_  
d1chka\_ d4olta\_ d1txga2 d3f47a1 d1mv8a2 d2pv7a2 d1xc2a3 d2ahra2  
d4xiya1 d2f1ka2 d1pgja2 d1i36a2 d1np3a2 d1lj8a4 d1teaa3 d1qmg2  
d2i76a2 d2g5ca2 d1wdka3 d3cuma3 d1qqya\_ d1gd6a\_ d1f6ra\_ d2gv0a\_  
d1iiza\_ d2z2fa\_ d1j8xa\_ d1ghla\_ d1b9oa\_ d174la\_ d169la\_ d2o4wa\_  
d1p37a\_ d1k28a3 d1xjta1 d1jtma\_ d2f2qa\_ d4e97a1 d1g4ma1 d1g4ma2  
d4qgna\_ d1vr3a1 d2za0a\_ d2c21a1 d1f9za\_ d1mpya2 d1kw3b2 d1kw3b1  
d4ghga1 d1tfza1 d3isqa1 d3isqa2 d1sqia1 d1sqia2 d1lkda2 d1lkda1  
d1mpya1 d1cjxa2 d1cjxa1 d1sp9b2 d1t47a1 d1t47a2 d1f1ua2 d1sp8a1  
d1sp8a2 d1f1ua1 d2bema\_ d1pama1 d1lea9c1 d1qhoa1 d2fhfa2 d2fhfa1  
d1k3ia1 d1j0ha1 d1cxl1a1 d2bhua1 d1ledqa1 d1f1sa2 d1ut9a2 d1gvia1  
d1txka1 d1s5ja2 d1qhta2 d4dlea2 d1tgoa2 d3py8a2 d1q8ia2 d1kfsa2  
d2py5a2 d1d5aa2 d1qsta\_ d2beia1 d4m3sa\_ d1u6ma1 d1ygha\_ d1yk3a1  
d3dr6a\_ d1xmta\_ d1z4ea1 d2ge3a1 d1bo4a\_ d2fiaa1 d2jdca1 d1y9wa1  
d3to7a\_ d1wwza1 d2fl4a1 d2ozua1 d2b5ga\_ d2cy2a1 d2p0wa\_ d1cm0a\_  
d4pswa\_ d1yrea1 d1yr0a1 d1m4ia\_ d2gana1 d1yvka1 d1ghea\_ d2g3aa1  
d1y7ra1 d2euia1 d1q2ya\_ d2fsra1 d1xeba\_ d2ae6a1 d1cjwa\_ d1qsma\_  
d2aj6a1 d1y9ka1 d1i12a\_ d1vkca\_ d2atra1 d1n71a\_ d2d4pa1 d2fiwa1  
d2fe7a1 d1tiqa1 d2ou2a\_ d1yx0a1 d2fcka1 d1p0ha\_ d2j8ma\_ d2pq8a\_  
d1z4ra1 d1s3za1 d1ufha\_ d1xvqa1 d1pn0a2 d3hy2a\_ d2cvba1 d1o8xa\_  
d1lu4a\_ d1we0a1 d2bmx1a1 d2a4va1 d1psqa\_ d1xiya1 d1q98a\_ d1n8ja\_  
d1zofa1 d2ggta\_ d3tjja\_ d4je1a1 d1o73a\_ d3s9fa\_ d2zcta\_ d1jfua\_  
d2b1ka\_ d5dvba1 d2b5xa1 d2v2ga\_ d1st9a\_ d3tb2a\_ d4llra\_ d4fh8a1  
d1e2ya\_ d1knga\_ d2h30a\_ d1i5ga\_ d2z9sa\_ d2f8aa1 d1tp9a1 d2b7ka\_

d1nm3a2 d3hvva\_ d2wfca1 d4kcea\_ d1xvwa1 d4gqca1 d3qpma\_ d4k1fa\_  
d1zzoa1 d1gp1a\_ d1prxa\_ d2qked\_ d4ksoa\_ d1t4za1 d1wwja\_ d3kasa1  
d3b11a3 d2ph1a2 d2ph1a1 d1fxza2 d1fxza1 d1lrha\_ d1uija1 g1dgw.1  
d2v09a\_ d1uika2 d1uika1 d1dgwa\_ d1e88a1 d116ja5 d116ja4 d1eaka4  
d1eaka3 d116ja3 d1h8pa1 d1etha2 d1w52x1 d2pp1a1 d1hpla2 d1lpbb2  
d2oxea1 d1bu8a2 d1rp1a2 d1ys1x\_ d4hs9a\_ d1ispa\_ d1ku0a\_ d3qmma\_  
d1bn1a\_ d2h11a1 d2r8ba1 d3b5ea1 d3cn9a\_ d1lgya\_ d413wa\_ d111fa\_  
d1gz7a\_ d1lukca\_ d4wfia\_ d4cg1a1 d3visa\_ d3groa\_ d1thta\_ d1ei9a\_  
d1ra6a\_ d1muka\_ d3gsza\_ d1khva\_ d1te9a\_ d2xwha\_ d3uqsa\_ d3hkwa\_  
d3n6ma\_ d2cjqa\_ d2xyma\_ d1teba\_ d1te8a\_ d1u09a1 d4wfxa\_ d3tyqa\_  
d2pgga1 d3zxha\_ d1cg1a\_ d1rm8a\_ d1eaka2 d1hy7a\_ d2jsda\_ d1cxva\_  
d1hv5a\_ d1g12a\_ d3p0ya1 d1igra1 d1igra2 d1n8yc2 d1m6ba2 d1m6ba1  
d4dv8a2 d1m41a\_ d2bk7a\_ d3fjua\_ d1z5ra1 d1kwma1 d1jqga1 d2c1ca1  
d1dtda\_ d1h81a2 d2tbvc\_ d1c8nc\_ d1x36a\_ d1smvc\_ d1ng0c\_ d4sbvc\_  
d1lopa\_ d1f2nc\_ d1cixa\_ d1y29a\_ d1v7fa\_ d2jtba\_ d1d1ha\_ d1g9pa\_  
d1lupa\_ d1qk7a\_ d1mb6a\_ d2a2va\_ d1niya\_ d1i25a\_ d1hvwa\_ d2mpqa\_  
d1ie6a\_ d1kqha\_ d11a4a\_ d2mxoa1 d1koza\_ d1qk6a\_ d1emxa\_ d11qra\_  
d1c6wa\_ d1js9c\_ d1f15b\_ d1za7a\_ d11aja\_ d1rypd\_ d1irua\_ d1rypc\_  
d3unfk\_ d1rypa\_ d1j2pa\_ d1irui\_ d1j2qh\_ d3unfh\_ d1m4ya\_ d1rypb\_  
d1irul\_ d1irug\_ d1iru2\_ d1q5rh\_ d1rypg\_ d1g3ka\_ d1iruf\_ d1q5qa\_  
d1e94a\_ d1irub\_ d1ryph\_ d3ty6a\_ d1iruj\_ d1iruk\_ d1rype\_ d1irud\_  
d1irue\_ d3mi01\_ d1rypf\_ d1iruh\_ d2z3ba\_ d1iruc\_ d3mka2\_ d1irul\_  
d1ny721 d1ny722 d1a6ca3 d1a6ca2 d1a6ca1 d1pgl22 d1pgl11 d1ny711  
d1jgta2 d1ofda3 d1ea0a3 d1ecfa2 d1q15a2 d1ct9a2 d1te5a\_ d1y14b1  
d2nn6i1 d1i941\_ d2zjra2 d1smxa\_ d2qamc2 d1hh2p1 d2r7da1 d1rl2a2  
d1wfaq1 d3bzka4 d1x6oa2 d3a0ja\_ d2j01d2 d2ja9a1 d4q15a\_ d1hr0w\_  
d1luza\_ d2n3sa\_ d2vnud1 d1h95a\_ d1go3e1 d2nn6h1 d1ne3a\_ d2mo1a\_  
d1iz6a2 d1jjga\_ d1e3pa2 d2ix0a3 d2ix0a2 d21xja\_ d1ueba3 d1ueba2  
d2z0sa1 d1u01a1 d2ix0a1 d2eifa2 d2je6i1 d3i2za1 d2c35b1 d2ahob2  
d1t9ha1 d3i4oa\_ d2qa111 d1jt8a\_ d2nn6g1 d1g6pa\_ d3cama\_ d1i94q\_  
d1c9oa\_ d1d7qa\_ d2ba0a1 d2vnud2 d2vnud3 d1khia2 d2qalq1 d1wi5a1  
d1xtda2 d4w9ta\_ d4x2ra1 d1ka9f\_ d1qo2a\_ d4axka1 d1thfd\_ d1h5ya\_  
d4u28a\_ d2y88a\_ d4wd0a\_ d1vzwa1 d41t9a1 d3tc7a1 d3hoja\_ d1i4na\_  
d3vnda\_ d3n18a1 d1geqa\_ d3nav1 d4a2ra1 d3tc6a1 d1ujpa\_ d4ijba\_  
d1xcfa\_ d1vc4a\_ d1rd5a\_ d1qopa\_ d3b5va\_ d2r80b\_ d1cqxa1 d1cg5a\_  
d1gcvb\_ d3boma\_ d2h8fb\_ d2raoa\_ d3bj1a\_ d4hrrb\_ d2r50a\_ d3d1kb\_  
d2aa1b1 d3zhwa\_ d3hf4b\_ d3gdja\_ d1jebb\_ d3bj1b\_ d1x9fb\_ d1wmub\_  
d1gcva\_ d3bcqb\_ d3d4xb\_ d1gvha1 d2dc3a\_ d3hf4a\_ d4yu3a\_ d3k8ba\_  
d1qpwb\_ d2r80a\_ d3bcqa\_ d1v4wa\_ d3wtgb\_ d1j17a\_ d4esaa\_ d1a9we\_  
d3d1ab\_ d1fsla\_ d4h21a\_ d1v4wb\_ d1mwca\_ d1vhba\_ d1jeba\_ d1spgb\_  
d1h97a\_ d1q1fa\_ d1tu9a1 d3d1aa\_ d1hdsb\_ d3hyub\_ d2zfb\_ d3fs4a\_  
d1oj6a\_ d1shrb\_ d4h21b\_ d4yu3b\_ d1spga\_ d3hrwa\_ d3qqra\_ d3at5a\_  
d4wchd\_ d3hyua\_ d1cg5b\_ d1uc3a\_ d1hbra\_ d2raob\_ d1outb\_ d4esab\_  
d3gdjb\_ d3qqqa\_ d1x9fc\_ d3vrfa\_ d1litha\_ d3mkba\_ d3d4xa\_ d3mjpa\_

d1jl6a\_ d3fh9a\_ dlouta\_ d2dc3b\_ dlit2a\_ d3eoka\_ d3g46a\_ d1qpwa\_  
d3vrfb\_ dlch4a\_ dlx9fd\_ dlhdsa\_ d2zfa\_ d3mkbb\_ dlora4a\_ d3wtga\_  
d1a4fa\_ d3fh9b\_ d3bomb\_ d3cy5a\_ d3at5b\_ dlx9fa\_ d2oifa\_ d4lmbx\_  
d1cpcb\_ d3v57a\_ dlkn1a\_ d1cpca\_ d4f0ta\_ d2vjha\_ d4po5b\_ d1eyxa\_  
d1alla\_ d4f0tb\_ dlb8db\_ d4h0mb\_ dlb33a\_ d2vjhb\_ d4lm6b\_ d2vmlb\_  
d1allb\_ d2vjta\_ d3dbja\_ d2vmla\_ d2vjtb\_ d4f0ub\_ dl1f99b\_ d4rmpa1  
d1liaa\_ d1eyxb\_ d2uulb\_ d4lmsb\_ d4f0ua\_ d2bv8a\_ dl1f99a\_ d2bv8b\_  
d2c7lb\_ d3dbjb\_ d4rmpb1 dlb8da\_ d4h0ma\_ d3v57b\_ dlkn1b\_ d1liab\_  
d2uula\_ d2j96a\_ d3w3ea\_ d4tx7a\_ d3cqla\_ d4msta\_ d3iwra\_ d2z37a\_  
d4dyga\_ d2xqfa\_ d1ea5a\_ dl1f6wa\_ dl1dx4a\_ dl1qe3a\_ dl1k4ya\_ d4qwwa\_  
d2ha2a\_ dl1sfra\_ dl1f0na\_ d4qeka\_ d3c8da2 d2pbla1 dl1jkma\_ dl1jjia\_  
d1lzl1a\_ dl1jjfa\_ d4iuaa3 d4bvva\_ d5hpga\_ d3k65a\_ dl1ki0a3 dl1ki0a2  
dl1ki0a1 dl1a0ha1 dl1pmla\_ d3sp8a3 d2feba1 dl1mdwa\_ dl1ziva1 dl1zcm1  
dl1f74a\_ d3l21a\_ d2e1da\_ dl1to3a1 dl1w3ia\_ dl1sfla\_ dl1n7ka\_ dl1vcva1  
d4imea\_ dl1wa3a\_ d2ocza1 dl1f2ja\_ d3m16a\_ d2yxga\_ dl1ub3a\_ d3a5fa\_  
dl1fbaa\_ dl1l6wa\_ dl1xfba1 dl1wx0a1 dl1vpxa1 dl1ojxa\_ dl1mxsa\_ d2a4aa1  
dl1xkya1 d3cq0a1 d3s1xa\_ dl1f05a\_ dl1fdja\_ d3cpra1 d4d2ja\_ dl1cg2a1  
dl1yloa2 dl1y7ea2 dl1y0ya3 dl1lfwa1 dl1vixa1 dl1fnoa4 dl1vhoo2 dl1ysja1  
dl1vhea2 dl1z21a1 d2fvga2 dl1vgya1 dl1r3na1 d2grea2 dl1xmba1 gl1q71.1  
d2ftba\_ dl1pmpa\_ d2rcqa1 dl1fdqa\_ d4l1kpa\_ dl1sa8a\_ dl1vyfa\_ dl1lpja\_  
d3vg7a1 d4azqa1 dl1o8va\_ d5bvqa\_ dl1p6pa\_ d2qo4a\_ dl1opba\_ dl1yiva1  
dl1o1va\_ d4bvma1 d4tkba\_ d4i3ba\_ dl1bwya\_ dl1ftpa\_ dl1ggla\_ d4gkca\_  
d3p6da1 dl1kqwa\_ d2a0aa1 dl1dzka\_ d4t1ja\_ d2a2ua\_ d4wfvva\_ d3t1da\_  
d4iaxa\_ d3zq3a\_ d2nnda\_ dl1i4ua\_ dl1kxoa\_ dl1bbpa\_ dl1kt7a\_ dl1exsa\_  
d3s26a1 dl1lf7a\_ dl1qfta\_ d4gh7a\_ dl1z24a1 dl1qabe\_ dl1xkia\_ d3bx7a\_  
d4iaawa1 dl1n0sa\_ dl1gkab\_ d3kzaa\_ d2k23a\_ d2l9ca1 d2joza1 dl1gm6a\_  
d3kffa\_ d3saoa1 dl1e5pa\_ dl1yupa1 dl1iiua\_ dl1e69a\_ dl1mv5a\_ d3g60a4  
gl1ii8.1 dl1ewqa2 dl1qhla\_ dl1v43a3 d2wmfa1 dl1vpla\_ dl1g2912 d4a82a2  
gl1f2t.1 d2d62a1 d3tuic1 d2bbsa1 d3g60a3 d2ixea\_ dl1g6ha\_ dl1sgwa1  
d2qi9c\_ d3rlfa1 d3b60a1 d3d31a2 d2pzea1 gl1xew.1 dl1jj7a\_ dl1oxk2  
d2onka1 dl1wlwa\_ dl1iwea\_ dl1qf5a\_ dl1vmaa2 dl1nija1 dl1np6a\_ d2p67a1  
d3ihla\_ dl1okkd2 dl1lsla2 dl1slma2 dl1iona\_ d2v40a\_ dl1dj3a\_ d3hida\_  
d2vo1a1 d2g0ta1 dl1vcoa2 dl1j8mf2 dl1g3qa\_ dl1xjca\_ dl1qzxa3 dl1ihua2  
dl1ihua1 d2qm8a\_ dl1dj2a\_ d4ioja\_ dl1cp2a\_ dl1yrba2 dl1hyqa\_ d3gqba2  
dl1skye3 dl1xp8a1 dl1tf7a2 dl1tf7a1 dl1ye8a1 dl1skyb3 d2qe7d2 d4blta\_  
d4huta\_ d3l1daa2 d4hyya\_ d2i3ba1 dl1crla\_ d3j9tb2 d3ntua2 dl1vdza1  
d2z43a\_ dl1e9ra\_ dl1nlfa\_ d3ziaa2 dl1n0wa\_ dl1g6oa\_ d3ziad2 d3j9ta2  
dl1pzna2 d3gqbb2 d2i49a\_ dl1nnfa\_ dl1xvxa\_ dl1ursa\_ dl1h3da1 dl1iuda\_  
d4mlva1 dl1twya\_ d3e13x\_ d2nxoa1 d4pfua\_ d3ttma\_ dl1elja\_ d2qmw1  
dl1us5a\_ dl1y3na1 dl1jeta\_ dl1uqwa\_ d4f19a1 d2esna2 d3thia\_ d3fasa1  
d2uyeb\_ d2xwva1 dl1r9la\_ d2fyia1 dl1pb7a\_ d2ozza1 dl1sw5a\_ dl1nh8a1  
dl1vr5a1 d2g29a\_ dl1xs5a\_ d3lswa\_ d2z23a\_ d3w9va\_ d3tcha\_ dl1q35a\_  
dl1z7me1 d3q27a\_ dl1p99a\_ dl1ve4a1 d2i6ea1 d4mcoa1 d4n8ya\_ dl1eu8a\_  
dl1zba1 dl1hs1a\_ dl1ixca2 dl1jl1na\_ dl1xvya\_ dl1y9ua\_ d2z22a1 dl1xoca1

d4oera\_ d1wdna\_ d5f1qa1 d1xt8a1 d1i6aa\_ d4gwoa\_ d4igta1 d1pc3a\_  
d4mmpa1 d1o63a\_ d2cz1a1 d2onsa2 d4mija1 d4ok5a1 d2bmfa1 d2bmfa2  
d1yksa1 d1yksa2 d1jr6a\_ d2qeqa1 d2jlqa1 d1a1va2 d1eh3a\_ d3skpa\_  
d1dtza1 d1dtza2 d1jnf2a1 d1ce2a1 d1jnf1a1 d1b1xa2 d1b1xa1 d1jw1a1  
d1jw1a2 d1ryoa\_ d1h76a1 d1h76a2 d1c4oa1 d2p6ra3 d2p6ra4 d1oywa2  
d1wrba1 d1w36b2 d1w36b1 d1c4oa2 d3bora\_ d1t6na\_ d2eyqa5 d2eyqa3  
d2eyqa2 d2zu6a2 d1veca\_ d1uaaa1 d1w36d1 d2g9na1 d1z3ix2 d2rb4a\_  
d1hv8a1 d1hv8a2 d1t5ia\_ d1w36c2 d2j0sa2 d2j0sa1 d1fuka\_ d3hjha1  
d1z5za1 d1qdea\_ d1z63a1 d1s2ma2 d1s2ma1 d1wp9a1 d1wp9a2 d1gm5a3  
d1gm5a4 d3dina4 d3dina3 d1q0ua\_ d1w36c1 d1z3ix1 d1nkta3 d1nkta4  
d1uaaa2 d1w36d2 g1qhh.1 d2fwra2 d2fwra1 d3q3ma\_ d1za0a1 d1mxra\_  
d2inca\_ d2incb\_ d1mhyb\_ d3hf1b\_ d1mtyb\_ d1r2fa\_ d2uw1a\_ d1mhyd\_  
d3n37a\_ d1afra\_ d1oquc\_ d1syya\_ d1mtyd\_ d2o1za\_ d1uzra\_ d1smsa\_  
d2fkza\_ d1zujal d1s3qa1 d2fjca1 d1z6om1 d1veia\_ d4dyya\_ d1jiga\_  
d3gvya\_ d2pyba\_ d4cy9a1 d3bvfa1 d1r03a\_ d2cf7a\_ d1nf4a\_ d1zs3a1  
d4iwka\_ d3ka8a\_ d3np0x\_ d1n1qa\_ d1lb3a\_ d4e6ka\_ d1z6oa1 d2fzfa1  
d4dyua\_ d3ge4a\_ d1jgca\_ d4am4a\_ d2z6ma\_ d1ji5a\_ d1vlga\_ d1lkoa1  
d1krqa\_ d3qz3a\_ d1o9ra\_ d2ffxj\_ d1euma\_ d1yv1a1 d2v2pa\_ d1j30a\_  
d4di0a\_ d1dpsa\_ d1oewa\_ d2qzxa\_ d2asia\_ d1psoe\_ d1miga\_ d1smra\_  
d2h6ta\_ d1pfza\_ d1izda\_ d3hd8a\_ d1j71a\_ d1dpja\_ d4aa9a\_ d1t6ex\_  
g1b5f.1 g1lya.1 g1htr.1 d1qdma2 d1bxoa\_ d1wkra\_ d1tzsa\_ d1libqa\_  
d2qzwa\_ d1ex4a2 d1c6va\_ d2v76a\_ d1wj1a1 d1aqca\_ d1qqga2 d1qqga1  
d1ntva\_ d1n3ha\_ d4dbba\_ d3f0wa1 d1p3ra\_ d1wgua1 d2cy4a1 d3hqca\_  
d1wvha1 d1xr0b1 d1bdqa\_ d3ggta\_ d3ixoa\_ d1mrxa\_ d2haha\_ d1tw7a\_  
d4njsa\_ d1sgua\_ d2p3da\_ d1nsoa\_ d3d3ta\_ d2rkfa\_ d1c6ya\_ d2rspa\_  
d3ogpa\_ d3ekwa\_ d2o4na\_ d2j9ja\_ d1baia\_ d3ggua\_ d3lzua\_ d4npua\_  
d4j55a\_ d2r8na\_ d2fxda\_ d2p3ca\_ d4dqa\_ d3ttpa\_ d3t3ca\_ d2p3aa\_  
d2hc0a\_ d2fdda\_ d3mwsa\_ d1sr9a2 d1rqba2 d1wgda1 d1wgga1 d4q5eb\_  
d1wjna1 d1se9a\_ d3n3kb\_ d1wz0a1 d1we6a1 d2m0xa\_ d2gbka\_ d3rt3b1  
d1wh3a1 d1sifa\_ d2ekek2 d4ii2b1 d4hk2a1 d1m94a\_ d1wgha1 d1ttna1  
d1j8ca\_ d1wx8a1 d3v6cb1 d2ma9b\_ d4i61b1 d1bt0a\_ d2jvca1 d1iyfa\_  
d2k1fa\_ d1wxva1 d1wf9a1 d1t0ya\_ d2io0b2 d1x1ma1 d2gbma\_ d1zw7a1  
d2m17a\_ d1ud7a\_ d1we7a1 d2lwp\_ d2gbja\_ d1wjua1 d1v6ea1 d1v86a1  
d4eewa\_ d1w1aa1 d4icva\_ d4gu2a\_ d1wx7a1 d1wy8a1 d4hjka1 d2faza1  
d1v5oa1 d3ubra\_ d1qo8a1 d1d4ca1 d2k3va\_ d1ft5a\_ d1qdba\_ d1m1qa\_  
d2j7aa\_ d1h21a\_ d1ogyb\_ d4fasa\_ d1jnia\_ d1oaha\_ d1sp3a\_ d1wgga1  
d1v89a1 d2coda1 d1zc3b\_ d1wg7a1 d1u5ea1 d1v61a1 d2coca1 d2ys1a1  
d1v5pa1 d1ntya2 d1wjma1 d1wi1a1 d1u29a\_ d1xx0a1 d1unqa\_ d2zkmx3  
d1fhoa\_ d1v88a1 d2adza1 d1x1fa1 d1p6sa\_ d2coaa1 d1btka\_ d1v5ma1  
d1faoa\_ d2x18a\_ d1dyna\_ d1x1ga1 d4kaxb\_ d2j59m1 d1ki1b2 d1xcga2  
d1txda2 d1u5da1 d1w1ha\_ d1upqa\_ d1v5ua1 d1foea2 d2fjla1 d1eaza\_  
d2dfka2 d2cofa1 d1kz7a2 d1g66a\_ d5ajha1 d1iyka2 d1rxta1 d1iica2  
d1iica1 d1wioa4 d1ccza2 d1vcaa1 d1dr9a2 d2d9qb1 d2nxyb2 d2dara2  
d2dara1 d1wyha2 d2dloa2 d1rutx4 d1rutx3 d2cuqa2 d1x41a2 d1x41a1

d1x3ha2 d1x3ha1 d2d8za1 d1x61a2 d1x6aa1 d1x6aa2 d2cora2 d2cora1  
d1v6ga1 d1v6ga2 d2d8za2 d1x64a1 d1x64a2 d1b8ta1 d2co8a1 d1x63a2  
d2dj7a2 d2dj7a1 d2cu8a2 d2cu8a1 d1g47a2 d1j2oa1 d1wyha1 d2dloa1  
d1wiga1 d1wiga2 d2cupa2 d2cupa3 d1x68a1 d2d8ya2 d2d8ya1 d1m3va2  
d1x62a1 d1x68a2 d1x61a1 d1b8ta3 d1b8ta2 d2d8xa2 d2d8xa1 d1x4ka1  
d1x4ka2 d2cuqa1 d1m3va1 d2co8a2 d1j2oa2 d1x63a1 d2cura1 d2cura2  
d1x62a2 d2e3fa\_ d2e3ea\_ d2l1lda\_ d2ny8x\_ d2e3ga\_ d2ny9x\_ d2nz3a\_  
d2l1j7a\_ d1n4na\_ d2m8bb1 d2kyqa\_ d3psma\_ d1jkza\_ d1jxca\_ d2g11a\_  
d1ugla\_ d4uj0a\_ d2k4ua\_ d1hp2a\_ d2lu9a\_ d1baha\_ d2meoa1 d1wm7a\_  
d1hlya\_ d1n8ma\_ d1j1za\_ d1wpda\_ d1c55a\_ d1pvza\_ d1wt7a\_ d1rjia\_  
d1wz5a\_ d1m2sa\_ d1pjva\_ d1c49a\_ d2ktca1 d1wmta\_ d1du9a\_ d1j5ja\_  
d1r1ga\_ d1t0za\_ d2i61a\_ d1t1ta\_ d1sn4a\_ d1kv0a\_ d2l1kba\_ d1npia\_  
d1wwna\_ d1pe4a\_ d2kbka\_ d2li7a\_ d1djta\_ d2kbha\_ d1dq7a\_ d1sega\_  
d1omya\_ d1zywa1 d1jzaa\_ d1n9wa1 d1bbua1 d1e1oa1 d1c0aa1 d1l0wa1  
d3a74a1 d1eova1 d1t61c1 d1iyjb4 d1iyjb5 d1iyjb3 d1o7ia\_ d4ipca1  
d1x3ea\_ d4apva\_ d1jb7a1 d1jb7a2 d1jb7a3 d3kdfa\_ d1ue1b\_ d1wjja1  
d3eiva\_ d1xjva2 d1xjva1 d2ccza2 d1se8a\_ d1l1loc\_ d1jb7b\_ d1qvca\_  
d3ulla\_ d1qzga\_ d1miua4 d1miua5 d1miua3 d3g48a1 d1gd7a\_ d1mkha\_  
d1jjcb3 d3ubub\_ d1legia\_ d1qo3c\_ d1v7pa\_ d1tdqb\_ d3ubua\_ d1c3ab\_  
d1h8ua\_ d3bx4b\_ d1t8ca1 d1sb2a1 d1qdda\_ d2ziba1 d3cada\_ d1byfa\_  
d1j34b\_ d1jwia\_ d1jzna\_ d1c3aa\_ d1wmza\_ d3bdwb\_ d1hq8a\_ d1fifa1  
d1dv8a\_ d3hupa\_ d1wk1a1 d1umra\_ d2afpa\_ d3bx4a\_ d1gz2a\_ d1sl6a\_  
d1v7pb\_ d3g8ka\_ d1ixxa\_ d1j34a\_ d1jwib\_ d1g1sa1 d1y17a1 d1ja3a\_  
d1fvub\_ d3bdwa\_ d1sb2b1 d1fvua\_ d1umrc\_ d1oz7a\_ d4m17a\_ d3cfwa1  
d1ypqa1 d1g1ta1 d3fd4a\_ d3l9jc\_ d4dn8a1 d1v41b\_ d1rdl1\_ d2msba\_  
d2a1ka\_ d1je5a\_ d1rpma\_ d2shpa1 d1yfoa\_ d1l8ka\_ d2ooqa1 d1g4us2  
d1p15a\_ d1lara2 d1lara1 d1wcha\_ d2fh7a2 d2fh7a1 d1ohea1 d1ohea2  
d2f4da\_ d1rxda\_ d2hxpa\_ d1xria\_ d1d5ra2 d1fpza\_ d3ezza\_ d4y2ea\_  
d1i9sa\_ d3azya\_ d3wvja\_ d1upsa1 d1ajoa\_ d2hyka\_ d1ajka\_ d2vy0a\_  
d1o4ya\_ d3o5sa\_ d3d6ea\_ d3atga\_ d1dypa\_ d1umza\_ d3i4ia\_ d1c11a\_  
d41bqa\_ d1a78a\_ d1slta\_ d4no4a\_ d3zsja\_ d3duia\_ d1g86a\_ d1qmja\_  
d1hlca\_ d1tdha3 d1q3ba3 d1ee8a3 d1k82a3 g1qmo.1 g1len.1 d3zyra\_  
d1n47a\_ g2ltn.1 d1avba\_ d3usua\_ d1dhkb\_ d1f9ka\_ d1lukga\_ d1g8wa\_  
d1g9fa\_ d1wbfa\_ d3wcsa\_ d1g7ya\_ g1loe.1 d1mvqa\_ d1hq1a\_ d1v6ia\_  
d1dbna\_ d1qnwa\_ d1fx5a\_ d4l8qa\_ d1ioaa\_ d3n35a\_ d3h33a\_ d1rwja\_  
d19hca\_ d1os6a\_ d3bxua\_ d3h4na\_ d1i77a\_ d3caoa\_ d1j0pa\_ d1duwa\_  
d1ofwa\_ d2e84a\_ d1hh5a\_ d1gyoa\_ d3h34a\_ d1a6ya\_ d3cbba\_ d1ynwa1  
d1r4ia\_ d1hcqa\_ d2hana\_ d2hanb\_ d2enva1 d1kb4b\_ d2n11b\_ d1l01a\_  
d1cita\_ d1adqa1 d1fnga1 d1uvqb1 d1zs8a1 d2vola1 d2vola2 d1mfb12  
d2jelh2 d1uwe12 d3qq4b1 d1k1vb\_ d1k5na1 d1osph2 d4odh12 d1ow0a1  
d1ow0a2 d1bfob2 d3l9ra2 d3jtth1 d2fath2 d4elkb2 d1fn4b2 d2xfxb\_  
d1pg7x2 d1cqka\_ d4k71b2 d1l1k2a1 d1eapb2 d4l1fhg2 d1i4fa1 d2nw2a2  
d1kfah2 d1mhca1 d1h3ua1 d1wejh2 d1h0db2 d1a5fh2 d1kevh2 d1mjuh2  
d1qqda1 d1kcrh2 d1k8ia1 d3huja2 d2nnab1 d1nfd2 d3mffb2 d1s9va1

d11k3h2 d1q0x12 d1fv1b1 d1neza1 d4rfeb2 d1r3ha1 d1a6tb2 d1kjva1  
d1pz5b2 d1onqa1 d2bc4a2 d1de4a1 d1k8da1 d1tcra2 d1dn0b2 d1nfde2  
d2xwtb2 d1bfoa2 d1mexh2 d1iakb1 d1ypzf2 d4f7ea2 d1q72l2 d2fbjh2  
d1fe8h2 d1clzh2 d1fngb1 d1uvqa1 d1vgka1 d1c16a1 d4j12a2 d4x99b2  
d1igtb3 d1je6a1 d1q72h2 d1nldh2 d1teth2 d2hmic2 d1i1ca2 d1i1ca1  
d1k8ib1 d1q0yh2 d1kfa12 d3frua1 d1pg7w2 d1u58a1 d1igyb4 d1igyb3  
d1hyrc1 d1klub1 d1deeb2 d1c12b2 d2bc4b2 d2ig2h2 d1kcvl2 d3wn5b1  
d11k2b\_ d11k3l2 d1mjul2 d1sm3h2 d1q0xh2 d1zvsa1 d1ydpa1 d1u8ib2  
d1ypze2 d1kcu2 d1op9a\_ d1y0la1 d1letzb1 d1egj11 d2gsib1 d1nj9a1  
d4jfh1 d1aqk11 d1t2ja\_ d1l04h1 d1zvya1 d3v4v11 d4enec1 d1kxtb\_  
d5e8ea1 d2pxya\_ d4weud\_ d1xiwc\_ d2esvd1 d1qznh\_ d1logae1 d1f4xh1  
d4n1hb\_ d3ezjb1 d3mlw11 d1kfah1 d1etza1 d1b4jh1 d3cfic\_ d4w68a\_  
d2arja1 d1ek3a\_ d2ok0l1 d1vera\_ d1uwgh1 d1blnb1 d1fpth1 d1rzga1  
d2giya1 d4m3kb1 d1nc2a1 d2nyyd1 d1ncna\_ d1fbih1 d5dxwa\_ d4fqqa1  
d1dqdh1 d1jfq11 d1kelh1 d1faih1 d1frgl1 d1figl1 d4m6n11 d1fo0a\_  
d4hxb11 d3b5ga\_ d3quyd1 d2h9gb1 d1i8kb\_ d2dd8h1 d2ck0h1 d1eaja\_  
d4w6wb1 d2a6ib3 d1t66d1 d2e27h\_ d1ob1b1 d1f11b1 d2v7na1 d1ad0a1  
d2xt1b1 d1pskh1 d4i13b1 d2op4l1 d1a0ql1 d1uwel1 d1za3a1 d1ncb11  
d4uu9a\_ d1bm3h1 d1cloh1 d1nqba2 d1cf8h1 d4y5va\_ d1mhph1 d5anma1  
d4cdgc1 d4ldeb\_ d1y0lb1 d2pcpb1 d1z3gl1 d1dfb11 d1fh5h1 d3g5xa1  
d1tzib1 d4dn3l1 d3zhka1 d2b1hh1 d2uyl1 d1f3dh1 d1nj9b1 d2agjh1  
d2h1pl1 d1q72h1 d8fabb1 d1ndmb1 d1rjca1 d4u6hb1 d3upca\_ d2fbj11  
d1osph1 d1tvda\_ d2cjev\_ d4fhd1 d1bd2d1 d1rz7h1 d3nn8a\_ d1blna1  
d1knoa1 d1nfda1 d2bmkb1 d1dq11\_ d1igyb1 d1igf11 d12e8h1 d3utza1  
d1nc2b1 d1rihh1 d4mwfb1 d4jvpa1 d1mieh1 d1rhfa1 d1fgn11 d1sbsh1  
d1lp9e1 d1dn0a1 d4lqf11 d1iaih1 d1kgcd1 d1mh5b1 d1gpol1 d2g60h3  
d1f8t11 d2jixd1 d4grwh\_ d1fo0b\_ d1bfob1 d1axsa1 d1u9ka\_ d1nmbh\_  
d1h8na1 d1h8na2 d1jguh1 d4eura1 d3sdy11 d35c8h1 d1w72l1 d1mvub\_  
d1i9rh1 d1ob1a1 d4wenb\_ d1yeeh1 d3ietc1 d1f58h1 d1ad0b1 d1mqk1\_  
d1nbvh1 d4b50a\_ d3r8bb\_ d1baf11 d1mamh1 d4rgne1 d2gsgb\_ d35c8l1  
d1bafh1 d1ai1h1 d2pcpa1 d2fath1 d2x1pa\_ d1orsb1 d1libgl1 d1shma\_  
d1a2yb\_ d1u0qa\_ d2coqa\_ d1hilb1 d1qfwi\_ d1jv5b\_ d1fn4b1 d5e0qa\_  
d1nsnh1 d1plgl1 d4ocx11 d1kb5h1 d1rzhf1 d1pg7x1 d2fx7h1 d2oi9c\_  
d117i11 d3eyva1 d1d5i11 d4ffyl\_ d1tet11 d1a6wh\_ d1ac6a\_ d3dvfa\_  
d1nfde1 d1mimh1 d1ri8a1 d1jhlh\_ d3dura\_ d1fskb1 d1f97a1 d3so3b1  
d2ak4d1 d1lp9f1 d4z7wf1 d117th1 d4y5ya\_ d4x7ec1 d1emth1 d1ikf11  
d1nlbh1 d4utal1 d1bjma1 d1eapb1 d1u6ah1 d2dtgd1 d1kj2b\_ d1xeda1  
d1cleh1 d1fgvh\_ d2bnub1 d2fb4h1 d2dtgb1 d1ktrh\_ d1jpth1 d1qkz11  
d4hepg\_ d2atpb1 d1flrh1 d2hrpl1 d1mvfa\_ d1iaim1 d3k80a1 d2jb5h1  
d3zkxc\_ d4grwe\_ d1it9h1 d1rhhb1 d3w9ec\_ d1e4wh1 d1sy6h1 d2j6eh1  
d3qxta\_ d1jglh1 d1p7ka1 d1tzhb1 d4n8pa1 d1gaf11 d2jelh1 d1wioa2  
d4i0cc1 d1cicb1 d1lmka2 d1lmka1 d1iqwh1 d1orqb1 d1ejoh1 d1jnlh1  
d4zgl1a\_ d43c9b\_ d1ggbl1 d1wejh1 d3q6fa1 d1f3dj1 d3c6la1 d1bqlh1  
d3p9wb\_ d1a3r11 d1h0db1 d2uzil\_ d1eo8l1 d1qfwl\_ d1n7ml1 d1igja1



d1c5ch1 d2a9mh\_ d1rmfh1 d1fj1b1 d4heme\_ d1ccza1 d1a5fh1 d1ogad1  
d1dlfh\_ d1qa9b\_ d1vgel1 d3qskb\_ d1sjxa\_ d4ozfg1 d1sq2n\_ d1qd0a\_  
d1kcvh1 d1c5db1 d3qcull1 d3bn9d1 d1mjuh1 d4y8dc\_ d7fabh1 d3dvgb1  
d11o0l1 d1a6tb1 d1gigh1 d1kcrh1 d2hwz11 d1yjdc1 d3clfl1 d4krna\_  
d1dl7l\_ d1e6ol1 d1mexh1 d3r0ma\_ d4kkna\_ d1fns11 d1loaqh\_ d1rzia1  
d1ucbh1 d1ncw11 d4b41a\_ d1nfdfl1 d2mpah1 d2d7t11 d4grwf\_ d4b5ea\_  
d11k3h1 d3u79a\_ d4u3xa\_ d1ghfl1 d1bvkb\_ d1mcww1 d1b88a\_ d1jrhh1  
d32c2b1 d4wemb\_ d1dsfh\_ d1op3h1 d1ce111 d1iqda1 d1qoka1 d1qoka2  
d1qfuh1 d2crya1 d1ay1h1 d1loaql\_ d3ab0b\_ d1rur11 d1t4kb1 d1bz7b1  
d1n0xh1 d1for11 d1ucbl1 d4w6yb\_ d43c9a\_ d2aab11 d1tzia1 d4n1ca\_  
d1k6qh1 d3g9ab\_ d4tvsa1 d1lghm\_ d1pz5b1 d3dx9a1 d3wxwh\_ d1nakh1  
d1kcull1 d3eaka\_ d4qlra1 d1cr9l1 d1d9ka\_ d1f4xl1 d1deea1 d2i27n2  
d1c12a1 d2orbl1 d1j8hd1 d1mcph1 d1c5da1 d1kenh1 d1bd2e1 d1h5ba\_  
d4x7fc1 d3upaa\_ d1t3fa1 d1indh1 d2dtgc1 d4hc111 d1zv5a1 d4wgvb\_  
d1uwg11 d4f37k1 d1aqkh1 d1vesa\_ d3zkqd\_ d1fpt11 d11o4l1 d1knob1  
d3rrqa\_ d1ct8b1 d4orz\_ d1mlbb1 d4hgkc1 d1dqd11 d1bogb1 d4ozhe1  
d1dr9a1 d1i7za1 d1dn0b1 d1kell1 d1rzi11 d1ypzf1 d1wtla\_ d1hkfa\_  
d1fail1 d1figh1 d2vyre\_ d1sjva\_ d1ohqa\_ d1bfoa1 d1pkqb1 d1mjul1  
d1b4jl1 d1nsl1 d2arjb1 d1p4bh\_ d4aj0a\_ d3nn8b\_ d2rcja1 d1f2xk\_  
d4v1dd\_ d1adqh1 d2eksa\_ d4k3ga\_ d1jfqh1 d1uweh1 d1frgh1 d4gftb\_  
d1uz8b1 d4n1lea\_ d1bm3l1 d1clol1 d3mcka1 d2vq1a1 d1ae6h1 d4aq1b1  
d1uj3b1 d1nbqa1 d1fh5l1 d2ck0l1 d2ywza\_ d1q72l1 d4nxbx\_ d1hila1  
d4hz1b1 d2j88l1 d1zmya1 d1cd0a\_ d1a4ka1 d1pskl1 d1a0qh1 d4krmb\_  
d1ncbh1 d2fbjh1 d1j8he1 d1i3ua\_ d1cf8l1 d1fe8h1 d2p1ya1 d1leeqa\_  
d2x89a\_ d1ol0a\_ d2r0lh1 d1ub5a1 d1dfbh1 d3eyvb1 d4jdvb1 d4p2cg\_  
d2gsia1 d2agjl1 d1u3ha1 d2h1ph1 d1rih11 d1fskc1 d1boga1 d2a77l1  
d1osp11 d1qfoa\_ d3dwta\_ d2fx7l1 d1rz7l1 d3stba1 d1pkqa1 d1b6da1  
d1dzba2 d1dzba1 d1kj2a\_ d4l1ha\_ d1rzb1 d1dqlh\_ d12e8l1 d1miel1  
d1jmaa\_ d1sbs11 d1fgnh1 d1f58l1 d1mqkh\_ d1ndgb1 d3qegl1 d1iail1  
d2aw2a1 d1tqbc1 d3fo2a1 d4dkaa\_ d1f8th1 d2g60l1 d2ywy\_ d1uj3a1  
d1yc7a\_ d3bd3a\_ d4w6xb1 d1nmb1\_ d1i8ka\_ d1rjlb1 d1ypze1 d1p7kb1  
d1kxqe\_ d1gpoh1 d2z4qa1 d1w72h1 d1i9rl1 d4qgya1 d4xt1c\_ d2qqnh1  
d1cica1 d3c08h1 d2cd0a\_ d2bdnh1 d1hnga1 d1mam11 d1nldh1 d1cr9h1  
d4lcih1 d3bkyh1 d3qg7l1 d1ai111 d1kxvc\_ d4iosd\_ d117ih1 d2x1qa\_  
d1ub6b1 d3k74b\_ d1libgh1 d1teth1 d1igya1 d1hxma1 d2x6ma\_ d2e71a\_  
d5e03a\_ d1qfwm\_ d2r0kh1 d1igjb1 d1rurh1 d1plgh1 d1mj8h1 d1yuhb1  
d3fmg11 d1rzfl1 d1emt11 d1ad9b1 d1igtb1 d1nlb11 d1d5ih1 d3k7ua\_  
d4ffyh\_ d1bwwa\_ d3dvga1 d1a6ta1 d1fgvl\_ d4qxgl1 d1mim11 d1jhl1\_  
d2hffb1 d2hh0l1 d1qkzh1 d117t11 d1afvh1 d1iaii1 d2cjuh\_ d1um5h1  
d2ghwb2 d2ghwb1 d1kgce1 d2fgwh1 d1ikfh1 d1dvfd\_ d2i24n1 d2xtjb\_  
d1za3b1 d2yc1a\_ d2hh0h1 d2x1oa\_ d1bvka\_ d1rjla1 d5e7ba1 d1igta1  
d1il1b1 d2fb4l1 d1mvua\_ d1jpt11 d32c2a1 d1fvca\_ d1iqdb1 d2hrph1  
d2p4ab\_ d4qo1a\_ d1p2cb1 d1wt5c\_ d1t4ka1 d5c1mb\_ d1it9l1 d1bz7a1  
d1b2wh1 d1e4wl1 d1jnl11 d1yedb1 d1za6b1 d3u7aa\_ d1igfh1 d3gnml1

d1orsa1 d1wejl1 d1a2ya\_ d1hxmb1 d1gafh1 d2j4wh1 d1pz5a1 d1j05a\_  
d1a3rh1 d4fqll1 d1qfwh\_ d1eo8h1 d1n7mh1 d4s11a\_ d1kegh1 d5da4a\_  
d1iqw11 d3whxb1 d1vgeh1 d1deeb1 d1c12b1 d1t2ql1 d1ad9a1 d3gsnb1  
d3b2uc1 d1ggbh1 d1t3fb1 d1nak11 d4ocmc\_ d1l1la1 d2v7hb3 d2esve1  
d1mcoh1 d2qr0b1 d2q3aa\_ d1ct8a1 d1kcr11 d2pxyb\_ d2uzih\_ d5c3ld\_  
d3durb\_ d1c5c11 d2ak4e1 d1d17h\_ d1xiwd\_ d1mlba1 d1rmfl1 d1i7zb1  
d1dlfl\_ d2xa3a\_ d5bq7b1 d1dqqb1 d3h4211 d1legjh1 d1kcv11 d1fe811  
d2j6e11 d1f3rb2 d11k311 d1sm3h1 d1q0xh1 d1ghfh1 d7fab11 d1igch1  
d11o0h1 d4idla\_ d5c2b1\_ d1jrh11 d1l11a1 d3zhda1 d4kfzc\_ d1b0wa\_  
d1e6oh1 d1mex11 d4krpb\_ d1fnsh1 d1ncwh1 d4hgma\_ d4eigb1 d4rzca\_  
d2mpa11 d4y5xa\_ d5en2b1 d3lrga1 d4ej1c1 d1rhha1 d1j05b\_ d1forh1  
d1q9wb1 d2wzpd\_ d2aq2a1 d1h0da1 d3revb1 d2ij0c1 d1tzha1 d4m7j11  
d1k6q11 d3b9kc1 d1igml\_ d3qeua1 d1dsfl\_ d1ce1h1 d1kcu11 d1zvha1  
d1zvoa1 d1tqbb1 d1ay111 d2qsc11 d2cgrh1 d1n10h1 d1ken11 d3eo0a1  
d4n9ob1 d1n0xl1 d3k1kc\_ d2m9wa1 d3dfxa\_ d2aq2b1 d1ck1a1 d1enf11  
d1i4pa1 d1v1oa1 d1et9a1 d1esfa1 d2g9hd1 d4ohja1 d1klud1 d1bxta1  
d1eu3a1 d1ty0a1 d2cqva1 d1fhga\_ d2k1ma\_ d2dl2a1 d1biha3 d1biha1  
d1biha4 d3qp3a1 d1g1ca\_ d1gxea\_ d1cvsc2 d1cvsc1 d1xmwa2 d1m4ka2  
d2otpa2 d1biha2 d1rhfa2 d2fcba2 d2fcba1 d1gsma2 d1epfa1 d1epfa2  
d2dava1 d1waaa\_ d1f97a2 d1x44a1 d1vcaa2 d1fnla2 d1fnla1 d3b5ha2  
d3h8na2 d3h8na1 d1jbj11 d1jbj2 d1pd6a\_ d1f2qa2 d1f2qa1 d3cx2a\_  
d1nbqa2 d3b5ha1 d1n26a1 d1xiwb\_ d1xaua\_ d1fltx\_ d2ifga1 d1olla1  
d1olla2 d1cs6a4 d1cs6a3 d1cs6a2 d1cs6a1 d2gw5a2 d1sy6a1 d1xiwa\_  
d1ucta2 d1ucta1 d1ry7b2 d1gl4b\_ d1qz1a3 d1olza1 d2c9aa1 d1wwca\_

**Family-36 (b.50.1.1)**

**Positive dataset contains 27 protein sequences.**

d3ggta\_ d3ixoa\_ d2haha\_ d1tw7a\_ d4njsa\_ d1sgua\_ d2p3da\_ d3d3ta\_  
d2rkfa\_ d3ogpa\_ d3ekwa\_ d2o4na\_ d2j9ja\_ d3ggua\_ d3lzua\_ d4npua\_  
d4j55a\_ d2r8na\_ d2fxda\_ d2p3ca\_ d4dqa\_ d3ttpa\_ d3t3ca\_ d2p3aa\_  
d2hc0a\_ d2fdda\_ d3mwsa\_

**Negative dataset contains 4035 protein sequences.**

d1m32a\_ d1libja\_ d1c7na\_ d1iuga\_ d4q75a\_ d2bkwa1 d1t3ia\_ d1n8pa\_  
d1qz9a\_ d1j9a\_ d1leg5a\_ d1p3wa\_ d3kgwa\_ d1cl1a\_ d2ctza1 d1vjoa\_  
d2rfva\_ d1gc0a\_ d1cs1a\_ d1d2fa\_ d2chl1a1 d1qgna\_ d1pffa\_ d2xlba\_  
d3m83a1 d1u08a\_ d1lc5a\_ d1b5pa\_ d2ay1a\_ d1bw0a\_ d3pd6a\_ d7aata\_  
d2csta\_ d1j32a\_ d1fg7a\_ d4wlha\_ d1o4sa\_ d1v2da\_ d1gdea\_ d1m6sa\_  
d1v72a1 d1svva\_ d1wsta1 d2f8ja2 d1lk9a\_ d1vp4a1 d1xi9a1 d2gb3a1  
d1yaaa\_ d2bnma2 d3i2ka1 d1lnsa3 d1mpxa2 d1sefa\_ d1sfna\_ d1rc6a\_  
d1rmka\_ d1ixta\_ d1eyoa\_ d1cnna\_ d1glpa\_ d1f3ka\_ d1fyga\_ d1cixa\_  
d1y29a\_ d1v7fa\_ d2jtba\_ d1g9pa\_ d1lupa\_ d1qk7a\_ d1mb6a\_ d2a2va\_  
d1niya\_ d1i25a\_ d1hvwa\_ d2mpqa\_ d1ie6a\_ d1kqha\_ d1la4a\_ d2mxoa1  
d1dl0a\_ d1koza\_ d1qk6a\_ d1emxa\_ d1lqra\_ d1c6wa\_ d1f56a\_ d1bypa\_  
d1azca\_ d1ws8a\_ d3u25a\_ d1cuoa\_ d1lid2a\_ d1rkra\_ d2iaac\_ d4dp1x\_  
d1nwpa\_ d2gima\_ d2i7sa\_ d1qhqa\_ d3ehbb1 d1fftb1 d1gyca3 d1hfua2

d1kbva1 d1kbva2 d1sdda1 d1sdda2 d1gyca2 d1mzya1 d2bw4a1 d1aoza1  
d1aoza3 d1aoza2 d1kyaa2 d1kyaa3 d1kyaa1 d1mzya2 d4e9sa1 d1sddb1  
d1sddb2 d1hfua1 d1hfua3 d1oe1a2 d1oe1a1 d1v10a2 d1v10a3 d1v10a1  
d2dara2 d2dara1 d1wyha2 d2dloa2 d1rutx4 d1rutx3 d2cuqa2 d1x41a2  
d1x41a1 d1x3ha2 d1x3ha1 d2d8za1 d1x61a2 d1x6aa1 d1x6aa2 d2cora2  
d2cora1 d1v6ga1 d1v6ga2 d2d8za2 d1x64a1 d1x64a2 d1b8ta1 d2co8a1  
d1x63a2 d2dj7a2 d2dj7a1 d2cu8a2 d2cu8a1 d1g47a1 d1j2oa1 d1wyha1  
d2dloa1 d1wiga1 d1wiga2 d2cupa2 d2cupa3 d1x68a1 d2d8ya2 d2d8ya1  
d1m3va2 d1x62a1 d1x68a2 d1x61a1 d1b8ta3 d1b8ta2 d2d8xa2 d2d8xa1  
d1x4ka1 d1x4ka2 d2cuqa1 d1m3va1 d2co8a2 d1j2oa2 d1x63a1 d2cura1  
d2cura2 d1x62a2 d1xkta1 d2hfka\_ d5d3ka\_ d2cfba1 d1o69a\_ d1bj4a\_  
d3k28a\_ d2bwpa\_ d3lg0a\_ d2fnua\_ d3ou5a\_ d1z7da1 d1b9ha\_ d1iaya\_  
d4msoa\_ d1bs0a\_ d1s0aa\_ d1sffa\_ d3tqxa\_ d1mdoa\_ d3qboa\_ d3pgya\_  
d1bjna\_ d2dkja\_ d1ejia\_ d1vefa1 d4wxga\_ d3bs8a\_ d3gbxa1 d1w23a\_  
d3kasa1 d3bi1a3 d1iknc\_ d3brda1 d1p7h11 d1oy3c\_ d1imhc1 d1gjia1  
d1zk9a1 d2cxka1 d2bema\_ d1ea9c1 d1qhoa1 d2fhfa2 d2fhfa1 d1k3ia1  
d1j0ha1 d1cxl1a1 d2bhua1 d1edqa1 d1f1sa2 d1ut9a2 d1gvia1 d1txka1  
d2phla2 d2phla1 d1fxza2 d1lrha\_ d1uija1 g1dgw.1 d2v09a\_ d1uika2  
d1uika1 d1dgwa\_ d1ktja\_ d1ds6b\_ d1fstb\_ d1ex0a1 d1ku5a\_ d1b67a\_  
d1eixa\_ d3exra\_ d2ffca1 d2fdsa1 d3n3ma1 d2czda\_ d2yyua\_ d1vqta1  
d1dbta\_ d3ldva1 d1h4ba\_ d2opoa\_ d1ydw2a d2nvwa2 d1zh8a2 d1qkia2  
d1xeea2 d1tlta2 d1r0ka3 d1j5pa3 d1vkoa2 d1vm6a2 d3qvsa2 d1p1ja2  
d2ovga\_ d1sq8a\_ d1rzsa\_ d3kz3a\_ d3orca\_ d3gpdg2 d2q49a2 d1hdgo2  
d2g17a2 d2cvoa2 d2czca1 d3pwka2 d1obfo2 d1i32a2 d1zyao2 d2pkqo2  
d1b7go2 d2hjsa2 d1cf2o2 d1vkna2 d1nvmb2 d4lt9a1 d3tc7a1 d3hoja\_  
d1i4na\_ d3vnda\_ d3n18a1 d1geqa\_ d3nav1a1 d1v5xa\_ d4a2ra1 d3tc6a1  
d1ujpa\_ d4ijba\_ d1xcfa\_ d1vc4a\_ d1rd5a\_ d3b5va\_ d2msya\_ d2djoa1  
d2r5za\_ d1au7a1 d1f43a\_ d2lmda1 d1akhb\_ d1s7ea1 d3nara\_ d1zq3p1  
d2craa1 d1mija\_ d4uuta\_ d3a01a\_ d1x58a1 d3rkqa1 d3cmya1 d2cqxa1  
d2da6a1 d1e3oc1 d1fjla\_ d1mh3a1 d1ig7a\_ d1x41a1 d1wh7a1 d1gt0c1  
d2mw8a\_ d1lfup\_ d1x2ma1 d1b72a\_ d1wi3a1 d1jgga\_ d1wjha1 d1x2na1  
d1mnm\_ d2cuea1 d3k2aa\_ d2hosa\_ d2jwta2 d1pufa\_ d1octic1 d2hi3a\_  
d1b8ia\_ d4j19a\_ d3lnqa\_ d1wh5a1 d1b8ib\_ d1fexa\_ d2cqra1 d1guua\_  
d1ug2a1 d2cqqa1 d2ajea1 d4a69c\_ d1h8ac1 d2crga1 d2iw5b1 d1xc5a1  
d1ofcx1 d2cu7a1 d1wgxa1 d2cjja1 d2ckxa1 d1gvda\_ d1hcra\_ d1gdta1  
d1u78a2 d2iu5a1 d1zk8a1 d2g7sa1 d2fd5a1 d2np5a1 d1z0xa1 d2id6a1  
d2d6ya1 d2i10a1 d1vi0a1 d2oi8a1 d3c07a1 d2ns7a1 d2fq4a1 d2yvea1  
d1t33a1 d2o7ta1 d1rkta1 d2np3b1 d2g7ga1 d2gena1 d2fbqa1 d2g7la1  
d2gfna1 d2g3ba1 d2jj7a1 d2hyja1 d1sgma1 d1ui5a1 d2hkua1 d2id3a1  
d4jyka1 d1prtc2 d1prtb2 d3lv8a\_ d1s3ga1 d1zaka1 d1s4qa\_ d3tvta2  
d1uf9a\_ d1khta\_ d1ckea\_ d1osna\_ d1p5zb\_ d4tmka\_ d3cm0a\_ d1tmka\_  
d1jaga\_ d3h86a\_ d1t0hb\_ d1nn5a\_ d2h92a\_ d3kb2a1 d2c95a1 d1yj5a2  
d1kgda\_ d1ly1a\_ d2ak3a1 d1vyva2 d1deka\_ d2grja1 d1p3ja1 d1y63a\_  
d1e4ya1 d1s96a\_ d3iija1 d1lvga\_ d1nksa\_ d1vyua2 d4e22a\_ d1qf9a\_

d1jjva\_ d1q3ta\_ d1ki9a\_ d1lw7a2 d1teva\_ d1kjwa2 d1gsia\_ d1g3ma\_  
d1j99a\_ d1t8ta1 d1nsta\_ d1zrha\_ d1ls6a\_ d2a3ra\_ d1aqua\_ d2zptx\_  
d3ckla\_ d1texa\_ d1q44a\_ d2gwaha\_ d1uj2a\_ d4gi7a\_ d2jeoa1 d1rz3a\_  
d1z0ja1 d3umra2 d3gj0a1 d2gaoa1 d1yzga1 d1x3sa1 d1g7sa4 d1puja\_  
d1udxa2 d1kk1a3 d2o52a\_ d1jwyb\_ d1zcaa2 d1zcba2 d2fv8a1 d2cjwa\_  
d3dz8a1 d1xzpa2 d1vg8a\_ d4qxaa\_ d2ew1a1 d1x1ra1 d2bcgy\_ d3doea1  
d3cona\_ d3rega\_ d3wyga\_ d1upta\_ d2b6ha1 d1zd9a1 d1lnza2 d1r5ba3  
d1n0ua2 d1r2qa\_ d2f91a1 d2rhda\_ d3q3jb\_ d3q85a\_ d1efma1 d1r8qa\_  
d2gf9a1 d2akab1 d1ek0a\_ d1z08a1 d2gcoa1 d2dy1a2 d4g01b\_ d2cxa1  
d1svia\_ d3q72a\_ d1ni3a1 d4ac9a4 d2erxa1 d2bmea\_ d1wxqa1 d2gf0a1  
d4ldja1 d1zunb3 d1d5ca\_ d4lv5b\_ d1efca3 d1kmqa\_ d2g6ba1 d3lrpa\_  
d1tada2 d2y8ea\_ d4rd4a1 d1z06a1 d2heia\_ d3a58b\_ d1u01a2 d1d2ea3  
d1zj6a1 d2ocba\_ d3rwoa\_ d1mr3f\_ d2e9sa1 d4u5xa1 d2iwra\_ d2fn4a1  
d3bwdd\_ d2nzja1 d2atva1 d2ksqa\_ d3l43a\_ d1mkya2 d1mkya1 d1wmsa\_  
d1jnya3 d2rmka\_ d1f6ba\_ d1f60a3 d1gota2 d1jala1 d2fh5b1 d1g16a\_  
d2wblc\_ d1m7ba\_ d1wf3a1 d1f5na2 d1t9ha2 d1z6xa1 d1z0aa1 d2fg5a1  
d2a5ja1 d2bcjq2 d1s0ua3 d1ky3a\_ d4y0va\_ d4lhwa\_ d2qmea1 d2atxa1  
dlegaa1 d1ryha\_ d1moza\_ d1nrjb\_ d2erya1 d3bfka\_ d1puia\_ d1fzqa\_  
d3j3az1 d3t5ga\_ d1shza2 d3defa\_ d2f7sa1 d3raba\_ d3tsoa\_ d3aq4a\_  
d2al7a1 d3sfva1 d3bc1a\_ d2ncda\_ d1sdma\_ d3h4sa1 d2heha\_ d2grya\_  
g3kin.1 d1kk8a2 d1br2a2 d1goja\_ d1f9va\_ d2mysa2 d1lkxa\_ d3t0qa\_  
d4db1a1 d3gbja\_ d1ry6a\_ d1v8ka\_ d1k8ka2 d1k8ka1 d3uleb1 d3i33a2  
d3i33a1 d1dkgd2 d1dkgd1 d4ci6a2 d1jcfa1 d4a2ba2 d2fxua1 d1yaga2  
d1yaga1 d4cbua2 d1bupa2 d3vrda1 d3vrda2 d1fcdc2 d1h1oa2 d1h1oa1  
d1m70a2 d1m70a1 d1ig8a1 d1czan2 d1czan3 d1czan1 d1ig8a2 d1czan4  
d1bg3a3 d1bg3a2 d1bg3a1 d3h1jd1 d2d0oa3 d2d0oa2 d1nbwa3 d1hroa\_  
d4gedb\_ d3zooa\_ d1mz4a\_ d1gu2a\_ d1f1fa\_ d1dvva\_ d1c6ra\_ d1c75a\_  
d1e29a\_ d1gdva\_ d1cnoa\_ d1h32b\_ d1co6a\_ d2bh4x\_ d2aiua\_ d5cytr\_  
d1jdl\_ d1i8oa\_ d2zboa\_ d3dmia\_ d1ls9a\_ d1wvec\_ d2yk3a\_ d3ph2b\_  
d1dw0a\_ d5aura\_ d1ql3a\_ d1qn2a\_ d1f1ca\_ d2nqya\_ d1h4ga\_ d1hixa\_  
d1oa2a\_ d1olra\_ d3b7ma\_ d4h7ma1 d3wp3a\_ d2vgda\_ d1ligoa\_ d3zsea\_  
d2nlra\_ d3wx5a\_ d1oa3a\_ d1pvxa\_ d1m4wa\_ d1f5ja\_ d1ks5a\_ d4ix1a1  
d2ah2a1 d1n1ta1 d1evsa\_ d1cnt1\_ d1pvhb\_ d1z7ca\_ d1huwa\_ d1bgea\_  
d1rhga\_ d1f6fa\_ d1f45b\_ d1ilrb\_ d1axia\_ d1letea\_ d3tgxb\_ d2z3qa1  
d3qb1a\_ d1hula\_ d1m48a\_ d4nkqb\_ d1eera\_ d1v7mv\_ d5e4ea\_ d2o27a\_  
d3b5ka\_ d2psma1 d4zf7a\_ d3uf5a\_ d4x51a\_ d4ypgc1 d3oq3a\_ d1lqsl\_  
d1n1fa\_ d1aula\_ d1wu3i\_ d3bes1\_ d3ux9a\_ d3rbaa\_ d2qtra\_ d3l92a\_  
d1f9aa\_ d1qjca\_ d2h29a\_ d1vlha\_ d1lod6a\_ d1lw7a1 d1mrza2 d4ruka\_  
d2el7a\_ d1liq0a2 d1irxa2 d1r6ta2 d1ivsa4 d2cyba\_ d1rqga2 d1j09a2  
d2yxna\_ d1f7ua2 d1h3fa1 d1ffya3 d2g36a1 d1nzja\_ d1jila\_ d1n3la\_  
d1pfva2 d1h3na3 d3n9ia\_ d3sz3a1 d3sw2a\_ d1moxc\_ d1dx5i3 d1edmb\_  
d1aut12 d1aut11 d1nqlb\_ d1dval1 d1szba2 d1kigl\_ d2y5fl\_ d1ijqa2  
d1gk5a\_ d1g1sa2 d1nt0a3 d1xdtr\_ d1lmja2 d1lmja1 d2wphe\_ d1klil\_  
d1pfx12 d1pfx11 d1p9ja\_ d1g1ta2 d1f7ea\_ d4yzub\_ d1lr7a1 d2mgpa1

d1b9wa1 d2mgpa2 d1ob1c1 d1ob1c2 d1n1ia2 d1n1ia1 d2npra2 d2npra1  
d2y5ia\_ d1qlsa\_ d1psra\_ d3n22a\_ d2egda\_ d4ggfc\_ d2wcea\_ d2luca\_  
d4aqia\_ d3nsia\_ d2lp3a\_ d1j55a\_ d1a4pa\_ d1k8ua\_ d1nsha\_ d1pvaa\_  
d3fs7a\_ d2pvba\_ d1ttxa\_ d2kyfa\_ d1rk9a\_ d1a75a\_ d1exra\_ d1tiza1  
d1nyaa\_ d1g8ia\_ d1ggwa\_ d1wdcc\_ d3fwba\_ d1ggza\_ d2o5ga\_ d1ctaa\_  
d1m45a\_ d3i5gc\_ d1s18a\_ d1fpwa\_ d2scpa\_ d2roaa\_ d4aqra\_ d3pn7b\_  
d1br1b\_ d2mysb\_ d1s6ca\_ d1bjfa\_ d2obha\_ d1jfka\_ d1jf0a\_ d1qv0a\_  
d1lkja\_ d2mlfc\_ d2m97a\_ d2d8na\_ d4by5a\_ d1jbaa\_ d4nqga\_ d1wdcb\_  
d2mysc\_ d1j7qa\_ d1s6ia\_ d1uhka2 d1r2ua\_ d1dtla\_ d3kf9a\_ d3pn7c\_  
d1fi6a\_ d1c07a\_ d5d67d\_ d1tuza\_ d1h8ba\_ d1eg3a1 d1eg3a2 d2zkmx1  
d1snla\_ d1sfsa\_ d1jfxa\_ d1wkya2 d1uuqa\_ d3wh9a\_ d4m1ra\_ d1xyza\_  
d4xuya\_ d2je8a5 d4bf7a1 d3cuia\_ d1ur4a\_ d1qw9a2 d1odza\_ d2vzsa5  
d1bqca\_ d2x2ya1 d1hjqa\_ d1qnra\_ d4y7ea1 d1vjza\_ d4k68a\_ d2v3ga\_  
d4hpga\_ d1nofa2 d1nq6a\_ d1h4pa\_ d1aq0a\_ d3ziza\_ d4bs0a\_ d1ecea\_  
d1h1na\_ d1ta3b\_ d1w91a2 d1i1wa\_ d1uhva2 d1egza\_ d7a3ha\_ d1tvna1  
d3nyda1 d1ghsa\_ d2cyga1 d4xv0a\_ d2c8na2 d1w32a\_ d3emca\_ d1v6ya1  
d1foba\_ d2uwfa1 d2fgla\_ d3niya1 d2c0ha1 d1rh9a1 d1yq2a5 d1szna2  
d1fa2a\_ d1pama4 d5do8a1 d1ea9c3 d1hx0a2 d2fhfa5 d1qhoa4 d1avaa2  
d1m53a2 d4m8ua1 d2gjpa2 d1lwha2 d4howa1 d1ktba2 d1j0ha3 d3vm5a1  
d2x1ia\_ d1wzaa2 d1uasa2 d2diea1 d1mxga2 d1ht6a2 d1eswa\_ d1iv8a2  
d5cpsa\_ d1ud2a2 d1zjaa1 d3gbea1 d1kwga2 d1wdpa\_ d1gcya2 d1g5aa2  
d1hvxa2 d3dhp2 d2bhua3 d4do4a1 d3qgva1 d1e43a2 d1g94a2 d2d3na2  
d1gjwa2 d1gvia3 d1x1na1 d1r7aa2 d1tz7a1 d4c7ga2 d2gjxa1 d1nowa1  
d1jaka1 d1yhta1 d4toqa\_ d1wb0a1 d1w9pa1 d1eoka\_ d1itxa1 d1kfw1  
d1goia2 d1edqa2 d2gsja\_ d1hjxa1 d1jnda1 d1vf8a1 d3wdpp1 d3wq5a\_  
d1gnxa\_ d4gxpa\_ d4hz8a\_ d1e4mm\_ d3aiua\_ d1wcga1 d1qvba\_ d3ahxa\_  
d1v02a\_ d2dgaa\_ d1vffa1 d1qoxa\_ d4ha4a\_ d1mixa2 d1e5wa2 d1j19a2  
d1isna2 d2a16b2 d3syxa1 d1mkea1 d2p8va\_ d1xoda1 d1i7aa\_ d1evha\_  
d1egxa\_ d1x14a1 d1n9pa\_ d3vsqa\_ d2gixa1 d2v76a\_ d1wj1a1 d1aqca\_  
d1qqga2 d1qqga1 d1n3ha\_ d4dbba\_ d3f0wa1 d1p3ra\_ d1wgua1 d2cy4a1  
d3hqca\_ d1wvha1 d1xr0b1 d3nvva1 d1krha3 d2h88b1 d1n62a2 d1t3qa2  
d1zoyb1 d1jq4a\_ d1ffva2 d1dgja2 d1rm6c2 d1h6ta1 d1h6ua1 d9ldta1  
d2ewda3 d1up7a1 d2dfda1 d1s6ya1 d1vjta1 d7mdha1 d1hyea1 d1t2da1  
d1ojsa3 d1b8pa1 d1ldna1 d1hyha1 d1civa1 d2a92a1 d1ez4a1 d1i0za1  
d1y6ja1 d1gv0a1 d1ur5a1 d1llda1 d1obba1 d1v8ba1 d1gdha1 d2dlda1  
d1mx3a1 d1ygya1 d1qp8a1 d1li4a1 d1j4aa1 d2naca1 d1npya1 d3t4ea2  
d1a4ia1 d1o0sa1 d2hk9a2 d2egga2 d1b26a1 d1bvua1 d1gq2a1 d1c1da1  
d1leha1 d1gtma1 d1nvtal d3dona2 d1edza1 d1gpja2 d1vi2a1 d1p77a1  
d1nyta1 d1b0aa1 d1vl6a1 d1v91a1 d1txga2 d3f47a1 d1mv8a2 d2pv7a2  
d1xc2a3 d2ahra2 d4xiya1 d2f1ka2 d1pgja2 d1i36a2 d1np3a2 d1lj8a4  
d1teaa3 d1qmga2 d2i76a2 d2g5ca2 d1wdka3 d1dlja2 d3cuma3 d1kola2  
d1f8fa2 d1qora2 d1jqba2 d1vj0a2 d1cdoa2 d1gu7a2 d1d1ta2 d1xa0a2  
d2dm6a2 d1jvba2 d1rjwa2 d1llua2 d1tt7a2 d1piwa2 d1o89a2 d1iz0a2  
d1e3ja2 d1yb5a2 d1uufa2 d1vj1a2 d1e3ia2 d3gpdg1 d1vc2a1 d2nvwa1

d1u8fo1 d1ydwa1 d1hdgo1 d2g17a1 d1cf2o1 d2czca2 d1r0ka2 d1obfo1  
d2cvoa1 d1ebfa1 d1h6da1 d1i32a1 d1zh8a1 d2q49a1 d1qkia1 d1j5pa4  
d3pzra1 d1xeea1 d1vkoa1 d1vm6a3 d3qvsa1 d2pkqo1 d1b7go1 d1gr0a1  
d1p1ja1 d1lc0a1 d1j0xo1 d3pwka1 d2hjsa1 d1zyao1 d1vkna1 d1t1ta1  
d1nvmbl d3sjua\_ d3ojfa1 d1xu9a1 d2jjya1 d1n7ha\_ d1y1pa1 d1h5qa\_  
d1jtva\_ d4fs3a\_ d2bkaa1 d1gy8a\_ d2c5aa1 d1ulsa\_ d1ooea\_ d2b69a1  
d1y5ma1 d1spxa\_ d1aela\_ d1bxka\_ d1ydea1 d1gega\_ d1hdoa\_ d1o5ia\_  
d1e6ua\_ d1snya1 d2rhca\_ d3zv4a\_ d5ceja\_ d2d1ya1 d1fjha\_ d3w8ea\_  
d2fmua1 d1x1ta\_ d1rpna\_ d3ay7a1 d1k2wa\_ d1eq2a\_ d2hrba1 d3ruaa\_  
d2ew8a1 d4hwka\_ d1xgka\_ d2bd0a1 d1yo6a1 d2a35a1 d2ntva\_ d1vl8a\_  
d1hdca\_ d4bkua\_ d2ag5a1 d2q45a\_ d1nffa\_ d4iy1a\_ d1zbqa1 d1kewa\_  
d1ek6a\_ d1ja9a\_ d2q46a2 d1iy8a\_ d1cyda\_ d2ptga\_ d1hxha\_ d1uzma1  
d3lyla\_ d4m89a\_ d3wyea\_ d2b1la1 d1w6ua\_ d1sb8a\_ d2q2va\_ d4nr0a\_  
d1e6wa\_ d2gasa\_ d3oiga1 d2bgka1 d1mxha\_ d1vl0a1 d1rkxa\_ d1r6da\_  
d1wmaa1 d1e7wa\_ d2c07a1 d1xkqa\_ d3tzha\_ d1g0oa\_ d3lz6a\_ d1qyca\_  
d1ledoa\_ d1gz6a\_ d1oc2a\_ d1t2aa\_ d1zema1 d2xoxa\_ d1z45a2 d1p33a\_  
d3lt0a\_ d4e6pa\_ d2wyua\_ d1db3a\_ d4q9na\_ d1xhla\_ d4o1ma\_ d1fmca\_  
d2uvda\_ d2gdza1 d1uaya\_ d2z1ma\_ d2o23a2 d2fr1a2 d2fr1a1 d1qsga\_  
d1qyda\_ d4zjua\_ d2a4ka1 d1yb1a\_ d1wvga1 d1yxma1 d3f4ba\_ d1mg5a\_  
d1xg5a1 d2gfoa1 d1vjva\_ d2ayna1 d3nhea\_ d3u1ra1 d1g9ka2 d1kapp2  
d1t3ca\_ d1epwa3 d2a97a\_ d3fiea\_ g1e1h.1 d3ioqa\_ d1fh0a\_ d1o0ea\_  
d1khqa\_ d1m6da\_ d2cb5a\_ d1cs8a\_ g8pch.1 d1s4va\_ d2pnsa\_ d1vsna1  
d1mira\_ d1iwda\_ d2oula\_ d7pcka\_ d3bwka\_ d3bcna\_ d2p86a\_ d1pvja\_  
d1pcia\_ d1gece\_ d1deua\_ d4bs6a\_ d1xkga1 d1cqda\_ d1jqpa2 d2c0ya\_  
d2bdza\_ d3p5ua\_ d1zoya1 d1qo8a2 d1d4ca2 d1chua2 d1jnra2 d2jk6a2  
d2jk6a1 d1fecal d1fecal d1l1pfa1 d1l1pfa2 d1xhca1 d1xhca2 d1dx1a2  
d1dx1a1 d1gera2 d1m6ia2 d1onfa1 d1onfa2 d3lada2 d3lada1 d1w4xa1  
d1w4xa2 d1gesa2 d1mo9a1 d1xdia1 d1fl2a1 d1fcda1 d1fcda2 d1h6va2  
d1h6va1 d1mo9a2 d1gv4a2 d1gv4a1 d2gv8a2 d2gv8a1 d1aoga1 d1aoga2  
d1hyua1 d1ebda1 d1ebda2 d3dk9a1 d1q1ra2 d1q1ra1 d1gesa1 d1pv8a\_  
d1w5qa\_ d2c1ha\_ d1ohla\_ d1zbfal d2z1ha\_ d2etja1 d3qioa1 d1j11a\_  
d2e4la\_ d1j12a\_ d21sna1 d1io2a\_ d1uaxa\_ d2yv0x\_ d1mu2a1 d1leka\_  
d1i39a\_ d1pn0a1 d1reoa1 d1ju2a1 d2f5va1 d3c96a1 d2gmha1 d1pj5a2  
d1o5wa1 d1n4wa1 d1k0ia1 d2dw4a2 d2ivda1 d1seza1 d2voua1 d1kdga1  
d1s5ja1 d2hbja2 d2igia\_ d1wlja\_ d1qhta1 d4dlea1 d1tgoa1 d2f96a1  
d3tr8a1 d3mxma\_ d1y97a1 d1w0ha\_ d1kfsa1 d2py5a1 d1noya\_ d1d5aa1  
d1yt3a3 d2guia\_ d3mwpa1 d4kb1a\_ d2hmta\_ d1lssa\_ d1iuka\_ d2csua1  
d3q9ub\_ d2yv1a1 d3q9na\_ d2d59a\_ d1oi7a1 d2yv2a1 d1y81a1 d1wgqa1  
d1v89a1 d2coda1 d1zc3b\_ d1wg7a1 d1u5ea1 d1v61a1 d2coca1 d2ys1a1  
d1v5pa1 d1ntya2 d1wjma1 d1wi1a1 d1u29a\_ d1xx0a1 d1unqa\_ d2zkmx3  
d1fhoa\_ d1v88a1 d2adza1 d1x1fa1 d1p6sa\_ d2coaa1 d1btka\_ d1v5ma1  
d1faoa\_ d2x18a\_ d1dyna\_ d1x1ga1 d4kaxb\_ d2j59m1 d1kilb2 d1xcga2  
d1txda2 d1u5da1 d1w1ha\_ d1upqa\_ d1v5ua1 d1foea2 d2fjla1 d1leaza\_  
d2dfka2 d2cofa1 d1kz7a2 d1jmx2a1 d1jmx1a1 d1pbya1 d1r7ha\_ d1faaa\_

d1wika1 d1xfla\_ d1ttza1 d2f51a1 d1ti3a\_ d1nhoa\_ d1sena\_ d2i4aa\_  
d1ep7a\_ d1zmaa1 d1fo5a\_ d3lefa1 d3diea1 d2yana1 d1z6na1 d1oaza\_  
d3zywa1 d4aj8a\_ d1nm3a1 d4fiwa\_ d1wmja\_ d4hs1a1 d1liloa\_ d1xwaa1  
d1wjka1 d2vmla\_ d1fb6a\_ d1gh2a\_ d1h75a\_ d1nw2a\_ d1kx5b\_ d3a6na\_  
d4m6ba2 d2nqbd\_ d3wkjd\_ d2yfwe\_ d4h9na\_ d5bnxa\_ d1kx5c\_ d3r45a\_  
d1eqzb\_ d4jjnb\_ d1f66c\_ d1eqza\_ d4wnnb\_ d1kx5a\_ d1u35c1 d1id3a\_  
d2nqbc\_ d1kx5d\_ d3us3a3 d3us3a1 d2b5ea2 d2b5ea3 d2b5ea1 d2b5ea4  
d2kp1a1 d2kp2a1 d1hyua3 d1hyua4 d1j08a1 d1j08a2 d1pd212 d1nhya2  
d2a2ra2 d1k0dd2 d1f2ea2 d1gsua2 d1f3ba2 d2fhea2 d2pvqa1 d1tw9a2  
d1oyja2 d1e6ba2 d1k0ma2 d3ik7a1 d4is0a1 d1r5aa2 d1jlva2 d1m0ua2  
d3gtub2 d1z9ha2 d1okta2 d1axda2 d2gsra2 d1tu7a2 d1k3ya2 d1zgm1  
d1b48a2 d1gwca2 d2gsta2 d1glqa2 d1oe8a2 d1pn9a2 d1v2aa2 d1fw1a2  
d1duga2 g1f8v.1 d1novc\_ d2bbvc\_ d1qqya\_ d1gd6a\_ d1livma\_ d2gv0a\_  
d1iiza\_ d2z2fa\_ d1j8xa\_ d1ghla\_ d1b9oa\_ d1741a\_ d1691a\_ d2o4wa\_  
d1p37a\_ d1k28a3 d1xjta1 d1jtma\_ d2f2qa\_ d4e97a1 d2za0a\_ d2c21a1  
d2pjsa1 d1k1la\_ d2i7ra1 d1xqaa1 d5cj3a1 d1npba\_ d1jifa\_ d2p7oa\_  
d1r9ca\_ d1nkia\_ d1mpya2 d1kw3b2 d1kw3b1 d4ghga1 d1tfza1 d3isqa1  
d3isqa2 d1sqia1 d1sqia2 d1lkda2 d1lkda1 d1mpya1 d1cjxa2 d1cjxa1  
d1sp9b2 d1t47a1 d1t47a2 d1flua2 d1sp8a1 d1sp8a2 d1flua1 d1etob\_  
d1umqa\_ d1g2ha\_ d1iyka2 d1rxta1 d1iica2 d1iica1 d1qsta\_ d2beia1  
d4m3sa\_ d1u6ma1 d1ygha\_ d1yk3a1 d3dr6a\_ d1xmta\_ d1z4ea1 d2ge3a1  
d1bo4a\_ d2fiaa1 d2jdca1 d1y9wa1 d3to7a\_ d1wwza1 d2fl4a1 d2ozua1  
d2b5ga\_ d2cy2a1 d2p0wa\_ d4pswa\_ d1yrea1 d1yr0a1 d1m4ia\_ d2gana1  
d1yvka1 d1ghea\_ d2g3aa1 d1y7ra1 d2euia1 d1q2ya\_ d2fsra1 d1xeba\_  
d2ae6a1 d1cjwa\_ d1qsma\_ d2aj6a1 d1y9ka1 d1i12a\_ d1vkca\_ d2atra1  
d1n71a\_ d2d4pa1 d2fiwa1 d2fe7a1 d1tiqa1 d2ou2a\_ d1yx0a1 d2fcka1  
d1p0ha\_ d2j8ma\_ d2pq8a\_ d1z4ra1 d1s3za1 d1ufha\_ d2hqya1 d2hqya2  
d1lrza2 d1lrza3 d1ne9a2 d1f37b\_ d1xvqa1 d1pn0a2 d3hy2a\_ d2cvba1  
d1o8xa\_ d1lu4a\_ d1we0a1 d2bmx1a1 d2a4va1 d1psqa\_ d1xiya1 d1q98a\_  
d1n8ja\_ d1zofa1 d2ggta\_ d3tjja\_ d4je1a1 d1o73a\_ d3s9fa\_ d2zcta\_  
d1qmva\_ d1jfua\_ d2b1ka\_ d5dvba1 d2b5xa1 d2v2ga\_ d3tb2a\_ d4llra\_  
d4fh8a1 d1e2ya\_ d1knga\_ d2h30a\_ d1i5ga\_ d2z9sa\_ d2f8aa1 d1tp9a1  
d2b7ka\_ d1nm3a2 d3hvva\_ d2wfca1 d4kcea\_ d1xvwa1 d4gqca1 d3qpma\_  
d4k1fa\_ d1zzoa1 d1gp1a\_ d1prxa\_ d1zsq1a1 d2qked\_ d4ksoa\_ d1t4za1  
d1wwja\_ d1f74a\_ d3l21a\_ d2e1da\_ d1to3a1 d1w3ia\_ d1sfla\_ d1n7ka\_  
d1vcva1 d4imea\_ d1wa3a\_ d2ocza1 d1f2ja\_ d3m16a\_ d2yxga\_ d1ub3a\_  
d3a5fa\_ d1fbaa\_ d1l6wa\_ d1xfba1 d1wx0a1 d1vpxa1 d1ojxa\_ d1mxsa\_  
d2a4aa1 d1xkya1 d3cq0a1 d3s1xa\_ d1fdja\_ d3cp1a1 d4d2ja\_ d4mh8a\_  
d1mu2a2 d4i7ga1 d1etha2 d1w52x1 d2ppla1 d1hpla2 d1lpbb2 d2oxea1  
d1bu8a2 d1rpla2 d1ys1x\_ d4hs9a\_ d1ispa\_ d1ex9a\_ d1ku0a\_ d3qmma\_  
d1lgya\_ d4l3wa\_ d1llfa\_ d1gz7a\_ d1lukca\_ d4wfia\_ d4cg1a1 d3visa\_  
d1c4xa\_ d1jlia\_ d2rhwa\_ d1ra6a\_ d1muka\_ d3gsza\_ d1khva\_ d1te9a\_  
d2xwha\_ d3uqsa\_ d3hkwa\_ d3n6ma\_ d2cjqa\_ d2xyma\_ d1teba\_ d1te8a\_  
d1s48a\_ d1u09a1 d4wfxa\_ d3tyqa\_ d2pgga1 d3zxha\_ d1cgl\_a\_ d1rm8a\_

d1eaka2 d1hy7a\_ d2jsda\_ d1cxva\_ d1hv5a\_ d1i76a\_ d1m41a\_ d2bk7a\_  
d3fjua\_ d1z5ra1 d1kwma1 d1uwya2 d1jqga1 d2c1ca1 d1dtda\_ d1h8la2  
d2tbvc\_ d1c8nc\_ d1x36a\_ d1smvc\_ d1ng0c\_ d4sbvc\_ d1lopoa\_ d1f2nc\_  
d1e57b\_ d1auyb\_ d1f15b\_ d1za7a\_ d1laja\_ d1rypd\_ d1lirua\_ d1rypc\_  
d3unfk\_ d1rypa\_ d1j2pa\_ d1lirui\_ d1j2qh\_ d3unfh\_ d1m4ya\_ d1rypb\_  
d1lirul\_ d1lirug\_ d1liru2\_ d1q5rh\_ d1rypg\_ d1g3ka\_ d1q5qa\_ d1e94a\_  
d1lirub\_ d1ryph\_ d3ty6a\_ d1liruj\_ d1liruk\_ d1rype\_ d1lirud\_ d1lirue\_  
d3mi01\_ d1rypf\_ d1liruh\_ d2z3ba\_ d1liruc\_ d3mka2\_ d1liru1\_ d1ny721  
d1ny722 d1a6ca3 d1a6ca2 d1pgl22 d1pgl21 d1pgl11 d1ny711 d1mqta\_  
d1d4m3\_ d1fmd3\_ d2mev1\_ g1aym.1 d1ev13\_ d4q4w1\_ d1rla3\_ d2x5ia\_  
d1rhi1\_ g1r1a.1 g1d4m.1 g1rhi.1 d1b35b\_ d1loopa\_ d1tme1\_ d4iv1a\_  
g1pvc.1 g1fpn.1 d1fpn1\_ d4gb31\_ d1d4m1\_ d1fmd1\_ d2wzr3\_ g1cov.1  
d1qqp3\_ g1fmd.1 d2x5ic\_ d1rhi3\_ g1oop.1 d1hxs1\_ g1hxs.1 d1fpn3\_  
d1bev1\_ g2mev.1 d1eah3\_ d1aym1\_ d1pvc3\_ d1qqp1\_ d1zba3\_ d1h8ta\_  
d3vbhc\_ g1b35.1 g1bev.1 d1hxs3\_ g1ev1.1 d1bev3\_ g1tmf.1 d1tmf1\_  
d1b35a\_ d2mev3\_ g1eah.1 g1h8t.1 d1eah1\_ d4q4w3\_ d1rla1\_ d1aym3\_  
d1pvc1\_ d1zba1\_ d1h8tc\_ d1oopc\_ d1tme3\_ g1qqp.1 d4iv1c\_ g1tme.1  
d3ubub\_ d1legia\_ d1qo3c\_ d1v7pa\_ d1tdqb\_ d3ubua\_ d1c3ab\_ d1h8ua\_  
d3bx4b\_ d1t8ca1 d1sb2a1 d1qdda\_ d2ziba1 d3cada\_ d1byfa\_ d1j34b\_  
d1jwia\_ d1jzna\_ d1c3aa\_ d1oz7b\_ d1wmza\_ d3bdwb\_ d1hq8a\_ d1fifa1  
d1dv8a\_ d3hupa\_ d1wk1a1 d1umra\_ d2afpa\_ d3bx4a\_ d1gz2a\_ d1sl6a\_  
d1v7pb\_ d3g8ka\_ d1ixxa\_ d1j34a\_ d1jwib\_ d1g1sa1 d1y17a1 d1ja3a\_  
d1fvub\_ d3bdwa\_ d1sb2b1 d1fvua\_ d1umrc\_ d1oz7a\_ d4m17a\_ d3cfwa1  
d1ypqa1 d1g1ta1 d3fd4a\_ d3l9jc\_ d4dn8a1 d1v41b\_ d1rdl1\_ d2msba\_  
d3ia2a\_ d1a88a\_ d4dgqa1 d1hkha\_ d1zoia\_ d1ux8a\_ d1dlya\_ d4i0va\_  
d2bkma\_ d1dlwa\_ d2bmma\_ d2r80b\_ d1cqxa1 d1cg5a\_ d1gcvb\_ d3boma\_  
d2h8fb\_ d2raoa\_ d3bj1a\_ d4hrrb\_ d2r50a\_ d3d1kb\_ d2aa1b1 d3zhwa\_  
d3hf4b\_ d3gdja\_ d1jebb\_ d3bj1b\_ d1x9fb\_ d1wmub\_ d1gcva\_ d3bcqb\_  
d3d4xb\_ d1gvha1 d2dc3a\_ d3hf4a\_ d4yu3a\_ d3k8ba\_ d1qpwb\_ d2r80a\_  
d3bcqa\_ d1v4wa\_ d3wtgb\_ d1j17a\_ d4esaa\_ d1a9we\_ d3d1ab\_ d1fsla\_  
d4h21a\_ d1v4wb\_ d1mwca\_ d1vhba\_ d1jeba\_ d1spgb\_ d1h97a\_ d1q1fa\_  
d1tu9a1 d3d1aa\_ d1hdsb\_ d3hyub\_ d2zfb\_ d3fs4a\_ d1oj6a\_ d1shrb\_  
d4h21b\_ d4yu3b\_ d1spga\_ d3hrwa\_ d3qqra\_ d3at5a\_ d4wchd\_ d3hyua\_  
d1cg5b\_ d1uc3a\_ d1hbra\_ d2raob\_ d1outb\_ d4esab\_ d3gdjb\_ d3qqqa\_  
d1x9fc\_ d3vrfa\_ d1litha\_ d3mkba\_ d3d4xa\_ d3mjpa\_ d1j16a\_ d3fh9a\_  
d1outa\_ d2dc3b\_ d1lit2a\_ d3eoka\_ d3g46a\_ d1qpwa\_ d3vrfb\_ d1x9fd\_  
d1hdsa\_ d2zfba\_ d3mkbb\_ d1or4a\_ d3wtga\_ d1a4fa\_ d3fh9b\_ d3bomb\_  
d3cy5a\_ d3at5b\_ d1x9fa\_ d2oifa\_ d4lmb\_ d1cpcb\_ d3v57a\_ d1kn1a\_  
d1cpca\_ d4f0ta\_ d2vjha\_ d4po5b\_ d1eyxa\_ d1alla\_ d4f0tb\_ d1b33b\_  
d1b8db\_ d4h0mb\_ d1b33a\_ d2vjhb\_ d4lmb\_ d2vmlb\_ d1allb\_ d2vjta\_  
d3dbja\_ d2vmla\_ d2vjtb\_ d4f0ub\_ d1f99b\_ d4rmpa1 d1liaa\_ d1eyxb\_  
d2uulb\_ d4lmsb\_ d4f0ua\_ d2bv8a\_ d1f99a\_ d2bv8b\_ d2c71b\_ d3dbjb\_  
d4rmpb1 d1b8da\_ d4h0ma\_ d3v57b\_ d1liab\_ d2uula\_ d2j96a\_ d1azwa\_  
d1mtza\_ d1sfra\_ d1f0na\_ d4qeka\_ d3c8da2 d2pbla1 d1jkma\_ d1jjia\_



d1lzla\_ d1gkub1 d1gkub2 d2qvba\_ d2v9za\_ d4kafa1 d1b9ra\_ d1offa\_  
d1frra\_ d3wcqa\_ d1e9ma\_ d1l5pa\_ d1wria\_ d1i7ha\_ d3av8a\_ d1czpa\_  
d1rfka\_ d3p1ma1 d3b2ga\_ d2bt6a2 d4iuua3 d4bvva\_ d5hpga\_ d3k65a\_  
d1ki0a3 d1ki0a2 d1ki0a1 d1a0ha1 d1pmla\_ d3sp8a3 d2feba1 d2m5ta\_  
d1cqqa\_ d1wqsa\_ d5bpea\_ d2ipha\_ d1lvoa\_ d2bhga1 d3tnta\_ d3sjia\_  
d3d23a1 d2fyqa\_ d3tloa\_ d3zvea1 d3q3ya1 d4asha1 d1cg2a1 d1yloa2  
d1y7ea2 d1y0ya3 d1lfwa1 d1vixa1 d1fnoa4 d1vhua2 d1ysja1 d1vhea2  
d1z2la1 d2fvga2 d1r3na1 d2grea2 d1xmba1 g1q7l.1 d1rtqa\_ d3rp2a\_  
g1lucy.1 d1fuja\_ d2zchp\_ d3w94a\_ d1si5h\_ d1lo6a\_ g2pka.1 d1cgha\_  
d1kigh\_ d1a5ia\_ d3s9ba\_ d1hj8a\_ d1ao5a\_ d2anya\_ d1q3xa1 d1gvza\_  
d1azza\_ d4gsoa\_ d2f91a1 d1liaua\_ d1gdna\_ d1eufa\_ g1fiw.1 d1eq9a\_  
d4nfea\_ d2rdla\_ d1spja\_ d1elva1 d1a7sa\_ d1ekbb\_ d1pfxc\_ d1yc0a\_  
d2aiqa\_ g1fiz.1 d1fi8a\_ d4k60a\_ d4dgja\_ d1mzaa\_ d1lop0a\_ d3tjva\_  
d1pytd\_ d1sgfg\_ g1gg6.1 d2eeka\_ g1rtf.1 d1a0ja\_ d3g01a\_ d1pytc\_  
d4e7na\_ d1ddja\_ d1z8ga1 d2hlca\_ d1npma\_ g1jou.1 d1sgfa\_ d1autc\_  
g2hnt.1 g1kdq.1 d1orfa\_ d3s69a\_ d4crga\_ d1fxya\_ d1bqya\_ d2ftba\_  
d1pmpa\_ d2rcqa1 d1fdqa\_ d4lkpa\_ d1sa8a\_ d1vyfa\_ d1lpja\_ d3vg7a1  
d4azqa1 d1o8va\_ d5bvqa\_ d1p6pa\_ d2qo4a\_ d1opba\_ d1yiva1 d1o1va\_  
d4bvma1 d4tkba\_ d4i3ba\_ d1bwya\_ d1ggla\_ d4gkca\_ d1cbia\_ d3p6da1  
d1kqwa\_ d2a0aa1 d1dzka\_ d4tlja\_ d2a2ua\_ d4wfva\_ d3t1da\_ d4iaxa\_  
d3zq3a\_ d2nnda\_ d1i4ua\_ d1kxoa\_ d1bbpa\_ d1kt7a\_ d1lexsa\_ d3s26a1  
d1lf7a\_ d1qfta\_ d4gh7a\_ d1z24a1 d1qabe\_ d1xkia\_ d1ew3a\_ d3bx7a\_  
d4iaawa1 d1n0sa\_ d1gkab\_ d3kzaa\_ d2k23a\_ d2l9ca1 d2joza1 d1gm6a\_  
d3kffa\_ d3saoa1 d1e5pa\_ d1yupa1 d3lgia\_ d3i77a\_ d2z9ia2 d4nsva\_  
d1lcya2 d4jcna\_ d1agja\_ d1os8a\_ d1hpga\_ d1p3ca\_ d1l1ja\_ d1qtfa\_  
d1e69a\_ d1mv5a\_ d3g60a4 g1ii8.1 d1ewqa2 d1ji0a\_ d1qhla\_ d1v43a3  
d2wmfa1 d1vpla\_ d1g2912 d4a82a2 g1f2t.1 d2d62a1 d3tuic1 d2bbsa1  
d3g60a3 d2ixea\_ d1g6ha\_ d1sgwa1 d2qi9c\_ d3rlfa1 d3b60a1 d3d31a2  
d2pzea1 g1xew.1 d1oxxk2 d2onka1 d1wlwa\_ d1iwea\_ d1qf5a\_ d1vmaa2  
d1nija1 d1np6a\_ d2p67a1 d3ihla\_ d1okkd2 d1ls1a2 d1slma2 d1liona\_  
d2v40a\_ d1dj3a\_ d3hida\_ d2vo1a1 d2g0ta1 d1vcoa2 d1j8mf2 d1g3qa\_  
d1xjca\_ d1p9ba\_ d1qzxa3 d1ihua2 d1ihua1 d2qm8a\_ d1dj2a\_ d4ioja\_  
d1cp2a\_ d1yrba2 d1hyqa\_ d3gqba2 d1skye3 d1xp8a1 d1tf7a2 d1tf7a1  
d1ye8a1 d1skyb3 d2qe7d2 d4blta\_ d4huta\_ d3l1daa2 d4hyya\_ d2i3ba1  
d1crla\_ d3j9tb2 d3ntua2 d1vdza1 d2z43a\_ d1e9ra\_ d1nlfa\_ d3ziaa2  
d1n0wa\_ d3ziad2 d3j9ta2 d1pzna2 d3gqbb2 d2i49a\_ d1nnfa\_ d1xvxa\_  
d1ursa\_ d1h3da1 d1iuda\_ d4m1va1 d1twya\_ d3e13x\_ d2nxoa1 d4pfua\_  
d3ttma\_ d1elja\_ d2qmwa1 d1us5a\_ d1y3na1 d1jeta\_ d1uqwa\_ d4f19a1  
d2esna2 d3thia\_ d3fasa1 d2uyeb\_ d2xwva1 d1r9la\_ d2fyia1 d1pb7a\_  
d2ozza1 d1sw5a\_ d1nh8a1 d1vr5a1 d2g29a\_ d1xs5a\_ d3lswa\_ d2z23a\_  
d3w9va\_ d3tcha\_ d1q35a\_ d1z7me1 d3q27a\_ d1p99a\_ d1ve4a1 d2i6ea1  
d4mcoa1 d4n8ya\_ d1eu8a\_ d1zbma1 d1hsla\_ d1ixca2 d1j1na\_ d1xvya\_  
d1y9ua\_ d2z22a1 d1xoca1 d4oera\_ d1wdna\_ d5f1qa1 d1xt8a1 d1i6aa\_  
d4gwoa\_ d4igta1 d1pc3a\_ d4mmpa1 d1o63a\_ d2czla1 d2onsa2 d4mija1

d4ok5a1 d2bmfa1 d2bmfa2 d1yksa1 d1yksa2 d1jr6a\_ d2qeqa1 d2j1qa1  
d1eh3a\_ d3skpa\_ d1dtza1 d1ieja\_ d1jnfa2 d1ce2a1 d1jnfa1 d1b1xa2  
d1b1xa1 d1jw1a1 d1jw1a2 d1ryoa\_ d1h76a1 d1h76a2 d1c4oa1 d2p6ra3  
d2p6ra4 d1oywa2 d1oywa3 d1wrba1 d1w36b2 d1w36b1 d1c4oa2 d3bora\_  
d1t6na\_ d2eyqa5 d2eyqa3 d2eyqa2 d2zu6a2 d1veca\_ d1uaaa1 d1w36d1  
d2g9na1 d1z3ix2 d2rb4a\_ d1hv8a1 d1hv8a2 d1t5ia\_ d1w36c2 d2j0sa2  
d2j0sa1 d1fuka\_ d3hjha1 d1z5za1 d1z63a1 d1s2ma2 d1s2ma1 d1wp9a1  
d1wp9a2 d1gm5a3 d1gm5a4 d3dina4 d3dina3 d1q0ua\_ d1w36c1 d1z3ix1  
d1nkta3 d1nkta4 d1uaaa2 d1w36d2 g1qhh.1 d2fwra2 d2fwra1 d2fkza\_  
d1zujal d1s3qa1 d2fjca1 d1z6om1 d1veia\_ d4dyya\_ d1jiga\_ d3gvya\_  
d2pyba\_ d4cy9a1 d3bvfa1 d1r03a\_ d2cf7a\_ d1nf4a\_ d1zs3a1 d4iwka\_  
d3ka8a\_ d3np0x\_ d1n1qa\_ d1lb3a\_ d4e6ka\_ d1z6oa1 d2fzfa1 d4dyua\_  
d3ge4a\_ d1jgca\_ d4am4a\_ d2z6ma\_ d1ji5a\_ d1vlga\_ d1lkoa1 d1krqa\_  
d3qz3a\_ d1o9ra\_ d2ffxj\_ d1euma\_ d1yv1a1 d2v2pa\_ d1j30a\_ d4di0a\_  
d1dpsa\_ d1k8rb\_ d1wgra1 d1ef5a\_ d1wfyal d1wgya1 d1l1fda\_ d2cs4a1  
d1wxma1 d2byea1 d3kh0a1 d2byfa1 d1wxaa1 d1e7ua3 d1wgda1 d1wggal  
d4q5eb\_ d1wjna1 d3n3kb\_ d1wz0a1 d1we6a1 d2m0xa\_ d2gbka\_ d3rt3b1  
d1wh3a1 d1sifa\_ d2ekec2 d4ii2b1 d4hk2a1 d1c3ta\_ d1m94a\_ d1wghal  
d1ttna1 d1j8ca\_ d1wx8a1 d3v6cb1 d2ma9b\_ d4i61b1 d1bt0a\_ d2jvca1  
d1iyfa\_ d2k1fa\_ d1wxva1 d1wf9a1 d1t0ya\_ d2io0b2 d1x1ma1 d2gbma\_  
d1zw7a1 d2m17a\_ d1ud7a\_ d1we7a1 d2lwpa\_ d2gbja\_ d1wjua1 d1v6ea1  
d1v86a1 d4eewa\_ d1wiaa1 d4icva\_ d4gu2a\_ d1wx7a1 d1wy8a1 d4hjka1  
d2faza1 d1v5oa1 d3ruib\_ d1eo6a\_ d3waob\_ d2r2qa1 d3m95a\_ d3wana\_  
d1yvca1 d1yeza1 d3h33a\_ d1rwja\_ d19hca\_ d1os6a\_ d3bxua\_ d3h4na\_  
d1i77a\_ d3caoa\_ d1j0pa\_ d2ctha\_ d1duwa\_ d1ofwa\_ d2e84a\_ d1hh5a\_  
d1gyoa\_ d3h34a\_ d1dszb\_ d1a6ya\_ d3cbba\_ d1ynwa1 d1r4ia\_ d1hcqa\_  
d2hana\_ d2hanb\_ d2enval d1kb4b\_ d2n11b\_ d1l01a\_ d1cita\_ d1lum8a\_  
d1lixza\_ d1qvra2 d1qvra3 d1qzma\_ d1sxjc2 d1jr3d2 d2p65a\_ d1l8qa2  
d3hu3a3 d1sxjd2 d1njfa\_ d1in4a2 d1sxja2 d1tuea1 d2ce7a2 d1w5sa2  
d1sxjb2 d1d2na\_ d1ny5a2 d1ofha\_ d2gnoa2 d2a5yb3 d1fnna2 d1u0ja1  
d1lv7a\_ d1liqpa2 d2fnna2 d1lixsb2 d4gita\_ d1sxje2 d1g41a\_ d1mbma\_  
d3su6a1 d1cula1 d4agka\_ d1vcpa\_ d1q31a\_ g1n11.1 d3e90b\_ d1ep5a\_  
d3u1jb\_ d2e3fa\_ d1mm0a\_ d2e3ea\_ d2l1da\_ d2ny8x\_ d2e3ga\_ d2ny9x\_  
d2nz3a\_ d2l1j7a\_ d2m8bb1 d2kyqa\_ d3psma\_ d1jkza\_ d1jxca\_ d2g11a\_  
d1ugla\_ d4uj0a\_ d2k4ua\_ d1hp2a\_ d2lu9a\_ d1baha\_ d2meoa1 d1wm7a\_  
d1hlya\_ d1n8ma\_ d1jlza\_ d1wpda\_ d1c55a\_ d1pvza\_ d1wt7a\_ d1rjia\_  
d1wz5a\_ d1m2sa\_ d1pjva\_ d1qkya\_ d2ktca1 d1wmta\_ d1du9a\_ d1j5ja\_  
d1r1ga\_ d1xwdc1 d3kj4a\_ d1ozna\_ d1w8aa\_ d2ifga3 d1xkua\_ d1t0za\_  
d2i61a\_ d1t1ta\_ d1sn4a\_ d1kv0a\_ d2lkba\_ d1npia\_ d1wwna\_ d1pe4a\_  
d2kbka\_ d2li7a\_ d2kbha\_ d1dq7a\_ d1sega\_ d1omya\_ d1zywa1 d1jzaa\_  
d1n9wa1 d1bbua1 d1e1oa1 d1c0aa1 d1l0wa1 d3a74a1 d1eova1 d1t61c1  
d1iyjb4 d1iyjb5 d1iyjb3 d1o7ia\_ d4ipca1 d1x3ea\_ d4apva\_ d1jb7a1  
d1jb7a2 d1jb7a3 d3kdfa\_ d1ue1b\_ d1wjja1 d3eiva\_ d1xjva2 d1xjva1  
d2ccza2 d1se8a\_ d1l1loc\_ d1jb7b\_ d1qvca\_ d3ulla\_ d1qzga\_ d1mia5

d1miua3 d1y14b1 d2nn6i1 d1i94l\_ d2zjra2 d1smxa\_ d2qamc2 d1hh2p1  
d2r7da1 d1rl2a2 d1wfaq1 d3bzka4 d1x6oa2 d3a0ja\_ d2j01d2 d2ja9a1  
d4q15a\_ d1hr0w\_ d1luza\_ d2n3sa\_ d2vnud1 d1h95a\_ d1go3e1 d2nn6h1  
d1ne3a\_ d2mola\_ d1liz6a2 d1jjga\_ d1e3pa2 d2ix0a3 d2ix0a2 d2lxja\_  
d1ueba3 d1ueba2 d2z0sa1 d1u0la1 d2ix0a1 d2eifa2 d2je6i1 d3i2za1  
d2c35b1 d2ahob2 d1t9ha1 d3i4oa\_ d2qall1 d1jt8a\_ d2nn6g1 d1g6pa\_  
d3cama\_ d1i94q\_ d1c9oa\_ d1d7qa\_ d2ba0a1 d2vnud2 d2vnud3 d1khia2  
d2qalq1 d1wi5a1 d1xtda2 d1ny4a\_ d1fvia1 d1ckma1 d1p16a1 d1x9na2  
d1pfsa\_ d2a1ka\_ d1ohea1 d1ohea2 d2f4da\_ d1rxda\_ d2hxpa\_ d1xria\_  
d1d5ra2 d1fpza\_ d3ezza\_ d4y2ea\_ d1i9sa\_ d3azya\_ d3wvja\_ d1upsa1  
d1ajoa\_ d2hyka\_ d2vy0a\_ d1o4ya\_ d3o5sa\_ d3d6ea\_ d3atga\_ d1dypa\_  
d1umza\_ d3i4ia\_ d41bqa\_ d1a78a\_ d1slta\_ d4no4a\_ d3zsja\_ d3duia\_  
d1g86a\_ d1is3a\_ d1qmja\_ d1hlca\_ d1tdha3 d1q3ba3 d1ee8a3 d1k82a3  
g1qmo.1 g1len.1 d3zyra\_ d1fnya\_ d1n47a\_ g21tn.1 d1avba\_ d3usua\_  
d1dhkb\_ d1f9ka\_ d1ukga\_ d1g8wa\_ d1g9fa\_ d1wbfa\_ d3wcsa\_ d1g7ya\_  
g1loe.1 d1mvqa\_ d1hq1a\_ d1v6ia\_ d1dbna\_ d1fx5a\_ d4l8qa\_ d1ioaa\_  
d3n35a\_ d3ubra\_ d1qo8a1 d1d4ca1 d2k3va\_ d1ft5a\_ d1qdba\_ d1mlqa\_  
d2j7aa\_ d1h21a\_ d1ogyb\_ d4fasa\_ d1oaha\_ d1sp3a\_ d2h0ba\_ d2erfa\_  
d1h30a2 d1h30a1 d3mw4a1 d1pz7a\_ d2r1ba\_ d3v64a1 d1d2sa\_ d3bopa1  
d3mw3a1 d1okqa1 d1okqa2 d1wioa4 d1ccza2 d1vcaa1 d1ic1a1 d2d9qb1  
d2nxyb2 d1adqa1 d1fnga1 d1uvqb1 d1zs8a1 d2vola1 d2vola2 d1mfb12  
d2jelh2 d1uwel2 d3qq4b1 d1kjbv\_ d1k5na1 d1osph2 d4odh12 d1ow0a1  
d1ow0a2 d1bfob2 d3l9ra2 d3jtth1 d2fath2 d4elkb2 d1fn4b2 d2xfxb\_  
d1pg7x2 d1cqka\_ d4k71b2 d1lk2a1 d1eapb2 d4lfhg2 d1i4fa1 d2nw2a2  
d1kfah2 d1mhca1 d1h3ua1 d1wejh2 d1h0db2 d1a5fh2 d1kcvh2 d1mjuh2  
d1qqda1 d1kcrh2 d1k8ia1 d3huja2 d2nnab1 d1nfd2 d3mffb2 d1s9va1  
d1lk3h2 d1q0x12 d1fv1b1 d1neza1 d4rfeb2 d1r3ha1 d1a6tb2 d1kjva1  
d1pz5b2 d1onqa1 d2bc4a2 d1de4a1 d1k8da1 d1tcra2 d1dn0b2 d1nfde2  
d2xwtb2 d1bfoa2 d1mexh2 d1iakb1 d1ypzf2 d4f7ea2 d1q7212 d2fbjh2  
d1fe8h2 d1clzh2 d1fngb1 d1uvqa1 d1vgka1 d1c16a1 d4j12a2 d4x99b2  
d1igtb3 d1je6a1 d1q72h2 d1nldh2 d1teth2 d2hmic2 d1ilca2 d1ilca1  
d1k8ib1 d1q0yh2 d1kfa12 d3frua1 d1pg7w2 d1u58a1 d1igyb4 d1igyb3  
d1hyrc1 d1klub1 d1deeb2 d1c12b2 d2bc4b2 d1kcv12 d3wn5b1 d1lk2b\_  
d1lk312 d1mjul2 d1sm3h2 d1q0xh2 d1zvsal d1ydpal d1u8ib2 d1ypze2  
d1kcu2 d1op9a\_ d1y0la1 d1letzb1 d1legj11 d2gsib1 d1nj9a1 d4jfhd1  
d1aqk11 d1t2ja\_ d1lo4h1 d1zvya1 d3v4v11 d4enec1 d1kxtb\_ d5e8ea1  
d2pxya\_ d4weud\_ d1xiwc\_ d2esvd1 d1qznh\_ d1ogae1 d1f4xh1 d4n1hb\_  
d3ezjb1 d3mlw11 d1kfah1 d1etza1 d1b4jh1 d3cfic\_ d4w68a\_ d2arja1  
d1ek3a\_ d2ok011 d1vera\_ d1uwgh1 d1blnb1 d1fpth1 d1rzga1 d2giya1  
d4m3kb1 d1nc2a1 d2nyyd1 d1ncna\_ d1fbih1 d5dxwa\_ d4fqqa1 d1dqdh1  
d1jfq11 d1kelh1 d1faih1 d1frgl1 d1figl1 d4m6n11 d1fo0a\_ d4hxb11  
d3b5ga\_ d3quyd1 d2h9gb1 d1i8kb\_ d2dd8h1 d2ck0h1 d1eaja\_ d4w6wb1  
d2a6ib3 d1t66d1 d2e27h\_ d1ob1b1 d1f11b1 d2v7na1 d1ad0a1 d2xt1b1  
d1pskh1 d4i13b1 d2op411 d1a0q11 d1uwel1 d1za3a1 d1ncb11 d4uu9a\_

d1bm3h1 d1cloh1 d1nqba2 d1cf8h1 d4y5va\_ d1mhph1 d5anma1 d4cdgc1  
d4ldeb\_ d1y0lb1 d2pcpb1 d1z3gl1 d1dfb11 d1fh5h1 d3g5xa1 d1tzib1  
d4dn3l1 d3zhka1 d2b1hh1 d2uyla1 d1f3dh1 d1nj9b1 d2agjh1 d2h1pl1  
d1q72h1 d8fabbb1 d1ndmb1 d1rjca1 d4u6hb1 d3upca\_ d2fbj11 d1osph1  
d1tvda\_ d2cjev\_ d4fhbd1 d1bd2d1 d1rz7h1 d3nn8a\_ d1blna1 d1knoa1  
d1nfdal d2bmkb1 d1dq11\_ d1igyb1 d1igf11 d12e8h1 d3utza1 d1nc2b1  
d1rihh1 d4mwfb1 d4jvpa1 d1mieh1 d1rhfa1 d1fgn11 d1sbsh1 d1lp9e1  
d1dn0a1 d4lqf11 d1iaih1 d1kgcd1 d1mh5b1 d1gpol1 d2g60h3 d1f8t11  
d2jixd1 d4grwh\_ d1fo0b\_ d1bfob1 d1axsa1 d1u9ka\_ d1nmbh\_ d1h8na1  
d1h8na2 d1jguh1 d4eura1 d3sdy11 d35c8h1 d1w7211 d1mvub\_ d1i9rh1  
d1ob1a1 d4wenb\_ d1yeeh1 d3ietc1 d1f58h1 d1ad0b1 d1mqk1\_ d1nbvh1  
d4b50a\_ d3r8bb\_ d1baf11 d1mamh1 d4rgne1 d2gsgb\_ d35c811 d1bafh1  
d1ai1h1 d2pcpa1 d2fath1 d2x1pa\_ d1orsb1 d1ibgl1 d1shma\_ d1a2yb\_  
d1u0qa\_ d2coqa\_ d1hilb1 d1qfwi\_ d1jv5b\_ d1fn4b1 d5e0qa\_ d1nsnh1  
d1plgl1 d4ocxl1 d1kb5h1 d1rzfh1 d1pg7x1 d2fx7h1 d2oi9c\_ d1l7i11  
d3eyva1 d1d5i11 d4ffyl\_ d1tet11 d1a6wh\_ d1ac6a\_ d3dvfa\_ d1nfdel  
d1mimh1 d1ri8a1 d1jhlh\_ d3dura\_ d1fskb1 d1f97a1 d3so3b1 d2ak4d1  
d1lp9f1 d4z7wf1 d1l7th1 d4y5ya\_ d4x7ec1 d1emth1 d1ikf11 d1nlbh1  
d4utal1 d1bjma1 d1eapb1 d1u6ah1 d2dtgd1 d1kj2b\_ d1xeda1 d1cleh1  
d1fgvh\_ d2bnub1 d2fb4h1 d2dtgb1 d1ktrh\_ d1jpth1 d1qkz11 d4hepg\_  
d2atpb1 d1flrh1 d2hrpl1 d1mvfa\_ d1iaim1 d3k80a1 d2jb5h1 d3zkxc\_  
d4grwe\_ d1it9h1 d1rhhb1 d3w9ec\_ d1e4wh1 d1sy6h1 d2j6eh1 d3qxta\_  
d1jglh1 d1p7ka1 d1tzhb1 d4n8pa1 d1gaf11 d2jelh1 d1wioa2 d4i0cc1  
d1cicb1 d1lmka2 d1lmka1 d1iqwh1 d1orqb1 d1ejoh1 d1jnlh1 d4zg1a\_  
d43c9b\_ d1ggbl1 d1wejh1 d3q6fa1 d1f3dj1 d3c6la1 d1bqlh1 d3p9wb\_  
d1a3r11 d1h0db1 d2uzil\_ d1eo811 d1qfw1\_ d1n7ml1 d1igja1 d1c5ch1  
d2a9mh\_ d1rmfh1 d1fj1b1 d4heme\_ d1ccza1 d1a5fh1 d1ogad1 d1dlfh\_  
d1qa9b\_ d1vge11 d3qskb\_ d1sjxa\_ d4ozfg1 d1sq2n\_ d1qd0a\_ d1kevh1  
d1c5db1 d3qcul1 d8faba1 d3bn9d1 d1mjuh1 d4y8dc\_ d7fabh1 d3dvgb1  
d1l0011 d1a6tb1 d1gigh1 d1kcrh1 d2hwhz11 d1yjdc1 d3clfl1 d4krna\_  
d1dl71\_ d1e6o11 d1mexh1 d3r0ma\_ d4kkna\_ d1fnsl1 d1loaqh\_ d1rzial  
d1ucbh1 d1ncw11 d4b41a\_ d1nfdfl d2mpah1 d2d7t11 d4grwf\_ d4b5ea\_  
d1lk3h1 d3u79a\_ d4u3xa\_ d1ghfl1 d1bvkb\_ d1mcww1 d1b88a\_ d1jrhh1  
d32c2b1 d4wemb\_ d1dsfh\_ d1op3h1 d1cell1 d1iqda1 d1qoka1 d1qoka2  
d1qfuh1 d2crya1 d1ay1h1 d1oaql\_ d3ab0b\_ d1rur11 d1t4kb1 d1bz7b1  
d1n0xh1 d1for11 d1lucb11 d4w6yb\_ d43c9a\_ d2aab11 d1tzial d4n1ca\_  
d1k6qh1 d3g9ab\_ d4tvsa1 d1igmh\_ d1pz5b1 d3dx9a1 d3wxwh\_ d1nakh1  
d1kcul1 d3eaka\_ d4qlra1 d1cr911 d1d9ka\_ d1f4x11 d1deea1 d2i27n2  
d1c12a1 d2orb11 d1j8hd1 d1mcph1 d1c5da1 d1kenh1 d1bd2e1 d1h5ba\_  
d4x7fc1 d3upaa\_ d1t3fa1 d1indh1 d2dtgc1 d4hc111 d1zv5a1 d4wgvb\_  
d1uwgl1 d4f37k1 d1aqkh1 d1vesa\_ d3zkqd\_ d1fpt11 d1l0411 d1knob1  
d3rrqa\_ d1ct8b1 d4orz\_ d1mlbb1 d4hgkc1 d1dqd11 d1bogb1 d4ozhe1  
d1dr9a1 d1i7za1 d1dn0b1 d1kell1 d1rzib1 d1ypzf1 d1wtla\_ d1hkfa\_  
d1fail1 d1figh1 d2vyre\_ d1sjva\_ d1ohqa\_ d1bfoa1 d1pkqb1 d1mjul1

d1b4j11 d1nsn11 d2arj11 d1p4bh\_ d4aj0a\_ d3nn8b\_ d2rcja1 d1f2xk\_  
d4v1dd\_ d1adqh1 d2eksa\_ d4k3ga\_ d1jfqh1 d1uweh1 d1frgh1 d4gftb\_  
d1uz8b1 d4n1ea\_ d1bm311 d1c1o11 d3mcka1 d2vq1a1 d1ae6h1 d4aq1b1  
d1uj3b1 d1nbqa1 d1fh511 d2ck011 d2ywza\_ d1q7211 d4nbxb\_ d1hila1  
d4hz1b1 d2j8811 d1zmya1 d1cd0a\_ d1a4ka1 d1psk11 d1a0qh1 d4krmb\_  
d1ncbh1 d2fbjh1 d1j8he1 d1i3ua\_ d1cf811 d1fe8h1 d2plya1 d1eeqa\_  
d2x89a\_ d1o10a\_ d2r0lh1 d1ub5a1 d1dfbh1 d3eyvb1 d4jdvb1 d4p2cg\_  
d2gsia1 d2agj11 d1u3ha1 d2h1ph1 d1rih11 d1fskc1 d1boga1 d2a7711  
d1osp11 d1qfoa\_ d3dwta\_ d2fx711 d1rz711 d3stba1 d1pkqa1 d1b6da1  
d1dzba2 d1dzba1 d1kj2a\_ d4l1ha\_ d1rzgb1 d1dq1h\_ d12e811 d1mie11  
d1jmaa\_ d1sbs11 d1fgnh1 d1f5811 d1mqkh\_ d1ndgb1 d3qeg11 d1ia111  
d2aw2a1 d1tqbc1 d3fo2a1 d4dkaa\_ d1f8th1 d2g6011 d2ywya\_ d1uj3a1  
d1yc7a\_ d3bd3a\_ d4w6xb1 d1nmb1\_ d1i8ka\_ d1rj1b1 d1ypze1 d1p7kb1  
d1kxqe\_ d1gpoh1 d2z4qa1 d1w72h1 d1i9r11 d4qgya1 d4xt1c\_ d2qqnh1  
d1cica1 d3c08h1 d2cd0a\_ d2bdnh1 d1hnga1 d1mam11 d1nldh1 d1cr9h1  
d4lcih1 d3bkyh1 d3qg711 d1ai111 d1kxvc\_ d4iosd\_ d1l7ih1 d2x1qa\_  
d1ub6b1 d3k74b\_ d1ibgh1 d1teth1 d1igya1 d1hxma1 d2x6ma\_ d2e71a\_  
d5e03a\_ d1qfwm\_ d2r0kh1 d1igj11 d1rurh1 d1plgh1 d1mj8h1 d1yuhb1  
d3fmg11 d1rzf11 d1emt11 d1ad9b1 d1igtb1 d1nlb11 d1d5ih1 d3k7ua\_  
d4ffyh\_ d1bwwa\_ d3dvga1 d1a6ta1 d1fgv1\_ d4qxg11 d1mim11 d1jh11\_  
d2hffb1 d2hh011 d1qkzh1 d1l7t11 d1afvh1 d1iaii1 d2cjuh\_ d1um5h1  
d2ghwb2 d2ghwb1 d1kgce1 d2fgwh1 d1ikfh1 d1dvfd\_ d2i24n1 d2xtjb\_  
d1za3b1 d2yc1a\_ d2hh0h1 d2x1oa\_ d1bvka\_ d1rj1a1 d5e7ba1 d1igta1  
d1i11b1 d2fb411 d1mvua\_ d1jpt11 d32c2a1 d1fvca\_ d1iqdb1 d2hrph1  
d2p4ab\_ d4qo1a\_ d1p2cb1 d1wt5c\_ d1t4ka1 d5c1mb\_ d1it911 d1bz7a1  
d1b2wh1 d1e4w11 d1jn111 d1yedb1 d1za6b1 d3u7aa\_ d1igfh1 d3gnm11  
d1orsa1 d1wejl1 d1a2ya\_ d1hxmb1 d1gafh1 d2j4wh1 d1pz5a1 d1j05a\_  
d1a3rh1 d4fq111 d1qfwh\_ d1eo8h1 d1n7mh1 d4s11a\_ d1kegh1 d5da4a\_  
d1iqw11 d3whxb1 d1vgeh1 d1deeb1 d1c12b1 d1t2q11 d1ad9a1 d3gsnb1  
d3b2uc1 d1ggbh1 d1t3fb1 d1nak11 d4ocmc\_ d1lila1 d2v7hb3 d2esve1  
d1mcoh1 d2qr0b1 d2q3aa\_ d1ct8a1 d1kcr11 d2pxyb\_ d2uzih\_ d5c3ld\_  
d3durb\_ d1c5c11 d2ak4e1 d1d17h\_ d1xiwd\_ d1mlba1 d1rmf11 d1i7zb1  
d1dlf1\_ d2xa3a\_ d5bq7b1 d1dqqb1 d3h4211 d1egjh1 d1kcv11 d1fe811  
d2j6e11 d1f3rb2 d1l1k311 d1sm3h1 d1q0xh1 d1ghfh1 d7fab11 d1igch1  
d1lo0h1 d4idla\_ d5c2b1\_ d1jrh11 d1l11a1 d3zhda1 d4kfzc\_ d1b0wa\_  
d1e6oh1 d1mex11 d4krpb\_ d1fnsh1 d1ncwh1 d4hgma\_ d4eigb1 d4rzca\_  
d2mpa11 d4y5xa\_ d5en2b1 d3lrga1 d4ej1c1 d1rhha1 d1j05b\_ d1forh1  
d1q9wb1 d2wzpd\_ d2aq2a1 d1h0da1 d3revb1 d2ij0c1 d1tzha1 d4m7j11  
d1k6q11 d3b9kc1 d1igml\_ d3qeua1 d1dsfl\_ d1celh1 d1kcuh1 d1zvha1  
d1zvoa1 d1tqbb1 d1ay111 d2qscl1 d2cgrh1 d1nl0h1 d1ken11 d3eo0a1  
d4n9ob1 d1n0x11 d3k1kc\_ d1c4qa\_ d1prtc1 d2wv6d\_ d1prtf\_ d1l1trd\_  
d4l63b1 d1r4pb\_ d1prtd\_ d1t10f\_ d2bosa\_ d1prtb1 d2aq2b1 d1ck1a1  
d1lenfa1 d1i4pa1 d1v1oa1 d1et9a1 d1esfa1 d2g9hd1 d4ohja1 d1klud1  
d1bxta1 d1eu3a1 d1ty0a1 d1fnua1 d2cqva1 d1fhga\_ d2k1ma\_ d2d12a1

d1biha3 d1biha1 d1biha4 d3qp3a1 d1g1ca\_ d1gxea\_ d1cvsc2 d1cvsc1  
d1xmwa2 d1m4ka2 d2otpa2 d1biha2 d1rhfa2 d2fcba2 d2fcba1 d1wwbx\_  
d1gsm2 d1lepfa1 d1lepfa2 d2dava1 d1waaa\_ d1f97a2 d1x44a1 d1vcaa2  
d1fnla2 d1fnla1 d3b5ha2 d3h8na2 d3h8na1 d1jbja1 d1jbja2 d1pd6a\_  
d1f2qa2 d1f2qa1 d3cx2a\_ d1nbqa2 d3b5ha1 d1n26a1 d1xiwb\_ d1xaua\_  
d1fltx\_ d2ifga1 d1olla1 d1olla2 d1cs6a4 d1cs6a3 d1cs6a2 d1cs6a1  
d2gw5a2 d1sy6a1 d1xiwa\_ d1lucta2 d1lucta1 d1ry7b2 d1gl4b\_ d1qz1a3  
d1olza1 d2c9aa1 d1wwca\_

**Family-37 (b.50.1.2)**

**Positive dataset contains 9 protein sequences.**

d2qzxa\_ d2asia\_ d2h6ta\_ d3hd8a\_ d4aa9a\_ d1t6ex\_ d1wkra\_ d1tzsa\_  
d2qzwa\_

**Negative dataset contains 4045 protein sequences.**

d1m32a\_ d1libja\_ d1c7na\_ d1liuga\_ d4q75a\_ d2bkwa1 d1t3ia\_ d1n8pa\_  
d1qz9a\_ d1jff9a\_ d1eg5a\_ d1p3wa\_ d3kgwa\_ d1c11a\_ d2ctza1 d2rfva\_  
d1gc0a\_ d1cs1a\_ d1d2fa\_ d2ch1a1 d1qgna\_ d1pffa\_ d1elua\_ d2xlba\_  
d3m83a1 d1u08a\_ d1lc5a\_ d1b5pa\_ d2ay1a\_ d1bw0a\_ d3pd6a\_ d7aata\_  
d2csta\_ d1j32a\_ d1fg7a\_ d4wlha\_ d1o4sa\_ d1v2da\_ d1gdea\_ d1m6sa\_  
d1v72a1 d1svva\_ d1ajsa\_ d1wsta1 d2f8ja2 d1lk9a\_ d1vp4a1 d1xi9a1  
d2gb3a1 d1yaaa\_ d2cfba1 d1dfoa\_ d1o69a\_ d1bj4a\_ d3k28a\_ d2bwpa\_  
d3lg0a\_ d2fnua\_ d3ou5a\_ d1z7da1 d1iaya\_ d4msoa\_ d1bs0a\_ d1s0aa\_  
d1sffa\_ d3tqxa\_ d1mdoa\_ d3qboa\_ d3pgya\_ d1bjna\_ d2dkja\_ d1ejia\_  
d1vefa1 d4wxga\_ d3bs8a\_ d3gbxa1 d1w23a\_ d1qnia1 d1libya\_ d1f56a\_  
d1bypa\_ d1azca\_ d1ws8a\_ d3u25a\_ d1cuoa\_ d1id2a\_ d1rkra\_ d2iaac\_  
d4dplx\_ d1nwpa\_ d2gima\_ d2i7sa\_ d1qhqa\_ d3ehbb1 d1fftb1 d1hfua2  
d1kbva1 d1kbva2 d1sdda1 d1sdda2 d1gyca1 d1gyca2 d1mzya1 d2bw4a1  
d1aoza1 d1aoza3 d1aoza2 d1kyaa2 d1kyaa3 d1kyaa1 d1mzya2 d4e9sa1  
d1sddb1 d1sddb2 d1hfua1 d1hfua3 d1oel1a2 d1oel1a1 d1v10a2 d1v10a3  
d1v10a1 d2dara2 d2dara1 d1wyha2 d2dloa2 d1rutx4 d1rutx3 d2cuqa2  
d1x41a2 d1x41a1 d1x3ha2 d1x3ha1 d2d8za1 d1x61a2 d1x6aa1 d1x6aa2  
d2cora2 d2cora1 d1v6ga1 d1v6ga2 d2d8za2 d1x64a1 d1x64a2 d1b8ta1  
d2co8a1 d1x63a2 d2dj7a2 d2dj7a1 d2cu8a2 d2cu8a1 d1g47a2 d1g47a1  
d1j2oa1 d1wyha1 d2dloa1 d1wiga1 d1wiga2 d2cupa2 d2cupa3 d1x68a1  
d2d8ya2 d2d8ya1 d1x62a1 d1x68a2 d1x61a1 d1b8ta3 d1b8ta2 d2d8xa2  
d2d8xa1 d1x4ka1 d1x4ka2 d2cuqa1 d1m3va1 d2co8a2 d1j2oa2 d1x63a1  
d2cura1 d2cura2 d1x62a2 d3sxwa1 d4luka\_ d2bema\_ d1pama1 d1ea9c1  
d1qhoa1 d2fhfa2 d2fhfa1 d1k3ia1 d1j0ha1 d1cxl1a1 d2bhua1 d1ledqa1  
d1f1sa2 d1ut9a2 d1gvia1 d1txka1 d4alac\_ d1rera1 d1s6na\_ d3uzqb\_  
d1jgta2 d1ofda3 d1ea0a3 d1ecfa2 d1ct9a2 d1ao0a2 d1te5a\_ d1lep0a\_  
d2pa7a1 d1wlta1 d1nxma\_ d2c0za1 d1nepa\_ d1ds6b\_ d1fstb\_ d1ex0a1  
d1g0da1 d4w9ta\_ d4x2ra1 d1ka9f\_ d1qo2a\_ d4axka1 d1thfd\_ d1h5ya\_  
d4u28a\_ d2y88a\_ d4wd0a\_ d1vzwa1 d1tafa\_ d1bh9b\_ d1tafb\_ d1jfib\_  
d1h3ob\_ d2byka1 d1n1ja\_ d4g92b\_ d1bh9a\_ d1jfia\_ d1h3oa\_ d2bykb1  
d1n1jb\_ d2bjca1 d2hsga1 d1qpza1 d1ydw2 d2nvwa2 d1h6da2 d1zh8a2

d1qkia2 d1xeaa2 d1t1ta2 d2ovga\_ d1sq8a\_ d1rzsa\_ d3kz3a\_ d3orca\_  
d2q49a2 d1hdgo2 d2g17a2 d2cvoa2 d2czca1 d3pwka2 d1obfo2 d1i32a2  
d1zyao2 d2pkqo2 d1b7go2 d2hjsa2 d1cf2o2 d1vkna2 d1nvmb2 d1ux8a\_  
d4i0va\_ d2bkma\_ d1dlwa\_ d2bmma\_ d2msya\_ d2djoa1 d2r5za\_ d1au7a1  
d1f43a\_ d2lmda1 d1akhb\_ d1s7ea1 d3nara\_ d1zq3p1 d2craa1 d1mija\_  
d4uuta\_ d3a01a\_ d1x58a1 d3rkqa1 d3cmya1 d2cqxa1 d2da6a1 d1e3oc1  
d1fj1a\_ d1mh3a1 d1ig7a\_ d1x41a1 d1wh7a1 d1gt0c1 d2mw8a\_ d1lfup\_  
d1x2ma1 d1b72a\_ d1wi3a1 d1jgga\_ d1wjha1 d1x2na1 d1mnmc\_ d2cuea1  
d3k2aa\_ d2hosa\_ d2jwta2 d1pufa\_ d1oetc1 d2hi3a\_ d1b8ia\_ d4j19a\_  
d3lnqa\_ d1wh5a1 d1b8ib\_ d1fexa\_ d2cqra1 d1ug2a1 d2cqqa1 d2ajea1  
d4a69c\_ d1h8ac1 d2crga1 d2iw5b1 d1xc5a1 d1ofcx1 d2cu7a1 d1wgxa1  
d2cjj1a1 d2ckxa1 d1gvda\_ d1tc3c\_ d1gdta1 d1u78a2 d1xg1a1 d1hlva1  
d1hlva2 d1iufa2 d1iufa1 d2iu5a1 d1zk8a1 d2g7sa1 d2fd5a1 d2np5a1  
d1z0xa1 d2id6a1 d2d6ya1 d2i10a1 d1vi0a1 d2oi8a1 d3c07a1 d2ns7a1  
d2fq4a1 d2yvea1 d1t33a1 d2o7ta1 d1rkta1 d2np3b1 d2g7ga1 d2gena1  
d2fbqa1 d2g71a1 d2gfna1 d2g3ba1 d2jj7a1 d2hyja1 d1sgma1 d1ui5a1  
d2hkua1 d2id3a1 d4jyka1 d1b10a1 d1b10a2 d1d5ya1 d1prt2 d3lv8a\_  
d1s3ga1 d1zaka1 d1s4qa\_ d3tvta2 d1uf9a\_ d1khta\_ d1ckea\_ d1losna\_  
d1p5zb\_ d4tmka\_ d3cm0a\_ d1tmka\_ d1jaga\_ d3h86a\_ d1t0hb\_ d1nn5a\_  
d2h92a\_ d3kb2a1 d2c95a1 d1yj5a2 d1kgda\_ d1ly1a\_ d2ak3a1 d1vyva2  
d1deka\_ d2grja1 d1p3ja1 d1y63a\_ d1e4ya1 d1s96a\_ d3iija1 d1lvga\_  
d1nksa\_ d1vyua2 d4e22a\_ d1qf9a\_ d1jjva\_ d1q3ta\_ d1ki9a\_ d1lw7a2  
d1teva\_ d1kjwa2 d1gsia\_ d1x6va3 d1g3ma\_ d1j99a\_ d1t8ta1 d1nsta\_  
d1fmja\_ d1zrha\_ d1ls6a\_ d2a3ra\_ d2zptx\_ d3ckla\_ d1texa\_ d1q44a\_  
d2gwha\_ d1odfa\_ d1uj2a\_ d4gi7a\_ d2jeoa1 d1rz3a\_ d1k6ma1 d1z0ja1  
d3umra2 d3gj0a1 d2gaoa1 d1yzga1 d1x3sa1 d1g7sa4 d1puja\_ d1udxa2  
d1kk1a3 d2o52a\_ d1jwyb\_ d1zcaa2 d1zcba2 d2fv8a1 d2cjwa\_ d3dz8a1  
d1xzpa2 d1vg8a\_ d4qxaa\_ d2ew1a1 d1x1ra1 d2bcgy\_ d3doea1 d3cona\_  
d3rega\_ d3wyga\_ d1upta\_ d2b6ha1 d1zd9a1 d1lnza2 d1r5ba3 d1n0ua2  
d1r2qa\_ d2f91a1 d2rhda\_ d3q3jb\_ d3q85a\_ d1efma1 d1r8qa\_ d2gf9a1  
d2akab1 d1ek0a\_ d1z08a1 d2gcoa1 d2dy1a2 d4g01b\_ d2cxa1 d1svia\_  
d3q72a\_ d1ni3a1 d4ac9a4 d2erxa1 d2bmea\_ d1wxqa1 d2gf0a1 d4ldja1  
d1zunb3 d1d5ca\_ d4lv5b\_ d1efca3 d1kmqa\_ d2g6ba1 d3lrpa\_ d1tada2  
d2y8ea\_ d4rd4a1 d1z06a1 d2heia\_ d3a58b\_ d1u01a2 d1d2ea3 d1zj6a1  
d2ocba\_ d3rwoa\_ d1mr3f\_ d2e9sa1 d4u5xa1 d2iwra\_ d2fn4a1 d3bwdd\_  
d2nzja1 d2atva1 d2ksqa\_ d3l43a\_ d1mkya2 d1mkya1 d1wmsa\_ d1jnja3  
d2rmka\_ d1f6ba\_ d1f60a3 d1gota2 d1jala1 d2fh5b1 d1g16a\_ d2wblc\_  
d1m7ba\_ d1wf3a1 d1f5na2 d1t9ha2 d1z6xa1 d1z0aa1 d2fg5a1 d2a5ja1  
d2bcjq2 d1s0ua3 d1ky3a\_ d4y0va\_ d4lhwa\_ d2qmea1 d2atxa1 d1legaa1  
d1ryha\_ d1moza\_ d1nrjb\_ d2erya1 d3bfka\_ d1puia\_ d3j3az1 d3t5ga\_  
d1shza2 d3defa\_ d2f7sa1 d3raba\_ d3tsoa\_ d3aq4a\_ d2a17a1 d3sfva1  
d3bc1a\_ d2ncda\_ d1sdma\_ d3h4sa1 d2heha\_ d2grya\_ g3kin.1 d1kk8a2  
d1br2a2 d1goja\_ d1f9va\_ d2mysa2 d1lkxa\_ d3t0qa\_ d4db1a1 d3gbja\_  
d1ry6a\_ d1v8ka\_ d1k8ka2 d1k8ka1 d3uleb1 d3i33a2 d3i33a1 d1bupa1

d1dkgd2 d1dkgd1 d4ci6a2 d1jcf1a1 d4a2ba2 d2fxua1 dlyaga2 dlyaga1  
d4cbua2 d1bupa2 d3vrda1 d3vrda2 d1fcdc2 d1h1oa2 d1h1oa1 d1m70a2  
d1m70a1 d1liqca2 d1liqca1 d1eb7a1 d1nmla2 d1nmla1 d1hroa\_ d4gedb\_  
d3zooa\_ d1mz4a\_ d1lgu2a\_ d1f1fa\_ d1dvva\_ d1c6ra\_ d1c75a\_ d1e29a\_  
d1gdva\_ d1cnoa\_ d1h32b\_ d1co6a\_ d2bh4x\_ d2aiua\_ d5cytr\_ d1jdl\_ a\_  
d1i8oa\_ d2zboa\_ d3dmia\_ d1ls9a\_ d1wvec\_ d2yk3a\_ d3ph2b\_ d1dw0a\_  
d5aura\_ d1ql3a\_ d1qn2a\_ d1f1ca\_ d2nqya\_ d1h4ga\_ d1hixa\_ d1oa2a\_  
d1olra\_ d3b7ma\_ d4h7ma1 d3wp3a\_ d2vgda\_ d1lgoa\_ d3zsea\_ d2nlra\_  
d3wx5a\_ d1oa3a\_ d1pvxa\_ d1m4wa\_ d1f5ja\_ d1oa4a\_ d1ks5a\_ d4ix1a1  
d2ah2a1 d1evsa\_ d1cnt1\_ d1pvhb\_ d1z7ca\_ d1huwa\_ d1bgea\_ d1rhga\_  
d1f6fa\_ d1f45b\_ d1i1rb\_ d1axia\_ d1letea\_ d3tgxb\_ d1scfa\_ d2z3qa1  
d3qb1a\_ d1hula\_ d1m48a\_ d4nkqb\_ d1eera\_ d1v7mv\_ d5e4ea\_ d2o27a\_  
d3b5ka\_ d2psma1 d4zf7a\_ d3uf5a\_ d4x51a\_ d1d9ca\_ d4ypgc1 d3oq3a\_  
d1n1fa\_ d1aula\_ d1wu3i\_ d3bes1\_ d3ux9a\_ d1v8fa\_ d2ejca\_ d3muea1  
d1ihoa\_ d3q12a1 d4dnxa2 d1m8pa2 d1v47a2 d1jhda2 d1x6va2 d3rbaa\_  
d2qtra\_ d1nupa\_ d3l92a\_ d1f9aa\_ d1qjca\_ d2h29a\_ d1vlha\_ d1od6a\_  
d1lw7a1 d1mrza2 d4ruka\_ d2e17a\_ d1liq0a2 d1irxa2 d1r6ta2 d1ivsa4  
d2cyba\_ d1rqga2 d1j09a2 d2yxna\_ d1f7ua2 d1h3fa1 d1ffya3 d2g36a1  
d1nzja\_ d1jila\_ d1n31a\_ d1i61a\_ d1pfva2 d1h3na3 d3n9ia\_ d3sz3a1  
d3sw2a\_ d1moxc\_ d1dx5i3 d1edmb\_ d1aut12 d1aut11 d1nqlb\_ d1dva11  
d1szba2 d1kigl\_ d2y5f1\_ d1ijqa2 d1lgk5a\_ d1gl1sa2 d1nt0a3 d1xdtr\_  
d1lmja2 d1lmja1 d1nzia2 d2wphe\_ d1klil\_ d1pfx12 d1pfx11 d1p9ja\_  
d1gl1ta2 d1f7ea\_ d4yzub\_ d1m1xb4 d1qx2a\_ d1ig5a\_ d2y5ia\_ d1qlsa\_  
d1psra\_ d3n22a\_ d2egda\_ d4ggfc\_ d2wcea\_ d2luca\_ d4aqia\_ d3nsia\_  
d2lp3a\_ d1j55a\_ d1a4pa\_ d1k8ua\_ d1nsha\_ d1pvaa\_ d3fs7a\_ d1ttxa\_  
d1rwy\_ d2kyfa\_ d1rk9a\_ d1a75a\_ d1lexra\_ d1tiza1 d1nyaa\_ d1g8ia\_  
d1ggwa\_ d1wdcc\_ d3fwba\_ d1ggza\_ d2o5ga\_ d1ctaa\_ d1m45a\_ d3i5gc\_  
d1sl8a\_ d1fpwa\_ d2scpa\_ d2roaa\_ d4aqra\_ d3pn7b\_ d1br1b\_ d2mysb\_  
d1s6ca\_ d1bjfa\_ d2obha\_ d1jfka\_ d1jf0a\_ d1qv0a\_ d1lkja\_ d2mlfc\_  
d2m97a\_ d2d8na\_ d4by5a\_ d1jbaa\_ d4nqga\_ d1wdcb\_ d2mysc\_ d1j7qa\_  
d1s6ia\_ d1uhka2 d1r2ua\_ d1dtla\_ d3kf9a\_ d3pn7c\_ d1qjta\_ d1fi6a\_  
d1c07a\_ d5d67d\_ d1tuza\_ d1h8ba\_ d1eg3a1 d1eg3a2 d2zkmx1 d1snla\_  
d1gjya\_ d1y1xa\_ d1hqva\_ d1dvia\_ d1df0a1 d1qxp2a\_ d4usla\_ d1k94a\_  
d1wkya2 d1uuqa\_ d3wh9a\_ d4m1ra\_ d1xyza\_ d4xuya\_ d2je8a5 d4bf7a1  
d3cuia\_ d1ur4a\_ d1qw9a2 d1odza\_ d2vzsa5 d1bqca\_ d2x2ya1 d1hjqa\_  
d1qnra\_ d4y7ea1 d4k68a\_ d2v3ga\_ d4hpga\_ d1nofa2 d1nq6a\_ d1h4pa\_  
d1aq0a\_ d3ziza\_ d4bs0a\_ d1ecea\_ d1h1na\_ d1ta3b\_ d1w91a2 d1l1wa\_  
d1uhva2 d1us3a2 d1legza\_ d7a3ha\_ d1tvna1 d3nyda1 d1ghsa\_ d2cyga1  
d4xv0a\_ d2c8na2 d1w32a\_ d3emca\_ d1v6ya1 d1foba\_ d2uwfa1 d2fgla\_  
d3niya1 d2c0ha1 d1rh9a1 d1yq2a5 d1szna2 d1fa2a\_ d1pama4 d5do8a1  
d1ea9c3 d1hx0a2 d2fhfa5 d1qhoa4 d1avaa2 d1m53a2 d4m8ua1 d2gjpa2  
d1lwaha2 d4howa1 d1ktba2 d1j0ha3 d3vm5a1 d2x1ia\_ d1wzaa2 d1uasa2  
d2diea1 d1mxga2 d1ht6a2 d1leswa\_ d1iv8a2 d5cpsa\_ d1ud2a2 d1zjaa1  
d3gbea1 d1kwga2 d1wdpa\_ d1gcy2a\_ d1g5aa2 d1hvxa2 d3dhpa2 d2bhua3



d4do4a1 d3qgva1 d1e43a2 d1g94a2 d2d3na2 d1gjwa2 d1gvia3 d1x1na1  
d1r7aa2 d1tz7a1 glapy.1 d3ljqa\_ d4c7ga2 d2gjxa1 d1nowa1 d1jaka1  
d1yhta1 d4toqa\_ d1wb0a1 d1w9pa1 d1eoka\_ d1itxa1 d1kfwal d1goia2  
d1ledqa2 d2gsja\_ d1hjxa1 d1jnda1 d1vf8a1 d1etob\_ d1umqa\_ d1mixa2  
d1e5wa2 d1j19a2 d1isna2 d2a16b2 d3syxa1 d1mkea1 d2p8va\_ d1xoda1  
d1i7aa\_ d1evha\_ d1qc6a\_ d1legxa\_ d1id1a\_ d2hmta\_ d1lssa\_ d1liuka\_  
d2csua1 d3q9ub\_ d2yv1a1 d3q9na\_ d2d59a\_ d2yv2a1 d1leuca1 d1y81a1  
d1wgqa1 d1v89a1 d2coda1 d1zc3b\_ d1wg7a1 d1u5ea1 d1v61a1 d2coca1  
d2ys1a1 d1v5pa1 d1ntya2 d1wjma1 d1wila1 d1u29a\_ d1xx0a1 d1unqa\_  
d2zkmx3 d1fhoa\_ d1v88a1 d2adza1 d1x1fa1 d1p6sa\_ d2coaa1 d1btka\_  
d1v5ma1 d1faoa\_ d2x18a\_ d1dyna\_ d1x1ga1 d4kaxb\_ d2j59m1 d1kilb2  
d1xcga2 d1txda2 d1u5da1 d1dbha2 d1wlha\_ d1upqa\_ d1v5ua1 d1foea2  
d2fjla1 d1eaza\_ d2dfka2 d2cofa1 d1kz7a2 d1h6ua1 d91dta1 d2ewda3  
d1up7a1 d2dfda1 d1s6ya1 d1vjta1 d7mdha1 d1hyea1 d1t2da1 d1ojsa3  
d1b8pa1 d1ldna1 d1hyha1 d1civa1 d2a92a1 d1ez4a1 d1i0za1 d1y6ja1  
d1gv0a1 d1ur5a1 d1l1da1 d1lobba1 d1npya1 d3t4ea2 d1a4ia1 d1o0sa1  
d2hk9a2 d2egga2 d1b26a1 d1bvua1 d1gq2a1 d1c1da1 d1leha1 d1gtma1  
d1nvtal d3dona2 d1ledza1 d1gpja2 d1vi2a1 d1p77a1 d1nyta1 d1b0aa1  
d1v16a1 d1v91a1 d1txga2 d3f47a1 d1mv8a2 d2pv7a2 d1xc2a3 d2ahra2  
d4xiya1 d2f1ka2 d1pgja2 d1i36a2 d1np3a2 d1lj8a4 d1teaa3 d1qmg2  
d2i76a2 d2g5ca2 d1wdka3 d3cuma3 d1kola2 d1f8fa2 d1qora2 d1jqba2  
d1vj0a2 d1cdoa2 d1gu7a2 d1d1ta2 d1xa0a2 d2dm6a2 d1jvba2 d1rjwa2  
d1llua2 d1tt7a2 d1piwa2 d1o89a2 d1iz0a2 d1e3ja2 d1yb5a2 d1uufa2  
d1vj1a2 d1e3ia2 d3gpdg1 d1vc2a1 d2nvwal d1u8fo1 d1ydwa1 d1hdgo1  
d2g17a1 d1cf2o1 d2czca2 d1r0ka2 d1obfo1 d2cvoa1 d1ebfa1 d1h6da1  
d1i32a1 d1zh8a1 d2q49a1 d1qkia1 d3pzra1 d1xeea1 d1vkoa1 d1vm6a3  
d3qvsa1 d2pkqo1 d1b7go1 d1gr0a1 d1p1ja1 d1lc0a1 d1j0xo1 d3pwka1  
d2hjsa1 d1zyao1 d1vkna1 d1tlta1 d1nvmbl d3sjua\_ d3ojfa1 d1xu9a1  
d2jjya1 d1n7ha\_ d1y1pa1 d1h5qa\_ d1jtva\_ d4fs3a\_ d2bkaa1 d1gy8a\_  
d2c5aa1 d1ulsa\_ d1ooea\_ d2b69a1 d1y5ma1 d1spxa\_ d1aela\_ d1bxka\_  
d1ydea1 d1gega\_ d1hdoa\_ d1o5ia\_ d1e6ua\_ d1snya1 d2rhca\_ d3zv4a\_  
d5ceja\_ d2d1ya1 d1fjha\_ d3w8ea\_ d2fmua1 d1x1ta\_ d1rpna\_ d3ay7a1  
d1k2wa\_ d1eq2a\_ d2hrba1 d3ruaa\_ d2ew8a1 d4hwka\_ d1xgka\_ d2bd0a1  
d1yo6a1 d2a35a1 d2ntva\_ d1vl8a\_ d1hdca\_ d4bkua\_ d2ag5a1 d2q45a\_  
d1nffa\_ d4iy1a\_ d1zbqa1 d1kewa\_ d1ek6a\_ d1ja9a\_ d2q46a2 d1iy8a\_  
d1cyda\_ d2ptga\_ d1hxha\_ d1uzma1 d3lyla\_ d4m89a\_ d3wyea\_ d2b1la1  
d1w6ua\_ d1sb8a\_ d2q2va\_ d4nr0a\_ d1e6wa\_ d2gasa\_ d3oiga1 d2bgka1  
d1mxha\_ d1vl0a1 d1rkxa\_ d1r6da\_ d1wmaa1 d1e7wa\_ d2c07a1 d1xkqa\_  
d3tzha\_ d1g0oa\_ d3lz6a\_ d1qyca\_ d1ledoa\_ d1gz6a\_ d1oc2a\_ d1t2aa\_  
d1zema1 d2xoxa\_ d1z45a2 d1geea\_ d1p33a\_ d3lt0a\_ d4e6pa\_ d2wyua\_  
d1db3a\_ d4q9na\_ d1xhla\_ d4o1ma\_ d1fmca\_ d2uvda\_ d2gdza1 d1uaya\_  
d2z1ma\_ d2o23a2 d2fr1a2 d2fr1a1 d1qsga\_ d4zjua\_ d2a4ka1 d1yb1a\_  
d1wvga1 d1yxma1 d3f4ba\_ d1mg5a\_ d1xg5a1 d4ekfa\_ d2ckga\_ d1th0a\_  
d2bkra\_ d1cmxa\_ d1xd3a\_ d3ifwa\_ d1ex0a4 d2f4ma1 d1x3za\_ d1t3ca\_

d1epwa3 d2a97a\_ d3fiea\_ d3ioqa\_ d1fh0a\_ d1o0ea\_ d1khqa\_ d1m6da\_  
d2cb5a\_ g8pch.1 d1s4va\_ d2pnsa\_ d1vsna1 d1mira\_ d1iwda\_ d2oula\_  
d7pcka\_ d3bwka\_ d3bcna\_ d2p86a\_ d1pvja\_ d1pcia\_ d1gece\_ d1deua\_  
d4bs6a\_ d1xkga1 d1cqda\_ d1jqpa2 d2c0ya\_ d2bdza\_ d3p5ua\_ d2o36a\_  
d1k9xa\_ d1zoya1 d1qo8a2 d1d4ca2 d1chua2 d1jnra2 d1kf6a2 d2jk6a2  
d2jk6a1 d1feca1 d1feca2 d1lpfa1 d1lpfa2 d1xhca1 d1xhca2 d1dxla2  
d1dxla1 d1gera2 d1m6ia2 d1onfa1 d1onfa2 d3lada2 d3lada1 d1w4xa1  
d1w4xa2 d1gesa2 d1mo9a1 d1xdia1 d1fl2a2 d1fl2a1 d1fcda1 d1fcda2  
d1h6va2 d1h6va1 d1mo9a2 d1gv4a2 d1gv4a1 d2gv8a2 d2gv8a1 d1aoga1  
d1aoga2 d1hyua1 d1ebda1 d1ebda2 d3dk9a1 d1q1ra2 d1q1ra1 d1gesa1  
d1pv8a\_ d1w5qa\_ d2c1ha\_ d1ohla\_ d1l6sa\_ d1zbfa1 d2z1ha\_ d2etja1  
d3qioa1 d1j11a\_ d2e4la\_ d1j12a\_ d2lsna1 d1io2a\_ d1uaxa\_ d2yv0x\_  
d1mu2a1 d1lekea\_ d1i39a\_ d1ps9a2 d1o94a2 d1cjca1 d1pn0a1 d1reoal  
d1ju2a1 d2f5va1 d3c96a1 d2gmha1 d1pj5a2 d1gpea1 d1o5wa1 d1n4wa1  
d1k0ia1 d2dw4a2 d2ivda1 d1seza1 d2voua1 d1kdga1 d1s5ja1 d2hbja2  
d2igia\_ d1wlja\_ d1qhta1 d4dlea1 d1tgoa1 d2f96a1 d3tr8a1 d3mxma\_  
d1q8ia1 d1y97a1 d1w0ha\_ d2py5a1 d1noya\_ d1d5aa1 d1yt3a3 d2guia\_  
d3mwpal d4kb1a\_ d1b9ra\_ d1offa\_ d1frra\_ d3wcqa\_ d1e9ma\_ d1l5pa\_  
d1wria\_ d1i7ha\_ d3av8a\_ d1rfka\_ d3plma1 d3b2ga\_ d2bt6a2 d1mpya2  
d1kw3b2 d1kw3b1 d4ghga1 d1tfza1 d3isqa1 d3isqa2 d1sqia1 d1sqia2  
d1lkda2 d1lkda1 d1mpya1 d1cjxa2 d1cjxa1 d1sp9b2 d1t47a1 d1t47a2  
d1flua2 d1sp8a1 d1sp8a2 d1jmxa3 d1pbya3 d1pbya4 d1r7ha\_ d1faaa\_  
d1wika1 d1xfla\_ d1ttza1 d2f51a1 d1ti3a\_ d1nhoa\_ d1sena\_ d2i4aa\_  
d1ep7a\_ d1zmaa1 d3lefa1 d3diea1 d2yana1 d1z6na1 d1oaza\_ d3zywa1  
d4aj8a\_ d1nm3a1 d4fiwa\_ d1wmja\_ d4hs1a1 d1iloa\_ d1xwaa1 d1wjka1  
d2vmla\_ d1fb6a\_ d1gh2a\_ d1h75a\_ d1nw2a\_ d1kx5b\_ d3a6na\_ d4m6ba2  
d2nqbd\_ d3wkjd\_ d2yfwe\_ d4h9na\_ d5bnxa\_ d1kx5c\_ d3r45a\_ d1eqzb\_  
d4jjnb\_ d1f66c\_ d1eqza\_ d4wnnb\_ d1kx5a\_ d1u35c1 d1id3a\_ d2nqbc\_  
d1kx5d\_ d2b5ea2 d2b5ea3 d2b5ea1 d2b5ea4 d2kpl1a1 d2kp2a1 d1hyua3  
d1hyua4 d1j08a2 d1pd212 d1nhya2 d2a2ra2 d1k0dd2 d1f2ea2 d1gsua2  
d1f3ba2 d2fhea2 d2pvqa1 d1tw9a2 d1oyja2 d1e6ba2 d3ik7a1 d4is0a1  
d1r5aa2 d1j1va2 d1m0ua2 d3gtub2 d1z9ha2 d1okta2 d1axda2 d2gsra2  
d1tu7a2 d1k3ya2 d1zgma1 d1b48a2 d1gnwa2 d1gwca2 d2gsta2 d1glqa2  
d1oe8a2 d1pn9a2 d1v2aa2 d1fw1a2 d1duga2 d1g99a2 d2e1za2 d2e1za1  
d1saza1 d1saza2 d1ovna2 d1lig8a1 d1czan2 d1czan3 d1czan1 d1lig8a2  
d1bg3a4 d1bg3a3 d1bg3a2 d1bg3a1 g1f8v.1 d1novc\_ d2bbvc\_ d1qsaa2  
d1qqya\_ d1gd6a\_ d1ivma\_ d2gv0a\_ d1iiza\_ d2z2fa\_ d1j8xa\_ d1ghla\_  
d1b9oa\_ d1691a\_ d2o4wa\_ d1p37a\_ d1k28a3 d1xjta1 d1jtma\_ d2f2qa\_  
d4e97a1 d1iyka2 d1rxta1 d1iica2 d1iica1 d1y14b1 d2nn6i1 d1i941\_  
d2zjra2 d1smxa\_ d2qamc2 d1hh2p1 d2r7da1 d1rl2a2 d1wfga1 d3bzka4  
d1x6oa2 d3a0ja\_ d2j01d2 d2ja9a1 d4q15a\_ d1hr0w\_ d1l1uza\_ d2n3sa\_  
d2vnud1 d1h95a\_ d1go3e1 d2nn6h1 d2mo1a\_ d1iz6a2 d1jjga\_ d1e3pa2  
d2ix0a3 d2ix0a2 d21xja\_ d1ueba3 d1ueba2 d2z0sa1 d1u01a1 d2ix0a1  
d2eifa2 d2je6i1 d3i2za1 d2c35b1 d2ahob2 d1t9ha1 d3i4oa\_ d2qall1

d1jt8a\_ d2nn6g1 d1g6pa\_ d3cama\_ d1i94q\_ d1c9oa\_ d1d7qa\_ d2ba0a1  
d2vnud2 d2vnud3 d1khia2 d2qalq1 d1wi5a1 d1xtda2 d1ny4a\_ d4iuaa3  
d4bvva\_ d5hpga\_ d3k65a\_ d1ki0a3 d1ki0a2 d1ki0a1 d1a0ha1 d1pmla\_  
d3sp8a3 d2feba1 d1qsta\_ d2beia1 d4m3sa\_ d1u6ma1 d1ygha\_ d1yk3a1  
d3dr6a\_ d1xmta\_ d1z4ea1 d2ge3a1 d1bo4a\_ d2fiaa1 d2jdca1 d1y9wa1  
d3to7a\_ d1wwza1 d2f14a1 d2ozua1 d2b5ga\_ d2cy2a1 d2p0wa\_ d1cm0a\_  
d4pswa\_ d1yrea1 d1yr0a1 d1m4ia\_ d2gana1 d1yvka1 d1ghea\_ d2g3aa1  
d1y7ra1 d2euia1 d1q2ya\_ d2fsra1 d1xeba\_ d2ae6a1 d1cjwa\_ d1qsmo\_  
d2aj6a1 d1y9ka1 d1i12a\_ d1vkca\_ d2atra1 d1n71a\_ d2d4pa1 d2fiwa1  
d2fe7a1 d1tiqa1 d2ou2a\_ d1yx0a1 d2fcka1 d1p0ha\_ d2j8ma\_ d2pq8a\_  
d1z4ra1 d1s3za1 d1ufha\_ d2hqya1 d2hqya2 d1lrza2 d1lrza3 d1ne9a2  
d1xvqa1 d1pn0a2 d3hy2a\_ d2cvba1 d1o8xa\_ d1lu4a\_ d1we0a1 d2bmx1  
d2a4va1 d1psqa\_ d1xiya1 d1q98a\_ d1n8ja\_ d1zofa1 d2ggta\_ d3tjja\_  
d4jela1 d3s9fa\_ d2zcta\_ d1qmva\_ d1jfua\_ d2b1ka\_ d5dvba1 d2b5xa1  
d2v2ga\_ d1st9a\_ d3tb2a\_ d41lra\_ d4fh8a1 d1e2ya\_ d1knga\_ d2h30a\_  
d1i5ga\_ d2z9sa\_ d2f8aa1 d1tp9a1 d2b7ka\_ d1nm3a2 d3hvva\_ d2wfca1  
d4kcea\_ d1xvwa1 d4gqca1 d3qpma\_ d4k1fa\_ d1zsoa1 d1gpla\_ d1prxa\_  
d2qked\_ d4ksoa\_ d1t4za1 d1wwja\_ d1e88a1 d1l6ja5 d1l6ja4 d1eaka4  
d1eaka3 d1l6ja3 d1h8pa2 d1h8pa1 d1etha2 d1w52x1 d2ppla1 d1lpbb2  
d2oxea1 d1bu8a2 d1rp1a2 d1ys1x\_ d4hs9a\_ d1ispa\_ d1ex9a\_ d1ku0a\_  
d3qmma\_ d1lgya\_ d4l3wa\_ d1llfa\_ d1gz7a\_ d1lukca\_ d1cr6a2 d1bvsa3  
d3groa\_ d1pjaa\_ d1ei9a\_ d1svpa\_ d1mbma\_ d3su6a1 d1cula1 d4agka\_  
d1q31a\_ g1n11.1 d3e90b\_ d1ep5a\_ d3u1jb\_ d2ddfa\_ d3zxha\_ d1cgla\_  
d1eaka2 d1hy7a\_ d2jsda\_ d1cxva\_ d1hv5a\_ d1i76a\_ d3p0ya1 d1lgra1  
d1lgra2 d1n8yc2 d1n8yc1 d1m6ba2 d1m6ba1 d1dzka\_ d4t1ja\_ d2a2ua\_  
d4wfva\_ d3t1da\_ d4iaxa\_ d3zq3a\_ d2nnda\_ d1i4ua\_ d1kxoa\_ d1bbpa\_  
d1kt7a\_ d1exsa\_ d3s26a1 d1lf7a\_ d1qfta\_ d4gh7a\_ d1z24a1 d1qabe\_  
d1xkia\_ d3bx7a\_ d4iawa1 d1n0sa\_ d1gkab\_ d3kzaa\_ d2k23a\_ d2l9ca1  
d2joza1 d1gm6a\_ d3kffa\_ d3saoa1 d1e5pa\_ d1yupa1 d1iua\_ d1h6ua2  
d2tbvc\_ d1c8nc\_ d1x36a\_ d1smvc\_ d1ng0c\_ d4sbvc\_ d1lopoa\_ d1f2nc\_  
d1rmka\_ d1ixta\_ d1eyoa\_ d1cnna\_ d1fu3a\_ d1g1pa\_ d1f3ka\_ d1fyga\_  
d1rypd\_ d1irua\_ d1rypc\_ d3unfk\_ d1rypa\_ d1j2pa\_ d1irui\_ d1j2qh\_  
d3unfh\_ d1m4ya\_ d1rypb\_ d1lirul\_ d1lirug\_ d1liru2\_ d1q5rh\_ d1rypg\_  
d1g3ka\_ d1liruf\_ d1q5qa\_ d1e94a\_ d1lirub\_ d1ryph\_ d3ty6a\_ d1liruj\_  
d1liruk\_ d1rype\_ d1lirud\_ d1lirue\_ d3mi01\_ d1rypf\_ d1liruh\_ d2z3ba\_  
d1liruc\_ d3mka2\_ d1lirul\_ d1ny721 d1a6ca3 d1a6ca2 d1a6ca1 d1pgl22  
d1pgl21 d1pgl11 d1ny711 d1mqta\_ d1d4m3\_ d1fmd3\_ d2mev1\_ g1aym.1  
d1ev13\_ d4q4w1\_ d1r1a3\_ d2x5ia\_ d1rhi1\_ g1r1a.1 g1d4m.1 g1rhi.1  
d1b35b\_ d1lopa\_ d1tme1\_ d4iv1a\_ g1pvc.1 g1fpn.1 d1fpn1\_ d4gb31\_  
d1d4m1\_ d1fmd1\_ d1ev11\_ d2wzr3\_ g1cov.1 d1qqp3\_ g1fmd.1 d2x5ic\_  
d1rhi3\_ g1oop.1 d1hxs1\_ g1hxs.1 d1fpn3\_ d1bev1\_ g2mev.1 d1eah3\_  
d1aym1\_ d1pvc3\_ d1qqp1\_ d1zba3\_ d1h8ta\_ d3vbhc\_ g1b35.1 g1bev.1  
d1hxs3\_ g1ev1.1 d1bev3\_ g1tmf.1 d1tmf1\_ d1b35a\_ d2mev3\_ g1eah.1  
g1h8t.1 d1eah1\_ d4q4w3\_ d1r1a1\_ d1aym3\_ d1pvc1\_ d1zba1\_ d1h8tc\_

dloopc\_ d1tme3\_ g1qqp.1 d4iv1c\_ d1p8ba\_ d1eixa\_ d3exra\_ d2ffca1  
d2fdsa1 d3n3ma1 d2czda\_ d1q6oa\_ d2yyua\_ d1vqta1 d1dbta\_ d3ldva1  
d2flia1 d1h1ya\_ d1tqja\_ d1tqxa\_ d4lt9a1 d3tc7a1 d3hoja\_ d3vnda\_  
d3n18a1 d1geqa\_ d3naval d1v5xa\_ d4a2ra1 d3tc6a1 d1ujpa\_ d4ijba\_  
d1xcfa\_ d1vc4a\_ d1rd5a\_ d1qopa\_ d3b5va\_ d2r80b\_ d1cqxa1 d1cg5a\_  
d1gcvb\_ d3boma\_ d2h8fb\_ d2raoa\_ d3bj1a\_ d4hrrb\_ d2r50a\_ d3d1kb\_  
d2aa1b1 d3zhwa\_ d3hf4b\_ d3gdja\_ d1jebb\_ d3bj1b\_ d1x9fb\_ d1wmub\_  
d1gcva\_ d3bcqb\_ d3d4xb\_ d1gvha1 d2dc3a\_ d3hf4a\_ d4yu3a\_ d3k8ba\_  
d1qpwb\_ d2r80a\_ d3bcqa\_ d1v4wa\_ d3wtgb\_ d1j17a\_ d4esaa\_ d1a9we\_  
d3d1ab\_ d1fsla\_ d4h21a\_ d1v4wb\_ d1mwca\_ d1vhba\_ d1jeba\_ d1spgb\_  
d1h97a\_ d1q1fa\_ d1tu9a1 d3d1aa\_ d1hdsb\_ d3hyub\_ d2zfb\_ d3fs4a\_  
d1oj6a\_ d1shrb\_ d4h21b\_ d4yu3b\_ d1spga\_ d3hrwa\_ d3qqra\_ d3at5a\_  
d4wchd\_ d3hyua\_ d1cg5b\_ d1uc3a\_ d1hbra\_ d2raob\_ d1outb\_ d4esab\_  
d3gdjb\_ d3qqqa\_ d1x9fc\_ d3vrfa\_ d1litha\_ d3mkba\_ d3d4xa\_ d3mjpa\_  
d1j16a\_ d3fh9a\_ d1outa\_ d2dc3b\_ d1lit2a\_ d3eoka\_ d3g46a\_ d1qpwa\_  
d3vrfb\_ d1ch4a\_ d1x9fd\_ d1hdsa\_ d2zfb\_ d3mkbb\_ d1or4a\_ d3wtga\_  
d1a4fa\_ d3fh9b\_ d3bomb\_ d3cy5a\_ d3at5b\_ d1x9fa\_ d2oifa\_ d4lmxb\_  
d1cpcb\_ d3v57a\_ d1kn1a\_ d1cpca\_ d4f0ta\_ d2vjha\_ d4po5b\_ d1eyxa\_  
d1alla\_ d4f0tb\_ d1b33b\_ d1b8db\_ d4h0mb\_ d1b33a\_ d2vjhb\_ d4lm6b\_  
d2vmlb\_ d1a11b\_ d2vjta\_ d3dbja\_ d2vmla\_ d2vjtb\_ d4f0ub\_ d1f99b\_  
d4rmpa1 d1liaa\_ d1eyxb\_ d2uulb\_ d4lmsb\_ d4f0ua\_ d2bv8a\_ d1f99a\_  
d2bv8b\_ d2c71b\_ d3dbjb\_ d4rmpb1 d1b8da\_ d4h0ma\_ d3v57b\_ d1kn1b\_  
d1liab\_ d2uula\_ d2j96a\_ d1hlga\_ d2xqfa\_ d1ea5a\_ d1f6wa\_ d1dx4a\_  
d1qe3a\_ d1k4ya\_ d4qwwa\_ d2ha2a\_ d3c8da2 d2pbla1 d1jkma\_ d1jjia\_  
d1lzl\_ d1gl9b1 d1gkub1 d2m5ta\_ d1cqqa\_ d1wqsa\_ d5bpea\_ d2ipha\_  
d1lvoa\_ d2bhga1 d3tnta\_ d3sjia\_ d3d23a1 d2fyqa\_ d3tloa\_ d3zvea1  
d3q3ya1 d4asha1 d1s5ja2 d1qhta2 d4dlea2 d1tgoa2 d3py8a2 d1q8ia2  
d2py5a2 d1d5aa2 d1xova2 d1f74a\_ d3l21a\_ d2e1da\_ d1to3a1 d1w3ia\_  
d1sfla\_ d1n7ka\_ d1vcva1 d4imea\_ d1wa3a\_ d2ocza1 d1f2ja\_ d3m16a\_  
d2yxga\_ d1ub3a\_ d3a5fa\_ d1fbaa\_ d1l6wa\_ d1xfba1 d1wx0a1 d1vpxa1  
d1ojxa\_ d1mxsa\_ d2a4aa1 d1xkya1 d3cq0a1 d3s1xa\_ d1f05a\_ d1fdja\_  
d3cpra1 d4d2ja\_ d1cg2a1 d1yloa2 d1y7ea2 d1y0ya3 d1lfwa1 d1vixa1  
d1fnoa4 d1vh0a2 d1ysja1 d1vhea2 d1z21a1 d2fvga2 d1vgya1 d1r3na1  
d2grea2 d1xmba1 d1rtqa\_ d3rp2a\_ glucy.1 d1fuja\_ d2zchp\_ d3w94a\_  
d1si5h\_ d1lo6a\_ g2pka.1 d1cgha\_ d1kigh\_ d1a5ia\_ d3s9ba\_ d1hj8a\_  
d1ao5a\_ d2anya\_ d1q3xa1 d1gvza\_ d1azza\_ d4gsoa\_ d2f91a1 d1iaua\_  
d1gdna\_ d1eufa\_ g1fiw.1 d1eq9a\_ d4nfea\_ d2rdla\_ d1spja\_ d1elva1  
d1a7sa\_ d1ekbb\_ d1pfxc\_ d1yc0a\_ d2aiqa\_ g1fiz.1 d1fi8a\_ d4k60a\_  
d4dgja\_ d1mzaa\_ d1op0a\_ d3tjva\_ d1pytd\_ d1sgfg\_ g1gg6.1 d2eeka\_  
g1rtf.1 d1a0ja\_ d3g01a\_ d1pytc\_ d4e7na\_ d1ddja\_ d1z8ga1 d2hlca\_  
d1npma\_ d1brup\_ g1jou.1 d1sgfa\_ d1autc\_ g2hnt.1 g1kdq.1 d1orfa\_  
d3s69a\_ d4crga\_ d1fxya\_ d1bqya\_ d2ftba\_ d1pmpa\_ d2rcqa1 d1fdqa\_  
d4lkpa\_ d1sa8a\_ d1vyfa\_ d1lpja\_ d3vg7a1 d4azqa1 d1o8va\_ d5bvqa\_  
d1p6pa\_ d2qo4a\_ d1opba\_ d1yiva1 d1o1va\_ d4bvma1 d4tkba\_ d4i3ba\_

d1bwya\_ d1ftpa\_ d1ggla\_ d4gkca\_ d1cbia\_ d3p6da1 d1kqwa\_ d2a0aa1  
d1m4la\_ d2bk7a\_ d3fjua\_ d1z5ra1 d1kwma1 d1uwya2 d2c1ca1 d1dtda\_  
d1h8la2 d3lgia\_ d3i77a\_ d2z9ia2 d4nsva\_ d1lcya2 d4jcn\_ d1agja\_  
d1os8a\_ d1hpga\_ d1l1ja\_ d1qtfa\_ d1e69a\_ d1mv5a\_ d3g60a4 g1ii8.1  
d1ewqa2 d1ji0a\_ d1v43a3 d2wmfa1 d1vpla\_ d1g2912 d4a82a2 g1f2t.1  
d2d62a1 d3tuic1 d2bbsa1 d3g60a3 d2ixea\_ d1g6ha\_ d1sgwa1 d2qi9c\_  
d3rlfa1 d3b60a1 d3d31a2 d2pzea1 g1xew.1 d1jj7a\_ d1oxxk2 d2onka1  
d1wlwa\_ d1iwea\_ d1qf5a\_ d1vmaa2 d1nija1 d1np6a\_ d2p67a1 d3ihla\_  
d1okkd2 d1l1sa2 d1s1ma2 d1liona\_ d2v40a\_ d1dj3a\_ d3hida\_ d2vo1a1  
d2g0ta1 d1vcoa2 d1j8mf2 d1g3qa\_ d1xjca\_ d1p9ba\_ d1qzxa3 d1ihua2  
d1ihua1 d2qm8a\_ d1dj2a\_ d4ioja\_ d1yrba2 d1hyqa\_ d3gqba2 d1skye3  
d1xp8a1 d1tf7a2 d1tf7a1 d1ye8a1 d1skyb3 d2qe7d2 d4blta\_ d4huta\_  
d3l1daa2 d4hyya\_ d2i3ba1 d1cr1a\_ d3j9tb2 d3ntua2 d1vdza1 d2z43a\_  
d1e9ra\_ d1nlfa\_ d3ziaa2 d1n0wa\_ d1g6oa\_ d3ziad2 d3j9ta2 d1pzna2  
d3gqbb2 d2i49a\_ d1nnfa\_ d1xvxa\_ d1ursa\_ d1h3da1 d1iuda\_ d4m1va1  
d1twya\_ d3e13x\_ d2nxa1 d4pfua\_ d3ttma\_ d1elja\_ d2qmwa1 d1us5a\_  
d1y3na1 d1jeta\_ d1uqwa\_ d4f19a1 d2esna2 d3thia\_ d3fasa1 d2uyeb\_  
d2xwva1 d1r9la\_ d2fyia1 d1pb7a\_ d2ozza1 d1sw5a\_ d1nh8a1 d1vr5a1  
d2g29a\_ d1xs5a\_ d3lswa\_ d2z23a\_ d3w9va\_ d3tcha\_ d1q35a\_ d1z7me1  
d3q27a\_ d1p99a\_ d1ve4a1 d2i6ea1 d4mcoa1 d4n8ya\_ d1eu8a\_ d1zbma1  
d1hsla\_ d1lixca2 d1j1na\_ d1xvya\_ d1y9ua\_ d2z22a1 d1xoca1 d4oera\_  
d1wdna\_ d5f1qa1 d1xt8a1 d1i6aa\_ d4gwoa\_ d4igta1 d1pc3a\_ d4mmpa1  
d1o63a\_ d2cz1a1 d2onsa2 d4mija1 d4ok5a1 d2bmfa1 d2bmfa2 d1yksa1  
d1yksa2 d1jr6a\_ d2qeqa1 d2jlqa1 d1a1va2 d1eh3a\_ d3skpa\_ d1dtza1  
d1dtza2 d1ieja\_ d1jnfa2 d1ce2a1 d1jnfa1 d1b1xa2 d1jw1a1 d1jw1a2  
d1ryoa\_ d1h76a1 d1h76a2 d1c4oa1 d2p6ra3 d2p6ra4 d1oywa2 d1oywa3  
d1wrba1 d1w36b2 d1w36b1 d1c4oa2 d3bora\_ d1t6na\_ d2eyqa5 d2eyqa3  
d2eyqa2 d2zu6a2 d1veca\_ d1w36d1 d2g9na1 d1z3ix2 d2rb4a\_ d1hv8a1  
d1hv8a2 d1t5ia\_ d1w36c2 d2j0sa2 d2j0sa1 d1fuka\_ d3hjha1 d1z5za1  
d1qdea\_ d1z63a1 d1s2ma2 d1s2ma1 d1wp9a1 d1wp9a2 d1gm5a3 d1gm5a4  
d3dina4 d3dina3 d1q0ua\_ d1w36c1 d1z3ix1 d1nkta3 d1nkta4 d1uaaa2  
d1w36d2 g1qhh.1 d2fwra2 d2fwra1 d3q3ma\_ d1za0a1 d1mxra\_ d2inca\_  
d1jk0a\_ d2incb\_ d1mhyb\_ d3hf1b\_ d1mtyb\_ d1r2fa\_ d2uw1a\_ d1mhyd\_  
d3n37a\_ d1afra\_ d1oquc\_ d1syya\_ d1mtyd\_ d2o1za\_ d1uzra\_ d1smsa\_  
d2fkza\_ d1zujal d1s3qa1 d2fjca1 d1z6om1 d1veia\_ d4dyya\_ d1jiga\_  
d3gvya\_ d2pyba\_ d4cy9a1 d3bvfa1 d1r03a\_ d2cf7a\_ d1nf4a\_ d1zs3a1  
d4iwka\_ d3ka8a\_ d3np0x\_ d1lb3a\_ d4e6ka\_ d1z6oa1 d2fzfa1 d4dyua\_  
d3ge4a\_ d1jgca\_ d4am4a\_ d2z6ma\_ d1ji5a\_ d1vlga\_ d1lkoal d1krqa\_  
d3qz3a\_ d1o9ra\_ d2ffxj\_ d1euma\_ d1yv1a1 d2v2pa\_ d1j30a\_ d4di0a\_  
d1dpsa\_ d2cbia2 d1gqia1 d2choa2 d3nvva1 d1krha3 d2h88b1 d1n62a2  
d1t3qa2 d1zoyb1 d1jq4a\_ d1ffva2 d1dgja2 d1rm6c2 d1ex4a2 d1c6va\_  
d1k8rb\_ d1wgra1 d1ef5a\_ d1wfyal d1e8ya3 d1wgya1 d2cs4a1 d1wxma1  
d2byea1 d3kh0a1 d2byfa1 d1wxaa1 d1e7ua3 d1h4ra3 d4yl8a1 d2al6a3  
d1wgda1 d1wga1 d4q5eb\_ d1wjna1 d1se9a\_ d3n3kb\_ d1wz0a1 d1we6a1

d2m0xa\_ d2gbka\_ d3rt3b1 d1wh3a1 d1sifa\_ d2ekec2 d4ii2b1 d4hk2a1  
d1c3ta\_ d1m94a\_ d1wgha1 d1ttna1 d1j8ca\_ d1wx8a1 d3v6cb1 d2ma9b\_  
d4i61b1 d1bt0a\_ d2jvca1 d1iyfa\_ d2k1fa\_ d1wxva1 d1wf9a1 d1t0ya\_  
d2io0b2 d1x1ma1 d2gbma\_ d1zw7a1 d2m17a\_ d1ud7a\_ d1we7a1 d2lwpa\_  
d2gbja\_ d1wjua1 d1v6ea1 d1v86a1 d4eewa\_ d1wiaa1 d4icva\_ d4gu2a\_  
d1wx7a1 d1wy8a1 d4hjka1 d2faza1 d1v5oa1 d3ubra\_ d1qo8a1 d1d4ca1  
d2k3va\_ d1ft5a\_ d1qdba\_ d1m1qa\_ d2j7aa\_ d1h21a\_ d1ogyb\_ d4fasa\_  
d1jnia\_ d1oaha\_ d1sp3a\_ d4lu0a\_ d1of8a\_ d3unda1 d3e9aa1 d1vr6a2  
d1n8fa\_ d2qkfa\_ d1d9ea\_ d3h33a\_ d1rwja\_ d19hca\_ d1os6a\_ d3bxua\_  
d3h4na\_ d1i77a\_ d3caoa\_ d1j0pa\_ d2ctha\_ d1duwa\_ d2e84a\_ d1hh5a\_  
d1gyoa\_ d3h34a\_ d2bcgg1 d2bcgg2 d1c4xa\_ d1j1ia\_ d2rhwa\_ d1wioa4  
d1ccza2 d1vcaa1 d1dr9a2 d2d9qb1 d2nxyb2 d1um8a\_ d1ixza\_ d1qvra2  
d1qvra3 d1qzma\_ d1sxjc2 d1jr3d2 d2p65a\_ d1l8qa2 d1g8pa\_ d3hu3a3  
d1sxjd2 d1in4a2 d1sxja2 d1tuea1 d2ce7a2 d1w5sa2 d1sxjb2 d1d2na\_  
d1ny5a2 d1ofha\_ d2gnoa2 d2a5yb3 d1fnna2 d1u0ja1 d1lv7a\_ d1iqpa2  
d2fnaa2 d1ixsb2 d4gita\_ d1sxje2 d1g41a\_ d2e3fa\_ d1mm0a\_ d2e3ea\_  
d21lda\_ d2ny8x\_ d2e3ga\_ d2ny9x\_ d2nz3a\_ d21j7a\_ d1n4na\_ d2m8bb1  
d2kyqa\_ d3psma\_ d1jkza\_ d1jxca\_ d2g11a\_ d1ugla\_ d4uj0a\_ d2k4ua\_  
d1hp2a\_ d2lu9a\_ d1baha\_ d2meoa1 d1wm7a\_ d1hlya\_ d1n8ma\_ d1jlza\_  
d1wpda\_ d1c55a\_ d1pvza\_ d1wt7a\_ d1rjia\_ d1wz5a\_ d1m2sa\_ d1pjva\_  
d1c49a\_ d2ktca1 d1wmta\_ d1du9a\_ d1j5ja\_ d1rlga\_ d1c4qa\_ d1prtcl  
d2wv6d\_ d1prtf\_ d1ltrd\_ d4l63b1 d1r4pb\_ d1tl0f\_ d2bosa\_ d1prtb1  
d3chbd\_ d1t0za\_ d2i61a\_ d1t1ta\_ d1sn4a\_ d1kv0a\_ d2lkba\_ d1npia\_  
d1wwna\_ d1pe4a\_ d2kbka\_ d2li7a\_ d1djta\_ d2kbha\_ d1dq7a\_ d1sega\_  
d1omya\_ d1zywa1 d1jzaa\_ d1t61c1 d1iyjb4 d1iyjb5 d1iyjb3 d1o7ia\_  
d4ipca1 d1x3ea\_ d4apva\_ d1jb7a1 d1jb7a2 d1jb7a3 d3kdfa\_ d1ue1b\_  
d1wjja1 d3eiva\_ d1xjva2 d1xjva1 d2ccza2 d1se8a\_ d1l1oc\_ d1jb7b\_  
d1qvca\_ d3ulla\_ d1qzga\_ d1miua4 d1miua5 d1miua3 d3g48a1 d1gd7a\_  
d1mkha\_ d1pyba\_ d3ubub\_ d1legia\_ d1qo3c\_ d1v7pa\_ d1tdqb\_ d3ubua\_  
d1c3ab\_ d1h8ua\_ d3bx4b\_ d1t8ca1 d1sb2a1 d1qdda\_ d2ziba1 d3cada\_  
d1byfa\_ d1j34b\_ d1jwia\_ d1jzna\_ d1c3aa\_ d1wmza\_ d3bdwb\_ d1hq8a\_  
d1fifa1 d1dv8a\_ d3hupa\_ d1wk1a1 d1umra\_ d2afpa\_ d3bx4a\_ d1gz2a\_  
d1sl6a\_ d1v7pb\_ d3g8ka\_ d1ixxa\_ d1j34a\_ d1jwib\_ d1g1sa1 d1y17a1  
d1ja3a\_ d1fvub\_ d3bdwa\_ d1sb2b1 d1fvua\_ d1umrc\_ d1oz7a\_ d4m17a\_  
d3cfwa1 d1ypqa1 d1g1ta1 d3fd4a\_ d3l9jc\_ d4dn8a1 d1v41b\_ d1rd11\_  
d2msba\_ d1dgsa2 d1fvia1 d1ckma1 d1x9na2 d1xwdc1 d3kj4a\_ d1ozna\_  
d1w8aa\_ d2ifga3 d1xkua\_ d2shpa1 d1yfoa\_ d1l8ka\_ d2ooqa1 d1g4us2  
d1p15a\_ d1lara2 d1lara1 d1wcha\_ d2fh7a2 d2fh7a1 d1ohea1 d1ohea2  
d2f4da\_ d1rxda\_ d2hxpa\_ d1xria\_ d1d5ra2 d1fpza\_ d3ezza\_ d4y2ea\_  
d1eb6a\_ d3azya\_ d3wvja\_ d1upsa1 d1ajoa\_ d2hyka\_ d1ajka\_ d2vy0a\_  
d1o4ya\_ d3o5sa\_ d3d6ea\_ d3atga\_ d1dypa\_ d1umza\_ d3i4ia\_ d1c11a\_  
d4lbqa\_ d1a78a\_ d1slta\_ d4no4a\_ d3zsja\_ d3duia\_ d1g86a\_ d1is3a\_  
d1qmja\_ d1hlca\_ g1qmo.1 g1len.1 d3zyra\_ d1fnya\_ d1n47a\_ g2ltn.1  
d1avba\_ d3usua\_ d1dhkb\_ d1f9ka\_ d1ukga\_ d1g8wa\_ d1g9fa\_ d1wbfa\_

d3wcsa\_ dlq7ya\_ g1loe.1 d1mvqa\_ dlhq1a\_ dlv6ia\_ d1dbna\_ dlqna\_  
d1fx5a\_ d4l8qa\_ dl1oaa\_ d3n35a\_ d2h0ba\_ d2erfa\_ dlh30a2 d3mw4a1  
d1pz7a\_ d2r1ba\_ d3v64a1 d1d2sa\_ d3bopa1 d3mw3a1 d1okqa1 d1okqa2  
d1dszb\_ d1a6ya\_ d3cbba\_ d1ynwa1 d1r4ia\_ d1hcqa\_ d2hana\_ d2hanb\_  
d2enva1 d1kb4b\_ d2n11b\_ d1l01a\_ d1cita\_ d1adqa1 d1fnga1 d1uvqb1  
d1zs8a1 d2vola1 d2vola2 d1mfbl2 d2jelh2 d1uwel2 d3qq4b1 d1kjob\_  
d1k5na1 d1osph2 d4odhl2 d1ow0a1 d1ow0a2 d1bfob2 d3l9ra2 d3jtth1  
d2fath2 d4elkb2 d1fn4b2 d2xfxb\_ d1pg7x2 d1cqka\_ d4k71b2 d1lk2a1  
d1eapb2 d4lfhg2 d1i4fa1 d2nw2a2 d1kfah2 d1mhca1 d1h3ua1 d1wejh2  
d1h0db2 d1a5fh2 d1kcvh2 d1mjuh2 d1qqda1 d1kcrh2 d1k8ia1 d3huja2  
d2nnab1 d1nfd2 d3mffb2 d1s9va1 d1lk3h2 d1q0x12 d1fv1b1 d1neza1  
d4rfeb2 d1r3ha1 d1a6tb2 d1kjva1 d1pz5b2 d1onqa1 d2bc4a2 d1de4a1  
d1k8da1 d1tcra2 d1dn0b2 d1nfde2 d2xwtb2 d1bfoa2 d1mexh2 d1iakb1  
d1ypzf2 d4f7ea2 d1q7212 d2fbjh2 d1fe8h2 d1clzh2 d1fngb1 d1uvqa1  
d1vgka1 d1c16a1 d4j12a2 d4x99b2 d1igtb3 d1je6a1 d1q72h2 d1nldh2  
d1teth2 d2hmic2 d1i1ca2 d1i1ca1 d1k8ib1 d1q0yh2 d1kfa12 d3frua1  
d1pg7w2 d1u58a1 d1igyb4 d1igyb3 d1hyrc1 d1klub1 d1deeb2 d1c12b2  
d2bc4b2 d2ig2h2 d1kcv12 d3wn5b1 d1lk2b\_ d1lk312 d1mjul2 d1sm3h2  
d1q0xh2 d1zvsal d1ydpal d1u8ib2 d1ypze2 d1kcuh2 d1op9a\_ d1y01a1  
d1letzb1 d1egj11 d2gsib1 d1nj9a1 d4jfh1 d1aqk11 d1t2ja\_ d1lo4h1  
d1zvyal d3v4v11 d4enec1 d1kxtb\_ d5e8ea1 d2pxya\_ d4weud\_ d1xiwc\_  
d2esvd1 d1qnzh\_ d1ogae1 d1f4xh1 d4n1hb\_ d3ezjb1 d3mlw11 d1kfah1  
d1letza1 d1b4jh1 d3cfic\_ d4w68a\_ d2arja1 d1ek3a\_ d2ok011 d1vera\_  
d1uwgh1 d1blnb1 d1fpth1 d1rzga1 d2giya1 d4m3kb1 d1nc2a1 d2nyyd1  
d1ncna\_ d1fbih1 d5dxwa\_ d4fqqa1 d1dqd11 d1jfq11 d1kelh1 d1faih1  
d1frgl1 d1fig11 d4m6n11 d1fo0a\_ d4hxb11 d3b5ga\_ d3quyd1 d2h9gb1  
d1i8kb\_ d2dd8h1 d2ck0h1 d1eaja\_ d4w6wb1 d2a6ib3 d1t66d1 d2e27h\_  
d1ob1b1 d1f11b1 d2v7na1 d1ad0a1 d2xt1b1 d1pskh1 d4i13b1 d2op411  
d1a0q11 d1uwel1 d1za3a1 d1ncb11 d4uu9a\_ d1bm3h1 d1cloh1 d1nqba2  
d1cf8h1 d4y5va\_ d1mhph1 d5anma1 d4cdgc1 d4ldeb\_ d1y01b1 d2pcpb1  
d1z3gl1 d1dfb11 d1fh5h1 d3g5xa1 d1tzib1 d4dn311 d3zhka1 d2b1hh1  
d2uy1a1 d1f3dh1 d1nj9b1 d2agjh1 d2h1p11 d1q72h1 d8fabb1 d1ndmb1  
d1rjca1 d4u6hb1 d3upca\_ d2fbj11 d1osph1 d1tvda\_ d2cjh\_ d4fhbd1  
d1bd2d1 d1rz7h1 d3nn8a\_ d1blna1 d1knoa1 d1nfda1 d2bmkb1 d1dq11\_  
d1igyb1 d1igf11 d12e8h1 d3utza1 d1nc2b1 d1rihh1 d4mwfb1 d4jvpa1  
d1mieh1 d1rhfa1 d1fgn11 d1sbsh1 d1lp9e1 d1dn0a1 d4lqf11 d1iaih1  
d1kgcd1 d1mh5b1 d1gp011 d2g60h3 d1f8t11 d2jixd1 d4grwh\_ d1fo0b\_  
d1bfob1 d1axsa1 d1u9ka\_ d1nmbh\_ d1h8na1 d1h8na2 d1jguh1 d4eura1  
d3sdy11 d35c8h1 d1w7211 d1mvub\_ d1i9rh1 d1ob1a1 d4wenb\_ d1yeeh1  
d3ietc1 d1f58h1 d1ad0b1 d1mqk1\_ d1nbvh1 d4b50a\_ d3r8bb\_ d1baf11  
d1mamh1 d4rgne1 d2gsgb\_ d35c811 d1bafh1 d1aih1 d2pcpa1 d2fath1  
d2x1pa\_ d1orsb1 d1ibgl1 d1shma\_ d1a2yb\_ d1u0qa\_ d2coqa\_ d1hilb1  
d1qfwi\_ d1jv5b\_ d1fn4b1 d5e0qa\_ d1nsnh1 d1plgl1 d4ocx11 d1kb5h1  
d1rzfh1 d1pg7x1 d2fx7h1 d2oi9c\_ d1l7i11 d3eyva1 d1d5i11 d4ffyl\_

d1tet11 d1a6wh\_ d1ac6a\_ d3dvfa\_ d1nfdel d1mimh1 d1ri8a1 d1jhlh\_  
d3dura\_ d1fskb1 d1f97a1 d3so3b1 d2ak4d1 d1lp9f1 d4z7wf1 d1l7th1  
d4y5ya\_ d4x7ec1 d1emth1 d1likfl1 d1nlbh1 d4uta11 d1bjma1 d1eapb1  
d1u6ah1 d2dtgd1 d1kj2b\_ d1xeda1 d1cleh1 d1fgvh\_ d2bnub1 d2fb4h1  
d2dtgb1 d1ktrh\_ d1jpth1 d1qkz11 d4hepg\_ d2atpb1 d1flrh1 d2hrpl1  
d1mvfa\_ d1iaim1 d3k80a1 d2jb5h1 d3zkxc\_ d4grwe\_ d1it9h1 d1rhbb1  
d3w9ec\_ d1e4wh1 d1sy6h1 d2j6eh1 d3qxta\_ d1jglh1 d1p7ka1 d1tzhb1  
d4n8pa1 d1gaf11 d2jelh1 d1wioa2 d4i0cc1 d1cicb1 d1lmka2 d1lmka1  
d1iqwh1 d1orqb1 d1ejoh1 d1jnlh1 d4zg1a\_ d43c9b\_ d1ggbl1 d1wejh1  
d3q6fa1 d1f3dj1 d3c6la1 d1bqlh1 d3p9wb\_ d1a3r11 d1h0db1 d2uzil\_  
d1eo8l1 d1qfwl\_ d1n7ml1 d1igja1 d1c5ch1 d2a9mh\_ d1fj1b1 d4heme\_  
d1ccza1 d1a5fh1 d1ogad1 d1dlfh\_ d1qa9b\_ d1vgel1 d3qskb\_ d1sjxa\_  
d4ozfg1 d1sq2n\_ d1qd0a\_ d1kcvh1 d1c5db1 d3qcull1 d8faba1 d3bn9d1  
d1mjuh1 d4y8dc\_ d7fabh1 d3dvgb1 d1lo0l1 d1a6tb1 d1gigh1 d1kcrh1  
d2hwz11 d1yjdc1 d3clfl1 d4krna\_ d1d17l\_ d1e6o11 d1mexh1 d3r0ma\_  
d4kkna\_ d1fnsl1 d1loaqh\_ d1rzia1 d1lucbh1 d1ncw11 d4b41a\_ d1nfdfl1  
d2mpah1 d2d7t11 d4grwf\_ d4b5ea\_ d1lk3h1 d3u79a\_ d4u3xa\_ d1ghfl1  
d1bvkb\_ d1mcww1 d1b88a\_ d1jrhh1 d32c2b1 d4wemb\_ d1dsfh\_ d1op3h1  
d1cell1 d1iqda1 d1qoka1 d1qoka2 d1qfuh1 d2crya1 d1ay1h1 d1loaq1\_  
d3ab0b\_ d1rur11 d1t4kb1 d1bz7b1 d1n0xh1 d1for11 d1lucbl1 d4w6yb\_  
d43c9a\_ d2aabl1 d1tzia1 d4n1ca\_ d1k6qh1 d3g9ab\_ d4tvsa1 d1igmh\_  
d1pz5b1 d3dx9a1 d3wxwh\_ d1nakh1 d1kcul1 d3eaka\_ d4qlra1 d1cr9l1  
d1d9ka\_ d1f4xl1 d1deea1 d2i27n2 d1c12a1 d2orbl1 d1j8hd1 d1mcph1  
d1c5da1 d1kenh1 d1bd2e1 d1h5ba\_ d4x7fc1 d3upaa\_ d1t3fa1 d1indh1  
d2dtgc1 d4hc111 d1zv5a1 d4wgvb\_ d1uwgl1 d4f37k1 d1aqkh1 d1vesa\_  
d3zkqd\_ d1fpt11 d1lo4l1 d1knob1 d3rrqa\_ d1ct8b1 d4orz\_ d1mlbb1  
d4hgkc1 d1dqdl1 d1bogb1 d4ozhe1 d1dr9a1 d1i7za1 d1dn0b1 d1kell1  
d1rzib1 d1ypzfl1 d1wtla\_ d1hkfa\_ d1fail1 d1figh1 d2vyre\_ d1sjva\_  
d1ohqa\_ d1bfoa1 d1pkqb1 d1mjul1 d1b4jl1 d1nsn11 d2arjb1 d1p4bh\_  
d4aj0a\_ d3nn8b\_ d2rcja1 d1f2xk\_ d4v1dd\_ d1adqh1 d2eksa\_ d4k3ga\_  
d1jfqh1 d1uweh1 d1frgh1 d4gftb\_ d1uz8b1 d4nlea\_ d1bm3l1 d1clol1  
d3mcka1 d2vq1a1 d1ae6h1 d4aq1b1 d1uj3b1 d1nbqa1 d1fh5l1 d2ck0l1  
d2ywza\_ d1q72l1 d4nbxb\_ d1hila1 d4hz1b1 d2j88l1 d1zmya1 d1cd0a\_  
d1a4ka1 d1pskl1 d1a0qh1 d4krmb\_ d1ncbh1 d2fbjh1 d1j8he1 d1i3ua\_  
d1cf8l1 d1fe8h1 d2p1ya1 d1eeqa\_ d2x89a\_ d1ol0a\_ d2r0lh1 d1ub5a1  
d1dfbh1 d3eyvb1 d4jdvb1 d4p2cg\_ d2gsia1 d2agjl1 d1u3ha1 d2h1ph1  
d1rihl1 d1fskc1 d1boga1 d2a77l1 d1osp11 d1qfoa\_ d3dwta\_ d2fx7l1  
d1rz7l1 d3stba1 d1pkqa1 d1b6da1 d1dzba2 d1dzba1 d1kj2a\_ d4l1ha\_  
d1rzgb1 d1dq1h\_ d12e8l1 d1miel1 d1jmaa\_ d1sbs11 d1fgnh1 d1f58l1  
d1mqkh\_ d1ndgb1 d3qegl1 d1iail1 d2aw2a1 d1tqbc1 d3fo2a1 d4dkaa\_  
d1f8th1 d2g60l1 d2ywya\_ d1uj3a1 d1yc7a\_ d3bd3a\_ d4w6xb1 d1nmb1\_  
d1i8ka\_ d1rjlb1 d1ypze1 d1p7kb1 d1kxqe\_ d1gpoh1 d2z4qa1 d1w72h1  
d1i9r11 d4qgya1 d4xt1c\_ d2qqnh1 d1cica1 d3c08h1 d2cd0a\_ d2bdnh1  
d1hnga1 d1mam11 d1nldh1 d1cr9h1 d4lcih1 d3bkyh1 d3qg7l1 d1ai111



d1kxvc\_ d4iosd\_ d1l7ih1 d2x1qa\_ d1ub6b1 d3k74b\_ d1ibgh1 d1teth1  
d1igy1 d1hxma1 d2x6ma\_ d2e71a\_ d5e03a\_ d1qfwm\_ d2r0kh1 d1igjb1  
d1rurh1 d1plgh1 d1mj8h1 d1yuhb1 d3fmg11 d1rzfl1 d1emtl1 d1ad9b1  
d1igtb1 d1nlbl1 d1d5ih1 d3k7ua\_ d4ffyh\_ d1bwwa\_ d3dvga1 d1a6ta1  
d1fgvl\_ d4qxgl1 d1mim11 d1jhl1\_ d2hffb1 d2hh011 d1qkzh1 d1l7tl1  
d1afvh1 d1iaii1 d2cjuh\_ d1um5h1 d2ghwb2 d2ghwb1 d1kgce1 d2fgwh1  
d1likfh1 d1dvfd\_ d2i24n1 d2xtjb\_ d1za3b1 d2yc1a\_ d2hh0h1 d2x1oa\_  
d1bvka\_ d1rjla1 d5e7ba1 d1igta1 d1il1b1 d2fb4l1 d1mvua\_ d1jptl1  
d32c2a1 d1fvca\_ d1iqdb1 d2hrph1 d2p4ab\_ d4qola\_ d1p2cb1 d1wt5c\_  
d1t4ka1 d5c1mb\_ d1it9l1 d1bz7a1 d1b2wh1 d1e4wl1 d1jnl11 d1yedb1  
d1za6b1 d3u7aa\_ d1igfh1 d3gnml1 d1orsa1 d1wejl1 d1a2ya\_ d1hxmb1  
d1gafh1 d2j4wh1 d1pz5a1 d1j05a\_ d1a3rh1 d4fqll1 d1qfwh\_ d1eo8h1  
d1n7mh1 d4s11a\_ d1kegh1 d5da4a\_ d1iqwl1 d3whxb1 d1vgeh1 d1deeb1  
d1c12b1 d1t2ql1 d1ad9a1 d3gsnb1 d3b2uc1 d1ggbh1 d1t3fb1 d1nak11  
d4ocmc\_ d1lila1 d2v7hb3 d2esve1 d1mcoh1 d2qr0b1 d2q3aa\_ d1ct8a1  
d1kcr11 d2pxyb\_ d2uzih\_ d5c3ld\_ d3durb\_ d1c5cl1 d2ak4e1 d1d17h\_  
d1xiwd\_ d1mlba1 d1rmfl1 d1i7zb1 d1dlfl\_ d2xa3a\_ d5bq7b1 d1dqqb1  
d3h42l1 d1egjh1 d1kcvl1 d1fe8l1 d2j6el1 d1f3rb2 d1lk3l1 d1sm3h1  
d1q0xh1 d1ghfh1 d7fabl1 d1igch1 d1lo0h1 d4idla\_ d5c2b1\_ d1jrh11  
d1l11a1 d3zhda1 d4kffc\_ d1b0wa\_ d1e6oh1 d1mexl1 d4krpb\_ d1fnsh1  
d1ncwh1 d4hgma\_ d4eigb1 d4rzca\_ d2mpal1 d4y5xa\_ d5en2b1 d3lrga1  
d4ej1c1 d1rhha1 d1j05b\_ d1forh1 d1q9wb1 d2wzpd\_ d2aq2a1 d1h0da1  
d3revb1 d2ij0c1 d1tzha1 d4m7jl1 d1k6ql1 d3b9kc1 d1igml\_ d3qeua1  
d1dsfl\_ d1ce1h1 d1kcu1 d1zvha1 d1zvoa1 d1tqbb1 d1ay1l1 d2qsc11  
d2cgrh1 d1nl0h1 d1ken11 d3eo0a1 d4n9ob1 d1n0xl1 d3k1kc\_ d2m9wa1  
d3dfxa\_ d2aq2b1 d1ck1a1 d1enfa1 d1i4pa1 d1vloa1 d1et9a1 d1esfa1  
d2g9hd1 d4ohja1 d1klud1 d1bxta1 d1ty0a1 d1fnua1 d2qaln1 d2cqva1  
d1fhga\_ d2k1ma\_ d2d12a1 d1biha3 d1biha1 d1biha4 d3qp3a1 d1g1ca\_  
d1gxea\_ d1cvsc2 d1cvsc1 d1xmwa2 d2otpa2 d1biha2 d1rhfa2 d2fcba2  
d2fcba1 d1wwbx\_ d1gsma2 d1epfa1 d1epfa2 d2dava1 d1waaa\_ d1f97a2  
d1x44a1 d1vcaa2 d1fnla2 d1fnla1 d3b5ha2 d3h8na2 d3h8na1 d1jbj11  
d1jbj12 d1pd6a\_ d1f2qa2 d1f2qa1 d3cx2a\_ d1nbqa2 d3b5ha1 d1n26a1  
d1xiwb\_ d1xa1a\_ d1fltx\_ d2ifga1 d1olla1 d1olla2 d1cs6a4 d1cs6a3  
d1cs6a2 d1cs6a1 d2gw5a2 d1sy6a1 d1xiwa\_ d1lucta2 d1lucta1 d1ry7b2  
d1gl4b\_ d1qz1a3 d1olza1 d2c9aa1 d1lwca\_

**Family-38 (b.55.1.1)**

**Positive dataset contains 36 protein sequences.**

d1wgqa1 d1v89a1 d2coda1 d1zc3b\_ d1wg7a1 d1u5ea1 d1v61a1 d2coca1  
d2ys1a1 d1v5pa1 d1ntya2 d1wjma1 d1wila1 d1u29a\_ d1xx0a1 d1unqa\_  
d2zkmx3 d1v88a1 d2adza1 d1x1fa1 d1p6sa\_ d2coaa1 d1v5ma1 d2x18a\_  
d1xlga1 d4kaxb\_ d2j59m1 d1xcga2 d1txda2 d1u5da1 d1wlha\_ d1upqa\_  
d1v5ua1 d2fjla1 d2dfka2 d2cofa1

**Negative dataset contains 4028 protein sequences.**

d1ax4a\_ d2v1pa1 d2ez1a\_ d1u08a\_ d1lc5a\_ d2ay1a\_ d1bw0a\_ d3pd6a\_

d7aata\_ d2csta\_ d1j32a\_ d1fg7a\_ d4wlha\_ d1o4sa\_ d1v2da\_ d1gdea\_  
d1m6sa\_ d1v72a1 d1svva\_ d1ajsa\_ d1wsta1 d2f8ja2 d1lk9a\_ d1vp4a1  
d1xi9a1 d2gb3a1 d1yaaa\_ d2bnma2 d3i2ka1 d1mpxa2 d1js9c\_ d1f15b\_  
d1za7a\_ d1laja\_ d3ehbb1 d1fftb1 d1gyca3 d1hfua2 d1kbva1 d1kbva2  
d1sdda1 d1sdda2 d1gyca1 d1gyca2 d1mzya1 d2bw4a1 d1aoza1 d1aoza3  
d1aoza2 d1kyaa2 d1kyaa3 d1kyaa1 d1mzya2 d4e9sa1 d1sddb1 d1sddb2  
d1hfua1 d1hfua3 d1oe1a2 d1oe1a1 d1v10a2 d1v10a3 d1v10a1 d2dara2  
d2dara1 d1wyha2 d2dloa2 d1rutx4 d1rutx3 d2cuqa2 d1x41a2 d1x41a1  
d1x3ha2 d1x3ha1 d2d8za1 d1x61a2 d1x6aa1 d1x6aa2 d2cora2 d2cora1  
d1v6ga1 d1v6ga2 d2d8za2 d1x64a1 d1x64a2 d1b8ta1 d2co8a1 d1x63a2  
d2dj7a2 d2dj7a1 d2cu8a2 d2cu8a1 d1g47a2 d1g47a1 d1j2oa1 d1wyha1  
d2dloa1 d1wiga1 d1wiga2 d2cupa2 d2cupa3 d1x68a1 d2d8ya2 d2d8ya1  
d1m3va2 d1x62a1 d1x68a2 d1x61a1 d1b8ta3 d1b8ta2 d2d8xa2 d2d8xa1  
d1x4ka1 d1x4ka2 d2cuqa1 d1m3va1 d2co8a2 d1j2oa2 d1x63a1 d2cura1  
d2cura2 d1x62a2 d2cfba1 d1dfoa\_ d1o69a\_ d1bj4a\_ d3k28a\_ d2bwpa\_  
d3lg0a\_ d2fnua\_ d3ou5a\_ d1z7da1 d1b9ha\_ d1iaya\_ d4msoa\_ d1bs0a\_  
d1s0aa\_ d1sffa\_ d3tqxa\_ d1mdoa\_ d3qboa\_ d3pgya\_ d1bjna\_ d2dkja\_  
d1ejia\_ d1vefa1 d4wxga\_ d3bs8a\_ d3gbxa1 d1w23a\_ d1a3qa1 d1iknc\_  
d3brda1 d1p7h11 d1oy3c\_ d1gjia1 d1zk9a1 d2cxka1 d2bema\_ d1pama1  
d1ea9c1 d1qhoa1 d2fhfa2 d2fhfa1 d1k3ia1 d1j0ha1 d1csla1 d2bhua1  
d1ledqa1 d1f1sa2 d1ut9a2 d1gvia1 d1txka1 d4alac\_ d1pjwa\_ d1rera1  
d1s6na\_ d3uzqb\_ d2phla1 d1fxza2 d1fxza1 d1lrha\_ d1uija1 g1dgw.1  
d2v09a\_ d1uika2 d1uika1 d1dgwa\_ d1lep0a\_ d2pa7a1 d1wlta1 d1nxma\_  
d2c0za1 d1ex0a1 d1g0da1 d1ju8a\_ d2bjca1 d2hsga1 d1qpza1 d1mqta\_  
d1d4m3\_ d1fmd3\_ d2mev1\_ g1aym.1 d1ev13\_ d4q4w1\_ d1r1a3\_ d2x5ia\_  
d1rhi1\_ g1r1a.1 g1d4m.1 g1rhi.1 d1b35b\_ d1loopa\_ d1tme1\_ d4iv1a\_  
g1pvc.1 g1fpn.1 d1fpn1\_ d4gb31\_ d1d4m1\_ d1fmd1\_ d1ev11\_ d2wzr3\_  
g1cov.1 d1qqp3\_ g1fmd.1 d2x5ic\_ d1rhi3\_ g1oop.1 d1hxs1\_ g1hxs.1  
d1fpn3\_ d1bev1\_ g2mev.1 d1eah3\_ d1aym1\_ d1pvc3\_ d1qqp1\_ d1zba3\_  
d1h8ta\_ d3vbhc\_ g1b35.1 g1bev.1 g1ev1.1 d1bev3\_ g1tmf.1 d1tmf1\_  
d1b35a\_ d2mev3\_ g1eah.1 g1h8t.1 d1eah1\_ d4q4w3\_ d1r1a1\_ d1aym3\_  
d1pvc1\_ d1zba1\_ d1h8tc\_ d1oopc\_ d1tme3\_ g1qqp.1 d4iv1c\_ g1tme.1  
d1r0ka3 d1j5pa3 d1vkoa2 d1vm6a2 d3qvsaa2 d1gr0a2 d1p1ja2 d2ovga\_  
d1sq8a\_ d1rzsa\_ d3kz3a\_ d3orca\_ d3gpdg2 d2q49a2 d1hdgo2 d2g17a2  
d2cvoa2 d2czca1 d3pwka2 d1obfo2 d1i32a2 d1zyao2 d2pkqo2 d1b7go2  
d2hjsa2 d1cf2o2 d1vkna2 d1nvmb2 d1ux8a\_ d4i0va\_ d2bkma\_ d1dlwa\_  
d2bmma\_ d2msya\_ d2djoa1 d2r5za\_ d1au7a1 d1f43a\_ d2lmda1 d1akhb\_  
d1s7ea1 d3nara\_ d1zq3p1 d2craa1 d1mija\_ d4uuta\_ d3a01a\_ d1x58a1  
d3rkqa1 d3cmya1 d2cqxa1 d2da6a1 d1e3oc1 d1fjla\_ d1mh3a1 d1ig7a\_  
d1x41a1 d1wh7a1 d1gt0c1 d2mw8a\_ d1lfup\_ d1x2ma1 d1b72a\_ d1wi3a1  
d1jgga\_ d1wjha1 d1x2na1 d1mnmc\_ d2cuea1 d3k2aa\_ d2hosa\_ d2jwta2  
d1pufa\_ d1octic1 d2hi3a\_ d1b8ia\_ d4j19a\_ d3lnqa\_ d1wh5a1 d1b8ib\_  
d1fexa\_ d2cgra1 d1guua\_ d1ug2a1 d2cqqa1 d2ajea1 d4a69c\_ d1h8ac1  
d2crga1 d2iw5b1 d1xc5a1 d1ofcx1 d2cu7a1 d1wgxa1 d2cjja1 d2ckxa1

d1gvda\_ d1hcra\_ d1tc3c\_ d1gdta1 d1u78a2 d6paxa1 d6paxa2 d1k78a1  
d2r80b\_ d1cqxa1 d1cg5a\_ d1gcvb\_ d3boma\_ d2h8fb\_ d2raoa\_ d3bj1a\_  
d4hrrb\_ d2r50a\_ d3d1kb\_ d2aa1b1 d3zhwa\_ d3hf4b\_ d3gdja\_ d1jebb\_  
d3bj1b\_ d1x9fb\_ d1wmub\_ d1gcva\_ d3bcqb\_ d3d4xb\_ d1gvha1 d2dc3a\_  
d3hf4a\_ d4yu3a\_ d3k8ba\_ d1qpwb\_ d2r80a\_ d3bcqa\_ d1v4wa\_ d3wtgb\_  
d1j17a\_ d4esaa\_ d3d1ab\_ d1fsla\_ d4h21a\_ d1v4wb\_ d1mwca\_ d1vhba\_  
d1jeba\_ d1spgb\_ d1h97a\_ d1q1fa\_ d1tu9a1 d3d1aa\_ d1hdsb\_ d3hyub\_  
d2zfb\_ d3fs4a\_ d1oj6a\_ d1shrb\_ d4h21b\_ d4yu3b\_ d1spga\_ d3hrwa\_  
d3qqra\_ d3at5a\_ d4wchd\_ d3hyua\_ d1cg5b\_ d1uc3a\_ d1hbra\_ d2raob\_  
d1outb\_ d4esab\_ d3gdjb\_ d3qqqa\_ d1x9fc\_ d3vrfa\_ d1litha\_ d3mkba\_  
d3d4xa\_ d3mjpa\_ d1j16a\_ d3fh9a\_ d1outa\_ d2dc3b\_ d1lit2a\_ d3eoka\_  
d3g46a\_ d1qpwa\_ d3vrfb\_ d1ch4a\_ d1x9fd\_ d1hdsa\_ d2zfa\_ d3mkbb\_  
d1or4a\_ d3wtga\_ d1a4fa\_ d3fh9b\_ d3bomb\_ d3cy5a\_ d3at5b\_ d1x9fa\_  
d2oifa\_ d1hlva1 d1iufa2 d1iufa1 d1b10a1 d1b10a2 d1d5ya2 d3lv8a\_  
d1s3ga1 d1zaka1 d1s4qa\_ d3tvta2 d1uf9a\_ d1khta\_ d1ckea\_ d1osna\_  
d1p5zb\_ d4tmka\_ d3cm0a\_ d1tmka\_ d1jaga\_ d3h86a\_ d1t0hb\_ d1nn5a\_  
d2h92a\_ d3kb2a1 d2c95a1 d1yj5a2 d1kgda\_ d1ly1a\_ d2ak3a1 d1vyva2  
d2grja1 d1p3ja1 d1y63a\_ d1e4ya1 d1s96a\_ d3iija1 d1lvga\_ d1nksa\_  
d1vyua2 d4e22a\_ d1qf9a\_ d1jjva\_ d1q3ta\_ d1ki9a\_ d1lw7a2 d1teva\_  
d1kjwa2 d1gsia\_ d2iyva2 d1viaa\_ d1e6ca\_ d1g3ma\_ d1j99a\_ d1t8ta1  
d1insta\_ d1fmja\_ d1zrha\_ d1ls6a\_ d2a3ra\_ d1aqua\_ d2zptx\_ d3ckla\_  
d1texas\_ d1q44a\_ d2gwha\_ d1odfa\_ d1uj2a\_ d4gi7a\_ d2jeoa1 d1rz3a\_  
d1z0ja1 d3umra2 d3gj0a1 d2gaoa1 d1yzga1 d1x3sa1 d1g7sa4 d1puja\_  
d1udxa2 d1kk1a3 d2o52a\_ d1jwyb\_ d1zcaa2 d1zcba2 d2fv8a1 d2cjwa\_  
d3dz8a1 d1xzpa2 d1vg8a\_ d4qxaa\_ d2ew1a1 d1x1ra1 d2bcgy\_ d3doea1  
d3cona\_ d3rega\_ d3wyga\_ d1upta\_ d2b6ha1 d1zd9a1 d1lnza2 d1r5ba3  
d1r2qa\_ d2f91a1 d2rhda\_ d3q3jb\_ d3q85a\_ d1efma1 d1r8qa\_ d2gf9a1  
d2akab1 d1ek0a\_ d1z08a1 d2gcoa1 d2dyla2 d4g01b\_ d2cxa1 d1svia\_  
d3q72a\_ d1ni3a1 d4ac9a4 d2erxa1 d2bmea\_ d1wxqa1 d2gf0a1 d4ldja1  
d1zunb3 d1d5ca\_ d4lv5b\_ d1efca3 d1kmqa\_ d2g6ba1 d3lrpa\_ d1tada2  
d2y8ea\_ d4rd4a1 d1z06a1 d2heia\_ d3a58b\_ d1u01a2 d1d2ea3 d1zj6a1  
d2ocba\_ d3rwoa\_ d1mr3f\_ d2e9sa1 d4u5xa1 d2iwra\_ d2fn4a1 d3bwdd\_  
d2nzja1 d2atva1 d2ksqa\_ d3l43a\_ d1mkya2 d1mkya1 d1wmsa\_ d1jnja3  
d2rmka\_ d1f6ba\_ d1f60a3 d1gota2 d1jala1 d2fh5b1 d1g16a\_ d2wblc\_  
d1m7ba\_ d1wf3a1 d1f5na2 d1t9ha2 d1z6xa1 d1z0aa1 d2fg5a1 d2a5ja1  
d2bcjq2 d1s0ua3 d1ky3a\_ d4y0va\_ d4lhwa\_ d2qmea1 d2atxa1 d1legaa1  
d1ryha\_ d1moza\_ d1nrjb\_ d2erya1 d3bfka\_ d1puia\_ d1fzqa\_ d3j3az1  
d3t5ga\_ d1shza2 d3defa\_ d2f7sa1 d3raba\_ d3tsoa\_ d3aq4a\_ d2a17a1  
d3sfva1 d3bc1a\_ d2ncda\_ d1sdma\_ d3h4sa1 d2heha\_ d2grya\_ g3kin.1  
d1kk8a2 d1br2a2 d1goja\_ d1f9va\_ d2mysa2 d3t0qa\_ d4db1a1 d3gbja\_  
d1ry6a\_ d1v8ka\_ d1k8ka2 d1k8ka1 d3uleb1 d3i33a2 d3i33a1 d1dkgd2  
d1dkgd1 d4ci6a2 d1jcfa1 d4a2ba2 d2fxua1 d1yaga2 d1yaga1 d4cbua2  
d1bupa2 d1g99a1 d2e1za2 d2e1za1 d1saza1 d1saza2 d1iqca2 d1eb7a2  
d1eb7a1 d1nmla2 d1nmla1 d2d0oa3 d2d0oa2 d1nbwa3 d1hroa\_ d4gedb\_

d3zooa\_ d1mz4a\_ d1gu2a\_ d1f1fa\_ d1dvva\_ d1c6ra\_ d1c75a\_ d1e29a\_  
d1gdva\_ d1cnoa\_ d1h32b\_ d1co6a\_ d2bh4x\_ d2aiua\_ d5cytr\_ d1jdla\_  
d1i8oa\_ d2zboa\_ d3dmia\_ d1ls9a\_ d1wvec\_ d2yk3a\_ d3ph2b\_ d1dw0a\_  
d5aura\_ d1ql3a\_ d1qn2a\_ d1f1ca\_ d4zzva\_ d2xspa\_ d1leg1a\_ d4v20a\_  
d1ojja\_ d4ipma1 d4csia\_ d3pfza\_ d3ovwa\_ d2yoka\_ d2nqya\_ d1h4ga\_  
d1hixa\_ d1oa2a\_ d1olra\_ d3b7ma\_ d4h7ma1 d3wp3a\_ d2vgda\_ d1goa\_  
d3zsea\_ d2nlra\_ d3wx5a\_ d1oa3a\_ d1pvxa\_ d1m4wa\_ d1f5ja\_ d1oa4a\_  
d1ks5a\_ d4ixla1 d2ah2a1 d1n1ta1 d1evsa\_ d1cnt1\_ d1pvhb\_ d1z7ca\_  
d1huwa\_ d1bgea\_ d1rhga\_ d1f6fa\_ d1f45b\_ d1ilrb\_ d1axia\_ d1etea\_  
d3tgxb\_ d1scfa\_ d2z3qa1 d3qb1a\_ d1hula\_ d1m48a\_ d4nkqb\_ d1eera\_  
d1v7mv\_ d5e4ea\_ d2o27a\_ d3b5ka\_ d2psma1 d4zf7a\_ d3uf5a\_ d4x51a\_  
d1d9ca\_ d4ypgc1 d3oq3a\_ d1lqsl\_ d1n1fa\_ d1aula\_ d1wu3i\_ d3bes1\_  
d3ux9a\_ d1v8fa\_ d2ejca\_ d3muea1 d3q12a1 d2el7a\_ d1iq0a2 d1irxa2  
d1ivsa4 d2cyba\_ d1rqga2 d1j09a2 d2yxna\_ d1f7ua2 d1h3fa1 d1ffya3  
d2g36a1 d1nzja\_ d1jila\_ d1n3la\_ d1i6la\_ d1pfva2 d1h3na3 d3n9ia\_  
d3sz3a1 d3sw2a\_ d1moxc\_ d1dx5i3 d1edmb\_ d1autl2 d1autl1 d1nqlb\_  
d1dva11 d1szba2 d1kigl\_ d2y5fl\_ d1ijqa2 d1gk5a\_ d1g1sa2 d1nt0a3  
d1xdtr\_ d1lmja2 d1lmja1 d1nzia2 d2wphe\_ d1klil\_ d1pfxl2 d1pfxl1  
d1p9ja\_ d1glta2 d1f7ea\_ d4yzub\_ d1f56a\_ d1bypa\_ d1azca\_ d1ws8a\_  
d3u25a\_ d1cuoa\_ d1id2a\_ d1rkra\_ d2iaac\_ d4dp1x\_ d1nwpa\_ d2gima\_  
d2i7sa\_ d1qhqa\_ d2y5ia\_ d1qlsa\_ d1psra\_ d3n22a\_ d2egda\_ d4ggfc\_  
d2wcea\_ d2luca\_ d4aqia\_ d3nsia\_ d2lp3a\_ d1j55a\_ d1k8ua\_ d1nsha\_  
d1pvaa\_ d3fs7a\_ d1ttxa\_ d1rwya\_ d2kyfa\_ d1rk9a\_ d1a75a\_ d1lexra\_  
d1tiza1 d1nyaa\_ d1g8ia\_ d1ggwa\_ d1wdcc\_ d3fwba\_ d1ggza\_ d2o5ga\_  
d1ctaa\_ d1m45a\_ d3i5gc\_ d1sl8a\_ d1fpwa\_ d2scpa\_ d2roaa\_ d4aqra\_  
d3pn7b\_ d1br1b\_ d2mysb\_ d1s6ca\_ d1bjfa\_ d2obha\_ d1jfka\_ d1jf0a\_  
d1qv0a\_ d1lkja\_ d2mlfc\_ d2m97a\_ d2d8na\_ d4by5a\_ d1jbaa\_ d4nqga\_  
d1wdcb\_ d2mysc\_ d1j7qa\_ d1s6ia\_ d1uhka2 d1r2ua\_ d1dtla\_ d3kf9a\_  
d3pn7c\_ d1qjta\_ d1fi6a\_ d1c07a\_ d5d67d\_ d1tuza\_ d1h8ba\_ d1leg3a1  
d2zkmx1 d1snla\_ d1gjya\_ d1y1xa\_ d1hqva\_ d1dvia\_ d1df0a1 d4usla\_  
d1k94a\_ d1wkya2 d1uuqa\_ d3wh9a\_ d4mlra\_ d1xyza\_ d4xuya\_ d2je8a5  
d4bf7a1 d3cuia\_ d1ur4a\_ d1qw9a2 d1odza\_ d2vzsa5 d1bqca\_ d2x2ya1  
d1hjqa\_ d1qnra\_ d4y7ea1 d1vjza\_ d4k68a\_ d2v3ga\_ d4hpga\_ d1nofa2  
d1nq6a\_ d1h4pa\_ d1aq0a\_ d3ziza\_ d4bs0a\_ d1lecea\_ d1h1na\_ d1ta3b\_  
d1w91a2 d1ilwa\_ d1uhva2 d1us3a2 d1legza\_ d7a3ha\_ d1tvna1 d3nyda1  
d1ghsa\_ d2cyga1 d4xv0a\_ d2c8na2 d1w32a\_ d3emca\_ d1v6ya1 d1foba\_  
d2uwfa1 d2fgla\_ d3niya1 d2c0ha1 d1rh9a1 d1yq2a5 d1szna2 d1fa2a\_  
d1pama4 d5do8a1 d1ea9c3 d1hx0a2 d2fhfa5 d1qhoa4 d1avaa2 d1m53a2  
d4m8ua1 d2gjpa2 d1lwha2 d4howa1 d1ktba2 d1j0ha3 d3vm5a1 d2x1ia\_  
d1wzaa2 d1uasa2 d2diea1 d1mxga2 d1ht6a2 d1eswa\_ d1iv8a2 d5cpsa\_  
d1ud2a2 d1zjaa1 d3gbea1 d1kwga2 d1wdpa\_ d1gcya2 d1g5aa2 d1hvxa2  
d3dhp2a2 d2bhua3 d4do4a1 d3qgva1 d1e43a2 d1g94a2 d2d3na2 d1gjwa2  
d1gvia3 d1x1na1 d1r7aa2 d1tz7a1 d4toqa\_ d1wb0a1 d1w9pa1 d1eoka\_  
d1litxa1 d1kfwal d1goia2 d1edqa2 d2gsja\_ d1hjxa1 d1jnda1 d1vf8a1

d3wdpp1 d3wq5a\_ d1gnxa\_ d4gxpa\_ d4hz8a\_ d1e4mm\_ d3aiua\_ d1wcca1  
d3ahxa\_ d1v02a\_ d2dgaa\_ d1pbga\_ d1vffa1 d1qoxa\_ d4ha4a\_ d2csua1  
d3q9ub\_ d2yv1a1 d3q9na\_ d2d59a\_ d1oi7a1 d2yv2a1 d1euca1 d1y81a1  
d3nvva1 d1krha3 d2h88b1 d1n62a2 d1t3qa2 d1kf6b2 d1zoyb1 d1jq4a\_  
d1ffva2 d1dgja2 d1rm6c2 d91dta1 d2ewda3 d1up7a1 d2dfda1 d1s6ya1  
d1vjta1 d7mdha1 d1hyea1 d1t2da1 d1ojsa3 d1b8pa1 d1lldna1 d1hyha1  
d1civa1 d2a92a1 d1ez4a1 d1y6ja1 d1gv0a1 d1ur5a1 d1llda1 d1lobba1  
d1v8ba1 d1gdha1 d1l7da1 d2dlda1 d1mx3a1 d1ygya1 d1qp8a1 d1li4a1  
d1j4aa1 d1npya1 d3t4ea2 d1a4ia1 d1o0sa1 d2hk9a2 d2egga2 d1b26a1  
d1bvua1 d1gq2a1 d1clda1 d1leha1 d1gtma1 d1euzal d1nvtal d3dona2  
d1ledza1 d1vi2a1 d1p77a1 d1nyta1 d1b0aa1 d1vl6a1 d1v9la1 d1txga2  
d3f47a1 d2pv7a2 d1xc2a3 d2ahra2 d4xiya1 d2f1ka2 d1pgja2 d1i36a2  
d1np3a2 d1lj8a4 d1teaa3 d1qmga2 d2i76a2 d2g5ca2 d1wdka3 d1dlja2  
d3cuma3 d1f8fa2 d1qora2 d1jqba2 d1vj0a2 d1cdoa2 d1gu7a2 d1d1ta2  
d1xa0a2 d2dm6a2 d1jvba2 d1rjwa2 d1llua2 d1h2ba2 d1tt7a2 d1piwa2  
d1o89a2 d1iz0a2 d1e3ja2 d1yb5a2 d1uufa2 d1vj1a2 d1e3ia2 d3gpdg1  
d1vc2a1 d2nvwa1 d1u8fo1 d1ydwa1 d1hdgo1 d2g17a1 d1cf2o1 d2czca2  
d1r0ka2 d1lobfo1 d2cvoa1 d1ebfa1 d1h6da1 d1i32a1 d1zh8a1 d2q49a1  
d1qkia1 d1j5pa4 d3pzra1 d1xeea1 d1vkoa1 d1vm6a3 d3qvsa1 d2pkqo1  
d1b7go1 d1gr0a1 d1p1ja1 d1lc0a1 d1j0xo1 d3pwka1 d2hjsa1 d1zyao1  
d1vkna1 d1tlta1 d1nvmbl d3sjua\_ d3ojfa1 d1xu9a1 d2jjya1 d1n7ha\_  
d1ylpa1 d1h5qa\_ d1jtva\_ d4fs3a\_ d2bkaa1 d1gy8a\_ d2c5aa1 d1ulsa\_  
d1ooea\_ d2b69a1 d1y5ma1 d1spxa\_ d1aela\_ d1bxka\_ d1ydea1 d1gega\_  
d1hdoa\_ d1o5ia\_ d1e6ua\_ d1snya1 d2rhca\_ d3zv4a\_ d5ceja\_ d2d1ya1  
d1fjha\_ d3w8ea\_ d2fmua1 d1x1ta\_ d1rpna\_ d3ay7a1 d1k2wa\_ d1eq2a\_  
d2hrba1 d3ruaa\_ d2ew8a1 d4hwka\_ d1xgka\_ d2bd0a1 d1yo6a1 d2a35a1  
d2ntva\_ d1vl8a\_ d1hdca\_ d4bkua\_ d2ag5a1 d2q45a\_ d1nffa\_ d4iy1a\_  
d1zbqa1 d1kewa\_ d1ek6a\_ d1ja9a\_ d2q46a2 d1iy8a\_ d1cyda\_ d2ptga\_  
d1hxha\_ d1uzma1 d3lyla\_ d4m89a\_ d3wyea\_ d2blla1 d1w6ua\_ d1sb8a\_  
d2q2va\_ d4nr0a\_ d1e6wa\_ d2gasa\_ d3oiga1 d2bgka1 d1mxha\_ d1vl0a1  
d1rkxa\_ d1r6da\_ d1wmaa1 d1e7wa\_ d2c07a1 d1xkqa\_ d3tzha\_ d1g0oa\_  
d3lz6a\_ d1qyca\_ d1ledoa\_ d1gz6a\_ d1oc2a\_ d1t2aa\_ d1zema1 d2xoxa\_  
d1z45a2 d1geea\_ d1p33a\_ d3lt0a\_ d4e6pa\_ d2wyua\_ d1db3a\_ d4q9na\_  
d1xhla\_ d4o1ma\_ d1fmca\_ d2uvda\_ d2gdza1 d1uaya\_ d2z1ma\_ d2o23a2  
d2fr1a2 d2fr1a1 d1qsga\_ d1qyda\_ d4zjua\_ d2a4ka1 d1yb1a\_ d1wvga1  
d1yxma1 d3f4ba\_ d1mg5a\_ d1xg5a1 d1r55a1 d3gboa\_ d1atla\_ d1kufa\_  
d1buda\_ d4q1la\_ d1quaa\_ d1yp1a\_ d1wnia\_ d4ekfa\_ d2ckga\_ d1th0a\_  
d2bkra\_ d1qxpa4 d1ziva1 d1zcma1 d3ioqa\_ d1fh0a\_ d1o0ea\_ d1khqa\_  
d1m6da\_ d2cb5a\_ d1cs8a\_ g8pch.1 d1s4va\_ d2pnsa\_ d1vsna1 d1mira\_  
d1iwda\_ d2oula\_ d7pcka\_ d3bwka\_ d3bcna\_ d2p86a\_ d1pvja\_ d1pcia\_  
d1gece\_ d1deua\_ d4bs6a\_ d1xkga1 d1cqda\_ d1jqpa2 d2c0ya\_ d2bdza\_  
d3p5ua\_ d1zoya1 d1qo8a2 d1d4ca2 d1chua2 d1jnra2 d1kf6a2 d2jk6a2  
d2jk6a1 d1feca1 d1feca2 d1lpfa1 d1lpfa2 d1xhca1 d1xhca2 d1dxla2  
d1dxla1 d1gera2 d1m6ia2 d1onfa1 d1onfa2 d3lada2 d3lada1 d1w4xa1

d1w4xa2 d1gesa2 d1mo9a1 d1xdia1 d1f12a2 d1f12a1 d1fcda1 d1fcda2  
d1h6va2 d1h6va1 d1mo9a2 d1gv4a2 d1gv4a1 d2gv8a2 d2gv8a1 d1aoga1  
d1aoga2 d1hyua1 d1ebda1 d1ebda2 d3dk9a1 d1q1ra2 d1q1ra1 d1gesa1  
d1zbfal d2z1ha\_ d2etja1 d3qioa1 d1j11a\_ d2e41a\_ d1j12a\_ d21sna1  
d1lio2a\_ d1uaxa\_ d2yv0x\_ d1mu2a1 d1ekea\_ d1i39a\_ d1ps9a2 d1o94a2  
d1cjc1 d1pn0a1 d1reoa1 d1ju2a1 d2f5va1 d3c96a1 d2gmha1 d1pj5a2  
d1o5wa1 d1n4wa1 d1k0ia1 d2dw4a2 d2ivda1 d1seza1 d2voua1 d1kdga1  
d1s5ja1 d2hbja2 d2igia\_ d1wlja\_ d1qhta1 d4dlea1 d1tgoa1 d2f96a1  
d3tr8a1 d3mxma\_ d1q8ia1 d1y97a1 d1w0ha\_ d1kfsa1 d2py5a1 d1noya\_  
d1d5aa1 d1yt3a3 d2guia\_ d3mwpa1 d4kb1a\_ glapy.1 d3ljqa\_ glk2x.1  
d1v58a1 d1t3ba1 d4ilfa2 d4npba2 d4iuua3 d4bvva\_ d5hpga\_ d3k65a\_  
d1ki0a3 d1ki0a2 d1ki0a1 d1a0ha1 d1pmla\_ d3sp8a3 d2feba1 d1r7ha\_  
d1faaa\_ d1wika1 d1xfla\_ d1ttza1 d2f51a1 d1ti3a\_ d1nhoa\_ d1sena\_  
d2i4aa\_ d1ep7a\_ d1zmaa1 d1fo5a\_ d3lefa1 d3diea1 d2yana1 d1z6na1  
d1oaza\_ d3zywa1 d4aj8a\_ d1nm3a1 d4fiwa\_ d1wmja\_ d4hs1a1 d1liloa\_  
d1xwaa1 d1wjka1 d2vmla\_ d1fb6a\_ d1gh2a\_ d1h75a\_ d1nw2a\_ d1kx5b\_  
d3a6na\_ d4m6ba2 d2nqbd\_ d3wkjd\_ d2yfwe\_ d4h9na\_ d5bnxa\_ d1kx5c\_  
d3r45a\_ d1eqzb\_ d4jjnb\_ d1f66c\_ d1eqza\_ d4wnnb\_ d1kx5a\_ d1u35c1  
d1id3a\_ d2nqbc\_ d1tafa\_ d1bh9b\_ d1tafb\_ d1jf1b\_ d1h3ob\_ d2byka1  
d1n1ja\_ d4g92b\_ d1bh9a\_ d1jfia\_ d1h3oa\_ d2bykb1 d1n1jb\_ d1pd212  
d1nhya2 d2a2ra2 d1k0dd2 d1f2ea2 d1gsua2 d1f3ba2 d2fhea2 d2pvqa1  
d1tw9a2 d1oyja2 d1e6ba2 d1k0ma2 d3ik7a1 d4is0a1 d1r5aa2 d1jlva2  
d1m0ua2 d3gtub2 d1z9ha2 d1okta2 d1axda2 d2gsra2 d1tu7a2 d1k3ya2  
d1zgma1 d1gnwa2 d1gwca2 d2gsta2 d1glqa2 d1oe8a2 d1pn9a2 d1v2aa2  
d1fw1a2 d1duga2 d3vrda1 d3vrda2 d1fcdc2 d1fcdc1 d1h1oa2 d1h1oa1  
d1m70a1 d1ig8a1 d1czan2 d1czan3 d1czan1 d1czan4 d1bg3a4 d1bg3a3  
d1bg3a2 d1bg3a1 d4ilya\_ d1chka\_ d4olta\_ d1qqya\_ d1gd6a\_ d1f6ra\_  
d1livma\_ d2gv0a\_ d1iiza\_ d2z2fa\_ d1j8xa\_ d1ghla\_ d1b9oa\_ d1741a\_  
d1691a\_ d2o4wa\_ d1p37a\_ d1k28a3 d1xjta1 d1jtma\_ d2f2qa\_ d4e97a1  
d2pjsa1 d2i7ra1 d1ecsa\_ d1xqaa1 d5cj3a1 d1npba\_ d1jifa\_ d2p7oa\_  
d1r9ca\_ d1nkia\_ d1mpya2 d1kw3b2 d1kw3b1 d4ghga1 d1tfza1 d3isqa1  
d3isqa2 d1sqia1 d1sqia2 d1lkda2 d1lkda1 d1mpya1 d1cjxa2 d1cjxa1  
d1sp9b2 d1t47a1 d1t47a2 d1f1ua2 d1sp8a1 d1sp8a2 d1pv8a\_ d1w5qa\_  
d2c1ha\_ d1l6sa\_ d1qsta\_ d2beia1 d4m3sa\_ d1u6ma1 d1ygha\_ d1yk3a1  
d3dr6a\_ d1xmta\_ d1z4ea1 d2ge3a1 d1bo4a\_ d2fiaa1 d2jdca1 d1y9wa1  
d3to7a\_ d1wwza1 d2f14a1 d2ozua1 d2b5ga\_ d2cy2a1 d2p0wa\_ d1cm0a\_  
d4pswa\_ d1yrea1 d1yr0a1 d1m4ia\_ d2gana1 d1yvka1 d1ghea\_ d2g3aa1  
d1y7ra1 d2euia1 d1q2ya\_ d2fsra1 d1xeba\_ d2ae6a1 d1cjwa\_ d1qsmo\_  
d2aj6a1 d1y9ka1 d1i12a\_ d1vkca\_ d2atra1 d1n71a\_ d2d4pa1 d2fiwa1  
d2fe7a1 d1tiqa1 d2ou2a\_ d1yx0a1 d2fcka1 d1p0ha\_ d2j8ma\_ d2pq8a\_  
d1z4ra1 d1s3za1 d1ufha\_ d2hqya1 d2hqya2 d1ne9a1 d1lrza3 d1ne9a2  
d1xvqa1 d1pn0a2 d3hy2a\_ d2cvba1 d1o8xa\_ d1lu4a\_ d1we0a1 d2bmxal  
d2a4va1 d1psqa\_ d1xiya1 d1q98a\_ d1n8ja\_ d1zofa1 d2ggta\_ d3tjja\_  
d4jela1 d1o73a\_ d3s9fa\_ d2zcta\_ d1qmva\_ d1jfua\_ d2b1ka\_ d5dvba1

d2b5xa1 d2v2ga\_ d1st9a\_ d3tb2a\_ d4llra\_ d4fh8a1 d1e2ya\_ d1knga\_  
d2h30a\_ d1i5ga\_ d2z9sa\_ d2f8aa1 d1tp9a1 d2b7ka\_ d1nm3a2 d3hvva\_  
d2wfca1 d4kcea\_ d1xvwa1 d4gqca1 d3qpma\_ d4k1fa\_ d1zzoa1 d1gp1a\_  
d1prxa\_ d4od7a1 d1z6ma1 d4mcua1 d4dvca1 d1r4wa\_ d3l9sa\_ d3rppa\_  
d2qked\_ d4ksoa\_ d1t4za1 d1wwja\_ d1f74a\_ d3l21a\_ d2e1da\_ d1to3a1  
d1w3ia\_ d1sfla\_ d1n7ka\_ d1vcva1 d4imea\_ d1wa3a\_ d2ocza1 d1f2ja\_  
d3m16a\_ d2yxga\_ d1ub3a\_ d3a5fa\_ d1fbaa\_ d1l6wa\_ d1xfba1 d1wx0a1  
d1vpxa1 d1ojxa\_ d2a4aa1 d1xkya1 d3cq0a1 d3s1xa\_ d1f05a\_ d1fdja\_  
d3cpra1 d4d2ja\_ d1cg2a1 d1yloa2 d1y7ea2 d1y0ya3 d1lfwa1 d1vixa1  
d1fnoa4 d1vh0a2 d1ysja1 d1vhea2 d1z21a1 d2fvga2 d1vgya1 d1r3na1  
d2grea2 d1xmba1 g1q7l.1 d1rtqa\_ d1w52x1 d2ppla1 d1hpla2 d1lpbb2  
d2oxea1 d1bu8a2 d1rpla2 d1ysl1x\_ d4hs9a\_ d1ispa\_ d1ex9a\_ d1ku0a\_  
d3qmma\_ d1ra6a\_ d1muka\_ d3gsza\_ d1khva\_ d1te9a\_ d2xwha\_ d3uqsa\_  
d3hkwa\_ d3n6ma\_ d2cjqa\_ d2xyma\_ d1teba\_ d1te8a\_ d1s48a\_ d1u09a1  
d4wfxa\_ d3tyqa\_ d2pgga1 d1lgya\_ d4l3wa\_ d1llfa\_ d1gz7a\_ d1ukca\_  
d2ftba\_ d1mpa\_ d2rcqa1 d1fdqa\_ d4lkpa\_ d1sa8a\_ d1vyfa\_ d1lpja\_  
d3vg7a1 d4azqa1 d1o8va\_ d5bvqa\_ d1p6pa\_ d2qo4a\_ d1opba\_ d1yiva1  
d1o1va\_ d4bvma1 d4tkba\_ d4i3ba\_ d1bwya\_ d1ftpa\_ d1ggla\_ d4gkca\_  
d1cbia\_ d3p6da1 d1kqwa\_ d2a0aa1 d3p0ya1 d1igra1 d1igra2 d1n8yc2  
d1n8yc1 d1m6ba2 d1m6ba1 d4dv8a2 d1dzka\_ d4tlja\_ d2a2ua\_ d4wfva\_  
d3t1da\_ d4iaxa\_ d3zq3a\_ d2nnda\_ d1i4ua\_ d1kxoa\_ d1bbpa\_ d1kt7a\_  
d1exsa\_ d3s26a1 d1lf7a\_ d1qfta\_ d4gh7a\_ d1z24a1 d1qabe\_ d1xkia\_  
d1ew3a\_ d3bx7a\_ d4iawa1 d1n0sa\_ d1gkab\_ d3kzaa\_ d2k23a\_ d2l9ca1  
d2joza1 d1gm6a\_ d3kffa\_ d3saoa1 d1e5pa\_ d1yupa1 d1iia\_ d2tbvc\_  
d1x36a\_ d1smvc\_ d1ng0c\_ d4sbvc\_ d1lopa\_ d1f2nc\_ d1cixa\_ d1y29a\_  
d1v7fa\_ d2jtba\_ d1g9pa\_ d1lupa\_ d1qk7a\_ d1mb6a\_ d2a2va\_ d1niya\_  
d1i25a\_ d1hvwa\_ d2mpqa\_ d1ie6a\_ d1kqha\_ d1la4a\_ d2mxoa1 d1dl0a\_  
d1koza\_ d1qk6a\_ d1emxa\_ d1lqra\_ d1c6wa\_ d1rmka\_ d1ixta\_ d1eyoa\_  
d1cna\_ d1fu3a\_ d1g1pa\_ d1f3ka\_ d1fyga\_ d1rypd\_ d1irua\_ d1rypc\_  
d3unfk\_ d1rypa\_ d1j2pa\_ d1irui\_ d1j2qh\_ d3unfh\_ d1m4ya\_ d1rypb\_  
d1lirul\_ d1lirug\_ d1liru2\_ d1q5rh\_ d1rypg\_ d1g3ka\_ d1q5qa\_ d1e94a\_  
d1lirub\_ d1ryph\_ d3ty6a\_ d1liruj\_ d1liruk\_ d1rype\_ d1lirud\_ d1lirue\_  
d3mi01\_ d1rypf\_ d1liruh\_ d2z3ba\_ d1liruc\_ d3mka2\_ d1liru1\_ glor0.1  
g1cp9.1 g1e3a.1 d1jgta2 d1ofda3 d1ea0a3 d1q15a2 d1ct9a2 d1ao0a2  
d1te5a\_ d1y14b1 d2nn6i1 d1i94l\_ d2zjra2 d1smxa\_ d2qamc2 d1hh2p1  
d2r7da1 d1rl2a2 d1wfga1 d3bzka4 d1x6oa2 d3a0ja\_ d2j01d2 d2ja9a1  
d4q15a\_ d1hr0w\_ d1luz\_ d2n3sa\_ d2vnud1 d1h95a\_ d1go3e1 d2nn6h1  
d1ne3a\_ d2mo1a\_ d1liz6a2 d1jjga\_ d1e3pa2 d2ix0a3 d2ix0a2 d2lxja\_  
d1ueba3 d1ueba2 d2z0sa1 d1u01a1 d2ix0a1 d2eifa2 d2je6i1 d3i2za1  
d2c35b1 d2ahob2 d1t9ha1 d3i4oa\_ d2qall1 d1jt8a\_ d2nn6g1 d1g6pa\_  
d3cama\_ d1i94q\_ d1c9oa\_ d1d7qa\_ d2ba0a1 d2vnud2 d2vnud3 d1khia2  
d2qalq1 d1wi5a1 d1xta2 d1ny4a\_ d4w9ta\_ d1jvna1 d4x2ra1 d1qo2a\_  
d4axka1 d1thfd\_ d1h5ya\_ d4u28a\_ d2y88a\_ d4wd0a\_ d1vzwa1 d3ia2a\_  
d4dggal d1hkha\_ d1zoia\_ d2flia1 d1rpxa\_ d1tqja\_ d1tqxa\_ d4lt9a1

d3tc7a1 d3hoja\_ d1i4na\_ d3vnda\_ d3n18a1 d3nava1 d1v5xa\_ d4a2ra1  
d3tc6a1 d1ujpa\_ d4ijba\_ d1xcfa\_ d1vc4a\_ d1rd5a\_ d1qopa\_ d3b5va\_  
d3gv5b1 d1t94a2 d3bq0a2 d4lmbx\_ d1cpcb\_ d3v57a\_ d1kn1a\_ d1cpca\_  
d4f0ta\_ d2vjha\_ d4po5b\_ d1eyxa\_ d1alla\_ d4f0tb\_ d1b33b\_ d1b8db\_  
d4h0mb\_ d1b33a\_ d2vjhb\_ d4lm6b\_ d2vmlb\_ d1allb\_ d2vjta\_ d3dbja\_  
d2vmla\_ d2vjtb\_ d4f0ub\_ d1f99b\_ d4rmpa1 d1liaa\_ d1eyxb\_ d2uulb\_  
d4lmsb\_ d4f0ua\_ d2bv8a\_ d1f99a\_ d2bv8b\_ d2c71b\_ d3dbjb\_ d4rmpb1  
d1b8da\_ d4h0ma\_ d3v57b\_ d1kn1b\_ d2uula\_ d2j96a\_ g1gxs.1 d2xqfa\_  
d1ea5a\_ d1f6wa\_ d1dx4a\_ d1k4ya\_ d4qwwa\_ d2ha2a\_ d3c8da2 d2pbla1  
d1jkma\_ d1jjia\_ d1jjfa\_ d1gkub1 d1gkub2 d2qvba\_ d2v9za\_ d4kafa1  
d1b9ra\_ d1frra\_ d3wcqa\_ d1e9ma\_ d1l5pa\_ d1wria\_ d1i7ha\_ d3av8a\_  
d1czpa\_ d1rfka\_ d3p1ma1 d3b2ga\_ d2bt6a2 d1s5ja2 d1qhta2 d4dlea2  
d1tgoa2 d3py8a2 d1q8ia2 d1kfsa2 d2py5a2 d1d5aa2 d2m5ta\_ d1cqqa\_  
d1wqsa\_ d5bpea\_ d2ipha\_ d2bhga1 d3tnta\_ d3sjia\_ d3d23a1 d2fyqa\_  
d3tloa\_ d3zvea1 d2hrva\_ d3q3ya1 d4asha1 d1e88a1 d1l6ja5 d1l6ja4  
d1eaka4 d1eaka3 d1l6ja3 d1h8pa2 d3rp2a\_ glucy.1 d1fuja\_ d2zchp\_  
d3w94a\_ d1si5h\_ d1lo6a\_ g2pka.1 d1cgha\_ d1kigh\_ d1a5ia\_ d3s9ba\_  
d1hj8a\_ d1ao5a\_ d2anya\_ d1q3xa1 d1gvza\_ d1azza\_ d4gsoa\_ d2f91a1  
d1iaua\_ d1gdna\_ d1eufa\_ g1fiw.1 d1eq9a\_ d4nfea\_ d2rdla\_ d1spja\_  
d1elva1 d1a7sa\_ d1ekbb\_ d1pfxc\_ d1yc0a\_ d2aiqa\_ g1fiz.1 d1fi8a\_  
d4k60a\_ d4dgja\_ d1mzaa\_ d1op0a\_ d3tjva\_ d1pytd\_ d1sgfg\_ g1gg6.1  
d2eeka\_ g1rtf.1 d1a0ja\_ d3g01a\_ d1pytc\_ d4e7na\_ d1ddja\_ d1z8ga1  
d1npma\_ d1brup\_ g1jou.1 d1sgfa\_ d1autc\_ g2hnt.1 g1kdq.1 d1orfa\_  
d3s69a\_ d4crga\_ d1fxya\_ d1bqya\_ d1svpa\_ d1mbma\_ d3su6a1 d1cu1a1  
d4agka\_ d1vcpa\_ d1q31a\_ g1n11.1 d3e90b\_ d1ep5a\_ d3u1jb\_ d2bk7a\_  
d3fjua\_ d1z5ra1 d1kwma1 d1uwya2 d1jqga1 d2c1ca1 d1dtda\_ d1h81a2  
d3lgia\_ d3i77a\_ d2z9ia2 d4nsva\_ d1lcya2 d4jcna\_ d1agja\_ d1os8a\_  
d1hpga\_ d1p3ca\_ d1l1ja\_ d1qtfa\_ d1e69a\_ d1mv5a\_ d3g60a4 g1ii8.1  
d1ewqa2 d1ji0a\_ d1qhla\_ d1v43a3 d2wmfa1 d1vpla\_ d1g2912 d4a82a2  
g1f2t.1 d2d62a1 d3tuic1 d2bbsa1 d3g60a3 d2ixea\_ d1g6ha\_ d1sgwa1  
d2qi9c\_ d3rlfa1 d3b60a1 d3d31a2 d2pzea1 g1xew.1 d1jj7a\_ d1oxk2  
d2onka1 d1wlwa\_ d1iwea\_ d1qf5a\_ d1vmaa2 d1nija1 d1np6a\_ d2p67a1  
d3ihla\_ d1okkd2 d1l1sa2 d1s1ma2 d1liona\_ d2v40a\_ d1dj3a\_ d3hida\_  
d2vola1 d2g0ta1 d1vcoa2 d1j8mf2 d1g3qa\_ d1xjca\_ d1p9ba\_ d1qzxa3  
d1ihua2 d2qm8a\_ d1dj2a\_ d4ioja\_ d1cp2a\_ d1yrba2 d1hyqa\_ d3gqba2  
d1xp8a1 d1tf7a2 d1tf7a1 d1ye8a1 d1skyb3 d2qe7d2 d4blta\_ d4huta\_  
d3l1daa2 d4hyya\_ d2i3ba1 d1cr1a\_ d3j9tb2 d3ntua2 d1vdza1 d2z43a\_  
d1e9ra\_ d1nlfa\_ d3ziaa2 d1n0wa\_ d1g6oa\_ d3ziad2 d3j9ta2 d1pzna2  
d3gqbb2 d2i49a\_ d1nnfa\_ d1xvxa\_ d1ursa\_ d1h3da1 d1iuda\_ d4m1va1  
d1twya\_ d3e13x\_ d2nxoa1 d4pfua\_ d3ttma\_ d1elja\_ d2qmwa1 d1us5a\_  
d1y3na1 d1jeta\_ d1uqwa\_ d4f19a1 d2esna2 d3thia\_ d3fasa1 d2uyeb\_  
d2xwva1 d1r91a\_ d2fyia1 d1pb7a\_ d2ozza1 d1sw5a\_ d1nh8a1 d1vr5a1  
d2g29a\_ d1xs5a\_ d3lswa\_ d2z23a\_ d3w9va\_ d3tcha\_ d1q35a\_ d1z7me1  
d3q27a\_ d1p99a\_ d1ve4a1 d2i6ea1 d4mcoa1 d4n8ya\_ d1eu8a\_ d1zba1



d1hsla\_ dlixca2 d1j1na\_ d1xvya\_ d1y9ua\_ d2z22a1 d1xoca1 d4oera\_  
d5f1qa1 d1xt8a1 d1i6aa\_ d4gwoa\_ d4igta1 d1pc3a\_ d4mmpa1 d1o63a\_  
d2czla1 d2onsa2 d4mija1 d1eh3a\_ d3skpa\_ d1dtza1 d1ieja\_ d1jnfa2  
d1ce2a1 d1jnfa1 d1b1xa2 d1b1xa1 d1jw1a1 d1jw1a2 d1ryoa\_ d1h76a1  
d1h76a2 d1c4oa1 d2p6ra3 d2p6ra4 d1oywa2 d1oywa3 d1wrba1 d1w36b2  
d1w36b1 d1c4oa2 d3bora\_ d1t6na\_ d2eyqa5 d2eyqa3 d2eyqa2 d2zu6a2  
d1veca\_ d1uaaa1 d1w36d1 d2g9na1 d1z3ix2 d2rb4a\_ d1hv8a1 d1t5ia\_  
d1w36c2 d2j0sa2 d2j0sa1 d1fuka\_ d3hjha1 d1z5za1 d1qdea\_ d1z63a1  
d1s2ma2 d1s2ma1 d1wp9a1 d1wp9a2 d1gm5a3 d1gm5a4 d3dina4 d3dina3  
d1q0ua\_ d1w36c1 d1z3ix1 d1nkta3 d1nkta4 d1uaaa2 d1w36d2 g1qhh.1  
d2fwra2 d2fwra1 d3q3ma\_ d1za0a1 d1mxra\_ d2inca\_ d1jk0a\_ d2incb\_  
d1mhyb\_ d3hf1b\_ d1mtyb\_ d1r2fa\_ d2uw1a\_ d1mhyd\_ d3n37a\_ d1afra\_  
d1oquc\_ d1syya\_ d1mtyd\_ d2o1za\_ d1uzra\_ d1smsa\_ d2fkza\_ d1zujal  
d1s3qa1 d2fjca1 d1z6om1 d1veia\_ d4dyya\_ d1jiga\_ d3gvya\_ d2pyba\_  
d4cy9a1 d3bvfa1 d1r03a\_ d2cf7a\_ d1nf4a\_ d1zs3a1 d4iwka\_ d3ka8a\_  
d3np0x\_ d1n1qa\_ d11b3a\_ d4e6ka\_ d1z6oa1 d2fzfa1 d4dyua\_ d3ge4a\_  
d1jgca\_ d4am4a\_ d2z6ma\_ d1ji5a\_ d1vlga\_ d11koa1 d3qz3a\_ d1o9ra\_  
d2ffxj\_ d1euma\_ d1yv1a1 d2v2pa\_ d1j30a\_ d4di0a\_ d1dpsa\_ d2cbia2  
d2choa2 d118na1 d1oewa\_ d2qzxa\_ d2asia\_ d1psoe\_ d1smra\_ d2h6ta\_  
d1pfza\_ d1izda\_ d3hd8a\_ d1j71a\_ d1dpja\_ d4aa9a\_ d1t6ex\_ g1b5f.1  
g1lya.1 g1htr.1 d1qdma2 d1bxoa\_ d1wkra\_ d1tzsa\_ d1libqa\_ d2qzwa\_  
d3ggta\_ d3ixoa\_ d1mrx\_ d2haha\_ d1tw7a\_ d4njsa\_ d1sgua\_ d2p3da\_  
d1nsoa\_ d3d3ta\_ d2rkfa\_ d1c6ya\_ d2rspa\_ d3ogpa\_ d3ekwa\_ d2o4na\_  
d2j9ja\_ d1baia\_ d3ggua\_ d3lzua\_ d4npua\_ d4j55a\_ d2r8na\_ d2fxda\_  
d2p3ca\_ d4dqea\_ d3ttpa\_ d3t3ca\_ d2p3aa\_ d2hc0a\_ d2fdda\_ d3mwsa\_  
d1k8rb\_ d1wgra1 d1ef5a\_ d1wfy1 d1e8ya3 d1wgya1 d2cs4a1 d1wxma1  
d2byea1 d3kh0a1 d2byfa1 d1wxaa1 d1e7ua3 d1h4ra3 d4y18a1 d2a16a3  
d1wgda1 d1wga1 d4q5eb\_ d1wjna1 d1se9a\_ d3n3kb\_ d1wz0a1 d1we6a1  
d2m0xa\_ d2gbka\_ d3rt3b1 d1wh3a1 d1sifa\_ d2ekek2 d4ii2b1 d4hk2a1  
d1c3ta\_ d1m94a\_ d1wgha1 d1ttna1 d1wx8a1 d3v6cb1 d2ma9b\_ d4i61b1  
d1bt0a\_ d2jvca1 d1iyfa\_ d2k1fa\_ d1wxva1 d1wf9a1 d1t0ya\_ d2io0b2  
d1x1ma1 d2gbma\_ d1zw7a1 d2m17a\_ d1ud7a\_ d1we7a1 d21wpa\_ d2gbja\_  
d1wjua1 d1v6ea1 d1v86a1 d4eewa\_ d1wiaa1 d4icva\_ d4gu2a\_ d1wx7a1  
d1wy8a1 d4hjka1 d2faza1 d1v5oa1 d3ruib\_ d1eo6a\_ d3waob\_ d2r2qa1  
d3m95a\_ d3wana\_ d3nqyb\_ d4gera\_ d1yvca1 d1yeza1 d1g66a\_ d1qoza\_  
d5ajha1 d4lu0a\_ d1of8a\_ d3unda1 d3e9aa1 d1vr6a2 d2qkfa\_ d1d9ea\_  
d1o60a\_ d1wioa4 d1ccza2 d1vcaa1 d1dr9a2 d2d9qb1 d2nxyb2 d1um8a\_  
d1ixza\_ d1qvra2 d1qvra3 d1qzma\_ d1sxjc2 d1jr3d2 d2p65a\_ d118qa2  
d1g8pa\_ d3hu3a3 d1sxjd2 d1njfa\_ d1in4a2 d1sxja2 d1tuea1 d2ce7a2  
d1w5sa2 d1sxjb2 d1d2na\_ d1ny5a2 d2gnoa2 d2a5yb3 d1fnna2 d1u0ja1  
d11v7a\_ d1iqpa2 d2fnna2 d1ixsb2 d4gita\_ d1sxje2 d1g41a\_ d21j7a\_  
d1n4na\_ d2m8bb1 d2kyqa\_ d3psma\_ d1jkza\_ d1jxca\_ d2g11a\_ d4uj0a\_  
d2k4ua\_ d1hp2a\_ d21u9a\_ d1baha\_ d2meoa1 d1wm7a\_ d1hlya\_ d1n8ma\_  
d1jlza\_ d1wpda\_ d1c55a\_ d1pvza\_ d1wt7a\_ d1rjia\_ d1wz5a\_ d1m2sa\_

d1pjva\_ d1c49a\_ d1qkya\_ d2ktca1 d1wmta\_ d1du9a\_ d1j5ja\_ d1rlga\_  
d1t0za\_ d2i61a\_ d1t1ta\_ d1sn4a\_ d1kv0a\_ d2lkba\_ d1npia\_ d1wwna\_  
d1pe4a\_ d2kbka\_ d2li7a\_ d1djta\_ d2kbha\_ d1dq7a\_ d1sega\_ d1omya\_  
d1zywa1 d1jzaa\_ d1n9wa1 d1bbua1 d1e1oa1 d1b8aa1 d1l0wa1 d3a74a1  
d1eova1 d2h0ba\_ d2erfa\_ d1h30a1 d3mw4a1 d1pz7a\_ d2r1ba\_ d3v64a1  
d1d2sa\_ d3bopa1 d3mw3a1 d1okqa1 d1okqa2 d1iyjb4 d1iyjb5 d1iyjb3  
d1o7ia\_ d4ipca1 d1x3ea\_ d4apva\_ d1jb7a1 d1jb7a2 d1jb7a3 d3kdfa\_  
d1ue1b\_ d1wjja1 d3eiva\_ d1xjva2 d1xjva1 d2ccza2 d1se8a\_ d1l1oc\_  
d1jb7b\_ d1qvca\_ d3ulla\_ d1qzga\_ d1miua4 d1miua5 d1miua3 d3g48a1  
d1gd7a\_ d1mkha\_ d1jjcb3 d3ubub\_ d1legia\_ d1qo3c\_ d1v7pa\_ d1tdqb\_  
d3ubua\_ d1c3ab\_ d1h8ua\_ d3bx4b\_ d1t8ca1 d1sb2a1 d1qdda\_ d2ziba1  
d3cada\_ d1byfa\_ d1j34b\_ d1jwia\_ d1jzna\_ d1c3aa\_ d1oz7b\_ d1wmza\_  
d3bdwb\_ d1hq8a\_ d1fifa1 d1dv8a\_ d3hupa\_ d1wk1a1 d1umra\_ d2afpa\_  
d3bx4a\_ d1gz2a\_ d1sl6a\_ d1v7pb\_ d3g8ka\_ d1ixxa\_ d1j34a\_ d1jwib\_  
d1g1sa1 d1y17a1 d1ja3a\_ d1fvub\_ d3bdwa\_ d1sb2b1 d1fvua\_ d1umrc\_  
d1oz7a\_ d4m17a\_ d3cfwa1 d1ypqa1 d1g1ta1 d3fd4a\_ d3l9jc\_ d4dn8a1  
d1v41b\_ d1rd1l\_ d2msba\_ d1dgsa2 d1fvial1 d1ckma1 d1x9na2 d1pfsa\_  
d2a1ka\_ d1je5a\_ d1rpma\_ d2shpa1 d1yfoa\_ d2ooqa1 d1g4us2 d1p15a\_  
d1lara2 d1lara1 d1wcha\_ d2fh7a2 d2fh7a1 d1ohea1 d1ohea2 d2f4da\_  
d1rxda\_ d2hxpa\_ d1xria\_ d1fpza\_ d3ezza\_ d4y2ea\_ d1i9sa\_ d3azya\_  
d3wvja\_ d1upsa1 d1ajoa\_ d2hyka\_ d2vy0a\_ d1o4ya\_ d3o5sa\_ d3d6ea\_  
d3atga\_ d1dypa\_ d1umza\_ d3i4ia\_ d1c1la\_ d4lbqa\_ d1slta\_ d4no4a\_  
d3zsja\_ d3duia\_ d1g86a\_ d1lis3a\_ d1qmja\_ d1hlca\_ d1tdha3 d1q3ba3  
d1ee8a3 g1len.1 d3zyra\_ d1fnya\_ d1n47a\_ g21tn.1 d1avba\_ d3usua\_  
d1dhkb\_ d1f9ka\_ d1lukga\_ d1g8wa\_ d1g9fa\_ d1wbfa\_ d3wcsa\_ d1g7ya\_  
g1loe.1 d1mvqa\_ d1hq1a\_ d1v6ia\_ d1dbna\_ d1qnwa\_ d1fx5a\_ d4l8qa\_  
d1ioaa\_ d3n35a\_ d3ubra\_ d1qo8a1 d1d4ca1 d2k3va\_ d1ft5a\_ d1qdba\_  
d1m1qa\_ d2j7aa\_ d1h21a\_ d1ogyb\_ d4fasa\_ d1jnia\_ d1oaha\_ d1sp3a\_  
d3h33a\_ d1rwja\_ d19hca\_ d1os6a\_ d3bxua\_ d3h4na\_ d1i77a\_ d3caoa\_  
d2ctha\_ d1duwa\_ d1ofwa\_ d2e84a\_ d1hh5a\_ d1gyoa\_ d3h34a\_ d1dszb\_  
d1a6ya\_ d3cbba\_ d1ynwa1 d1r4ia\_ d2hana\_ d2hanb\_ d2enva1 d1kb4b\_  
d2n11b\_ d1l01a\_ d1cita\_ d1adqa1 d1fnga1 d1uvqb1 d1zs8a1 d2vola1  
d2vola2 d1mfbl2 d2jelh2 d1uwel2 d3qq4b1 d1kjvb\_ d1k5na1 d1osph2  
d4odh12 d1ow0a1 d1ow0a2 d1bfob2 d3l9ra2 d3jtth1 d2fath2 d4elkb2  
d1fn4b2 d2xfxb\_ d1pg7x2 d1cqka\_ d4k71b2 d1lk2a1 d1eapb2 d4lfhg2  
d1i4fa1 d2nw2a2 d1kfah2 d1mhca1 d1h3ua1 d1wejh2 d1h0db2 d1a5fh2  
d1kcvh2 d1mjuh2 d1qqda1 d1kcrh2 d1k8ia1 d3huja2 d2nnab1 d1nfd2  
d3mffb2 d1s9va1 d1lk3h2 d1q0x12 d1fv1b1 d1neza1 d4rfeb2 d1r3ha1  
d1a6tb2 d1kjva1 d1pz5b2 d1onqa1 d2bc4a2 d1de4a1 d1k8da1 d1tcra2  
d1dn0b2 d1nfde2 d2xwtb2 d1bfoa2 d1mexh2 d1iakb1 d1ypzf2 d4f7ea2  
d1q72l2 d2fbjh2 d1fe8h2 d1clzh2 d1fngb1 d1uvqa1 d1vgka1 d1c16a1  
d4j12a2 d4x99b2 d1igtb3 d1je6a1 d1q72h2 d1nldh2 d1teth2 d2hmic2  
d1i1ca2 d1i1ca1 d1k8ib1 d1q0yh2 d1kfa12 d3frua1 d1pg7w2 d1u58a1  
d1igyb4 d1igyb3 d1hyrc1 d1klub1 d1deeb2 d1c12b2 d2bc4b2 d2ig2h2

d1kcv12 d3wn5b1 d11k2b\_ d11k312 d1mjul2 d1sm3h2 d1q0xh2 d1zvsal  
d1ydpal d1u8ib2 d1ypze2 d1kcuh2 d1lop9a\_ d1y01a1 d1letzb1 d1legj11  
d2gsib1 d1nj9a1 d4jfhd1 d1aqk11 d1t2ja\_ d11o4h1 d1zvyal d3v4vl1  
d4enec1 d1kxtb\_ d5e8ea1 d2pxya\_ d4weud\_ d1xiwc\_ d2esvd1 d1qznh\_  
d1ogae1 d1f4xh1 d4n1hb\_ d3ezjb1 d3mlw11 d1kfah1 d1etza1 d1b4jh1  
d3cfic\_ d4w68a\_ d2arja1 d1ek3a\_ d2ok011 d1vera\_ d1uwgh1 d1blnb1  
d1fpth1 d1rzga1 d2giya1 d4m3kb1 d1nc2a1 d2nyyd1 d1ncna\_ d1fbih1  
d5dxwa\_ d4fqqa1 d1dqdh1 d1jfq11 d1kelh1 d1faih1 d1frgl1 d1figl1  
d4m6n11 d1fo0a\_ d4hxb11 d3b5ga\_ d3quyd1 d2h9gb1 d1i8kb\_ d2dd8h1  
d2ck0h1 d1eaja\_ d4w6wb1 d2a6ib3 d1t66d1 d2e27h\_ d1ob1b1 d1f11b1  
d2v7na1 d1ad0a1 d2xt1b1 d1pskh1 d4i13b1 d2op411 d1a0q11 d1uwel1  
d1za3a1 d1ncb11 d4uu9a\_ d1bm3h1 d1cloh1 d1nqba2 d1cf8h1 d4y5va\_  
d1mhph1 d5anma1 d4cdgc1 d4ldeb\_ d1y01b1 d2pcpb1 d1z3gl1 d1dfb11  
d1fh5h1 d3g5xa1 d1tzib1 d4dn311 d3zhka1 d2b1hh1 d2uylal d1f3dh1  
d1nj9b1 d2agjh1 d2h1pl1 d1q72h1 d8fab11 d1ndmb1 d1rjca1 d4u6hb1  
d3upca\_ d2fbj11 d1osph1 d1tvda\_ d2cjev\_ d4fhbd1 d1bd2d1 d1rz7h1  
d3nn8a\_ d1blna1 d1knoa1 d1nfda1 d2bmkb1 d1dq11\_ d1igyb1 d1igf11  
d12e8h1 d3utzal d1nc2b1 d1rihh1 d4mwfb1 d4jvpa1 d1mieh1 d1rhfa1  
d1fgn11 d1sbsh1 d1lp9e1 d1dn0a1 d4lqf11 d1iaih1 d1kgcd1 d1mh5b1  
d1gpo11 d2g60h3 d1f8t11 d2jixd1 d4grwh\_ d1fo0b\_ d1bfob1 d1axsa1  
d1u9ka\_ d1nmbh\_ d1h8na1 d1h8na2 d1jguh1 d4eural d3sdy11 d35c8h1  
d1w7211 d1mvub\_ d1i9rh1 d1ob1a1 d4wenb\_ d1yeeh1 d3ietc1 d1f58h1  
d1ad0b1 d1mqk1\_ d1nbvh1 d4b50a\_ d3r8bb\_ d1baf11 d1mamh1 d4rgne1  
d2gsgb\_ d35c811 d1bafh1 d1aih1 d2pcpa1 d2fath1 d2x1pa\_ d1orsb1  
d1ibgl1 d1shma\_ d1a2yb\_ d1u0qa\_ d2coqa\_ d1hilb1 d1qfwi\_ d1jv5b\_  
d1fn4b1 d5e0qa\_ d1nsnh1 d1plgl1 d4ocx11 d1kb5h1 d1rzzf1 d1pg7x1  
d2fx7h1 d2oi9c\_ d117i11 d3eyva1 d1d5i11 d4ffyl\_ d1tet11 d1a6wh\_  
d1ac6a\_ d3dvfa\_ d1nfde1 d1mimh1 d1ri8a1 d1jhlh\_ d3dura\_ d1fskb1  
d1f97a1 d3so3b1 d2ak4d1 d1lp9f1 d4z7wf1 d117th1 d4y5ya\_ d4x7ec1  
d1emth1 d1ikf11 d1nlbh1 d4utal1 d1bjma1 d1eapb1 d1u6ah1 d2dtgd1  
d1kj2b\_ d1xeda1 d1cleh1 d1fgvh\_ d2bnub1 d2fb4h1 d2dtgb1 d1ktrh\_  
d1jp1h1 d1qkz11 d4hepg\_ d2atpb1 d1flrh1 d2hrp11 d1mvfa\_ d1iaim1  
d3k80a1 d2jb5h1 d3zkxc\_ d4grwe\_ d1it9h1 d1rhhb1 d3w9ec\_ d1e4wh1  
d1sy6h1 d2j6eh1 d3qxta\_ d1jglh1 d1p7ka1 d1tzhb1 d4n8pa1 d1gaf11  
d2jelh1 d1wioa2 d4i0cc1 d1cicb1 d1lmka2 d1lmka1 d1iqwh1 d1lorqb1  
d1ejoh1 d1jnlh1 d4zg1a\_ d43c9b\_ d1ggbl1 d1wejh1 d3q6fa1 d1f3dj1  
d3c61a1 d1bqlh1 d3p9wb\_ d1a3r11 d1h0db1 d2uzil\_ d1eo811 d1qfwl\_  
d1n7m11 d1igja1 d1c5ch1 d2a9mh\_ d1fj1b1 d4heme\_ d1ccza1 d1a5fh1  
d1ogad1 d1dlfh\_ d1qa9b\_ d1vgel1 d3qskb\_ d1sjxa\_ d4ozfg1 d1sq2n\_  
d1qd0a\_ d1kcvh1 d1c5db1 d3qcul1 d8faba1 d3bn9d1 d1mjuh1 d4y8dc\_  
d7fabh1 d3dvgb1 d11o011 d1a6tb1 d1gigh1 d1kcrh1 d2hwz11 d1yjdc1  
d3clfl1 d4krna\_ d1d171\_ d1e6o11 d1mexh1 d3r0ma\_ d4kkna\_ d1fns11  
d1oagh\_ d1rzia1 d1ucbh1 d1ncw11 d4b41a\_ d1nfd1 d2mpah1 d2d7t11  
d4grwf\_ d4b5ea\_ d11k3h1 d3u79a\_ d4u3xa\_ d1ghf11 d1bvkb\_ d1mcww1

d1b88a\_ d1jrhh1 d32c2b1 d4wemb\_ d1dsfh\_ d1op3h1 d1ce1l1 d1iqda1  
d1qoka1 d1qoka2 d1qfuh1 d2crya1 d1ay1h1 d1loaql\_ d3ab0b\_ d1rur11  
d1t4kb1 d1bz7b1 d1n0xh1 d1for11 d1lucb11 d4w6yb\_ d43c9a\_ d2aab11  
d1tzia1 d4n1ca\_ d1k6qh1 d3g9ab\_ d4tvsa1 d1ligmh\_ d1pz5b1 d3dx9a1  
d3wxwh\_ d1nakh1 d1kcul1 d3eaka\_ d4qlra1 d1cr911 d1d9ka\_ d1f4x11  
d1deea1 d2i27n2 d1c12a1 d2orb11 d1j8hd1 d1mcph1 d1c5da1 d1kenh1  
d1bd2e1 d1h5ba\_ d4x7fc1 d3upaa\_ d1t3fa1 d1indh1 d2dtgc1 d4hc111  
d1zv5a1 d4wgvb\_ d1uwgl1 d4f37k1 d1aqkh1 d1vesa\_ d3zkqd\_ d1fpt11  
d1lo411 d1knob1 d3rrqa\_ d1ct8b1 d4orz\_ d1mlbb1 d4hgkc1 d1dgd11  
d1bogb1 d4ozhe1 d1dr9a1 d1i7za1 d1dn0b1 d1kell1 d1rrib1 d1ypzf1  
d1wtla\_ d1hkfa\_ d1fail1 d1figh1 d2vyre\_ d1sjva\_ d1lohqa\_ d1bfoa1  
d1pkqb1 d1mjul1 d1b4j11 d1nsl1 d2arjb1 d1p4bh\_ d4aj0a\_ d3nn8b\_  
d2rcja1 d1f2xk\_ d4v1dd\_ d1adqh1 d2eksa\_ d4k3ga\_ d1jfqh1 d1uweh1  
d1frgh1 d4gftb\_ d1uz8b1 d4n1ea\_ d1bm311 d1clol1 d3mcka1 d2vq1a1  
d1ae6h1 d4aq1b1 d1uj3b1 d1nbqa1 d1fh511 d2ck011 d2ywza\_ d1q7211  
d4nxbx\_ d1hila1 d4hz1b1 d2j8811 d1zmya1 d1cd0a\_ d1a4ka1 d1psk11  
d1a0qh1 d4krmb\_ d1ncbh1 d2fbjh1 d1j8he1 d1i3ua\_ d1cf811 d1fe8h1  
d2p1ya1 d1eeqa\_ d2x89a\_ d1ol0a\_ d2r01h1 d1ub5a1 d1dfbh1 d3eyvb1  
d4jdvb1 d4p2cg\_ d2gsia1 d2agj11 d1u3ha1 d2h1ph1 d1rih11 d1fskc1  
d1boga1 d2a7711 d1osp11 d1qfoa\_ d3dwta\_ d2fx711 d1rz711 d3stba1  
d1pkqa1 d1b6da1 d1dzba2 d1dzba1 d1kj2a\_ d4l1ha\_ d1rzgb1 d1dq1h\_  
d12e811 d1miel1 d1jmaa\_ d1sbs11 d1fgnh1 d1f5811 d1mqkh\_ d1ndgb1  
d3qeg11 d1ia11 d2aw2a1 d1tqbc1 d3fo2a1 d4dkaa\_ d1f8th1 d2g6011  
d2ywy\_ d1uj3a1 d1yc7a\_ d3bd3a\_ d4w6xb1 d1nmb1\_ d1i8ka\_ d1rj1b1  
d1ypze1 d1p7kb1 d1kxqe\_ d1gpoh1 d2z4qa1 d1w72h1 d1i9r11 d4qgya1  
d4xt1c\_ d2qqnh1 d1cica1 d3c08h1 d2cd0a\_ d2bdnh1 d1hnga1 d1mam11  
d1nldh1 d1cr9h1 d4lcih1 d3bkyh1 d3qg711 d1ai111 d1kxvc\_ d4iosd\_  
d117ih1 d2x1qa\_ d1ub6b1 d3k74b\_ d1libgh1 d1teth1 d1lgya1 d1hxma1  
d2x6ma\_ d2e71a\_ d5e03a\_ d1qfwm\_ d2r0kh1 d1igjb1 d1rurh1 d1plgh1  
d1mj8h1 d1yuhb1 d3fmg11 d1rzfl1 d1emt11 d1ad9b1 d1igtb1 d1nlb11  
d1d5ih1 d3k7ua\_ d4ffyh\_ d1bwwa\_ d3dvga1 d1a6ta1 d1fgvl\_ d4qxgl1  
d1mim11 d1jh11\_ d2hffb1 d2hh011 d1qkzh1 d117t11 d1afvh1 d1iaii1  
d2cjuh\_ d1um5h1 d2ghwb2 d2ghwb1 d1kgce1 d2fgwh1 d1ikfh1 d1dvfd\_  
d2i24n1 d2xtjb\_ d1za3b1 d2yc1a\_ d2hh0h1 d2x1oa\_ d1bvka\_ d1rj1a1  
d5e7ba1 d1igta1 d1i11b1 d2fb411 d1mvua\_ d1jpt11 d32c2a1 d1fvca\_  
d1iqdb1 d2hrph1 d2p4ab\_ d4qo1a\_ d1p2cb1 d1wt5c\_ d1t4ka1 d5c1mb\_  
d1it911 d1bz7a1 d1b2wh1 d1e4w11 d1jnl11 d1yedb1 d1za6b1 d3u7aa\_  
d1lignh1 d3gnm11 d1orsa1 d1wejl1 d1a2ya\_ d1hxmb1 d1gafh1 d2j4wh1  
d1pz5a1 d1j05a\_ d1a3rh1 d4fq111 d1qfwh\_ d1eo8h1 d1n7mh1 d4s11a\_  
d1kegh1 d5da4a\_ d1iqw11 d3whxb1 d1vgeh1 d1deeb1 d1c12b1 d1t2q11  
d1ad9a1 d3gsnb1 d3b2uc1 d1ggbh1 d1t3fb1 d1nak11 d4ocmc\_ d1lila1  
d2v7hb3 d2esve1 d1mcoh1 d2qr0b1 d2q3aa\_ d1ct8a1 d1kcrl1 d2pxyb\_  
d2uzih\_ d5c3ld\_ d3durb\_ d1c5c11 d2ak4e1 d1d17h\_ d1xiwd\_ d1mlba1  
d1rmfl1 d1i7zb1 d1dlfl\_ d2xa3a\_ d5bq7b1 d1dqqb1 d3h4211 d1legjh1

d1kcv11 d1fe811 d2j6e11 d1f3rb2 d1lk311 d1sm3h1 d1q0xh1 d1ghfh1  
d7fab11 d1ligch1 d1lo0h1 d4idla\_ d5c2b1\_ d1jrh11 d1illa1 d3zhda1  
d4kfcz\_ d1b0wa\_ d1e6oh1 d1mex11 d4krpb\_ d1fnsh1 d1ncwh1 d4hgma\_  
d4eigb1 d4rzca\_ d2mpa11 d4y5xa\_ d5en2b1 d3lrga1 d4ej1c1 d1rhha1  
d1j05b\_ d1forh1 d1q9wb1 d2wzpd\_ d2aq2a1 d1h0da1 d3revb1 d2ij0c1  
d1tzha1 d4m7j11 d1k6q11 d3b9kc1 d1igml\_ d3qeua1 d1dsfl\_ d1celh1  
d1kcu11 d1zvha1 d1zvoa1 d1tqbb1 d1ay111 d2qscl1 d2cgrh1 d1nl0h1  
d1ken11 d3eo0a1 d4n9ob1 d1n0x11 d3k1kc\_ d2cqva1 d1fhga\_ d2k1ma\_  
d2dl2a1 d1biha3 d1biha1 d1biha4 d3qp3a1 d1glca\_ d1gxea\_ d1cvsc2  
d1cvsc1 d1xmwa2 d1m4ka2 d2otpa2 d1biha2 d1rhfa2 d2fcba2 d2fcba1  
d1wwbx\_ d1gsma2 d1epfa1 d1epfa2 d2dava1 d1waaa\_ d1f97a2 d1x44a1  
d1vcaa2 d1fnla2 d1fnla1 d3b5ha2 d3h8na2 d3h8na1 d1bjba1 d1bjba2  
d1pd6a\_ d1f2qa2 d1f2qa1 d3cx2a\_ d1nbqa2 d3b5ha1 d1n26a1 d1xiwb\_  
d1xaua\_ d1fltx\_ d2ifga1 d1olla1 d1olla2 d1cs6a4 d1cs6a3 d1cs6a2  
d1cs6a1 d2gw5a2 d1sy6a1 d1xiwa\_ d1lucta2 d1lucta1 d1ry7b2 d1gl4b\_  
d1qz1a3 d1olza1 d2c9aa1 d1wwca\_ d2aq2b1 d1ck1a1 d1lenfa1 d1i4pa1  
d1v1oa1 d1et9a1 d1esfa1 d2g9hd1 d4ohja1 d1klud1 d1bxta1 d1ty0a1  
d1fnua1 d1c4qa\_ d1prtcl d2wv6d\_ d1prtfl\_ d1ltrd\_ d4l63b1 d1r4pb\_  
d1tl0f\_ d2bosa\_ d1prtbl d3chbd\_

**Family-39 (b.6.1.3)**

**Positive dataset contains 11 protein sequences.**

d1sdda1 d1sdda2 d1mzya1 d2bw4a1 d1mzya2 d4e9sa1 d1sddb1 d1sddb2  
d1v10a2 d1v10a3 d1v10a1

**Negative dataset contains 4039 protein sequences.**

d1m32a\_ d1libja\_ d1c7na\_ d1iuga\_ d4q75a\_ d2bkwa1 d1t3ia\_ d1n8pa\_  
d1qz9a\_ d1jff9a\_ d1leg5a\_ d1p3wa\_ d3kgwa\_ d1cl1a\_ d2ctza1 d1vjoa\_  
d2rfva\_ d1gc0a\_ d1cs1a\_ d1d2fa\_ d2ch1a1 d1pffa\_ d1elua\_ d1ax4a\_  
d2v1pa1 d2ez1a\_ d1u08a\_ d1b5pa\_ d2ay1a\_ d1bw0a\_ d3pd6a\_ d7aata\_  
d2csta\_ d1j32a\_ d1fg7a\_ d4wlha\_ d1o4sa\_ d1v2da\_ d1gdea\_ d1m6sa\_  
d1v72a1 d1svva\_ d1ajsa\_ d1wsta1 d2f8ja2 d1lk9a\_ d1vp4a1 d1xi9a1  
d2gb3a1 d1yaaa\_ d3i2ka1 d1mpxa2 d2cfba1 d1dfoa\_ d1o69a\_ d1bj4a\_  
d3k28a\_ d2bwpa\_ d3lg0a\_ d2fnua\_ d3ou5a\_ d1z7da1 d1b9ha\_ d1iaya\_  
d4msoa\_ d1s0aa\_ d1sffa\_ d3tqxa\_ d1mdoa\_ d3qboa\_ d3pgya\_ d1bjna\_  
d2dkja\_ d1ejia\_ d1vefa1 d4wxga\_ d3bs8a\_ d3gbxa1 d1w23a\_ d1h6ua2  
d2tbvc\_ d1c8nc\_ d1x36a\_ d1smvc\_ d1ng0c\_ d4sbvc\_ d1lopa\_ d1f2nc\_  
d1rmka\_ d1ixta\_ d1eyoa\_ d1fu3a\_ d1glpa\_ d1f3ka\_ d1fyga\_ g1f8v.1  
d1novc\_ d2bbvc\_ g1gk9.1 g1cp9.1 g1e3a.1 d1a3qa1 d1iknc\_ d3brda1  
d1p7h11 d1oy3c\_ d1imhc1 d1gjia1 d1zk9a1 d2cxka1 d2bema\_ d1pama1  
d1qhoa1 d2fhfa2 d2fhfa1 d1k3ia1 d1j0ha1 d1cxl1a1 d2bhua1 d1ledqa1  
d1f1sa2 d1ut9a2 d1gvia1 d1txka1 d1adqa1 d1fnga1 d1uvqb1 d1zs8a1  
d2vola1 d2vola2 d1mfb12 d2jelh2 d1uwel2 d3qq4b1 d1kjbv\_ d1k5na1  
d1osph2 d4odh12 d1ow0a1 d1ow0a2 d1bfob2 d3l9ra2 d3jtth1 d2fath2  
d4elkb2 d1fn4b2 d2xfxb\_ d1pg7x2 d1cqka\_ d4k71b2 d1lk2a1 d1leapb2  
d4l1fhg2 d1i4fa1 d2nw2a2 d1kfah2 d1mhca1 d1h3ua1 d1wejh2 d1h0db2

d1a5fh2 d1kcvh2 d1mjuh2 d1qqda1 d1kcrh2 d1k8ia1 d3huja2 d2nnab1  
d1nfd2 d3mffb2 d1s9va1 d11k3h2 d1q0xl2 d1fv1b1 d1neza1 d4rfeb2  
d1r3ha1 d1a6tb2 d1kjva1 d1pz5b2 d1onqa1 d2bc4a2 d1de4a1 d1k8da1  
d1tcra2 d1dn0b2 d2xwtb2 d1bfoa2 d1mexh2 d1iakb1 d1ypzf2 d4f7ea2  
d1q72l2 d2fbjh2 d1fe8h2 d1clzh2 d1fngb1 d1uvqa1 d1vgka1 d1c16a1  
d4j12a2 d4x99b2 d1igtb3 d1je6a1 d1q72h2 d1nldh2 d1teth2 d2hmic2  
d1i1ca2 d1i1ca1 d1k8ib1 d1q0yh2 d1kfa12 d3frua1 d1pg7w2 d1u58a1  
d1igyb4 d1igyb3 d1hyrc1 d1klub1 d1deeb2 d1c12b2 d2bc4b2 d2ig2h2  
d1kcvl2 d3wn5b1 d11k2b\_ d11k3l2 d1mjul2 d1sm3h2 d1q0xh2 d1zvsa1  
d1ydpal d1u8ib2 d1ypze2 d1kcu2 d1zx5a1 d1qwra\_ d2phla2 d2phla1  
d1fxza2 d1fxza1 d1lrha\_ d1uija1 g1dgw.1 d2v09a\_ d1uika2 d1uika1  
d1dgwa\_ d1ogpa1 d1ktja\_ d1ds6b\_ d1fstb\_ d2b5ea2 d2b5ea3 d2b5ea1  
d2b5ea4 d2kp1a1 d2kp2a1 d1hyua3 d1hyua4 d1j08a1 d1j08a2 d1eixa\_  
d3exra\_ d2ffca1 d2fdsa1 d3n3ma1 d2czda\_ d1q6oa\_ d2yyua\_ d1vqta1  
d1dbta\_ d3ldva1 d1mqta\_ d1d4m3\_ d1fmd3\_ d2mev1\_ g1aym.1 d1ev13\_  
d4q4w1\_ d1r1a3\_ d2x5ia\_ d1rhi1\_ g1r1a.1 g1d4m.1 g1rhi.1 d1b35b\_  
d1loopa\_ d1tme1\_ d4iv1a\_ g1pvc.1 g1fpn.1 d1fpn1\_ d4gb31\_ d1d4m1\_  
d1fmd1\_ d1ev11\_ d2wzr3\_ g1cov.1 d1qqp3\_ d2x5ic\_ d1rhi3\_ gloop.1  
d1hxs1\_ g1hxs.1 d1fpn3\_ d1bev1\_ g2mev.1 d1eah3\_ d1aym1\_ d1pvc3\_  
d1qqp1\_ d1zba3\_ d1h8ta\_ d3vbhc\_ g1b35.1 g1bev.1 d1hxs3\_ g1ev1.1  
d1bev3\_ g1tmf.1 d1tmf1\_ d1b35a\_ d2mev3\_ g1eah.1 g1h8t.1 d1eah1\_  
d4q4w3\_ d1r1a1\_ d1aym3\_ d1pvc1\_ d1zba1\_ d1h8tc\_ d1loopc\_ d1tme3\_  
g1qqp.1 d4iv1c\_ g1tme.1 d2ovga\_ d1sq8a\_ d1rzsa\_ d3kz3a\_ d3orca\_  
d3gpdg2 d2q49a2 d1hdgo2 d2g17a2 d2cvoa2 d2czca1 d3pwka2 d1obfo2  
d1i32a2 d1zyao2 d2pkqo2 d1b7go2 d2hjsa2 d1cf2o2 d1vkna2 d1nvmb2  
d2m9wa1 d3dfxa\_ d2msya\_ d2djoa1 d2r5za\_ d1au7a1 d1f43a\_ d2lmda1  
d1akhb\_ d1s7ea1 d3nara\_ d1zq3p1 d2craa1 d1mija\_ d4uuta\_ d3a01a\_  
d1x58a1 d3rkqa1 d3cmya1 d2cqxa1 d2da6a1 d1e3oc1 d1fjla\_ d1mh3a1  
d1ig7a\_ d1x41a1 d1wh7a1 d1gt0c1 d2mw8a\_ d1lfup\_ d1x2ma1 d1b72a\_  
d1wi3a1 d1wjha1 d1x2na1 d1mnm\_ d2cuea1 d3k2aa\_ d2hosa\_ d2jwta2  
d1pufa\_ d1octc1 d2hi3a\_ d1b8ia\_ d4j19a\_ d3lnqa\_ d1wh5a1 d1b8ib\_  
d1fexa\_ d2cqra1 d1guua\_ d1ug2a1 d2cqqa1 d2ajea1 d4a69c\_ d2crga1  
d2iw5b1 d1xc5a1 d1ofcx1 d2cu7a1 d1wgxa1 d2cjja1 d2ckxa1 d1gvda\_  
d1tc3c\_ d1gdta1 d1u78a2 d1hlva2 d1iufa2 d1iufa1 d2iu5a1 d1zk8a1  
d2g7sa1 d2fd5a1 d2np5a1 d1z0xa1 d2id6a1 d2d6ya1 d2i10a1 d1vi0a1  
d2oi8a1 d3c07a1 d2ns7a1 d2fq4a1 d2yvea1 d1t33a1 d2o7ta1 d1rkta1  
d2np3b1 d2g7ga1 d2gena1 d2fbqa1 d2g7la1 d2gfna1 d2g3ba1 d2jj7a1  
d2hyja1 d1sgma1 d1ui5a1 d2hkua1 d2id3a1 d4jyka1 d1ex4a2 d1c6va\_  
d3lv8a\_ d1s3ga1 d1zaka1 d1s4qa\_ d3tvta2 d1uf9a\_ d1khta\_ d1ckea\_  
d1osna\_ d1p5zb\_ d4tmka\_ d3cm0a\_ d1tmka\_ d1jaga\_ d3h86a\_ d1t0hb\_  
d1nn5a\_ d2h92a\_ d3kb2a1 d2c95a1 d1yj5a2 d1ly1a\_ d2ak3a1 d1vyva2  
d1deka\_ d2grja1 d1p3ja1 d1y63a\_ d1e4ya1 d1s96a\_ d3iija1 d1lvga\_  
d1nksa\_ d1vyua2 d4e22a\_ d1qf9a\_ d1jjva\_ d1q3ta\_ d1ki9a\_ d1lw7a2  
d1teva\_ d1kjwa2 d1gsia\_ d1x6va3 d1g3ma\_ d1j99a\_ d1t8ta1 d1nsta\_

d1zrha\_ d1ls6a\_ d2a3ra\_ d1aqua\_ d2zptx\_ d3ckla\_ d1texa\_ d1q44a\_  
d2gwha\_ d1odfa\_ d1uj2a\_ d4gi7a\_ d2jeoa1 d1rz3a\_ d1z0ja1 d3umra2  
d3gj0a1 d2gaoa1 d1yzga1 d1x3sa1 d1g7sa4 d1puja\_ d1udxa2 d1kk1a3  
d2o52a\_ d1jwyb\_ d1zcaa2 d1zcba2 d2fv8a1 d2cjwa\_ d3dz8a1 d1xzpa2  
d1vg8a\_ d4qxaa\_ d2ew1a1 d1x1ra1 d2bcgy\_ d3doea1 d3cona\_ d3rega\_  
d3wyga\_ d1upta\_ d2b6ha1 d1zd9a1 d1lnza2 d1r5ba3 d1n0ua2 d1r2qa\_  
d2f91a1 d2rhda\_ d3q3jb\_ d3q85a\_ d1efma1 d1r8qa\_ d2gf9a1 d2akab1  
d1ek0a\_ d1z08a1 d2gcoa1 d2dy1a2 d4g01b\_ d2cxa1 d1svia\_ d3q72a\_  
d1ni3a1 d4ac9a4 d2erxa1 d2bmea\_ d1wxqa1 d2gf0a1 d4ldja1 d1zunb3  
d1d5ca\_ d4lv5b\_ d1efca3 d1kmqa\_ d2g6ba1 d3lrpa\_ d1tada2 d2y8ea\_  
d4rd4a1 d1z06a1 d2heia\_ d3a58b\_ d1u01a2 d1d2ea3 d1zj6a1 d2ocba\_  
d3rwoa\_ d1mr3f\_ d2e9sa1 d4u5xa1 d2iwra\_ d2fn4a1 d3bwdd\_ d2nzja1  
d2atva1 d2ksqa\_ d3l43a\_ d1mkya2 d1mkya1 d1wmsa\_ d1jnaya3 d2rmka\_  
d1f6ba\_ d1f60a3 d1gota2 d1jala1 d2fh5b1 d1g16a\_ d2wblc\_ d1m7ba\_  
d1wf3a1 d1f5na2 d1t9ha2 d1z6xa1 d1z0aa1 d2fg5a1 d2a5ja1 d2bcjq2  
d1s0ua3 d1ky3a\_ d4y0va\_ d4lhwa\_ d2qmea1 d2atxa1 dlegaa1 d1ryha\_  
d1moza\_ d1nrjb\_ d2erya1 d3bfka\_ d1puia\_ d3j3az1 d3t5ga\_ d1shza2  
d3defa\_ d2f7sa1 d3raba\_ d3tsoa\_ d3aq4a\_ d2a17a1 d3sfva1 d3bc1a\_  
d2ncda\_ d1sdma\_ d3h4sa1 d2heha\_ d2grya\_ g3kin.1 d1kk8a2 d1br2a2  
d1goja\_ d1f9va\_ d2mysa2 d1lkxa\_ d3t0qa\_ d4db1a1 d3gbja\_ d1ry6a\_  
d1v8ka\_ d1kb0a1 d1k8ka2 d1k8ka1 d3uleb1 d3i33a2 d3i33a1 d1bupa1  
d1dkgd2 d1dkgd1 d4ci6a2 d1jcf1a1 d4a2ba2 d2fxua1 d1yaga2 d1yaga1  
d4cbua2 d1bupa2 d3vrda1 d3vrda2 d1fcdc2 d1fcdc1 d1h1oa2 d1h1oa1  
d1m70a2 d1iqca2 d1iqca1 d1eb7a2 d1nmla2 d1nmla1 d1nira1 d1qksa1  
d3h1jd1 d2d0oa3 d2d0oa2 d1nbwa3 d1hroa\_ d4gedb\_ d3zooa\_ d1mz4a\_  
d1gu2a\_ d1f1fa\_ d1dvva\_ d1c6ra\_ d1c75a\_ d1e29a\_ d1gdva\_ d1cnoa\_  
d1h32b\_ d1co6a\_ d2bh4x\_ d2aiua\_ d5cytr\_ d1jdl1a\_ d1i8oa\_ d2zboa\_  
d3dmia\_ d1ls9a\_ d1wvec\_ d2yk3a\_ d3ph2b\_ d1dw0a\_ d5aura\_ d1ql3a\_  
d1qn2a\_ d1f1ca\_ d4zzva\_ d2xspa\_ d1eg1a\_ d4v20a\_ d1ojja\_ d4ipma1  
d4csia\_ d3pfza\_ d3ovwa\_ d2yoka\_ d2nqya\_ d1h4ga\_ d1hixa\_ d1oa2a\_  
d1olra\_ d3b7ma\_ d4h7ma1 d3wp3a\_ d2vgda\_ d1ligoa\_ d3zsea\_ d2nlra\_  
d3wx5a\_ d1oa3a\_ d1pvxa\_ d1m4wa\_ d1f5ja\_ d1oa4a\_ d1ks5a\_ d4ix1a1  
d1h32a1 d1evsa\_ d1pvhb\_ d1z7ca\_ d1huwa\_ d1bgea\_ d1rhga\_ d1f6fa\_  
d1f45b\_ d1i1rb\_ d1axia\_ d1etea\_ d3tgxb\_ d1scfa\_ d2z3qa1 d3qb1a\_  
d1hula\_ d1m48a\_ d4nkqb\_ d1eera\_ d5e4ea\_ d2o27a\_ d3b5ka\_ d2psma1  
d4zf7a\_ d3uf5a\_ d4x51a\_ d1d9ca\_ d4ypgc1 d3oq3a\_ d1n1fa\_ d1au1a\_  
d1wu3i\_ d3bes1\_ d3ux9a\_ d3rbaa\_ d2qtra\_ d1nupa\_ d3l92a\_ d1f9aa\_  
d1qjca\_ d2h29a\_ d1vlha\_ d1lw7a1 d1mrza2 d4ruka\_ d2el7a\_ d1iq0a2  
d1r6ta2 d1livsa4 d2cyba\_ d1rqga2 d1j09a2 d2yxna\_ d1f7ua2 d1h3fa1  
d1ffya3 d2g36a1 d1nzja\_ d1jila\_ d1n3la\_ d1i6la\_ d1pfva2 d1h3na3  
d3n9ia\_ d3sz3a1 d2bk7a\_ d3fjua\_ d1z5ra1 d1kwma1 d1uwya2 d1jqga1  
d2c1ca1 d1dtda\_ d1h8la2 d3sw2a\_ d1moxc\_ d1dx5i3 d1edmb\_ d1aut12  
d1aut11 d1dval1 d1szba2 d1kigl\_ d2y5f1\_ d1ijqa2 d1gk5a\_ d1g1sa2  
d1nt0a3 d1xdtr\_ d1lmja2 d1lmja1 d1nzia2 d2wphe\_ d1klil\_ d1pfx12

d1pfx11 d1p9ja\_ d1g1ta2 d1f7ea\_ d4yzub\_ d2mgpa1 d1b9wa1 d1b9wa2  
d2mgpa2 d1ob1c1 d1n1ia2 d1n1ia1 d2npra2 d2npra1 d1m1xb5 d2y5ia\_  
d1qlsa\_ d1psra\_ d3n22a\_ d2egda\_ d4ggfc\_ d2wcea\_ d2luca\_ d4aqia\_  
d3nsia\_ d2lp3a\_ d1j55a\_ d1a4pa\_ d1k8ua\_ d1nsha\_ d1pvaa\_ d3fs7a\_  
d2pvba\_ d1ttxa\_ d1rwya\_ d2kyfa\_ d1rk9a\_ d1a75a\_ d1lexra\_ d1tiza1  
d1nyaa\_ d1g8ia\_ d1ggwa\_ d1wdcc\_ d3fwba\_ d1ggza\_ d2o5ga\_ d1ctaa\_  
d1m45a\_ d3i5gc\_ d1s18a\_ d1fpwa\_ d2scpa\_ d2roaa\_ d4aqra\_ d3pn7b\_  
d1br1b\_ d2mysb\_ d1s6ca\_ d1bjfa\_ d2obha\_ d1jfka\_ d1jf0a\_ d1qv0a\_  
d1lkja\_ d2mlfc\_ d2m97a\_ d2d8na\_ d4by5a\_ d1jbaa\_ d4nqga\_ d1wdcb\_  
d2mysc\_ d1j7qa\_ d1s6ia\_ d1uhka2 d1r2ua\_ d1dtla\_ d3kf9a\_ d3pn7c\_  
d5d67d\_ d1tuza\_ d1h8ba\_ d1eg3a1 d1eg3a2 d2zkmx1 d1snla\_ d1gjya\_  
d1y1xa\_ d1hqva\_ d1dvia\_ d1df0a1 d1qxp2 d4usla\_ d1k94a\_ d1wkya2  
d1uuqa\_ d3wh9a\_ d4m1ra\_ d1xyza\_ d4xuya\_ d2je8a5 d4bf7a1 d3cuia\_  
d1ur4a\_ d1qw9a2 d1odza\_ d2vzsa5 d1bqca\_ d2x2ya1 d1hjqa\_ d1qnra\_  
d4y7ea1 d1vjza\_ d4k68a\_ d2v3ga\_ d4hpga\_ d1nofa2 d1nq6a\_ d1h4pa\_  
d1aq0a\_ d3ziza\_ d4bs0a\_ d1ecea\_ d1h1na\_ d1ta3b\_ d1w91a2 d1l1wa\_  
d1uhva2 d1us3a2 d1egza\_ d7a3ha\_ d1tvna1 d3nyda1 d1ghsa\_ d2cyga1  
d4xv0a\_ d2c8na2 d1w32a\_ d3emca\_ d1v6ya1 d1foba\_ d2uwfa1 d2fgla\_  
d3niya1 d2c0ha1 d1rh9a1 d1yq2a5 d1szna2 d1fa2a\_ d1pama4 d5do8a1  
d1ea9c3 d1hx0a2 d2fhfa5 d1qhoa4 d1avaa2 d1m53a2 d4m8ua1 d2gjpa2  
d1lwha2 d4howa1 d1ktba2 d1j0ha3 d3vm5a1 d2x1ia\_ d1wzaa2 d1uasa2  
d2diea1 d1mxga2 d1ht6a2 d1eswa\_ d1iv8a2 d5cpsa\_ d1ud2a2 d1zjaa1  
d3gbea1 d1kwga2 d1wdpa\_ d1gcy2 d1g5aa2 d1hvxa2 d3dhpa2 d2bhua3  
d4do4a1 d3qgva1 d1e43a2 d1g94a2 d2d3na2 d1gjwa2 d1gvia3 d1x1na1  
d1r7aa2 d1tz7a1 d4toqa\_ d1wb0a1 d1w9pa1 d1eoka\_ d1itxa1 d1kfwal  
d1goia2 d1edqa2 d2gsja\_ d1hjxa1 d1jnda1 d1vf8a1 d3wdpp1 d3wq5a\_  
d1gnxa\_ d4gxpa\_ d4hz8a\_ d1e4mm\_ d3aiua\_ d1wcga1 d3ahxa\_ d1v02a\_  
d2dgaa\_ d1pbga\_ d1vffa1 d1qoxa\_ d4ha4a\_ d1e5wa2 d1j19a2 d1isna2  
d2a16b2 d3syxa1 d1mkea1 d2p8va\_ d1xoda1 d1i7aa\_ d1evha\_ d1qc6a\_  
d1eh3a\_ d3skpa\_ d1dtza1 d1dtza2 d1ieja\_ d1jnfa2 d1ce2a1 d1jnfa1  
d1b1xa2 d1b1xa1 d1jw1a1 d1jw1a2 d1ryoa\_ d1h76a1 d1h76a2 d2v76a\_  
d1wj1a1 d1aqca\_ d1qqga2 d1qqga1 d1ntva\_ d1n3ha\_ d4dbba\_ d3f0wa1  
d1p3ra\_ d1wgua1 d2cy4a1 d3hqca\_ d1wvha1 d1xr0b1 d3nvva1 d1krha3  
d2h88b1 d1n62a2 d1t3qa2 d1kf6b2 d1zoyb1 d1jq4a\_ d1ffva2 d1dgja2  
d1rm6c2 d9ldta1 d2ewda3 d1up7a1 d2dfda1 d1s6ya1 d1vjta1 d7mdha1  
d1hyea1 d1t2da1 d1ojsa3 d1b8pa1 d1ldna1 d1hyha1 d1civa1 d2a92a1  
d1ez4a1 d1i0za1 d1y6ja1 d1gv0a1 d1ur5a1 d1llda1 d1lobba1 d1v8ba1  
d1gdha1 d2dlda1 d1mx3a1 d1ygya1 d1qp8a1 d1li4a1 d1j4aa1 d2naca1  
d1txga2 d3f47a1 d1mv8a2 d2pv7a2 d1xc2a3 d2ahra2 d4xiya1 d2f1ka2  
d1pgja2 d1i36a2 d1np3a2 d1lj8a4 d1teaa3 d1qmg2 d2i76a2 d2g5ca2  
d1wdka3 d1dlja2 d3cuma3 d1kola2 d1f8fa2 d1qora2 d1jqba2 d1vj0a2  
d1cdoa2 d1gu7a2 d1d1ta2 d1xa0a2 d2dm6a2 d1jvba2 d1rjwa2 d1llua2  
d1tt7a2 d1piwa2 d1o89a2 d1iz0a2 d1e3ja2 d1yb5a2 d1uufa2 d1vj1a2  
d1e3ia2 d3gpdg1 d1vc2a1 d2nvwa1 d1u8fo1 d1ydwa1 d1hdgo1 d2g17a1



d1cf2o1 d2czca2 d1r0ka2 d1lobfo1 d2cvoa1 d1ebfa1 d1h6da1 d1i32a1  
d1zh8a1 d2q49a1 d1qkia1 d1j5pa4 d3pzra1 d1xeaa1 d1vkoa1 d1vm6a3  
d3qvsa1 d2pkqo1 d1b7go1 d1gr0a1 d1p1ja1 d1lc0a1 d1j0xo1 d3pwka1  
d2hjsa1 d1zyao1 d1vkna1 d1tlt1a1 d1nvmbl d3sjua\_ d3ojfa1 d1xu9a1  
d2jjya1 d1n7ha\_ d1y1pa1 d1h5qa\_ d1jtva\_ d4fs3a\_ d2bkaa1 d1gy8a\_  
d2c5aa1 d1ulsa\_ d1ooea\_ d2b69a1 d1y5ma1 d1spxa\_ d1ae1a\_ d1bxka\_  
d1ydea1 d1gega\_ d1hdoa\_ d1o5ia\_ d1e6ua\_ d1snya1 d2rhca\_ d3zv4a\_  
d5ceja\_ d2d1ya1 d1fjha\_ d3w8ea\_ d2fmua1 d1x1ta\_ d1rpna\_ d3ay7a1  
d1k2wa\_ d1eq2a\_ d2hrba1 d3ruaa\_ d2ew8a1 d4hwka\_ d1xgka\_ d2bd0a1  
d1yo6a1 d2a35a1 d2ntva\_ d1vl8a\_ d1hdca\_ d4bkua\_ d2ag5a1 d2q45a\_  
d1nffa\_ d4iy1a\_ d1zbqa1 d1kewa\_ d1ek6a\_ d1ja9a\_ d2q46a2 d1iy8a\_  
d1cyda\_ d2ptga\_ d1hxha\_ d1uzma1 d3lyla\_ d4m89a\_ d3wyea\_ d2b11a1  
d1w6ua\_ d1sb8a\_ d2q2va\_ d4nr0a\_ d1e6wa\_ d2gasa\_ d3oiga1 d2bgka1  
d1mxha\_ d1vl0a1 d1rkxa\_ d1r6da\_ d1wmaa1 d1e7wa\_ d2c07a1 d1xkqa\_  
d3tzha\_ d1g0oa\_ d3l26a\_ d1qyca\_ d1ledoa\_ d1gz6a\_ d1loc2a\_ d1t2aa\_  
d1zema1 d2xoxa\_ d1z45a2 d1geea\_ d1p33a\_ d3lt0a\_ d4e6pa\_ d2wyua\_  
d1db3a\_ d4q9na\_ d1xhla\_ d4o1ma\_ d1fmca\_ d2uvda\_ d2gdza1 d1uaya\_  
d2z1ma\_ d2o23a2 d2fr1a2 d2fr1a1 d1qsga\_ d1qyda\_ d4zjua\_ d2a4ka1  
d1ybla\_ d1wvga1 d1yxma1 d3f4ba\_ d1mg5a\_ d1xg5a1 d1r55a1 d3gboa\_  
d1atla\_ d1kufa\_ d4q11a\_ d1quaa\_ d1yp1a\_ d1wnia\_ d4ekfa\_ d2ckga\_  
d1th0a\_ d2bkra\_ d1rypd\_ d1irua\_ d1rypc\_ d3unfk\_ d1rypa\_ d1j2pa\_  
d1irui\_ d1j2qh\_ d3unfh\_ d1m4ya\_ d1rypb\_ d1irug\_ d1iru2\_ d1q5rh\_  
d1rypg\_ d1g3ka\_ d1iruf\_ d1q5qa\_ d1e94a\_ d1irub\_ d1ryph\_ d3ty6a\_  
d1iruj\_ d1iruk\_ d1rype\_ d1irud\_ d1irue\_ d3mi01\_ d1rypf\_ d1iruh\_  
d2z3ba\_ d1iruc\_ d3mka2\_ d1iru1\_ d1g0da4 d2f4ma1 d1x3za\_ d3ulra1  
d1g9ka2 d1k7ia2 d1t3ca\_ d1epwa3 d2a97a\_ d3f1ea\_ g1e1h.1 d3ioqa\_  
d1fh0a\_ d1o0ea\_ d1m6da\_ d2cb5a\_ d1cs8a\_ g8pch.1 d1s4va\_ d2pnsa\_  
d1vsna1 d1mira\_ d1iwda\_ d2oula\_ d7pcka\_ d3bwka\_ d3bcna\_ d2p86a\_  
d1pvja\_ d1pcia\_ d1gece\_ d1deua\_ d4bs6a\_ d1xkga1 d1cqda\_ d1jqpa2  
d2c0ya\_ d2bdza\_ d3p5ua\_ d1zoya1 d1qo8a2 d1d4ca2 d1jnra2 d1kf6a2  
d2jk6a2 d2jk6a1 d1fecal d1fecal d1lpfa1 d1lpfa2 d1xhca1 d1xhca2  
d1dxa1 d1dxa1 d1gera2 d1m6ia2 d1onfa1 d3lada2 d3lada1 d1w4xa1  
d1w4xa2 d1gesa2 d1mo9a1 d1xdia1 d1fl2a2 d1fl2a1 d1fcda1 d1fcda2  
d1h6va2 d1h6va1 d1mo9a2 d1gv4a2 d1gv4a1 d2gv8a2 d2gv8a1 d1aoga1  
d1aoga2 d1hyua1 d1ebda1 d1ebda2 d3dk9a1 d1q1ra2 d1q1ra1 d1gesa1  
d1zbfal d2z1ha\_ d2etja1 d3qioa1 d1j11a\_ d2e41a\_ d1j12a\_ d2lsna1  
d1uaxa\_ d2yv0x\_ d1mu2a1 d1ekea\_ d1i39a\_ d1pn0a1 d1reoal d1ju2a1  
d2f5va1 d3c96a1 d2gmha1 d1pj5a2 d1o5wa1 d1n4wa1 d1k0ia1 d2dw4a2  
d2ivda1 d1seza1 d2voua1 d1kdga1 d1s5ja1 d2hbja2 d2igia\_ d1wlja\_  
d1qhta1 d4dlea1 d1tgoa1 d2f96a1 d3tr8a1 d3mxma\_ d1q8ia1 d1y97a1  
d1w0ha\_ d1kfsa1 d2py5a1 d1d5aa1 d1yt3a3 d2guia\_ d3mwpal d4kb1a\_  
d2y8ga\_ d1xkea1 d2y8fa\_ d1iv0a\_ d1nu0a\_ d1iuka\_ d2csua1 d3q9ub\_  
d2yv1a1 d3q9na\_ d2d59a\_ d1oi7a1 d2yv2a1 d1euca1 d1y81a1 d1wgqa1  
d1v89a1 d2coda1 d1zc3b\_ d1wg7a1 d1u5ea1 d1v61a1 d2coca1 d2ys1a1

d1v5pa1 d1ntya2 d1wjma1 d1wi1a1 d1u29a\_ d1xx0a1 d1lunqa\_ d2zkmx3  
d1fhoa\_ d1v88a1 d2adza1 d1x1fa1 d1p6sa\_ d2coaa1 d1btka\_ d1v5ma1  
d1faoa\_ d2x18a\_ d1dyna\_ d1x1ga1 d4kaxb\_ d2j59m1 d1ki1b2 d1xcga2  
d1txda2 d1u5da1 d1dbha2 d1w1ha\_ d1upqa\_ d1v5ua1 d2fjla1 d1eaza\_  
d2dfka2 d2cofa1 d1kz7a2 d1jmx2 d1jmx1 d1pbya2 d1r7ha\_ d1faaa\_  
d1wika1 d1xfla\_ d1ttza1 d2f51a1 d1ti3a\_ d1nhoa\_ d1sena\_ d2i4aa\_  
d1ep7a\_ d1zmaa1 d3lefa1 d3diea1 d2yana1 d1z6na1 d1oaza\_ d3zywa1  
d4aj8a\_ d1nm3a1 d4fiwa\_ d1wmja\_ d4hs1a1 d1iloa\_ d1xwaa1 d1wjka1  
d2vmla\_ d1fb6a\_ d1gh2a\_ d1h75a\_ d1nw2a\_ d1kx5b\_ d3a6na\_ d4m6ba2  
d2nqbd\_ d3wkjd\_ d2yfwe\_ d4h9na\_ d5bnxa\_ d1kx5c\_ d3r45a\_ d1eqzb\_  
d4jjnb\_ d1f66c\_ d1eqza\_ d4wnnb\_ d1kx5a\_ d1u35c1 d1lid3a\_ d2nqbc\_  
d1kx5d\_ d1ku5a\_ d1flea\_ d1tafa\_ d1bh9b\_ d1tafb\_ d1q9ca\_ d1h3ob\_  
d2byka1 d1n1ja\_ d4g92b\_ d1bh9a\_ d1jfia\_ d1h3oa\_ d2bykb1 d1n1jb\_  
d1pd212 d1nhya2 d2a2ra2 d1k0dd2 d1f2ea2 d1gsua2 d1f3ba2 d2fhea2  
d2pvqa1 d1tw9a2 d1oyja2 d1e6ba2 d1k0ma2 d3ik7a1 d4is0a1 d1r5aa2  
d1jlva2 d1m0ua2 d3gtub2 d1z9ha2 d1okta2 d1axda2 d2gsra2 d1tu7a2  
d1k3ya2 d1zgma1 d1gnwa2 d1gwca2 d2gsta2 d1glqa2 d1oe8a2 d1pn9a2  
d1v2aa2 d1fw1a2 d1duga2 d1ovna2 d1npya1 d3t4ea2 d1a4ia1 d1o0sa1  
d2hk9a2 d2egga2 d1b26a1 d1bvua1 d1gq2a1 d1c1da1 d1leha1 d1gtma1  
d1euzal d1nvtal d3dona2 d1edza1 d1gpja2 d1p77a1 d1nytal d1b0aa1  
d1v16a1 d1v91a1 d1qsaa2 d1qqya\_ d1gd6a\_ d1livma\_ d2gv0a\_ d1iiza\_  
d2z2fa\_ d1j8xa\_ d1ghla\_ d1b9oa\_ d1741a\_ d1691a\_ d2o4wa\_ d1p37a\_  
d1k28a3 d1xjta1 d1jtma\_ d2f2qa\_ d4e97a1 d1mpya2 d1kw3b2 d4ghga1  
d1tfza1 d3isqa1 d3isqa2 d1sqia1 d1sqia2 d1lkda2 d1lkda1 d1mpya1  
d1cjxa2 d1cjxa1 d1sp9b2 d1t47a1 d1t47a2 d1flua2 d1sp8a1 d1sp8a2  
d1flua1 d1etob\_ d1umqa\_ d1iyka2 d1rxta1 d1iica2 d1iica1 d1qsta\_  
d2beia1 d4m3sa\_ d1u6ma1 d1ygha\_ d1yk3a1 d3dr6a\_ d1xmta\_ d1z4ea1  
d2ge3a1 d1bo4a\_ d2fiaa1 d2jdca1 d1y9wa1 d3to7a\_ d1wwza1 d2fl4a1  
d2ozua1 d2b5ga\_ d2cy2a1 d2p0wa\_ d1cm0a\_ d4pswa\_ d1yrea1 d1yr0a1  
d1m4ia\_ d2gana1 d1yvka1 d1ghea\_ d2g3aa1 d1y7ra1 d2eulia1 d1q2ya\_  
d2fsra1 d1xeba\_ d2ae6a1 d1cjwa\_ d1qsm1 d2aj6a1 d1y9ka1 d1i12a\_  
d1vkca\_ d2atra1 d1n71a\_ d2d4pa1 d2fiwa1 d2fe7a1 d1tiqa1 d2ou2a\_  
d1yx0a1 d2fcka1 d1p0ha\_ d2j8ma\_ d2pq8a\_ d1z4ra1 d1s3za1 d1ufha\_  
d1dosa\_ d3qm3a1 d2fjka\_ d1xvqa1 d1pn0a2 d3hy2a\_ d2cvba1 d1o8xa\_  
d1lu4a\_ d1we0a1 d2bmx1 d2a4va1 d1psqa\_ d1xiya1 d1q98a\_ d1n8ja\_  
d1zofa1 d2ggta\_ d3tjja\_ d4je1a1 d1o73a\_ d3s9fa\_ d2zcta\_ d1qmva\_  
d1jfua\_ d2b1ka\_ d5dvba1 d2b5xa1 d2v2ga\_ d1st9a\_ d3tb2a\_ d4llra\_  
d4fh8a1 d1e2ya\_ d1knga\_ d2h30a\_ d1i5ga\_ d2z9sa\_ d2f8aa1 d1tp9a1  
d2b7ka\_ d1nm3a2 d3hvva\_ d2wfca1 d4kcea\_ d1xvwa1 d4ggca1 d3qpma\_  
d4k1fa\_ d1zsoa1 d1gp1a\_ d1prxa\_ d4od7a1 d1z6ma1 d4mcua1 d4dvca1  
d1r4wa\_ d3l9sa\_ d3rppa\_ d2qked\_ d4ksoa\_ d1t4za1 d1wwja\_ d1f74a\_  
d3l21a\_ d2e1da\_ d1to3a1 d1w3ia\_ d1sfla\_ d1n7ka\_ d1vcva1 d4imea\_  
d1wa3a\_ d2ocza1 d1f2ja\_ d3m16a\_ d2yxga\_ d3a5fa\_ d1fbaa\_ d1l6wa\_  
d1xfba1 d1wx0a1 d1vpxa1 d1ojxa\_ d1mxsa\_ d2a4aa1 d1xkya1 d3cq0a1

d3s1xa\_ d1f05a\_ d1fdja\_ d3cp1a1 d4d2ja\_ d1cg2a1 d1yloa2 d1y7ea2  
d1y0ya3 d1l1fwa1 d1vixa1 d1fnoa4 d1ysja1 d1vhea2 d1z2la1 d2fvga2  
d1vgya1 d1r3na1 d2grea2 d1xmba1 g1q7l.1 d1rtqa\_ d1ys1x\_ d4hs9a\_  
d1ex9a\_ d1ku0a\_ d3qmma\_ d1ra6a\_ d1muka\_ d3gsza\_ d1khva\_ d1te9a\_  
d2xwha\_ d3uqsa\_ d3hkwa\_ d3n6ma\_ d2cjqa\_ d2xyma\_ d1teba\_ d1te8a\_  
d1s48a\_ d1u09a1 d4wfxa\_ d3tyqa\_ d2pgga1 d1lgya\_ d4l3wa\_ d1llfa\_  
d1gz7a\_ d1lukca\_ d2hqya1 d2hqya2 d1lrza2 d1lrza3 d1ne9a2 d1lixra2  
d3ia2a\_ d1a88a\_ d4dgqa1 d1hkha\_ d1zoia\_ d3zxha\_ d1cgla\_ d1rm8a\_  
d1hy7a\_ d2jsda\_ d1cxva\_ d1hv5a\_ d1i76a\_ d3p0ya1 d1lgra1 d1lgra2  
d1n8yc2 d1m6ba2 d1m6ba1 d1sr9a2 d1rqba2 d1i26a\_ d1cixa\_ d1y29a\_  
d1v7fa\_ d2jtba\_ d1d1ha\_ d1g9pa\_ d1qk7a\_ d1mb6a\_ d2a2va\_ d1niya\_  
d1i25a\_ d1hvwa\_ d2mpqa\_ d1ie6a\_ d1kqha\_ d1la4a\_ d2mxoa1 d1dl0a\_  
d1koza\_ d1qk6a\_ d1emxa\_ d1lqra\_ d1c6wa\_ d1js9c\_ d1za7a\_ d1laja\_  
d4lu0a\_ d3unda1 d3e9aa1 d1vr6a2 d1n8fa\_ d2qkfa\_ d1d9ea\_ d1o60a\_  
d1e88a1 d1l6ja5 d1l6ja4 d1eaka4 d1eaka3 d1l6ja3 d1h8pa2 d1ny721  
d1a6ca3 d1a6ca2 d1a6ca1 d1pgl22 d1pgl21 d1pgl11 d1ny711 d1jgta2  
d1ofda3 d1ea0a3 d1ecfa2 d1ct9a2 d1ao0a2 d1te5a\_ d3ubub\_ d1legia\_  
d1qo3c\_ d1v7pa\_ d1tdqb\_ d3ubua\_ d1c3ab\_ d1h8ua\_ d3bx4b\_ d1t8ca1  
d1sb2a1 d1qdda\_ d2ziba1 d3cada\_ d1byfa\_ d1j34b\_ d1jwia\_ d1jzna\_  
d1c3aa\_ d1oz7b\_ d1wmza\_ d3bdwb\_ d1hq8a\_ d1fifa1 d1dv8a\_ d3hupa\_  
d1wk1a1 d1umra\_ d2afpa\_ d3bx4a\_ d1gz2a\_ d1sl6a\_ d1v7pb\_ d3g8ka\_  
d1ixxa\_ d1j34a\_ d1jwib\_ d1g1sa1 d1y17a1 d1ja3a\_ d1fvub\_ d3bdwa\_  
d1sb2b1 d1fvua\_ d1umrc\_ d1oz7a\_ d4m17a\_ d3cfwa1 d1ypqa1 d1g1ta1  
d3fd4a\_ d3l9jc\_ d4dn8a1 d1v41b\_ d1rd11\_ d2msba\_ d1lix2a\_ d4lt9a1  
d3tc7a1 d3hoja\_ d1i4na\_ d3vnda\_ d3n18a1 d1geqa\_ d3nava1 d1v5xa\_  
d4a2ra1 d3tc6a1 d1ujpa\_ d4ijba\_ d1xcfa\_ d1rd5a\_ d1qopa\_ d3b5va\_  
d2r80b\_ d1cqxa1 d1cg5a\_ d1gcvb\_ d3boma\_ d2h8fb\_ d2raoa\_ d3bj1a\_  
d4hrrb\_ d2r50a\_ d3d1kb\_ d2aa1b1 d3zhwa\_ d3hf4b\_ d3gdja\_ d1jebb\_  
d3bj1b\_ d1x9fb\_ d1wmub\_ d1gcva\_ d3bcqb\_ d3d4xb\_ d1gvha1 d2dc3a\_  
d3hf4a\_ d4yu3a\_ d3k8ba\_ d1qpwb\_ d2r80a\_ d3bcqa\_ d1v4wa\_ d3wtgb\_  
d1j17a\_ d4esaa\_ d1a9we\_ d3d1ab\_ d1fsla\_ d4h21a\_ d1v4wb\_ d1mwca\_  
d1vhba\_ d1jeba\_ d1spgb\_ d1h97a\_ d1q1fa\_ d1tu9a1 d3d1aa\_ d1hdsb\_  
d3hyub\_ d2zfb\_ d3fs4a\_ d1oj6a\_ d1shrb\_ d4h21b\_ d4yu3b\_ d1spga\_  
d3hrwa\_ d3qqra\_ d3at5a\_ d4wchd\_ d3hyua\_ d1cg5b\_ d1uc3a\_ d1hbra\_  
d2raob\_ d1outb\_ d4esab\_ d3gdjb\_ d3qqqa\_ d1x9fc\_ d3vrfa\_ d1litha\_  
d3mkba\_ d3d4xa\_ d3mjpa\_ d1j16a\_ d3fh9a\_ d1outa\_ d2dc3b\_ d1it2a\_  
d3eoka\_ d3g46a\_ d1qpwa\_ d3vrfb\_ d1ch4a\_ d1x9fd\_ d1hdsa\_ d2zfb\_ d1it2a\_  
d3mkbb\_ d1or4a\_ d3wtga\_ d1a4fa\_ d3fh9b\_ d3bomb\_ d3cy5a\_ d3at5b\_  
d1x9fa\_ d2oifa\_ d4lmb\_ d1cpcb\_ d3v57a\_ d1kn1a\_ d1cpca\_ d4f0ta\_  
d2vjha\_ d4po5b\_ d1eyxa\_ d1alla\_ d4f0tb\_ d1b33b\_ d1b8db\_ d4h0mb\_  
d2vjhb\_ d4lmb\_ d2vmlb\_ d1allb\_ d2vjta\_ d3dbja\_ d2vmla\_ d2vjtb\_  
d4f0ub\_ d1f99b\_ d4rmpa1 d1liaa\_ d1eyxb\_ d2uulb\_ d4lmsb\_ d4f0ua\_  
d2bv8a\_ d1f99a\_ d2bv8b\_ d2c71b\_ d3dbjb\_ d4rmpb1 d1b8da\_ d4h0ma\_  
d3v57b\_ d1kn1b\_ d1liab\_ d2uula\_ d2j96a\_ d1kyqa1 g1gxs.1 g1wht.1

d1azwa\_ d1mtza\_ d2xqfa\_ d1ea5a\_ d1f6wa\_ d1dx4a\_ d1qe3a\_ d1k4ya\_  
d4qwwa\_ d2ha2a\_ d3c8da2 d2pbla1 d1jkma\_ d1jjia\_ d1jjfa\_ d1jmx4  
d1jmx3 d1pbya3 d1b9ra\_ d1offa\_ d1frra\_ d3wcqa\_ d1e9ma\_ d1l5pa\_  
d1wria\_ d1i7ha\_ d3av8a\_ d1rfka\_ d3p1ma1 d3b2ga\_ d2bt6a2 d4iuaa3  
d4bvva\_ d5hpga\_ d3k65a\_ d1ki0a3 d1ki0a2 d1ki0a1 d1a0ha1 d1pmla\_  
d3sp8a3 d2feba1 d1mdwa\_ d1qxp4 d1ziva1 d1zcma1 d2m5ta\_ d1wqsa\_  
d5bpea\_ d2ipha\_ d1lvoa\_ d2bhga1 d3tnta\_ d3sjia\_ d3d23a1 d2fyqa\_  
d3tloa\_ d3zvea1 d2hrva\_ d3q3ya1 d4asha1 d4mh8a\_ d1mu2a2 d4i7ga1  
d3rp2a\_ g1ucy.1 d1fuja\_ d2zchp\_ d3w94a\_ d1si5h\_ d1lo6a\_ g2pka.1  
d1cgha\_ d1kigh\_ d1a5ia\_ d3s9ba\_ d1hj8a\_ d1ao5a\_ d2anya\_ d1q3xa1  
d1gvza\_ d1azza\_ d4gsoa\_ d2f91a1 d1iaua\_ d1gdna\_ d1eufa\_ g1fiw.1  
d1eq9a\_ d4nfea\_ d2rdla\_ d1spja\_ d1elva1 d1a7sa\_ d1ekbb\_ d1pfxc\_  
d1yc0a\_ d2aiqa\_ g1fiz.1 d4k60a\_ d4dgja\_ d1mzaa\_ d1lop0a\_ d3tjva\_  
d1pytd\_ d1sgfg\_ g1gg6.1 d2eeka\_ g1rtf.1 d1a0ja\_ d3g01a\_ d1pytc\_  
d4e7na\_ d1ddja\_ d1z8ga1 d2hlca\_ d1npma\_ d1brup\_ g1jou.1 d1sgfa\_  
d1autc\_ g2hnt.1 g1kdq.1 d1orfa\_ d3s69a\_ d4crga\_ d1fxya\_ d1bqya\_  
d2ftba\_ d1mpma\_ d2rcqa1 d1fdqa\_ d4lkpa\_ d1sa8a\_ d1vyfa\_ d1lpja\_  
d3vg7a1 d4azqa1 d1o8va\_ d5bvqa\_ d1p6pa\_ d2qo4a\_ d1lopba\_ d1yival  
d1o1va\_ d4bvma1 d4tkba\_ d4i3ba\_ d1bwya\_ d1ftpa\_ d1ggla\_ d4gkca\_  
d1cbia\_ d3p6da1 d1kqwa\_ d2a0aa1 d1dzka\_ d4tlja\_ d2a2ua\_ d4wfva\_  
d3t1da\_ d4iaxa\_ d3zq3a\_ d2nnda\_ d1i4ua\_ d1kxoa\_ d1bbpa\_ d1kt7a\_  
d1exsa\_ d3s26a1 d1l1f7a\_ d1qfta\_ d4gh7a\_ d1z24a1 d1qabe\_ d1xkia\_  
d1lew3a\_ d3bx7a\_ d4iawa1 d1n0sa\_ d1gkab\_ d3kzaa\_ d2k23a\_ d2l9ca1  
d2joza1 d1gm6a\_ d3kffa\_ d3saoa1 d1e5pa\_ d1yupa1 d1iua\_ d3lgia\_  
d3i77a\_ d2z9ia2 d4nsva\_ d1lcya2 d4jcna\_ d1agja\_ d1os8a\_ d1hpga\_  
d1p3ca\_ d1l1ja\_ d1e69a\_ d1mv5a\_ d3g60a4 g1ii8.1 d1ewqa2 d1ji0a\_  
d1qhla\_ d1v43a3 d2wmfa1 d1vpla\_ d1g2912 d4a82a2 g1f2t.1 d2d62a1  
d3tuic1 d2bbsa1 d3g60a3 d2ixea\_ d1sgwa1 d2qi9c\_ d3rlfa1 d3b60a1  
d3d31a2 d2pzea1 g1xew.1 d1jj7a\_ d1oxxk2 d2onka1 d1wlwa\_ d1iwea\_  
d1qf5a\_ d1vmaa2 d1nija1 d1np6a\_ d2p67a1 d3ihla\_ d1ls1a2 d1slma2  
d1liona\_ d2v40a\_ d1dj3a\_ d3hida\_ d2vo1a1 d2g0ta1 d1vcoa2 d1j8mf2  
d1g3qa\_ d1xjca\_ d1p9ba\_ d1qzxa3 d1ihua2 d1ihua1 d2qm8a\_ d1dj2a\_  
d4ioja\_ d1cp2a\_ d1yrba2 d1hyqa\_ d3gqba2 d1skye3 d1xp8a1 d1tf7a2  
d1tf7a1 d1ye8a1 d1skyb3 d2qe7d2 d4blta\_ d4huta\_ d3l1daa2 d4hyya\_  
d2i3ba1 d1cr1a\_ d3j9tb2 d3ntua2 d1vdza1 d2z43a\_ d1e9ra\_ d1nlfa\_  
d3ziaa2 d1n0wa\_ d3ziad2 d3j9ta2 d1pzna2 d3gqbb2 d2i49a\_ d1nnfa\_  
d1xvxa\_ d1ursa\_ d1iuda\_ d4m1va1 d1twya\_ d3e13x\_ d2nxoa1 d4pfua\_  
d3ttma\_ d1elja\_ d2qmwa1 d1us5a\_ d1y3na1 d1jeta\_ d1uqwa\_ d4f19a1  
d2esna2 d3thia\_ d3fasa1 d2uyeb\_ d2xwva1 d1r9la\_ d2fyia1 d1pb7a\_  
d2ozza1 d1sw5a\_ d1nh8a1 d1vr5a1 d2g29a\_ d1xs5a\_ d3lswa\_ d2z23a\_  
d3w9va\_ d3tcha\_ d1q35a\_ d1z7me1 d3q27a\_ d1p99a\_ d1ve4a1 d2i6ea1  
d4mcoa1 d4n8ya\_ d1eu8a\_ d1zbma1 d1hsla\_ d1ixca2 d1j1na\_ d1xvya\_  
d1y9ua\_ d2z22a1 d1xoca1 d4oera\_ d1wdna\_ d5f1qa1 d1xt8a1 d1i6aa\_  
d4gwoa\_ d4igta1 d1pc3a\_ d4mmpa1 d1o63a\_ d2czla1 d2onsa2 d4mija1

d1m8pa3 d3q3ma\_ d1za0a1 d2inca\_ d1jk0a\_ d2incb\_ d1mhyb\_ d3hf1b\_  
d1mtyb\_ d1r2fa\_ d2uw1a\_ d1mhyd\_ d3n37a\_ d1afra\_ d1oquc\_ d1syya\_  
d1mtyd\_ d2o1za\_ d1uzra\_ d1smsa\_ d2fkza\_ d1zuja1 d1s3qa1 d2fjca1  
d1z6om1 d1veia\_ d4dyya\_ d1jiga\_ d3gvya\_ d2pyba\_ d4cy9a1 d3bvfa1  
d1r03a\_ d2cf7a\_ d1nf4a\_ d1zs3a1 d4iwka\_ d3ka8a\_ d3np0x\_ d1lb3a\_  
d4e6ka\_ d1z6oa1 d2fzfa1 d4dyua\_ d3ge4a\_ d1jgca\_ d4am4a\_ d2z6ma\_  
d1ji5a\_ d1vlga\_ d1lkoa1 d1krqa\_ d3qz3a\_ d1o9ra\_ d2ffxj\_ d1euma\_  
d1yv1a1 d2v2pa\_ d1j30a\_ d4di0a\_ d1dpsa\_ d2qzxa\_ d2asia\_ d1psoe\_  
d1miqa\_ d1smra\_ d2h6ta\_ d1pfza\_ d1lizda\_ d3hd8a\_ d1j71a\_ d1dpja\_  
d4aa9a\_ d1t6ex\_ g1b5f.1 g1lya.1 g1htr.1 d1qdma2 d1bxoa\_ d1wkra\_  
d1tzsa\_ d1libqa\_ d2qzwa\_ d3azya\_ d3wvja\_ d1upsa1 d1ajoa\_ d2hyka\_  
d1ajka\_ d2vy0a\_ d1o4ya\_ d3o5sa\_ d3d6ea\_ d3atga\_ d1dypa\_ d1lumza\_  
d3i4ia\_ d1bdqa\_ d3ggta\_ d3ixoa\_ d1mrxa\_ d2haha\_ d1tw7a\_ d4njsa\_  
d1sgua\_ d2p3da\_ d1nsoa\_ d3d3ta\_ d2rkfa\_ d1c6ya\_ d2rspa\_ d3ogpa\_  
d3ekwa\_ d2o4na\_ d2j9ja\_ d1baia\_ d3ggua\_ d3lzua\_ d4npua\_ d4j55a\_  
d2r8na\_ d2fxda\_ d2p3ca\_ d4dqea\_ d3ttpa\_ d3t3ca\_ d2p3aa\_ d2hc0a\_  
d2fdda\_ d3mwsa\_ d1k8rb\_ d1wgra1 d1ef5a\_ d1wfy1 d1e8ya3 d1wgya1  
d1lfda\_ d2cs4a1 d1wxma1 d2byea1 d3kh0a1 d2byfa1 d1wxaa1 d1e7ua3  
d1h4ra3 d4yl8a1 d2a16a3 d1wgda1 d1wgg1 d4q5eb\_ d1wjna1 d1se9a\_  
d3n3kb\_ d1wz0a1 d1we6a1 d2m0xa\_ d2gbka\_ d3rt3b1 d1wh3a1 d1sifa\_  
d2ekek2 d4ii2b1 d4hk2a1 d1c3ta\_ d1m94a\_ d1wgha1 d1ttna1 d1j8ca\_  
d1wx8a1 d3v6cb1 d2ma9b\_ d4i6lb1 d1bt0a\_ d2jvca1 d1iyfa\_ d2k1fa\_  
d1wxva1 d1wf9a1 d1t0ya\_ d2io0b2 d1x1ma1 d2gbma\_ d1zw7a1 d2m17a\_  
d1ud7a\_ d1we7a1 d2lwpa\_ d2gbja\_ d1wjua1 d1v6ea1 d1v86a1 d4eewa\_  
d1wiaa1 d4icva\_ d4gu2a\_ d1wx7a1 d1wy8a1 d4hjka1 d2faza1 d1v5oa1  
d2a13a1 d2cr5a1 d1wj4a1 d1s3sg\_ d3ubra\_ d1qo8a1 d1d4ca1 d2k3va\_  
d1ft5a\_ d1qdba\_ d1m1qa\_ d2j7aa\_ d1h21a\_ d1ogyb\_ d4fasa\_ d1jnia\_  
d1oaha\_ d1sp3a\_ d1ps9a2 d1lqta1 d1cjca1 d2h0ba\_ d2erfa\_ d1h30a2  
d3mw4a1 d1pz7a\_ d2r1ba\_ d3v64a1 d1d2sa\_ d3bopa1 d3mw3a1 d1okqa1  
d1okqa2 d1c4xa\_ d1j1ia\_ d2rhwa\_ d1wioa4 d1ccza2 d1vcaa1 d1dr9a2  
d1ic1a1 d2d9qb1 d2nxyb2 d1um8a\_ d1ixza\_ d1qvra2 d1qvra3 d1qzma\_  
d1sxjc2 d1jr3d2 d2p65a\_ d1l8qa2 d1g8pa\_ d3hu3a3 d1sxjd2 d1njfa\_  
d1in4a2 d1sxja2 d1tuea1 d2ce7a2 d1w5sa2 d1sxjb2 d1d2na\_ d1ny5a2  
d1ofha\_ d2gnoa2 d2a5yb3 d1fnna2 d1u0ja1 d1lv7a\_ d1iqpa2 d2fnaa2  
d1ixsb2 d4gita\_ d1sxje2 d2e3fa\_ d1mm0a\_ d2e3ea\_ d21lda\_ d2ny8x\_  
d2e3ga\_ d2ny9x\_ d2nz3a\_ d2lj7a\_ d1n4na\_ d2m8bb1 d2kyqa\_ d3psma\_  
d1jkza\_ d1jxca\_ d2g1la\_ d1ugla\_ d4uj0a\_ d2k4ua\_ d1hp2a\_ d2lu9a\_  
d1baha\_ d2meoa1 d1wm7a\_ d1hlya\_ d1n8ma\_ d1jlza\_ d1wpda\_ d1c55a\_  
d1pvza\_ d1wt7a\_ d1rjia\_ d1wz5a\_ d1m2sa\_ d1pjva\_ d1c49a\_ d1qkya\_  
d2ktca1 d1wmta\_ d1du9a\_ d1j5ja\_ d1r1ga\_ d1t0za\_ d2i61a\_ d1t1ta\_  
d1sn4a\_ d1kv0a\_ d2lkba\_ d1npia\_ d1wwna\_ d1pe4a\_ d2kbka\_ d2li7a\_  
d2kbha\_ d1dq7a\_ d1sega\_ d1omya\_ d1zywa1 d1jzaa\_ d1n9wa1 d1bbua1  
d1c0aa1 d1b8aa1 d1l0wa1 d3a74a1 d1eova1 d1t61c1 d1iyjb4 d1iyjb5  
d1iyjb3 d1o7ia\_ d4ipca1 d1x3ea\_ d4apva\_ d1jb7a1 d1jb7a2 d1jb7a3

d3kdfa\_ dlue1b\_ dlwjja1 d3eiva\_ dlxjva2 dlxjva1 d2ccza2 dlse8a\_  
d11loc\_ dljb7b\_ dlqvca\_ d3ulla\_ dlqzga\_ dlmiua4 dlmiua5 dlmiua3  
d1y14b1 d2nn6i1 d1i94l\_ d2zjra2 dlsmxa\_ d2qamc2 dlhh2p1 d2r7da1  
d1r12a2 d1wfga1 d3bzka4 d1x6oa2 d3a0ja\_ d2j01d2 d2ja9a1 d4q15a\_  
d1hr0w\_ d1luza\_ d2n3sa\_ d2vnud1 dlh95a\_ dlgo3e1 d2nn6h1 dlne3a\_  
d2mo1a\_ dliz6a2 dljjga\_ d1e3pa2 d2ix0a3 d2ix0a2 d2lxja\_ dlueba3  
dlueba2 d2z0sa1 d1u0la1 d2ix0a1 d2eifa2 d2je6i1 d3i2za1 d2c35b1  
d2ahob2 d1t9ha1 d3i4oa\_ d2qall1 dljt8a\_ d2nn6g1 dlg6pa\_ d3cama\_  
d1i94q\_ d1d7qa\_ d2ba0a1 d2vnud2 d2vnud3 dlkhia2 d2qalq1 dlwi5a1  
d1xtda2 d1ny4a\_ d2a1ka\_ dlje5a\_ dlrpma\_ d2shpa1 dlyfoa\_ dl18ka\_  
d2ooqa1 dlq4us2 d1p15a\_ d1lara2 d1lara1 dlwcha\_ d2fh7a2 d2fh7a1  
d1ohea1 d1ohea2 d2f4da\_ d1rxda\_ d2hxpa\_ dlxria\_ dlfpza\_ d3ezza\_  
d4y2ea\_ d1i9sa\_ d1c1la\_ d4lbqa\_ d1a78a\_ d4no4a\_ d3zsja\_ d3duia\_  
dlg86a\_ dlis3a\_ dlqmja\_ dlhlca\_ d1tdha3 dlq3ba3 dlk82a3 glqmo.1  
g1len.1 d3zyra\_ dlfnya\_ dl1n47a\_ g21tn.1 dlavba\_ d3usua\_ dl1dhkb\_  
dlf9ka\_ dlukga\_ dlq8wa\_ dlq9fa\_ dlwbf\_a\_ d3wcsa\_ dlq7ya\_ glloe.1  
dlmvqa\_ dlhq1a\_ dlv6ia\_ dl1dbna\_ dlfx5a\_ d4l8qa\_ dl1ioaa\_ d3n35a\_  
d3h33a\_ dlrwja\_ dl19hca\_ dl1os6a\_ d3bxua\_ d3h4na\_ dl1i77a\_ d3caoa\_  
dlj0pa\_ dl1duwa\_ dl1ofwa\_ d2e84a\_ dl1hh5a\_ dl1gyoa\_ d3h34a\_ dl1dszb\_  
dl1a6ya\_ d3cbba\_ dl1ynwa1 dl1r4ia\_ dl1hcqa\_ d2hana\_ d2hanb\_ d2enval  
dl1kb4b\_ d2n11b\_ dl1lola\_ dl1cita\_ d2dara2 d2dara1 dl1wyha2 d2dloa2  
dl1rutx4 dl1rutx3 d2cuqa2 dl1x41a2 dl1x41a1 dl1x3ha2 dl1x3ha1 d2d8za1  
dl1x61a2 dl1x6aa1 dl1x6aa2 d2cora2 d2cora1 dl1v6ga1 dl1v6ga2 d2d8za2  
dl1x64a1 dl1x64a2 dl1b8ta1 d2co8a1 dl1x63a2 d2dj7a2 d2dj7a1 d2cu8a2  
d2cu8a1 dl1g47a2 dl1g47a1 dl1j2oa1 dl1wyha1 d2dloa1 dl1wiga1 dl1wiga2  
d2cupa2 d2cupa3 dl1x68a1 d2d8ya2 d2d8ya1 dl1m3va2 dl1x62a1 dl1x68a2  
dl1x61a1 dl1b8ta3 dl1b8ta2 d2d8xa2 d2d8xa1 dl1x4ka1 dl1x4ka2 d2cuqa1  
dl1m3va1 d2co8a2 dl1x63a1 d2cura1 d2cura2 dl1x62a2 dl1op9a\_ dl1y01a1  
dl1etzbl dl1egj11 d2gsib1 dl1nj9a1 d4jfhdl dl1aqk11 dl1t2ja\_ dl1lo4h1  
dl1zvyal dl13v4v11 d4enec1 dl1kxtb\_ d5e8ea1 d2pxya\_ d4weud\_ dl1xiwc\_  
d2esvd1 dl1qznh\_ dl1ogael dl1f4xh1 d4n1hb\_ d3ezjb1 d3mlw11 dl1kfah1  
dl1letza1 dl1b4jh1 d3cfic\_ d4w68a\_ d2arja1 dl1ek3a\_ d2ok011 dl1vera\_  
dl1uwgh1 dl1blnb1 dl1fpth1 dl1rzga1 d2giya1 d4m3kb1 dl1nc2a1 d2nyyd1  
dl1ncna\_ dl1fbih1 d5dxwa\_ d4fqqa1 dl1dqdh1 dl1jfq11 dl1kelh1 dl1faih1  
dl1frgl1 dl1figl1 d4m6n11 dl1fo0a\_ d4hxb11 d3b5ga\_ d3quyd1 d2h9gb1  
dl1i8kb\_ d2dd8h1 d2ck0h1 dl1eaja\_ d4w6wb1 d2a6ib3 dl1t66d1 d2e27h\_  
dl1obl1b1 dl1f11b1 d2v7na1 dl1ad0a1 d2xt1b1 dl1pskh1 d4i13b1 d2op411  
dl1a0ql1 dl1uwe11 dl1za3a1 dl1ncb11 d4uu9a\_ dl1bm3h1 dl1cloh1 dl1nqba2  
dl1cf8h1 d4y5va\_ dl1mhph1 d5anma1 d4cdgc1 d4ldeb\_ dl1y01b1 d2pcpb1  
dl1z3gl1 dl1dfb11 dl1fh5h1 d3g5xa1 dl1tzib1 d4dn311 d3zhka1 d2b1hh1  
d2uyla1 dl1f3dh1 dl1nj9b1 d2agjh1 d2h1pl1 dl1q72h1 d8fabb1 dl1ndmb1  
dl1rjca1 d4u6hb1 d3upca\_ d2fbj11 dl1osph1 dl1tvda\_ d2cjev\_ d4fhbd1  
dl1bd2d1 dl1rz7h1 d3nn8a\_ dl1blna1 dl1knoa1 dl1nfda1 d2bmkb1 dl1dq11\_  
dl1igyb1 dl1igfl1 dl12e8h1 d3utza1 dl1nc2b1 dl1rihh1 d4mwf11 d4jvpa1

d1mieh1 d1rhfa1 d1fgn11 d1sbsh1 d1lp9e1 d1dn0a1 d4lqfl1 dliaih1  
d1kgcd1 d1mh5b1 d1gpol1 d2g60h3 d1f8tl1 d2jixd1 d4grwh\_ d1fo0b\_  
d1bfob1 d1axsa1 d1u9ka\_ d1nmbh\_ d1h8na1 d1h8na2 d1jguh1 d4eura1  
d3sdy11 d35c8h1 d1w7211 d1mvub\_ d1i9rh1 d1ob1a1 d4wenb\_ d1yeeh1  
d3ietc1 d1f58h1 d1ad0b1 d1mqkl\_ d1nbvh1 d4b50a\_ d3r8bb\_ d1baf11  
d1mamh1 d4rgne1 d2gsgb\_ d35c811 d1bafh1 d1ai1h1 d2pcpa1 d2fath1  
d2x1pa\_ d1orsb1 d1libg11 d1shma\_ d1a2yb\_ d1u0qa\_ d2coqa\_ d1hilb1  
d1qfwi\_ d1jv5b\_ d1fn4b1 d5e0qa\_ d1nsnh1 d1plgl1 d4ocxl1 d1kb5h1  
d1rzhf1 d1pg7x1 d2fx7h1 d2oi9c\_ d1l7i11 d3eyva1 d1d5i11 d4ffyl\_  
d1tet11 d1a6wh\_ d1ac6a\_ d3dvfa\_ d1nfdel d1mimh1 d1ri8a1 d1jhlh\_  
d3dura\_ d1fskb1 d1f97a1 d3so3b1 d2ak4d1 d1lp9f1 d4z7wf1 d1l7th1  
d4y5ya\_ d4x7ec1 d1emth1 d1ikfl1 d1nlbh1 d4utal1 d1bjma1 d1eapb1  
d1u6ah1 d2dtgd1 d1kj2b\_ d1xeda1 d1cleh1 d1fgvh\_ d2bnub1 d2fb4h1  
d2dtgb1 d1ktrh\_ d1jpth1 d1qkz11 d4hepg\_ d2atpb1 d1flrh1 d2hrp11  
d1mvfa\_ d1iaim1 d3k80a1 d2jb5h1 d3zkxc\_ d4grwe\_ d1it9h1 d1rhbb1  
d3w9ec\_ d1e4wh1 d1sy6h1 d2j6eh1 d3qxta\_ d1jglh1 d1p7ka1 d1tzhb1  
d4n8pa1 d1gaf11 d2jelh1 d1wioa2 d4i0cc1 d1cicb1 d1lmka2 d1lmka1  
d1iqwh1 d1orqb1 d1ejoh1 d1jnlh1 d4zga1\_ d43c9b\_ d1ggbl1 d1wejh1  
d3q6fa1 d1f3dj1 d3c6la1 d1bqlh1 d3p9wb\_ d1a3r11 d1h0db1 d2uzil\_  
d1eo811 d1qfwl\_ d1n7m11 d1igja1 d1c5ch1 d2a9mh\_ d1rmfh1 d1fj1b1  
d4heme\_ d1ccza1 d1a5fh1 d1ogad1 d1dlfh\_ d1qa9b\_ d1vgel1 d3qskb\_  
d1sjxa\_ d4ozfg1 d1sq2n\_ d1qd0a\_ d1kcvh1 d1c5db1 d3qcul1 d8faba1  
d3bn9d1 d1mjuh1 d4y8dc\_ d7fabh1 d3dvgb1 d1lo011 d1a6tb1 d1gigh1  
d1kcrh1 d2hwz11 d1yjdc1 d3c1fl1 d4krna\_ d1d171\_ d1e6o11 d1mexh1  
d3r0ma\_ d4kkna\_ d1fns11 d1oaqh\_ d1rzia1 d1ucbh1 d1ncw11 d4b41a\_  
d1nfdfl d2mpah1 d2d7t11 d4grwf\_ d4b5ea\_ d1lk3h1 d3u79a\_ d4u3xa\_  
d1ghfl1 d1bvkb\_ d1mcww1 d1b88a\_ d1jrhh1 d32c2b1 d4wemb\_ d1dsfh\_  
d1op3h1 d1ce111 d1iqda1 d1qoka1 d1qoka2 d1qfuh1 d2crya1 d1ay1h1  
d1oaql\_ d3ab0b\_ d1rur11 d1t4kb1 d1bz7b1 d1n0xh1 d1for11 d1lucb11  
d4w6yb\_ d43c9a\_ d2aabl1 d1tzia1 d4n1ca\_ d1k6qh1 d3g9ab\_ d4tvsa1  
d1ligmh\_ d1pz5b1 d3dx9a1 d3wxwh\_ d1kcul1 d3eaka\_ d4qlra1 d1cr911  
d1d9ka\_ d1f4x11 d1deea1 d2i27n2 d1c12a1 d2orb11 d1j8hd1 d1mcph1  
d1c5da1 d1kenh1 d1bd2e1 d1h5ba\_ d4x7fc1 d3upaa\_ d1t3fa1 d1indh1  
d2dtgc1 d4hc111 d1zv5a1 d4wgvb\_ d1uwgl1 d4f37k1 d1aqkh1 d1vesa\_  
d3zkqd\_ d1fpt11 d1lo411 d1knob1 d3rrqa\_ d1ct8b1 d4orz\_ d1mlbb1  
d4hgkc1 d1dqdl1 d1bogb1 d4ozhe1 d1dr9a1 d1i7za1 d1dn0b1 d1kell1  
d1rzib1 d1ypzf1 d1wtla\_ d1hkfa\_ d1fail1 d1figh1 d2vyre\_ d1sjva\_  
d1ohqa\_ d1bfoa1 d1pkqb1 d1mjul1 d1b4j11 d1nsn11 d2arjb1 d1p4bh\_  
d4aj0a\_ d3nn8b\_ d2rcja1 d1f2xk\_ d4v1dd\_ d1adqh1 d2eksa\_ d4k3ga\_  
d1jfqh1 d1uweh1 d1frgh1 d4gftb\_ d1uz8b1 d4nlea\_ d1bm311 d1clol1  
d3mcka1 d2vq1a1 d1ae6h1 d4aq1b1 d1uj3b1 d1nbqa1 d1fh511 d2ck011  
d2ywza\_ d1q7211 d4nxbx\_ d1hila1 d4hz1b1 d2j8811 d1zmya1 d1cd0a\_  
d1a4ka1 d1psk11 d1a0qh1 d4krmb\_ d1ncbh1 d2fbjh1 d1j8he1 d1i3ua\_  
d1cf811 d1fe8h1 d2p1ya1 d1eeqa\_ d2x89a\_ d1ol0a\_ d2r0lh1 d1ub5a1

d1dfbh1 d3eyvb1 d4jdvb1 d4p2cg\_ d2gsia1 d2agj11 d1u3ha1 d2h1ph1  
d1rihl1 d1fskc1 d1boga1 d2a7711 d1ospl1 d1qfoa\_ d3dwta\_ d2fx711  
d1rz711 d3stba1 d1pkqa1 d1b6da1 d1dzba2 d1dzba1 d1kj2a\_ d411ha\_  
d1rrgb1 d1dq1h\_ d12e811 d1miel1 d1jmaa\_ d1sbs11 d1fgnh1 d1f5811  
d1mqkh\_ d1ndgb1 d3qeg11 d1iail1 d2aw2a1 d1tqbc1 d3fo2a1 d4dkaa\_  
d1f8th1 d2g6011 d2ywya\_ d1uj3a1 d1yc7a\_ d3bd3a\_ d4w6xb1 d1nmb1\_  
d1i8ka\_ d1rjlb1 d1ypze1 d1p7kb1 d1kxqe\_ d1gpoh1 d2z4qa1 d1w72h1  
d1i9rl1 d4qgya1 d4xt1c\_ d2qqnh1 d1cica1 d3c08h1 d2cd0a\_ d2bdnh1  
d1hnga1 d1maml1 d1nldh1 d1cr9h1 d4lcih1 d3bkyh1 d3qg711 d1ai111  
d1kxvc\_ d4iosd\_ d117ih1 d2x1qa\_ d1ub6b1 d3k74b\_ d1libgh1 d1teth1  
d1igya1 d1hxma1 d2x6ma\_ d2e71a\_ d5e03a\_ d1qfwm\_ d2r0kh1 d1igjb1  
d1rurh1 d1plgh1 d1mj8h1 d1yuhb1 d3fmg11 d1rzf11 d1emt11 d1ad9b1  
d1igtb1 d1nlbl1 d1d5ih1 d3k7ua\_ d4ffyh\_ d1bwwa\_ d3dvga1 d1a6ta1  
d1fgvl\_ d4qxgl1 d1mim11 d1jhl1\_ d2hffb1 d2hh011 d1qkzh1 d117t11  
d1afvh1 d1iaii1 d2cjuh\_ d1um5h1 d2ghwb2 d2ghwb1 d1kgce1 d2fgwh1  
d1ikfh1 d1dvfd\_ d2i24n1 d2xtjb\_ d1za3b1 d2yc1a\_ d2hh0h1 d2x1oa\_  
d1bvka\_ d1rjla1 d5e7ba1 d1igta1 d1il1b1 d2fb411 d1mvua\_ d1jpt11  
d32c2a1 d1fvca\_ d1iqdb1 d2hrph1 d2p4ab\_ d4qo1a\_ d1p2cb1 d1wt5c\_  
d1t4ka1 d5c1mb\_ d1it911 d1bz7a1 d1b2wh1 d1e4w11 d1jnl11 d1yedb1  
d1za6b1 d3u7aa\_ d1igfh1 d3gnml1 d1orsa1 d1wejl1 d1a2ya\_ d1hxmb1  
d1gafh1 d2j4wh1 d1pz5a1 d1j05a\_ d1a3rh1 d4fq111 d1qfwh\_ d1eo8h1  
d1n7mh1 d4s11a\_ d1kegh1 d5da4a\_ d1iqw11 d3whxb1 d1vgeh1 d1deeb1  
d1c12b1 d1t2q11 d1ad9a1 d3gsnb1 d3b2uc1 d1ggbh1 d1t3fb1 d1nak11  
d4ocmc\_ d1lila1 d2v7hb3 d2esve1 d1mcoh1 d2qr0b1 d2q3aa\_ d1ct8a1  
d1kcr11 d2pxyb\_ d2uzih\_ d5c3ld\_ d3durb\_ d1c5c11 d2ak4e1 d1d17h\_  
d1xiwd\_ d1mlba1 d1rmfl1 d1i7zb1 d1dlf1\_ d2xa3a\_ d5bq7b1 d1dqqb1  
d3h4211 d1egjh1 d1kcv11 d1fe811 d2j6e11 d1f3rb2 d11k311 d1sm3h1  
d1q0xh1 d1ghfh1 d7fab11 d1igch1 d1l00h1 d4idla\_ d5c2b1\_ d1jrh11  
d1i11a1 d3zhda1 d4kfzc\_ d1b0wa\_ d1e6oh1 d1mex11 d4krpb\_ d1fnsh1  
d1ncwh1 d4hgma\_ d4eigb1 d4rzca\_ d2mpa11 d4y5xa\_ d5en2b1 d3lrga1  
d4ej1c1 d1rhha1 d1j05b\_ d1forh1 d1q9wb1 d2wzpd\_ d2aq2a1 d1h0da1  
d3revb1 d2ij0c1 d1tzha1 d4m7j11 d1k6q11 d3b9kc1 d1igml\_ d3qeua1  
d1dsfl\_ d1ce1h1 d1kcu11 d1zvha1 d1zvoa1 d1tqbb1 d1ay111 d2qsc11  
d2cgrh1 d1nl0h1 d1ken11 d3eo0a1 d4n9ob1 d1n0x11 d3k1kc\_ d1c4qa\_  
d1prtc1 d2wv6d\_ d1ltrd\_ d4l63b1 d1r4pb\_ d1prtd\_ d1t10f\_ d2bosa\_  
d1prtb1 d3chbd\_ d2aq2b1 d1ck1a1 d1lenfa1 d1i4pa1 d1v1oa1 d1et9a1  
d1lesfa1 d2g9hd1 d4ohja1 d1klud1 d1bxta1 d1eu3a1 d1ty0a1 d1fnua1  
d2qaln1 d2cqva1 d1fhga\_ d2k1ma\_ d2d12a1 d1biha3 d1biha1 d1biha4  
d3qp3a1 d1glca\_ d1gxea\_ d1cvsc2 d1cvsc1 d1xmwa2 d2otpa2 d1biha2  
d1rhfa2 d2fcba2 d2fcba1 d1wwbx\_ d1gsma2 d1lepfa1 d1lepfa2 d2dava1  
d1waaa\_ d1f97a2 d1x44a1 d1vcaa2 d1fnla2 d1fnla1 d3b5ha2 d3h8na2  
d3h8na1 d1jbja1 d1jbja2 d1pd6a\_ d1f2qa2 d1f2qa1 d3cx2a\_ d1nbqa2  
d3b5ha1 d1n26a1 d1xiwb\_ d1xaua\_ d1fltx\_ d2ifga1 d1olla1 d1olla2  
d1cs6a4 d1cs6a3 d1cs6a2 d1cs6a1 d2gw5a2 d1sy6a1 d1xiwa\_ d1lucta2



d1lucta1 d1ry7b2 d1gl4b\_ d1qz1a3 d1lolza1 d2c9aa1 d1lwca\_

**Family-40 (b.60.1.1)**

**Positive dataset contains 19 protein sequences.**

d4tlja\_ d4wfva\_ d3t1da\_ d4iaxa\_ d3zq3a\_ d2nnda\_ d3s26a1 d4gh7a\_  
d1z24a1 d1xkia\_ d3bx7a\_ d4iawa1 d3kzaa\_ d2k23a\_ d2l9ca1 d2joza1  
d3kffa\_ d3saoa1 d1yupa1

**Negative dataset contains 3923 protein sequences.**

d1m32a\_ d1libja\_ d1c7na\_ d1iuga\_ d4q75a\_ d2bkwa1 d1t3ia\_ d1n8pa\_  
d1qz9a\_ d1jff9a\_ d1eg5a\_ d1p3wa\_ d3kgwa\_ d1c11a\_ d2ctza1 d1vjoa\_  
d2rfva\_ d1gc0a\_ d1cs1a\_ d1d2fa\_ d2ch1a1 d1qgna\_ d1pffa\_ d1elua\_  
d1c7ga\_ d2v1pa1 d2ez1a\_ d1u08a\_ d1lc5a\_ d1b5pa\_ d2ay1a\_ d1bw0a\_  
d3pd6a\_ d7aata\_ d2csta\_ d1j32a\_ d1fg7a\_ d4wlha\_ d1o4sa\_ d1v2da\_  
d1gdea\_ d1m6sa\_ d1v72a1 d1svva\_ d1ajsa\_ d1wsta1 d2f8ja2 d1vp4a1  
d1xi9a1 d2gb3a1 d1yaaa\_ d2ovga\_ d1sq8a\_ d1rzsa\_ d3kz3a\_ d3orca\_  
d1xkta1 d2hfka\_ d1jmkc\_ d5d3ka\_ d1sefa\_ d1sfna\_ d1sq4a\_ d1r0ka3  
d1vkoa2 d1vm6a2 d3qvsa2 d1gr0a2 d1p1ja2 d1g8fa3 d1qnia1 d1libya\_  
d1f56a\_ d1bypa\_ d1azca\_ d1ws8a\_ d3u25a\_ d1cuoa\_ d1lid2a\_ d1rkra\_  
d2iaac\_ d4dp1x\_ d1nwpa\_ d2gima\_ d2i7sa\_ d1qhqa\_ d3ehbb1 d1fftb1  
d1gyca3 d1hfua2 d1kbva1 d1kbva2 d1sdda1 d1sdda2 d1gyca1 d1gyca2  
d1mzya1 d2bw4a1 d1aoza1 d1aoza3 d1aoza2 d1kyaa2 d1kyaa3 d1kyaa1  
d1mzya2 d4e9sa1 d1sddb1 d1sddb2 d1hfua1 d1hfua3 d1oela2 d1oela1  
d1v10a2 d1v10a3 d1v10a1 g1f8v.1 d2bbvc\_ d2cfba1 d1dfoa\_ d1o69a\_  
d1bj4a\_ d3k28a\_ d2bwpa\_ d3lg0a\_ d2fnua\_ d3ou5a\_ d1z7da1 d1b9ha\_  
d1iaya\_ d4msoa\_ d1bs0a\_ d1s0aa\_ d1sffa\_ d3tqxa\_ d1mdoa\_ d3qboa\_  
d3pgya\_ d1bjna\_ d2dkja\_ d1ejia\_ d1vefa1 d4wxga\_ d3bs8a\_ d3gbxa1  
d1w23a\_ d1a3qa1 d1iknc\_ d3brda1 d1oy3c\_ d1imhc1 d1gjia1 d1zk9a1  
d2cxka1 d2bema\_ d1ea9c1 d1qhoa1 d2fhfa2 d2fhfa1 d1k3ia1 d1j0ha1  
d1cxl1a1 d2bhua1 d1edqa1 d1f1sa2 d1lut9a2 d1gvia1 d1txka1 d4alac\_  
d1rera1 d1s6na\_ d3uzqb\_ d2phla1 d1fxza2 d1fxza1 d1lrha\_ d1uija1  
g1dgw.1 d2v09a\_ d1uika2 d1uika1 d1dgwa\_ d1ds6b\_ d1fstb\_ d1ex0a1  
d1g0da1 d1ju8a\_ d1tafa\_ d1bh9b\_ d1tafb\_ d1q9ca\_ d1h3ob\_ d2byka1  
d1n1ja\_ d4g92b\_ d1bh9a\_ d1jfia\_ d1h3oa\_ d2bykb1 d1n1jb\_ d1cg2a1  
d1yloa2 d1y7ea2 d1y0ya3 d1lfwa1 d1vixa1 d1fnoa4 d1vhua2 d1ysja1  
d1vhea2 d1z21a1 d2fvga2 d1vgya1 d1r3na1 d2grea2 d1xmba1 g1q71.1  
d2bjca1 d2hsga1 d1qpza1 d1efaa1 d1ydw2a2 d2nvwa2 d1zh8a2 d1qkia2  
d1xeaa2 d1t1ta2 d2b5ea2 d2b5ea3 d2b5ea1 d2b5ea4 d2kp1a1 d2kp2a1  
d1hyua3 d1hyua4 d1j08a1 d1j08a2 d1orva2 d1xfda2 d3gpdg2 d2q49a2  
d1hdgo2 d2g17a2 d2cvoa2 d2czca1 d3pwka2 d1obfo2 d1i32a2 d1zyao2  
d2pkqo2 d1b7go2 d2hjsa2 d1cf2o2 d1vkna2 d1nvmb2 d2msya\_ d2djoa1  
d2r5za\_ d1au7a1 d1f43a\_ d2lmda1 d1akhb\_ d1s7ea1 d3nara\_ d1zq3p1  
d2craa1 d1mija\_ d4uuta\_ d3a01a\_ d1x58a1 d3rkqa1 d3cmya1 d2cqxa1  
d2da6a1 d1e3oc1 d1fjla\_ d1mh3a1 d1x41a1 d1wh7a1 d1gt0c1 d2mw8a\_  
d1lfup\_ d1x2ma1 d1b72a\_ d1wi3a1 d1jgga\_ d1wjha1 d1x2na1 d1mnmc\_  
d2cuea1 d3k2aa\_ d2hosa\_ d2jwta2 d1pufa\_ d1oact1 d2hi3a\_ d1b8ia\_

d4j19a\_ d3lnqa\_ d1wh5a1 d1b8ib\_ d1hcra\_ d1tc3c\_ d1gdta1 d1u78a2  
d6paxa1 d1k78a1 d1k78a2 d2iu5a1 d1zk8a1 d2g7sa1 d2fd5a1 d2np5a1  
d1z0xa1 d2id6a1 d2d6ya1 d2i10a1 d1vi0a1 d2oi8a1 d3c07a1 d2ns7a1  
d2fq4a1 d2yvea1 d1t33a1 d2o7ta1 d1rkta1 d2np3b1 d2g7ga1 d2gena1  
d2fbqa1 d2g7la1 d2gfna1 d2g3ba1 d2jj7a1 d2hyja1 d1sgma1 d1ui5a1  
d2hkua1 d2id3a1 d4jyka1 d1b10a1 d1d5ya1 d1d5ya2 d3lv8a\_ d1s3ga1  
d1zaka1 d1s4qa\_ d3tvta2 d1uf9a\_ d1khta\_ d1ckea\_ d1osna\_ d1p5zb\_  
d4tmka\_ d3cm0a\_ d1tmka\_ d1jaga\_ d3h86a\_ d1t0hb\_ d1nn5a\_ d2h92a\_  
d3kb2a1 d2c95a1 d1yj5a2 d1kgda\_ d1ly1a\_ d2ak3a1 d1vyva2 d1deka\_  
d2grja1 d1p3ja1 d1y63a\_ d1e4ya1 d1s96a\_ d3iija1 d1lvga\_ d1nksa\_  
d1vyua2 d4e22a\_ d1qf9a\_ d1q3ta\_ d1ki9a\_ d1lw7a2 d1teva\_ d1kjwa2  
d1gsia\_ d2iyva2 d1kaga\_ d1viaa\_ d1e6ca\_ d1x6va3 d1odfa\_ d1uj2a\_  
d4gi7a\_ d2jeoa1 d1k6ma1 d1z0ja1 d3umra2 d3gj0a1 d2gaoa1 d1yzga1  
d1x3sa1 d1g7sa4 d1puja\_ d1udxa2 d1kk1a3 d2o52a\_ d1jwyb\_ d1zcaa2  
d1zcba2 d2fv8a1 d2cjwa\_ d3dz8a1 d1xzpa2 d1vg8a\_ d4qxaa\_ d2ew1a1  
d1x1ra1 d2bcgy\_ d3doea1 d3cona\_ d3rega\_ d3wyga\_ d1upta\_ d2b6ha1  
d1zd9a1 d1lnza2 d1r5ba3 d1n0ua2 d1r2qa\_ d2f91a1 d2rhda\_ d3q3jb\_  
d3q85a\_ d1efma1 d1r8qa\_ d2gf9a1 d2akab1 d1ek0a\_ d1z08a1 d2gcoa1  
d2dyla2 d4g01b\_ d2cxxa1 d1svia\_ d3q72a\_ d1ni3a1 d4ac9a4 d2erxa1  
d2bmea\_ d1wxqa1 d2gf0a1 d4ldja1 d1zunb3 d1d5ca\_ d4lv5b\_ d1efca3  
d1kmqa\_ d2g6ba1 d3lrpa\_ d1tada2 d2y8ea\_ d4rd4a1 d1z06a1 d2heia\_  
d3a58b\_ d1u01a2 d1d2ea3 d1zj6a1 d2ocba\_ d3rwoa\_ d1mr3f\_ d2e9sa1  
d4u5xa1 d2iwra\_ d2fn4a1 d3bwdd\_ d2nzja1 d2atva1 d2ksqa\_ d3l43a\_  
d1mkya2 d1mkya1 d1wmsa\_ d1jnja3 d2rmka\_ d1f6ba\_ d1f60a3 d1gota2  
d1jala1 d2fh5b1 d1g16a\_ d2wblc\_ d1m7ba\_ d1wf3a1 d1f5na2 d1t9ha2  
d1z6xa1 d1z0aa1 d2fg5a1 d2a5ja1 d2bcjq2 d1s0ua3 d1ky3a\_ d4y0va\_  
d4lhwa\_ d2qmea1 d2atxa1 d1egaa1 d1ryha\_ d1moza\_ d1nrjb\_ d2erya1  
d3bfka\_ d1puia\_ d3j3az1 d3t5ga\_ d1shza2 d3defa\_ d2f7sa1 d3raba\_  
d3tsoa\_ d3aq4a\_ d2a17a1 d3sfva1 d3bc1a\_ d2ncda\_ d1sdma\_ d3h4sa1  
d2heha\_ d2grya\_ g3kin.1 d1kk8a2 d1br2a2 d1goja\_ d1f9va\_ d2mysa2  
d1lkxa\_ d3t0qa\_ d4db1a1 d3gbja\_ d1ry6a\_ d1v8ka\_ d1k8ka2 d1k8ka1  
d3uleb1 d3i33a2 d3i33a1 d1bupa1 d1dkgd2 d1dkgd1 d4ci6a2 d1jcfa1  
d4a2ba2 d2fxua1 d1yaga2 d1yaga1 d4cbua2 d1bupa2 d1g99a1 d2e1za2  
d2e1za1 d1saza1 d1saza2 d1lig8a1 d1czan2 d1czan3 d1czan1 d1lig8a2  
d1czan4 d1bg3a4 d1bg3a3 d1bg3a2 d3h3no1 d3h3no2 d3ezwa2 d1hroa\_  
d4gedb\_ d3zooa\_ d1mz4a\_ d1gu2a\_ d1f1fa\_ d1dvva\_ d1c6ra\_ d1c75a\_  
d1e29a\_ d1gdva\_ d1cnoa\_ d1h32b\_ d1co6a\_ d2bh4x\_ d2aiua\_ d5cytr\_  
d1jdl\_ d1i8oa\_ d2zboa\_ d3dmia\_ d1ls9a\_ d1wvec\_ d2yk3a\_ d3ph2b\_  
d1dw0a\_ d5aura\_ d1ql3a\_ d1qn2a\_ d1f1ca\_ d2nqya\_ d1h4ga\_ d1hixa\_  
d1oa2a\_ d1olra\_ d3b7ma\_ d4h7ma1 d3wp3a\_ d2vgda\_ d1ligoa\_ d3zsea\_  
d2nlra\_ d3wx5a\_ d1oa3a\_ d1pvxa\_ d1m4wa\_ d1f5ja\_ d1oa4a\_ d1ks5a\_  
d4ixla1 d4nmwa\_ d1evsa\_ d1cnt1\_ d1pvhb\_ d1z7ca\_ d1huwa\_ d1bgea\_  
d1f6fa\_ d1f45b\_ d1i1rb\_ d1axia\_ d1letea\_ d3tgxb\_ d1scfa\_ d2z3qa1  
d3qbla\_ d1hula\_ d4nkqb\_ d1eera\_ d1v7mv\_ d5e4ea\_ d2o27a\_ d3b5ka\_

d2psma1 d4zf7a\_ d3uf5a\_ d4x51a\_ d1d9ca\_ d4ypgc1 d3oq3a\_ d1lqsl\_  
d1n1fa\_ d1aula\_ d1wu3i\_ d3besl\_ d3ux9a\_ d1v8fa\_ d2ejca\_ d3muea1  
d3q12a1 d3rbaa\_ d2qtra\_ d1nupa\_ d3l92a\_ d1f9aa\_ d1qjca\_ d2h29a\_  
d1vlha\_ d1od6a\_ d1mrza2 d4ruka\_ d2e17a\_ d1iq0a2 d1irxa2 d1r6ta2  
d1ivsa4 d2cyba\_ d1rqga2 d1j09a2 d2yxna\_ d1f7ua2 d1h3fa1 d1ffya3  
d2g36a1 d1jila\_ d1n3la\_ d1i6la\_ d1pfva2 d1h3na3 d3n9ia\_ d3sz3a1  
d3sw2a\_ d1moxc\_ d1dx5i3 d1edmb\_ d1autl2 d1autl1 d1nqlb\_ d1dva11  
d1szba2 d1kigl\_ d2y5f1\_ d1ijqa2 d1gk5a\_ d1g1sa2 d1nt0a3 d1xdtr\_  
d1lmja2 d1lmja1 d1nzia2 d2wphe\_ d1klil\_ d1pfxl2 d1pfxl1 d1p9ja\_  
d1g1ta2 d1f7ea\_ d4yzub\_ d1lr7a1 d2y5ia\_ d1qlsa\_ d1psra\_ d3n22a\_  
d2egda\_ d4ggfc\_ d2wcea\_ d2luca\_ d4aqia\_ d3nsia\_ d2lp3a\_ d1j55a\_  
d1a4pa\_ d1k8ua\_ d1nsha\_ d1pvaa\_ d3fs7a\_ d2pvba\_ d1ttxa\_ d1rwy\_ a\_  
d2kyfa\_ d1rk9a\_ d1a75a\_ d1exra\_ d1tiza1 d1nyaa\_ d1g8ia\_ d1ggwa\_  
d1wdcc\_ d3fwba\_ d1ggza\_ d2o5ga\_ d1ctaa\_ d1m45a\_ d3i5gc\_ d1sl8a\_  
d1fpwa\_ d2scpa\_ d2roaa\_ d4aqra\_ d3pn7b\_ d1br1b\_ d2mysb\_ d1s6ca\_  
d1bjfa\_ d2obha\_ d1jfk\_ a\_ d1jff0a\_ d1qv0a\_ d1lkja\_ d2mlfc\_ d2m97a\_  
d2d8na\_ d4by5a\_ d1jbaa\_ d4nqga\_ d1wdcb\_ d2mysc\_ d1j7qa\_ d1s6ia\_  
d1uhka2 d1r2ua\_ d1dtla\_ d3kf9a\_ d3pn7c\_ d5d67d\_ d1tuza\_ d1h8ba\_  
d1eg3a1 d2zkmx1 d1snla\_ d1gjya\_ d1y1xa\_ d1hqva\_ d1dvia\_ d1qxp\_ a2  
d4usla\_ d1k94a\_ d1wkya2 d1uuqa\_ d3wh9a\_ d4mlra\_ d1xyza\_ d4xuya\_  
d2je8a5 d4bf7a1 d3cuia\_ d1ur4a\_ d1qw9a2 d1odza\_ d2vzsa5 d1bqca\_  
d2x2ya1 d1hjqa\_ d1qnra\_ d4y7ea1 d1vjza\_ d4k68a\_ d2v3ga\_ d4hpga\_  
d1nofa2 d1nq6a\_ d1h4pa\_ d1aq0a\_ d3ziza\_ d4bs0a\_ d1ecea\_ d1h1na\_  
d1ta3b\_ d1w91a2 d1l1wa\_ d1uhva2 d1us3a2 d1egza\_ d7a3ha\_ d1tvna1  
d3nyda1 d1ghsa\_ d2cyga1 d4xv0a\_ d2c8na2 d1w32a\_ d3emca\_ d1v6ya1  
d1foba\_ d2uwfa1 d2fgla\_ d3niya1 d2c0ha1 d1rh9a1 d1yq2a5 d1szna2  
d1fa2a\_ d1pama4 d5do8a1 d1ea9c3 d1hx0a2 d2fhfa5 d1qhoa4 d1avaa2  
d1m53a2 d4m8ua1 d2gjpa2 d1lwha2 d4howa1 d1ktba2 d1j0ha3 d3vm5a1  
d2x1ia\_ d1wzaa2 d1uasa2 d2diea1 d1mxga2 d1ht6a2 d1eswa\_ d1iv8a2  
d5cpsa\_ d1ud2a2 d1zjaa1 d3gbea1 d1kwga2 d1wdpa\_ d1gcya2 d1g5aa2  
d1hvxa2 d3dhpa2 d2bhua3 d4do4a1 d3qgva1 d1e43a2 d1g94a2 d2d3na2  
d1gjwa2 d1gvia3 d1x1na1 d1r7aa2 d1tz7a1 d2x42a1 d1tr9a1 d3abza1  
d4toqa\_ d1wb0a1 d1w9pa1 d1eoka\_ d1litxa1 d1kfwa1 d1goia2 d1ledqa2  
d2gsja\_ d1hjxa1 d1jnda1 d1vf8a1 d3wdpp1 d3wq5a\_ d4gxpa\_ d4hz8a\_  
d1e4mm\_ d3aiua\_ d1wcca1 d1qvba\_ d3ahxa\_ d1v02a\_ d2dgaa\_ d1pbga\_  
d1vffa1 d1qoxa\_ d4ha4a\_ d2y8ga\_ d1xkea1 d2y8fa\_ d2v76a\_ d1wj1a1  
d1aqca\_ d1qqga2 d1qqga1 d1n3ha\_ d4dbba\_ d3f0wa1 d1p3ra\_ d1wgua1  
d2cy4a1 d3hqca\_ d1wvha1 d1xr0b1 d1wgqa1 d1v89a1 d2coda1 d1zc3b\_  
d1wg7a1 d1u5ea1 d1v61a1 d2coca1 d2ys1a1 d1v5pa1 d1ntya2 d1wjma1  
d1wila1 d1u29a\_ d1xx0a1 d1unqa\_ d2zkmx3 d1fhoa\_ d1v88a1 d2adza1  
d1x1fa1 d1p6sa\_ d2coaa1 d1btka\_ d1v5ma1 d1faoa\_ d2x18a\_ d1dyna\_  
d1x1ga1 d4kaxb\_ d2j59m1 d1ki1b2 d1xcga2 d1txda2 d1u5da1 d1dbha2  
d1wlha\_ d1upqa\_ d1v5ua1 d1foea2 d2fjla1 d1eaza\_ d2dfka2 d2cofa1  
d1kz7a2 d1h6ta1 d9ldta1 d2ewda3 d1up7a1 d2dfda1 d1s6ya1 d1vjta1

d7mdha1 d1hyea1 d1t2da1 d1ojsa3 d1b8pa1 d1ldna1 d1hyha1 d1civa1  
d2a92a1 d1ez4a1 d1i0za1 d1y6ja1 d1gv0a1 d1ur5a1 d1lllda1 d1lobba1  
d1npya1 d3t4ea2 d1a4ia1 d1o0sa1 d2hk9a2 d2egga2 d1b26a1 d1bvua1  
d1gq2a1 d1c1da1 d1leha1 d1gtma1 d1euzal d1nvtal d3dona2 d1ledza1  
d1gpja2 d1vi2a1 d1p77a1 d1nyta1 d1b0aa1 d1vl6a1 d1v9la1 d1txga2  
d3f47a1 d1mv8a2 d2pv7a2 d1xc2a3 d2ahra2 d4xiya1 d2f1ka2 d1pgja2  
d1i36a2 d1np3a2 d1lj8a4 d1teaa3 d1qmg2 d2i76a2 d2g5ca2 d1wdka3  
d1dlja2 d3cuma3 d1kola2 d1f8fa2 d1qora2 d1jqba2 d1vj0a2 d1cdoa2  
d1gu7a2 d1d1ta2 d1xa0a2 d2dm6a2 d1rjwa2 d1llua2 d1h2ba2 d1tt7a2  
d1piwa2 d1o89a2 d1iz0a2 d1e3ja2 d1yb5a2 d1uufa2 d1vj1a2 d1e3ia2  
d3gpdg1 d1vc2a1 d2nvwa1 d1u8fo1 d1ydwal d1hdgo1 d2g17a1 d1cf2o1  
d2czca2 d1r0ka2 d1obfo1 d2cvoa1 d1ebfa1 d1h6da1 d1i32a1 d1zh8a1  
d2q49a1 d1qkia1 d1j5pa4 d3pzra1 d1xeea1 d1vkoa1 d1vm6a3 d3qvsal  
d2pkqo1 d1b7go1 d1gr0a1 d1p1ja1 d1lc0a1 d1j0xo1 d3pwka1 d2hjsa1  
d1zyao1 d1vkna1 d1t1ta1 d1nvmb1 d3sjua\_ d3ojfa1 d1xu9a1 d2jjya1  
d1n7ha\_ d1y1pa1 d1h5qa\_ d1jtva\_ d4fs3a\_ d2bkaa1 d1gy8a\_ d2c5aa1  
d1ulsa\_ d1o0ea\_ d2b69a1 d1y5ma1 d1spxa\_ d1aela\_ d1bxka\_ d1ydea1  
d1gega\_ d1hdoa\_ d1o5ia\_ d1e6ua\_ d1snya1 d2rhca\_ d3zv4a\_ d5ceja\_  
d2d1ya1 d1fjha\_ d3w8ea\_ d2fmua1 d1x1ta\_ d1rpna\_ d3ay7a1 d1k2wa\_  
d1eq2a\_ d2hrba1 d3ruaa\_ d2ew8a1 d4hwka\_ d1xgka\_ d2bd0a1 d1yo6a1  
d2a35a1 d2ntva\_ d1vl8a\_ d1hdca\_ d4bkua\_ d2ag5a1 d2q45a\_ d1nffa\_  
d4iy1a\_ d1zbqa1 d1kewa\_ d1ek6a\_ d1ja9a\_ d2q46a2 d1iy8a\_ d1cyda\_  
d2ptga\_ d1hxha\_ d1uzma1 d3lyla\_ d4m89a\_ d3wyea\_ d2b1la1 d1w6ua\_  
d1sb8a\_ d2q2va\_ d4nr0a\_ d1e6wa\_ d2gasa\_ d3oiga1 d2bgka1 d1mxha\_  
d1vl0a1 d1rkxa\_ d1r6da\_ d1wmaa1 d1e7wa\_ d2c07a1 d1xkqa\_ d3tzha\_  
d1g0oa\_ d3lz6a\_ d1qyca\_ d1ledoa\_ d1gz6a\_ d1oc2a\_ d1t2aa\_ d1zema1  
d2xoxa\_ d1z45a2 d1geea\_ d1p33a\_ d3lt0a\_ d4e6pa\_ d2wyua\_ d1db3a\_  
d4q9na\_ d1xhla\_ d4o1ma\_ d1fmca\_ d2uvda\_ d2gdza1 d1uaya\_ d2z1ma\_  
d2o23a2 d2fr1a2 d2fr1a1 d1qsga\_ d1qyda\_ d4zjua\_ d2a4ka1 d1yb1a\_  
d1wvga1 d1yxma1 d3f4ba\_ d1mg5a\_ d1xg5a1 d1r55a1 d3gboa\_ d1atla\_  
d1kufa\_ d4q1la\_ d1quaa\_ d1yp1a\_ d1wnia\_ d3nqyb\_ d4gera\_ d1xd3a\_  
d3ifwa\_ d1ex0a4 d1g0da4 d2f4ma1 d1x3za\_ d1mdwa\_ d1qxp4 d1ziva1  
d1zcmal d1t3ca\_ d2a97a\_ d3f1ea\_ g1e1h.1 d3ioqa\_ d1fh0a\_ d1o0ea\_  
d1khqa\_ d1m6da\_ d2cb5a\_ d1cs8a\_ g8pch.1 d1s4va\_ d2pnsa\_ d1vsna1  
d1mira\_ d1iwda\_ d2oula\_ d7pcka\_ d3bwka\_ d3bcna\_ d2p86a\_ d1pvja\_  
d1pcia\_ d1gece\_ d1deua\_ d4bs6a\_ d1xkga1 d1cqda\_ d1jqpa2 d2c0ya\_  
d2bdza\_ d3p5ua\_ d1ex4a2 d1c6va\_ d2jk6a2 d2jk6a1 d1feca1 d1feca2  
d1lpfa1 d1lpfa2 d1xhca1 d1xhca2 d1dxla2 d1dxla1 d1gera2 d1m6ia2  
d1onfa1 d1onfa2 d3lada2 d3lada1 d1w4xa1 d1w4xa2 d1gesa2 d1mo9a1  
d1xdia1 d1fl2a2 d1fl2a1 d1fcda1 d1fcda2 d1h6va2 d1h6va1 d1mo9a2  
d1gv4a2 d1gv4a1 d2gv8a2 d2gv8a1 d1aoga1 d1aoga2 d1hyua1 d1ebda1  
d1ebda2 d3dk9a1 d1q1ra2 d1q1ra1 d1gesa1 d1zbfa1 d2z1ha\_ d2etja1  
d3qioa1 d1j11a\_ d2e41a\_ d1j12a\_ d2lsna1 d1io2a\_ d1uaxa\_ d2yv0x\_  
d1mu2a1 d1ekea\_ d1i39a\_ d1o94a2 d1lqta1 d1cjca1 d1pn0a1 d1reoa1

d1ju2a1 d2f5va1 d3c96a1 d2gmha1 d1pj5a2 d1gpea1 d1o5wa1 d1n4wa1  
d1k0ia1 d2dw4a2 d2ivda1 d1seza1 d2voua1 d1kdga1 d1s5ja1 d2hbja2  
d2igia\_ d1wlja\_ d1qhta1 d4dlea1 d1tgoa1 d2f96a1 d3tr8a1 d3mxma\_  
d1q8ia1 d1y97a1 d1w0ha\_ d1kfsa1 d2py5a1 d1noya\_ d1d5aa1 d1yt3a3  
d2guia\_ d3mwpal d4kb1a\_ d1js9c\_ d1f15b\_ d1za7a\_ d1laja\_ glapy.1  
d3ljqa\_ d4qmea2 d2xdta2 d1z5ha2 d3nvva1 d1krha3 d2h88b1 d1n62a2  
d1t3qa2 d1zoyb1 d1jq4a\_ d1ffva2 d1dgja2 d1rm6c2 d1jmx2 d1jmx1  
d1pbya2 d1r7ha\_ d1faaa\_ d1wika1 d1xfla\_ d1ttza1 d2f51a1 d1ti3a\_  
d1nhoa\_ d1sena\_ d2i4aa\_ d1ep7a\_ d1zmaa1 d1fo5a\_ d3lefa1 d3diea1  
d2yana1 d1z6na1 d1oaza\_ d3zywa1 d4aj8a\_ d1nm3a1 d4fiwa\_ d1wmja\_  
d4hs1a1 d1liloa\_ d1xwaa1 d1wjka1 d2vm1a\_ d1fb6a\_ d1gh2a\_ d1h75a\_  
d1nw2a\_ d1kx5b\_ d3a6na\_ d4m6ba2 d2nqbd\_ d3wkjd\_ d2yfwe\_ d4h9na\_  
d5bnxa\_ d1kx5c\_ d3r45a\_ d1eqzb\_ d4jjnb\_ d1f66c\_ d1eqza\_ d4wnnb\_  
d1kx5a\_ d1u35c1 d1id3a\_ d2nqbc\_ d1kx5d\_ d3us3a3 d3us3a1 d1um8a\_  
d1ixza\_ d1qvra2 d1qvra3 d1qzma\_ d1sxjc2 d1jr3d2 d2p65a\_ d1l8qa2  
d1g8pa\_ d3hu3a3 d1sxjd2 d1njfa\_ d1sxja2 d1tuea1 d2ce7a2 d1w5sa2  
d1sxjb2 d1d2na\_ d1ny5a2 d1ofha\_ d2gnoa2 d2a5yb3 d1fnna2 d1u0ja1  
d1lv7a\_ d1iqpa2 d2fnna2 d1ixsb2 d4gita\_ d1sxje2 d1g41a\_ d1pd212  
d1nhya2 d2a2ra2 d1k0dd2 d1f2ea2 d1gsua2 d1f3ba2 d2fhea2 d2pvqa1  
d1tw9a2 d1oyja2 d1e6ba2 d1k0ma2 d3ik7a1 d4is0a1 d1r5aa2 d1jlva2  
d1m0ua2 d3gtub2 d1z9ha2 d1okta2 d1axda2 d2gsra2 d1tu7a2 d1k3ya2  
d1zgma1 d1b48a2 d1gnwa2 d1gwca2 d2gsta2 d1glqa2 d1oe8a2 d1pn9a2  
d1v2aa2 d1fw1a2 d1duga2 d3vrda1 d3vrda2 d1fcdc2 d1fcdc1 d1h1oa2  
d1h1oa1 d1m70a2 d1qusa\_ d1qqya\_ d1gd6a\_ d1f6ra\_ d2gv0a\_ d1iiza\_  
d2z2fa\_ d1j8xa\_ d1ghla\_ d1b9oa\_ d1iyka2 d1iyka1 d1rxta1 d1iica2  
d2pjsa1 d1k1la\_ d2i7ra1 d1ecsa\_ d1xqaa1 d5cj3a1 d1npba\_ d1jifa\_  
d2p7oa\_ d1r9ca\_ d1mpya2 d1kw3b2 d1kw3b1 d4ghga1 d1tfza1 d3isqa1  
d3isqa2 d1sqia1 d1sqia2 d1lkda2 d1lkda1 d1mpya1 d1cjxa1 d1sp9b2  
d1t47a1 d1t47a2 d1f1ua2 d1sp8a1 d1sp8a2 d1f1ua1 d4iuaa3 d4bvva\_  
d5hpga\_ d3k65a\_ d1ki0a3 d1ki0a2 d1ki0a1 d1a0ha1 d1pmla\_ d3sp8a3  
d2feba1 d1qsta\_ d2beia1 d4m3sa\_ d1u6ma1 d1ygha\_ d1yk3a1 d3dr6a\_  
d1xmta\_ d1z4ea1 d2ge3a1 d1bo4a\_ d2fiaa1 d2jdca1 d1y9wa1 d3to7a\_  
d1wwza1 d2f14a1 d2ozua1 d2b5ga\_ d2cy2a1 d2p0wa\_ d1cm0a\_ d4pswa\_  
d1yrea1 d1yr0a1 d1m4ia\_ d2gana1 d1yvka1 d1ghea\_ d2g3aa1 d1y7ra1  
d2eua1 d1q2ya\_ d2fsra1 d1xeba\_ d2ae6a1 d1cjwa\_ d1qsma\_ d2aj6a1  
d1y9ka1 d1i12a\_ d1vkca\_ d2atra1 d1n71a\_ d2d4pa1 d2fiwa1 d2fe7a1  
d1tiqa1 d2ou2a\_ d1yx0a1 d2fcka1 d1p0ha\_ d2j8ma\_ d2pq8a\_ d1z4ra1  
d1s3za1 d1ufha\_ d1xvqa1 d1pn0a2 d3hy2a\_ d2cvba1 d1o8xa\_ d1lu4a\_  
d1we0a1 d2bmx1 d2a4va1 d1psqa\_ d1xiya1 d1q98a\_ d1n8ja\_ d1zofa1  
d2ggta\_ d3tjja\_ d4je1a1 d1o73a\_ d3s9fa\_ d2zcta\_ d1qmva\_ d1jfua\_  
d2b1ka\_ d5dvba1 d2b5xa1 d2v2ga\_ d1st9a\_ d3tb2a\_ d41lra\_ d4fh8a1  
d1e2ya\_ d1knga\_ d2h30a\_ d1i5ga\_ d2z9sa\_ d2f8aa1 d1tp9a1 d2b7ka\_  
d1nm3a2 d3hvva\_ d2wfca1 d4kcea\_ d1xvwa1 d4gqca1 d3qpma\_ d4k1fa\_  
d1zsoa1 d1gp1a\_ d1prxa\_ d2m5ta\_ d1cqqa\_ d1wqsa\_ d5bpea\_ d2ipha\_

d1lvoa\_ d2bhga1 d3tnta\_ d3sjia\_ d3d23a1 d2fyqa\_ d3tloa\_ d3zvea1  
d2hrva\_ d3q3ya1 d4asha1 d1e88a1 d1l6ja5 d1l6ja4 d1leaka4 d1leaka3  
d1l6ja3 d1h8pa2 d1h8pa1 d1etha2 d1w52x1 d2ppla1 d1hpla2 d1lpbb2  
d2oxea1 d1bu8a2 d1rpla2 d1lgya\_ d4l3wa\_ d1llfa\_ d1gz7a\_ d1lukca\_  
d3ia2a\_ d1a88a\_ d4dgqa1 d1hkha\_ d1zoia\_ d3zxha\_ d1cgl\_a\_ d1rm8a\_  
d1leaka2 d1hy7a\_ d2jsda\_ d1cxva\_ d1hv5a\_ d1i76a\_ d3p0ya1 d1lgra2  
d1n8yc2 d1n8yc1 d1m6ba2 d1m6ba1 d1sr9a2 d1rqba2 d1cixa\_ d1y29a\_  
d1v7fa\_ d2jtba\_ d1d1ha\_ d1g9pa\_ d1lupa\_ d1qk7a\_ d1mb6a\_ d2a2va\_  
d1niya\_ d1i25a\_ d1hvwa\_ d2mpqa\_ d1ie6a\_ d1kqha\_ d1la4a\_ d2mxoa1  
d1d10a\_ d1koza\_ d1qk6a\_ d1emxa\_ d1lqra\_ d1c6wa\_ d1rmka\_ d1ixta\_  
d1eyoa\_ d1cnna\_ d1fu3a\_ d1g1pa\_ d1f3ka\_ d1fyga\_ d1rypd\_ d1lirua\_  
d1rypc\_ d3unfk\_ d1rypa\_ d1j2pa\_ d1lirui\_ d1j2qh\_ d3unfh\_ d1m4ya\_  
d1rypb\_ d1lirul\_ d1lirug\_ d1liru2\_ d1q5rh\_ d1rypg\_ d1g3ka\_ d1liruf\_  
d1q5qa\_ d1lirub\_ d1lryph\_ d3ty6a\_ d1liruj\_ d1liruk\_ d1rype\_ d1lirud\_  
d1lirue\_ d3mi01\_ d1rypf\_ d1liruh\_ d2z3ba\_ d1liruc\_ d3mka2\_ d1liru1\_  
d1ny721 d1ny722 d1a6ca3 d1a6ca2 d1a6ca1 d1pgl21 d1pgl11 d1ny711  
d1mqta\_ d1d4m3\_ d1fmd3\_ d2mev1\_ glaym.1 d1ev13\_ d4q4w1\_ d1rla3\_  
d2x5ia\_ d1rhi1\_ glr1a.1 gl1d4m.1 glrhi.1 d1b35b\_ d1loopa\_ d1tme1\_  
d4iv1a\_ glpvc.1 glfpn.1 d1fpn1\_ d4gb31\_ d1d4m1\_ d1fmd1\_ d1ev11\_  
d2wzr3\_ d1qqp3\_ glfmd.1 d2x5ic\_ d1rhi3\_ glloop.1 d1hxs1\_ glhxs.1  
d1fpn3\_ d1bev1\_ g2mev.1 d1eah3\_ d1aym1\_ d1pvc3\_ d1qqp1\_ d1zba3\_  
d1h8ta\_ d3vbhc\_ glb35.1 glbev.1 d1hxs3\_ gllev1.1 d1bev3\_ gltmf.1  
d1tmf1\_ d1b35a\_ d2mev3\_ gl Leah.1 glh8t.1 d1eah1\_ d4q4w3\_ d1rla1\_  
d1aym3\_ d1pvc1\_ d1zba1\_ d1h8tc\_ d1loopc\_ d1tme3\_ glqqp.1 d4iv1c\_  
gl1tme.1 d3ubub\_ d1legia\_ d1qo3c\_ d1v7pa\_ d1tdqb\_ d3ubua\_ d1c3ab\_  
d1h8ua\_ d3bx4b\_ d1t8ca1 d1sb2a1 d1qdda\_ d2ziba1 d3cada\_ d1byfa\_  
d1j34b\_ d1jwia\_ d1jzna\_ d1c3aa\_ d1oz7b\_ d1wmza\_ d3bdwb\_ d1hq8a\_  
d1fifa1 d1dv8a\_ d3hupa\_ d1wk1a1 d1umra\_ d2afpa\_ d3bx4a\_ d1gz2a\_  
d1s16a\_ d1v7pb\_ d3g8ka\_ d1ixxa\_ d1j34a\_ d1jwib\_ d1g1sa1 d1y17a1  
d1ja3a\_ d1fvub\_ d3bdwa\_ d1sb2b1 d1fvua\_ d1umrc\_ d1oz7a\_ d4m17a\_  
d3cfwa1 d1ypqa1 d1g1ta1 d3fd4a\_ d3l9jc\_ d4dn8a1 d1v41b\_ d1rd11\_  
d2msba\_ d1eixa\_ d3extra\_ d2ffca1 d2fdsa1 d3n3ma1 d2czda\_ d2yyua\_  
d1vqta1 d1dbta\_ d3ldva1 d4lt9a1 d3tc7a1 d3hoja\_ d1i4na\_ d3vnda\_  
d3n18a1 d1geqa\_ d3naval d1v5xa\_ d4a2ra1 d3tc6a1 d1ujpa\_ d4ijba\_  
d1xcfa\_ d1vc4a\_ d1rd5a\_ d1qopa\_ d3b5va\_ d2r80b\_ d1cqxa1 d1cg5a\_  
d1gcvb\_ d3boma\_ d2h8fb\_ d2raoa\_ d3bj1a\_ d4hrrb\_ d2r50a\_ d3d1kb\_  
d2aa1b1 d3zhwa\_ d3hf4b\_ d3gdja\_ d1jebb\_ d3bj1b\_ d1x9fb\_ d1wmub\_  
d1gcv\_a\_ d3bcqb\_ d3d4xb\_ d2dc3a\_ d3hf4a\_ d4yu3a\_ d3k8ba\_ d1qpwb\_  
d2r80a\_ d3bcqa\_ d1v4wa\_ d3wtgb\_ d1jl7a\_ d4esaa\_ d1a9we\_ d3d1ab\_  
d1fsla\_ d4h21a\_ d1v4wb\_ d1mwca\_ d1vhba\_ d1jeba\_ d1spgb\_ d1h97a\_  
d1q1fa\_ d1tu9a1 d3d1aa\_ d1hdsb\_ d3hyub\_ d2zfbb\_ d3fs4a\_ d1oj6a\_  
d1shrb\_ d4h21b\_ d4yu3b\_ d1spga\_ d3hrwa\_ d3qqra\_ d3at5a\_ d4wchd\_  
d3hyua\_ d1cg5b\_ d1uc3a\_ d1hbra\_ d2raob\_ d1outb\_ d4esab\_ d3gdjb\_  
d3qqqa\_ d1x9fc\_ d3vrfa\_ d1litha\_ d3mkba\_ d3d4xa\_ d3mjpa\_ d1jl6a\_

d3fh9a\_ dlouta\_ d2dc3b\_ dlit2a\_ d3eoka\_ d3g46a\_ dlqpwa\_ d3vrfb\_  
d1ch4a\_ dlx9fd\_ dlhdsa\_ d2zfba\_ d3mkbb\_ dlora4a\_ d3wtga\_ dla4fa\_  
d3fh9b\_ d3bomb\_ d3cy5a\_ d3at5b\_ dlx9fa\_ d2oifa\_ d4lmb\_ d1cpcb\_  
d3v57a\_ dlkn1a\_ dlcpca\_ d4f0ta\_ d2vjha\_ d4po5b\_ dleyxa\_ dlalla\_  
d4f0tb\_ dlb33b\_ dlb8db\_ d4h0mb\_ d2vjhb\_ d4lm6b\_ d2vmlb\_ dlallb\_  
d2vjta\_ d3dbja\_ d2vmla\_ d2vjtb\_ d4f0ub\_ dl1f99b\_ d4rmpa1\_ dl1iaa\_  
dleyxb\_ d2uulb\_ d4lmsb\_ d4f0ua\_ d2bv8a\_ dl1f99a\_ d2bv8b\_ d2c71b\_  
d3dbjb\_ d4rmpb1\_ dl1b8da\_ d4h0ma\_ d3v57b\_ dlkn1b\_ dl1iab\_ d2uula\_  
d2j96a\_ dlkyqa1\_ d3w3ea\_ d4tx7a\_ d3cq1a\_ d4msta\_ d3iwra\_ d2z37a\_  
d4dyga\_ dlhlga\_ d2xqfa\_ d1ea5a\_ dl1dx4a\_ dl1qe3a\_ dl1k4ya\_ d4qwwa\_  
d2ha2a\_ d3c8da2\_ d2pbla1\_ dl1jkma\_ dl1jjia\_ dl1lzla\_ dl1jjfa\_ dl1b9ra\_  
dl1offa\_ dl1frra\_ d3wcqa\_ d1e9ma\_ dl115pa\_ dl1wria\_ dl1i7ha\_ d3av8a\_  
dl1czpa\_ dl1rfka\_ d3plma1\_ d3b2ga\_ d2bt6a2\_ dl1pv8a\_ dl1w5qa\_ d2c1ha\_  
dl1ohla\_ dl1l6sa\_ dl1f74a\_ d3l21a\_ d2e1da\_ dl1to3a1\_ dl1w3ia\_ dl1sfla\_  
dl1n7ka\_ dl1vcva1\_ d4imea\_ dl1wa3a\_ d2ocza1\_ dl1f2ja\_ d3m16a\_ d2yxga\_  
dl1ub3a\_ d3a5fa\_ dl1fbaa\_ dl1l6wa\_ dl1xfba1\_ dl1wx0a1\_ dl1vpxa1\_ dl1mxsa\_  
d2a4aa1\_ dl1xkya1\_ d3cq0a1\_ d3s1xa\_ dl1f05a\_ dl1fdja\_ d3cp1a1\_ d4d2ja\_  
d4mh8a\_ dl1mu2a2\_ d4i7ga1\_ d3rp2a\_ glucy.1\_ dl1fuja\_ d2zchp\_ d3w94a\_  
dl1si5h\_ dl1lo6a\_ g2pka.1\_ dl1cgha\_ dl1kigh\_ dl1a5ia\_ d3s9ba\_ dl1hj8a\_  
dl1ao5a\_ d2anya\_ dl1q3xa1\_ dl1gvza\_ dl1azza\_ d4gsoa\_ d2f91a1\_ dl1iaua\_  
dl1gdna\_ dl1eufa\_ gl1fiw.1\_ dl1eq9a\_ d4nfea\_ d2rdla\_ dl1spja\_ dl1elval  
dl1a7sa\_ dl1ekbb\_ dl1pfxc\_ dl1yc0a\_ d2aiqa\_ dl1fi8a\_ d4k60a\_ d4dgja\_  
dl1mzaa\_ dl1op0a\_ d3tjva\_ dl1pytd\_ dl1sgfg\_ gl1gg6.1\_ d2eeka\_ gl1rtf.1  
dl1a0ja\_ d3g01a\_ dl1pytc\_ d4e7na\_ dl1ddja\_ dl1z8ga1\_ d2hlca\_ dl1npma\_  
dl1brup\_ gl1jou.1\_ dl1sgfa\_ dl1autc\_ g2hnt.1\_ gl1kdq.1\_ dl1orfa\_ d3s69a\_  
d4crga\_ dl1fxya\_ dl1bqya\_ dl1ra6a\_ dl1muka\_ d3gsza\_ dl1te9a\_ d2xwha\_  
d3uqsa\_ d3hkwa\_ d3n6ma\_ d2cjqa\_ d2xyma\_ dl1teba\_ dl1te8a\_ dl1s48a\_  
dl1u09a1\_ d4wfxa\_ d3tyqa\_ d2pgga1\_ dl1m4la\_ d2bk7a\_ d3fjua\_ dl1z5ra1  
dl1kwma1\_ dl1jqga1\_ d2c1ca1\_ dl1dtda\_ dl1h8la2\_ d3l1gia\_ d3i77a\_ d2z9ia2  
d4nsva\_ dl1lcya2\_ d4jcna\_ dl1agja\_ dl1os8a\_ dl1hpga\_ dl1p3ca\_ dl1l1ja\_  
dl1qtfa\_ dl1e69a\_ dl1mv5a\_ d3g60a4\_ gl1ii8.1\_ dl1ewqa2\_ dl1ji0a\_ dl1v43a3  
d2wmfa1\_ dl1vpla\_ dl1g2912\_ d4a82a2\_ gl1f2t.1\_ d2d62a1\_ d3tuic1\_ d2bbsa1  
d3g60a3\_ d2ixea\_ dl1g6ha\_ dl1sgwa1\_ d2qi9c\_ d3rlfa1\_ d3b60a1\_ d3d31a2  
d2pzea1\_ gl1xew.1\_ dl1jj7a\_ dl1oxk2\_ d2onka1\_ dl1wlwa\_ dl1iwea\_ dl1qf5a\_  
dl1vmaa2\_ dl1nija1\_ dl1np6a\_ d2p67a1\_ d3ihla\_ dl1okkd2\_ dl1ls1a2\_ dl1s1ma2  
dl1iona\_ d2v40a\_ dl1dj3a\_ d3hida\_ d2vola1\_ d2g0ta1\_ dl1vcoa2\_ dl1j8mf2  
dl1g3qa\_ dl1xjca\_ dl1p9ba\_ dl1qzxa3\_ dl1ihua2\_ dl1ihua1\_ d2qm8a\_ dl1dj2a\_  
d4ioja\_ dl1cp2a\_ dl1yrba2\_ d3gqba2\_ dl1xp8a1\_ dl1tf7a2\_ dl1tf7a1\_ dl1ye8a1  
dl1skyb3\_ d2qe7d2\_ d4blta\_ d4huta\_ d3l1daa2\_ d4hyya\_ d2i3ba1\_ dl1crla\_  
d3j9tb2\_ d3ntua2\_ dl1vdza1\_ d2z43a\_ dl1e9ra\_ dl1nlfa\_ d3ziaa2\_ dl1n0wa\_  
dl1g6oa\_ d3ziad2\_ d3j9ta2\_ dl1pzna2\_ d3gqbb2\_ d2i49a\_ dl1nnfa\_ dl1xvxa\_  
dl1ursa\_ dl1h3da1\_ dl1iuda\_ d4m1va1\_ dl1twya\_ d3e13x\_ d2nxoa1\_ d4pfua\_  
d3ttma\_ dl1elja\_ d2qmwa1\_ dl1us5a\_ dl1y3na1\_ dl1jeta\_ dl1uqwa\_ d4f19a1  
d2esna2\_ d3thia\_ d3fasa1\_ d2uyeb\_ d2xwva1\_ dl1r9la\_ d2fyia1\_ dl1pb7a\_

d2ozza1 d1sw5a\_ d1nh8a1 d1vr5a1 d2g29a\_ d1xs5a\_ d3lswa\_ d2z23a\_  
d3w9va\_ d3tcha\_ d1q35a\_ d1z7me1 d3q27a\_ d1p99a\_ d1ve4a1 d2i6ea1  
d4mcoa1 d4n8ya\_ d1eu8a\_ d1zbma1 d1hsla\_ d1ixca2 d1j1na\_ d1xvya\_  
d1y9ua\_ d2z22a1 d1xoca1 d4oera\_ d1wdna\_ d5f1qa1 d1xt8a1 d4gwoa\_  
d4igta1 d1pc3a\_ d4mmpa1 d1o63a\_ d2cz1a1 d2onsa2 d4mija1 d1eh3a\_  
d3skpa\_ d1dtza1 d1dtza2 d1ieja\_ d1jnfa2 d1ce2a1 d1jnfa1 d1b1xa2  
d1b1xa1 d1jw1a1 d1jw1a2 d1ryoa\_ d1h76a1 d1h76a2 d3q3ma\_ d1za0a1  
d1mxra\_ d2inca\_ d1jk0a\_ d2incb\_ d1mhyb\_ d3hf1b\_ d1mtyb\_ d1r2fa\_  
d2uw1a\_ d1mhyd\_ d3n37a\_ d1afra\_ d1oquc\_ d1syya\_ d1mtyd\_ d2o1za\_  
d1uzra\_ d1smsa\_ d2fkza\_ d1zujal d1s3qa1 d2fjca1 d1z6om1 d1veia\_  
d4dyya\_ d1jiga\_ d3gvya\_ d2pyba\_ d4cy9a1 d3bvfa1 d1r03a\_ d2cf7a\_  
d1nf4a\_ d1zs3a1 d4iwka\_ d3ka8a\_ d3np0x\_ d1n1qa\_ d1lb3a\_ d4e6ka\_  
d1z6oa1 d2fzfa1 d4dyua\_ d3ge4a\_ d1jgca\_ d4am4a\_ d2z6ma\_ d1ji5a\_  
d1vlga\_ d1lkoa1 d1krqa\_ d3qz3a\_ d1o9ra\_ d2ffxj\_ d1euma\_ d1yv1a1  
d2v2pa\_ d1j30a\_ d4di0a\_ d1zx5a1 d1oewa\_ d2qzxa\_ d2asia\_ d1psoe\_  
d1miqa\_ d1smra\_ d2h6ta\_ d1pfza\_ d1lizda\_ d3hd8a\_ d1j71a\_ d1dpja\_  
d4aa9a\_ d1t6ex\_ g1b5f.1 g1lya.1 g1htr.1 d1qdma2 d1bxoa\_ d1wkra\_  
d1tzsa\_ d1libqa\_ d2qzwa\_ d1zoyal d1d4ca2 d1chua2 d1jnra2 d1kf6a2  
d1bdqa\_ d3ggta\_ d3ixoa\_ d1mrxa\_ d2haha\_ d1tw7a\_ d4njsa\_ d1sgua\_  
d2p3da\_ d1nsoa\_ d3d3ta\_ d2rkfa\_ d1c6ya\_ d2rspa\_ d3ogpa\_ d3ekwa\_  
d2o4na\_ d2j9ja\_ d1baia\_ d3ggua\_ d3lzua\_ d4npua\_ d4j55a\_ d2r8na\_  
d2fxda\_ d2p3ca\_ d4dqea\_ d3ttpa\_ d3t3ca\_ d2p3aa\_ d2hc0a\_ d2fdda\_  
d3mwsa\_ d1k8rb\_ d1wgra1 d1ef5a\_ d1wfyal d1e8ya3 d1wgyal d1lfda\_  
d2cs4a1 d1wxma1 d2byeal d3kh0a1 d2byfa1 d1wxaa1 d1e7ua3 d1h4ra3  
d4yl8a1 d2a16a3 d1wgda1 d1wgga1 d4q5eb\_ d1wjna1 d1se9a\_ d3n3kb\_  
d1wz0a1 d1we6a1 d2m0xa\_ d2gbka\_ d3rt3b1 d1wh3a1 d1sifa\_ d2ekek2  
d4ii2b1 d4hk2a1 d1c3ta\_ d1m94a\_ d1wgha1 d1ttna1 d1j8ca\_ d1wx8a1  
d3v6cb1 d2ma9b\_ d4i6lb1 d1bt0a\_ d2jvca1 d1iyfa\_ d2k1fa\_ d1wxva1  
d1wf9a1 d1t0ya\_ d2io0b2 d1x1ma1 d2gbma\_ d1zw7a1 d2m17a\_ d1ud7a\_  
d1we7a1 d2lwpa\_ d2gbja\_ d1wjua1 d1v6ea1 d1v86a1 d4eewa\_ d1wiaa1  
d4icva\_ d4gu2a\_ d1wx7a1 d1wy8a1 d4hjka1 d2faza1 d1v5oa1 d2h0ba\_  
d2erfa\_ d1h30a1 d3mw4a1 d1pz7a\_ d2r1ba\_ d3v64a1 d1d2sa\_ d3bopa1  
d3mw3a1 d1okqa1 d1okqa2 d2bcgg1 d2bcgg2 d1d5ta1 d1dszb\_ d1a6ya\_  
d3cbba\_ d1ynwa1 d1r4ia\_ d1hcqa\_ d2hana\_ d2hanb\_ d2enva1 d1kb4b\_  
d2n1lb\_ d1lo1a\_ d1cita\_ d1adqa1 d1fnga1 d1uvqb1 d1zs8a1 d2vola1  
d2vola2 d1mfb12 d2jelh2 d1uwel2 d3qq4b1 d1kjvb\_ d1k5na1 d1osph2  
d4odh12 d1ow0a1 d1ow0a2 d1bfob2 d3l9ra2 d3jtth1 d2fath2 d4elkb2  
d1fn4b2 d2xfxb\_ d1pg7x2 d1cqka\_ d4k71b2 d1lk2a1 d1eapb2 d4lfhg2  
d1i4fa1 d2nw2a2 d1kfah2 d1mhca1 d1h3ua1 d1wejh2 d1h0db2 d1a5fh2  
d1kcvh2 d1mjuh2 d1qqda1 d1kcrh2 d1k8ia1 d3huja2 d2nnab1 d1nfd2  
d3mffb2 d1s9va1 d1lk3h2 d1q0x12 d1fv1b1 d1neza1 d4rfeb2 d1r3ha1  
d1a6tb2 d1kjva1 d1pz5b2 d1onqa1 d2bc4a2 d1de4a1 d1k8da1 d1tcra2  
d1dn0b2 d1nfde2 d2xwtb2 d1bfoa2 d1mexh2 d1iakb1 d1ypzf2 d4f7ea2  
d1q7212 d2fbjh2 d1clzh2 d1fngb1 d1uvqa1 d1vgka1 d1c16a1 d4j12a2



d4x99b2 d1igtb3 d1je6a1 d1q72h2 d1nldh2 d1teth2 d2hmic2 d1ilca2  
d1ilca1 d1k8ib1 d1q0yh2 d1kfa12 d3frua1 d1pg7w2 d1u58a1 d1igyb4  
d1igyb3 d1hyrc1 d1klub1 d1deeb2 d1c12b2 d2bc4b2 d2ig2h2 d1kcv12  
d3wn5b1 d11k2b\_ d11k312 d1mjul2 d1sm3h2 d1q0xh2 d1zvsal d1ydpal  
d1u8ib2 d1ypze2 d1kcuh2 d21j7a\_ d1n4na\_ d2m8bb1 d2kyqa\_ d3psma\_  
d1jkza\_ d1jxca\_ d2g11a\_ d1ugla\_ d4uj0a\_ d2k4ua\_ d1hp2a\_ d2lu9a\_  
d1baha\_ d2meoa1 d1wm7a\_ d1n8ma\_ d1jlza\_ d1wpda\_ d1c55a\_ d1pvza\_  
d1wt7a\_ d1rjia\_ d1wz5a\_ d1m2sa\_ d1pjva\_ d1c49a\_ d1qkya\_ d2ktca1  
d1wmta\_ d1du9a\_ d1j5ja\_ d1rlga\_ d1t0za\_ d2i61a\_ d1t1ta\_ d1sn4a\_  
d1kv0a\_ d21kba\_ d1npia\_ d1wwna\_ d1pe4a\_ d2kbka\_ d21i7a\_ d1djta\_  
d2kbha\_ d1dq7a\_ d1sega\_ d1omya\_ d1zywa1 d1jzaa\_ d1dy2a\_ d1iyjb4  
d1iyjb5 d1iyjb3 d1o7ia\_ d4ipca1 d1x3ea\_ d4apva\_ d1jb7a1 d1jb7a2  
d1jb7a3 d3kdfa\_ d1ue1b\_ d1wjja1 d3eiva\_ d1xjva2 d1xjva1 d2ccza2  
d1se8a\_ d111oc\_ d1jb7b\_ d1qvca\_ d3ulla\_ d1qzga\_ d1miua4 d1miua5  
d1miua3 d1y14b1 d2nn6i1 d1i94l\_ d2zjra2 d1smxa\_ d2qamc2 d1hh2p1  
d2r7da1 d1rl2a2 d1wfga1 d3bzka4 d1x6oa2 d3a0ja\_ d2j01d2 d2ja9a1  
d4q15a\_ d1hr0w\_ d1luza\_ d2n3sa\_ d2vnud1 d1h95a\_ d1go3e1 d2nn6h1  
d1ne3a\_ d2mo1a\_ d1iz6a2 d1jjga\_ d1e3pa2 d2ix0a3 d2ix0a2 d2lxja\_  
d1ueba3 d1ueba2 d2z0sa1 d1u01a1 d2ix0a1 d2eifa2 d2je6i1 d3i2za1  
d2c35b1 d2ahob2 d1t9ha1 d3i4oa\_ d2qall1 d1jt8a\_ d2nn6g1 d1g6pa\_  
d3cama\_ d1i94q\_ d1c9oa\_ d1d7qa\_ d2ba0a1 d2vnud2 d2vnud3 d1khia2  
d2qalq1 d1wi5a1 d1xtda2 d1dgsa2 d1fvial d1ckma1 d1p16a1 d1x9na2  
d1rpma\_ d2shpa1 d1yfoa\_ d118ka\_ d2ooqa1 d1g4us2 d1p15a\_ d1lara2  
d1lara1 d1wcha\_ d2fh7a2 d2fh7a1 d3azya\_ d3wvja\_ d1upsa1 d1ajoa\_  
d2hyka\_ d2vy0a\_ d1o4ya\_ d3o5sa\_ d3d6ea\_ d3atga\_ d1dypa\_ d1umza\_  
d3i4ia\_ d1tdha3 d1q3ba3 d1ee8a3 g1qmo.1 g1len.1 d3zyra\_ d1fnya\_  
d1n47a\_ g21tn.1 d1avba\_ d3usua\_ d1dhkb\_ d1f9ka\_ d1ukga\_ d1g8wa\_  
d1g9fa\_ d3wcsa\_ d1g7ya\_ g1loe.1 d1mvqa\_ d1hq1a\_ d1v6ia\_ d1dbna\_  
d1qnwa\_ d1fx5a\_ d418qa\_ d1ioaa\_ d3n35a\_ d3ubra\_ d1qo8a1 d1d4ca1  
d2k3va\_ d1ft5a\_ d1qdba\_ d1m1qa\_ d2j7aa\_ d1h21a\_ d1ogyb\_ d4fasa\_  
d1oaha\_ d1sp3a\_ d3h33a\_ d1rwja\_ d19hca\_ d1os6a\_ d3bxua\_ d3h4na\_  
d1i77a\_ d3caoa\_ d1j0pa\_ d2ctha\_ d1duwa\_ d2e84a\_ d1hh5a\_ d1gyoa\_  
d3h34a\_ d1wioa4 d1ccza2 d1vcaa1 d1dr9a2 d1ic1a1 d2d9qb1 d2nxyb2  
d2dara2 d2dara1 d1wyha2 d2dloa2 d1rutx4 d1rutx3 d2cuqa2 d1x41a2  
d1x41a1 d1x3ha2 d1x3ha1 d2d8za1 d1x61a2 d1x6aa1 d1x6aa2 d2cora2  
d2cora1 d1v6ga1 d1v6ga2 d2d8za2 d1x64a1 d1x64a2 d1b8ta1 d2co8a1  
d1x63a2 d2dj7a2 d2dj7a1 d2cu8a2 d2cu8a1 d1g47a2 d1g47a1 d1j2oa1  
d1wyha1 d2dloa1 d1wiga1 d1wiga2 d2cupa2 d2cupa3 d1x68a1 d2d8ya2  
d2d8ya1 d1m3va2 d1x62a1 d1x68a2 d1x61a1 d1b8ta3 d1b8ta2 d2d8xa2  
d2d8xa1 d1x4ka1 d1x4ka2 d2cuqa1 d1m3va1 d2co8a2 d1x63a1 d2cura1  
d2cura2 d1x62a2 d1op9a\_ d1y01a1 d1letzb1 d1egj11 d2gsib1 d1nj9a1  
d4jfhdl d1aqk11 d1t2ja\_ d1lo4h1 d1zvya1 d3v4v11 d4enec1 d1kxtb\_  
d5e8ea1 d2pxya\_ d4weud\_ d1xiwc\_ d2esvd1 d1qnzh\_ d1logae1 d1f4xh1  
d4n1hb\_ d3ezjb1 d3mlw11 d1kfah1 d1letza1 d1b4jh1 d3cfic\_ d4w68a\_

d2arja1 dlek3a\_ d2ok0l1 dlvera\_ dluwgh1 dlblnb1 dlfpth1 dlrzga1  
d2giya1 d4m3kb1 dlnc2a1 d2nyyd1 dlncna\_ dlfbih1 d5dxwa\_ d4fqqa1  
d1dqdh1 d1jfq11 d1kelh1 d1faih1 dlfrgl1 dlfigl1 d4m6nl1 d1fo0a\_  
d4hxb11 d3b5ga\_ d3quyd1 d2h9gb1 d1i8kb\_ d2dd8h1 d2ck0h1 d1eaja\_  
d4w6wb1 d2a6ib3 d1t66d1 d2e27h\_ d1ob1b1 d1f11b1 d2v7na1 d1ad0a1  
d2xt1b1 d1pskh1 d4i13b1 d2op4l1 d1a0ql1 d1uwel1 d1za3a1 d1ncbl1  
d4uu9a\_ d1bm3h1 d1cloh1 d1nqba2 d1cf8h1 d4y5va\_ d1mhph1 d5anma1  
d4cdgc1 d4ldeb\_ d1y0lb1 d2pcpb1 d1z3gl1 d1dfb11 d1fh5h1 d3g5xa1  
d1tzib1 d4dn3l1 d3zhka1 d2b1hh1 d2uyla1 d1f3dh1 d1nj9b1 d2agjh1  
d2h1pl1 d1q72h1 d8fabbl d1ndmb1 d1rjca1 d4u6hb1 d3upca\_ d2fbj11  
d1osph1 d1tvda\_ d2cjev\_ d4fhbd1 d1bd2d1 d1rz7h1 d3nn8a\_ d1knoa1  
d1nfda1 d2bmkb1 d1dq11\_ d1igyb1 d1igfl1 d12e8h1 d3utza1 d1nc2b1  
d1rihh1 d4mwfb1 d4jvpa1 d1mieh1 d1rhfa1 d1fgnl1 d1sbsh1 d1lp9e1  
d1dn0a1 d4lqf11 d1iaih1 d1kgcd1 d1mh5b1 d1gpol1 d2g60h3 d1f8t11  
d2jixd1 d4grwh\_ d1fo0b\_ d1bfob1 d1axsa1 d1u9ka\_ d1nmbh\_ d1h8na1  
d1h8na2 d1jguh1 d4eura1 d3sdy11 d35c8h1 d1w72l1 d1mvub\_ d1i9rh1  
d1ob1a1 d4wenb\_ d1yeeh1 d3ietc1 d1f58h1 d1ad0b1 d1mqkl\_ d1nbvh1  
d4b50a\_ d3r8bb\_ d1baf11 d1mamh1 d4rgne1 d2gsgb\_ d35c8l1 d1bafh1  
d1ailh1 d2pcpa1 d2fath1 d2x1pa\_ d1orsb1 d1ibgl1 d1shma\_ d1a2yb\_  
d1u0qa\_ d2coqa\_ d1hilb1 d1qfwi\_ d1jv5b\_ d1fn4b1 d5e0qa\_ d1nsnh1  
d1plgl1 d4ocxl1 d1kb5h1 d1rzfh1 d1pg7x1 d2fx7h1 d2oi9c\_ d1l7il1  
d3eyva1 d1d5il1 d4ffyl\_ d1tetl1 d1a6wh\_ d1ac6a\_ d3dvfa\_ d1nfde1  
d1mimh1 d1ri8a1 d1jhlh\_ d3dura\_ d1fskb1 d1f97a1 d3so3b1 d2ak4d1  
d1lp9f1 d4z7wf1 d1l7th1 d4y5ya\_ d4x7ec1 d1emth1 d1ikfl1 d1nlbh1  
d4uta11 d1bjma1 d1eapb1 d1u6ah1 d2dtgd1 d1kj2b\_ d1xeda1 d1c1eh1  
d1fgvh\_ d2bnub1 d2fb4h1 d2dtgb1 d1ktrh\_ d1jpth1 d1qkz11 d4hepg\_  
d2atpb1 d1flrh1 d2hrpl1 d1mvfa\_ d1iaim1 d3k80a1 d2jb5h1 d3zkxc\_  
d4grwe\_ d1it9h1 d1rhhb1 d3w9ec\_ d1e4wh1 d1sy6h1 d2j6eh1 d3qxta\_  
d1jglh1 d1p7ka1 d1tzhb1 d4n8pa1 d1gaf11 d2jelh1 d1wioa2 d4i0cc1  
d1cicb1 d1lmka2 d1lmka1 d1iqwh1 d1orqb1 d1ejoh1 d1jnlh1 d4zga1\_  
d43c9b\_ d1ggbl1 d1wejh1 d3q6fa1 d1f3dj1 d3c6la1 d1bqlh1 d3p9wb\_  
d1a3r11 d1h0db1 d2uzil\_ d1eo8l1 d1qfwl\_ d1n7ml1 d1igja1 d1c5ch1  
d2a9mh\_ d1rmfh1 d1fj1b1 d4heme\_ d1ccza1 d1a5fh1 d1logad1 d1dlfh\_  
d1qa9b\_ d1vgel1 d3qskb\_ d1sjxa\_ d4ozfg1 d1sq2n\_ d1qd0a\_ d1kcvh1  
d1c5db1 d3qcul1 d8faba1 d3bn9d1 d1mjuh1 d4y8dc\_ d7fabh1 d3dvgb1  
d1lo0l1 d1a6tb1 d1gigh1 d1kcrh1 d2hwz11 d1yjdc1 d3clfl1 d4krna\_  
d1d17l\_ d1e6ol1 d1mexh1 d3r0ma\_ d4kkna\_ d1fns11 d1loaqh\_ d1rzia1  
d1ucbh1 d1ncw11 d4b41a\_ d1nfdfl1 d2mpah1 d2d7t11 d4grwf\_ d4b5ea\_  
d1lk3h1 d3u79a\_ d4u3xa\_ d1ghfl1 d1bvkb\_ d1mcww1 d1b88a\_ d1jrhh1  
d32c2b1 d4wemb\_ d1dsfh\_ d1op3h1 d1ce111 d1iqda1 d1qoka1 d1qoka2  
d1qfuh1 d2crya1 d1ay1h1 d1loaql\_ d3ab0b\_ d1rur11 d1t4kb1 d1bz7b1  
d1n0xh1 d1for11 d1ucbl1 d4w6yb\_ d43c9a\_ d2aab11 d1tzia1 d4n1ca\_  
d1k6qh1 d3g9ab\_ d4tvsa1 d1igmh\_ d1pz5b1 d3dx9a1 d3wxwh\_ d1nakh1  
d1kcull d3eaka\_ d4qlra1 d1cr9l1 d1d9ka\_ d1f4xl1 d1deea1 d2i27n2

d1c12a1 d2orb11 d1j8hd1 d1mcph1 d1c5da1 d1kenh1 d1bd2e1 d1h5ba\_  
d4x7fc1 d3upaa\_ d1t3fa1 d1indh1 d2dtgc1 d4hc111 d1zv5a1 d4wgvb\_  
d1uwg11 d4f37k1 d1aqkh1 d1vesa\_ d3zkqd\_ d1fpt11 d11o411 d1knob1  
d3rrqa\_ d1ct8b1 d4orz\_ d1mlbb1 d4hgkc1 d1dqdl1 d1bogb1 d4ozhe1  
d1dr9a1 d1i7za1 d1dn0b1 d1kell1 d1rzib1 d1ypzf1 d1wtla\_ d1hkfa\_  
d1fail1 d1figh1 d2vyre\_ d1sjva\_ d1ohqa\_ d1bfoa1 d1pkqb1 d1mjul1  
d1b4j11 d1nsl1 d2arjb1 d1p4bh\_ d4aj0a\_ d3nn8b\_ d2rcja1 d1f2xk\_  
d4v1dd\_ d1adqh1 d2eksa\_ d4k3ga\_ d1jfqh1 d1uweh1 d1frgh1 d4gftb\_  
d1uz8b1 d4nlea\_ d1bm311 d1clol1 d3mcka1 d2vq1a1 d1ae6h1 d4aq1b1  
d1uj3b1 d1nbqa1 d1fh511 d2ck011 d2ywza\_ d1q7211 d4nxbx\_ d1hila1  
d4hzb1 d2j8811 d1zmya1 d1cd0a\_ d1a4ka1 d1psk11 d1a0qh1 d4krmb\_  
d1ncbh1 d2fbjh1 d1j8he1 d1i3ua\_ d1cf811 d1fe8h1 d2p1ya1 d1eeqa\_  
d2x89a\_ d1ol0a\_ d2r0lh1 d1ub5a1 d1dfbh1 d3eyvb1 d4jdvb1 d4p2cg\_  
d2gsia1 d2agj11 d1u3ha1 d2h1ph1 d1rih11 d1fskc1 d1boga1 d2a7711  
d1osp11 d1qfoa\_ d3dwta\_ d2fx711 d1rz711 d3stba1 d1pkqa1 d1b6da1  
d1dzba2 d1dzba1 d1kj2a\_ d4l1ha\_ d1rzgb1 d1dqlh\_ d12e811 d1miel1  
d1jmaa\_ d1sbs11 d1fgnh1 d1f5811 d1mqkh\_ d1ndgb1 d3qeg11 d1ia11  
d2aw2a1 d1tqbc1 d3fo2a1 d4dkaa\_ d1f8th1 d2g6011 d2ywy\_ d1uj3a1  
d1yc7a\_ d3bd3a\_ d4w6xb1 d1nmb1\_ d1i8ka\_ d1rjlb1 d1ypze1 d1p7kb1  
d1kxqe\_ d1gpoh1 d2z4qa1 d1w72h1 d1i9r11 d4qgya1 d4xt1c\_ d2qqnh1  
d1cical d3c08h1 d2cd0a\_ d2bdnh1 d1hnga1 d1maml1 d1nldh1 d1cr9h1  
d41cih1 d3bkyh1 d3qg711 d1ai111 d1kxvc\_ d4iosd\_ d117ih1 d2x1qa\_  
d1ub6b1 d3k74b\_ d1libgh1 d1teth1 d1igya1 d1hxma1 d2x6ma\_ d2e71a\_  
d5e03a\_ d1qfwm\_ d2r0kh1 d1igjb1 d1rurh1 d1plgh1 d1mj8h1 d1yuhb1  
d3fmg11 d1rzfl1 d1emt11 d1ad9b1 d1igtb1 d1nlb11 d1d5ih1 d3k7ua\_  
d4ffyh\_ d1bwwa\_ d3dvga1 d1a6ta1 d1fgvl\_ d4qxgl1 d1mim11 d1jh11\_  
d2hffb1 d2hh011 d1qkzh1 d117t11 d1afvh1 d1iaii1 d2cjuh\_ d1lum5h1  
d2ghwb2 d2ghwb1 d1kgce1 d2fgwh1 d1ikfh1 d1dvfd\_ d2i24n1 d2xtjb\_  
d1za3b1 d2yc1a\_ d2hh0h1 d2x1oa\_ d1bvka\_ d1rjla1 d5e7ba1 d1igta1  
d1i11b1 d2fb411 d1mvua\_ d1jpt11 d32c2a1 d1fvca\_ d1iqdb1 d2hrph1  
d2p4ab\_ d4qo1a\_ d1p2cb1 d1wt5c\_ d1t4ka1 d5c1mb\_ d1it911 d1bz7a1  
d1b2wh1 d1e4w11 d1jnl11 d1yedb1 d1za6b1 d3u7aa\_ d1igfh1 d3gnm11  
d1orsa1 d1wejl1 d1a2ya\_ d1hxmb1 d1gafh1 d2j4wh1 d1pz5a1 d1j05a\_  
d1a3rh1 d4fq111 d1qfwh\_ d1eo8h1 d1n7mh1 d4s11a\_ d1kegh1 d5da4a\_  
d1iqw11 d3whxb1 d1vgeh1 d1deeb1 d1c12b1 d1t2ql1 d1ad9a1 d3gsnb1  
d3b2uc1 d1ggbh1 d1t3fb1 d1nak11 d4ocmc\_ d1lila1 d2v7hb3 d2esve1  
d1mcoh1 d2qr0b1 d2q3aa\_ d1ct8a1 d1kcr11 d2pxyb\_ d2uzih\_ d5c3ld\_  
d3durb\_ d1c5cl1 d2ak4e1 d1d17h\_ d1xiwd\_ d1mlba1 d1rmfl1 d1i7zb1  
d1dlfl\_ d2xa3a\_ d5bq7b1 d1dqqb1 d3h4211 d1legjh1 d1kcv11 d1fe811  
d2j6e11 d1f3rb2 d11k311 d1sm3h1 d1q0xh1 d1ghfh1 d7fab11 d1igch1  
d11o0h1 d4idla\_ d5c2b1\_ d1jrh11 d1i11a1 d3zhda1 d4kfcz\_ d1b0wa\_  
d1e6oh1 d1mex11 d4krpb\_ d1fnsh1 d1ncwh1 d4hgma\_ d4eigb1 d4rzca\_  
d2mpa11 d4y5xa\_ d5en2b1 d3lrga1 d4ej1c1 d1rhha1 d1j05b\_ d1forh1  
d1q9wb1 d2wzpd\_ d2aq2a1 d1h0da1 d3revb1 d2ij0c1 d1tzh1 d4m7j11

d1k6q11 d3b9kc1 d1igml\_ d3qeua1 d1dsfl\_ d1celh1 d1kcu1 d1zvha1  
d1zvoa1 d1tqbb1 d1ay111 d2qsc11 d2cgrh1 d1nl0h1 d1ken11 d3eo0a1  
d4n9ob1 d1n0xl1 d3k1kc\_ d1c4qa\_ d1prtc1 d2wv6d\_ d1prt1\_ d1ltrd\_  
d4l63b1 d1r4pb\_ d1prtd\_ d1tl0f\_ d2bosa\_ d1prtb1 d3chbd\_ d2aq2b1  
d1ck1a1 d1enfa1 d1i4pa1 d1v1oa1 d1et9a1 d1esfa1 d2g9hd1 d4ohja1  
d1klud1 d1bxta1 d1eu3a1 d1ty0a1 d1fnua1 d2cqva1 d1fhga\_ d2k1ma\_  
d2d12a1 d1biha3 d1biha1 d1biha4 d3qp3a1 d1glca\_ d1gxea\_ d1cvsc2  
d1cvsc1 d1xmwa2 d2otpa2 d1biha2 d1rhfa2 d2fcba2 d2fcba1 d1wwbx\_  
d1gsma2 d1epfa1 d1epfa2 d2dava1 d1waaa\_ d1f97a2 d1x44a1 d1vcaa2  
d1fnla2 d1fnla1 d3b5ha2 d3h8na2 d3h8na1 d1jbj1 d1jbj2 d1pd6a\_  
d1f2qa2 d1f2qa1 d3cx2a\_ d1nbqa2 d3b5ha1 d1n26a1 d1xiwb\_ d1xaua\_  
d1fltx\_ d2ifga1 d1olla1 d1olla2 d1cs6a4 d1cs6a3 d1cs6a2 d1cs6a1  
d2gw5a2 d1sy6a1 d1xiwa\_ d1lucta2 d1lucta1 d1ry7b2 d1gl4b\_ d1qz1a3  
d1olza1 d2c9aa1 d1wwca\_

**Family-41 (b.60.1.2)**

**Positive dataset contains 16 protein sequences.**

d2ftba\_ d2rcqa1 d4lkpa\_ d1sa8a\_ d1vyfa\_ d3vg7a1 d4azqa1 d5bvqa\_  
d2qo4a\_ d1yiva1 d4bvma1 d4tkba\_ d4i3ba\_ d4gkca\_ d3p6da1 d2a0aa1

**Negative dataset contains 3965 protein sequences.**

d1m32a\_ d1libja\_ d1c7na\_ d1iuga\_ d4q75a\_ d2bkwa1 d1t3ia\_ d1qz9a\_  
d1jf9a\_ d1leg5a\_ d1p3wa\_ d3kgwa\_ d1cl1a\_ d2ctza1 d1vjoa\_ d2rfva\_  
d1gc0a\_ d1cs1a\_ d1d2fa\_ d2ch1a1 d1qgna\_ d1pffa\_ d1elua\_ d1xfda2  
d2bnma2 d3i2ka1 d1lnsa3 d1mpxa2 d1xkta1 d2hfka\_ d5d3ka\_ d2cfba1  
d1dfoa\_ d1o69a\_ d1bj4a\_ d3k28a\_ d2bwpa\_ d3lg0a\_ d2fnua\_ d3ou5a\_  
d1z7da1 d1liaya\_ d4msoa\_ d1bs0a\_ d1s0aa\_ d1sffa\_ d3tqxa\_ d1mdoa\_  
d3qboa\_ d3pgya\_ d1bjna\_ d2dkja\_ d1ejia\_ d1vefa1 d4wxga\_ d3bs8a\_  
d3gbxa1 d1w23a\_ d1m8pa3 d1ddla\_ d1e57b\_ d1f56a\_ d1bypa\_ d1azca\_  
d1ws8a\_ d3u25a\_ d1cuoa\_ d1rkra\_ d2iaac\_ d4dp1x\_ d1nwpa\_ d2gima\_  
d2i7sa\_ d1qhqa\_ d1gyca3 d1hfua2 d1kbva1 d1kbva2 d1sdda1 d1sdda2  
d1gyca2 d1mzya1 d2bw4a1 d1aoza1 d1aoza3 d1aoza2 d1kyaa2 d1kyaa3  
d1kyaa1 d1mzya2 d4e9sa1 d1sddb1 d1sddb2 d1hfua1 d1hfua3 d1oe1a2  
d1oe1a1 d1v10a2 d1v10a3 d1v10a1 g1f8v.1 d1novc\_ d2bbvc\_ g1gk9.1  
g1cp9.1 g1e3a.1 d4qgna\_ d1vr3a1 d2h0va\_ d4alac\_ d1rera1 d1s6na\_  
d3uzqb\_ d2ph1a2 d2ph1a1 d1fxza2 d1fxza1 d1lrha\_ d1uija1 g1dgw.1  
d2v09a\_ d1uika2 d1uika1 d1ktja\_ d3us3a3 d3us3a1 d1v70a\_ d2f4pa1  
d1yhfa1 d4w9ta\_ d4x2ra1 d1ka9f\_ d1qo2a\_ d4axka1 d1thfd\_ d1h5ya\_  
d4u28a\_ d2y88a\_ d4wd0a\_ d1vzwa1 d1bh9b\_ d1tafb\_ d1jfib\_ d1q9ca\_  
d1h3ob\_ d2byka1 d1n1ja\_ d4g92b\_ d1bh9a\_ d1jfia\_ d1h3oa\_ d2bykb1  
d1n1jb\_ d4lt9a1 d3tc7a1 d3hoja\_ d1i4na\_ d3vnda\_ d3n18a1 d1geqa\_  
d3nava1 d1v5xa\_ d4a2ra1 d3tc6a1 d1ujpa\_ d4ijba\_ d1xcfa\_ d1vc4a\_  
d1rd5a\_ d1qopa\_ d3b5va\_ d2bjca1 d2hsga1 d1qpza1 d1efaa1 d1ydwa2  
d2nvwa2 d1h6da2 d1zh8a2 d1xeea2 d1tlta2 d1r0ka3 d1j5pa3 d1vkoa2  
d1vm6a2 d3qvsa2 d1gr0a2 d1p1ja2 d2ovga\_ d1sq8a\_ d1rzsa\_ d3kz3a\_  
d3orca\_ d3gpdg2 d2q49a2 d1hdgo2 d2g17a2 d2cvoa2 d2czca1 d3pwka2

d1obfo2 d1i32a2 d1zyao2 d2pkqo2 d1b7go2 d2hjsa2 d1cf2o2 d1vkna2  
d1nvm2 d2m9wa1 d3dfxa\_ d2msya\_ d2djoa1 d2r5za\_ d1au7a1 d1f43a\_  
d2lmda1 d1akhb\_ d1s7ea1 d3nara\_ d1zq3p1 d2craa1 d1mija\_ d4uuta\_  
d3a01a\_ d1x58a1 d3rkqa1 d3cmya1 d2cqxa1 d2da6a1 d1e3oc1 d1fj1a\_  
d1ig7a\_ d1x41a1 d1wh7a1 d1gt0c1 d2mw8a\_ d1lfup\_ d1x2ma1 d1b72a\_  
d1wi3a1 d1jgga\_ d1wjha1 d1x2na1 d1mnm\_ d2cuea1 d3k2aa\_ d2hosa\_  
d2jwta2 d1pufa\_ d1oetc1 d2hi3a\_ d1b8ia\_ d4j19a\_ d3lnqa\_ d1wh5a1  
d1b8ib\_ d1fexa\_ d2cqra1 d1guua\_ d1lug2a1 d2cqqa1 d2ajea1 d4a69c\_  
d1h8ac1 d2crga1 d2iw5b1 d1xc5a1 d1ofcx1 d2cu7a1 d1wgxa1 d2cjja1  
d2ckxa1 d1gvda\_ d1hcra\_ d1tc3c\_ d1gdta1 d1u78a2 d6paxa1 d6paxa2  
d1k78a2 d1hlva1 d1iufa2 d1iufa1 d2iu5a1 d1zk8a1 d2g7sa1 d2fd5a1  
d2np5a1 d1z0xa1 d2id6a1 d2d6ya1 d2i10a1 d1vi0a1 d2oi8a1 d3c07a1  
d2ns7a1 d2fq4a1 d2yvea1 d1t33a1 d2o7ta1 d1rkta1 d2np3b1 d2g7ga1  
d2gena1 d2fbqa1 d2g71a1 d2gfna1 d2g3ba1 d2jj7a1 d2hyja1 d1sgma1  
d1ui5a1 d2hkua1 d2id3a1 d4jyka1 d3lv8a\_ d1s3ga1 d1zaka1 d1s4qa\_  
d3tvta2 d1uf9a\_ d1khta\_ d1ckea\_ d1osna\_ d1p5zb\_ d4tmka\_ d3cm0a\_  
d1jaga\_ d3h86a\_ d1t0hb\_ d1nn5a\_ d2h92a\_ d3kb2a1 d2c95a1 d1yj5a2  
d1kgda\_ d1ly1a\_ d2ak3a1 d1vyva2 d1deka\_ d2grja1 d1p3ja1 d1y63a\_  
d1e4ya1 d1s96a\_ d3iija1 d1lvga\_ d1nksa\_ d1vyua2 d4e22a\_ d1qf9a\_  
d1jjva\_ d1q3ta\_ d1ki9a\_ d1lw7a2 d1teva\_ d1kjwa2 d1gsia\_ d2iyva2  
d1viaa\_ d1e6ca\_ d1g3ma\_ d1j99a\_ d1t8ta1 d1nsta\_ d1fmja\_ d1zrha\_  
d1ls6a\_ d2a3ra\_ d1aqua\_ d2zptx\_ d3ckla\_ d1texa\_ d1q44a\_ d2gwha\_  
d1odfa\_ d4gi7a\_ d2jeoa1 d1rz3a\_ d1z0ja1 d3umra2 d3gj0a1 d2gaoa1  
d1yzga1 d1x3sa1 d1g7sa4 d1puja\_ d1udxa2 d1kk1a3 d2o52a\_ d1jwyb\_  
d1zcaa2 d1zcba2 d2fv8a1 d2cjwa\_ d3dz8a1 d1xzpa2 d1vg8a\_ d4qxaa\_  
d2ew1a1 d1x1ra1 d2bcgy\_ d3doea1 d3cona\_ d3rega\_ d3wyga\_ d1upta\_  
d2b6ha1 d1zd9a1 d1lnza2 d1r5ba3 d1n0ua2 d1r2qa\_ d2f91a1 d2rhda\_  
d3q3jb\_ d3q85a\_ d1efma1 d1r8qa\_ d2gf9a1 d2akab1 d1ek0a\_ d1z08a1  
d2gcoa1 d2dy1a2 d4g01b\_ d2cxa1 d1svia\_ d3q72a\_ d1ni3a1 d4ac9a4  
d2erxa1 d2bmea\_ d1wxqa1 d2gf0a1 d4ldja1 d1zunb3 d1d5ca\_ d4lv5b\_  
d1efca3 d1kmqa\_ d2g6ba1 d3lrpa\_ d1tada2 d2y8ea\_ d4rd4a1 d1z06a1  
d2heia\_ d3a58b\_ d1u01a2 d1d2ea3 d1zj6a1 d2ocba\_ d3rwoa\_ d1mr3f\_  
d2e9sa1 d4u5xa1 d2iwra\_ d2fn4a1 d3bwdd\_ d2nzja1 d2atva1 d2ksqa\_  
d3l43a\_ d1mkya2 d1mkya1 d1wmsa\_ d1jnja3 d2rmka\_ d1f6ba\_ d1f60a3  
d1gota2 d1jala1 d2fh5b1 d1g16a\_ d2wblc\_ d1m7ba\_ d1wf3a1 d1f5na2  
d1t9ha2 d1z6xa1 d1z0aa1 d2fg5a1 d2a5ja1 d2bcjq2 d1s0ua3 d1ky3a\_  
d4y0va\_ d4lhwa\_ d2qmea1 d2atxa1 d1legaa1 d1ryha\_ d1moza\_ d1nrjb\_  
d2erya1 d3bfka\_ d1puia\_ d3j3az1 d3t5ga\_ d1shza2 d3defa\_ d2f7sa1  
d3raba\_ d3tsoa\_ d3aq4a\_ d2a17a1 d3sfva1 d3bc1a\_ d1sdma\_ d3h4sa1  
d2heha\_ d2grya\_ g3kin.1 d1kk8a2 d1br2a2 d1goja\_ d1f9va\_ d2mysa2  
d1lkxa\_ d3t0qa\_ d4db1a1 d3gbja\_ d1ry6a\_ d1v8ka\_ d1k8ka2 d1k8ka1  
d3uleb1 d3i33a2 d3i33a1 d1bupa1 d1dkgd2 d1dkgd1 d4ci6a2 d1jcfa1  
d4a2ba2 d2fxua1 d1yaga2 d1yaga1 d4cbua2 d1bupa2 d1g99a2 d2e1za2  
d2e1za1 d1saza1 d1saza2 d1ig8a1 d1czan2 d1czan3 d1czan1 d1ig8a2

d1czan4 d1bg3a4 d1bg3a2 d1bg3a1 d3h3no1 d3h3no2 d3ezwa2 d1js9c\_  
d1f15b\_ d1za7a\_ d1laja\_ d4zzva\_ d2xspa\_ dlegla\_ d4v20a\_ dlojja\_  
d4ipma1 d1gpia\_ d4csia\_ d3pfza\_ d2yoka\_ d2nqya\_ d1h4ga\_ d1hixa\_  
d1oa2a\_ d1olra\_ d3b7ma\_ d4h7ma1 d3wp3a\_ d2vgda\_ d1ligoa\_ d3zsea\_  
d2nlra\_ d3wx5a\_ d1oa3a\_ d1pvxa\_ d1f5ja\_ d1oa4a\_ d1ks5a\_ d4ixla1  
d1evsa\_ d1cnt1\_ d1pvhb\_ d1z7ca\_ d1huwa\_ d1bgea\_ d1rhga\_ d1f6fa\_  
d1f45b\_ d1ilrb\_ d1letea\_ d3tgxb\_ d2z3qa1 d3qb1a\_ d1hula\_ d1m48a\_  
d4nkqb\_ d1eera\_ d1v7mv\_ d5e4ea\_ d2o27a\_ d3b5ka\_ d2psma1 d4zf7a\_  
d3uf5a\_ d4x51a\_ d4ypgc1 d3oq3a\_ d1lqsl\_ d1n1fa\_ d1aula\_ d1wu3i\_  
d3bes1\_ d3ux9a\_ d1v8fa\_ d2ejca\_ d3muea1 d1ihoa\_ d3q12a1 d4dnxa2  
d1m8pa2 d1g8fa2 d1jhda2 d1x6va2 d3rbaa\_ d2qtra\_ d1nupa\_ d3l92a\_  
d1f9aa\_ d1qjca\_ d2h29a\_ d1vlha\_ d1od6a\_ d1lw7a1 d1mrza2 d4ruka\_  
d2e17a\_ d1liq0a2 d1irxa2 d1r6ta2 d1ivsa4 d2cyba\_ d1rqga2 d1j09a2  
d2yxna\_ d1f7ua2 d1h3fa1 d1ffya3 d2g36a1 d1nzja\_ d1n3la\_ d1i6la\_  
d1pfva2 d1h3na3 d3n9ia\_ d3sz3a1 d3sw2a\_ d1moxc\_ d1dx5i3 d1edmb\_  
d1aut12 d1aut11 d1nqlb\_ d1dva11 d1szba2 d1kigl\_ d2y5fl\_ d1ijqa2  
d1gk5a\_ d1g1sa2 d1nt0a3 d1xdtr\_ d1lmja2 d1lmja1 d1nzia2 d2wphe\_  
d1klil\_ d1pfx12 d1pfx11 d1p9ja\_ d1g1ta2 d1f7ea\_ d4yzub\_ d2y5ia\_  
d1qlsa\_ d1psra\_ d3n22a\_ d2egda\_ d4ggfc\_ d2wcea\_ d2luca\_ d4aqia\_  
d3nsia\_ d2lp3a\_ d1j55a\_ d1a4pa\_ d1k8ua\_ d1nsha\_ d1pvaa\_ d3fs7a\_  
d2pvba\_ d1ttxa\_ d2kyfa\_ d1rk9a\_ d1a75a\_ d1exra\_ d1tiza1 d1nyaa\_  
d1g8ia\_ d1ggwa\_ d1wdcc\_ d3fwba\_ d1ggza\_ d2o5ga\_ d1ctaa\_ d3i5gc\_  
d1sl8a\_ d1fpwa\_ d2scpa\_ d2roaa\_ d4aqra\_ d3pn7b\_ d1br1b\_ d2mysb\_  
d1s6ca\_ d1bjfa\_ d2obha\_ d1jfka\_ d1jf0a\_ d1qv0a\_ d1lkja\_ d2mlfc\_  
d2m97a\_ d2d8na\_ d4by5a\_ d1jbaa\_ d4nqga\_ d1wdcb\_ d2mysc\_ d1j7qa\_  
d1s6ia\_ d1uhka2 d1r2ua\_ d1dtla\_ d3kf9a\_ d3pn7c\_ d1fi6a\_ d1c07a\_  
d5d67d\_ d1tuza\_ d1h8ba\_ d1eg3a2 d2zkmx1 d1snla\_ d1gjya\_ d1y1xa\_  
d1hqva\_ d1dvia\_ d1qxp2a\_ d4usla\_ d1k94a\_ d1sfsa\_ d1wkya2 d1uuqa\_  
d3wh9a\_ d4m1ra\_ d1xyza\_ d4xuya\_ d2je8a5 d4bf7a1 d3cuia\_ d1ur4a\_  
d1qw9a2 d1odza\_ d2vzsa5 d1bqca\_ d2x2ya1 d1hjqa\_ d1qnra\_ d4y7ea1  
d1vjza\_ d4k68a\_ d2v3ga\_ d4hpga\_ d1nofa2 d1nq6a\_ d1h4pa\_ d1aq0a\_  
d3ziza\_ d4bs0a\_ d1ecea\_ d1h1na\_ d1ta3b\_ d1w91a2 d1i1wa\_ d1uhva2  
d1us3a2 d1egza\_ d7a3ha\_ d1tvna1 d3nyda1 d1ghsa\_ d2cyga1 d4xv0a\_  
d2c8na2 d1w32a\_ d3emca\_ d1v6ya1 d1foba\_ d2uwfa1 d2fgla\_ d3niya1  
d2c0ha1 d1rh9a1 d1yq2a5 d1szna2 d1fa2a\_ d1pama4 d5do8a1 d1ea9c3  
d1hx0a2 d2fhfa5 d1qhoa4 d1avaa2 d1m53a2 d4m8ua1 d2gjpa2 d1lwha2  
d4howa1 d1ktba2 d1j0ha3 d3vm5a1 d2x1ia\_ d1wzaa2 d1uasa2 d2diea1  
d1mxga2 d1ht6a2 d1eswa\_ d1liv8a2 d5cpsa\_ d1ud2a2 d1zjaa1 d3gbea1  
d1kwga2 d1wdpa\_ d1gcya2 d1g5aa2 d1hvxa2 d3dhpa2 d2bhua3 d4do4a1  
d3qgva1 d1e43a2 d1g94a2 d2d3na2 d1gjwa2 d1gvia3 d1x1na1 d1r7aa2  
d1tz7a1 d4toqa\_ d1wb0a1 d1w9pa1 d1eoka\_ d1itxa1 d1kfwal d1goia2  
d1edqa2 d2gsja\_ d1hjxa1 d1jnda1 d1vf8a1 d3wdpp1 d3wq5a\_ d1gnxa\_  
d4gxpa\_ d4hz8a\_ d1e4mm\_ d3aiua\_ d1wcga1 d1qvba\_ d3ahxa\_ d1v02a\_  
d2dgaa\_ d1pbga\_ d1vffa1 d1qoxa\_ d4ha4a\_ d1t77a2 d3syxa1 d1mkea1

d2p8va\_ d1xoda1 d1i7aa\_ d1evha\_ d1qc6a\_ d1legxa\_ d1lid1a\_ d2hmta\_  
d1lssa\_ d1liuka\_ d2csua1 d3q9ub\_ d2yv1a1 d3q9na\_ d2d59a\_ d1oi7a1  
d2yv2a1 d1y81a1 d1wgqa1 d1v89a1 d2coda1 d1zc3b\_ d1wg7a1 d1u5ea1  
d1v61a1 d2coca1 d2ys1a1 d1v5pa1 d1ntya2 d1wjma1 d1wi1a1 d1u29a\_  
d1xx0a1 d1unqa\_ d2zkmx3 d1fhoa\_ d1v88a1 d2adza1 d1x1fa1 d1p6sa\_  
d2coaa1 d1btka\_ d1v5ma1 d1faoa\_ d2x18a\_ d1dyna\_ d1x1ga1 d4kaxb\_  
d2j59m1 d1ki1b2 d1xcga2 d1txda2 d1u5da1 d1dbha2 d1wl1ha\_ d1lupqa\_  
d1v5ua1 d1foea2 d2fj1a1 d1eaza\_ d2dfka2 d2cofa1 d1kz7a2 d91dta1  
d2ewda3 d1up7a1 d2dfda1 d1s6ya1 d1vjta1 d7mdha1 d1hyea1 d1t2da1  
d1oj3a3 d1b8pa1 d1ldna1 d1hyha1 d1civa1 d2a92a1 d1ez4a1 d1i0za1  
d1y6ja1 d1gv0a1 d1ur5a1 d1ll1da1 d1obba1 d1v8ba1 d1gdha1 d1l7da1  
d2dlda1 d1mx3a1 d1ygya1 d1qp8a1 d1li4a1 d2naca1 d3t4ea2 d1a4ia1  
d1o0sa1 d2hk9a2 d2egga2 d1b26a1 d1bvua1 d1gq2a1 d1c1da1 d1leha1  
d1gtma1 d1euza1 d1nvtal d3dona2 d1edza1 d1gpja2 d1vi2a1 d1p77a1  
d1nyta1 d1b0aa1 d1vl6a1 d1v91a1 d1txga2 d3f47a1 d1mv8a2 d2pv7a2  
d1xc2a3 d2ahra2 d4xiya1 d2f1ka2 d1pgja2 d1i36a2 d1np3a2 d1lj8a4  
d1teaa3 d1qmg2 d2i76a2 d2g5ca2 d1wdka3 d3cuma3 d1kola2 d1f8fa2  
d1qora2 d1jqba2 d1vj0a2 d1cdoa2 d1gu7a2 d1d1ta2 d1xa0a2 d2dm6a2  
d1jvba2 d1rjwa2 d1llua2 d1h2ba2 d1tt7a2 d1piwa2 d1o89a2 d1iz0a2  
d1e3ja2 d1yb5a2 d1uufa2 d1vj1a2 d1e3ia2 d3gpdg1 d1vc2a1 d2nvwa1  
d1u8fo1 d1ydwa1 d1hdgo1 d2g17a1 d1cf2o1 d2czca2 d1r0ka2 d1obfo1  
d2cvoa1 d1ebfa1 d1h6da1 d1i32a1 d1zh8a1 d2q49a1 d1qkia1 d1j5pa4  
d3pzra1 d1xeaa1 d1vkoa1 d1vm6a3 d3qvsa1 d2pkqo1 d1b7go1 d1gr0a1  
d1p1ja1 d1lc0a1 d1j0xo1 d3pwka1 d2hjsa1 d1zyao1 d1vkna1 d1t1ta1  
d1nvmbl d3sjua\_ d3ojfa1 d1xu9a1 d2jjya1 d1n7ha\_ d1y1pa1 d1h5qa\_  
d1jtva\_ d4fs3a\_ d2bkaa1 d1gy8a\_ d2c5aa1 d1ulsa\_ d1ooea\_ d2b69a1  
d1y5ma1 d1spxa\_ d1aela\_ d1bxka\_ d1ydea1 d1gega\_ d1hdoa\_ d1o5ia\_  
d1e6ua\_ d1snya1 d2rhca\_ d3zv4a\_ d5ceja\_ d2d1ya1 d1fjha\_ d3w8ea\_  
d2fmua1 d1x1ta\_ d1rpna\_ d3ay7a1 d1k2wa\_ d1eq2a\_ d2hrba1 d3ruaa\_  
d2ew8a1 d4hwka\_ d1xgka\_ d2bd0a1 d1yo6a1 d2a35a1 d2ntva\_ d1vl8a\_  
d1hdca\_ d4bkua\_ d2ag5a1 d2q45a\_ d1nffa\_ d4iy1a\_ d1zbqa1 d1kewa\_  
d1ek6a\_ d1ja9a\_ d2q46a2 d1iy8a\_ d1cyda\_ d2ptga\_ d1hxha\_ d1uzma1  
d3lyla\_ d4m89a\_ d3wyea\_ d2blla1 d1w6ua\_ d1sb8a\_ d2q2va\_ d4nr0a\_  
d1e6wa\_ d2gasa\_ d3oiga1 d2bgka1 d1mxha\_ d1vl0a1 d1rkxa\_ d1r6da\_  
d1wmaa1 d1e7wa\_ d2c07a1 d1xkqa\_ d3tzha\_ d1g0oa\_ d3lz6a\_ d1qyca\_  
d1ledoa\_ d1gz6a\_ d1oc2a\_ d1t2aa\_ d1zema1 d2xoxa\_ d1z45a2 d1geea\_  
d1p33a\_ d3lt0a\_ d4e6pa\_ d2wyua\_ d1db3a\_ d4q9na\_ d1xhla\_ d4o1ma\_  
d1fmca\_ d2uvda\_ d2gdza1 d1uaya\_ d2z1ma\_ d2o23a2 d2fr1a2 d2fr1a1  
d1qsga\_ d1qyda\_ d4zjua\_ d2a4ka1 d1yb1a\_ d1wvga1 d1yxma1 d3f4ba\_  
d1mg5a\_ d1xg5a1 d1r55a1 d3gboa\_ d1atla\_ d1kufa\_ d1buda\_ d4q1la\_  
d1yp1a\_ d1wnia\_ d4ekfa\_ d2ckga\_ d1th0a\_ d2bkra\_ d1ex0a4 d1g0da4  
d2f4ma1 d1x3za\_ d3u1ra1 d1kapp2 d1k7ia2 d3ioqa\_ d1fh0a\_ d1o0ea\_  
d1khqa\_ d1m6da\_ d1cs8a\_ g8pch.1 d1s4va\_ d2pnsa\_ d1vsna1 d1mira\_  
d1iwda\_ d2oula\_ d7pcka\_ d3bwka\_ d3bcna\_ d2p86a\_ d1pvja\_ d1pcia\_

d1gece\_ d1deua\_ d4bs6a\_ d1xkga1 d1cqda\_ d1jqpa2 d2c0ya\_ d2bdza\_  
d3p5ua\_ d2o36a\_ d1k9xa\_ d1ex4a2 d1c6va\_ d2jk6a2 d2jk6a1 d1fecal  
d1fecal d1lpfa1 d1lpfa2 d1xhca1 d1xhca2 d1dsla2 d1dsla1 d1gera2  
d1m6ia2 d1onfa1 d1onfa2 d3lada2 d3lada1 d1w4xa1 d1w4xa2 d1gesa2  
d1mo9a1 d1xdia1 d1fl2a2 d1fl2a1 d1fcda1 d1fcda2 d1h6va2 d1h6va1  
d1mo9a2 d1gv4a2 d1gv4a1 d2gv8a2 d2gv8a1 d1aoga1 d1aoga2 d1hyua1  
d1ebda1 d1ebda2 d3dk9a1 d1qlra2 d1qlra1 d1gesa1 d1g4ma1 d1pn0a1  
d1reoal d1ju2a1 d2f5va1 d3c96a1 d2gmha1 d1pj5a2 d1gpea1 d1o5wa1  
d1n4wa1 d1k0ia1 d2dw4a2 d2ivda1 d1seza1 d2voua1 d1kdga1 d2bcgg1  
d2bcgg2 d2flia1 d1rpxa\_ d1tqja\_ d1tqxa\_ d1b9ra\_ d1offa\_ d1frfa\_  
d3wcqa\_ d1e9ma\_ d1l5pa\_ d1wria\_ d1i7ha\_ d3av8a\_ d1czpa\_ d1rfka\_  
d3plma1 d3b2ga\_ d2bt6a2 d1mpya2 d1kw3b2 d1kw3b1 d4ghga1 d1tfza1  
d3isqa1 d3isqa2 d1sqia1 d1sqia2 d1lkda2 d1lkda1 d1mpya1 d1cjxa2  
d1sp9b2 d1t47a1 d1t47a2 d1flua2 d1sp8a1 d1sp8a2 d1flua1 d1jmx4  
d1pbya3 d1pbya4 d1jmx2 d1pbya1 d1pbya2 d1faaa\_ d1wika1 d1xfla\_  
d1ttza1 d2f51a1 d1ti3a\_ d1nhoa\_ d1sena\_ d2i4aa\_ d1lep7a\_ d1zmaa1  
d1fo5a\_ d3lefa1 d3diea1 d2yana1 d1z6na1 d1oaza\_ d3zywa1 d4aj8a\_  
d1nm3a1 d4fiwa\_ d1wmja\_ d4hs1a1 d1liloa\_ d1xwaa1 d1wjka1 d2vmla\_  
d1fb6a\_ d1gh2a\_ d1h75a\_ d1nw2a\_ d1kx5b\_ d3a6na\_ d4m6ba2 d2nqbd\_  
d3wkjd\_ d2yfwe\_ d4h9na\_ d5bnxa\_ d1kx5c\_ d3r45a\_ d1eqzb\_ d4jjnb\_  
d1f66c\_ d1eqza\_ d4wnnb\_ d1kx5a\_ d1u35c1 d1id3a\_ d2nqbc\_ d1kx5d\_  
d1ku5a\_ d1fl1ea\_ d2b5ea2 d2b5ea3 d2b5ea1 d2b5ea4 d2kp1a1 d2kp2a1  
d1hyua3 d1hyua4 d1j08a1 d1j08a2 d1pd212 d1nhya2 d2a2ra2 d1k0dd2  
d1f2ea2 d1gsua2 d1f3ba2 d2fhea2 d2pvqa1 d1tw9a2 d1oyja2 d1e6ba2  
d1k0ma2 d3ik7a1 d4is0a1 d1r5aa2 d1j1va2 d1m0ua2 d3gtub2 d1z9ha2  
d1okta2 d1axda2 d1tu7a2 d1k3ya2 d1zgma1 d1b48a2 d1gnwa2 d1gwca2  
d2gsta2 d1glqa2 d1oe8a2 d1pn9a2 d1v2aa2 d1fw1a2 d1duga2 d1dosa\_  
d3qm3a1 d2fjka\_ d1qusa\_ d1qqya\_ d1gd6a\_ d1f6ra\_ d1livma\_ d2gv0a\_  
d1iiza\_ d2z2fa\_ d1j8xa\_ d1ghla\_ d1b9oa\_ d1741a\_ d1691a\_ d2o4wa\_  
d1p37a\_ d1k28a3 d1xjta1 d1jtma\_ d2f2qa\_ d4e97a1 d2pjsa1 d1k1la\_  
d2i7ra1 d1ecsa\_ d1xqaa1 d5cj3a1 d1npba\_ d2p7oa\_ d1r9ca\_ d1nkia\_  
d1hroa\_ d4gedb\_ d3zooa\_ d1mz4a\_ d1gu2a\_ d1f1fa\_ d1dvva\_ d1c6ra\_  
d1c75a\_ d1e29a\_ d1gdva\_ d1cnoa\_ d1h32b\_ d1co6a\_ d2bh4x\_ d2aiua\_  
d5cytr\_ d1jdl1a\_ d1i8oa\_ d2zboa\_ d3dmia\_ d1ls9a\_ d1wvec\_ d2yk3a\_  
d3ph2b\_ d1dw0a\_ d5aura\_ d1ql3a\_ d1qn2a\_ d1flca\_ d2bema\_ d1pama1  
d1ea9c1 d1qhoa1 d2fhfa2 d2fhfa1 d1k3ia1 d1j0ha1 d1csla1 d2bhua1  
d1ledqa1 d1flsa2 d1ut9a2 d1gvial d1txka1 d1etob\_ d1lumqa\_ d1g2ha\_  
d2hqya1 d2hqya2 d1ne9a1 d1lrza3 d1ne9a2 d1xvqa1 d1pn0a2 d3hy2a\_  
d2cvba1 d1o8xa\_ d1lu4a\_ d1we0a1 d2bmxal d2a4va1 d1psqa\_ d1xiya1  
d1q98a\_ d1n8ja\_ d1zofa1 d2ggta\_ d3tjja\_ d4je1a1 d3s9fa\_ d2zcta\_  
d1qmva\_ d1jfua\_ d2b1ka\_ d5dvba1 d2b5xa1 d2v2ga\_ d1st9a\_ d3tb2a\_  
d4llra\_ d4fh8a1 d1e2ya\_ d1knga\_ d2h30a\_ d1i5ga\_ d2z9sa\_ d2f8aa1  
d1tp9a1 d2b7ka\_ d1nm3a2 d3hvva\_ d2wfca1 d4kcea\_ d1xvwa1 d4gqca1  
d3qpma\_ d4k1fa\_ d1zzoa1 d1gp1a\_ d1prxa\_ d4od7a1 d1z6ma1 d4mcua1



d4dvca1 d1r4wa\_ d3l9sa\_ d3rppa\_ dlzsqa1 d1rmka\_ dlixta\_ dleyoa\_  
d1cnaa\_ d1fu3a\_ d1g1pa\_ d1f3ka\_ d1fyga\_ d1f74a\_ d3l21a\_ d2e1da\_  
d1to3a1 d1w3ia\_ d1sfla\_ d1n7ka\_ d1vcva1 d4imea\_ d1wa3a\_ d2ocza1  
d1f2ja\_ d3m16a\_ d2yxga\_ d1ub3a\_ d3a5fa\_ d1fbaa\_ d1l6wa\_ d1xfba1  
d1wx0a1 d1vpxa1 d1ojxa\_ d1mxsa\_ d2a4aa1 d1xkya1 d3cq0a1 d3s1xa\_  
d1f05a\_ d1fdja\_ d3cp1a1 d4d2ja\_ d1e88a1 d1l6ja5 d1l6ja4 d1eaka4  
d1eaka3 d1h8pa2 d1h8pa1 d1jgta2 d1ofda3 d1ea0a3 d1ecfa2 d1ct9a2  
d1ao0a2 d1te5a\_ d3rp2a\_ glucy.1 d1fuja\_ d2zchp\_ d3w94a\_ d1si5h\_  
d1lo6a\_ g2pka.1 d1cgha\_ d1kigh\_ d1a5ia\_ d3s9ba\_ d1hj8a\_ d1ao5a\_  
d2anya\_ d1q3xa1 d1gvza\_ d4gsoa\_ d2f91a1 d1iaua\_ d1gdna\_ d1eufa\_  
g1fiw.1 d1eq9a\_ d4nfea\_ d2rdla\_ d1spja\_ d1elva1 d1a7sa\_ d1ekbb\_  
d1pfxc\_ d1yc0a\_ d2aiqa\_ g1fiz.1 d1fi8a\_ d4k60a\_ d4dgja\_ d1mzaa\_  
d1op0a\_ d3tjva\_ d1pytd\_ d1sgfg\_ g1gg6.1 d2eeka\_ g1rtf.1 d1a0ja\_  
d3g01a\_ d1pytc\_ d4e7na\_ d1ddja\_ d1z8ga1 d2hlca\_ d1npma\_ d1brup\_  
g1jou.1 d1sgfa\_ d1autc\_ g2hnt.1 g1kdq.1 d1orfa\_ d3s69a\_ d4crga\_  
d1fxya\_ d1bqya\_ d1lgya\_ d4l3wa\_ d1llfa\_ d1gz7a\_ d1lukca\_ d3groa\_  
d1pjaa\_ d1ei9a\_ d1svpa\_ d1mbma\_ d3su6a1 d1cula1 d4agka\_ d1vcpa\_  
d1q31a\_ g1n1l.1 d3e90b\_ d1ep5a\_ d3u1jb\_ d3zxha\_ d1cgl\_a\_ d1rm8a\_  
d1eaka2 d1hy7a\_ d2jsda\_ d1cxva\_ d1i76a\_ d1eb6a\_ d1jx4a2 d3gv5b1  
d1t94a2 d3bq0a2 d2tbvc\_ d1c8nc\_ d1x36a\_ d1ng0c\_ d4sbvc\_ d1lopa\_  
d1f2nc\_ d1cixa\_ d1y29a\_ d1v7fa\_ d2jtba\_ d1d1ha\_ d1g9pa\_ d1lupa\_  
d1qk7a\_ d1mb6a\_ d2a2va\_ d1niya\_ d1hvwa\_ d2mpqa\_ d1ie6a\_ d1kqha\_  
d1la4a\_ d2mxoa1 d1d10a\_ d1koza\_ d1qk6a\_ d1emxa\_ d1lqra\_ d1c6wa\_  
d3ljq\_a\_ g1k2x.1 d1rypd\_ d1irua\_ d1rypc\_ d3unfk\_ d1rypa\_ d1j2pa\_  
d1irui\_ d1j2qh\_ d3unfh\_ d1m4ya\_ d1rypb\_ d1irul\_ d1irug\_ d1iru2\_  
d1q5rh\_ d1rypg\_ d1g3ka\_ d1iruf\_ d1q5qa\_ d1e94a\_ d1irub\_ d1ryph\_  
d3ty6a\_ d1iruj\_ d1iruk\_ d1rype\_ d1irud\_ d1irue\_ d3mi01\_ d1rypf\_  
d1iruh\_ d2z3ba\_ d1iruc\_ d3mka2\_ d1irul\_ d1ny721\_ d1ny722\_ d1a6ca3  
d1a6ca1 d1pgl22\_ d1pgl21\_ d1pgl11\_ d1ny711\_ d1mqta\_ d1d4m3\_ d1fmd3\_  
d2mev1\_ g1aym.1 d1ev13\_ d4q4w1\_ d1r1a3\_ d2x5ia\_ d1rhi1\_ g1r1a.1  
g1d4m.1 g1rhi.1 d1b35b\_ d1lopa\_ d1tme1\_ d4iv1a\_ g1pvc.1 g1fpn.1  
d1fpn1\_ d4gb31\_ d1d4m1\_ d1fmd1\_ d1ev11\_ d2wzr3\_ g1cov.1 d1qqp3\_  
g1fmd.1 d2x5ic\_ d1rhi3\_ g1oop.1 d1hxs1\_ g1hxs.1 d1fpn3\_ d1bev1\_  
g2mev.1 d1eah3\_ d1aym1\_ d1pvc3\_ d1zba3\_ d1h8ta\_ d3vbhc\_ g1b35.1  
g1bev.1 d1hxs3\_ g1ev1.1 d1bev3\_ g1tmf.1 d1tmf1\_ d1b35a\_ d2mev3\_  
g1eah.1 g1h8t.1 d1eah1\_ d4q4w3\_ d1r1a1\_ d1aym3\_ d1pvc1\_ d1zba1\_  
d1h8tc\_ d1oopc\_ d1tme3\_ g1qqp.1 d4iv1c\_ g1tme.1 d3ubub\_ d1egia\_  
d1qo3c\_ d1v7pa\_ d1tdqb\_ d3ubua\_ d1c3ab\_ d1h8ua\_ d3bx4b\_ d1t8ca1  
d1sb2a1 d1qdda\_ d2ziba1\_ d3cada\_ d1byfa\_ d1j34b\_ d1jwia\_ d1jzna\_  
d1c3aa\_ d1oz7b\_ d1wmza\_ d3bdwb\_ d1hq8a\_ d1fifa1\_ d3hupa\_ d1wk1a1  
d1umra\_ d2afpa\_ d3bx4a\_ d1gz2a\_ d1s16a\_ d1v7pb\_ d3g8ka\_ d1ixxa\_  
d1j34a\_ d1jwib\_ d1g1sa1\_ d1y17a1\_ d1ja3a\_ d1fvub\_ d3bdwa\_ d1sb2b1  
d1fvua\_ d1umrc\_ d1oz7a\_ d4m17a\_ d3cfwa1\_ d1ypqa1\_ d1g1ta1\_ d3fd4a\_  
d3l9jc\_ d4dn8a1\_ d1v41b\_ d1rd11\_ d2msba\_ d1rw1a\_ d1z3ea1\_ d3l78a\_

d1prt2 d2r80b\_ d1cqxa1 d1cg5a\_ d1gcvb\_ d3boma\_ d2h8fb\_ d2raoa\_  
d3bj1a\_ d4hrrb\_ d2r50a\_ d3d1kb\_ d2aa1b1 d3zhwa\_ d3hf4b\_ d3gdja\_  
d1jebb\_ d3bj1b\_ d1x9fb\_ d1wmub\_ d1gcva\_ d3bcqb\_ d3d4xb\_ d2dc3a\_  
d3hf4a\_ d4yu3a\_ d3k8ba\_ d1qpwb\_ d2r80a\_ d3bcqa\_ d1v4wa\_ d3wtgb\_  
d1j17a\_ d4esaa\_ d1a9we\_ d3d1ab\_ d1fsla\_ d4h21a\_ d1v4wb\_ d1mwca\_  
d1vhba\_ d1jeba\_ d1spgb\_ d1h97a\_ d1q1fa\_ d1tu9a1 d3d1aa\_ d1hdsb\_  
d3hyub\_ d2zfb\_ d3fs4a\_ d1oj6a\_ d1shrb\_ d4h21b\_ d4yu3b\_ d1spga\_  
d3hrwa\_ d3qqra\_ d3at5a\_ d4wchd\_ d3hyua\_ d1cg5b\_ d1uc3a\_ d1hbra\_  
d2raob\_ d1outb\_ d4esab\_ d3gdjb\_ d3qqqa\_ d1x9fc\_ d3vrfa\_ d1litha\_  
d3mkba\_ d3d4xa\_ d3mjpa\_ d1j16a\_ d3fh9a\_ d1outa\_ d2dc3b\_ d1lit2a\_  
d3eoka\_ d3g46a\_ d1qpwa\_ d3vrfb\_ d1ch4a\_ d1x9fd\_ d1hdsa\_ d2zfba\_  
d3mkbb\_ d1or4a\_ d3wtga\_ d1a4fa\_ d3fh9b\_ d3bomb\_ d3cy5a\_ d3at5b\_  
d1x9fa\_ d2oifa\_ d4lmb\_ d1cpcb\_ d3v57a\_ d1kn1a\_ d1cpc\_ d4f0ta\_  
d2vjha\_ d4po5b\_ d1eyxa\_ d1alla\_ d4f0tb\_ d1b33b\_ d1b8db\_ d4h0mb\_  
d1b33a\_ d2vjhb\_ d4lmb\_ d2vmlb\_ d1allb\_ d2vjta\_ d3dbja\_ d2vmla\_  
d2vjtb\_ d4f0ub\_ d1f99b\_ d4rmpa1 d1liaa\_ d1eyxb\_ d2uulb\_ d4lmsb\_  
d4f0ua\_ d2bv8a\_ d1f99a\_ d2bv8b\_ d2c71b\_ d3dbjb\_ d4rmpb1 d1b8da\_  
d4h0ma\_ d3v57b\_ d1kn1b\_ d1liab\_ d2uula\_ d2j96a\_ d1kyqa1 d3nqyb\_  
d4gera\_ d1bqba\_ d2xqfa\_ d1f6wa\_ d1dx4a\_ d1qe3a\_ d1k4ya\_ d4qwwa\_  
d2ha2a\_ d3c8da2 d2pbla1 d1jkma\_ d1jjia\_ d1jjfa\_ d4iuaa3 d4bvva\_  
d5hpga\_ d3k65a\_ d1ki0a3 d1ki0a2 d1ki0a1 d1a0ha1 d1pmla\_ d3sp8a3  
d2feba1 d1mdwa\_ d1ziva1 d1zcm1 d2m5ta\_ d1cqqa\_ d1wqsa\_ d5bpea\_  
d2ipha\_ d1lvoa\_ d2bhga1 d3tnta\_ d3sjia\_ d3d23a1 d2fyqa\_ d3tloa\_  
d3zvea1 d2hrva\_ d3q3ya1 d4asha1 d1cg2a1 d1yloa2 d1y7ea2 d1y0ya3  
d1lfwa1 d1vixa1 d1fnoa4 d1vh0a2 d1ysja1 d1vhea2 d1z21a1 d2fvga2  
d1r3na1 d2grea2 d1xmba1 g1q71.1 d1rtqa\_ d1ra6a\_ d1muka\_ d3gsza\_  
d1te9a\_ d2xwha\_ d3uqsa\_ d3hkwa\_ d3n6ma\_ d2cjqa\_ d2xyma\_ d1teba\_  
d1te8a\_ d1s48a\_ d1u09a1 d4wfxa\_ d3tyqa\_ d2pgga1 d1m41a\_ d2bk7a\_  
d3fjua\_ d1z5ra1 d1kwma1 d1uwya2 d1jqga1 d2c1ca1 d1tda\_ d1h81a2  
d3lgia\_ d3i77a\_ d2z9ia2 d4nsva\_ d1lcya2 d4jcna\_ d1agja\_ d1os8a\_  
d1hpga\_ d1p3ca\_ d1l1ja\_ d1qtfa\_ d1e69a\_ d1mv5a\_ d3g60a4 g1ii8.1  
d1ewqa2 d1ji0a\_ d1qhla\_ d1v43a3 d2wmfa1 d1vpla\_ d1g2912 d4a82a2  
d2d62a1 d3tuic1 d2bbsa1 d3g60a3 d2ixea\_ d1g6ha\_ d1sgwa1 d2qi9c\_  
d3rlfa1 d3b60a1 d3d31a2 d2pzea1 g1xew.1 d1jj7a\_ d1loxxk2 d2onka1  
d1wlwa\_ d1liwa\_ d1qf5a\_ d1vmaa2 d1nija1 d1np6a\_ d2p67a1 d3ihla\_  
d1okkd2 d1l1sa2 d1s1ma2 d1liona\_ d2v40a\_ d3hida\_ d2v01a1 d2g0ta1  
d1vcoa2 d1j8mf2 d1g3qa\_ d1xjca\_ d1p9ba\_ d1qzxa3 d1hiva2 d1hiva1  
d2qm8a\_ d1dj2a\_ d4ioja\_ d1cp2a\_ d1yrba2 d1hyqa\_ d3gqba2 d1skye3  
d1xp8a1 d1tf7a2 d1tf7a1 d1ye8a1 d1skyb3 d2qe7d2 d4blta\_ d4huta\_  
d3l1daa2 d4hyya\_ d2i3ba1 d1cr1a\_ d3j9tb2 d3ntua2 d1vdza1 d2z43a\_  
d1e9ra\_ d1nlfa\_ d3ziaa2 d1n0wa\_ d1g6oa\_ d3ziad2 d3j9ta2 d1pzna2  
d3gqbb2 d2i49a\_ d1nnfa\_ d1xvxa\_ d1ursa\_ d1h3da1 d1iuda\_ d4mlva1  
d1twya\_ d3e13x\_ d2nxoa1 d4pfua\_ d3ttma\_ d1elja\_ d2qmwa1 d1y3na1  
d1jeta\_ d1uqwa\_ d4f19a1 d2esna2 d3thia\_ d3fasa1 d2uyeb\_ d2xwva1

d1r9la\_ d2fyia1 d1pb7a\_ d2ozza1 d1sw5a\_ d1nh8a1 d1vr5a1 d2g29a\_  
d1xs5a\_ d3lswa\_ d2z23a\_ d3w9va\_ d3tcha\_ d1q35a\_ d1z7me1 d3q27a\_  
d1p99a\_ d1ve4a1 d2i6ea1 d4mcoa1 d4n8ya\_ d1eu8a\_ d1zba1 d1hsla\_  
d1ixca2 d1j1na\_ d1xvya\_ d1y9ua\_ d2z22a1 d1xoca1 d4oera\_ d1wdna\_  
d5f1qa1 d1xt8a1 d1i6aa\_ d4gwoa\_ d4igta1 d1pc3a\_ d4mmpa1 d1o63a\_  
d2czla1 d2onsa2 d4mija1 d1eh3a\_ d3skpa\_ d1dtza1 d1dtza2 d1ieja\_  
d1jnfa2 d1ce2a1 d1jnfa1 d1b1xa2 d1b1xa1 d1jw1a1 d1jw1a2 d1ryoa\_  
d1h76a1 d1h76a2 d1w52x1 d2pp1a1 d1hpla2 d1lpbb2 d2oxea1 d1bu8a2  
d1rpla2 d1c4oa1 d2p6ra3 d2p6ra4 d1oywa2 d1oywa3 d1wrba1 d1w36b2  
d1w36b1 d1c4oa2 d3bora\_ d1t6na\_ d2eyqa5 d2eyqa3 d2eyqa2 d2zu6a2  
d1veca\_ d1uaaa1 d1w36d1 d2g9na1 d1z3ix2 d2rb4a\_ d1hv8a1 d1hv8a2  
d1t5ia\_ d1w36c2 d2j0sa2 d2j0sa1 d1fuka\_ d3hjha1 d1z5za1 d1qdea\_  
d1z63a1 d1s2ma2 d1s2ma1 d1wp9a1 d1wp9a2 d1gm5a3 d1gm5a4 d3dina4  
d3dina3 d1q0ua\_ d1w36c1 d1z3ix1 d1nкта3 d1uaaa2 d1w36d2 g1qhh.1  
d2fwra2 d2fwra1 d3q3ma\_ d1za0a1 d1mxra\_ d2inca\_ d1jk0a\_ d2incb\_  
d1mhyb\_ d3hf1b\_ d1mtyb\_ d1r2fa\_ d2uw1a\_ d3n37a\_ d1afra\_ d1oquc\_  
d1syya\_ d1mtyd\_ d2o1za\_ d1uzra\_ d1smsa\_ d2fkza\_ d1zuja1 d1s3qa1  
d2fjca1 d1z6om1 d1veia\_ d4dyya\_ d1jiga\_ d3gvya\_ d2pyba\_ d4cy9a1  
d3bvfa1 d1r03a\_ d2cf7a\_ d1nf4a\_ d1zs3a1 d4iwka\_ d3ka8a\_ d3np0x\_  
d1n1qa\_ d1lb3a\_ d4e6ka\_ d1z6oa1 d2fzfa1 d4dyua\_ d3ge4a\_ d1jgca\_  
d4am4a\_ d2z6ma\_ d1ji5a\_ d1vlga\_ d1lkoa1 d1krqa\_ d3qz3a\_ d1o9ra\_  
d2ffxj\_ d1euma\_ d1yv1a1 d2v2pa\_ d1j30a\_ d4di0a\_ d1dpsa\_ d1oewa\_  
d2qzxa\_ d2asia\_ d1psoe\_ d1miqa\_ d1smra\_ d2h6ta\_ d1pfza\_ d1lizda\_  
d3hd8a\_ d1j71a\_ d1dpja\_ d4aa9a\_ d1t6ex\_ g1b5f.1 g1lya.1 d1qdma2  
d1bxoa\_ d1wkra\_ d1tzsa\_ d1libqa\_ d2qzwa\_ d2v76a\_ d1wj1a1 d1aqca\_  
d1qqga2 d1qqga1 d1ntva\_ d1n3ha\_ d4dbba\_ d3f0wa1 d1p3ra\_ d1wgua1  
d2cy4a1 d3hqca\_ d1wvha1 d1xr0b1 d1bdqa\_ d3ggta\_ d3ixoa\_ d1mrxa\_  
d2haha\_ d1tw7a\_ d4njja\_ d1sgua\_ d2p3da\_ d1nsoa\_ d3d3ta\_ d2rkfa\_  
d1c6ya\_ d3ogpa\_ d3ekwa\_ d2o4na\_ d2j9ja\_ d1baia\_ d3ggua\_ d3lzua\_  
d4npua\_ d4j55a\_ d2r8na\_ d2fxda\_ d2p3ca\_ d4dqa\_ d3ttpa\_ d3t3ca\_  
d2p3aa\_ d2hc0a\_ d2fdda\_ d3mwsa\_ d1lum8a\_ d1ixza\_ d1qvra2 d1qvra3  
d1qzma\_ d1sxjc2 d1jr3d2 d2p65a\_ d1l8qa2 d1g8pa\_ d3hu3a3 d1sxjd2  
d1njfa\_ d1in4a2 d1sxja2 d1tuea1 d2ce7a2 d1w5sa2 d1sxjb2 d1d2na\_  
d1ny5a2 d1ofha\_ d2gnoa2 d2a5yb3 d1fnna2 d1u0ja1 d1lv7a\_ d1liqpa2  
d2fnaa2 d1ixsb2 d4gita\_ d1sxje2 d1g41a\_ d1k8rb\_ d1wgra1 d1ef5a\_  
d1wfy1 d1e8ya3 d1wgya1 d1l1fda\_ d2cs4a1 d1wxma1 d2byea1 d3kh0a1  
d2byfa1 d1wxaa1 d1e7ua3 d1h4ra3 d4y18a1 d2a16a3 d1wgda1 d1wgg1  
d4q5eb\_ d1wjna1 d1se9a\_ d3n3kb\_ d1wz0a1 d1we6a1 d2m0xa\_ d2gbka\_  
d3rt3b1 d1wh3a1 d1sifa\_ d2ekek2 d4ii2b1 d4hk2a1 d1c3ta\_ d1m94a\_  
d1wgha1 d1ttna1 d1j8ca\_ d1wx8a1 d3v6cb1 d2ma9b\_ d4i6lb1 d1bt0a\_  
d2jvca1 d1iyfa\_ d2k1fa\_ d1wxva1 d1wf9a1 d1t0ya\_ d2io0b2 d1x1ma1  
d2gbma\_ d1zw7a1 d2m17a\_ d1we7a1 d2lwpa\_ d2gbja\_ d1wjua1 d1v6ea1  
d1v86a1 d4eewa\_ d1wiaa1 d4icva\_ d4gu2a\_ d1wx7a1 d1wy8a1 d4hka1  
d2faza1 d1v5oa1 d2h1ia1 d2r8ba1 d3b5ea1 d3cn9a\_ d2h0ba\_ d2erfa\_

d1h30a1 d3mw4a1 d1pz7a\_ d2r1ba\_ d3v64a1 d1d2sa\_ d3bopa1 d3mw3a1  
d1okqa1 d1okqa2 d1s5ja1 d2hbja2 d2igia\_ d1wlja\_ d1qhta1 d4dlea1  
d1tgoa1 d2f96a1 d3tr8a1 d3mxma\_ d1q8ia1 d1y97a1 d1w0ha\_ d1kfsa1  
d2py5a1 d1d5aa1 d1yt3a3 d2guia\_ d3mwpa1 d4kb1a\_ d1wioa4 d1ccza2  
d1vcaa1 d1dr9a2 d1ic1a1 d2d9qb1 d2nxyb2 d1adqa1 d1fnga1 d1uvqb1  
d1zs8a1 d2vola1 d2vola2 d1mfbl2 d2jelh2 d1uwel2 d3qq4b1 d1kjob\_  
d1k5na1 d1osph2 d4odhl2 d1ow0a1 d1ow0a2 d1bfob2 d3l9ra2 d3jtth1  
d2fath2 d4elkb2 d1fn4b2 d2xfxb\_ d1pg7x2 d1cqka\_ d4k71b2 d1lk2a1  
d1eapb2 d4lfhg2 d1i4fa1 d2nw2a2 d1kfah2 d1mhca1 d1h3ua1 d1wejh2  
d1h0db2 d1a5fh2 d1kcvh2 d1mjuh2 d1qqda1 d1kcrh2 d1k8ia1 d3huja2  
d2nnab1 d1nfd2 d3mffb2 d1s9va1 d1lk3h2 d1q0x12 d1fv1b1 d1neza1  
d4rfeb2 d1r3ha1 d1a6tb2 d1kjva1 d1pz5b2 d1onqa1 d2bc4a2 d1de4a1  
d1k8da1 d1tcra2 d1dn0b2 d1nfde2 d2xwtb2 d1bfoa2 d1mexh2 d1iakb1  
d1ypzf2 d4f7ea2 d1q7212 d2fbjh2 d1fe8h2 d1clzh2 d1fngb1 d1uvqa1  
d1vgka1 d1c16a1 d4j12a2 d4x99b2 d1igtb3 d1je6a1 d1q72h2 d1nldh2  
d1teth2 d2hmic2 d1i1ca2 d1i1ca1 d1k8ib1 d1q0yh2 d1kfa12 d3frua1  
d1pg7w2 d1u58a1 d1igyb4 d1igyb3 d1hyrc1 d1klub1 d1deeb2 d1c12b2  
d2bc4b2 d2ig2h2 d1kcvl2 d3wn5b1 d1lk2b\_ d1lk312 d1mjul2 d1sm3h2  
d1q0xh2 d1zvsal d1ydpal d1u8ib2 d1ypze2 d1kcuh2 d2e3fa\_ d1mm0a\_  
d2e3ea\_ d2l1da\_ d2ny8x\_ d2e3ga\_ d2ny9x\_ d2nz3a\_ d21j7a\_ d1n4na\_  
d2m8bb1 d2kyqa\_ d3psma\_ d1jxca\_ d2g11a\_ d1ugla\_ d4uj0a\_ d2k4ua\_  
d1hp2a\_ d2lu9a\_ d1baha\_ d2meoa1 d1wm7a\_ d1hlya\_ d1n8ma\_ d1jlza\_  
d1wpda\_ d1c55a\_ d1pvza\_ d1wt7a\_ d1rjia\_ d1wz5a\_ d1m2sa\_ d1pjva\_  
d1c49a\_ d1qkya\_ d2ktca1 d1wmta\_ d1du9a\_ d1j5ja\_ d1r1ga\_ d1e3oc2  
d1ic8a2 d1t0za\_ d2i61a\_ d1t1ta\_ d1sn4a\_ d1kv0a\_ d21kba\_ d1npia\_  
d1wwna\_ d1pe4a\_ d2kbka\_ d2li7a\_ d1djta\_ d2kbha\_ d1dq7a\_ d1sega\_  
d1omya\_ d1zywa1 d1jzaa\_ d2jca\_ d1n9wa1 d1bbua1 d1e1oa1 d1c0aa1  
d1l0wa1 d3a74a1 d1eova1 d1iyjb4 d1iyjb5 d1iyjb3 d1o7ia\_ d4ipca1  
d1x3ea\_ d4apva\_ d1jb7a1 d1jb7a2 d1jb7a3 d3kdfa\_ d1ue1b\_ d1wjja1  
d3eiva\_ d1xjva2 d1xjva1 d2ccza2 d1se8a\_ d1l1oc\_ d1jb7b\_ d1qvca\_  
d3ulla\_ d1qzga\_ d1miua4 d1miua5 d1miua3 d3g48a1 d1gd7a\_ d1mkha\_  
d1jjcb3 d1pyba\_ d1y14b1 d2nn6i1 d1i941\_ d2zjra2 d1smxa\_ d2qamc2  
d1hh2p1 d2r7da1 d1rl2a2 d1wfga1 d3bzka4 d1x6oa2 d3a0ja\_ d2j01d2  
d2ja9a1 d4q15a\_ d1hr0w\_ d1luza\_ d2n3sa\_ d2vnud1 d1h95a\_ d1go3e1  
d2nn6h1 d2mo1a\_ d1iz6a2 d1jjga\_ d1e3pa2 d2ix0a3 d2ix0a2 d2lxja\_  
d1ueba3 d1ueba2 d2z0sa1 d1u0la1 d2ix0a1 d2eifa2 d2je6i1 d3i2za1  
d2c35b1 d2ahob2 d1t9ha1 d3i4oa\_ d2qall1 d1jt8a\_ d2nn6g1 d1g6pa\_  
d3cama\_ d1i94q\_ d1c9oa\_ d1d7qa\_ d2ba0a1 d2vnud2 d2vnud3 d1khia2  
d2qalq1 d1wi5a1 d1xta2 d1ny4a\_ d1dgsa2 d1fvia1 d1ckma1 d1p16a1  
d1x9na2 d1rpma\_ d2shpa1 d1yfoa\_ d1l8ka\_ d2ooqa1 d1g4us2 d1p15a\_  
d1lara2 d1lara1 d1wcha\_ d2fh7a2 d2fh7a1 d3azya\_ d3wvja\_ d1upsa1  
d1ajoa\_ d2hyka\_ d1ajka\_ d2vy0a\_ d1o4ya\_ d3o5sa\_ d3d6ea\_ d3atga\_  
d1dypa\_ d1umza\_ d3i4ia\_ d1c1la\_ d4lbqa\_ d1a78a\_ d1slta\_ d4no4a\_  
d3zsja\_ d3duia\_ d1is3a\_ d1qmja\_ d1hlca\_ g1len.1 d3zyra\_ d1fnya\_

d1n47a\_ g2ltn.1 d1avba\_ d3usua\_ d1dhkb\_ d1f9ka\_ d1ukga\_ d1g8wa\_  
d1g9fa\_ d1wbfa\_ d3wcsa\_ d1g7ya\_ g1loe.1 d1mvqa\_ d1hqla\_ d1v6ia\_  
d1dbna\_ d1qnwa\_ d1fx5a\_ d4l8qa\_ d1ioaa\_ d3n35a\_ d3h33a\_ d1rwja\_  
d19hca\_ d1os6a\_ d3bxua\_ d3h4na\_ d1i77a\_ d3caoa\_ d1j0pa\_ d2ctha\_  
d1duwa\_ d2e84a\_ d1hh5a\_ d1gyoa\_ d3h34a\_ d1dszb\_ d1a6ya\_ d3cbba\_  
d1ynwa1 d1r4ia\_ d2hana\_ d2hanb\_ d2enva1 d1kb4b\_ d2n11b\_ d1lo1a\_  
d1cita\_ d2dara2 d2dara1 d1wyha2 d2dloa2 d1rutx4 d1rutx3 d2cuqa2  
d1x4la2 d1x4la1 d1x3ha2 d1x3ha1 d2d8za1 d1x61a2 d1x6aa1 d1x6aa2  
d2cora2 d2cora1 d1v6ga1 d1v6ga2 d2d8za2 d1x64a1 d1x64a2 d1b8ta1  
d2co8a1 d1x63a2 d2dj7a2 d2dj7a1 d2cu8a2 d2cu8a1 d1g47a2 d1g47a1  
d1j2oa1 d1wyha1 d2dloa1 d1wiga1 d1wiga2 d2cupa2 d2cupa3 d1x68a1  
d2d8ya2 d2d8ya1 d1m3va2 d1x62a1 d1x68a2 d1x61a1 d1b8ta3 d1b8ta2  
d2d8xa2 d2d8xa1 d1x4ka1 d1x4ka2 d2cuqa1 d1m3va1 d2co8a2 d1j2oa2  
d1x63a1 d2cura1 d2cura2 d1x62a2 d1op9a\_ d1y0la1 d1letzb1 d1legj11  
d2gsib1 d1nj9a1 d4jfhdl d1aqk11 d1t2ja\_ d1lo4h1 d1zvya1 d3v4v11  
d4enec1 d1kxtb\_ d5e8ea1 d2pxya\_ d4weud\_ d1xiwc\_ d2esvd1 d1qnzh\_  
d1ogae1 d1f4xh1 d4n1hb\_ d3ezjb1 d3mlw11 d1kfah1 d1letza1 d1b4jh1  
d3cfic\_ d4w68a\_ d2arja1 d1ek3a\_ d2ok011 d1vera\_ d1luwgh1 d1blnb1  
d1fpth1 d1rzga1 d2giya1 d4m3kb1 d1nc2a1 d2nyyd1 d1ncna\_ d1fbih1  
d5dxwa\_ d4fqqa1 d1dqdh1 d1jfq11 d1kelh1 d1faih1 d1frgl1 d1fig11  
d4m6n11 d1fo0a\_ d4hxb11 d3b5ga\_ d3quyd1 d2h9gb1 d1i8kb\_ d2dd8h1  
d2ck0h1 d1eaja\_ d4w6wb1 d2a6ib3 d1t66d1 d2e27h\_ d1ob1b1 d1f11b1  
d2v7na1 d2xt1b1 d1pskh1 d4i13b1 d2op411 d1a0ql1 d1luwel1 d1za3a1  
d1ncb11 d4uu9a\_ d1bm3h1 d1c1oh1 d1nqba2 d1cf8h1 d4y5va\_ d1mhph1  
d5anma1 d4cdgc1 d4ldeb\_ d1y0lb1 d2pcpb1 d1z3gl1 d1dfb11 d1fh5h1  
d3g5xa1 d1tzib1 d4dn311 d3zhka1 d2b1hh1 d2uyla1 d1f3dh1 d1nj9b1  
d2agjh1 d2h1pl1 d1q72h1 d8fabb1 d1ndmb1 d1rjca1 d4u6hb1 d3upca\_  
d2fbj11 d1osph1 d1tvda\_ d2cjvh\_ d4fhbd1 d1bd2d1 d1rz7h1 d3nn8a\_  
d1blna1 d1knoa1 d1nfda1 d2bmkb1 d1dq11\_ d1igyb1 d1igf11 d12e8h1  
d3utza1 d1nc2b1 d1rihh1 d4mwfb1 d4jvpa1 d1mieh1 d1rhfa1 d1fgn11  
d1sbsh1 d1lp9e1 d1dn0a1 d4lqf11 d1iaih1 d1kgcd1 d1mh5b1 d1gpol1  
d2g60h3 d1f8tl1 d2jixd1 d4grwh\_ d1fo0b\_ d1bfob1 d1axsa1 d1u9ka\_  
d1nmbh\_ d1h8na1 d1h8na2 d1jguh1 d4eura1 d3sdy11 d35c8h1 d1w7211  
d1mvub\_ d1i9rh1 d1ob1a1 d4wenb\_ d1yeeh1 d3ietc1 d1f58h1 d1ad0b1  
d1mqk1\_ d1nbvh1 d4b50a\_ d3r8bb\_ d1baf11 d1mamh1 d4rgne1 d2gsgb\_  
d35c811 d1bafh1 d1ai1h1 d2pcpa1 d2fath1 d2x1pa\_ d1orsb1 d1ibgl1  
d1shma\_ d1a2yb\_ d1u0qa\_ d2coqa\_ d1hilb1 d1qfwi\_ d1jv5b\_ d1fn4b1  
d5e0qa\_ d1nsnh1 d1plgl1 d4ocxl1 d1kb5h1 d1rzfh1 d1pg7x1 d2fx7h1  
d2oi9c\_ d1l7il1 d3eyva1 d1d5il1 d4ffyl\_ d1tet11 d1a6wh\_ d1ac6a\_  
d3dvfa\_ d1nfde1 d1mimh1 d1ri8a1 d1jhlh\_ d3dura\_ d1fskb1 d1f97a1  
d3so3b1 d2ak4d1 d1lp9f1 d4z7wf1 d1l7th1 d4y5ya\_ d4x7ec1 d1emth1  
d1likf11 d1nlbh1 d4utal1 d1bjma1 d1eapb1 d1u6ah1 d2dtgd1 d1kj2b\_  
d1xeda1 d1c1eh1 d1fgvh\_ d2bnub1 d2fb4h1 d2dtgb1 d1ktrh\_ d1jpth1  
d1qkz11 d4hepg\_ d2atpb1 d1flrh1 d2hrpl1 d1mvfa\_ d1iaim1 d3k80a1

d2jb5h1 d3zkxc\_ d4grwe\_ dlit9h1 d1rhbb1 d3w9ec\_ d1e4wh1 d1sy6h1  
d2j6eh1 d3qxta\_ d1jglh1 d1p7ka1 d1tzhb1 d4n8pa1 d1gaf11 d2jelh1  
d1wioa2 d4i0cc1 d1cicb1 d1lmka2 d1lmka1 d1iqwh1 d1lorqb1 d1ejoh1  
d1jnlh1 d4zgl1\_ d43c9b\_ d1ggbl1 d1wejh1 d3q6fa1 d1f3dj1 d3c61a1  
d1bqlh1 d3p9wb\_ d1a3r11 d1h0db1 d2uzil\_ d1eo811 d1qfwl\_ d1n7ml1  
d1igja1 d1c5ch1 d2a9mh\_ d1rmfh1 d1fj1b1 d4heme\_ d1ccza1 d1a5fh1  
d1ogad1 d1dlfh\_ d1qa9b\_ d1vgel1 d3qskb\_ d1sjxa\_ d4ozfg1 d1sq2n\_  
d1qd0a\_ d1kcvh1 d1c5db1 d3qcul1 d8faba1 d3bn9d1 d1mjuh1 d4y8dc\_  
d7fabh1 d3dvgb1 d1lo011 d1a6tb1 d1gigh1 d1kcrh1 d2hwz11 d1yjdc1  
d3clfl1 d4krna\_ d1d171\_ d1e6o11 d1mexh1 d3r0ma\_ d4kkna\_ d1fnsl1  
d1oaqh\_ d1rzia1 d1ucbh1 d1ncw11 d4b41a\_ d1nfdfl1 d2mpah1 d2d7t11  
d4grwf\_ d4b5ea\_ d1lk3h1 d3u79a\_ d4u3xa\_ d1ghfl1 d1bvkb\_ d1mcww1  
d1b88a\_ d1jrhh1 d32c2b1 d4wemb\_ d1dsfh\_ d1op3h1 d1ce111 d1iqda1  
d1qoka1 d1qoka2 d1qfuh1 d2crya1 d1ay1h1 d1oaql\_ d3ab0b\_ d1rur11  
d1t4kb1 d1bz7b1 d1n0xh1 d1for11 d1ucbl1 d4w6yb\_ d43c9a\_ d2aab11  
d1tzia1 d4n1ca\_ d1k6qh1 d3g9ab\_ d4tvsal1 d1gmh\_ d1pz5b1 d3dx9a1  
d3wxwh\_ d1nakh1 d1kcul1 d3eaka\_ d4qlra1 d1cr911 d1d9ka\_ d1f4x11  
d1deea1 d2i27n2 d1c12a1 d2orbl1 d1j8hd1 d1mcph1 d1c5da1 d1kenh1  
d1bd2e1 d1h5ba\_ d4x7fc1 d3upaa\_ d1t3fa1 d1indh1 d2dtgc1 d4hc111  
d1zv5a1 d4wgvb\_ d1uwgl1 d4f37k1 d1aqkh1 d1vesa\_ d3zkqd\_ d1fpt11  
d1lo411 d1knob1 d3rrqa\_ d1ct8b1 d4orz\_ d1mlbb1 d4hgkc1 d1dqdl1  
d1bogb1 d4ozhe1 d1dr9a1 d1i7za1 d1dn0b1 d1kell1 d1rzib1 d1ypzf1  
d1wtla\_ d1hkfa\_ d1fail1 d1figh1 d2vyre\_ d1sjva\_ d1ohqa\_ d1bfoa1  
d1pkqb1 d1mjul1 d1b4j11 d1nsl1 d2arjb1 d1p4bh\_ d4aj0a\_ d3nn8b\_  
d2rcja1 d1f2xk\_ d4v1dd\_ d1adqh1 d2eksa\_ d4k3ga\_ d1jfqh1 d1uweh1  
d1frgh1 d4gftb\_ d1uz8b1 d4n1ea\_ d1bm311 d1clol1 d3mcka1 d2vq1a1  
d1ae6h1 d4aq1b1 d1uj3b1 d1nbqa1 d1fh511 d2ck011 d2ywza\_ d1q7211  
d4nbxb\_ d1hila1 d4hz1b1 d2j8811 d1zmya1 d1cd0a\_ d1a4ka1 d1psk11  
d1a0qh1 d4krmb\_ d1ncbh1 d2fbjh1 d1j8he1 d1i3ua\_ d1cf811 d1fe8h1  
d2p1ya1 d1eeqa\_ d2x89a\_ d1o10a\_ d2r01h1 d1ub5a1 d1dfbh1 d3eyvb1  
d4jdvb1 d4p2cg\_ d2gsia1 d2agj11 d1u3ha1 d2h1ph1 d1rih11 d1fskc1  
d1boga1 d2a7711 d1osp11 d1qfoa\_ d3dwta\_ d2fx711 d1rz711 d3stba1  
d1pkqa1 d1b6da1 d1dzba2 d1dzba1 d1kj2a\_ d4l1ha\_ d1rzgb1 d1dq1h\_  
d12e811 d1miel1 d1jmaa\_ d1sbs11 d1fgnh1 d1f5811 d1mqkh\_ d1ndgb1  
d3qeg11 d1iail1 d2aw2a1 d1tqbc1 d3fo2a1 d4dkaa\_ d1f8th1 d2g6011  
d2ywy\_ d1uj3a1 d1yc7a\_ d3bd3a\_ d4w6xb1 d1nmb1\_ d1i8ka\_ d1rj1b1  
d1ypze1 d1p7kb1 d1kxqe\_ d1gpoh1 d2z4qa1 d1w72h1 d1i9r11 d4qgya1  
d4xt1c\_ d2qqnh1 d1cica1 d3c08h1 d2cd0a\_ d2bdnh1 d1hnga1 d1mam11  
d1nldh1 d1cr9h1 d4lcih1 d3bkyh1 d3qg711 d1ai111 d1kxvc\_ d4iosd\_  
d1l7ih1 d2x1qa\_ d1ub6b1 d3k74b\_ d1libgh1 d1teth1 d1igya1 d1hxma1  
d2x6ma\_ d2e71a\_ d5e03a\_ d1qfwm\_ d2r0kh1 d1igjb1 d1rurh1 d1plgh1  
d1mj8h1 d1yuhb1 d3fmg11 d1rzfl1 d1emt11 d1ad9b1 d1igtb1 d1nlb11  
d1d5ih1 d3k7ua\_ d4ffyh\_ d1bwwa\_ d3dvga1 d1a6ta1 d1fgvl\_ d4qxgl1  
d1mim11 d1jh11\_ d2hffb1 d2hh011 d1qkzh1 d1l7t11 d1afvh1 d1iaii1

d2cjuh\_ d1um5h1 d2ghwb2 d2ghwb1 d1kgce1 d2fgwh1 dlikfh1 d1dvfd\_  
d2i24n1 d2xtjb\_ d1za3b1 d2yc1a\_ d2hh0h1 d2x1oa\_ d1bvka\_ d1rjla1  
d5e7ba1 d1igta1 d1i11b1 d2fb4l1 d1mvua\_ d1jptl1 d32c2a1 d1fvca\_  
d1iqdb1 d2hrph1 d2p4ab\_ d4qo1a\_ d1p2cb1 d1wt5c\_ d1t4ka1 d5c1mb\_  
d1it9l1 d1bz7a1 d1b2wh1 d1e4wl1 d1jn1l1 d1yedb1 d1za6b1 d3u7aa\_  
d1igfh1 d3gnml1 d1orsa1 d1wejl1 d1a2ya\_ d1hxmb1 d1gafh1 d2j4wh1  
d1pz5a1 d1j05a\_ d1a3rh1 d4fq1l1 d1qfwh\_ d1eo8h1 d1n7mh1 d4s11a\_  
d1kegh1 d5da4a\_ d1iqwl1 d3whxb1 d1vgeh1 d1deeb1 d1c12b1 d1t2ql1  
d1ad9a1 d3gsnb1 d3b2uc1 d1ggbh1 d1t3fb1 d1nakl1 d4ocmc\_ d1lila1  
d2v7hb3 d2esve1 d1mcoh1 d2qr0b1 d2q3aa\_ d1ct8a1 d1kcr11 d2pxyb\_  
d2uzih\_ d5c3ld\_ d3durb\_ d1c5cl1 d2ak4e1 d1d17h\_ d1xiwd\_ d1mlba1  
d1rmfl1 d1i7zb1 d1dlfl\_ d2xa3a\_ d5bq7b1 d1dqqb1 d3h42l1 d1legjh1  
d1kcv11 d1fe8l1 d2j6e11 d1f3rb2 d1l1k3l1 d1sm3h1 d1q0xh1 d1ghfh1  
d7fabl1 d1igch1 d1l00h1 d4idla\_ d5c2bl\_ d1jrh11 d1i11a1 d3zhda1  
d4kfzc\_ d1b0wa\_ d1e6oh1 d1mexl1 d4krpb\_ d1fnsh1 d1ncwh1 d4hgma\_  
d4eigb1 d4rzca\_ d2mpal1 d4y5xa\_ d5en2b1 d3lrga1 d4ej1c1 d1rhha1  
d1j05b\_ d1forh1 d1q9wb1 d2wzpd\_ d2aq2a1 d1h0da1 d3revb1 d2ij0c1  
d1tzh1 d4m7jl1 d1k6ql1 d3b9kc1 d1igml\_ d3qeua1 d1dsfl\_ d1celh1  
d1kcu1 d1zvha1 d1zvoa1 d1tqbb1 d1ay1l1 d2qsc11 d2cgrh1 d1n10h1  
d1ken11 d3eo0a1 d4n9ob1 d1n0xl1 d3k1kc\_ d2cqva1 d1fhga\_ d2klma\_  
d2dl2a1 d1biha3 d1biha1 d1biha4 d3qp3a1 d1glca\_ d1gxea\_ d1cvsc2  
d1cvsc1 d1xmwa2 d1m4ka2 d2otpa2 d1biha2 d1rhfa2 d2fcba2 d2fcba1  
d1wwbx\_ d1lepfa1 d1lepfa2 d2dava1 d1waaa\_ d1f97a2 d1x44a1 d1vcaa2  
d1fnla2 d1fnla1 d3b5ha2 d3h8na2 d3h8na1 d1jbja1 d1jbja2 d1pd6a\_  
d1f2qa2 d1f2qa1 d3cx2a\_ d1nbqa2 d3b5ha1 d1n26a1 d1xiwb\_ d1xaua\_  
d1fltx\_ d2ifga1 d1olla1 d1olla2 d1cs6a4 d1cs6a3 d1cs6a2 d1cs6a1  
d2gw5a2 d1sy6a1 d1xiwa\_ d1lucta2 d1lucta1 d1ry7b2 d1gl4b\_ d1qz1a3  
d1olza1 d2c9aa1 d1wwca\_ d2aq2b1 d1ck1a1 d1enfa1 d1i4pa1 d1vloa1  
d1et9a1 d1esfa1 d2g9hd1 d4ohja1 d1klud1 d1bxta1 d1eu3a1 d1ty0a1  
d1fnua1 d2qaln1 d1c4qa\_ d1prtcl d2wv6d\_ d1prtfl\_ d1l1trd\_ d4l63b1  
d1r4pb\_ d1prtd\_ d1t10f\_ d2bosa\_ d1prtb1

**Family-42 (b.82.1.2)**

**Positive dataset contains 4 protein sequences.**

d1uija1 d2v09a\_ d1uika2 d1uika1

**Negative dataset contains 4033 protein sequences.**

d1m32a\_ d1libja\_ d1iuga\_ d4q75a\_ d2bkwa1 d1t3ia\_ d1n8pa\_ d1qz9a\_  
d1j9a\_ d1leg5a\_ d1p3wa\_ d3kgwa\_ d1cl1a\_ d2ctza1 d1vjoa\_ d2rfva\_  
d1gc0a\_ d1cs1a\_ d1d2fa\_ d2ch1a1 d1qgna\_ d1pffa\_ d1elua\_ d2xlba\_  
d3m83a1 d1u08a\_ d1lc5a\_ d1b5pa\_ d2ay1a\_ d3pd6a\_ d7aata\_ d2csta\_  
d1j32a\_ d1fg7a\_ d4wlha\_ d1o4sa\_ d1v2da\_ d1gdea\_ d1m6sa\_ d1v72a1  
d1svva\_ d1ajsa\_ d1wsta1 d2f8ja2 d1l1k9a\_ d1vp4a1 d1xi9a1 d2gb3a1  
d1yaaa\_ d3i2ka1 d1lnsa3 d1mpxa2 d1xkta1 d2hfka\_ d1jmkc\_ d5d3ka\_  
d3lgia\_ d3i77a\_ d2z9ia2 d4nsva\_ d1lcya2 d4jcna\_ d1agja\_ d1os8a\_  
d1hpga\_ d1p3ca\_ d1l1ja\_ d1qtfa\_ d1ddla\_ d1e57b\_ d1auyb\_ d1f56a\_

d1bypa\_ dlazca\_ dlws8a\_ d3u25a\_ dlcuoa\_ dlid2a\_ dlrkra\_ d2iaac\_  
d4dp1x\_ dlnwpa\_ d2gima\_ d2i7sa\_ dlqhqa\_ d3ehbb1 dlfftb1 dlgyca3  
d1hfua2 d1kbva1 d1kbva2 d1sdda1 d1sdda2 dlgyca1 dlgyca2 d1mzya1  
d2bw4a1 d1aoza1 d1aoza2 d1kyaa2 d1kyaa3 d1kyaa1 d1mzya2 d4e9sa1  
d1sddb1 d1sddb2 d1hfua1 d1hfua3 d1oe1a2 d1oe1a1 d1v10a2 d1v10a3  
d1v10a1 d2dara2 d2dara1 d1wyha2 d2dloa2 d1rutx4 d1rutx3 d2cuqa2  
d1x41a2 d1x41a1 d1x3ha2 d1x3ha1 d2d8za1 d1x61a2 d1x6aa1 d1x6aa2  
d2cora2 d2cora1 d1v6ga1 d1v6ga2 d2d8za2 d1x64a1 d1x64a2 d1b8ta1  
d2co8a1 d1x63a2 d2dj7a2 d2dj7a1 d2cu8a2 d2cu8a1 dlg47a2 dlg47a1  
d1j2oa1 d1wyha1 d2dloa1 d1wiga1 d1wiga2 d2cupa2 d2cupa3 d1x68a1  
d2d8ya2 d2d8ya1 d1m3va2 d1x62a1 d1x68a2 d1x61a1 d1b8ta3 d1b8ta2  
d2d8xa2 d2d8xa1 d1x4ka1 d1x4ka2 d2cuqa1 d1m3va1 d2co8a2 d1j2oa2  
d1x63a1 d2cura1 d2cura2 d1x62a2 d2cfba1 d1dfoa\_ d1o69a\_ d1bj4a\_  
d3k28a\_ d2bwpa\_ d3lg0a\_ d2fnua\_ d3ou5a\_ d1z7da1 d1b9ha\_ d1iaya\_  
d4msoa\_ d1s0aa\_ d1sffa\_ d3tqxa\_ d1mdoa\_ d3qboa\_ d3pgya\_ d1bjna\_  
d2dkja\_ d1ejia\_ d1vefa1 d4wxga\_ d3bs8a\_ d3gbxa1 d1w23a\_ glgk9.1  
g1cp9.1 g1e3a.1 d2bema\_ d1pama1 d1ea9c1 d1qhoa1 d2fhfa2 d2fhfa1  
d1k3ia1 d1j0ha1 d1cx1a1 d2bhua1 d1edqa1 d1f1sa2 d1lut9a2 d1gvial  
d1txka1 d4alac\_ d1pjwa\_ d1s6na\_ d3uzqb\_ d1jgta2 d1ofda3 d1ea0a3  
d1q15a2 d1ct9a2 d1ao0a2 d1te5a\_ d1ex0a1 d4w9ta\_ d1jvna1 d4x2ra1  
d1ka9f\_ d4axka1 d1thfd\_ d1h5ya\_ d4u28a\_ d2y88a\_ d4wd0a\_ d1vzwa1  
d4mh8a\_ d1mu2a2 d4i7ga1 d1k9ua\_ d2opoa\_ d1au7a2 d1ic8a2 d2ovga\_  
d1sq8a\_ d1rzsa\_ d3kz3a\_ d3orca\_ d2msya\_ d2djoa1 d2r5za\_ d1au7a1  
d1f43a\_ d2lmda1 d1akhb\_ d1s7ea1 d3nara\_ d1zq3p1 d2craa1 d1mija\_  
d4uuta\_ d3a01a\_ d1x58a1 d3rkqa1 d3cmya1 d2cqa1 d2da6a1 d1e3oc1  
d1fjla\_ d1mh3a1 d1ig7a\_ d1x41a1 d1wh7a1 d1gt0c1 d2mw8a\_ d1lfup\_  
d1x2ma1 d1b72a\_ d1wi3a1 d1jgga\_ d1wjha1 d1x2na1 d1mnmc\_ d2cuea1  
d3k2aa\_ d2hosa\_ d2jwta2 d1pufa\_ d1octc1 d2hi3a\_ d1b8ia\_ d4j19a\_  
d3lnqa\_ d1wh5a1 d1b8ib\_ d1fexa\_ d2cqra1 d1guua\_ d1ug2a1 d2cqqa1  
d2ajea1 d4a69c\_ d1h8ac1 d2crga1 d2iw5b1 d1xc5a1 d1ofcx1 d2cu7a1  
d1wgxa1 d2cjja1 d2ckxa1 d1hcra\_ d1gdtal d1u78a2 d6paxa2 d1k78a1  
d1k78a2 d1xg1a1 d1hlva2 d1iufa2 d1iufa1 d2iu5a1 d1zk8a1 d2g7sa1  
d2fd5a1 d2np5a1 d1z0xa1 d2id6a1 d2d6ya1 d2i10a1 d1vi0a1 d2oi8a1  
d3c07a1 d2ns7a1 d2fq4a1 d2yvea1 d1t33a1 d2o7ta1 d1rkta1 d2np3b1  
d2g7ga1 d2gena1 d2fbqa1 d2g71a1 d2gfna1 d2g3ba1 d2jj7a1 d2hyja1  
d1sgma1 d1ui5a1 d2hkua1 d2id3a1 d4jyka1 d1b10a1 d1b10a2 d1d5ya2  
d3ubub\_ d1egia\_ d1qo3c\_ d1v7pa\_ d1tdqb\_ d3ubua\_ d1c3ab\_ d1h8ua\_  
d3bx4b\_ d1t8ca1 d1sb2a1 d1qdda\_ d2ziba1 d3cada\_ d1byfa\_ d1j34b\_  
d1jwia\_ d1jzna\_ d1c3aa\_ d1oz7b\_ d1wmza\_ d3bdwb\_ d1hq8a\_ d1fifa1  
d1dv8a\_ d3hupa\_ d1wk1a1 d1umra\_ d2afpa\_ d3bx4a\_ d1gz2a\_ d1sl6a\_  
d1v7pb\_ d3g8ka\_ d1ixxa\_ d1j34a\_ d1jwib\_ d1g1sa1 d1y17a1 d1ja3a\_  
d1fvub\_ d3bdwa\_ d1sb2b1 d1fvua\_ d1umrc\_ d1oz7a\_ d4m17a\_ d3cfwa1  
d1ypqa1 d1g1ta1 d3fd4a\_ d3l9jc\_ d4dn8a1 d1v41b\_ d2msba\_ d3lv8a\_  
d1s3ga1 d1zakal d1s4qa\_ d3tvta2 d1uf9a\_ d1khta\_ d1ckea\_ d1losna\_



d1p5zb\_ d4tmka\_ d3cm0a\_ d1tmka\_ d1jaga\_ d3h86a\_ d1t0hb\_ d1nn5a\_  
d2h92a\_ d3kb2a1 d2c95a1 d1yj5a2 d1kgda\_ d1ly1a\_ d2ak3a1 d1vyva2  
d1deka\_ d2grja1 d1p3ja1 d1y63a\_ d1e4ya1 d1s96a\_ d3iija1 d1lvga\_  
d1nksa\_ d1vyua2 d4e22a\_ d1qf9a\_ d1jjva\_ d1q3ta\_ d1ki9a\_ d1lw7a2  
d1teva\_ d1kjwa2 d1g3ma\_ d1j99a\_ d1t8ta1 d1nsta\_ d1fmja\_ d1zrha\_  
d1ls6a\_ d2a3ra\_ d1aqua\_ d2zptx\_ d3ckla\_ d1texa\_ d1q44a\_ d2gwha\_  
d1z0ja1 d3umra2 d3gj0a1 d2gaoa1 d1yzga1 d1x3sa1 d1g7sa4 d1puja\_  
d1udxa2 d1kk1a3 d2o52a\_ d1jwyb\_ d1zcaa2 d1zcba2 d2fv8a1 d2cjwa\_  
d3dz8a1 d1xzpa2 d1vg8a\_ d4qxaa\_ d2ew1a1 d1x1ra1 d2bcgy\_ d3doea1  
d3cona\_ d3rega\_ d3wyga\_ d2b6ha1 d1zd9a1 d1lnza2 d1r5ba3 d1n0ua2  
d1r2qa\_ d2f91a1 d2rhda\_ d3q3jb\_ d3q85a\_ d1efma1 d1r8qa\_ d2gf9a1  
d2akab1 d1ek0a\_ d1z08a1 d2gcoa1 d2dyl1a2 d4g01b\_ d2cxxa1 d1svia\_  
d3q72a\_ d1ni3a1 d4ac9a4 d2erxa1 d2bmea\_ d1wxqa1 d2gf0a1 d4ldja1  
d1zunb3 d1d5ca\_ d4l1v5b\_ d1efca3 d1kmqa\_ d2g6ba1 d3lrpa\_ d1tada2  
d2y8ea\_ d4rd4a1 d1z06a1 d2heia\_ d3a58b\_ d1u01a2 d1d2ea3 d1zj6a1  
d2ocba\_ d3rwoa\_ d1mr3f\_ d2e9sa1 d4u5xa1 d2iwra\_ d2fn4a1 d3bwdd\_  
d2nzja1 d2atva1 d2ksqa\_ d3l43a\_ d1mkya2 d1mkya1 d1wmsa\_ d1jnya3  
d2rmka\_ d1f6ba\_ d1f60a3 d1gota2 d1jala1 d2fh5b1 d1g16a\_ d2wblc\_  
d1m7ba\_ d1wf3a1 d1f5na2 d1t9ha2 d1z6xa1 d1z0aa1 d2fg5a1 d2a5ja1  
d2bcjq2 d1s0ua3 d1ky3a\_ d4y0va\_ d4lhwa\_ d2qmea1 d2atxa1 d1legaa1  
d1ryha\_ d1moza\_ d1nrjb\_ d2erya1 d3bfka\_ d1puia\_ d1fzqa\_ d3j3az1  
d3t5ga\_ d1shza2 d3defa\_ d2f7sa1 d3raba\_ d3tsoa\_ d3aq4a\_ d2a17a1  
d3sfva1 d3bc1a\_ d2ncda\_ d1sdma\_ d3h4sa1 d2heha\_ d2grya\_ g3kin.1  
d1kk8a2 d1br2a2 d1goja\_ d1f9va\_ d2mysa2 d1lkxa\_ d3t0qa\_ d4db1a1  
d3gbja\_ d1ry6a\_ d1v8ka\_ d1k8ka2 d1k8ka1 d3uleb1 d3i33a2 d3i33a1  
d1bupa1 d1dkgd1 d4ci6a2 d1jcf1a1 d4a2ba2 d2fxua1 d1yaga2 d1yaga1  
d4cbua2 d1bupa2 d1g99a2 d2e1za2 d2e1za1 d1saza1 d1saza2 d1lig8a1  
d1czan2 d1czan3 d1czan1 d1lig8a2 d1czan4 d1bg3a4 d1bg3a3 d1bg3a2  
d3h3no1 d3h3no2 d3ezwa2 d1zc6a1 d1zbsa1 d1zbsa2 d1zc6a2 d2ch5a2  
d2ch5a1 d1zxo2a\_ d1zxo1a\_ d1hroa\_ d4gedb\_ d3zooa\_ d1mz4a\_ d1gu2a\_  
d1f1fa\_ d1dvva\_ d1c6ra\_ d1c75a\_ d1e29a\_ d1gdva\_ d1cnoa\_ d1h32b\_  
d1co6a\_ d2bh4x\_ d2aiua\_ d5cytr\_ d1jdl1a\_ d1i8oa\_ d2zboa\_ d3dmia\_  
d1ls9a\_ d1wvec\_ d2yk3a\_ d3ph2b\_ d1dw0a\_ d5aura\_ d1ql3a\_ d1qn2a\_  
d1f1ca\_ d4zzva\_ d2xspa\_ d1eg1a\_ d4v20a\_ d1ojja\_ d4ipma1 d4csia\_  
d3pfza\_ d3ovwa\_ d2yoka\_ d2ah2a1 d1n1ta1 d1evsa\_ d1cnt1\_ d1pvhb\_  
d1z7ca\_ d1huwa\_ d1bgea\_ d1f6fa\_ d1f45b\_ d1i1rb\_ d1axia\_ d1letea\_  
d3tgxb\_ d1scfa\_ d2z3qa1 d3qb1a\_ d1hula\_ d1m48a\_ d4nkqb\_ d1leera\_  
d5e4ea\_ d2o27a\_ d3b5ka\_ d2psma1 d4zf7a\_ d3uf5a\_ d4x51a\_ d1d9ca\_  
d4ypgc1 d3oq3a\_ d1lqsl\_ d1n1fa\_ d1aula\_ d1wu3i\_ d3bes1\_ d3ux9a\_  
d2ejca\_ d3muea1 d1ihoa\_ d3q12a1 d2e17a\_ d1iq0a2 d1irxa2 d1r6ta2  
d1livsa4 d2cyba\_ d1rqga2 d1j09a2 d2yxna\_ d1f7ua2 d1h3fa1 d1ffya3  
d2g36a1 d1nzja\_ d1jila\_ d1n31a\_ d1i61a\_ d1pfva2 d1h3na3 d3n9ia\_  
d3sz3a1 d3sw2a\_ d1moxc\_ d1dx5i3 d1ledmb\_ d1aut12 d1aut11 d1nqlb\_  
d1dva11 d1szba2 d1kigl\_ d2y5f1\_ d1ijqa2 d1gk5a\_ d1g1sa2 d1nt0a3

d1xdtr\_ d1lmja2 d1lmja1 d1nzia2 d2wphe\_ d1klil\_ d1pfxl2 d1pfxl1  
d1p9ja\_ d1glta2 d1f7ea\_ d4yzub\_ d2mgpa1 d1b9wa1 d1b9wa2 d2mgpa2  
d1ob1c1 d1ob1c2 d1n1ia2 d2npra2 d2npra1 d2y5ia\_ d1qlsa\_ d1psra\_  
d3n22a\_ d2egda\_ d4ggfc\_ d2wcea\_ d2luca\_ d4aqia\_ d3nsia\_ d2lp3a\_  
d1j55a\_ d1a4pa\_ d1k8ua\_ d1nsha\_ d1lexra\_ d1tiza1 d1nyaa\_ d1ggwa\_  
d1wdcc\_ d3fwba\_ d1ggza\_ d2o5ga\_ d1ctaa\_ d1m45a\_ d3i5gc\_ d1sl8a\_  
d1fpwa\_ d2scpa\_ d2roaa\_ d4aqra\_ d3pn7b\_ d1br1b\_ d2mysb\_ d1s6ca\_  
d1bjfa\_ d2obha\_ d1jfk\_ d1jf0a\_ d1qv0a\_ d1lkja\_ d2mlfc\_ d2m97a\_  
d2d8na\_ d4by5a\_ d1jbaa\_ d4nqga\_ d1wdcb\_ d2mysc\_ d1j7qa\_ d1s6ia\_  
d1uhka2 d1r2ua\_ d1dtla\_ d3kf9a\_ d3pn7c\_ d5d67d\_ d1tuza\_ d1h8ba\_  
d1eg3a2 d2zkmx1 d1snla\_ d1gjya\_ d1y1xa\_ d1hqva\_ d1dvia\_ d1df0a1  
d1qxp2 d4us1a\_ d1k94a\_ d1sfsa\_ d1wkya2 d1uuqa\_ d3wh9a\_ d4mlra\_  
d1xyza\_ d4xuya\_ d2je8a5 d4bf7a1 d3cuia\_ d1ur4a\_ d1qw9a2 d1odza\_  
d2vzsa5 d1bqca\_ d2x2ya1 d1hjqa\_ d1qnra\_ d4y7ea1 d1vjza\_ d4k68a\_  
d2v3ga\_ d4hpga\_ d1nofa2 d1nq6a\_ d1h4pa\_ d1aq0a\_ d3ziza\_ d4bs0a\_  
d1ecea\_ d1h1na\_ d1ta3b\_ d1w91a2 d1ilwa\_ d1uhva2 d1us3a2 d1egza\_  
d7a3ha\_ d1tvna1 d3nyda1 d1ghsa\_ d2cyga1 d4xv0a\_ d2c8na2 d1w32a\_  
d3emca\_ d1v6ya1 d1foba\_ d2uwfa1 d2fgla\_ d3niya1 d2c0ha1 d1rh9a1  
d1yq2a5 d1szna2 d1fa2a\_ d1pama4 d5do8a1 d1ea9c3 d1hx0a2 d2fhfa5  
d1qhoa4 d1m53a2 d4m8ua1 d2gjpa2 d1lwha2 d4howa1 d1ktba2 d1j0ha3  
d3vm5a1 d2x1ia\_ d1wzaa2 d1uasa2 d2diea1 d1mxga2 d1ht6a2 d1eswa\_  
d1iv8a2 d5cpsa\_ d1ud2a2 d1zjaa1 d3gbea1 d1kwa2 d1wdpa\_ d1gcya2  
d1g5aa2 d1hvxa2 d3dhpa2 d2bhua3 d4do4a1 d3qgva1 d1e43a2 d1g94a2  
d2d3na2 d1gjwa2 d1gvia3 d1x1na1 d1r7aa2 d1tz7a1 d4c7ga2 d2gjxa1  
d1nowa1 d1jaka1 d1yhta1 d3wdpp1 d3wq5a\_ d1gnxa\_ d4gxp2 d4hz8a\_  
d1e4mm\_ d3aiua\_ d1wcca1 d1qvba\_ d3ahxa\_ d1v02a\_ d2dgaa\_ d1pbga\_  
d1vffa1 d1qoxa\_ d4ha4a\_ d1t77a2 d1mxa2 d1e5wa2 d1j19a2 d1isna2  
d2a16b2 d3syxa1 d1mkea1 d2p8va\_ d1xoda1 d1i7aa\_ d1evha\_ d1egxa\_  
d1b9ra\_ d1offa\_ d1frra\_ d3wcqa\_ d1e9ma\_ d1l5pa\_ d1wria\_ d1i7ha\_  
d3av8a\_ d1czpa\_ d1rfka\_ d3p1ma1 d3b2ga\_ d2bt6a2 d1wgqa1 d1v89a1  
d2coda1 d1zc3b\_ d1wg7a1 d1u5ea1 d1v61a1 d2coca1 d2ys1a1 d1v5pa1  
d1ntya2 d1wjma1 d1wila1 d1u29a\_ d1xx0a1 d1unqa\_ d2zkmx3 d1fhoa\_  
d1v88a1 d2adza1 d1x1fa1 d1p6sa\_ d2coaa1 d1btka\_ d1v5ma1 d1faoa\_  
d2x18a\_ d1dyna\_ d1x1ga1 d4kaxb\_ d2j59m1 d1kilb2 d1xcga2 d1txda2  
d1u5da1 d1dbha2 d1wlha\_ d1upqa\_ d1v5ua1 d2fjla1 d1eaza\_ d2dfka2  
d2cofa1 d1kz7a2 d9ldta1 d2ewda3 d1up7a1 d2dfda1 d1s6ya1 d1vjta1  
d7mdha1 d1hyea1 d1t2da1 d1ojsa3 d1b8pa1 d1ldna1 d1hyha1 d1civa1  
d2a92a1 d1ez4a1 d1i0za1 d1y6ja1 d1gv0a1 d1ur5a1 d1llda1 d1obba1  
d1v8ba1 d1gdha1 d2dlda1 d1mx3a1 d1ygya1 d1qp8a1 d1li4a1 d1j4aa1  
d2naca1 d1npya1 d3t4ea2 d1a4ia1 d1o0sa1 d2hk9a2 d2egga2 d1b26a1  
d1bvua1 d1gq2a1 d1c1da1 d1leha1 d1gtma1 d1euza1 d1nvt1 d3dona2  
d1ledza1 d1vi2a1 d1p77a1 d1nyta1 d1b0aa1 d1vl6a1 d1v9la1 d1txga2  
d3f47a1 d1mv8a2 d2pv7a2 d1xc2a3 d2ahra2 d4xiya1 d2f1ka2 d1pgja2  
d1i36a2 d1np3a2 d1lj8a4 d1teaa3 d1qmg2 d2i76a2 d2g5ca2 d1wdka3

d1dlja2 d3cuma3 d1kola2 d1f8fa2 d1qora2 d1jqba2 d1vj0a2 d1cdoa2  
d1gu7a2 d1d1ta2 d1xa0a2 d2dm6a2 d1jvba2 d1rjwa2 d1llua2 d1tt7a2  
d1piwa2 d1o89a2 d1iz0a2 d1e3ja2 d1yb5a2 d1uufa2 d1vj1a2 d1e3ia2  
d3gpdg1 d1vc2a1 d2nvwa1 d1u8fo1 d1ydwa1 d1hdgo1 d2g17a1 d1cf2o1  
d2czca2 d1r0ka2 d1obfo1 d2cvoa1 d1ebfa1 d1h6da1 d1i32a1 d1zh8a1  
d2q49a1 d1qkia1 d1j5pa4 d3pzra1 d1xeea1 d1vkoa1 d1vm6a3 d3qvsa1  
d2pkqo1 d1b7go1 d1gr0a1 d1p1ja1 d1lc0a1 d1j0xo1 d3pwka1 d2hjsa1  
d1zyao1 d1vkna1 d1t1ta1 d1nvmb1 d3sjua\_ d3ojfa1 d1xu9a1 d2jjya1  
d1n7ha\_ d1y1pa1 d1h5qa\_ d1jtva\_ d4fs3a\_ d2bkaa1 d1gy8a\_ d2c5aa1  
d1ulsa\_ d1ooea\_ d2b69a1 d1y5ma1 d1spxa\_ d1aela\_ d1bxka\_ d1ydea1  
d1gega\_ d1hdoa\_ d1o5ia\_ d1e6ua\_ d1snya1 d2rhca\_ d3zv4a\_ d5ceja\_  
d2d1ya1 d1fjha\_ d3w8ea\_ d2fmua1 d1x1ta\_ d1rpna\_ d3ay7a1 d1k2wa\_  
d1eq2a\_ d2hrba1 d3ruaa\_ d2ew8a1 d4hwka\_ d1xgka\_ d2bd0a1 d1yo6a1  
d2a35a1 d2ntva\_ d1vl8a\_ d1hdca\_ d4bkua\_ d2ag5a1 d2q45a\_ d1nffa\_  
d4iy1a\_ d1zbqa1 d1kewa\_ d1ek6a\_ d1ja9a\_ d2q46a2 d1iy8a\_ d1cyda\_  
d2ptga\_ d1hxha\_ d1uzma1 d3lyla\_ d4m89a\_ d3wyea\_ d2b1la1 d1w6ua\_  
d1sb8a\_ d2q2va\_ d4nr0a\_ d1e6wa\_ d2gasa\_ d3oiga1 d2bgka1 d1mxha\_  
d1vl0a1 d1rkxa\_ d1r6da\_ d1wmaa1 d1e7wa\_ d2c07a1 d1xkqa\_ d3tzha\_  
d1g0oa\_ d3lz6a\_ d1qyca\_ d1ledoa\_ d1gz6a\_ d1oc2a\_ d1t2aa\_ d1zema1  
d2xoxa\_ d1z45a2 d1geea\_ d1p33a\_ d3lt0a\_ d4e6pa\_ d2wyua\_ d1db3a\_  
d4q9na\_ d1xhla\_ d4o1ma\_ d1fmca\_ d2uvda\_ d2gdza1 d1uaya\_ d2z1ma\_  
d2o23a2 d2fr1a2 d2fr1a1 d1qsga\_ d1qyda\_ d4zjua\_ d2a4ka1 d1yb1a\_  
d1wvga1 d1yxma1 d3f4ba\_ d1mg5a\_ d1xg5a1 d1r55a1 d3gboa\_ d1atla\_  
d1buda\_ d4q1la\_ d1quaa\_ d1yp1a\_ d1wnia\_ d3nqyb\_ d4gera\_ d1bqba\_  
d1ex0a4 d2f4ma1 d1x3za\_ d3ulra1 d1g9ka2 d1kapp2 d1k7ia2 d3ioqa\_  
d1fh0a\_ d1o0ea\_ d1khqa\_ d1m6da\_ d2cb5a\_ d1cs8a\_ g8pch.1 d2pnsa\_  
d1vsna1 d1mira\_ d1iwda\_ d2oula\_ d7pcka\_ d3bwka\_ d3bcna\_ d2p86a\_  
d1pvja\_ d1pcia\_ d1gece\_ d1deua\_ d4bs6a\_ d1xkga1 d1cqda\_ d1jqpa2  
d2c0ya\_ d2bdza\_ d3p5ua\_ d2o36a\_ d1zoya1 d1qo8a2 d1d4ca2 d1chua2  
d1jnra2 d1kf6a2 d2jk6a2 d2jk6a1 d1feca1 d1feca2 d1lpfa1 d1lpfa2  
d1xhca1 d1xhca2 d1dxla2 d1dxla1 d1gera2 d1m6ia2 d1onfa1 d1onfa2  
d3lada2 d3lada1 d1w4xa1 d1w4xa2 d1gesa2 d1mo9a1 d1xdia1 d1fl2a2  
d1fl2a1 d1fcda1 d1fcda2 d1h6va2 d1h6va1 d1mo9a2 d1gv4a2 d1gv4a1  
d2gv8a2 d2gv8a1 d1aoga1 d1aoga2 d1hyua1 d1ebda1 d1ebda2 d3dk9a1  
d1q1ra2 d1q1ra1 d1gesa1 d1zbfa1 d2z1ha\_ d2etja1 d3qioa1 d1jl1a\_  
d2e41a\_ d1jl2a\_ d2lsna1 d1lio2a\_ d1uaxa\_ d2yv0x\_ d1mu2a1 d1lekea\_  
d1i39a\_ d1ps9a2 d1o94a2 d1cjca1 d1pn0a1 d1reoa1 d1ju2a1 d2f5va1  
d3c96a1 d2gmha1 d1pj5a2 d1gpea1 d1o5wa1 d1n4wa1 d1k0ia1 d2dw4a2  
d2ivda1 d2voua1 d1kdga1 d1s5ja1 d2hbja2 d2igia\_ d1wlja\_ d1qhta1  
d4dlea1 d1tgoa1 d2f96a1 d3tr8a1 d3mxma\_ d1q8ia1 d1y97a1 d1w0ha\_  
d1kfsa1 d2py5a1 d1noya\_ d1d5aa1 d1yt3a3 d2guia\_ d3mwpa1 d4kb1a\_  
d1liv0a\_ d1nu0a\_ d2d5ra1 d1iuka\_ d2csua1 d3q9ub\_ d2yv1a1 d3q9na\_  
d2d59a\_ d1oi7a1 d2yv2a1 d1euca1 d1y81a1 d3nvva1 d1krha3 d2h88b1  
d1n62a2 d1t3qa2 d1kf6b2 d1zoyb1 d1ffva2 d1dgja2 d1rm6c2 d1jmxal

d1pbya1 d1pbya2 d1r7ha\_ d1faaa\_ d1wika1 d1xfla\_ d1ttza1 d2f51a1  
d1ti3a\_ d1nhoa\_ d1sena\_ d2i4aa\_ d1lep7a\_ d1zmaa1 d1fo5a\_ d3lefa1  
d3diea1 d2yana1 d1z6na1 d1oaza\_ d3zywa1 d4aj8a\_ d1nm3a1 d4fiwa\_  
d1wmja\_ d4hs1a1 d1liloa\_ d1xwaa1 d1wjka1 d2vm1a\_ d1fb6a\_ d1gh2a\_  
d1h75a\_ d1nw2a\_ d1kx5b\_ d3a6na\_ d4m6ba2 d2nqbd\_ d3wkjd\_ d2yfwe\_  
d4h9na\_ d5bnxa\_ d1kx5c\_ d3r45a\_ d1eqzb\_ d4jjnb\_ d1f66c\_ d1eqza\_  
d4wnnb\_ d1kx5a\_ d1u35c1 d1id3a\_ d2nqbc\_ d1kx5d\_ d1ku5a\_ d1f1ea\_  
d1b67a\_ d1tafa\_ d1tafb\_ d1jfib\_ d1q9ca\_ d1h3ob\_ d2byka1 d1n1ja\_  
d4g92b\_ d1bh9a\_ d1jfia\_ d1h3oa\_ d2bykb1 d1n1jb\_ d1pd212 d1nhya2  
d2a2ra2 d1k0dd2 d1f2ea2 d1gsua2 d1f3ba2 d2fhea2 d2pvqa1 d1tw9a2  
d1oyja2 d1e6ba2 d3ik7a1 d4is0a1 d1r5aa2 d1jlva2 d1m0ua2 d3gtub2  
d1z9ha2 d1okta2 d1axda2 d2gsra2 d1tu7a2 d1k3ya2 d1zgma1 d1b48a2  
d1gnwa2 d1gwca2 d2gsta2 d1glqa2 d1oe8a2 d1pn9a2 d1v2aa2 d1fw1a2  
d1duga2 d3vrda1 d3vrda2 d1fcdc2 d1fcdc1 d1h1oa2 d1h1oa1 d1m70a2  
d1nira1 d1qksa1 d1qsaa2 d1qqya\_ d1gd6a\_ d1f6ra\_ d1ivma\_ d2gv0a\_  
d1iiza\_ d2z2fa\_ d1j8xa\_ d1ghla\_ d1b9oa\_ d1741a\_ d1691a\_ d2o4wa\_  
d1p37a\_ d1k28a3 d1xjta1 d1jtma\_ d2f2qa\_ d4e97a1 d3w3ea\_ d4tx7a\_  
d3cq1a\_ d4msta\_ d3iwra\_ d1dxja\_ d2z37a\_ d4dyga\_ d2za0a\_ d2c21a1  
d1f9za\_ d2pjsa1 d1k11a\_ d2i7ra1 d1ecsa\_ d1xqaa1 d5cj3a1 d1jifa\_  
d2p7oa\_ d1r9ca\_ d1nkia\_ d1etob\_ d1umqa\_ d1g2ha\_ d2beia1 d4m3sa\_  
d1u6ma1 d1ygha\_ d1yk3a1 d3dr6a\_ d1xmta\_ d1z4ea1 d2ge3a1 d1bo4a\_  
d2fiaa1 d2jdca1 d1y9wa1 d3to7a\_ d1wwza1 d2fl4a1 d2ozua1 d2b5ga\_  
d2cy2a1 d2p0wa\_ d1cm0a\_ d4pswa\_ d1yrea1 d1yr0a1 d1m4ia\_ d2gana1  
d1yvka1 d1ghea\_ d2g3aa1 d1y7ra1 d2euia1 d1q2ya\_ d2fsra1 d1xeba\_  
d2ae6a1 d1cjwa\_ d1qsma\_ d2aj6a1 d1y9ka1 d1i12a\_ d1vkca\_ d2atra1  
d1n71a\_ d2d4pa1 d2fiwa1 d2fe7a1 d1tiqa1 d2ou2a\_ d1yx0a1 d2fcka1  
d1p0ha\_ d2j8ma\_ d2pq8a\_ d1z4ra1 d1s3za1 d1ufha\_ d1xvqa1 d1pn0a2  
d3hy2a\_ d2cvba1 d1o8xa\_ d1lu4a\_ d1we0a1 d2bmxa1 d2a4va1 d1psqa\_  
d1xiya1 d1q98a\_ d1n8ja\_ d1zofa1 d2ggta\_ d3tjja\_ d4je1a1 d3s9fa\_  
d2zcta\_ d1qmva\_ d1jfua\_ d2b1ka\_ d5dvba1 d2b5xa1 d2v2ga\_ d1st9a\_  
d3tb2a\_ d411ra\_ d4fh8a1 d1e2ya\_ d1knga\_ d2h30a\_ d1i5ga\_ d2z9sa\_  
d2f8aa1 d1tp9a1 d2b7ka\_ d1nm3a2 d3hvva\_ d2wfca1 d4kcea\_ d1xvwa1  
d4gqca1 d3qpma\_ d4k1fa\_ d1zzoa1 d1gp1a\_ d1prxa\_ d1rmka\_ d1ixta\_  
d1eyoa\_ d1cnna\_ d1fu3a\_ d1glpa\_ d1f3ka\_ d1fyga\_ d2m5ta\_ d1cqqa\_  
d1wqsa\_ d5bpea\_ d2ipha\_ d1lvoa\_ d2bhga1 d3tnta\_ d3sjia\_ d3d23a1  
d2fyqa\_ d3tloa\_ d3zvea1 d2hrva\_ d3q3ya1 d4asha1 d1e88a1 d1l6ja5  
d1l6ja4 d1eaka4 d1l6ja3 d1h8pa2 d1h8pa1 d1etha2 d1w52x1 d2ppla1  
d1hpla2 d1lpbb2 d2oxea1 d1bu8a2 d1rpla2 d1ysl1x\_ d4hs9a\_ d1ispa\_  
d1ex9a\_ d1ku0a\_ d3qmma\_ d1lgya\_ d4l3wa\_ d1llfa\_ d1lukca\_ d1cr6a2  
d1svpa\_ d1mbma\_ d3su6a1 d1cu1a1 d4agka\_ d1vcpa\_ d1q31a\_ g1n11.1  
d3e90b\_ d1ep5a\_ d3u1jb\_ d4qmea2 d2xdta2 d1z5ha2 d3zxha\_ d1cgl1a\_  
d1rm8a\_ d1eaka2 d2jsda\_ d1cxva\_ d1hv5a\_ d1i76a\_ d3p0ya1 d1igra1  
d1igra2 d1n8yc2 d1m6ba2 d1m6ba1 d1m41a\_ d2bk7a\_ d3fjua\_ d1z5ra1  
d1kwma1 d1uwya2 d1jqga1 d2c1ca1 d1dtda\_ d1h81a2 d2tbvc\_ d1c8nc\_

d1x36a\_ d1smvc\_ d1ng0c\_ d4sbvc\_ d1lopa\_ d1f2nc\_ d1cixa\_ d1y29a\_  
d1v7fa\_ d2jtba\_ d1g9pa\_ d1lupa\_ d1qk7a\_ d1mb6a\_ d2a2va\_ d1niya\_  
d1i25a\_ d1hvwa\_ d2mpqa\_ d1ie6a\_ d1kqha\_ d1la4a\_ d2mxoa1 d1d10a\_  
d1koza\_ d1qk6a\_ d1emxa\_ d1lqra\_ d1c6wa\_ d3ljqa\_ g1k2x.1 d1rypd\_  
d1lrua\_ d1rypc\_ d3unfk\_ d1rypa\_ d1j2pa\_ d1lrua\_ d1j2qh\_ d3unfh\_  
d1m4ya\_ d1rypb\_ d1lru1\_ d1lru2\_ d1lru2\_ d1q5rh\_ d1rypg\_ d1g3ka\_  
d1lru1\_ d1q5qa\_ d1e94a\_ d1lru1\_ d1lryph\_ d3ty6a\_ d1lru1\_ d1lru1\_  
d1rype\_ d1lru1\_ d1lru1\_ d3mi01\_ d1lryph\_ d2z3ba\_ d1lru1\_ d3mka2\_  
d1lru1\_ d1ny721 d1ny722 d1a6ca3 d1a6ca2 d1a6ca1 d1pgl22 d1pgl21  
d1pgl11 d1ny711 d1mqta\_ d1d4m3\_ d1fmd3\_ d2mev1\_ g1aym.1 d1ev13\_  
d4q4w1\_ d1r1a3\_ d2x5ia\_ d1rhi1\_ g1r1a.1 g1d4m.1 d1b35b\_ d1lopa\_  
d1tme1\_ d4iv1a\_ g1pvc.1 g1fpn.1 d1fpn1\_ d4gb31\_ d1d4m1\_ d1fmd1\_  
d1ev11\_ d2wzr3\_ g1cov.1 d1qqp3\_ g1fmd.1 d2x5ic\_ d1rhi3\_ g1oop.1  
d1hxs1\_ g1hxs.1 d1fpn3\_ d1bev1\_ g2mev.1 d1eah3\_ d1aym1\_ d1pvc3\_  
d1qqp1\_ d1zba3\_ d1h8ta\_ d3vbhc\_ g1b35.1 g1bev.1 d1hxs3\_ g1ev1.1  
d1bev3\_ g1tmf.1 d1tmf1\_ d1b35a\_ d2mev3\_ g1eah.1 g1h8t.1 d1eah1\_  
d4q4w3\_ d1r1a1\_ d1aym3\_ d1pvc1\_ d1zba1\_ d1h8tc\_ d1loopc\_ d1tme3\_  
g1qqp.1 d4iv1c\_ g1tme.1 d1p8ba\_ d1eixa\_ d3exra\_ d2ffca1 d2fda1  
d3n3ma1 d2czda\_ d1q6oa\_ d2yyua\_ d1vqta1 d1dbta\_ d3ldva1 d2flia1  
d1rpxa\_ d1tqja\_ d1tqxa\_ d1ux8a\_ d1dlya\_ d4i0va\_ d2bkma\_ d1dlwa\_  
d2bmma\_ d2r80b\_ d1cqxa1 d1cg5a\_ d1gcvb\_ d3boma\_ d2h8fb\_ d2raoa\_  
d3bj1a\_ d4hrrb\_ d2r50a\_ d3d1kb\_ d2aa1b1 d3zhwa\_ d3hf4b\_ d3gdja\_  
d1jebb\_ d3bj1b\_ d1x9fb\_ d1wmub\_ d1gcva\_ d3bcqb\_ d3d4xb\_ d2dc3a\_  
d3hf4a\_ d4yu3a\_ d3k8ba\_ d1qpwb\_ d2r80a\_ d3bcqa\_ d1v4wa\_ d3wtgb\_  
d1j17a\_ d4esaa\_ d1a9we\_ d3d1ab\_ d1fsla\_ d4h21a\_ d1v4wb\_ d1mwca\_  
d1vhba\_ d1jeba\_ d1spgb\_ d1h97a\_ d1q1fa\_ d1tu9a1 d3d1aa\_ d1hdsb\_  
d3hyub\_ d2zfbb\_ d3fs4a\_ d1oj6a\_ d1shrb\_ d4h21b\_ d4yu3b\_ d1spga\_  
d3hrwa\_ d3qqra\_ d3at5a\_ d4wchd\_ d3hyua\_ d1cg5b\_ d1uc3a\_ d1hbra\_  
d2raob\_ d1outb\_ d4esab\_ d3gdjb\_ d3qqqa\_ d1x9fc\_ d3vrfa\_ d1litha\_  
d3mkba\_ d3d4xa\_ d3mjpa\_ d1j16a\_ d3fh9a\_ d1outa\_ d2dc3b\_ d1lit2a\_  
d3eoka\_ d3g46a\_ d1qpwa\_ d3vrfb\_ d1ch4a\_ d1x9fd\_ d1hdsa\_ d2zfba\_  
d3mkbb\_ d1or4a\_ d3wtga\_ d1a4fa\_ d3fh9b\_ d3bomb\_ d3cy5a\_ d3at5b\_  
d1x9fa\_ d2oifa\_ d4lmbx\_ d1cpcb\_ d3v57a\_ d1kn1a\_ d1cpc\_ d4f0ta\_  
d2vjha\_ d4po5b\_ d1eyxa\_ d4f0tb\_ d1b33b\_ d1b8db\_ d4h0mb\_ d1b33a\_  
d2vjhb\_ d4lm6b\_ d2vmlb\_ d1a11b\_ d2vjta\_ d3dbja\_ d2vmla\_ d2vjtb\_  
d4f0ub\_ d1f99b\_ d4rmpa1 d1liaa\_ d1eyxb\_ d2uulb\_ d4lmsb\_ d4f0ua\_  
d2bv8a\_ d1f99a\_ d2bv8b\_ d2c71b\_ d3dbjb\_ d4rmpb1 d1b8da\_ d4h0ma\_  
d3v57b\_ d1kn1b\_ d1liab\_ d2uula\_ d2j96a\_ d1pjqa1 d3ia2a\_ d4dgqa1  
d1hkha\_ d1zoia\_ d1mtza\_ d2xqfa\_ d1ea5a\_ d1f6wa\_ d1dx4a\_ d1qe3a\_  
d1k4ya\_ d4qwwa\_ d2ha2a\_ d2i49a\_ d1nnfa\_ d1xvxa\_ d1lursa\_ d1h3da1  
d1iuda\_ d4m1va1 d1twya\_ d3e13x\_ d2nxoa1 d4pfua\_ d3ttma\_ d1elja\_  
d2qmwa1 d1us5a\_ d1y3na1 d1jeta\_ d1uqwa\_ d4f19a1 d2esna2 d3thia\_  
d3fasa1 d2uyeb\_ d2xwva1 d1r91a\_ d2fyia1 d1pb7a\_ d2ozza1 d1sw5a\_  
d1nh8a1 d1vr5a1 d2g29a\_ d1xs5a\_ d3lswa\_ d2z23a\_ d3w9va\_ d3tcha\_

d1q35a\_ d1z7me1 d3q27a\_ d1p99a\_ d1ve4a1 d2i6ea1 d4mcoa1 d4n8ya\_  
d1eu8a\_ d1zbma1 d1hsla\_ d1ixca2 d1jl1na\_ d1xvya\_ d1y9ua\_ d2z22a1  
d1xoca1 d4oera\_ d1wdna\_ d5f1qa1 d1xt8a1 d4gwoa\_ d4igta1 d1pc3a\_  
d4mmpa1 d1o63a\_ d2cz1a1 d2onsa2 d4mija1 d1jmxa4 d1pbya3 d1pbya4  
d4iuaa3 d4bvva\_ d5hpga\_ d3k65a\_ d1ki0a3 d1ki0a1 d1a0ha1 d1pmla\_  
d3sp8a3 d2feba1 d1f74a\_ d3l21a\_ d2e1da\_ d1to3a1 d1w3ia\_ d1sf1a\_  
d1n7ka\_ d1vcva1 d4imea\_ d1wa3a\_ d2ocza1 d1f2ja\_ d3m16a\_ d2yxga\_  
d1ub3a\_ d3a5fa\_ d1fbaa\_ d1l6wa\_ d1xfba1 d1wx0a1 d1vpxa1 d1ojxa\_  
d1mxsa\_ d2a4aa1 d1xkya1 d3cq0a1 d3s1xa\_ d1f05a\_ d1fdja\_ d3cpra1  
d4d2ja\_ d1cg2a1 d1yloa2 d1y7ea2 d1y0ya3 d1vixa1 d1fnoa4 d1vhoa2  
d1ysja1 d1vhea2 d1z21a1 d2fvga2 d1vgya1 d1r3na1 d2grea2 d1xmba1  
g1q7l.1 d1rtqa\_ d3rp2a\_ g1lucy.1 d1fuja\_ d2zchp\_ d3w94a\_ d1si5h\_  
d1l06a\_ g2pka.1 d1cgha\_ d1kigh\_ d1a5ia\_ d3s9ba\_ d1hj8a\_ d1ao5a\_  
d2anya\_ d1q3xa1 d1gvza\_ d1azza\_ d4gsoa\_ d2f91a1 d1iaua\_ d1gdna\_  
d1eufa\_ g1fiw.1 d1eq9a\_ d4nfea\_ d2rdla\_ d1spja\_ d1elva1 d1a7sa\_  
d1ekbb\_ d1pfxc\_ d1yc0a\_ d2aiqa\_ g1fiz.1 d1fi8a\_ d4k60a\_ d4dgja\_  
d1mzaa\_ d1op0a\_ d3tjva\_ d1pytd\_ d1sgfg\_ g1gg6.1 d2eeka\_ g1rtf.1  
d1a0ja\_ d3g01a\_ d1pytc\_ d4e7na\_ d1ddja\_ d1z8ga1 d2hlca\_ d1npma\_  
d1brup\_ g1jou.1 d1sgfa\_ d1autc\_ g2hnt.1 g1kdq.1 d1orfa\_ d3s69a\_  
d4crga\_ d1fxya\_ d1bqya\_ d2ftba\_ d1pmpa\_ d2rcqa1 d1fdqa\_ d4lkpa\_  
d1sa8a\_ d1vyfa\_ d1lpja\_ d3vg7a1 d4azqa1 d1o8va\_ d5bvqa\_ d1p6pa\_  
d2qo4a\_ d1opba\_ d1yiva1 d1o1va\_ d4bvma1 d4tkba\_ d4i3ba\_ d1bwya\_  
d1ftpa\_ d1gg1a\_ d4gkca\_ d1cbia\_ d3p6da1 d1kqwa\_ d2a0aa1 d1jx4a2  
d3gv5b1 d1t94a2 d3bq0a2 d1e69a\_ d1mv5a\_ d3g60a4 g1ii8.1 d1ewqa2  
d1ji0a\_ d1qhla\_ d1v43a3 d2wmfa1 d1vpla\_ d1g2912 d4a82a2 g1f2t.1  
d2d62a1 d3tuic1 d2bbsa1 d3g60a3 d2ixea\_ d1g6ha\_ d1sgwa1 d2qi9c\_  
d3r1fa1 d3b60a1 d3d31a2 d2pzea1 g1xew.1 d1jj7a\_ d1oxxk2 d2onka1  
d1w1wa\_ d1iwea\_ d1qf5a\_ d1vmaa2 d1nija1 d1np6a\_ d2p67a1 d3ihla\_  
d1okkd2 d1l1s1a2 d1s1ma2 d1liona\_ d2v40a\_ d1dj3a\_ d3hida\_ d2vo1a1  
d2g0ta1 d1vcoa2 d1j8mf2 d1g3qa\_ d1xjca\_ d1p9ba\_ d1qzxa3 d1ihua2  
d1ihua1 d2qm8a\_ d1dj2a\_ d4ioja\_ d1cp2a\_ d1yrba2 d3gqba2 d1skye3  
d1xp8a1 d1tf7a2 d1tf7a1 d1ye8a1 d1skyb3 d2qe7d2 d4blta\_ d4huta\_  
d3l1daa2 d4hyya\_ d2i3ba1 d1cr1a\_ d3j9tb2 d3ntua2 d1vdza1 d2z43a\_  
d1e9ra\_ d1nlfa\_ d3ziaa2 d1n0wa\_ d1g6oa\_ d3ziad2 d3j9ta2 d1pzna2  
d3gqbb2 d1gkub1 d1gkub2 d1eh3a\_ d3skpa\_ d1dtza1 d1dtza2 d1ieja\_  
d1jnf2a1 d1ce2a1 d1jnfa1 d1b1xa2 d1b1xa1 d1jw1a1 d1jw1a2 d1ryoa\_  
d1h76a1 d1h76a2 d1c4oa1 d2p6ra3 d2p6ra4 d1oywa2 d1oywa3 d1wrba1  
d1w36b2 d1w36b1 d1c4oa2 d3bora\_ d1t6na\_ d2eyqa5 d2eyqa3 d2eyqa2  
d2zu6a2 d1veca\_ d1uaaa1 d1w36d1 d2g9na1 d1z3ix2 d2rb4a\_ d1hv8a1  
d1hv8a2 d1t5ia\_ d1w36c2 d2j0sa2 d2j0sa1 d1fuka\_ d3hjha1 d1z5za1  
d1z63a1 d1s2ma2 d1s2ma1 d1wp9a1 d1wp9a2 d1gm5a3 d1gm5a4 d3dina4  
d3dina3 d1q0ua\_ d1w36c1 d1z3ix1 d1nkta3 d1nkta4 d1uaaa2 d1w36d2  
g1qhh.1 d2fwra2 d2fwra1 d3q3ma\_ d1za0a1 d1mxra\_ d2inca\_ d1jk0a\_  
d2incb\_ d1mhyb\_ d3hf1b\_ d1mtyb\_ d1r2fa\_ d2uw1a\_ d1mhyd\_ d3n37a\_

d1afra\_ dloquc\_ dlsyya\_ dlmytd\_ d2o1za\_ dluzra\_ d1smsa\_ d2fkza\_  
d1zujal d1s3qa1 d2fjca1 d1z6om1 d1veia\_ d4dyya\_ d3gvya\_ d2pyba\_  
d4cy9a1 d3bvfa1 d1r03a\_ d2cf7a\_ d1nf4a\_ d1zs3a1 d4iwka\_ d3ka8a\_  
d3np0x\_ d1n1qa\_ d11b3a\_ d4e6ka\_ d1z6oa1 d2fzfa1 d4dyua\_ d3ge4a\_  
d1jgca\_ d4am4a\_ d2z6ma\_ d1ji5a\_ d1vlga\_ d1lkoa1 d1krqa\_ d3qz3a\_  
d1o9ra\_ d2ffxj\_ d1euma\_ d1yv1a1 d2v2pa\_ d1j30a\_ d4di0a\_ d1dpsa\_  
d2cbia2 d1gqia1 d2choa2 d1oewa\_ d2qzxa\_ d2asia\_ d1psoe\_ d1miqa\_  
d1smra\_ d2h6ta\_ d1pfza\_ d1lizda\_ d3hd8a\_ d1j71a\_ d1dpja\_ d4aa9a\_  
d1t6ex\_ g1b5f.1 g1lya.1 g1htr.1 d1qdma2 d1bxoa\_ d1wkra\_ d1tzsa\_  
d1libqa\_ d2qzwa\_ d1ex4a2 d1c6va\_ d2v76a\_ d1wj1a1 d1aqca\_ d1qqga2  
d1qqga1 d1ntva\_ d1n3ha\_ d4dbba\_ d3f0wa1 d1p3ra\_ d1wgua1 d2cy4a1  
d3hqca\_ d1wvha1 d1xr0b1 d1bdqa\_ d3ggta\_ d3ixoa\_ d1mrxa\_ d2haha\_  
d1tw7a\_ d4njsa\_ d1sgua\_ d2p3da\_ d1nsoa\_ d3d3ta\_ d2rkfa\_ d1c6ya\_  
d2rspa\_ d3ogpa\_ d3ekwa\_ d2o4na\_ d2j9ja\_ d1baia\_ d3ggua\_ d3lzua\_  
d4npua\_ d4j55a\_ d2r8na\_ d2fxda\_ d2p3ca\_ d4dqa\_ d3ttpa\_ d3t3ca\_  
d2p3aa\_ d2hc0a\_ d2fdda\_ d3mwsa\_ d1k8rb\_ d1wgra1 d1ef5a\_ d1wfyal  
d1e8ya3 d1wgya1 d1l1fda\_ d2cs4a1 d1wxma1 d2byea1 d3kh0a1 d2byfal  
d1wxaa1 d1wgda1 d1wggal d4q5eb\_ d1wjna1 d1se9a\_ d3n3kb\_ d1wz0a1  
d1we6a1 d2m0xa\_ d2gbka\_ d3rt3b1 d1wh3a1 d1sifa\_ d2ekek2 d4ii2b1  
d4hk2a1 d1c3ta\_ d1m94a\_ d1wgha1 d1ttna1 d1j8ca\_ d1wx8a1 d3v6cb1  
d2ma9b\_ d4i61b1 d1bt0a\_ d2jvca1 d2k1fa\_ d1wxva1 d1wf9a1 d1t0ya\_  
d2io0b2 d1x1ma1 d2gbma\_ d1zw7a1 d2m17a\_ d1ud7a\_ d1we7a1 d2lwpal  
d2gbja\_ d1wjua1 d1v6ea1 d1v86a1 d4eewa\_ d1wiaa1 d4icva\_ d4gu2a\_  
d1wx7a1 d1wy8a1 d4hjkal d2faza1 d1v5oa1 d3ruib\_ d1eo6a\_ d3waob\_  
d2r2qa1 d3m95a\_ d3wana\_ d3ubra\_ d1qo8a1 d1d4ca1 d2k3va\_ d1ft5a\_  
d1qdba\_ d1m1qa\_ d2j7aa\_ d1ogyb\_ d4fasa\_ d1jnia\_ d1oaha\_ d1sp3a\_  
d1g66a\_ d5ajha1 d3h33a\_ d1rwja\_ d19hca\_ d1os6a\_ d3bxua\_ d3h4na\_  
d1i77a\_ d3caoa\_ d2ctha\_ d1duwa\_ d1ofwa\_ d2e84a\_ d1hh5a\_ d1gyoa\_  
d3h34a\_ d1um8a\_ d1ixza\_ d1qvra2 d1qvra3 d1qzma\_ d1sxjc2 d1jr3d2  
d2p65a\_ d118qa2 d3hu3a3 d1sxjd2 d1njfa\_ d1in4a2 d1sxja2 d1tuea1  
d2ce7a2 d1w5sa2 d1sxjb2 d1d2na\_ d1ny5a2 d1ofha\_ d2gnoa2 d2a5yb3  
d1fnna2 d1u0ja1 d11v7a\_ d1iqpa2 d2fnaa2 d1ixsb2 d4gita\_ d1sxje2  
d1g41a\_ d2e3fa\_ d2e3ea\_ d21lda\_ d2ny8x\_ d2e3ga\_ d2ny9x\_ d2nz3a\_  
d21j7a\_ d1n4na\_ d2m8bb1 d2kyqa\_ d3psma\_ d1jkza\_ d1jxca\_ d2g11a\_  
d1ugla\_ d4uj0a\_ d2k4ua\_ d1hp2a\_ d2lu9a\_ d1baha\_ d2meoa1 d1wm7a\_  
d1hlya\_ d1n8ma\_ d1jlza\_ d1wpda\_ d1c55a\_ d1pvza\_ d1wt7a\_ d1rjia\_  
d1wz5a\_ d1m2sa\_ d1pjva\_ d1c49a\_ d1qkya\_ d2ktca1 d1wmta\_ d1du9a\_  
d1j5ja\_ d1r1ga\_ d1t0za\_ d2i61a\_ d1t1ta\_ d1sn4a\_ d1kv0a\_ d21kba\_  
d1npia\_ d1wwna\_ d1pe4a\_ d2kbka\_ d21i7a\_ d1djta\_ d2kbha\_ d1dq7a\_  
d1sega\_ d1omya\_ d1zywa1 d1jzaa\_ d1n9wa1 d1bbua1 d1e1oa1 d1c0aa1  
d1b8aa1 d110wa1 d3a74a1 d1eova1 d1iyjb4 d1iyjb5 d1iyjb3 d1o7ia\_  
d4ipca1 d1x3ea\_ d4apva\_ d1jb7a1 d1jb7a2 d1jb7a3 d3kdfa\_ d1ue1b\_  
d1wjja1 d3eiva\_ d1xjva2 d1xjva1 d2ccza2 d1se8a\_ d11loc\_ d1jb7b\_  
d1qvca\_ d1qzga\_ d1miua4 d1miua5 d1miua3 d3g48a1 d1gd7a\_ d1mkha\_

d1jjcb3 d1pyba\_ d1y14b1 d2nn6i1 d1i94l\_ d2zjra2 d1smxa\_ d2qamc2  
d1hh2p1 d2r7da1 d1rl2a2 d1wfga1 d3bzka4 d1x6oa2 d3a0ja\_ d2j01d2  
d2ja9a1 d4q15a\_ d1hr0w\_ d1luza\_ d2n3sa\_ d2vnud1 d1h95a\_ d1go3e1  
d2nn6h1 d1ne3a\_ d2mola\_ d1liz6a2 d1jjga\_ d1e3pa2 d2ix0a3 d2ix0a2  
d2lxja\_ d1ueba3 d1ueba2 d2z0sa1 d1u0la1 d2ix0a1 d2eifa2 d2je6i1  
d3i2za1 d2c35b1 d2ahob2 d1t9ha1 d3i4oa\_ d2qall1 d1jt8a\_ d2nn6g1  
d1g6pa\_ d3cama\_ d1i94q\_ d1c9oa\_ d1d7qa\_ d2ba0a1 d2vnud2 d2vnud3  
d1khia2 d2qalq1 d1wi5a1 d1xtda2 d1ny4a\_ d1dzka\_ d4tlja\_ d2a2ua\_  
d4wfva\_ d3t1da\_ d4iaxa\_ d3zq3a\_ d2nnda\_ d1i4ua\_ d1kxoa\_ d1bbpa\_  
d1kt7a\_ d1exsa\_ d3s26a1 d1lf7a\_ d1qfta\_ d4gh7a\_ d1z24a1 d1qabe\_  
d1xkia\_ d3bx7a\_ d4iawa1 d1n0sa\_ d1gkab\_ d3kzaa\_ d2k23a\_ d2l9ca1  
d2joza1 d1gm6a\_ d3kffa\_ d3saoa1 d1e5pa\_ d1yupa1 d1iua\_ d2shpa1  
d1yfoa\_ d1l8ka\_ d2ooqa1 d1g4us2 d1p15a\_ d1lara2 d1lara1 d1wcha\_  
d2fh7a2 d2fh7a1 d1ohea1 d1ohea2 d2f4da\_ d1rxda\_ d2hxpa\_ d1xria\_  
d1d5ra2 d1fpza\_ d3ezza\_ d4y2ea\_ d1i9sa\_ d3azya\_ d3wvja\_ d1upsa1  
d1ajoa\_ d2hyka\_ d1ajka\_ d2vy0a\_ d1o4ya\_ d3o5sa\_ d3d6ea\_ d3atga\_  
d1dypa\_ d1umza\_ d3i4ia\_ d1c1la\_ d4lbqa\_ d1a78a\_ d1slta\_ d4no4a\_  
d3zsja\_ d3duia\_ d1g86a\_ d1is3a\_ d1qmja\_ d1hlca\_ d1tdha3 d1q3ba3  
d1ee8a3 d1k82a3 g1qmo.1 g1len.1 d3zyra\_ d1fnya\_ d1n47a\_ g2ltn.1  
d1avba\_ d3usua\_ d1dhkb\_ d1f9ka\_ d1ukga\_ d1g8wa\_ d1g9fa\_ d1wbfa\_  
d3wcsa\_ g1loe.1 d1mvqa\_ d1hq1a\_ d1v6ia\_ d1dbna\_ d1qnwa\_ d1fx5a\_  
d4l8qa\_ d1ioaa\_ d3n35a\_ d1epwa1 d1eysc\_ d2h0ba\_ d2erfa\_ d1h30a1  
d3mw4a1 d1pz7a\_ d2r1ba\_ d3v64a1 d1d2sa\_ d3bopa1 d3mw3a1 d1okqa1  
d1okqa2 d1wioa4 d1ccza2 d1vcaa1 d1dr9a2 d2d9qb1 d2nxyb2 d1adqa1  
d1fnga1 d1uvqb1 d1zs8a1 d2vola1 d2vola2 d1mfb12 d2jelh2 d1uwel2  
d3qq4b1 d1kjbv\_ d1k5na1 d1osph2 d4odh12 d1ow0a1 d1ow0a2 d1bfob2  
d3l9ra2 d3jtth1 d2fath2 d4elkb2 d1fn4b2 d2xfxb\_ d1pg7x2 d1cqka\_  
d4k71b2 d1lk2a1 d1eapb2 d4lfhg2 d1i4fa1 d2nw2a2 d1kfah2 d1mhca1  
d1h3ua1 d1wejh2 d1h0db2 d1a5fh2 d1kcvh2 d1mjuh2 d1qqda1 d1kcrh2  
d1k8ia1 d3huja2 d2nnab1 d1nfd2 d3mffb2 d1s9va1 d1lk3h2 d1q0xl2  
d1fv1b1 d1neza1 d4rfeb2 d1r3ha1 d1a6tb2 d1kjva1 d1pz5b2 d1onqa1  
d2bc4a2 d1de4a1 d1k8da1 d1tcra2 d1dn0b2 d1nfde2 d2xwtb2 d1bfoa2  
d1mexh2 d1iakb1 d1ypzf2 d4f7ea2 d1q72l2 d2fbjh2 d1fe8h2 d1clzh2  
d1fngb1 d1uvqa1 d1vgka1 d1c16a1 d4j12a2 d4x99b2 d1igtb3 d1je6a1  
d1q72h2 d1nldh2 d1teth2 d2hmic2 d1i1ca2 d1i1ca1 d1k8ib1 d1q0yh2  
d1kfa12 d3frua1 d1pg7w2 d1u58a1 d1igyb4 d1igyb3 d1hyrc1 d1klub1  
d1deeb2 d1c12b2 d2bc4b2 d2ig2h2 d1kcv12 d3wn5b1 d1lk2b\_ d1lk3l2  
d1mjul2 d1sm3h2 d1q0xh2 d1zvsa1 d1ydpal d1u8ib2 d1ypze2 d1kcuh2  
d1op9a\_ d1y0la1 d1letzb1 d1egj11 d2gsib1 d1nj9a1 d4jfhd1 d1aqk11  
d1t2ja\_ d1lo4h1 d1zvya1 d3v4v11 d4enec1 d1kxtb\_ d5e8ea1 d2pxya\_  
d4weud\_ d1xiwc\_ d2esvd1 d1qnzh\_ d1logae1 d1f4xh1 d4n1hb\_ d3ezjb1  
d3mlw11 d1kfah1 d1etza1 d1b4jh1 d3cfic\_ d4w68a\_ d2arja1 d1ek3a\_  
d2ok0l1 d1vera\_ d1uwgh1 d1blnb1 d1fpth1 d1rzga1 d2giya1 d4m3kb1  
d1nc2a1 d2nyyd1 d1ncna\_ d1fbih1 d5dxwa\_ d4fqqa1 d1dqdh1 d1jfq11



d1kelh1 d1faih1 d1frgl1 d1figl1 d4m6n11 d1fo0a\_ d4hxb11 d3b5ga\_  
d3quyd1 d2h9gb1 d1i8kb\_ d2dd8h1 d2ck0h1 d1eaja\_ d4w6wb1 d2a6ib3  
d1t66d1 d2e27h\_ d1ob1b1 d1f11b1 d2v7na1 d1ad0a1 d2xt1b1 d1pskh1  
d4i13b1 d2op4l1 d1a0ql1 d1uwel1 d1za3a1 d1ncb11 d4uu9a\_ d1bm3h1  
d1cloh1 d1nqba2 d1cf8h1 d4y5va\_ d1mhph1 d5anma1 d4cdgc1 d4ldeb\_  
d1y0lb1 d2pcpb1 d1z3gl1 d1dfb11 d1fh5h1 d3g5xa1 d1tzib1 d4dn3l1  
d3zhka1 d2b1hh1 d2uyla1 d1f3dh1 d1nj9b1 d2agjh1 d2h1pl1 d1q72h1  
d8fabbb1 d1ndmb1 d1rjca1 d4u6hb1 d3upca\_ d2fbj11 d1osph1 d1tvda\_  
d2cjh\_ d4fhbd1 d1bd2d1 d1rz7h1 d3nn8a\_ d1blna1 d1knoa1 d1nfda1  
d2bmkb1 d1dq11\_ d1igyb1 d1igf11 d12e8h1 d3utza1 d1nc2b1 d1rihh1  
d4mwfb1 d4jvpa1 d1mieh1 d1rhfa1 d1fgn11 d1sbsh1 d1lp9e1 d1dn0a1  
d4lqf11 d1iaih1 d1kgcd1 d1mh5b1 d1gpol1 d2g60h3 d1f8t11 d2jixd1  
d4grwh\_ d1fo0b\_ d1bfob1 d1axsa1 d1u9ka\_ d1nmbh\_ d1h8na1 d1h8na2  
d1jguh1 d4eura1 d3sdy11 d35c8h1 d1w7211 d1mvub\_ d1i9rh1 d1ob1a1  
d4wenb\_ d1yeeh1 d3ietc1 d1f58h1 d1ad0b1 d1mqk1\_ d1nbvh1 d4b50a\_  
d3r8bb\_ d1baf11 d1mamh1 d4rgne1 d2gsgb\_ d35c8l1 d1bafh1 d1ai1h1  
d2pcpa1 d2fath1 d2x1pa\_ d1orsb1 d1ibgl1 d1shma\_ d1a2yb\_ d1u0qa\_  
d2coqa\_ d1hilb1 d1qfwi\_ d1jv5b\_ d1fn4b1 d5e0qa\_ d1nsnh1 d1plgl1  
d4ocx11 d1kb5h1 d1rzfh1 d1pg7x1 d2fx7h1 d2oi9c\_ d1l7i11 d3eyva1  
d1d5i11 d4ffyl\_ d1tet11 d1a6wh\_ d1ac6a\_ d3dvfa\_ d1nfdel d1mimh1  
d1ri8a1 d1jhlh\_ d3dura\_ d1fskb1 d1f97a1 d3so3b1 d2ak4d1 d1lp9f1  
d4z7wf1 d1l7th1 d4y5ya\_ d4x7ec1 d1emth1 d1ikf11 d1nlbh1 d4utal1  
d1bjma1 d1eapb1 d1u6ah1 d2dtgd1 d1kj2b\_ d1xeda1 d1cleh1 d1fgvh\_  
d2bnub1 d2fb4h1 d2dtgb1 d1ktrh\_ d1jpth1 d1qkz11 d4hepg\_ d2atpb1  
d1flrh1 d2hrp11 d1mvfa\_ d1iaim1 d3k80a1 d2jb5h1 d3zkxc\_ d4grwe\_  
d1it9h1 d1rhhb1 d3w9ec\_ d1e4wh1 d1sy6h1 d2j6eh1 d3qxta\_ d1jglh1  
d1p7ka1 d1tzhb1 d4n8pa1 d1gaf11 d2jelh1 d1wioa2 d4i0cc1 d1cicb1  
d1lmka2 d1lmka1 d1iqwh1 d1orqb1 d1ejoh1 d1jnlh1 d4zgl1a\_ d43c9b\_  
d1ggb11 d1wejh1 d3q6fa1 d1f3dj1 d3c6la1 d1bqlh1 d3p9wb\_ d1a3r11  
d1h0db1 d2uzil\_ d1eo8l1 d1qfwl\_ d1n7ml1 d1igja1 d1c5ch1 d2a9mh\_  
d1rmfh1 d1fj1b1 d4heme\_ d1ccza1 d1a5fh1 d1logad1 d1dlfh\_ d1qa9b\_  
d1vge11 d3qskb\_ d1sjxa\_ d4ozfg1 d1sq2n\_ d1qd0a\_ d1kcvh1 d1c5db1  
d3qcull d8faba1 d3bn9d1 d1mjuh1 d4y8dc\_ d7fabh1 d3dvgb1 d1lo0l1  
d1a6tb1 d1gigh1 d1kcrh1 d2hwz11 d1yjdc1 d3clfl1 d4krna\_ d1dl7l\_  
d1e6o11 d1mexh1 d3r0ma\_ d4kkna\_ d1fns11 d1loaqh\_ d1rzia1 d1ucbh1  
d1ncw11 d4b41a\_ d1nfdfl d2mpah1 d2d7t11 d4grwf\_ d4b5ea\_ d1lk3h1  
d3u79a\_ d4u3xa\_ d1ghfl1 d1bvkb\_ d1mcww1 d1b88a\_ d1jrhh1 d32c2b1  
d4wemb\_ d1dsfh\_ d1op3h1 d1ce111 d1iqda1 d1qoka1 d1qoka2 d1qfuh1  
d2crya1 d1ay1h1 d1loaql\_ d3ab0b\_ d1rur11 d1t4kb1 d1bz7b1 d1n0xh1  
d1for11 d1ucb11 d4w6yb\_ d43c9a\_ d2aab11 d1tzia1 d4n1ca\_ d1k6qh1  
d3g9ab\_ d4tvsa1 d1igmh\_ d1pz5b1 d3dx9a1 d3wxwh\_ d1nakh1 d1kcull1  
d3eaka\_ d4qlra1 d1cr9l1 d1d9ka\_ d1f4x11 d1deea1 d2i27n2 d1c12a1  
d2orb11 d1j8hd1 d1mcp11 d1c5da1 d1kenh1 d1bd2e1 d1h5ba\_ d4x7fc1  
d3upaa\_ d1t3fa1 d1indh1 d2dtgc1 d4hc111 d1zv5a1 d4wgvb\_ d1uwgl1

d4f37k1 d1laqkh1 d1vesa\_ d3zkqd\_ d1fptl1 d1lo4l1 d1knob1 d3rrqa\_  
d1ct8b1 d4orzc\_ d1mlbb1 d4hgkc1 d1dqdl1 d1bogb1 d4ozhe1 d1dr9a1  
d1i7za1 d1dn0b1 d1kell1 d1rzib1 d1ypzf1 d1wtla\_ d1hkfa\_ d1fail1  
d1figh1 d2vyre\_ d1sjva\_ d1ohqa\_ d1bfoa1 d1pkqb1 d1mjul1 d1b4j11  
d1nsn11 d2arjb1 d1p4bh\_ d4aj0a\_ d3nn8b\_ d2rcja1 d1f2xk\_ d4v1dd\_  
d1adqh1 d2eksa\_ d4k3ga\_ d1jfqh1 d1luweh1 d1frgh1 d4gftb\_ d1uz8b1  
d4n1ea\_ d1bm3l1 d1clol1 d3mcka1 d2vq1a1 d1ae6h1 d4aq1b1 d1uj3b1  
d1nbqa1 d1fh5l1 d2ck0l1 d2ywza\_ d1q72l1 d4nxbx\_ d1hila1 d4hz1b1  
d2j88l1 d1zmya1 d1cd0a\_ d1a4ka1 d1pskl1 d1a0qh1 d4krmb\_ d1ncbh1  
d2fbjh1 d1j8he1 d1i3ua\_ d1cf8l1 d1fe8h1 d2p1ya1 d1eeqa\_ d2x89a\_  
d1ol0a\_ d2r0lh1 d1ub5a1 d1dfbh1 d3eyvb1 d4jdvb1 d4p2cg\_ d2gsia1  
d2agj11 d1u3ha1 d2h1ph1 d1rih11 d1fskc1 d1boga1 d2a77l1 d1osp11  
d1qfoa\_ d3dwta\_ d2fx7l1 d1rz7l1 d3stba1 d1pkqa1 d1b6da1 d1dzba2  
d1dzba1 d1kj2a\_ d4l1ha\_ d1rzgb1 d1dq1h\_ d12e8l1 d1miel1 d1jmaa\_  
d1sbs11 d1fgnh1 d1f58l1 d1mqkh\_ d1ndgb1 d3qeg11 d1iail1 d2aw2a1  
d1tqbc1 d3fo2a1 d4dkaa\_ d1f8th1 d2g60l1 d2ywya\_ d1uj3a1 d1yc7a\_  
d3bd3a\_ d4w6xb1 d1nmb1\_ d1i8ka\_ d1rj1b1 d1ypze1 d1p7kb1 d1kxqe\_  
d1gpoh1 d2z4qa1 d1w72h1 d1i9rl1 d4qgya1 d4xt1c\_ d2qqnh1 d1cical  
d3c08h1 d2cd0a\_ d2bdnh1 d1hnga1 d1mam11 d1nldh1 d1cr9h1 d4lcih1  
d3bkyh1 d3qg7l1 d1ai1l1 d1kxvc\_ d4iosd\_ d117ih1 d2x1qa\_ d1ub6b1  
d3k74b\_ d1libgh1 d1teth1 d1igya1 d1hxma1 d2x6ma\_ d2e71a\_ d5e03a\_  
d1qfwm\_ d2r0kh1 d1igjb1 d1rurh1 d1plgh1 d1mj8h1 d1yuhb1 d3fmg11  
d1rzzf11 d1emtl1 d1ad9b1 d1igtb1 d1nlb11 d1d5ih1 d3k7ua\_ d4ffyh\_  
d1bwwa\_ d3dvga1 d1a6ta1 d1fgvl\_ d4qxgl1 d1mim11 d1jh11\_ d2hffb1  
d2hh0l1 d1qkzh1 d1l7tl1 d1afvh1 d1iaii1 d2cjuh\_ d1um5h1 d2ghwb2  
d2ghwb1 d1kgce1 d2fgwh1 d1likfh1 d1dvfd\_ d2i24n1 d2xtjb\_ d1za3b1  
d2ycla\_ d2hh0h1 d2x1oa\_ d1bvka\_ d1rj1a1 d5e7ba1 d1igta1 d1l11b1  
d2fb4l1 d1mvua\_ d1jpt11 d32c2a1 d1fvca\_ d1iqdb1 d2hrph1 d2p4ab\_  
d4qola\_ d1p2cb1 d1wt5c\_ d1t4ka1 d5c1mb\_ d1it9l1 d1bz7a1 d1b2wh1  
d1e4w11 d1jnl11 d1yedb1 d1za6b1 d3u7aa\_ d1igfh1 d3gnml1 d1orsa1  
d1wejl1 d1a2ya\_ d1hxmb1 d1gafh1 d2j4wh1 d1pz5a1 d1j05a\_ d1a3rh1  
d4fq1l1 d1qfwh\_ d1eo8h1 d1n7mh1 d4s11a\_ d1kegh1 d5da4a\_ d1iqw11  
d3whxb1 d1vgeh1 d1deeb1 d1c12b1 d1t2ql1 d1ad9a1 d3gsnb1 d3b2uc1  
d1ggbh1 d1t3fb1 d1nak11 d4ocmc\_ d1lila1 d2v7hb3 d2esve1 d1mcoh1  
d2qr0b1 d2q3aa\_ d1ct8a1 d1kcrl1 d2pxyb\_ d2uzih\_ d5c3ld\_ d3durb\_  
d1c5c11 d2ak4e1 d1d17h\_ d1xiwd\_ d1mlba1 d1rmfl1 d1i7zb1 d1d1fl\_  
d2xa3a\_ d5bq7b1 d1dqqb1 d3h42l1 d1legjh1 d1kcv11 d1fe8l1 d2j6e11  
d1f3rb2 d1l1k3l1 d1sm3h1 d1q0xh1 d1ghfh1 d7fab11 d1igch1 d1lo0h1  
d4idla\_ d5c2b1\_ d1jrhl1 d3zhda1 d4kfzc\_ d1b0wa\_ d1e6oh1 d1mex11  
d4krpb\_ d1fnsh1 d1ncwh1 d4hgma\_ d4eigb1 d4rzca\_ d2mpal1 d4y5xa\_  
d5en2b1 d3lrga1 d4ej1c1 d1rhha1 d1j05b\_ d1forh1 d1q9wb1 d2wzpd\_  
d2aq2a1 d1h0da1 d3revb1 d2ij0c1 d1tzha1 d4m7j11 d1k6ql1 d3b9kc1  
d1igml\_ d3qeua1 d1dsfl\_ d1celh1 d1kcu11 d1zvha1 d1zvoa1 d1tqbb1  
d1ay1l1 d2qsc11 d2cgrh1 d1nl0h1 d1ken11 d3eo0a1 d4n9ob1 d1n0x11

d3k1kc\_ d1c4qa\_ d1prtc1 d2wv6d\_ d1prtf\_ d1ltrd\_ d4l63b1 d1r4pb\_  
d1prtd\_ d1tl0f\_ d2bosa\_ d1prtb1 d2aq2b1 d1ck1a1 d1lenfa1 d1i4pa1  
d1v1oa1 d1et9a1 d1esfa1 d2g9hd1 d4ohja1 d1klud1 d1bxta1 d1eu3a1  
d1ty0a1 d1fnua1 d2cqva1 d1fhga\_ d2k1ma\_ d2d12a1 d1biha3 d1biha1  
d1biha4 d3qp3a1 d1g1ca\_ d1gxea\_ d1cvsc2 d1cvsc1 d1xmwa2 d1m4ka2  
d2otpa2 d1biha2 d1rhfa2 d2fcba2 d2fcba1 d1wwbx\_ d1gsma2 d1lepfa1  
d1lepfa2 d2dava1 d1waaa\_ d1f97a2 d1x44a1 d1vcaa2 d1fnla2 d1fnla1  
d3b5ha2 d3h8na2 d3h8na1 d1jbja1 d1jbja2 d1pd6a\_ d1f2qa2 d1f2qa1  
d3cx2a\_ d1nbqa2 d3b5ha1 d1n26a1 d1xiwb\_ d1xaua\_ d1fltx\_ d2ifga1  
d1olla1 d1olla2 d1cs6a4 d1cs6a3 d1cs6a2 d1cs6a1 d2gw5a2 d1sy6a1  
d1xiwa\_ d1lucta2 d1lucta1 d1ry7b2 d1gl4b\_ d1qz1a3 d1olza1 d2c9aa1  
d1wwca\_

**Family-43 (c.1.10.1)**

**Positive dataset contains 21 protein sequences.**

d3l21a\_ d2e1da\_ d1to3a1 d1w3ia\_ d1sfla\_ d1vcva1 d4imeaa\_ d1wa3a\_  
d2ocza1 d3m16a\_ d2yxga\_ d3a5fa\_ d1xfba1 d1wx0a1 d1vpxa1 d2a4aa1  
d1xkya1 d3cq0a1 d3s1xa\_ d3cpra1 d4d2ja\_

**Negative dataset contains 3954 protein sequences.**

d1m32a\_ d1libja\_ d1c7na\_ d1iuga\_ d4q75a\_ d2bkwa1 d1t3ia\_ d1n8pa\_  
d1qz9a\_ d1jff9a\_ d1p3wa\_ d3kgwa\_ d1cl1a\_ d2ctza1 d1vjoa\_ d2rfva\_  
d1gc0a\_ d1cs1a\_ d1d2fa\_ d2ch1a1 d1qgna\_ d1pffa\_ d1elua\_ d1xfda2  
d1u08a\_ d1lc5a\_ d1b5pa\_ d1bw0a\_ d3pd6a\_ d7aata\_ d2csta\_ d1j32a\_  
d1fg7a\_ d4wlha\_ d1o4sa\_ d1v2da\_ d1gdea\_ d1m6sa\_ d1v72a1 d1svva\_  
d1ajsa\_ d1wsta1 d2f8ja2 d1lk9a\_ d1vp4a1 d1xi9a1 d2gb3a1 d1yaaa\_  
d3i2ka1 d1lnsa3 d1mpxa2 d1xkta1 d2hfka\_ d1jmkc\_ d5d3ka\_ d1c7ga\_  
d2v1pa1 d2ez1a\_ d2bnma2 d1qnia1 d1libya\_ d2wo3b\_ d1shxa\_ d1js9c\_  
d1f15b\_ d1za7a\_ d1laja\_ d1gyca3 d1hfua2 d1kbva1 d1kbva2 d1sdda1  
d1sdda2 d1gyca1 d1gyca2 d1mzya1 d2bw4a1 d1aoza1 d1aoza3 d1aoza2  
d1kyaa2 d1kyaa3 d1kyaa1 d1mzya2 d4e9sa1 d1sddb1 d1sddb2 d1hfua1  
d1hfua3 d1oe1a2 d1oe1a1 d1v10a2 d1v10a3 d1v10a1 g1f8v.1 d1novc\_  
d2bbvc\_ d1a3qa1 d1iknc\_ d3brda1 d1p7h11 d1oy3c\_ d1gjia1 d1zk9a1  
d2cxka1 d2h0va\_ d1adqa1 d1fnga1 d1uvqb1 d1zs8a1 d2vola1 d2vola2  
d1mfb12 d2jelh2 d1luwel2 d3qq4b1 d1kjob\_ d1k5na1 d1osph2 d4odh12  
d1ow0a1 d1ow0a2 d1bfob2 d3l9ra2 d3jtth1 d2fath2 d4elkb2 d1fn4b2  
d2xfxb\_ d1pg7x2 d1cqka\_ d4k71b2 d1lk2a1 d1eapb2 d4lfhg2 d1i4fa1  
d2nw2a2 d1kfah2 d1mhca1 d1h3ua1 d1wejh2 d1h0db2 d1a5fh2 d1kcvh2  
d1mjuh2 d1qqda1 d1kcrh2 d1k8ia1 d3huja2 d2nnab1 d1nfd2 d3mffb2  
d1s9va1 d1lk3h2 d1q0x12 d1fv1b1 d1neza1 d4rfeb2 d1r3ha1 d1a6tb2  
d1kjva1 d1pz5b2 d1onqa1 d2bc4a2 d1de4a1 d1k8da1 d1tcra2 d1dn0b2  
d1nfd2 d2xwtb2 d1bfoa2 d1mexh2 d1iakb1 d1ypzf2 d4f7ea2 d1q7212  
d2fbjh2 d1fe8h2 d1clzh2 d1fngb1 d1uvqa1 d1vgka1 d1c16a1 d4j12a2  
d4x99b2 d1igtb3 d1je6a1 d1q72h2 d1nldh2 d1teth2 d2hmic2 d1ilca2  
d1ilca1 d1k8ib1 d1q0yh2 d1kfa12 d3frua1 d1pg7w2 d1u58a1 d1igyb4  
d1igyb3 d1hyrc1 d1klub1 d1deeb2 d1c12b2 d2bc4b2 d2ig2h2 d1kcv12

d3wn5b1 d11k2b\_ d11k312 d1mjul2 d1sm3h2 d1q0xh2 d1zvsa1 d1ydpal  
d1u8ib2 d1ypze2 d1kcuh2 d1zx5a1 d1qwra\_ d2phla2 d2phla1 d1fxza2  
d1fxza1 d1lrha\_ d1uija1 g1dgw.1 d2v09a\_ d1uika2 d1uika1 d1dgwa\_  
d1nepa\_ d1ds6b\_ d1fstb\_ d1ex0a1 d1g0da1 d3us3a3 d3us3a1 d1v70a\_  
d2f4pa1 d1yhfa1 d4mh8a\_ d4i7ga1 d1au7a2 d1ic8a2 d2ovga\_ d1sq8a\_  
d1rzsa\_ d3kz3a\_ d3orca\_ d3gpdg2 d2q49a2 d1hdgo2 d2g17a2 d2cvoa2  
d2czca1 d3pwka2 d1obfo2 d1i32a2 d1zyao2 d2pkqo2 d1b7go2 d2hjsa2  
d1cf2o2 d1vkna2 d1nvmb2 d2msya\_ d2djoa1 d2r5za\_ d1au7a1 d1f43a\_  
d21mda1 d1akhb\_ d1s7ea1 d3nara\_ d1zq3p1 d2craa1 d1mija\_ d4uuta\_  
d3a01a\_ d1x58a1 d3rkqa1 d3cmya1 d2cqxa1 d2da6a1 d1e3oc1 d1fjla\_  
d1mh3a1 d1ig7a\_ d1x41a1 d1wh7a1 d1gt0c1 d2mw8a\_ d1lfup\_ d1x2ma1  
d1b72a\_ d1wi3a1 d1wjha1 d1x2na1 d1mnm\_ d2cuea1 d3k2aa\_ d2hosa\_  
d2jwta2 d1pufa\_ d1octc1 d2hi3a\_ d1b8ia\_ d4j19a\_ d3lnqa\_ d1wh5a1  
d1b8ib\_ d1fexa\_ d2cqra1 d1guua\_ d1ug2a1 d2cqqa1 d2ajea1 d4a69c\_  
d2crga1 d2iw5b1 d1xc5a1 d1ofcx1 d2cu7a1 d1wgxa1 d2cjja1 d2ckxa1  
d1gvda\_ d1igna2 d2iu5a1 d1zk8a1 d2g7sa1 d2fd5a1 d2np5a1 d1z0xa1  
d2id6a1 d2d6ya1 d2i10a1 d1vi0a1 d2oi8a1 d3c07a1 d2ns7a1 d2fq4a1  
d2yvea1 d1t33a1 d2o7ta1 d1rktal d2np3b1 d2g7ga1 d2gena1 d2fbqa1  
d2g7la1 d2gfna1 d2g3ba1 d2jj7a1 d2hyja1 d1sgma1 d1ui5a1 d2hkua1  
d2id3a1 d4jyka1 d3lv8a\_ d1s3ga1 d1zaka1 d1s4qa\_ d3tvta2 d1uf9a\_  
d1khta\_ d1ckea\_ d1osna\_ d1p5zb\_ d4tmka\_ d3cm0a\_ d1tmka\_ d1jaga\_  
d3h86a\_ d1t0hb\_ d1nn5a\_ d2h92a\_ d3kb2a1 d2c95a1 d1yj5a2 d1kgda\_  
d1ly1a\_ d2ak3a1 d1vyva2 d1deka\_ d2grja1 d1p3ja1 d1y63a\_ d1e4ya1  
d1s96a\_ d3iija1 d1lvga\_ d1nksa\_ d1vyua2 d4e22a\_ d1qf9a\_ d1jjva\_  
d1q3ta\_ d1ki9a\_ d1lw7a2 d1teva\_ d1kywa2 d2iyva2 d1kaga\_ d1e6ca\_  
d1g3ma\_ d1j99a\_ d1t8ta1 d1nsta\_ d1fmja\_ d1zrha\_ d1ls6a\_ d2a3ra\_  
d1aqua\_ d2zptx\_ d3ckla\_ d1texa\_ d1q44a\_ d2gwaha\_ d1z0ja1 d3umra2  
d3gj0a1 d2gaoa1 d1yzga1 d1x3sa1 d1g7sa4 d1puja\_ d1udxa2 d1kk1a3  
d2o52a\_ d1jwyb\_ d1zcaa2 d1zcba2 d2fv8a1 d2cjwa\_ d3dz8a1 d1xzpa2  
d1vg8a\_ d4qxaa\_ d2ew1a1 d1x1ra1 d2bcgy\_ d3doea1 d3cona\_ d3rega\_  
d3wyga\_ d1upta\_ d2b6ha1 d1zd9a1 d1lnza2 d1r5ba3 d1n0ua2 d1r2qa\_  
d2f91a1 d2rhda\_ d3q3jb\_ d3q85a\_ d1efma1 d1r8qa\_ d2gf9a1 d2akab1  
d1ek0a\_ d1z08a1 d2gcoa1 d2dy1a2 d4g01b\_ d2cxa1 d1svia\_ d3q72a\_  
d1ni3a1 d4ac9a4 d2erxa1 d2bmea\_ d1wxqa1 d2gf0a1 d4ldja1 d1zunb3  
d1d5ca\_ d4lv5b\_ d1efca3 d1kmqa\_ d2g6ba1 d3lrpa\_ d1tada2 d2y8ea\_  
d4rd4a1 d1z06a1 d2heia\_ d3a58b\_ d1u01a2 d1d2ea3 d1zj6a1 d2ocba\_  
d3rwoa\_ d1mr3f\_ d2e9sa1 d4u5xa1 d2iwra\_ d2fn4a1 d3bwdd\_ d2nzja1  
d2atva1 d2ksqa\_ d3l43a\_ d1mkya2 d1mkya1 d1wmsa\_ d1jnya3 d2rmka\_  
d1f6ba\_ d1f60a3 d1gota2 d1jala1 d2fh5b1 d1g16a\_ d2wblc\_ d1m7ba\_  
d1wf3a1 d1f5na2 d1t9ha2 d1z6xa1 d1z0aa1 d2fg5a1 d2a5ja1 d2bcjq2  
d1s0ua3 d1ky3a\_ d4y0va\_ d4lhwa\_ d2qmea1 d2atxa1 d1legaa1 d1ryha\_  
d1moza\_ d1nrjb\_ d2erya1 d3bfka\_ d1puia\_ d3j3az1 d3t5ga\_ d1shza2  
d3defa\_ d2f7sa1 d3raba\_ d3tsoa\_ d3aq4a\_ d2a17a1 d3sfva1 d3bc1a\_  
d2ncda\_ d1sdma\_ d3h4sa1 d2heha\_ d2grya\_ g3kin.1 d1kk8a2 d1br2a2

d1goja\_ d1f9va\_ d2mysa2 d1lkxa\_ d3t0qa\_ d4db1a1 d3gbja\_ d1ry6a\_  
d1v8ka\_ d1k8ka2 d1k8ka1 d3uleb1 d3i33a2 d3i33a1 d1dkgd2 d1dkgd1  
d4ci6a2 d1jcfa1 d4a2ba2 d2fxua1 d1yaga2 d1yaga1 d4cbua2 d1bupa2  
d1ig8a1 d1czan2 d1czan3 d1czan1 d1ig8a2 d1czan4 d1bg3a4 d1bg3a3  
d1bg3a2 d1nira1 d1qksa1 d2d0oa3 d2d0oa2 d1nbwa3 d1hroa\_ d4gedb\_  
d3zooa\_ d1mz4a\_ d1gu2a\_ d1f1fa\_ d1dvva\_ d1c6ra\_ d1c75a\_ d1e29a\_  
d1gdva\_ d1cnoa\_ d1h32b\_ d1co6a\_ d2bh4x\_ d2aiua\_ d5cytr\_ d1jdl\_ a\_  
d1i8oa\_ d2zboa\_ d3dmia\_ d1ls9a\_ d1wvec\_ d2yk3a\_ d3ph2b\_ d1dw0a\_  
d5aura\_ d1ql3a\_ d1qn2a\_ d1f1ca\_ d2nqya\_ d1h4ga\_ d1hixa\_ d1oa2a\_  
d1olra\_ d3b7ma\_ d4h7ma1 d3wp3a\_ d2vgda\_ d1igoa\_ d3zsea\_ d2nlra\_  
d3wx5a\_ d1oa3a\_ d1pvxa\_ d1m4wa\_ d1f5ja\_ d1oa4a\_ d1ks5a\_ d4ixla1  
d1evsa\_ d1cnt1\_ d1pvhb\_ d1z7ca\_ d1huwa\_ d1bgea\_ d1rhga\_ d1f6fa\_  
d1f45b\_ d1ilrb\_ d1axia\_ d1etea\_ d3tgxb\_ d1scfa\_ d2z3qa1 d3qb1a\_  
d1hula\_ d1m48a\_ d4nkqb\_ d1eera\_ d1v7mv\_ d5e4ea\_ d2o27a\_ d3b5ka\_  
d2psma1 d4zf7a\_ d3uf5a\_ d4x51a\_ d1d9ca\_ d4ypgc1 d3oq3a\_ d1n1fa\_  
d1aula\_ d1wu3i\_ d3bes1\_ d3ux9a\_ d1v8fa\_ d2ejca\_ d3muea1 d1lihoa\_  
d3q12a1 d4dnxa2 d1v47a2 d1g8fa2 d1jhda2 d1x6va2 d3rbaa\_ d2qtra\_  
d1nupa\_ d3l92a\_ d1f9aa\_ d1qjca\_ d2h29a\_ d1vlha\_ d1lod6a\_ d1mrza2  
d4ruka\_ d2e17a\_ d1iq0a2 d1r6ta2 d1ivsa4 d2cyba\_ d1rqga2 d1j09a2  
d2yxna\_ d1f7ua2 d1h3fa1 d1ffya3 d2g36a1 d1nzja\_ d1jila\_ d1n3la\_  
d1i6la\_ d1pfva2 d1h3na3 d3n9ia\_ d3sz3a1 d3sw2a\_ d1moxc\_ d1dx5i3  
d1edmb\_ d1aut12 d1aut11 d1nqlb\_ d1dval1 d1szba2 d1kigl\_ d2y5fl\_  
d1ijqa2 d1gk5a\_ d1g1sa2 d1nt0a3 d1xdtr\_ d1lmja2 d1lmja1 d1nzia2  
d2wphe\_ d1klil\_ d1pfx12 d1pfx11 d1p9ja\_ d1f7ea\_ d4yzub\_ d2mgpa1  
d1b9wa1 d2mgpa2 d1ob1c1 d1ob1c2 d1n1ia2 d1n1ia1 d2npra2 d2npra1  
d1f56a\_ d1bypa\_ d1azca\_ d1ws8a\_ d3u25a\_ d1cuoa\_ d1lid2a\_ d1rkra\_  
d2iaac\_ d4dp1x\_ d1nwpa\_ d2gima\_ d2i7sa\_ d1qhqa\_ d2y5ia\_ d1qlsa\_  
d1psra\_ d3n22a\_ d2egda\_ d4ggfc\_ d2wcea\_ d2luca\_ d4aqia\_ d3nsia\_  
d2lp3a\_ d1j55a\_ d1a4pa\_ d1k8ua\_ d1nsha\_ d1pvaa\_ d3fs7a\_ d2pvba\_  
d1ttxa\_ d2kyfa\_ d1rk9a\_ d1a75a\_ d1exra\_ d1tiza1 d1nyaa\_ d1g8ia\_  
d1ggwa\_ d1wdcc\_ d3fwba\_ d1ggza\_ d2o5ga\_ d1ctaa\_ d1m45a\_ d3i5gc\_  
d1sl8a\_ d1fpwa\_ d2scpa\_ d2roaa\_ d4aqra\_ d3pn7b\_ d1br1b\_ d2mysb\_  
d1s6ca\_ d1bjfa\_ d2obha\_ d1jfka\_ d1jf0a\_ d1qv0a\_ d1lkja\_ d2mlfc\_  
d2m97a\_ d2d8na\_ d4by5a\_ d1jbaa\_ d4nqga\_ d1wdcb\_ d2mysc\_ d1j7qa\_  
d1s6ia\_ d1uhka2 d1r2ua\_ d1dtla\_ d3kf9a\_ d3pn7c\_ d1gjya\_ d1y1xa\_  
d1hqva\_ d1dvia\_ d1qxp2\_ d4usla\_ d1k94a\_ d1wkya2 d1uuqa\_ d3wh9a\_  
d4m1ra\_ d1xyza\_ d4xuya\_ d2je8a5 d4bf7a1 d3cuia\_ d1ur4a\_ d1qw9a2  
d1lodza\_ d2vzsa5 d1bqca\_ d2x2ya1 d1hjqa\_ d1qnra\_ d4y7ea1 d1vjza\_  
d4k68a\_ d2v3ga\_ d4hpga\_ d1nofa2 d1nq6a\_ d1h4pa\_ d1aq0a\_ d3ziza\_  
d4bs0a\_ d1ecea\_ d1h1na\_ d1ta3b\_ d1w91a2 d1ilwa\_ d1uhva2 d1us3a2  
d1legza\_ d7a3ha\_ d1tvna1 d3nyda1 d1ghsa\_ d2cyga1 d4xv0a\_ d2c8na2  
d1w32a\_ d3emca\_ d1v6ya1 d1foba\_ d2uwfa1 d2fgla\_ d3niya1 d2c0ha1  
d1rh9a1 d1yq2a5 d1szna2 d1fa2a\_ d1pama4 d5do8a1 d1ea9c3 d1hx0a2  
d2fhfa5 d1qhoa4 d1avaa2 d1m53a2 d4m8ua1 d2gjpa2 d1lwha2 d4howa1

d1ktba2 d1j0ha3 d3vm5a1 d2x1ia\_ d1wzaa2 d1uasa2 d2diea1 d1mxga2  
d1ht6a2 d1eswa\_ d1liv8a2 d5cpsa\_ d1ud2a2 d1zjaa1 d3gbea1 d1kwga2  
d1wdpa\_ d1gcy2 d1g5aa2 d1hvxa2 d3dhpa2 d2bhua3 d4do4a1 d3qgva1  
d1e43a2 d1g94a2 d2d3na2 d1gjwa2 d1gvia3 d1x1na1 d1r7aa2 d1tz7a1  
d2x42a1 d1tr9a1 d3abza1 d4toqa\_ d1wb0a1 d1w9pa1 d1eoka\_ d1itxa1  
d1kfwa1 d1goia2 d1ledqa2 d2gsja\_ d1hjxa1 d1jnda1 d1vf8a1 d1letob\_  
d1umqa\_ d2w0pa\_ d2diaa1 d2e9ia2 d2e9ja1 d2dj4a1 d2eeba1 d2diba1  
d2dmba1 d2dmca1 d2d7oa1 d2ee6a1 d2d7pa1 d2eeaa1 d2di8a1 d1wlha1  
d2d7na1 d2nqca\_ d2d7ma1 d2dica1 d3cnka\_ d2k3ta1 d2eeca1 d1qfha1  
d2bp3a1 d1v05a\_ d2ee9a1 d2eeda1 d2di9a1 d1g4ma1 d1g4ma2 d1lidl\_ a\_  
d2hmta\_ d1lssa\_ d1offa\_ d1frfa\_ d3wcqa\_ d1e9ma\_ d1l5pa\_ d1wria\_  
d1i7ha\_ d3av8a\_ d1czpa\_ d1rfka\_ d3p1ma1 d3b2ga\_ d2bt6a2 d1wgqa1  
d1v89a1 d2coda1 d1zc3b\_ d1wg7a1 d1u5ea1 d1v61a1 d2coca1 d2ys1a1  
d1v5pa1 d1ntya2 d1wjma1 d1wil1a1 d1u29a\_ d1xx0a1 d1unqa\_ d2zkmx3  
d1fhoa\_ d1v88a1 d2adza1 d1x1fa1 d1p6sa\_ d2coaa1 d1btka\_ d1v5ma1  
d1faoa\_ d2x18a\_ d1dyna\_ d1x1ga1 d4kaxb\_ d2j59m1 d1xcga2 d1txda2  
d1u5da1 d1dbha2 d1w1ha\_ d1upqa\_ d1v5ua1 d1foea2 d2fjla1 d1leaza\_  
d2dfka2 d2cofa1 d1kz7a2 d9ldta1 d2ewda3 d1up7a1 d2dfda1 d1s6ya1  
d1vjta1 d7mdha1 d1hyea1 d1t2da1 d1ojsa3 d1ldna1 d1hyha1 d1civa1  
d2a92a1 d1ez4a1 d1i0za1 d1y6ja1 d1gv0a1 d1ur5a1 d1l1lda1 d1obba1  
d1v8ba1 d1gdha1 d2dlda1 d1mx3a1 d1ygya1 d1qp8a1 d1li4a1 d1j4aa1  
d2naca1 d1npya1 d3t4ea2 d1a4ia1 d1o0sa1 d2hk9a2 d2egga2 d1b26a1  
d1bvua1 d1gq2a1 d1c1da1 d1leha1 d1gtma1 d1euza1 d3dona2 d1ledza1  
d1gpja2 d1vi2a1 d1p77a1 d1nyta1 d1b0aa1 d1vl6a1 d1v91a1 d1txga2  
d3f47a1 d1mv8a2 d2pv7a2 d1xc2a3 d2ahra2 d4xiya1 d2f1ka2 d1pgja2  
d1i36a2 d1np3a2 d1lj8a4 d1teaa3 d1qmg2 d2i76a2 d2g5ca2 d1wdka3  
d1dlja2 d3cuma3 d1kola2 d1f8fa2 d1qora2 d1jqba2 d1vj0a2 d1cdoa2  
d1gu7a2 d1d1ta2 d1xa0a2 d2dm6a2 d1jvba2 d1rjwa2 d1llua2 d1h2ba2  
d1tt7a2 d1piwa2 d1o89a2 d1liz0a2 d1e3ja2 d1yb5a2 d1uufa2 d1vj1a2  
d3gpdg1 d1vc2a1 d2nvwa1 d1u8fo1 d1ydw1 d1hdgo1 d2g17a1 d1cf2o1  
d2czca2 d1r0ka2 d1obfo1 d2cvoa1 d1ebfa1 d1h6da1 d1i32a1 d1zh8a1  
d2q49a1 d1qkia1 d1j5pa4 d3pzra1 d1xeea1 d1vkoa1 d1vm6a3 d3qvs1a1  
d2pkqo1 d1b7go1 d1gr0a1 d1p1ja1 d1lc0a1 d1j0xo1 d3pwka1 d2hjsa1  
d1zyao1 d1vkna1 d1t1ta1 d1nvmb1 d3sjua\_ d3ojfa1 d1xu9a1 d2jjya1  
d1n7ha\_ d1ylpa1 d1h5qa\_ d1jtva\_ d4fs3a\_ d2bkaa1 d1gy8a\_ d2c5aa1  
d1ulsa\_ d1ooea\_ d2b69a1 d1y5ma1 d1spxa\_ d1aela\_ d1bxka\_ d1ydea1  
d1gega\_ d1hdoa\_ d1o5ia\_ d1e6ua\_ d1snya1 d2rhca\_ d3zv4a\_ d5ceja\_  
d2d1ya1 d1fjha\_ d3w8ea\_ d2fmua1 d1x1ta\_ d1rpna\_ d3ay7a1 d1k2wa\_  
d1eq2a\_ d2hrba1 d3ruaa\_ d2ew8a1 d4hwka\_ d1xgka\_ d2bd0a1 d1yo6a1  
d2a35a1 d2ntva\_ d1v18a\_ d1hdca\_ d4bkua\_ d2ag5a1 d2q45a\_ d1nffa\_  
d4iy1a\_ d1zbqa1 d1kewa\_ d1ek6a\_ d1ja9a\_ d2q46a2 d1iy8a\_ d1cyda\_  
d2ptga\_ d1hxha\_ d1uzma1 d3lyla\_ d4m89a\_ d3wyea\_ d2b1la1 d1w6ua\_  
d1sb8a\_ d2q2va\_ d4nr0a\_ d1e6wa\_ d2gasa\_ d3oiga1 d2bgka1 d1mxha\_  
d1vl0a1 d1rkxa\_ d1r6da\_ d1wmaa1 d1e7wa\_ d2c07a1 d1xkqa\_ d3tzha\_

d1g0oa\_ d3lz6a\_ d1qyca\_ d1ledoa\_ d1loc2a\_ d1t2aa\_ d1zema1 d2xoxa\_  
d1z45a2 d1geea\_ d1p33a\_ d3lt0a\_ d4e6pa\_ d2wyua\_ d1db3a\_ d4q9na\_  
d1xhla\_ d4o1ma\_ d1fmca\_ d2uvda\_ d2gdza1 d1uaya\_ d2z1ma\_ d2o23a2  
d2fr1a2 d2fr1a1 d1qsga\_ d1qyda\_ d4zjua\_ d2a4ka1 d1yb1a\_ d1wvga1  
d1yxma1 d3f4ba\_ d1mg5a\_ d1xg5a1 d1r55a1 d3gboa\_ d1atla\_ d1buda\_  
d4q1la\_ d1quaa\_ d1yp1a\_ d1wnia\_ d4ekfa\_ d2ckga\_ d1th0a\_ d2bkra\_  
d3ulra1 d1g9ka2 d1k7ia2 d1mixa2 d1e5wa2 d1isna2 d2al6b2 d3ioqa\_  
d1fh0a\_ d1o0ea\_ d1khqa\_ d1m6da\_ d2cb5a\_ g8pch.1 d1s4va\_ d2pnsa\_  
d1vsna1 d1mira\_ d1iwda\_ d2oula\_ d7pcka\_ d3bwka\_ d3bcna\_ d2p86a\_  
d1pvja\_ d1pcia\_ d1gece\_ d1deua\_ d4bs6a\_ d1xkga1 d1cqda\_ d1jqpa2  
d2c0ya\_ d2bdza\_ d3p5ua\_ d2o36a\_ d1k9xa\_ d1zoya1 d1qo8a2 d1d4ca2  
d1chua2 d1jnra2 d1kf6a2 d2jk6a2 d2jk6a1 d1feca1 d1feca2 d1lpfa1  
d1lpfa2 d1xhca1 d1xhca2 d1dx1a2 d1dx1a1 d1gera2 d1m6ia2 d1onfa1  
d1onfa2 d3lada2 d3lada1 d1w4xa1 d1w4xa2 d1gesa2 d1mo9a1 d1xdia1  
d1fl2a2 d1fl2a1 d1fcda1 d1fcda2 d1h6va2 d1h6va1 d1mo9a2 d1gv4a2  
d1gv4a1 d2gv8a2 d2gv8a1 d1aoga1 d1aoga2 d1hyua1 d1lebda1 d1lebda2  
d3dk9a1 d1q1ra1 d1gesa1 d3syxa1 d1mkea1 d2p8va\_ d1xoda1 d1i7aa\_  
d1evha\_ d1egxa\_ d1pn0a1 d1ju2a1 d2f5va1 d3c96a1 d2gmha1 d1pj5a2  
d1gpea1 d1o5wa1 d1n4wa1 d1k0ia1 d2dw4a2 d2ivda1 d1seza1 d2voua1  
d1kdga1 d1s5ja1 d2hbja2 d2igia\_ d1wlja\_ d1qhta1 d4dlea1 d1tgoa1  
d2f96a1 d3tr8a1 d3mxma\_ d1y97a1 d1w0ha\_ d1kfsa1 d2py5a1 d1noya\_  
d1d5aa1 d1yt3a3 d2guia\_ d3mwpal d4kb1a\_ d2av4a1 d1mpya2 d1kw3b2  
d1kw3b1 d4ghga1 d1tfza1 d3isqa1 d3isqa2 d1sqia1 d1sqia2 d1lkda2  
d1lkda1 d1cjxa2 d1cjxa1 d1sp9b2 d1t47a1 d1t47a2 d1flua2 d1sp8a1  
d1sp8a2 d1flua1 d3nvva1 d1krha3 d2h88b1 d1n62a2 d1t3qa2 d1zoyb1  
d1jq4a\_ d1ffva2 d1dgja2 d1rm6c2 d1jmxal d1pbya1 d1pbya2 d1r7ha\_  
d1faaa\_ d1wika1 d1xfla\_ d1ttza1 d2f51a1 d1ti3a\_ d1nhoa\_ d1sena\_  
d2i4aa\_ d1ep7a\_ d1zmaa1 d1fo5a\_ d3lefa1 d3diea1 d2yana1 d1z6na1  
d1oaza\_ d3zywa1 d4aj8a\_ d1nm3a1 d4fiwa\_ d1wmja\_ d4hs1a1 d1iloa\_  
d1xwaa1 d1wjka1 d2vm1a\_ d1fb6a\_ d1gh2a\_ d1h75a\_ d1nw2a\_ d1kx5b\_  
d3a6na\_ d4m6ba2 d2nqbd\_ d3wkjd\_ d2yfwe\_ d4h9na\_ d5bnxa\_ d1kx5c\_  
d3r45a\_ d1eqzb\_ d4jjnb\_ d1f66c\_ d1eqza\_ d4wnnb\_ d1kx5a\_ d1u35c1  
d1id3a\_ d2nqbc\_ d1kx5d\_ d1ku5a\_ d1f1ea\_ d1b67a\_ d1tafa\_ d1tafb\_  
d1jfib\_ d1q9ca\_ d1h3ob\_ d2byka1 d1n1ja\_ d4g92b\_ d1bh9a\_ d1jfia\_  
d1h3oa\_ d2bykb1 d1n1jb\_ d1pd212 d1nhy2 d2a2ra2 d1k0dd2 d1f2ea2  
d1gsua2 d1f3ba2 d2fhea2 d2pvqa1 d1tw9a2 d1oyja2 d1e6ba2 d3ik7a1  
d4is0a1 d1r5aa2 d1j1va2 d1m0ua2 d3gtub2 d1z9ha2 d1okta2 d1axda2  
d2gsra2 d1tu7a2 d1k3ya2 d1zgma1 d1b48a2 d1gnwa2 d1gwca2 d2gsta2  
d1glqa2 d1oe8a2 d1pn9a2 d1v2aa2 d1fw1a2 d1duga2 d1iqca2 d1iqca1  
d1eb7a2 d1eb7a1 d1nmla1 d3wyha\_ d4g9sa1 d3gxra\_ d1qqya\_ d1gd6a\_  
d1livma\_ d2gv0a\_ d1iiza\_ d2z2fa\_ d1j8xa\_ d1ghla\_ d1b9oa\_ d1741a\_  
d1691a\_ d2o4wa\_ d1p37a\_ d1k28a3 d1xjta1 d1jtma\_ d2f2qa\_ d4e97a1  
d2pjsa1 d1k1la\_ d2i7ra1 d1ecea\_ d1xqaa1 d5cj3a1 d1npba\_ d1jifa\_  
d2p7oa\_ d1nkia\_ d1y14b1 d2nn6i1 d1i941\_ d2zjra2 d1smxa\_ d2qamc2

d1hh2p1 d2r7da1 d1rl2a2 d1wfaq1 d3bzka4 d1x6oa2 d3a0ja\_ d2j01d2  
d2ja9a1 d4ql5a\_ d1hr0w\_ d1luza\_ d2n3sa\_ d2vnud1 d1h95a\_ d1go3e1  
d2nn6h1 d1ne3a\_ d2mo1a\_ d1liz6a2 d1jjga\_ d1e3pa2 d2ix0a3 d2ix0a2  
d21xja\_ d1ueba3 d1ueba2 d2z0sa1 d1u0la1 d2ix0a1 d2eifa2 d2je6i1  
d3i2za1 d2c35b1 d2ahob2 d1t9ha1 d3i4oa\_ d2qall1 d1jt8a\_ d2nn6g1  
d1g6pa\_ d3cama\_ d1i94q\_ d1c9oa\_ d1d7qa\_ d2ba0a1 d2vnud2 d2vnud3  
d1khia2 d2qalq1 d1wi5a1 d1xtda2 d1ny4a\_ d2bema\_ d1pama1 d1ea9c1  
d1qhoa1 d2fhfa2 d2fhfa1 d1k3ia1 d1j0ha1 d1csla1 d2bhua1 d1edqa1  
d1flsa2 d1ut9a2 d1gvia1 d1txka1 d1s5ja2 d1qhta2 d4dlea2 d1tgoa2  
d3py8a2 d1q8ia2 d1kfsa2 d2py5a2 d1qsta\_ d2beia1 d4m3sa\_ d1u6ma1  
d1ygha\_ d1yk3a1 d3dr6a\_ d1xmta\_ d1z4ea1 d2ge3a1 d1bo4a\_ d2fiaa1  
d2jdca1 d1y9wa1 d3to7a\_ d1wwza1 d2fl4a1 d2ozua1 d2b5ga\_ d2cy2a1  
d2p0wa\_ d1cm0a\_ d4pswa\_ d1yrea1 d1yr0a1 d1m4ia\_ d2gana1 d1yvka1  
d1ghea\_ d2g3aa1 d1y7ra1 d2euia1 d1q2ya\_ d2fsra1 d1xeba\_ d2ae6a1  
d1qsma\_ d2aj6a1 d1y9ka1 d1i12a\_ d1vkca\_ d2atra1 d1n71a\_ d2d4pa1  
d2fiwa1 d2fe7a1 d1tiqa1 d2ou2a\_ d1yx0a1 d2fcka1 d1p0ha\_ d2j8ma\_  
d2pq8a\_ d1z4ra1 d1s3za1 d1ufha\_ d1dgsa2 d1fvia1 d1ckma1 d1x9na2  
d2hqya1 d2hqya2 d1lrza2 d1ne9a1 d1ne9a2 d1xvqa1 d1pn0a2 d3hy2a\_  
d2cvba1 d1o8xa\_ d1lu4a\_ d1we0a1 d2bmx1 d2a4va1 d1psqa\_ d1xiya1  
d1q98a\_ d1n8ja\_ d1zofa1 d2ggta\_ d3tjja\_ d4je1a1 d1o73a\_ d3s9fa\_  
d2zcta\_ d1qmva\_ d1jfua\_ d2b1ka\_ d5dvba1 d2b5xa1 d2v2ga\_ d1st9a\_  
d3tb2a\_ d4llra\_ d4fh8a1 d1e2ya\_ d1knga\_ d2h30a\_ d1i5ga\_ d2z9sa\_  
d2f8aa1 d1tp9a1 d2b7ka\_ d1nm3a2 d3hvva\_ d2wfca1 d4kcea\_ d1xvwa1  
d4gqca1 d3qpma\_ d4k1fa\_ d1zsoa1 d1gpla\_ d1prxa\_ d4od7a1 d1z6ma1  
d4mcua1 d4dvca1 d1r4wa\_ d3l9sa\_ d1un2a\_ d3rppa\_ d2qked\_ d4ksoa\_  
d1t4za1 d1wwja\_ d1e88a1 d1l6ja5 d1l6ja4 d1eaka4 d1eaka3 d1l6ja3  
d1h8pa2 d1w52x1 d2ppla1 d1hpla2 d1lpbb2 d2oxea1 d1bu8a2 d1rpla2  
d1n9wa1 d1bbua1 d1e1oa1 d1c0aa1 d1b8aa1 d3a74a1 d1eova1 d1lgya\_  
d4l3wa\_ d1llfa\_ d1gz7a\_ d1lukca\_ d3ia2a\_ d4dgqa1 d1hkha\_ d1zoia\_  
d2ddfa\_ d3zxha\_ d1cgl1 d1rm8a\_ d1eaka2 d1hy7a\_ d2jsda\_ d1cxva\_  
d1hv5a\_ d1i76a\_ d3p0ya1 d1lgra1 d1lgra2 d1n8yc2 d1n8yc1 d1m6ba2  
d1m6ba1 d4dv8a2 d2tbvc\_ d1c8nc\_ d1x36a\_ d1smvc\_ d1ng0c\_ d4sbvc\_  
d1f2nc\_ d1cixa\_ d1y29a\_ d1v7fa\_ d2jtba\_ d1d1ha\_ d1g9pa\_ d1lupa\_  
d1qk7a\_ d2a2va\_ d1niya\_ d1i25a\_ d1hvwa\_ d2mpqa\_ d1ie6a\_ d1kqha\_  
d1la4a\_ d2mxoa1 d1d10a\_ d1koza\_ d1qk6a\_ d1emxa\_ d1lqra\_ d1c6wa\_  
d1rmka\_ d1ixta\_ d1eyoa\_ d1cnna\_ d1fu3a\_ d1glpa\_ d1fyga\_ d1rypd\_  
d1lirua\_ d1rypc\_ d3unfk\_ d1rypa\_ d1j2pa\_ d1lirui\_ d1j2qh\_ d3unfh\_  
d1m4ya\_ d1rypb\_ d1lirul\_ d1lirug\_ d1liru2\_ d1q5rh\_ d1rypg\_ d1g3ka\_  
d1liruf\_ d1q5qa\_ d1e94a\_ d1lirub\_ d1ryph\_ d3ty6a\_ d1liruj\_ d1liruk\_  
d1rype\_ d1lirud\_ d1lirue\_ d3mi01\_ d1rypf\_ d1liruh\_ d2z3ba\_ d1liruc\_  
d3mka2\_ d1lirul\_ d1mqta\_ d1d4m3\_ d1fmd3\_ d2mev1\_ g1aym.1 d1ev13\_  
d4q4w1\_ d1rla3\_ d2x5ia\_ d1rhi1\_ g1r1a.1 g1d4m.1 g1rhi.1 d1b35b\_  
d1loopa\_ d1tme1\_ d4iv1a\_ g1pvc.1 g1fpn.1 d1fpn1\_ d4gb31\_ d1d4m1\_  
d1fmd1\_ d1ev11\_ d2wzr3\_ g1cov.1 d1qqp3\_ g1fmd.1 d2x5ic\_ d1rhi3\_



gloop.1 d1hxs1\_ d1fpn3\_ d1bev1\_ g2mev.1 d1eah3\_ d1aym1\_ d1pvc3\_  
d1qqp1\_ d1zba3\_ d1h8ta\_ d3vbhc\_ g1b35.1 g1bev.1 d1hxs3\_ g1ev1.1  
d1bev3\_ g1tmf.1 d1tmf1\_ d1b35a\_ d2mev3\_ g1eah.1 g1h8t.1 d1eah1\_  
d4q4w3\_ d1r1a1\_ d1aym3\_ d1pvc1\_ d1zba1\_ d1h8tc\_ d1loopc\_ d1tme3\_  
g1qqp.1 d4iv1c\_ g1tme.1 d1p8ba\_ d4w9ta\_ d1jvna1 d4x2ra1 d1ka9f\_  
d1qo2a\_ d4axka1 d1thfd\_ d4u28a\_ d2y88a\_ d4wd0a\_ d1vzwa1 d4lt9a1  
d3tc7a1 d3hoja\_ d1i4na\_ d3vnda\_ d3n18a1 d1geqa\_ d3nav1 d1v5xa\_  
d4a2ra1 d3tc6a1 d1ujpa\_ d4ijba\_ d1xcfa\_ d1vc4a\_ d1rd5a\_ d1qopa\_  
d3b5va\_ d2r80b\_ d1cqxa1 d1cg5a\_ d1gcvb\_ d3boma\_ d2h8fb\_ d2raoa\_  
d3bj1a\_ d4hrrb\_ d2r50a\_ d3d1kb\_ d2aa1b1 d3zhwa\_ d3hf4b\_ d3gdja\_  
d1jebb\_ d3bj1b\_ d1x9fb\_ d1wmub\_ d1gcva\_ d3bcqb\_ d3d4xb\_ d1gvha1  
d2dc3a\_ d3hf4a\_ d4yu3a\_ d3k8ba\_ d1qpwb\_ d2r80a\_ d3bcqa\_ d1v4wa\_  
d3wtgb\_ d1jl7a\_ d4esaa\_ d1a9we\_ d3d1ab\_ d1fsla\_ d4h21a\_ d1v4wb\_  
d1mwca\_ d1vhba\_ d1jeba\_ d1spgb\_ d1h97a\_ d1q1fa\_ d1tu9a1 d3d1aa\_  
d1hdsb\_ d3hyub\_ d2zfb\_ d3fs4a\_ d1oj6a\_ d1shrb\_ d4h21b\_ d4yu3b\_  
d1spga\_ d3hrwa\_ d3qqra\_ d3at5a\_ d4wchd\_ d3hyua\_ d1cg5b\_ d1uc3a\_  
d1hbra\_ d2raob\_ d1outb\_ d4esab\_ d3gdjb\_ d3qqqa\_ d1x9fc\_ d3vrf1a\_  
d1litha\_ d3mkba\_ d3d4xa\_ d3mjpa\_ d1jl6a\_ d3fh9a\_ d1outa\_ d2dc3b\_  
d1it2a\_ d3eoka\_ d3g46a\_ d1qpwa\_ d3vrfb\_ d1ch4a\_ d1x9fd\_ d1hdsa\_  
d2zfb\_ d3mkbb\_ d1or4a\_ d3wtga\_ d1a4fa\_ d3fh9b\_ d3bomb\_ d3cy5a\_  
d3at5b\_ d1x9fa\_ d2oifa\_ d4lmxb\_ d1cpcb\_ d3v57a\_ d1kn1a\_ d1cpca\_  
d4f0ta\_ d2vjha\_ d4po5b\_ d1eyxa\_ d1alla\_ d4f0tb\_ d1b33b\_ d1b8db\_  
d4h0mb\_ d1b33a\_ d2vjhb\_ d4lm6b\_ d2vmlb\_ d1allb\_ d2vjta\_ d3dbja\_  
d2vmla\_ d2vjtb\_ d4f0ub\_ d1f99b\_ d4rmpa1 d1liaa\_ d1eyxb\_ d2uulb\_  
d4lmsb\_ d4f0ua\_ d2bv8a\_ d1f99a\_ d2bv8b\_ d2c71b\_ d3dbjb\_ d4rmpb1  
d1b8da\_ d4h0ma\_ d3v57b\_ d1kn1b\_ d1liab\_ d2uula\_ d2j96a\_ g1gxs.1  
d3nqyb\_ d4gera\_ d1bqba\_ d2xqfa\_ d1ea5a\_ d1f6wa\_ d1dx4a\_ d1qe3a\_  
d4qwwa\_ d2ha2a\_ d3c8da2 d2pbla1 d1jkma\_ d1jjia\_ d1jjfa\_ d2qvba\_  
d2v9za\_ d4kafa1 d1ex0a4 d2f4ma1 d1x3za\_ d4iuaa3 d4bvva\_ d5hpga\_  
d3k65a\_ d1ki0a2 d1ki0a1 d1a0ha1 d1pmla\_ d3sp8a3 d2feba1 d1mdwa\_  
d1qxp4 d1ziva1 d1zcm1 d1cg2a1 d1yloa2 d1y7ea2 d1y0ya3 d1lflwa1  
d1vixa1 d1fnoa4 d1vhoa2 d1ysja1 d1vhea2 d1z21a1 d2fvga2 d1vgya1  
d1r3na1 d2grea2 d1xmba1 d1rtqa\_ d3rp2a\_ glucy.1 d1fuja\_ d2zchp\_  
d3w94a\_ d1si5h\_ d1lo6a\_ g2pka.1 d1cgha\_ d1kigh\_ d1a5ia\_ d3s9ba\_  
d1hj8a\_ d1ao5a\_ d2anya\_ d1q3xa1 d1gvza\_ d1azza\_ d4gsoa\_ d2f91a1  
d1iaua\_ d1gdna\_ d1eufa\_ g1fiw.1 d1eq9a\_ d4nfea\_ d2rdla\_ d1spja\_  
d1elva1 d1a7sa\_ d1ekbb\_ d1pfxc\_ d1yc0a\_ d2aiqa\_ g1fiz.1 d1fi8a\_  
d4k60a\_ d4dgja\_ d1mzaa\_ d1op0a\_ d3tjva\_ d1pytd\_ d1sgfg\_ g1gg6.1  
d2eeka\_ g1rtf.1 d1a0ja\_ d3g01a\_ d1pytc\_ d4e7na\_ d1ddja\_ d1z8ga1  
d2hlca\_ d1npma\_ d1brup\_ g1jou.1 d1sgfa\_ d1autc\_ g2hnt.1 g1kdq.1  
d1orfa\_ d3s69a\_ d4crga\_ d1fxya\_ d1bqya\_ d2ftba\_ d1pmpa\_ d2rcqa1  
d1fdqa\_ d4lkpa\_ d1sa8a\_ d1vyfa\_ d1lpja\_ d3vg7a1 d4azqa1 d1o8va\_  
d5bvqa\_ d1p6pa\_ d2qo4a\_ d1opba\_ d1yiva1 d1o1va\_ d4bvma1 d4tkba\_  
d4i3ba\_ d1bwya\_ d1ftpa\_ d1ggla\_ d4gkca\_ d3p6da1 d1kqwa\_ d2a0aa1

d1dzka\_ d4tlja\_ d2a2ua\_ d4wfva\_ d3tlda\_ d4iaxa\_ d3zq3a\_ d2nnda\_  
dli4ua\_ dlkxo\_ dlbbpa\_ dlkt7a\_ dllexsa\_ d3s26a1 d1lf7a\_ dlqfta\_  
d4gh7a\_ dlz24a1 dlqabe\_ dlxkia\_ dlew3a\_ d3bx7a\_ d4iawa1 d1n0sa\_  
d3kzaa\_ d2k23a\_ d2l9ca1 d2joza1 dlgm6a\_ d3kffa\_ d3saoa1 d1e5pa\_  
dlyupa1 dliiua\_ d3lgia\_ d3i77a\_ d2z9ia2 d4nsva\_ d1lcya2 d4jcna\_  
dlagja\_ dlos8a\_ dlp3ca\_ d1l1ja\_ dlqtfa\_ d1e69a\_ d1mv5a\_ d3g60a4  
g1ii8.1 dlewqa2 dlji0a\_ dlqhla\_ dlv43a3 d2wmfa1 dlvp1a\_ dlq2912  
d4a82a2 glf2t.1 d2d62a1 d3tuic1 d2bbsa1 d3g60a3 d2ixea\_ dlq6ha\_  
d1sgwa1 d2qi9c\_ d3rlfa1 d3b60a1 d3d31a2 d2pzea1 glxew.1 dljj7a\_  
d1oxk2 d2onka1 dlw1wa\_ dliwea\_ dlqf5a\_ dlvmaa2 dlnija1 d2p67a1  
d3ihla\_ dl0kkd2 d1ls1a2 d1slma2 dliona\_ d2v40a\_ dl dj3a\_ d3hida\_  
d2vola1 d2g0ta1 dlvcoa2 dlj8mf2 dlq3qa\_ dlxjca\_ dl p9ba\_ dlqzxa3  
dlihua2 dlihua1 d2qm8a\_ dl dj2a\_ d4ioja\_ dlcp2a\_ dlyrba2 dlhyqa\_  
d3gqba2 dl skye3 dl xp8a1 dl tf7a2 dl tf7a1 dl ye8a1 dl skyb3 d2qe7d2  
d4blta\_ d4huta\_ d3l daa2 d4hyya\_ d2i3ba1 dlcr1a\_ d3j9tb2 d3ntua2  
d1vdza1 d2z43a\_ dl e9ra\_ d1nlfa\_ d3ziaa2 d1n0wa\_ dl g6oa\_ d3ziad2  
d3j9ta2 dl pzna2 d3gqbb2 d2i49a\_ dl nafa\_ dl xvxa\_ dl ursa\_ dl h3da1  
dliuda\_ d4mlva1 dl twya\_ d3e13x\_ d2nxoa1 d4pfua\_ d3ttma\_ dl elja\_  
d2qmw1 dl us5a\_ dl y3na1 dl jeta\_ dl uqwa\_ d4f19a1 d2esna2 d3thia\_  
d3fasa1 d2uyeb\_ d2xwva1 dl r9la\_ d2fyia1 dl pb7a\_ d2ozza1 dl sw5a\_  
d1nh8a1 dl vr5a1 d2g29a\_ dl xs5a\_ d3lswa\_ d2z23a\_ d3w9va\_ d3tcha\_  
dlq35a\_ dl z7me1 d3q27a\_ dl p99a\_ dl ve4a1 d2i6ea1 d4mcoa1 d4n8ya\_  
dleu8a\_ dl zbma1 dl hsla\_ dl ixca2 dl j1na\_ dl xvya\_ dl y9ua\_ d2z22a1  
dlxoca1 d4oera\_ dl wdna\_ d5f1qa1 dl xt8a1 dl i6aa\_ d4gwoa\_ d4igta1  
dlpc3a\_ d4mmpa1 dl o63a\_ d2czla1 d2onsa2 d4mija1 d4ok5a1 d2bmfa1  
d2bmfa2 dl yksa1 dl yksa2 dl jr6a\_ d2qeqa1 d2jlqa1 dl eh3a\_ d3skpa\_  
dl dtza1 dl dtza2 dl ieja\_ dl jnfa2 dl ce2a1 dl jnfa1 dl b1xa2 dl jw1a1  
dl jw1a2 dl ryoa\_ dl h76a1 dl h76a2 dl c4oa1 d2p6ra3 d2p6ra4 dl oywa2  
dl oywa3 dl wrba1 dl w36b2 dl w36b1 dl c4oa2 d3bora\_ dl t6na\_ d2eyqa5  
d2eyqa3 d2eyqa2 d2zu6a2 dl vea\_ dl uaaa1 dl w36d1 d2g9na1 dl z3ix2  
d2rb4a\_ dl hv8a1 dl hv8a2 dl t5ia\_ dl w36c2 d2j0sa2 d2j0sa1 dl fuka\_  
d3hjha1 dl z5za1 dl qdea\_ dl z63a1 dl s2ma2 dl s2ma1 dl wp9a1 dl wp9a2  
dl gm5a3 dl gm5a4 d3dina4 d3dina3 dl q0ua\_ dl w36c1 dl z3ix1 dl nkta3  
dl uaaa2 dl w36d2 glqhh.1 d2fwra2 d2fwra1 d2v8ta\_ d3q3ma\_ dl za0a1  
dl mxra\_ d2inca\_ dl jk0a\_ d2incb\_ dl mhyb\_ d3hf1b\_ dl mtyb\_ dl r2fa\_  
d2uw1a\_ dl mhyd\_ d3n37a\_ dl afra\_ dl oquc\_ dl syya\_ dl mtyd\_ d2olza\_  
dl uzra\_ dl smsa\_ d2fkza\_ dl zuja1 dl s3qa1 d2fjca1 dl z6om1 dl veia\_  
d4dyya\_ dl jiga\_ d3gvya\_ d2pyba\_ d4cy9a1 d3bvfa1 dl r03a\_ d2cf7a\_  
dl nf4a\_ dl zs3a1 d4iwka\_ d3ka8a\_ d3np0x\_ dl lb3a\_ d4e6ka\_ dl z6oa1  
d2fzfa1 d4dyua\_ d3ge4a\_ dl jgca\_ d4am4a\_ d2z6ma\_ dl ji5a\_ dl vlga\_  
dl lkoa1 dl krqa\_ d3qz3a\_ dl o9ra\_ d2ffxj\_ dl euma\_ dl yv1a1 d2v2pa\_  
dl j30a\_ d4di0a\_ dl dpsa\_ d2cbia2 dl gqia1 d2choa2 dl oewa\_ d2qzxa\_  
d2asia\_ dl miqa\_ dl smra\_ d2h6ta\_ dl pfza\_ dl izda\_ d3hd8a\_ dl j71a\_  
dl dpja\_ d4aa9a\_ dl t6ex\_ glb5f.1 gllya.1 glhtr.1 dlqdma2 dl bxo\_

d1wkra\_ d1tzsa\_ d1libqa\_ d2qzwa\_ d1ex4a2\_ d1c6va\_ d1bdqa\_ d3ggta\_  
d3ixoa\_ d1mrxa\_ d2haha\_ d1tw7a\_ d4njsa\_ d1sgua\_ d2p3da\_ d1nsoa\_  
d3d3ta\_ d2rkfa\_ d1c6ya\_ d2rspa\_ d3ogpa\_ d3ekwa\_ d2o4na\_ d2j9ja\_  
d1baia\_ d3ggua\_ d3lzua\_ d4npua\_ d4j55a\_ d2r8na\_ d2fxda\_ d2p3ca\_  
d4dqa\_ d3ttpa\_ d3t3ca\_ d2p3aa\_ d2hc0a\_ d2fdda\_ d3mwsa\_ d1js3a\_  
d3rcha\_ d3k40a\_ d1k8rb\_ d1wgra1\_ d1ef5a\_ d1wfy1\_ d1e8ya3\_ d1wgya1  
d1lfda\_ d2cs4a1\_ d1wxma1\_ d2byea1\_ d3kh0a1\_ d2byfa1\_ d1wxaa1\_ d1e7ua3  
d1h4ra3\_ d4yl8a1\_ d2a16a3\_ d1wgda1\_ d1wgga1\_ d4q5eb\_ d1wjna1\_ d1se9a\_  
d3n3kb\_ d1wz0a1\_ d1we6a1\_ d2m0xa\_ d2gbka\_ d3rt3b1\_ d1wh3a1\_ d1sifa\_  
d2ekec2\_ d4ii2b1\_ d4hk2a1\_ d1c3ta\_ d1m94a\_ d1wgha1\_ d1ttna1\_ d1wx8a1  
d3v6cb1\_ d2ma9b\_ d4i61b1\_ d1bt0a\_ d2jvca1\_ d1iyfa\_ d2k1fa\_ d1wxva1  
d1wf9a1\_ d1t0ya\_ d2io0b2\_ d1x1ma1\_ d2gbma\_ d1zw7a1\_ d2m17a\_ d1ud7a\_  
d1we7a1\_ d2lwp1\_ d2gbja\_ d1wjua1\_ d1v6ea1\_ d1v86a1\_ d4eewa\_ d1wiaa1  
d4icva\_ d4gu2a\_ d1wx7a1\_ d1wy8a1\_ d4hjka1\_ d2faza1\_ d1v5oa1\_ d1wioa4  
d1ccza2\_ d1vcaa1\_ d1dr9a2\_ d1ic1a1\_ d2d9qb1\_ d2nxyb2\_ d1um8a\_ d1ixza\_  
d1qvra2\_ d1qvra3\_ d1qzma\_ d1sxjc2\_ d1jr3d2\_ d2p65a\_ d1l8qa2\_ d1g8pa\_  
d3hu3a3\_ d1sxjd2\_ d1njfa\_ d1in4a2\_ d1sxja2\_ d1tuea1\_ d2ce7a2\_ d1w5sa2  
d1sxjb2\_ d1d2na\_ d1ny5a2\_ d1ofha\_ d2gnoa2\_ d2a5yb3\_ d1fnna2\_ d1u0ja1  
d1l1v7a\_ d2fnaa2\_ d1ixsb2\_ d4gita\_ d1sxje2\_ d1g41a\_ d2e3fa\_ d1mm0a\_  
d2e3ea\_ d2l1da\_ d2ny8x\_ d2e3ga\_ d2ny9x\_ d2nz3a\_ d2l1j7a\_ d1n4na\_  
d2m8bb1\_ d2kyqa\_ d3psma\_ d1jkza\_ d1jxca\_ d2g11a\_ d1ugla\_ d4uj0a\_  
d2k4ua\_ d1hp2a\_ d2l1u9a\_ d1baha\_ d2meoa1\_ d1wm7a\_ d1hlya\_ d1n8ma\_  
d1jlza\_ d1wpda\_ d1pvza\_ d1wt7a\_ d1rjia\_ d1wz5a\_ d1m2sa\_ d1pjva\_  
d1c49a\_ d1qkya\_ d2ktca1\_ d1wmta\_ d1du9a\_ d1j5ja\_ d1r1ga\_ d1t0za\_  
d2i61a\_ d1t1ta\_ d1sn4a\_ d1kv0a\_ d2lkba\_ d1npia\_ d1wwna\_ d1pe4a\_  
d2kbka\_ d2li7a\_ d1djta\_ d2kbha\_ d1dq7a\_ d1sega\_ d1omya\_ d1zywa1  
d1jzaa\_ d1bn1a\_ d1dy2a\_ d1ixra2\_ d1iyjb4\_ d1iyjb5\_ d1iyjb3\_ d1o7ia\_  
d4ipca1\_ d1x3ea\_ d4apva\_ d1jb7a1\_ d1jb7a2\_ d1jb7a3\_ d3kdfa\_ d1ue1b\_  
d1wjja1\_ d3eiva\_ d1xjva2\_ d1xjva1\_ d2ccza2\_ d1se8a\_ d1l1oc\_ d1jb7b\_  
d1qvca\_ d3ulla\_ d1qzga\_ d1mia4\_ d1mia5\_ d1mia3\_ d3ubub\_ d1egia\_  
d1qo3c\_ d1v7pa\_ d1tdqb\_ d3ubua\_ d1c3ab\_ d1h8ua\_ d3bx4b\_ d1t8ca1  
d1sb2a1\_ d1qdda\_ d2ziba1\_ d3cada\_ d1byfa\_ d1j34b\_ d1jwia\_ d1jzna\_  
d1c3aa\_ d1oz7b\_ d1wmza\_ d3bdwb\_ d1hq8a\_ d1fifa1\_ d3hupa\_ d1wk1a1  
d1umra\_ d2afpa\_ d3bx4a\_ d1gz2a\_ d1sl6a\_ d1v7pb\_ d3g8ka\_ d1ixxa\_  
d1j34a\_ d1jwib\_ d1g1sa1\_ d1y17a1\_ d1ja3a\_ d1fvub\_ d3bdwa\_ d1sb2b1  
d1fvua\_ d1umrc\_ d1oz7a\_ d4m17a\_ d3cfwa1\_ d1ypqa1\_ d1g1ta1\_ d3fd4a\_  
d3l9jc\_ d4dn8a1\_ d1v41b\_ d1rd11\_ d2msba\_ d1prtc2\_ d1pfsa\_ d2a1ka\_  
d1rpma\_ d2shpa1\_ d1yfoa\_ d1l8ka\_ d2ooqa1\_ d1g4us2\_ d1p15a\_ d1lara2  
d1wcha\_ d2fh7a2\_ d2fh7a1\_ d1ohea1\_ d1ohea2\_ d2f4da\_ d1rxda\_ d2hxpa\_  
d1xria\_ d1d5ra2\_ d1fpza\_ d3ezza\_ d4y2ea\_ d1c11a\_ d41bqa\_ d1a78a\_  
d1slta\_ d4no4a\_ d3zsja\_ d3duia\_ d1is3a\_ d1qmja\_ d1hlca\_ g1qmo.1  
g1len.1\_ d3zyra\_ d1fnya\_ d1n47a\_ g2ltn.1\_ d1avba\_ d3usua\_ d1dhkb\_  
d1f9ka\_ d1lukga\_ d1g8wa\_ d1g9fa\_ d1wbfa\_ d3wcsa\_ d1g7ya\_ g1loe.1  
d1mvqa\_ d1hq1a\_ d1dbna\_ d1qnwa\_ d1fx5a\_ d4l8qa\_ d1ioaa\_ d3n35a\_

d3ubra\_ d1qo8a1 d1d4ca1 d2k3va\_ d1ft5a\_ d1qdba\_ d1m1qa\_ d2j7aa\_  
d1h21a\_ d1ogyb\_ d4fasa\_ d1oaha\_ d1sp3a\_ d3h33a\_ d1rwja\_ d19hca\_  
d1os6a\_ d3bxua\_ d3h4na\_ d1i77a\_ d3caoa\_ d1j0pa\_ d2ctha\_ d1duwa\_  
d1ofwa\_ d2e84a\_ d1hh5a\_ d1gyoa\_ d3h34a\_ d1dszb\_ d1a6ya\_ d3cbba\_  
d1ynwa1 d1r4ia\_ d1hcqa\_ d2hana\_ d2hanb\_ d2enva1 d1kb4b\_ d2n1lb\_  
d1lola\_ d1cita\_ d2dara2 d2dara1 d1wyha2 d2dloa2 d1rutx4 d1rutx3  
d2cuqa2 d1x41a2 d1x41a1 d1x3ha2 d1x3ha1 d2d8za1 d1x61a2 d1x6aa1  
d1x6aa2 d2cora2 d2cora1 d1v6ga1 d1v6ga2 d2d8za2 d1x64a1 d1x64a2  
d1b8ta1 d2co8a1 d1x63a2 d2dj7a2 d2dj7a1 d2cu8a2 d2cu8a1 d1g47a2  
d1g47a1 d1wyha1 d2dloa1 d1wiga1 d1wiga2 d2cupa2 d2cupa3 d1x68a1  
d2d8ya2 d2d8ya1 d1m3va2 d1x62a1 d1x68a2 d1x61a1 d1b8ta3 d1b8ta2  
d2d8xa2 d2d8xa1 d1x4ka1 d1x4ka2 d2cuqa1 d1m3va1 d2co8a2 d1j2oa2  
d1x63a1 d2cura1 d2cura2 d1x62a2 d1op9a\_ d1y01a1 d1letzb1 d1egj11  
d2gsib1 d1nj9a1 d4jfhdl d1aqk11 d1t2ja\_ d1lo4h1 d1zvyal d3v4v11  
d4enec1 d1kxtb\_ d5e8ea1 d2pxya\_ d4weud\_ d1xiwc\_ d2esvd1 d1qznh\_  
d1ogae1 d1f4xh1 d4n1hb\_ d3ezjb1 d3mlw11 d1kfah1 d1etza1 d1b4jh1  
d3cfic\_ d4w68a\_ d2arja1 d1ek3a\_ d2ok011 d1vera\_ d1luwgh1 d1blnb1  
d1fpth1 d1rzga1 d2giya1 d4m3kb1 d1nc2a1 d2nyyd1 d1ncna\_ d1fbih1  
d5dxwa\_ d4fqqa1 d1dqdh1 d1jfq11 d1kelh1 d1faih1 d1frgl1 d1figl1  
d4m6n11 d1fo0a\_ d4hxb11 d3b5ga\_ d3quyd1 d2h9gb1 d1i8kb\_ d2dd8h1  
d2ck0h1 d1eaja\_ d4w6wb1 d2a6ib3 d1t66d1 d2e27h\_ d1ob1b1 d1f11b1  
d2v7na1 d1ad0a1 d2xt1b1 d1pskh1 d4i13b1 d2op411 d1a0ql1 d1luwel1  
d1za3a1 d1ncb11 d4uu9a\_ d1bm3h1 d1cloh1 d1nqba2 d1cf8h1 d4y5va\_  
d1mhph1 d5anma1 d4cdgc1 d4ldeb\_ d1y01b1 d2pcpb1 d1z3gl1 d1dfb11  
d1fh5h1 d3g5xa1 d1tzib1 d4dn311 d3zhka1 d2b1hh1 d2uylal d1f3dh1  
d1nj9b1 d2agjh1 d2h1pl1 d1q72h1 d8fabb1 d1ndmb1 d1rjca1 d4u6hb1  
d3upca\_ d2fbj11 d1osph1 d1tvda\_ d2cjev\_ d4fhbd1 d1bd2d1 d1rz7h1  
d3nn8a\_ d1blna1 d1knoa1 d1nfda1 d2bmkb1 d1dq11\_ d1igyb1 d1igf11  
d12e8h1 d3utza1 d1nc2b1 d1rihh1 d4mwfb1 d4jvpa1 d1mieh1 d1rhfa1  
d1fgn11 d1sbsh1 d1lp9e1 d1dn0a1 d4lqf11 d1iaih1 d1kgcd1 d1mh5b1  
d1gpol1 d2g60h3 d1f8t11 d2jixd1 d4grwh\_ d1fo0b\_ d1bfob1 d1axsa1  
d1u9ka\_ d1nmbh\_ d1h8na1 d1h8na2 d1jguh1 d4eura1 d3sdy11 d35c8h1  
d1w7211 d1mvub\_ d1i9rh1 d1ob1a1 d4wenb\_ d1yeeh1 d3ietc1 d1f58h1  
d1ad0b1 d1mqk1\_ d1nbvh1 d4b50a\_ d3r8bb\_ d1baf11 d1mamh1 d4rgne1  
d2gsgb\_ d35c811 d1bafh1 d1ai1h1 d2pcpa1 d2fath1 d2x1pa\_ d1orsb1  
d1libg11 d1shma\_ d1a2yb\_ d1u0qa\_ d2coqa\_ d1hilb1 d1qfwi\_ d1jv5b\_  
d1fn4b1 d5e0qa\_ d1nsnh1 d1plgl1 d4ocx11 d1kb5h1 d1rzhf1 d1pg7x1  
d2fx7h1 d2oi9c\_ d1l7i11 d3eyva1 d1d5i11 d4ffyl\_ d1tet11 d1a6wh\_  
d1ac6a\_ d3dvfa\_ d1nfde1 d1mimh1 d1ri8a1 d1jhlh\_ d3dura\_ d1fskb1  
d1f97a1 d3so3b1 d2ak4d1 d1lp9f1 d4z7wf1 d1l7th1 d4y5ya\_ d4x7ec1  
d1emth1 d1ikf11 d1nlbh1 d4uta11 d1bjma1 d1eapb1 d1u6ah1 d2dtgd1  
d1kj2b\_ d1xeda1 d1cleh1 d1fgvh\_ d2bnub1 d2fb4h1 d2dtgb1 d1ktrh\_  
d1jpth1 d1qkz11 d4hepg\_ d2atpb1 d1flrh1 d2hrpl1 d1mvfa\_ d1iaim1  
d3k80a1 d2jb5h1 d3zkxc\_ d4grwe\_ d1it9h1 d1rhhb1 d3w9ec\_ d1e4wh1

d1sy6h1 d2j6eh1 d3qxta\_ d1jglh1 d1p7ka1 d1tzhb1 d4n8pa1 d1gaf11  
d2jelh1 d1wioa2 d4i0cc1 d1cicb1 d1lmka2 d1lmka1 d1iqwh1 d1lorqb1  
d1ejoh1 d1jnlh1 d4zg1a\_ d43c9b\_ d1ggbl1 d1wejh1 d3q6fa1 d1f3dj1  
d3c6la1 d1bqlh1 d3p9wb\_ d1a3r11 d1h0db1 d2uzil\_ d1eo811 d1qfwl\_  
d1n7m11 d1ligja1 d1c5ch1 d2a9mh\_ d1rmfh1 d1fj1b1 d4heme\_ d1ccza1  
d1a5fh1 d1ogad1 d1dlfh\_ d1qa9b\_ d1vge11 d3qskb\_ d1sjxa\_ d4ozfg1  
d1sq2n\_ d1qd0a\_ d1kcvh1 d1c5db1 d3qcul1 d8faba1 d3bn9d1 d1mjuh1  
d4y8dc\_ d7fabh1 d3dvgb1 d1lo011 d1a6tb1 d1gigh1 d1kcrh1 d2hwz11  
d1yjdc1 d3clfl1 d4krna\_ d1dl7l\_ d1e6ol1 d1mexh1 d3r0ma\_ d4kkna\_  
d1fns11 d1loaqh\_ d1rzia1 d1ucbh1 d1ncw11 d4b41a\_ d1nfd11 d2mpah1  
d2d7t11 d4grwf\_ d4b5ea\_ d1lk3h1 d3u79a\_ d4u3xa\_ d1ghfl1 d1bvkb\_  
d1mcww1 d1b88a\_ d1jrhh1 d32c2b1 d4wemb\_ d1dsfh\_ d1op3h1 d1cell1  
d1iqda1 d1qoka1 d1qoka2 d1qfuh1 d2crya1 d1ay1h1 d1loaq1\_ d3ab0b\_  
d1rur11 d1t4kb1 d1bz7b1 d1n0xh1 d1for11 d1ucbl1 d4w6yb\_ d43c9a\_  
d2aab11 d1tzia1 d4n1ca\_ d1k6qh1 d3g9ab\_ d4tvsa1 d1ligmh\_ d1pz5b1  
d3dx9a1 d3wxwh\_ d1nakh1 d1kcull1 d3eaka\_ d4qlra1 d1cr911 d1d9ka\_  
d1f4x11 d1deea1 d2i27n2 d1c12a1 d2orb11 d1j8hd1 d1mcph1 d1c5da1  
d1kenh1 d1bd2e1 d1h5ba\_ d4x7fc1 d3upaa\_ d1t3fa1 d1indh1 d2dtgc1  
d4hc111 d1zv5a1 d4wgvb\_ d1uwgl1 d4f37k1 d1aqkh1 d1vesa\_ d3zkqd\_  
d1fpt11 d1lo411 d1knob1 d3rrqa\_ d1ct8b1 d4orz\_ d1mlbb1 d4hgkc1  
d1dqd11 d1bogb1 d4ozhe1 d1dr9a1 d1i7za1 d1dn0b1 d1kell1 d1rzib1  
d1ypzf1 d1wtla\_ d1hkfa\_ d1fail1 d1figh1 d2vyre\_ d1sjva\_ d1ohqa\_  
d1bfoa1 d1pkqb1 d1mjul1 d1b4j11 d1nsn11 d2arjb1 d1p4bh\_ d4aj0a\_  
d3nn8b\_ d2rcja1 d1f2xk\_ d4v1dd\_ d1adqh1 d2eksa\_ d4k3ga\_ d1jfqh1  
d1uweh1 d1frgh1 d4gftb\_ d1uz8b1 d4n1ea\_ d1bm311 d1clol1 d3mcka1  
d2vq1a1 d1ae6h1 d4aq1b1 d1uj3b1 d1nbqa1 d1fh511 d2ck011 d2ywza\_  
d1q7211 d4nxbx\_ d1hila1 d4hz1b1 d2j8811 d1zmya1 d1cd0a\_ d1a4ka1  
d1psk11 d1a0qh1 d4krmb\_ d1ncbh1 d2fbjh1 d1j8he1 d1i3ua\_ d1cf811  
d1fe8h1 d2p1ya1 d1eeqa\_ d2x89a\_ d1ol0a\_ d2r0lh1 d1ub5a1 d1dfbh1  
d3eyvb1 d4jdvb1 d4p2cg\_ d2gsia1 d2agj11 d1u3ha1 d2h1ph1 d1rih11  
d1fskc1 d1boga1 d2a7711 d1ospl1 d1qfoa\_ d3dwta\_ d2fx711 d1rz711  
d3stba1 d1pkqa1 d1b6da1 d1dzba2 d1dzba1 d1kj2a\_ d4l1ha\_ d1rzgb1  
d1dq1h\_ d12e811 d1mie11 d1jmaa\_ d1sbs11 d1fgnh1 d1f5811 d1mqkh\_  
d1ndgb1 d3qeg11 d1ia111 d2aw2a1 d1tqbc1 d3fo2a1 d4dkaa\_ d1f8th1  
d2g6011 d2ywya\_ d1uj3a1 d1yc7a\_ d3bd3a\_ d4w6xb1 d1nmb1\_ d1i8ka\_  
d1rjlb1 d1ypze1 d1p7kb1 d1kxqe\_ d1gpoh1 d2z4qa1 d1w72h1 d1i9r11  
d4qgya1 d4xt1c\_ d2qqnh1 d1cica1 d3c08h1 d2cd0a\_ d2bdnh1 d1hnga1  
d1mam11 d1nldh1 d1cr9h1 d4lcih1 d3bkyl1 d3qg711 d1ai111 d1kxvc\_  
d4iosd\_ d1l7ih1 d2x1qa\_ d1ub6b1 d3k74b\_ d1ibgh1 d1teth1 d1igya1  
d1hxma1 d2x6ma\_ d2e71a\_ d5e03a\_ d1qfwm\_ d2r0kh1 d1igjb1 d1rurh1  
d1plgh1 d1mj8h1 d1yuhb1 d3fmg11 d1rzf11 d1emt11 d1ad9b1 d1igtb1  
d1nlb11 d1d5ih1 d3k7ua\_ d4ffyh\_ d1bwwa\_ d3dvga1 d1a6ta1 d1fgvl\_  
d4qxgl1 d1mim11 d1jh11\_ d2hffb1 d2hh011 d1qkzh1 d1l7t11 d1afvh1  
d1iaii1 d2cjuh\_ d1um5h1 d2ghwb2 d2ghwb1 d1kgce1 d2fgwh1 d1ikfh1

d1dvfd\_ d2i24n1 d2xtjb\_ d1za3b1 d2yc1a\_ d2hh0h1 d2x1oa\_ d1bvka\_  
d1rjla1 d5e7ba1 d1igta1 d1il1b1 d2fb4l1 d1mvua\_ d32c2a1 d1fvca\_  
d1iqdb1 d2hrph1 d2p4ab\_ d4qo1a\_ d1p2cb1 d1wt5c\_ d1t4ka1 d5c1mb\_  
d1it9l1 d1bz7a1 d1b2wh1 d1e4wl1 d1jnl11 d1yedb1 d1za6b1 d3u7aa\_  
d1igfh1 d3gnml1 d1orsa1 d1wejl1 d1a2ya\_ d1hxmb1 d1gafh1 d2j4wh1  
d1pz5a1 d1j05a\_ d1a3rh1 d4fq1l1 d1qfwh\_ d1eo8h1 d1n7mh1 d4s11a\_  
d1kegh1 d5da4a\_ d1iqwl1 d3whxb1 d1vgeh1 d1deeb1 d1c12b1 d1t2ql1  
d1ad9a1 d3gsnb1 d3b2uc1 d1ggbh1 d1t3fb1 d1nakl1 d4ocmc\_ d1lila1  
d2v7hb3 d2esve1 d1mcoh1 d2qr0b1 d2q3aa\_ d1ct8a1 d1kcr11 d2pxyb\_  
d2uzih\_ d5c3ld\_ d3durb\_ d1c5c11 d2ak4e1 d1dl7h\_ d1xiwd\_ d1mlba1  
d1rmfl1 d1i7zb1 d1dlfl\_ d2xa3a\_ d5bq7b1 d1dqqb1 d3h42l1 d1egjh1  
d1kcvl1 d1fe8l1 d2j6e11 d1f3rb2 d1lk3l1 d1sm3h1 d1q0xh1 d1ghfh1  
d7fabl1 d1igch1 d1l00h1 d4idla\_ d5c2bl\_ d1jrh11 d1l11a1 d3zhda1  
d4kfzc\_ d1b0wa\_ d1e6oh1 d1mexl1 d4krpb\_ d1fnsh1 d1ncwh1 d4hgma\_  
d4eigb1 d4rzca\_ d2mpal1 d4y5xa\_ d5en2b1 d3lrga1 d4ej1c1 d1rhha1  
d1j05b\_ d1forh1 d1q9wb1 d2wzpd\_ d2aq2a1 d1h0da1 d3revb1 d2ij0c1  
d1tzh1 d4m7j11 d1k6q11 d3b9kc1 d1igml\_ d3geua1 d1dsfl\_ d1celh1  
d1kcu1 d1zvha1 d1zvoa1 d1tqbb1 d1ay1l1 d2qsc11 d2cgrh1 d1nl0h1  
d1ken11 d3eo0a1 d4n9ob1 d1n0xl1 d3k1kc\_ d2aq2b1 d1ck1a1 d1enf11  
d1i4pa1 d1v1oa1 d1et9a1 d1esfa1 d2g9hd1 d4ohja1 d1klud1 d1bxta1  
d1eu3a1 d1ty0a1 d1fnua1 d2cqva1 d1fhga\_ d2k1ma\_ d2dl2a1 d1biha3  
d1biha1 d1biha4 d3qp3a1 d1g1ca\_ d1gxea\_ d1cvsc2 d1cvsc1 d1xmwa2  
d1m4ka2 d2otpa2 d1biha2 d1rhfa2 d2fcba2 d2fcba1 d1wwbx\_ d1gsma2  
d1epfa1 d1epfa2 d2dava1 d1waaa\_ d1f97a2 d1x44a1 d1vcaa2 d1fnla2  
d1fnla1 d3b5ha2 d3h8na2 d3h8na1 d1jbja1 d1jbja2 d1pd6a\_ d1f2qa2  
d1f2qa1 d3cx2a\_ d1nbqa2 d3b5ha1 d1n26a1 d1xiwb\_ d1xaua\_ d1fltx\_  
d2ifga1 d1olla1 d1olla2 d1cs6a4 d1cs6a3 d1cs6a2 d1cs6a1 d2gw5a2  
d1sy6a1 d1xiwa\_ d1lucta2 d1lucta1 d1ry7b2 d1gl4b\_ d1qz1a3 d1olza1  
d2c9aa1 d1wwca\_

**Family-44 (c.1.2.4)**

**Positive dataset contains 12 protein sequences.**

d4lt9a1 d3tc7a1 d3hoja\_ d3vnda\_ d3nl8a1 d3nav1 d4a2ra1 d3tc6a1  
d4ijba\_ d1xcfa\_ d1rd5a\_ d3b5va\_

**Negative dataset contains 4001 protein sequences.**

d1m32a\_ d1libja\_ d1c7na\_ d1iuga\_ d4q75a\_ d2bkwa1 d1t3ia\_ d1n8pa\_  
d1qz9a\_ d1jff9a\_ d1eg5a\_ d1p3wa\_ d3kgwa\_ d1cl1a\_ d2ctza1 d1vjoa\_  
d2rfva\_ d1gc0a\_ d1cs1a\_ d1d2fa\_ d2ch1a1 d1qgna\_ d1pffa\_ d1elua\_  
d1u08a\_ d1lc5a\_ d1b5pa\_ d2ay1a\_ d3pd6a\_ d7aata\_ d2csta\_ d1j32a\_  
d1fg7a\_ d4wlha\_ d1o4sa\_ d1v2da\_ d1gdea\_ d1m6sa\_ d1v72a1 d1svva\_  
d1ajsa\_ d1wsta1 d2f8ja2 d1lk9a\_ d1vp4a1 d1xi9a1 d2gb3a1 d1yaaa\_  
d1js3a\_ d3rcha\_ d3k40a\_ d1xkta1 d2hfka\_ d1jmkc\_ d5d3ka\_ d1ddla\_  
d1auyb\_ d1f56a\_ d1bypa\_ d1azca\_ d1ws8a\_ d3u25a\_ d1cuoa\_ d1lid2a\_  
d1rkra\_ d2iaac\_ d4dp1x\_ d1nwpa\_ d2gima\_ d2i7sa\_ d1qhqa\_ d1gyca3  
d1hfua2 d1kbva1 d1kbva2 d1sdda1 d1sdda2 d1gyca1 d1gyca2 d1mzya1

d2bw4a1 d1aoza1 d1aoza3 d1aoza2 d1kyaa2 d1kyaa3 d1kyaa1 d1mzya2  
d4e9sa1 d1sddb1 d1sddb2 d1hfua1 d1hfua3 d1oela2 d1oela1 d1v10a2  
d1v10a3 d1v10a1 g1f8v.1 d1novc\_ d2bbvc\_ g1or0.1 g1cp9.1 g1e3a.1  
d4qgna\_ d1vr3a1 d2bema\_ d1pama1 d1lea9c1 d1qhoa1 d2fhfa2 d2fhfa1  
d1k3ia1 d1j0ha1 d1cyla1 d2bhua1 d1ledqa1 d1f1sa2 d1gvia1 d1txka1  
d4alac\_ d1pjwa\_ d1rera1 d1s6na\_ d3uzqb\_ d2phla2 d2phla1 d1fxza2  
d1fxza1 d1lrha\_ d1uija1 g1dgw.1 d2v09a\_ d1uika2 d1uika1 d1fstb\_  
d1lex0a1 d1g0da1 d1v70a\_ d2f4pa1 d1yhfa1 d1yloa2 d1y7ea2 d1y0ya3  
d1l1fwa1 d1vixa1 d1fnoa4 d1vhua2 d1ysja1 d1vhea2 d1z21a1 d2fvga2  
d1vgya1 d1r3na1 d2grea2 d1xmba1 g1q71.1 d1rtqa\_ d1k9ua\_ d2opoa\_  
d1r0ka3 d1vkoa2 d1vm6a2 d3qvsa2 d1gr0a2 d1p1ja2 d2ovga\_ d1sq8a\_  
d1rzsa\_ d3kz3a\_ d3orca\_ d3gpdg2 d2q49a2 d1hdgo2 d2g17a2 d2cvoa2  
d2czca1 d3pwka2 d1i32a2 d1zyao2 d2pkqo2 d1b7go2 d2hjsa2 d1cf2o2  
d1vkna2 d1nvmb2 d2msya\_ d2djoa1 d2r5za\_ d1au7a1 d1f43a\_ d2lmda1  
d1akhb\_ d1s7ea1 d3nara\_ d1zq3p1 d2craa1 d1mija\_ d4uuta\_ d3a01a\_  
d1x58a1 d3rkqa1 d3cmya1 d2cqxa1 d2da6a1 d1e3oc1 d1fjla\_ d1mh3a1  
d1x41a1 d1wh7a1 d1gt0c1 d2mw8a\_ d1lfup\_ d1x2ma1 d1b72a\_ d1wi3a1  
d1jgga\_ d1wjha1 d1x2na1 d1mnm\_ d2cuea1 d3k2aa\_ d2hosa\_ d2jwta2  
d1pufa\_ d1octc1 d2hi3a\_ d1b8ia\_ d4j19a\_ d3lnqa\_ d1wh5a1 d1b8ib\_  
d1fexa\_ d2cqra1 d1guua\_ d1ug2a1 d2cqqa1 d2ajea1 d4a69c\_ d2crga1  
d2iw5b1 d1xc5a1 d1ofcx1 d2cu7a1 d1wgxa1 d2cjja1 d2ckxa1 d1gvda\_  
d6paxa1 d6paxa2 d1k78a2 d1xg1a1 d1hlva1 d1hlva2 d1iufa2 d1iufa1  
d1ligna1 d2iu5a1 d1zk8a1 d2g7sa1 d2fd5a1 d2np5a1 d1z0xa1 d2id6a1  
d2d6ya1 d2i10a1 d1vi0a1 d2oi8a1 d3c07a1 d2ns7a1 d2fq4a1 d2yvea1  
d1t33a1 d2o7ta1 d2np3b1 d2g7ga1 d2gena1 d2fbqa1 d2g71a1 d2gfna1  
d2g3ba1 d2jj7a1 d2hyja1 d1sgma1 d1ui5a1 d2hkua1 d2id3a1 d4jyka1  
d1b10a2 d1d5ya1 d1d5ya2 d3lv8a\_ d1s3ga1 d1zaka1 d1s4qa\_ d3tvta2  
d1uf9a\_ d1khtha\_ d1ckea\_ d1osna\_ d1p5zb\_ d4tmka\_ d3cm0a\_ d1tmka\_  
d1jaga\_ d3h86a\_ d1t0hb\_ d1nn5a\_ d2h92a\_ d3kb2a1 d2c95a1 d1yj5a2  
d1kgda\_ d1ly1a\_ d2ak3a1 d1vyva2 d1deka\_ d2grja1 d1p3ja1 d1y63a\_  
d1e4ya1 d1s96a\_ d3iija1 d1lvga\_ d1nksa\_ d1vyua2 d4e22a\_ d1qf9a\_  
d1jjva\_ d1q3ta\_ d1ki9a\_ d1lw7a2 d1teva\_ d1kjwa2 d1gsia\_ d1x6va3  
d1g3ma\_ d1j99a\_ d1t8ta1 d1fmja\_ d1zrha\_ d1ls6a\_ d2a3ra\_ d1aqua\_  
d2zptx\_ d3ckla\_ d1texas\_ d1q44a\_ d2gwha\_ d1odfa\_ d1uj2a\_ d4gi7a\_  
d2jeoa1 d1z0ja1 d3umra2 d3gj0a1 d2gaoa1 d1yzga1 d1x3sa1 d1g7sa4  
d1puja\_ d1udxa2 d1kk1a3 d2o52a\_ d1jwyb\_ d1zcaa2 d1zcba2 d2fv8a1  
d2cjwa\_ d3dz8a1 d1xzpa2 d1vg8a\_ d4qxaa\_ d2ew1a1 d1x1ra1 d2bcgy\_  
d3doea1 d3cona\_ d3regaa\_ d3wyga\_ d1upta\_ d2b6ha1 d1zd9a1 d1lnza2  
d1r5ba3 d1n0ua2 d1r2qa\_ d2f91a1 d2rhda\_ d3q3jb\_ d3q85a\_ d1efma1  
d1r8qa\_ d2gf9a1 d2akab1 d1ek0a\_ d1z08a1 d2gcoa1 d2dy1a2 d4g01b\_  
d2cxxa1 d1svia\_ d3q72a\_ d1ni3a1 d4ac9a4 d2erxa1 d2bmea\_ d1wxqa1  
d2gf0a1 d4ldja1 d1zunb3 d1d5ca\_ d4lv5b\_ d1efca3 d1kmqa\_ d2g6ba1  
d3lrpa\_ d1tada2 d2y8ea\_ d4rd4a1 d1z06a1 d2heia\_ d3a58b\_ d1u01a2  
d1d2ea3 d1zj6a1 d2ocba\_ d3rwoa\_ d1mr3f\_ d2e9sa1 d4u5xa1 d2iwra\_

d2fn4a1 d3bwdd\_ d2nzja1 d2atva1 d2ksqa\_ d3l43a\_ d1mkya2 d1mkya1  
d1wmsa\_ d1jn3ya3 d2rmka\_ d1f6ba\_ d1f60a3 d1gota2 d1jala1 d2fh5b1  
d1g16a\_ d2wblc\_ d1m7ba\_ d1wf3a1 d1f5na2 d1t9ha2 d1z6xa1 d1z0aa1  
d2fg5a1 d2a5ja1 d2bcjq2 d1s0ua3 d1ky3a\_ d4y0va\_ d4lhwa\_ d2qmea1  
d2atxa1 d1egaa1 d1ryha\_ d1moza\_ d1nrjb\_ d2erya1 d3bfka\_ d1puia\_  
d3j3az1 d3t5ga\_ d1shza2 d3defa\_ d2f7sa1 d3raba\_ d3tsoa\_ d3aq4a\_  
d2a17a1 d3sfva1 d3bc1a\_ d2ncda\_ d1sdma\_ d3h4sa1 d2heha\_ d2grya\_  
g3kin.1 d1kk8a2 d1br2a2 d1goja\_ d1f9va\_ d2mysa2 d1lkxa\_ d3t0qa\_  
d4db1a1 d3gbja\_ d1ry6a\_ d1v8ka\_ d1k8ka2 d1k8ka1 d3uleb1 d3i33a2  
d3i33a1 d1bupa1 d1dkgd2 d1dkgd1 d4ci6a2 d1jcfa1 d4a2ba2 d2fxua1  
d1yaga1 d4cbua2 d1bupa2 d1g99a1 d2e1za2 d2e1za1 d1saza1 d1saza2  
d1iqca2 d1iqca1 d1eb7a2 d1eb7a1 d1nmla2 d3h1jd1 d2d0oa3 d2d0oa2  
d1nbwa3 d1hroa\_ d4gedb\_ d3zooa\_ d1mz4a\_ d1gu2a\_ d1f1fa\_ d1dvva\_  
d1c6ra\_ d1c75a\_ d1e29a\_ d1gdva\_ d1cnoa\_ d1h32b\_ d1co6a\_ d2bh4x\_  
d2aiua\_ d5cytr\_ d1i8oa\_ d2zboa\_ d3dmia\_ d1ls9a\_ d1wvec\_ d2yk3a\_  
d3ph2b\_ d1dw0a\_ d5aura\_ d1ql3a\_ d1qn2a\_ d1f1ca\_ d2nqya\_ d1h4ga\_  
d1hixa\_ d1oa2a\_ d1olra\_ d3b7ma\_ d4h7ma1 d3wp3a\_ d2vgda\_ d3zsea\_  
d2nlra\_ d3wx5a\_ d1oa3a\_ d1pvxa\_ d1m4wa\_ d1f5ja\_ d1oa4a\_ d1ks5a\_  
d4ix1a1 d2a6za1 d3a4ua\_ d2a6va1 d1evsa\_ d1cnt1\_ d1pvhb\_ d1z7ca\_  
d1huwa\_ d1bgea\_ d1f6fa\_ d1f45b\_ d1i1rb\_ d1axia\_ d4x51a\_ d1d9ca\_  
d4ypgc1 d3oq3a\_ d1lqsl\_ d1n1fa\_ d1aula\_ d1wu3i\_ d3bes1\_ d3ux9a\_  
d1v8fa\_ d2ejca\_ d3muea1 d1ihoa\_ d3q12a1 d4dnxa2 d1v47a2 d1g8fa2  
d1jhda2 d1x6va2 d3rbaa\_ d2qtra\_ d1nupa\_ d3l92a\_ d1f9aa\_ d1qjca\_  
d2h29a\_ d1vlha\_ d1lod6a\_ d1lw7a1 d1mrza2 d4ruka\_ d2e17a\_ d1liq0a2  
d1irxa2 d1r6ta2 d1ivsa4 d2cyba\_ d1rqga2 d1j09a2 d2yxna\_ d1f7ua2  
d1h3fa1 d1ffya3 d2g36a1 d1nzja\_ d1n3la\_ d1i6la\_ d1pfva2 d1h3na3  
d3n9ia\_ d3sz3a1 d3sw2a\_ d1moxc\_ d1dx5i3 d1edmb\_ d1autl2 d1autl1  
d1nqlb\_ d1dval1 d1szba2 d1kigl\_ d2y5f1\_ d1ijqa2 d1gk5a\_ d1g1sa2  
d1nt0a3 d1xdtr\_ d1lmja2 d1lmja1 d1nzia2 d2wphe\_ d1klil\_ d1pfxl2  
d1pfxl1 d1p9ja\_ d1g1ta2 d1f7ea\_ d4yzub\_ d2y5ia\_ d1qlsa\_ d3n22a\_  
d2egda\_ d4ggfc\_ d2wcea\_ d2luca\_ d4aqia\_ d3nsia\_ d2lp3a\_ d1j55a\_  
d1a4pa\_ d1k8ua\_ d1nsha\_ d1pvaa\_ d3fs7a\_ d2pvba\_ d1ttxa\_ d1rwya\_  
d2kyfa\_ d1rk9a\_ d1a75a\_ d1exra\_ d1tiza1 d1nyaa\_ d1g8ia\_ d1ggwa\_  
d1wdcc\_ d3fwba\_ d1ggza\_ d2o5ga\_ d1ctaa\_ d1m45a\_ d3i5gc\_ d1sl8a\_  
d1fpwa\_ d2scpa\_ d2roaa\_ d4aqra\_ d3pn7b\_ d1br1b\_ d2mysb\_ d1s6ca\_  
d1bjfa\_ d2obha\_ d1jfka\_ d1j0a\_ d1qv0a\_ d1lkja\_ d2mlfc\_ d2m97a\_  
d2d8na\_ d4by5a\_ d1jbaa\_ d4nqga\_ d1wdcb\_ d2mysc\_ d1j7qa\_ d1s6ia\_  
d1uhka2 d1r2ua\_ d1dtla\_ d3kf9a\_ d3pn7c\_ d1qjta\_ d1fi6a\_ d1c07a\_  
d1sfsa\_ d1wkya2 d1uuqa\_ d3wh9a\_ d4mlra\_ d1xyza\_ d4xuya\_ d2je8a5  
d4bf7a1 d3cuia\_ d1ur4a\_ d1odza\_ d2vzsa5 d1bqca\_ d2x2ya1 d1hjqa\_  
d1qnra\_ d4y7ea1 d1vjza\_ d4k68a\_ d2v3ga\_ d4hpga\_ d1nofa2 d1nq6a\_  
d1h4pa\_ d1aq0a\_ d3ziza\_ d4bs0a\_ d1ecea\_ d1h1na\_ d1ta3b\_ d1w91a2  
d1i1wa\_ d1uhva2 d1us3a2 d1egza\_ d7a3ha\_ d1tvna1 d3nyda1 d1ghsa\_  
d2cyga1 d4xv0a\_ d2c8na2 d1w32a\_ d3emca\_ d1v6ya1 d1foba\_ d2uwfa1



d2fgla\_ d3niya1 d2c0ha1 d1rh9a1 d1yq2a5 d1szna2 d1fa2a\_ d1pama4  
d5do8a1 d1ea9c3 d1hx0a2 d2fhfa5 d1qhoa4 d1avaa2 d1m53a2 d4m8ua1  
d2gjpa2 d1lwha2 d4howa1 d1ktba2 d1j0ha3 d3vm5a1 d2x1ia\_ d1wzaa2  
d1uasa2 d2diea1 d1mxga2 d1ht6a2 d1eswa\_ d1iv8a2 d5cpsa\_ d1ud2a2  
d1zjaa1 d3gbea1 d1kwga2 d1wdpa\_ d1gcya2 d1g5aa2 d1hvxa2 d3dhpa2  
d2bhua3 d4do4a1 d3qgva1 d1e43a2 d1g94a2 d2d3na2 d1gjwa2 d1gvia3  
d1x1na1 d1r7aa2 d1tz7a1 d4toqa\_ d1wb0a1 d1w9pa1 d1itxa1 d1kfwal  
d1goia2 d1edqa2 d2gsja\_ d1hjxa1 d1jnda1 d1vf8a1 d3wdpp1 d3wq5a\_  
d1gnxa\_ d4gxpa\_ d4hz8a\_ d1e4mm\_ d3aiua\_ d1wcga1 d1qvba\_ d3ahxa\_  
d1v02a\_ d2dgaa\_ d1pbga\_ d1vffa1 d1qoxa\_ d4ha4a\_ d1t77a2 d1mixa2  
d1e5wa2 d1isna2 d2a16b2 d3syxa1 d1mkea1 d2p8va\_ d1xoda1 d1i7aa\_  
d1evha\_ d1qc6a\_ d1legxa\_ d1id1a\_ d2hmta\_ d1ix2a\_ d3nvva1 d1krha3  
d2h88b1 d1n62a2 d1t3qa2 d1kf6b2 d1zoyb1 d1ffva2 d1dgja2 d1rm6c2  
d1h6ua1 d91dta1 d2ewda3 d1up7a1 d2dfda1 d1s6ya1 d1vjta1 d7mdha1  
d1hyea1 d1t2da1 d1oj3a3 d1b8pa1 d1ldna1 d1hyha1 d1civa1 d2a92a1  
d1ez4a1 d1i0za1 d1y6ja1 d1gv0a1 d1ur5a1 d1llda1 d1lobba1 d1v8ba1  
d1gdha1 d2dlda1 d1mx3a1 d1ygya1 d1qp8a1 d1li4a1 d1j4aa1 d2nacal  
d1npya1 d3t4ea2 d1a4ia1 d1o0sa1 d2hk9a2 d2egga2 d1b26a1 d1bvua1  
d1gq2a1 d1clda1 d1leha1 d1gtma1 d1euza1 d1nvtal d3dona2 d1ledza1  
d1gpja2 d1p77a1 d1nyta1 d1b0aa1 d1v16a1 d1v9la1 d1etob\_ d1umqa\_  
d1kola2 d1f8fa2 d1qora2 d1jqba2 d1vj0a2 d1cdoa2 d1gu7a2 d1d1ta2  
d1xa0a2 d2dm6a2 d1jvba2 d1llua2 d1h2ba2 d1tt7a2 d1piwa2 d1o89a2  
d1iz0a2 d1e3ja2 d1yb5a2 d1uufa2 d1vj1a2 d1e3ia2 d3gpdg1 d1vc2a1  
d2nvwa1 d1u8fo1 d1ydwal d1hdgo1 d2g17a1 d1cf2o1 d2czca2 d1r0ka2  
d1obfo1 d2cvoa1 d1ebfa1 d1h6da1 d1i32a1 d1zh8a1 d2q49a1 d1qkia1  
d1j5pa4 d3pzra1 d1xeaa1 d1vkoa1 d1vm6a3 d3qvsa1 d2pkqo1 d1b7go1  
d1gr0a1 d1p1ja1 d1lc0a1 d1j0xo1 d3pwka1 d2hjsa1 d1zyao1 d1vkna1  
d1tlta1 d1nvmb1 d3sjua\_ d3ojfa1 d1xu9a1 d2jjya1 d1n7ha\_ d1y1pa1  
d1h5qa\_ d1jtv\_a\_ d4fs3a\_ d2bkaa1 d1gy8a\_ d2c5aa1 d1ulsa\_ d1ooea\_  
d2b69a1 d1y5ma1 d1spxa\_ d1aela\_ d1bxka\_ d1ydea1 d1gega\_ d1hdoa\_  
d1o5ia\_ d1e6ua\_ d1snya1 d2rhca\_ d3zv4a\_ d5ceja\_ d2d1ya1 d1fjha\_  
d3w8ea\_ d2fmua1 d1x1ta\_ d1rpna\_ d3ay7a1 d1k2wa\_ d1eq2a\_ d2hrba1  
d3ruaa\_ d2ew8a1 d4hwka\_ d1xgka\_ d2bd0a1 d1yo6a1 d2a35a1 d2ntva\_  
d1v18a\_ d1hdca\_ d4bkua\_ d2ag5a1 d2q45a\_ d1nffa\_ d4iy1a\_ d1zbqa1  
d1kewa\_ d1ek6a\_ d1ja9a\_ d2q46a2 d1iy8a\_ d1cyda\_ d2ptga\_ d1hxha\_  
d1uzma1 d3lyla\_ d4m89a\_ d3wyea\_ d2blla1 d1w6ua\_ d1sb8a\_ d2q2va\_  
d4nr0a\_ d1e6wa\_ d2gasa\_ d3oiga1 d2bgka1 d1mxha\_ d1v10a1 d1rkxa\_  
d1r6da\_ d1wmaa1 d1e7wa\_ d2c07a1 d1xkqa\_ d3tzha\_ d1g0oa\_ d3lz6a\_  
d1qyca\_ d1ledoa\_ d1gz6a\_ d1oc2a\_ d1t2aa\_ d1zema1 d2xoxa\_ d1z45a2  
d1geea\_ d1p33a\_ d3lt0a\_ d4e6pa\_ d2wyua\_ d4q9na\_ d1xhla\_ d4o1ma\_  
d1fmca\_ d2uvda\_ d2gdza1 d1uaya\_ d2z1ma\_ d2o23a2 d2fr1a2 d2fr1a1  
d1qsga\_ d1qyda\_ d4zjua\_ d2a4ka1 d1yb1a\_ d1wvga1 d1yxma1 d3f4ba\_  
d1mg5a\_ d1xg5a1 d1r55a1 d3gboa\_ d1atla\_ d1kufa\_ d1buda\_ d4q1la\_  
d1ypl\_a\_ d1wnia\_ d1ex0a4 d2f4ma1 d1x3za\_ d3i2ka1 d1mpxa2 d1t3ca\_

d1epwa3 d2a97a\_ d3fiea\_ gle1h.1 d3ioqa\_ d1fh0a\_ d1o0ea\_ d1khqa\_  
d1m6da\_ d2cb5a\_ d1cs8a\_ g8pch.1 d1s4va\_ d2pnsa\_ d1vsna1 d1iwda\_  
d2oula\_ d7pcka\_ d3bwka\_ d3bcna\_ d2p86a\_ d1pvja\_ d1pcia\_ d1gece\_  
d1deua\_ d4bs6a\_ d1xkga1 d1cqda\_ d1jqpa2 d2c0ya\_ d2bdza\_ d3p5ua\_  
d2o36a\_ d1k9xa\_ d1zoya1 d1qo8a2 d1d4ca2 d1chua2 d1jnra2 d2jk6a2  
d2jk6a1 d1feca1 d1feca2 d1lpfa1 d1lpfa2 d1xhca1 d1xhca2 d1dxla2  
d1dxla1 d1gera2 d1m6ia2 d1onfa1 d1onfa2 d3lada2 d3lada1 d1w4xa1  
d1w4xa2 d1gesa2 d1mo9a1 d1xdia1 d1fl2a2 d1fl2a1 d1fcda1 d1fcda2  
d1h6va2 d1h6va1 d1mo9a2 d1gv4a2 d1gv4a1 d2gv8a2 d2gv8a1 d1aoga1  
d1aoga2 d1hyua1 d1ebda1 d1ebda2 d3dk9a1 d1q1ra2 d1q1ra1 d1gesa1  
d1zbfal d2z1ha\_ d2etja1 d3qioa1 d1j11a\_ d2e41a\_ d1j12a\_ d21sna1  
d1io2a\_ d1uaxa\_ d2yv0x\_ d1mu2a1 d1ekea\_ d1i39a\_ d1o94a2 d1lqta1  
d1cjca1 d1reoa1 d1ju2a1 d2f5va1 d3c96a1 d2gmha1 d1pj5a2 d1gpea1  
d1o5wa1 d1n4wa1 d1k0ia1 d2dw4a2 d2ivda1 d1seza1 d2voua1 d1kdga1  
d1s5ja1 d2hbja2 d2igia\_ d1wlja\_ d1qhta1 d4dlea1 d1tgoa1 d2f96a1  
d3tr8a1 d3mxma\_ d1q8ia1 d1y97a1 d1w0ha\_ d1kfsa1 d2py5a1 d1noya\_  
d1d5aa1 d1yt3a3 d2guia\_ d3mwpal d4kbl1a\_ d1iv0a\_ d1b9ra\_ d1offa\_  
d1frra\_ d3wcqa\_ d1e9ma\_ d1l15pa\_ d1lwria\_ d1i7ha\_ d3av8a\_ d1czpa\_  
d1rfka\_ d3p1ma1 d3b2ga\_ d2bt6a2 d1wgqa1 d1v89a1 d2coda1 d1zc3b\_  
d1wg7a1 d1u5ea1 d1v61a1 d2coca1 d2ys1a1 d1v5pa1 d1ntya2 d1wjma1  
d1wila1 d1u29a\_ d1xx0a1 d1unqa\_ d2zkmx3 d1fhoa\_ d1v88a1 d2adza1  
d1x1fa1 d1p6sa\_ d2coaa1 d1btka\_ d1v5ma1 d1faoa\_ d2x18a\_ d1dyna\_  
d1x1ga1 d4kaxb\_ d2j59m1 d1ki1b2 d1xcga2 d1txda2 d1u5da1 d1dbha2  
d1wlha\_ d1upqa\_ d1v5ua1 d1foea2 d2fjla1 d1eaza\_ d2dfka2 d2cofa1  
d1kz7a2 d1jmx2 d1jmx1 d1pbya1 d1r7ha\_ d1faaa\_ d1wika1 d1xfla\_  
d1ttza1 d2f51a1 d1ti3a\_ d1nhoa\_ d1sena\_ d2i4aa\_ d1ep7a\_ d1zmaa1  
d1fo5a\_ d3lefa1 d3diea1 d2yana1 d1z6na1 d1oaza\_ d3zywa1 d4aj8a\_  
d1nm3a1 d4fiwa\_ d1wmja\_ d4hs1a1 d1liloa\_ d1xwaa1 d1wjka1 d2vm1a\_  
d1fb6a\_ d1gh2a\_ d1h75a\_ d1nw2a\_ d1kx5b\_ d3a6na\_ d4m6ba2 d2nqbd\_  
d3wkjd\_ d2yfwe\_ d4h9na\_ d5bnxa\_ d1kx5c\_ d3r45a\_ d1eqzb\_ d4jjnb\_  
d1f66c\_ d1eqza\_ d4wnnb\_ d1kx5a\_ d1u35c1 d1id3a\_ d2nqbc\_ d1kx5d\_  
d3us3a3 d3us3a1 d2b5ea2 d2b5ea3 d2b5ea1 d2b5ea4 d2kp1a1 d2kp2a1  
d1hyua3 d1j08a1 d1j08a2 d1pd212 d1nhya2 d2a2ra2 d1k0dd2 d1f2ea2  
d1gsua2 d1f3ba2 d2fhea2 d2pvqa1 d1tw9a2 d1oyja2 d1e6ba2 d1k0ma2  
d3ik7a1 d4is0a1 d1r5aa2 d1jlva2 d1m0ua2 d3gtub2 d1z9ha2 d1okta2  
d1axda2 d2gsra2 d1tu7a2 d1k3ya2 d1zgma1 d1gnwa2 d1gwca2 d2gsta2  
d1glqa2 d1oe8a2 d1pn9a2 d1v2aa2 d1fw1a2 d1duga2 d3vrda1 d3vrda2  
d1fcdc2 d1fcdc1 d1h1oa2 d1m70a2 d1m70a1 d1ig8a1 d1czan2 d1czan3  
d1czan1 d1ig8a2 d1czan4 d1bg3a4 d1bg3a2 d1bg3a1 d1sefa\_ d1sfna\_  
d1rc6a\_ d1qqya\_ d1gd6a\_ d1livma\_ d2gv0a\_ d1iiza\_ d2z2fa\_ d1j8xa\_  
d1ghla\_ d1b9oa\_ d1741a\_ d1691a\_ d2o4wa\_ d1p37a\_ d1k28a3 d1xjta1  
d1jtma\_ d2f2qa\_ d4e97a1 d1a3qa1 d1iknc\_ d3brda1 d1p7hl1 d1oy3c\_  
d1imhc1 d1gjia1 d1zk9a1 d2cxka1 d2pjsa1 d2i7ra1 d1ecea\_ d1xqaa1  
d5cj3a1 d1npba\_ d1jifa\_ d2p7oa\_ d1r9ca\_ d1nkia\_ d1mpya2 d1kw3b2

d1kw3b1 d4ghga1 d1tfza1 d3isqa1 d3isqa2 d1sqia1 d1sqia2 d1lkda2  
d1lkda1 d1mpya1 d1cjxa1 d1sp9b2 d1t47a1 d1t47a2 d1flua2 d1sp8a1  
d1sp8a2 d1flua1 d1ro5a1 d1s5ja2 d4dlea2 d1tgoa2 d3py8a2 d1q8ia2  
d1kfsa2 d2py5a2 d1d5aa2 d1qsta\_ d2beia1 d4m3sa\_ d1u6ma1 d1yk3a1  
d3dr6a\_ d1xmta\_ d1z4ea1 d2ge3a1 d1bo4a\_ d2fiaa1 d2jdca1 d1y9wa1  
d3to7a\_ d1wwza1 d2fl4a1 d2ozua1 d2b5ga\_ d2cy2a1 d2p0wa\_ d1cm0a\_  
d4pswa\_ d1yrea1 d1yr0a1 d1m4ia\_ d2gana1 d1yvka1 d1ghea\_ d2g3aa1  
d1y7ra1 d2euia1 d1q2ya\_ d2fsra1 d1xeba\_ d2ae6a1 d1cjwa\_ d1qsma\_  
d2aj6a1 d1y9ka1 d1i12a\_ d1vkca\_ d2atra1 d1n71a\_ d2d4pa1 d2fiwa1  
d2fe7a1 d1tiqa1 d2ou2a\_ d1yx0a1 d2fcka1 d1p0ha\_ d2j8ma\_ d2pq8a\_  
d1z4ra1 d1s3za1 d1ufha\_ d1dosa\_ d1gvfa\_ d3qm3a1 d2fjka\_ d1xvqa1  
d1pn0a2 d3hy2a\_ d2cvba1 d1o8xa\_ d1lu4a\_ d1we0a1 d2bmx1 d2a4va1  
d1psqa\_ d1xiya1 d1q98a\_ d1n8ja\_ d1zofa1 d2ggta\_ d3tjja\_ d4jela1  
d1o73a\_ d3s9fa\_ d2zcta\_ d1qmva\_ d1jfua\_ d2b1ka\_ d5dvba1 d2b5xa1  
d2v2ga\_ d1st9a\_ d3tb2a\_ d4l1ra\_ d4fh8a1 d1e2ya\_ d1knga\_ d2h30a\_  
d1i5ga\_ d2z9sa\_ d2f8aa1 d1tp9a1 d2b7ka\_ d1nm3a2 d3hvv1 d2wfc1  
d4kcea\_ d1xvwa1 d4gqca1 d3qpma\_ d4k1fa\_ d1zzoa1 d1gp1a\_ d2qked\_  
d4ksoa\_ d1t4za1 d1wwja\_ d4mh8a\_ d1mu2a2 d4i7ga1 d1etha2 d1w52x1  
d2ppla1 d1hpla2 d1lpbb2 d2oxea1 d1bu8a2 d1rpla2 d1ys1x\_ d4hs9a\_  
d1ispa\_ d1ex9a\_ d3qmma\_ d1ra6a\_ d1muka\_ d3gsza\_ d1khva\_ d1te9a\_  
d2xwha\_ d3uqsa\_ d3hkwa\_ d3n6ma\_ d2cjqa\_ d2xyma\_ d1teba\_ d1te8a\_  
d1u09a1 d4wfxa\_ d3tyqa\_ d2pgga1 d1svpa\_ d1mbma\_ d3su6a1 d1cula1  
d4agka\_ d1vcpa\_ d1q31a\_ g1n11.1 d3e90b\_ d3u1jb\_ d1xwcd1 d3kj4a\_  
d1w8aa\_ d2ifga3 d1p9ag\_ d1xkua\_ d1g12a\_ d3p0ya1 d1lgra1 d1lgra2  
d1n8yc2 d1n8yc1 d1m6ba2 d1m6ba1 d1dzka\_ d4tlja\_ d2a2ua\_ d4wfva\_  
d3t1da\_ d4iaxa\_ d3zq3a\_ d2nnda\_ d1i4ua\_ d1kxoa\_ d1bbpa\_ d1kt7a\_  
d1lexsa\_ d3s26a1 d1l1f7a\_ d1qfta\_ d4gh7a\_ d1z24a1 d1qabe\_ d1xkia\_  
d1ew3a\_ d3bx7a\_ d4iawa1 d1n0sa\_ d1gkab\_ d3kzaa\_ d2k23a\_ d2l9ca1  
d2joza1 d1gm6a\_ d3kffa\_ d3saoa1 d1e5pa\_ d1yupa1 d1iua\_ d1jgta2  
d1ea0a3 d1ecfa2 d1q15a2 d1ct9a2 d1ao0a2 d1te5a\_ d1ohfc\_ d2tbvc\_  
d1c8nc\_ d1x36a\_ d1smvc\_ d1ng0c\_ d4sbvc\_ d1lopa\_ d1f2nc\_ d1cixa\_  
d1y29a\_ d1v7fa\_ d2jtba\_ d1d1ha\_ d1g9pa\_ d1lupa\_ d1qk7a\_ d1mb6a\_  
d2a2va\_ d1niya\_ d1i25a\_ d1hvwa\_ d2mpqa\_ d1ie6a\_ d1la4a\_ d2mxoa1  
d1d10a\_ d1koza\_ d1qk6a\_ d1emxa\_ d1lqra\_ d1c6wa\_ d1rmka\_ d1ixta\_  
d1eyoa\_ d1cnna\_ d1g1pa\_ d1f3ka\_ d1fyga\_ d1rypd\_ d1irua\_ d1rypc\_  
d3unfk\_ d1rypa\_ d1j2pa\_ d1lirui\_ d1j2qh\_ d3unfh\_ d1m4ya\_ d1rypb\_  
d1liru1\_ d1lirug\_ d1liru2\_ d1q5rh\_ d1rypg\_ d1liruf\_ d1q5qa\_ d1e94a\_  
d1lirub\_ d1ryph\_ d3ty6a\_ d1liruj\_ d1liruk\_ d1rype\_ d1lirud\_ d1lirue\_  
d3mi01\_ d1rypf\_ d1liruh\_ d2z3ba\_ d1liruc\_ d3mka2\_ d1liru1\_ d1e88a1  
d1l6ja5 d1l6ja4 d1eaka4 d1eaka3 d1l6ja3 d1h8pa1 d1ny721 d1ny722  
d1a6ca3 d1a6ca2 d1a6ca1 d1pgl22 d1pgl21 d1pgl11 d1ny711 d1mqta\_  
d1d4m3\_ d1fmd3\_ d2mev1\_ g1aym.1 d1ev13\_ d4q4w1\_ d1r1a3\_ d2x5ia\_  
d1rhi1\_ g1r1a.1 g1d4m.1 g1rhi.1 d1b35b\_ d1lopa\_ d1tme1\_ d4iv1a\_  
g1pvc.1 g1fpn.1 d1fpn1\_ d4gb31\_ d1d4m1\_ d1fmd1\_ d1ev11\_ d2wzr3\_

g1cov.1 d1qqp3\_ g1fmd.1 d2x5ic\_ d1rhi3\_ gloop.1 d1hxs1\_ g1hxs.1  
d1fnp3\_ d1bev1\_ g2mev.1 d1eah3\_ d1aym1\_ d1pvc3\_ d1qqp1\_ d1zba3\_  
d1h8ta\_ d3vbhc\_ g1b35.1 g1bev.1 d1hxs3\_ g1ev1.1 d1bev3\_ g1tmf.1  
d1tmf1\_ d2mev3\_ g1eah.1 g1h8t.1 d1eah1\_ d4q4w3\_ d1r1a1\_ d1aym3\_  
d1pvc1\_ d1zba1\_ d1h8tc\_ d1oopc\_ d1tme3\_ g1qqp.1 d4iv1c\_ g1tme.1  
d1y14b1 d2nn6i1 d1i941\_ d2zjra2 d1smxa\_ d2qamc2 d1hh2p1 d2r7da1  
d1rl2a2 d1wfaq1 d3bzka4 d1x6oa2 d3a0ja\_ d2j01d2 d2ja9a1 d4q15a\_  
d1hr0w\_ d1luza\_ d2n3sa\_ d2vnud1 d1h95a\_ d1go3e1 d2nn6h1 d1ne3a\_  
d2mola\_ d1liz6a2 d1jjga\_ d1e3pa2 d2ix0a3 d2ix0a2 d2lxja\_ d1ueba3  
d1ueba2 d2z0sa1 d1u0la1 d2ix0a1 d2eifa2 d2je6i1 d3i2za1 d2c35b1  
d2ahob2 d1t9ha1 d3i4oa\_ d2qall1 d1jt8a\_ d2nn6g1 d1g6pa\_ d3cama\_  
d1i94q\_ d1c9oa\_ d1d7qa\_ d2ba0a1 d2vnud2 d2vnud3 d1khia2 d2qalq1  
d1wi5a1 d1xtda2 d1ny4a\_ d3ia2a\_ d1a88a\_ d4dgqa1 d1hkha\_ d1zoia\_  
d2r80b\_ d1cqxa1 d1cg5a\_ d3boma\_ d2h8fb\_ d2raoa\_ d3bj1a\_ d4hrrb\_  
d2r50a\_ d3d1kb\_ d2aa1b1 d3zhwa\_ d3hf4b\_ d3gdja\_ d1jebb\_ d3bj1b\_  
d1x9fb\_ d1wmub\_ d1gcva\_ d3bcqb\_ d3d4xb\_ d1gvha1 d2dc3a\_ d3hf4a\_  
d4yu3a\_ d3k8ba\_ d1qpwb\_ d2r80a\_ d3bcqa\_ d1v4wa\_ d3wtgb\_ d1jl7a\_  
d4esaa\_ d1a9we\_ d3d1ab\_ d1fsla\_ d4h21a\_ d1v4wb\_ d1mwca\_ d1vhba\_  
d1jeba\_ d1spgb\_ d1h97a\_ d1q1fa\_ d1tu9a1 d3d1aa\_ d1hdsb\_ d3hyub\_  
d2zfb\_ d3fs4a\_ d1oj6a\_ d1shrb\_ d4h21b\_ d4yu3b\_ d1spga\_ d3hrwa\_  
d3qqra\_ d3at5a\_ d4wchd\_ d3hyua\_ d1cg5b\_ d1uc3a\_ d1hbra\_ d2raob\_  
d1outb\_ d4esab\_ d3gdjb\_ d3qqqa\_ d1x9fc\_ d3vrfa\_ d1litha\_ d3mkba\_  
d3d4xa\_ d3mjpa\_ d1jl6a\_ d3fh9a\_ d1outa\_ d2dc3b\_ d1it2a\_ d3eoka\_  
d3g46a\_ d1qpwa\_ d3vrfb\_ d1ch4a\_ d1x9fd\_ d1hdsa\_ d2zfa\_ d3mkbb\_  
d1or4a\_ d3wtga\_ d1a4fa\_ d3fh9b\_ d3bomb\_ d3cy5a\_ d3at5b\_ d1x9fa\_  
d2oifa\_ g1gxs.1 g1wht.1 d2xqfa\_ d1ea5a\_ d1f6wa\_ d1dx4a\_ d1qe3a\_  
d1k4ya\_ d4qwwa\_ d2ha2a\_ d1gkub1 d1gkub2 d2qvba\_ d2v9za\_ d4kafa1  
d2m5ta\_ d1wqsa\_ d5bpea\_ d2ipha\_ d1lvoa\_ d2bhga1 d3tnta\_ d3sjia\_  
d3d23a1 d2fyqa\_ d3tloa\_ d3zvea1 d2hrva\_ d3q3ya1 d4asha1 d1jmx3  
d1pbya3 d1pbya4 d4iuaa3 d4bvva\_ d5hpga\_ d3k65a\_ d1ki0a3 d1ki0a2  
d1ki0a1 d1a0ha1 d1pmla\_ d3sp8a3 d2feba1 d1mdwa\_ d1ziva1 d1zcm1  
d1f74a\_ d3l21a\_ d2e1da\_ d1to3a1 d1w3ia\_ d1sfla\_ d1n7ka\_ d1vcva1  
d4imea\_ d1wa3a\_ d2ocza1 d1f2ja\_ d3m16a\_ d2yxga\_ d1ub3a\_ d3a5fa\_  
d1fbaa\_ d1l6wa\_ d1xfba1 d1wx0a1 d1vpxa1 d1ojxa\_ d1mxsa\_ d2a4aa1  
d1xkya1 d3cq0a1 d3s1xa\_ d1f05a\_ d1fdja\_ d3cpra1 d4d2ja\_ d1m8pa3  
d3rp2a\_ g1lucy.1 d1fuja\_ d2zchp\_ d3w94a\_ d1si5h\_ d1lo6a\_ g2pka.1  
d1cgha\_ d1kigh\_ d1a5ia\_ d3s9ba\_ d1hj8a\_ d1ao5a\_ d2anya\_ d1q3xa1  
d1gvza\_ d1azza\_ d4gsoa\_ d2f91a1 d1liaua\_ d1gdna\_ d1eufa\_ g1fiw.1  
d1eq9a\_ d4nfea\_ d2rdla\_ d1spja\_ d1elva1 d1a7sa\_ d1ekbb\_ d1pfxc\_  
d1yc0a\_ d2aiqa\_ g1fiz.1 d1fi8a\_ d4k60a\_ d4dgja\_ d1mzaa\_ d1lop0a\_  
d3tjva\_ d1pytd\_ d1sgfg\_ g1gg6.1 d2eeka\_ g1rtf.1 d1a0ja\_ d3g01a\_  
d1pytc\_ d4e7na\_ d1ddja\_ d1z8ga1 d2hlca\_ d1npma\_ d1brup\_ g1jou.1  
d1sgfa\_ d1autc\_ g2hnt.1 g1kdq.1 d1orfa\_ d3s69a\_ d4crga\_ d1fxya\_  
d1lbqya\_ d2ftba\_ d1pmpa\_ d2rcqa1 d1fdqa\_ d4lkpa\_ d1sa8a\_ d1vyfa\_

d1lpja\_ d3vg7a1 d4azqa1 d1o8va\_ d5bvqa\_ d1p6pa\_ d2qo4a\_ d1opba\_  
d1yiva1 d1o1va\_ d4bvma1 d4tkba\_ d4i3ba\_ d1bwya\_ d1ftpa\_ d4gkca\_  
d1cbia\_ d3p6da1 d1kqwa\_ d2a0aa1 d1m4la\_ d2bk7a\_ d3fjua\_ d1z5ra1  
d1kwma1 d1uwya2 d2c1ca1 d1dtda\_ d1h8la2 d3lgia\_ d3i77a\_ d2z9ia2  
d4nsva\_ d1lcya2 d4jcna\_ d1os8a\_ d1hpga\_ d1p3ca\_ d1l1ja\_ d1qtfa\_  
d1e69a\_ d1mv5a\_ d3g60a4 g1ii8.1 d1ewqa2 d1ji0a\_ d1qhla\_ d1v43a3  
d2wmfa1 d1vpla\_ d1g2912 d4a82a2 g1f2t.1 d2d62a1 d3tuic1 d2bbsa1  
d3g60a3 d2ixea\_ d1g6ha\_ d1sgwa1 d2qi9c\_ d3rlfa1 d3b60a1 d3d31a2  
d2pzea1 g1xew.1 d1jj7a\_ d1oxxk2 d2onka1 d1w1wa\_ d1iwea\_ d1qf5a\_  
d1vmaa2 d1nija1 d1np6a\_ d2p67a1 d3ihla\_ d1okkd2 d1ls1a2 d1slma2  
d1iona\_ d2v40a\_ d1dj3a\_ d3hida\_ d2vo1a1 d2g0ta1 d1vcoa2 d1j8mf2  
d1g3qa\_ d1xjca\_ d1p9ba\_ d1qzxa3 d1ihua2 d1ihua1 d2qm8a\_ d1dj2a\_  
d4ioja\_ d1cp2a\_ d1yrba2 d3gqba2 d1skye3 d1xp8a1 d1tf7a2 d1tf7a1  
d1ye8a1 d1skyb3 d2qe7d2 d4blta\_ d4huta\_ d3l1daa2 d4hyya\_ d2i3ba1  
d1cr1a\_ d3j9tb2 d3ntua2 d1vdza1 d2z43a\_ d1e9ra\_ d1nlfa\_ d3ziaa2  
d1n0wa\_ d1g6oa\_ d3ziad2 d3j9ta2 d1pzna2 d3gqbb2 d2i49a\_ d1nnfa\_  
d1xvxa\_ d1ursa\_ d1h3da1 d1iuda\_ d4m1va1 d1twya\_ d3e13x\_ d2nxoa1  
d4pfua\_ d3ttma\_ d1elja\_ d2qmw1 d1us5a\_ d1y3na1 d1jeta\_ d1uqwa\_  
d4f19a1 d2esna2 d3thia\_ d3fasa1 d2uyeb\_ d2xwva1 d1r9la\_ d2fyia1  
d1pb7a\_ d2ozza1 d1sw5a\_ d1nh8a1 d1vr5a1 d2g29a\_ d1xs5a\_ d3lswa\_  
d2z23a\_ d3w9va\_ d3tcha\_ d1q35a\_ d1z7me1 d3q27a\_ d1p99a\_ d1ve4a1  
d2i6ea1 d4mcoa1 d4n8ya\_ d1eu8a\_ d1zbma1 d1hsla\_ d1ixca2 d1j1na\_  
d1xvya\_ d1y9ua\_ d2z22a1 d1xoca1 d4oera\_ d1wdna\_ d5f1qa1 d1xt8a1  
d4gwoa\_ d4igta1 d1pc3a\_ d4mmpa1 d1o63a\_ d2cz1a1 d2onsa2 d4mija1  
d4ok5a1 d2bmfa1 d2bmfa2 d1yksa1 d1yksa2 d2qeqa1 d2j1qa1 d1a1va2  
d1eh3a\_ d3skpa\_ d1dtza1 d1dtza2 d1ieja\_ d1jnfa2 d1ce2a1 d1jnf1a1  
d1b1xa2 d1b1xa1 d1jw1a1 d1jw1a2 d1ryoa\_ d1h76a1 d1h76a2 d1c4oa1  
d2p6ra3 d2p6ra4 d1oywa2 d1oywa3 d1wrba1 d1w36b2 d1w36b1 d1c4oa2  
d3bora\_ d1t6na\_ d2eyqa5 d2eyqa3 d2eyqa2 d2zu6a2 d1veca\_ d1uaaa1  
d1w36d1 d2g9na1 d1z3ix2 d2rb4a\_ d1hv8a1 d1hv8a2 d1t5ia\_ d1w36c2  
d2j0sa2 d2j0sa1 d1fuka\_ d3hjha1 d1z5za1 d1qdea\_ d1z63a1 d1s2ma2  
d1s2ma1 d1wp9a1 d1wp9a2 d1gm5a3 d1gm5a4 d3dina4 d3dina3 d1q0ua\_  
d1w36c1 d1z3ix1 d1nkta3 d1nkta4 d1uaaa2 d1w36d2 g1qhh.1 d2fwra2  
d2fwra1 d3q3ma\_ d1za0a1 d1mxra\_ d2inca\_ d1jk0a\_ d2incb\_ d1mhyb\_  
d3hf1b\_ d1r2fa\_ d2uw1a\_ d1mhyd\_ d3n37a\_ d1afra\_ d1oquc\_ d1syya\_  
d1mtyd\_ d2o1za\_ d1uzra\_ d1smsa\_ d2fkza\_ d1zuj1 d1s3qa1 d2fjca1  
d1z6om1 d1veia\_ d4dyya\_ d1jiga\_ d3gvya\_ d2pyba\_ d4cy9a1 d3bvfa1  
d1r03a\_ d2cf7a\_ d1nf4a\_ d1zs3a1 d4iwka\_ d3ka8a\_ d3np0x\_ d1n1qa\_  
d1lb3a\_ d4e6ka\_ d1z6oa1 d2fzfa1 d4dyua\_ d3ge4a\_ d1jgca\_ d4am4a\_  
d2z6ma\_ d1ji5a\_ d1vlga\_ d1lkoa1 d1krqa\_ d3qz3a\_ d1o9ra\_ d2ffxj\_  
d1yv1a1 d2v2pa\_ d1j30a\_ d4di0a\_ d1dpsa\_ d1oewa\_ d2qzxa\_ d2asia\_  
d1psoe\_ d1miqa\_ d1smra\_ d2h6ta\_ d1pfza\_ d1izda\_ d3hd8a\_ d1j71a\_  
d1dpja\_ d4aa9a\_ d1t6ex\_ g1b5f.1 g1lya.1 d1qdma2 d1bxoa\_ d1wkra\_  
d1tzsa\_ d1libqa\_ d2qzwa\_ d2v76a\_ d1wj1a1 d1aqca\_ d1qqga2 d1qqga1

d1ntva\_ d1n3ha\_ d4dbba\_ d3f0wa1 d1p3ra\_ d1wgua1 d2cy4a1 d3hqca\_  
d1wvha1 d1xr0b1 d1bdqa\_ d3ggta\_ d3ixoa\_ d1mrxa\_ d2haha\_ d1tw7a\_  
d4nj5a\_ d1sgua\_ d2p3da\_ d1nsoa\_ d3d3ta\_ d2rkfa\_ d1c6ya\_ d2rspa\_  
d3ogpa\_ d3ekwa\_ d2o4na\_ d2j9ja\_ d1baia\_ d3ggua\_ d3l3za\_ d4npua\_  
d4j55a\_ d2r8na\_ d2fxda\_ d2p3ca\_ d4dqa\_ d3ttpa\_ d3t3ca\_ d2p3aa\_  
d2hc0a\_ d2fdda\_ d3mwsa\_ d1um8a\_ d1lixza\_ d1qvra2 d1qvra3 d1qzma\_  
d1sxjc2 d1jr3d2 d2p65a\_ d1l8qa2 d3hu3a3 d1sxjd2 d1njfa\_ d1in4a2  
d1sxja2 d1tuea1 d2ce7a2 d1w5sa2 d1sxjb2 d1d2na\_ d1ny5a2 d1ofha\_  
d2gnoa2 d2a5yb3 d1fnna2 d1u0ja1 d1lv7a\_ d1iqpa2 d2fnaa2 d1ixsb2  
d4gita\_ d1sxje2 d1g41a\_ d1k8rb\_ d1wgra1 d1ef5a\_ d1wfy1 d1e8ya3  
d1wgya1 d1lfda\_ d2cs4a1 d1wxma1 d2bye1 d3kh0a1 d2byfa1 d1wxaa1  
d1e7ua3 d4yl8a1 d2a16a3 d1wgda1 d1wga1 d4q5eb\_ d1wjna1 d1se9a\_  
d3n3kb\_ d1wz0a1 d1we6a1 d2m0xa\_ d2gbka\_ d3rt3b1 d1wh3a1 d1sifa\_  
d2ekek2 d4ii2b1 d4hk2a1 d1c3ta\_ d1m94a\_ d1wgha1 d1ttna1 d1j8ca\_  
d1wx8a1 d3v6cb1 d2ma9b\_ d4i6lb1 d1bt0a\_ d2jvca1 d1iyfa\_ d2k1fa\_  
d1wxva1 d1wf9a1 d1t0ya\_ d2io0b2 d1x1ma1 d2gbma\_ d1zw7a1 d2m17a\_  
d1ud7a\_ d1we7a1 d2lwpa\_ d2gbja\_ d1wjua1 d1v6ea1 d1v86a1 d4eewa\_  
d1wiaa1 d4icva\_ d4gu2a\_ d1wx7a1 d1wy8a1 d4hjka1 d2faza1 d1v5oa1  
d2a13a1 d2cr5a1 d1wj4a1 d1s3sg\_ d3ubra\_ d1qo8a1 d1d4ca1 d2k3va\_  
d1ft5a\_ d1qdba\_ d1m1qa\_ d2j7aa\_ d1h21a\_ d1ogyb\_ d4fasa\_ d1jnia\_  
d1oaha\_ d1sp3a\_ d1g66a\_ d5ajha1 d3h33a\_ d1rwja\_ d19hca\_ d1os6a\_  
d3bxua\_ d3h4na\_ d3caoa\_ d1j0pa\_ d2ctha\_ d1duwa\_ d1ofwa\_ d2e84a\_  
d1hh5a\_ d1gyoa\_ d3h34a\_ d1wioa4 d1ccza2 d1vcaa1 d1dr9a2 d1ic1a1  
d2d9qb1 d2nxyb2 d1adqa1 d1fnga1 d1uvqb1 d1zs8a1 d2vola1 d2vola2  
d1mfb12 d2jelh2 d1uwel2 d3qq4b1 d1kjbv\_ d1k5na1 d1osph2 d4odh12  
d1ow0a1 d1ow0a2 d1bfob2 d3l9ra2 d3jtth1 d2fath2 d4elkb2 d1fn4b2  
d2xfxb\_ d1pg7x2 d1cqka\_ d4k71b2 d1lk2a1 d1eapb2 d4lfhg2 d1i4fa1  
d2nw2a2 d1kfah2 d1mhca1 d1h3ua1 d1wejh2 d1h0db2 d1a5fh2 d1kcvh2  
d1mjuh2 d1qqda1 d1kcrh2 d1k8ia1 d3huja2 d2nnab1 d1nfd2 d3mffb2  
d1s9va1 d1lk3h2 d1q0xl2 d1fv1b1 d1neza1 d4rfeb2 d1r3ha1 d1a6tb2  
d1kjva1 d1pz5b2 d1onqa1 d2bc4a2 d1de4a1 d1k8da1 d1tcra2 d1dn0b2  
d1nfde2 d2xwtb2 d1bfoa2 d1mexh2 d1iakb1 d1ypzf2 d4f7ea2 d1q72l2  
d2fbjh2 d1fe8h2 d1clzh2 d1fngb1 d1uvqa1 d1vgka1 d1c16a1 d4j12a2  
d4x99b2 d1igtb3 d1je6a1 d1q72h2 d1nldh2 d1teth2 d2hmic2 d1ilca2  
d1ilca1 d1k8ib1 d1q0yh2 d1kfa12 d3frua1 d1pg7w2 d1u58a1 d1igyb4  
d1igyb3 d1hyrc1 d1klub1 d1deeb2 d1c12b2 d2bc4b2 d2ig2h2 d1kcvl2  
d3wn5b1 d1lk2b\_ d1lk3l2 d1mjul2 d1sm3h2 d1q0xh2 d1zvs1 d1ydp1  
d1u8ib2 d1ypze2 d1kcu2 d2e3fa\_ d1mm0a\_ d2e3ea\_ d2l1da\_ d2ny8x\_  
d2e3ga\_ d2ny9x\_ d2nz3a\_ d2lj7a\_ d1n4na\_ d2m8bb1 d2kyqa\_ d3psma\_  
d1jkza\_ d1jxca\_ d2gl1a\_ d1ugla\_ d4uj0a\_ d2k4ua\_ d1hp2a\_ d2lu9a\_  
d1baha\_ d2meoa1 d1wm7a\_ d1hlya\_ d1n8ma\_ d1jlza\_ d1wpda\_ d1c55a\_  
d1pvza\_ d1wt7a\_ d1rjia\_ d1wz5a\_ d1m2sa\_ d1pjva\_ d1c49a\_ d1qkya\_  
d2ktca1 d1wmta\_ d1j5ja\_ d1rlga\_ d1t0za\_ d2i61a\_ d1t1ta\_ d1sn4a\_  
d1kv0a\_ d2lkba\_ d1npia\_ d1wvna\_ d1pe4a\_ d2kbka\_ d2li7a\_ d1djta\_

d2kbha\_ d1dq7a\_ d1sega\_ d1omya\_ d1zywa1 d1jzaa\_ d1t61c1 d1iyjb4  
d1iyjb5 d1iyjb3 d1o7ia\_ d4ipca1 d1x3ea\_ d4apva\_ d1jb7a1 d1jb7a2  
d1jb7a3 d3kdfa\_ d1ue1b\_ d1wjja1 d3eiva\_ d1xjva2 d1xjva1 d2ccza2  
d1se8a\_ d111oc\_ d1jb7b\_ d1qvca\_ d3ulla\_ d1qzga\_ d1miua4 d1miua5  
d1miua3 d3g48a1 d1gd7a\_ d1mkha\_ d1jjcb3 d1pyba\_ d3ubub\_ d1egia\_  
d1v7pa\_ d1tdqb\_ d3ubua\_ d1c3ab\_ d1h8ua\_ d3bx4b\_ d1t8ca1 d1sb2a1  
d1qdda\_ d2ziba1 d3cada\_ d1byfa\_ d1j34b\_ d1jwia\_ d1jzna\_ d1c3aa\_  
d1oz7b\_ d1wmza\_ d3bdwb\_ d1hq8a\_ d1fifa1 d1dv8a\_ d3hupa\_ d1wk1a1  
d1umra\_ d2afpa\_ d3bx4a\_ d1gz2a\_ d1s16a\_ d1v7pb\_ d3g8ka\_ d1ixxa\_  
d1j34a\_ d1jwib\_ d1g1sa1 d1y17a1 d1ja3a\_ d1fvub\_ d3bdwa\_ d1sb2b1  
d1fvua\_ d1umrc\_ d1oz7a\_ d4m17a\_ d3cfwa1 d1ypqa1 d1g1ta1 d3fd4a\_  
d3l9jc\_ d4dn8a1 d1v41b\_ d1rd11\_ d2msba\_ d1dgsa2 d1ckma1 d1p16a1  
d1x9na2 d3zxha\_ d1cgl\_a\_ d1rm8a\_ d1leaka2 d1hy7a\_ d2jsda\_ d1cxva\_  
d1hv5a\_ d1i76a\_ d1rpma\_ d2shpa1 d1yfoa\_ d118ka\_ d2ooqa1 d1g4us2  
d1lara2 d1lara1 d1wcha\_ d2fh7a2 d2fh7a1 d1ohea1 d1ohea2 d2f4da\_  
d1rxda\_ d2hxpa\_ d1xria\_ d1d5ra2 d1fpza\_ d3ezza\_ d4y2ea\_ d1i9sa\_  
d3azya\_ d3wvja\_ d1upsa1 d1ajoa\_ d2hyka\_ d1ajka\_ d2vy0a\_ d1o4ya\_  
d3o5sa\_ d3d6ea\_ d3atga\_ d1umza\_ d3i4ia\_ d1c11a\_ d41bqa\_ d1a78a\_  
d1slta\_ d4no4a\_ d3zsja\_ d3duia\_ d1g86a\_ d1is3a\_ d1qmja\_ d1hlca\_  
d1tdha3 d1q3ba3 d1ee8a3 g1qmo.1 g1len.1 d3zyra\_ d1fnya\_ d1n47a\_  
g21tn.1 d1avba\_ d3usua\_ d1dhkb\_ d1f9ka\_ d1lukga\_ d1g8wa\_ d1g9fa\_  
d1wbfa\_ d3wcsa\_ d1g7ya\_ d1mvqa\_ d1hq1a\_ d1v6ia\_ d1dbna\_ d1qnwa\_  
d1fx5a\_ d4l8qa\_ d1ioaa\_ d3n35a\_ d1epwa1 d2h0ba\_ d2erfa\_ d1h30a2  
d3mw4a1 d1pz7a\_ d2r1ba\_ d3v64a1 d1d2sa\_ d3bopa1 d3mw3a1 d1okqa1  
d1okqa2 d1dszb\_ d1a6ya\_ d3cbba\_ d1ynwa1 d1r4ia\_ d2hana\_ d2hanb\_  
d2enval d1kb4b\_ d2n11b\_ d1l01a\_ d1cita\_ d2dara2 d2dara1 d1wyha2  
d2dloa2 d1rutx4 d1rutx3 d2cuqa2 d1x41a2 d1x41a1 d1x3ha2 d1x3ha1  
d2d8za1 d1x61a2 d1x6aa1 d1x6aa2 d2cora2 d2cora1 d1v6ga1 d1v6ga2  
d2d8za2 d1x64a1 d1x64a2 d1b8ta1 d2co8a1 d1x63a2 d2dj7a2 d2dj7a1  
d2cu8a2 d2cu8a1 d1g47a2 d1g47a1 d1j2oa1 d1wyha1 d2dloa1 d1wiga1  
d1wiga2 d2cupa2 d2cupa3 d1x68a1 d2d8ya2 d2d8ya1 d1m3va2 d1x62a1  
d1x68a2 d1x61a1 d1b8ta3 d1b8ta2 d2d8xa2 d2d8xa1 d1x4ka1 d1x4ka2  
d2cuqa1 d1m3va1 d2co8a2 d1x63a1 d2cura1 d2cura2 d1x62a2 d1op9a\_  
d1y01a1 d1etzb1 d1egj11 d2gsib1 d1nj9a1 d4jfhd1 d1aqk11 d1t2ja\_  
d1l04h1 d1zvya1 d3v4v11 d4enec1 d1kxtb\_ d5e8ea1 d2pxya\_ d4weud\_  
d1xiwc\_ d2esvd1 d1qnzh\_ d1ogae1 d1f4xh1 d4n1hb\_ d3ezjb1 d3mlw11  
d1kfah1 d1etza1 d1b4jh1 d3cfic\_ d4w68a\_ d2arja1 d1ek3a\_ d2ok011  
d1vera\_ d1uwgh1 d1blnb1 d1fpth1 d1rzga1 d2giya1 d4m3kb1 d1nc2a1  
d2nyyd1 d1ncna\_ d1fbih1 d5dxwa\_ d4fqqa1 d1dqdh1 d1jfq11 d1kelh1  
d1faih1 d1frgl1 d1fig11 d4m6n11 d1fo0a\_ d4hxb11 d3b5ga\_ d3quyd1  
d2h9gb1 d1i8kb\_ d2dd8h1 d2ck0h1 d1eaja\_ d4w6wb1 d2a6ib3 d1t66d1  
d2e27h\_ d1ob1b1 d1f11b1 d2v7na1 d1ad0a1 d2xt1b1 d1pskh1 d4i13b1  
d2op411 d1a0q11 d1uwei1 d1za3a1 d1ncb11 d4uu9a\_ d1bm3h1 d1cloh1  
d1nqba2 d1cf8h1 d4y5va\_ d1mhph1 d5anma1 d4cdgc1 d4ldeb\_ d1y01b1

d2pcpb1 d1z3gl1 d1dfb11 d1fh5h1 d3g5xa1 d1tzib1 d4dn3l1 d3zhka1  
d2b1hh1 d2uy1a1 d1f3dh1 d1nj9b1 d2agjh1 d2h1pl1 d1q72h1 d8fabbl  
d1ndmb1 d1rjca1 d4u6hb1 d3upca\_ d2fbj11 d1osph1 d1tvda\_ d2cjev\_  
d4fhbd1 d1bd2d1 d1rz7h1 d3nn8a\_ d1blna1 d1knoa1 d1nfda1 d2bmkb1  
d1dq11\_ d1igyb1 d1igf11 d12e8h1 d3utza1 d1nc2b1 d1rihh1 d4mwfb1  
d4jvpa1 d1mieh1 d1rhfa1 d1fgn11 d1sbsh1 d1lp9e1 d1dn0a1 d4lqf11  
d1iaih1 d1kgcd1 d1mh5b1 d1gpol1 d2g60h3 d1f8t11 d2jixd1 d4grwh\_  
d1fo0b\_ d1bfob1 d1axsa1 d1u9ka\_ d1nmbh\_ d1h8na1 d1h8na2 d1jguh1  
d4eura1 d3sdy11 d35c8h1 d1w7211 d1mvub\_ d1i9rh1 d1ob1a1 d4wenb\_  
d1yeeh1 d3ietc1 d1f58h1 d1ad0b1 d1mqk1\_ d1nbvh1 d4b50a\_ d3r8bb\_  
d1baf11 d1mamh1 d4rgne1 d2gsgb\_ d35c811 d1bafh1 d1ai1h1 d2pcpa1  
d2fath1 d2x1pa\_ d1orsb1 d1ibgl1 d1shma\_ d1a2yb\_ d1u0qa\_ d2coqa\_  
d1hilb1 d1qfwi\_ d1jv5b\_ d1fn4b1 d5e0qa\_ d1nsnh1 d1plgl1 d4ocxl1  
d1kb5h1 d1rzfh1 d1pg7x1 d2fx7h1 d2oi9c\_ d1l7i11 d3eyva1 d1d5i11  
d4ffyl\_ d1tet11 d1a6wh\_ d1ac6a\_ d3dvfa\_ d1nfde1 d1mimh1 d1ri8a1  
d1jhlh\_ d3dura\_ d1fskb1 d1f97a1 d3so3b1 d2ak4d1 d1lp9f1 d4z7wf1  
d1l7th1 d4y5ya\_ d4x7ec1 d1emth1 d1ikf11 d1nlbh1 d4utal1 d1bjma1  
d1eapb1 d1u6ah1 d2dtgd1 d1kj2b\_ d1xeda1 d1cleh1 d1fgvh\_ d2bnub1  
d2fb4h1 d2dtgb1 d1ktrh\_ d1jpth1 d1qkz11 d4hepg\_ d2atpb1 d1flrh1  
d2hrp11 d1mvfa\_ d1iaim1 d3k80a1 d2jb5h1 d3zkxc\_ d4grwe\_ d1it9h1  
d1rhhb1 d3w9ec\_ d1e4wh1 d1sy6h1 d2j6eh1 d3qxta\_ d1jglh1 d1p7ka1  
d1tzhb1 d4n8pa1 d1gaf11 d2jelh1 d1wioa2 d4i0cc1 d1cicb1 d1lmka2  
d1lmka1 d1iqwh1 d1orqb1 d1ejoh1 d1jnlh1 d4zg1a\_ d43c9b\_ d1ggbl1  
d1wejh1 d3q6fa1 d1f3dj1 d3c6la1 d1bqlh1 d3p9wb\_ d1a3r11 d1h0db1  
d2uzil\_ d1eo8l1 d1qfwl\_ d1n7ml1 d1igja1 d1c5ch1 d2a9mh\_ d1rmfh1  
d1fj1b1 d4heme\_ d1ccza1 d1a5fh1 d1logad1 d1dlfh\_ d1qa9b\_ d1vgel1  
d3qskb\_ d1sjxa\_ d4ozfg1 d1sq2n\_ d1qd0a\_ d1kcvh1 d1c5db1 d3qcull  
d8faba1 d3bn9d1 d1mjuh1 d4y8dc\_ d7fabh1 d3dvgb1 d1lo0l1 d1a6tb1  
d1gigh1 d1kcrh1 d2hwz11 d1yjdc1 d3clf11 d4krna\_ d1d17l\_ d1e6ol1  
d1mexh1 d3r0ma\_ d4kkna\_ d1fns11 d1oaqh\_ d1rzia1 d1lucbh1 d1ncw11  
d4b41a\_ d1nfdfl1 d2mpah1 d2d7t11 d4grwf\_ d4b5ea\_ d1lk3h1 d3u79a\_  
d4u3xa\_ d1ghf11 d1bvkb\_ d1mcww1 d1b88a\_ d1jrhh1 d32c2b1 d4wemb\_  
d1dsfh\_ d1op3h1 d1ce111 d1iqda1 d1qoka1 d1qoka2 d1qfuh1 d2crya1  
d1ay1h1 d1oaql\_ d3ab0b\_ d1rurl1 d1t4kb1 d1bz7b1 d1n0xb1 d1for11  
d1lucb11 d4w6yb\_ d43c9a\_ d2aab11 d1tzia1 d4n1ca\_ d1k6qh1 d3g9ab\_  
d4tvsa1 d1igmh\_ d1pz5b1 d3dx9a1 d3wxwh\_ d1nakh1 d1kcul1 d3eaka\_  
d4qlra1 d1cr9l1 d1d9ka\_ d1f4xl1 d1deea1 d2i27n2 d1c12a1 d2orb11  
d1j8hd1 d1mcph1 d1c5da1 d1kenh1 d1bd2e1 d1h5ba\_ d4x7fc1 d3upaa\_  
d1t3fa1 d1indh1 d2dtgc1 d4hc111 d1zv5a1 d4wgvb\_ d1uwgl1 d4f37k1  
d1aqkh1 d1vesa\_ d3zkqd\_ d1fpt11 d1lo4l1 d1knob1 d3rrqa\_ d4orz\_  
d1mlbb1 d4hgkc1 d1dqdl1 d1bogb1 d4ozhe1 d1dr9a1 d1i7za1 d1dn0b1  
d1kell1 d1rzib1 d1ypzf1 d1wtla\_ d1hkfa\_ d1fail1 d1figh1 d2vyre\_  
d1sjva\_ d1ohqa\_ d1bfoa1 d1pkqb1 d1mjul1 d1b4jl1 d1nsnl1 d2arjb1  
d1p4bh\_ d4aj0a\_ d3nn8b\_ d2rcja1 d1f2xk\_ d4v1dd\_ d1adqh1 d2eksa\_



d4k3ga\_ dljfqh1 dluweh1 dlfrgh1 d4gftb\_ dluz8b1 d4nlea\_ dlbm3l1  
d1clol1 d3mcka1 d2vqla1 d1ae6h1 d4aq1b1 dluj3b1 d1nbqa1 dlfh5l1  
d2ck0l1 d2ywza\_ d1q72l1 d4nbxb\_ dlhila1 d4hzlb1 d2j88l1 dlzmya1  
d1cd0a\_ d1a4ka1 d1pskl1 d1a0qh1 d4krmb\_ d1ncbh1 d2fbjh1 dlj8he1  
d1i3ua\_ d1cf8l1 d1fe8h1 d2p1ya1 d1eeqa\_ d2x89a\_ d1ol0a\_ d2r0lh1  
d1ub5a1 d1dfbh1 d3eyvb1 d4jdvb1 d4p2cg\_ d2gsia1 d2agjl1 d1u3ha1  
d2h1ph1 d1rihl1 d1fskc1 d1boga1 d2a77l1 d1ospl1 dlqfoa\_ d3dwta\_  
d2fx7l1 d1rz7l1 d3stba1 d1pkqa1 d1b6da1 d1dzba2 d1dzba1 d1kj2a\_  
d4l1ha\_ d1rzgb1 d1dq1h\_ d12e8l1 d1miel1 dljmaa\_ d1sbsl1 dlfgnh1  
d1f58l1 d1mqkh\_ d1ndgb1 d3qeg11 d1iail1 d2aw2a1 d1tqbc1 d3fo2a1  
d4dkaa\_ d1f8th1 d2g60l1 d2ywya\_ dluj3a1 d1yc7a\_ d3bd3a\_ d4w6xb1  
d1nmb1\_ d1i8ka\_ d1rjlb1 d1ypze1 d1p7kb1 d1kxqe\_ dlgpoh1 d2z4qa1  
d1w72h1 d1i9rl1 d4qgya1 d4xt1c\_ d2qqnh1 d1cica1 d3c08h1 d2cd0a\_  
d2bdnh1 d1hnga1 d1mam11 d1nldh1 d1cr9h1 d4lcih1 d3bkyh1 d3qg7l1  
d1ai1l1 d1kxvc\_ d4iosd\_ d1l7ih1 d2x1qa\_ dlub6b1 d3k74b\_ d1libgh1  
d1teth1 dligya1 d1hxma1 d2x6ma\_ d2e7la\_ d5e03a\_ d1qfwm\_ d2r0kh1  
dligjb1 d1rurh1 d1plgh1 d1mj8h1 d1yuhb1 d3fmg11 d1rzfl1 dlemt11  
dlad9b1 d1igtb1 d1nlbl1 d1d5ih1 d3k7ua\_ d4ffyh\_ d1bwwa\_ d3dvga1  
d1a6ta1 d1fgvl\_ d4qxgl1 d1mim11 d1jh11\_ d2hffb1 d2hh0l1 d1qkzh1  
d1l7t11 d1afvh1 d1iaii1 d2cjuh\_ d1um5h1 d2ghwb2 d2ghwb1 d1kgce1  
d2fgwh1 d1ikfh1 d1dvfd\_ d2i24n1 d2xtjb\_ d1za3b1 d2yc1a\_ d2hh0h1  
d2x1oa\_ d1bvka\_ d1rjla1 d5e7ba1 d1igta1 d1il1b1 d2fb4l1 d1mvua\_  
dljpt11 d32c2a1 d1fvca\_ d1iqdb1 d2hrph1 d2p4ab\_ d4qo1a\_ d1p2cb1  
d1wt5c\_ d1t4ka1 d5c1mb\_ d1it9l1 d1bz7a1 d1b2wh1 d1e4w11 d1jnl11  
d1yedb1 d1za6b1 d3u7aa\_ d1igfh1 d3gnml1 d1orsa1 d1wejl1 d1a2ya\_  
d1hxmb1 d1gafh1 d2j4wh1 d1pz5a1 d1j05a\_ d1a3rh1 d4fq1l1 d1qfwh\_  
d1eo8h1 d1n7mh1 d4s11a\_ d1kegh1 d5da4a\_ d1iqw11 d3whxb1 d1vgeh1  
d1deeb1 d1c12b1 d1t2ql1 d1ad9a1 d3gsnb1 d3b2uc1 d1ggbh1 d1t3fb1  
d1nak11 d4ocmc\_ d1lila1 d2v7hb3 d2esve1 d1mcoh1 d2qr0b1 d2q3aa\_  
d1ct8a1 d1kcr11 d2pxyb\_ d2uzih\_ d5c3ld\_ d3durb\_ d1c5cl1 d2ak4e1  
d1dl7h\_ d1xiwd\_ d1mlba1 d1rmfl1 d1i7zb1 d1dlfl\_ d2xa3a\_ d5bq7b1  
d1dqqb1 d3h42l1 d1egjh1 d1kcvl1 d1fe8l1 d2j6e11 d1f3rb2 d1lk3l1  
d1sm3h1 d1q0xh1 d1ghfh1 d7fab11 d1igch1 d1lo0h1 d4idla\_ d5c2bl\_  
d1jrh11 d1il1a1 d3zhda1 d4kfzc\_ d1b0wa\_ d1e6oh1 d1mex11 d4krpb\_  
d1fnsh1 d1ncwh1 d4hgma\_ d4eigb1 d4rzca\_ d2mpa11 d4y5xa\_ d5en2b1  
d3lrga1 d4ej1c1 d1rhha1 d1j05b\_ d1forh1 d1q9wb1 d2wzpd\_ d2aq2a1  
d1h0da1 d3revb1 d2ij0c1 d1tzha1 d4m7j11 d1k6ql1 d3b9kc1 d1igml\_  
d3qeua1 d1dsfl\_ d1ce1h1 d1kcuh1 d1zvha1 d1zvoa1 d1tqbb1 d1ay1l1  
d2qscl1 d2cgrh1 d1nl0h1 d1ken11 d3eo0a1 d4n9ob1 d1n0xl1 d3k1kc\_  
d1c4qa\_ d1prtcl d2wv6d\_ d1ltrd\_ d4l63b1 d1r4pb\_ d1prtd\_ d1tl0f\_  
d2bosa\_ d1prtb1 d3chbd\_ d2aq2b1 d1ck1a1 d1enfa1 d1i4pa1 d1v1oa1  
d1et9a1 d1esfa1 d2g9hd1 d4ohja1 d1klud1 d1bxta1 d1eu3a1 d1ty0a1  
d1fnua1 d2qaln1 d2cqva1 d1fhga\_ d2k1ma\_ d2dl2a1 d1biha3 d1biha1  
d1biha4 d3qp3a1 d1g1ca\_ d1gxea\_ d1cvsc2 d1cvsc1 d1xmwa2 d1m4ka2

d2otpa2 d1biha2 d1rhfa2 d2fcba2 d2fcba1 d1wwbx\_ dlgsma2 d1lepfa1  
d1lepfa2 d2dava1 d1waaa\_ d1f97a2 d1x44a1 d1vcaa2 d1fnla2 d1fnla1  
d3b5ha2 d3h8na2 d3h8na1 d1jbja1 d1jbja2 d1pd6a\_ d1f2qa2 d1f2qa1  
d3cx2a\_ d1nbqa2 d3b5ha1 d1n26a1 d1xiwb\_ d1xaau\_ d1fltx\_ d2ifga1  
d1olla1 d1olla2 d1cs6a4 d1cs6a3 d1cs6a2 d1cs6a1 d2gw5a2 d1sy6a1  
d1xiwa\_ d1lucta2 d1lucta1 d1ry7b2 d1gl4b\_ d1qz1a3 d1olza1 d2c9aa1  
d1wwca\_

**Family-45 (c.1.8.1)**

**Positive dataset contains 21 protein sequences.**

d1szna2 d5do8a1 d2fhfa5 d4m8ua1 d2gjpa2 d4howa1 d3vm5a1 d2x1ia\_  
d1wzaa2 d2diea1 d5cpsa\_ d1zjaa1 d3gbea1 d1wdpa\_ d3dhpa2 d2bhua3  
d4do4a1 d3qgva1 d2d3na2 d1x1na1 d1tz7a1

**Negative dataset contains 3963 protein sequences.**

d1m32a\_ d1libja\_ d1c7na\_ d1iuga\_ d4q75a\_ d2bkwa1 d1t3ia\_ d1n8pa\_  
d1qz9a\_ d1jff9a\_ d1eg5a\_ d3kgwa\_ d1c11a\_ d2ctza1 d1vjoa\_ d2rfva\_  
d1gc0a\_ d1cs1a\_ d1d2fa\_ d2ch1a1 d1qgna\_ d1pffa\_ d1elua\_ d1c7ga\_  
d2v1pa1 d2ez1a\_ d1u08a\_ d1lc5a\_ d2ay1a\_ d1bw0a\_ d3pd6a\_ d7aata\_  
d2csta\_ d1j32a\_ d1fg7a\_ d4wlha\_ d1o4sa\_ d1v2da\_ d1gdea\_ d1m6sa\_  
d1v72a1 d1svva\_ d1ajsa\_ d1wsta1 d2f8ja2 d1lk9a\_ d1vp4a1 d1xi9a1  
d2gb3a1 d1yaaa\_ d1xkla\_ d2wfla\_ d3i2ka1 d1lnsa3 d2cfba1 d1dfoa\_  
d1bj4a\_ d3k28a\_ d2bwpa\_ d3lg0a\_ d2fnua\_ d3ou5a\_ d1z7da1 d1b9ha\_  
d1iaya\_ d4msoa\_ d1bs0a\_ d1s0aa\_ d1sffa\_ d3tqxa\_ d1mdoa\_ d3qboa\_  
d3pgya\_ d1bjna\_ d2dkja\_ d1ejia\_ d1vefa1 d4wxga\_ d3bs8a\_ d3gbxa1  
d1w23a\_ d1h6ua2 d2tbvc\_ d1c8nc\_ d1x36a\_ d1smvc\_ d1ng0c\_ d4sbvc\_  
d1lopa\_ d3lgia\_ d3i77a\_ d2z9ia2 d4nsva\_ d1lcya2 d4jcna\_ d1agja\_  
d1os8a\_ d1hpga\_ d1p3ca\_ d1l1ja\_ d1qtfa\_ d1ddla\_ d1auyb\_ d1qnia1  
d1libya\_ d1f56a\_ d1bypa\_ d1azca\_ d1ws8a\_ d3u25a\_ d1cuoa\_ d1lid2a\_  
d1rkra\_ d2iaac\_ d4dp1x\_ d1nwpa\_ d2gima\_ d2i7sa\_ d1qhqa\_ d3ehbb1  
d1fftb1 d1gyca3 d1hfua2 d1kbva1 d1kbva2 d1sdda1 d1sdda2 d1gyca1  
d1gyca2 d1mzya1 d2bw4a1 d1aoza1 d1aoza3 d1aoza2 d1kyaa2 d1kyaa3  
d1kyaa1 d1mzya2 d4e9sa1 d1sddb1 d1sddb2 d1hfua1 d1hfua3 d1oe1a2  
d1oe1a1 d1v10a2 d1v10a3 d1v10a1 d1novc\_ d2bbvc\_ d1a3qa1 d1iknc\_  
d3brda1 d1oy3c\_ d1imhc1 d1gjia1 d1zk9a1 d2cxka1 d2bema\_ d1pama1  
d1ea9c1 d1qhoa1 d2fhfa2 d2fhfa1 d1k3ia1 d1j0ha1 d1cxla1 d2bhua1  
d1ledqa1 d1f1sa2 d1ut9a2 d1gvia1 d1txka1 d4alac\_ d1pjwa\_ d1rera1  
d1s6na\_ d3uzqb\_ d2phla2 d2phla1 d1fxza2 d1fxza1 d1lrha\_ d1uija1  
g1dgw.1 d2v09a\_ d1uika2 d1uika1 d1dgwa\_ d2pa7a1 d1wlta1 d1nxma\_  
d2c0za1 d1tafa\_ d1bh9b\_ d1tafb\_ d1q9ca\_ d1h3ob\_ d2byka1 d1n1ja\_  
d4g92b\_ d1bh9a\_ d1jfia\_ d1h3oa\_ d2bykb1 d1n1jb\_ d1au7a2 d1e3oc2  
d2ovga\_ d1sq8a\_ d1rzsa\_ d3kz3a\_ d3orca\_ d3gpdg2 d2q49a2 d1hdgo2  
d2g17a2 d2cvoa2 d2czca1 d3pwka2 d1i32a2 d1zyao2 d2pkqo2 d1b7go2  
d2hjsa2 d1cf2o2 d1vkna2 d1nvmb2 d1ux8a\_ d1dlya\_ d4i0va\_ d2bkma\_  
d1dlwa\_ d2bmma\_ d2msya\_ d2djoa1 d2r5za\_ d1au7a1 d1f43a\_ d2lmda1  
d1akhb\_ d1s7ea1 d3nara\_ d1zq3p1 d2craa1 d1mija\_ d4uuta\_ d3a01a\_

d1x58a1 d3rkqa1 d3cmya1 d2cqxa1 d2da6a1 d1e3oc1 d1fjla\_ d1ig7a\_  
d1x41a1 d1wh7a1 d1gt0c1 d2mw8a\_ d1lfup\_ d1x2ma1 d1b72a\_ d1wi3a1  
d1jgga\_ d1wjha1 d1x2na1 d1mnm\_ d2cuea1 d3k2aa\_ d2hosa\_ d2jwta2  
d1pufa\_ d1octic1 d2hi3a\_ d1b8ia\_ d4j19a\_ d3lnqa\_ d1wh5a1 d1b8ib\_  
d1fexa\_ d2cqra1 d1guua\_ d1ug2a1 d2cqqa1 d2ajea1 d4a69c\_ d1h8ac1  
d2crga1 d2iw5b1 d1xc5a1 d1ofcx1 d2cu7a1 d1wgxa1 d2cjja1 d2ckxa1  
d1gvda\_ d1hcra\_ d1tc3c\_ d1gdta1 d1u78a2 d6paxa1 d6paxa2 d1k78a1  
d2iu5a1 d1zk8a1 d2g7sa1 d2fd5a1 d2np5a1 d1z0xa1 d2id6a1 d2d6ya1  
d2i10a1 d2oi8a1 d3c07a1 d2ns7a1 d2fq4a1 d2yvea1 d1t33a1 d2o7ta1  
d1rcta1 d2np3b1 d2g7ga1 d2gena1 d2fbqa1 d2g71a1 d2gfna1 d2g3ba1  
d2jj7a1 d2hyja1 d1sgma1 d1ui5a1 d2hkua1 d2id3a1 d4jyka1 d3ubub\_  
d1egia\_ d1v7pa\_ d1tdqb\_ d3ubua\_ d1c3ab\_ d1h8ua\_ d3bx4b\_ d1t8ca1  
d1sb2a1 d1qdda\_ d2ziba1 d3cada\_ d1byfa\_ d1j34b\_ d1jwia\_ d1jzna\_  
d1c3aa\_ d1oz7b\_ d1wmza\_ d3bdwb\_ d1hq8a\_ d1fifa1 d1dv8a\_ d3hupa\_  
d1wk1a1 d1umra\_ d2afpa\_ d3bx4a\_ d1gz2a\_ d1sl6a\_ d1v7pb\_ d3g8ka\_  
d1ixxa\_ d1j34a\_ d1jwib\_ d1g1sa1 d1y17a1 d1ja3a\_ d1fvub\_ d3bdwa\_  
d1sb2b1 d1fvua\_ d1umrc\_ d1oz7a\_ d4m17a\_ d3cfwa1 d1ypqa1 d1g1ta1  
d3fd4a\_ d3l9jc\_ d4dn8a1 d1v41b\_ d1rdl1\_ d2msba\_ d3lv8a\_ d1s3ga1  
d1zaka1 d1s4qa\_ d3tvta2 d1uf9a\_ d1khta\_ d1ckea\_ d1osna\_ d1p5zb\_  
d4tmka\_ d3cm0a\_ d1jaga\_ d3h86a\_ d1t0hb\_ d1nn5a\_ d2h92a\_ d3kb2a1  
d2c95a1 d1yj5a2 d1kgda\_ d1ly1a\_ d2ak3a1 d1vyva2 d1deka\_ d2grja1  
d1p3ja1 d1y63a\_ d1e4ya1 d1s96a\_ d3iija1 d1lvga\_ d1nksa\_ d1vyua2  
d4e22a\_ d1qf9a\_ d1jjva\_ d1q3ta\_ d1ki9a\_ d1lw7a2 d1teva\_ d1kjwa2  
d1gsia\_ d2iyva2 d1kaga\_ d1viaa\_ d1e6ca\_ d1x6va3 d1g3ma\_ d1j99a\_  
d1t8ta1 d1lnsta\_ d1zrha\_ d1ls6a\_ d2a3ra\_ d1aqua\_ d2zptx\_ d3ckla\_  
d1texas\_ d1q44a\_ d2gwha\_ d1odfa\_ d1uj2a\_ d4gi7a\_ d2jeoa1 d1z0ja1  
d3umra2 d3gj0a1 d2gaoa1 d1yzga1 d1x3sa1 d1g7sa4 d1puja\_ d1ludxa2  
d1kk1a3 d2o52a\_ d1jwyb\_ d1zcaa2 d1zcba2 d2fv8a1 d2cjwa\_ d3dz8a1  
d1xzpa2 d1vg8a\_ d4qxaa\_ d2ew1a1 d1x1ra1 d2bcgy\_ d3doea1 d3cona\_  
d3rega\_ d3wyga\_ d1upta\_ d2b6ha1 d1zd9a1 d1r5ba3 d1n0ua2 d1r2qa\_  
d2f91a1 d2rhda\_ d3q3jb\_ d3q85a\_ d1efma1 d1r8qa\_ d2gf9a1 d2akab1  
d1ek0a\_ d1z08a1 d2gcoa1 d2dy1a2 d4g01b\_ d2cxa1 d1svia\_ d3q72a\_  
d1ni3a1 d4ac9a4 d2erxa1 d2bmea\_ d1wxqa1 d2gf0a1 d4ldja1 d1zunb3  
d1d5ca\_ d4lv5b\_ d1efca3 d1kmqa\_ d2g6ba1 d3lrpa\_ d1tada2 d2y8ea\_  
d4rd4a1 d1z06a1 d2heia\_ d3a58b\_ d1u01a2 d1d2ea3 d1zj6a1 d2ocba\_  
d3rwoa\_ d1mr3f\_ d2e9sa1 d4u5xa1 d2iwra\_ d2fn4a1 d3bwdd\_ d2nzja1  
d2atva1 d2ksqa\_ d3l43a\_ d1mkya2 d1mkya1 d1wmsa\_ d1jnya3 d2rmka\_  
d1f6ba\_ d1f60a3 d1gota2 d1jala1 d2fh5b1 d1g16a\_ d2wblc\_ d1m7ba\_  
d1wf3a1 d1f5na2 d1t9ha2 d1z6xa1 d1z0aa1 d2fg5a1 d2a5ja1 d2bcjq2  
d1s0ua3 d1ky3a\_ d4y0va\_ d4lhwa\_ d2qmea1 d2atxa1 d1legaa1 d1ryha\_  
d1moza\_ d1nrjb\_ d2erya1 d3bfka\_ d1puia\_ d1fzqa\_ d3j3az1 d3t5ga\_  
d1shza2 d3defa\_ d2f7sa1 d3raba\_ d3tsoa\_ d3aq4a\_ d2a17a1 d3sfva1  
d3bc1a\_ d2ncda\_ d1sdma\_ d3h4sa1 d2heha\_ d2grya\_ g3kin.1 d1kk8a2  
d1br2a2 d1goja\_ d1f9va\_ d2mysa2 d3t0qa\_ d4db1a1 d3gbja\_ d1ry6a\_

d1v8ka\_ d1k8ka2 d1k8ka1 d3uleb1 d3i33a2 d3i33a1 d1bupa1 d1dkgd2  
d1dkgd1 d4ci6a2 d1jcfa1 d4a2ba2 d2fxua1 d1yaga2 d1yaga1 d4cbua2  
d1bupa2 d1ig8a1 d1czan2 d1czan3 d1czan1 d1ig8a2 d1czan4 d1bg3a4  
d1bg3a3 d1bg3a2 d3h3no1 d3h3no2 d3ezwa2 d3h1jd1 d1hroa\_ d4gedb\_  
d3zooa\_ d1mz4a\_ d1gu2a\_ d1f1fa\_ d1dvva\_ d1c6ra\_ d1c75a\_ d1e29a\_  
d1gdva\_ d1cnoa\_ d1h32b\_ d1co6a\_ d2bh4x\_ d2aiua\_ d5cytr\_ d1jdl\_ a\_  
d1i8oa\_ d2zboa\_ d3dmia\_ d1ls9a\_ d1wvec\_ d2yk3a\_ d3ph2b\_ d1dw0a\_  
d5aura\_ d1ql3a\_ d1qn2a\_ d1f1ca\_ d4zzva\_ d2xspa\_ d1leg1a\_ d4v20a\_  
d1ojja\_ d4ipma1 d1gpia\_ d4csia\_ d3pfza\_ d3ovwa\_ d2yoka\_ d2nqya\_  
d1h4ga\_ d1hixa\_ d1oa2a\_ d1olra\_ d3b7ma\_ d4h7ma1 d3wp3a\_ d2vgda\_  
d1igoa\_ d3zsea\_ d2nlra\_ d3wx5a\_ d1oa3a\_ d1pvxa\_ d1m4wa\_ d1f5ja\_  
d1oa4a\_ d1ks5a\_ d4ixla1 d3sita1 d1evsa\_ d1cnt1\_ d1pvhb\_ d1z7ca\_  
d1huwa\_ d1bgea\_ d1rhga\_ d1f6fa\_ d1f45b\_ d1ilrb\_ d1axia\_ d1etea\_  
d3tgxb\_ d2z3qa1 d3qb1a\_ d1hula\_ d1m48a\_ d4nkqb\_ d1eera\_ d1v7mv\_  
d5e4ea\_ d2o27a\_ d3b5ka\_ d2psma1 d4zf7a\_ d3uf5a\_ d4x51a\_ d1d9ca\_  
d4ypgc1 d3oq3a\_ d1lqsl\_ d1n1fa\_ d1aula\_ d1wu3i\_ d3bes1\_ d3ux9a\_  
d4dnxa2 d1m8pa2 d1v47a2 d1jhda2 d1x6va2 d3rbaa\_ d2qtra\_ d1nupa\_  
d3l92a\_ d1f9aa\_ d1qjca\_ d2h29a\_ d1vlha\_ d1od6a\_ d1lw7a1 d1mrza2  
d4ruka\_ d2e17a\_ d1iq0a2 d1irxa2 d1r6ta2 d1ivsa4 d2cyba\_ d1rqga2  
d1j09a2 d2yxna\_ d1f7ua2 d1h3fa1 d1ffya3 d2g36a1 d1jila\_ d1n3la\_  
d1i6la\_ d1pfva2 d1h3na3 d3n9ia\_ d3sz3a1 d3sw2a\_ d1moxc\_ d1edmb\_  
d1aut12 d1aut11 d1nqlb\_ d1dva11 d1szba2 d1kigl\_ d2y5fl\_ d1ijqa2  
d1gk5a\_ d1g1sa2 d1nt0a3 d1xdtr\_ d1lmja2 d1lmja1 d1nzia2 d2wphe\_  
d1klil\_ d1pfx12 d1pfx11 d1p9ja\_ d1g1ta2 d1f7ea\_ d4yzub\_ d1qx2a\_  
d1ig5a\_ d2y5ia\_ d1qlsa\_ d1psra\_ d3n22a\_ d2egda\_ d4ggfc\_ d2wcea\_  
d2luca\_ d4aqia\_ d3nsia\_ d2lp3a\_ d1j55a\_ d1a4pa\_ d1k8ua\_ d1nsha\_  
d1pvaa\_ d3fs7a\_ d1ttxa\_ d1rwya\_ d2kyfa\_ d1rk9a\_ d1a75a\_ d1lexra\_  
d1tizal d1nyaa\_ d1g8ia\_ d1ggwa\_ d1wdcc\_ d3fwba\_ d1ggza\_ d2o5ga\_  
d1ctaa\_ d1m45a\_ d3i5gc\_ d1sl8a\_ d1fpwa\_ d2scpa\_ d2roaa\_ d4aqra\_  
d3pn7b\_ d1br1b\_ d2mysb\_ d1s6ca\_ d1bjfa\_ d2obha\_ d1jfka\_ d1jfoa\_  
d1qv0a\_ d1lkja\_ d2mlfc\_ d2m97a\_ d2d8na\_ d4by5a\_ d1jbaa\_ d4nqga\_  
d1wdcb\_ d2mysc\_ d1j7qa\_ d1s6ia\_ d1uhka2 d1r2ua\_ d1dtla\_ d3kf9a\_  
d3pn7c\_ d1fi6a\_ d1c07a\_ d5d67d\_ d1tuza\_ d1h8ba\_ d1leg3a2 d2zkmx1  
d1snla\_ d1y1xa\_ d1hqva\_ d1dvia\_ d1df0a1 d1qxp2a\_ d4usla\_ d1k94a\_  
d1etob\_ d1umqa\_ d1g2ha\_ d1mixa2 d1e5wa2 d1j19a2 d1isna2 d2a16b2  
d3syxa1 d1mkea1 d2p8va\_ d1xoda1 d1i7aa\_ d1evha\_ d1qc6a\_ d1legxa\_  
d1ix2a\_ d3nvva1 d1krha3 d2h88b1 d1n62a2 d1t3qa2 d1kf6b2 d1zoyb1  
d1ffva2 d1dgja2 d1rm6c2 d1h6ua1 d9ldta1 d2ewda3 d1up7a1 d2dfda1  
d1s6ya1 d1vjta1 d7mdha1 d1hyea1 d1t2da1 d1ojsa3 d1b8pa1 d1ldna1  
d1hyha1 d1civa1 d2a92a1 d1ez4a1 d1i0za1 d1y6ja1 d1gv0a1 d1ur5a1  
d1llda1 d1obba1 d1v8ba1 d1gdha1 d1l7da1 d2dlda1 d1mx3a1 d1ygya1  
d1qp8a1 d1j4aa1 d2naca1 d1txga2 d3f47a1 d1mv8a2 d2pv7a2 d1xc2a3  
d2ahra2 d4xiya1 d2f1ka2 d1pgja2 d1i36a2 d1np3a2 d1lj8a4 d1teaa3  
d1qmga2 d2i76a2 d2g5ca2 d1wdka3 d3cuma3 d1kola2 d1f8fa2 d1qora2

d1jqba2 d1vj0a2 d1cdoa2 d1gu7a2 d1d1ta2 d1xa0a2 d2dm6a2 d1jvba2  
d1rjwa2 d1llua2 d1h2ba2 d1tt7a2 d1piwa2 d1o89a2 d1iz0a2 d1e3ja2  
d1yb5a2 d1uufa2 d1e3ia2 d3gpdg1 d1vc2a1 d2nvwa1 d1u8fo1 d1ydwal  
d1hdgo1 d2g17a1 d1cf2o1 d2czca2 d1r0ka2 d1obfo1 d2cvoa1 d1ebfa1  
d1h6da1 d1i32a1 d1zh8a1 d2q49a1 d1qkia1 d1j5pa4 d3pzra1 d1xeaa1  
d1vkoa1 d1vm6a3 d3qvsa1 d2pkqo1 d1b7go1 d1gr0a1 d1p1ja1 d1lc0a1  
d3pwka1 d2hjsa1 d1zyao1 d1vkna1 d1t1ta1 d1nvmb1 d3sjua\_ d3ojfa1  
d1xu9a1 d2jjya1 d1n7ha\_ d1y1pa1 d1h5qa\_ d1jtva\_ d4fs3a\_ d2bkaa1  
d1gy8a\_ d2c5aa1 d1ulsa\_ d1ooea\_ d2b69a1 d1y5ma1 d1spxa\_ d1ae1a\_  
d1bxka\_ d1ydea1 d1gega\_ d1hdoa\_ d1o5ia\_ d1e6ua\_ d1snya1 d2rhca\_  
d3zv4a\_ d5ceja\_ d2d1ya1 d1fjha\_ d3w8ea\_ d2fmua1 d1x1ta\_ d1rpna\_  
d3ay7a1 d1k2wa\_ d1eq2a\_ d2hrba1 d3ruaa\_ d2ew8a1 d4hwka\_ d1xgka\_  
d2bd0a1 d1yo6a1 d2a35a1 d2ntva\_ d1vl8a\_ d1hdca\_ d4bkua\_ d2ag5a1  
d2q45a\_ d1nffa\_ d4iy1a\_ d1zbqa1 d1kewa\_ d1ek6a\_ d1ja9a\_ d2q46a2  
d1iy8a\_ d1cyda\_ d2ptga\_ d1hxha\_ d1uzma1 d3lyla\_ d4m89a\_ d3wyea\_  
d2b1la1 d1w6ua\_ d1sb8a\_ d2q2va\_ d4nr0a\_ d1e6wa\_ d2gasa\_ d3oiga1  
d2bgka1 d1mxha\_ d1vl0a1 d1rkxa\_ d1r6da\_ d1wmaa1 d1e7wa\_ d2c07a1  
d1xkqa\_ d3tzha\_ d1g0oa\_ d3lz6a\_ d1qyca\_ d1ledoa\_ d1gz6a\_ d1oc2a\_  
d1t2aa\_ d1zema1 d2xoxa\_ d1z45a2 d1geea\_ d1p33a\_ d3lt0a\_ d4e6pa\_  
d2wyua\_ d1db3a\_ d4q9na\_ d1xhla\_ d4o1ma\_ d1fmca\_ d2uvda\_ d2gdza1  
d1uaya\_ d2z1ma\_ d2o23a2 d2fr1a2 d2fr1a1 d1qsga\_ d1qyda\_ d4zjua\_  
d2a4ka1 d1ybl1a\_ d1wvga1 d1yxma1 d3f4ba\_ d1mg5a\_ d1xg5a1 d1r55a1  
d3gboa\_ d1atla\_ d1kufa\_ d1buda\_ d4q1la\_ d1ypl1a\_ d1wnia\_ d2cqva1  
d1fhga\_ d2k1ma\_ d2d12a1 d1biha3 d1biha1 d1biha4 d3qp3a1 d1g1ca\_  
d1gxea\_ d1cvsc2 d1cvsc1 d1xmwa2 d1m4ka2 d2otpa2 d1biha2 d1rhfa2  
d2fcba2 d2fcba1 d1wwbx\_ d1gsma2 d1lepfa1 d1lepfa2 d2dava1 d1waaa\_  
d1f97a2 d1x44a1 d1vcaa2 d1fnla2 d1fnla1 d3b5ha2 d3h8na2 d3h8na1  
d1jbja1 d1jbja2 d1pd6a\_ d1f2qa2 d1f2qa1 d3cx2a\_ d1nbqa2 d3b5ha1  
d1n26a1 d1xiwb\_ d1xaua\_ d1fltx\_ d2ifga1 d1olla1 d1olla2 d1cs6a4  
d1cs6a3 d1cs6a2 d1cs6a1 d2gw5a2 d1sy6a1 d1xiwa\_ d1lucta2 d1lucta1  
d1ry7b2 d1gl4b\_ d1qz1a3 d1olza1 d2c9aa1 d1wwca\_ d3nqyb\_ d4gera\_  
d1bqba\_ d1ex0a4 d2f4ma1 d1x3za\_ d1t3ca\_ d1lepwa3 d2a97a\_ d3fiea\_  
g1e1h.1 d3ioqa\_ d1fh0a\_ d1o0ea\_ d1khqa\_ d1m6da\_ d2cb5a\_ d1cs8a\_  
g8pch.1 d1s4va\_ d2pnsa\_ d1vsna1 d1mira\_ d1iwda\_ d2oula\_ d7pcka\_  
d3bwka\_ d3bcna\_ d2p86a\_ d1pvja\_ d1pcia\_ d1gece\_ d1deua\_ d4bs6a\_  
d1xkga1 d1cqda\_ d1jqpa2 d2c0ya\_ d2bdza\_ d3p5ua\_ d2o36a\_ d1zoya1  
d1qo8a2 d1d4ca2 d1chua2 d1jnra2 d2jk6a2 d2jk6a1 d1fecal d1fecal  
d1lpfa1 d1lpfa2 d1xhca1 d1xhca2 d1dxla2 d1dxla1 d1gera2 d1m6ia2  
d1onfa1 d1onfa2 d3lada2 d3lada1 d1w4xa1 d1w4xa2 d1gesa2 d1mo9a1  
d1xdia1 d1fl2a2 d1fl2a1 d1fcda1 d1fcda2 d1h6va2 d1h6va1 d1mo9a2  
d1gv4a2 d1gv4a1 d2gv8a2 d2gv8a1 d1aoga1 d1aoga2 d1hyua1 d1ebda1  
d1ebda2 d3dk9a1 d1q1ra2 d1q1ra1 d1gesa1 d1w5qa\_ d2c1ha\_ d1ohla\_  
d1l6sa\_ d1zbfal d2z1ha\_ d2etja1 d3qioa1 d1j1la\_ d2e4la\_ d1j12a\_  
d2lsna1 d1lio2a\_ d1uaxa\_ d2yv0x\_ d1mu2a1 d1lekea\_ d1i39a\_ d1pn0a1

d1reoal d1ju2a1 d2f5va1 d3c96a1 d2gmha1 d1pj5a2 d1gpea1 d1o5wa1  
d1n4wa1 d1k0ia1 d2dw4a2 d2ivda1 d1seza1 d2voua1 d1s5ja1 d2hbja2  
d2igia\_ d1wlja\_ d1qhta1 d4dlea1 d1tgoa1 d2f96a1 d3tr8a1 d3mxma\_  
d1q8ia1 d1y97a1 d1w0ha\_ d1kfsa1 d2py5a1 d1noya\_ d1d5aa1 d1yt3a3  
d2guia\_ d3mwpal d4kb1a\_ d2d5ra1 d1b9ra\_ d1offa\_ d1frra\_ d3wcqa\_  
d1e9ma\_ d1wria\_ d1i7ha\_ d3av8a\_ d1czpa\_ d1rfka\_ d3p1ma1 d3b2ga\_  
d2bt6a2 d1v58a1 d1t3ba1 d4ilfa2 d4nppa2 d1wgqa1 d1v89a1 d2coda1  
d1zc3b\_ d1wg7a1 d1u5ea1 d1v61a1 d2coca1 d2ys1a1 d1v5pa1 d1ntya2  
d1wjma1 d1wila1 d1u29a\_ d1xx0a1 d1unqa\_ d2zkmx3 d1fhoa\_ d1v88a1  
d2adza1 d1x1fa1 d1p6sa\_ d2coaa1 d1btkal d1v5ma1 d2x18a\_ d1dyna\_  
d1x1ga1 d4kaxb\_ d2j59m1 d1ki1b2 d1xcga2 d1txda2 d1u5da1 d1dbha2  
d1wlha\_ d1upqa\_ d1v5ua1 d1foea2 d2fjla1 d1eaza\_ d2dfka2 d2cofa1  
d1kz7a2 d1r7ha\_ d1faaa\_ d1wika1 d1xfla\_ d1ttza1 d2f51a1 d1ti3a\_  
d1nhoa\_ d1sena\_ d2i4aa\_ d1ep7a\_ d1zmaa1 d1fo5a\_ d31efa1 d3diea1  
d2yana1 d1z6na1 d1oaza\_ d3zywa1 d4aj8a\_ d1nm3a1 d4fiwa\_ d1wmja\_  
d4hs1a1 d1iloa\_ d1xwaa1 d1wjka1 d2vm1a\_ d1fb6a\_ d1gh2a\_ d1h75a\_  
d1nw2a\_ d1kx5b\_ d3a6na\_ d4m6ba2 d2nqbd\_ d3wkjd\_ d2yfwe\_ d4h9na\_  
d5bnxa\_ d1kx5c\_ d3r45a\_ d1eqzb\_ d4jjnb\_ d1f66c\_ d1eqza\_ d4wnnb\_  
d1kx5a\_ d1u35c1 d1id3a\_ d2nqbc\_ d1kx5d\_ d2b5ea2 d2b5ea3 d2b5ea1  
d2b5ea4 d2kp1a1 d2kp2a1 d1hyua3 d1hyua4 d1j08a2 d1pd212 d1nhya2  
d2a2ra2 d1k0dd2 d1f2ea2 d1gsua2 d1f3ba2 d2fhea2 d2pvqa1 d1tw9a2  
d1oyja2 d1e6ba2 d1k0ma2 d3ik7a1 d4is0a1 d1r5aa2 d1j1va2 d1m0ua2  
d3gtub2 d1z9ha2 d1okta2 d1axda2 d2gsra2 d1tu7a2 d1k3ya2 d1zgm1  
d1b48a2 d1gnwa2 d1gwca2 d2gsta2 d1glqa2 d1oe8a2 d1pn9a2 d1v2aa2  
d1fw1a2 d1duga2 d1nira1 d1npya1 d3t4ea2 d1a4ia1 d1o0sa1 d2hk9a2  
d2egga2 d1b26a1 d1bvua1 d1gq2a1 d1c1da1 d1leha1 d1gtma1 d1euza1  
d3dona2 d1edza1 d1gpja2 d1vi2a1 d1p77a1 d1nyta1 d1b0aa1 d1vl6a1  
d1v91a1 d1qusa\_ d1qqya\_ d1gd6a\_ d1livma\_ d2gv0a\_ d1iiza\_ d2z2fa\_  
d1j8xa\_ d1ghla\_ d1b9oa\_ d1iyka2 d1iyka1 d1rxta1 d1iical d2k4ua\_  
d1hp2a\_ d2lu9a\_ d1baha\_ d2meoa1 d1wm7a\_ d1hlya\_ d1n8ma\_ d1jlza\_  
d1wpda\_ d1c55a\_ d1pvza\_ d1wt7a\_ d1rjia\_ d1wz5a\_ d1m2sa\_ d1pjva\_  
d1c49a\_ d1qkya\_ d2ktca1 d1wmta\_ d1du9a\_ d1j5ja\_ d1r1ga\_ d1mpya2  
d1kw3b2 d1kw3b1 d4ghga1 d1tfza1 d3isqa1 d3isqa2 d1sqia1 d1sqia2  
d1lkda2 d1lkda1 d1mpya1 d1cjxa2 d1cjxa1 d1sp9b2 d1t47a1 d1t47a2  
d1flua2 d1sp8a1 d1sp8a2 d1flua1 d3ia2a\_ d1a88a\_ d4dgqa1 d1hkha\_  
d1zoia\_ d1s5ja2 d1qhta2 d4dlea2 d1tgoa2 d3py8a2 d1q8ia2 d1kfsa2  
d2py5a2 d1d5aa2 d1qsta\_ d2beial d4m3sa\_ d1u6ma1 d1ygha\_ d1yk3a1  
d3dr6a\_ d1xmta\_ d1z4ea1 d2ge3a1 d1bo4a\_ d2fiaa1 d2jdca1 d1y9wa1  
d3to7a\_ d1wwza1 d2fl4a1 d2ozua1 d2b5ga\_ d2cy2a1 d2p0wa\_ d1cm0a\_  
d4pswa\_ d1yrea1 d1yr0a1 d1m4ia\_ d2gana1 d1yvka1 d1ghea\_ d2g3aa1  
d1y7ra1 d2euia1 d1q2ya\_ d2fsra1 d1xeba\_ d2ae6a1 d1cjwa\_ d1qsmal  
d2aj6a1 d1y9ka1 d1i12a\_ d1vkca\_ d2atra1 d1n71a\_ d2d4pa1 d2fiwa1  
d2fe7a1 d1tiqa1 d2ou2a\_ d1yx0a1 d2fcka1 d1p0ha\_ d2j8ma\_ d2pq8a\_  
d1z4ra1 d1s3za1 d1ufha\_ d2hqya1 d2hqya2 d1lrza2 d1lrza3 d1ne9a2

d1xvqa1 d1pn0a2 d3hy2a\_ d2cvba1 d1o8xa\_ d1lu4a\_ d1we0a1 d2bmxal  
d2a4va1 d1psqa\_ d1xiya1 d1q98a\_ d1n8ja\_ d1zofa1 d2ggta\_ d3tjja\_  
d4je1a1 d1o73a\_ d3s9fa\_ d2zcta\_ d1qmv\_a\_ d1jfua\_ d2b1ka\_ d5dvba1  
d2b5xa1 d2v2ga\_ d1st9a\_ d3tb2a\_ d4llra\_ d4fh8a1 d1e2ya\_ d1knga\_  
d2h30a\_ d1i5ga\_ d2z9sa\_ d2f8aa1 d1tp9a1 d2b7ka\_ d3hvva\_ d2wfca1  
d4kcea\_ d1xvwa1 d4gqca1 d3qpma\_ d4k1fa\_ d1zzoa1 d1gp1a\_ d1prxa\_  
d4od7a1 d1z6ma1 d4mcua1 d4dvca1 d1r4wa\_ d3l9sa\_ d3rppa\_ d2qked\_  
d4ksoa\_ d1t4za1 d1wwja\_ d2m5ta\_ d1wqsa\_ d5bpea\_ d2ipha\_ d1lvoa\_  
d2bhga1 d3tnta\_ d3sjia\_ d3d23a1 d2fyqa\_ d3tloa\_ d3zvea1 d2hrva\_  
d3q3ya1 d4asha1 d1cg2a1 d1yloa2 d1y7ea2 d1y0ya3 d1lfwa1 d1vixa1  
d1fnoa4 d1vh0a2 d1ysja1 d1vhea2 d1z2la1 d2fvga2 d1vgya1 d1r3na1  
d2grea2 d1xmba1 d1rtqa\_ d1etha2 d1w52x1 d2pp1a1 d1hpla2 d1lpbb2  
d2oxea1 d1bu8a2 d1rp1a2 d1ra6a\_ d3gsza\_ d1khva\_ d1te9a\_ d2xwha\_  
d3uqsa\_ d3hkwa\_ d3n6ma\_ d2cjqa\_ d2xyma\_ d1teba\_ d1te8a\_ d1s48a\_  
d1u09a1 d4wfxa\_ d3tyqa\_ d2pgga1 d1lgya\_ d4l3wa\_ d1llfa\_ d1gz7a\_  
d1ukca\_ d4wfia\_ d4cg1a1 d3visa\_ d1jlia\_ d2rhwa\_ d1svpa\_ d1mbma\_  
d3su6a1 d1cula1 d4agka\_ d1vcpa\_ d1q31a\_ g1n11.1 d3e90b\_ d1ep5a\_  
d3u1jb\_ d3zxha\_ d1cgla\_ d1rm8a\_ d1eaka2 d1hy7a\_ d2jsda\_ d1cxva\_  
d1hv5a\_ d1i76a\_ d3p0ya1 d1igra1 d1igra2 d1n8yc2 d1n8yc1 d1m6ba1  
d4dv8a2 d1jx4a2 d3gv5b1 d1t94a2 d3bq0a2 d1ohfc\_ d1lmra\_ d1cixa\_  
d1y29a\_ d1v7fa\_ d2jtba\_ d1d1ha\_ d1g9pa\_ d1llupa\_ d1qk7a\_ d1mb6a\_  
d2a2va\_ d1niya\_ d1i25a\_ d1hvwa\_ d2mpqa\_ d1ie6a\_ d1kqha\_ d1la4a\_  
d2mxoa1 d1koza\_ d1qk6a\_ d1emxa\_ d1lqra\_ d1c6wa\_ d1rmka\_ d1ixta\_  
d1eyoa\_ d1fu3a\_ d1g1pa\_ d1f3ka\_ d1fyga\_ d1rypd\_ d1irua\_ d1rypc\_  
d3unfk\_ d1rypa\_ d1j2pa\_ d1irui\_ d1j2qh\_ d3unfh\_ d1m4ya\_ d1rypb\_  
d1irul\_ d1irug\_ d1iru2\_ d1q5rh\_ d1rypg\_ d1g3ka\_ d1iruf\_ d1q5qa\_  
d1e94a\_ d1irub\_ d1ryph\_ d3ty6a\_ d1iruj\_ d1iruk\_ d1rype\_ d1irud\_  
d1irue\_ d3mi01\_ d1rypf\_ d1iruh\_ d2z3ba\_ d1iruc\_ d3mka2\_ d1iru1\_  
d1e88a1 d1l6ja5 d1l6ja4 d1eaka4 d1eaka3 d1l6ja3 d1h8pa2 d1h8pa1  
d1ny721 d1ny722 d1a6ca3 d1a6ca2 d1a6ca1 d1pgl22 d1pgl21 d1pgl11  
d1ny711 d1mqta\_ d1d4m3\_ d1fmd3\_ d2mev1\_ g1aym.1 d1ev13\_ d4q4w1\_  
d1r1a3\_ d2x5ia\_ d1rhi1\_ g1r1a.1 g1d4m.1 g1rhi.1 d1b35b\_ d1lopa\_  
d1tme1\_ d4iv1a\_ g1pvc.1 g1fpn.1 d1fpn1\_ d4gb31\_ d1d4m1\_ d1fmd1\_  
d1ev11\_ d2wzr3\_ d1qqp3\_ g1fmd.1 d2x5ic\_ d1rhi3\_ g1loop.1 d1hxs1\_  
g1hxs.1 d1fpn3\_ d1bev1\_ g2mev.1 d1eah3\_ d1aym1\_ d1pvc3\_ d1qqp1\_  
d1zba3\_ d1h8ta\_ d3vbhc\_ g1b35.1 g1bev.1 d1hxs3\_ g1ev1.1 d1bev3\_  
g1tmf.1 d1tmf1\_ d1b35a\_ d2mev3\_ g1eah.1 g1h8t.1 d1eah1\_ d4q4w3\_  
d1r1a1\_ d1aym3\_ d1pvc1\_ d1zba1\_ d1h8tc\_ d1oopc\_ d1tme3\_ g1qqp.1  
d4iv1c\_ g1tme.1 d1ju8a\_ d1eixa\_ d3exra\_ d2ffca1 d2fdsa1 d3n3ma1  
d2czda\_ d1q6oa\_ d2yyua\_ d1vqta1 d3ldva1 d4lt9a1 d3tc7a1 d3hoja\_  
d1i4na\_ d3vnda\_ d3n18a1 d1geqa\_ d3nava1 d1v5xa\_ d4a2ra1 d3tc6a1  
d1ujpa\_ d4ijba\_ d1xcfa\_ d1vc4a\_ d1rd5a\_ d1qopa\_ d3b5va\_ d2r80b\_  
d1cqxa1 d1cg5a\_ d1gcvb\_ d3boma\_ d2h8fb\_ d2raoa\_ d3bj1a\_ d4hrrb\_  
d2r50a\_ d3d1kb\_ d2aa1b1 d3zhwa\_ d3hf4b\_ d3gdja\_ d1jebb\_ d3bj1b\_

d1x9fb\_ d1wmub\_ d1gcva\_ d3bcqb\_ d3d4xb\_ d2dc3a\_ d3hf4a\_ d4yu3a\_  
d3k8ba\_ d1qpwb\_ d2r80a\_ d3bcqa\_ d1v4wa\_ d3wtgb\_ d1jl7a\_ d4esaa\_  
d1a9we\_ d3d1ab\_ d1fsla\_ d4h21a\_ d1v4wb\_ d1mwca\_ d1vhba\_ d1jeba\_  
d1spgb\_ d1h97a\_ d1q1fa\_ d1tu9a1 d3d1aa\_ d1hdsb\_ d3hyub\_ d2zfb\_ b\_  
d3fs4a\_ d1oj6a\_ d1shrb\_ d4h21b\_ d4yu3b\_ d1spga\_ d3hrwa\_ d3qqra\_  
d3at5a\_ d4wchd\_ d3hyua\_ d1cg5b\_ d1uc3a\_ d1hbra\_ d2raob\_ d1outb\_  
d4esab\_ d3gdjb\_ d3qqqa\_ d1x9fc\_ d3vrfa\_ d1litha\_ d3mkba\_ d3d4xa\_  
d3mjpa\_ d1jl6a\_ d3fh9a\_ d1outa\_ d2dc3b\_ d1it2a\_ d3eoka\_ d3g46a\_  
d1qpwa\_ d3vrfb\_ d1ch4a\_ d1x9fd\_ d1hdsa\_ d2zfa\_ b\_ d3mkbb\_ d1or4a\_  
d3wtga\_ d1a4fa\_ d3fh9b\_ d3bomb\_ d3cy5a\_ d3at5b\_ d1x9fa\_ d2oifa\_  
d4lmbx\_ d1cpcb\_ d3v57a\_ d1kn1a\_ d1cpc\_ a\_ d4f0ta\_ d2vjha\_ d4po5b\_  
d1eyxa\_ d1alla\_ d4f0tb\_ d1b33b\_ d1b8db\_ d4h0mb\_ d1b33a\_ d2vjhb\_  
d4lmb\_ b\_ d2vmlb\_ d1allb\_ d2vjta\_ d3dbja\_ d2vmla\_ d2vjtb\_ d4f0ub\_  
d1f99b\_ d4rmpa1 d1liaa\_ d1eyxb\_ d2uulb\_ d4lmsb\_ d4f0ua\_ d2bv8a\_  
d1f99a\_ d2bv8b\_ d2c71b\_ d3dbjb\_ d4rmpb1 d1b8da\_ d4h0ma\_ d3v57b\_  
d1kn1b\_ d1liab\_ d2uula\_ d2j96a\_ d1cwva5 d1azwa\_ d1mtza\_ d1sfra\_  
d1f0na\_ d4qeka\_ d1gkub1 d1gkub2 d2qvba\_ d2v9za\_ d4kafa1 d4iuaa3  
d4bvva\_ d5hpga\_ d3k65a\_ d1ki0a3 d1ki0a2 d1ki0a1 d1a0ha1 d1pmla\_  
d3sp8a3 d2feba1 d1f74a\_ d3l21a\_ d2e1da\_ d1to3a1 d1w3ia\_ d1sfla\_  
d1n7ka\_ d1vcva1 d4imea\_ d1wa3a\_ d2ocza1 d1f2ja\_ d3m16a\_ d2yxga\_  
d1ub3a\_ d3a5fa\_ d1fb\_ aa\_ d1l6wa\_ d1xfba1 d1wx0a1 d1vpxa1 d1ojxa\_  
d1mxsa\_ d2a4aa1 d1xkya1 d3cq0a1 d3s1xa\_ d1f05a\_ d1fdja\_ d3cpra1  
d4d2ja\_ d4mh8a\_ d1mu2a2 d4i7ga1 d3rp2a\_ glucy.1 d1fuja\_ d2zchp\_  
d3w94a\_ d1si5h\_ d1lo6a\_ g2pka.1 d1cgha\_ d1kigh\_ d1a5ia\_ d3s9ba\_  
d1hj8a\_ d1ao5a\_ d2anya\_ d1q3xa1 d1gvza\_ d1azza\_ d4gsoa\_ d2f91a1  
d1iaua\_ d1gdna\_ d1eufa\_ g1fiw.1 d1eq9a\_ d4nfea\_ d2rdla\_ d1spja\_  
d1elva1 d1a7sa\_ d1ekbb\_ d1pfx\_ c\_ d1yc0a\_ d2aiqa\_ g1fiz.1 d4k60a\_  
d4dgja\_ d1mzaa\_ d1lop0a\_ d3tjva\_ d1pytd\_ d1sgfg\_ glgg6.1 d2eeka\_  
g1rtf.1 d1a0ja\_ d3g01a\_ d1pytc\_ d4e7na\_ d1ddja\_ d1z8ga1 d2hlca\_  
d1npma\_ d1brup\_ g1jou.1 d1sgfa\_ d1autc\_ g2hnt.1 g1kdq.1 d1orfa\_  
d3s69a\_ d4crga\_ d1fxya\_ d1bqya\_ d2ftba\_ d1pmpa\_ d2rcqa1 d1fdqa\_  
d4lkpa\_ d1sa8a\_ d1vyfa\_ d1lpja\_ d3vg7a1 d4azqa1 d1o8va\_ d5bvqa\_  
d1p6pa\_ d2qo4a\_ d1opba\_ d1yiva1 d1o1va\_ d4bvma1 d4tkba\_ d4i3ba\_  
d1bwya\_ d1ftpa\_ d1ggl\_ a\_ d4gkca\_ d1cbia\_ d3p6da1 d1kqwa\_ d2a0aa1  
d1dzka\_ d4tlja\_ d2a2ua\_ d4wfva\_ d3t1da\_ d4i\_ axa\_ d3zq3a\_ d2nnda\_  
d1i4ua\_ d1kxoa\_ d1bbpa\_ d1kt7a\_ d1exsa\_ d3s26a1 d1l1f7a\_ d1qfta\_  
d4gh7a\_ d1z24a1 d1qabe\_ d1xkia\_ d1ew3a\_ d3bx7a\_ d4iawa1 d1n0sa\_  
d1gkab\_ d3kzaa\_ d2k23a\_ d2l9ca1 d2joza1 d1gm6a\_ d3kffa\_ d3saoa1  
d1e5pa\_ d1yupa1 d1iiua\_ d4lu0a\_ d1of8a\_ d3unda1 d3e9aa1 d1vr6a2  
d1n8fa\_ d2qkfa\_ d1d9ea\_ d1o60a\_ d1e69a\_ d1mv5a\_ d3g60a4 gl1i8.1  
d1ewqa2 d1qhla\_ d1v43a3 d2wmfa1 d1vpla\_ d1g2912 d4a82a2 g1f2t.1  
d2d62a1 d3tuic1 d2bbsa1 d3g60a3 d2ixea\_ d1g6ha\_ d1sgwa1 d2qi9c\_  
d3r1fa1 d3b60a1 d3d31a2 d2pzea1 g1xew.1 d1jj7a\_ d1oxxk2 d2onka1  
d1wlwa\_ d1iwea\_ d1qf5a\_ d1vmaa2 d1nija1 d1np6a\_ d2p67a1 d3ihla\_



d1okkd2 d1ls1a2 d1s1ma2 d1liona\_ d2v40a\_ d1dj3a\_ d3hida\_ d2vola1  
d2g0ta1 d1vcoa2 d1j8mf2 d1xjca\_ d1p9ba\_ d1qzxa3 d1ihua2 d1ihua1  
d2qm8a\_ d1dj2a\_ d4ioja\_ d1cp2a\_ d1yrba2 d1hyqa\_ d3gqba2 d1skye3  
d1xp8a1 d1tf7a2 d1tf7a1 d1ye8a1 d1skyb3 d2qe7d2 d4blta\_ d4huta\_  
d3l1daa2 d4hyya\_ d2i3ba1 d1cr1a\_ d3j9tb2 d3ntua2 d1vdza1 d2z43a\_  
d1e9ra\_ d1nlfa\_ d3ziaa2 d1n0wa\_ d1g6oa\_ d3ziad2 d3j9ta2 d3gqbb2  
d2i49a\_ d1nnfa\_ d1xvxa\_ d1ursa\_ d1h3da1 d1iuda\_ d4m1va1 d1twya\_  
d3e13x\_ d2nxoa1 d4pfua\_ d3ttma\_ d1elja\_ d2qmwa1 d1us5a\_ d1y3na1  
d1jeta\_ d1uqwa\_ d4f19a1 d2esna2 d3thia\_ d3fasa1 d2uyeb\_ d2xwva1  
d1r9la\_ d2fyia1 d1pb7a\_ d2ozza1 d1sw5a\_ d1vr5a1 d2g29a\_ d1xs5a\_  
d3lswa\_ d2z23a\_ d3w9va\_ d3tcha\_ d1q35a\_ d1z7me1 d3q27a\_ d1p99a\_  
d1ve4a1 d2i6ea1 d4mcoa1 d4n8ya\_ d1eu8a\_ d1zbma1 d1hsla\_ d1ixca2  
d1j1na\_ d1xvya\_ d1y9ua\_ d2z22a1 d1xoca1 d4oera\_ d1wdna\_ d5f1qa1  
d1xt8a1 d1i6aa\_ d4gwoa\_ d4igta1 d1pc3a\_ d4mmpa1 d1o63a\_ d2cz1a1  
d2onsa2 d4mija1 d1eh3a\_ d3skpa\_ d1dtza1 d1dtza2 d1ieja\_ d1jnfa2  
d1ce2a1 d1jnfa1 d1b1xa2 d1b1xa1 d1jw1a1 d1jw1a2 d1ryoa\_ d1h76a1  
d1h76a2 d1c4oa1 d2p6ra3 d2p6ra4 d1oywa2 d1oywa3 d1wrba1 d1w36b2  
d1w36b1 d1c4oa2 d3bora\_ d1t6na\_ d2eyqa5 d2eyqa3 d2eyqa2 d2zu6a2  
d1veca\_ d1uaaa1 d1w36d1 d2g9na1 d1z3ix2 d2rb4a\_ d1hv8a1 d1hv8a2  
d1t5ia\_ d1w36c2 d2j0sa2 d2j0sa1 d1fuka\_ d3hjha1 d1z5za1 d1qdea\_  
d1z63a1 d1s2ma2 d1s2ma1 d1wp9a1 d1wp9a2 d1gm5a3 d1gm5a4 d3dina4  
d3dina3 d1q0ua\_ d1w36c1 d1z3ix1 d1nkta3 d1nkta4 d1uaaa2 d1w36d2  
g1qhh.1 d2fwra2 d2fwra1 d2v8ta\_ d2fkza\_ d1zuj1a1 d1s3qa1 d2fjca1  
d1z6om1 d1veia\_ d4dyya\_ d1jiga\_ d3gvya\_ d2pyba\_ d4cy9a1 d3bvfa1  
d1r03a\_ d2cf7a\_ d1nf4a\_ d1zs3a1 d4iwka\_ d3ka8a\_ d3np0x\_ d1n1qa\_  
d11b3a\_ d4e6ka\_ d1z6oa1 d2fzfa1 d4dyua\_ d3ge4a\_ d1jgca\_ d4am4a\_  
d2z6ma\_ d1ji5a\_ d1vlga\_ d1lkoa1 d1krqa\_ d3qz3a\_ d1o9ra\_ d2ffxj\_  
d1euma\_ d1yv1a1 d2v2pa\_ d1j30a\_ d4di0a\_ d1dpsa\_ d1oewa\_ d2qzxa\_  
d2asia\_ d1psoe\_ d1miqa\_ d1smra\_ d2h6ta\_ d1izda\_ d3hd8a\_ d1j71a\_  
d1dpja\_ d4aa9a\_ d1t6ex\_ g1b5f.1 g1lya.1 g1htr.1 d1qdma2 d1bxoa\_  
d1wkra\_ d1tzsa\_ d1libqa\_ d2qzwa\_ d1orva2 d1xfda2 d2v76a\_ d1wj1a1  
d1aqca\_ d1qqga2 d1qqga1 d1n3ha\_ d4dbba\_ d3f0wa1 d1p3ra\_ d1wgua1  
d2cy4a1 d3hqca\_ d1wvha1 d1xr0b1 d1bdqa\_ d3ggta\_ d3ixoa\_ d1mrxa\_  
d2haha\_ d1tw7a\_ d4njsa\_ d1sgua\_ d2p3da\_ d1nsoa\_ d3d3ta\_ d2rkfa\_  
d1c6ya\_ d2rspa\_ d3ogpa\_ d3ekwa\_ d2o4na\_ d2j9ja\_ d1baia\_ d3ggua\_  
d3lzua\_ d4npua\_ d4j55a\_ d2r8na\_ d2fxda\_ d2p3ca\_ d4dqa\_ d3ttpa\_  
d3t3ca\_ d2p3aa\_ d2hc0a\_ d2fdda\_ d3mwsa\_ d1um8a\_ d1lixza\_ d1qvra2  
d1qvra3 d1qzma\_ d1sxjc2 d1jr3d2 d2p65a\_ d118qa2 d1g8pa\_ d3hu3a3  
d1sxjd2 d1njfa\_ d1in4a2 d1sxja2 d1tuea1 d2ce7a2 d1w5sa2 d1sxjb2  
d1d2na\_ d1ny5a2 d1ofha\_ d2gnoa2 d2a5yb3 d1fnna2 d1u0ja1 d1lv7a\_  
d1iqpa2 d2fnaa2 d1ixsb2 d4gita\_ d1sxje2 d1g41a\_ d1wgda1 d1wgg1  
d4q5eb\_ d1wjna1 d1se9a\_ d3n3kb\_ d1wz0a1 d1we6a1 d2m0xa\_ d2gbka\_  
d3rt3b1 d1wh3a1 d1sifa\_ d2ekek2 d4ii2b1 d4hk2a1 d1c3ta\_ d1m94a\_  
d1wgha1 d1ttna1 d1j8ca\_ d1wx8a1 d3v6cb1 d2ma9b\_ d4i6lb1 d1bt0a\_

d2jvca1 dliyfa\_ d2k1fa\_ dlwxva1 dlwf9a1 d1t0ya\_ d2io0b2 d1x1ma1  
d2gbma\_ dlzw7a1 d2m17a\_ dlud7a\_ dlwe7a1 d2lwpa\_ d2gbja\_ dlwjua1  
d1v6ea1 d1v86a1 d4eewa\_ dlwiaa1 d4icva\_ d4gu2a\_ d1wx7a1 d1wy8a1  
d4hjka1 d2faza1 d1v5oa1 d2h0ba\_ d2erfa\_ d1h30a2 d1h30a1 d3mw4a1  
d1pz7a\_ d2r1ba\_ d3v64a1 d1d2sa\_ d3bopa1 d3mw3a1 d1okqa2 d2bcgg1  
d2bcgg2 d1wioa4 d1ccza2 d1vcaa1 d1dr9a2 d1ic1a1 d2d9qb1 d2nxyb2  
d2dara2 d2dara1 d1wyha2 d2dloa2 d1rutx4 d1rutx3 d2cuqa2 d1x41a2  
d1x41a1 d1x3ha2 d1x3ha1 d2d8za1 d1x61a2 d1x6aa1 d1x6aa2 d2cora2  
d2cora1 d1v6ga1 d1v6ga2 d2d8za2 d1x64a1 d1x64a2 d2co8a1 d1x63a2  
d2dj7a2 d2dj7a1 d2cu8a2 d2cu8a1 d1g47a2 d1g47a1 d1j2oa1 d1wyha1  
d2dloa1 d1wiga1 d1wiga2 d2cupa2 d2cupa3 d1x68a1 d2d8ya2 d2d8ya1  
d1m3va2 d1x62a1 d1x68a2 d1x61a1 d1b8ta3 d1b8ta2 d2d8xa2 d2d8xa1  
d1x4ka1 d1x4ka2 d2cuqa1 d1m3va1 d2co8a2 d1j2oa2 d1x63a1 d2cura1  
d2cura2 d1x62a2 d21j7a\_ d1n4na\_ d2m8bb1 d2kyqa\_ d3psma\_ d1jkza\_  
d1jxca\_ d2g11a\_ d1ugla\_ d4uj0a\_ d1js9c\_ d1f15b\_ d1za7a\_ d1laja\_  
d1ex4a2 d1c6va\_ d1t0za\_ d2i61a\_ d1t1ta\_ d1sn4a\_ d1kv0a\_ d21kba\_  
d1npia\_ d1wwna\_ d1pe4a\_ d2kbka\_ d21i7a\_ d1djta\_ d2kbha\_ d1dq7a\_  
d1sega\_ d1omya\_ d1zywa1 d1jzaa\_ d1n9wa1 d1bbua1 d1e1oa1 d1c0aa1  
d1b8aa1 d1l0wa1 d3a74a1 d1bvsa3 d1ixra2 d1iyjb4 d1iyjb5 d1iyjb3  
d1o7ia\_ d4ipca1 d1x3ea\_ d4apva\_ d1jb7a1 d1jb7a2 d1jb7a3 d3kdfa\_  
d1uelb\_ d1wjja1 d3eiva\_ d1xjva2 d1xjva1 d2ccza2 d1se8a\_ d1l1oc\_  
d1jb7b\_ d1qvca\_ d3ulla\_ d1qzga\_ d1miua4 d1miua5 d1miua3 d3g48a1  
d1gd7a\_ d1mkha\_ d1jjcb3 d1pyba\_ d1y14b1 d2nn6i1 d1i94l\_ d2zjra2  
d1smxa\_ d2qamc2 d1hh2p1 d2r7da1 d1r12a2 d1wfga1 d3bzka4 d1x6oa2  
d3a0ja\_ d2j01d2 d2ja9a1 d4q15a\_ d1hr0w\_ d1luza\_ d2n3sa\_ d2vnud1  
d1h95a\_ d1go3e1 d2nn6h1 d2mola\_ d1iz6a2 d1jjga\_ d1e3pa2 d2ix0a3  
d2ix0a2 d21xja\_ d1ueba3 d1ueba2 d2z0sa1 d1u01a1 d2ix0a1 d2eifa2  
d2je6i1 d3i2za1 d2c35b1 d2ahob2 d1t9ha1 d3i4oa\_ d2qall1 d1jt8a\_  
d2nn6g1 d1g6pa\_ d3cama\_ d1i94q\_ d1c9oa\_ d1d7qa\_ d2ba0a1 d2vnud2  
d2vnud3 d1khia2 d2qalq1 d1wi5a1 d1xtda2 d1ny4a\_ d1dgsa2 d1fvial  
d1ckma1 d1x9na2 d2a1ka\_ d1je5a\_ d1rpma\_ d2shpa1 d1yfoa\_ d1l8ka\_  
d2ooqa1 d1g4us2 d1lara2 d1lara1 d1wcha\_ d2fh7a2 d2fh7a1 d1ohea1  
d1ohea2 d2f4da\_ d1rxda\_ d2hxpa\_ d1xria\_ d1fpza\_ d3ezza\_ d4y2ea\_  
d1i9sa\_ d3azya\_ d3wvja\_ d1upsa1 d1ajoa\_ d2hyka\_ d1ajka\_ d2vy0a\_  
d1o4ya\_ d3o5sa\_ d3d6ea\_ d3atga\_ d1lumza\_ d3i4ia\_ d1c11a\_ d41bqa\_  
d1a78a\_ d1slta\_ d4no4a\_ d3zsja\_ d3duia\_ d1g86a\_ d1is3a\_ d1qmja\_  
d1hlca\_ d1tdha3 d1q3ba3 d1ee8a3 d1k82a3 g1qmo.1 g1len.1 d3zyra\_  
d1fnya\_ d1n47a\_ g21tn.1 d1avba\_ d3usua\_ d1dhkb\_ d1f9ka\_ d1lukga\_  
d1g8wa\_ d1g9fa\_ d1wbfa\_ d3wcsa\_ d1g7ya\_ d1mvqa\_ d1hqla\_ d1v6ia\_  
d1dbna\_ d1qnwa\_ d1fx5a\_ d418qa\_ d1ioaa\_ d3n35a\_ d3ubra\_ d1qo8a1  
d1d4ca1 d2k3va\_ d1ft5a\_ d1qdba\_ d1m1qa\_ d2j7aa\_ d1h21a\_ d1ogyb\_  
d4fasa\_ d1jnia\_ d1oaha\_ d1sp3a\_ d3h33a\_ d1rwja\_ d19hca\_ d1os6a\_  
d3bxua\_ d3h4na\_ d1i77a\_ d3caoa\_ d1j0pa\_ d2ctha\_ d1duwa\_ d2e84a\_  
d1hh5a\_ d1gyoa\_ d3h34a\_ d1dszb\_ d1a6ya\_ d3cbba\_ d1ynwa1 d1r4ia\_

d1hcqa\_ d2hana\_ d2hanb\_ d2enval d1kb4b\_ d2n11b\_ d1lola\_ d1cita\_  
d1adqa1 d1fnga1 d1uvqb1 d1zs8a1 d2vola1 d2vola2 d1mfbl2 d2jelh2  
d1uwe12 d3qq4b1 d1kjob\_ d1k5na1 d1osph2 d4odhl2 d1low0a1 d1low0a2  
d1bfob2 d3l9ra2 d3jttth1 d2fath2 d4elkb2 d1fn4b2 d2xfxb\_ d1pg7x2  
d1cqka\_ d4k71b2 d1l2a1 d1eapb2 d4lfhg2 d1i4fa1 d2nw2a2 d1kfah2  
d1mhca1 d1h3ua1 d1wejh2 d1h0db2 d1a5fh2 d1kcvh2 d1mjuh2 d1qqda1  
d1kcrh2 d1k8ia1 d3huja2 d2nnab1 d1nfd2 d3mffb2 d1s9va1 d1l3h2  
d1q0xl2 d1fv1b1 d1neza1 d4rfeb2 d1r3ha1 d1a6tb2 d1kjva1 d1pz5b2  
d1onqa1 d2bc4a2 d1de4a1 d1k8da1 d1tcra2 d1dn0b2 d1nfd2 d2xwtb2  
d1bfoa2 d1mexh2 d1iakb1 d1ypzf2 d4f7ea2 d1q72l2 d2fbjh2 d1fe8h2  
d1clzh2 d1fngb1 d1uvqa1 d1vgka1 d1c16a1 d4j12a2 d4x99b2 d1igtb3  
d1je6a1 d1q72h2 d1nldh2 d1teth2 d2hmic2 d1ilca2 d1ilca1 d1k8ib1  
d1q0yh2 d1kfa12 d3frua1 d1pg7w2 d1u58a1 d1igyb4 d1igyb3 d1hyrc1  
d1klub1 d1deeb2 d1c12b2 d2bc4b2 d2ig2h2 d1kcv12 d3wn5b1 d1l2b\_  
d1l3l2 d1mjul2 d1sm3h2 d1q0xh2 d1zvsa1 d1ydpal d1u8ib2 d1ypze2  
d1kcu2 d1op9a\_ d1y0la1 d1letzb1 d1legj11 d2gsib1 d1nj9a1 d4jfhd1  
d1aqk11 d1t2ja\_ d1l04h1 d1zvya1 d3v4v11 d4enec1 d1kxtb\_ d5e8ea1  
d2pxya\_ d4weud\_ d1xiwc\_ d2esvd1 d1qznh\_ d1logae1 d1f4xh1 d4n1hb\_  
d3ezjb1 d3mlw11 d1kfah1 d1etza1 d1b4jh1 d3cfic\_ d4w68a\_ d2arja1  
d1ek3a\_ d2ok0l1 d1vera\_ d1uwgh1 d1blnb1 d1fpth1 d1rzga1 d2giya1  
d4m3kb1 d1nc2a1 d2nyyd1 d1ncna\_ d1fbih1 d5dxwa\_ d4fqqa1 d1dqdh1  
d1jfq11 d1kelh1 d1faih1 d1frgl1 d1figl1 d4m6n11 d1fo0a\_ d4hxb11  
d3b5ga\_ d3quyd1 d2h9gb1 d1i8kb\_ d2dd8h1 d2ck0h1 d1eaja\_ d4w6wb1  
d2a6ib3 d1t66d1 d2e27h\_ d1ob1b1 d1f11b1 d2v7na1 d1ad0a1 d2xt1b1  
d1pskh1 d4i13b1 d2op4l1 d1a0q11 d1uwe11 d1za3a1 d1ncb11 d4uu9a\_  
d1bm3h1 d1cloh1 d1nqba2 d1cf8h1 d4y5va\_ d1mhph1 d5anma1 d4cdgc1  
d4ldeb\_ d1y0lb1 d2pcpb1 d1z3gl1 d1dfb11 d1fh5h1 d3g5xa1 d1tzib1  
d4dn3l1 d3zhka1 d2b1hh1 d2uyla1 d1f3dh1 d1nj9b1 d2agjh1 d2h1pl1  
d1q72h1 d8fabbl d1ndmb1 d1rjca1 d4u6hb1 d3upca\_ d2fbj11 d1osph1  
d1tvda\_ d2c2vh\_ d4fhbd1 d1bd2d1 d1rz7h1 d3nn8a\_ d1knoa1 d1nfdal  
d2bmkb1 d1dq11\_ d1igyb1 d1igf11 d12e8h1 d3utza1 d1nc2b1 d1rihh1  
d4mwfb1 d4jvpa1 d1mieh1 d1rhfa1 d1fgn11 d1sbsh1 d1lp9e1 d1dn0a1  
d4lqf11 d1iaih1 d1kgcd1 d1mh5b1 d1gpol1 d2g60h3 d1f8t11 d2jixd1  
d4grwh\_ d1fo0b\_ d1bfob1 d1axsa1 d1u9ka\_ d1nmbh\_ d1h8na1 d1h8na2  
d1jguh1 d4eura1 d3sdy11 d35c8h1 d1w72l1 d1mvub\_ d1i9rh1 d1ob1a1  
d4wenb\_ d1yeeh1 d3ietc1 d1f58h1 d1ad0b1 d1mqk1\_ d1nbvh1 d4b50a\_  
d3r8bb\_ d1baf11 d1mamh1 d4rgne1 d2gsgb\_ d35c8l1 d1bafh1 d1ai1h1  
d2pcpa1 d2fath1 d2x1pa\_ d1orsb1 d1libgl1 d1shma\_ d1a2yb\_ d1u0qa\_  
d2coqa\_ d1hilb1 d1qfwi\_ d1jv5b\_ d1fn4b1 d5e0qa\_ d1nsnh1 d1plgl1  
d4ocxl1 d1kb5h1 d1rzhf1 d1pg7x1 d2fx7h1 d2oi9c\_ d1l7il1 d3eyva1  
d1d5il1 d4ffyl\_ d1tet11 d1a6wh\_ d1lac6a\_ d3dvfa\_ d1nfdel d1mimh1  
d1ri8a1 d1jhlh\_ d3dura\_ d1fskb1 d1f97a1 d3so3b1 d2ak4d1 d1lp9f1  
d4z7wf1 d1l7th1 d4y5ya\_ d4x7ec1 d1emth1 d1ikf11 d1nlbh1 d4utal1  
d1bjma1 d1eapb1 d1u6ah1 d2dtgd1 d1kj2b\_ d1xeda1 d1cleh1 d1fgvh\_

d2bnub1 d2fb4h1 d2dtgb1 d1ktrh\_ d1jpth1 d1qkz11 d4hepg\_ d2atpb1  
d1flrh1 d2hrpl1 d1mvfa\_ d1iaim1 d3k80a1 d2jb5h1 d3zkxc\_ d4grwe\_  
d1it9h1 d1rhhb1 d3w9ec\_ d1e4wh1 d1sy6h1 d2j6eh1 d3qxta\_ d1jglh1  
d1p7ka1 d1tzhb1 d4n8pa1 d1gaf11 d2jelh1 d1wioa2 d4i0cc1 d1cicb1  
d1lmka2 d1lmka1 d1iqwh1 d1orqb1 d1ejoh1 d1jnlh1 d4zg1a\_ d43c9b\_  
d1ggb11 d1wejh1 d3q6fa1 d1f3dj1 d3c6la1 d1bqlh1 d3p9wb\_ d1a3r11  
d1h0db1 d2uzil\_ d1eo811 d1qfwl\_ d1n7ml1 d1igja1 d1c5ch1 d2a9mh\_  
d1rmfh1 d1fj1b1 d4heme\_ d1ccza1 d1a5fh1 d1ogad1 d1dlfh\_ d1qa9b\_  
d1vgel1 d3qskb\_ d1sjxa\_ d4ozfg1 d1sq2n\_ d1qd0a\_ d1kcvh1 d1c5db1  
d3qcull d8faba1 d3bn9d1 d1mjuh1 d4y8dc\_ d7fabh1 d3dvgb1 d1lo011  
d1a6tb1 d1gigh1 d1kcrh1 d2hwz11 d1yjdc1 d3clfl1 d4krna\_ d1dl71\_  
d1e6ol1 d1mexh1 d3r0ma\_ d4kkna\_ d1fns11 d1oaqh\_ d1rzia1 d1lucb1  
d1ncw11 d4b41a\_ d1nfd1 d2mpah1 d2d7t11 d4grwf\_ d4b5ea\_ d1lk3h1  
d3u79a\_ d4u3xa\_ d1ghf11 d1bvkb\_ d1mcww1 d1b88a\_ d1jrhh1 d32c2b1  
d4wemb\_ d1dsfh\_ d1op3h1 d1ce111 d1iqda1 d1qoka1 d1qoka2 d1qfuh1  
d2crya1 d1ay1h1 d1oaql\_ d3ab0b\_ d1rur11 d1t4kb1 d1bz7b1 d1n0xh1  
d1for11 d1lucb11 d4w6yb\_ d43c9a\_ d2aabl1 d1tzia1 d4n1ca\_ d1k6qh1  
d3g9ab\_ d4tvsa1 d1igmh\_ d1pz5b1 d3dx9a1 d3wxwh\_ d1nakh1 d1kcull  
d3eaka\_ d4qlra1 d1cr911 d1d9ka\_ d1f4x11 d1deea1 d2i27n2 d1c12a1  
d2orb11 d1j8hd1 d1mcph1 d1c5da1 d1kenh1 d1bd2e1 d1h5ba\_ d4x7fc1  
d3upaa\_ d1t3fa1 d1indh1 d2dtgc1 d4hc111 d1zv5a1 d4wgvb\_ d1uwgl1  
d4f37k1 d1aqkh1 d1vesa\_ d3zkqd\_ d1fpt11 d1lo411 d1knob1 d3rrqa\_  
d1ct8b1 d4orz\_ d1mlbb1 d4hgkc1 d1dqdl1 d1bogb1 d4ozhe1 d1dr9a1  
d1i7za1 d1dn0b1 d1kell1 d1rzib1 d1ypzf1 d1wtla\_ d1hkfa\_ d1fail1  
d1figh1 d2vyre\_ d1sjva\_ d1ohqa\_ d1bfoa1 d1pkqb1 d1mjul1 d1b4j11  
d1nsn11 d2arjb1 d1p4bh\_ d4aj0a\_ d3nn8b\_ d2rcja1 d1f2xk\_ d4v1dd\_  
d1adqh1 d2eksa\_ d4k3ga\_ d1jfqh1 d1uweh1 d1frgh1 d4gftb\_ d1uz8b1  
d4n1ea\_ d1bm311 d1clo11 d3mcka1 d2vq1a1 d1ae6h1 d4aq1b1 d1uj3b1  
d1nbqa1 d1fh511 d2ck011 d2ywza\_ d1q7211 d4nxbx\_ d1hila1 d4hz1b1  
d2j8811 d1zmya1 d1cd0a\_ d1a4ka1 d1psk11 d1a0qh1 d4krmb\_ d1ncbh1  
d2fbjh1 d1j8he1 d1i3ua\_ d1cf811 d1fe8h1 d2plya1 d1eeqa\_ d2x89a\_  
d1ol0a\_ d2r0lh1 d1ub5a1 d1dfbh1 d3eyvb1 d4jdvb1 d4p2cg\_ d2gsia1  
d2agj11 d1u3ha1 d2h1ph1 d1rih11 d1fskc1 d1boga1 d2a7711 d1ospl1  
d1qfoa\_ d3dwta\_ d2fx711 d1rz711 d3stba1 d1pkqa1 d1b6da1 d1dzba2  
d1dzba1 d1kj2a\_ d4l1ha\_ d1rzgb1 d1dq1h\_ d12e811 d1miel1 d1jmaa\_  
d1sbs11 d1fgnh1 d1f5811 d1mqkh\_ d1ndgb1 d3qegl1 d1ia11 d2aw2a1  
d1tqbc1 d3fo2a1 d4dkaa\_ d1f8th1 d2g6011 d2ywya\_ d1uj3a1 d1yc7a\_  
d3bd3a\_ d4w6xb1 d1nmb1\_ d1i8ka\_ d1rj1b1 d1ypze1 d1p7kb1 d1kxqe\_  
d1gpoh1 d2z4qa1 d1w72h1 d1i9r11 d4qgya1 d4xt1c\_ d2qqnh1 d1cical  
d3c08h1 d2cd0a\_ d2bdnh1 d1hnga1 d1mam11 d1nldh1 d1cr9h1 d4lcih1  
d3bkyh1 d3qg711 d1ai111 d1kxvc\_ d4iosd\_ d117ih1 d2x1qa\_ d1ub6b1  
d3k74b\_ d1libgh1 d1teth1 d1igya1 d1hxma1 d2x6ma\_ d2e7la\_ d5e03a\_  
d1qfwm\_ d2r0kh1 d1igjb1 d1rurh1 d1plgh1 d1mj8h1 d1yuhb1 d3fmgl1  
d1rzf11 d1emt11 d1ad9b1 d1igtb1 d1nlb11 d1d5ih1 d3k7ua\_ d4ffyh\_

d1bwwa\_ d3dvga1 d1a6ta1 d1fgvl\_ d4qxgl1 d1miml1 d1jh11\_ d2hffb1  
d2hh0l1 d1qkzh1 d1l7tl1 d1afvh1 d1iaii1 d2cjuh\_ d1um5h1 d2ghwb2  
d2ghwb1 d1kgce1 d2fgwh1 d1likfh1 d1dvfd\_ d2i24n1 d2xtjb\_ d1za3b1  
d2yc1a\_ d2hh0h1 d2x1oa\_ d1bvka\_ d1rjla1 d5e7ba1 d1igta1 d1il1b1  
d2fb4l1 d1mvua\_ d1jptl1 d32c2a1 d1fvca\_ d1iqdb1 d2hrph1 d2p4ab\_  
d4qo1a\_ d1p2cb1 d1wt5c\_ d1t4ka1 d5c1mb\_ d1it9l1 d1bz7a1 d1b2wh1  
d1e4wl1 d1jnl11 d1yedb1 d1za6b1 d3u7aa\_ d1igfh1 d3gnml1 d1orsa1  
d1wej11 d1a2ya\_ d1hxmb1 d1gafh1 d2j4wh1 d1pz5a1 d1j05a\_ d1a3rh1  
d4fq1l1 d1qfwh\_ d1eo8h1 d1n7mh1 d4s11a\_ d1kegh1 d5da4a\_ d1iqwl1  
d3whxb1 d1vgeh1 d1deeb1 d1c12b1 d1t2ql1 d1ad9a1 d3gsnb1 d3b2uc1  
d1ggbh1 d1t3fb1 d1nakl1 d4ocmc\_ d1lila1 d2v7hb3 d2esve1 d1mcoh1  
d2qr0b1 d2q3aa\_ d1ct8a1 d1kcr11 d2pxyb\_ d2uzih\_ d5c3ld\_ d3durb\_  
d1c5cl1 d2ak4e1 d1d17h\_ d1xiwd\_ d1mlba1 d1rmfl1 d1i7zb1 d1dlfl\_  
d2xa3a\_ d5bq7b1 d1dqqb1 d3h42l1 d1legjh1 d1kcv11 d1fe8l1 d2j6e11  
d1f3rb2 d1l1k3l1 d1sm3h1 d1q0xh1 d1ghfh1 d7fab11 d1igch1 d1lo0h1  
d4idla\_ d5c2bl\_ d1jrh11 d1il1a1 d3zhda1 d4kfzc\_ d1b0wa\_ d1e6oh1  
d1mex11 d4krpb\_ d1fnsh1 d1ncwh1 d4hgma\_ d4eigb1 d4rzca\_ d2mpa11  
d4y5xa\_ d5en2b1 d3lrga1 d4ej1c1 d1rhha1 d1j05b\_ d1forh1 d1q9wb1  
d2wzpd\_ d2aq2a1 d1h0da1 d3revb1 d2ij0c1 d1tzha1 d4m7j11 d1k6ql1  
d3b9kc1 d1igml\_ d3qeua1 d1dsfl\_ d1ce1h1 d1kcu11 d1zvha1 d1zvoa1  
d1tqbb1 d1ay1l1 d2qsc11 d2cgrh1 d1nl0h1 d1ken11 d3eo0a1 d4n9ob1  
d1n0xl1 d3k1kc\_ d2aq2b1 d1ck1a1 d1enfa1 d1i4pa1 d1vloa1 d1et9a1  
d1esfa1 d2g9hd1 d4ohja1 d1klud1 d1bxta1 d1ty0a1 d1fnua1 d1c4qa\_  
d1prtcl d2wv6d\_ d1prtfl\_ d1ltrd\_ d4l63b1 d1r4pb\_ d1prtd\_ d1tl0f\_  
d2bosa\_ d1prtb1 d3chbd\_

**Family-46 (c.1.8.3)**

**Positive dataset contains 32 protein sequences.**

d1wkya2 d3wh9a\_ d4mlra\_ d4xuya\_ d2je8a5 d4bf7a1 d3cuia\_ d1ur4a\_  
d2vzsa5 d2x2ya1 d4y7ea1 d4k68a\_ d2v3ga\_ d4hpga\_ d3ziza\_ d4bs0a\_  
d1ta3b\_ d1w91a2 d1tvna1 d3nyda1 d2cyga1 d4xv0a\_ d2c8na2 d1w32a\_  
d3emca\_ d1v6ya1 d2uwfa1 d2fgla\_ d3niya1 d2c0ha1 d1rh9a1 d1yq2a5

**Negative dataset contains 4024 protein sequences.**

d1m32a\_ d1libja\_ d1c7na\_ d1liuga\_ d4q75a\_ d2bkwa1 d1t3ia\_ d1n8pa\_  
d1qz9a\_ d1jff9a\_ d1leg5a\_ d3kgwa\_ d1cl1a\_ d2ctza1 d1vjoa\_ d2rfva\_  
d1gc0a\_ d1cs1a\_ d1d2fa\_ d2ch1a1 d1qgna\_ d1pffa\_ d1elua\_ d1u08a\_  
d1lc5a\_ d1b5pa\_ d2ay1a\_ d1bw0a\_ d3pd6a\_ d7aata\_ d2csta\_ d1j32a\_  
d1fg7a\_ d4wlha\_ d1o4sa\_ d1v2da\_ d1gdea\_ d1m6sa\_ d1v72a1 d1svva\_  
d1ajsa\_ d1wsta1 d2f8ja2 d1l1k9a\_ d1vp4a1 d1xi9a1 d2gb3a1 d1js3a\_  
d3rcha\_ d3k40a\_ d2cfba1 d1dfoa\_ d1o69a\_ d1bj4a\_ d3k28a\_ d2bwpa\_  
d3lg0a\_ d2fnua\_ d3ou5a\_ d1z7da1 d1b9ha\_ d1iaya\_ d4msoa\_ d1s0aa\_  
d1sffa\_ d3tqxa\_ d1mdoa\_ d3qboa\_ d3pgya\_ d1bjna\_ d2dkja\_ d1ejia\_  
d1vefa1 d4wxga\_ d3bs8a\_ d3gbxa1 d1w23a\_ d1g8fa3 d1f56a\_ d1bypa\_  
d1azca\_ d1ws8a\_ d3u25a\_ d1cuoa\_ d1lid2a\_ d1rkra\_ d2iaac\_ d4dp1x\_  
d1nwpa\_ d2gima\_ d2i7sa\_ d1qhqa\_ d3ehbb1 d1fftb1 d1gyca3 d1hfua2

d1kbva1 d1kbva2 d1sdda1 d1sdda2 d1gyca1 d1gyca2 d1mzya1 d2bw4a1  
d1aoza1 d1aoza3 d1aoza2 d1kyaa2 d1kyaa3 d1mzya2 d4e9sa1 d1sddb1  
d1sddb2 d1hfua1 d1hfua3 d1oe1a2 d1oe1a1 d1v10a2 d1v10a3 d1v10a1  
g1f8v.1 d2bbvc\_ g1or0.1 g1cp9.1 g1e3a.1 d1a3qa1 d1iknc\_ d3brda1  
d1p7h11 d1oy3c\_ d1imhc1 d1zk9a1 d2cxka1 d2bema\_ d1pama1 d1qhoa1  
d2fhfa2 d2fhfa1 d1k3ia1 d1j0ha1 d1cxla1 d2bhua1 d1edqa1 d1f1sa2  
d1ut9a2 d1gvia1 d1txka1 d2phla2 d2phla1 d1fxza2 d1fxza1 d1lrha\_  
d1uija1 g1dgw.1 d2v09a\_ d1uika2 d1uika1 d1dgwa\_ d1lep0a\_ d2pa7a1  
d1wlta1 d1nxma\_ d2c0za1 d1ds6b\_ d1fstb\_ d3us3a3 d3us3a1 d3ulra1  
d1g9ka2 d1kapp2 d2bjca1 d2hsga1 d1qpza1 d1efaa1 d1ydw2a d2nvwa2  
d1zh8a2 d1qkia2 d1xeea2 d1tlta2 d1r0ka3 d1vkoa2 d1vm6a2 d3qvsa2  
d1gr0a2 d1p1ja2 d2ovga\_ d1sq8a\_ d1rzsa\_ d3kz3a\_ d3orca\_ d3gpdg2  
d2q49a2 d1hdgo2 d2g17a2 d2cvoa2 d2czca1 d3pwka2 d1lobfo2 d1i32a2  
d1zyao2 d2pkqo2 d1b7go2 d2hjsa2 d1vkna2 d1nvmb2 d1ux8a\_ d1dlya\_  
d4i0va\_ d2bkma\_ d1dlwa\_ d2bmma\_ d2msya\_ d2djoa1 d2r5za\_ d1au7a1  
d1f43a\_ d2lmda1 d1akhb\_ d1s7ea1 d3nara\_ d1zq3p1 d2craa1 d1mija\_  
d4uuta\_ d3a01a\_ d1x58a1 d3rkqa1 d3cmya1 d2cqxa1 d2da6a1 d1e3oc1  
d1fjla\_ d1mh3a1 d1ig7a\_ d1x41a1 d1wh7a1 d1gt0c1 d2mw8a\_ d1lfup\_  
d1x2ma1 d1b72a\_ d1wi3a1 d1wjha1 d1x2na1 d1mnmc\_ d2cuea1 d3k2aa\_  
d2hosa\_ d2jwta2 d1pufa\_ d1oetc1 d2hi3a\_ d1b8ia\_ d4j19a\_ d3lnqa\_  
d1wh5a1 d1b8ib\_ d1fexa\_ d2cqra1 d1guua\_ d1lug2a1 d2cqqa1 d2ajea1  
d4a69c\_ d1h8ac1 d2crga1 d2iw5b1 d1xc5a1 d2cu7a1 d1wgxa1 d2cjja1  
d2ckxa1 d1gvda\_ d1hcra\_ d1tc3c\_ d1u78a2 d1igna2 d2iu5a1 d1zk8a1  
d2g7sa1 d2fd5a1 d2np5a1 d1z0xa1 d2id6a1 d2d6ya1 d2i10a1 d1vi0a1  
d2oi8a1 d3c07a1 d2ns7a1 d2fq4a1 d2yvea1 d1t33a1 d2o7ta1 d1rkta1  
d2np3b1 d2g7ga1 d2gena1 d2fbqa1 d2g7la1 d2gfna1 d2g3ba1 d2jj7a1  
d2hyja1 d1sgma1 d1ui5a1 d2hkua1 d2id3a1 d4jyka1 d1b10a1 d1b10a2  
d1d5ya1 d3lv8a\_ d1s3ga1 d1zaka1 d1s4qa\_ d3tvta2 d1uf9a\_ d1khta\_  
d1ckea\_ d1osna\_ d1p5zb\_ d4tmka\_ d3cm0a\_ d1tmka\_ d1jaga\_ d3h86a\_  
d1t0hb\_ d2h92a\_ d3kb2a1 d2c95a1 d1yj5a2 d1kgda\_ d1ly1a\_ d2ak3a1  
d1vyva2 d1deka\_ d2grja1 d1p3ja1 d1y63a\_ d1e4ya1 d1s96a\_ d3iija1  
d1lvga\_ d1nksa\_ d1vyua2 d4e22a\_ d1qf9a\_ d1jjva\_ d1q3ta\_ d1ki9a\_  
d1lw7a2 d1teva\_ d1kjwa2 d1gsia\_ d1g3ma\_ d1j99a\_ d1t8ta1 d1lnsta\_  
d1fmja\_ d1zrha\_ d1ls6a\_ d2a3ra\_ d1aqua\_ d2zptx\_ d3ckla\_ d1teta\_  
d1q44a\_ d2gwha\_ d1odfa\_ d1uj2a\_ d4gi7a\_ d2jeoa1 d1rz3a\_ d1z0ja1  
d3umra2 d3gj0a1 d2gaoa1 d1yzga1 d1x3sa1 d1g7sa4 d1puja\_ d1udxa2  
d1kk1a3 d2o52a\_ d1jwyb\_ d1zcaa2 d1zcba2 d2fv8a1 d2cjwa\_ d3dz8a1  
d1xzpa2 d1vg8a\_ d4qxaa\_ d2ew1a1 d1x1ra1 d2bcgy\_ d3doea1 d3cona\_  
d3rega\_ d3wyga\_ d1upta\_ d2b6ha1 d1zd9a1 d1lnza2 d1r5ba3 d1n0ua2  
d1r2qa\_ d2f91a1 d2rhda\_ d3q3jb\_ d3q85a\_ d1efma1 d1r8qa\_ d2gf9a1  
d2akab1 d1ek0a\_ d1z08a1 d2gcoa1 d2dy1a2 d4g01b\_ d2cxa1 d1svia\_  
d3q72a\_ d1ni3a1 d4ac9a4 d2erxa1 d2bmea\_ d1wxqa1 d2gf0a1 d4ldja1  
d1zunb3 d1d5ca\_ d4lv5b\_ d1efca3 d1kmqa\_ d2g6ba1 d3lrpa\_ d1tada2  
d2y8ea\_ d4rd4a1 d1z06a1 d2heia\_ d3a58b\_ d1u01a2 d1d2ea3 d1zj6a1

d2ocba\_ d3rwoa\_ d1mr3f\_ d2e9sa1 d4u5xa1 d2iwra\_ d2fn4a1 d3bwdd\_  
d2nzja1 d2atva1 d2ksqa\_ d3l43a\_ d1mkya2 d1mkya1 d1wmsa\_ d1jnja3  
d2rmka\_ d1f6ba\_ d1f60a3 d1gota2 d1jala1 d2fh5b1 d1g16a\_ d2wblc\_  
d1m7ba\_ d1wf3a1 d1f5na2 d1t9ha2 d1z6xa1 d1z0aa1 d2fg5a1 d2a5ja1  
d2bcjq2 d1s0ua3 d1ky3a\_ d4y0va\_ d4lhwa\_ d2qmea1 d2atxa1 d1egaa1  
d1ryha\_ d1moza\_ d1nrjb\_ d2erya1 d3bfka\_ d1puia\_ d3j3az1 d3t5ga\_  
d1shza2 d3defa\_ d2f7sa1 d3raba\_ d3tsoa\_ d3aq4a\_ d2a17a1 d3sfva1  
d3bc1a\_ d2ncda\_ d1sdma\_ d3h4sa1 d2heha\_ d2grya\_ g3kin.1 d1kk8a2  
d1br2a2 d1goja\_ d1f9va\_ d1lkxa\_ d3t0qa\_ d4db1a1 d3gbja\_ d1ry6a\_  
d1v8ka\_ d1ogpa1 d1kb0a1 d1k8ka2 d1k8ka1 d3uleb1 d3i33a2 d3i33a1  
d1bupa1 d1dkgd2 d1dkgd1 d4ci6a2 d1jcf1 d4a2ba2 d2fxua1 d1yaga2  
d1yaga1 d4cbua2 d1iqca2 d1iqca1 d1eb7a2 d1nmla2 d1nmla1 d3h3no1  
d3h3no2 d3ezwa2 d1hroa\_ d4gedb\_ d3zooa\_ d1mz4a\_ d1gu2a\_ d1f1fa\_  
d1dvva\_ d1c6ra\_ d1c75a\_ d1e29a\_ d1gdva\_ d1cnoa\_ d1h32b\_ d1co6a\_  
d2bh4x\_ d2aiua\_ d5cytr\_ d1jdl1 d1i8oa\_ d2zboa\_ d3dmia\_ d1ls9a\_  
d1wvec\_ d2yk3a\_ d3ph2b\_ d1dw0a\_ d5aura\_ d1ql3a\_ d1qn2a\_ d1f1ca\_  
d2nqya\_ d1h4ga\_ d1hixa\_ d1oa2a\_ d1olra\_ d3b7ma\_ d4h7ma1 d3wp3a\_  
d2vgda\_ d1ligoa\_ d3zsea\_ d2nlra\_ d3wx5a\_ d1oa3a\_ d1pvxa\_ d1m4wa\_  
d1f5ja\_ d1oa4a\_ d4ix1a1 d2a6za1 d3a4ua\_ d2a6va1 d2ah2a1 d1evsa\_  
d1cnt1\_ d1pvhb\_ d1z7ca\_ d1huwa\_ d1bgea\_ d1rhga\_ d1f45b\_ d1i1rb\_  
d1axia\_ d1etea\_ d3tgxb\_ d1scfa\_ d2z3qa1 d3qb1a\_ d1hula\_ d1m48a\_  
d4nkqb\_ d1eera\_ d1v7mv\_ d5e4ea\_ d2o27a\_ d3b5ka\_ d2psma1 d4zf7a\_  
d3uf5a\_ d4x51a\_ d1d9ca\_ d4ypgc1 d3oq3a\_ d1n1fa\_ d1aula\_ d1wu3i\_  
d3bes1\_ d3ux9a\_ d3rbaa\_ d2qtra\_ d1nupa\_ d3l92a\_ d1f9aa\_ d1qjca\_  
d2h29a\_ d1vlha\_ d1lod6a\_ d1lw7a1 d1mrza2 d4ruka\_ d2el7a\_ d1iq0a2  
d1irxa2 d1r6ta2 d1ivsa4 d2cyba\_ d1rqga2 d1j09a2 d2yxna\_ d1f7ua2  
d1h3fa1 d1ffya3 d2g36a1 d1nzja\_ d1jila\_ d1i6la\_ d1pfva2 d1h3na3  
d3n9ia\_ d3sz3a1 d3sw2a\_ d1moxc\_ d1dx5i3 d1edmb\_ d1autl2 d1autl1  
d1nqlb\_ d1dva11 d1szba2 d1kigl\_ d2y5f1\_ d1ijqa2 d1gk5a\_ d1g1sa2  
d1nt0a3 d1xdtr\_ d1lmja2 d1lmja1 d1nzia2 d2wphe\_ d1klil\_ d1pfxl2  
d1pfxl1 d1p9ja\_ d1g1ta2 d1f7ea\_ d4yzub\_ d2mgpa1 d1b9wa2 d2mgpa2  
d1oblcl d1oblcl d1n1ia2 d1n1ia1 d2npra2 d2npra1 d1m1xb4 d1qx2a\_  
d1ig5a\_ d2y5ia\_ d1psra\_ d3n22a\_ d2egda\_ d4ggfc\_ d2wcea\_ d2luca\_  
d4aqia\_ d3nsia\_ d2lp3a\_ d1j55a\_ d1a4pa\_ d1k8ua\_ d1nsha\_ d1pvaa\_  
d3fs7a\_ d1ttxa\_ d1rwya\_ d2kyfa\_ d1rk9a\_ d1a75a\_ d1exra\_ d1tizal  
d1nyaa\_ d1g8ia\_ d1ggwa\_ d1wdcc\_ d3fwba\_ d1ggza\_ d2o5ga\_ d1ctaa\_  
d1m45a\_ d3i5gc\_ d1sl8a\_ d1fpwa\_ d2scpa\_ d2roaa\_ d4aqra\_ d3pn7b\_  
d1br1b\_ d2mysb\_ d1s6ca\_ d1bjfa\_ d2obha\_ d1jfka\_ d1jf0a\_ d1qv0a\_  
d1lkja\_ d2mlfc\_ d2m97a\_ d2d8na\_ d4by5a\_ d1jbaa\_ d4nqga\_ d1wdcb\_  
d2mysc\_ d1j7qa\_ d1s6ia\_ d1uhka2 d1r2ua\_ d1dtla\_ d3kf9a\_ d3pn7c\_  
d5d67d\_ d1tuza\_ d1h8ba\_ d1eg3a1 d1eg3a2 d2zkmx1 d1snla\_ d1gjya\_  
d1y1xa\_ d1hqva\_ d1dvia\_ d1df0a1 d1qxp2 d4usla\_ d1k94a\_ d1etob\_  
d1umqa\_ d1e5wa2 d1j19a2 d1isna2 d2a16b2 d3syxa1 d2p8va\_ d1xoda1  
d1i7aa\_ d1evha\_ d1qc6a\_ d1legxa\_ d1b9ra\_ d1offa\_ d1frra\_ d3wcqa\_

d1e9ma\_ d1l5pa\_ d1lwria\_ d1i7ha\_ d3av8a\_ d1czpa\_ d1rfka\_ d3p1ma1  
d3b2ga\_ d2bt6a2 d1wgqa1 d1v89a1 d2coda1 d1zc3b\_ d1wg7a1 d1u5ea1  
d1v61a1 d2coca1 d2ys1a1 d1v5pa1 d1ntya2 d1wjma1 d1wi1a1 d1u29a\_  
d1xx0a1 d1unqa\_ d2zkmx3 d1fhoa\_ d1v88a1 d2adza1 d1x1fa1 d1p6sa\_  
d2coaa1 d1btka\_ d1v5ma1 d1faoa\_ d2x18a\_ d1dyna\_ d1x1ga1 d4kaxb\_  
d2j59m1 d1ki1b2 d1xcga2 d1txda2 d1u5da1 d1w1ha\_ d1upqa\_ d1v5ua1  
d1foea2 d2fj1a1 d1eaza\_ d2dfka2 d2cofa1 d1kz7a2 d1h6ua1 d9ldta1  
d2ewda3 d1up7a1 d2dfda1 d1s6ya1 d1vjta1 d7mdha1 d1hyea1 d1t2da1  
d1oj3a3 d1b8pa1 d1ldna1 d1hyha1 d1civa1 d2a92a1 d1ez4a1 d1i0za1  
d1y6ja1 d1gv0a1 d1ur5a1 d1l1da1 d1obba1 d1v8ba1 d1gdha1 d1l7da1  
d2dlda1 d1mx3a1 d1ygya1 d1qp8a1 d1li4a1 d1j4aa1 d2naca1 d1npya1  
d3t4ea2 d1a4ia1 d1o0sa1 d2hk9a2 d2egga2 d1b26a1 d1bvua1 d1gq2a1  
d1c1da1 d1leha1 d1gtma1 d1nvtal d3dona2 d1edza1 d1gpja2 d1vi2a1  
d1p77a1 d1nyta1 d1b0aa1 d1vl6a1 d1v9la1 d1txga2 d3f47a1 d1mv8a2  
d2pv7a2 d1xc2a3 d2ahra2 d4xiya1 d2f1ka2 d1pgja2 d1i36a2 d1np3a2  
d1lj8a4 d1teaa3 d1qmg2 d2i76a2 d2g5ca2 d1wdka3 d1dlja2 d3cuma3  
d1kola2 d1f8fa2 d1qora2 d1jqba2 d1vj0a2 d1cdoa2 d1gu7a2 d1d1ta2  
d1xa0a2 d2dm6a2 d1jvba2 d1rjwa2 d1llua2 d1h2ba2 d1tt7a2 d1piwa2  
d1o89a2 d1iz0a2 d1e3ja2 d1yb5a2 d1uufa2 d1vj1a2 d1e3ia2 d3gpdg1  
d1vc2a1 d2nvwa1 d1u8fo1 d1ydwa1 d1hdgo1 d2g17a1 d1cf2o1 d2czca2  
d1r0ka2 d1obfo1 d2cvoa1 d1ebfa1 d1h6da1 d1i32a1 d1zh8a1 d2q49a1  
d1qkia1 d1j5pa4 d3pzra1 d1xeea1 d1vkoa1 d1vm6a3 d3qvsal d2pkqo1  
d1b7go1 d1gr0a1 d1p1ja1 d1lc0a1 d1j0xo1 d3pwka1 d2hjsa1 d1zyao1  
d1vkna1 d1tlta1 d1nvmbl d3sjua\_ d3ojfa1 d1xu9a1 d2jjya1 d1n7ha\_  
d1y1pa1 d1h5qa\_ d1jtva\_ d4fs3a\_ d2bkaa1 d1gy8a\_ d2c5aa1 d1ulsa\_  
d1ooea\_ d2b69a1 d1y5ma1 d1spxa\_ d1aela\_ d1bxka\_ d1ydea1 d1gega\_  
d1hdoa\_ d1o5ia\_ d1e6ua\_ d1snya1 d2rhca\_ d3zv4a\_ d5ceja\_ d2d1ya1  
d3w8ea\_ d2fmua1 d1x1ta\_ d1rpna\_ d3ay7a1 d1k2wa\_ d1eq2a\_ d2hrba1  
d3ruaa\_ d2ew8a1 d4hwka\_ d1xgka\_ d2bd0a1 d1yo6a1 d2a35a1 d2ntva\_  
d1vl8a\_ d1hdca\_ d4bkua\_ d2ag5a1 d2q45a\_ d1nffa\_ d4iy1a\_ d1zbqa1  
d1kewa\_ d1ek6a\_ d1ja9a\_ d2q46a2 d1iy8a\_ d1cyda\_ d2ptga\_ d1hxha\_  
d1uzma1 d3lyla\_ d4m89a\_ d3wyea\_ d2b1la1 d1w6ua\_ d1sb8a\_ d2q2va\_  
d4nr0a\_ d1e6wa\_ d2gasa\_ d3oiga1 d2bgka1 d1mxha\_ d1vl0a1 d1rkxa\_  
d1r6da\_ d1wmaa1 d1e7wa\_ d2c07a1 d1xkqa\_ d3tzha\_ d1g0oa\_ d3lz6a\_  
d1qyca\_ d1ledoa\_ d1gz6a\_ d1oc2a\_ d1t2aa\_ d1zema1 d2xoxa\_ d1z45a2  
d1geea\_ d1p33a\_ d3lt0a\_ d4e6pa\_ d2wyua\_ d1db3a\_ d4q9na\_ d1xhla\_  
d4o1ma\_ d1fmca\_ d2uvda\_ d2gdza1 d1uaya\_ d2z1ma\_ d2o23a2 d2fr1a2  
d2fr1a1 d1qsga\_ d1qyda\_ d4zjua\_ d2a4ka1 d1yb1a\_ d1wvga1 d1yxma1  
d3f4ba\_ d1mg5a\_ d1xg5a1 d1r55a1 d3gboa\_ d1kufa\_ d1buda\_ d4q1la\_  
d1quaa\_ d1yp1a\_ d1wnia\_ d2gfoa1 d1vjva\_ d2ayna1 d3nhea\_ d1qxp4  
d1ziva1 d1zcma1 d3ioqa\_ d1fh0a\_ d1o0ea\_ d1khqa\_ d1m6da\_ d2cb5a\_  
d1cs8a\_ g8pch.1 d1s4va\_ d2pnsa\_ d1vsna1 d1mira\_ d1iwda\_ d2oula\_  
d7pcka\_ d3bwka\_ d3bcna\_ d2p86a\_ d1pvja\_ d1pcia\_ d1gece\_ d1deua\_  
d4bs6a\_ d1xkga1 d1cqda\_ d1jqpa2 d2c0ya\_ d2bdza\_ d3p5ua\_ d2o36a\_



d1zoya1 d1qo8a2 d1d4ca2 d1chua2 d1jnra2 d2jk6a2 d2jk6a1 d1fecal  
d1fecal d1lpfa1 d1lpfa2 d1xhca1 d1xhca2 d1dxla2 d1dxla1 d1gera2  
d1m6ia2 d1onfa1 d1onfa2 d3lada2 d3lada1 d1w4xa1 d1w4xa2 d1gesa2  
d1mo9a1 d1xdia1 d1fl2a2 d1fl2a1 d1fcda1 d1fcda2 d1h6va2 d1h6va1  
d1mo9a2 d1gv4a2 d1gv4a1 d2gv8a2 d2gv8a1 d1aoga1 d1aoga2 d1hyua1  
d1ebda1 d1ebda2 d3dk9a1 d1q1ra2 d1q1ra1 d1gesa1 d1zbfal d2z1ha\_  
d2etja1 d3qioa1 d1j11a\_ d2e41a\_ d1j12a\_ d2lsna1 d1lio2a\_ d1uaxa\_  
d2yv0x\_ d1ekea\_ d1i39a\_ d1o94a2 d1lqta1 d1cjca1 d1s5ja1 d2hbja2  
d2igia\_ d1wlja\_ d1qhta1 d4dlea1 d1tgoa1 d2f96a1 d3tr8a1 d3mxma\_  
d1q8ia1 d1y97a1 d1w0ha\_ d1kfsa1 d2py5a1 d1d5aa1 d1yt3a3 d2guia\_  
d3mwpal d4kb1a\_ d1js9c\_ d1f15b\_ d1za7a\_ d1laja\_ d2v76a\_ d1wj1a1  
d1aqca\_ d1qqga2 d1qqga1 d1n3ha\_ d4dbba\_ d3f0wa1 d1p3ra\_ d1wgua1  
d2cy4a1 d3hqca\_ d1wvha1 d1xr0b1 d1v58a1 d1t3ba1 d4ilfa2 d4npba2  
d3nvva1 d1krha3 d2h88b1 d1n62a2 d1t3qa2 d1kf6b2 d1zoyb1 d1jq4a\_  
d1dgja2 d1rm6c2 d1r7ha\_ d1faaa\_ d1wika1 d1xfla\_ d1ttza1 d2f51a1  
d1ti3a\_ d1nhoa\_ d1sena\_ d2i4aa\_ d1ep7a\_ d1zmaa1 d1fo5a\_ d3lefa1  
d3diea1 d2yana1 d1z6na1 d1oaza\_ d3zywa1 d4aj8a\_ d1nm3a1 d4fiwa\_  
d1wmja\_ d4hs1a1 d1iloa\_ d1xwaa1 d1wjka1 d2vmla\_ d1fb6a\_ d1gh2a\_  
d1h75a\_ d1nw2a\_ d1kx5b\_ d3a6na\_ d4m6ba2 d2nqbd\_ d3wkjd\_ d2yfwe\_  
d4h9na\_ d5bnxa\_ d1kx5c\_ d3r45a\_ d1eqzb\_ d4jjnb\_ d1f66c\_ d1eqza\_  
d4wnnb\_ d1kx5a\_ d1u35c1 d2nqbc\_ d1kx5d\_ d1ku5a\_ d1f1ea\_ d1tafa\_  
d1bh9b\_ d1tafb\_ d1jfib\_ d1q9ca\_ d1h3ob\_ d2byka1 d4g92b\_ d1bh9a\_  
d1jfia\_ d1h3oa\_ d2bykb1 d1n1jb\_ d1pd212 d1nhya2 d2a2ra2 d1k0dd2  
d1f2ea2 d1gsua2 d1f3ba2 d2fhea2 d2pvqa1 d1tw9a2 d1oyja2 d1e6ba2  
d1k0ma2 d3ik7a1 d4is0a1 d1r5aa2 d1j1va2 d1m0ua2 d3gtub2 d1z9ha2  
d1okta2 d1axda2 d2gsra2 d1tu7a2 d1k3ya2 d1zgma1 d1b48a2 d1gnwa2  
d1gwca2 d2gsta2 d1glqa2 d1oe8a2 d1pn9a2 d1v2aa2 d1fw1a2 d1duga2  
d1ovna2 d1ig8a1 d1czan2 d1czan1 d1ig8a2 d1czan4 d1bg3a4 d1bg3a3  
d1bg3a2 d1bg3a1 d1nira1 d1qqya\_ d1gd6a\_ d1f6ra\_ d1ivma\_ d2gv0a\_  
d1iiza\_ d2z2fa\_ d1j8xa\_ d1ghla\_ d1b9oa\_ d1741a\_ d1691a\_ d2o4wa\_  
d1p37a\_ d1k28a3 d1xjta1 d1jtma\_ d2f2qa\_ d4e97a1 d1g4ma1 d2pjsa1  
d1klla\_ d2i7ra1 d1ecsa\_ d1xqaa1 d5cj3a1 d1jifa\_ d2p7oa\_ d1r9ca\_  
d1nkia\_ d1mpya2 d1kw3b2 d4ghga1 d1tfza1 d3isqa1 d3isqa2 d1sqia1  
d1sqia2 d1lkda2 d1lkda1 d1mpya1 d1cjxa2 d1cjxa1 d1sp9b2 d1t47a1  
d1t47a2 d1flua2 d1sp8a1 d1sp8a2 d1flua1 d1ro5a1 d1s5ja2 d1qhta2  
d4dlea2 d1tgoa2 d3py8a2 d1q8ia2 d2py5a2 d1d5aa2 d1qsta\_ d2beia1  
d4m3sa\_ d1u6ma1 d1ygha\_ d1yk3a1 d3dr6a\_ d1xmta\_ d1z4ea1 d2ge3a1  
d1bo4a\_ d2fiaa1 d2jdca1 d1y9wa1 d3to7a\_ d1wwza1 d2fl4a1 d2ozua1  
d2b5ga\_ d2cy2a1 d2p0wa\_ d1cm0a\_ d4pswa\_ d1yrea1 d1yr0a1 d1m4ia\_  
d2gana1 d1yvka1 d1ghea\_ d2g3aa1 d1y7ra1 d2euia1 d1q2ya\_ d2fsra1  
d1xeba\_ d2ae6a1 d1cjwa\_ d1qsma\_ d2aj6a1 d1y9ka1 d1i12a\_ d1vkca\_  
d2atra1 d1n71a\_ d2d4pa1 d2fiwa1 d2fe7a1 d1tiqa1 d2ou2a\_ d1yx0a1  
d2fcka1 d1p0ha\_ d2j8ma\_ d2pq8a\_ d1z4ra1 d1s3za1 d1ufha\_ d1xvqa1  
d1pn0a2 d3hy2a\_ d2cvba1 d1o8xa\_ d1lu4a\_ d1we0a1 d2bmxa1 d2a4va1

d1psqa\_ d1xiya1 d1q98a\_ d1n8ja\_ d1zofa1 d2ggta\_ d3tjja\_ d4jela1  
d1o73a\_ d3s9fa\_ d2zcta\_ d1qmva\_ d1jfua\_ d2b1ka\_ d5dvba1 d2b5xa1  
d2v2ga\_ d1st9a\_ d3tb2a\_ d411ra\_ d4fh8a1 d1e2ya\_ d1knga\_ d2h30a\_  
d1i5ga\_ d2z9sa\_ d2f8aa1 d1tp9a1 d2b7ka\_ d1nm3a2 d3hvvva\_ d2wfc1  
d4kcea\_ d1xvwa1 d4gqca1 d3qpma\_ d4k1fa\_ d1zzoa1 d1gp1a\_ d1prxa\_  
d4od7a1 d1z6ma1 d4mcua1 d4dvca1 d1r4wa\_ d3l9sa\_ d1un2a\_ d3rppa\_  
d2qked\_ d4ksoa\_ d1t4za1 d1lwja\_ d2m5ta\_ d1cqqa\_ d1wqsa\_ d5bpea\_  
d2ipha\_ d1lvoa\_ d2bhga1 d3tnta\_ d3sjia\_ d3d23a1 d2fyqa\_ d3tloa\_  
d3zvea1 d3q3ya1 d4asha1 d1cg2a1 d1yloa2 d1y7ea2 d1y0ya3 d1l1fwa1  
d1vixa1 d1fnoa4 d1vhoo2 d1ysja1 d1vhea2 d1z2la1 d2fvga2 d1vgya1  
d1r3na1 d2grea2 d1xmba1 g1q71.1 d1ofda3 d1ea0a3 d1ecfa2 d1q15a2  
d1ct9a2 d1ao0a2 d1te5a\_ d1ysl1x\_ d4hs9a\_ d1ispa\_ d1ex9a\_ d1ku0a\_  
d3qmma\_ d1lgya\_ d4l3wa\_ d1gz7a\_ d1lukca\_ d1cr6a2 d3groa\_ d1thta\_  
d1ei9a\_ d1ra6a\_ d3gsza\_ d1khva\_ d1te9a\_ d2xwha\_ d3uqsa\_ d3hkwa\_  
d3n6ma\_ d2cjqa\_ d2xyma\_ d1teba\_ d1te8a\_ d1s48a\_ d1u09a1 d4wfxa\_  
d3tyqa\_ d2pgga1 d3zxha\_ d1cgla\_ d1rm8a\_ d1leaka2 d1hy7a\_ d2jsda\_  
d1cxva\_ d1hv5a\_ d1i76a\_ d3p0ya1 d1igra1 d1igra2 d1n8yc2 d1n8yc1  
d1m6ba2 d1m6ba1 d4dv8a2 d1jx4a2 d3gv5b1 d1t94a2 d3bq0a2 d1ohfc\_  
d2tbvc\_ d1c8nc\_ d1x36a\_ d1smvc\_ d1ng0c\_ d4sbvc\_ d1f2nc\_ d1cixa\_  
d1y29a\_ d1v7fa\_ d2jtba\_ d1d1ha\_ d1g9pa\_ d1lupa\_ d1qk7a\_ d1mb6a\_  
d2a2va\_ d1niya\_ d1i25a\_ d2mpqa\_ d1ie6a\_ d1kqha\_ d1la4a\_ d2mxoa1  
d1d10a\_ d1koza\_ d1qk6a\_ d1emxa\_ d1lqra\_ d1c6wa\_ d1rmka\_ d1eyoa\_  
d1cnaa\_ d1fu3a\_ d1g1pa\_ d1f3ka\_ d1fyga\_ d1rypd\_ d1irua\_ d1rypc\_  
d3unfk\_ d1rypa\_ d1j2pa\_ d1irui\_ d3unfh\_ d1m4ya\_ d1rypb\_ d1irul\_  
d1irug\_ d1iru2\_ d1q5rh\_ d1rypg\_ d1g3ka\_ d1iruf\_ d1q5qa\_ d1e94a\_  
d1irub\_ d1ryph\_ d3ty6a\_ d1iruj\_ d1iruk\_ d1rype\_ d1irud\_ d1irue\_  
d3mi01\_ d1rypf\_ d1iruh\_ d2z3ba\_ d1iruc\_ d3mka2\_ d1irul\_ d1ny721  
d1ny722 d1a6ca3 d1a6ca2 d1a6ca1 d1pgl22 d1pgl21 d1pgl11 d1ny711  
d1mqta\_ d1d4m3\_ d1fmd3\_ d2mev1\_ g1aym.1 d1ev13\_ d4q4w1\_ d1r1a3\_  
d2x5ia\_ d1rhi1\_ g1r1a.1 g1d4m.1 g1rhi.1 d1b35b\_ d1loopa\_ d1tme1\_  
d4iv1a\_ g1pvc.1 g1fpn.1 d1fpn1\_ d4gb31\_ d1d4m1\_ d1fmd1\_ d1ev11\_  
d2wzr3\_ d1qqp3\_ g1fmd.1 d2x5ic\_ d1rhi3\_ g1oop.1 d1hxs1\_ g1hxs.1  
d1fpn3\_ d1bev1\_ g2mev.1 d1eah3\_ d1aym1\_ d1pvc3\_ d1qqp1\_ d1zba3\_  
d1h8ta\_ d3vbhc\_ g1b35.1 g1bev.1 d1hxs3\_ g1ev1.1 d1bev3\_ g1tmf.1  
d1tmf1\_ d1b35a\_ d2mev3\_ g1eah.1 g1h8t.1 d1eah1\_ d4q4w3\_ d1r1a1\_  
d1aym3\_ d1pvc1\_ d1zba1\_ d1h8tc\_ d1loopc\_ d1tme3\_ g1qqp.1 d4iv1c\_  
g1tme.1 d3ubub\_ d1legia\_ d1v7pa\_ d1tdqb\_ d3ubua\_ d1c3ab\_ d1h8ua\_  
d3bx4b\_ d1t8ca1 d1sb2a1 d1qdda\_ d2ziba1 d3cada\_ d1byfa\_ d1j34b\_  
d1jwia\_ d1jzna\_ d1c3aa\_ d1oz7b\_ d1wmza\_ d3bdwb\_ d1hq8a\_ d1fifa1  
d1dv8a\_ d3hupa\_ d1wk1a1 d1umra\_ d2afpa\_ d3bx4a\_ d1gz2a\_ d1sl6a\_  
d1v7pb\_ d3g8ka\_ d1ixxa\_ d1j34a\_ d1jwib\_ d1g1sa1 d1y17a1 d1ja3a\_  
d1fvub\_ d3bdwa\_ d1sb2b1 d1fvua\_ d1umrc\_ d1oz7a\_ d4m17a\_ d3cfwa1  
d1ypqa1 d1g1ta1 d3fd4a\_ d3l9jc\_ d4dn8a1 d1v41b\_ d1rdl1\_ d2msba\_  
d4w9ta\_ d4x2ra1 d1ka9f\_ d1qo2a\_ d4axka1 d1thfd\_ d1h5ya\_ d4u28a\_

d2y88a\_ d4wd0a\_ d1vzwa1 d1eixa\_ d3exra\_ d2ffca1 d2fdsa1 d3n3ma1  
d2czda\_ d1q6oa\_ d2yyua\_ d1vqta1 d1dbta\_ d3ldva1 d2flia1 d1rpxa\_  
d1tqja\_ d1tqxa\_ d41t9a1 d3tc7a1 d3hoja\_ d1i4na\_ d3vnda\_ d3n18a1  
d1geqa\_ d3naval d1v5xa\_ d4a2ra1 d3tc6a1 d1ujpa\_ d4ijba\_ d1xcfa\_  
d1vc4a\_ d1rd5a\_ d1qopa\_ d3b5va\_ d2r80b\_ d1cqxa1 d1cg5a\_ d1gcvb\_  
d3boma\_ d2h8fb\_ d2raoa\_ d3bj1a\_ d4hrrb\_ d2r50a\_ d3d1kb\_ d2aa1b1  
d3zhwa\_ d3hf4b\_ d3gdja\_ d1jebb\_ d3bj1b\_ d1x9fb\_ d1wmub\_ d1gcvb\_  
d3bcqb\_ d3d4xb\_ d1gvha1 d2dc3a\_ d3hf4a\_ d4yu3a\_ d3k8ba\_ d1qpwb\_  
d2r80a\_ d3bcqa\_ d1v4wa\_ d3wtgb\_ d1j17a\_ d4esaa\_ d1a9we\_ d3d1ab\_  
d4h21a\_ d1v4wb\_ d1mwca\_ d1vhba\_ d1jeba\_ d1spgb\_ d1h97a\_ d1q1fa\_  
d1tu9a1 d3d1aa\_ d1hdsb\_ d3hyub\_ d2zfb\_ d3fs4a\_ d1oj6a\_ d1shrb\_  
d4h21b\_ d4yu3b\_ d1spga\_ d3hrwa\_ d3qqra\_ d3at5a\_ d4wchd\_ d3hyua\_  
d1cg5b\_ d1uc3a\_ d1hbra\_ d2raob\_ d1outb\_ d4esab\_ d3gdjb\_ d3qqqa\_  
d1x9fc\_ d3vrfa\_ d1litha\_ d3mkba\_ d3d4xa\_ d3mjpa\_ d1j16a\_ d3fh9a\_  
d1outa\_ d2dc3b\_ d1it2a\_ d3eoka\_ d3g46a\_ d1qpwa\_ d3vrfb\_ d1ch4a\_  
d1x9fd\_ d1hdsa\_ d2zfa\_ d3mkbb\_ d1or4a\_ d3wtga\_ d1a4fa\_ d3fh9b\_  
d3bomb\_ d3cy5a\_ d3at5b\_ d1x9fa\_ d2oifa\_ d4lmb\_ d1cpcb\_ d3v57a\_  
d1kn1a\_ d1cpca\_ d4f0ta\_ d2vjha\_ d4po5b\_ d1eyxa\_ d1alla\_ d4f0tb\_  
d1b33b\_ d1b8db\_ d4h0mb\_ d1b33a\_ d2vjhb\_ d4lmb\_ d2vmlb\_ d1allb\_  
d2vjta\_ d3dbja\_ d2vmla\_ d2vjtb\_ d4f0ub\_ d1f99b\_ d4rmpa1 d1liaa\_  
d1eyxb\_ d2uulb\_ d4lmsb\_ d4f0ua\_ d2bv8a\_ d1f99a\_ d2bv8b\_ d2c71b\_  
d3dbjb\_ d4rmpb1 d1b8da\_ d4h0ma\_ d3v57b\_ d1liab\_ d2uula\_ d2j96a\_  
d1pjqa1 g1wh1.1 d2xqfa\_ d1ea5a\_ d1f6wa\_ d1dx4a\_ d1qe3a\_ d1k4ya\_  
d4qwwa\_ d2ha2a\_ d1r88a\_ d1sfra\_ d4qeka\_ d1rpma\_ d2shpa1 d1yfoa\_  
d118ka\_ d2ooqa1 d1g4us2 d1p15a\_ d1lara2 d1lara1 d1wcha\_ d2fh7a2  
d2fh7a1 d2h0ba\_ d2erfa\_ d1h30a2 d1h30a1 d3mw4a1 d2r1ba\_ d3v64a1  
d1d2sa\_ d3bopa1 d3mw3a1 d1okqa1 d1okqa2 d1jmx4 d1pbya3 d1pbya4  
d4iuua3 d4bvva\_ d5hpga\_ d3k65a\_ d1ki0a3 d1ki0a2 d1ki0a1 d1pmla\_  
d3sp8a3 d2feba1 d1gvfa\_ d3qm3a1 d2fjka\_ d3l21a\_ d2e1da\_ d1to3a1  
d1w3ia\_ d1sfla\_ d1n7ka\_ d1vcva1 d4imeaa\_ d1wa3a\_ d2ocza1 d1f2ja\_  
d3m16a\_ d2yxga\_ d1ub3a\_ d3a5fa\_ d1fbaa\_ d1l6wa\_ d1xfba1 d1wx0a1  
d1vpxa1 d1ojxa\_ d1mxsa\_ d2a4aa1 d1xkya1 d3cq0a1 d3s1xa\_ d1f05a\_  
d1fdja\_ d3cpa1 d4d2ja\_ d1l6ja5 d1l6ja4 d1eaka4 d1eaka3 d1l6ja3  
d1h8pa2 d1h8pa1 d3rp2a\_ g1lucy.1 d1fuja\_ d2zchp\_ d3w94a\_ d1si5h\_  
d1lo6a\_ g2pka.1 d1cgha\_ d1kigh\_ d1a5ia\_ d3s9ba\_ d1hj8a\_ d1ao5a\_  
d2anya\_ d1q3xa1 d1gvza\_ d1azza\_ d4gsoa\_ d2f91a1 d1iaua\_ d1gdna\_  
d1eufa\_ g1fiw.1 d1eq9a\_ d4nfea\_ d2rdla\_ d1spja\_ d1elva1 d1a7sa\_  
d1ekbb\_ d1pfxc\_ d1yc0a\_ d2aiqa\_ g1fiz.1 d1fi8a\_ d4k60a\_ d4dgja\_  
d1mzaa\_ d1op0a\_ d3tjva\_ d1pytd\_ d1sgfg\_ g1gg6.1 d2eeka\_ g1rtf.1  
d1a0ja\_ d3g01a\_ d1pytc\_ d4e7na\_ d1ddja\_ d1z8ga1 d2hlca\_ d1npma\_  
d1brup\_ g1jou.1 d1sgfa\_ d1autc\_ g2hnt.1 g1kdq.1 d3s69a\_ d4crga\_  
d1fxya\_ d1bqya\_ d2ftba\_ d1pmpa\_ d2rcqa1 d1fdqa\_ d4lkpa\_ d1sa8a\_  
d1vyfa\_ d1lpja\_ d3vg7a1 d4azqa1 d1o8va\_ d5bvqa\_ d1p6pa\_ d2qo4a\_  
d1opba\_ d1yiva1 d1o1va\_ d4bvma1 d4tkba\_ d4i3ba\_ d1bwya\_ d1ggla\_

d4gkca\_ d1cbia\_ d3p6da1 d1kqwa\_ d2a0aa1 d1m4la\_ d2bk7a\_ d3fjua\_  
d1z5ra1 d1kwma1 d1uwya2 d1jqga1 d2c1ca1 d1h8la2 d3lgia\_ d3i77a\_  
d2z9ia2 d4nsva\_ d1lcya2 d4jcna\_ d1agja\_ d1os8a\_ d1p3ca\_ d1l1ja\_  
d1qtfa\_ d1e69a\_ d1mv5a\_ d3g60a4 g1ii8.1 d1ewqa2 d1ji0a\_ d1qhla\_  
d1v43a3 d2wmfa1 d1vpla\_ d1g2912 d4a82a2 g1f2t.1 d2d62a1 d3tuic1  
d2bbsa1 d3g60a3 d2ixea\_ d1g6ha\_ d1sgwa1 d2qi9c\_ d3rlfa1 d3b60a1  
d3d31a2 d2pzea1 g1xew.1 d1jj7a\_ d1oxxk2 d2onka1 d1wlwa\_ d1iwea\_  
d1qf5a\_ d1vmaa2 d1nija1 d1np6a\_ d2p67a1 d3ihla\_ d1okkd2 d1ls1a2  
d1s1ma2 d1liona\_ d2v40a\_ d1dj3a\_ d3hida\_ d2vola1 d2g0ta1 d1vcoa2  
d1j8mf2 d1g3qa\_ d1xjca\_ d1p9ba\_ d1qzxa3 d1ihua2 d1ihua1 d2qm8a\_  
d1dj2a\_ d4ioja\_ d1cp2a\_ d1yrba2 d3gqba2 d1xp8a1 d1tf7a2 d1tf7a1  
d1ye8a1 d1skyb3 d2qe7d2 d4blta\_ d4huta\_ d3ldaa2 d4hyya\_ d2i3ba1  
d1crla\_ d3j9tb2 d3ntua2 d1vdza1 d2z43a\_ d1e9ra\_ d1nlfa\_ d3ziaa2  
d1n0wa\_ d1g6oa\_ d3ziad2 d3j9ta2 d1pzna2 d3gqbb2 d2i49a\_ d1nnfa\_  
d1xvxa\_ d1ursa\_ d1h3da1 d1iuda\_ d4m1va1 d1twya\_ d3e13x\_ d2nxoa1  
d4pfua\_ d3ttma\_ d1elja\_ d2qmw1 d1us5a\_ d1y3na1 d1jeta\_ d1uqwa\_  
d4f19a1 d2esna2 d3thia\_ d3fasa1 d2uyeb\_ d2xwva1 d1r9la\_ d2fyia1  
d1pb7a\_ d2ozza1 d1sw5a\_ d1nh8a1 d1vr5a1 d2g29a\_ d1xs5a\_ d3lswa\_  
d2z23a\_ d3w9va\_ d3tcha\_ d1q35a\_ d1z7me1 d3q27a\_ d1p99a\_ d1ve4a1  
d2i6ea1 d4mcoa1 d4n8ya\_ d1eu8a\_ d1zba1 d1hsla\_ d1lixca2 d1j1na\_  
d1xvya\_ d1y9ua\_ d2z22a1 d1xoca1 d4oera\_ d1wdna\_ d5f1qa1 d1xt8a1  
d1i6aa\_ d4gwoa\_ d4igta1 d1pc3a\_ d4mmpa1 d1o63a\_ d2czla1 d2onsa2  
d4mija1 d4ok5a1 d2bmfa1 d2bmfa2 d1yksa1 d1yksa2 d1jr6a\_ d2qeqa1  
d2j1qa1 d1a1va2 d1eh3a\_ d3skpa\_ d1dtza2 d1ieja\_ d1jnfa2 d1ce2a1  
d1jnfa1 d1b1xa2 d1b1xa1 d1jw1a1 d1jw1a2 d1ryoa\_ d1h76a1 d1h76a2  
d1etha2 d1w52x1 d2ppla1 d1hpla2 d1lpbb2 d2oxea1 d1bu8a2 d1rp1a2  
d1c4oa1 d2p6ra3 d2p6ra4 d1oywa2 d1oywa3 d1wrba1 d1w36b2 d1w36b1  
d1c4oa2 d3bora\_ d1t6na\_ d2eyqa5 d2eyqa3 d2eyqa2 d2zu6a2 d1veca\_  
d1uaaa1 d1w36d1 d2g9na1 d1z3ix2 d2rb4a\_ d1hv8a1 d1hv8a2 d1t5ia\_  
d1w36c2 d2j0sa2 d2j0sa1 d1fuka\_ d3hjha1 d1z5za1 d1qdea\_ d1z63a1  
d1s2ma2 d1s2ma1 d1wp9a1 d1wp9a2 d1gm5a3 d1gm5a4 d3dina4 d3dina3  
d1q0ua\_ d1w36c1 d1z3ix1 d1nkta4 d1uaaa2 d1w36d2 g1qhh.1 d2fwra2  
d2fwra1 d3q3ma\_ d1za0a1 d1mxra\_ d2inca\_ d1jk0a\_ d2incb\_ d1mhyb\_  
d3hf1b\_ d1mtyb\_ d1r2fa\_ d2uw1a\_ d1mhyd\_ d3n37a\_ d1afra\_ d1oquc\_  
d1syya\_ d2o1za\_ d1uzra\_ d1smsa\_ d2fkza\_ d1zuja1 d1s3qa1 d2fjca1  
d1z6om1 d1veia\_ d4dyya\_ d1jiga\_ d3gvya\_ d2pyba\_ d4cy9a1 d3bvfa1  
d1r03a\_ d2cf7a\_ d1nf4a\_ d1zs3a1 d4iwka\_ d3ka8a\_ d3np0x\_ d1n1qa\_  
d1lb3a\_ d4e6ka\_ d1z6oa1 d2fzfa1 d4dyua\_ d3ge4a\_ d1jgca\_ d4am4a\_  
d2z6ma\_ d1ji5a\_ d1vlga\_ d1lkoa1 d1krqa\_ d3qz3a\_ d1o9ra\_ d2ffxj\_  
d1euma\_ d1yv1a1 d2v2pa\_ d1j30a\_ d4di0a\_ d1dpsa\_ d1oewa\_ d2qzxa\_  
d2asia\_ d1psoe\_ d1miqa\_ d1smra\_ d2h6ta\_ d1pfza\_ d1lizda\_ d3hd8a\_  
d1j71a\_ d1dpja\_ d4aa9a\_ d1t6ex\_ g1b5f.1 g1lya.1 g1htr.1 d1qdma2  
d1bxoa\_ d1wkra\_ d1tzsa\_ d1libqa\_ d2qzwa\_ d1ex4a2 d1c6va\_ d1bdqa\_  
d3ggta\_ d3ixoa\_ d1mrxa\_ d2haha\_ d1tw7a\_ d4njsa\_ d1sgua\_ d2p3da\_

d1nsoa\_ d3d3ta\_ d2rkfa\_ d1c6ya\_ d2rspa\_ d3ogpa\_ d3ekwa\_ d2o4na\_  
d2j9ja\_ d1baia\_ d3ggua\_ d3lzua\_ d4npua\_ d4j55a\_ d2r8na\_ d2fxda\_  
d2p3ca\_ d4dqea\_ d3ttpa\_ d3t3ca\_ d2p3aa\_ d2hc0a\_ d2fdda\_ d3mwsa\_  
d1um8a\_ d1lixza\_ d1qvra2 d1qvra3 d1qzma\_ d1sxjc2 d1jr3d2 d2p65a\_  
d1l8qa2 d1g8pa\_ d3hu3a3 d1sxjd2 d1njfa\_ d1in4a2 d1sxja2 d1tuea1  
d2ce7a2 d1w5sa2 d1sxjb2 d1d2na\_ d1ny5a2 d2gnoa2 d2a5yb3 d1fnna2  
d1u0ja1 d1lv7a\_ d1iqpa2 d2fnaa2 d1ixsb2 d4gita\_ d1sxje2 d1g41a\_  
d1k8rb\_ d1wgra1 d1ef5a\_ d1wfy1 d1e8ya3 d1wgya1 d1l1fda\_ d2cs4a1  
d1wxma1 d2byea1 d3kh0a1 d2byfa1 d1wxaa1 d1e7ua3 d4yl8a1 d2a16a3  
d1wgda1 d1wga1 d4q5eb\_ d1wjna1 d1se9a\_ d3n3kb\_ d1wz0a1 d1we6a1  
d2m0xa\_ d2gbka\_ d3rt3b1 d1wh3a1 d1sifa\_ d2ekek2 d4ii2b1 d4hk2a1  
d1c3ta\_ d1m94a\_ d1wgha1 d1ttna1 d1wx8a1 d3v6cb1 d2ma9b\_ d4i6lb1  
d1bt0a\_ d2jvca1 d1iyfa\_ d2k1fa\_ d1wxva1 d1wf9a1 d1t0ya\_ d2io0b2  
d1x1ma1 d2gbma\_ d1zw7a1 d2m17a\_ d1ud7a\_ d1we7a1 d2l1wpa\_ d2gbja\_  
d1wjua1 d1v6ea1 d1v86a1 d4eewa\_ d1wiaa1 d4icva\_ d4gu2a\_ d1wx7a1  
d1wy8a1 d4hjka1 d2faza1 d1v5oa1 d4lu0a\_ d3unda1 d3e9aa1 d1vr6a2  
d1n8fa\_ d2qkfa\_ d1d9ea\_ d1o60a\_ d1pn0a1 d1ju2a1 d2f5va1 d3c96a1  
d2gmha1 d1pj5a2 d1gpea1 d1o5wa1 d1n4wa1 d1k0ia1 d2dw4a2 d2ivda1  
d1seza1 d2voua1 d1kdga1 d1wioa4 d1ccza2 d1vcaa1 d1ic1a1 d2d9qb1  
d2nxyb2 d1adqa1 d1fnga1 d1uvqb1 d1zs8a1 d2vola1 d2vola2 d1mfb12  
d2jelh2 d1uwel2 d3qq4b1 d1kjbv\_ d1k5na1 d1osph2 d4odh12 d1ow0a1  
d1ow0a2 d1bfob2 d3l9ra2 d3jtth1 d2fath2 d4elkb2 d1fn4b2 d2xfxb\_  
d1pg7x2 d1cqka\_ d4k71b2 d1lk2a1 d1eapb2 d4lfhg2 d1i4fa1 d2nw2a2  
d1kfah2 d1mhca1 d1h3ua1 d1wejh2 d1h0db2 d1a5fh2 d1kcvh2 d1mjuh2  
d1qqda1 d1kcrh2 d1k8ia1 d3huja2 d2nnab1 d1nfd2 d3mffb2 d1s9va1  
d1lk3h2 d1q0xl2 d1fv1b1 d1neza1 d4rfeb2 d1r3ha1 d1a6tb2 d1kjva1  
d1pz5b2 d1onqa1 d2bc4a2 d1de4a1 d1k8da1 d1tcra2 d1dn0b2 d1nfd2  
d2xwtb2 d1bfoa2 d1mexh2 d1iakb1 d1ypzf2 d4f7ea2 d1q72l2 d2fbjh2  
d1fe8h2 d1clzh2 d1fngb1 d1uvqa1 d1vgka1 d1c16a1 d4j12a2 d4x99b2  
d1igtb3 d1je6a1 d1q72h2 d1nldh2 d1teth2 d2hmic2 d1i1ca2 d1i1ca1  
d1k8ib1 d1q0yh2 d1kfa12 d3frua1 d1pg7w2 d1u58a1 d1igyb4 d1igyb3  
d1hyrc1 d1klub1 d1deeb2 d1c12b2 d2bc4b2 d2ig2h2 d1kcv12 d3wn5b1  
d1lk2b\_ d1lk3l2 d1mjul2 d1sm3h2 d1q0xh2 d1zvsa1 d1ydp1 d1u8ib2  
d1ypze2 d1kcuh2 d1svpa\_ d1mbma\_ d3su6a1 d1cula1 d4agka\_ d1vcpa\_  
d1q31a\_ g1n11.1 d3e90b\_ d1ep5a\_ d3u1jb\_ d2e3fa\_ d1mm0a\_ d2e3ea\_  
d2l1da\_ d2ny8x\_ d2e3ga\_ d2ny9x\_ d2nz3a\_ d2l1j7a\_ d1n4na\_ d2m8bb1  
d2kyqa\_ d3psma\_ d1jkza\_ d1jxca\_ d2g11a\_ d1ugla\_ d4uj0a\_ d2k4ua\_  
d1hp2a\_ d2lu9a\_ d1baha\_ d2meoa1 d1wm7a\_ d1hlya\_ d1n8ma\_ d1wpda\_  
d1c55a\_ d1pvza\_ d1wt7a\_ d1rjia\_ d1wz5a\_ d1m2sa\_ d1pjva\_ d1c49a\_  
d1qkya\_ d2ktca1 d1wmta\_ d1du9a\_ d1j5ja\_ d1rlga\_ d1t0za\_ d2i61a\_  
d1t1ta\_ d1sn4a\_ d1kv0a\_ d2lkba\_ d1npia\_ d1wwna\_ d1pe4a\_ d2kbka\_  
d2li7a\_ d1djta\_ d2kbha\_ d1dq7a\_ d1sega\_ d1omya\_ d1zywa1 d1jzaa\_  
d1n9wa1 d1bbua1 d1e1oa1 d1c0aa1 d1b8aa1 d3a74a1 d1eova1 d1t61c1  
d1iyjb4 d1iyjb5 d1iyjb3 d1o7ia\_ d4ipca1 d1x3ea\_ d4apva\_ d1jb7a1

d1jb7a2 d1jb7a3 d3kdfa\_ dlue1b\_ dlwjja1 d3eiva\_ dlxjva2 dlxjva1  
d2ccza2 dlse8a\_ d1lloc\_ dljb7b\_ dlqvca\_ d3ulla\_ dlqzga\_ dlmiua4  
dlmiua5 dlmiua3 d3g48a1 dlgd7a\_ dlmkha\_ dljjcb3 dlpyba\_ dly14b1  
d2nn6i1 dli94l\_ d2zjra2 dlsmxa\_ d2qamc2 dlhh2p1 d2r7da1 d1rl2a2  
dlwfqa1 d3bzka4 dlx6oa2 d3a0ja\_ d2j01d2 d2ja9a1 d4q15a\_ dlhr0w\_  
dl1uza\_ d2n3sa\_ d2vnud1 dlh95a\_ dlgo3e1 d2nn6h1 dlne3a\_ d2mola\_  
dliz6a2 dljjga\_ d1e3pa2 d2ix0a3 d2ix0a2 d2lxja\_ dlueba3 dlueba2  
d2z0sa1 d1u0la1 d2ix0a1 d2eifa2 d2je6i1 d3i2za1 d2c35b1 d2ahob2  
d1t9ha1 d3i4oa\_ d2qall1 dljt8a\_ d2nn6g1 dlg6pa\_ d3cama\_ dli94q\_  
d1c9oa\_ d1d7qa\_ d2ba0a1 d2vnud2 d2vnud3 dlkhia2 d2qalq1 dlwi5a1  
d1xtda2 dlny4a\_ d1dzka\_ d4tlja\_ d2a2ua\_ d4wfva\_ d3t1da\_ d4iaxa\_  
d3zq3a\_ d2nnda\_ dli4ua\_ dlkxo\_ dlbbpa\_ dlkt7a\_ dlaksa\_ d3s26a1  
d1lf7a\_ dlqfta\_ d4gh7a\_ dlz24a1 dlqabe\_ dlxkia\_ d3bx7a\_ d4iawa1  
d1n0sa\_ dlqkab\_ d3kzaa\_ d2k23a\_ d2l9ca1 d2joza1 dlgm6a\_ d3kffa\_  
d3saoa1 d1e5pa\_ d1yupa1 dl1iua\_ d2a1ka\_ dlje5a\_ dlohea1 dlohea2  
d2f4da\_ d1rxda\_ d2hxpa\_ dlxria\_ dl5ra2 d1fpza\_ d3ezza\_ d4y2ea\_  
d3azya\_ d3wvja\_ dlupsa1 d1ajoa\_ d2hyka\_ d1ajka\_ d2vy0a\_ dlo4ya\_  
d3o5sa\_ d3d6ea\_ d3atga\_ dl1dypa\_ dlumza\_ d3i4ia\_ dl1c1la\_ d4lbqa\_  
d1a78a\_ dl1slta\_ d4no4a\_ d3zsja\_ d3duia\_ dl1s3a\_ dlqmja\_ dlhlca\_  
d1tdha3 dlq3ba3 d1ee8a3 dlk82a3 g1qmo.1 g1len.1 d3zyra\_ dlfnya\_  
d1n47a\_ g2ltn.1 dlavba\_ d3usua\_ dl1dhkb\_ dl1f9ka\_ dlukga\_ dl1g8wa\_  
dl1g9fa\_ dl1wbfa\_ d3wcsa\_ dl1g7ya\_ g1loe.1 dl1mvqa\_ dl1hq1a\_ dl1v6ia\_  
dl1dbna\_ dl1qnwa\_ dl1fx5a\_ d4l8qa\_ d3n35a\_ d3ubra\_ dl1qo8a1 dl1d4ca1  
d2k3va\_ dl1ft5a\_ dl1qdba\_ dl1mlqa\_ d2j7aa\_ dl1h21a\_ dl1ogyb\_ d4fasa\_  
dl1jnia\_ dl1oaha\_ dl1sp3a\_ dl1eysc\_ d3h33a\_ dl1rwja\_ dl19hca\_ dl1os6a\_  
d3bxua\_ d3h4na\_ dl1i77a\_ d3caoa\_ d2ctha\_ dl1duwa\_ dl1ofwa\_ d2e84a\_  
dl1hh5a\_ dl1gyoa\_ d3h34a\_ dl1dszb\_ dl1a6ya\_ d3cbba\_ dl1ynwa1 dl1r4ia\_  
dl1hcqa\_ d2hana\_ d2hanb\_ d2enval dl1kb4b\_ d2n11b\_ dl1lola\_ dl1cita\_  
d2dara2 d2dara1 dl1wyha2 d2dloa2 dl1rutx4 dl1rutx3 d2cuqa2 dl1x4la2  
dl1x4la1 dl1x3ha2 dl1x3ha1 d2d8za1 dl1x61a2 dl1x6aa1 dl1x6aa2 d2cora2  
d2cora1 dl1v6ga1 dl1v6ga2 d2d8za2 dl1x64a1 dl1x64a2 dl1b8ta1 d2co8a1  
dl1x63a2 d2dj7a2 d2dj7a1 d2cu8a2 d2cu8a1 dl1g47a2 dl1g47a1 dl1j2oa1  
dl1wyha1 d2dloa1 dl1wiga1 dl1wiga2 d2cupa2 d2cupa3 dl1x68a1 d2d8ya2  
d2d8ya1 dl1m3va2 dl1x62a1 dl1x68a2 dl1x61a1 dl1b8ta3 dl1b8ta2 d2d8xa2  
d2d8xa1 dl1x4ka1 dl1x4ka2 d2cuqa1 dl1m3va1 d2co8a2 dl1j2oa2 dl1x63a1  
d2cura1 d2cura2 dl1x62a2 dl1op9a\_ dl1y0la1 dl1etzb1 dl1legj11 d2gsib1  
dl1nj9a1 d4jfhdl dl1aqk11 dl1t2ja\_ dl1lo4h1 dl1zvya1 d3v4v11 d4enec1  
dl1kxtb\_ d5e8ea1 d2pxya\_ d4weud\_ dl1xiwc\_ d2esvd1 dl1qznh\_ dl1ogae1  
dl1f4xh1 d4n1hb\_ d3ezjb1 d3mlw11 dl1kfah1 dl1etza1 dl1b4jh1 d3cfic\_  
d4w68a\_ d2arja1 dl1ek3a\_ d2ok0l1 dl1vera\_ dl1uwgh1 dl1blnb1 dl1fpth1  
dl1rzga1 d2giya1 d4m3kb1 dl1nc2a1 d2nyyd1 dl1ncna\_ dl1fbih1 d5dxwa\_  
d4fqqa1 dl1dqdh1 dl1jfq11 dl1kelh1 dl1faih1 dl1frg11 dl1fig11 d4m6n11  
dl1fo0a\_ d4hxb11 d3b5ga\_ d3quyd1 d2h9gb1 dl1i8kb\_ d2dd8h1 d2ck0h1  
dl1eaja\_ d4w6wb1 d2a6ib3 dl1t66d1 d2e27h\_ dl1ob1b1 dl1f11b1 d2v7na1

d1ad0a1 d2xt1b1 d1pskh1 d4i13b1 d2op4l1 d1a0q11 d1uwel1 d1za3a1  
d1ncbl1 d4uu9a\_ d1bm3h1 d1cloh1 d1nqba2 d1cf8h1 d4y5va\_ d1mhph1  
d5anma1 d4cdgc1 d4ldeb\_ d1y0lb1 d2pcpb1 d1z3gl1 d1dfbl1 d1fh5h1  
d3g5xa1 d1tzib1 d4dn3l1 d3zhka1 d2b1hh1 d2uyla1 d1f3dh1 d1nj9b1  
d2agjh1 d2h1pl1 d1q72h1 d8fabb1 d1ndmb1 d1rjca1 d4u6hb1 d3upca\_  
d2fbj11 d1osph1 d1tvda\_ d2cjev\_ d4fhbd1 d1bd2d1 d1rz7h1 d3nn8a\_  
d1blna1 d1knoa1 d1nfda1 d2bmkb1 d1dq11\_ d1igyb1 d1igfl1 d12e8h1  
d3utza1 d1nc2b1 d1rihh1 d4mwfb1 d4jvpa1 d1mieh1 d1rhfa1 d1fgn11  
d1sbs1 d1lp9e1 d1dn0a1 d4lqf11 d1iaih1 d1kgcd1 d1mh5b1 d1gpol1  
d2g60h3 d1f8t11 d2jixd1 d4grwh\_ d1fo0b\_ d1bfob1 d1axsa1 d1u9ka\_  
d1nmbh\_ d1h8na1 d1h8na2 d1jguh1 d4eura1 d3sdy11 d35c8h1 d1w72l1  
d1mvub\_ d1i9rh1 d1ob1a1 d4wenb\_ d1yeeh1 d3ietc1 d1f58h1 d1ad0b1  
d1mqk1\_ d1nbvh1 d4b50a\_ d3r8bb\_ d1baf11 d1mamh1 d4rgne1 d2gsgb\_  
d35c8l1 d1bafh1 d1ai1h1 d2pcpa1 d2fath1 d2x1pa\_ d1orsb1 d1ibgl1  
d1shma\_ d1a2yb\_ d1u0qa\_ d2coqa\_ d1hilb1 d1qfwi\_ d1jv5b\_ d1fn4b1  
d5e0qa\_ d1nsnh1 d1plgl1 d4ocxl1 d1kb5h1 d1rzfh1 d1pg7x1 d2fx7h1  
d2oi9c\_ d1l7il1 d3eyva1 d1d5il1 d4ffyl\_ d1tet11 d1a6wh\_ d1ac6a\_  
d3dvfa\_ d1nfde1 d1mimh1 d1ri8a1 d1jhlh\_ d3dura\_ d1fskb1 d1f97a1  
d3so3b1 d2ak4d1 d1lp9f1 d4z7wf1 d1l7th1 d4y5ya\_ d4x7ec1 d1emth1  
d1ikf11 d1nlbh1 d4utal1 d1bjma1 d1eapb1 d1u6ah1 d2dtgd1 d1kj2b\_  
d1xeda1 d1cleh1 d1fgvh\_ d2bnub1 d2fb4h1 d2dtgb1 d1ktrh\_ d1jpth1  
d1qkz11 d4hepg\_ d2atpb1 d1flrh1 d2hrpl1 d1mvfa\_ d1iaim1 d3k80a1  
d2jb5h1 d3zkxc\_ d4grwe\_ d1it9h1 d1rhhb1 d3w9ec\_ d1e4wh1 d1sy6h1  
d2j6eh1 d3qxta\_ d1jglh1 d1p7ka1 d1tzhb1 d4n8pa1 d1gaf11 d2jelh1  
d1wioa2 d4i0cc1 d1cicb1 d1lmka2 d1lmka1 d1iqwh1 d1lorqb1 d1ejoh1  
d1jnlh1 d4zgl1\_ d43c9b\_ d1ggbl1 d1wejh1 d3q6fa1 d1f3dj1 d3c6la1  
d1bqlh1 d3p9wb\_ d1a3r11 d1h0db1 d2uzil\_ d1eo8l1 d1qfwl\_ d1n7ml1  
d1igja1 d1c5ch1 d2a9mh\_ d1fj1b1 d4heme\_ d1ccza1 d1a5fh1 d1logad1  
d1dlfh\_ d1qa9b\_ d1vgel1 d3qskb\_ d1sjxa\_ d4ozfg1 d1sq2n\_ d1qd0a\_  
d1kcvh1 d1c5db1 d3qcull d8faba1 d3bn9d1 d1mjuh1 d4y8dc\_ d7fabh1  
d3dvgb1 d1l00l1 d1a6tb1 d1gigh1 d1kcrh1 d2hwz11 d1yjdc1 d3clfl1  
d4krna\_ d1dl7l\_ d1e6ol1 d1mexh1 d3r0ma\_ d4kkna\_ d1fns11 d1loaqh\_  
d1rzia1 d1ucbh1 d1ncw11 d4b41a\_ d1nfd1 d2mpah1 d2d7t11 d4grwf\_  
d4b5ea\_ d1lk3h1 d3u79a\_ d4u3xa\_ d1ghf11 d1bvkb\_ d1mcww1 d1b88a\_  
d1jrhh1 d32c2b1 d4wemb\_ d1dsfh\_ d1op3h1 d1ce1l1 d1iqda1 d1qoka1  
d1qoka2 d1qfuh1 d2crya1 d1ay1h1 d1oaql\_ d3ab0b\_ d1rurl1 d1t4kb1  
d1bz7b1 d1n0xh1 d1for11 d1ucbl1 d4w6yb\_ d43c9a\_ d2aab11 d1tzia1  
d4n1ca\_ d1k6qh1 d3g9ab\_ d4tvsa1 d1ligmh\_ d1pz5b1 d3dx9a1 d3wxwh\_  
d1nakh1 d1kcull d3eaka\_ d4qlra1 d1cr9l1 d1d9ka\_ d1f4xl1 d1deea1  
d2i27n2 d1c12a1 d2orb11 d1j8hd1 d1mcp1 d1c5da1 d1kenh1 d1bd2e1  
d1h5ba\_ d4x7fc1 d3upaa\_ d1t3fa1 d1indh1 d2dtgc1 d4hc1l1 d1zv5a1  
d4wgvb\_ d1uwgl1 d4f37k1 d1aqkh1 d1vesa\_ d3zkqd\_ d1fpt11 d1lo4l1  
d1knob1 d3rrqa\_ d1ct8b1 d4orz\_ d1mlbb1 d4hgkc1 d1dqdl1 d1bogb1  
d4ozhe1 d1dr9a1 d1i7za1 d1dn0b1 d1kell1 d1rzib1 d1ypzf1 d1wtla\_

d1hkfa\_ d1fail1 d1figh1 d2vyre\_ d1sjva\_ d1ohqa\_ d1bfoa1 d1pkqb1  
d1mjul1 d1b4jl1 d1nsl1 d2arjb1 d1p4bh\_ d4aj0a\_ d3nn8b\_ d2rcja1  
d1f2xk\_ d4v1dd\_ d1adqh1 d2eksa\_ d4k3ga\_ d1jfqh1 d1uweh1 d1frgh1  
d4gftb\_ d1uz8b1 d4n1ea\_ d1bm3l1 d1clol1 d3mcka1 d2vq1a1 d1ae6h1  
d4aq1b1 d1uj3b1 d1nbqa1 d1fh5l1 d2ck0l1 d2ywza\_ d1q72l1 d4nxbx\_  
d1hila1 d4hz1b1 d2j88l1 d1zmya1 d1cd0a\_ d1a4ka1 d1pskl1 d1a0qh1  
d4krmb\_ d1ncbh1 d2fbjh1 d1j8he1 d1i3ua\_ d1cf8l1 d1fe8h1 d2p1ya1  
d1eeqa\_ d2x89a\_ d1ol0a\_ d2r0lh1 d1ub5a1 d1dfbh1 d3eyvb1 d4jdvb1  
d4p2cg\_ d2gsia1 d2agjl1 d1u3ha1 d2h1ph1 d1rihl1 d1fskc1 d1boga1  
d2a77l1 d1ospl1 d1qfoa\_ d3dwta\_ d2fx7l1 d1rz7l1 d3stba1 d1pkqa1  
d1b6da1 d1dzba2 d1dzba1 d1kj2a\_ d4l1ha\_ d1rzgb1 d1dq1h\_ d12e8l1  
d1miel1 d1jmaa\_ d1sbsl1 d1fgnh1 d1f58l1 d1mqkh\_ d1ndgb1 d3qegl1  
d1iail1 d2aw2a1 d1tqbc1 d3fo2a1 d4dkaa\_ d1f8th1 d2g60l1 d2ywy\_  
d1uj3a1 d1yc7a\_ d3bd3a\_ d4w6xb1 d1nmb1\_ d1i8ka\_ d1rjlb1 d1ypze1  
d1p7kb1 d1kxqe\_ d1gpoh1 d2z4qa1 d1w72h1 d1i9rl1 d4qgya1 d4xt1c\_  
d2qqnh1 d1cical d3c08h1 d2cd0a\_ d2bdnh1 d1hnga1 d1mam1 d1nldh1  
d1cr9h1 d4lcih1 d3bkyh1 d3qg7l1 d1ai1l1 d1kxvc\_ d4iosd\_ d1l7ih1  
d2x1qa\_ d1ub6b1 d3k74b\_ d1libgh1 d1teth1 d1igya1 d1hxma1 d2x6ma\_  
d2e7la\_ d5e03a\_ d1qfwm\_ d2r0kh1 d1igjb1 d1rurh1 d1plgh1 d1mj8h1  
d1yuhb1 d3fmg1 d1rzfl1 d1emtl1 d1ad9b1 d1igtb1 d1nlbl1 d1d5ih1  
d3k7ua\_ d4ffyh\_ d1bwwa\_ d3dvga1 d1a6ta1 d1fgvl\_ d4qxgl1 d1mim1  
d1jh1l\_ d2hffb1 d2hh0l1 d1qkzh1 d1l7tl1 d1afvh1 d1iaii1 d2cjuh\_  
d1um5h1 d2ghwb2 d2ghwb1 d1kgce1 d2fgwh1 d1ikfh1 d1dvfd\_ d2i24n1  
d2xtjb\_ d1za3b1 d2yc1a\_ d2hh0h1 d2x1oa\_ d1bvka\_ d1rjla1 d5e7ba1  
d1igta1 d1il1b1 d2fb4l1 d1mvua\_ d1jptl1 d32c2a1 d1fvca\_ d1iqdb1  
d2hrph1 d2p4ab\_ d4qo1a\_ d1p2cb1 d1wt5c\_ d1t4ka1 d5c1mb\_ d1it9l1  
d1bz7a1 d1b2wh1 d1e4wl1 d1jnl1 d1yedb1 d1za6b1 d3u7aa\_ d1igfh1  
d3gnm1 d1orsa1 d1wejl1 d1a2ya\_ d1hxmb1 d1gafh1 d2j4wh1 d1pz5a1  
d1j05a\_ d1a3rh1 d4fq1l1 d1qfwh\_ d1eo8h1 d1n7mh1 d4s11a\_ d1kegh1  
d5da4a\_ d1iqwl1 d3whxb1 d1vgeh1 d1deeb1 d1c12b1 d1t2ql1 d1ad9a1  
d3gsnb1 d3b2uc1 d1ggbh1 d1t3fb1 d1nakl1 d4ocmc\_ d1lila1 d2v7hb3  
d2esve1 d1mcoh1 d2qr0b1 d2q3aa\_ d1ct8a1 d1kcr1 d2pxyb\_ d2uzih\_  
d5c3ld\_ d3durb\_ d1c5cl1 d2ak4e1 d1d17h\_ d1xiwd\_ d1mlba1 d1rmfl1  
d1i7zb1 d1dlfl\_ d2xa3a\_ d5bq7b1 d1dqqb1 d3h42l1 d1legjh1 d1kcvl1  
d1fe8l1 d2j6el1 d1f3rb2 d1lk3l1 d1sm3h1 d1q0xh1 d1ghfh1 d7fabl1  
d1igch1 d1lo0h1 d4idla\_ d5c2bl\_ d1jrh1 d1lila1 d3zhda1 d4kfzc\_  
d1b0wa\_ d1e6oh1 d1mexl1 d4krpb\_ d1fnsh1 d1ncwh1 d4hgma\_ d4eigb1  
d4rzca\_ d2mpal1 d4y5xa\_ d5en2b1 d3lrga1 d4ej1c1 d1rha1 d1j05b\_  
d1forh1 d1q9wb1 d2wzpd\_ d2aq2a1 d1h0da1 d3revb1 d2ij0c1 d1tzh1  
d4m7jl1 d1k6ql1 d3b9kc1 d1igml\_ d3qeu1 d1dsfl\_ d1celh1 d1kcuh1  
d1zvha1 d1zvoa1 d1tqbb1 d1ay1l1 d2qsc1 d2cgrh1 d1n10h1 d1ken1  
d3eo0a1 d4n9ob1 d1n0xl1 d3k1kc\_ d2aq2b1 d1ck1a1 d1enfa1 d1i4pa1  
d1v1oa1 d1et9a1 d1esfa1 d2g9hd1 d4ohja1 d1klud1 d1bxta1 d1eu3a1  
d1ty0a1 d1fnua1 d2cqva1 d1fhga\_ d2k1ma\_ d1biha3 d1biha1 d1biha4



d3qp3a1 d1g1ca\_ d1gxea\_ d1cvsc2 d1cvsc1 d1xmwa2 d1m4ka2 d2otpa2  
d1biha2 d1rhfa2 d2fcba2 d2fcba1 d1wwbx\_ d1gsma2 d1lepfa1 d1lepfa2  
d2dava1 d1waaa\_ d1f97a2 d1x44a1 d1vcaa2 d1fnla2 d1fnla1 d3b5ha2  
d3h8na2 d3h8na1 d1jbja1 d1jbja2 d1pd6a\_ d1f2qa2 d1f2qa1 d3cx2a\_  
d1nbqa2 d3b5ha1 d1n26a1 d1xiwb\_ d1xaua\_ d1fltx\_ d2ifga1 d1olla1  
d1olla2 d1cs6a4 d1cs6a3 d1cs6a2 d1cs6a1 d2gw5a2 d1sy6a1 d1xiwa\_  
d1lucta2 d1lucta1 d1ry7b2 d1gl4b\_ d1qz1a3 d1olza1 d2c9aa1 d1wwca\_

**Family-47 (c.1.8.4)**

**Positive dataset contains 11 protein sequences.**

d3wdpp1 d3wq5a\_ d4gxpa\_ d4hz8a\_ d3aiua\_ d1wcga1 d3ahxa\_ d1v02a\_  
d2dgaa\_ d1vffa1 d4ha4a\_

**Negative dataset contains 3897 protein sequences.**

d1m32a\_ d1libja\_ d1c7na\_ d1iuga\_ d4q75a\_ d2bkwa1 d1t3ia\_ d1n8pa\_  
d1qz9a\_ d1jff9a\_ d1p3wa\_ d3kgwa\_ d1c11a\_ d2ctza1 d1vjoa\_ d2rfva\_  
d1gc0a\_ d1cs1a\_ d1d2fa\_ d2ch1a1 d1qgna\_ d1pffa\_ d1elua\_ d1u08a\_  
d1lc5a\_ d2ay1a\_ d1bw0a\_ d3pd6a\_ d7aata\_ d2csta\_ d1j32a\_ d1fg7a\_  
d4wlha\_ d1o4sa\_ d1v2da\_ d1gdea\_ d1m6sa\_ d1v72a1 d1svva\_ d1ajsa\_  
d1wsta1 d2f8ja2 d1lk9a\_ d1vp4a1 d1xi9a1 d2gb3a1 d1yaaa\_ d2bnma2  
d3rcha\_ d3k40a\_ d1pmma\_ d2cfba1 d1dfoa\_ d1o69a\_ d1bj4a\_ d3k28a\_  
d2bwpa\_ d3lg0a\_ d2fnua\_ d3ou5a\_ d1z7da1 d1b9ha\_ d1iaya\_ d4msoa\_  
d1bs0a\_ d1s0aa\_ d1sffa\_ d3tqxa\_ d1mdoa\_ d3qboa\_ d3pgya\_ d1bjna\_  
d2dkja\_ d1ejia\_ d1vefa1 d4wxga\_ d3bs8a\_ d3gbxa1 d1w23a\_ d1e57b\_  
d1auyb\_ d1fwxa1 d1libya\_ d1f56a\_ d1bypa\_ d1azca\_ d1ws8a\_ d3u25a\_  
d1cuoa\_ d1lid2a\_ d1rkra\_ d2iaac\_ d4dplx\_ d1nwpa\_ d2gima\_ d2i7sa\_  
d1qhqa\_ d3ehbb1 d1fftb1 d1gyca3 d1hfua2 d1kbva1 d1kbva2 d1sdda1  
d1sdda2 d1gyca1 d1mzya1 d2bw4a1 d1aoza1 d1aoza3 d1aoza2 d1kyaa2  
d1kyaa3 d1kyaa1 d1mzya2 d4e9sa1 d1sddb1 d1sddb2 d1hfua1 d1hfua3  
d1oela2 d1oela1 d1v10a2 d1v10a3 d1v10a1 d1a3qa1 d1iknc\_ d3brda1  
d1p7h11 d1oy3c\_ d1imhc1 d1gjia1 d1zk9a1 d2cxka1 d2bema\_ d1pama1  
d1lea9c1 d1qhoa1 d2fhfa2 d2fhfa1 d1k3ia1 d1j0ha1 d1csla1 d2bhua1  
d1ledqa1 d1f1sa2 d1ut9a2 d1gvia1 d1txka1 d4alac\_ d1pjwa\_ d1rera1  
d1s6na\_ d3uzqb\_ d2phla1 d1fxza2 d1fxza1 d1lrha\_ d1uija1 gldgw.1  
d2v09a\_ d1uika2 d1uika1 d1dgwa\_ d1nepa\_ d1ktja\_ d1ds6b\_ d1fstb\_  
d1ex0a1 d1g0da1 d1ju8a\_ d4mh8a\_ d1mu2a2 d4i7ga1 d2b5ea2 d2b5ea3  
d2b5ea1 d2b5ea4 d2kp1a1 d2kp2a1 d1hyua3 d1hyua4 d1j08a2 d3nvva1  
d1krha3 d2h88b1 d1n62a2 d1t3qa2 d1kf6b2 d1zoyb1 d1jq4a\_ d1ffva2  
d1dgja2 d1rm6c2 d2bjca1 d2hsga1 d1qpza1 d1efaa1 d1ydw2 d2nvwa2  
d1h6da2 d1zh8a2 d1qkia2 d1xeea2 d1t1ta2 d1r0ka3 d1vkoa2 d1vm6a2  
d3qvsa2 d1gr0a2 d1p1ja2 d2ovga\_ d1sq8a\_ d1rzsa\_ d3kz3a\_ d3orca\_  
d3gpdg2 d2q49a2 d1hdgo2 d2g17a2 d2cvoa2 d2czca1 d3pwka2 d1obfo2  
d1i32a2 d1zyao2 d2pkqo2 d1b7go2 d2hjsa2 d1cf2o2 d1vkna2 d1nvmb2  
d1ux8a\_ d1dlya\_ d4i0va\_ d2bkma\_ d1dlwa\_ d2bmma\_ d2msya\_ d2djoa1  
d2r5za\_ d1au7a1 d1f43a\_ d2lmda1 d1akhb\_ d1s7ea1 d3nara\_ d1zq3p1  
d2craa1 d1mija\_ d4uuta\_ d3a01a\_ d1x58a1 d3rkqa1 d3cmya1 d2cqxa1

d2da6a1 d1e3oc1 d1fj1a\_ d1mh3a1 d1ig7a\_ d1x41a1 d1wh7a1 d1gt0c1  
d2mw8a\_ d1lfup\_ d1x2ma1 d1b72a\_ d1wi3a1 d1wjha1 d1x2na1 d1mnmc\_  
d2cuea1 d3k2aa\_ d2hosa\_ d2jwta2 d1pufa\_ d1octc1 d2hi3a\_ d1b8ia\_  
d4j19a\_ d3lnqa\_ d1wh5a1 d1b8ib\_ d1fexa\_ d2cqra1 d1guua\_ d1ug2a1  
d2cqqal d2ajea1 d4a69c\_ d2crgal d2iw5b1 d1xc5a1 d1ofcx1 d2cu7a1  
d1wgxa1 d2cjja1 d2ckxa1 d1gvda\_ d1bl0a1 d1bl0a2 d1d5ya1 d3lv8a\_  
d1s3ga1 d1zakal d1s4qa\_ d3tvta2 d1uf9a\_ d1khta\_ d1ckea\_ d1losna\_  
d1p5zb\_ d4tmka\_ d3cm0a\_ d1jaga\_ d3h86a\_ d1t0hb\_ d1nn5a\_ d2h92a\_  
d3kb2a1 d2c95a1 d1yj5a2 d1kgda\_ d1ly1a\_ d2ak3a1 d1vyva2 d1deka\_  
d2grja1 d1p3ja1 d1y63a\_ d1e4ya1 d1s96a\_ d3iija1 d1lvga\_ d1nksa\_  
d1vyua2 d4e22a\_ d1qf9a\_ d1jjva\_ d1q3ta\_ d1ki9a\_ d1lw7a2 d1teva\_  
d1kjwa2 d1gsia\_ d1g3ma\_ d1j99a\_ d1t8ta1 d1nsta\_ d1fmja\_ d1zrha\_  
d1ls6a\_ d2a3ra\_ d1aqua\_ d2zptx\_ d3ckla\_ d1texa\_ d1q44a\_ d2gwha\_  
d1odfa\_ d1uj2a\_ d4gi7a\_ d2jaoa1 d1rz3a\_ d1k6ma1 d1z0ja1 d3umra2  
d3gj0a1 d2gaoa1 d1yzga1 d1x3sa1 d1g7sa4 d1puja\_ d1udxa2 d1kk1a3  
d2o52a\_ d1jwyb\_ d1zcaa2 d1zcba2 d2fv8a1 d2cjwa\_ d3dz8a1 d1xzpa2  
d1vg8a\_ d4qxaa\_ d2ew1a1 d1x1ra1 d2bcgy\_ d3doea1 d3cona\_ d3rega\_  
d3wyga\_ d1upta\_ d2b6ha1 d1zd9a1 d1lnza2 d1r5ba3 d1n0ua2 d1r2qa\_  
d2f91a1 d2rhda\_ d3q3jb\_ d3q85a\_ d1efma1 d1r8qa\_ d2gf9a1 d2akab1  
d1ek0a\_ d1z08a1 d2gcoa1 d2dy1a2 d4g01b\_ d2cxxa1 d1svia\_ d3q72a\_  
d1ni3a1 d4ac9a4 d2erxa1 d2bmea\_ d1wxqa1 d2gf0a1 d4ldja1 d1zunb3  
d1d5ca\_ d4lv5b\_ d1efca3 d1kmqa\_ d2g6ba1 d3lrpa\_ d1tada2 d2y8ea\_  
d4rd4a1 d1z06a1 d2heia\_ d3a58b\_ d1u01a2 d1d2ea3 d1zj6a1 d2ocba\_  
d3rwoa\_ d1mr3f\_ d2e9sa1 d4u5xa1 d2iwra\_ d2fn4a1 d3bwdd\_ d2nzja1  
d2atva1 d2ksqa\_ d3l43a\_ d1mkya2 d1mkya1 d1wmsa\_ d1jnja3 d2rmka\_  
d1f6ba\_ d1f60a3 d1gota2 d1jala1 d2fh5b1 d1g16a\_ d2wblc\_ d1m7ba\_  
d1wf3a1 d1f5na2 d1t9ha2 d1z6xa1 d1z0aa1 d2fg5a1 d2a5ja1 d2bcjq2  
d1s0ua3 d1ky3a\_ d4y0va\_ d4lhwa\_ d2qmea1 d2atxa1 dlegaa1 d1ryha\_  
d1moza\_ d1nrjb\_ d2erya1 d3bfka\_ d1puia\_ d1fzqa\_ d3j3az1 d3t5ga\_  
d1shza2 d3defa\_ d2f7sa1 d3raba\_ d3tsoa\_ d3aq4a\_ d2a17a1 d3sfva1  
d3bc1a\_ d2ncda\_ d1sdma\_ d3h4sa1 d2heha\_ d2grya\_ g3kin.1 d1kk8a2  
d1br2a2 d1goja\_ d1f9va\_ d2mysa2 d1lkxa\_ d3t0qa\_ d4db1a1 d3gbja\_  
d1ry6a\_ d1v8ka\_ d1kv9a1 d1k8ka2 d1k8ka1 d3uleb1 d3i33a2 d3i33a1  
d1bupa1 d1dkgd2 d1dkgd1 d4ci6a2 d1jcfa1 d4a2ba2 d2fxua1 d1yaga2  
d4cbua2 d1bupa2 d3vrda1 d3vrda2 d1fcdc2 d1fcdc1 d1h1oa2 d1h1oa1  
d1m70a1 d1liqca2 d1liqca1 d1eb7a2 d1eb7a1 d1nmla2 d3h1jd1 d1hroa\_  
d4gedb\_ d3zooa\_ d1mz4a\_ d1gu2a\_ d1f1fa\_ d1dvva\_ d1c6ra\_ d1c75a\_  
d1e29a\_ d1gdva\_ d1cnoa\_ d1h32b\_ d1co6a\_ d2bh4x\_ d2aiua\_ d5cytr\_  
d1jdlal d1i8oa\_ d2zboa\_ d3dmia\_ d1ls9a\_ d1wvec\_ d2yk3a\_ d3ph2b\_  
d1dw0a\_ d5aura\_ d1ql3a\_ d1qn2a\_ d1f1ca\_ d4zzva\_ d2xspa\_ d1eg1a\_  
d4v20a\_ d1ojja\_ d4ipma1 d1gpia\_ d4csia\_ d3pfza\_ d2yoka\_ d2nqya\_  
d1h4ga\_ d1hixa\_ d1oa2a\_ d1olra\_ d3b7ma\_ d4h7ma1 d3wp3a\_ d2vgda\_  
d1ligoa\_ d3zsea\_ d2nlra\_ d3wx5a\_ d1oa3a\_ d1pvxa\_ d1f5ja\_ d1oa4a\_  
d1ks5a\_ d4ix1a1 d1h32a1 d3i2ka1 d1lnsa3 d1mpxa2 d1evsa\_ d1pvhb\_

d1z7ca\_ d1huwa\_ d1bgea\_ d1rhga\_ d1f6fa\_ d1f45b\_ d1i1rb\_ d1axia\_  
d1etea\_ d3tgxb\_ d1scfa\_ d2z3qa1 d3qb1a\_ d1hula\_ d1m48a\_ d4nkqb\_  
d1eera\_ d1v7mv\_ d5e4ea\_ d2o27a\_ d3b5ka\_ d2psma1 d4zf7a\_ d3uf5a\_  
d4x51a\_ d1d9ca\_ d4ypgc1 d3oq3a\_ d1lqsl\_ d1n1fa\_ d1au1a\_ d1wu3i\_  
d3bes1\_ d3ux9a\_ d4dnxa2 d1m8pa2 d1v47a2 d1g8fa2 d1x6va2 d3rbaa\_  
d2qtra\_ d1nupa\_ d3l92a\_ d1f9aa\_ d1qjca\_ d2h29a\_ d1vlha\_ d1lw7a1  
d1mrza2 d4ruka\_ d2e17a\_ d1liq0a2 d1irxa2 d1r6ta2 d1livsa4 d2cyba\_  
d1rqga2 d2yxna\_ d1f7ua2 d1h3fa1 d1ffya3 d2g36a1 d1nzja\_ d1jila\_  
d1n3la\_ d1i6la\_ d1pfva2 d1h3na3 d3n9ia\_ d3sz3a1 d3sw2a\_ d1moxc\_  
d1dx5i3 d1edmb\_ d1aut12 d1aut11 d1nqlb\_ d1dva11 d1szba2 d1kigl\_  
d2y5f1\_ d1ijqa2 d1gk5a\_ d1g1sa2 d1nt0a3 d1xdtr\_ d1lmja2 d1lmja1  
d1nzia2 d2wphe\_ d1klil\_ d1pfx12 d1pfx11 d1p9ja\_ d1g1ta2 d1f7ea\_  
d4yzub\_ d1m1xb5 d2y5ia\_ d1qlsa\_ d1psra\_ d3n22a\_ d2egda\_ d4ggfc\_  
d2wcea\_ d2luca\_ d4aqia\_ d3nsia\_ d2lp3a\_ d1j55a\_ d1a4pa\_ d1k8ua\_  
d1nsha\_ d1pvaa\_ d3fs7a\_ d2pvba\_ d1ttxa\_ d1rwy\_ d2kyfa\_ d1rk9a\_  
d1a75a\_ d1exra\_ d1tiza1 d1nyaa\_ d1g8ia\_ d1ggwa\_ d1wdcc\_ d3fwba\_  
d1ggza\_ d2o5ga\_ d1ctaa\_ d1m45a\_ d3i5gc\_ d1sl8a\_ d1fpwa\_ d2scpa\_  
d2roaa\_ d4aqra\_ d3pn7b\_ d1br1b\_ d2mysb\_ d1s6ca\_ d1bjfa\_ d2obha\_  
d1jfka\_ d1jf0a\_ d1qv0a\_ d1lkja\_ d2mlfc\_ d2m97a\_ d2d8na\_ d4by5a\_  
d1jbaa\_ d4nqga\_ d1wdcb\_ d2mysc\_ d1j7qa\_ d1s6ia\_ d1uhka2 d1r2ua\_  
d1dtla\_ d3kf9a\_ d3pn7c\_ d1gjya\_ d1y1xa\_ d1hqva\_ d1dvia\_ d1df0a1  
d4usla\_ d1k94a\_ d1etob\_ d1umqa\_ d1mixa2 d1e5wa2 d1j19a2 d2a16b2  
d1g4ma1 d1g4ma2 d1lid1a\_ d2hmta\_ d1b9ra\_ d1offa\_ d1frra\_ d3wcqa\_  
d1e9ma\_ d1l15pa\_ d1wria\_ d1i7ha\_ d3av8a\_ d1czpa\_ d1rfka\_ d3p1ma1  
d3b2ga\_ d2bt6a2 d1wgqa1 d1v89a1 d2coda1 d1zc3b\_ d1wg7a1 d1u5ea1  
d1v61a1 d2coca1 d2ys1a1 d1v5pa1 d1ntya2 d1wjma1 d1wila1 d1u29a\_  
d1xx0a1 d1unqa\_ d2zkmx3 d1fhoa\_ d1v88a1 d2adza1 d1x1fa1 d1p6sa\_  
d2coaa1 d1btka\_ d1v5ma1 d1faoa\_ d2x18a\_ d1dyna\_ d1x1ga1 d4kaxb\_  
d2j59m1 d1ki1b2 d1xcga2 d1txda2 d1u5da1 d1dbha2 d1wlha\_ d1upqa\_  
d1v5ua1 d1foea2 d2fjla1 d1eaza\_ d2dfka2 d2cofa1 d1kz7a2 d91dta1  
d2ewda3 d1up7a1 d2dfda1 d1s6ya1 d1vjta1 d7mdha1 d1hyea1 d1t2da1  
d1ojsa3 d1b8pa1 d1ldna1 d1hyha1 d1civa1 d2a92a1 d1ez4a1 d1i0za1  
d1y6ja1 d1gv0a1 d1ur5a1 d1ll1da1 d1obba1 d1v8ba1 d1gdha1 d2dlda1  
d1mx3a1 d1ygya1 d1qp8a1 d1li4a1 d1j4aa1 d2naca1 d1npya1 d3t4ea2  
d1a4ia1 d1o0sa1 d2hk9a2 d2egga2 d1b26a1 d1bvua1 d1gq2a1 d1c1da1  
d1gtma1 d1euza1 d1nvtal d3dona2 d1ledza1 d1gpja2 d1vi2a1 d1p77a1  
d1nyta1 d1b0aa1 d1v16a1 d1v91a1 d1txga2 d3f47a1 d1mv8a2 d2pv7a2  
d1xc2a3 d2ahra2 d4xiya1 d2f1ka2 d1pgja2 d1i36a2 d1np3a2 d1lj8a4  
d1teaa3 d1qmga2 d2i76a2 d2g5ca2 d1wdka3 d1dlja2 d3cuma3 d1kola2  
d1f8fa2 d1qora2 d1jqba2 d1vj0a2 d1cdoa2 d1gu7a2 d1d1ta2 d1xa0a2  
d2dm6a2 d1jvba2 d1llua2 d1h2ba2 d1tt7a2 d1piwa2 d1o89a2 d1iz0a2  
d1e3ja2 d1yb5a2 d1uufa2 d1vj1a2 d1e3ia2 d3gpdg1 d1vc2a1 d2nwa1  
d1u8fo1 d1ydwa1 d1hdgo1 d2g17a1 d1cf2o1 d2czca2 d1r0ka2 d1obfo1  
d2cvoa1 d1ebfa1 d1h6da1 d1i32a1 d1zh8a1 d2q49a1 d1qkia1 d1j5pa4

d3pzra1 d1xeaa1 d1vkoa1 d1vm6a3 d3qvsa1 d2pkqo1 d1b7go1 d1gr0a1  
d1p1ja1 d1lc0a1 d1j0xo1 d3pwka1 d2hjsa1 d1zyao1 d1vkna1 d1t1ta1  
d1nvmbl d3sjua\_ d3ojfa1 d1xu9a1 d2jjya1 d1n7ha\_ d1y1pa1 d1h5qa\_  
d1jtv\_ d4fs3a\_ d2bkaa1 d1gy8a\_ d2c5aa1 d1ulsa\_ d1ooea\_ d2b69a1  
d1y5ma1 d1spxa\_ d1aela\_ d1bxka\_ d1ydea1 d1gega\_ d1hdoa\_ d1o5ia\_  
d1e6ua\_ d1snya1 d2rhca\_ d3zv4a\_ d5ceja\_ d2d1ya1 d1fjha\_ d3w8ea\_  
d2fmua1 d1x1ta\_ d1rpna\_ d3ay7a1 d1k2wa\_ d1eq2a\_ d2hrba1 d3ruaa\_  
d2ew8a1 d4hwka\_ d1xgka\_ d2bd0a1 d1yo6a1 d2a35a1 d2ntva\_ d1vl8a\_  
d1hdca\_ d4bkua\_ d2ag5a1 d2q45a\_ d1nffa\_ d4iy1a\_ d1zbqa1 d1kewa\_  
d1ek6a\_ d1ja9a\_ d2q46a2 d1iy8a\_ d1cyda\_ d2ptga\_ d1hxha\_ d1uzma1  
d3lyla\_ d4m89a\_ d3wyea\_ d2b1la1 d1w6ua\_ d1sb8a\_ d2q2va\_ d4nr0a\_  
d1e6wa\_ d2gasa\_ d3oiga1 d2bgka1 d1mxha\_ d1vl0a1 d1rkxa\_ d1r6da\_  
d1wmaa1 d1e7wa\_ d2c07a1 d1xkqa\_ d3tzha\_ d1g0oa\_ d3lz6a\_ d1qyca\_  
d1ledoa\_ d1gz6a\_ d1oc2a\_ d1t2aa\_ d1zema1 d2xoxa\_ d1z45a2 d1geea\_  
d1p33a\_ d3lt0a\_ d4e6pa\_ d2wyua\_ d1db3a\_ d4q9na\_ d1xhla\_ d4o1ma\_  
d1fmca\_ d2uvda\_ d2gdza1 d1uaya\_ d2z1ma\_ d2o23a2 d2fr1a2 d2fr1a1  
d1qsga\_ d1qyda\_ d4zjua\_ d2a4ka1 d1yb1a\_ d1wvga1 d1yxma1 d3f4ba\_  
d1mg5a\_ d1xg5a1 d1r55a1 d3gboa\_ d1atla\_ d1buda\_ d4q1la\_ d1quaa\_  
d1yp1a\_ d1wnia\_ d4ekfa\_ d2ckga\_ d1th0a\_ d2bkra\_ d3u1ra1 d1kapp2  
d1k7ia2 d3ioqa\_ d1fh0a\_ d1o0ea\_ d1m6da\_ d2cb5a\_ d1cs8a\_ g8pch.1  
d1s4va\_ d2pnsa\_ d1vsna1 d1mira\_ d1iwda\_ d2oula\_ d7pcka\_ d3bwka\_  
d3bcna\_ d2p86a\_ d1pvja\_ d1pcia\_ d1gece\_ d1deua\_ d4bs6a\_ d1xkga1  
d1cqda\_ d1jqpa2 d2c0ya\_ d2bdza\_ d3p5ua\_ d2o36a\_ d1zoya1 d1qo8a2  
d1d4ca2 d1chua2 d1jnra2 d1kf6a2 d2jk6a2 d2jk6a1 d1feca1 d1feca2  
d1lpfa1 d1lpfa2 d1xhca1 d1xhca2 d1dsla2 d1dsla1 d1gera2 d1m6ia2  
d1onfa1 d3lada2 d3lada1 d1w4xa1 d1w4xa2 d1gesa2 d1mo9a1 d1xdia1  
d1f12a2 d1f12a1 d1fcda1 d1fcda2 d1h6va2 d1h6va1 d1mo9a2 d1gv4a2  
d1gv4a1 d2gv8a2 d2gv8a1 d1aoga1 d1aoga2 d1hyua1 d1ebda1 d1ebda2  
d3dk9a1 d1q1ra2 d1q1ra1 d1gesa1 d1zbf1a1 d2z1ha\_ d2etja1 d3qioa1  
d1j11a\_ d2e41a\_ d1j12a\_ d2lsna1 d1io2a\_ d1uaxa\_ d2yv0x\_ d1mu2a1  
d1ekea\_ d1i39a\_ d1ps9a2 d1lqta1 d1cjca1 d1reoa1 d1ju2a1 d2f5va1  
d3c96a1 d2gmha1 d1pj5a2 d1gpea1 d1o5wa1 d1n4wa1 d1k0ia1 d2dw4a2  
d2ivda1 d1seza1 d2voua1 d1kdga1 d1xl4a1 d3vsqa\_ d2gixa1 d1p7ba1  
d1js9c\_ d1f15b\_ d1za7a\_ d1laja\_ d1ix2a\_ d1jmx4 d1jmx3 d1pbya3  
d1jmx1 d1pbya1 d1pbya2 d1faaa\_ d1wika1 d1xfla\_ d1ttza1 d2f51a1  
d1ti3a\_ d1nhoa\_ d1sena\_ d2i4aa\_ d1ep7a\_ d1zmaa1 d1fo5a\_ d3lefa1  
d3diea1 d2yana1 d1z6na1 d1oaza\_ d3zywa1 d4aj8a\_ d1nm3a1 d4fiwa\_  
d1wmja\_ d4hs1a1 d1iloa\_ d1xwaa1 d1wjka1 d2vmla\_ d1fb6a\_ d1gh2a\_  
d1h75a\_ d1nw2a\_ d1kx5b\_ d3a6na\_ d4m6ba2 d2nqbd\_ d3wkjd\_ d2yfwe\_  
d4h9na\_ d5bnxa\_ d1kx5c\_ d3r45a\_ d1eqzb\_ d4jjnb\_ d1f66c\_ d1eqza\_  
d4wnnb\_ d1kx5a\_ d1u35c1 d1id3a\_ d2nqbc\_ d1kx5d\_ d1tafa\_ d1bh9b\_  
d1tafb\_ d1jf1b\_ d1h3ob\_ d2byka1 d1n1ja\_ d4g92b\_ d1bh9a\_ d1jfia\_  
d1h3oa\_ d2bykb1 d1n1jb\_ d1pd212 d1nhya2 d2a2ra2 d1k0dd2 d1f2ea2  
d1gsua2 d1f3ba2 d2fhea2 d2pvqa1 d1tw9a2 d1oyja2 d1e6ba2 d1k0ma2

d3ik7a1 d4is0a1 d1r5aa2 d1jlva2 d1m0ua2 d3gtub2 d1z9ha2 d1okta2  
d1axda2 d2gsra2 d1tu7a2 d1k3ya2 d1zgma1 d1b48a2 d1gnwa2 d1gwca2  
d2gsta2 d1glqa2 d1oe8a2 d1pn9a2 d1v2aa2 d1fw1a2 d1duga2 d1g7ea\_  
d2trcp\_ d1ig8a1 d1czan2 d1czan3 d1czan1 d1ig8a2 d1czan4 d1bg3a4  
d1bg3a3 d1bg3a2 d1qsaa2 d3wyha\_ d4g9sa1 d3gxra\_ d1qqya\_ d1f6ra\_  
d1ivma\_ d2gv0a\_ d1iiza\_ d2z2fa\_ d1j8xa\_ d1ghla\_ d1b9oa\_ d1741a\_  
d1691a\_ d2o4wa\_ d1p37a\_ d1k28a3 d1xjta1 d1jtma\_ d2f2qa\_ d4e97a1  
d2pjsa1 d1k11a\_ d2i7ra1 d1ecea\_ d1xqaa1 d5cj3a1 d1jifa\_ d2p7oa\_  
d1r9ca\_ d1nkia\_ d1mpya2 d1kw3b2 d1kw3b1 d4ghga1 d1tfza1 d3isqa1  
d3isqa2 d1sqia1 d1sqia2 d1lkda2 d1lkda1 d1cjxa2 d1cjxa1 d1sp9b2  
d1t47a1 d1t47a2 d1f1ua2 d1sp8a1 d1sp8a2 d1f1ua1 d1f74a\_ d3l21a\_  
d2e1da\_ d1to3a1 d1w3ia\_ d1sfla\_ d1n7ka\_ d1vcva1 d4imea\_ d1wa3a\_  
d2ocza1 d1f2ja\_ d3m16a\_ d2yxga\_ d1ub3a\_ d3a5fa\_ d1fbaa\_ d1l6wa\_  
d1xfba1 d1wx0a1 d1vpxa1 d1mxsa\_ d2a4aa1 d1xkya1 d3cq0a1 d3s1xa\_  
d1f05a\_ d1fdja\_ d3cpra1 d4d2ja\_ d1s5ja2 d1qhta2 d4dlea2 d1tgoa2  
d3py8a2 d1q8ia2 d1kfsa2 d2py5a2 d1d5aa2 d1qsta\_ d2beia1 d4m3sa\_  
d1u6ma1 d1ygha\_ d1yk3a1 d3dr6a\_ d1xmta\_ d1z4ea1 d2ge3a1 d2fiaa1  
d2jdca1 d1y9wa1 d3to7a\_ d1wwza1 d2f14a1 d2ozua1 d2b5ga\_ d2cy2a1  
d2p0wa\_ d1cm0a\_ d4pswa\_ d1yrea1 d1yr0a1 d1m4ia\_ d2gana1 d1yvka1  
d1ghea\_ d2g3aa1 d1y7ra1 d2euia1 d1q2ya\_ d2fsra1 d1xeba\_ d2ae6a1  
d1cjwa\_ d1qsma\_ d2aj6a1 d1y9ka1 d1i12a\_ d1vkca\_ d2atra1 d1n71a\_  
d2d4pa1 d2fiwa1 d2fe7a1 d1tiqa1 d2ou2a\_ d1yx0a1 d2fcka1 d1p0ha\_  
d2j8ma\_ d2pq8a\_ d1z4ra1 d1s3za1 d1ufha\_ d1prtc1 d2wv6d\_ d1prtf\_  
d1l1trd\_ d4l63b1 d1r4pb\_ d1prtd\_ d1t10f\_ d2bosa\_ d1prtb1 d3chbd\_  
d1xvqa1 d1pn0a2 d3hy2a\_ d2cvba1 d1o8xa\_ d1lu4a\_ d1we0a1 d2bmxal  
d2a4va1 d1psqa\_ d1xiya1 d1q98a\_ d1n8ja\_ d1zofa1 d2ggta\_ d3tjja\_  
d4jela1 d1o73a\_ d3s9fa\_ d2zcta\_ d1qmva\_ d2b1ka\_ d5dvba1 d2b5xa1  
d2v2ga\_ d1st9a\_ d3tb2a\_ d4llra\_ d4fh8a1 d1e2ya\_ d1knga\_ d2h30a\_  
d1i5ga\_ d2z9sa\_ d2f8aa1 d1tp9a1 d2b7ka\_ d1nm3a2 d3hvva\_ d2wfca1  
d4kcea\_ d1xvwa1 d4gqca1 d3qpma\_ d4k1fa\_ d1zzoa1 d1gp1a\_ d1prxa\_  
d4od7a1 d1z6ma1 d4mcua1 d4dvca1 d1r4wa\_ d3l9sa\_ d1un2a\_ d3rppa\_  
d2m5ta\_ d1cqqa\_ d1wqsa\_ d5bpea\_ d2ipha\_ d1lvoa\_ d2bhga1 d3tnta\_  
d3sjia\_ d3d23a1 d2fyqa\_ d3tloa\_ d3zvea1 d2hrva\_ d3q3ya1 d4asha1  
d1l6ja5 d1l6ja4 d1eaka4 d1eaka3 d1l6ja3 d1h8pa2 d1h8pa1 d1etha2  
d1w52x1 d2ppla1 d1lpbb2 d2oxea1 d1bu8a2 d1rp1a2 d4qmea2 d2xdta2  
d1z5ha2 d1jlia\_ d2rhwa\_ d2ftba\_ d1pmpa\_ d2rcqa1 d1fdqa\_ d4lkpa\_  
d1sa8a\_ d1vyfa\_ d1lpja\_ d3vg7a1 d4azqa1 d1o8va\_ d5bvqa\_ d1p6pa\_  
d2qo4a\_ d1opba\_ d1yiva1 d1o1va\_ d4bvma1 d4tkba\_ d4i3ba\_ d1bwya\_  
d1ftpa\_ d1ggla\_ d4gkca\_ d1cbia\_ d3p6da1 d1kqwa\_ d2a0aa1 d1xwdc1  
d3kj4a\_ d1ozna\_ d1w8aa\_ d2ifga3 d1xkua\_ d1g12a\_ d3p0ya1 d1igra1  
d1igra2 d1n8yc2 d1n8yc1 d1m6ba2 d1m6ba1 d1dzka\_ d4t1ja\_ d2a2ua\_  
d4wfva\_ d3tlda\_ d4iixa\_ d3zq3a\_ d2nnda\_ d1i4ua\_ d1kxoa\_ d1bbpa\_  
d1kt7a\_ d1exsa\_ d3s26a1 d1lf7a\_ d1qfta\_ d4gh7a\_ d1z24a1 d1qabe\_  
d1xkia\_ d1ew3a\_ d3bx7a\_ d4iawa1 d1n0sa\_ d1gkab\_ d3kzaa\_ d2k23a\_

d2l9ca1 d2joza1 d1gm6a\_ d3kffa\_ d3saoa1 d1e5pa\_ d1yupa1 d1iiua\_  
d2tbvc\_ d1c8nc\_ d1x36a\_ d1smvc\_ d1ng0c\_ d4sbvc\_ d1lopoa\_ d1f2nc\_  
d1cixa\_ d1y29a\_ d1v7fa\_ d2jtba\_ d1d1ha\_ d1g9pa\_ d1qk7a\_ d1mb6a\_  
d2a2va\_ d1niya\_ d1i25a\_ d1hvwa\_ d2mpqa\_ d1ie6a\_ d1kqha\_ d1la4a\_  
d2mxoa1 d1d10a\_ d1koza\_ d1qk6a\_ d1emxa\_ d1lqra\_ d1c6wa\_ d1rmka\_  
d1ixta\_ d1eyoa\_ d1cnna\_ d1fu3a\_ d1g1pa\_ d1f3ka\_ d1fyga\_ d1rypd\_  
d1irua\_ d1rypc\_ d3unfk\_ d1rypa\_ d1j2pa\_ d1irui\_ d1j2qh\_ d3unfh\_  
d1m4ya\_ d1rypb\_ d1irul\_ d1irug\_ d1iru2\_ d1q5rh\_ d1rypg\_ d1g3ka\_  
d1iruf\_ d1q5qa\_ d1e94a\_ d1irub\_ d1ryph\_ d3ty6a\_ d1iruj\_ d1iruk\_  
d1rype\_ d1irud\_ d1irue\_ d3mi01\_ d1rypf\_ d2z3ba\_ d1iruc\_ d3mka2\_  
d1irul\_ d1mqta\_ d1d4m3\_ d1fmd3\_ d2mev1\_ glaym.1 d1ev13\_ d4q4w1\_  
d1r1a3\_ d2x5ia\_ d1rhi1\_ g1r1a.1 g1d4m.1 g1rhi.1 d1b35b\_ d1loopa\_  
d1tme1\_ d4iv1a\_ g1pvc.1 g1fpn.1 d1fpn1\_ d4gb31\_ d1d4m1\_ d1fmd1\_  
d1ev11\_ d2wzr3\_ g1cov.1 d1qqp3\_ g1fmd.1 d2x5ic\_ d1rhi3\_ g1oop.1  
d1hxs1\_ g1hxs.1 d1fpn3\_ d1bev1\_ d1eah3\_ d1aym1\_ d1pvc3\_ d1qqp1\_  
d1zba3\_ d1h8ta\_ d3vbhc\_ g1b35.1 g1bev.1 d1hxs3\_ g1ev1.1 d1bev3\_  
g1tmf.1 d1tmf1\_ d1b35a\_ d2mev3\_ g1eah.1 g1h8t.1 d1eah1\_ d4q4w3\_  
d1r1a1\_ d1aym3\_ d1pvc1\_ d1zba1\_ d1h8tc\_ d1loopc\_ d1tme3\_ g1qqp.1  
d4iv1c\_ g1tme.1 d3ubub\_ d1legia\_ d1qo3c\_ d1v7pa\_ d1tdqb\_ d3ubua\_  
d1c3ab\_ d1h8ua\_ d3bx4b\_ d1t8ca1 d1sb2a1 d1qdda\_ d2ziba1 d3cada\_  
d1byfa\_ d1j34b\_ d1jwia\_ d1jzna\_ d1c3aa\_ d1oz7b\_ d1wmza\_ d3bdwb\_  
d1hq8a\_ d1fifa1 d1dv8a\_ d3hupa\_ d1wk1a1 d1umra\_ d2afpa\_ d3bx4a\_  
d1gz2a\_ d1s16a\_ d1v7pb\_ d3g8ka\_ d1ixxa\_ d1j34a\_ d1jwib\_ d1g1sa1  
d1y17a1 d1ja3a\_ d1fvub\_ d3bdwa\_ d1sb2b1 d1fvua\_ d1umrc\_ d1oz7a\_  
d4m17a\_ d3cfwa1 d1ypqa1 d1g1ta1 d3fd4a\_ d3l9jc\_ d4dn8a1 d1v41b\_  
d1rd11\_ d2msba\_ d1eixa\_ d3exra\_ d2ffca1 d2fdsa1 d3n3ma1 d2czda\_  
d2yyua\_ d1vqta1 d1dbta\_ d3ldva1 d4lt9a1 d3tc7a1 d3hoja\_ d3vnda\_  
d3n18a1 d1geqa\_ d3naval d1v5xa\_ d4a2ra1 d3tc6a1 d1ujpa\_ d4ijba\_  
d1xcfa\_ d1vc4a\_ d1rd5a\_ d1qopa\_ d3b5va\_ d2r80b\_ d1cqa1 d1cg5a\_  
d3boma\_ d2h8fb\_ d2raoa\_ d3bj1a\_ d4hrrb\_ d2r50a\_ d3d1kb\_ d2aalb1  
d3zhwa\_ d3hf4b\_ d3gdja\_ d1jebb\_ d3bj1b\_ d1x9fb\_ d1wmub\_ d1gcva\_  
d3bcqb\_ d3d4xb\_ d1gvha1 d2dc3a\_ d3hf4a\_ d4yu3a\_ d3k8ba\_ d1qpwb\_  
d2r80a\_ d3bcqa\_ d1v4wa\_ d3wtgb\_ d1j17a\_ d4esaa\_ d1a9we\_ d3d1ab\_  
d1fsla\_ d4h21a\_ d1v4wb\_ d1mwca\_ d1vhba\_ d1jeba\_ d1spgb\_ d1h97a\_  
d1q1fa\_ d1tu9a1 d3d1aa\_ d1hdsb\_ d3hyub\_ d2zfbb\_ d3fs4a\_ d1oj6a\_  
d1shrb\_ d4h21b\_ d4yu3b\_ d1spga\_ d3hrwa\_ d3qqra\_ d3at5a\_ d4wchd\_  
d3hyua\_ d1cg5b\_ d1uc3a\_ d1hbra\_ d2raob\_ d1outb\_ d4esab\_ d3gdjb\_  
d3qqqa\_ d1x9fc\_ d3vrfa\_ d1litha\_ d3mkba\_ d3d4xa\_ d3mjpa\_ d1j16a\_  
d3fh9a\_ d1outa\_ d2dc3b\_ d1lit2a\_ d3eoka\_ d3g46a\_ d1qpwa\_ d3vrfb\_  
d1ch4a\_ d1x9fd\_ d1hdsa\_ d2zfba\_ d3mkbb\_ d1or4a\_ d3wtga\_ d1a4fa\_  
d3fh9b\_ d3bomb\_ d3cy5a\_ d3at5b\_ d1x9fa\_ d2oifa\_ d4lmbx\_ d1cpcb\_  
d3v57a\_ d1kn1a\_ d1cpca\_ d4f0ta\_ d2vjha\_ d4po5b\_ d1eyxa\_ d1alla\_  
d4f0tb\_ d1b33b\_ d1b8db\_ d4h0mb\_ d1b33a\_ d2vjhb\_ d4lm6b\_ d2vmlb\_  
d1allb\_ d2vjta\_ d3dbja\_ d2vmla\_ d2vjtb\_ d4f0ub\_ d1f99b\_ d4rmpa1

d1liaa\_ dleyxb\_ d2uulb\_ d4lmsb\_ d4f0ua\_ d2bv8a\_ d1f99a\_ d2bv8b\_  
d2c7lb\_ d3dbjb\_ d4rmpb1 d1b8da\_ d4h0ma\_ d3v57b\_ d1liab\_ d2uula\_  
d2j96a\_ g1wh1.1 d3nqyb\_ d4gera\_ d1bqba\_ d2xqfa\_ d1lea5a\_ d1f6wa\_  
d1dx4a\_ d1qe3a\_ d1k4ya\_ d4qwwa\_ d2ha2a\_ d1sfra\_ d1f0na\_ d4qeka\_  
d1g19b1 d1gkub1 d4iuua3 d4bvva\_ d5hpga\_ d3k65a\_ d1ki0a3 d1ki0a2  
d1ki0a1 d1a0ha1 d3sp8a3 d2feba1 d1dosa\_ d1gvfa\_ d3qm3a1 d2fjka\_  
d1cg2a1 d1yloa2 d1y7ea2 d1y0ya3 d1lfwa1 d1fnoa4 d1vhua2 d1ysja1  
d1vhea2 d1z21a1 d2fvga2 d1vgya1 d1r3na1 d2grea2 d1xmba1 g1q71.1  
d1rtqa\_ d3rp2a\_ g1lucy.1 d1fuja\_ d2zchp\_ d3w94a\_ d1si5h\_ d1lo6a\_  
g2pka.1 d1cgha\_ d1kigh\_ d1a5ia\_ d3s9ba\_ d1hj8a\_ d1ao5a\_ d2anya\_  
d1q3xa1 d1gvza\_ d1azza\_ d4gsoa\_ d2f91a1 d1iaua\_ d1gdna\_ d1eufa\_  
g1fiw.1 d1eq9a\_ d4nfea\_ d2rdla\_ d1spja\_ d1elva1 d1a7sa\_ d1ekbb\_  
d1pfxc\_ d1yc0a\_ d2aiqa\_ g1fiz.1 d1fi8a\_ d4k60a\_ d4dgja\_ d1mzaa\_  
d1op0a\_ d3tjva\_ d1pytd\_ d1sgfg\_ g1gg6.1 d2eeka\_ g1rtf.1 d1a0ja\_  
d3g01a\_ d1pytc\_ d4e7na\_ d1ddja\_ d1z8ga1 d2hlca\_ d1npma\_ d1brup\_  
g1jou.1 d1sgfa\_ d1autc\_ g2hnt.1 g1kdq.1 d1orfa\_ d3s69a\_ d4crga\_  
d1fxya\_ d1bqya\_ d1svpa\_ d1mbma\_ d3su6a1 d1cula1 d4agka\_ d1vcpa\_  
d1q31a\_ g1n11.1 d3e90b\_ d1ep5a\_ d3u1jb\_ d1m41a\_ d2bk7a\_ d3fjua\_  
d1z5ra1 d1kwma1 d1uwya2 d2c1ca1 d1tda\_ d1h81a2 d3lgia\_ d3i77a\_  
d2z9ia2 d4nsva\_ d1lcya2 d4jcna\_ d1agja\_ d1os8a\_ d1hpga\_ d1p3ca\_  
d1l1ja\_ d1e69a\_ d1mv5a\_ d3g60a4 g1ii8.1 d1ewqa2 d1ji0a\_ d1v43a3  
d2wmfa1 d1vpla\_ d1g2912 d4a82a2 g1f2t.1 d2d62a1 d3tuic1 d2bbsa1  
d3g60a3 d2ixea\_ d1g6ha\_ d1sgwa1 d2qi9c\_ d3rlfa1 d3b60a1 d3d31a2  
d2pzea1 g1xew.1 d1jj7a\_ d1oxxk2 d2onka1 d1w1wa\_ d1iwea\_ d1qf5a\_  
d1vmaa2 d1nija1 d1np6a\_ d2p67a1 d3ihla\_ d1okkd2 d1lsl1a2 d1slma2  
d1liona\_ d2v40a\_ d1dj3a\_ d3hida\_ d2vola1 d2g0ta1 d1vcoa2 d1j8mf2  
d1xjca\_ d1p9ba\_ d1qzxa3 d1ihua2 d1ihua1 d2qm8a\_ d1dj2a\_ d4ioja\_  
d1cp2a\_ d1yrba2 d1hyqa\_ d3gqba2 d1skye3 d1xp8a1 d1tf7a2 d1tf7a1  
d1ye8a1 d1skyb3 d2qe7d2 d4blta\_ d4huta\_ d3l1daa2 d4hyya\_ d2i3ba1  
d1crla\_ d3j9tb2 d3ntua2 d1vdza1 d2z43a\_ d1e9ra\_ d1nlfa\_ d3ziaa2  
d1n0wa\_ d3ziad2 d3j9ta2 d1pzna2 d3gqbb2 d2i49a\_ d1nnfa\_ d1xvxa\_  
d1ursa\_ d1h3da1 d1iuda\_ d4m1va1 d1twya\_ d3e13x\_ d2nxoa1 d4pfua\_  
d3ttma\_ d1elja\_ d2qmwa1 d1us5a\_ d1y3na1 d1jeta\_ d1uqwa\_ d4f19a1  
d2esna2 d3thia\_ d3fasa1 d2uyeb\_ d2xwva1 d1r91a\_ d2fyia1 d2ozza1  
d1sw5a\_ d1nh8a1 d1vr5a1 d2g29a\_ d1xs5a\_ d3lswa\_ d2z23a\_ d3w9va\_  
d3tcha\_ d1q35a\_ d1z7me1 d3q27a\_ d1p99a\_ d1ve4a1 d2i6ea1 d4mcoa1  
d4n8ya\_ d1eu8a\_ d1zbma1 d1hsla\_ d1lixca2 d1j1na\_ d1xvya\_ d1y9ua\_  
d2z22a1 d1xoca1 d4oera\_ d1wdna\_ d5f1qa1 d1xt8a1 d1i6aa\_ d4gwoa\_  
d4igta1 d1pc3a\_ d4mmpa1 d1o63a\_ d2czla1 d2onsa2 d4mija1 d1eh3a\_  
d3skpa\_ d1dtza1 d1ieja\_ d1jnfa2 d1ce2a1 d1jnfa1 d1b1xa2 d1b1xa1  
d1jw1a1 d1jw1a2 d1ryoa\_ d1h76a1 d1h76a2 d1c4oa1 d2p6ra3 d2p6ra4  
d1oywa2 d1oywa3 d1wrba1 d1w36b2 d1w36b1 d1c4oa2 d3bora\_ d1t6na\_  
d2eyqa5 d2eyqa3 d2eyqa2 d2zu6a2 d1veca\_ d1uaaa1 d1w36d1 d2g9na1  
d1z3ix2 d2rb4a\_ d1hv8a1 d1hv8a2 d1t5ia\_ d1w36c2 d2j0sa2 d2j0sa1

d1fuka\_ d3hjha1 d1z5za1 d1qdea\_ d1z63a1 d1s2ma2 d1s2ma1 d1wp9a1  
d1wp9a2 d1gm5a3 d1gm5a4 d3dina4 d3dina3 d1q0ua\_ d1w36c1 d1z3ix1  
d1nкта3 d1uaaa2 d1w36d2 g1qhh.1 d2fwra2 d2fwra1 d3q3ma\_ d1za0a1  
d1mxra\_ d2inca\_ d1jk0a\_ d2incb\_ d1mhyb\_ d3hf1b\_ d1mtyb\_ d1r2fa\_  
d2uw1a\_ d1mhyd\_ d3n37a\_ d1oquc\_ d1syya\_ d1mtyd\_ d2o1za\_ d1uzra\_  
d1smsa\_ d2fkza\_ d1zujal d1s3qa1 d2fjca1 d1z6om1 d1veia\_ d4dyya\_  
d1jiga\_ d3gvya\_ d2pyba\_ d4cy9a1 d3bvfa1 d1r03a\_ d2cf7a\_ d1nf4a\_  
d1zs3a1 d4iwka\_ d3ka8a\_ d3np0x\_ d1n1qa\_ d1lb3a\_ d4e6ka\_ d1z6oa1  
d2fzfa1 d4dyua\_ d3ge4a\_ d1jgca\_ d4am4a\_ d2z6ma\_ d1ji5a\_ d1vlga\_  
d1lkoa1 d3qz3a\_ d1o9ra\_ d2ffxj\_ d1euma\_ d1yv1a1 d2v2pa\_ d1j30a\_  
d4di0a\_ d1dpsa\_ d1oewa\_ d2qzxa\_ d2asia\_ d1psoe\_ d1miqa\_ d1smra\_  
d2h6ta\_ d1pfza\_ d1lizda\_ d3hd8a\_ d1j71a\_ d1dpja\_ d4aa9a\_ d1t6ex\_  
g1b5f.1 g1lya.1 g1htr.1 d1qdma2 d1bxoa\_ d1wkra\_ d1tzsa\_ d1libqa\_  
d2qzwa\_ d2v76a\_ d1wj1a1 d1aqca\_ d1qqga1 d1ntva\_ d1n3ha\_ d4dbba\_  
d3f0wa1 d1p3ra\_ d1wgua1 d2cy4a1 d3hqca\_ d1wvha1 d1xr0b1 d1bdqa\_  
d3ggta\_ d3ixoa\_ d1mrxa\_ d2haha\_ d1tw7a\_ d4njsa\_ d1sgua\_ d2p3da\_  
d1nsoa\_ d3d3ta\_ d2rkfa\_ d1c6ya\_ d2rspa\_ d3ogpa\_ d3ekwa\_ d2o4na\_  
d2j9ja\_ d3ggua\_ d3lzua\_ d4npua\_ d4j55a\_ d2r8na\_ d2fxda\_ d2p3ca\_  
d4dqea\_ d3ttpa\_ d3t3ca\_ d2p3aa\_ d2hc0a\_ d2fdda\_ d3mwsa\_ d1um8a\_  
d1ixza\_ d1qvra2 d1qvra3 d1qzma\_ d1sxjc2 d1jr3d2 d2p65a\_ d1l8qa2  
d1g8pa\_ d3hu3a3 d1sxjd2 d1in4a2 d1sxja2 d1tuea1 d2ce7a2 d1w5sa2  
d1sxjb2 d1d2na\_ d1ny5a2 d1ofha\_ d2gnoa2 d2a5yb3 d1fnna2 d1u0ja1  
d1lv7a\_ d1liqpa2 d2fnaa2 d1ixsb2 d4gita\_ d1sxje2 d1g41a\_ d1wgda1  
d1wggal d4q5eb\_ d1wjna1 d1se9a\_ d3n3kb\_ d1wz0a1 d1we6a1 d2m0xa\_  
d2gbka\_ d3rt3b1 d1wh3a1 d1sifa\_ d2ekek2 d4ii2b1 d4hk2a1 d1c3ta\_  
d1m94a\_ d1wgha1 d1ttna1 d1j8ca\_ d1wx8a1 d3v6cb1 d2ma9b\_ d4i6lb1  
d1bt0a\_ d2jvca1 d1iyfa\_ d2k1fa\_ d1wxva1 d1wf9a1 d1t0ya\_ d2io0b2  
d1x1ma1 d2gbma\_ d1zw7a1 d2m17a\_ d1we7a1 d2lwp\_ d2gджа\_ d1wjua1  
d1v6ea1 d1v86a1 d4eewa\_ d1wiaa1 d4icva\_ d4gu2a\_ d1wx7a1 d1wy8a1  
d4hjka1 d2faza1 d1v5oa1 d3h33a\_ d1rwja\_ d19hca\_ d1os6a\_ d3bxua\_  
d3h4na\_ d1i77a\_ d3caoa\_ d1j0pa\_ d2ctha\_ d1duwa\_ d2e84a\_ d1hh5a\_  
d1gyoa\_ d3h34a\_ d1wioa4 d1ccza2 d1vcaa1 d1dr9a2 d1ic1a1 d2d9qb1  
d2nxyb2 d1adqa1 d1fnga1 d1uvqb1 d1zs8a1 d2vola1 d2vola2 d1mfbl2  
d2jelh2 d1uwel2 d3qq4b1 d1kjbv\_ d1k5na1 d1osph2 d4odhl2 d1ow0a1  
d1ow0a2 d1bfob2 d3l9ra2 d3jtth1 d2fath2 d4elkb2 d1fn4b2 d2xfxb\_  
d1pg7x2 d1cqka\_ d4k71b2 d1lk2a1 d1eapb2 d4lfhg2 d1i4fa1 d2nw2a2  
d1kfah2 d1mhca1 d1h3ua1 d1wejh2 d1h0db2 d1a5fh2 d1kcvh2 d1mjuh2  
d1qqda1 d1kcrh2 d1k8ia1 d3huja2 d2nnab1 d1nfd2 d3mffb2 d1s9va1  
d1lk3h2 d1q0xl2 d1fv1b1 d1neza1 d4rfeb2 d1r3ha1 d1a6tb2 d1kjva1  
d1pz5b2 d1onqa1 d2bc4a2 d1de4a1 d1k8da1 d1tcra2 d1dn0b2 d1nfde2  
d2xwtb2 d1bfoa2 d1mexh2 d1iakb1 d1ypzf2 d4f7ea2 d1q72l2 d2fbjh2  
d1fe8h2 d1clzh2 d1fngb1 d1uvqa1 d1vgka1 d1c16a1 d4j12a2 d4x99b2  
d1igtb3 d1je6a1 d1q72h2 d1nl dh2 d1teth2 d2hmic2 d1ilca2 d1ilca1  
d1k8ib1 d1q0yh2 d1kfa12 d3frua1 d1pg7w2 d1u58a1 d1igyb4 d1igyb3



d1hyrc1 d1klub1 d1deeb2 d1c12b2 d2bc4b2 d2ig2h2 d1kcvl2 d3wn5b1  
d1lk2b\_ d1lk3l2 d1mjul2 d1sm3h2 d1q0xh2 d1zvsa1 d1ydpal dlu8ib2  
d1ypze2 d1kcu2 d2e3fa\_ d2e3ea\_ d2l1lda\_ d2ny8x\_ d2e3ga\_ d2ny9x\_  
d2nz3a\_ d2l1j7a\_ d1n4na\_ d2m8bb1 d2kyqa\_ d3psma\_ d1jxca\_ d2g1la\_  
d1ugla\_ d4uj0a\_ d2k4ua\_ d1hp2a\_ d2lu9a\_ d1baha\_ d2meoa1 d1wm7a\_  
d1hlya\_ d1n8ma\_ d1j1za\_ d1wpda\_ d1c55a\_ d1pvza\_ d1wt7a\_ d1rjia\_  
d1wz5a\_ d1m2sa\_ d1pjva\_ d1c49a\_ d1qkya\_ d2ktca1 d1wmta\_ d1du9a\_  
d1j5ja\_ d1r1ga\_ d1t0za\_ d2i61a\_ d1t1ta\_ d1sn4a\_ d1kv0a\_ d2lkba\_  
d1npia\_ d1wwna\_ d1pe4a\_ d2kbka\_ d2li7a\_ d1djta\_ d2kbha\_ d1dq7a\_  
d1sega\_ d1omya\_ d1zywa1 d1jzaa\_ d1n9wa1 d1bbua1 d1e1oa1 d1c0aa1  
d1b8aa1 d1l0wa1 d3a74a1 d1iyjb4 d1iyjb5 d1iyjb3 d1o7ia\_ d4ipca1  
d1x3ea\_ d4apva\_ d1jb7a1 d1jb7a2 d1jb7a3 d3kdfa\_ d1ue1b\_ d1wjja1  
d3eiva\_ d1xjva2 d1xjva1 d2ccza2 d1se8a\_ d1l1oc\_ d1jb7b\_ d1qvca\_  
d3ulla\_ d1qzga\_ d1miua4 d1miua5 d1miua3 d3g48a1 d1gd7a\_ d1mkha\_  
d1jjcb3 d1pyba\_ d1y14b1 d2nn6i1 d1i941\_ d2zjra2 d1smxa\_ d2qamc2  
d1hh2p1 d2r7da1 d1r12a2 d1wfga1 d3bzka4 d1x6oa2 d3a0ja\_ d2j01d2  
d2ja9a1 d4q15a\_ d1hr0w\_ d1lluza\_ d2n3sa\_ d2vnud1 d1h95a\_ d1go3e1  
d2nn6h1 d1ne3a\_ d2m01a\_ d1jjga\_ d1e3pa2 d2ix0a3 d2ix0a2 d2lxja\_  
d1ueba3 d1ueba2 d2z0sa1 d1u01a1 d2ix0a1 d2eifa2 d2je6i1 d3i2za1  
d2c35b1 d2ahob2 d1t9ha1 d3i4oa\_ d2qa111 d1jt8a\_ d2nn6g1 d1g6pa\_  
d3cama\_ d1i94q\_ d1c9oa\_ d1d7qa\_ d2ba0a1 d2vnud2 d2vnud3 d1khia2  
d2qalq1 d1wi5a1 d1xtda2 d1ny4a\_ d1fvia1 d1ckma1 d1p16a1 d1x9na2  
d3zxha\_ d1cgla\_ d1rm8a\_ d1eaka2 d1hy7a\_ d2jsda\_ d1cxva\_ d1hv5a\_  
d1i76a\_ d1rpma\_ d2shpa1 d1yfoa\_ d1l8ka\_ d2ooqa1 d1g4us2 d1p15a\_  
d1lara2 d1lara1 d1wcha\_ d2fh7a2 d2fh7a1 d1ohea1 d1ohea2 d2f4da\_  
d1rxda\_ d2hxpa\_ d1xria\_ d1d5ra2 d1fpza\_ d3ezza\_ d4y2ea\_ d1i9sa\_  
d3azya\_ d3wvja\_ d1upsa1 d1ajoa\_ d2hyka\_ d1ajka\_ d2vy0a\_ d1o4ya\_  
d3o5sa\_ d3d6ea\_ d3atga\_ d1dypa\_ d1umza\_ d3i4ia\_ d1c11a\_ d4lbqa\_  
d1a78a\_ d1slta\_ d4no4a\_ d3zsja\_ d3duia\_ d1g86a\_ d1qmja\_ d1hlca\_  
d1tdha3 d1q3ba3 d1ee8a3 d1k82a3 g1qmo.1 d3zyra\_ d1fnya\_ d1n47a\_  
g2ltn.1 d1avba\_ d3usua\_ d1dhkb\_ d1f9ka\_ d1lukga\_ d1g8wa\_ d1g9fa\_  
d1wbfa\_ d3wcsa\_ d1g7ya\_ g1loe.1 d1mvqa\_ d1hq1a\_ d1v6ia\_ d1dbna\_  
d1qnwa\_ d1fx5a\_ d4l8qa\_ d1ioaa\_ d3n35a\_ d1epwa1 d2h0ba\_ d2erfa\_  
d1h30a2 d1h30a1 d3mw4a1 d2r1ba\_ d3v64a1 d1d2sa\_ d3bopa1 d3mw3a1  
d1lokqa1 d1lokqa2 d1dszb\_ d1a6ya\_ d3cbba\_ d1ynwa1 d1r4ia\_ d1hcqa\_  
d2hana\_ d2hanb\_ d2enva1 d1kb4b\_ d2n11b\_ d1l01a\_ d1cita\_ d2dara2  
d2dara1 d1wyha2 d2dloa2 d1rutx4 d1rutx3 d2cuqa2 d1x41a2 d1x41a1  
d1x3ha2 d1x3ha1 d2d8za1 d1x61a2 d1x6aa1 d1x6aa2 d2cora2 d2cora1  
d1v6ga1 d1v6ga2 d2d8za2 d1x64a1 d1x64a2 d1b8ta1 d2co8a1 d1x63a2  
d2dj7a2 d2dj7a1 d2cu8a2 d2cu8a1 d1g47a2 d1g47a1 d1j2oa1 d1wyha1  
d2dloa1 d1wiga1 d1wiga2 d2cupa2 d2cupa3 d1x68a1 d2d8ya2 d2d8ya1  
d1m3va2 d1x62a1 d1x68a2 d1x61a1 d1b8ta3 d1b8ta2 d2d8xa2 d2d8xa1  
d1x4ka1 d1x4ka2 d2cuqa1 d1m3va1 d2co8a2 d1j2oa2 d1x63a1 d2cura1  
d2cura2 d1x62a2 d1op9a\_ d1y01a1 d1letzb1 d1egj11 d2gsib1 d1nj9a1

d4jfhd1 d1laqk11 d1t2ja\_ d1lo4h1 d1zvya1 d3v4v11 d4enec1 d1kxtb\_  
d5e8ea1 d2pxya\_ d4weud\_ d1xiwc\_ d2esvd1 d1qnzh\_ dlogae1 d1f4xh1  
d4n1hb\_ d3ezjb1 d3mlw11 d1kfah1 d1letza1 d1b4jh1 d3cfic\_ d4w68a\_  
d2arja1 d1ek3a\_ d2ok011 d1vera\_ d1uwgh1 d1blnb1 d1fpth1 d1rzga1  
d2giya1 d4m3kb1 d1nc2a1 d2nyyd1 d1ncna\_ d1fbih1 d5dxwa\_ d4fqqa1  
d1dqdh1 d1jfq11 d1kelh1 d1faih1 d1frgl1 d1figl1 d4m6n11 d1fo0a\_  
d4hxb11 d3b5ga\_ d3quyd1 d2h9gb1 d1i8kb\_ d2dd8h1 d2ck0h1 d1eaja\_  
d4w6wb1 d2a6ib3 d1t66d1 d2e27h\_ d1ob1b1 d1f11b1 d2v7na1 d1ad0a1  
d2xt1b1 d1pskh1 d4i13b1 d2op411 d1a0ql1 d1uwell1 d1za3a1 d1ncb11  
d4uu9a\_ d1bm3h1 d1cloh1 d1nqba2 d1cf8h1 d4y5va\_ d1mhph1 d5anma1  
d4cdgc1 d4ldeb\_ d1y0lb1 d2pcpb1 d1z3gl1 d1dfb11 d1fh5h1 d3g5xa1  
d1tzib1 d4dn311 d3zhka1 d2b1hh1 d2uyla1 d1f3dh1 d1nj9b1 d2agjh1  
d2h1p11 d1q72h1 d8fabb1 d1ndmb1 d1rjca1 d4u6hb1 d3upca\_ d2fbj11  
d1osph1 d1tvda\_ d2cjev\_ d4fhbd1 d1bd2d1 d1rz7h1 d3nn8a\_ d1blna1  
d1knoa1 d1nfda1 d2bmkb1 d1dq11\_ d1igyb1 d1igf11 d12e8h1 d3utza1  
d1nc2b1 d1rihh1 d4mwfb1 d4jvpa1 d1mieh1 d1rhfa1 d1fgn11 d1sbsh1  
d1lp9e1 d1dn0a1 d4lqf11 d1iaih1 d1kgcd1 d1mh5b1 d1gpol1 d2g60h3  
d1f8t11 d2jixd1 d4grwh\_ d1fo0b\_ d1bfob1 d1axsa1 d1u9ka\_ d1nmbh\_  
d1h8na1 d1h8na2 d1jguh1 d4eura1 d3sdy11 d35c8h1 d1w7211 d1mvub\_  
d1i9rh1 d1ob1a1 d4wenb\_ d1yeeh1 d3ietc1 d1f58h1 d1ad0b1 d1mqk1\_  
d1nbvh1 d4b50a\_ d3r8bb\_ d1baf11 d1mamh1 d4rgne1 d2gsgb\_ d35c811  
d1bafh1 d1aih1 d2pcpa1 d2fath1 d2x1pa\_ d1orsb1 d1ibgl1 d1shma\_  
d1a2yb\_ d1u0qa\_ d2coqa\_ d1hilb1 d1qfwi\_ d1jv5b\_ d1fn4b1 d5e0qa\_  
d1nsnh1 d1plgl1 d4ocxl1 d1kb5h1 d1rzhf1 d1pg7x1 d2fx7h1 d2oi9c\_  
d1l7il1 d3eyva1 d1d5il1 d4ffyl\_ d1tet11 d1a6wh\_ d1ac6a\_ d3dvfa\_  
d1nfde1 d1mimh1 d1ri8a1 d1jhlh\_ d3dura\_ d1fskb1 d1f97a1 d3so3b1  
d2ak4d1 d1lp9f1 d4z7wf1 d1l7th1 d4y5ya\_ d4x7ec1 d1emth1 d1likf11  
d1nlbh1 d4utal1 d1bjma1 d1eapb1 d1u6ah1 d2dtgd1 d1kj2b\_ d1xeda1  
d1cleh1 d1fgvh\_ d2bnub1 d2fb4h1 d2dtgb1 d1ktrh\_ d1jpth1 d1qkz11  
d4hepg\_ d2atpb1 d1flrh1 d2hrp11 d1mvfa\_ d1iaim1 d3k80a1 d2jb5h1  
d3zkxc\_ d4grwe\_ d1it9h1 d1rhhb1 d3w9ec\_ d1e4wh1 d1sy6h1 d2j6eh1  
d3qxta\_ d1jglh1 d1p7ka1 d1tzhb1 d4n8pa1 d1gaf11 d2jelh1 d1wioa2  
d4i0cc1 d1cicb1 d1lmka2 d1lmka1 d1iqwh1 d1orqb1 d1ejoh1 d1jnlh1  
d4zga1\_ d43c9b\_ d1ggbl1 d1wejh1 d3q6fa1 d1f3dj1 d3c6la1 d1bqlh1  
d3p9wb\_ d1a3r11 d1h0db1 d2uzil\_ d1leo811 d1qfwl\_ d1n7ml1 d1igja1  
d1c5ch1 d2a9mh\_ d1rmfh1 d1fj1b1 d4heme\_ d1ccza1 d1a5fh1 d1ogad1  
d1dlfh\_ d1qa9b\_ d1vgel1 d3qskb\_ d1sjxa\_ d4ozfg1 d1sq2n\_ d1qd0a\_  
d1kcvh1 d1c5db1 d3qcull1 d8faba1 d3bn9d1 d1mjuh1 d4y8dc\_ d7fabh1  
d3dvgb1 d1lo011 d1a6tb1 d1gigh1 d1kcrh1 d2hwz11 d1yjdc1 d3clfl1  
d4krna\_ d1dl7l\_ d1e6ol1 d1mexh1 d3r0ma\_ d4kkna\_ d1fns11 d1oaqh\_  
d1rzia1 d1ucbh1 d1ncw11 d4b41a\_ d1nfd1 d2mpah1 d2d7t11 d4grwf\_  
d4b5ea\_ d1lk3h1 d3u79a\_ d4u3xa\_ d1ghf11 d1bvkb\_ d1mcww1 d1b88a\_  
d1jrhh1 d32c2b1 d4wemb\_ d1dsfh\_ d1op3h1 d1ce111 d1iqda1 d1qoka1  
d1qoka2 d1qfuh1 d2crya1 d1ay1h1 d1oaql\_ d3ab0b\_ d1rur11 d1t4kb1

d1bz7b1 d1n0xh1 d1for1l d1lucb1l d4w6yb\_ d43c9a\_ d2aab1l d1tzia1  
d4n1ca\_ d1k6qh1 d3g9ab\_ d4tvsa1 d1ligmh\_ d1pz5b1 d3dx9a1 d3wxwh\_  
d1kcu1l d3eaka\_ d4qlra1 d1cr9l1 d1d9ka\_ d1f4xl1 d1deea1 d2i27n2  
d1c12a1 d2orbl1 d1j8hd1 d1mcph1 d1c5da1 d1kenh1 d1bd2e1 d1h5ba\_  
d4x7fc1 d3upaa\_ d1t3fa1 d1indh1 d2dtgc1 d4hc1l1 d1zv5a1 d4wgvb\_  
d1uwgl1 d4f37k1 d1aqkh1 d1vesa\_ d3zkqd\_ d1fpt1l d1lo4l1 d1knob1  
d3rrqa\_ d1ct8b1 d4orz\_ d1mlbb1 d4hgkc1 d1dqdl1 d1bogb1 d4ozhe1  
d1dr9a1 d1i7za1 d1dn0b1 d1kell1 d1rzi1 d1ypzf1 d1wtla\_ d1hkfa\_  
d1fail1 d1figh1 d2vyre\_ d1sjva\_ d1ohqa\_ d1bfoa1 d1pkqb1 d1mjul1  
d1b4j1l d1nsl1 d2arjb1 d1p4bh\_ d4aj0a\_ d3nn8b\_ d2rcja1 d1f2xk\_  
d4v1dd\_ d1adqh1 d2eksa\_ d4k3ga\_ d1jfqh1 d1uweh1 d1frgh1 d4gftb\_  
d1uz8b1 d4n1ea\_ d1bm3l1 d1clol1 d3mcka1 d2vq1a1 d1ae6h1 d4aq1b1  
d1uj3b1 d1nbqa1 d1fh5l1 d2ck0l1 d2ywza\_ d1q72l1 d4nbxb\_ d1hila1  
d4hz1b1 d2j88l1 d1zmya1 d1cd0a\_ d1a4ka1 d1pskl1 d1a0qh1 d4krmb\_  
d1ncbh1 d2fbjh1 d1j8he1 d1i3ua\_ d1cf8l1 d1fe8h1 d2plya1 d1eeqa\_  
d2x89a\_ d1ol0a\_ d2r0lh1 d1ub5a1 d1dfbh1 d3eyvb1 d4jdvb1 d4p2cg\_  
d2gsia1 d2agj1l d1u3ha1 d2h1ph1 d1rih1 d1fskc1 d1boga1 d2a77l1  
d1osp1l d1qfoa\_ d3dwta\_ d2fx7l1 d1rz7l1 d3stba1 d1pkqa1 d1b6da1  
d1dzba2 d1dzba1 d1kj2a\_ d4l1ha\_ d1rzgb1 d1dqlh\_ d12e8l1 d1miel1  
d1jmaa\_ d1sbs1l d1fgnh1 d1f58l1 d1mqkh\_ d1ndgb1 d3qegl1 d1iaii1  
d2aw2a1 d1tqbc1 d3fo2a1 d4dkaa\_ d1f8th1 d2g60l1 d2ywy\_ d1uj3a1  
d1yc7a\_ d3bd3a\_ d4w6xb1 d1nmb1\_ d1i8ka\_ d1rjlb1 d1ypze1 d1p7kb1  
d1kxqe\_ d1gpoh1 d2z4qa1 d1w72h1 d1i9rl1 d4qgya1 d4xt1c\_ d2qqnh1  
d1cica1 d3c08h1 d2cd0a\_ d2bdnh1 d1hnga1 d1mam1l d1nldh1 d1cr9h1  
d4lcih1 d3bkyh1 d3qg7l1 d1ai1l1 d1kxvc\_ d4iosd\_ d1l7ih1 d2x1qa\_  
d1ub6b1 d3k74b\_ d1ibgh1 d1teth1 d1igya1 d1hxma1 d2x6ma\_ d2e7la\_  
d5e03a\_ d1qfwm\_ d2r0kh1 d1igjb1 d1rurh1 d1plgh1 d1mj8h1 d1yuhb1  
d3fmg1l d1rzfl1 d1emt1l d1ad9b1 d1igtb1 d1nlb1l d1d5ih1 d3k7ua\_  
d4ffyh\_ d1bwva\_ d3dvga1 d1a6ta1 d1fgvl\_ d4qxgl1 d1mim1l d1jh1l\_  
d2hffb1 d2hh0l1 d1qkzh1 d1l7tl1 d1afvh1 d1iaiii1 d2cjuh\_ d1um5h1  
d2ghwb2 d2ghwb1 d1kgce1 d2fgwh1 d1ikfh1 d1dvfd\_ d2i24n1 d2xtjb\_  
d1za3b1 d2yc1a\_ d2hh0h1 d2x1oa\_ d1bvka\_ d1rjla1 d5e7ba1 d1lgtal  
d1i11b1 d2fb4l1 d1mvua\_ d1jpt1l d32c2a1 d1fvca\_ d1iqdb1 d2hrph1  
d2p4ab\_ d4qo1a\_ d1p2cb1 d1wt5c\_ d1t4ka1 d5c1mb\_ d1it9l1 d1bz7a1  
d1b2wh1 d1e4wl1 d1jnl1l d1yedb1 d1za6b1 d3u7aa\_ d1igfh1 d3gnml1  
d1orsa1 d1wejl1 d1a2ya\_ d1hxmb1 d1gafh1 d2j4wh1 d1pz5a1 d1j05a\_  
d1a3rh1 d4fq1l1 d1qfwh\_ d1eo8h1 d1n7mh1 d4s11a\_ d1kegh1 d5da4a\_  
d1iqw1l d3whxb1 d1vgeh1 d1deeb1 d1c12b1 d1t2ql1 d1ad9a1 d3gsnb1  
d3b2uc1 d1ggbh1 d1t3fb1 d1nak1l d4ocmc\_ d1lila1 d2v7hb3 d2esve1  
d1mcoh1 d2qr0b1 d2q3aa\_ d1ct8a1 d1kcr1l d2pxyb\_ d2uzih\_ d5c3ld\_  
d3durb\_ d1c5cl1 d2ak4e1 d1dl7h\_ d1xiwd\_ d1mlba1 d1rmfl1 d1i7zb1  
d1dlfl\_ d2xa3a\_ d5bq7b1 d1dqqb1 d3h42l1 d1egjh1 d1kcv1l d1fe8l1  
d2j6e1l d1f3rb2 d1l1k3l1 d1sm3h1 d1q0xh1 d1ghfh1 d7fab1l d1igch1  
d1lo0h1 d4idla\_ d5c2bl\_ d1jrh1l d1lila1 d3zhda1 d4kfcz\_ d1b0wa\_

d1e6oh1 d1mexl1 d4krpb\_ d1fnsh1 d1ncwh1 d4hgma\_ d4eigb1 d4rzca\_  
d2mpal1 d4y5xa\_ d5en2b1 d3lrga1 d4ejlc1 d1rhha1 d1j05b\_ d1forh1  
d1q9wb1 d2wzpd\_ d2aq2a1 d1h0da1 d3revb1 d2ij0c1 d1tzh1 d4m7j11  
d1k6q11 d3b9kc1 d1igml\_ d3qeua1 d1dsfl\_ d1ce1h1 d1kcuh1 d1zvha1  
d1zvoa1 d1tqbb1 d1ay1l1 d2qsc11 d2cgrh1 d1n10h1 d1ken11 d3eo0a1  
d4n9ob1 d1n0x11 d3k1kc\_ d2m9wa1 d3dfxa\_ d2aq2b1 d1lenfa1 d1i4pa1  
d1v1oa1 d1et9a1 d1esfa1 d2g9hd1 d4ohja1 d1klud1 d1bxta1 d1eu3a1  
d1ty0a1 d1fnua1 d2cqva1 d1fhga\_ d2k1ma\_ d2d12a1 d1biha3 d1biha1  
d1biha4 d3qp3a1 d1g1ca\_ d1gxea\_ d1cvsc2 d1cvsc1 d1xmwa2 d1m4ka2  
d2otpa2 d1biha2 d1rhfa2 d2fcba2 d2fcba1 d1wwbx\_ d1gsma2 d1epfa1  
d1epfa2 d2dava1 d1waaa\_ d1f97a2 d1x44a1 d1vcaa2 d1fnla2 d1fnla1  
d3b5ha2 d3h8na2 d3h8na1 d1jbja1 d1jbja2 d1pd6a\_ d1f2qa2 d1f2qa1  
d3cx2a\_ d1nbqa2 d3b5ha1 d1n26a1 d1xiwb\_ d1xaua\_ d1fltx\_ d2ifga1  
d1olla1 d1olla2 d1cs6a4 d1cs6a3 d1cs6a2 d1cs6a1 d2gw5a2 d1sy6a1  
d1xiwa\_ d1lucta2 d1lucta1 d1ry7b2 d1g14b\_ d1qz1a3 d1olza1 d2c9aa1  
d1wwca\_

**Family-48 (c.1.8.5)**

**Positive dataset contains 5 protein sequences.**

d4toqa\_ d1wb0a1 d1w9pa1 d2gsja\_ d1vf8a1

**Negative dataset contains 3976 protein sequences.**

d1m32a\_ d1libja\_ d1c7na\_ d1iuga\_ d4q75a\_ d2bkwa1 d1t3ia\_ d1n8pa\_  
d1qz9a\_ d1jf9a\_ d1eg5a\_ d3kgwa\_ d1c11a\_ d2ctza1 d1vjoa\_ d2rfva\_  
d1gc0a\_ d1cs1a\_ d1d2fa\_ d2ch1a1 d1qgna\_ d1pffa\_ d1elua\_ d1u08a\_  
d11c5a\_ d2ay1a\_ d1bw0a\_ d3pd6a\_ d7aata\_ d2csta\_ d1j32a\_ d1fg7a\_  
d4wlha\_ d1o4sa\_ d1v2da\_ d1gdea\_ d1m6sa\_ d1v72a1 d1svva\_ d1ajsa\_  
d1wsta1 d2f8ja2 d11k9a\_ d1vp4a1 d1xi9a1 d2gb3a1 d1yaaa\_ d3i2ka1  
d11nsa3 d1mpxa2 d1xkta1 d2hfka\_ d1jmkc\_ d5d3ka\_ d2cfba1 d1dfoa\_  
d1o69a\_ d1bj4a\_ d3k28a\_ d2bwpa\_ d3lg0a\_ d2fnua\_ d3ou5a\_ d1z7da1  
d1b9ha\_ d1iaya\_ d4msoa\_ d1bs0a\_ d1s0aa\_ d1sffa\_ d3tqxa\_ d1mdoa\_  
d3qboa\_ d3pgya\_ d1bjna\_ d2dkja\_ d1ejia\_ d1vefa1 d4wxga\_ d3bs8a\_  
d3gbxa1 d1w23a\_ d1r0ka3 d1j5pa3 d1vkoa2 d1vm6a2 d3qvsa2 d1gr0a2  
d1p1ja2 d1i26a\_ d1f56a\_ d1bypa\_ d1azca\_ d1ws8a\_ d3u25a\_ d1cuoa\_  
d1id2a\_ d1rkra\_ d2iaac\_ d4dp1x\_ d1nwpa\_ d2gima\_ d2i7sa\_ d1qhqa\_  
d1gyca3 d1hfua2 d1kbva1 d1kbva2 d1sdda1 d1sdda2 d1gyca1 d1gyca2  
d1mzya1 d2bw4a1 d1aoza1 d1aoza3 d1aoza2 d1kyaa2 d1kyaa3 d1kyaa1  
d1mzya2 d4e9sa1 d1sddb1 d1sddb2 d1hfua1 d1hfua3 d1oe1a2 d1oe1a1  
d1v10a2 d1v10a3 d1v10a1 g1f8v.1 d1novc\_ d2bbvc\_ d3sxwa1 d4luka\_  
d1a3qa1 d1liknc\_ d3brda1 d1p7h11 d1oy3c\_ d1imhc1 d1gjia1 d1zk9a1  
d2cxka1 d2bema\_ d1pama1 d1ea9c1 d1qhoa1 d2fhfa2 d2fhfa1 d1k3ia1  
d1j0ha1 d1cxla1 d2bhua1 d1edqa1 d1f1sa2 d1ut9a2 d1gvia1 d1txka1  
d4alac\_ d1rera1 d1s6na\_ d3uzqb\_ d2phla2 d2phla1 d1fxza2 d1fxza1  
d1lrha\_ d1uija1 g1dgw.1 d2v09a\_ d1uika2 d1uika1 d1dgwa\_ d1ds6b\_  
d1fstb\_ d1ex0a1 d1g0da1 d4mh8a\_ d4i7ga1 d1tafa\_ d1tafb\_ d1jfib\_  
d1q9ca\_ d1h3ob\_ d2byka1 d1n1ja\_ d4g92b\_ d1bh9a\_ d1jfia\_ d1h3oa\_

d2bykb1 d1n1jb\_ d2bjca1 d2hsga1 d1qpza1 d1k9ua\_ d2opoa\_ d1ydwa2  
d2nvwa2 d1zh8a2 d1qkia2 d1xeea2 d1t1ta2 d1ebfa2 d1au7a2 d1e3oc2  
d2ovga\_ d1sq8a\_ d1rzsa\_ d3kz3a\_ d3orca\_ d3gpdg2 d2q49a2 d1hdgo2  
d2g17a2 d2cvoa2 d2czca1 d3pwka2 d1i32a2 d1zyao2 d2pkqo2 d1b7go2  
d2hjsa2 d1cf2o2 d1vkna2 d1nvmb2 d2msya\_ d2djoa1 d2r5za\_ d1au7a1  
d1f43a\_ d2lmda1 d1akhb\_ d1s7ea1 d3nara\_ d1zq3p1 d2craa1 d1mija\_  
d4uuta\_ d3a01a\_ d1x58a1 d3rkqa1 d3cmya1 d2cqxa1 d2da6a1 d1e3oc1  
d1fjla\_ d1mh3a1 d1ig7a\_ d1x41a1 d1wh7a1 d1gt0c1 d2mw8a\_ d1lfup\_  
d1x2ma1 d1b72a\_ d1wi3a1 d1jgga\_ d1wjha1 d1x2na1 d1mnm\_ d2cuea1  
d3k2aa\_ d2hosa\_ d2jwta2 d1pufa\_ d1ooc1 d2hi3a\_ d1b8ia\_ d4j19a\_  
d3lnqa\_ d1wh5a1 d1b8ib\_ d2cqra1 d1guua\_ d1ug2a1 d2cqqa1 d2ajea1  
d4a69c\_ d1h8ac1 d2crga1 d2iw5b1 d1xc5a1 d1ofcx1 d2cu7a1 d1wgxa1  
d2cjjal d2ckxa1 d1gvda\_ d1hcra\_ d1tc3c\_ d1gdta1 d1u78a2 d1hlva1  
d1iufa2 d1iufa1 d2iu5a1 d1zk8a1 d2g7sa1 d2fd5a1 d2np5a1 d1z0xa1  
d2id6a1 d2d6ya1 d2i10a1 d1vi0a1 d2oi8a1 d3c07a1 d2ns7a1 d2fq4a1  
d2yvea1 d1t33a1 d2o7ta1 d2np3b1 d2g7ga1 d2gena1 d2fbqa1 d2g7la1  
d2gfna1 d2g3ba1 d2jj7a1 d2hyja1 d1sgma1 d1ui5a1 d2hkua1 d2id3a1  
d4jyka1 d1b10a1 d1d5ya1 d1d5ya2 d3lv8a\_ d1s3ga1 d1zaka1 d1s4qa\_  
d3tvta2 d1uf9a\_ d1khta\_ d1ckea\_ d1osna\_ d1p5zb\_ d4tmka\_ d3cm0a\_  
d1tmka\_ d1jaga\_ d3h86a\_ d1t0hb\_ d1nn5a\_ d2h92a\_ d3kb2a1 d2c95a1  
d1yj5a2 d1kgda\_ d1ly1a\_ d2ak3a1 d1vyva2 d1deka\_ d2grja1 d1p3ja1  
d1y63a\_ d1e4ya1 d1s96a\_ d3iija1 d1lvga\_ d1nksa\_ d1vyua2 d4e22a\_  
d1qf9a\_ d1jjva\_ d1q3ta\_ d1ki9a\_ d1lw7a2 d1teva\_ d1kjwa2 d1gsia\_  
d1g3ma\_ d1j99a\_ d1t8ta1 d1nsta\_ d1fmja\_ d1zrha\_ d1ls6a\_ d2a3ra\_  
d1aqua\_ d2zptx\_ d3ckla\_ d1texa\_ d1q44a\_ d2gwaha\_ d1z0ja1 d3umra2  
d3gj0a1 d2gaoa1 d1yzga1 d1x3sa1 d1puja\_ d1udxa2 d1kk1a3 d2o52a\_  
d1jwyb\_ d1zcaa2 d1zcba2 d2fv8a1 d2cjwa\_ d3dz8a1 d1xzpa2 d1vg8a\_  
d4qxaa\_ d2ew1a1 d1x1ra1 d2bcgy\_ d3doea1 d3cona\_ d3rega\_ d3wyga\_  
d1upta\_ d2b6ha1 d1zd9a1 d1lnza2 d1r5ba3 d1n0ua2 d1r2qa\_ d2f9la1  
d2rhda\_ d3q3jb\_ d3q85a\_ d1efma1 d1r8qa\_ d2gf9a1 d2akab1 d1ek0a\_  
d1z08a1 d2gcoa1 d2dy1a2 d4g01b\_ d2cxxa1 d1svia\_ d3q72a\_ d1ni3a1  
d4ac9a4 d2erxa1 d2bmea\_ d1wxqa1 d2gf0a1 d4ldja1 d1zunb3 d1d5ca\_  
d4lv5b\_ d1efca3 d1kmqa\_ d2g6ba1 d3lrpa\_ d1tada2 d2y8ea\_ d4rd4a1  
d1z06a1 d2heia\_ d3a58b\_ d1u01a2 d1d2ea3 d1zj6a1 d2ocba\_ d3rwoa\_  
d1mr3f\_ d2e9sa1 d4u5xa1 d2iwra\_ d2fn4a1 d3bwdd\_ d2nzja1 d2atva1  
d2ksqa\_ d3l43a\_ d1mkya2 d1mkya1 d1wmsa\_ d1jnja3 d2rmka\_ d1f6ba\_  
d1f60a3 d1gota2 d1jala1 d2fh5b1 d1g16a\_ d2wblc\_ d1m7ba\_ d1wf3a1  
d1f5na2 d1t9ha2 d1z6xa1 d1z0aa1 d2fg5a1 d2a5ja1 d2bcjq2 d1s0ua3  
d1ky3a\_ d4y0va\_ d4lhwa\_ d2qmea1 d2atxa1 d1legaa1 d1ryha\_ d1moza\_  
d1nrjb\_ d2erya1 d3bfka\_ d1puia\_ d1fzqa\_ d3j3az1 d3t5ga\_ d1shza2  
d3defa\_ d2f7sa1 d3raba\_ d3tsoa\_ d3aq4a\_ d2a17a1 d3sfva1 d3bc1a\_  
d2ncda\_ d1sdma\_ d3h4sa1 d2heha\_ d2grya\_ g3kin.1 d1br2a2 d1goja\_  
d1f9va\_ d2mysa2 d1lkxa\_ d3t0qa\_ d4db1a1 d3gbja\_ d1ry6a\_ d1v8ka\_  
d2h0ba\_ d2erfa\_ d1h30a1 d3mw4a1 d1pz7a\_ d2r1ba\_ d3v64a1 d1d2sa\_

d3bopa1 d3mw3a1 d1okqa1 d1okqa2 d1s5ja2 d1qhta2 d4dlea2 d1tgoa2  
d3py8a2 d1q8ia2 d2py5a2 d1d5aa2 d1k8ka2 d1k8ka1 d3uleb1 d3i33a2  
d3i33a1 d1bupa1 d1dkgd2 d1dkgd1 d4ci6a2 d1jcfa1 d4a2ba2 d2fxua1  
d1yaga1 d4cbua2 d1bupa2 d1g99a1 d2e1za2 d2e1za1 d1saza1 d1saza2  
d1ig8a1 d1czan2 d1czan3 d1czan1 d1ig8a2 d1czan4 d1bg3a4 d1bg3a3  
d1bg3a2 d1bg3a1 d3h3no1 d3h3no2 d3ezwa2 d3h1jd1 d2d0oa3 d2d0oa2  
d1nbwa2 d1hroa\_ d4gedb\_ d3zooa\_ d1mz4a\_ d1gu2a\_ d1f1fa\_ d1dvva\_  
d1c6ra\_ d1c75a\_ d1e29a\_ d1gdva\_ d1cnoa\_ d1h32b\_ d1co6a\_ d2bh4x\_  
d2aiua\_ d5cytr\_ d1jdl\_ d1i8oa\_ d2zboa\_ d3dmia\_ d1ls9a\_ d1wvec\_  
d2yk3a\_ d3ph2b\_ d1dw0a\_ d5aura\_ d1q13a\_ d1qn2a\_ d1f1ca\_ d4zzva\_  
d2xspa\_ d1eg1a\_ d4v20a\_ d1ojja\_ d4ipma1 d4csia\_ d3pfza\_ d3ovwa\_  
d2yoka\_ d2nqya\_ d1h4ga\_ d1hixa\_ d1oa2a\_ d1olra\_ d3b7ma\_ d4h7ma1  
d3wp3a\_ d2vgda\_ d1ligoa\_ d3zsea\_ d2nlra\_ d3wx5a\_ d1oa3a\_ d1pvxa\_  
d1m4wa\_ d1f5ja\_ d1oa4a\_ d1ks5a\_ d4ixla1 d2ah2a1 d1n1ta1 d1h32a2  
d1evsa\_ d1cnt1\_ d1pvhb\_ d1z7ca\_ d1huwa\_ d1bgea\_ d1rhga\_ d1f6fa\_  
d1f45b\_ d1i1rb\_ d1axia\_ d1etea\_ d3tgxb\_ d1scfa\_ d2z3qa1 d3qb1a\_  
d1hula\_ d1m48a\_ d4nkqb\_ d1eera\_ d1v7mv\_ d5e4ea\_ d2o27a\_ d3b5ka\_  
d2psma1 d4zf7a\_ d3uf5a\_ d4x51a\_ d1d9ca\_ d4ypgc1 d3oq3a\_ d1lqsl\_  
d1n1fa\_ d1aula\_ d1wu3i\_ d3bes1\_ d3ux9a\_ d3rbaa\_ d2qtra\_ d1nupa\_  
d3l92a\_ d1f9aa\_ d1qjca\_ d2h29a\_ d1vlha\_ d1od6a\_ d1lw7a1 d1mrza2  
d4ruka\_ d2e17a\_ d1iq0a2 d1r6ta2 d1livsa4 d2cyba\_ d1rqga2 d1j09a2  
d2yxna\_ d1f7ua2 d1h3fa1 d1ffya3 d2g36a1 d1nzja\_ d1jila\_ d1n3la\_  
d1i6la\_ d1pfva2 d1h3na3 d3n9ia\_ d3sz3a1 d3sw2a\_ d1moxc\_ d1dx5i3  
d1edmb\_ d1aut12 d1aut11 d1nqlb\_ d1dval1 d1szba2 d1kigl\_ d2y5fl\_  
d1ijqa2 d1gk5a\_ d1g1sa2 d1nt0a3 d1xdtr\_ d1lmja2 d1lmja1 d1nzia2  
d2wphe\_ d1klil\_ d1pfx12 d1pfx11 d1p9ja\_ d1glta2 d1f7ea\_ d4yzub\_  
d2mgpa1 d1b9wa1 d1b9wa2 d2mgpa2 d1ob1c2 d1n1ia2 d1n1ia1 d2npra2  
d2npra1 d1m1xb4 d2y5ia\_ d1qlsa\_ d1psra\_ d3n22a\_ d2egda\_ d4ggfc\_  
d2wcea\_ d2luca\_ d4aqia\_ d3nsia\_ d2lp3a\_ d1j55a\_ d1a4pa\_ d1k8ua\_  
d1nsha\_ d1pvaa\_ d3fs7a\_ d2pvba\_ d1ttxa\_ d1rwya\_ d2kyfa\_ d1rk9a\_  
d1a75a\_ d1exra\_ d1tiza1 d1nyaa\_ d1g8ia\_ d1ggwa\_ d1wdcc\_ d3fwba\_  
d1ggza\_ d2o5ga\_ d1ctaa\_ d1m45a\_ d3i5gc\_ d1sl8a\_ d1fpwa\_ d2scpa\_  
d2roaa\_ d4agra\_ d3pn7b\_ d1br1b\_ d2mysb\_ d1s6ca\_ d1bjfa\_ d2obha\_  
d1jfka\_ d1jff0a\_ d1qv0a\_ d1lkja\_ d2mlfc\_ d2m97a\_ d2d8na\_ d4by5a\_  
d1jbaa\_ d4nqga\_ d1wdcb\_ d2mysc\_ d1j7qa\_ d1s6ia\_ d1uhka2 d1r2ua\_  
d1dtla\_ d3kf9a\_ d3pn7c\_ d1fi6a\_ d1c07a\_ d5d67d\_ d1tuza\_ d1h8ba\_  
d1leg3a1 d2zkmx1 d1snla\_ d1gjya\_ d1y1xa\_ d1hqva\_ d1dvia\_ d1df0a1  
d1qxp2 d4usla\_ d1k94a\_ d2w0pa\_ d2diaa1 d2e9ia2 d2e9ja1 d2dj4a1  
d2eeba1 d2diba1 d2dmba1 d2dmca1 d2d7oa1 d2ee6a1 d2d7pa1 d2eeaa1  
d2di8a1 d1wlha1 d2d7na1 d2nqca\_ d2d7ma1 d2dica1 d3cnka\_ d2k3ta1  
d2eeca1 d1qfha1 d2bp3a1 d1v05a\_ d2ee9a1 d2eeda1 d2di9a1 d3syxa1  
d1mkea1 d2p8va\_ d1xoda1 d1evha\_ d1qc6a\_ d1legxa\_ d1xl4a1 d3vsqa\_  
d2gixa1 d1p7ba1 d2v76a\_ d1wj1a1 d1aqca\_ d1qqga2 d1qqga1 d1ntva\_  
d1n3ha\_ d4dbba\_ d3f0wa1 d1p3ra\_ d1wgua1 d2cy4a1 d3hqca\_ d1wvha1

d1xr0b1 d1wgqa1 d1v89a1 d2coda1 d1zc3b\_ d1wg7a1 d1u5ea1 d1v61a1  
d2coca1 d2ys1a1 d1v5pa1 d1ntya2 d1wjma1 d1wila1 d1u29a\_ d1xx0a1  
d1unqa\_ d2zkmx3 d1fhoa\_ d1v88a1 d2adza1 d1x1fa1 d1p6sa\_ d2coaa1  
d1btka\_ d1v5ma1 d1faoa\_ d2x18a\_ d1dyna\_ d1x1ga1 d4kaxb\_ d2j59m1  
d1ki1b2 d1xcga2 d1txda2 d1u5da1 d1dbha2 d1wlha\_ d1upqa\_ d1v5ua1  
d2fj1a1 d1eaza\_ d2dfka2 d2cofa1 d1kz7a2 d1d4ua2 d91dta1 d2ewda3  
d1up7a1 d2dfda1 d1s6ya1 d1vjta1 d7mdha1 d1hyea1 d1t2da1 d1ojsa3  
d1b8pa1 d1ldna1 d1hyha1 d1civa1 d2a92a1 d1ez4a1 d1i0za1 d1y6ja1  
d1ur5a1 d1ll1da1 d1obba1 d1v8ba1 d1gdha1 d2dlda1 d1mx3a1 d1ygya1  
d1qp8a1 d1li4a1 d1j4aa1 d2naca1 d1npya1 d3t4ea2 d1a4ia1 d1o0sa1  
d2hk9a2 d2egga2 d1b26a1 d1bvua1 d1gq2a1 d1c1da1 d1leha1 d1gtma1  
d1euza1 d1nvtal d3dona2 d1edza1 d1gpja2 d1p77a1 d1nyta1 d1b0aa1  
d1vl6a1 d1v91a1 d1txga2 d3f47a1 d1mv8a2 d2pv7a2 d1xc2a3 d2ahra2  
d4xiya1 d2f1ka2 d1pgja2 d1i36a2 d1np3a2 d1lj8a4 d1teaa3 d1qmgga2  
d2i76a2 d2g5ca2 d1wdka3 d1d1ja2 d3cuma3 d1kola2 d1f8fa2 d1qora2  
d1jqba2 d1vj0a2 d1cdoa2 d1gu7a2 d1d1ta2 d1xa0a2 d2dm6a2 d1jvba2  
d1rjwa2 d1llua2 d1h2ba2 d1tt7a2 d1piwa2 d1o89a2 d1iz0a2 d1yb5a2  
d1uufa2 d1vj1a2 d1e3ia2 d3gpdg1 d1vc2a1 d2nvwa1 d1u8fo1 d1ydwa1  
d1hdgo1 d2g17a1 d1cf2o1 d2czca2 d1r0ka2 d1obfo1 d2cvoa1 d1ebfa1  
d1h6da1 d1i32a1 d1zh8a1 d2q49a1 d1qkia1 d1j5pa4 d3pzra1 d1xeea1  
d1vkoa1 d1vm6a3 d3qvsa1 d2pkqo1 d1b7go1 d1gr0a1 d1p1ja1 d1lc0a1  
d1j0xo1 d3pwka1 d2hjsa1 d1zyao1 d1vkna1 d1tlta1 d1nvmb1 d3sjua\_  
d3ojfa1 d1xu9a1 d2jjya1 d1n7ha\_ d1y1pa1 d1h5qa\_ d1jtva\_ d4fs3a\_  
d2bkaa1 d1gy8a\_ d2c5aa1 d1ulsa\_ d1ooea\_ d2b69a1 d1y5ma1 d1spxa\_  
d1aela\_ d1bxka\_ d1ydea1 d1gega\_ d1hdoa\_ d1o5ia\_ d1e6ua\_ d1snya1  
d2rhca\_ d3zv4a\_ d5ceja\_ d2d1ya1 d3w8ea\_ d2fmua1 d1x1ta\_ d1rpna\_  
d3ay7a1 d1k2wa\_ d1eq2a\_ d2hrba1 d3ruaa\_ d2ew8a1 d4hwka\_ d1xgka\_  
d2bd0a1 d1yo6a1 d2a35a1 d2ntva\_ d1vl8a\_ d1hdca\_ d4bkua\_ d2ag5a1  
d2q45a\_ d1nffa\_ d4iy1a\_ d1zbqa1 d1kewa\_ d1ek6a\_ d1ja9a\_ d2q46a2  
d1iy8a\_ d1cyda\_ d2ptga\_ d1hxha\_ d1uzma1 d3lyla\_ d4m89a\_ d3wyea\_  
d2blla1 d1w6ua\_ d1sb8a\_ d2q2va\_ d4nr0a\_ d1e6wa\_ d2gasa\_ d3oiga1  
d2bgka1 d1mxha\_ d1vl0a1 d1rkxa\_ d1r6da\_ d1wmaa1 d1e7wa\_ d2c07a1  
d1xkqa\_ d3tzha\_ d1g0oa\_ d3lz6a\_ d1qyca\_ d1ledoa\_ d1gz6a\_ d1loc2a\_  
d1t2aa\_ d1zema1 d2xoxa\_ d1z45a2 d1geea\_ d1p33a\_ d3lt0a\_ d4e6pa\_  
d2wyua\_ d1db3a\_ d4q9na\_ d1xhla\_ d4o1ma\_ d1fmca\_ d2uvda\_ d2gdza1  
d1uaya\_ d2z1ma\_ d2o23a2 d2fr1a2 d2fr1a1 d1qsga\_ d1qyda\_ d4zjua\_  
d2a4ka1 d1yb1a\_ d1wvga1 d1yxma1 d3f4ba\_ d1mg5a\_ d1xg5a1 d1r55a1  
d3gboa\_ d1atla\_ d1kufa\_ d1buda\_ d4q1la\_ d1ypla\_ d1wnia\_ d3nqyb\_  
d4gera\_ d1mdwa\_ d1qxp4 d1ziva1 d1zcmal d1t3ca\_ d1lepwa3 d2a97a\_  
d3fiea\_ d3ioqa\_ d1fh0a\_ d1o0ea\_ d1khqa\_ d1m6da\_ d2cb5a\_ d1cs8a\_  
g8pch.1 d1s4va\_ d2pnsa\_ d1vsna1 d1mira\_ d1iwda\_ d2oula\_ d7pcka\_  
d3bwka\_ d3bcna\_ d2p86a\_ d1pvja\_ d1pcia\_ d1deua\_ d4bs6a\_ d1xkga1  
d1cqda\_ d1jqpa2 d2c0ya\_ d2bdza\_ d3p5ua\_ d2o36a\_ d1k9xa\_ d1zoya1  
d1qo8a2 d1d4ca2 d1chua2 d1jnra2 d1kf6a2 d2jk6a2 d2jk6a1 d1fecal

d1fec2 d1lpfa1 d1lpfa2 d1xhca1 d1xhca2 d1dxla2 d1dxla1 d1gera2  
d1m6ia2 d1onfa1 d1onfa2 d3lada2 d3lada1 d1w4xa1 d1w4xa2 d1gesa2  
d1mo9a1 d1xdia1 d1f12a2 d1f12a1 d1fcda1 d1fcda2 d1h6va2 d1h6va1  
d1mo9a2 d1gv4a2 d1gv4a1 d2gv8a2 d2gv8a1 d1aoga1 d1aoga2 d1hyua1  
d1ebda1 d1ebda2 d3dk9a1 d1q1ra2 d1q1ra1 d1gesa1 d1zbfa1 d2z1ha\_  
d2etja1 d3qioa1 d1j11a\_ d2e41a\_ d1j12a\_ d2lsna1 d1io2a\_ d1uaxa\_  
d2yv0x\_ d1mu2a1 d1ekea\_ d1i39a\_ d1pn0a1 d1reoa1 d1ju2a1 d2f5va1  
d3c96a1 d2gmha1 d1pj5a2 d1gpea1 d1n4wa1 d1k0ia1 d2dw4a2 d2ivda1  
d1seza1 d2voua1 d1kdga1 d1s5ja1 d2hbja2 d2igia\_ d1wlja\_ d1qhta1  
d4dlea1 d1tgoa1 d2f96a1 d3tr8a1 d3mxma\_ d1q8ia1 d1y97a1 d1w0ha\_  
d2py5a1 d1noya\_ d1d5aa1 d1yt3a3 d2guia\_ d3mwp1 d4kb1a\_ d1nu0a\_  
d1js9c\_ d1f15b\_ d1za7a\_ d1laja\_ d1b9ra\_ d1offa\_ d1frra\_ d3wcqa\_  
d1e9ma\_ d1l5pa\_ d1wria\_ d1i7ha\_ d3av8a\_ d1czpa\_ d1rfka\_ d3plma1  
d3b2ga\_ d2bt6a2 d3nvva1 d1krha3 d2h88b1 d1n62a2 d1t3qa2 d1kf6b2  
d1zoyb1 d1jq4a\_ d1ffva2 d1dgja2 d1rm6c2 d1r7ha\_ d1faaa\_ d1wika1  
d1xfla\_ d1ttza1 d2f51a1 d1ti3a\_ d1nhoa\_ d1sena\_ d2i4aa\_ d1ep7a\_  
d1zmaa1 d1fo5a\_ d3lefa1 d3diea1 d2yana1 d1z6na1 d1oaza\_ d3zywa1  
d4aj8a\_ d1nm3a1 d4fiwa\_ d1wmja\_ d4hs1a1 d1iloa\_ d1xwaa1 d1wjka1  
d2vmla\_ d1fb6a\_ d1gh2a\_ d1h75a\_ d1nw2a\_ d1kx5b\_ d3a6na\_ d4m6ba2  
d2nqbd\_ d3wkjd\_ d2yfwe\_ d4h9na\_ d5bnxa\_ d1kx5c\_ d3r45a\_ d1eqzb\_  
d4jjnb\_ d1f66c\_ d1eqza\_ d4wnnb\_ d1kx5a\_ d1u35c1 d1lid3a\_ d2nqbc\_  
d1kx5d\_ d1um8a\_ d1ixza\_ d1qvra2 d1qvra3 d1qzma\_ d1sxjc2 d1jr3d2  
d2p65a\_ d1l8qa2 d1g8pa\_ d3hu3a3 d1sxjd2 d1njfa\_ d1in4a2 d1sxja2  
d1tuea1 d2ce7a2 d1w5sa2 d1sxjb2 d1d2na\_ d1ny5a2 d1ofha\_ d2gnoa2  
d2a5yb3 d1fnna2 d1u0ja1 d1lv7a\_ d1iqpa2 d2fnaa2 d1ixsb2 d4gita\_  
d1sxje2 d1g41a\_ d1pd212 d1nhya2 d2a2ra2 d1k0dd2 d1f2ea2 d1gsua2  
d1f3ba2 d2fhea2 d2pvqa1 d1tw9a2 d1oyja2 d1e6ba2 d3ik7a1 d4is0a1  
d1r5aa2 d1jlva2 d1m0ua2 d3gtub2 d1z9ha2 d1okta2 d1axda2 d2gsra2  
d1tu7a2 d1k3ya2 d1zgma1 d1b48a2 d1gnwa2 d1gwca2 d2gsta2 d1glqa2  
d1oe8a2 d1pn9a2 d1v2aa2 d1fw1a2 d1duga2 d1ovna2 d3wyha\_ d4g9sa1  
d3gxra\_ d1qqya\_ d1gd6a\_ d1f6ra\_ d1livma\_ d2gv0a\_ d1iiza\_ d2z2fa\_  
d1j8xa\_ d1gh1a\_ d1b9oa\_ d2pjsa1 d1klla\_ d2i7ra1 d1ecsa\_ d1xqaa1  
d5cj3a1 d1jifa\_ d2p7oa\_ d1r9ca\_ d1nkia\_ d1mpya2 d1kw3b2 d1kw3b1  
d4ghga1 d1tfza1 d3isqa1 d3isqa2 d1sqia1 d1sqia2 d1lkda2 d1mpya1  
d1cjxa2 d1cjxa1 d1sp9b2 d1t47a1 d1t47a2 d1flua2 d1sp8a1 d1sp8a2  
d1flua1 d1iyka2 d1rxta1 d1iica2 d1iica1 d1qsta\_ d2beia1 d4m3sa\_  
d1u6ma1 d1ygha\_ d1yk3a1 d3dr6a\_ d1xmta\_ d1z4ea1 d2ge3a1 d1bo4a\_  
d2fiaa1 d2jdca1 d1y9wa1 d3to7a\_ d1lwza1 d2fl4a1 d2ozua1 d2b5ga\_  
d2cy2a1 d2p0wa\_ d1cm0a\_ d4pswa\_ d1yrea1 d1yr0a1 d1m4ia\_ d2gana1  
d1yvka1 d1ghea\_ d2g3aa1 d1y7ra1 d2eua1 d1q2ya\_ d2fsra1 d1xeba\_  
d2ae6a1 d1cjwa\_ d1qsma\_ d2aj6a1 d1y9ka1 d1i12a\_ d1vkca\_ d2atra1  
d1n71a\_ d2d4pa1 d2fiwa1 d2fe7a1 d1tiqa1 d2ou2a\_ d1yx0a1 d2fcka1  
d2j8ma\_ d2pq8a\_ d1z4ra1 d1s3za1 d1ufha\_ d2hqya1 d2hqya2 d1lrza2  
d1ne9a1 d1ne9a2 d1xvqa1 d1pn0a2 d3hy2a\_ d2cvba1 d1o8xa\_ d1lu4a\_



d1we0a1 d2bmxa1 d2a4va1 d1psqa\_ d1xiya1 d1q98a\_ d1n8ja\_ d1zofa1  
d2ggta\_ d3tjja\_ d4jela1 d1o73a\_ d3s9fa\_ d2zcta\_ d1qmva\_ d1jfua\_  
d2b1ka\_ d5dvba1 d2b5xa1 d2v2ga\_ d1st9a\_ d3tb2a\_ d41lra\_ d4fh8a1  
d1e2ya\_ d1knga\_ d2h30a\_ d1i5ga\_ d2z9sa\_ d2f8aa1 d1tp9a1 d2b7ka\_  
d1nm3a2 d3hvva\_ d2wfca1 d4kcea\_ d1xvwa1 d4gqca1 d3qpma\_ d4k1fa\_  
d1zzoa1 d1gp1a\_ d1prxa\_ d2m5ta\_ d1cqqa\_ d1wqsa\_ d5bpea\_ d2ipha\_  
d1lvoa\_ d2bhga1 d3tnta\_ d3sjia\_ d3d23a1 d2fyqa\_ d3tloa\_ d3zvea1  
d2hrva\_ d3q3ya1 d4asha1 d1e88a1 d1l6ja5 d1l6ja4 d1eaka3 d1l6ja3  
d1h8pa2 d1h8pa1 d1ys1x\_ d4hs9a\_ d1ex9a\_ d1ku0a\_ d3qmma\_ d1mixa2  
d1e5wa2 d1j19a2 d1isna2 d2a16b2 d4l3wa\_ d1llfa\_ d1gz7a\_ d1lukca\_  
d3zxha\_ d1cgla\_ d1rm8a\_ d1eaka2 d1hy7a\_ d2jsda\_ d1cxva\_ d1hv5a\_  
d1i76a\_ d3p0ya1 d1igra1 d1igra2 d1n8yc2 d1n8yc1 d1m6ba1 d1m4la\_  
d2bk7a\_ d3fjua\_ d1z5ra1 d1kwma1 d1uwy2 d1jqga1 d2c1ca1 d1tdta\_  
d2tbvc\_ d1c8nc\_ d1x36a\_ d1smvc\_ d1ng0c\_ d4sbvc\_ d1lopa\_ d1f2nc\_  
d1cixa\_ d1y29a\_ d1v7fa\_ d2jtba\_ d1d1ha\_ d1g9pa\_ d1lupa\_ d1qk7a\_  
d1mb6a\_ d2a2va\_ d1niya\_ d1i25a\_ d1hwva\_ d2mpqa\_ d1ie6a\_ d1la4a\_  
d2mxoa1 d1d10a\_ d1koza\_ d1qk6a\_ d1emxa\_ d1lqra\_ d1c6wa\_ d1rmka\_  
d1ixta\_ d1eyoa\_ d1cna\_ d1fu3a\_ d1glpa\_ d1fyga\_ d1rypd\_ d1irua\_  
d1rypc\_ d3unfk\_ d1rypa\_ d1j2pa\_ d1irui\_ d1j2qh\_ d3unfh\_ d1m4ya\_  
d1rypb\_ d1irul\_ d1irug\_ d1iru2\_ d1q5rh\_ d1rypg\_ d1g3ka\_ d1iruf\_  
d1q5qa\_ d1e94a\_ d1irub\_ d1ryph\_ d3ty6a\_ d1iruj\_ d1iruk\_ d1rype\_  
d1irud\_ d1irue\_ d3mi01\_ d1rypf\_ d1iruh\_ d2z3ba\_ d1iruc\_ d3mka2\_  
d1iru1\_ d1ny721 d1ny722 d1a6ca3 d1a6ca2 d1pgl22 d1pgl21 d1pgl11  
d1ny711 d1mqta\_ d1d4m3\_ d1fmd3\_ d2mev1\_ g1aym.1 d1ev13\_ d4q4w1\_  
d1r1a3\_ d2x5ia\_ d1rhi1\_ g1r1a.1 g1d4m.1 g1rhi.1 d1b35b\_ d1lopa\_  
d1tme1\_ d4iv1a\_ g1pvc.1 g1fpn.1 d1fpn1\_ d4gb31\_ d1d4m1\_ d1fmd1\_  
d1ev11\_ d2wzr3\_ g1cov.1 d1qqp3\_ g1fmd.1 d2x5ic\_ d1rhi3\_ gloop.1  
d1hxs1\_ g1hxs.1 d1fpn3\_ d1bev1\_ g2mev.1 d1aym1\_ d1pvc3\_ d1qqp1\_  
d1zba3\_ d1h8ta\_ d3vbhc\_ g1b35.1 g1bev.1 d1hxs3\_ g1ev1.1 d1bev3\_  
g1tmf.1 d1tmf1\_ d1b35a\_ d2mev3\_ g1eah.1 g1h8t.1 d1eah1\_ d4q4w3\_  
d1r1a1\_ d1aym3\_ d1pvc1\_ d1zba1\_ d1h8tc\_ d1oopc\_ d1tme3\_ g1qqp.1  
d4iv1c\_ g1tme.1 d1y14b1 d2nn6i1 d1i941\_ d2zjra2 d1smxa\_ d2qamc2  
d1hh2p1 d2r7da1 d1r12a2 d1wfqa1 d3bzka4 d1x6oa2 d3a0ja\_ d2j01d2  
d2ja9a1 d4q15a\_ d1hr0w\_ d1luza\_ d2n3sa\_ d2vnud1 d1h95a\_ d1go3e1  
d2nn6h1 d1ne3a\_ d2mo1a\_ d1iz6a2 d1jjga\_ d1e3pa2 d2ix0a3 d2ix0a2  
d2lxja\_ d1ueba3 d1ueba2 d2z0sa1 d1u0la1 d2ix0a1 d2eifa2 d2je6i1  
d3i2za1 d2c35b1 d2ahob2 d1t9ha1 d3i4oa\_ d2qall1 d1jt8a\_ d2nn6g1  
d1g6pa\_ d3cama\_ d1i94q\_ d1c9oa\_ d1d7qa\_ d2ba0a1 d2vnud2 d2vnud3  
d1khia2 d2qalq1 d1wi5a1 d1xta2 d1ny4a\_ d2flia1 d1rpxa\_ d1tqja\_  
d1tqxa\_ d4lt9a1 d3tc7a1 d3hoja\_ d1i4na\_ d3vnda\_ d3n18a1 d1geqa\_  
d3nav1 d1v5xa\_ d4a2ra1 d3tc6a1 d1ujpa\_ d4ijba\_ d1xcfa\_ d1vc4a\_  
d1rd5a\_ d1qopa\_ d3b5va\_ d2r80b\_ d1cqxa1 d1cg5a\_ d1gcvb\_ d3boma\_  
d2h8fb\_ d2raoa\_ d3bj1a\_ d4hrrb\_ d2r50a\_ d3d1kb\_ d2aa1b1 d3zhwa\_  
d3hf4b\_ d3gdja\_ d1jebb\_ d3bj1b\_ d1x9fb\_ d1wmub\_ d1gcva\_ d3bcqb\_

d3d4xb\_ d1gvha1 d2dc3a\_ d3hf4a\_ d4yu3a\_ d3k8ba\_ d1qpwb\_ d2r80a\_  
d3bcqa\_ d1v4wa\_ d3wtgb\_ d1jl7a\_ d4esaa\_ d1a9we\_ d3d1ab\_ d1fsla\_  
d4h21a\_ d1v4wb\_ d1mwca\_ d1vhba\_ d1jeba\_ d1spgb\_ d1h97a\_ d1q1fa\_  
d1tu9a1 d3d1aa\_ d1hdsb\_ d3hyub\_ d2zfb\_ d3fs4a\_ d1oj6a\_ d1shrb\_  
d4h21b\_ d4yu3b\_ d1spga\_ d3hrwa\_ d3qqra\_ d3at5a\_ d4wchd\_ d3hyua\_  
d1cg5b\_ d1uc3a\_ d2raob\_ d1outb\_ d4esab\_ d3gdjb\_ d3qqqa\_ d1x9fc\_  
d3vrf\_ d1litha\_ d3mkba\_ d3d4xa\_ d3mjpa\_ d1jl6a\_ d3fh9a\_ d1louta\_  
d2dc3b\_ d1it2a\_ d3eoka\_ d3g46a\_ d1qpwa\_ d3vrfb\_ d1ch4a\_ d1x9fd\_  
d1hdsa\_ d2zfa\_ d3mkbb\_ d1or4a\_ d3wtga\_ d1a4fa\_ d3fh9b\_ d3bomb\_  
d3cy5a\_ d3at5b\_ d1x9fa\_ d2oifa\_ d4lmb\_ d1cpcb\_ d3v57a\_ d1kn1a\_  
d1cpca\_ d4f0ta\_ d2vjha\_ d4po5b\_ d1eyxa\_ d1alla\_ d4f0tb\_ d1b33b\_  
d1b8db\_ d4h0mb\_ d1b33a\_ d2vjhb\_ d4l6b\_ d2vmlb\_ d1allb\_ d2vjta\_  
d3dbja\_ d2vmla\_ d2vjtb\_ d4f0ub\_ d1f99b\_ d4rmpa1 d1liaa\_ d1eyxb\_  
d2uulb\_ d4lmsb\_ d4f0ua\_ d2bv8a\_ d1f99a\_ d2bv8b\_ d2c71b\_ d3dbjb\_  
d4rmpb1 d1b8da\_ d4h0ma\_ d3v57b\_ d1kn1b\_ d1liab\_ d2uula\_ d2j96a\_  
g1gxs.1 d1azwa\_ d2xqfa\_ d1ea5a\_ d1f6wa\_ d1dx4a\_ d1qe3a\_ d1k4ya\_  
d4qwwa\_ d2ha2a\_ d1r88a\_ d1sfra\_ d4qeka\_ d3c8da2 d2pbla1 d1jkma\_  
d1jjia\_ d1lzl\_ d1jjfa\_ d2i49a\_ d1nnfa\_ d1xvxa\_ d1ursa\_ d1h3da1  
d1iuda\_ d4m1va1 d1twya\_ d3e13x\_ d2nxoa1 d4pfua\_ d3ttma\_ d1elja\_  
d2qmw1 d1y3na1 d1jeta\_ d1uqwa\_ d4f19a1 d2esna2 d3thia\_ d3fasa1  
d2uyeb\_ d2xwva1 d1r91a\_ d2fyia1 d1pb7a\_ d2ozza1 d1sw5a\_ d1nh8a1  
d1vr5a1 d2g29a\_ d1xs5a\_ d3lswa\_ d2z23a\_ d3w9va\_ d3tcha\_ d1q35a\_  
d1z7me1 d3q27a\_ d1p99a\_ d1ve4a1 d2i6ea1 d4mcoa1 d4n8ya\_ d1eu8a\_  
d1zbma1 d1hs1a\_ d1ixca2 d1jl1na\_ d1xvya\_ d1y9ua\_ d2z22a1 d1xoca1  
d4oera\_ d1wdna\_ d5f1qa1 d1xt8a1 d1i6aa\_ d4gwoa\_ d4igta1 d1pc3a\_  
d4mmpa1 d1o63a\_ d2czla1 d2onsa2 d4mija1 d2qvba\_ d2v9za\_ d4kafa1  
d1jmx3 d1pbya3 d1pbya4 d4iuaa3 d4bvva\_ d5hpga\_ d3k65a\_ d1ki0a3  
d1ki0a2 d1ki0a1 d1a0ha1 d1pmla\_ d3sp8a3 d2feba1 d1dosa\_ d3qm3a1  
d2fjka\_ d1f74a\_ d3l21a\_ d2e1da\_ d1to3a1 d1w3ia\_ d1sfla\_ d1n7ka\_  
d1vcva1 d4imea\_ d1wa3a\_ d2ocza1 d1f2ja\_ d3m16a\_ d2yxga\_ d1ub3a\_  
d3a5fa\_ d1fbaa\_ d1l6wa\_ d1xfba1 d1wx0a1 d1vpxa1 d1ojxa\_ d1mxsa\_  
d2a4aa1 d1xkya1 d3cq0a1 d3s1xa\_ d1fdja\_ d3cpra1 d4d2ja\_ d1cg2a1  
d1yloa2 d1y7ea2 d1y0ya3 d1lfwa1 d1vixa1 d1fnoa4 d1vh0a2 d1ysja1  
d1vhea2 d1z21a1 d2fvga2 d1vgya1 d1r3na1 d2grea2 d1xmba1 g1q71.1  
d1rtqa\_ d3rp2a\_ g1lucy.1 d1fuja\_ d2zchp\_ d3w94a\_ d1si5h\_ d1lo6a\_  
g2pka.1 d1cgha\_ d1kigh\_ d1a5ia\_ d3s9ba\_ d1hj8a\_ d1ao5a\_ d2anya\_  
d1q3xa1 d1gvza\_ d1azza\_ d4gsoa\_ d2f91a1 d1iaua\_ d1gdna\_ d1eufa\_  
g1fiw.1 d1eq9a\_ d4nfea\_ d2rdla\_ d1spja\_ d1elva1 d1a7sa\_ d1ekbb\_  
d1yc0a\_ d2aiqa\_ g1fiz.1 d1fi8a\_ d4k60a\_ d4dgja\_ d1mzaa\_ d1lop0a\_  
d3tjva\_ d1pytd\_ d1sgfg\_ g1gg6.1 d2eeka\_ g1rtf.1 d1a0ja\_ d3g01a\_  
d1pytc\_ d4e7na\_ d1ddja\_ d1z8ga1 d2hlca\_ d1npma\_ d1brup\_ g1jou.1  
d1sgfa\_ d1autc\_ g2hnt.1 g1kdq.1 d1orfa\_ d3s69a\_ d4crga\_ d1fxya\_  
d1bqya\_ d2ftba\_ d1pmpa\_ d2rcqa1 d1fdqa\_ d4lkpa\_ d1sa8a\_ d1vyfa\_  
d1lpja\_ d3vg7a1 d4azqa1 d5bvqa\_ d1p6pa\_ d2qo4a\_ d1lopba\_ d1yiva1

d1o1va\_ d4bvma1 d4tkba\_ d4i3ba\_ d1bwya\_ d1ftpa\_ d1ggla\_ d4gkca\_  
d1cbia\_ d3p6da1 d1kqwa\_ d2a0aa1 d1dzka\_ d4tlja\_ d2a2ua\_ d4wfva\_  
d3t1da\_ d4iaxa\_ d3zq3a\_ d2nnda\_ d1i4ua\_ d1kxo\_ d1bbpa\_ d1kt7a\_  
d1exsa\_ d3s26a1 d11f7a\_ d1qfta\_ d4gh7a\_ d1z24a1 d1qabe\_ d1xkia\_  
d1ew3a\_ d3bx7a\_ d4iawa1 d1n0sa\_ d1gkab\_ d3kzaa\_ d2k23a\_ d219ca1  
d2joza1 d1gm6a\_ d3kffa\_ d3saoa1 d1e5pa\_ d1yupa1 d1iia\_ d3lgia\_  
d3i77a\_ d2z9ia2 d4nsva\_ d1lcya2 d4jcna\_ d1agja\_ d1os8a\_ d1hpga\_  
d111ja\_ d1qtfa\_ d1e69a\_ d3g60a4 gl1i8.1 d1ewqa2 d1ji0a\_ d1qhla\_  
d1v43a3 d2wmfa1 d1vpla\_ d1g2912 d4a82a2 g1f2t.1 d2d62a1 d3tuic1  
d2bbsa1 d3g60a3 d2ixea\_ d1g6ha\_ d1sgwa1 d2qi9c\_ d3rlfa1 d3b60a1  
d3d31a2 d2pzea1 g1xew.1 d1jj7a\_ d1oxxk2 d2onka1 d1wlwa\_ d1iwea\_  
d1qf5a\_ d1vmaa2 d1nija1 d1np6a\_ d2p67a1 d3ihla\_ d1okkd2 d1ls1a2  
d1s1ma2 d1iona\_ d2v40a\_ d1dj3a\_ d3hida\_ d2vo1a1 d2g0ta1 d1vcoa2  
d1j8mf2 d1g3qa\_ d1xjca\_ d1qzxa3 d1ihua2 d1ihua1 d2qm8a\_ d1dj2a\_  
d4ioja\_ d1cp2a\_ d1yrba2 d1hyqa\_ d3gqba2 d1skye3 d1xp8a1 d1tf7a2  
d1tf7a1 d1ye8a1 d1skyb3 d2qe7d2 d4blta\_ d4huta\_ d3l1daa2 d4hyya\_  
d2i3ba1 d1cr1a\_ d3j9tb2 d3ntua2 d1vdza1 d2z43a\_ d1e9ra\_ d1n1fa\_  
d3ziaa2 d1n0wa\_ d1g6oa\_ d3ziad2 d3j9ta2 d1pzna2 d3gqbb2 d1gkub1  
d1gkub2 d4ok5a1 d2bmfa1 d2bmfa2 d1yksa1 d1yksa2 d1jr6a\_ d2qeqa1  
d2j1qa1 d1eh3a\_ d3skpa\_ d1dtza1 d1dtza2 d1ieja\_ d1jnfa2 d1ce2a1  
d1jnfa1 d1b1xa2 d1b1xa1 d1jw1a1 d1jw1a2 d1ryoa\_ d1h76a1 d1h76a2  
d1c4oa1 d2p6ra3 d2p6ra4 d1oywa2 d1oywa3 d1wrba1 d1w36b2 d1w36b1  
d1c4oa2 d3bora\_ d1t6na\_ d2eyqa5 d2eyqa3 d2eyqa2 d2zu6a2 d1veca\_  
d1uaaa1 d1w36d1 d2g9na1 d1z3ix2 d2rb4a\_ d1hv8a1 d1hv8a2 d1t5ia\_  
d1w36c2 d2j0sa2 d2j0sa1 d1fuka\_ d3hjha1 d1z5za1 d1qdea\_ d1z63a1  
d1s2ma2 d1s2ma1 d1wp9a1 d1wp9a2 d1gm5a3 d1gm5a4 d3dina4 d3dina3  
d1q0ua\_ d1w36c1 d1z3ix1 d1nkta3 d1nkta4 d1uaaa2 d1w36d2 g1qhh.1  
d2fwra2 d2fwra1 d2v8ta\_ d3q3ma\_ d1za0a1 d1mxra\_ d2inca\_ d1jk0a\_  
d2incb\_ d1mhyb\_ d3hf1b\_ d1mtyb\_ d1r2fa\_ d2uw1a\_ d3n37a\_ d1afra\_  
d1oquc\_ d1syya\_ d1mtyd\_ d2o1za\_ d1uzra\_ d1smsa\_ d2fkza\_ d1zuja1  
d1s3qa1 d2fjca1 d1z6om1 d1veia\_ d4dyya\_ d1jiga\_ d3gvya\_ d2pyba\_  
d4cy9a1 d3bvfa1 d1r03a\_ d2cf7a\_ d1nf4a\_ d1zs3a1 d4iwka\_ d3ka8a\_  
d3np0x\_ d1n1qa\_ d11b3a\_ d4e6ka\_ d1z6oa1 d2fzfa1 d4dyua\_ d3ge4a\_  
d1jgca\_ d4am4a\_ d2z6ma\_ d1ji5a\_ d1vlga\_ d1lkoa1 d1krqa\_ d3qz3a\_  
d1o9ra\_ d2ffxj\_ d1yv1a1 d2v2pa\_ d1j30a\_ d4di0a\_ d1dpsa\_ d1oewa\_  
d2qzxa\_ d2asia\_ d1psoe\_ d1miqa\_ d2h6ta\_ d1pfza\_ d1izda\_ d3hd8a\_  
d1j71a\_ d1dpja\_ d4aa9a\_ d1t6ex\_ g1b5f.1 g1lya.1 g1htr.1 d1qdma2  
d1bxoa\_ d1wkra\_ d1tzsa\_ d1libqa\_ d2qzwa\_ d1ex4a2 d1c6va\_ d1bdqa\_  
d3ggta\_ d3ixoa\_ d1mrxa\_ d2haha\_ d1tw7a\_ d4njsa\_ d1sgua\_ d2p3da\_  
d1nsoa\_ d3d3ta\_ d2rkfa\_ d1c6ya\_ d2rspa\_ d3ogpa\_ d3ekwa\_ d2o4na\_  
d2j9ja\_ d3ggua\_ d31zua\_ d4npua\_ d4j55a\_ d2r8na\_ d2fxda\_ d2p3ca\_  
d4dqea\_ d3ttpa\_ d3t3ca\_ d2p3aa\_ d2hc0a\_ d2fdda\_ d3mwsa\_ d1k8rb\_  
d1wgra1 d1ef5a\_ d1wfy1 d1wgya1 d11fda\_ d2cs4a1 d1wxma1 d2byea1  
d3kh0a1 d2byfa1 d1wxaa1 d1e7ua3 d1h4ra3 d4yl8a1 d2a16a3 d117ya\_

d1wgda1 d1wgga1 d4q5eb\_ d1wjna1 d1se9a\_ d3n3kb\_ d1wz0a1 d1we6a1  
d2m0xa\_ d2gbka\_ d3rt3b1 d1wh3a1 d1sifa\_ d2ekek2 d4ii2b1 d4hk2a1  
d1c3ta\_ d1m94a\_ d1wgha1 d1ttna1 d1wx8a1 d3v6cb1 d2ma9b\_ d4i6lb1  
d1bt0a\_ d2jvca1 d1iyfa\_ d2k1fa\_ d1wxva1 d1wf9a1 d1t0ya\_ d2io0b2  
d1x1ma1 d2gbma\_ d1zw7a1 d2m17a\_ d1ud7a\_ d1we7a1 d2lwp\_ d2gbja\_  
d1wjua1 d1v6ea1 d1v86a1 d4eewa\_ d1wiaa1 d4icva\_ d4gu2a\_ d1wx7a1  
d1wy8a1 d4hjka1 d2faza1 d1v5oa1 d3ruib\_ d1eo6a\_ d3waob\_ d2r2qa1  
d3m95a\_ d3wana\_ d2bcgg1 d2bcgg2 d2dara2 d2dara1 d1wyha2 d2dloa2  
d1rutx4 d1rutx3 d2cuqa2 d1x4la2 d1x4la1 d1x3ha2 d1x3ha1 d2d8za1  
d1x61a2 d1x6aa1 d1x6aa2 d2cora2 d2cora1 d1v6ga1 d1v6ga2 d2d8za2  
d1x64a1 d1x64a2 d1b8ta1 d2co8a1 d1x63a2 d2dj7a2 d2dj7a1 d2cu8a2  
d2cu8a1 d1g47a2 d1j2oa1 d1wyha1 d2dloa1 d1wiga1 d1wiga2 d2cupa2  
d2cupa3 d1x68a1 d2d8ya2 d2d8ya1 d1m3va2 d1x62a1 d1x68a2 d1x61a1  
d1b8ta3 d1b8ta2 d2d8xa2 d2d8xa1 d1x4ka1 d1x4ka2 d2cuqa1 d1m3va1  
d2co8a2 d1j2oa2 d1x63a1 d2cura1 d2cura2 d1x62a2 d2lj7a\_ d1n4na\_  
d2m8bb1 d2kyqa\_ d3psma\_ d1jkza\_ d1jxca\_ d2gl1a\_ d1ugla\_ d4uj0a\_  
d2k4ua\_ d1hp2a\_ d2lu9a\_ d1baha\_ d2meoa1 d1wm7a\_ d1hl1ya\_ d1n8ma\_  
d1jlza\_ d1wpda\_ d1c55a\_ d1pvza\_ d1wt7a\_ d1rjia\_ d1wz5a\_ d1m2sa\_  
d1pjva\_ d1c49a\_ d1qkya\_ d2ktca1 d1wmta\_ d1du9a\_ d1j5ja\_ d1rlga\_  
d1c4qa\_ d1prtcl d2wv6d\_ d1prtfl d1ltrd\_ d4l63b1 d1r4pb\_ d1tl0f\_  
d2bosa\_ d1prtb1 d3chbd\_ d1t0za\_ d2i61a\_ d1t1ta\_ d1sn4a\_ d1kv0a\_  
d2lkba\_ d1npia\_ d1wwna\_ d1pe4a\_ d2kbka\_ d2li7a\_ d1djta\_ d2kbha\_  
d1dq7a\_ d1sega\_ d1omya\_ d1zywa1 d1bbua1 d1e1oa1 d1c0aa1 d1b8aa1  
d1l0wa1 d3a74a1 d1eova1 d1t61c1 d1iyjb4 d1iyjb5 d1iyjb3 d1o7ia\_  
d4ipca1 d1x3ea\_ d4apva\_ d1jb7a1 d1jb7a2 d1jb7a3 d3kdfa\_ d1ue1b\_  
d1wjja1 d3eiva\_ d1xjva2 d1xjva1 d2ccza2 d1se8a\_ d1l1oc\_ d1jb7b\_  
d1qvca\_ d3ulla\_ d1qzga\_ d1miua4 d1miua5 d1miua3 d3g48a1 d1gd7a\_  
d1mkha\_ d1jjcb3 d1pyba\_ d3ubub\_ d1legia\_ d1qo3c\_ d1v7pa\_ d1tdqb\_  
d3ubua\_ d1c3ab\_ d1h8ua\_ d3bx4b\_ d1t8ca1 d1sb2a1 d1qdda\_ d2ziba1  
d3cada\_ d1byfa\_ d1j34b\_ d1jwia\_ d1jzna\_ d1c3aa\_ d1oz7b\_ d1wmza\_  
d3bdwb\_ d1hq8a\_ d1fifa1 d3hupa\_ d1wk1a1 d1umra\_ d2afpa\_ d3bx4a\_  
d1gz2a\_ d1sl6a\_ d1v7pb\_ d3g8ka\_ d1ixxa\_ d1j34a\_ d1jwib\_ d1gl1sa1  
d1y17a1 d1ja3a\_ d1fvub\_ d3bdwa\_ d1sb2b1 d1fvua\_ d1umrc\_ d1oz7a\_  
d4m17a\_ d3cfwa1 d1ypqa1 d1gl1ta1 d3fd4a\_ d3l9jc\_ d4dn8a1 d1v4lb\_  
d1rdl1\_ d2msba\_ d1rpma\_ d2shpa1 d1yfoa\_ d1l8ka\_ d2ooqa1 d1g4us2  
d1p15a\_ d1lara2 d1lara1 d1wcha\_ d2fh7a2 d2fh7a1 d1ohea1 d1ohea2  
d2f4da\_ d1rxda\_ d2hxpa\_ d1xria\_ d1d5ra2 d1fpza\_ d3ezza\_ d4y2ea\_  
d1c1la\_ d4lbqa\_ d1a78a\_ d1slta\_ d4no4a\_ d3zsja\_ d3duia\_ d1g86a\_  
d1is3a\_ d1qmja\_ d1hlca\_ d1tdha3 d1q3ba3 d1k82a3 g1qmo.1 g1len.1  
d3zyra\_ d1fn1ya\_ d1n47a\_ g2ltn.1 d1avba\_ d3usua\_ d1dhkb\_ d1f9ka\_  
d1lukga\_ d1g8wa\_ d1g9fa\_ d1wbfa\_ d3wcsa\_ d1g7ya\_ g1loe.1 d1mvqa\_  
d1hq1a\_ d1v6ia\_ d1dbna\_ d1qnwa\_ d1fx5a\_ d4l8qa\_ d1ioaa\_ d3n35a\_  
d3ubra\_ d1qo8a1 d1d4ca1 d2k3va\_ d1ft5a\_ d1qdba\_ d1mlqa\_ d2j7aa\_  
d1h21a\_ d1ogyb\_ d4fasa\_ d1jnia\_ d1sp3a\_ d3h33a\_ d1rwja\_ d19hca\_

d3bxua\_ d3h4na\_ d1i77a\_ d3caoa\_ d1j0pa\_ d2ctha\_ d1duwa\_ d1ofwa\_  
d2e84a\_ d1hh5a\_ d1gyoa\_ d3h34a\_ d1dszb\_ d1a6ya\_ d3cbba\_ d1ynwa1  
d1r4ia\_ d1hcqa\_ d2hana\_ d2hanb\_ d2enva1 d1kb4b\_ d2n11b\_ d1lo1a\_  
d1adqa1 d1fnga1 d1uvqb1 d1zs8a1 d2vola1 d2vola2 d1mfb12 d2jelh2  
d1uwe12 d3qq4b1 d1kjob\_ d1k5na1 d1osph2 d4odh12 d1low0a1 d1low0a2  
d1bfob2 d3l9ra2 d3jtth1 d2fath2 d4elkb2 d1fn4b2 d2xfxb\_ d1pg7x2  
d1cqka\_ d4k71b2 d1lk2a1 d1eapb2 d4lfhg2 d1i4fa1 d2nw2a2 d1kfah2  
d1mhca1 d1h3ua1 d1wejh2 d1h0db2 d1a5fh2 d1kcvh2 d1mjuh2 d1qqda1  
d1kcrh2 d1k8ia1 d3huja2 d2nnab1 d1nfd2 d3mffb2 d1s9va1 d1lk3h2  
d1q0x12 d1fv1b1 d1neza1 d4rfeb2 d1r3ha1 d1a6tb2 d1kjva1 d1pz5b2  
d1onqa1 d2bc4a2 d1de4a1 d1k8da1 d1tcra2 d1dn0b2 d1nfd2 d2xwtb2  
d1bfoa2 d1mexh2 d1iakb1 d1ypzf2 d4f7ea2 d1q7212 d2fbjh2 d1fe8h2  
d1clzh2 d1fngb1 d1uvqa1 d1vgka1 d1c16a1 d4j12a2 d4x99b2 d1igtb3  
d1je6a1 d1q72h2 d1nldh2 d1teth2 d2hmic2 d1ilca2 d1ilca1 d1k8ib1  
d1q0yh2 d1kfa12 d3frua1 d1pg7w2 d1u58a1 d1igyb4 d1igyb3 d1hyrc1  
d1klub1 d1deeb2 d1c12b2 d2bc4b2 d1kcv12 d3wn5b1 d1lk2b\_ d1lk312  
d1mjul2 d1sm3h2 d1q0xh2 d1zvsal d1ydpal d1u8ib2 d1ypze2 d1kcuh2  
d1op9a\_ d1y0la1 d1letzb1 d1egj11 d2gsib1 d1nj9a1 d4jfh1 d1laqk11  
d1t2ja\_ d1lo4h1 d1zvya1 d3v4v11 d4enec1 d1kxtb\_ d5e8ea1 d2pxya\_  
d4weud\_ d1xiwc\_ d2esvd1 d1qznh\_ d1ogae1 d1f4xh1 d4n1hb\_ d3ezjb1  
d3mlw11 d1kfah1 d1letza1 d1b4jh1 d3cfic\_ d4w68a\_ d2arja1 d1ek3a\_  
d2ok011 d1vera\_ d1uwgh1 d1blnb1 d1fpth1 d1rzga1 d2giya1 d4m3kb1  
d1nc2a1 d2nyyd1 d1ncna\_ d1fbih1 d5dxwa\_ d4fqqa1 d1dqdh1 d1jfq11  
d1kelh1 d1faih1 d1frg11 d1fig11 d4m6n11 d1fo0a\_ d4hxb11 d3b5ga\_  
d3quyd1 d2h9gb1 d1i8kb\_ d2dd8h1 d2ck0h1 d1eaja\_ d4w6wb1 d2a6ib3  
d1t66d1 d2e27h\_ d1ob1b1 d1f11b1 d2v7na1 d1ad0a1 d2xt1b1 d1pskh1  
d4i13b1 d2op411 d1a0q11 d1uwe11 d1za3a1 d1ncb11 d4uu9a\_ d1bm3h1  
d1cloh1 d1nqba2 d1cf8h1 d4y5va\_ d1mhph1 d5anma1 d4cdgc1 d4ldeb\_  
d1y0lb1 d2pcpb1 d1z3g11 d1dfb11 d1fh5h1 d3g5xa1 d1tzib1 d4dn311  
d3zhka1 d2b1hh1 d2uylal d1f3dh1 d1nj9b1 d2agjh1 d2h1p11 d1q72h1  
d8fabbb1 d1ndmb1 d1rjca1 d4u6hb1 d3upca\_ d2fbj11 d1osph1 d1tvda\_  
d2cjh\_ d4fhbd1 d1bd2d1 d1rz7h1 d3nn8a\_ d1blna1 d1knoa1 d1nfdal  
d2bmkb1 d1dq11\_ d1igyb1 d1igf11 d12e8h1 d3utza1 d1nc2b1 d1rihh1  
d4mwfb1 d4jvpa1 d1mieh1 d1rhfa1 d1fgn11 d1sbsh1 d1lp9e1 d1dn0a1  
d4lqf11 d1iaih1 d1kgcd1 d1mh5b1 d1gpol1 d2g60h3 d1f8t11 d2jixd1  
d4grwh\_ d1fo0b\_ d1bfob1 d1axsa1 d1u9ka\_ d1nmbh\_ d1h8na1 d1h8na2  
d1jguh1 d4eura1 d3sdy11 d35c8h1 d1w7211 d1mvub\_ d1i9rh1 d1ob1a1  
d4wenb\_ d1yeeh1 d3ietc1 d1f58h1 d1ad0b1 d1mqk1\_ d1nbvh1 d4b50a\_  
d3r8bb\_ d1baf11 d1mamh1 d4rgne1 d2gsgb\_ d35c811 d1bafh1 d1aih1  
d2pcpa1 d2fath1 d2x1pa\_ d1orsb1 d1libg11 d1shma\_ d1a2yb\_ d1u0qa\_  
d2coqa\_ d1hilb1 d1qfwi\_ d1jv5b\_ d1fn4b1 d5e0qa\_ d1nsnh1 d1plg11  
d4ocx11 d1kb5h1 d1rzfh1 d1pg7x1 d2fx7h1 d2oi9c\_ d1l7il1 d3eyva1  
d1d5il1 d4ffyl\_ d1tet11 d1a6wh\_ d1lac6a\_ d3dvfa\_ d1nfdel d1mimh1  
d1ri8a1 d1jhlh\_ d3dura\_ d1fskb1 d1f97a1 d3so3b1 d2ak4d1 d1lp9f1

d4z7wf1 d1l7th1 d4y5ya\_ d4x7ec1 d1emth1 dlikfl1 d1nlbh1 d4utal1  
d1bjma1 d1eapb1 d1u6ah1 d2dtgd1 d1kj2b\_ d1xeda1 d1cleh1 d1fgvh\_  
d2bnub1 d2fb4h1 d2dtgb1 d1ktrh\_ d1jpth1 d1qkz11 d4hepg\_ d2atpb1  
d1flrh1 d2hrpl1 d1mvfa\_ d1iaim1 d3k80a1 d2jb5h1 d3zkxc\_ d4grwe\_  
d1lit9h1 d1rhhb1 d3w9ec\_ d1e4wh1 d1sy6h1 d2j6eh1 d3qxta\_ d1jglh1  
d1p7ka1 d1tzhb1 d4n8pa1 d1gaf11 d2jelh1 d1wioa2 d4i0cc1 d1cicb1  
d1lmka2 d1lmka1 d1iqwh1 d1orqb1 d1ejoh1 d1jnlh1 d4zg1a\_ d43c9b\_  
d1ggb11 d1wejh1 d3q6fa1 d1f3dj1 d3c61a1 d1bqlh1 d3p9wb\_ d1a3r11  
d1h0db1 d2uzil\_ d1eo811 d1qfwl\_ d1n7ml1 d1igja1 d1c5ch1 d2a9mh\_  
d1rmfh1 d1fj1b1 d4heme\_ d1ccza1 d1a5fh1 d1ogad1 d1dlfh\_ d1qa9b\_  
d1vgell1 d3qskb\_ d1sjxa\_ d4ozfg1 d1sq2n\_ d1qd0a\_ d1kcvh1 d1c5db1  
d3qcull1 d8faba1 d3bn9d1 d1mjuh1 d4y8dc\_ d7fabh1 d3dvgb1 d1lo011  
d1a6tb1 d1gigh1 d1kcrh1 d2hwz11 d1yjdc1 d3clfl1 d4krna\_ d1d171\_  
d1e6ol1 d1mexh1 d3r0ma\_ d4kkna\_ d1fns11 d1loaqh\_ d1rzia1 d1ucbh1  
d1ncw11 d4b41a\_ d1nfd11 d2mpah1 d2d7t11 d4grwf\_ d4b5ea\_ d1lk3h1  
d3u79a\_ d4u3xa\_ d1ghf11 d1bvkb\_ d1mcww1 d1jrhh1 d32c2b1 d4wemb\_  
d1dsfh\_ d1op3h1 d1cell1 d1iqda1 d1qoka1 d1qoka2 d1qfuh1 d2crya1  
d1ay1h1 d1loaq1\_ d3ab0b\_ d1rurl1 d1t4kb1 d1bz7b1 d1n0xh1 d1for11  
d1ucb11 d4w6yb\_ d43c9a\_ d2aab11 d1tzia1 d4n1ca\_ d1k6qh1 d3g9ab\_  
d4tvsal1 d1igmh\_ d1pz5b1 d3dx9a1 d3wxwh\_ d1nakh1 d1kcul1 d3eaka\_  
d4qlra1 d1cr911 d1d9ka\_ d1f4x11 d1deea1 d2i27n2 d1c12a1 d2orb11  
d1j8hd1 d1mcph1 d1c5da1 d1kenh1 d1bd2e1 d1h5ba\_ d4x7fc1 d3upaa\_  
d1t3fa1 d1indh1 d2dtgc1 d4hc111 d1zv5a1 d4wgvb\_ d1uwgl1 d4f37k1  
d1aqkh1 d1vesa\_ d3zkqd\_ d1fpt11 d1lo411 d1knob1 d3rrqa\_ d1ct8b1  
d4orz\_ d1mlbb1 d4hgkc1 d1dqdl1 d1bogb1 d4ozhe1 d1dr9a1 d1i7za1  
d1dn0b1 d1kell1 d1rzi11 d1ypzf1 d1wtla\_ d1hkfa\_ d1fail1 d1figh1  
d2vyre\_ d1sjva\_ d1ohqa\_ d1bfoa1 d1pkqb1 d1mjul1 d1b4j11 d1nsl11  
d2arjb1 d1p4bh\_ d4aj0a\_ d3nn8b\_ d2rcja1 d1f2xk\_ d4v1dd\_ d1adqh1  
d2eksa\_ d4k3ga\_ d1jfqh1 d1luwh1 d1frgh1 d4gftb\_ d1uz8b1 d4nlea\_  
d1bm311 d1clol1 d3mcka1 d2vq1a1 d1ae6h1 d4aq1b1 d1uj3b1 d1nbqa1  
d1fh511 d2ck011 d2ywza\_ d1q7211 d4nxbx\_ d1hila1 d4hz1b1 d2j8811  
d1zmya1 d1cd0a\_ d1a4ka1 d1psk11 d1a0qh1 d4krmb\_ d1ncbh1 d2fbjh1  
d1j8he1 d1i3ua\_ d1cf811 d1fe8h1 d2plya1 d1eeqa\_ d2x89a\_ d1ol0a\_  
d2r0lh1 d1ub5a1 d1dfbh1 d3eyvb1 d4jdvb1 d4p2cg\_ d2gsia1 d2agj11  
d1u3ha1 d2h1ph1 d1rih11 d1fskc1 d1boga1 d2a7711 d1ospl1 d1qfoa\_  
d3dwta\_ d2fx711 d1rz711 d3stba1 d1pkqa1 d1b6da1 d1dzba2 d1dzba1  
d1kj2a\_ d4l1ha\_ d1rzgb1 d1dq1h\_ d12e811 d1miel1 d1jmaa\_ d1sbs11  
d1fgnh1 d1f5811 d1mqkh\_ d1ndgb1 d3qeg11 d1iail1 d2aw2a1 d1tqbc1  
d3fo2a1 d4dkaa\_ d1f8th1 d2g6011 d2ywy\_ d1uj3a1 d1yc7a\_ d3bd3a\_  
d4w6xb1 d1nmb1\_ d1i8ka\_ d1rj1b1 d1ypze1 d1p7kb1 d1kxqe\_ d1gpoh1  
d2z4qa1 d1w72h1 d1i9r11 d4qgya1 d4xt1c\_ d2qqnh1 d1cica1 d3c08h1  
d2cd0a\_ d2bdnh1 d1hnga1 d1mam11 d1nldh1 d1cr9h1 d4lcih1 d3bkyh1  
d3gg711 d1ai111 d1kxvc\_ d4iosd\_ d1l7ih1 d2x1qa\_ d1ub6b1 d3k74b\_  
d1ibgh1 d1teth1 d1igy11 d1hxma1 d2x6ma\_ d2e71a\_ d5e03a\_ d1qfwm\_

d2r0kh1 d1igjbb1 d1rurh1 d1plgh1 d1mj8h1 d1yuhb1 d3fmg11 d1rzfl1  
d1emt11 d1ad9b1 d1igtb1 d1nlbl1 d1d5ih1 d3k7ua\_ d4ffyh\_ d1bwwa\_  
d3dvgal d1a6ta1 d1fgvl\_ d4qxgl1 d1miml1 d1jhl1\_ d2hffb1 d2hh0l1  
d1qkzh1 d1l7t11 d1afvh1 d1iaii1 d2cjuh\_ d1um5h1 d2ghwb2 d2ghwb1  
d1kgce1 d2fgwh1 d1ikfh1 d1dvfd\_ d2i24n1 d2xtjb\_ d1za3b1 d2yc1a\_  
d2hh0h1 d2x1oa\_ d1bvka\_ d1rjla1 d5e7ba1 d1igta1 d1il1b1 d2fb4l1  
d1mvua\_ d1jptl1 d32c2a1 d1fvca\_ d1iqdb1 d2hrph1 d2p4ab\_ d4qo1a\_  
d1p2cb1 d1wt5c\_ d1t4ka1 d5c1mb\_ d1it9l1 d1bz7a1 d1b2wh1 d1e4wl1  
d1jnl11 d1yedb1 d1za6b1 d3u7aa\_ d1igfh1 d3gnml1 d1orsa1 d1wejl1  
d1a2ya\_ d1hxmb1 d1gafh1 d2j4wh1 d1pz5a1 d1j05a\_ d1a3rh1 d4fq1l1  
d1qfwh\_ d1eo8h1 d1n7mh1 d4s11a\_ d1kegh1 d5da4a\_ d1iqwl1 d3whxb1  
d1vgeh1 d1deeb1 d1c12b1 d1t2ql1 d1ad9a1 d3gsnb1 d3b2uc1 d1ggbh1  
d1t3fb1 d1nakl1 d4ocmc\_ d1lila1 d2v7hb3 d2esve1 d1mcoh1 d2qr0b1  
d2q3aa\_ d1ct8a1 d1kcr11 d2pxyb\_ d2uzih\_ d5c3ld\_ d3durb\_ d1c5c11  
d2ak4e1 d1d17h\_ d1xiwd\_ d1mlba1 d1rmfl1 d1i7zb1 d1dlfl\_ d2xa3a\_  
d5bq7b1 d1dqgb1 d3h42l1 d1egjh1 d1kcvl1 d1fe8l1 d2j6el1 d1f3rb2  
d1lk3l1 d1sm3h1 d1q0xh1 d1ghfh1 d7fabl1 d1igch1 d1lo0h1 d4idla\_  
d5c2bl\_ d1jrh11 d1l1la1 d3zhda1 d4kfzc\_ d1b0wa\_ d1e6oh1 d1mexl1  
d4krpb\_ d1fnsh1 d1ncwh1 d4hgma\_ d4eigb1 d4rzca\_ d2mpal1 d4y5xa\_  
d5en2b1 d3lrga1 d4ej1c1 d1rhha1 d1j05b\_ d1forh1 d1q9wb1 d2wzpd\_  
d2aq2a1 d1h0da1 d3revb1 d2ij0c1 d1tzha1 d4m7jl1 d1k6ql1 d3b9kc1  
d1igml\_ d3qeua1 d1dsfl\_ d1celh1 d1kcu1 d1zvha1 d1zvoa1 d1tqbb1  
d1ay1l1 d2qsc11 d2cgrh1 d1nl0h1 d1kenl1 d3eo0a1 d4n9ob1 d1n0xl1  
d3k1kc\_ d2m9wa1 d3dfxa\_ d2aq2b1 d1enfa1 d1i4pa1 d1v1oa1 d1et9a1  
d1esfa1 d2g9hd1 d4ohja1 d1klud1 d1bxta1 d1eu3a1 d1ty0a1 d1fnua1  
d2qaln1 d2cqva1 d1fhga\_ d2k1ma\_ d2dl2a1 d1biha3 d1biha1 d1biha4  
d3qp3a1 d1g1ca\_ d1gxea\_ d1cvsc2 d1cvsc1 d1xmwa2 d1m4ka2 d2otpa2  
d1biha2 d1rhfa2 d2fcba2 d2fcba1 d1wwbx\_ d1gsma2 d1lepfa1 d1lepfa2  
d2dava1 d1waaa\_ d1f97a2 d1x44a1 d1vcaa2 d1fnla2 d1fnla1 d3b5ha2  
d3h8na2 d3h8na1 d1bjba1 d1bjba2 d1pd6a\_ d1f2qa2 d1f2qa1 d3cx2a\_  
d1nbqa2 d3b5ha1 d1n26a1 d1xiwb\_ d1xaua\_ d1fltx\_ d2ifga1 d1olla1  
d1olla2 d1cs6a4 d1cs6a3 d1cs6a2 d1cs6a1 d2gw5a2 d1sy6a1 d1xiwa\_  
d1ucta2 d1ucta1 d1ry7b2 d1gl4b\_ d1qz1a3 d1olza1 d2c9aa1 d1wwca\_

**Family-49 (c.2.1.1)**

**Positive dataset contains 5 protein sequences.**

d1xa0a2 d2dm6a2 d1tt7a2 d1piwa2 d1yb5a2

**Negative dataset contains 3781 protein sequences.**

d1libja\_ d1c7na\_ d1iuga\_ d4q75a\_ d2bkwa1 d1t3ia\_ d1n8pa\_ d1qz9a\_  
d1jf9a\_ d1eg5a\_ d1p3wa\_ d3kgwa\_ d1cl1a\_ d2ctza1 d1vjoa\_ d2rfva\_  
d1gc0a\_ d1cs1a\_ d1d2fa\_ d2ch1a1 d1qgna\_ d1pffa\_ d1elua\_ d1u08a\_  
d1lc5a\_ d1b5pa\_ d2ay1a\_ d1bw0a\_ d3pd6a\_ d7aata\_ d1j32a\_ d1fg7a\_  
d4wlha\_ d1o4sa\_ d1v2da\_ d1gdea\_ d1m6sa\_ d1v72a1 d1svva\_ d1ajsa\_  
d1wsta1 d2f8ja2 d1lk9a\_ d1vp4a1 d1xi9a1 d2gb3a1 d1yaaa\_ d3i2ka1  
d1lnsa3 d1mpxa2 d2cfba1 d1dfoa\_ d1o69a\_ d1bj4a\_ d3k28a\_ d2bwpa\_

d3lg0a\_ d2fnua\_ d3ou5a\_ dlz7da1 d1b9ha\_ dliaya\_ d4msoa\_ d1bs0a\_  
d1s0aa\_ d1sffa\_ d3tqxa\_ dlmdoa\_ d3qboa\_ d3pgya\_ d1bjna\_ d2dkja\_  
d1ejia\_ d1vefa1 d4wxga\_ d3bs8a\_ d3gbxa1 d1w23a\_ d2b5aa1 d2ofya1  
d4mcxa\_ d2xi8a\_ d2icta\_ d2bnma1 d2ppxa1 d1y7ya1 d1cixa\_ d1y29a\_  
d1v7fa\_ d2jtba\_ d1d1ha\_ d1g9pa\_ d1lupa\_ d1qk7a\_ d1mb6a\_ d2a2va\_  
d1niya\_ d1i25a\_ d1hvwa\_ d2mpqa\_ d1ie6a\_ d1kqha\_ d1la4a\_ d2mxoa1  
d1d10a\_ d1koza\_ d1qk6a\_ d1emxa\_ d1lqra\_ d1c6wa\_ d1fwxa1 d1libya\_  
d2wo3b\_ d1shxa\_ d1f56a\_ d1bypa\_ d1azca\_ d1ws8a\_ d3u25a\_ d1cuoa\_  
d1id2a\_ d1rkra\_ d2iaac\_ d4dplx\_ d1nwpa\_ d2gima\_ d2i7sa\_ d1qhqa\_  
d1gyca3 d1hfua2 d1kbva1 d1kbva2 d1sdda1 d1sdda2 d1gyca1 d1mzya1  
d2bw4a1 d1aoza1 d1aoza3 d1aoza2 d1kyaa2 d1kyaa3 d1kyaa1 d1mzya2  
d4e9sa1 d1sddb1 d1sddb2 d1hfua1 d1hfua3 d1oela2 d1oela1 d1v10a2  
d1v10a3 d1v10a1 d1rypd\_ d1irua\_ d1rypc\_ d3unfk\_ d1rypa\_ d1j2pa\_  
d1irui\_ d1j2qh\_ d3unfh\_ d1m4ya\_ d1rypb\_ d1irul\_ d1irug\_ d1iru2\_  
d1q5rh\_ d1rypg\_ d1g3ka\_ d1q5qa\_ d1e94a\_ d1irub\_ d1ryph\_ d3ty6a\_  
d1iruj\_ d1iruk\_ d1rype\_ d1irud\_ d1irue\_ d3mi01\_ d1rypf\_ d1iruh\_  
d2z3ba\_ d1iruc\_ d3mka2\_ d1irul\_ d1a3qa1 d1iknc\_ d3brda1 d1oy3c\_  
d1imhc1 d1gjia1 d1zk9a1 d2cxka1 d2bema\_ d1pama1 d1lea9c1 d1qhoa1  
d2fhfa2 d2fhfa1 d1k3ia1 d1j0ha1 d1cxla1 d2bhua1 d1edqa1 d1f1sa2  
d1ut9a2 d1gvia1 d1txka1 d1adqa1 d1fnga1 d1uvqb1 d1zs8a1 d2vola1  
d2vola2 d1mfb12 d2jelh2 d1uwel2 d3qq4b1 d1kjvb\_ d1k5na1 d1osph2  
d4odh12 d1ow0a1 d1ow0a2 d1bfob2 d3l9ra2 d3jtth1 d2fath2 d4elkb2  
d1fn4b2 d2xfxb\_ d1pg7x2 d1cqka\_ d4k71b2 d1lk2a1 d1eapb2 d4lfhg2  
d1i4fa1 d2nw2a2 d1kfah2 d1mhca1 d1h3ua1 d1wejh2 d1h0db2 d1a5fh2  
d1kcvh2 d1mjuh2 d1qqda1 d1kcrh2 d1k8ia1 d3huja2 d2nnab1 d1nfd2  
d3mffb2 d1s9va1 d1lk3h2 d1q0x12 d1fv1b1 d1neza1 d4rfeb2 d1r3ha1  
d1a6tb2 d1kjva1 d1pz5b2 d1onqa1 d2bc4a2 d1de4a1 d1k8da1 d1tcra2  
d1dn0b2 d1nfde2 d2xwtb2 d1bfoa2 d1mexh2 d1iakb1 d1ypzf2 d4f7ea2  
d1q72l2 d2fbjh2 d1fe8h2 d1clzh2 d1fngb1 d1uvqa1 d1vgka1 d1c16a1  
d4j12a2 d4x99b2 d1igtb3 d1je6a1 d1q72h2 d1nldh2 d1teth2 d2hmic2  
d1i1ca2 d1i1ca1 d1k8ib1 d1q0yh2 d1kfa12 d3frua1 d1pg7w2 d1u58a1  
d1igyb4 d1igyb3 d1hyrc1 d1klub1 d1deeb2 d1c12b2 d2bc4b2 d2ig2h2  
d1kcv12 d3wn5b1 d1lk2b\_ d1lk3l2 d1mjul2 d1sm3h2 d1q0xh2 d1zvsal  
d1ydpal d1u8ib2 d1ypze2 d1kcuh2 d4alac\_ d1pjwa\_ d1rera1 d1s6na\_  
d3uzqb\_ d2phla2 d2phla1 d1fxza2 d1fxza1 d1lrha\_ d1uija1 g1dgw.1  
d2v09a\_ d1uika2 d1uika1 d1ds6b\_ d1fstb\_ d1ex0a1 d1g0da1 d1ju8a\_  
d3us3a3 d3us3a1 d4w9ta\_ d1jvna1 d4x2ra1 d1qo2a\_ d4axka1 d1thfd\_  
d1h5ya\_ d4u28a\_ d2y88a\_ d4wd0a\_ d1vzwa1 d4mh8a\_ d1mu2a2 d4i7ga1  
d1k9ua\_ d2opoa\_ d1r0ka3 d1j5pa3 d1vkoa2 d1vm6a2 d3qvsa2 d1gr0a2  
d1p1ja2 d4aw8a\_ d3gpdg2 d2q49a2 d1hdgo2 d2g17a2 d2cvoa2 d2czca1  
d3pwka2 d1obfo2 d1i32a2 d1zyao2 d2pkqo2 d1b7go2 d2hjsa2 d1vkna2  
d1nymb2 d2msya\_ d2djoa1 d2r5za\_ d1au7a1 d1f43a\_ d2lmda1 d1akhb\_  
d1s7ea1 d3nara\_ d1zq3p1 d2craa1 d1mija\_ d4uuta\_ d3a01a\_ d1x58a1  
d3rkqa1 d3cmya1 d2cqxa1 d2da6a1 d1e3oc1 d1fjla\_ d1mh3a1 d1x41a1



d1wh7a1 d1gt0c1 d2mw8a\_ d1lfup\_ d1x2ma1 d1b72a\_ d1wi3a1 d1jgga\_  
d1wjha1 d1x2na1 d1mnmc\_ d2cuea1 d3k2aa\_ d2hosa\_ d2jwta2 d1pufa\_  
d1octc1 d2hi3a\_ d1b8ia\_ d4j19a\_ d3lnqa\_ d1wh5a1 d1b8ib\_ d1hcra\_  
d1tc3c\_ d1gdta1 d1u78a2 d1hlva1 d1hlva2 d1iufa2 d1ligna1 d2iu5a1  
d1zk8a1 d2g7sa1 d2fd5a1 d2np5a1 d1z0xa1 d2id6a1 d2d6ya1 d2i10a1  
d1vi0a1 d2oi8a1 d3c07a1 d2ns7a1 d2fq4a1 d2yvea1 d1t33a1 d2o7ta1  
d1rhta1 d2np3b1 d2g7ga1 d2gena1 d2fbqa1 d2g7la1 d2gfna1 d2g3ba1  
d2jj7a1 d2hyja1 d1sgma1 d1ui5a1 d2hkua1 d2id3a1 d4jyka1 d3lv8a\_  
d1s3ga1 d1zakal d1s4qa\_ d3tvta2 d1uf9a\_ d1khta\_ d1ckea\_ d1osna\_  
d1p5zb\_ d4tmka\_ d3cm0a\_ d1tmka\_ d1jaga\_ d3h86a\_ d1t0hb\_ d1nn5a\_  
d2h92a\_ d3kb2a1 d2c95a1 d1yj5a2 d1kgda\_ d1ly1a\_ d2ak3a1 d1vyva2  
d1deka\_ d2grja1 d1p3ja1 d1y63a\_ d1e4ya1 d1s96a\_ d3iija1 d1lvga\_  
d1vyua2 d4e22a\_ d1qf9a\_ d1jjva\_ d1q3ta\_ d1ki9a\_ d1lw7a2 d1teva\_  
d1kjwa2 d1gsia\_ d1g3ma\_ d1j99a\_ d1t8ta1 d1nsta\_ d1fmja\_ d1zrha\_  
d1ls6a\_ d2a3ra\_ d2zptx\_ d3ckla\_ d1texas\_ d1q44a\_ d2gwaha\_ d1z0ja1  
d3umra2 d3gj0a1 d2gaoa1 d1yzga1 d1x3sa1 d1g7sa4 d1puja\_ d1ludxa2  
d1kk1a3 d2o52a\_ d1jwyb\_ d1zcaa2 d1zcba2 d2fv8a1 d2cjwa\_ d3dz8a1  
d1xzpa2 d1vg8a\_ d4qxaa\_ d2ew1a1 d1x1ra1 d2bcgy\_ d3doea1 d3cona\_  
d3rega\_ d3wyga\_ d1upta\_ d2b6ha1 d1zd9a1 d1lnza2 d1r5ba3 d1r2qa\_  
d2f91a1 d2rhda\_ d3q3jb\_ d3q85a\_ d1efma1 d1r8qa\_ d2gf9a1 d2akab1  
d1ek0a\_ d1z08a1 d2gcoa1 d2dy1a2 d4g01b\_ d2cxa1 d1svia\_ d3q72a\_  
d1ni3a1 d4ac9a4 d2erxa1 d2bmea\_ d1wxqa1 d2gf0a1 d4ldja1 d1zunb3  
d1d5ca\_ d4lv5b\_ d1efca3 d1kmqa\_ d2g6ba1 d3lrpa\_ d1tada2 d2y8ea\_  
d4rd4a1 d1z06a1 d2heia\_ d3a58b\_ d1u01a2 d1d2ea3 d1zj6a1 d2ocba\_  
d3rwoa\_ d1mr3f\_ d2e9sa1 d4u5xa1 d2iwra\_ d2fn4a1 d3bwdd\_ d2nzja1  
d2atva1 d2ksqa\_ d3l43a\_ d1mkya2 d1mkya1 d1wmsa\_ d1jnja3 d2rmka\_  
d1f6ba\_ d1f60a3 d1gota2 d1jala1 d2fh5b1 d1g16a\_ d2wblc\_ d1m7ba\_  
d1wf3a1 d1f5na2 d1t9ha2 d1z6xa1 d1z0aa1 d2fg5a1 d2a5ja1 d2bcjq2  
d1s0ua3 d1ky3a\_ d4y0va\_ d4lhwa\_ d2qmea1 d2atxa1 dlegaa1 d1ryha\_  
d1moza\_ d1nrjb\_ d2erya1 d3bfka\_ d1puia\_ d1fzqa\_ d3j3az1 d3t5ga\_  
d1shza2 d3defa\_ d2f7sa1 d3raba\_ d3tsoa\_ d3aq4a\_ d2a17a1 d3sfva1  
d3bc1a\_ d2ncda\_ d1sdma\_ d3h4sa1 d2heha\_ d2grya\_ g3kin.1 d1kk8a2  
d1br2a2 d1f9va\_ d2mysa2 d1lkxa\_ d3t0qa\_ d4db1a1 d3gbja\_ d1ry6a\_  
d1v8ka\_ d2ovga\_ d1sq8a\_ d1rzsa\_ d3kz3a\_ d3orca\_ d1kb0a1 d1k8ka2  
d1k8ka1 d3uleb1 d3i33a2 d3i33a1 d1bupa1 d1dkgd2 d1dkgd1 d4ci6a2  
d1jcfa1 d4a2ba2 d2fxua1 d1yaga2 d1yaga1 d4cbua2 d1bupa2 d3vrda1  
d3vrda2 d1fcdc2 d1h1oa2 d1h1oa1 d1m70a2 d1m70a1 d1ig8a1 d1czan2  
d1czan3 d1czan1 d1ig8a2 d1czan4 d1bg3a4 d1bg3a2 d1bg3a1 d1nira1  
d1qksa1 d1hroa\_ d4gedb\_ d3zooa\_ d1mz4a\_ d1gu2a\_ d1f1fa\_ d1dvva\_  
d1c6ra\_ d1c75a\_ d1e29a\_ d1gdva\_ d1cnoa\_ d1h32b\_ d1co6a\_ d2bh4x\_  
d2aiua\_ d5cytr\_ d1jdl\_ d1i8oa\_ d2zboa\_ d3dmia\_ d1ls9a\_ d1wvec\_  
d2yk3a\_ d3ph2b\_ d1dw0a\_ d5aura\_ d1ql3a\_ d1qn2a\_ d1f1ca\_ d4zzva\_  
d2xspa\_ d1eg1a\_ d4v20a\_ d1ojja\_ d4ipma1 d1gpia\_ d4csia\_ d3pfza\_  
d3ovwa\_ d2yoka\_ d2nqya\_ d1h4ga\_ d1hixa\_ d1oa2a\_ d1olra\_ d3b7ma\_

d4h7ma1 d3wp3a\_ d2vgda\_ d1ligoa\_ d3zsea\_ d2nlra\_ d3wx5a\_ d1oa3a\_  
d1pvxa\_ d1m4wa\_ d1f5ja\_ d1oa4a\_ d1ks5a\_ d4ixla1 d1h32a2 d1evsa\_  
d1cnt1\_ d1pvhb\_ d1z7ca\_ d1huwa\_ d1rhga\_ d1f6fa\_ d1f45b\_ d1i1rb\_  
d1axia\_ d1etea\_ d3tgxb\_ d1scfa\_ d2z3qa1 d3qb1a\_ d1hula\_ d1m48a\_  
d4nkqb\_ d1eera\_ d1v7mv\_ d5e4ea\_ d2o27a\_ d3b5ka\_ d2psma1 d4zf7a\_  
d3uf5a\_ d4x51a\_ d1d9ca\_ d4ypgc1 d3oq3a\_ d1lqsl\_ d1n1fa\_ d1au1a\_  
d1wu3i\_ d3bes1\_ d3ux9a\_ d3rbaa\_ d2qtra\_ d1nupa\_ d3l92a\_ d1f9aa\_  
d1qjca\_ d2h29a\_ d1vlha\_ d1od6a\_ d1lw7a1 d1mrza2 d4ruka\_ d2el7a\_  
d1iq0a2 d1irxa2 d1r6ta2 d1ivsa4 d2cyba\_ d1rqga2 d1j09a2 d2yxna\_  
d1f7ua2 d1h3fa1 d1ffya3 d2g36a1 d1nzja\_ d1jila\_ d1n3la\_ d1i6la\_  
d1pfva2 d1h3na3 d3n9ia\_ d3sz3a1 d3sw2a\_ d1moxc\_ d1dx5i3 d1edmb\_  
d1aut12 d1aut11 d1dva11 d1szba2 d1kigl\_ d2y5fl\_ d1ijqa2 d1gk5a\_  
d1g1sa2 d1nt0a3 d1xdtr\_ d1lmja2 d1lmja1 d1nzia2 d2wphe\_ d1klil\_  
d1pfx12 d1pfx11 d1p9ja\_ d1g1ta2 d1f7ea\_ d4yzub\_ d1nuba2 d2mgpa1  
d1b9wa1 d1b9wa2 d2mgpa2 d1ob1c1 d1ob1c2 d1n1ia2 d1n1ia1 d2npra2  
d2npra1 d2y5ia\_ d1psra\_ d3n22a\_ d2egda\_ d4ggfc\_ d2wcea\_ d2luca\_  
d4aqia\_ d3nsia\_ d2lp3a\_ d1j55a\_ d1a4pa\_ d1k8ua\_ d1nsha\_ d1pvaa\_  
d3fs7a\_ d2pvba\_ d1ttxa\_ d1rwya\_ d2kyfa\_ d1rk9a\_ d1a75a\_ d1exra\_  
d1tiza1 d1nyaa\_ d1g8ia\_ d1ggwa\_ d1wdcc\_ d3fwba\_ d1ggza\_ d2o5ga\_  
d1ctaa\_ d1m45a\_ d3i5gc\_ d1s18a\_ d1fpwa\_ d2scpa\_ d2roaa\_ d4aqra\_  
d3pn7b\_ d1br1b\_ d2mysb\_ d1s6ca\_ d1bjfa\_ d2obha\_ d1jfka\_ d1jf0a\_  
d1qv0a\_ d1lkja\_ d2mlfc\_ d2m97a\_ d2d8na\_ d4by5a\_ d1jbaa\_ d4nqga\_  
d1wdcb\_ d2mysc\_ d1j7qa\_ d1s6ia\_ d1uhka2 d1r2ua\_ d1dtla\_ d3kf9a\_  
d3pn7c\_ d1fi6a\_ d1c07a\_ d5d67d\_ d1tuza\_ d1h8ba\_ d1leg3a2 d2zkmx1  
d1snla\_ d1ylxa\_ d1hqva\_ d1dvia\_ d1df0a1 d1qxp2a\_ d4usla\_ d1k94a\_  
d1sfsa\_ d1jfxa\_ d1wkya2 d1uuqa\_ d3wh9a\_ d4mlra\_ d1xyza\_ d4xuya\_  
d2je8a5 d4bf7a1 d3cuia\_ d1ur4a\_ d1qw9a2 d1odza\_ d2vzsa5 d1bqca\_  
d2x2ya1 d1hjqa\_ d1qnra\_ d4y7ea1 d1vjza\_ d4k68a\_ d2v3ga\_ d4hpga\_  
d1nofa2 d1nq6a\_ d1h4pa\_ d1aq0a\_ d3ziza\_ d4bs0a\_ d1ecea\_ d1h1na\_  
d1ta3b\_ d1w91a2 d1i1wa\_ d1uhva2 d1us3a2 d1legza\_ d7a3ha\_ d1tvna1  
d3nyda1 d1ghsa\_ d2cyga1 d4xv0a\_ d2c8na2 d1w32a\_ d3emca\_ d1v6ya1  
d1foba\_ d2uwfa1 d2fgla\_ d3niya1 d2c0ha1 d1rh9a1 d1yq2a5 d1szna2  
d1fa2a\_ d1pama4 d5do8a1 d1ea9c3 d1hx0a2 d2fhfa5 d1qhoa4 d1avaa2  
d1m53a2 d4m8ua1 d2gjpa2 d1lwaha2 d4howa1 d1ktba2 d1j0ha3 d3vm5a1  
d2x1ia\_ d1wzaa2 d1uasa2 d2diea1 d1mxga2 d1ht6a2 d1eswa\_ d5cpsa\_  
d1ud2a2 d1zjaa1 d3gbea1 d1kwga2 d1wdpa\_ d1gcya2 d1g5aa2 d1hvxa2  
d3dhpa2 d2bhua3 d4do4a1 d3qgva1 d1e43a2 d1g94a2 d2d3na2 d1gjwa2  
d1gvia3 d1x1na1 d1r7aa2 d1tz7a1 d2x42a1 d1tr9a1 d3abza1 d4toqa\_  
d1wb0a1 d1w9pa1 d1eoka\_ d1itxa1 d1kfwa1 d1goia2 d1edqa2 d2gsja\_  
d1hjxa1 d1jnda1 d1vf8a1 d3wdpp1 d3wq5a\_ d1gnxa\_ d4gxpa\_ d4hz8a\_  
d1e4mm\_ d3aiua\_ d1wcca1 d1qvba\_ d3ahxa\_ d1v02a\_ d2dgaa\_ d1pbga\_  
d1vffa1 d1qoxa\_ d4ha4a\_ d1mixa2 d1e5wa2 d1j19a2 d1isna2 d2a16b2  
d3syxa1 d1mkea1 d2p8va\_ d1xoda1 d1i7aa\_ d1evha\_ d1qc6a\_ d2v76a\_  
d1wj1a1 d1aqca\_ d1qqga2 d1qqga1 d1ntva\_ d1n3ha\_ d4dbba\_ d3f0wa1

d1p3ra\_ d1wgua1 d2cy4a1 d3hqca\_ d1wvha1 d1xr0b1 d1wgqa1 d1v89a1  
d2coda1 d1zc3b\_ d1wg7a1 d1u5ea1 d1v61a1 d2coca1 d2ys1a1 d1v5pa1  
d1ntya2 d1wjma1 d1wi1a1 d1u29a\_ d1xx0a1 d1unqa\_ d2zkmx3 d1fhoa\_  
d1v88a1 d2adza1 d1x1fa1 d1p6sa\_ d2coaa1 d1v5ma1 d1faoa\_ d2x18a\_  
d1dyna\_ d1x1ga1 d4kaxb\_ d2j59m1 d1ki1b2 d1xcga2 d1txda2 d1u5da1  
d1dbha2 d1w1ha\_ d1upqa\_ d1v5ua1 d1foea2 d2fj1a1 d1eaza\_ d2dfka2  
d2cofa1 d1kz7a2 d1zsqal d1r55a1 d3gboa\_ d1atla\_ d1kufa\_ d1buda\_  
d4q11a\_ d1quaa\_ d1yp1a\_ d1wnia\_ d3u1ra1 d1g9ka2 d1kapp2 d1k7ia2  
d1t3ca\_ d1epwa3 d2a97a\_ d3fiea\_ g1e1h.1 d3ioqa\_ d1fh0a\_ d1o0ea\_  
d1khqa\_ d1m6da\_ d2cb5a\_ g8pch.1 d1s4va\_ d2pnsa\_ d1vsna1 d1mira\_  
d1iwda\_ d2oula\_ d7pcka\_ d3bwka\_ d3bcna\_ d2p86a\_ d1pvja\_ d1pcia\_  
d1gece\_ d1deua\_ d4bs6a\_ d1xkga1 d1cqda\_ d1jqpa2 d2c0ya\_ d2bdza\_  
d3p5ua\_ d2o36a\_ d2jk6a2 d2jk6a1 d1feca1 d1feca2 d1lpfa1 d1lpfa2  
d1xhca1 d1xhca2 d1dx1a2 d1dx1a1 d1gera2 d1m6ia2 d1onfa1 d1onfa2  
d3lada2 d3lada1 d1w4xa1 d1w4xa2 d1gesa2 d1mo9a1 d1xdia1 d1fl2a2  
d1fl2a1 d1fcda1 d1fcda2 d1h6va2 d1h6va1 d1mo9a2 d1gv4a2 d1gv4a1  
d2gv8a2 d2gv8a1 d1aoga1 d1aoga2 d1hyua1 d1ebda1 d1ebda2 d3dk9a1  
d1q1ra2 d1q1ra1 d1gesa1 d1zbfal d2z1ha\_ d2etja1 d3qioa1 d1j11a\_  
d2e41a\_ d1j12a\_ d21sna1 d1io2a\_ d1uaxa\_ d2yv0x\_ d1mu2a1 d1lekea\_  
d1i39a\_ d1ps9a2 d1o94a2 d1lqta1 d1pn0a1 d1reoa1 d1ju2a1 d2f5va1  
d3c96a1 d2gmha1 d1pj5a2 d1gpea1 d1o5wa1 d1n4wa1 d1k0ia1 d2dw4a2  
d2ivda1 d1seza1 d2voua1 d1kdga1 d1s5ja1 d2hbja2 d2igia\_ d1wlja\_  
d1qhta1 d4dlea1 d1tgoa1 d2f96a1 d3tr8a1 d3mxma\_ d1q8ia1 d1y97a1  
d1w0ha\_ d1kfsa1 d2py5a1 d1noya\_ d1yt3a3 d2guia\_ d3mwpa1 d4kb1a\_  
d2d5ra1 d1b9ra\_ d1offa\_ d1frra\_ d3wcqa\_ d1e9ma\_ d1l5pa\_ d1wria\_  
d1i7ha\_ d3av8a\_ d1czpa\_ d1rfka\_ d3p1ma1 d3b2ga\_ d2bt6a2 d3nvva1  
d1krha3 d2h88b1 d1n62a2 d1t3qa2 d1zoyb1 d1jq4a\_ d1ffva2 d1dgja2  
d1rm6c2 d1faaa\_ d1wika1 d1xfla\_ d1ttza1 d2f51a1 d1ti3a\_ d1nhoa\_  
d1sena\_ d2i4aa\_ d1ep7a\_ d1zmaa1 d1fo5a\_ d3lefa1 d3diea1 d2yana1  
d1z6na1 d1oaza\_ d3zywa1 d4aj8a\_ d1nm3a1 d4fiwa\_ d1wmja\_ d4hs1a1  
d1iloa\_ d1xwaa1 d1wjka1 d2vm1a\_ d1fb6a\_ d1gh2a\_ d1h75a\_ d1nw2a\_  
d1kx5b\_ d3a6na\_ d4m6ba2 d2nqbd\_ d3wkjd\_ d2yfwe\_ d4h9na\_ d5bnxa\_  
d1kx5c\_ d3r45a\_ d1eqzb\_ d4jjnb\_ d1f66c\_ d1eqza\_ d4wnnb\_ d1kx5a\_  
d1u35c1 d1id3a\_ d2nqbc\_ d1kx5d\_ d1f1ea\_ d1b67a\_ d1pd212 d1nhya2  
d2a2ra2 d1k0dd2 d1f2ea2 d1gsua2 d1f3ba2 d2fhea2 d2pvqa1 d1tw9a2  
d1oyja2 d1e6ba2 d1k0ma2 d3ik7a1 d4is0a1 d1r5aa2 d1jlva2 d1m0ua2  
d3gtub2 d1z9ha2 d1okta2 d1axda2 d2gsra2 d1tu7a2 d1k3ya2 d1zgm1  
d1gnwa2 d1gwca2 d2gsta2 d1glqa2 d1oe8a2 d1pn9a2 d1v2aa2 d1fw1a2  
d1duga2 d3h3no1 d3h3no2 d3ezwa2 d1gd6a\_ d1f6ra\_ d1livma\_ d2gv0a\_  
d1iiza\_ d2z2fa\_ d1j8xa\_ d1gh1a\_ d1b9oa\_ d1741a\_ d1691a\_ d2o4wa\_  
d1p37a\_ d1k28a3 d1xjta1 d1jtma\_ d2f2qa\_ d4e97a1 d1g4ma1 d1g4ma2  
d1mpya2 d1kw3b2 d1kw3b1 d4ghga1 d1tfza1 d3isqa1 d3isqa2 d1sqia1  
d1sqia2 d1lkda2 d1lkda1 d1mpya1 d1cjxa2 d1cjxa1 d1sp9b2 d1t47a1  
d1t47a2 d1sp8a1 d1sp8a2 d1flua1 d1s5ja2 d1qhta2 d4dlea2 d1tgoa2

d3py8a2 d1q8ia2 d1kfsa2 d2py5a2 d1d5aa2 d1qsta\_ d2beia1 d4m3sa\_  
d1u6ma1 d1ygha\_ d1yk3a1 d3dr6a\_ d1xmta\_ d1z4ea1 d2ge3a1 d1bo4a\_  
d2fiaa1 d2jdca1 d1y9wa1 d3to7a\_ d1lwza1 d2fl4a1 d2ozua1 d2b5ga\_  
d2cy2a1 d2p0wa\_ d1cm0a\_ d4pswa\_ d1yrea1 d1yr0a1 d1m4ia\_ d2gana1  
d1yvka1 d1ghea\_ d2g3aa1 d1y7ra1 d2euia1 d1q2ya\_ d2fsra1 d1xeba\_  
d2ae6a1 d1cjwa\_ d1qsma\_ d2aj6a1 d1y9ka1 d1i12a\_ d1vkca\_ d2atra1  
d1n71a\_ d2d4pa1 d2fiwa1 d2fe7a1 d1tiqa1 d2ou2a\_ d1yx0a1 d2fcka1  
d2j8ma\_ d2pq8a\_ d1z4ra1 d1s3za1 d1ufha\_ d2hqya1 d2hqya2 d1ne9a1  
d1lrza3 d1ne9a2 d1xvqa1 d1pn0a2 d3hy2a\_ d2cvba1 d1o8xa\_ d1lu4a\_  
d1we0a1 d2bmxa1 d2a4va1 d1psqa\_ d1xiya1 d1q98a\_ d1n8ja\_ d1zofa1  
d2ggta\_ d3tjja\_ d4je1a1 d1o73a\_ d3s9fa\_ d2zcta\_ d1qmva\_ d1jfua\_  
d2b1ka\_ d5dvba1 d2b5xa1 d2v2ga\_ d1st9a\_ d3tb2a\_ d4llra\_ d4fh8a1  
d1e2ya\_ d1knga\_ d2h30a\_ d1i5ga\_ d2z9sa\_ d2f8aa1 d1tp9a1 d2b7ka\_  
d1nm3a2 d3hvva\_ d2wfca1 d4kcea\_ d1xvwa1 d4gqca1 d3qpma\_ d4k1fa\_  
d1zzoa1 d1gp1a\_ d1prxa\_ d4od7a1 d1z6ma1 d4mcua1 d4dvca1 d1r4wa\_  
d3l9sa\_ d3rppa\_ d2qked\_ d4ksoa\_ d1t4za1 d1wwja\_ d2m5ta\_ d1wqsa\_  
d5bpea\_ d2ipha\_ d1lvoa\_ d2bhga1 d3tnta\_ d3sjia\_ d3d23a1 d2fyqa\_  
d3tloa\_ d3zvea1 d2hrva\_ d3q3ya1 d4asha1 d1e88a1 d1l6ja5 d1l6ja4  
d1eaka4 d1eaka3 d1l6ja3 d1h8pa2 d1ys1x\_ d4hs9a\_ d1ispa\_ d1ex9a\_  
d1ku0a\_ d3qmma\_ d1n9wa1 d1bbua1 d1e1oa1 d1b8aa1 d1l0wa1 d3a74a1  
d1eova1 d1ra6a\_ d1muka\_ d3gsza\_ d1khva\_ d1te9a\_ d2xwha\_ d3uqsa\_  
d3hkwa\_ d3n6ma\_ d2cjqa\_ d2xyma\_ d1teba\_ d1te8a\_ d1s48a\_ d1u09a1  
d4wfxa\_ d3tyqa\_ d2pgga1 d1lgya\_ d4l3wa\_ d1llfa\_ d1gz7a\_ d1ukca\_  
d4wfia\_ d4cg1a1 d3visa\_ d1lixra2 d1svpa\_ d1mbma\_ d3su6a1 d1cu1a1  
d4agka\_ d1vcpa\_ d1q31a\_ g1n11.1 d3e90b\_ d1ep5a\_ d3u1jb\_ d2ddfa\_  
d3zxha\_ d1cg1a\_ d1rm8a\_ d1eaka2 d1hy7a\_ d2jsda\_ d1cxva\_ d1hv5a\_  
d1i76a\_ d3p0ya1 d1igra1 d1igra2 d1n8yc2 d1m6ba2 d1m6ba1 d1dzka\_  
d4tlja\_ d2a2ua\_ d4wfva\_ d3t1da\_ d4iaxa\_ d3zq3a\_ d2nnda\_ d1i4ua\_  
d1kxoa\_ d1bbpa\_ d1kt7a\_ d1exsa\_ d3s26a1 d1lf7a\_ d4gh7a\_ d1z24a1  
d1qabe\_ d1xkia\_ d1ew3a\_ d3bx7a\_ d4iawa1 d1n0sa\_ d1gkab\_ d3kzaa\_  
d2k23a\_ d2l9ca1 d2joza1 d1gm6a\_ d3kffa\_ d3saoa1 d1e5pa\_ d1yupa1  
d1iiua\_ d2tbvc\_ d1c8nc\_ d1x36a\_ d1smvc\_ d1ng0c\_ d4sbvc\_ d1lopa\_  
d1f2nc\_ d1ddla\_ d1e57b\_ d1auyb\_ d1rmka\_ d1ixta\_ d1eyoa\_ d1cnna\_  
d1fu3a\_ d1g1pa\_ d1f3ka\_ d1fyga\_ g1f8v.1 d1novc\_ d1ny721 d1ny722  
d1a6ca2 d1a6ca1 d1pgl22 d1pgl21 d1pgl11 d1ny711 d1mqta\_ d1d4m3\_  
d1fmd3\_ d2mev1\_ g1aym.1 d1ev13\_ d4q4w1\_ d1r1a3\_ d2x5ia\_ d1rhi1\_  
g1r1a.1 g1d4m.1 g1rhi.1 d1b35b\_ d1loopa\_ d1tme1\_ d4iv1a\_ g1pvc.1  
g1fpn.1 d1fpn1\_ d4gb31\_ d1d4m1\_ d1fmd1\_ d1ev11\_ d2wzr3\_ d1qqp3\_  
g1fmd.1 d2x5ic\_ d1rhi3\_ g1oop.1 d1hxs1\_ g1hxs.1 d1fpn3\_ d1bev1\_  
g2mev.1 d1eah3\_ d1aym1\_ d1pvc3\_ d1qqp1\_ d1zba3\_ d1h8ta\_ d3vbhc\_  
g1b35.1 g1bev.1 d1hxs3\_ g1ev1.1 d1bev3\_ g1tmf.1 d1tmf1\_ d1b35a\_  
d2mev3\_ g1eah.1 g1h8t.1 d1eah1\_ d4q4w3\_ d1r1a1\_ d1aym3\_ d1pvc1\_  
d1zba1\_ d1h8tc\_ d1loopc\_ d1tme3\_ g1qqp.1 d4iv1c\_ g1tme.1 d3ubub\_  
d1legia\_ d1qo3c\_ d1v7pa\_ d1tdqb\_ d3ubua\_ d1c3ab\_ d1h8ua\_ d3bx4b\_

d1t8ca1 d1sb2a1 d1qdda\_ d2ziba1 d3cada\_ d1byfa\_ d1j34b\_ d1jwia\_  
d1jzna\_ d1c3aa\_ d1oz7b\_ d1wmza\_ d3bdwb\_ d1hq8a\_ d1fifa1 d1dv8a\_  
d3hupa\_ d1wk1a1 d1umra\_ d2afpa\_ d3bx4a\_ d1gz2a\_ d1sl6a\_ d1v7pb\_  
d3g8ka\_ d1ixxa\_ d1j34a\_ d1jwib\_ d1g1sa1 d1y17a1 d1ja3a\_ d1fvub\_  
d3bdwa\_ d1sb2b1 d1fvua\_ d1umrc\_ d1oz7a\_ d4m17a\_ d3cfwa1 d1ypqa1  
d1g1ta1 d3fd4a\_ d3l9jc\_ d4dn8a1 d1v41b\_ d1rd11\_ d2msba\_ d1eixa\_  
d3exra\_ d2ffca1 d2fdsa1 d3n3ma1 d2czda\_ d1q6oa\_ d2yyua\_ d1vqta1  
d3ldva1 d1ux8a\_ d1dlya\_ d4i0va\_ d2bkma\_ d1dlwa\_ d2bmma\_ d2r80b\_  
d1cqxa1 d1cg5a\_ d1gcvb\_ d3boma\_ d2h8fb\_ d2raoa\_ d3bj1a\_ d4hrrb\_  
d2r50a\_ d3d1kb\_ d2aa1b1 d3zhwa\_ d3hf4b\_ d3gdja\_ d1jebb\_ d3bj1b\_  
d1x9fb\_ d1wmub\_ d1gcva\_ d3bcqb\_ d3d4xb\_ d2dc3a\_ d3hf4a\_ d4yu3a\_  
d3k8ba\_ d1qpwb\_ d2r80a\_ d3bcqa\_ d1v4wa\_ d3wtgb\_ d1j17a\_ d4esaa\_  
d1a9we\_ d3d1ab\_ d1fsla\_ d4h21a\_ d1v4wb\_ d1mwca\_ d1vhba\_ d1jeba\_  
d1spgb\_ d1h97a\_ d1q1fa\_ d1tu9a1 d3d1aa\_ d1hdsb\_ d3hyub\_ d2zfbf\_  
d3fs4a\_ d1oj6a\_ d1shrb\_ d4h21b\_ d4yu3b\_ d1spga\_ d3hrwa\_ d3qqra\_  
d3at5a\_ d4wchd\_ d3hyua\_ d1cg5b\_ d1uc3a\_ d1hbra\_ d2raob\_ d1outb\_  
d4esab\_ d3gdjb\_ d3qqqa\_ d1x9fc\_ d3vrfa\_ d1itha\_ d3mkba\_ d3d4xa\_  
d3mjpa\_ d1j16a\_ d3fh9a\_ d1outa\_ d2dc3b\_ d1it2a\_ d3eoka\_ d3g46a\_  
d1qpwa\_ d3vrfb\_ d1ch4a\_ d1x9fd\_ d1hdsa\_ d2zfbf\_ d3mkbb\_ d1or4a\_  
d3wtga\_ d1a4fa\_ d3fh9b\_ d3bomb\_ d3cy5a\_ d3at5b\_ d1x9fa\_ d2oifa\_  
d4lmbx\_ d1cpcb\_ d3v57a\_ d1kn1a\_ d1cpca\_ d4f0ta\_ d2vjha\_ d4po5b\_  
d1eyxa\_ d1alla\_ d4f0tb\_ d1b33b\_ d1b8db\_ d4h0mb\_ d1b33a\_ d2vjhb\_  
d4l6b\_ d2vmlb\_ d1allb\_ d2vjta\_ d3dbja\_ d2vmla\_ d2vjtb\_ d4f0ub\_  
d1f99b\_ d4rmpa1 d1liaa\_ d1eyxb\_ d2uulb\_ d4lmsb\_ d4f0ua\_ d2bv8a\_  
d1f99a\_ d2bv8b\_ d2c71b\_ d3dbjb\_ d4rmpb1 d1b8da\_ d4h0ma\_ d3v57b\_  
d1kn1b\_ d1liab\_ d2uula\_ d2j96a\_ d4dv8a2 d1j7na1 d3ia2a\_ d4dgqa1  
d1hkha\_ d1zoia\_ g1gxs.1 g1wht.1 d2xqfa\_ d1ea5a\_ d1f6wa\_ d1qe3a\_  
d1k4ya\_ d4qwwa\_ d2ha2a\_ d1sfra\_ d1f0na\_ d4qeka\_ d1g19b1 d1gkub1  
d2qvba\_ d2v9za\_ d4kafa1 d1jmx4 d1pbya3 d1pbya4 d4iuaa3 d4bvva\_  
d5hpga\_ d3k65a\_ d1ki0a3 d1ki0a2 d1ki0a1 d1a0ha1 d1pmla\_ d3sp8a3  
d2feba1 d1mdwa\_ d1qxp4 d1ziva1 d1zcm1 d1f74a\_ d3l21a\_ d2e1da\_  
d1to3a1 d1w3ia\_ d1sfla\_ d1n7ka\_ d1vcva1 d4imea\_ d1wa3a\_ d2ocza1  
d1f2ja\_ d3m16a\_ d2yxga\_ d1ub3a\_ d3a5fa\_ d1fbaa\_ d1l6wa\_ d1xfba1  
d1wx0a1 d1vpxa1 d1ojxa\_ d1mxsa\_ d2a4aa1 d1xkya1 d3cq0a1 d3s1xa\_  
d1f05a\_ d1fdja\_ d3cpra1 d4d2ja\_ d1cg2a1 d1yloa2 d1y7ea2 d1y0ya3  
d1lfwa1 d1vixa1 d1vhoo2 d1ysja1 d1vhea2 d1z21a1 d2fvga2 d1vgya1  
d1r3na1 d2grea2 d1xmba1 g1q71.1 d1rtqa\_ d3rp2a\_ g1lucy.1 d1fuja\_  
d2zchp\_ d3w94a\_ d1si5h\_ d1lo6a\_ g2pka.1 d1cgha\_ d1kigh\_ d1a5ia\_  
d3s9ba\_ d1hj8a\_ d1ao5a\_ d2anya\_ d1q3xa1 d1gvza\_ d1azza\_ d4gsoa\_  
d2f91a1 d1iaua\_ d1gdna\_ d1eufa\_ g1fiw.1 d1eq9a\_ d4nfea\_ d2rdla\_  
d1spja\_ d1elva1 d1a7sa\_ d1ekbb\_ d1pfxc\_ d1yc0a\_ d2aiqa\_ g1fiz.1  
d4k60a\_ d4dgja\_ d1mzaa\_ d1op0a\_ d3tjva\_ d1pytd\_ d1sgfg\_ g1gg6.1  
d2eeka\_ g1rtf.1 d1a0ja\_ d3g01a\_ d1pytc\_ d4e7na\_ d1ddja\_ d1z8ga1  
d2hlca\_ d1npma\_ d1brup\_ g1jou.1 d1sgfa\_ d1autc\_ g2hnt.1 g1kdq.1

d1orfa\_ d3s69a\_ d4crga\_ d1fxya\_ d1bqya\_ d2ftba\_ d1pmpa\_ d2rcqa1  
d1fdqa\_ d4lkpa\_ d1sa8a\_ d1vyfa\_ d1lpja\_ d3vg7a1 d4azqa1 d5bvqa\_  
d1p6pa\_ d2qo4a\_ d1opba\_ d1yiva1 d1o1va\_ d4bvma1 d4tkba\_ d4i3ba\_  
d1bwya\_ d1ftpa\_ d1ggla\_ d4gkca\_ d1cbia\_ d3p6da1 d1kqwa\_ d2a0aa1  
d1m4la\_ d2bk7a\_ d3fjua\_ d1z5ra1 d1kwma1 d1jqga1 d2c1ca1 d1tda\_  
d1h8la2 d3lgia\_ d3i77a\_ d2z9ia2 d4nsva\_ d1lcya2 d4jcna\_ d1agja\_  
d1os8a\_ d1hpga\_ d1p3ca\_ d1l1ja\_ d1e69a\_ d1mv5a\_ d3g60a4 gl1i8.1  
d1ewqa2 d1ji0a\_ d1qhla\_ d1v43a3 d2wmfa1 d1vpla\_ d1g2912 d4a82a2  
g1f2t.1 d2d62a1 d3tuic1 d2bbsa1 d3g60a3 d2ixea\_ d1g6ha\_ d1sgwa1  
d2qi9c\_ d3rlfa1 d3b60a1 d3d31a2 d2pzea1 g1xew.1 d1jj7a\_ d1oxxk2  
d2onka1 d1wlwa\_ d1iwea\_ d1qf5a\_ d1vmaa2 d1nija1 d1np6a\_ d2p67a1  
d3ihla\_ d1lsl1a2 d1slma2 d1liona\_ d2v40a\_ d1dj3a\_ d3hida\_ d2vo1a1  
d2g0ta1 d1vcoa2 d1j8mf2 d1g3qa\_ d1xjca\_ d1p9ba\_ d1qzxa3 d1ihua2  
d1ihua1 d2qm8a\_ d1dj2a\_ d4ioja\_ d1cp2a\_ d1yrba2 d1hyqa\_ d3gqba2  
d1skye3 d1xp8a1 d1tf7a2 d1tf7a1 d1ye8a1 d1skyb3 d2qe7d2 d4blta\_  
d4huta\_ d3ldaa2 d4hyya\_ d2i3ba1 d1cr1a\_ d3j9tb2 d3ntua2 d1vdza1  
d2z43a\_ d1e9ra\_ d1nlfa\_ d3ziaa2 d1n0wa\_ d1g6oa\_ d3ziad2 d3j9ta2  
d1pzna2 d3gqbb2 d2i49a\_ d1nnfa\_ d1xvxa\_ d1ursa\_ d1h3da1 d1iuda\_  
d4mlva1 d1twya\_ d3e13x\_ d2nxoa1 d4pfua\_ d3ttma\_ d1elja\_ d2qmwa1  
d1us5a\_ d1y3na1 d1jeta\_ d1uqwa\_ d4f19a1 d2esna2 d3thia\_ d3fasa1  
d2uyeb\_ d2xwva1 d1r9la\_ d2fyia1 d1pb7a\_ d2ozza1 d1sw5a\_ d1nh8a1  
d1vr5a1 d2g29a\_ d1xs5a\_ d3lswa\_ d2z23a\_ d3w9va\_ d3tcha\_ d1q35a\_  
d1z7me1 d3q27a\_ d1p99a\_ d1ve4a1 d2i6ea1 d4mcoa1 d4n8ya\_ d1eu8a\_  
d1zbma1 d1hsla\_ d1ixca2 d1j1na\_ d1xvya\_ d1y9ua\_ d2z22a1 d1xoca1  
d4oera\_ d1wdna\_ d5f1qa1 d1xt8a1 d1i6aa\_ d4gwoa\_ d4igta1 d1pc3a\_  
d4mmpa1 d1o63a\_ d2czla1 d2onsa2 d4mija1 d1eh3a\_ d3skpa\_ d1dtza1  
d1ieja\_ d1jnfa2 d1ce2a1 d1jnfa1 d1b1xa2 d1b1xa1 d1jw1a1 d1jw1a2  
d1ryoa\_ d1h76a1 d1h76a2 d3q3ma\_ d1za0a1 d1mxra\_ d2inca\_ d1jk0a\_  
d2incb\_ d1mhyb\_ d3hf1b\_ d1mtyb\_ d1r2fa\_ d2uw1a\_ d1mhyd\_ d3n37a\_  
d1afra\_ d1syya\_ d1mtyd\_ d2o1za\_ d1uzra\_ d1smsa\_ d2fkza\_ d1zuja1  
d1s3qa1 d2fjca1 d1z6om1 d1veia\_ d4dyya\_ d1jiga\_ d3gvya\_ d2pyba\_  
d4cy9a1 d3bvfa1 d1r03a\_ d2cf7a\_ d1nf4a\_ d1zs3a1 d4iwka\_ d3ka8a\_  
d3np0x\_ d1n1qa\_ d1l1b3a\_ d4e6ka\_ d1z6oa1 d2fzfa1 d4dyua\_ d3ge4a\_  
d1jgca\_ d4am4a\_ d2z6ma\_ d1ji5a\_ d1vlga\_ d1lkoa1 d1krqa\_ d3qz3a\_  
d1o9ra\_ d2ffxj\_ d1euma\_ d1yv1a1 d2v2pa\_ d1j30a\_ d4di0a\_ d1dpsa\_  
d2cbia2 d1gqia1 d2choa2 d1oewa\_ d2qzxa\_ d2asia\_ d1psoe\_ d1miqa\_  
d2h6ta\_ d1pfza\_ d1izda\_ d3hd8a\_ d1j71a\_ d1dpja\_ d4aa9a\_ d1t6ex\_  
g1b5f.1 g1lya.1 g1htr.1 d1qdma2 d1bxoa\_ d1wkra\_ d1tzsa\_ d1libqa\_  
d2qzwa\_ d1bdqa\_ d3ggta\_ d3ixoa\_ d1mrxa\_ d2haha\_ d1tw7a\_ d4njsa\_  
d1sgua\_ d2p3da\_ d1nsoa\_ d3d3ta\_ d2rkfa\_ d1c6ya\_ d2rspa\_ d3ogpa\_  
d3ekwa\_ d2o4na\_ d2j9ja\_ d3ggua\_ d3lzua\_ d4npua\_ d4j55a\_ d2r8na\_  
d2fxda\_ d2p3ca\_ d4dqea\_ d3ttpa\_ d3t3ca\_ d2p3aa\_ d2hc0a\_ d2fdda\_  
d3mwsa\_ d1js3a\_ d3rcha\_ d3k40a\_ d1k8rb\_ d1wgra1 d1ef5a\_ d1wfyal  
d1e8ya3 d1wgya1 d2cs4a1 d1wxma1 d2byeal d3kh0a1 d2byfal d1wxaa1

d1e7ua3 d1h4ra3 d4yl8a1 d2a16a3 d1wgdal d1wggal d4q5eb\_ d1wjnal  
d1se9a\_ d3n3kb\_ d1wz0a1 d1we6a1 d2m0xa\_ d2gbka\_ d3rt3b1 d1wh3a1  
d1sifa\_ d2ekek2 d4ii2b1 d4hk2a1 d1c3ta\_ d1wgha1 d1ttna1 d1j8ca\_  
d1wx8a1 d3v6cb1 d2ma9b\_ d4i61b1 d1bt0a\_ d2jvca1 d1iyfa\_ d2k1fa\_  
d1wxva1 d1wf9a1 d1t0ya\_ d2io0b2 d1x1ma1 d2gbma\_ d1zw7a1 d2m17a\_  
d1ud7a\_ d1we7a1 d2lwpa\_ d2gbja\_ d1wjua1 d1v6ea1 d1v86a1 d4eewa\_  
d1wiaa1 d4icva\_ d4gu2a\_ d1wx7a1 d1wy8a1 d4hjka1 d2faza1 d1v5oa1  
d3ubra\_ d1qo8a1 d1d4ca1 d2k3va\_ d1ft5a\_ d1qdba\_ d1m1qa\_ d2j7aa\_  
d1h21a\_ d1ogyb\_ d4fasa\_ d1oaha\_ d1sp3a\_ d4lu0a\_ d1of8a\_ d3unda1  
d3e9aa1 d1vr6a2 d2qkfa\_ d1d9ea\_ d1o60a\_ d2h0ba\_ d2erfa\_ d1h30a2  
d3mw4a1 d1pz7a\_ d2r1ba\_ d3v64a1 d1d2sa\_ d3bopa1 d3mw3a1 d1okqa1  
d1okqa2 d1wioa4 d1ccza2 d1dr9a2 d1ic1a1 d2d9qb1 d2nxyb2 d1um8a\_  
d1qvra2 d1qvra3 d1qzma\_ d1sxjc2 d1jr3d2 d2p65a\_ d1l8qa2 d1g8pa\_  
d3hu3a3 d1sxjd2 d1njfa\_ d1in4a2 d1sxja2 d1tuea1 d2ce7a2 d1w5sa2  
d1sxjb2 d1d2na\_ d1ny5a2 d1ofha\_ d2gnoa2 d2a5yb3 d1fnna2 d1u0ja1  
d1lv7a\_ d1iqpa2 d2fnaa2 d1ixsb2 d4gita\_ d1sxje2 d1g41a\_ d2e3fa\_  
d1mm0a\_ d2e3ea\_ d21lda\_ d2ny8x\_ d2e3ga\_ d2ny9x\_ d2nz3a\_ d21j7a\_  
d1n4na\_ d2m8bb1 d2kyqa\_ d3psma\_ d1jxca\_ d2g11a\_ d1ugla\_ d4uj0a\_  
d2k4ua\_ d1hp2a\_ d21u9a\_ d1baha\_ d2meoa1 d1wm7a\_ d1hlya\_ d1n8ma\_  
d1jlza\_ d1wpda\_ d1c55a\_ d1pvza\_ d1wt7a\_ d1rjia\_ d1wz5a\_ d1m2sa\_  
d1pjva\_ d1c49a\_ d1qkya\_ d2ktca1 d1wmta\_ d1du9a\_ d1j5ja\_ d1rlga\_  
d1t0za\_ d2i61a\_ d1t1ta\_ d1sn4a\_ d1kv0a\_ d2lkba\_ d1wwna\_ d1pe4a\_  
d2kbbka\_ d2li7a\_ d1djta\_ d2kbha\_ d1dq7a\_ d1sega\_ d1omya\_ d1zywa1  
d1jzaa\_ d2jca\_ d1bnla\_ d1dy2a\_ d1t61c1 d1iyjb4 d1iyjb5 d1iyjb3  
d1o7ia\_ d4ipca1 d1x3ea\_ d4apva\_ d1jb7a1 d1jb7a2 d1jb7a3 d3kdfa\_  
d1uelb\_ d1wjja1 d3eiva\_ d1xjva2 d1xjva1 d2ccza2 d1se8a\_ d1l1oc\_  
d1jb7b\_ d1qvca\_ d1qzga\_ d1miua4 d1miua5 d1miua3 d3g48a1 d1gd7a\_  
d1mkha\_ d1pyba\_ d1y14b1 d2nn6i1 d1i941\_ d2zjra2 d1smxa\_ d2qamc2  
d1hh2p1 d2r7da1 d1rl2a2 d1wfga1 d3bzka4 d1x6oa2 d3a0ja\_ d2j01d2  
d2ja9a1 d4q15a\_ d1luza\_ d2n3sa\_ d2vnud1 d1h95a\_ d1go3e1 d2nn6h1  
d1ne3a\_ d2mola\_ d1liz6a2 d1jjga\_ d1e3pa2 d2ix0a3 d2ix0a2 d2lxja\_  
d1ueba3 d1ueba2 d2z0sa1 d1u0la1 d2ix0a1 d2eifa2 d2je6i1 d3i2za1  
d2c35b1 d2ahob2 d1t9ha1 d3i4oa\_ d2qall1 d1jt8a\_ d2nn6g1 d1g6pa\_  
d3cama\_ d1i94q\_ d1c9oa\_ d1d7qa\_ d2ba0a1 d2vnud2 d2vnud3 d1khia2  
d2qalq1 d1wi5a1 d1xta2 d1ny4a\_ d1pfsa\_ d2a1ka\_ d1rpma\_ d2shpa1  
d1yfoa\_ d1l8ka\_ d2ooqa1 d1g4us2 d1p15a\_ d1lara2 d1lara1 d1wcha\_  
d2fh7a2 d2fh7a1 d1ohea1 d2f4da\_ d1rxda\_ d2hxpa\_ d1xria\_ d1d5ra2  
d1fpza\_ d3ezza\_ d4y2ea\_ d1i9sa\_ d1c11a\_ d4lbqa\_ d1a78a\_ d1slta\_  
d4no4a\_ d3zsja\_ d3duia\_ d1g86a\_ d1qmja\_ d1hlca\_ g1qmo.1 g1len.1  
d3zyra\_ d1n47a\_ g21tn.1 d1avba\_ d3usua\_ d1dhkb\_ d1f9ka\_ d1ukga\_  
d1g8wa\_ d1g9fa\_ d1wbfa\_ d3wcsa\_ d1g7ya\_ g1loe.1 d1mvqa\_ d1hq1a\_  
d1v6ia\_ d1dbna\_ d1qnwa\_ d1fx5a\_ d4l8qa\_ d1ioaa\_ d3n35a\_ d1epwa1  
d3h33a\_ d1rwja\_ d19hca\_ d1os6a\_ d3bxua\_ d3h4na\_ d1i77a\_ d3caoa\_  
d1j0pa\_ d2ctha\_ d1ofwa\_ d2e84a\_ d1hh5a\_ d1gyoa\_ d3h34a\_ d1dszb\_

d1a6ya\_ d3cbba\_ d1ynwa1 d1r4ia\_ d1hcqa\_ d2hana\_ d2hanb\_ d2enva1  
d1kb4b\_ d2n1lb\_ d1cita\_ d2dara2 d2dara1 d1wyha2 d2dloa2 d1rutx4  
d1rutx3 d2cuqa2 d1x4la2 d1x4la1 d1x3ha2 d1x3ha1 d2d8za1 d1x61a2  
d1x6aa1 d1x6aa2 d2cora2 d2cora1 d1v6ga1 d1v6ga2 d2d8za2 d1x64a1  
d1x64a2 d1b8ta1 d2co8a1 d1x63a2 d2dj7a2 d2dj7a1 d2cu8a2 d2cu8a1  
d1g47a1 d1j2oa1 d1wyha1 d2dloa1 d1wiga1 d1wiga2 d2cupa2 d2cupa3  
d1x68a1 d2d8ya2 d2d8ya1 d1m3va2 d1x62a1 d1x68a2 d1x61a1 d1b8ta3  
d1b8ta2 d2d8xa2 d2d8xa1 d1x4ka1 d1x4ka2 d2cuqa1 d1m3va1 d2co8a2  
d1j2oa2 d1x63a1 d2cura1 d2cura2 d1x62a2 d1op9a\_ d1y0la1 d1etzb1  
d1egj11 d2gsib1 d1nj9a1 d4jfhd1 d1aqk11 d1t2ja\_ d1lo4h1 d1zvyal  
d3v4v11 d4enec1 d1kxtb\_ d5e8ea1 d2pxya\_ d4weud\_ d1xiwc\_ d2esvd1  
d1qznh\_ d1ogae1 d1f4xh1 d4n1hb\_ d3ezjb1 d3mlw11 d1kfah1 d1etza1  
d1b4jh1 d3cfic\_ d4w68a\_ d2arja1 d1ek3a\_ d2ok011 d1vera\_ d1uwgh1  
d1blnb1 d1fpth1 d1rzga1 d2giya1 d4m3kb1 d1nc2a1 d2nyyd1 d1ncna\_  
d1fbih1 d5dxwa\_ d4fqqa1 d1dqdh1 d1jfq11 d1kelh1 d1faih1 d1frgl1  
d1fig11 d4m6n11 d1fo0a\_ d4hxb11 d3b5ga\_ d3quyd1 d2h9gb1 d1i8kb\_  
d2dd8h1 d2ck0h1 d1eaja\_ d4w6wb1 d2a6ib3 d1t66d1 d2e27h\_ d1ob1b1  
d1f11b1 d2v7na1 d1ad0a1 d2xt1b1 d1pskh1 d4i13b1 d2op411 d1a0q11  
d1uwell d1za3a1 d1ncb11 d4uu9a\_ d1bm3h1 d1cloh1 d1nqba2 d1cf8h1  
d4y5va\_ d1mhph1 d5anma1 d4cdgc1 d4ldeb\_ d1y0lb1 d2pcpb1 d1z3g11  
d1dfb11 d1fh5h1 d3g5xa1 d1tzib1 d4dn311 d3zhka1 d2b1hh1 d2uyla1  
d1f3dh1 d1nj9b1 d2agjh1 d2h1p11 d1q72h1 d8fabb1 d1ndmb1 d1rjca1  
d4u6hb1 d3upca\_ d2fbj11 d1osph1 d1tvda\_ d2cjev\_ d4fhbd1 d1bd2d1  
d1rz7h1 d3nn8a\_ d1blna1 d1knoa1 d1nfd1 d2bmkb1 d1dq11\_ d1igyb1  
d1igf11 d12e8h1 d3utza1 d1nc2b1 d1rihh1 d4mwfb1 d4jvpa1 d1mieh1  
d1rhfa1 d1fgn11 d1sbsh1 d1lp9e1 d1dn0a1 d4lqf11 d1iaih1 d1kgcd1  
d1mh5b1 d1gpol1 d2g60h3 d1f8t11 d2jixd1 d4grwh\_ d1fo0b\_ d1bfob1  
d1axsa1 d1u9ka\_ d1nmbh\_ d1h8na1 d1h8na2 d1jguh1 d4eura1 d3sdy11  
d35c8h1 d1w7211 d1mvub\_ d1i9rh1 d1ob1a1 d4wenb\_ d1yeeh1 d3ietc1  
d1f58h1 d1ad0b1 d1mqk1\_ d1nbvh1 d4b50a\_ d3r8bb\_ d1baf11 d1mamh1  
d4rgne1 d2gsgb\_ d35c811 d1bafh1 d1ai1h1 d2pcpa1 d2fath1 d2x1pa\_  
d1orsb1 d1ibg11 d1shma\_ d1a2yb\_ d1u0qa\_ d2coqa\_ d1hilb1 d1qfwi\_  
d1jv5b\_ d1fn4b1 d5e0qa\_ d1nsnh1 d1plg11 d4ocx11 d1kb5h1 d1rzfh1  
d1pg7x1 d2fx7h1 d2oi9c\_ d1l7il1 d3eyva1 d1d5il1 d4ffyl\_ d1tet11  
d1a6wh\_ d1lac6a\_ d3dvfa\_ d1nfde1 d1mimh1 d1ri8a1 d1jhlh\_ d3dura\_  
d1fskb1 d1f97a1 d3so3b1 d2ak4d1 d1lp9f1 d4z7wf1 d1l7th1 d4y5ya\_  
d4x7ec1 d1emth1 d1ikf11 d1nlbh1 d4uta11 d1bjma1 d1leapb1 d1u6ah1  
d2dtgd1 d1kj2b\_ d1xeda1 d1c1eh1 d1fgvh\_ d2bnub1 d2fb4h1 d2dtgb1  
d1ktrh\_ d1jpth1 d1qkz11 d4hepg\_ d2atpb1 d1flrh1 d2hrp11 d1mvfa\_  
d1iaim1 d3k80a1 d2jb5h1 d3zkxc\_ d4grwe\_ d1it9h1 d1rhhb1 d3w9ec\_  
d1e4wh1 d1sy6h1 d2j6eh1 d3qxta\_ d1jglh1 d1p7ka1 d1tzhb1 d4n8pa1  
d1gaf11 d2jelh1 d1wioa2 d4i0cc1 d1cicb1 d1lmka2 d1lmka1 d1iqwh1  
d1lorqb1 d1ejoh1 d1jnlh1 d4zga1\_ d43c9b\_ d1ggbl1 d1wejh1 d3q6fa1  
d1f3dj1 d3c61a1 d1bqlh1 d3p9wb\_ d1a3r11 d1h0db1 d2uzil\_ d1leo811



d1qfwl\_ d1n7m1l d1igja1 d1c5ch1 d2a9mh\_ d1rmfh1 d1fj1b1 d4heme\_  
d1ccza1 d1a5fh1 d1logad1 d1dlfh\_ d1qa9b\_ d1vgel1 d3qskb\_ d1sjxa\_  
d4ozfg1 d1sq2n\_ d1qd0a\_ d1kcvh1 d1c5db1 d3qcul1 d8faba1 d3bn9d1  
d1mjuh1 d4y8dc\_ d7fabh1 d3dvgb1 d1l0011 d1a6tb1 d1gigh1 d1kcrh1  
d2hwz1l d1yjdc1 d3clfl1 d4krna\_ d1d17l\_ d1e6o1l d1mexh1 d3r0ma\_  
d4kkna\_ d1fnsl1 d1oaqh\_ d1rzia1 d1lucbh1 d1ncw1l d4b41a\_ d1nfdfl  
d2mpah1 d2d7tl1 d4grwf\_ d4b5ea\_ d1lk3h1 d3u79a\_ d4u3xa\_ d1ghfl1  
d1bvkb\_ d1mcww1 d1b88a\_ d1jrhh1 d32c2b1 d4wemb\_ d1dsfh\_ d1op3h1  
d1cell1 d1iqda1 d1qoka1 d1qoka2 d1qfuh1 d2crya1 d1ay1h1 d1oaql\_  
d3ab0b\_ d1rur1l d1t4kb1 d1bz7b1 d1n0xh1 d1lucb1l d4w6yb\_ d43c9a\_  
d2aabl1 d1tzia1 d4n1ca\_ d1k6qh1 d3g9ab\_ d4tvsa1 d1ligmh\_ d1pz5b1  
d3dx9a1 d3wxwh\_ d1nakh1 d1kcul1 d3eaka\_ d4qlra1 d1cr9l1 d1d9ka\_  
d1f4x1l d1deea1 d2i27n2 d1c12a1 d2orb1l d1j8hd1 d1mcp1l d1c5da1  
d1kenh1 d1bd2e1 d1h5ba\_ d4x7fc1 d3upaa\_ d1t3fa1 d1indh1 d2dtgc1  
d4hc1l1 d1zv5a1 d4wgvb\_ d1uwgl1 d4f37k1 d1aqkh1 d1vesa\_ d3zkqd\_  
d1fpt1l d1l04l1 d1knob1 d3rrqa\_ d1ct8b1 d4orz\_ d1mlbb1 d4hgkc1  
d1dqdl1 d1bogb1 d4ozhe1 d1dr9a1 d1i7za1 d1dn0b1 d1kell1 d1rzi1l  
d1ypzf1 d1wtla\_ d1hkfa\_ d1fail1 d1figh1 d2vyre\_ d1sjva\_ d1ohqa\_  
d1bfoa1 d1pkqb1 d1mjul1 d1b4jl1 d1nsn1l d2arjb1 d1p4bh\_ d4aj0a\_  
d3nn8b\_ d2rcja1 d1f2xk\_ d4v1dd\_ d1adqh1 d2eksa\_ d4k3ga\_ d1jfqh1  
d1uweh1 d1frgh1 d4gftb\_ d1uz8b1 d4n1ea\_ d1bm3l1 d1cl0l1 d3mcka1  
d2vq1a1 d1ae6h1 d4aq1b1 d1uj3b1 d1nbqa1 d1fh5l1 d2ck0l1 d2ywza\_  
d1q72l1 d4nbxb\_ d1hila1 d4hz1b1 d2j88l1 d1zmya1 d1cd0a\_ d1a4ka1  
d1psk1l d1a0qh1 d4krmb\_ d1ncbh1 d2fbjh1 d1j8he1 d1i3ua\_ d1cf8l1  
d1fe8h1 d2p1ya1 d1eeqa\_ d2x89a\_ d1o10a\_ d2r0lh1 d1ub5a1 d1dfbh1  
d3eyvb1 d4jdvb1 d4p2cg\_ d2gsia1 d2agjl1 d1u3ha1 d2h1ph1 d1rih1l  
d1fskc1 d1boga1 d2a77l1 d1ospl1 d1qfoa\_ d3dwta\_ d2fx7l1 d1rz7l1  
d3stba1 d1pkqa1 d1b6da1 d1dzba2 d1dzba1 d1kj2a\_ d4l1ha\_ d1rzgb1  
d1dq1h\_ d12e8l1 d1miel1 d1jmaa\_ d1sbs1l d1fgnh1 d1f58l1 d1mqkh\_  
d1ndgb1 d3qegl1 d1iail1 d2aw2a1 d1tqbc1 d3fo2a1 d4dkaa\_ d1f8th1  
d2g60l1 d2ywya\_ d1uj3a1 d1yc7a\_ d3bd3a\_ d4w6xb1 d1nmb1\_ d1i8ka\_  
d1rjlb1 d1ypze1 d1p7kb1 d1kxqe\_ d1gpoh1 d2z4qa1 d1w72h1 d1i9rl1  
d4qgya1 d4xt1c\_ d2qqnh1 d1cica1 d3c08h1 d2cd0a\_ d2bdnh1 d1hnga1  
d1mam1l d1nldh1 d1cr9h1 d4lcih1 d3bkyl1 d3qg7l1 d1ai1l1 d1kxvc\_  
d4iosd\_ d1l7ih1 d2x1qa\_ d1ub6b1 d3k74b\_ d1libgh1 d1teth1 d1igya1  
d1hxma1 d2x6ma\_ d2e71a\_ d5e03a\_ d1qfwm\_ d2r0kh1 d1igjb1 d1rurh1  
d1plgh1 d1mj8h1 d1yuhb1 d3fmg1l d1rzzfl1 d1emt1l d1ad9b1 d1igtb1  
d1nlbl1 d1d5ih1 d3k7ua\_ d4ffyh\_ d1bwwa\_ d3dvga1 d1a6ta1 d1fgvl\_  
d4qxgl1 d1mim1l d1jh1l\_ d2hffb1 d2hh0l1 d1qkzh1 d1l7tl1 d1afvh1  
d1iaii1 d2cjuh\_ d1um5h1 d2ghwb2 d2ghwb1 d1kgce1 d2fgwh1 d1ikfh1  
d1dvfd\_ d2i24n1 d2xtjb\_ d1za3b1 d2yc1a\_ d2hh0h1 d2x1oa\_ d1bvka\_  
d1rjla1 d5e7ba1 d1igta1 d1il1b1 d2fb4l1 d1mvua\_ d1jpt1l d32c2a1  
d1fvca\_ d1iqdb1 d2hrph1 d2p4ab\_ d4qo1a\_ d1p2cb1 d1wt5c\_ d1t4ka1  
d5c1mb\_ d1it9l1 d1bz7a1 d1b2wh1 d1e4wl1 d1jnl1l1 d1yedb1 d1za6b1

d3u7aa\_ d1igfh1 d3gnml1 dlorsa1 dlwejl1 d1a2ya\_ dlhymb1 dlgafh1  
d2j4wh1 dlpz5a1 dlj05a\_ d1a3rh1 d4fqll1 dlqfwh\_ d1eo8h1 dln7mh1  
d4s11a\_ dlkegh1 d5da4a\_ d1iqwl1 d3whxb1 dlvgeh1 dldeeb1 d1c12b1  
d1t2ql1 dlad9a1 d3gsnb1 d3b2uc1 dlggbh1 d1t3fb1 dlnak11 d4ocmc\_  
d1lila1 d2v7hb3 d2esve1 d1mcoh1 d2qr0b1 d2q3aa\_ d1ct8a1 d1kcr11  
d2pxyb\_ d2uzih\_ d5c3ld\_ d3durb\_ d1c5c11 d2ak4e1 d1d17h\_ d1xiwd\_  
d1mlba1 d1rmf11 d1i7zb1 d1dlfl\_ d2xa3a\_ d5bq7b1 d1dqgb1 d3h4211  
d1legjh1 d1kcv11 d1fe811 d2j6e11 d1f3rb2 d1lk311 d1sm3h1 d1q0xh1  
d1ghfh1 d7fab11 d1igch1 d1lo0h1 d4idla\_ d5c2b1\_ d1jrh11 d1il1a1  
d3zhda1 d4kfzc\_ d1b0wa\_ d1e6oh1 d1mex11 d4krpb\_ d1fnsh1 d1ncwh1  
d4hgma\_ d4eigb1 d4rzca\_ d2mpa11 d4y5xa\_ d5en2b1 d3lrga1 d4ej1c1  
d1rhha1 dlj05b\_ d1forh1 d1q9wb1 d2wzpd\_ d2aq2a1 dlh0da1 d3revb1  
d2ij0c1 d1tzha1 d4m7jl1 d1k6ql1 d3b9kc1 d1igml\_ d3qeua1 d1dsfl\_  
d1celh1 d1kcu11 d1zvha1 d1zvoa1 d1tqbb1 d1ay111 d2qsc11 d2cgrh1  
d1n10h1 d1ken11 d3eo0a1 d4n9ob1 d1n0x11 d3k1kc\_ d1c4qa\_ d1prtcl  
d2wv6d\_ d1prtfl\_ d1l1trd\_ d4l63b1 d1r4pb\_ d1tl0f\_ d2bosa\_ d1prtb1  
d3chbd\_ d2aq2b1 d1ck1a1 d1enfa1 d1i4pa1 d1vloa1 d1et9a1 d1lesfa1  
d2g9hd1 d4ohja1 d1klud1 d1bxta1 d1eu3a1 d1ty0a1 d1fnua1 d2cqva1  
d1fhga\_ d2k1ma\_ d2d12a1 d1biha3 d1biha1 d1biha4 d3qp3a1 d1g1ca\_  
d1gxea\_ d1cvsc2 d1cvsc1 d1xmwa2 d2otpa2 d1biha2 d1rhfa2 d2fcba2  
d2fcba1 d1wwbx\_ d1gsma2 d1lepfa1 d1lepfa2 d2dava1 d1waaa\_ d1f97a2  
d1x44a1 d1vcaa2 d1fnla2 d1fnla1 d3b5ha2 d3h8na2 d3h8na1 d1bjba1  
d1bjba2 d1pd6a\_ d1f2qa2 d1f2qa1 d3cx2a\_ d1nbqa2 d3b5ha1 d1n26a1  
d1xiwb\_ d1xaua\_ d1fltx\_ d2ifga1 d1olla1 d1olla2 d1cs6a4 d1cs6a3  
d1cs6a2 d1cs6a1 d2gw5a2 d1sy6a1 d1xiwa\_ d1lucta2 d1lucta1 d1ry7b2  
d1gl4b\_ d1qz1a3 d1olza1 d2c9aa1 d1wwca\_

**Family-50 (c.2.1.2)**

**Positive dataset contains 78 protein sequences.**

d3sjua\_ d3ojfa1 d1xu9a1 d2jjya1 d1ylpa1 d4fs3a\_ d2bkaa1 d2c5aa1  
d1ulsa\_ d2b69a1 d1y5ma1 d1ydea1 d1snya1 d2rhca\_ d3zv4a\_ d5ceja\_  
d2d1ya1 d3w8ea\_ d2fmua1 d1x1ta\_ d3ay7a1 d2hrba1 d3ruaa\_ d2ew8a1  
d4hwka\_ d1xgka\_ d2bd0a1 d1yo6a1 d2a35a1 d2ntva\_ d1vl8a\_ d4bkua\_  
d2ag5a1 d2q45a\_ d4iy1a\_ d1zbqa1 d2q46a2 d2ptga\_ dluzma1 d3lyla\_  
d4m89a\_ d3weya\_ d2b11a1 d1w6ua\_ d1sb8a\_ d2q2va\_ d4nr0a\_ d2gasa\_  
d3oiga1 d2bgka1 d1vl0a1 d1wmaa1 d2c07a1 d1xkqa\_ d3tzha\_ d3lz6a\_  
d1zema1 d2xoxa\_ d1z45a2 d3lt0a\_ d4e6pa\_ d2wyua\_ d4q9na\_ d1xhla\_  
d4o1ma\_ d2uvda\_ d2gdza1 d2z1ma\_ d2o23a2 d2fr1a2 d2fr1a1 d4zjua\_  
d2a4ka1 d1yb1a\_ d1wvga1 d1yxma1 d3f4ba\_ d1xg5a1

**Negative dataset contains 3851 protein sequences.**

d1m32a\_ d1libja\_ d1c7na\_ d1iuga\_ d4q75a\_ d2bkwa1 d1t3ia\_ d1n8pa\_  
d1qz9a\_ d1jff9a\_ d1leg5a\_ d1p3wa\_ d3kgwa\_ d1c11a\_ d2ctza1 d2rfva\_  
d1gc0a\_ d1cs1a\_ d1d2fa\_ d2ch1a1 d1qgna\_ d1pffa\_ d1elua\_ d1c7ga\_  
d2v1pa1 d2ez1a\_ d1u08a\_ d1lc5a\_ d1b5pa\_ d2ay1a\_ d1bw0a\_ d3pd6a\_  
d7aata\_ d2csta\_ d1j32a\_ d1fg7a\_ d4wlha\_ d1o4sa\_ d1v2da\_ d1gdea\_

d1m6sa\_ d1v72a1 d1svva\_ d1ajsa\_ d1wsta1 d2f8ja2 d1lk9a\_ d1vp4a1  
d1xi9a1 d2gb3a1 d2bnma2 d2ovga\_ d1sq8a\_ d1rzsa\_ d3kz3a\_ d3orca\_  
d1xkta1 d2hfka\_ d1jmkc\_ d5d3ka\_ d2cfba1 d1dfoa\_ d1o69a\_ d1bj4a\_  
d3k28a\_ d2bwpa\_ d3lg0a\_ d2fnua\_ d3ou5a\_ d1z7da1 d1b9ha\_ d1iaya\_  
d4msoa\_ d1bs0a\_ d1s0aa\_ d1sffa\_ d3tqxa\_ d1mdoa\_ d3qboa\_ d3pgya\_  
d1bjna\_ d2dkja\_ d1ejia\_ d1vefa1 d4wxga\_ d3bs8a\_ d3gbxa1 d1w23a\_  
d2tbvc\_ d1c8nc\_ d1x36a\_ d1smvc\_ d1ng0c\_ d1lopoa\_ d1f2nc\_ d1ddla\_  
d1e57b\_ d1fwxa1 d1libya\_ d1f56a\_ d1bypa\_ d1azca\_ d1ws8a\_ d3u25a\_  
d1cuoa\_ d1lid2a\_ d1rkra\_ d2iaac\_ d4dplx\_ d1nwpa\_ d2gima\_ d2i7sa\_  
d1qhqa\_ d1gyca3 d1hfua2 d1kbva1 d1kbva2 d1sdda1 d1sdda2 d1gyca1  
d1gyca2 d1mzya1 d2bw4a1 d1aoza1 d1aoza3 d1aoza2 d1kyaa2 d1kyaa3  
d1kyaa1 d1mzya2 d4e9sa1 d1sddb1 d1sddb2 d1hfua1 d1hfua3 d1oe1a2  
d1oe1a1 d1v10a2 d1v10a3 d1v10a1 d2w0pa\_ d2diaa1 d2e9ia2 d2e9ja1  
d2dj4a1 d2eeba1 d2diba1 d2dmba1 d2dmca1 d2d7oa1 d2ee6a1 d2d7pa1  
d2eeaa1 d2di8a1 d1wlha1 d2d7na1 d2nqca\_ d2d7ma1 d2dica1 d3cnka\_  
d2k3ta1 d2eeca1 d1qfha2 d2bp3a1 d1v05a\_ d2ee9a1 d2eeda1 d2di9a1  
d3kasa1 d3bila3 d4qgna\_ d1vr3a1 d2bema\_ d1pama1 d1lea9c1 d1qhoa1  
d2fhfa2 d2fhfa1 d1k3ia1 d1cxlal d2bhua1 d1edqa1 d1f1sa2 d1lut9a2  
d1gvial d1txka1 d1adqa1 d1fnga1 d1uvqb1 d1zs8a1 d2vola1 d2vola2  
d1mfb12 d2jelh2 d1uwel2 d3qq4b1 d1kjbv\_ d1k5na1 d1osph2 d4odh12  
d1ow0a1 d1ow0a2 d1bfob2 d3l9ra2 d3jtth1 d2fath2 d4elkb2 d1fn4b2  
d2xfxb\_ d1pg7x2 d1cqka\_ d4k71b2 d1lk2a1 d1eapb2 d4lfhg2 d1i4fa1  
d2nw2a2 d1kfah2 d1mhca1 d1h3ua1 d1wejh2 d1h0db2 d1a5fh2 d1kcvh2  
d1mjuh2 d1qqda1 d1kcrh2 d1k8ia1 d3huja2 d2nnab1 d1nfd2 d3mffb2  
d1s9va1 d1lk3h2 d1q0xl2 d1fv1b1 d1neza1 d4rfeb2 d1r3ha1 d1a6tb2  
d1kjva1 d1pz5b2 d1onqa1 d2bc4a2 d1de4a1 d1k8da1 d1tcra2 d1dn0b2  
d1nfd2 d2xwtb2 d1bfoa2 d1mexh2 d1iakb1 d1ypzf2 d4f7ea2 d1q72l2  
d2fbjh2 d1fe8h2 d1clzh2 d1fngb1 d1uvqa1 d1vgka1 d1c16a1 d4j12a2  
d4x99b2 d1igtb3 d1je6a1 d1q72h2 d1nldh2 d1teth2 d2hmic2 d1ilca2  
d1ilca1 d1k8ib1 d1q0yh2 d1kfa12 d3frua1 d1pg7w2 d1u58a1 d1igyb4  
d1igyb3 d1hyrc1 d1klub1 d1deeb2 d1c12b2 d2bc4b2 d2ig2h2 d1kcvl2  
d3wn5b1 d1lk2b\_ d1lk3l2 d1mjul2 d1sm3h2 d1q0xh2 d1zvsal d1ydpal  
d1u8ib2 d1ypze2 d1kcuh2 d4alac\_ d1pjwa\_ d1rera1 d1s6na\_ d3uzqb\_  
d1ofda3 d1ea0a3 d1ecfa2 d1q15a2 d1ct9a2 d1ao0a2 d1te5a\_ d1lep0a\_  
d2pa7a1 d1wlta1 d1nxma\_ d2c0za1 d1nepa\_ d1ktja\_ d1ds6b\_ d1fstb\_  
d1ex0a1 d3us3a3 d3us3a1 d4mh8a\_ d1mu2a2 d4i7ga1 d1tafa\_ d1bh9b\_  
d1jfib\_ d1q9ca\_ d1h3ob\_ d2byka1 d1n1ja\_ d4g92b\_ d1bh9a\_ d1jfia\_  
d1h3oa\_ d2bykb1 d1n1jb\_ d3nvva1 d1krha3 d2h88b1 d1n62a2 d1t3qa2  
d1zoyb1 d1jq4a\_ d1ffva2 d1dgja2 d1rm6c2 d1h4ba\_ d2opoa\_ d1ydwa2  
d2nvwa2 d1h6da2 d1zh8a2 d1qkia2 d1xeea2 d1tlta2 d1r0ka3 d1j5pa3  
d1vkoa2 d1vm6a2 d3qvsa2 d1gr0a2 d1p1ja2 d1orva2 d1xfda2 d3gpdg2  
d2q49a2 d1hdgo2 d2g17a2 d2cvoa2 d2czca1 d3pwka2 d1obfo2 d1i32a2  
d1zyao2 d2pkqo2 d1b7go2 d2hjsa2 d1cf2o2 d1vkna2 d1nvmb2 d4lt9a1  
d3tc7a1 d3hoja\_ d1i4na\_ d3vnda\_ d3n18a1 d1geqa\_ d3naval d1v5xa\_

d4a2ra1 d3tc6a1 d1ujpa\_ d4ijba\_ d1xcfa\_ d1vc4a\_ d1rd5a\_ d1qopa\_  
d3b5va\_ d2msya\_ d2djoa1 d2r5za\_ d1au7a1 d1f43a\_ d2lmda1 d1akhb\_  
d1s7ea1 d3nara\_ d1zq3p1 d2craa1 d1mija\_ d4uuta\_ d3a01a\_ d1x58a1  
d3rkqa1 d3cmya1 d2cqxa1 d2da6a1 d1e3oc1 d1fjla\_ d1mh3a1 d1x41a1  
d1wh7a1 d1gt0c1 d2mw8a\_ d1lfup\_ d1x2ma1 d1b72a\_ d1wi3a1 d1jgga\_  
d1wjha1 d1x2na1 d1mnmc\_ d2cuea1 d3k2aa\_ d2hosa\_ d2jwta2 d1pufa\_  
d1octc1 d2hi3a\_ d1b8ia\_ d4j19a\_ d3lnqa\_ d1wh5a1 d1b8ib\_ d1fexa\_  
d2cqra1 d1guua\_ d1ug2a1 d2cqqa1 d2ajea1 d4a69c\_ d1h8ac1 d2crga1  
d2iw5b1 d1xc5a1 d1ofcx1 d2cu7a1 d1wgxa1 d2cjja1 d2ckxa1 d1gvda\_  
d1hcra\_ d1tc3c\_ d1gdta1 d1u78a2 d1hlva1 d1hlva2 d1iufa1 d1b10a1  
d1b10a2 d1d5ya1 d3lv8a\_ d1zaka1 d1s4qa\_ d3tvta2 d1uf9a\_ d1khta\_  
d1ckea\_ d1osna\_ d1p5zb\_ d4tmka\_ d3cm0a\_ d1tmka\_ d1jaga\_ d3h86a\_  
d1t0hb\_ d1nn5a\_ d2h92a\_ d3kb2a1 d2c95a1 d1yj5a2 d1kgda\_ d1ly1a\_  
d2ak3a1 d1vyva2 d1deka\_ d2grja1 d1p3ja1 d1y63a\_ d1e4ya1 d1s96a\_  
d3iija1 d1lvga\_ d1nksa\_ d1vyua2 d4e22a\_ d1qf9a\_ d1jjva\_ d1q3ta\_  
d1ki9a\_ d1lw7a2 d1teva\_ d1kjwa2 d1gsia\_ d1x6va3 d1g3ma\_ d1j99a\_  
d1t8ta1 d1nsta\_ d1fmja\_ d1zrha\_ d1ls6a\_ d2a3ra\_ d2zptx\_ d3ckla\_  
d1texa\_ d1q44a\_ d2gwha\_ d1odfa\_ d1uj2a\_ d4gi7a\_ d2jeoa1 d1z0ja1  
d3umra2 d3gj0a1 d2gaoa1 d1yzga1 d1x3sa1 d1g7sa4 d1puja\_ d1udxa2  
d1kk1a3 d2o52a\_ d1jwyb\_ d1zcaa2 d1zcba2 d2fv8a1 d2cjwa\_ d3dz8a1  
d1xzipa2 d1vg8a\_ d4qxaa\_ d2ew1a1 d1x1ra1 d2bcgy\_ d3doea1 d3cona\_  
d3rega\_ d3wyga\_ d1upta\_ d2b6ha1 d1zd9a1 d1lnza2 d1r5ba3 d1n0ua2  
d1r2qa\_ d2f91a1 d2rhda\_ d3q3jb\_ d3q85a\_ d1efma1 d1r8qa\_ d2gf9a1  
d2akab1 d1ek0a\_ d1z08a1 d2gcoa1 d2dyla2 d4g01b\_ d2cxxa1 d1svia\_  
d3q72a\_ d1ni3a1 d4ac9a4 d2erxa1 d2bmea\_ d1wxqa1 d2gf0a1 d4ldja1  
d1zunb3 d1d5ca\_ d4lv5b\_ d1efca3 d1kmqa\_ d2g6ba1 d3lrpa\_ d1tada2  
d2y8ea\_ d4rd4a1 d1z06a1 d2heia\_ d3a58b\_ d1u01a2 d1d2ea3 d1zj6a1  
d2ocba\_ d3rwoa\_ d1mr3f\_ d2e9sa1 d4u5xa1 d2iwra\_ d2fn4a1 d3bwdd\_  
d2nzja1 d2atva1 d2ksqa\_ d3l43a\_ d1mkya2 d1mkya1 d1wmsa\_ d1jnja3  
d2rmka\_ d1f6ba\_ d1f60a3 d1gota2 d1jala1 d2fh5b1 d1g16a\_ d2wblc\_  
d1m7ba\_ d1wf3a1 d1f5na2 d1t9ha2 d1z6xa1 d1z0aa1 d2fg5a1 d2a5ja1  
d2bcjq2 d1s0ua3 d1ky3a\_ d4y0va\_ d4lhwa\_ d2qmea1 d2atxa1 d1legaa1  
d1ryha\_ d1moza\_ d1nrjb\_ d2erya1 d3bfka\_ d1puia\_ d1fzqa\_ d3j3az1  
d3t5ga\_ d1shza2 d3defa\_ d2f7sa1 d3raba\_ d3tsoa\_ d3aq4a\_ d2a17a1  
d3sfva1 d3bc1a\_ d2ncda\_ d1sdma\_ d3h4sa1 d2heha\_ d2grya\_ g3kin.1  
d1kk8a2 d1br2a2 d1goja\_ d1f9va\_ d2mysa2 d3t0qa\_ d4db1a1 d3gbja\_  
d1ry6a\_ d1v8ka\_ d1s5ja2 d1qhta2 d4dlea2 d1tgoa2 d3py8a2 d1q8ia2  
d1kfsa2 d2py5a2 d1d5aa2 d1k8ka2 d1k8ka1 d3uleb1 d3i33a2 d3i33a1  
d1bupa1 d1dkgd2 d1dkgd1 d4ci6a2 d1jcfa1 d4a2ba2 d2fxua1 d1yaga1  
d4cbua2 d1bupa2 d3vrda1 d3vrda2 d1fcdc2 d1fcdc1 d1h1oa2 d1h1oa1  
d1m70a1 d1lig8a1 d1czan2 d1czan3 d1czan1 d1lig8a2 d1czan4 d1bg3a4  
d1bg3a3 d1bg3a2 d1bg3a1 d1nira1 d1qksa1 d3h1jd1 d2d0oa3 d2d0oa2  
d1nbwa2 d1hroa\_ d4gedb\_ d3zooa\_ d1mz4a\_ d1gu2a\_ d1f1fa\_ d1dvva\_  
d1c6ra\_ d1c75a\_ d1e29a\_ d1gdva\_ d1cnoa\_ d1h32b\_ d1co6a\_ d2bh4x\_

d2aiua\_ d5cytr\_ d1jdl\_ d1i8oa\_ d2zboa\_ d3dmia\_ d1ls9a\_ d1wvec\_  
d2yk3a\_ d3ph2b\_ d1dw0a\_ d5aura\_ d1ql3a\_ d1qn2a\_ d1flca\_ d4zzva\_  
d2xspa\_ d1eg1a\_ d4v20a\_ d1ojja\_ d4ipma1 d4csia\_ d3pfza\_ d3ovwa\_  
d2yoka\_ d2nqya\_ d1h4ga\_ d1hixa\_ d1oa2a\_ d1olra\_ d3b7ma\_ d4h7ma1  
d3wp3a\_ d2vgda\_ d1igoa\_ d3zsea\_ d2nlra\_ d3wx5a\_ d1oa3a\_ d1pvxa\_  
d1m4wa\_ d1f5ja\_ d1oa4a\_ d4ixla1 d2a6za1 d3a4ua\_ d2a6va1 d3sita1  
d1evsa\_ d1cnt1\_ d1pvhb\_ d1z7ca\_ d1huwa\_ d1bgea\_ d1rhga\_ d1f6fa\_  
d1f45b\_ d1i1rb\_ d1axia\_ d1etea\_ d3tgxb\_ d1scfa\_ d2z3qa1 d3qb1a\_  
d1hula\_ d1m48a\_ d4nkqb\_ d1eera\_ d1v7mv\_ d5e4ea\_ d2o27a\_ d3b5ka\_  
d2psma1 d4zf7a\_ d3uf5a\_ d4x51a\_ d1d9ca\_ d4ypgc1 d3oq3a\_ d1lqsl\_  
d1aula\_ d1wu3i\_ d3bes1\_ d3ux9a\_ d3rbaa\_ d2qtra\_ d1nupa\_ d3l92a\_  
d1f9aa\_ d1qjca\_ d2h29a\_ d1vlha\_ d1od6a\_ d1lw7a1 d4ruka\_ d2el7a\_  
d1iq0a2 d1irxa2 d1r6ta2 d1ivsa4 d2cyba\_ d1rqga2 d1j09a2 d2yxna\_  
d1f7ua2 d1h3fa1 d2g36a1 d1nzja\_ d1jila\_ d1n3la\_ d1i6la\_ d1pfva2  
d1h3na3 d3n9ia\_ d3sz3a1 d3sw2a\_ d1moxc\_ d1dx5i3 d1autl2 d1autl1  
d1nqlb\_ d1dval1 d1szba2 d1kigl\_ d2y5fl\_ d1ijqa2 d1gk5a\_ d1glsa2  
d1nt0a3 d1xdtr\_ d1lmja2 d1lmja1 d1nzia2 d2wphe\_ d1klil\_ d1pfxl2  
d1pfxl1 d1p9ja\_ d1glta2 d1f7ea\_ d4yzub\_ d1kb0a1 d2mgpa1 d1b9wa1  
d1b9wa2 d2mgpa2 d1ob1c1 d1ob1c2 d1n1ia2 d2npra2 d2npra1 d2y5ia\_  
d1qlsa\_ d1psra\_ d3n22a\_ d2egda\_ d4ggfc\_ d2wcea\_ d2luca\_ d4aqia\_  
d3nsia\_ d2lp3a\_ d1j55a\_ d1a4pa\_ d1nsha\_ d3fs7a\_ d2pvba\_ d1ttxa\_  
d1rwya\_ d2kyfa\_ d1rk9a\_ d1a75a\_ d1exra\_ d1tiza1 d1nyaa\_ d1g8ia\_  
d1ggwa\_ d1wdcc\_ d3fwba\_ d1ggza\_ d2o5ga\_ d1ctaa\_ d1m45a\_ d3i5gc\_  
d1sl8a\_ d1fpwa\_ d2scpa\_ d2roaa\_ d4aqra\_ d3pn7b\_ d1br1b\_ d2mysb\_  
d1s6ca\_ d1bjfa\_ d2obha\_ d1jfka\_ d1jf0a\_ d1qv0a\_ d1lkja\_ d2mlfc\_  
d2m97a\_ d2d8na\_ d4by5a\_ d1jbaa\_ d4nqga\_ d2mysc\_ d1j7qa\_ d1s6ia\_  
d1uhka2 d1r2ua\_ d1dtla\_ d3kf9a\_ d3pn7c\_ d5d67d\_ d1tuza\_ d1h8ba\_  
d1eg3a2 d2zkmx1 d1snla\_ d1gjya\_ d1y1xa\_ d1dvia\_ d1df0a1 d1qxp2  
d4usla\_ d1k94a\_ d1sfsa\_ d1jfxa\_ d1wkya2 d1uuqa\_ d3wh9a\_ d4m1ra\_  
d1xyza\_ d4xuya\_ d2je8a5 d4bf7a1 d3cuia\_ d1ur4a\_ d1qw9a2 d1lodza\_  
d2vzsa5 d1bqca\_ d2x2ya1 d1hjqa\_ d1qnra\_ d4y7ea1 d1vjza\_ d4k68a\_  
d2v3ga\_ d4hpga\_ d1nofa2 d1nq6a\_ d1h4pa\_ d1aq0a\_ d3ziza\_ d4bs0a\_  
d1ecea\_ d1h1na\_ d1ta3b\_ d1w91a2 d1ilwa\_ d1us3a2 d1legza\_ d7a3ha\_  
d1tvna1 d3nyda1 d1ghsa\_ d2cyga1 d4xv0a\_ d2c8na2 d1w32a\_ d3emca\_  
d1v6ya1 d1foba\_ d2uwfa1 d2fgla\_ d3niya1 d2c0ha1 d1rh9a1 d1yq2a5  
d1szna2 d1fa2a\_ d1pama4 d5do8a1 d1ea9c3 d1hx0a2 d2fhfa5 d1qhoa4  
d1avaa2 d1m53a2 d4m8ua1 d2gjpa2 d1lwha2 d4howa1 d1ktba2 d1j0ha3  
d3vm5a1 d2x1ia\_ d1wzaa2 d1uasa2 d2diea1 d1mxga2 d1ht6a2 d1leswa\_  
d1iv8a2 d5cpsa\_ d1ud2a2 d1zjaa1 d3gbea1 d1kwa2 d1wdpa\_ d1gcya2  
d1g5aa2 d1hvxa2 d3dhpa2 d2bhua3 d4do4a1 d3qgva1 d1e43a2 d1g94a2  
d2d3na2 d1gjwa2 d1gvia3 d1x1na1 d1r7aa2 d1tz7a1 d4toqa\_ d1wb0a1  
d1w9pa1 d1eoka\_ d1itxa1 d1kfwa1 d1goia2 d1edqa2 d2gsja\_ d1hjxa1  
d1jnda1 d1vf8a1 d3wdpp1 d3wq5a\_ d1gnxa\_ d4gxp2\_ d4hz8a\_ d1e4mm\_  
d3aiua\_ d1wcca1 d1qvba\_ d3ahxa\_ d1v02a\_ d2dgaa\_ d1pbga\_ d1vffa1

d1qoxa\_ d4ha4a\_ d1mixa2 d1e5wa2 d1j19a2 d1isna2 d2a16b2 d3syxa1  
d1mkea1 d2p8va\_ d1xoda1 d1i7aa\_ d1evha\_ d1legxa\_ d2y8ga\_ d1xkea1  
d1k5db\_ d2y8fa\_ d1b9ra\_ d1offa\_ d1frra\_ d3wcqa\_ d1e9ma\_ d1l5pa\_  
d1wria\_ d1i7ha\_ d3av8a\_ d1rfka\_ d3p1ma1 d3b2ga\_ d2bt6a2 d1wgqa1  
d1v89a1 d2coda1 d1zc3b\_ d1wg7a1 d1u5ea1 d1v61a1 d2coca1 d2ys1a1  
d1v5pa1 d1ntya2 d1wjma1 d1wi1a1 d1u29a\_ d1xx0a1 d1unqa\_ d2zkmx3  
d1fhoa\_ d1v88a1 d2adza1 d1x1fa1 d1p6sa\_ d2coaa1 d1btka\_ d1v5ma1  
d1faoa\_ d2x18a\_ d1dyna\_ d1x1ga1 d4kaxb\_ d2j59m1 d1ki1b2 d1xcga2  
d1txda2 d1u5da1 d1dbha2 d1wl1ha\_ d1upqa\_ d1v5ua1 d1foea2 d2fj1a1  
d1eaza\_ d2dfka2 d2cofa1 d1kz7a2 d1r55a1 d3gboa\_ d1atla\_ d1kufa\_  
d1buda\_ d4q11a\_ d1quaa\_ d1yp1a\_ d1wnia\_ d1ex0a4 d1g0da4 d2f4ma1  
d1x3za\_ d3ulra1 d1g9ka2 d1kapp2 d1t3ca\_ d2a97a\_ d3f1ea\_ g1e1h.1  
d3ioqa\_ d1fh0a\_ d1o0ea\_ d1khqa\_ d1m6da\_ d2cb5a\_ d1cs8a\_ g8pch.1  
d1s4va\_ d2pnsa\_ d1vsna1 d1mira\_ d1iwda\_ d2oula\_ d7pcka\_ d3bwka\_  
d3bcna\_ d2p86a\_ d1pvja\_ d1pcia\_ d1gece\_ d1deua\_ d4bs6a\_ d1xkga1  
d1cqda\_ d1jqpa2 d2c0ya\_ d2bdza\_ d3p5ua\_ d1zoya1 d1qo8a2 d1d4ca2  
d1jnra2 d1kf6a2 d2jk6a2 d2jk6a1 d1feca1 d1feca2 d1lpfa1 d1lpfa2  
d1xhca1 d1xhca2 d1dx1a2 d1dx1a1 d1gera2 d1m6ia2 d1onfa1 d1onfa2  
d3lada2 d3lada1 d1w4xa1 d1w4xa2 d1mo9a1 d1xdia1 d1f12a2 d1f12a1  
d1fcda1 d1fcda2 d1h6va2 d1h6va1 d1mo9a2 d1gv4a2 d1gv4a1 d2gv8a2  
d2gv8a1 d1aoga1 d1aoga2 d1hyua1 d1ebda1 d1ebda2 d3dk9a1 d1q1ra2  
d1q1ra1 d1gesa1 d1zbf1a1 d2z1ha\_ d2etja1 d3qioa1 d1j11a\_ d2e41a\_  
d1j12a\_ d2lsna1 d1io2a\_ d1uaxa\_ d2yv0x\_ d1mu2a1 d1ekea\_ d1i39a\_  
d1ps9a2 d1o94a2 d1cjca1 d1pn0a1 d1reoa1 d1ju2a1 d2f5va1 d3c96a1  
d2gmha1 d1pj5a2 d1gpea1 d1o5wa1 d1n4wa1 d1k0ia1 d2dw4a2 d2ivda1  
d1seza1 d2voua1 d1kdga1 d1s5ja1 d2hbja2 d2igia\_ d1wlja\_ d1qhta1  
d4dlea1 d1tgoa1 d2f96a1 d3tr8a1 d3mxma\_ d1q8ia1 d1y97a1 d1w0ha\_  
d1kfsa1 d2py5a1 d1d5aa1 d1yt3a3 d2guia\_ d3mwp1a1 d4kb1a\_ d2v76a\_  
d1wj1a1 d1aqca\_ d1qqga2 d1qqga1 d1ntva\_ d1n3ha\_ d4dbba\_ d3f0wa1  
d1p3ra\_ d1wgua1 d2cy4a1 d3hqca\_ d1wvha1 d1xr0b1 d2av4a1 d1jmx3a4  
d1jmx3a3 d1pbya3 d1jmx2a2 d1pbya1 d1pbya2 d1faaa\_ d1wika1 d1xfla\_  
d1ttza1 d2f51a1 d1ti3a\_ d1nhoa\_ d1sena\_ d2i4aa\_ d1ep7a\_ d1zmaa1  
d1fo5a\_ d3lefa1 d3diea1 d2yana1 d1z6na1 d1oaza\_ d3zywa1 d4aj8a\_  
d1nm3a1 d4fiwa\_ d1wmja\_ d4hs1a1 d1iloa\_ d1xwaa1 d1wjka1 d2vm1a\_  
d1fb6a\_ d1gh2a\_ d1h75a\_ d1nw2a\_ d1kx5b\_ d3a6na\_ d4m6ba2 d2nqbd\_  
d3wkjd\_ d2yfwe\_ d4h9na\_ d5bnxa\_ d1kx5c\_ d3r45a\_ d1eqzb\_ d4jjnb\_  
d1f66c\_ d1eqza\_ d4wnnb\_ d1kx5a\_ d1u35c1 d1id3a\_ d2nqbc\_ d1kx5d\_  
d1ku5a\_ d1f1ea\_ d1b67a\_ d2b5ea2 d2b5ea3 d2b5ea1 d2b5ea4 d2kp1a1  
d2kp2a1 d1hyua3 d1hyua4 d1j08a1 d1j08a2 d1pd212 d1nhya2 d2a2ra2  
d1k0dd2 d1f2ea2 d1gsua2 d1f3ba2 d2fhea2 d2pvqa1 d1tw9a2 d1oyja2  
d1e6ba2 d1k0ma2 d3ik7a1 d4is0a1 d1r5aa2 d1j1va2 d1m0ua2 d3gtub2  
d1z9ha2 d1okta2 d1axda2 d2gsra2 d1tu7a2 d1k3ya2 d1zgma1 d1gnwa2  
d1gwca2 d2gsta2 d1glqa2 d1oe8a2 d1pn9a2 d1v2aa2 d1fw1a2 d1duga2  
d4ilya\_ d4olta\_ d1qgia\_ d1gd6a\_ d1f6ra\_ d1ivma\_ d2gv0a\_ d1iiza\_

d2z2fa\_ d1j8xa\_ d1ghla\_ d1b9oa\_ d1741a\_ d1691a\_ d2o4wa\_ d1p37a\_  
d1k28a3 d1xjta1 d1jtma\_ d2f2qa\_ d4e97a1 d1g4ma1 d1a3qa1 d1iknc\_  
d3brda1 d1p7hl1 d1oy3c\_ d1gjia1 d1zk9a1 d2cxka1 d2za0a\_ d2c21a1  
d2pjsa1 d1k1la\_ d2i7ra1 d1ecsa\_ d1xqaa1 d5cj3a1 d1npba\_ d1jifa\_  
d2p7oa\_ d1r9ca\_ d1nkia\_ d1mpya2 d1kw3b2 d1kw3b1 d4ghga1 d1tfza1  
d3isqa1 d3isqa2 d1sqia1 d1sqia2 d1lkda2 d1lkda1 d1mpya1 d1cjxa2  
d1sp9b2 d1t47a1 d1t47a2 d1flua2 d1sp8a1 d1sp8a2 d1flua1 d1ro5a1  
d1pv8a\_ d1w5qa\_ d2c1ha\_ d1l6sa\_ d1qsta\_ d2beia1 d4m3sa\_ d1u6ma1  
d1ygha\_ d1yk3a1 d3dr6a\_ d1xmta\_ d1z4ea1 d2ge3a1 d1bo4a\_ d2fiaa1  
d2jdca1 d1y9wa1 d3to7a\_ d1wwza1 d2fl4a1 d2ozua1 d2b5ga\_ d2cy2a1  
d2p0wa\_ d1cm0a\_ d4pswa\_ d1yrea1 d1yr0a1 d1m4ia\_ d2gana1 d1yvka1  
d1ghea\_ d2g3aa1 d1y7ra1 d2euia1 d1q2ya\_ d2fsra1 d1xeba\_ d2ae6a1  
d1cjwa\_ d1qsma\_ d2aj6a1 d1y9ka1 d1i12a\_ d1vkca\_ d2atra1 d1n71a\_  
d2d4pa1 d2fiwa1 d2fe7a1 d1tiqa1 d2ou2a\_ d1yx0a1 d2fcka1 d1p0ha\_  
d2j8ma\_ d2pq8a\_ d1z4ra1 d1s3za1 d1ufha\_ d1xvqa1 d1pn0a2 d3hy2a\_  
d2cvba1 d1o8xa\_ d1lu4a\_ d1we0a1 d2bmxa1 d2a4va1 d1xiya1 d1q98a\_  
d1n8ja\_ d1zofa1 d2ggta\_ d3tjja\_ d4jela1 d1o73a\_ d3s9fa\_ d2zcta\_  
d1qmva\_ d1jfua\_ d2b1ka\_ d5dvba1 d2b5xa1 d2v2ga\_ d1st9a\_ d3tb2a\_  
d4llra\_ d4fh8a1 d1e2ya\_ d1knga\_ d2h30a\_ d1i5ga\_ d2z9sa\_ d2f8aa1  
d1tp9a1 d2b7ka\_ d1nm3a2 d3hvva\_ d2wfca1 d4kcea\_ d1xvwa1 d4gqca1  
d3qpma\_ d4k1fa\_ d1zzoa1 d1gp1a\_ d1prxa\_ d4od7a1 d1z6ma1 d4mcua1  
d4dvca1 d3l9sa\_ d1un2a\_ d3rppa\_ d1rmka\_ d1ixta\_ d1eyoa\_ d1cnna\_  
d1g1pa\_ d1f3ka\_ d1fyga\_ d2m5ta\_ d1cqqa\_ d1wqsa\_ d5bpea\_ d2ipha\_  
d2bhga1 d3tnta\_ d3sjia\_ d3d23a1 d2fyqa\_ d3tloa\_ d3zvea1 d2hrva\_  
d3q3ya1 d4asha1 d2phla2 d2phla1 d1fxza2 d1fxza1 d1lrha\_ d1uija1  
g1dgw.1 d2v09a\_ d1uika2 d1uika1 d1dgwa\_ d1e88a1 d1l6ja5 d1l6ja4  
d1eaka4 d1eaka3 d1l6ja3 d1h8pa1 d1etha2 d1w52x1 d2ppla1 d1hpla2  
d1lpbb2 d2oxea1 d1bu8a2 d1rpla2 d1lgya\_ d4l3wa\_ d1llfa\_ d1gz7a\_  
d1ukca\_ d3groa\_ d1pjaa\_ d1thta\_ d3ia2a\_ d1a88a\_ d4dgqa1 d1zoia\_  
d3zxha\_ d1cgla\_ d1rm8a\_ d1eaka2 d1hy7a\_ d2jsda\_ d1cxva\_ d1hv5a\_  
d4dv8a2 d1j7na1 d1dzka\_ d4tlja\_ d2a2ua\_ d4wfva\_ d3t1da\_ d4iixa\_  
d3zq3a\_ d2nnda\_ d1i4ua\_ d1kxo\_ d1bbpa\_ d1kt7a\_ d1exsa\_ d3s26a1  
d1lf7a\_ d1qfta\_ d4gh7a\_ d1z24a1 d1qabe\_ d1xkia\_ d1lew3a\_ d3bx7a\_  
d4iawa1 d1n0sa\_ d1gkab\_ d3kzaa\_ d2k23a\_ d2l9ca1 d2joza1 d1gm6a\_  
d3kffa\_ d3saoa1 d1e5pa\_ d1yupa1 d1iiua\_ d1lmra\_ d1cixa\_ d1y29a\_  
d1v7fa\_ d2jtba\_ d1d1ha\_ d1g9pa\_ d1lupa\_ d1qk7a\_ d1mb6a\_ d2a2va\_  
d1niya\_ d1i25a\_ d1hvwa\_ d2mpqa\_ d1ie6a\_ d1kqha\_ d1la4a\_ d2mxoa1  
d1koza\_ d1qk6a\_ d1emxa\_ d1lqra\_ d1c6wa\_ d1js9c\_ d1f15b\_ d1za7a\_  
d1laja\_ d1rypd\_ d1irua\_ d1rypc\_ d3unfk\_ d1rypa\_ d1j2pa\_ d1irui\_  
d1j2qh\_ d3unfh\_ d1m4ya\_ d1rypb\_ d1irul\_ d1irug\_ d1iru2\_ d1q5rh\_  
d1rypg\_ d1g3ka\_ d1iruf\_ d1q5qa\_ d1e94a\_ d1irub\_ d1ryph\_ d3ty6a\_  
d1iruj\_ d1iruk\_ d1rype\_ d1irud\_ d1irue\_ d3mi01\_ d1rypf\_ d1iruh\_  
d2z3ba\_ d3mka2\_ d1irul\_ d1mqta\_ d1d4m3\_ d1fmd3\_ d2mev1\_ glaym.1  
d1ev13\_ d4q4w1\_ d1r1a3\_ d2x5ia\_ d1rhi1\_ g1r1a.1 g1d4m.1 g1rhi.1

d1b35b\_ d1loopa\_ d1tme1\_ d4iv1a\_ glpvc.1 glfpn.1 d1fpn1\_ d4gb31\_  
d1d4m1\_ d1fmd1\_ d1ev11\_ d2wzr3\_ glcov.1 d1qqp3\_ glfmd.1 d2x5ic\_  
d1rhi3\_ g1loop.1 d1hxs1\_ g1hxs.1 d1fpn3\_ d1bev1\_ g2mev.1 d1eah3\_  
d1aym1\_ d1pvc3\_ d1qqp1\_ d1zba3\_ d1h8ta\_ d3vbhc\_ g1b35.1 g1bev.1  
d1hxs3\_ g1ev1.1 d1bev3\_ g1tmf.1 d1tmf1\_ d1b35a\_ d2mev3\_ g1eah.1  
g1h8t.1 d1eah1\_ d4q4w3\_ d1r1a1\_ d1pvc1\_ d1zba1\_ d1h8tc\_ d1loopc\_  
d1tme3\_ g1qqp.1 d4iv1c\_ g1tme.1 d1y14b1 d2nn6i1 d1i941\_ d2zjra2  
d1smxa\_ d2qamc2 d1hh2p1 d2r7da1 d1rl2a2 d1wfga1 d3bzka4 d1x6oa2  
d3a0ja\_ d2j01d2 d2ja9a1 d4q15a\_ d1hr0w\_ d1luza\_ d2n3sa\_ d2vnud1  
d1h95a\_ d1go3e1 d2nn6h1 d2mo1a\_ d1iz6a2 d1jjga\_ d1e3pa2 d2ix0a3  
d2ix0a2 d2lxja\_ d1ueba3 d1ueba2 d2z0sa1 d1u0la1 d2ix0a1 d2eifa2  
d2je6i1 d3i2za1 d2c35b1 d2ahob2 d1t9ha1 d3i4oa\_ d2qall1 d1jt8a\_  
d2nn6g1 d1g6pa\_ d3cama\_ d1i94q\_ d1c9oa\_ d1d7qa\_ d2ba0a1 d2vnud2  
d2vnud3 d1khia2 d2qalq1 d1wi5a1 d1xtda2 d1ny4a\_ d1eixa\_ d3exra\_  
d2ffca1 d2fdsa1 d3n3ma1 d2czda\_ d2yyua\_ d1vqta1 d1dbta\_ d3ldva1  
d1ux8a\_ d4i0va\_ d2bkma\_ d1dlwa\_ d2bmma\_ d2r80b\_ d1cqa1\_ d1cg5a\_  
d1gcvb\_ d3boma\_ d2h8fb\_ d2raoa\_ d3bj1a\_ d4hrrb\_ d2r50a\_ d3d1kb\_  
d2aalb1 d3zhwa\_ d3hf4b\_ d3gdja\_ d1jebb\_ d3bj1b\_ d1x9fb\_ d1wmub\_  
d1gcva\_ d3bcqb\_ d3d4xb\_ d1gvha1 d2dc3a\_ d3hf4a\_ d4yu3a\_ d3k8ba\_  
d1qpwb\_ d2r80a\_ d3bcqa\_ d1v4wa\_ d3wtgb\_ d1j17a\_ d4esaa\_ d1a9we\_  
d3d1ab\_ d1fsla\_ d4h21a\_ d1v4wb\_ d1mwca\_ d1vhba\_ d1jeba\_ d1spgb\_  
d1h97a\_ d1q1fa\_ d1tu9a1 d3d1aa\_ d1hdsb\_ d3hyub\_ d2zfb\_ d3fs4a\_  
d1oj6a\_ d1shrb\_ d4h21b\_ d4yu3b\_ d1spga\_ d3hrwa\_ d3qqra\_ d3at5a\_  
d4wchd\_ d3hyua\_ d1cg5b\_ d1uc3a\_ d1hbra\_ d2raob\_ d1outb\_ d4esab\_  
d3gdjb\_ d3qqqa\_ d1x9fc\_ d3vrfa\_ d1litha\_ d3mkba\_ d3d4xa\_ d3mjpa\_  
d1j16a\_ d3fh9a\_ d1outa\_ d2dc3b\_ d1lit2a\_ d3eoka\_ d3g46a\_ d1qpwa\_  
d3vrfb\_ d1ch4a\_ d1x9fd\_ d1hdsa\_ d2zfb\_ d3mkbb\_ d1or4a\_ d3wtga\_  
d1a4fa\_ d3fh9b\_ d3bomb\_ d3cy5a\_ d3at5b\_ d1x9fa\_ d2oifa\_ d4lmb\_  
d1cpcb\_ d3v57a\_ d1kn1a\_ d1cpca\_ d4f0ta\_ d2vjha\_ d4po5b\_ d1eyxa\_  
d1alla\_ d4f0tb\_ d1b33b\_ d1b8db\_ d4h0mb\_ d1b33a\_ d2vjhb\_ d4lmb6\_  
d2vmlb\_ d1allb\_ d2vjta\_ d3dbja\_ d2vmla\_ d2vjtb\_ d4f0ub\_ d1f99b\_  
d4rmpa1 d1liaa\_ d1eyxb\_ d2uulb\_ d4lmsb\_ d4f0ua\_ d2bv8a\_ d1f99a\_  
d2bv8b\_ d2c71b\_ d3dbjb\_ d4rmpb1 d1b8da\_ d4h0ma\_ d3v57b\_ d1liab\_  
d2uula\_ d2j96a\_ d1mtza\_ d2xqfa\_ d1ea5a\_ d1f6wa\_ d1dx4a\_ d1qe3a\_  
d1k4ya\_ d4qwwa\_ d2ha2a\_ d1gl9b1 d1gkub1 d2qvba\_ d2v9za\_ d4kafa1  
d4iuua3 d4bvva\_ d5hpga\_ d3k65a\_ d1ki0a3 d1ki0a2 d1ki0a1 d1pmla\_  
d3sp8a3 d2feba1 d1f74a\_ d3l21a\_ d2e1da\_ d1to3a1 d1w3ia\_ d1sfla\_  
d1n7ka\_ d1vcva1 d4imea\_ d1wa3a\_ d2ocza1 d1f2ja\_ d3m16a\_ d2yxga\_  
d1ub3a\_ d3a5fa\_ d1fbaa\_ d1l6wa\_ d1xfba1 d1wx0a1 d1vpxa1 d1ojxa\_  
d1mxsa\_ d2a4aa1 d1xkya1 d3cq0a1 d3s1xa\_ d1f05a\_ d1fdja\_ d3cpra1  
d4d2ja\_ d1cg2a1 d1yloa2 d1y7ea2 d1y0ya3 d1lfwa1 d1vixa1 d1fnoa4  
d1vhoa2 d1ysja1 d1vhea2 d1z21a1 d2fvga2 d1vgya1 d1r3na1 d2grea2  
d1xmba1 d1rtqa\_ d3rp2a\_ glucy.1 d1fuja\_ d2zchp\_ d3w94a\_ d1si5h\_  
d1lo6a\_ g2pka.1 d1cgha\_ d1kigh\_ d1a5ia\_ d3s9ba\_ d1hj8a\_ d1ao5a\_



d2anya\_ dlq3xa1 dlgvza\_ dlazza\_ d4gsoa\_ d2f91a1 dliaua\_ dlgdna\_  
dleufa\_ glfiw.1 dleq9a\_ d4nfea\_ d2rdla\_ dlspja\_ dlelva1 dla7sa\_  
dlekbb\_ dlpfxc\_ dlyc0a\_ d2aiqa\_ glfiz.1 dlfi8a\_ d4k60a\_ d4dgja\_  
dlmzaa\_ dl0p0a\_ d3tjva\_ dlpytd\_ dlsgfg\_ glgg6.1 d2eeka\_ glrtf.1  
dla0ja\_ d3g01a\_ dlpytc\_ d4e7na\_ dladdja\_ dlz8ga1 d2hlca\_ dlnpma\_  
dlbrup\_ gljou.1 dlsgfa\_ dlautc\_ g2hnt.1 glkdq.1 dlorfa\_ d3s69a\_  
d4crga\_ dlfxya\_ dlra6a\_ dlmuka\_ d3gsza\_ dlte9a\_ d2xwha\_ d3uqsa\_  
d3hkwa\_ d3n6ma\_ d2cjqa\_ d2xyma\_ dlteba\_ dlte8a\_ d1s48a\_ d1u09a1  
d4wfxa\_ d3tyqa\_ d2pgga1 d1m41a\_ d2bk7a\_ d3fjua\_ dlz5ra1 d1kwma1  
dluwy2\_ dljqga1 d2c1ca1 d1dtda\_ d3lgia\_ d3i77a\_ d2z9ia2 d4nsva\_  
dl1cya2 d4jcna\_ dlagja\_ dl0s8a\_ dlhpga\_ dlp3ca\_ dl11ja\_ d1e69a\_  
dlmv5a\_ d3g60a4 gl1i8.1 d1ewqa2 dlji0a\_ dlqhl\_ dl1v43a3 d2wmfa1  
dlvpla\_ dl2912 d4a82a2 glf2t.1 d2d62a1 d3tuic1 d2bbsa1 d3g60a3  
d2ixea\_ dl26ha\_ dlsgwa1 d2qi9c\_ d3rlfa1 d3b60a1 d3d31a2 d2pzea1  
glxew.1 dljj7a\_ dl0xxk2 d2onka1 dlw1wa\_ dliwea\_ dlqf5a\_ d1vmaa2  
dl1nija1 dl1np6a\_ d2p67a1 d3ihla\_ dl0kkd2 dl1s1a2 dl1s1ma2 dliona\_  
d2v40a\_ d3hida\_ d2v01a1 d2g0ta1 dl1vcoa2 dlj8mf2 dl23qa\_ dl1xjca\_  
dlp9ba\_ dlqzxa3 dl1hua2 dl1hual d2qm8a\_ dl1dj2a\_ d4ioja\_ dl1cp2a\_  
dl1yrba2 dl1hya\_ d3gqba2 dl1xp8a1 dl1tf7a2 dl1tf7a1 dl1ye8a1 dl1skyb3  
d2qe7d2 d4blta\_ d4huta\_ d3l1daa2 d4hyya\_ d2i3ba1 dl1cr1a\_ d3j9tb2  
d3ntua2 dl1vdza1 d2z43a\_ dl1e9ra\_ dl1nlfa\_ d3ziaa2 dl1n0wa\_ dl1g6oa\_  
d3ziad2 d3j9ta2 dl1pzna2 d3gqbb2 d2i49a\_ dl1nnfa\_ dl1vxva\_ dl1ursa\_  
dl1h3da1 dl1iuda\_ d4m1va1 dl1twya\_ d3e13x\_ d2nxoa1 d4pfua\_ d3ttma\_  
dl1elja\_ d2qmwa1 dl1us5a\_ dl1y3na1 dl1jeta\_ dl1uqwa\_ d4f19a1 d2esna2  
d3thia\_ d3fasa1 d2uyeb\_ d2xwva1 dl1r91a\_ d2fyia1 dl1pb7a\_ d2ozza1  
dl1sw5a\_ dl1nh8a1 dl1vr5a1 d2g29a\_ dl1xs5a\_ d3lswa\_ d2z23a\_ d3w9va\_  
d3tcha\_ dl1q35a\_ dl1z7me1 d3q27a\_ dl1p99a\_ dl1ve4a1 d2i6ea1 d4mcoa1  
d4n8ya\_ dl1eu8a\_ dl1zbma1 dl1hsla\_ dl1lixca2 dl1j1na\_ dl1xvya\_ dl1y9ua\_  
d2z22a1 dl1xoca1 d4oera\_ dl1wdna\_ d5f1qa1 dl1xt8a1 d4gwoa\_ d4igta1  
dl1pc3a\_ d4mmpa1 dl1o63a\_ d2cz1a1 d2onsa2 d4mija1 d4ok5a1 d2bmfa1  
d2bmfa2 dl1yksa1 dl1yksa2 d2qeqa1 d2j1qa1 dl1a1va2 dl1eh3a\_ d3skpa\_  
dl1dtza1 dl1ieja\_ dl1jnfa2 dl1ce2a1 dl1jnfa1 dl1b1xa2 dl1b1xa1 dl1jw1a1  
dl1jw1a2 dl1ryoa\_ dl1h76a1 dl1h76a2 dl1c4oa1 d2p6ra3 d2p6ra4 dl1oywa2  
dl1oywa3 dl1wrba1 dl1w36b2 dl1w36b1 dl1c4oa2 d3bora\_ dl1t6na\_ d2eyqa5  
d2eyqa3 d2eyqa2 d2zu6a2 dl1veca\_ dl1uaaa1 dl1w36d1 d2g9na1 dl1z3ix2  
d2rb4a\_ dl1hv8a1 dl1hv8a2 dl1t5ia\_ dl1w36c2 d2j0sa2 d2j0sa1 dl1fuka\_  
d3hjha1 dl1z5za1 dl1qdea\_ dl1z63a1 dl1s2ma2 dl1s2ma1 dl1wp9a1 dl1wp9a2  
dl1gm5a3 dl1gm5a4 d3dina4 d3dina3 dl1q0ua\_ dl1w36c1 dl1z3ix1 d1nkta4  
dl1uaaa2 dl1w36d2 gl1qhh.1 d2fwra2 d2fwra1 d3q3ma\_ dl1za0a1 dl1mxra\_  
d2inca\_ dl1jk0a\_ d2incb\_ dl1mhyb\_ d3hf1b\_ dl1mtyb\_ dl1r2fa\_ d2uw1a\_  
dl1mhyd\_ d3n37a\_ dl1afra\_ dl1oquc\_ dl1syya\_ dl1mtyd\_ d2o1za\_ dl1uzra\_  
dl1smsa\_ d2fkza\_ dl1zujal dl1s3qa1 d2fjca1 dl1z6om1 dl1veia\_ d4dyya\_  
dl1jiga\_ d3gvya\_ d2pyba\_ d4cy9a1 d3bvfa1 dl1r03a\_ d2cf7a\_ dl1nf4a\_  
dl1zs3a1 d4iwka\_ d3ka8a\_ d3np0x\_ dl1n1qa\_ dl1lb3a\_ d4e6ka\_ dl1z6oa1

d2fzfa1 d4dyua\_ d3ge4a\_ d1jgca\_ d4am4a\_ d2z6ma\_ d1ji5a\_ d1vlga\_  
d1lkoa1 d3qz3a\_ d1o9ra\_ d2ffxj\_ d1euma\_ d1yv1a1 d2v2pa\_ d1j30a\_  
d4di0a\_ d1dpsa\_ d1oewa\_ d2qzxa\_ d2asia\_ d1psoe\_ d1smra\_ d2h6ta\_  
d1pfza\_ d1lizda\_ d3hd8a\_ d1j71a\_ d1dpja\_ d4aa9a\_ d1t6ex\_ g1b5f.1  
g1lya.1 g1htr.1 d1qdma2 d1bxoa\_ d1wkra\_ d1tzsa\_ d1libqa\_ d2qzwa\_  
d1bdqa\_ d3ggta\_ d3ixoa\_ d1mrxa\_ d2haha\_ d1tw7a\_ d4njsa\_ d1sgua\_  
d2p3da\_ d1nsoa\_ d3d3ta\_ d2rkfa\_ d2rspa\_ d3ogpa\_ d3ekwa\_ d2o4na\_  
d2j9ja\_ d1baia\_ d3ggua\_ d3lzua\_ d4npua\_ d4j55a\_ d2r8na\_ d2fxda\_  
d2p3ca\_ d4dqa\_ d3ttpa\_ d3t3ca\_ d2p3aa\_ d2hc0a\_ d2fdda\_ d3mwsa\_  
d1wgda1 d1wgg1 d4q5eb\_ d1wjna1 d1se9a\_ d3n3kb\_ d1wz0a1 d1we6a1  
d2m0xa\_ d2gbka\_ d3rt3b1 d1wh3a1 d1sifa\_ d2ekek2 d4ii2b1 d4hk2a1  
d1c3ta\_ d1m94a\_ d1wgha1 d1ttna1 d1j8ca\_ d1wx8a1 d3v6cb1 d2ma9b\_  
d4i61b1 d1bt0a\_ d2jvca1 d1iyfa\_ d2k1fa\_ d1wxva1 d1wf9a1 d1t0ya\_  
d2io0b2 d1x1ma1 d2gbma\_ d1zw7a1 d2m17a\_ d1we7a1 d2lwp1 d2gbja\_  
d1wjua1 d1v6ea1 d1v86a1 d4eewa\_ d1wiaa1 d4icva\_ d4gu2a\_ d1wx7a1  
d1wy8a1 d4hjka1 d2faza1 d1v5oa1 d2a13a1 d2cr5a1 d1wj4a1 d1s3sg\_  
d3ubra\_ d1qo8a1 d1d4ca1 d2k3va\_ d1ft5a\_ d1qdba\_ d1m1qa\_ d2j7aa\_  
d1h21a\_ d1ogyb\_ d4fasa\_ d1jnia\_ d1oaha\_ d1sp3a\_ d1yvca1 d1yeza1  
d1qoza\_ d5ajha1 d4lu0a\_ d1of8a\_ d3unda1 d3e9aa1 d1vr6a2 d2qkfa\_  
d1d9ea\_ d1o60a\_ d2h0ba\_ d2erfa\_ d1h30a2 d1h30a1 d3mw4a1 d2r1ba\_  
d3v64a1 d1d2sa\_ d3bopa1 d3mw3a1 d1okqa1 d1okqa2 d1iyka2 d1rxta1  
d1iica2 d1iica1 d1dszb\_ d3cbba\_ d1ynwa1 d1r4ia\_ d1hcqa\_ d2hana\_  
d2hanb\_ d2enva1 d1kb4b\_ d2n11b\_ d1lo1a\_ d1cita\_ d1lum8a\_ d1ixza\_  
d1qvra2 d1qvra3 d1qzma\_ d1sxjc2 d1jr3d2 d2p65a\_ d1l8qa2 d1g8pa\_  
d3hu3a3 d1sxjd2 d1njfa\_ d1in4a2 d1sxja2 d1tuea1 d2ce7a2 d1w5sa2  
d1sxjb2 d1d2na\_ d1ny5a2 d1ofha\_ d2gnoa2 d2a5yb3 d1fnna2 d1u0ja1  
d1lv7a\_ d1iqpa2 d2fnaa2 d1ixsb2 d4gita\_ d1sxje2 d1g41a\_ d1svpa\_  
d3su6a1 d1cula1 d4agka\_ d1vcpa\_ d1q31a\_ g1n11.1 d3e90b\_ d1ep5a\_  
d3u1jb\_ d2e3fa\_ d1mm0a\_ d2e3ea\_ d2l1da\_ d2ny8x\_ d2e3ga\_ d2ny9x\_  
d2nz3a\_ d2l1j7a\_ d1n4na\_ d2m8bb1 d2kyqa\_ d3psma\_ d1jkza\_ d1jxca\_  
d2g11a\_ d1ug1a\_ d4uj0a\_ d2k4ua\_ d1hp2a\_ d2lu9a\_ d1baha\_ d2meoa1  
d1wm7a\_ d1hlya\_ d1n8ma\_ d1jlza\_ d1wpda\_ d1c55a\_ d1pvza\_ d1wt7a\_  
d1wz5a\_ d1m2sa\_ d1pjva\_ d1c49a\_ d1qkya\_ d2ktca1 d1wmta\_ d1du9a\_  
d1j5ja\_ d1r1ga\_ d1t0za\_ d2i61a\_ d1t1ta\_ d1sn4a\_ d1kv0a\_ d2lkba\_  
d1npia\_ d1wwna\_ d1pe4a\_ d2kbka\_ d2li7a\_ d1djta\_ d2kbha\_ d1dq7a\_  
d1sega\_ d1omya\_ d1zywa1 d1jzaa\_ d1n9wa1 d1bbua1 d1e1oa1 d1b8aa1  
d1l0wa1 d3a74a1 d1eova1 d1iyjb4 d1iyjb5 d1iyjb3 d1o7ia\_ d4ipca1  
d1x3ea\_ d4apva\_ d1jb7a1 d1jb7a2 d1jb7a3 d3kdfa\_ d1ue1b\_ d1wjja1  
d3eiva\_ d1xjva2 d1xjva1 d2ccza2 d1se8a\_ d1l1loc\_ d1jb7b\_ d1qvca\_  
d1qzga\_ d1m1ua4 d1m1ua5 d1m1ua3 d3ubub\_ d1legia\_ d1qo3c\_ d1v7pa\_  
d1tdqb\_ d3ubua\_ d1c3ab\_ d1h8ua\_ d3bx4b\_ d1t8ca1 d1sb2a1 d1qdda\_  
d2ziba1 d3cada\_ d1j34b\_ d1jwia\_ d1jzna\_ d1c3aa\_ d1oz7b\_ d1wmza\_  
d3bdwb\_ d1hq8a\_ d1fifa1 d1dv8a\_ d3hupa\_ d1wk1a1 d1lumra\_ d2afpa\_  
d3bx4a\_ d1gz2a\_ d1sl6a\_ d1v7pb\_ d3g8ka\_ d1ixxa\_ d1j34a\_ d1jwib\_

d1g1sa1 d1y17a1 d1ja3a\_ d1fvub\_ d3bdwa\_ d1sb2b1 d1fvua\_ d1umrc\_  
d1oz7a\_ d4m17a\_ d3cfwa1 d1ypqa1 d1g1ta1 d3fd4a\_ d3l9jc\_ d4dn8a1  
d1v4lb\_ d1rdl1\_ d2msba\_ d1prtc2 d1prtb2 d1ohea2 d2f4da\_ d1rxda\_  
d2hxp\_a\_ d1xria\_ d1d5ra2 d1fpza\_ d3ezza\_ d4y2ea\_ d1i9sa\_ d3azya\_  
d3wvja\_ d1upsa1 d1ajoa\_ d2hyka\_ d1ajka\_ d2vy0a\_ d1o4ya\_ d3o5sa\_  
d3d6ea\_ d3atga\_ d1dypa\_ d3i4ia\_ d1tdha3 d1q3ba3 d1ee8a3 d1k82a3  
g1qmo.1 g1len.1 d3zyra\_ d1fnya\_ d1n47a\_ g2ltn.1 d1avba\_ d3usua\_  
d1dhkb\_ d1f9ka\_ d1lukga\_ d1g8wa\_ d1g9fa\_ d1wbfa\_ d3wcsa\_ d1g7ya\_  
g1loe.1 d1mvqa\_ d1hq1a\_ d1v6ia\_ d1dbna\_ d1fx5a\_ d4l8qa\_ d1ioaa\_  
d3n35a\_ d1epwa1 d3h33a\_ d1rwja\_ d19hca\_ d1os6a\_ d3bxua\_ d3h4na\_  
d1i77a\_ d1j0pa\_ d2ctha\_ d1duwa\_ d1ofwa\_ d2e84a\_ d1hh5a\_ d1gyoa\_  
d3h34a\_ d1wioa4 d1ccza2 d1vcaa1 d1dr9a2 d1ic1a1 d2d9qb1 d2nxyb2  
d2dara2 d2dara1 d1wyha2 d2dloa2 d1rutx4 d1rutx3 d2cuqa2 d1x4la2  
d1x4la1 d1x3ha2 d1x3ha1 d2d8za1 d1x61a2 d1x6aa1 d1x6aa2 d2cora2  
d2cora1 d1v6ga1 d1v6ga2 d2d8za2 d1x64a1 d1x64a2 d1b8ta1 d2co8a1  
d1x63a2 d2dj7a2 d2dj7a1 d2cu8a2 d2cu8a1 d1g47a2 d1g47a1 d1j2oa1  
d1wyha1 d2dloa1 d1wiga1 d1wiga2 d2cupa2 d2cupa3 d1x68a1 d2d8ya2  
d2d8ya1 d1m3va2 d1x62a1 d1x68a2 d1x61a1 d1b8ta3 d1b8ta2 d2d8xa2  
d2d8xa1 d1x4ka1 d1x4ka2 d2cuqa1 d1m3va1 d2co8a2 d1j2oa2 d1x63a1  
d2cura1 d2cura2 d1x62a2 d1op9a\_ d1y01a1 d1etzb1 d1egj11 d2gsib1  
d1nj9a1 d4jfhd1 d1aqk11 d1t2ja\_ d1l04h1 d1zvya1 d3v4v11 d4enec1  
d1kxtb\_ d5e8ea1 d2pxya\_ d4weud\_ d1xiwc\_ d2esvd1 d1qznh\_ d1ogae1  
d1f4xh1 d4n1hb\_ d3ezjb1 d3mlw11 d1kfah1 d1etza1 d1b4jh1 d3cfic\_  
d4w68a\_ d2arja1 d1ek3a\_ d2ok011 d1vera\_ d1uwgh1 d1blnb1 d1fpth1  
d1rzga1 d2giya1 d4m3kb1 d1nc2a1 d2nyyd1 d1ncna\_ d1fbih1 d5dxwa\_  
d4fqqa1 d1dqdh1 d1jfq11 d1kelh1 d1faih1 d1frgl1 d1figl1 d4m6n11  
d1fo0a\_ d4hxb11 d3b5ga\_ d3quyd1 d2h9gb1 d1i8kb\_ d2dd8h1 d2ck0h1  
d1eaja\_ d4w6wb1 d2a6ib3 d1t66d1 d2e27h\_ d1ob1b1 d1f11b1 d2v7na1  
d1ad0a1 d2xt1b1 d1pskh1 d4i13b1 d2op411 d1a0q11 d1uwel1 d1za3a1  
d1ncb11 d4uu9a\_ d1bm3h1 d1cloh1 d1nqba2 d1cf8h1 d4y5va\_ d1mhph1  
d5anma1 d4cdgc1 d4ldeb\_ d1y01b1 d2pcpb1 d1z3gl1 d1dfb11 d1fh5h1  
d3g5xa1 d1tzib1 d4dn311 d3zhka1 d2b1hh1 d2uyla1 d1f3dh1 d1nj9b1  
d2agjh1 d2h1pl1 d1q72h1 d8fabb1 d1ndmb1 d1rjca1 d4u6hb1 d3upca\_  
d2fbj11 d1osph1 d1tvda\_ d2cjh\_ d4fhbd1 d1bd2d1 d1rz7h1 d3nn8a\_  
d1blna1 d1knoa1 d1nfdal d2bmkb1 d1dq11\_ d1igyb1 d1igfl1 d12e8h1  
d3utzal d1nc2b1 d1rihh1 d4mwfb1 d4jvpa1 d1mieh1 d1rhfa1 d1fgn11  
d1sbsh1 d1lp9e1 d1dn0a1 d4lqf11 d1iaih1 d1kgcd1 d1mh5b1 d1gp011  
d2g60h3 d1f8t11 d2jixd1 d4grwh\_ d1fo0b\_ d1bfob1 d1axsa1 d1u9ka\_  
d1nmbh\_ d1h8na1 d1h8na2 d1jguh1 d4eura1 d3sdy11 d35c8h1 d1w7211  
d1mvub\_ d1i9rh1 d1ob1a1 d4wenb\_ d1yeeh1 d3ietc1 d1f58h1 d1ad0b1  
d1mqk1\_ d1nbvh1 d4b50a\_ d3r8bb\_ d1baf11 d1mamh1 d4rgne1 d2gsgb\_  
d35c811 d1bafh1 d1ailh1 d2pcpa1 d2fath1 d2x1pa\_ d1orsb1 d1libgl1  
d1shma\_ d1a2yb\_ d1u0qa\_ d2coqa\_ d1hilb1 d1qfwi\_ d1jv5b\_ d1fn4b1  
d5e0qa\_ d1nsh1 d1plgl1 d4ocx11 d1kb5h1 d1rzfh1 d1pg7x1 d2fx7h1

d2oi9c\_ d1l7i1l d3eyva1 d1d5i1l d4ffyl\_ d1tet1l d1a6wh\_ d1ac6a\_  
d3dvfa\_ d1nfde1 d1mimh1 d1ri8a1 d1jhlh\_ d3dura\_ d1fskb1 d1f97a1  
d3so3b1 d2ak4d1 d1lp9f1 d4z7wf1 d1l7th1 d4y5ya\_ d4x7ec1 d1emth1  
d1likf1l d1nlbh1 d4utal1 d1bjma1 d1eapb1 d1u6ah1 d2dtgd1 d1kj2b\_  
d1xeda1 d1c1eh1 d1fgvh\_ d2bnub1 d2fb4h1 d2dtgb1 d1ktrh\_ d1jpth1  
d1qkz1l d4hepg\_ d2atpb1 d1flrh1 d2hrpl1 d1mvfa\_ d1iaim1 d3k80a1  
d2jb5h1 d3zkxc\_ d4grwe\_ d1it9h1 d1rhhb1 d3w9ec\_ d1e4wh1 d1sy6h1  
d2j6eh1 d3qxta\_ d1jglh1 d1p7ka1 d1tzhb1 d4n8pa1 d1gaf1l d2jelh1  
d1wioa2 d4i0cc1 d1cicb1 d1lmka2 d1lmka1 d1iqwh1 d1lorqb1 d1ejoh1  
d1jnlh1 d4zg1a\_ d43c9b\_ d1ggbl1 d1wejh1 d3q6fa1 d1f3dj1 d3c6la1  
d1bqlh1 d3p9wb\_ d1a3r1l d1h0db1 d2uzil\_ d1eo8l1 d1qfwl\_ d1n7ml1  
d1igja1 d1c5ch1 d2a9mh\_ d1rmfh1 d1fj1b1 d4heme\_ d1ccza1 d1a5fh1  
d1ogad1 d1dlfh\_ d1qa9b\_ d1vgel1 d3qskb\_ d1sjxa\_ d4ozfg1 d1sq2n\_  
d1qd0a\_ d1kcvh1 d1c5db1 d3qcull1 d8faba1 d3bn9d1 d1mjuh1 d4y8dc\_  
d7fabh1 d3dvgb1 d1l00l1 d1a6tb1 d1gigh1 d1kcrh1 d2hwz1l d1yjdc1  
d3clfl1 d4krna\_ d1d17l\_ d1e6o1l d1mexh1 d3r0ma\_ d4kkna\_ d1fnsl1  
d1oaqh\_ d1rzia1 d1lucbh1 d1ncw1l d4b41a\_ d1nfdfl d2mpah1 d2d7tl1  
d4grwf\_ d4b5ea\_ d1lk3h1 d3u79a\_ d4u3xa\_ d1ghfl1 d1bvkb\_ d1mcww1  
d1b88a\_ d1jrhh1 d32c2b1 d4wemb\_ d1dsfh\_ d1op3h1 d1ce1l1 d1iqda1  
d1qoka1 d1qoka2 d1qfuh1 d2crya1 d1ay1h1 d1oaql\_ d3ab0b\_ d1rur1l  
d1t4kb1 d1bz7b1 d1n0xh1 d1for1l d1lucb1 d4w6yb\_ d43c9a\_ d2aab1l  
d1tzia1 d4n1ca\_ d1k6qh1 d3g9ab\_ d4tvsa1 d1igmh\_ d1pz5b1 d3dx9a1  
d3wxwh\_ d1nakh1 d1kcul1 d3eaka\_ d4qlra1 d1cr9l1 d1d9ka\_ d1f4xl1  
d1deea1 d2i27n2 d1c12a1 d2orb1l d1j8hd1 d1mcph1 d1c5da1 d1kenh1  
d1bd2e1 d1h5ba\_ d4x7fc1 d3upaa\_ d1t3fa1 d1indh1 d2dtgc1 d4hc1l1  
d1zv5a1 d4wgvb\_ d1uwgl1 d4f37k1 d1aqkh1 d1vesa\_ d3zkqd\_ d1fpt1l  
d1l04l1 d1knob1 d3rrqa\_ d1ct8b1 d4orz\_ d1mlbb1 d4hgkc1 d1dqdl1  
d1bogb1 d4ozhe1 d1dr9a1 d1i7za1 d1dn0b1 d1kell1 d1rzi1l d1ypzf1  
d1wtla\_ d1hkfa\_ d1fail1 d1figh1 d2vyre\_ d1sjva\_ d1ohqa\_ d1bfoa1  
d1pkqb1 d1mjul1 d1b4j1l d1nsn1l d2arjb1 d1p4bh\_ d4aj0a\_ d3nn8b\_  
d2rcja1 d1f2xk\_ d4v1dd\_ d1adqh1 d2eksa\_ d4k3ga\_ d1jfqh1 d1uweh1  
d1frgh1 d4gftb\_ d1uz8b1 d4n1ea\_ d1bm3l1 d1clo1l d3mcka1 d2vq1a1  
d1ae6h1 d4aq1b1 d1uj3b1 d1nbqa1 d1fh5l1 d2ck0l1 d2ywza\_ d1q72l1  
d4nxbx\_ d1hila1 d4hz1b1 d2j88l1 d1zmya1 d1cd0a\_ d1a4ka1 d1pskl1  
d1a0qh1 d4krmb\_ d1ncbh1 d2fbjh1 d1j8he1 d1i3ua\_ d1cf8l1 d1fe8h1  
d2plya1 d1eeqa\_ d2x89a\_ d1o10a\_ d2r0lh1 d1ub5a1 d1dfbh1 d3eyvb1  
d4jdvb1 d4p2cg\_ d2gsia1 d2agj1l d1u3ha1 d2h1ph1 d1rih1l d1fskc1  
d1boga1 d2a77l1 d1osp1l d1qfoa\_ d3dwta\_ d2fx7l1 d1rz7l1 d3stba1  
d1pkqa1 d1b6da1 d1dzba2 d1dzba1 d1kj2a\_ d4l1ha\_ d1rzgb1 d1dq1h\_  
d12e8l1 d1mie1l d1jmaa\_ d1sbs1l d1fgnh1 d1f58l1 d1mqkh\_ d1ndgb1  
d3qeg1l d1iail1 d2aw2a1 d1tqbc1 d3fo2a1 d4dkaa\_ d1f8th1 d2g60l1  
d2ywya\_ d1uj3a1 d1yc7a\_ d3bd3a\_ d4w6xb1 d1nmb1\_ d1i8ka\_ d1rjlb1  
d1ypze1 d1p7kb1 d1kxqe\_ d1gpoh1 d2z4qa1 d1w72h1 d1i9rl1 d4qgya1  
d4xt1c\_ d2qqnh1 d1cica1 d3c08h1 d2cd0a\_ d2bdnh1 d1hnga1 d1mam1l

d1nldh1 d1cr9h1 d4lcih1 d3bkylh1 d3qg7l1 d1ai1l1 d1kxvc\_ d4iosd\_  
d1l7ih1 d2x1qa\_ d1ub6b1 d3k74b\_ d1libgh1 d1teth1 d1igya1 d1hxma1  
d2x6ma\_ d2e7la\_ d5e03a\_ d1qfwm\_ d2r0kh1 d1igjb1 d1rurh1 d1plgh1  
d1mj8h1 d1yuhb1 d3fmg11 d1rzfl1 d1emt11 d1ad9b1 d1igtb1 d1nlb11  
d1d5ih1 d3k7ua\_ d4ffyh\_ d1bwwa\_ d3dvga1 d1a6ta1 d1fgvl\_ d4qxgl1  
d1mim11 d1jhl1\_ d2hffb1 d2hh0l1 d1qkzh1 d1l7t11 d1afvh1 d1iaii1  
d2cjuh\_ d1um5h1 d2ghwb2 d2ghwb1 d1kgce1 d2fgwh1 d1ikfh1 d1dvfd\_  
d2i24n1 d2xtjb\_ d1za3b1 d2yc1a\_ d2hh0h1 d2x1oa\_ d1bvka\_ d1rjla1  
d5e7ba1 d1igta1 d1il1b1 d2fb4l1 d1mvua\_ d1jpt11 d32c2a1 d1fvca\_  
d1iqdb1 d2hrph1 d2p4ab\_ d4qo1a\_ d1p2cb1 d1wt5c\_ d1t4ka1 d5c1mb\_  
d1it9l1 d1bz7a1 d1b2wh1 d1e4wl1 d1jnl11 d1yedb1 d1za6b1 d3u7aa\_  
d1igfh1 d3gnml1 d1orsa1 d1wejl1 d1a2ya\_ d1hxmb1 d1gafh1 d2j4wh1  
d1pz5a1 d1j05a\_ d1a3rh1 d4fq1l1 d1qfwh\_ d1eo8h1 d1n7mh1 d4s11a\_  
d1kegh1 d5da4a\_ d1iqwl1 d3whxb1 d1vgeh1 d1deeb1 d1c12b1 d1t2q11  
d1ad9a1 d3gsnb1 d3b2uc1 d1ggbh1 d1t3fb1 d1nak11 d4ocmc\_ d1lila1  
d2v7hb3 d2esve1 d1mcoh1 d2qr0b1 d2q3aa\_ d1ct8a1 d1kcrl1 d2pxyb\_  
d2uzih\_ d5c3ld\_ d3durb\_ d2ak4e1 d1d17h\_ d1xiwd\_ d1mlba1 d1rmfl1  
d1i7zb1 d1dlfl\_ d2xa3a\_ d5bq7b1 d1dqqb1 d3h42l1 d1egjh1 d1kcvl1  
d1fe8l1 d2j6e11 d1f3rb2 d1lk3l1 d1sm3h1 d1q0xh1 d1ghfh1 d7fab11  
d1igch1 d1lo0h1 d4idla\_ d5c2b1\_ d1jrh11 d1il1a1 d3zhda1 d4kfzc\_  
d1b0wa\_ d1e6oh1 d1mexl1 d4krpb\_ d1fnsh1 d1ncwh1 d4hgma\_ d4eigb1  
d4rzca\_ d2mpa11 d4y5xa\_ d5en2b1 d3lrga1 d4ej1c1 d1rhha1 d1j05b\_  
d1forh1 d1q9wb1 d2wzpd\_ d2aq2a1 d1h0da1 d3revb1 d2ij0c1 d1tzh11  
d4m7j11 d1k6q11 d3b9kc1 d1igml\_ d3qeua1 d1dsfl\_ d1ce1h1 d1kcuh1  
d1zvha1 d1zvoa1 d1tqbb1 d1ay1l1 d2qsc11 d2cgrh1 d1n10h1 d1ken11  
d3eo0a1 d4n9ob1 d1n0xl1 d3k1kc\_ d2cqva1 d2k1ma\_ d2dl2a1 d1biha3  
d1biha1 d1biha4 d3qp3a1 d1g1ca\_ d1gxea\_ d1cvsc2 d1cvsc1 d1xmwa2  
d1m4ka2 d2otpa2 d1biha2 d1rhfa2 d2fcba2 d2fcba1 d1wwbx\_ d1gsma2  
d1epfa1 d1epfa2 d2dava1 d1waaa\_ d1f97a2 d1x44a1 d1vcaa2 d1fnla2  
d1fnla1 d3b5ha2 d3h8na2 d3h8na1 d1bjba1 d1bjba2 d1pd6a\_ d1f2qa2  
d1f2qa1 d3cx2a\_ d1nbqa2 d3b5ha1 d1n26a1 d1xiwb\_ d1xaua\_ d1fltx\_  
d2ifga1 d1olla1 d1olla2 d1cs6a4 d1cs6a3 d1cs6a2 d1cs6a1 d2gw5a2  
d1sy6a1 d1xiwa\_ d1lucta2 d1lucta1 d1ry7b2 d1gl4b\_ d1qz1a3 d1olza1  
d2c9aa1 d1wwca\_ d2aq2b1 d1ck1a1 d1lenfa1 d1i4pa1 d1vloa1 d1et9a1  
d1esfa1 d2g9hd1 d4ohja1 d1bxta1 d1eu3a1 d1ty0a1 d1fnua1 d1c4qa\_  
d1prtcl d2wv6d\_ d1prtfl\_ d1ltrd\_ d4l63b1 d1r4pb\_ d1prtd\_ d1tl0f\_  
d2bosa\_ d1prtb1 d3chbd\_

**Family-51 (c.2.1.3)**

**Positive dataset contains 20 protein sequences.**

d2nvwa1 d1u8fo1 d1ydwa1 d2g17a1 d2czca2 d1r0ka2 d2cvoa1 d1zh8a1  
d2q49a1 d3pzra1 d1xeaa1 d1vkoa1 d1vm6a3 d3qvsa1 d2pkqo1 d3pwka1  
d2hjsa1 d1zyao1 d1vkna1 d1tlta1

**Negative dataset contains 3802 protein sequences.**

d1m32a\_ d1libja\_ d1c7na\_ d1iuga\_ d4q75a\_ d2bkwa1 d1t3ia\_ d1n8pa\_

d1qz9a\_ d1jff9a\_ d1leg5a\_ d1p3wa\_ d3kgwa\_ d1cl1a\_ d2ctza1 d1vjoa\_  
d2rfva\_ d1gc0a\_ d1cs1a\_ d1d2fa\_ d2ch1a1 d1qgna\_ d1pffa\_ d1elua\_  
d1ax4a\_ d1c7ga\_ d2v1pa1 d2ez1a\_ d1u08a\_ d1lc5a\_ d2ay1a\_ d1bw0a\_  
d3pd6a\_ d7aata\_ d2csta\_ d1j32a\_ d1fg7a\_ d4wlha\_ d1o4sa\_ d1v2da\_  
d1gdea\_ d1m6sa\_ d1v72a1 d1svva\_ d1ajsa\_ d1wsta1 d2f8ja2 d1lk9a\_  
d1vp4a1 d1xi9a1 d2gb3a1 d1yaaa\_ d3i2ka1 d1lnsa3 d1mpxa2 d2cfba1  
d1o69a\_ d1bj4a\_ d3k28a\_ d2bwpa\_ d3lg0a\_ d2fnua\_ d3ou5a\_ d1z7da1  
d1b9ha\_ d1iaya\_ d4msoa\_ d1bs0a\_ d1s0aa\_ d1sffa\_ d3tqxa\_ d1mdoa\_  
d3qboa\_ d3pgya\_ d1bjna\_ d2dkja\_ d1ejia\_ d1vefa1 d4wxga\_ d3bs8a\_  
d3gbxa1 d1w23a\_ d4nmwa\_ d1dd1a\_ d1e57b\_ d1auyb\_ d1fwxa1 d1libya\_  
d1f56a\_ d1bypa\_ d1azca\_ d1ws8a\_ d3u25a\_ d1cuoa\_ d1lid2a\_ d1rkra\_  
d2iaac\_ d4dp1x\_ d1nwpa\_ d2gima\_ d2i7sa\_ d1qhqa\_ d3ehbb1 d1fftb1  
d1gyca3 d1hfua2 d1kbva1 d1kbva2 d1sdda1 d1sdda2 d1gyca1 d1gyca2  
d1mzya1 d2bw4a1 d1aoza1 d1aoza3 d1aoza2 d1kyaa2 d1kyaa3 d1kyaa1  
d1mzya2 d4e9sa1 d1sddb1 d1sddb2 d1hfua1 d1hfua3 d1oe1a2 d1oe1a1  
d1v10a2 d1v10a3 d1v10a1 d2dara2 d2dara1 d1wyha2 d2dloa2 d1rutx4  
d1rutx3 d2cuqa2 d1x41a2 d1x41a1 d1x3ha2 d1x3ha1 d2d8za1 d1x61a2  
d1x6aa1 d1x6aa2 d2cora2 d2cora1 d1v6ga1 d1v6ga2 d2d8za2 d1x64a1  
d1x64a2 d1b8ta1 d2co8a1 d1x63a2 d2dj7a2 d2dj7a1 d2cu8a2 d2cu8a1  
d1g47a2 d1g47a1 d1wyha1 d2dloa1 d1wiga1 d1wiga2 d2cupa2 d2cupa3  
d1x68a1 d2d8ya2 d2d8ya1 d1m3va2 d1x62a1 d1x68a2 d1x61a1 d1b8ta3  
d1b8ta2 d2d8xa2 d2d8xa1 d1x4ka1 d1x4ka2 d2cuqa1 d1m3va1 d2co8a2  
d1j2oa2 d1x63a1 d2cura1 d2cura2 d1x62a2 d1xkta1 d2hfka\_ d1jmkc\_  
d5d3ka\_ d3sxwa1 d1j3qa\_ d4luka\_ d1a3qa1 d1iknc\_ d3brda1 d1p7h11  
d1oy3c\_ d1imhc1 d1zk9a1 d2cxka1 d2bema\_ d1pama1 d1ea9c1 d1qhoa1  
d2fhfa2 d2fhfa1 d1k3ia1 d1j0ha1 d1cxla1 d2bhua1 d1ledqa1 d1f1sa2  
d1ut9a2 d1gvia1 d1txka1 d4alac\_ d1rera1 d1s6na\_ d3uzqb\_ d2phla2  
d2phla1 d1fxza2 d1fxza1 d1lrha\_ d1uija1 g1dgw.1 d2v09a\_ d1uika2  
d1uika1 d1dgwa\_ d1zbf1a1 d2z1ha\_ d2etja1 d3qioa1 d1j11a\_ d2e41a\_  
d1j12a\_ d2lsna1 d1io2a\_ d1uaxa\_ d2yv0x\_ d1mu2a1 d1ekea\_ d1i39a\_  
d1ds6b\_ d1fstb\_ d2b5ea2 d2b5ea3 d2b5ea1 d2b5ea4 d2kp1a1 d2kp2a1  
d1hyua3 d1hyua4 d1j08a1 d2bjca1 d2hsga1 d1qpza1 d1efaa1 d1ydwa2  
d2nvwa2 d1zh8a2 d1qkia2 d1xeea2 d1tlta2 d1r0ka3 d1j5pa3 d1vkoa2  
d1vm6a2 d3qvsa2 d1gr0a2 d1p1ja2 d2ovga\_ d1sq8a\_ d1rzsa\_ d3kz3a\_  
d3orca\_ d3gpdg2 d2q49a2 d1hdgo2 d2g17a2 d2cvoa2 d2czca1 d3pwka2  
d1obfo2 d1i32a2 d1zyao2 d2pkqo2 d1b7go2 d2hjsa2 d1cf2o2 d1vkna2  
d1nvm2 d4lt9a1 d3tc7a1 d3hoja\_ d1i4na\_ d3vnda\_ d3n18a1 d1geqa\_  
d3nava1 d1v5xa\_ d4a2ra1 d3tc6a1 d1ujpa\_ d4ijba\_ d1xcfa\_ d1vc4a\_  
d1rd5a\_ d1qopa\_ d3b5va\_ d2msya\_ d2djoa1 d2r5za\_ d1au7a1 d1f43a\_  
d2lmda1 d1akhb\_ d1s7ea1 d3nara\_ d1zq3p1 d2craa1 d1mija\_ d4uuta\_  
d3a01a\_ d1x58a1 d3rkqa1 d3cmya1 d2cqxa1 d2da6a1 d1e3oc1 d1fj1a\_  
d1mh3a1 d1ig7a\_ d1x41a1 d1wh7a1 d1gt0c1 d2mw8a\_ d1lfup\_ d1x2ma1  
d1b72a\_ d1wi3a1 d1jgga\_ d1wjha1 d1x2na1 d1mnmc\_ d2cuea1 d3k2aa\_  
d2hosa\_ d2jwta2 d1pufa\_ d1oact1 d2hi3a\_ d1b8ia\_ d4j19a\_ d3lnqa\_

d1wh5a1 d1b8ib\_ d1fexa\_ d2cqra1 d1guua\_ d1ug2a1 d2cqqa1 d2ajea1  
d4a69c\_ d1h8ac1 d2crga1 d2iw5b1 d1xc5a1 d1ofcx1 d2cu7a1 d1wgxa1  
d2cjj1a1 d2ckxa1 d1hcra\_ d1tc3c\_ d1gdta1 d1u78a2 d6paxa1 d6paxa2  
d1k78a1 d1hlva1 d1hlva2 d1liufa2 d3lv8a\_ d1s3ga1 d1zaka1 d1s4qa\_  
d3tvta2 d1uf9a\_ d1khta\_ d1ckea\_ d1osna\_ d1p5zb\_ d4tmka\_ d3cm0a\_  
d1tmka\_ d1jaga\_ d3h86a\_ d1t0hb\_ d1nn5a\_ d2h92a\_ d3kb2a1 d2c95a1  
d1yj5a2 d1kgda\_ d1ly1a\_ d2ak3a1 d1vyva2 d1deka\_ d2grja1 d1p3ja1  
d1y63a\_ d1e4ya1 d1s96a\_ d3iija1 d1lvga\_ d1nksa\_ d1vyua2 d4e22a\_  
d1qf9a\_ d1jjva\_ d1q3ta\_ d1ki9a\_ d1lw7a2 d1teva\_ d1kjwa2 d1gsia\_  
d2iyva2 d1viaa\_ d1e6ca\_ d1g3ma\_ d1j99a\_ d1t8ta1 d1nsta\_ d1zrha\_  
d1ls6a\_ d2a3ra\_ d1aqua\_ d2zptx\_ d3ckla\_ d1teta\_ d1q44a\_ d2gwha\_  
d1odfa\_ d1uj2a\_ d4gi7a\_ d2jeoa1 d1rz3a\_ d1z0ja1 d3umra2 d3gj0a1  
d2gaoa1 d1yzga1 d1x3sa1 d1g7sa4 d1puja\_ d1udxa2 d1kk1a3 d2o52a\_  
d1jwyb\_ d1zcaa2 d1zcba2 d2fv8a1 d2cjwa\_ d3dz8a1 d1xzpa2 d1vg8a\_  
d4qxaa\_ d2ew1a1 d1x1ra1 d2bcgy\_ d3doea1 d3cona\_ d3rega\_ d3wyga\_  
d1upta\_ d2b6ha1 d1zd9a1 d1lnza2 d1r5ba3 d1n0ua2 d1r2qa\_ d2f91a1  
d2rhda\_ d3q3jb\_ d3q85a\_ d1efma1 d1r8qa\_ d2gf9a1 d2akab1 d1ek0a\_  
d1z08a1 d2gcoa1 d2dyla2 d4g01b\_ d2cxxa1 d1svia\_ d3q72a\_ d1ni3a1  
d4ac9a4 d2erxa1 d2bmea\_ d1wxqa1 d2gf0a1 d4ldja1 d1zunb3 d4lv5b\_  
d1efca3 d1kmqa\_ d2g6ba1 d3lrpa\_ d1tada2 d2y8ea\_ d4rd4a1 d1z06a1  
d2heia\_ d3a58b\_ d1u0la2 d1d2ea3 d1zj6a1 d2ocba\_ d3rwoa\_ d1mr3f\_  
d2e9sa1 d4u5xa1 d2iwra\_ d2fn4a1 d3bwdd\_ d2nzja1 d2atva1 d2ksqa\_  
d3l43a\_ d1mkya2 d1mkya1 d1wmsa\_ d1jnaya3 d2rmka\_ d1f6ba\_ d1f60a3  
d1gota2 d1jala1 d2fh5b1 d1g16a\_ d2wblc\_ d1m7ba\_ d1wf3a1 d1f5na2  
d1t9ha2 d1z6xa1 d1z0aa1 d2fg5a1 d2a5ja1 d2bcjq2 d1s0ua3 d1ky3a\_  
d4y0va\_ d4lhwa\_ d2qmea1 d2atxa1 dlegaa1 d1ryha\_ d1moza\_ d1nrjb\_  
d2erya1 d3bfka\_ d1puia\_ d1fzqa\_ d3j3az1 d3t5ga\_ d1shza2 d3defa\_  
d2f7sa1 d3raba\_ d3tsoa\_ d3aq4a\_ d2a17a1 d3sfva1 d3bc1a\_ d1y4wa1  
d3vrda1 d3vrda2 d1fcdc2 d1fcdc1 d1h1oa2 d1m70a2 d1m70a1 d1iqca2  
d1iqca1 d1eb7a1 d1nmla2 d1nmla1 d3h1jd1 d1hroa\_ d4gedb\_ d3zooa\_  
d1mz4a\_ d1gu2a\_ d1f1fa\_ d1dvva\_ d1c6ra\_ d1c75a\_ d1e29a\_ d1gdva\_  
d1cnoa\_ d1h32b\_ d1co6a\_ d2bh4x\_ d2aiua\_ d5cytr\_ d1jdl1a\_ d1i8oa\_  
d2zboa\_ d3dmia\_ d1ls9a\_ d1wvec\_ d2yk3a\_ d3ph2b\_ d1dw0a\_ d5aura\_  
d1ql3a\_ d1qn2a\_ d1f1ca\_ d4zzva\_ d2xspa\_ d1eg1a\_ d4v20a\_ d1ojja\_  
d4ipma1 d4csia\_ d3pfza\_ d3ovwa\_ d2yoka\_ d2nqya\_ d1h4ga\_ d1hixa\_  
d1oa2a\_ d1olra\_ d3b7ma\_ d4h7ma1 d3wp3a\_ d2vgda\_ d1igoa\_ d3zsea\_  
d2nlra\_ d3wx5a\_ d1oa3a\_ d1pvxa\_ d1f5ja\_ d1oa4a\_ d1ks5a\_ d4ix1a1  
d2ah2a1 d1n1ta1 d1evsa\_ d1cnt1\_ d1pvhb\_ d1z7ca\_ d1huwa\_ d1bgea\_  
d1rhga\_ d1f6fa\_ d1i1rb\_ d1axia\_ d1letea\_ d3tgxb\_ d2z3qa1 d3qb1a\_  
d1hula\_ d1m48a\_ d4nkqb\_ d1eera\_ d1v7mv\_ d5e4ea\_ d2o27a\_ d3b5ka\_  
d2psma1 d4zf7a\_ d3uf5a\_ d4x51a\_ d4ypgc1 d3oq3a\_ d1lqsl\_ d1n1fa\_  
d1au1a\_ d1wu3i\_ d3bes1\_ d3ux9a\_ d2b71a\_ d3rbaa\_ d2qtra\_ d1nupa\_  
d3l92a\_ d1qjca\_ d2h29a\_ d1vlha\_ d1od6a\_ d1lw7a1 d1mrza2 d4ruka\_  
d2e17a\_ d1liq0a2 d1irxa2 d1r6ta2 d1ivsa4 d2cyba\_ d1rqga2 d1j09a2

d2yxna\_ d1f7ua2 d1h3fa1 d1ffya3 d2g36a1 d1nzja\_ d1jila\_ d1n3la\_  
d1i6la\_ d1pfva2 d1h3na3 d3n9ia\_ d3sz3a1 d3sw2a\_ d1moxc\_ d1dx5i3  
d1edmb\_ d1autl2 d1autl1 d1dva11 d1szba2 d1kigl\_ d2y5fl\_ d1ijqa2  
d1gk5a\_ d1g1sa2 d1nt0a3 d1xdtr\_ d1lmja2 d1lmja1 d1nzia2 d2wphe\_  
d1klil\_ d1pfxl2 d1pfxl1 d1p9ja\_ d1g1ta2 d1f7ea\_ d4yzub\_ d2mgpa1  
d1b9wa1 d2mgpa2 d1ob1c1 d1ob1c2 d1n1ia2 d1n1ia1 d2npra2 d2npra1  
d1m1xb5 d1qx2a\_ d1pvaa\_ d3fs7a\_ d2pvba\_ d1ttxa\_ d1rwy\_ d2kyfa\_  
d1rk9a\_ d1a75a\_ d1exra\_ d1tiza1 d1nyaa\_ d1g8ia\_ d1ggwa\_ d1wdcc\_  
d3fwba\_ d1ggza\_ d2o5ga\_ d1ctaa\_ d1m45a\_ d3i5gc\_ d1sl8a\_ d1fpwa\_  
d2scpa\_ d2roaa\_ d4aqla\_ d3pn7b\_ d1br1b\_ d2mysb\_ d1s6ca\_ d1bjfa\_  
d2obha\_ d1jfka\_ d1jf0a\_ d1qv0a\_ d1lkja\_ d2mlfc\_ d2m97a\_ d2d8na\_  
d4by5a\_ d1jbaa\_ d4nqga\_ d1wdcb\_ d2mysc\_ d1j7qa\_ d1s6ia\_ d1uhka2  
d1r2ua\_ d1dtla\_ d3kf9a\_ d3pn7c\_ d1qjta\_ d1fi6a\_ d1c07a\_ d5d67d\_  
d1tuza\_ d1h8ba\_ d1eg3a1 d1eg3a2 d2zkmx1 d1snla\_ d1gjya\_ d1y1xa\_  
d1hqva\_ d1df0a1 d1qxp2a\_ d4usla\_ d1k94a\_ d1wkya2 d1uuqa\_ d3wh9a\_  
d4mlra\_ d1xyza\_ d4xuya\_ d2je8a5 d4bf7a1 d3cuia\_ d1ur4a\_ d1qw9a2  
d1odza\_ d2vzsa5 d1bqca\_ d2x2ya1 d1hjqa\_ d1qnra\_ d4y7ea1 d1vjza\_  
d4k68a\_ d2v3ga\_ d4hpga\_ d1nofa2 d1nq6a\_ d1h4pa\_ d1aq0a\_ d3ziza\_  
d4bs0a\_ d1ecea\_ d1h1na\_ d1ta3b\_ d1w91a2 d1ilwa\_ d1uhva2 d1us3a2  
d1egza\_ d1tvna1 d3nyda1 d1ghsa\_ d2cyga1 d4xv0a\_ d2c8na2 d1w32a\_  
d3emca\_ d1v6ya1 d1foba\_ d2uwfa1 d2fgla\_ d3niya1 d2c0ha1 d1rh9a1  
d1yq2a5 d1szna2 d1fa2a\_ d1pama4 d5do8a1 d1ea9c3 d1hx0a2 d2fhfa5  
d1qhoa4 d1avaa2 d1m53a2 d4m8ua1 d2gjpa2 d1lwaha2 d4howa1 d1ktba2  
d1j0ha3 d3vm5a1 d2x1ia\_ d1wzaa2 d1uasa2 d2diea1 d1mxga2 d1ht6a2  
d1eswa\_ d1liv8a2 d5cpsa\_ d1ud2a2 d1zjaa1 d3gbea1 d1kwga2 d1wdpa\_  
d1gcya2 d1g5aa2 d1hvxa2 d3dhp2a\_ d2bhua3 d4do4a1 d3qgva1 d1e43a2  
d1g94a2 d2d3na2 d1gjwa2 d1gvia3 d1x1na1 d1r7aa2 d1tz7a1 glapy.1  
d3ljqa\_ g1k2x.1 d4c7ga2 d2gjxa1 d1nowa1 d1jaka1 d1yhta1 d4toqa\_  
d1wb0a1 d1w9pa1 d1itxa1 d1kfw1a\_ d1goia2 d1edqa2 d2gsja\_ d1hjxa1  
d1jnda1 d1vf8a1 d1etob\_ d1umqa\_ d1g2ha\_ d1mixa2 d1e5wa2 d1j19a2  
d1isna2 d2a16b2 d3syxa1 d1mkea1 d2p8va\_ d1xoda1 d1evha\_ d1qc6a\_  
d1legxa\_ d2v76a\_ d1wj1a1 d1qqga2 d1qqga1 d1ntva\_ d1n3ha\_ d4dbba\_  
d3f0wa1 d1p3ra\_ d1wgua1 d2cy4a1 d3hqca\_ d1wvha1 d1xr0b1 d1wgqa1  
d1v89a1 d2coda1 d1zc3b\_ d1wg7a1 d1u5ea1 d1v61a1 d2coca1 d2ys1a1  
d1v5pa1 d1ntya2 d1wjma1 d1wi1a1 d1u29a\_ d1xx0a1 d1unqa\_ d2zkmx3  
d1fhoa\_ d1v88a1 d2adza1 d1x1fa1 d1p6sa\_ d2coaa1 d1btka\_ d1v5ma1  
d1faoa\_ d2x18a\_ d1dyna\_ d1x1ga1 d4kaxb\_ d2j59m1 d1kilb2 d1xcga2  
d1txda2 d1u5da1 d1dbha2 d1wlha\_ d1upqa\_ d1v5ua1 d1foea2 d2fjla1  
d1eaza\_ d2dfka2 d2cofa1 d1kz7a2 d1h6ua1 d1r55a1 d3gboa\_ d1atla\_  
d1buda\_ d4q1la\_ d1quaa\_ d1yp1a\_ d1wnia\_ d1cmxa\_ d1xd3a\_ d3ifwa\_  
d1rypd\_ d1irua\_ d1rypc\_ d3unfk\_ d1rypa\_ d1j2pa\_ d1irui\_ d1j2qh\_  
d3unfh\_ d1m4ya\_ d1rypb\_ d1irul\_ d1irug\_ d1iru2\_ d1q5rh\_ d1rypg\_  
d1g3ka\_ d1q5qa\_ d1e94a\_ d1irub\_ d1ryph\_ d3ty6a\_ d1iruj\_ d1iruk\_  
d1rype\_ d1irud\_ d1irue\_ d3mi01\_ d1rypf\_ d1iruh\_ d2z3ba\_ d1iruc\_



d3mka2\_ dliru1\_ d3u1ra1 dl9ka2 dlkapp2 dlt3ca\_ dlepwa3 d2a97a\_  
d3fiea\_ d3ioqa\_ dlfh0a\_ dlo0ea\_ dlkhqa\_ dlm6da\_ d2cb5a\_ g8pch.1  
dls4va\_ d2pnsa\_ dlvsna1 dlmira\_ dliwda\_ d2oula\_ d7pcka\_ d3bwka\_  
d3bcna\_ d2p86a\_ dlpvja\_ dlpcia\_ dlgece\_ dldeua\_ d4bs6a\_ dlxkga1  
dlcqda\_ dljqpa2 d2c0ya\_ d2bdza\_ d3p5ua\_ dlzoya1 dlqo8a2 dld4ca2  
dljnra2 dlkf6a2 d2jk6a2 d2jk6a1 dlfece1 dlfece2 dl1pfa1 dl1pfa2  
dlxhca1 dlxhca2 dl1dxa2 dl1dxa1 dlgera2 dlm6ia2 dl1onfa1 dl1onfa2  
d3lada2 d3lada1 dlw4xa1 dlw4xa2 dlgesa2 dlmo9a1 dl1xdia1 dl1fl2a2  
dl1fl2a1 dl1fcda1 dl1fcda2 dl1h6va2 dl1h6va1 dlmo9a2 dl1gv4a2 dl1gv4a1  
d2gv8a2 d2gv8a1 d1aoga1 d1aoga2 dl1hyua1 dl1ebda1 dl1ebda2 d3dk9a1  
dl1q1ra2 dl1q1ra1 dl1gesa1 dl1g4ma2 dl1o94a2 dl1lqta1 dl1cjca1 dl1pn0a1  
dl1reo1 dl1ju2a1 d2f5va1 d3c96a1 d2gmha1 dl1pj5a2 dl1gpea1 dl1o5wa1  
dl1n4wa1 dl1k0ia1 d2dw4a2 d2ivda1 dl1seza1 d2voua1 dl1kdga1 dl1s5ja1  
d2hbja2 d2igia\_ dl1wlja\_ dl1qhta1 d4dlea1 dl1tgoa1 d2f96a1 d3tr8a1  
d3mxma\_ dl1q8ia1 dl1y97a1 dl1w0ha\_ dl1kfsa1 d2py5a1 dl1noya\_ dl1d5aa1  
dl1yt3a3 d2guia\_ d3mwpal d4kb1a\_ dl1b9ra\_ dl1offa\_ dl1frra\_ d3wcqa\_  
dl1e9ma\_ dl1l5pa\_ dl1wria\_ dl1i7ha\_ d3av8a\_ dl1czpa\_ dl1rfka\_ d3plma1  
d3b2ga\_ d2bt6a2 dl1tq5a1 d3nvva1 dl1krha3 d2h88b1 dl1n62a2 dl1t3qa2  
dl1kf6b2 dl1zoyb1 dl1jq4a\_ dl1ffva2 dl1dgja2 dl1rm6c2 dl1k8ka2 dl1k8ka1  
d3uleb1 d3i33a2 d3i33a1 dl1bupa1 dl1dkgd2 dl1dkgd1 d4ci6a2 dl1jcfal  
d4a2ba2 d2fxua1 dl1yaga2 dl1yaga1 d4cbua2 dl1bupa2 dl1r7ha\_ dl1faaa\_  
dl1wika1 dl1xfla\_ dl1ttza1 d2f51a1 dl1ti3a\_ dl1nhoa\_ dl1sena\_ d2i4aa\_  
dl1ep7a\_ dl1zmaa1 dl1fo5a\_ d3lefa1 d3diea1 d2yana1 dl1z6na1 dl1oaza\_  
d3zywa1 d4aj8a\_ dl1nm3a1 d4fiwa\_ dl1wmja\_ d4hs1a1 dl1liloa\_ dl1xwaa1  
dl1wjka1 d2vm1a\_ dl1fb6a\_ dl1gh2a\_ dl1h75a\_ dl1nw2a\_ dl1kx5b\_ d3a6na\_  
d4m6ba2 d2nqbd\_ d3wkjd\_ d2yfwe\_ d4h9na\_ d5bnxa\_ dl1kx5c\_ d3r45a\_  
dl1eqzb\_ d4jjnb\_ dl1f66c\_ dl1eqza\_ d4wnnb\_ dl1kx5a\_ dl1u35c1 dl1id3a\_  
d2nqbc\_ dl1kx5d\_ d3us3a3 d3us3a1 dl1tafa\_ dl1bh9b\_ dl1tafb\_ dl1jfib\_  
dl1h3ob\_ d2byka1 dl1n1ja\_ d4g92b\_ dl1bh9a\_ dl1jfia\_ dl1h3oa\_ d2bykb1  
dl1n1jb\_ dl1pd212 dl1nhya2 d2a2ra2 dl1k0dd2 dl1f2ea2 dl1gsua2 dl1f3ba2  
d2fhea2 d2pvqa1 dl1tw9a2 dl1oyja2 dl1e6ba2 dl1k0ma2 d3ik7a1 d4is0a1  
dl1r5aa2 dl1jlva2 dl1m0ua2 d3gtub2 dl1z9ha2 dl1okta2 dl1axda2 d2gsra2  
dl1tu7a2 dl1k3ya2 dl1zgma1 dl1b48a2 dl1gnwa2 dl1gwca2 d2gsta2 dl1glqa2  
dl1oe8a2 dl1pn9a2 dl1v2aa2 dl1fw1a2 dl1duga2 dl1ig8a1 dl1czan2 dl1czan3  
dl1czan1 dl1ig8a2 dl1czan4 dl1bg3a4 dl1bg3a3 dl1bg3a2 dl1novc\_ d2bbvc\_  
dl1qusa\_ dl1sefa\_ dl1sfna\_ dl1rc6a\_ dl1qqya\_ dl1gd6a\_ dl1f6ra\_ dl1ivma\_  
d2gv0a\_ dl1iiza\_ d2z2fa\_ dl1j8xa\_ dl1ghla\_ dl1b9oa\_ dl1741a\_ dl1691a\_  
d2o4wa\_ dl1p37a\_ dl1k28a3 dl1xjta1 dl1jtma\_ d2f2qa\_ d4e97a1 d2k4ua\_  
dl1hp2a\_ d2lu9a\_ dl1baha\_ d2meoa1 dl1wm7a\_ dl1hlya\_ dl1n8ma\_ dl1jlza\_  
dl1wpda\_ dl1c55a\_ dl1pvza\_ dl1wt7a\_ dl1rjia\_ dl1wz5a\_ dl1m2sa\_ dl1pjva\_  
dl1c49a\_ dl1qkya\_ d2ktca1 dl1wmta\_ dl1du9a\_ dl1j5ja\_ dl1r1ga\_ dl1mpya2  
dl1kw3b2 dl1kw3b1 d4ghga1 dl1tfza1 d3isqa1 d3isqa2 dl1sqia1 dl1sqia2  
dl1lkda2 dl1lkda1 dl1mpya1 dl1cjxa2 dl1cjxa1 dl1sp9b2 dl1t47a1 dl1t47a2  
dl1sp8a1 dl1sp8a2 dl1flua1 d2h0va\_ dl1s5ja2 dl1qhta2 d4dlea2 dl1tgoa2

d3py8a2 d1q8ia2 d1kfsa2 d2py5a2 d1d5aa2 d1qsta\_ d2beia1 d4m3sa\_  
d1u6ma1 d1ygha\_ d1yk3a1 d3dr6a\_ d1xmta\_ d1z4ea1 d2ge3a1 d2fiaa1  
d2jdca1 d1y9wa1 d3to7a\_ d1wwza1 d2fl4a1 d2ozua1 d2b5ga\_ d2cy2a1  
d2p0wa\_ d1cm0a\_ d4pswa\_ d1yrea1 d1yr0a1 d1m4ia\_ d2gana1 d1yvka1  
d1ghea\_ d2g3aa1 d1y7ra1 d2euia1 d1q2ya\_ d2fsra1 d1xeba\_ d2ae6a1  
d1cjwa\_ d1qsma\_ d2aj6a1 d1y9ka1 d1i12a\_ d1vkca\_ d2atra1 d1n71a\_  
d2d4pa1 d2fiwa1 d2fe7a1 d1tiqa1 d2ou2a\_ d1yx0a1 d2fcka1 d1p0ha\_  
d2j8ma\_ d2pq8a\_ d1z4ra1 d1s3za1 d1ufha\_ d1prtc1 d2wv6d\_ d1prtf\_  
d1l1trd\_ d4l63b1 d1r4pb\_ d1prtd\_ d1t10f\_ d2bosa\_ d1prtb1 d3chbd\_  
d1xvqa1 d1pn0a2 d3hy2a\_ d2cvba1 d1o8xa\_ d1lu4a\_ d1we0a1 d2bmxal  
d2a4va1 d1psqa\_ d1xiya1 d1q98a\_ d1n8ja\_ d1zofa1 d2ggta\_ d3tjja\_  
d4jela1 d1o73a\_ d3s9fa\_ d2zcta\_ d1qmva\_ d2b1ka\_ d5dvba1 d2b5xa1  
d2v2ga\_ d1st9a\_ d3tb2a\_ d4llra\_ d4fh8a1 d1e2ya\_ d1knga\_ d2h30a\_  
d1i5ga\_ d2z9sa\_ d2f8aa1 d1tp9a1 d2b7ka\_ d1nm3a2 d3hvva\_ d2wfc1  
d4kcea\_ d1xvwa1 d4gqca1 d3qpma\_ d4k1fa\_ d1zzoa1 d1gpla\_ d1prxa\_  
d4od7a1 d1z6ma1 d4mcua1 d4dvca1 d1r4wa\_ d3l9sa\_ d1un2a\_ d3rppa\_  
d2m5ta\_ d1cqqa\_ d1wqsa\_ d5bpea\_ d2ipha\_ d1lvoa\_ d2bhga1 d3tnta\_  
d3sjia\_ d3d23a1 d2fyqa\_ d3tloa\_ d3zvea1 d2hrva\_ d3q3ya1 d4asha1  
d1cg2a1 d1yloa2 d1y7ea2 d1y0ya3 d1lfwa1 d1vixa1 d1fnoa4 d1vhoa2  
d1ysja1 d1vhea2 d1z2la1 d2fvga2 d1r3na1 d2grea2 d1xmba1 g1q71.1  
d1rtqa\_ d1w52x1 d2ppla1 d1hpla2 d1lpbb2 d2oxea1 d1bu8a2 d1rp1a2  
d1ys1x\_ d4hs9a\_ d1ispa\_ d1ex9a\_ d1ku0a\_ d3qmma\_ d1n9wa1 d1e1oa1  
d1c0aa1 d1b8aa1 d1l0wa1 d3a74a1 d1eova1 d1lgya\_ d4l3wa\_ d1gz7a\_  
d1lukca\_ d1bvsa3 d2ftba\_ d1mpa\_ d2rcqa1 d1fdqa\_ d4lkpa\_ d1sa8a\_  
d1vyfa\_ d1lpja\_ d3vg7a1 d4azqa1 d1o8va\_ d5bvqa\_ d1p6pa\_ d2qo4a\_  
d1opba\_ d1yival d1o1va\_ d4bvma1 d4tkba\_ d4i3ba\_ d1bwya\_ d1ftpa\_  
d4gkca\_ d1cbia\_ d3p6da1 d1kqwa\_ d2a0aa1 d3zxha\_ d1cgl1a\_ d1rm8a\_  
d1eaka2 d1hy7a\_ d2jsda\_ d1cxva\_ d1hv5a\_ d1i76a\_ d1eb6a\_ d1m4la\_  
d2bk7a\_ d3fjua\_ d1z5ra1 d1kwma1 d1uwya2 d1jgga1 d2c1ca1 d1dtda\_  
d1jgta2 d1ofda3 d1ecfa2 d1q15a2 d1ct9a2 d1ao0a2 d1te5a\_ d1c8nc\_  
d1x36a\_ d1smvc\_ d1ng0c\_ d4sbvc\_ d1lopa\_ d1f2nc\_ d1cixa\_ d1y29a\_  
d1v7fa\_ d2jtba\_ d1d1ha\_ d1g9pa\_ d1lupa\_ d1qk7a\_ d1mb6a\_ d2a2va\_  
d1niya\_ d1i25a\_ d1hvwa\_ d2mpqa\_ d1ie6a\_ d1kqha\_ d1la4a\_ d2mxoa1  
d1d10a\_ d1koza\_ d1qk6a\_ d1emxa\_ d1lqra\_ d1c6wa\_ d1rmka\_ d1ixta\_  
d1eyoa\_ d1cnna\_ d1fu3a\_ d1f3ka\_ d1fyga\_ d4lu0a\_ d1of8a\_ d3unda1  
d3e9aa1 d1vr6a2 d1n8fa\_ d2qkfa\_ d1d9ea\_ d1o60a\_ d1ny721 d1ny722  
d1a6ca2 d1a6ca1 d1pg122 d1pg121 d1pg111 d1ny711 d1mqta\_ d1d4m3\_  
d1fmd3\_ d2mev1\_ g1aym.1 d1ev13\_ d4q4w1\_ d1r1a3\_ d2x5ia\_ g1r1a.1  
g1d4m.1 g1rhi.1 d1b35b\_ d1lopa\_ d1tme1\_ d4iv1a\_ g1pvc.1 g1fnp.1  
d1fnp1\_ d4gb31\_ d1d4m1\_ d1fmd1\_ d1ev11\_ d2wzr3\_ g1cov.1 d1qqp3\_  
g1fmd.1 d2x5ic\_ d1rhi3\_ g1oop.1 d1hxs1\_ g1hxs.1 d1fnp3\_ d1bev1\_  
g2mev.1 d1eah3\_ d1aym1\_ d1pvc3\_ d1qqp1\_ d1zba3\_ d1h8ta\_ d3vbhc\_  
g1b35.1 g1bev.1 d1hxs3\_ g1ev1.1 d1bev3\_ g1tmf.1 d1tmf1\_ d1b35a\_  
d2mev3\_ g1eah.1 g1h8t.1 d1eah1\_ d4q4w3\_ d1r1a1\_ d1aym3\_ d1pvc1\_

d1zba1\_ dlh8tc\_ dloopc\_ dltme3\_ glqqp.1 d4iv1c\_ g1tme.1 d3ubub\_  
d1legia\_ dlv7pa\_ d1tdqb\_ d3ubua\_ d1c3ab\_ dlh8ua\_ d3bx4b\_ d1t8ca1  
d1sb2a1 d1qdda\_ d2ziba1 d3cada\_ d1byfa\_ d1j34b\_ d1jwia\_ d1jzna\_  
d1c3aa\_ d1oz7b\_ d1wmza\_ d3bdwb\_ d1hq8a\_ d1fifa1 d1dv8a\_ d3hupa\_  
d1wk1a1 d1umra\_ d2afpa\_ d3bx4a\_ d1gz2a\_ d1sl6a\_ d1v7pb\_ d3g8ka\_  
d1ixxa\_ d1j34a\_ d1jwib\_ d1g1sa1 d1y17a1 d1ja3a\_ d1fvub\_ d3bdwa\_  
d1sb2b1 d1fvua\_ d1umrc\_ d1oz7a\_ d4m17a\_ d3cfwa1 d1ypqa1 d1g1ta1  
d3fd4a\_ d3l9jc\_ d4dn8a1 d1v41b\_ d1rd11\_ d2msba\_ d4w9ta\_ d1jvna1  
d4x2ra1 d1ka9f\_ d1qo2a\_ d4axka1 d1thfd\_ d4u28a\_ d2y88a\_ d4wd0a\_  
d1vzwa1 d2flia1 d1h1ya\_ d1tqja\_ d1tqxa\_ d1ux8a\_ d1dlya\_ d4i0va\_  
d2bkma\_ d1dlwa\_ d2bmma\_ d2r80b\_ d1cqxa1 d1cg5a\_ d1gcvb\_ d3boma\_  
d2h8fb\_ d2raoa\_ d3bj1a\_ d4hrrb\_ d2r50a\_ d3d1kb\_ d2aalb1 d3zhwa\_  
d3hf4b\_ d3gdja\_ d1jebb\_ d3bj1b\_ d1x9fb\_ d1wmub\_ d1gcva\_ d3bcqb\_  
d3d4xb\_ d1gvha1 d2dc3a\_ d3hf4a\_ d4yu3a\_ d3k8ba\_ d1qpwb\_ d2r80a\_  
d3bcqa\_ d1v4wa\_ d3wtgb\_ d1j17a\_ d4esaa\_ d1a9we\_ d3d1ab\_ d1fsla\_  
d4h2la\_ d1v4wb\_ d1mwca\_ d1vhba\_ d1jeba\_ d1spgb\_ d1h97a\_ d1q1fa\_  
d1tu9a1 d3d1aa\_ d1hdsb\_ d3hyub\_ d2zfb\_ d3fs4a\_ d1oj6a\_ d1shrb\_  
d4h2lb\_ d4yu3b\_ d1spga\_ d3hrwa\_ d3qqra\_ d3at5a\_ d4wchd\_ d3hyua\_  
d1cg5b\_ d1uc3a\_ d1hbra\_ d2raob\_ d1outb\_ d4esab\_ d3gdjb\_ d3qqqa\_  
d1x9fc\_ d3vrfa\_ d1litha\_ d3mkba\_ d3d4xa\_ d3mjpa\_ d1j16a\_ d3fh9a\_  
d1outa\_ d2dc3b\_ d1lit2a\_ d3eoka\_ d3g46a\_ d1qpwa\_ d3vrfb\_ d1ch4a\_  
d1x9fd\_ d1hdsa\_ d2zfa\_ d3mkbb\_ d1or4a\_ d3wtga\_ d1a4fa\_ d3fh9b\_  
d3bomb\_ d3cy5a\_ d3at5b\_ d1x9fa\_ d2oifa\_ d4lmb\_ d1cpcb\_ d3v57a\_  
d1kn1a\_ d1cpca\_ d4f0ta\_ d2vjha\_ d4po5b\_ d1eyxa\_ d1alla\_ d4f0tb\_  
d1b33b\_ d1b8db\_ d4h0mb\_ d1b33a\_ d2vjhb\_ d4lm6b\_ d2vmlb\_ d1allb\_  
d2vjta\_ d3dbja\_ d2vmla\_ d2vjtb\_ d4f0ub\_ d1f99b\_ d4rmpa1 d1liaa\_  
d1eyxb\_ d2uulb\_ d4lmsb\_ d4f0ua\_ d2bv8a\_ d1f99a\_ d2bv8b\_ d2c71b\_  
d3dbjb\_ d4rmpb1 d4h0ma\_ d3v57b\_ d1kn1b\_ d1liab\_ d2uula\_ d2j96a\_  
g1gxs.1 d1k8qa\_ d2xqfa\_ d1ea5a\_ d1f6wa\_ d1dx4a\_ d1qe3a\_ d1k4ya\_  
d4qwwa\_ d2ha2a\_ d3c8da2 d2pbla1 d1jkma\_ d1jjia\_ d1jjfa\_ d1g19b1  
d1gkub1 d1jmx1 d1pbya1 d1pbya2 d1jmx4 d1jmx3 d1pbya4 d4iuaa3  
d4bvva\_ d5hpga\_ d3k65a\_ d1ki0a3 d1ki0a2 d1ki0a1 d1a0ha1 d1pmla\_  
d3sp8a3 d2feba1 d1dosa\_ d3qm3a1 d2fjka\_ d1f74a\_ d3l21a\_ d2e1da\_  
d1to3a1 d1w3ia\_ d1sfla\_ d1n7ka\_ d1vcva1 d4imea\_ d1wa3a\_ d2ocza1  
d1f2ja\_ d3m16a\_ d2yxga\_ d1ub3a\_ d3a5fa\_ d1fbaa\_ d1l6wa\_ d1xfba1  
d1wx0a1 d1vpxa1 d1ojxa\_ d2a4aa1 d1xkya1 d3cq0a1 d3s1xa\_ d1f05a\_  
d1fdja\_ d3cpa1 d4d2ja\_ d1e88a1 d1l6ja5 d1l6ja4 d1lea4 d1l6ja3  
d1h8pa2 d1h8pa1 d3rp2a\_ glucy.1 d1fuja\_ d2zchp\_ d3w94a\_ d1si5h\_  
d1lo6a\_ g2pka.1 d1cgha\_ d1kigh\_ d1a5ia\_ d3s9ba\_ d1hj8a\_ d1ao5a\_  
d2anya\_ d1q3xa1 d1gvza\_ d1azza\_ d4gsoa\_ d2f91a1 d1iaua\_ d1gdna\_  
d1eufa\_ g1fiw.1 d1eq9a\_ d4nfea\_ d2rdla\_ d1spja\_ d1elva1 d1a7sa\_  
d1ekbb\_ d1pfxc\_ d1yc0a\_ d2aiqa\_ g1fiz.1 d4k60a\_ d4dgja\_ d1mzaa\_  
d1op0a\_ d3tjva\_ d1pytd\_ d1sgfg\_ g1gg6.1 d2eeka\_ g1rtf.1 d1a0ja\_  
d3g01a\_ d1pytc\_ d4e7na\_ d1ddja\_ d1z8ga1 d2hlca\_ d1npma\_ d1brup\_

g1jou.1 d1sgfa\_ d1autc\_ g2hnt.1 g1kdq.1 dlorfa\_ d3s69a\_ d4crga\_  
d1fxya\_ d1bqya\_ d1ra6a\_ d1muka\_ d3gsza\_ d1khva\_ d1te9a\_ d2xwha\_  
d3uqsa\_ d3hkwa\_ d3n6ma\_ d2cjqa\_ d2xyma\_ d1teba\_ d1te8a\_ d1s48a\_  
d1u09a1 d4wfxa\_ d3tyqa\_ d2pgga1 d1dzka\_ d4tlja\_ d2a2ua\_ d4wfva\_  
d3t1da\_ d4iaxa\_ d3zq3a\_ d2nnda\_ d1i4ua\_ d1kxoa\_ d1bbpa\_ d1kt7a\_  
d1lexsa\_ d3s26a1 d1lf7a\_ d1qfta\_ d4gh7a\_ d1z24a1 d1qabe\_ d1xkia\_  
d1ew3a\_ d3bx7a\_ d4iawa1 d1n0sa\_ d1gkab\_ d3kzaa\_ d2k23a\_ d2l9ca1  
d2joza1 d1gm6a\_ d3kffa\_ d3saoa1 d1e5pa\_ d1yupa1 d1liua\_ d3lgia\_  
d3i77a\_ d2z9ia2 d4nsva\_ d1lcya2 d4jcna\_ d1agja\_ d1os8a\_ d1hpga\_  
d1p3ca\_ d1l1ja\_ d1qtfa\_ d1iwea\_ d1qf5a\_ d1vmaa2 d1nija1 d1np6a\_  
d2p67a1 d3ihla\_ d1okkd2 d1ls1a2 d1s1ma2 d1liona\_ d2v40a\_ d3hida\_  
d2vola1 d2g0ta1 d1vcoa2 d1j8mf2 d1g3qa\_ d1xjca\_ d1p9ba\_ d1qzxa3  
d1lihua2 d1lihua1 d2qm8a\_ d1dj2a\_ d4ioja\_ d1cp2a\_ d1yrba2 d1hyqa\_  
d3gqba2 d1skye3 d1xp8a1 d1tf7a2 d1tf7a1 d1ye8a1 d1skyb3 d2qe7d2  
d4blta\_ d4huta\_ d3l1daa2 d4hyya\_ d2i3ba1 d1cr1a\_ d3j9tb2 d3ntua2  
d1vdza1 d2z43a\_ d1e9ra\_ d3ziaa2 d1n0wa\_ d1g6oa\_ d3ziad2 d3j9ta2  
d1pzna2 d3gqbb2 d2i49a\_ d1nnfa\_ d1xvxa\_ d1ursa\_ d1h3da1 d1iuda\_  
d4m1va1 d1twya\_ d3e13x\_ d2nxoa1 d4pfua\_ d3ttma\_ d1elja\_ d2qmw1  
d1us5a\_ d1y3na1 d1jeta\_ d1uqwa\_ d4f19a1 d2esna2 d3thia\_ d3fasa1  
d2uyeb\_ d2xwva1 d1r9la\_ d2fyia1 d1pb7a\_ d2ozza1 d1sw5a\_ d1nh8a1  
d1vr5a1 d2g29a\_ d1xs5a\_ d3lswa\_ d2z23a\_ d3w9va\_ d3tcha\_ d1q35a\_  
d1z7me1 d3q27a\_ d1p99a\_ d1ve4a1 d2i6ea1 d4mcoa1 d4n8ya\_ d1eu8a\_  
d1zba1 d1hsla\_ d1ixca2 d1j1na\_ d1xvya\_ d1y9ua\_ d2z22a1 d1xoca1  
d4oera\_ d1wdna\_ d5f1qa1 d1xt8a1 d1i6aa\_ d4gwoa\_ d4igta1 d1pc3a\_  
d4mmpa1 d1o63a\_ d2czla1 d2onsa2 d4mija1 d4ok5a1 d2bmfa1 d2bmfa2  
d1yksa1 d1yksa2 d1jr6a\_ d2qeqa1 d2jlqa1 d1a1va2 d1eh3a\_ d3skpa\_  
d1dtza1 d1dtza2 d1ieja\_ d1jnfa2 d1ce2a1 d1jnfa1 d1b1xa1 d1jw1a1  
d1jw1a2 d1ryoa\_ d1h76a1 d1h76a2 d1c4oa1 d2p6ra3 d2p6ra4 d1oywa2  
d1oywa3 d1wrba1 d1w36b2 d1w36b1 d1c4oa2 d3bora\_ d1t6na\_ d2eyqa5  
d2eyqa3 d2eyqa2 d2zu6a2 d1veca\_ d1uaaa1 d1w36d1 d2g9na1 d1z3ix2  
d2rb4a\_ d1hv8a1 d1hv8a2 d1t5ia\_ d1w36c2 d2j0sa2 d2j0sa1 d1fuka\_  
d3hjha1 d1z5za1 d1qdea\_ d1z63a1 d1s2ma2 d1s2ma1 d1wp9a1 d1wp9a2  
d1gm5a3 d1gm5a4 d3dina4 d3dina3 d1q0ua\_ d1w36c1 d1z3ix1 d1nkta3  
d1nkta4 d1uaaa2 d1w36d2 g1qhh.1 d2fwra2 d2fwra1 d3q3ma\_ d1za0a1  
d1mxra\_ d2inca\_ d1jk0a\_ d2incb\_ d1mhyb\_ d3hf1b\_ d1mtyb\_ d1r2fa\_  
d2uw1a\_ d1mhyd\_ d3n37a\_ d1afra\_ d1syya\_ d1mtyd\_ d2olza\_ d1uzra\_  
d1smsa\_ d2fkza\_ d1zuja1 d1s3qa1 d2fjca1 d1z6om1 d1veia\_ d4dyya\_  
d1jiga\_ d3gvya\_ d2pyba\_ d4cy9a1 d3bvfa1 d1r03a\_ d2cf7a\_ d1nf4a\_  
d1zs3a1 d4iwka\_ d3ka8a\_ d3np0x\_ d1n1qa\_ d1lb3a\_ d4e6ka\_ d1z6oa1  
d2fzfa1 d4dyua\_ d3ge4a\_ d1jgca\_ d4am4a\_ d2z6ma\_ d1ji5a\_ d1vlga\_  
d1krqa\_ d3qz3a\_ d1o9ra\_ d2ffxj\_ d1euma\_ d1yv1a1 d2v2pa\_ d1j30a\_  
d4di0a\_ d1dpsa\_ d2cbia2 d2choa2 d1l8na1 d1oewa\_ d2qzxa\_ d2asia\_  
d1psoe\_ d1miqa\_ d1smra\_ d2h6ta\_ d1pfza\_ d1izda\_ d3hd8a\_ d1j71a\_  
d1dpja\_ d4aa9a\_ d1t6ex\_ g1b5f.1 g1lya.1 g1htr.1 d1qdma2 d1bxoa\_

d1wkra\_ d1tzsa\_ d1libqa\_ d2qzwa\_ d1bdqa\_ d3ggta\_ d3ixoa\_ d1mrxa\_  
d2haha\_ d1tw7a\_ d4njsa\_ d1sgua\_ d2p3da\_ d1nsoa\_ d3d3ta\_ d2rkfa\_  
d1c6ya\_ d2rspa\_ d3ogpa\_ d3ekwa\_ d2o4na\_ d2j9ja\_ d3ggua\_ d3lzua\_  
d4npua\_ d4j55a\_ d2r8na\_ d2fxda\_ d2p3ca\_ d4dqa\_ d3ttpa\_ d3t3ca\_  
d2p3aa\_ d2hc0a\_ d2fdda\_ d3mwsa\_ d1wgra1 d1ef5a\_ d1wfy1 d1e8ya3  
d1wgya1 d1lfda\_ d2cs4a1 d1wxma1 d2byea1 d3kh0a1 d2byfa1 d1wxaa1  
d1e7ua3 d1h4ra3 d4y18a1 d2a16a3 d1wgda1 d1wgg1 d4q5eb\_ d1wjna1  
d1se9a\_ d3n3kb\_ d1wz0a1 d1we6a1 d2m0xa\_ d2gbka\_ d3rt3b1 d1wh3a1  
d1sifa\_ d2ekek2 d4ii2b1 d4hk2a1 d1c3ta\_ d1m94a\_ d1wgha1 d1ttna1  
d1j8ca\_ d1wx8a1 d3v6cb1 d2ma9b\_ d4i61b1 d2jvca1 d1iyfa\_ d2k1fa\_  
d1wxva1 d1wf9a1 d1t0ya\_ d2io0b2 d1x1ma1 d2gbma\_ d1zw7a1 d2m17a\_  
d1ud7a\_ d1we7a1 d2lwp1 d2gbja\_ d1wjua1 d1v6ea1 d1v86a1 d4eewa\_  
d1wiaa1 d4icva\_ d4gu2a\_ d1wx7a1 d1wy8a1 d4hjka1 d2faza1 d1v5oa1  
d1g66a\_ d5ajha1 d1j1ia\_ d2rhwa\_ d1dszb\_ d1a6ya\_ d3cbba\_ d1ynwa1  
d1r4ia\_ d1hcqa\_ d2hana\_ d2hanb\_ d2enva1 d1kb4b\_ d2n11b\_ d1lo1a\_  
d1cita\_ d1um8a\_ d1ixza\_ d1qvra2 d1qvra3 d1qzma\_ d1sxjc2 d1jr3d2  
d2p65a\_ d1l8qa2 d3hu3a3 d1sxjd2 d1njfa\_ d1in4a2 d1sxja2 d1tuea1  
d2ce7a2 d1w5sa2 d1sxjb2 d1d2na\_ d1ny5a2 d1ofha\_ d2gnoa2 d2a5yb3  
d1fnna2 d1u0ja1 d1lv7a\_ d1iqpa2 d2fnaa2 d1ixsb2 d4gita\_ d1sxje2  
d1g41a\_ d1svpa\_ d1mbma\_ d3su6a1 d1cula1 d4agka\_ d1vcpa\_ d1q31a\_  
g1n11.1 d3e90b\_ d1ep5a\_ d3u1jb\_ d2e3fa\_ d2e3ea\_ d2l1da\_ d2ny8x\_  
d2e3ga\_ d2ny9x\_ d2nz3a\_ d2l1j7a\_ d1n4na\_ d2m8bb1 d2kyqa\_ d3psma\_  
d1jxca\_ d2g11a\_ d1ugla\_ d4uj0a\_ d1js9c\_ d1za7a\_ d1laja\_ d1t0za\_  
d2i61a\_ d1t1ta\_ d1sn4a\_ d1kv0a\_ d2l1kba\_ d1npia\_ d1wwna\_ d1pe4a\_  
d2kbka\_ d2li7a\_ d1djta\_ d2kbha\_ d1dq7a\_ d1sega\_ d1omya\_ d1zywa1  
d1jzaa\_ d1bnla\_ d1t61c1 d1iyjb4 d1iyjb5 d1iyjb3 d1o7ia\_ d4ipca1  
d1x3ea\_ d4apva\_ d1jb7a1 d1jb7a2 d1jb7a3 d3kdfa\_ d1ue1b\_ d1wjja1  
d3eiva\_ d1xjva2 d1xjva1 d2ccza2 d1se8a\_ d1l1oc\_ d1jb7b\_ d1qvca\_  
d1qzga\_ d1miua4 d1miua5 d1miua3 d3g48a1 d1gd7a\_ d1mkha\_ d1pyba\_  
d1y14b1 d2nn6i1 d1i94l\_ d2zjra2 d1smxa\_ d2qamc2 d1hh2p1 d2r7da1  
d1r12a2 d1wfqa1 d3bzka4 d1x6oa2 d3a0ja\_ d2j01d2 d2ja9a1 d4q15a\_  
d1hr0w\_ d1luza\_ d2n3sa\_ d2vnud1 d1h95a\_ d1go3e1 d2nn6h1 d1ne3a\_  
d2mo1a\_ d1liz6a2 d1jjga\_ d1e3pa2 d2ix0a3 d2ix0a2 d2lxja\_ d1ueba3  
d1ueba2 d2z0sa1 d1u0la1 d2ix0a1 d2eifa2 d2je6i1 d3i2za1 d2c35b1  
d2ahob2 d1t9ha1 d3i4oa\_ d2qall1 d1jt8a\_ d2nn6g1 d1g6pa\_ d3cama\_  
d1i94q\_ d1d7qa\_ d2ba0a1 d2vnud2 d2vnud3 d1khia2 d2qalq1 d1wi5a1  
d1xta2 d1ny4a\_ d1dgsa2 d1fvia1 d1ckma1 d1p16a1 d1x9na2 d1pfsa\_  
d2a1ka\_ d1rpma\_ d2shpa1 d1yfoa\_ d1l8ka\_ d2ooqa1 d1g4us2 d1p15a\_  
d1lara2 d1lara1 d1wcha\_ d2fh7a2 d2fh7a1 d1ohea2 d2f4da\_ d1rxda\_  
d2hxpa\_ d1xria\_ d1d5ra2 d1fpza\_ d3ezza\_ d4y2ea\_ d1i9sa\_ d3azya\_  
d3wvja\_ d1upsa1 d2hyka\_ d1ajka\_ d2vy0a\_ d1o4ya\_ d3o5sa\_ d3d6ea\_  
d3atga\_ d1dypa\_ d1umza\_ d3i4ia\_ d1c11a\_ d4lbqa\_ d1a78a\_ d1slta\_  
d4no4a\_ d3zsja\_ d3duia\_ d1g86a\_ d1is3a\_ d1qmja\_ d1tdha3 d1q3ba3  
d1ee8a3 d1k82a3 g1qmo.1 g1len.1 d3zyra\_ d1n47a\_ g21tn.1 d1avba\_

d3usua\_ d1dhkb\_ d1f9ka\_ d1lukga\_ d1g8wa\_ d1g9fa\_ d1wbfa\_ d3wcsa\_  
d1g7ya\_ g1loe.1 d1mvqa\_ d1hq1a\_ d1v6ia\_ d1dbna\_ d1qnwa\_ d1fx5a\_  
d4l8qa\_ d1ioaa\_ d3n35a\_ d2h0ba\_ d2erfa\_ d1h30a2 d3mw4a1 d1pz7a\_  
d2r1ba\_ d3v64a1 d1d2sa\_ d3bopa1 d3mw3a1 d1okqa1 d1okqa2 d1wioa4  
d1ccza2 d1dr9a2 d1ic1a1 d2d9qb1 d2nxyb2 d1adqa1 d1fnga1 d1uvqb1  
d1zs8a1 d2vola1 d2vola2 d1mfbl2 d2jelh2 d1uwel2 d3qq4b1 d1kjob\_  
d1k5na1 d1osph2 d4odhl2 d1ow0a1 d1ow0a2 d1bfob2 d3l9ra2 d3jtth1  
d2fath2 d4elkb2 d1fn4b2 d2xfxb\_ d1pg7x2 d1cqka\_ d4k71b2 d1lk2a1  
d1eapb2 d4lfhg2 d1i4fa1 d2nw2a2 d1kfah2 d1mhca1 d1h3ua1 d1wejh2  
d1h0db2 d1a5fh2 d1kcvh2 d1mjuh2 d1qqda1 d1kcrh2 d1k8ia1 d3huja2  
d2nnab1 d1nfd2 d3mffb2 d1s9va1 d1lk3h2 d1q0x12 d1fv1b1 d1neza1  
d4rfeb2 d1r3ha1 d1a6tb2 d1kjva1 d1pz5b2 d1onqa1 d2bc4a2 d1de4a1  
d1k8da1 d1tcra2 d1dn0b2 d1nfde2 d2xwtb2 d1bfoa2 d1mexh2 d1iakb1  
d1ypzf2 d4f7ea2 d1q7212 d2fbjh2 d1fe8h2 d1clzh2 d1fngb1 d1uvqa1  
d1vgka1 d1c16a1 d4j12a2 d4x99b2 d1igtb3 d1je6a1 d1q72h2 d1nldh2  
d1teth2 d2hmic2 d1i1ca2 d1i1ca1 d1k8ib1 d1q0yh2 d1kfa12 d3frua1  
d1pg7w2 d1u58a1 d1igyb4 d1igyb3 d1hyrc1 d1klub1 d1deeb2 d1c12b2  
d2bc4b2 d2ig2h2 d1kcv12 d3wn5b1 d1lk2b\_ d1lk312 d1mjul2 d1sm3h2  
d1q0xh2 d1zvsal d1ydpal d1u8ib2 d1ypze2 d1kcuh2 d1op9a\_ d1y01a1  
d1letzb1 d1egj11 d2gsib1 d1nj9a1 d4jfh1 d1aqk11 d1t2ja\_ d1lo4h1  
d1zvyal d3v4v11 d4enec1 d1kxtb\_ d5e8ea1 d2pxya\_ d4weud\_ d1xiwc\_  
d2esvd1 d1qznh\_ d1ogae1 d1f4xh1 d4n1hb\_ d3ezjb1 d3mlw11 d1kfah1  
d1letza1 d1b4jh1 d3cfic\_ d4w68a\_ d2arja1 d1ek3a\_ d2ok011 d1vera\_  
d1uwgh1 d1blnb1 d1fpth1 d1rzga1 d2giya1 d4m3kb1 d1nc2a1 d2nyyd1  
d1ncna\_ d1fbih1 d5dxwa\_ d4fqqa1 d1dqdh1 d1jfq11 d1kelh1 d1faih1  
d1frgl1 d1fig11 d4m6n11 d1fo0a\_ d4hxb11 d3b5ga\_ d3quyd1 d2h9gb1  
d1i8kb\_ d2dd8h1 d2ck0h1 d1eaja\_ d4w6wb1 d2a6ib3 d1t66d1 d2e27h\_  
d1ob1b1 d1f11b1 d2v7na1 d1ad0a1 d2xt1b1 d1pskh1 d4i13b1 d2op411  
d1a0q11 d1uwel1 d1za3a1 d1ncb11 d4uu9a\_ d1bm3h1 d1cloh1 d1nqba2  
d1cf8h1 d4y5va\_ d1mhph1 d5anma1 d4cdgc1 d4ldeb\_ d1y01b1 d2pcpb1  
d1z3gl1 d1dfb11 d1fh5h1 d3g5xa1 d1tzib1 d4dn311 d3zhka1 d2b1hh1  
d2uy1a1 d1f3dh1 d1nj9b1 d2agjh1 d2h1p11 d1q72h1 d8fabb1 d1ndmb1  
d1rjca1 d4u6hb1 d3upca\_ d2fbj11 d1osph1 d1tvda\_ d2cjh\_ d4fhbd1  
d1bd2d1 d1rz7h1 d3nn8a\_ d1knoa1 d1nfdal d2bmkb1 d1dq11\_ d1igyb1  
d1igfl1 d12e8h1 d3utza1 d1nc2b1 d1rihh1 d4mwfb1 d4jvpa1 d1mieh1  
d1rhfa1 d1fgn11 d1sbsh1 d1lp9e1 d1dn0a1 d4lqf11 d1iaih1 d1kgcd1  
d1mh5b1 d1gpol1 d2g60h3 d1f8t11 d2jixd1 d4grwh\_ d1fo0b\_ d1bfob1  
d1axsa1 d1u9ka\_ d1nmbh\_ d1h8na1 d1h8na2 d1jguh1 d4eura1 d3sdy11  
d35c8h1 d1w7211 d1mvub\_ d1i9rh1 d1ob1a1 d4wenb\_ d1yeeh1 d3ietc1  
d1f58h1 d1ad0b1 d1mqkl\_ d1nbvh1 d4b50a\_ d3r8bb\_ d1baf11 d1mamh1  
d4rgne1 d2gsgb\_ d35c811 d1bafh1 d1ailh1 d2pcpa1 d2fath1 d2x1pa\_  
d1orsb1 d1libg11 d1shma\_ d1a2yb\_ d1u0qa\_ d2coqa\_ d1hilb1 d1qfwi\_  
d1jv5b\_ d1fn4b1 d5e0qa\_ d1nsnh1 d1plgl1 d4ocx11 d1kb5h1 d1rzfh1  
d1pg7x1 d2fx7h1 d2oi9c\_ d1l7i11 d3eyva1 d1d5i11 d4ffyl\_ d1tet11

d1a6wh\_ d1ac6a\_ d3dvfa\_ d1nfde1 d1mimh1 d1ri8a1 d1jhlh\_ d3dura\_  
d1fskb1 d1f97a1 d3so3b1 d2ak4d1 d1lp9f1 d4z7wf1 d1l7th1 d4y5ya\_  
d4x7ec1 d1emth1 d1ikfl1 d1nlbh1 d4uta11 d1bjma1 d1eapb1 d1u6ah1  
d2dtgd1 d1kj2b\_ d1xeda1 d1c1eh1 d1fgvh\_ d2bnub1 d2fb4h1 d2dtgb1  
d1ktrh\_ d1jpth1 d1qkz11 d4hepg\_ d2atpb1 d1flrh1 d2hrpl1 d1mvfa\_  
d1iaim1 d3k80a1 d2jb5h1 d3zkxc\_ d4grwe\_ d1it9h1 d1rhhb1 d3w9ec\_  
d1e4wh1 d1sy6h1 d2j6eh1 d3qxta\_ d1jglh1 d1p7ka1 d1tzhb1 d4n8pa1  
d1gaf11 d2jelh1 d1wioa2 d4i0cc1 d1cicb1 d1lmka2 d1lmka1 d1iqwh1  
d1lorqb1 d1ejoh1 d1jnlh1 d4zg1a\_ d43c9b\_ d1ggbl1 d1wejh1 d3q6fa1  
d1f3dj1 d3c61a1 d1bqlh1 d3p9wb\_ d1a3r11 d1h0db1 d2uzil\_ d1eo811  
d1qfwl\_ d1n7m11 d1igja1 d1c5ch1 d2a9mh\_ d1rmfh1 d1fj1b1 d4heme\_  
d1ccza1 d1a5fh1 d1ogad1 d1dlfh\_ d1qa9b\_ d1vgel1 d3qskb\_ d1sjxa\_  
d4ozfg1 d1sq2n\_ d1qd0a\_ d1kcvh1 d1c5db1 d3qcul1 d8faba1 d3bn9d1  
d1mjuh1 d4y8dc\_ d7fabh1 d3dvgb1 d1l0011 d1a6tb1 d1gigh1 d1kcrh1  
d2hwz11 d1yjdc1 d3clfl1 d4krna\_ d1d171\_ d1e6o11 d1mexh1 d3r0ma\_  
d4kkna\_ d1fnsl1 d1oaqh\_ d1rzia1 d1lucbh1 d1ncw11 d4b41a\_ d1nfdfl1  
d2mpah1 d2d7t11 d4grwf\_ d4b5ea\_ d1lk3h1 d3u79a\_ d4u3xa\_ d1ghfl1  
d1bvkb\_ d1mcww1 d1b88a\_ d1jrhh1 d32c2b1 d4wemb\_ d1dsfh\_ d1op3h1  
d1cell1 d1iqda1 d1qoka1 d1qoka2 d1qfuh1 d2crya1 d1ay1h1 d1oaql\_  
d3ab0b\_ d1rur11 d1t4kb1 d1bz7b1 d1n0xh1 d1for11 d1lucbl1 d4w6yb\_  
d43c9a\_ d2aabl1 d1tzia1 d4n1ca\_ d1k6qh1 d3g9ab\_ d4tvsal1 d1igmh\_  
d1pz5b1 d3dx9a1 d3wxwh\_ d1nakh1 d1kcul1 d3eaka\_ d4qlra1 d1cr911  
d1d9ka\_ d1f4x11 d1deea1 d2i27n2 d1c12a1 d2orbl1 d1j8hd1 d1mcp11  
d1c5da1 d1kenh1 d1bd2e1 d1h5ba\_ d4x7fc1 d3upaa\_ d1t3fa1 d1indh1  
d2dtgc1 d4hc111 d1zv5a1 d4wgvb\_ d1uwgl1 d4f37k1 d1aqkh1 d1vesa\_  
d3zkqd\_ d1fpt11 d1l0411 d1knob1 d3rrqa\_ d1ct8b1 d4orz\_ d1mlbb1  
d4hgkc1 d1dqdl1 d1bogb1 d4ozhe1 d1dr9a1 d1i7za1 d1dn0b1 d1kell1  
d1rzib1 d1ypzfl1 d1wtla\_ d1hkfa\_ d1fail1 d1figh1 d2vyre\_ d1sjva\_  
d1ohqa\_ d1bfoa1 d1pkqb1 d1mjul1 d1b4jl1 d1nsn11 d2arjb1 d1p4bh\_  
d4aj0a\_ d3nn8b\_ d2rcja1 d1f2xk\_ d4v1dd\_ d1adqh1 d2eksa\_ d4k3ga\_  
d1jfqh1 d1uweh1 d1frgh1 d4gftb\_ d1uz8b1 d4n1ea\_ d1bm311 d1cl011  
d3mcka1 d2vq1a1 d1ae6h1 d4aq1b1 d1uj3b1 d1nbqa1 d1fh511 d2ck011  
d2ywza\_ d1q7211 d4nbxb\_ d1hila1 d4hz1b1 d2j8811 d1zmya1 d1cd0a\_  
d1a4ka1 d1psk11 d1a0qh1 d4krmb\_ d1ncbh1 d2fbjh1 d1j8he1 d1i3ua\_  
d1cf811 d1fe8h1 d2p1ya1 d1eeqa\_ d2x89a\_ d1ol0a\_ d2r01h1 d1ub5a1  
d1dfbh1 d3eyvb1 d4jdvb1 d4p2cg\_ d2gsia1 d2agj11 d1u3ha1 d2h1ph1  
d1rih11 d1fskc1 d1boga1 d2a7711 d1osp11 d1qfoa\_ d3dwta\_ d2fx711  
d1rz711 d3stba1 d1pkqa1 d1b6da1 d1dzba2 d1dzba1 d1kj2a\_ d4l1ha\_  
d1rzgb1 d1dq1h\_ d12e811 d1miel1 d1jmaa\_ d1sbs11 d1fgnh1 d1f5811  
d1mqkh\_ d1ndgb1 d3qeg11 d1iail1 d2aw2a1 d1tqbc1 d3fo2a1 d4dkaa\_  
d1f8th1 d2g6011 d2ywya\_ d1uj3a1 d1yc7a\_ d3bd3a\_ d4w6xb1 d1nmb1\_  
d1i8ka\_ d1rjlb1 d1ypze1 d1p7kb1 d1kxqe\_ d1gpoh1 d2z4qa1 d1w72h1  
d1i9r11 d4qgya1 d4xt1c\_ d2qqnh1 d1cica1 d3c08h1 d2cd0a\_ d2bdnh1  
d1hnga1 d1mam11 d1nldh1 d1cr9h1 d4lcih1 d3bkyh1 d3qg711 d1ai111

d1kxvc\_ d4iosd\_ d1l7ih1 d2x1qa\_ dlub6b1 d3k74b\_ dlibgh1 dlteth1  
dligya1 dlhxma1 d2x6ma\_ d2e71a\_ d5e03a\_ dlqfwm\_ d2r0kh1 dligjb1  
dlrurh1 dlplgh1 dlmj8h1 d1yuhb1 d3fmg11 d1rzfl1 d1emtl1 d1ad9b1  
dligtb1 d1n1bl1 d1d5ih1 d3k7ua\_ d4ffyh\_ d1bwwa\_ d3dvga1 d1a6ta1  
dlfgvl\_ d4qxgl1 d1mim1 d1jh11\_ d2hffb1 d2hh011 d1qkzh1 d1l7t11  
d1afvh1 d1iaii1 d2cjuh\_ d1um5h1 d2ghwb2 d2ghwb1 d1kgce1 d2fgwh1  
dlikfh1 d1dvfd\_ d2i24n1 d2xtjb\_ d1za3b1 d2yc1a\_ d2hh0h1 d2x1oa\_  
d1bvka\_ d1rjla1 d5e7ba1 d1igta1 d1i11b1 d2fb411 d1mvua\_ d1jpt11  
d32c2a1 d1fvca\_ d1iqdb1 d2hrph1 d2p4ab\_ d4qola\_ d1p2cb1 d1wt5c\_  
d1t4ka1 d5c1mb\_ d1it911 d1bz7a1 d1b2wh1 d1e4w11 d1jnl11 d1yedb1  
d1za6b1 d3u7aa\_ d1igfh1 d3gnml1 dlorsa1 d1wejl1 d1a2ya\_ d1hxmb1  
d1gafh1 d2j4wh1 d1pz5a1 d1j05a\_ d1a3rh1 d4fq111 d1qfwh\_ d1eo8h1  
d1n7mh1 d4s11a\_ d1kegh1 d5da4a\_ d1iqwl1 d3whxb1 d1vgeh1 d1deeb1  
d1c12b1 d1t2q11 d1ad9a1 d3gsnb1 d3b2uc1 d1ggbh1 d1t3fb1 d1nak11  
d4ocmc\_ d1lila1 d2v7hb3 d2esve1 d1mcoh1 d2qr0b1 d2q3aa\_ d1ct8a1  
d1kcr11 d2pxyb\_ d2uzih\_ d5c31d\_ d3durb\_ d1c5c11 d2ak4e1 d1d17h\_  
d1xiwd\_ d1mlba1 d1rmfl1 d1i7zb1 d1dlf1\_ d2xa3a\_ d5bq7b1 d1dqqb1  
d3h4211 d1egjh1 d1kcv11 d1fe811 d2j6e11 d1f3rb2 d1l1k311 d1sm3h1  
d1q0xh1 d1ghfh1 d7fab11 d1igch1 d1l00h1 d4idla\_ d5c2b1\_ d1jrh11  
d1l11a1 d3zhda1 d4kffc\_ d1b0wa\_ d1e6oh1 d1mex11 d4krpb\_ d1fnsh1  
d1ncwh1 d4hgma\_ d4eigb1 d4rzca\_ d2mpa11 d4y5xa\_ d5en2b1 d3lrga1  
d4ej1c1 d1rhha1 d1j05b\_ d1forh1 d1q9wb1 d2wzpd\_ d2aq2a1 d1h0da1  
d3revb1 d2ij0c1 d1tzha1 d4m7j11 d1k6ql1 d3b9kc1 d1igml\_ d3qeua1  
d1dsfl\_ d1ce1h1 d1kcu11 d1zvha1 d1zvoa1 d1tqbb1 d1ay111 d2qsc11  
d2cgrh1 d1n10h1 d1ken11 d3eo0a1 d4n9ob1 d1n0x11 d3k1kc\_ d2aq2b1  
d1enf11 d1i4pa1 d1v1oa1 d1et9a1 d1esfa1 d2g9hd1 d4ohja1 d1klud1  
d1bxta1 d1eu3a1 d1ty0a1 d1fnua1 d2cqva1 d1fhga\_ d2k1ma\_ d1biha3  
d1biha1 d1biha4 d3qp3a1 d1g1ca\_ d1gxea\_ d1cvsc2 d1cvsc1 d1xmwa2  
d1m4ka2 d2otpa2 d1biha2 d1rhfa2 d2fcba2 d2fcba1 d1wwbx\_ d1gsma2  
d1epfa1 d1epfa2 d2dava1 d1waaa\_ d1f97a2 d1x44a1 d1vcaa2 d1fnla2  
d1fnla1 d3b5ha2 d3h8na2 d3h8na1 d1jbja1 d1jbja2 d1pd6a\_ d1f2qa2  
d1f2qa1 d3cx2a\_ d1nbqa2 d3b5ha1 d1n26a1 d1xiwb\_ d1xaua\_ d1fltx\_  
d2ifga1 d1olla1 d1olla2 d1cs6a4 d1cs6a3 d1cs6a2 d1cs6a1 d2gw5a2  
d1sy6a1 d1xiwa\_ d1lucta2 d1lucta1 d1ry7b2 d1gl4b\_ d1qz1a3 d1olza1  
d2c9aa1 d1wwca\_

**Family-52 (c.2.1.4)**

**Positive dataset contains 2 protein sequences.**

d1v8ba1 dlygya1

**Negative dataset contains 3878 protein sequences.**

dlorva2 d1xfda2 d1m32a\_ d1libja\_ d1c7na\_ d1iuga\_ d4q75a\_ d2bkwa1  
d1t3ia\_ d1n8pa\_ d1qz9a\_ d1jff9a\_ d1leg5a\_ d3kgwa\_ d1c11a\_ d2ctza1  
d1vjoa\_ d2rfva\_ d1gc0a\_ d1cs1a\_ d1d2fa\_ d2ch1a1 d1qgna\_ d1pffa\_  
d1elua\_ d1u08a\_ d1lc5a\_ d1b5pa\_ d2ay1a\_ d1bw0a\_ d3pd6a\_ d7aata\_  
d2csta\_ d1j32a\_ d1fg7a\_ d4wlha\_ d1o4sa\_ d1v2da\_ d1gdea\_ d1v72a1



d1svva\_ d1ajsa\_ d1wsta1 d2f8ja2 d1lk9a\_ d1vp4a1 d1xi9a1 d2gb3a1  
d1yaaa\_ d1xkla\_ d2wfla\_ d3i2ka1 d1lnsa3 d1mpxa2 d1xkta1 d2hfka\_  
d5d3ka\_ d2cfba1 d1dfoa\_ d1o69a\_ d1bj4a\_ d3k28a\_ d2bwpa\_ d3lg0a\_  
d2fnua\_ d3ou5a\_ d1z7da1 d1iaya\_ d4msoa\_ d1bs0a\_ d1s0aa\_ d1sffa\_  
d3tqxa\_ d1mdoa\_ d3qboa\_ d3pgya\_ d1bjna\_ d2dkja\_ d1ejia\_ d1vefa1  
d4wxga\_ d3bs8a\_ d3gbxa1 d1w23a\_ d1sefa\_ d1sfna\_ d1sq4a\_ d1r0ka3  
d1j5pa3 d1vkoa2 d1vm6a2 d3qvsa2 d1gr0a2 d1ddla\_ d1auyb\_ d1f56a\_  
d1bypa\_ d1lazca\_ d1ws8a\_ d3u25a\_ d1cuoa\_ d1id2a\_ d1rkra\_ d2iaac\_  
d4dp1x\_ d1nwpa\_ d2gima\_ d2i7sa\_ d1qhqa\_ d3ehbb1 d1fftb1 d1gyca3  
d1hfua2 d1kbva1 d1kbva2 d1sdda1 d1sdda2 d1gyca1 d1gyca2 d1mzya1  
d2bw4a1 d1aoza3 d1aoza2 d1kyaa2 d1kyaa3 d1kyaa1 d1mzya2 d4e9sa1  
d1sddb1 d1sddb2 d1hfua1 d1hfua3 d1oela2 d1oela1 d1v10a2 d1v10a3  
d1v10a1 d1novc\_ d2bbvc\_ d1a3qa1 d1iknc\_ d3brda1 d1p7hl1 d1oy3c\_  
d1gjia1 d1zk9a1 d2cxka1 d2bema\_ d1pama1 d1qhoa1 d2fhfa2 d2fhfa1  
d1k3ia1 d1j0ha1 d1csla1 d2bhua1 d1edqa1 d1flsa2 d1lut9a2 d1gvia1  
d1txka1 d1zx5a1 d2phla2 d2phla1 d1fxza2 d1fxza1 d1uija1 gldgw.1  
d2v09a\_ d1uika2 d1uika1 d1dgwa\_ d1nepa\_ d1ktja\_ d1ds6b\_ d1fstb\_  
d3us3a3 d3us3a1 d4w9ta\_ d1jvna1 d4x2ra1 d1ka9f\_ d4axka1 d1thfd\_  
d1h5ya\_ d4u28a\_ d2y88a\_ d4wd0a\_ d1vzwa1 d1tafa\_ d1tafb\_ d1jfib\_  
d1q9ca\_ d1h3ob\_ d2byka1 d1n1ja\_ d4g92b\_ d1bh9a\_ d1jfia\_ d1h3oa\_  
d2bykb1 d1n1jb\_ d2bjca1 d2hsga1 d1qpza1 d1efaa1 d1ydw2 d2nvwa2  
d1h6da2 d1zh8a2 d1qkia2 d1xeea2 d1t1ta2 d1ebfa2 d1au7a2 d1lic8a2  
d2ovga\_ d1sq8a\_ d1rzsa\_ d3kz3a\_ d3orca\_ d3gpdg2 d2q49a2 d1hdgo2  
d2g17a2 d2cvoa2 d2czca1 d3pwka2 d1obfo2 d1zyao2 d2pkgo2 d1b7go2  
d2hjsa2 d1cf2o2 d1vkna2 d1nvmb2 d2msya\_ d2djoa1 d2r5za\_ d1au7a1  
d1f43a\_ d2lmda1 d1akhb\_ d1s7ea1 d3nara\_ d1zq3p1 d2craa1 d1mija\_  
d4uuta\_ d3a01a\_ d1x58a1 d3rkqa1 d3cmya1 d2cqa1 d2da6a1 d1e3oc1  
d1fjla\_ d1mh3a1 d1x41a1 d1wh7a1 d1gt0c1 d2mw8a\_ d1lfup\_ d1x2ma1  
d1b72a\_ d1wi3a1 d1jgga\_ d1wjha1 d1x2na1 d1nmnc\_ d2cuea1 d3k2aa\_  
d2hosa\_ d2jwta2 d1pufa\_ d1oetc1 d2hi3a\_ d1b8ia\_ d4j19a\_ d3lnqa\_  
d1wh5a1 d1b8ib\_ d2cgra1 d1guua\_ d1ug2a1 d2cqa1 d2ajea1 d4a69c\_  
d1h8ac1 d2crga1 d2iw5b1 d1xc5a1 d1ofcx1 d2cu7a1 d1wgxa1 d2cjja1  
d2ckxa1 d1gvda\_ d1hcra\_ d1tc3c\_ d1gdta1 d1u78a2 d1hlva2 d1iufa2  
d1iufa1 d2iu5a1 d1zk8a1 d2g7sa1 d2fd5a1 d2np5a1 d1z0xa1 d2id6a1  
d2d6ya1 d2i10a1 d1vi0a1 d2oi8a1 d3c07a1 d2ns7a1 d2fq4a1 d2yvea1  
d1t33a1 d2o7ta1 d1rkta1 d2np3b1 d2g7ga1 d2gena1 d2fbqa1 d2g71a1  
d2gfna1 d2g3ba1 d2jj7a1 d2hyja1 d1sgma1 d1ui5a1 d2hkua1 d2id3a1  
d4jyka1 d1b10a1 d1b10a2 d1d5ya1 d3lv8a\_ d1s3ga1 d1zaka1 d1s4qa\_  
d3tvta2 d1uf9a\_ d1khta\_ d1ckea\_ d1osna\_ d1p5zb\_ d4tmka\_ d3cm0a\_  
d1tmka\_ d1jaga\_ d3h86a\_ d1t0hb\_ d1nn5a\_ d2h92a\_ d3kb2a1 d2c95a1  
d1yj5a2 d1kgda\_ d1ly1a\_ d2ak3a1 d1vyva2 d1deka\_ d2grja1 d1p3ja1  
d1y63a\_ d1e4ya1 d1s96a\_ d3iija1 d1lvga\_ d1nksa\_ d1vyua2 d4e22a\_  
d1qf9a\_ d1jjva\_ d1q3ta\_ d1ki9a\_ d1lw7a2 d1teva\_ d1kjwa2 d1gsia\_  
d2iyva2 d1viaa\_ d1e6ca\_ d1g3ma\_ d1j99a\_ d1t8ta1 d1fmja\_ d1zrha\_

d1ls6a\_ d2a3ra\_ d1aqua\_ d2zptx\_ d3ckla\_ d1texas\_ d1q44a\_ d2gwha\_  
d1odfa\_ d1uj2a\_ d4gi7a\_ d2jeoa1 d1k6ma1 d1z0ja1 d3umra2 d3gj0a1  
d2gaoa1 d1yzga1 d1x3sa1 d1g7sa4 d1puja\_ d1udxa2 d1kk1a3 d2o52a\_  
d1jwyb\_ d1zcaa2 d1zcba2 d2fv8a1 d2cjwa\_ d3dz8a1 d1xzpa2 d1vg8a\_  
d4qxaa\_ d2ew1a1 d1x1ra1 d2bcgy\_ d3doea1 d3cona\_ d3rega\_ d3wyga\_  
d1upta\_ d2b6ha1 d1zd9a1 d1lnza2 d1r5ba3 d1n0ua2 d1r2qa\_ d2f91a1  
d2rhda\_ d3q3jb\_ d3q85a\_ d1efma1 d1r8qa\_ d2gf9a1 d2akab1 d1ek0a\_  
d1z08a1 d2gcoa1 d2dy1a2 d4g01b\_ d2cxxa1 d1svia\_ d3q72a\_ d1ni3a1  
d4ac9a4 d2erxa1 d2bmea\_ d1wxqa1 d2gf0a1 d4ldja1 d1zunb3 d1d5ca\_  
d41v5b\_ d1efca3 d1kmqa\_ d2g6ba1 d3lrpa\_ d1tada2 d2y8ea\_ d4rd4a1  
d1z06a1 d2heia\_ d3a58b\_ d1u01a2 d1d2ea3 d1zj6a1 d2ocba\_ d3rwoa\_  
d1mr3f\_ d2e9sa1 d4u5xa1 d2iwra\_ d2fn4a1 d3bwdd\_ d2nzja1 d2atva1  
d2ksqa\_ d3l43a\_ d1mkya2 d1mkya1 d1wmsa\_ d1jn3a3 d2rmka\_ d1f6ba\_  
d1f60a3 d1gota2 d1jala1 d2fh5b1 d1g16a\_ d2wblc\_ d1m7ba\_ d1wf3a1  
d1f5na2 d1t9ha2 d1z6xa1 d1z0aa1 d2fg5a1 d2a5ja1 d2bcjq2 d1s0ua3  
d1ky3a\_ d4y0va\_ d4lhwa\_ d2qmea1 d2atxa1 d1legaa1 d1ryha\_ d1moza\_  
d1nrjb\_ d2erya1 d3bfka\_ d1puia\_ d3j3az1 d3t5ga\_ d1shza2 d3defa\_  
d2f7sa1 d3raba\_ d3tsoa\_ d3aq4a\_ d2a17a1 d3sfva1 d3bc1a\_ d2ncda\_  
d1sdma\_ d3h4sa1 d2heha\_ d2grya\_ g3kin.1 d1kk8a2 d1br2a2 d1goja\_  
d1f9va\_ d2mysa2 d1lkxa\_ d3t0qa\_ d4db1a1 d3gbja\_ d1ry6a\_ d1v8ka\_  
d1k8ka2 d1k8ka1 d3uleb1 d3i33a2 d3i33a1 d1bupa1 d1dkgd2 d1dkgd1  
d4ci6a2 d1jcf1a1 d4a2ba2 d2fxua1 d1yaga2 d1yaga1 d4cbua2 d1bupa2  
d3vrda1 d3vrda2 d1fcdc2 d1fcdc1 d1h1oa2 d1m70a2 d1m70a1 d1ig8a1  
d1czan2 d1czan3 d1czan1 d1ig8a2 d1czan4 d1bg3a4 d1bg3a2 d1bg3a1  
d3h3no1 d3h3no2 d3ezwa2 d3h1jd1 d2d0oa3 d2d0oa2 d1nbwa2 d1hroa\_  
d4gedb\_ d3zooa\_ d1mz4a\_ d1gu2a\_ d1f1fa\_ d1dvva\_ d1c6ra\_ d1c75a\_  
d1e29a\_ d1gdva\_ d1cnoa\_ d1h32b\_ d1co6a\_ d2bh4x\_ d2aiua\_ d5cytr\_  
d1jdl1a\_ d1i8oa\_ d2zboa\_ d3dmia\_ d1ls9a\_ d1wvec\_ d2yk3a\_ d3ph2b\_  
d1dw0a\_ d5aura\_ d1ql3a\_ d1qn2a\_ d1f1ca\_ d2nqya\_ d1h4ga\_ d1hixa\_  
d1oa2a\_ d1olra\_ d3b7ma\_ d4h7ma1 d3wp3a\_ d2vgda\_ d1ligoa\_ d3zsea\_  
d2nlra\_ d3wx5a\_ d1oa3a\_ d1pvxa\_ d1m4wa\_ d1f5ja\_ d1oa4a\_ d1ks5a\_  
d4ix1a1 d2ah2a1 d1evsa\_ d1cnt1\_ d1pvhb\_ d1z7ca\_ d1huwa\_ d1bgea\_  
d1f6fa\_ d1f45b\_ d1i1rb\_ d1axia\_ d1letea\_ d3tgxb\_ d2z3qa1 d3qb1a\_  
d1hula\_ d1m48a\_ d4nkqb\_ d1eera\_ d1v7mv\_ d5e4ea\_ d2o27a\_ d3b5ka\_  
d2psma1 d4zf7a\_ d3uf5a\_ d4x51a\_ d4ypgc1 d3oq3a\_ d1lqsl\_ d1n1fa\_  
d1aula\_ d1wu3i\_ d3bes1\_ d3ux9a\_ d3rbaa\_ d2qtra\_ d1nupa\_ d3l92a\_  
d1f9aa\_ d1qjca\_ d2h29a\_ d1vlha\_ d1od6a\_ d1lw7a1 d1mrza2 d4ruka\_  
d2e17a\_ d1liq0a2 d1irxa2 d1r6ta2 d1ivsa4 d2cyba\_ d1rqga2 d1j09a2  
d2yxna\_ d1f7ua2 d1h3fa1 d2g36a1 d1nzja\_ d1jila\_ d1n3la\_ d1i6la\_  
d1pfva2 d1h3na3 d3n9ia\_ d3sz3a1 d3sw2a\_ d1moxc\_ d1dx5i3 d1edmb\_  
d1aut12 d1aut11 d1nqlb\_ d1dval1 d1szba2 d1kigl\_ d2y5f1\_ d1ijqa2  
d1gk5a\_ d1g1sa2 d1nt0a3 d1xdtr\_ d1lmja2 d1lmja1 d1nzia2 d2wphe\_  
d1kli1\_ d1pfx12 d1pfx11 d1p9ja\_ d1g1ta2 d1f7ea\_ d4yzub\_ d2mgpa1  
d1b9wa1 d2mgpa2 d1obl1c1 d1obl1c2 d1n1ia2 d1n1ia1 d2npra2 d2npra1

d1m1xb5 d2y5ia\_ d1psra\_ d3n22a\_ d2egda\_ d4ggfc\_ d2wcea\_ d2luca\_  
d4aqia\_ d3nsia\_ d2lp3a\_ d1j55a\_ d1a4pa\_ d1k8ua\_ d1nsha\_ d1pvaa\_  
d3fs7a\_ d2pvba\_ d1ttxa\_ d1rwy\_ d2kyfa\_ d1rk9a\_ d1a75a\_ d1exra\_  
d1tiza1 d1nyaa\_ d1g8ia\_ d1ggwa\_ d1wdcc\_ d3fwba\_ d1ggza\_ d2o5ga\_  
d1ctaa\_ d3i5gc\_ d1s18a\_ d1fpwa\_ d2scpa\_ d2roaa\_ d4aqra\_ d3pn7b\_  
d1br1b\_ d2mysb\_ d1s6ca\_ d1bjfa\_ d2obha\_ d1jfka\_ d1jf0a\_ d1qv0a\_  
d1lkja\_ d2mlfc\_ d2m97a\_ d2d8na\_ d4by5a\_ d1jbaa\_ d4nqga\_ d1wdcb\_  
d2mysc\_ d1j7qa\_ d1s6ia\_ d1uhka2 d1r2ua\_ d1dtla\_ d3kf9a\_ d3pn7c\_  
d1qjta\_ d1c07a\_ d5d67d\_ d1tuza\_ d1h8ba\_ d1eg3a2 d2zkmx1 d1snla\_  
d1gjya\_ d1y1xa\_ d1hqva\_ d1dvia\_ d1df0a1 d1qxp2 d4usla\_ d1k94a\_  
d1wkya2 d1uuqa\_ d3wh9a\_ d4m1ra\_ d4xuya\_ d2je8a5 d4bf7a1 d3cuia\_  
d1ur4a\_ d1qw9a2 d1odza\_ d2vzsa5 d1bqca\_ d2x2ya1 d1hjqa\_ d1qnra\_  
d4y7ea1 d1vjza\_ d4k68a\_ d2v3ga\_ d4hpga\_ d1nofa2 d1nq6a\_ d1h4pa\_  
d1aq0a\_ d3ziza\_ d4bs0a\_ d1ecea\_ d1h1na\_ d1ta3b\_ d1w91a2 d1i1wa\_  
d1uhva2 d1us3a2 d1egza\_ d7a3ha\_ d1tvna1 d3nyda1 d1ghsa\_ d2cyga1  
d4xv0a\_ d2c8na2 d1w32a\_ d3emca\_ d1v6ya1 d1foba\_ d2uwfa1 d2fgla\_  
d3niya1 d2c0ha1 d1rh9a1 d1yq2a5 d1szna2 d1fa2a\_ d1pama4 d5do8a1  
d1ea9c3 d1hx0a2 d2fhfa5 d1qhoa4 d1avaa2 d1m53a2 d4m8ua1 d2gjpa2  
d1lwha2 d4howa1 d1ktba2 d1j0ha3 d3vm5a1 d2x1ia\_ d1wzaa2 d1uasa2  
d2diea1 d1mxga2 d1ht6a2 d1eswa\_ d1iv8a2 d5cpsa\_ d1ud2a2 d1zjaa1  
d3gbea1 d1kwga2 d1wdpa\_ d1gcya2 d1g5aa2 d1hvxa2 d3dhpa2 d2bhua3  
d4do4a1 d3qgva1 d1e43a2 d1g94a2 d2d3na2 d1gjwa2 d1gvia3 d1x1na1  
d1r7aa2 d1tz7a1 d4c7ga2 d2gjxa1 d1nowa1 d1yhta1 d4toqa\_ d1wb0a1  
d1w9pa1 d1eoka\_ d1itxa1 d1kfwa1 d1goia2 d1edqa2 d2gsja\_ d1hjxa1  
d1vf8a1 d1etob\_ d1umqa\_ d1g2ha\_ d1mixa2 d1e5wa2 d1isna2 d2a16b2  
d1g4ma2 d1eh3a\_ d3skpa\_ d1dtza1 d1ieja\_ d1jnfa2 d1ce2a1 d1jnfa1  
d1b1xa2 d1b1xa1 d1jw1a1 d1jw1a2 d1ryoa\_ d1h76a1 d1h76a2 d1wgqa1  
d1v89a1 d2coda1 d1zc3b\_ d1wg7a1 d1u5ea1 d1v61a1 d2coca1 d2ys1a1  
d1v5pa1 d1ntya2 d1wjma1 d1wila1 d1u29a\_ d1xx0a1 d1unqa\_ d2zkmx3  
d1fhoa\_ d1v88a1 d2adza1 d1x1fa1 d1p6sa\_ d2coaa1 d1btka\_ d1v5ma1  
d1faoa\_ d2x18a\_ d1dyna\_ d1x1ga1 d4kaxb\_ d2j59m1 d1kilb2 d1xcga2  
d1txda2 d1u5da1 d1dbha2 d1w1ha\_ d1upqa\_ d1v5ua1 d1foea2 d2fjla1  
d1eaza\_ d2dfka2 d2cofa1 d1kz7a2 d1h6ta1 d1h6ua1 d3wdpp1 d3wq5a\_  
d1gnxa\_ d4gxpa\_ d4hz8a\_ d1e4mm\_ d3aiua\_ d1wcca1 d1qvba\_ d3ahxa\_  
d1v02a\_ d2dgaa\_ d1pbga\_ d1vffa1 d1qoxa\_ d4ha4a\_ d1r55a1 d3gboa\_  
d1atla\_ d1kufa\_ d1buda\_ d4q1la\_ d1quaa\_ d1yp1a\_ d1wnia\_ d2gfoa1  
d1vjva\_ d2ayna1 d3nhea\_ d3nqyb\_ d4gera\_ d1e2ta\_ d4c5pa\_ d2bsza1  
d4bgfa\_ d1w4ta1 d1ex0a4 d2f4ma1 d1x3za\_ d1mdwa\_ d1qxp4 d1ziva1  
d1zcmal d2w0pa\_ d2diaa1 d2e9ia2 d2e9ja1 d2dj4a1 d2eeba1 d2diba1  
d2dmba1 d2dmca1 d2d7oa1 d2ee6a1 d2d7pa1 d2eeaa1 d2di8a1 d1wlha1  
d2d7na1 d2nqca\_ d2d7ma1 d2dica1 d3cnka\_ d2k3ta1 d2eeca1 d1qfha2  
d2bp3a1 d1v05a\_ d2ee9a1 d2eeda1 d2di9a1 d3ioqa\_ d1fh0a\_ d1o0ea\_  
d1khqa\_ d1m6da\_ d2cb5a\_ d1cs8a\_ g8pch.1 d1s4va\_ d2pnsa\_ d1vsna1  
d1mira\_ d1liwda\_ d2oula\_ d7pcka\_ d3bwka\_ d3bcna\_ d2p86a\_ d1pvja\_

d1pcia\_ d1gece\_ d1deua\_ d4bs6a\_ d1xkga1 d1cqda\_ d1jqpa2 d2c0ya\_  
d2bdza\_ d3p5ua\_ d1zoya1 d1qo8a2 d1d4ca2 d1chua2 d1jnra2 d2jk6a2  
d2jk6a1 d1feca1 d1feca2 d1lpfa1 d1lpfa2 d1xhca1 d1xhca2 d1dxla2  
d1dxla1 d1gera2 d1m6ia2 d1onfa1 d3lada2 d3lada1 d1w4xa1 d1w4xa2  
d1gesa2 d1mo9a1 d1xdia1 d1fl2a2 d1fl2a1 d1fcda1 d1fcda2 d1h6va2  
d1h6va1 d1mo9a2 d1gv4a2 d1gv4a1 d2gv8a2 d2gv8a1 d1aoga1 d1aoga2  
d1hyua1 d1ebda1 d1ebda2 d3dk9a1 d1q1ra2 d1q1ra1 d1gesa1 d1zbfal  
d2z1ha\_ d2etja1 d3qioa1 d1j11a\_ d2e41a\_ d1j12a\_ d21sna1 d1io2a\_  
d1uaxa\_ d2yv0x\_ d1mu2a1 d1lekea\_ d1i39a\_ d1pn0a1 d1ju2a1 d2f5va1  
d3c96a1 d2gmha1 d1pj5a2 d1gpea1 d1o5wa1 d1n4wa1 d1k0ia1 d2dw4a2  
d2ivda1 d1seza1 d2voua1 d1kdga1 d1s5ja1 d2hbja2 d2igia\_ d1wlja\_  
d1qhta1 d4dlea1 d1tgoa1 d2f96a1 d3tr8a1 d3mxma\_ d1q8ia1 d1y97a1  
d1w0ha\_ d1kfsa1 d2py5a1 d1noya\_ d1d5aa1 d1yt3a3 d2guia\_ d3mwpal  
d4kb1a\_ d2v76a\_ d1wj1a1 d1aqca\_ d1qqga2 d1qqga1 d1n3ha\_ d4dbba\_  
d3f0wa1 d1p3ra\_ d1wgua1 d2cy4a1 d3hqca\_ d1wvha1 d1xr0b1 d2av4a1  
d3nvva1 d1krha3 d2h88b1 d1t3qa2 d1kf6b2 d1zoyb1 d1jq4a\_ d1ffva2  
d1dgja2 d1rm6c2 d1r7ha\_ d1faaa\_ d1wika1 d1xfla\_ d1ttza1 d2f51a1  
d1ti3a\_ d1nhoa\_ d1sena\_ d2i4aa\_ d1lep7a\_ d1zmaa1 d1fo5a\_ d3lefa1  
d3diea1 d2yana1 d1z6na1 d1oaza\_ d3zywa1 d4aj8a\_ d1nm3a1 d4fiwa\_  
d1wmja\_ d4hs1a1 d1iloa\_ d1xwaa1 d1wjka1 d2vm1a\_ d1fb6a\_ d1gh2a\_  
d1h75a\_ d1nw2a\_ d1kx5b\_ d3a6na\_ d4m6ba2 d2nqbd\_ d3wkjd\_ d2yfwe\_  
d4h9na\_ d5bnxa\_ d1kx5c\_ d3r45a\_ d1eqzb\_ d4jjnb\_ d1f66c\_ d1eqza\_  
d4wnnb\_ d1kx5a\_ d1u35c1 d1id3a\_ d2nqbc\_ d1kx5d\_ d1ku5a\_ d1f1ea\_  
d1um8a\_ d1lixza\_ d1qvra2 d1qvra3 d1qzma\_ d1sxjc2 d1jr3d2 d2p65a\_  
d1l8qa2 d1g8pa\_ d3hu3a3 d1sxjd2 d1njfa\_ d1in4a2 d1sxja2 d1tuea1  
d2ce7a2 d1w5sa2 d1sxjb2 d1ny5a2 d1ofha\_ d2gnoa2 d2a5yb3 d1fnna2  
d1u0ja1 d1lv7a\_ d1iqpa2 d2fnaa2 d1ixsb2 d4gita\_ d1sxje2 d1g41a\_  
d1pd212 d2a2ra2 d1k0dd2 d1f2ea2 d1gsua2 d1f3ba2 d2fhea2 d2pvqa1  
d1tw9a2 d1oyja2 d1e6ba2 d1k0ma2 d3ik7a1 d4is0a1 d1r5aa2 d1jlva2  
d1m0ua2 d3gtub2 d1z9ha2 d1okta2 d1axda2 d2gsra2 d1tu7a2 d1k3ya2  
d1zgma1 d1b48a2 d1gnwa2 d1gwca2 d2gsta2 d1glqa2 d1oe8a2 d1pn9a2  
d1v2aa2 d1fw1a2 d1duga2 d1g7ea\_ d1nira1 d1qksa1 d1qqya\_ d1gd6a\_  
d1f6ra\_ d2gv0a\_ d1iiza\_ d2z2fa\_ d1j8xa\_ d1ghla\_ d1b9oa\_ d1741a\_  
d1691a\_ d2o4wa\_ d1p37a\_ d1k28a3 d1xjta1 d1jtma\_ d2f2qa\_ d4e97a1  
d1mpya2 d1kw3b2 d1kw3b1 d4ghga1 d1tfza1 d3isqa1 d3isqa2 d1sqia1  
d1sqia2 d1lkda1 d1mpya1 d1cjxa2 d1cjxa1 d1sp9b2 d1t47a1 d1t47a2  
d1f1ua2 d1sp8a1 d1sp8a2 d1f1ua1 d4iuaa3 d4bvva\_ d5hpga\_ d3k65a\_  
d1ki0a3 d1ki0a2 d1ki0a1 d1a0ha1 d1pmla\_ d3sp8a3 d2feba1 d1qsta\_  
d2beia1 d4m3sa\_ d1u6ma1 d1ygha\_ d1yk3a1 d3dr6a\_ d1xmta\_ d1z4ea1  
d2ge3a1 d1bo4a\_ d2fiaa1 d2jdca1 d1y9wa1 d3to7a\_ d1wwza1 d2f14a1  
d2ozua1 d2b5ga\_ d2cy2a1 d2p0wa\_ d1cm0a\_ d4pswa\_ d1yrea1 d1yr0a1  
d1m4ia\_ d2gana1 d1yvka1 d1ghea\_ d2g3aa1 d1y7ra1 d2euia1 d1q2ya\_  
d2fsra1 d1xeba\_ d2ae6a1 d1cjwa\_ d1qsma\_ d2aj6a1 d1y9ka1 d1i12a\_  
d1vkca\_ d2atra1 d1n71a\_ d2d4pa1 d2fiwa1 d2fe7a1 d1tiqa1 d2ou2a\_

d1yx0a1 d2fcka1 d1p0ha\_ d2j8ma\_ d2pq8a\_ d1z4ra1 d1s3za1 d1ufha\_  
d1f37b\_ d1xvqa1 d1pn0a2 d3hy2a\_ d2cvba1 d1o8xa\_ d1lu4a\_ d1we0a1  
d2bmxal d2a4va1 d1psqa\_ d1xiya1 d1q98a\_ d1n8ja\_ d1zofa1 d2ggta\_  
d3tjja\_ d4jelal d3s9fa\_ d2zcta\_ d1qmva\_ d1jfua\_ d2b1ka\_ d5dvba1  
d2b5xa1 d2v2ga\_ d1st9a\_ d3tb2a\_ d4llra\_ d4fh8a1 d1e2ya\_ d1knga\_  
d2h30a\_ d1i5ga\_ d2z9sa\_ d2f8aa1 d1tp9a1 d2b7ka\_ d1nm3a2 d3hvva\_  
d2wfca1 d4kcea\_ d1xvwa1 d4gqca1 d3qpma\_ d4k1fa\_ d1zzoa1 d1gpla\_  
d1prxa\_ d4od7a1 d1z6ma1 d4mcua1 d4dvca1 d1r4wa\_ d3l9sa\_ d1un2a\_  
d3rppa\_ d2qked\_ d4ksoa\_ d1t4za1 d1wwja\_ d4mh8a\_ d4i7ga1 d1ysl1x\_  
d4hs9a\_ d1ex9a\_ d1ku0a\_ d3qmma\_ d1lgya\_ d4l3wa\_ d1gz7a\_ d1lukca\_  
d1cr6a2 d3groa\_ d1pjaa\_ d1ei9a\_ d1ra6a\_ d3gsza\_ d1khva\_ d1te9a\_  
d2xwha\_ d3uqsa\_ d3hkwa\_ d3n6ma\_ d2cjqa\_ d2xyma\_ d1teba\_ d1te8a\_  
d1s48a\_ d1u09a1 d4wfxa\_ d3tyqa\_ d2pgga1 d2ddfa\_ d3p0ya1 d1igra1  
d1igra2 d1n8yc2 d1n8yc1 d1m6ba2 d1m6ba1 d1jx4a2 d3gv5b1 d1t94a2  
d3bq0a2 d2tbvc\_ d1c8nc\_ d1x36a\_ d1smvc\_ d1ng0c\_ d4sbvc\_ d1lopa\_  
d1f2nc\_ d1cixa\_ d1y29a\_ d1v7fa\_ d2jtba\_ d1d1ha\_ d1g9pa\_ d1lupa\_  
d1qk7a\_ d1mb6a\_ d2a2va\_ d1niya\_ d1i25a\_ d2mpqa\_ d1ie6a\_ d1kqha\_  
d1la4a\_ d2mxoa1 d1d10a\_ d1koza\_ d1qk6a\_ d1emxa\_ d1lqra\_ d1c6wa\_  
d1rmka\_ d1ixta\_ d1eyoa\_ d1cnna\_ d1fu3a\_ d1f3ka\_ d1fyga\_ d3lgia\_  
d3i77a\_ d2z9ia2 d4nsva\_ d1lcya2 d4jcna\_ d1agja\_ d1os8a\_ d1hpga\_  
d1p3ca\_ d1l1ja\_ d1qtfa\_ d1ny721 d1ny722 d1a6ca3 d1a6ca2 d1a6ca1  
d1pgl22 d1pgl11 d1ny711 d1mqta\_ d1d4m3\_ d1fmd3\_ d2mev1\_ glaym.1  
d1ev13\_ d4q4w1\_ d1r1a3\_ d2x5ia\_ d1rhi1\_ glr1a.1 gl1d4m.1 glrhi.1  
d1b35b\_ d1lopa\_ d1tme1\_ d4iv1a\_ glpvc.1 gl1fpn.1 d1fpn1\_ d4gb31\_  
d1d4m1\_ d1fmd1\_ d1ev11\_ d2wzr3\_ glcov.1 d1qqp3\_ gl1fmd.1 d2x5ic\_  
d1rhi3\_ gl1oop.1 d1hxs1\_ gl1hxs.1 d1fpn3\_ d1bev1\_ g2mev.1 d1eah3\_  
d1aym1\_ d1pvc3\_ d1qqp1\_ d1zba3\_ d1h8ta\_ d3vbhc\_ gl1b35.1 gl1bev.1  
d1hxs3\_ gl1ev1.1 d1bev3\_ gl1tmf.1 d1tmf1\_ d1b35a\_ d2mev3\_ gl1eah.1  
gl1h8t.1 d1eah1\_ d4q4w3\_ d1r1a1\_ d1aym3\_ d1pvc1\_ d1zba1\_ d1h8tc\_  
d1loopc\_ d1tme3\_ gl1qqp.1 d4iv1c\_ d1y14b1 d2nn6i1 d1i941\_ d2zjra2  
d1smxa\_ d2qamc2 d2r7da1 d1r12a2 d1wfaq1 d3bzka4 d1x6oa2 d3a0ja\_  
d2j01d2 d2ja9a1 d4q15a\_ d1hr0w\_ d1luza\_ d2n3sa\_ d2vnud1 d1h95a\_  
d1go3e1 d2nn6h1 d1ne3a\_ d2mola\_ d1iz6a2 d1jjga\_ d1e3pa2 d2ix0a3  
d2ix0a2 d2lxja\_ d1ueba3 d1ueba2 d2z0sa1 d1u0la1 d2ix0a1 d2eifa2  
d2je6i1 d3i2za1 d2c35b1 d2ahob2 d1t9ha1 d3i4oa\_ d2qall1 d1jt8a\_  
d2nn6g1 d1g6pa\_ d3cama\_ d1i94q\_ d1c9oa\_ d1d7qa\_ d2ba0a1 d2vnud2  
d2vnud3 d1khia2 d2qalq1 d1wi5a1 d1xta2 d1ny4a\_ d1eixa\_ d3exra\_  
d2ffca1 d2fdsa1 d3n3ma1 d2czda\_ d1q6oa\_ d2yyua\_ d1vqta1 d1dbta\_  
d3ldva1 d4lt9a1 d3tc7a1 d3hoja\_ d1i4na\_ d3vnda\_ d3n18a1 d1geqa\_  
d3naval d1v5xa\_ d4a2ra1 d3tc6a1 d1ujpa\_ d4ijba\_ d1xcfa\_ d1vc4a\_  
d1rd5a\_ d3b5va\_ d2r80b\_ d1cqxa1 d1cg5a\_ d1gcvb\_ d3boma\_ d2h8fb\_  
d2raoa\_ d3bj1a\_ d4hrrb\_ d2r50a\_ d3d1kb\_ d2aa1b1 d3zhwa\_ d3hf4b\_  
d3gdja\_ d1jebb\_ d3bj1b\_ d1x9fb\_ d1wmub\_ d1gcva\_ d3bcqb\_ d3d4xb\_  
d1gvha1 d2dc3a\_ d3hf4a\_ d4yu3a\_ d3k8ba\_ d1qpwb\_ d2r80a\_ d3bcqa\_

d1v4wa\_ d3wtgb\_ d1j17a\_ d4esaa\_ d1a9we\_ d3d1ab\_ d1fsla\_ d4h21a\_  
d1v4wb\_ d1mwca\_ d1vhba\_ d1jeba\_ d1spgb\_ d1h97a\_ d1q1fa\_ d1tu9a1  
d3d1aa\_ d1hdsb\_ d3hyub\_ d2zfb\_ d3fs4a\_ d1oj6a\_ d1shrb\_ d4h21b\_  
d4yu3b\_ d1spga\_ d3hrwa\_ d3qqra\_ d3at5a\_ d4wchd\_ d3hyua\_ d1cg5b\_  
d1uc3a\_ d1hbra\_ d2raob\_ d1outb\_ d4esab\_ d3gdjb\_ d3qqqa\_ d1x9fc\_  
d3vrfa\_ d1litha\_ d3mkba\_ d3d4xa\_ d3mjpa\_ d1j16a\_ d3fh9a\_ d1outa\_  
d2dc3b\_ d1lit2a\_ d3eoka\_ d3g46a\_ d1qpwa\_ d3vrfb\_ d1x9fd\_ d1hdsa\_  
d2zfb\_ d3mkbb\_ d1or4a\_ d3wtga\_ d1a4fa\_ d3fh9b\_ d3bomb\_ d3cy5a\_  
d3at5b\_ d1x9fa\_ d2oifa\_ d4lmb\_ d1cpcb\_ d3v57a\_ d1kn1a\_ d1cpca\_  
d4f0ta\_ d2vjha\_ d4po5b\_ d1eyxa\_ d1alla\_ d4f0tb\_ d1b33b\_ d1b8db\_  
d4h0mb\_ d1b33a\_ d2vjhb\_ d4lm6b\_ d2vmlb\_ d1allb\_ d2vjta\_ d3dbja\_  
d2vmla\_ d2vjtb\_ d4f0ub\_ d1f99b\_ d4rmpa1 d1liaa\_ d1eyxb\_ d2uulb\_  
d4lmsb\_ d4f0ua\_ d2bv8a\_ d1f99a\_ d2bv8b\_ d2c71b\_ d3dbjb\_ d4rmpb1  
d1b8da\_ d4h0ma\_ d3v57b\_ d1liab\_ d2uula\_ d2j96a\_ d1cwva5 g1gxs.1  
g1wht.1 d1hlga\_ d2xqfa\_ d1f6wa\_ d1dx4a\_ d1qe3a\_ d1k4ya\_ d4qwwa\_  
d2ha2a\_ d1r88a\_ d1sfra\_ d4qeka\_ d1rypd\_ d1irua\_ d1rypc\_ d3unfk\_  
d1rypa\_ d1j2pa\_ d1irui\_ d1j2qh\_ d3unfh\_ d1m4ya\_ d1rypb\_ d1irul\_  
d1irug\_ d1iru2\_ d1q5rh\_ d1rypg\_ d1g3ka\_ d1q5qa\_ d1e94a\_ d1irub\_  
d1ryph\_ d3ty6a\_ d1iruj\_ d1iruk\_ d1rype\_ d1irud\_ d1irue\_ d3mi01\_  
d1rypf\_ d1iruh\_ d2z3ba\_ d1iruc\_ d3mka2\_ d1iru1\_ d2qvba\_ d2v9za\_  
d4kafa1 d1b9ra\_ d1offa\_ d1frra\_ d3wcqa\_ d1e9ma\_ d1l5pa\_ d1wria\_  
d1i7ha\_ d3av8a\_ d1rfka\_ d3p1ma1 d3b2ga\_ d2bt6a2 d1s5ja2 d1qhta2  
d4dlea2 d1tgoa2 d3py8a2 d1q8ia2 d1kfsa2 d2py5a2 d1d5aa2 d1f74a\_  
d3l21a\_ d2e1da\_ d1to3a1 d1w3ia\_ d1sfla\_ d1n7ka\_ d1vcva1 d4imea\_  
d1wa3a\_ d2ocza1 d1f2ja\_ d3m16a\_ d2yxga\_ d1ub3a\_ d3a5fa\_ d1fbaa\_  
d1l6wa\_ d1xfba1 d1wx0a1 d1vpxa1 d1ojxa\_ d1mxsa\_ d2a4aa1 d1xkya1  
d3cq0a1 d3s1xa\_ d1f05a\_ d1fdja\_ d3cpra1 d4d2ja\_ d1cg2a1 d1yloa2  
d1y7ea2 d1y0ya3 d1l1fwa1 d1vixa1 d1fnoa4 d1ysja1 d1vhea2 d1z21a1  
d2fvga2 d1vgya1 d1r3na1 d2grea2 d1xmba1 g1q71.1 d1rtqa\_ d3rp2a\_  
g1lucy.1 d1fuja\_ d2zchp\_ d3w94a\_ d1si5h\_ d1lo6a\_ g2pka.1 d1cgha\_  
d1kigh\_ d1a5ia\_ d3s9ba\_ d1hj8a\_ d1ao5a\_ d2anya\_ d1q3xa1 d1gvza\_  
d1azza\_ d4gsoa\_ d2f91a1 d1iaua\_ d1gdna\_ d1eufa\_ g1fiw.1 d1eq9a\_  
d4nfea\_ d2rdla\_ d1spja\_ d1elva1 d1a7sa\_ d1ekbb\_ d1pfxc\_ d1yc0a\_  
d2aiqa\_ g1fiz.1 d1fi8a\_ d4k60a\_ d4dgja\_ d1mzaa\_ d1op0a\_ d3tjva\_  
d1pytd\_ d1sgfg\_ g1gg6.1 d2eeka\_ g1rtf.1 d1a0ja\_ d3g01a\_ d1pytc\_  
d4e7na\_ d1ddja\_ d1z8ga1 d2hlca\_ d1npga\_ g1jou.1 d1sgfa\_ d1autc\_  
g2hnt.1 g1kdq.1 d1orfa\_ d3s69a\_ d4crga\_ d1fxya\_ d1bqya\_ d2ftba\_  
d1pmpa\_ d2rcqa1 d1fdqa\_ d4lkpa\_ d1sa8a\_ d1vyfa\_ d1lpja\_ d3vg7a1  
d4azqa1 d1o8va\_ d5bvqa\_ d1p6pa\_ d2qo4a\_ d1opba\_ d1yiva1 d1o1va\_  
d4bvma1 d4tkba\_ d4i3ba\_ d1bwya\_ d1ggl\_ d4gkca\_ d1cbia\_ d3p6da1  
d1kqwa\_ d2a0aa1 d1dzka\_ d4tlja\_ d2a2ua\_ d4wfva\_ d3t1da\_ d4iixa\_  
d3zq3a\_ d2nnda\_ d1i4ua\_ d1kxo\_ d1bbpa\_ d1kt7a\_ d1exsa\_ d3s26a1  
d1l1f7a\_ d1qfta\_ d4gh7a\_ d1z24a1 d1qabe\_ d1xkia\_ d1lew3a\_ d3bx7a\_  
d4iawa1 d1n0sa\_ d1gkab\_ d3kzaa\_ d2k23a\_ d2l9ca1 d2joza1 d1gm6a\_

d3kffa\_ d3saoa1 d1e5pa\_ d1yupa1 d1iiua\_ d1e69a\_ d1mv5a\_ d3g60a4  
glii8.1 d1ewqa2 d1ji0a\_ d1qhla\_ d1v43a3 d2wmfa1 d1vpla\_ d1g2912  
d4a82a2 g1f2t.1 d2d62a1 d3tuic1 d2bbsa1 d3g60a3 d2ixea\_ d1g6ha\_  
d1sgwa1 d2qi9c\_ d3rlfa1 d3b60a1 d3d31a2 d2pzea1 g1xew.1 d1jj7a\_  
d1oxk2 d2onka1 d1wlwa\_ d1iwea\_ d1qf5a\_ d1vmaa2 d1nija1 d1np6a\_  
d2p67a1 d3ihla\_ d1okkd2 d1l1s1a2 d1s1ma2 d1liona\_ d2v40a\_ d3hida\_  
d2vola1 d2g0ta1 d1vcoa2 d1j8mf2 d1g3qa\_ d1xjca\_ d1p9ba\_ d1qzxa3  
d1ihua2 d1ihua1 d2qm8a\_ d1dj2a\_ d4ioja\_ d1cp2a\_ d1yrba2 d1hyqa\_  
d3gqba2 d1skye3 d1xp8a1 d1tf7a2 d1tf7a1 d1ye8a1 d1skyb3 d2qe7d2  
d4blta\_ d4huta\_ d3l1daa2 d4hyya\_ d2i3ba1 d1crla\_ d3j9tb2 d3ntua2  
d1vdza1 d2z43a\_ d1e9ra\_ d1nlfa\_ d3ziaa2 d1n0wa\_ d1g6oa\_ d3ziad2  
d3j9ta2 d1pzna2 d3gqbb2 d2i49a\_ d1nnfa\_ d1xvxa\_ d1ursa\_ d1h3da1  
d1iuda\_ d4m1va1 d1twya\_ d3e13x\_ d2nxoa1 d4pfua\_ d3ttma\_ d1elja\_  
d2qmw1a1 d1us5a\_ d1y3na1 d1jeta\_ d1uqwa\_ d4f19a1 d2esna2 d3thia\_  
d3fasa1 d2uyeb\_ d2xwva1 d1r9la\_ d2fyia1 d1pb7a\_ d2ozza1 d1sw5a\_  
d1nh8a1 d1vr5a1 d2g29a\_ d1xs5a\_ d3lswa\_ d2z23a\_ d3w9va\_ d3tcha\_  
d1q35a\_ d1z7me1 d3q27a\_ d1p99a\_ d1ve4a1 d2i6ea1 d4mcoa1 d4n8ya\_  
d1z3ma1 d1hsla\_ d1ixca2 d1j1na\_ d1xvya\_ d1y9ua\_ d2z22a1 d1xocal  
d4oera\_ d1wdna\_ d5f1qa1 d1xt8a1 d1i6aa\_ d4gwoa\_ d4igta1 d1pc3a\_  
d4mmpa1 d1o63a\_ d2czla1 d2onsa2 d4mija1 d4ok5a1 d2bmfa1 d2bmfa2  
d1yksa1 d1yksa2 d1jr6a\_ d2qeqa1 d2jlqa1 d1g8fa3 d1c4oa1 d2p6ra3  
d2p6ra4 d1oywa2 d1oywa3 d1wrba1 d1w36b2 d1w36b1 d1c4oa2 d3bora\_  
d1t6na\_ d2eyqa5 d2eyqa3 d2eyqa2 d2zu6a2 d1veca\_ d1uaaa1 d1w36d1  
d2g9na1 d1z3ix2 d2rb4a\_ d1hv8a1 d1hv8a2 d1t5ia\_ d1w36c2 d2j0sa2  
d2j0sa1 d1fuka\_ d3hjha1 d1z5za1 d1qdea\_ d1z63a1 d1s2ma2 d1s2ma1  
d1wp9a1 d1wp9a2 d1gm5a3 d1gm5a4 d3dina4 d3dina3 d1q0ua\_ d1w36c1  
d1z3ix1 d1nkta3 d1uaaa2 d1w36d2 g1qhh.1 d2fwra2 d2fwra1 d3q3ma\_  
d1za0a1 d1mxra\_ d2inca\_ d1jk0a\_ d2incb\_ d1mhyb\_ d3hf1b\_ d1mtyb\_  
d1r2fa\_ d2uw1a\_ d3n37a\_ d1afra\_ d1oquc\_ d1syya\_ d1mtyd\_ d2o1za\_  
d1uzra\_ d1smsa\_ d2fkza\_ d1zujal d1s3qa1 d2fjca1 d1z6om1 d1veia\_  
d4dyya\_ d1jiga\_ d3gvya\_ d2pyba\_ d4cy9a1 d3bvfa1 d1r03a\_ d2cf7a\_  
d1nf4a\_ d1zs3a1 d4iwka\_ d3ka8a\_ d3np0x\_ d1n1qa\_ d1lb3a\_ d4e6ka\_  
d1z6oa1 d2fzfa1 d4dyua\_ d3ge4a\_ d1jgca\_ d4am4a\_ d2z6ma\_ d1ji5a\_  
d1vlga\_ d1lkoal d1krqa\_ d3qz3a\_ d1o9ra\_ d2ffxj\_ d1euma\_ d1yv1a1  
d2v2pa\_ d1j30a\_ d4di0a\_ d1dpsa\_ d1oewa\_ d2qzxa\_ d2asia\_ d1psoe\_  
d1miqa\_ d1smra\_ d2h6ta\_ d1pfza\_ d1lizda\_ d3hd8a\_ d1j71a\_ d1dpja\_  
d4aa9a\_ d1t6ex\_ g1b5f.1 g1lya.1 g1htr.1 d1qdma2 d1wkra\_ d1tzsa\_  
d1libqa\_ d2qzwa\_ d1bdqa\_ d3ggta\_ d3ixoa\_ d1mrxa\_ d2haha\_ d1tw7a\_  
d4njsa\_ d1sgua\_ d2p3da\_ d1nsoa\_ d3d3ta\_ d2rkfa\_ d1c6ya\_ d3ogpa\_  
d3ekwa\_ d2o4na\_ d2j9ja\_ d1baia\_ d3ggua\_ d3lzua\_ d4npua\_ d4j55a\_  
d2r8na\_ d2fxda\_ d2p3ca\_ d4dqea\_ d3ttpa\_ d3t3ca\_ d2p3aa\_ d2hc0a\_  
d2fdda\_ d3mwsa\_ d1k8rb\_ d1wgra1 d1ef5a\_ d1wfyal d1e8ya3 d1wgyal  
d1l1fda\_ d2cs4a1 d1wxma1 d2byea1 d3kh0a1 d2byfa1 d1wxaa1 d1h4ra3  
d4y18a1 d2a16a3 d1wgda1 d1wggal d4q5eb\_ d1wjnal d1se9a\_ d3n3kb\_

d1wz0a1 d1we6a1 d2m0xa\_ d2gbka\_ d3rt3b1 d1wh3a1 d1sifa\_ d2ekec2  
d4ii2b1 d4hk2a1 d1c3ta\_ d1m94a\_ d1wgha1 d1ttna1 d1j8ca\_ d1wx8a1  
d3v6cb1 d2ma9b\_ d4i6lb1 d1bt0a\_ d2jvca1 d1iyfa\_ d2k1fa\_ d1wxva1  
d1wf9a1 d1t0ya\_ d2io0b2 d1x1ma1 d2gbma\_ d1zw7a1 d2m17a\_ d1ud7a\_  
d1we7a1 d2lwpa\_ d2gbja\_ d1wjua1 d1v6ea1 d1v86a1 d4eewa\_ d1wiaa1  
d4icva\_ d4gu2a\_ d1wx7a1 d1wy8a1 d4hjka1 d2faza1 d1v5oa1 d3ruib\_  
d1eo6a\_ d3waob\_ d2r2qa1 d3m95a\_ d3wana\_ d1yvca1 d1yeza1 d2h0ba\_  
d2erfa\_ d1h30a2 d3mw4a1 d1pz7a\_ d2r1ba\_ d3v64a1 d1d2sa\_ d3bopa1  
d3mw3a1 d1okqa1 d1okqa2 d2bcgg1 d2bcgg2 d1d5ta1 d1dszb\_ d1a6ya\_  
d3cbb\_ d1ynwa1 d1r4ia\_ d1hcqa\_ d2hana\_ d2hanb\_ d2enva1 d1kb4b\_  
d2nllb\_ d1l01a\_ d1cita\_ d1adqa1 d1fnga1 d1uvqb1 d1zs8a1 d2vola1  
d2vola2 d1mfb12 d2jelh2 d1uwel2 d3qq4b1 d1kjvb\_ d1k5na1 d1osph2  
d4odh12 d1ow0a1 d1ow0a2 d1bfob2 d3l9ra2 d3jtth1 d2fath2 d4elkb2  
d1fn4b2 d2xfxb\_ d1pg7x2 d1cqka\_ d4k71b2 d1lk2a1 d1eapb2 d4lfhg2  
d1i4fa1 d2nw2a2 d1kfah2 d1mhca1 d1h3ua1 d1wejh2 d1h0db2 d1a5fh2  
d1kcvh2 d1mjuh2 d1qqda1 d1kcrh2 d1k8ia1 d3huja2 d2nnab1 d1nfd2  
d3mffb2 d1s9va1 d1lk3h2 d1q0x12 d1fv1b1 d1neza1 d4rfeb2 d1r3ha1  
d1a6tb2 d1kjva1 d1pz5b2 d1onqa1 d2bc4a2 d1de4a1 d1k8da1 d1tcra2  
d1dn0b2 d1nfde2 d2xwtb2 d1bfoa2 d1mexh2 d1iakb1 d1ypzf2 d4f7ea2  
d1q72l2 d2fbjh2 d1fe8h2 d1clzh2 d1fngb1 d1uvqa1 d1vgka1 d1c16a1  
d4j12a2 d4x99b2 d1igtb3 d1je6a1 d1q72h2 d1nldh2 d1teth2 d2hmic2  
d1i1ca2 d1i1ca1 d1k8ib1 d1q0yh2 d1kfa12 d3frua1 d1pg7w2 d1u58a1  
d1igyb4 d1igyb3 d1hyrc1 d1klub1 d1deeb2 d1c12b2 d2bc4b2 d2ig2h2  
d1kcv12 d3wn5b1 d1lk2b\_ d1lk3l2 d1mjul2 d1sm3h2 d1q0xh2 d1zvsal  
d1ydpal d1u8ib2 d1ypze2 d1kcu2 d1mbma\_ d3su6a1 d1cula1 d4agka\_  
d1vcpa\_ d1q31a\_ g1n11.1 d3e90b\_ d1ep5a\_ d3u1jb\_ d2e3fa\_ d1mm0a\_  
d2e3ea\_ d2l1da\_ d2ny8x\_ d2e3ga\_ d2ny9x\_ d2nz3a\_ d2l1j7a\_ d1n4na\_  
d2m8bb1 d2kyqa\_ d3psma\_ d1jkza\_ d1jxca\_ d2g11a\_ d1ugla\_ d4uj0a\_  
d2k4ua\_ d1hp2a\_ d2lu9a\_ d1baha\_ d2meoa1 d1wm7a\_ d1hlya\_ d1n8ma\_  
d1wpda\_ d1c55a\_ d1pvza\_ d1wt7a\_ d1rjia\_ d1wz5a\_ d1m2sa\_ d1pjva\_  
d1c49a\_ d1qkya\_ d2ktca1 d1wmta\_ d1du9a\_ d1j5ja\_ d1rlga\_ d1t0za\_  
d2i61a\_ d1t1ta\_ d1sn4a\_ d1kv0a\_ d2lkba\_ d1npia\_ d1wwna\_ d1pe4a\_  
d2kbbka\_ d2li7a\_ d1djta\_ d2kbha\_ d1dq7a\_ d1sega\_ d1omya\_ d1zywa1  
d1jzaa\_ d1n9wa1 d1bbua1 d1e1oa1 d1c0aa1 d1b8aa1 d1l0wa1 d3a74a1  
d1ixra2 d1iyjb4 d1iyjb5 d1iyjb3 d1o7ia\_ d4ipca1 d1x3ea\_ d4apva\_  
d1jb7a1 d1jb7a2 d1jb7a3 d3kdfa\_ d1ue1b\_ d1wjja1 d3eiva\_ d1xjva2  
d1xjva1 d2ccza2 d1se8a\_ d1l1oc\_ d1jb7b\_ d1qvca\_ d3ulla\_ d1qzga\_  
d1miua4 d1miua5 d1miua3 d3g48a1 d1gd7a\_ d1mkha\_ d1jjcb3 d1pyba\_  
d3ubub\_ d1legia\_ d1qo3c\_ d1v7pa\_ d1tdqb\_ d3ubua\_ d1c3ab\_ d1h8ua\_  
d3bx4b\_ d1t8ca1 d1sb2a1 d1qdda\_ d2ziba1 d3cada\_ d1j34b\_ d1jwia\_  
d1jzna\_ d1c3aa\_ d1oz7b\_ d1wmza\_ d3bdwb\_ d1hq8a\_ d1fifa1 d1dv8a\_  
d3hupa\_ d1wk1a1 d1umra\_ d2afpa\_ d3bx4a\_ d1gz2a\_ d1sl6a\_ d1v7pb\_  
d3g8ka\_ d1ixxa\_ d1j34a\_ d1jwib\_ d1g1sa1 d1y17a1 d1ja3a\_ d1fvub\_  
d3bdwa\_ d1sb2b1 d1fvua\_ d1umrc\_ d1oz7a\_ d4m17a\_ d3cfwa1 d1ypqa1



d1g1ta1 d3fd4a\_ d3l9jc\_ d4dn8a1 d1v4lb\_ d1rdl1\_ d2msba\_ d1dgsa2  
d1fvial d1p16a1 d1x9na2 d1pfsa\_ d2aalka\_ d1je5a\_ d1rpma\_ d2shpa1  
d1yfoa\_ d1l8ka\_ d2ooqa1 d1g4us2 d1p15a\_ d1lara1 d1wcha\_ d2fh7a2  
d2fh7a1 d1ohea1 d1ohea2 d2f4da\_ d1rxda\_ d2hxpa\_ d1xria\_ d1fpza\_  
d3ezza\_ d4y2ea\_ d1i9sa\_ d1d4ua2 d3azya\_ d3wvja\_ d1upsa1 d1ajoa\_  
d2hyka\_ d1ajka\_ d2vy0a\_ d1o4ya\_ d3o5sa\_ d3d6ea\_ d3atga\_ d1dypa\_  
d1umza\_ d3i4ia\_ d1c1la\_ d4lbqa\_ d1a78a\_ d1slta\_ d4no4a\_ d3zsja\_  
d3duia\_ d1g86a\_ d1is3a\_ d1hlca\_ d1tdha3 d1q3ba3 d1ee8a3 d1k82a3  
g1qmo.1 g1len.1 d3zyra\_ d1fnya\_ d1n47a\_ g2ltn.1 d1avba\_ d3usua\_  
d1dhkb\_ d1f9ka\_ d1ukga\_ d1g8wa\_ d1g9fa\_ d1wbfa\_ d3wcsa\_ d1g7ya\_  
d1mvqa\_ d1hq1a\_ d1v6ia\_ d1dbna\_ d1qnwa\_ d1fx5a\_ d4l8qa\_ d1ioaa\_  
d3n35a\_ d3ubra\_ d1d4ca1 d2k3va\_ d1ft5a\_ d1qdba\_ d1m1qa\_ d2j7aa\_  
d1h21a\_ d1ogyb\_ d4fasa\_ d1jnia\_ d1oaha\_ d1sp3a\_ d3h33a\_ d1rwja\_  
d19hca\_ d1os6a\_ d3bxua\_ d3h4na\_ d1i77a\_ d3caoa\_ d2ctha\_ d1duwa\_  
d1ofwa\_ d2e84a\_ d1hh5a\_ d1gyoa\_ d3h34a\_ d1wioa4 d1ccza2 d1vcaa1  
d1dr9a2 d1ic1a1 d2d9qb1 d2nxyb2 d2dara2 d2dara1 d1wyha2 d2dloa2  
d1rutx4 d1rutx3 d2cuqa2 d1x41a2 d1x41a1 d1x3ha2 d1x3ha1 d2d8za1  
d1x61a2 d1x6aa1 d1x6aa2 d2cora2 d2cora1 d1v6ga1 d1v6ga2 d2d8za2  
d1x64a1 d1x64a2 d1b8ta1 d2co8a1 d1x63a2 d2dj7a2 d2dj7a1 d2cu8a2  
d2cu8a1 d1g47a2 d1g47a1 d1j2oa1 d1wyha1 d2dloa1 d1wiga1 d1wiga2  
d2cupa2 d2cupa3 d1x68a1 d2d8ya2 d2d8ya1 d1m3va2 d1x62a1 d1x68a2  
d1x61a1 d1b8ta3 d1b8ta2 d2d8xa2 d2d8xa1 d1x4ka1 d1x4ka2 d2cuqa1  
d2co8a2 d1j2oa2 d1x63a1 d2cura1 d2cura2 d1x62a2 d1op9a\_ d1y01a1  
d1letzb1 d1egj11 d2gsib1 d1nj9a1 d4jfh1 d1aqk11 d1t2ja\_ d1lo4h1  
d1zvya1 d3v4v11 d4enec1 d1kxtb\_ d5e8ea1 d2pxya\_ d4weud\_ d1xiwc\_  
d2esvd1 d1qznh\_ d1ogae1 d1f4xh1 d4n1hb\_ d3ezjb1 d3mlw11 d1kfah1  
d1letza1 d1b4jh1 d3cfic\_ d4w68a\_ d2arja1 d1ek3a\_ d2ok011 d1vera\_  
d1uwgh1 d1blnb1 d1fpth1 d1rzga1 d2giya1 d4m3kb1 d1nc2a1 d2nyyd1  
d1ncna\_ d1fbih1 d5dxwa\_ d4fqqa1 d1dqdh1 d1jfq11 d1kelh1 d1faih1  
d1frg11 d1fig11 d4m6n11 d1fo0a\_ d4hxb11 d3b5ga\_ d3quyd1 d2h9gb1  
d1i8kb\_ d2dd8h1 d2ck0h1 d1eaja\_ d4w6wb1 d2a6ib3 d1t66d1 d2e27h\_  
d1ob1b1 d1f11b1 d2v7na1 d1ad0a1 d2xt1b1 d1pskh1 d4i13b1 d2op411  
d1a0q11 d1uwe11 d1za3a1 d1ncb11 d4uu9a\_ d1bm3h1 d1cloh1 d1nqba2  
d1cf8h1 d4y5va\_ d1mhph1 d5anma1 d4cdgc1 d4ldeb\_ d1y01b1 d2pcpb1  
d1z3g11 d1dfb11 d1fh5h1 d3g5xa1 d1tzib1 d4dn311 d3zhka1 d2b1hh1  
d2uyla1 d1f3dh1 d1nj9b1 d2agjh1 d2h1pl1 d1q72h1 d8fabb1 d1ndmb1  
d1rjca1 d4u6hb1 d3upca\_ d2fbj11 d1osph1 d1tvda\_ d2cjvh\_ d4fhbd1  
d1bd2d1 d1rz7h1 d3nn8a\_ d1blna1 d1knoa1 d1nfda1 d2bmkb1 d1dq11\_  
d1igyb1 d1igf11 d12e8h1 d3utza1 d1nc2b1 d1rihh1 d4mwfb1 d4jvpa1  
d1mieh1 d1rhfa1 d1fgn11 d1sbsh1 d1lp9e1 d1dn0a1 d4lqf11 d1iaih1  
d1kgcd1 d1mh5b1 d1gpol1 d2g60h3 d1f8t11 d2jixd1 d4grwh\_ d1fo0b\_  
d1bfob1 d1axsa1 d1u9ka\_ d1nmbh\_ d1h8na1 d1h8na2 d1jguh1 d4eura1  
d3sdy11 d35c8h1 d1w7211 d1mvub\_ d1i9rh1 d1ob1a1 d4wenb\_ d1yeeh1  
d3ietc1 d1f58h1 d1ad0b1 d1mqkl\_ d1nbvh1 d4b50a\_ d3r8bb\_ d1baf11

d1mamh1 d4rgne1 d2gsgb\_ d35c8l1 d1bafh1 d1ailh1 d2pcpa1 d2fath1  
d2x1pa\_ dlorsb1 d1libgl1 d1shma\_ d1a2yb\_ d1u0qa\_ d2coqa\_ dlhilb1  
d1qfwi\_ d1jv5b\_ d1fn4b1 d5e0qa\_ d1nsh1 d1plgl1 d4ocxl1 d1kb5h1  
d1rzfh1 d1pg7x1 d2fx7h1 d2oi9c\_ d1l7il1 d3eyva1 d1d5il1 d4ffyl\_  
d1tetl1 d1a6wh\_ d1ac6a\_ d3dvfa\_ d1nfde1 d1mimh1 d1ri8a1 d1jhlh\_  
d3dura\_ d1fskb1 d1f97a1 d3so3b1 d2ak4d1 d1lp9f1 d4z7wf1 d1l7th1  
d4y5ya\_ d4x7ec1 d1emth1 d1likfl1 d1nlbh1 d4utal1 d1bjma1 d1eapb1  
d1u6ah1 d2dtgd1 d1kj2b\_ d1xeda1 d1cleh1 d1fgvh\_ d2bnub1 d2fb4h1  
d2dtgb1 d1ktrh\_ d1jpth1 d1qkz11 d4hepg\_ d2atpb1 d1flrh1 d2hrpl1  
d1mvfa\_ d1iaim1 d3k80a1 d2jb5h1 d3zkxc\_ d4grwe\_ d1it9h1 d1rhhb1  
d3w9ec\_ d1e4wh1 d1sy6h1 d2j6eh1 d3qxta\_ d1jglh1 d1p7ka1 d1tzhb1  
d4n8pa1 d1gaf11 d2jelh1 d1wioa2 d4i0cc1 d1cicb1 d1lmka2 d1lmka1  
d1iqwh1 d1orqb1 d1ejoh1 d1jnlh1 d4zga\_ d43c9b\_ d1ggbl1 d1wejh1  
d3q6fa1 d1f3dj1 d3c6la1 d1bqlh1 d3p9wb\_ d1a3r11 d1h0db1 d2uzil\_  
d1eo8l1 d1qfwl\_ d1n7ml1 d1igja1 d1c5ch1 d2a9mh\_ d1rmfh1 d1fj1b1  
d4heme\_ d1ccza1 d1a5fh1 d1logad1 d1dlfh\_ d1qa9b\_ d1vgel1 d3qskb\_  
d1sjxa\_ d4ozfg1 d1sq2n\_ d1qd0a\_ d1kcvh1 d1c5db1 d3qcul1 d3bn9d1  
d1mjuh1 d4y8dc\_ d7fabh1 d3dvgb1 d1l00l1 d1a6tb1 d1gigh1 d1kcrh1  
d2hwz11 d1yjdc1 d3clfl1 d4krna\_ d1d17l\_ d1e6ol1 d1mexh1 d3r0ma\_  
d4kkna\_ d1fnsl1 d1oaqh\_ d1rzia1 d1lucbh1 d1ncwl1 d4b41a\_ d1nfdfl  
d2mpah1 d2d7tl1 d4grwf\_ d4b5ea\_ d1lk3h1 d3u79a\_ d4u3xa\_ d1ghfl1  
d1bvkb\_ d1mcww1 d1b88a\_ d1jrhh1 d32c2b1 d4wemb\_ d1dsfh\_ d1op3h1  
d1ce1l1 d1iqda1 d1qoka1 d1qoka2 d1qfuh1 d2crya1 d1ay1h1 d1oaql\_  
d3ab0b\_ d1rur11 d1t4kb1 d1bz7b1 d1n0xh1 d1for11 d1lucbl1 d4w6yb\_  
d43c9a\_ d2aab11 d1tzia1 d4n1ca\_ d1k6qh1 d3g9ab\_ d4tvsa1 d1lghm\_  
d1pz5b1 d3dx9a1 d3wxwh\_ d1nakh1 d1kcul1 d3eaka\_ d4qlra1 d1cr9l1  
d1d9ka\_ d1f4x11 d1deea1 d2i27n2 d1c12a1 d2orb11 d1j8hd1 d1mcp11  
d1c5da1 d1kenh1 d1bd2e1 d1h5ba\_ d4x7fc1 d3upaa\_ d1t3fa1 d1indh1  
d2dtgc1 d4hc111 d1zv5a1 d4wgvb\_ d1uwgl1 d4f37k1 d1aqkh1 d1vesa\_  
d3zkqd\_ d1fpt11 d1l04l1 d1knob1 d3rrqa\_ d1ct8b1 d4orz\_ d1mlbb1  
d4hgkc1 d1dqdl1 d1bogb1 d4ozhe1 d1dr9a1 d1i7za1 d1dn0b1 d1kell1  
d1rzib1 d1ypzf1 d1wtla\_ d1hkfa\_ d1fail1 d1figh1 d2vyre\_ d1sjva\_  
d1ohqa\_ d1bfoa1 d1pkqb1 d1mjul1 d1b4j11 d1nsh1 d2arjb1 d1p4bh\_  
d4aj0a\_ d3nn8b\_ d2rcja1 d1f2xk\_ d4v1dd\_ d1adqh1 d2eksa\_ d4k3ga\_  
d1jfqh1 d1uweh1 d1frgh1 d4gftb\_ d1uz8b1 d4nlea\_ d1bm3l1 d1clol1  
d3mcka1 d2vq1a1 d1ae6h1 d4aq1b1 d1uj3b1 d1nbqa1 d1fh5l1 d2ck0l1  
d2ywza\_ d1q72l1 d4nbxb\_ d1hila1 d4hzb1 d2j88l1 d1zmya1 d1cd0a\_  
d1a4ka1 d1psk11 d1a0qh1 d4krmb\_ d1ncbh1 d2fbjh1 d1j8he1 d1i3ua\_  
d1cf8l1 d1fe8h1 d2p1ya1 d1eeqa\_ d2x89a\_ d1ol0a\_ d2r0lh1 d1ub5a1  
d1dfbh1 d3eyvb1 d4jdvb1 d4p2cg\_ d2gsia1 d2agj11 d1u3ha1 d2h1ph1  
d1rihl1 d1fskc1 d1boga1 d2a77l1 d1osp11 d1qfoa\_ d3dwta\_ d2fx7l1  
d1rz7l1 d3stba1 d1pkqa1 d1b6da1 d1dzba2 d1dzba1 d1kj2a\_ d4l1ha\_  
d1rzgb1 d1dq1h\_ d12e8l1 d1miel1 d1jmaa\_ d1sbs11 d1fgnh1 d1f58l1  
d1mqkh\_ d1ndgb1 d3qeg11 d1iaill d2aw2a1 d1tqbc1 d3fo2a1 d4dkaa\_

d1f8th1 d2g60l1 d2ywy\_ d1uj3a1 d1yc7a\_ d3bd3a\_ d4w6xb1 d1nmb1\_  
d1i8ka\_ d1rjlb1 d1ypze1 d1p7kb1 d1kxqe\_ d1gpoh1 d2z4qa1 d1w72h1  
d1i9rl1 d4qgya1 d4xt1c\_ d2qqnh1 d1cica1 d3c08h1 d2cd0a\_ d2bdnh1  
d1hnga1 d1mam11 d1nldh1 d1cr9h1 d4lcih1 d3bkyh1 d3qg7l1 d1ai1l1  
d1kxvc\_ d4iosd\_ d1l7ih1 d2x1qa\_ d1ub6b1 d3k74b\_ d1libgh1 d1teth1  
d1igy1 d1hxma1 d2x6ma\_ d2e7la\_ d5e03a\_ d1qfwm\_ d2r0kh1 d1igjb1  
d1rurh1 d1plgh1 d1mj8h1 d1yuhb1 d3fmg11 d1rzfl1 d1emt11 d1ad9b1  
d1igtb1 d1nlb11 d1d5ih1 d3k7ua\_ d4ffyh\_ d1bwwa\_ d3dvga1 d1a6ta1  
d1fgvl\_ d4qxgl1 d1mim11 d1jhl1\_ d2hffb1 d2hh0l1 d1qkzh1 d1l7t11  
d1afvh1 d1iaii1 d2cjuh\_ d1um5h1 d2ghwb2 d2ghwb1 d1kgce1 d2fgwh1  
d1ikfh1 d1dvfd\_ d2i24n1 d2xtjb\_ d1za3b1 d2yc1a\_ d2hh0h1 d2x1oa\_  
d1bvka\_ d1rjla1 d5e7ba1 d1igta1 d1il1b1 d2fb4l1 d1mvua\_ d1jpt11  
d32c2a1 d1fvca\_ d1iqdb1 d2hrph1 d2p4ab\_ d4qo1a\_ d1p2cb1 d1wt5c\_  
d1t4ka1 d5c1mb\_ d1it9l1 d1bz7a1 d1b2wh1 d1e4wl1 d1jnl11 d1yedb1  
d1za6b1 d3u7aa\_ d1igfh1 d3gnml1 d1orsa1 d1wejl1 d1a2ya\_ d1hxmb1  
d1gafh1 d2j4wh1 d1pz5a1 d1j05a\_ d1a3rh1 d4fq1l1 d1qfwh\_ d1eo8h1  
d1n7mh1 d4s1la\_ d1kegh1 d5da4a\_ d1iqwl1 d3whxb1 d1vgeh1 d1deeb1  
d1c12b1 d1t2ql1 d1ad9a1 d3gsnb1 d3b2uc1 d1ggbh1 d1t3fb1 d1nak11  
d4ocmc\_ d1lila1 d2v7hb3 d2esve1 d1mcoh1 d2qr0b1 d2q3aa\_ d1ct8a1  
d1kcr11 d2pxyb\_ d2uzih\_ d5c3ld\_ d3durb\_ d1c5c11 d2ak4e1 d1d17h\_  
d1xiwd\_ d1mlba1 d1rmfl1 d1i7zb1 d1dlfl\_ d2xa3a\_ d5bq7b1 d1dqqb1  
d3h42l1 d1egjh1 d1kcv11 d1fe8l1 d2j6e11 d1f3rb2 d1lk3l1 d1sm3h1  
d1q0xh1 d1ghfh1 d7fab11 d1igch1 d1l00h1 d4idla\_ d5c2b1\_ d1jrh11  
d1lilla1 d3zhda1 d4kfzc\_ d1b0wa\_ d1e6oh1 d1mex11 d4krpb\_ d1fnsh1  
d1ncwh1 d4hgma\_ d4eigb1 d4rzca\_ d2mpa11 d4y5xa\_ d5en2b1 d3lrga1  
d4ej1c1 d1rhha1 d1j05b\_ d1forh1 d1q9wb1 d2wzpd\_ d2aq2a1 d1h0da1  
d3revb1 d2ij0c1 d1tzha1 d4m7j11 d1k6ql1 d3b9kc1 d1igml\_ d3qeua1  
d1dsfl\_ d1ce1h1 d1kcu11 d1zvha1 d1zvoa1 d1tqbb1 d1ay1l1 d2qsc11  
d2cgrh1 d1nl0h1 d1ken11 d3eo0a1 d4n9ob1 d1n0xl1 d3k1kc\_ d1c4qa\_  
d1prtcl d2wv6d\_ d1prtfl\_ d1ltrd\_ d4l63b1 d1r4pb\_ d1t10f\_ d2bosa\_  
d1prtb1 d3chbd\_ d2aq2b1 d1ck1a1 d1lenfa1 d1v1oa1 d1et9a1 d1esfa1  
d2g9hd1 d4ohja1 d1klud1 d1bxta1 d1eu3a1 d1ty0a1 d1fnua1 d2cqva1  
d1fhga\_ d2k1ma\_ d2d12a1 d1biha3 d1biha1 d1biha4 d3qp3a1 d1g1ca\_  
d1gxea\_ d1cvsc2 d1cvsc1 d1xmwa2 d1m4ka2 d2otpa2 d1biha2 d1rhfa2  
d2fcba2 d2fcba1 d1wwbx\_ d1gsma2 d1lepfa1 d1lepfa2 d2dava1 d1waaa\_  
d1f97a2 d1x44a1 d1vcaa2 d1fnla2 d1fnla1 d3b5ha2 d3h8na2 d3h8na1  
d1jbj1 d1jbj2 d1pd6a\_ d1f2qa2 d1f2qa1 d3cx2a\_ d1nbqa2 d3b5ha1  
d1n26a1 d1xiwb\_ d1xaua\_ d1fltx\_ d2ifga1 d1olla1 d1olla2 d1cs6a4  
d1cs6a3 d1cs6a2 d1cs6a1 d2gw5a2 d1sy6a1 d1xiwa\_ d1lucta2 d1lucta1  
d1ry7b2 d1gl4b\_ d1qz1a3 d1olza1 d2c9aa1 d1wwca\_

**Family-53 (c.2.1.5)**

**Positive dataset contains 7 protein sequences.**

d2ewda3 d1up7a1 d2dfda1 d1s6ya1 d1ojsa3 d2a92a1 d1y6ja1

**Negative dataset contains 3755 protein sequences.**

d1m32a\_ d1libja\_ d1iuga\_ d4q75a\_ d2bkwa1 d1t3ia\_ d1n8pa\_ d1qz9a\_  
d1jf9a\_ d1leg5a\_ d1p3wa\_ d3kgwa\_ d1c11a\_ d2ctza1 d1vjoa\_ d2rfva\_  
d1gc0a\_ d1cs1a\_ d1d2fa\_ d2ch1a1 d1qgna\_ d1pffa\_ d1elua\_ d1u08a\_  
d11c5a\_ d1b5pa\_ d2ay1a\_ d1bw0a\_ d3pd6a\_ d7aata\_ d2csta\_ d1j32a\_  
d4wlha\_ d1o4sa\_ d1v2da\_ d1gdea\_ d1m6sa\_ d1v72a1 d1svva\_ d1ajsa\_  
d1wsta1 d2f8ja2 d11k9a\_ d1vp4a1 d1xi9a1 d2gb3a1 d1yaaa\_ d1xkla\_  
d2wfla\_ d3i2ka1 d11nsa3 d1xkta1 d2hfka\_ d1jmkc\_ d5d3ka\_ d1ohfc\_  
d1g8fa3 d3p0ya1 d1igra1 d1igra2 d1n8yc2 d1n8yc1 d1m6ba2 d1m6ba1  
d1f56a\_ d1bypa\_ d1lazca\_ d1ws8a\_ d3u25a\_ d1cuoa\_ d1id2a\_ d1rkra\_  
d2iaac\_ d4dp1x\_ d1nwpa\_ d2gima\_ d2i7sa\_ d1qhqa\_ d3ehbb1 d1fftb1  
d1gyca3 d1hfua2 d1kbva1 d1kbva2 d1sdda1 d1sdda2 d1gyca1 d1gyca2  
d1mzya1 d2bw4a1 d1aoza1 d1aoza3 d1aoza2 d1kyaa2 d1kyaa3 d1kyaa1  
d1mzya2 d4e9sa1 d1sddb1 d1sddb2 d1hfua1 d1hfua3 d1oela2 d1oela1  
d1v10a2 d1v10a3 d1v10a1 d2dara2 d2dara1 d1wyha2 d2dloa2 d1rutx4  
d1rutx3 d2cuqa2 d1x41a2 d1x41a1 d1x3ha2 d1x3ha1 d2d8za1 d1x61a2  
d1x6aa1 d1x6aa2 d2cora2 d2cora1 d1v6ga1 d1v6ga2 d2d8za2 d1x64a1  
d1x64a2 d1b8ta1 d2co8a1 d1x63a2 d2dj7a2 d2dj7a1 d2cu8a2 d2cu8a1  
d1g47a2 d1g47a1 d1j2oa1 d1wyha1 d2dloa1 d1wiga1 d1wiga2 d2cupa2  
d2cupa3 d1x68a1 d2d8ya2 d2d8ya1 d1x62a1 d1x68a2 d1x61a1 d1b8ta3  
d1b8ta2 d2d8xa2 d2d8xa1 d1x4ka1 d1x4ka2 d2cuqa1 d1m3va1 d2co8a2  
d1j2oa2 d1x63a1 d2cura1 d2cura2 d1x62a2 d2cfba1 d1dfoa\_ d1o69a\_  
d1bj4a\_ d3k28a\_ d2bwpa\_ d3lg0a\_ d2fnua\_ d3ou5a\_ d1z7da1 d1b9ha\_  
d4msoa\_ d1bs0a\_ d1s0aa\_ d1sffa\_ d3tqxa\_ d1mdoa\_ d3qboa\_ d3pgya\_  
d1bjna\_ d2dkja\_ d1ejia\_ d1vefa1 d4wxga\_ d3bs8a\_ d3gbxa1 d1w23a\_  
d2y5ia\_ d1qlsa\_ d1psra\_ d3n22a\_ d2egda\_ d4ggfc\_ d2wcea\_ d2luca\_  
d4aqia\_ d3nsia\_ d2lp3a\_ d1j55a\_ d1a4pa\_ d1k8ua\_ d1nsha\_ d3lgia\_  
d3i77a\_ d2z9ia2 d4nsva\_ d1lcya2 d4jcna\_ d1agja\_ d1os8a\_ d1hpga\_  
d1p3ca\_ d1l1ja\_ d1qtfa\_ d1a3qa1 d1iknc\_ d3brda1 d1p7hl1 d1oy3c\_  
d1imhc1 d1gjia1 d1zk9a1 d2cxka1 d2bema\_ d1pama1 d1lea9c1 d1qhoa1  
d2fhfa2 d2fhfa1 d1k3ia1 d1j0ha1 d1cxla1 d2bhua1 d1ledqa1 d1f1sa2  
d1ut9a2 d1txka1 d1mqta\_ d1d4m3\_ d1fmd3\_ d2mev1\_ g1aym.1 d1ev13\_  
d4q4w1\_ d1r1a3\_ d2x5ia\_ d1rhi1\_ g1r1a.1 g1d4m.1 g1rhi.1 d1b35b\_  
d1loopa\_ d1tme1\_ d4iv1a\_ g1pvc.1 g1fpn.1 d1fpn1\_ d4gb31\_ d1d4m1\_  
d1fmd1\_ d1ev11\_ d2wzr3\_ g1cov.1 d1qqp3\_ g1fmd.1 d2x5ic\_ d1rhi3\_  
g1oop.1 d1hxs1\_ g1hxs.1 d1fpn3\_ d1bev1\_ g2mev.1 d1eah3\_ d1aym1\_  
d1pvc3\_ d1zba3\_ d1h8ta\_ d3vbhc\_ g1b35.1 g1bev.1 d1hxs3\_ g1ev1.1  
d1bev3\_ g1tmf.1 d1tmf1\_ d1b35a\_ d2mev3\_ g1eah.1 g1h8t.1 d1eah1\_  
d4q4w3\_ d1r1a1\_ d1aym3\_ d1pvc1\_ d1zba1\_ d1h8tc\_ d1loopc\_ d1tme3\_  
g1qqp.1 d4iv1c\_ g1tme.1 d1nepa\_ d1ds6b\_ d1fstb\_ d1ex0a1 d1ku5a\_  
d1b67a\_ d2b5ea2 d2b5ea3 d2b5ea1 d2b5ea4 d2kp1a1 d2kp2a1 d1hyua3  
d1hyua4 d1j08a1 d1j08a2 d2bjca1 d2hsga1 d1qpza1 d1efaa1 d1e3oc2  
d1ic8a2 d2ovga\_ d1sq8a\_ d1rzsa\_ d3kz3a\_ d3gpdg2 d2q49a2 d1hdgo2  
d2g17a2 d2cvoa2 d2czca1 d3pwka2 d1obfo2 d1i32a2 d1zyao2 d2pkqo2  
d1b7go2 d2hjsa2 d1cf2o2 d1vkna2 d1nvm2 d2m9wa1 d3dfxa\_ d2msya\_

d2djoa1 d2r5za\_ d1au7a1 d1f43a\_ d2lmda1 d1akhb\_ d1s7ea1 d3nara\_  
d1zq3p1 d2craa1 d1mija\_ d4uuta\_ d3a01a\_ d1x58a1 d3rkqa1 d3cmya1  
d2cqxa1 d2da6a1 d1e3oc1 d1fj1a\_ d1mh3a1 d1ig7a\_ d1x41a1 d1wh7a1  
d1gt0c1 d2mw8a\_ d1lfup\_ d1x2ma1 d1b72a\_ d1wi3a1 d1jgga\_ d1wjha1  
d1x2na1 d1mnmc\_ d2cuea1 d3k2aa\_ d2hosa\_ d2jwta2 d1pufa\_ d1oact1  
d2hi3a\_ d1b8ia\_ d4j19a\_ d3lnqa\_ d1wh5a1 d1b8ib\_ d1fexa\_ d2cqra1  
d1guua\_ d1ug2a1 d2cqqa1 d2ajea1 d4a69c\_ d1h8ac1 d2crga1 d2iw5b1  
d1xc5a1 d1ofcx1 d2cu7a1 d1wgxa1 d2cjja1 d2ckxa1 d1gvda\_ d1hcra\_  
d1tc3c\_ d1u78a2 d1xg1a1 d1itya\_ d1b10a1 d1d5ya1 d1d5ya2 d1prt1b2  
d3lv8a\_ d1s3ga1 d1zaka1 d1s4qa\_ d3tvta2 d1uf9a\_ d1khta\_ d1ckea\_  
d1osna\_ d1p5zb\_ d4tmka\_ d3cm0a\_ d1jaga\_ d3h86a\_ d1t0hb\_ d1nn5a\_  
d2h92a\_ d3kb2a1 d2c95a1 d1yj5a2 d1kgda\_ d1ly1a\_ d2ak3a1 d1vyva2  
d1deka\_ d2grja1 d1p3ja1 d1y63a\_ d1e4ya1 d1s96a\_ d3iija1 d1lvga\_  
d1nksa\_ d1vyua2 d4e22a\_ d1qf9a\_ d1jjva\_ d1q3ta\_ d1ki9a\_ d1lw7a2  
d1teva\_ d1kjwa2 d1gsia\_ d1m7ga\_ d1x6va3 d1g3ma\_ d1j99a\_ d1t8ta1  
d1nsta\_ d1fmja\_ d1zrha\_ d1ls6a\_ d2a3ra\_ d1aqua\_ d2zptx\_ d3ckla\_  
d1texas\_ d1q44a\_ d2gwha\_ d1uj2a\_ d4gi7a\_ d2jeoa1 d1rz3a\_ d1z0ja1  
d3umra2 d3gj0a1 d2gaoa1 d1yzga1 d1x3sa1 d1g7sa4 d1puja\_ d1udxa2  
d1kk1a3 d2o52a\_ d1jwyb\_ d1zcaa2 d1zcba2 d2fv8a1 d2cjwa\_ d3dz8a1  
d1xzpa2 d1vg8a\_ d4qxaa\_ d2ew1a1 d1x1ra1 d2bcgy\_ d3doea1 d3cona\_  
d3rega\_ d3wyga\_ d1upta\_ d2b6ha1 d1zd9a1 d1lnza2 d1r5ba3 d1n0ua2  
d1r2qa\_ d2f91a1 d2rhda\_ d3q3jb\_ d3q85a\_ d1efma1 d1r8qa\_ d2gf9a1  
d2akab1 d1ek0a\_ d1z08a1 d2gcoa1 d2dy1a2 d4g01b\_ d2cxa1 d1svia\_  
d3q72a\_ d1ni3a1 d4ac9a4 d2erxa1 d2bmea\_ d1wxqa1 d2gf0a1 d4ldja1  
d1zunb3 d1d5ca\_ d4lv5b\_ d1efca3 d1kmqa\_ d2g6ba1 d3lrpa\_ d1tada2  
d2y8ea\_ d4rd4a1 d1z06a1 d2heia\_ d3a58b\_ d1u01a2 d1d2ea3 d1zj6a1  
d2ocba\_ d3rwoa\_ d1mr3f\_ d2e9sa1 d4u5xa1 d2iwra\_ d2fn4a1 d3bwdd\_  
d2nzja1 d2atva1 d2ksqa\_ d3l43a\_ d1mkya2 d1mkya1 d1wmsa\_ d1jnja3  
d2rmka\_ d1f6ba\_ d1f60a3 d1gota2 d1jala1 d2fh5b1 d1g16a\_ d2wblc\_  
d1m7ba\_ d1wf3a1 d1f5na2 d1t9ha2 d1z6xa1 d1z0aa1 d2fg5a1 d2a5ja1  
d2bcjq2 d1ky3a\_ d4y0va\_ d4lhwa\_ d2qmea1 d2atxa1 d1legaa1 d1ryha\_  
d1moza\_ d1nrjb\_ d2erya1 d3bfka\_ d1puia\_ d1fzqa\_ d3j3az1 d3t5ga\_  
d1shza2 d3defa\_ d2f7sa1 d3raba\_ d3tsoa\_ d3aq4a\_ d2a17a1 d3sfva1  
d3bc1a\_ d1sdma\_ d3h4sa1 d2heha\_ d2grya\_ g3kin.1 d1kk8a2 d1br2a2  
d1goja\_ d1f9va\_ d2mysa2 d1lkxa\_ d3t0qa\_ d4db1a1 d3gbja\_ d1ry6a\_  
d1v8ka\_ d1vava\_ d1luaia\_ d1y4wa1 d3vrda1 d3vrda2 d1fc2c d1fc2c1  
d1h1oa1 d1m70a2 d1m70a1 d1hroa\_ d4gedb\_ d3zooa\_ d1mz4a\_ d1gu2a\_  
d1f1fa\_ d1dvva\_ d1c6ra\_ d1c75a\_ d1e29a\_ d1gdva\_ d1cnoa\_ d1h32b\_  
d1co6a\_ d2bh4x\_ d2aiua\_ d5cytr\_ d1jdl\_ d1i8oa\_ d2zboa\_ d3dmia\_  
d1ls9a\_ d1wvec\_ d2yk3a\_ d3ph2b\_ d1dw0a\_ d5aura\_ d1ql3a\_ d1qn2a\_  
d1f1ca\_ d2nqya\_ d1h4ga\_ d1oa2a\_ d1olra\_ d3b7ma\_ d4h7ma1 d3wp3a\_  
d2vgda\_ d1ligoa\_ d3zsea\_ d2nlra\_ d3wx5a\_ d1oa3a\_ d1pvxa\_ d1m4wa\_  
d1f5ja\_ d1oa4a\_ d1ks5a\_ d4ix1a1 d3sita1 d2ah2a1 d1evsa\_ d1cnt1\_  
d1pvhb\_ d1z7ca\_ d1huwa\_ d1bgea\_ d1rhga\_ d1f6fa\_ d1f45b\_ d1l1rb\_

d1axia\_ dletea\_ d3tgxb\_ d2z3qa1 d3qb1a\_ d1hula\_ d1m48a\_ d4nkqb\_  
dleera\_ d1v7mv\_ d5e4ea\_ d2o27a\_ d3b5ka\_ d2psma1 d4zf7a\_ d3uf5a\_  
d4x51a\_ d1d9ca\_ d4ypgc1 d3oq3a\_ d1lqsl\_ d1n1fa\_ d1aula\_ d1wu3i\_  
d3bes1\_ d3ux9a\_ d2b71a\_ d3rbaa\_ d2qtra\_ d3192a\_ d1f9aa\_ d1qjca\_  
d2h29a\_ d1vlha\_ d1od6a\_ d1lw7a1 d1mrza2 d4ruka\_ d2e17a\_ d1iq0a2  
d1irxa2 d1r6ta2 d1ivsa4 d2cyba\_ d1rqga2 d1j09a2 d2yxna\_ d1f7ua2  
d1h3fa1 d1ffya3 d2g36a1 d1nzja\_ d1jila\_ d1n3la\_ d1i6la\_ d1pfva2  
d1h3na3 d3n9ia\_ d3sz3a1 d2bk7a\_ d3fjua\_ d1z5ra1 d1kwma1 d1uwya2  
d1jqga1 d2c1ca1 d1dtda\_ d1h81a2 d3sw2a\_ d1moxc\_ d1dx5i3 d1edmb\_  
d1aut12 d1aut11 d1nqlb\_ d1dva11 d1szba2 d1kigl\_ d2y5fl\_ d1ijqa2  
d1gk5a\_ d1g1sa2 d1nt0a3 d1xdtr\_ d1lmja2 d1lmja1 d1nzia2 d2wphe\_  
d1klil\_ d1pfx12 d1pfx11 d1p9ja\_ d1g1ta2 d1f7ea\_ d4yzub\_ d2mgpa1  
d1b9wa2 d2mgpa2 d1ob1c1 d1ob1c2 d1n1ia2 d1n1ia1 d2npra2 d2npra1  
d1qx2a\_ d1ig5a\_ d1s5ja2 d1qhta2 d4dlea2 d1tgoa2 d3py8a2 d1q8ia2  
d1kfsa2 d2py5a2 d1d5aa2 d1exra\_ d1tiza1 d1nyaa\_ d1g8ia\_ d1ggwa\_  
d1wdcc\_ d3fwba\_ d1ggza\_ d2o5ga\_ d1ctaa\_ d1m45a\_ d3i5gc\_ d1sl8a\_  
d1fpwa\_ d2scpa\_ d2roaa\_ d4aqra\_ d3pn7b\_ d1br1b\_ d2mysb\_ d1s6ca\_  
d1bjfa\_ d2obha\_ d1jfk\_ d1jfk0a\_ d1qv0a\_ d1lkja\_ d2mlfc\_ d2m97a\_  
d2d8na\_ d4by5a\_ d1jbaa\_ d4nqga\_ d1wdcb\_ d2mysc\_ d1j7qa\_ d1s6ia\_  
d1uhka2 d1r2ua\_ d1dtla\_ d3kf9a\_ d3pn7c\_ d1fi6a\_ d1c07a\_ d5d67d\_  
d1tuza\_ d1h8ba\_ d1leg3a1 d2zkmx1 d1snla\_ d1gjya\_ d1y1xa\_ d1hqva\_  
d1dvia\_ d1df0a1 d1qxp2 d4usla\_ d1k94a\_ d1jfxa\_ d1wkya2 d1uuqa\_  
d3wh9a\_ d4m1ra\_ d1xyza\_ d4xuya\_ d2je8a5 d4bf7a1 d3cuia\_ d1ur4a\_  
d1qw9a2 d1odza\_ d2vzsa5 d1bqca\_ d2x2ya1 d1hjqa\_ d1qnra\_ d4y7ea1  
d1vjza\_ d4k68a\_ d2v3ga\_ d4hpga\_ d1nofa2 d1nq6a\_ d1h4pa\_ d1aq0a\_  
d3ziza\_ d4bs0a\_ d1ecea\_ d1h1na\_ d1ta3b\_ d1w91a2 d1ilwa\_ d1uhva2  
d1us3a2 d1egza\_ d7a3ha\_ d1tvna1 d3nyda1 d1ghsa\_ d2cyga1 d4xv0a\_  
d2c8na2 d1w32a\_ d3emca\_ d1v6ya1 d1foba\_ d2uwfa1 d2fgla\_ d3niya1  
d2c0ha1 d1rh9a1 d1yq2a5 d1szna2 d1fa2a\_ d1pama4 d5do8a1 d1ea9c3  
d1hx0a2 d2fhfa5 d1qhoa4 d1avaa2 d1m53a2 d4m8ua1 d2gjpa2 d1lwha2  
d4howa1 d1ktba2 d1j0ha3 d3vm5a1 d2x1ia\_ d1wzaa2 d1uasa2 d2diea1  
d1mxga2 d1ht6a2 d1eswa\_ d1iv8a2 d5cpsa\_ d1ud2a2 d1zjaa1 d3gbea1  
d1kwga2 d1wdpa\_ d1gcya2 d1g5aa2 d1hvxa2 d3dhp2 d2bhua3 d4do4a1  
d3qgva1 d1e43a2 d1g94a2 d2d3na2 d1gjwa2 d1gvia3 d1x1na1 d1r7aa2  
d1tz7a1 d3ljqa\_ g1k2x.1 d4toqa\_ d1wb0a1 d1w9pa1 d1eoka\_ d1itxa1  
d1kfw1 d1goia2 d1ledqa2 d2gsja\_ d1hjxa1 d1jnda1 d1vf8a1 d3wdpp1  
d3wq5a\_ d1gnxa\_ d4gxpa\_ d4hz8a\_ d3aiua\_ d1wcga1 d1qvba\_ d3ahxa\_  
d1v02a\_ d2dgaa\_ d1pbga\_ d1vffa1 d1qoxa\_ d4ha4a\_ d1bvsa3 d2w0pa\_  
d2diaa1 d2e9ia2 d2e9ja1 d2dj4a1 d2eeba1 d2diba1 d2dmba1 d2dmca1  
d2d7oa1 d2ee6a1 d2d7pa1 d2eeaa1 d2di8a1 d1wlha1 d2d7na1 d2nqca\_  
d2d7ma1 d2dica1 d3cnka\_ d2k3ta1 d2eeca1 d1qfha1 d1qfha2 d2bp3a1  
d1v05a\_ d2ee9a1 d2eeda1 d2di9a1 d3syxa1 d1mkea1 d2p8va\_ d1xoda1  
d1i7aa\_ d1evha\_ d1qc6a\_ d1legxa\_ d1wgqa1 d1v89a1 d2coda1 d1zc3b\_  
d1wg7a1 d1u5ea1 d1v61a1 d2coca1 d2ys1a1 d1v5pa1 d1ntya2 d1wjma1

d1wila1 d1u29a\_ d1xx0a1 d1lunqa\_ d2zkmx3 d1fhoa\_ d1v88a1 d2adza1  
d1x1fa1 d1p6sa\_ d2coaa1 d1btka\_ d1v5ma1 d1faoa\_ d2x18a\_ d1dyna\_  
d1x1ga1 d4kaxb\_ d2j59m1 d1ki1b2 d1xcga2 d1txda2 d1u5da1 d1dbha2  
d1wlha\_ d1upqa\_ d1v5ua1 d1foea2 d2fjla1 d2dfka2 d2cofa1 d1kz7a2  
d1h6ua1 d1etob\_ d1umqa\_ d1r55a1 d3gboa\_ d1atla\_ d1buda\_ d4q1la\_  
d1quaa\_ d1yp1a\_ d1wnia\_ d4c5pa\_ d2bsza1 d4bgfa\_ d1w4ta1 d1t3ca\_  
d1epwa3 d2a97a\_ d3fiea\_ d3ioqa\_ d1fh0a\_ d1o0ea\_ d1khqa\_ d1m6da\_  
d2cb5a\_ d1cs8a\_ g8pch.1 d1s4va\_ d2pnsa\_ d1vsna1 d1iwda\_ d2oula\_  
d7pcka\_ d3bwka\_ d3bcna\_ d2p86a\_ d1pvja\_ d1pcia\_ d1gece\_ d1deua\_  
d4bs6a\_ d1xkga1 d1cqda\_ d1jqpa2 d2c0ya\_ d2bdza\_ d3p5ua\_ d2o36a\_  
d1k9xa\_ d1zoya1 d1qo8a2 d1d4ca2 d1chua2 d1jnra2 d1kf6a2 d2jk6a2  
d2jk6a1 d1feca1 d1feca2 d1lpfa1 d1lpfa2 d1xhca1 d1xhca2 d1dx1a2  
d1dx1a1 d1gera2 d1m6ia2 d1onfa1 d1onfa2 d3lada2 d3lada1 d1w4xa1  
d1w4xa2 d1gesa2 d1mo9a1 d1xdia1 d1f12a2 d1f12a1 d1fcda1 d1fcda2  
d1h6va2 d1h6va1 d1mo9a2 d1gv4a2 d1gv4a1 d2gv8a2 d2gv8a1 d1aoga1  
d1aoga2 d1hyua1 d1ebda1 d1ebda2 d3dk9a1 d1q1ra2 d1q1ra1 d1zbfa1  
d2z1ha\_ d2etja1 d3qioa1 d1j11a\_ d2e41a\_ d1j12a\_ d21sna1 d1io2a\_  
d1uaxa\_ d2yv0x\_ d1mu2a1 d1lekea\_ d1i39a\_ d1pn0a1 d1reoal d1ju2a1  
d2f5va1 d3c96a1 d2gmha1 d1pj5a2 d1gpea1 d1o5wa1 d1n4wa1 d1k0ia1  
d2dw4a2 d2ivda1 d1seza1 d2voua1 d1kdga1 d1s5ja1 d2hbja2 d2igia\_  
d1wlja\_ d1qhta1 d4dlea1 d1tgoa1 d2f96a1 d3tr8a1 d3mxma\_ d1q8ia1  
d1y97a1 d1w0ha\_ d1kfsa1 d2py5a1 d1d5aa1 d1yt3a3 d2guia\_ d3mwpa1  
d4kb1a\_ d2v76a\_ d1wj1a1 d1aqca\_ d1qqga2 d1ntva\_ d1n3ha\_ d4dbba\_  
d3f0wa1 d1p3ra\_ d1wgua1 d2cy4a1 d3hqca\_ d1wvha1 d1xr0b1 d1kb0a1  
d3nvva1 d1krha3 d2h88b1 d1n62a2 d1t3qa2 d1zoyb1 d1jq4a\_ d1ffva2  
d1dgja2 d1rm6c2 d1k8ka1 d3uleb1 d3i33a2 d3i33a1 d1bupa1 d1dkgd2  
d1dkgd1 d4ci6a2 d1jcfal d4a2ba2 d2fxua1 d1yaga2 d1yaga1 d4cbua2  
d1bupa2 d1r7ha\_ d1faaa\_ d1wika1 d1xfla\_ d1ttza1 d2f51a1 d1ti3a\_  
d1nhoa\_ d1sena\_ d2i4aa\_ d1ep7a\_ d1zmaa1 d1fo5a\_ d31efa1 d3diea1  
d2yana1 d1z6na1 d1oaza\_ d3zywa1 d4aj8a\_ d1nm3a1 d4fiwa\_ d1wmja\_  
d4hs1a1 d1liloa\_ d1xwaa1 d1wjka1 d2vmla\_ d1fb6a\_ d1gh2a\_ d1h75a\_  
d1nw2a\_ d1kx5b\_ d3a6na\_ d4m6ba2 d2nqbd\_ d3wkjd\_ d2yfwe\_ d4h9na\_  
d5bnxa\_ d1kx5c\_ d3r45a\_ d1eqzb\_ d4jjnb\_ d1f66c\_ d1eqza\_ d4wnnb\_  
d1kx5a\_ d1u35c1 d1id3a\_ d2nqbc\_ d1kx5d\_ d3us3a3 d3us3a1 d1tafa\_  
d1bh9b\_ d1jfiba\_ d1q9ca\_ d1h3ob\_ d2byka1 d1n1ja\_ d4g92b\_ d1bh9a\_  
d1jfia\_ d1h3oa\_ d2bykb1 d1n1jb\_ d1pd212 d1nhya2 d2a2ra2 d1k0dd2  
d1f2ea2 d1gsua2 d1f3ba2 d2fhea2 d2pvqa1 d1tw9a2 d1oyja2 d1e6ba2  
d1k0ma2 d3ik7a1 d4is0a1 d1r5aa2 d1j1va2 d1m0ua2 d3gtub2 d1z9ha2  
d1okta2 d1axda2 d2gsra2 d1tu7a2 d1k3ya2 d1zgma1 d1b48a2 d1gnwa2  
d1gwca2 d2gsta2 d1glqa2 d1oe8a2 d1pn9a2 d1v2aa2 d1fw1a2 d1duga2  
d2trcp\_ g1f8v.1 d1novc\_ d2bbvc\_ d1qusa\_ d1qqya\_ d1gd6a\_ d1f6ra\_  
d1livma\_ d2gv0a\_ d1iiza\_ d2z2fa\_ d1j8xa\_ d1ghla\_ d1b9oa\_ d1741a\_  
d1691a\_ d2o4wa\_ d1p37a\_ d1k28a3 d1xjta1 d1jtma\_ d2f2qa\_ d4e97a1  
d1iyka2 d1iyka1 d1rxta1 d1iica1 d2pjsa1 d1klla\_ d2i7ra1 d1eicsa\_

d1xqaa1 d5cj3a1 d1npba\_ d2p7oa\_ d1r9ca\_ d1nkia\_ d4iuaa3 d4bvva\_  
d5hpga\_ d3k65a\_ d1ki0a3 d1ki0a2 d1ki0a1 d1a0ha1 d1pmla\_ d3sp8a3  
d2feba1 d1qsta\_ d2beia1 d4m3sa\_ d1u6ma1 d1ygha\_ d1yk3a1 d3dr6a\_  
d1xmta\_ d1z4ea1 d2ge3a1 d1bo4a\_ d2fiaa1 d2jdca1 d1y9wa1 d3to7a\_  
d1wwza1 d2fl4a1 d2ozua1 d2b5ga\_ d2cy2a1 d2p0wa\_ d1cm0a\_ d4pswa\_  
d1yrea1 d1yr0a1 d1m4ia\_ d2gana1 d1yvka1 d1ghea\_ d2g3aa1 d1y7ra1  
d2euia1 d1q2ya\_ d2fsra1 d1xeba\_ d2ae6a1 d1cjwa\_ d1qsm\_ d2aj6a1  
d1y9ka1 d1i12a\_ d1vkca\_ d2atra1 d2d4pa1 d2fiwa1 d2fe7a1 d1tiqa1  
d2ou2a\_ d1yx0a1 d2fcka1 d1p0ha\_ d2j8ma\_ d2pq8a\_ d1z4ra1 d1s3za1  
d1ufha\_ d2hqya1 d2hqya2 d1lrza2 d1ne9a1 d1lrza3 d2qked\_ d4ksoa\_  
d1t4za1 d1wwja\_ d2m5ta\_ d1cqqa\_ d1wqsa\_ d5bpea\_ d2ipha\_ d1lvoa\_  
d2bhga1 d3tnta\_ d3sjia\_ d3d23a1 d2fyqa\_ d3tloa\_ d3zvea1 d2hrva\_  
d3q3ya1 d4asha1 d1e88a1 d1l6ja5 d1l6ja4 d1eaka4 d1eaka3 d1l6ja3  
d1h8pa1 d1ys1x\_ d4hs9a\_ d1ispa\_ d1ku0a\_ d3qmma\_ d1mixa2 d1e5wa2  
d1isna2 d2a16b2 d3rp2a\_ g1ucy.1 d1fuja\_ d2zchp\_ d3w94a\_ d1si5h\_  
d1l06a\_ g2pka.1 d1cgha\_ d1kigh\_ d1a5ia\_ d3s9ba\_ d1hj8a\_ d1ao5a\_  
d2anya\_ d1q3xa1 d1gvza\_ d1azza\_ d4gsoa\_ d2f91a1 d1iaua\_ d1gdna\_  
d1eufa\_ g1fiw.1 d1eq9a\_ d4nfea\_ d2rdla\_ d1spja\_ d1elva1 d1a7sa\_  
d1ekbb\_ d1pfxc\_ d1yc0a\_ d2aiqa\_ g1fiz.1 d1fi8a\_ d4k60a\_ d4dgja\_  
d1mzaa\_ d1op0a\_ d3tjva\_ d1pytd\_ d1sgfg\_ g1gg6.1 d2eeka\_ g1rtf.1  
d1a0ja\_ d3g01a\_ d1pytc\_ d4e7na\_ d1ddja\_ d1z8ga1 d2hlca\_ d1npma\_  
d1brup\_ g1jou.1 d1sgfa\_ d1autc\_ g2hnt.1 g1kdq.1 d1orfa\_ d3s69a\_  
d4crga\_ d1fxya\_ d1lgya\_ d4l3wa\_ d1llfa\_ d1gz7a\_ d1lukca\_ d1jlja\_  
d2rhwa\_ d1ra6a\_ d1muka\_ d3gsza\_ d1te9a\_ d2xwha\_ d3uqsa\_ d3hkwa\_  
d3n6ma\_ d2cjqa\_ d2xyma\_ d1teba\_ d1te8a\_ d1s48a\_ d1u09a1 d4wfxa\_  
d3tyqa\_ d2pgga1 d1xwdc1 d3kj4a\_ d1w8aa\_ d2ifga3 d1p9ag\_ d1xkua\_  
d4qmea2 d2xdta2 d1z5ha2 d1dzka\_ d4tlja\_ d2a2ua\_ d4wfv\_ d3tlda\_  
d4iaxa\_ d3zq3a\_ d2nnda\_ d1i4ua\_ d1kxoa\_ d1bbpa\_ d1kt7a\_ d1exsa\_  
d3s26a1 d1lf7a\_ d1qfta\_ d4gh7a\_ d1z24a1 d1qabe\_ d1xkia\_ d1ew3a\_  
d3bx7a\_ d4iawa1 d1n0sa\_ d1gkab\_ d3kzaa\_ d2k23a\_ d2l9ca1 d2joza1  
d1gm6a\_ d3kffa\_ d3saoa1 d1e5pa\_ d1yupa1 d1iiua\_ d1h6ua2 d2tbvc\_  
d1c8nc\_ d1x36a\_ d1smvc\_ d1ng0c\_ d4sbvc\_ d1lopa\_ d1f2nc\_ d1cixa\_  
d1y29a\_ d1v7fa\_ d2jtba\_ d1d1ha\_ d1g9pa\_ d1lupa\_ d1qk7a\_ d1mb6a\_  
d2a2va\_ d1niya\_ d1i25a\_ d1hvwa\_ d2mpqa\_ d1ie6a\_ d1kqha\_ d1la4a\_  
d2mxoa1 d1koza\_ d1qk6a\_ d1emxa\_ d1lqra\_ d1c6wa\_ d1rmka\_ d1ixta\_  
d1eyoa\_ d1cnna\_ d1fu3a\_ d1g1pa\_ d1f3ka\_ d1fyga\_ d1rypd\_ d1irua\_  
d1rypc\_ d3unfk\_ d1rypa\_ d1j2pa\_ d1irui\_ d1j2qh\_ d3unfh\_ d1m4ya\_  
d1rypb\_ d1irul\_ d1irug\_ d1iru2\_ d1q5rh\_ d1rypg\_ d1g3ka\_ d1iruf\_  
d1q5qa\_ d1e94a\_ d1irub\_ d1ryph\_ d3ty6a\_ d1iruj\_ d1iruk\_ d1rype\_  
d1irud\_ d1irue\_ d3mi01\_ d1rypf\_ d1iruh\_ d2z3ba\_ d1iruc\_ d3mka2\_  
d1irul\_ d1ny721 d1a6ca3 d1a6ca2 d1a6ca1 d1pgl22 d1pgl21 d1pgl11  
d1ny711 d1jgta2 d1ofda3 d1ea0a3 d1q15a2 d1ct9a2 d1ao0a2 d1te5a\_  
d3ubub\_ d1legia\_ d1v7pa\_ d1tdqb\_ d3ubua\_ d1c3ab\_ d1h8ua\_ d3bx4b\_  
d1t8ca1 d1sb2a1 d1qdda\_ d2ziba1 d3cada\_ d1byfa\_ d1j34b\_ d1jwia\_



d1jzna\_ d1c3aa\_ d1oz7b\_ d1wmza\_ d3bdwb\_ d1hq8a\_ d1fifa1 d1dv8a\_  
d3hupa\_ d1wk1a1 d1umra\_ d2afpa\_ d3bx4a\_ d1gz2a\_ d1sl6a\_ d1v7pb\_  
d3g8ka\_ d1ixxa\_ d1j34a\_ d1jwib\_ d1g1sa1 d1y17a1 d1ja3a\_ d1fvub\_  
d3bdwa\_ d1sb2b1 d1fvua\_ d1umrc\_ d1oz7a\_ d4m17a\_ d3cfwa1 d1ypqa1  
d1g1ta1 d3fd4a\_ d3l9jc\_ d4dn8a1 d1v41b\_ d1rd1l\_ d2msba\_ d1eixa\_  
d3exra\_ d2ffca1 d2fdsa1 d3n3ma1 d2czda\_ d1q6oa\_ d2yyua\_ d1vqta1  
d1dbta\_ d3ldva1 d1ux8a\_ d1dlya\_ d4i0va\_ d2bkma\_ d1dlwa\_ d2bmma\_  
d2r80b\_ d1cqxa1 d1cg5a\_ d1gcvb\_ d3boma\_ d2h8fb\_ d2raoa\_ d3bj1a\_  
d4hrrb\_ d2r50a\_ d3d1kb\_ d2aa1b1 d3zhwa\_ d3hf4b\_ d3gdja\_ d1jebb\_  
d3bj1b\_ d1x9fb\_ d1wmub\_ d1gcva\_ d3bcqb\_ d3d4xb\_ d1gvha1 d2dc3a\_  
d3hf4a\_ d4yu3a\_ d3k8ba\_ d1qpwb\_ d2r80a\_ d3bcqa\_ d1v4wa\_ d3wtgb\_  
d1j17a\_ d4esaa\_ d1a9we\_ d3d1ab\_ d1fsla\_ d4h21a\_ d1v4wb\_ d1mwca\_  
d1vhba\_ d1jeba\_ d1spgb\_ d1h97a\_ d1q1fa\_ d1tu9a1 d3d1aa\_ d1hdsb\_  
d3hyub\_ d2zfb\_ d3fs4a\_ d1shrb\_ d4h21b\_ d4yu3b\_ d1spga\_ d3hrwa\_  
d3qqra\_ d3at5a\_ d4wchd\_ d3hyua\_ d1cg5b\_ d1uc3a\_ d1hbra\_ d2raob\_  
d1outb\_ d4esab\_ d3gdjb\_ d3qqqa\_ d1x9fc\_ d3vrfa\_ d1litha\_ d3mkba\_  
d3d4xa\_ d3mjpa\_ d1j16a\_ d3fh9a\_ d1outa\_ d2dc3b\_ d1lit2a\_ d3eoka\_  
d3g46a\_ d1qpwa\_ d3vrfb\_ d1ch4a\_ d1x9fd\_ d1hdsa\_ d2zfb\_ d3mkbb\_  
d1or4a\_ d3wtga\_ d1a4fa\_ d3fh9b\_ d3bomb\_ d3cy5a\_ d3at5b\_ d1x9fa\_  
d2oifa\_ d4lmxb\_ d1cpcb\_ d3v57a\_ d1kn1a\_ d1cpca\_ d4f0ta\_ d2vjha\_  
d4po5b\_ d1alla\_ d4f0tb\_ d1b33b\_ d1b8db\_ d4h0mb\_ d1b33a\_ d2vjhb\_  
d41m6b\_ d2vmlb\_ d1a11b\_ d2vjta\_ d3dbja\_ d2vmla\_ d2vjtb\_ d4f0ub\_  
d1f99b\_ d4rmpa1 d1liaa\_ d1eyxb\_ d2uulb\_ d4lmsb\_ d4f0ua\_ d2bv8a\_  
d1f99a\_ d2bv8b\_ d2c71b\_ d3dbjb\_ d4rmpb1 d1b8da\_ d4h0ma\_ d3v57b\_  
d1kn1b\_ d1liab\_ d2uula\_ d2j96a\_ d1pfsa\_ d2a1ka\_ d1je5a\_ g1wht.1  
d2xqfa\_ d1ea5a\_ d1f6wa\_ d1dx4a\_ d1k4ya\_ d4qwwa\_ d2ha2a\_ d2qvba\_  
d2v9za\_ d4kafa1 d1b9ra\_ d1offa\_ d1frra\_ d3wcqa\_ d1l5pa\_ d1wria\_  
d1i7ha\_ d3av8a\_ d1czpa\_ d1rfka\_ d3p1ma1 d3b2ga\_ d2bt6a2 d1pv8a\_  
d1w5qa\_ d2c1ha\_ d1ohla\_ d1l6sa\_ d1dosa\_ d1gvfa\_ d3qm3a1 d2fjka\_  
d1f74a\_ d3l21a\_ d2e1da\_ d1to3a1 d1w3ia\_ d1sfla\_ d1n7ka\_ d1vcva1  
d4imea\_ d1wa3a\_ d2ocza1 d1f2ja\_ d3m16a\_ d2yxga\_ d1ub3a\_ d3a5fa\_  
d1fbaa\_ d1l6wa\_ d1xfba1 d1wx0a1 d1vpxa1 d1ojxa\_ d1mxsa\_ d2a4aa1  
d1xkya1 d3cq0a1 d3s1xa\_ d1f05a\_ d1fdja\_ d3cpra1 d4d2ja\_ d1cg2a1  
d1yloa2 d1y7ea2 d1y0ya3 d1lfwa1 d1vixa1 d1fnoa4 d1vhua2 d1ysja1  
d1vhea2 d1z21a1 d2fvga2 d1vgya1 d2grea2 d1xmba1 g1q71.1 d1rtqa\_  
d2ftba\_ d1pmpa\_ d2rcqa1 d1fdqa\_ d4lkpa\_ d1sa8a\_ d1vyfa\_ d1lpja\_  
d3vg7a1 d4azqa1 d1o8va\_ d5bvqa\_ d1p6pa\_ d2qo4a\_ d1opba\_ d1yiva1  
d1o1va\_ d4bvma1 d4tkba\_ d4i3ba\_ d1bwya\_ d1ftpa\_ d4gkca\_ d1cbia\_  
d3p6da1 d1kqwa\_ d2a0aa1 d1jx4a2 d3gv5b1 d1t94a2 d3bq0a2 d1e69a\_  
d1mv5a\_ d3g60a4 g1ii8.1 d1ewqa2 d1ji0a\_ d1qhla\_ d1v43a3 d2wmfa1  
d1vpla\_ d1g2912 d4a82a2 g1f2t.1 d2d62a1 d3tuic1 d2bbsa1 d3g60a3  
d2ixea\_ d1g6ha\_ d1sgwa1 d2qi9c\_ d3rlfa1 d3b60a1 d3d31a2 d2pzea1  
g1xew.1 d1jj7a\_ d1oxxk2 d2onka1 d1wlwa\_ d1iwea\_ d1qf5a\_ d1vmaa2  
d1nija1 d1np6a\_ d2p67a1 d3ihla\_ d1okkd2 d1ls1a2 d1s1ma2 d1liona\_

d2v40a\_ d3hida\_ d2vo1a1 d2g0ta1 d1vcoa2 d1j8mf2 d1g3qa\_ d1xjca\_  
d1p9ba\_ d1qzxa3 d1ihua2 d1ihua1 d2qm8a\_ d1dj2a\_ d4ioja\_ d1cp2a\_  
d1yrba2 d1hyqa\_ d3gqba2 d1skye3 d1xp8a1 d1tf7a2 d1tf7a1 d1ye8a1  
d1skyb3 d2qe7d2 d4blta\_ d4huta\_ d3l1daa2 d4hyya\_ d2i3ba1 d1cr1a\_  
d3j9tb2 d3ntua2 d1vdza1 d2z43a\_ d1e9ra\_ d1nlfa\_ d3ziaa2 d1n0wa\_  
d1g6oa\_ d3ziad2 d3j9ta2 d1pzna2 d3gqbb2 d2i49a\_ d1nnfa\_ d1xvxa\_  
d1ursa\_ d1h3da1 d1iuda\_ d4m1va1 d1twya\_ d3e13x\_ d2nxoa1 d4pfua\_  
d3ttma\_ d1elja\_ d2qmw1a1 d1us5a\_ d1y3na1 d1jeta\_ d1uqwa\_ d4f19a1  
d2esna2 d3thia\_ d3fasa1 d2uyeb\_ d2xwva1 d1r91a\_ d2fyia1 d1pb7a\_  
d2ozza1 d1sw5a\_ d1nh8a1 d1vr5a1 d2g29a\_ d1xs5a\_ d3lswa\_ d2z23a\_  
d3w9va\_ d3tcha\_ d1q35a\_ d1z7me1 d3q27a\_ d1p99a\_ d1ve4a1 d2i6ea1  
d4mcoa1 d4n8ya\_ d1eu8a\_ d1zbma1 d1hsla\_ d1ixca2 d1j1na\_ d1xvya\_  
d1y9ua\_ d2z22a1 d1xoca1 d4oera\_ d1wdna\_ d5f1qa1 d1xt8a1 d1i6aa\_  
d4gwoa\_ d4igta1 d1pc3a\_ d4mmpa1 d1o63a\_ d2cz1a1 d2onsa2 d4mija1  
d4ok5a1 d2bmfa1 d2bmfa2 d1yksa1 d1yksa2 d2qeqa1 d2j1qa1 d1a1va2  
d1eh3a\_ d3skpa\_ d1dtza1 d1dtza2 d1ieja\_ d1jnfa2 d1ce2a1 d1jnf1a1  
d1b1xa2 d1b1xa1 d1jw1a1 d1ryoa\_ d1h76a1 d1h76a2 d1c4oa1 d2p6ra3  
d2p6ra4 d1oywa2 d1oywa3 d1wrba1 d1w36b2 d1w36b1 d1c4oa2 d3bora\_  
d1t6na\_ d2eyqa5 d2eyqa3 d2eyqa2 d2zu6a2 d1veca\_ d1uaaa1 d1w36d1  
d2g9na1 d1z3ix2 d2rb4a\_ d1hv8a1 d1hv8a2 d1t5ia\_ d1w36c2 d2j0sa2  
d2j0sa1 d1fuka\_ d3hjha1 d1z5za1 d1qdea\_ d1z63a1 d1s2ma2 d1s2ma1  
d1wp9a1 d1wp9a2 d1gm5a3 d1gm5a4 d3dina4 d3dina3 d1q0ua\_ d1w36c1  
d1z3ix1 d1nkta3 d1uaaa2 d1w36d2 g1qhh.1 d2fwra2 d2fwra1 d2v8ta\_  
d3q3ma\_ d1za0a1 d1mxra\_ d2inca\_ d1jk0a\_ d2incb\_ d3hf1b\_ d1mtyb\_  
d1r2fa\_ d2uw1a\_ d1mhyd\_ d3n37a\_ d1afra\_ d1oquc\_ d1syya\_ d1mtyd\_  
d2olza\_ d1uzra\_ d1smsa\_ d2fkza\_ d1zuja1 d1s3qa1 d2fjca1 d1z6om1  
d1veia\_ d4dyya\_ d1jiga\_ d3gvya\_ d2pyba\_ d4cy9a1 d3bvfa1 d1r03a\_  
d2cf7a\_ d1nf4a\_ d1zs3a1 d4iwka\_ d3ka8a\_ d3np0x\_ d1n1qa\_ d1lb3a\_  
d4e6ka\_ d1z6oa1 d2fzfa1 d4dyua\_ d3ge4a\_ d1jgca\_ d4am4a\_ d2z6ma\_  
d1ji5a\_ d1vlga\_ d1lkoa1 d3qz3a\_ d1o9ra\_ d2ffxj\_ d1euma\_ d1yv1a1  
d2v2pa\_ d1j30a\_ d4di0a\_ d1dpsa\_ d1oewa\_ d2qzxa\_ d2asia\_ d1psoe\_  
d1smra\_ d2h6ta\_ d1pfza\_ d1izda\_ d3hd8a\_ d1j71a\_ d1dpja\_ d4aa9a\_  
d1t6ex\_ g1b5f.1 g1lya.1 g1htr.1 d1qdma2 d1bxoa\_ d1wkra\_ d1tzsa\_  
d1libqa\_ d2qzwa\_ d1bdqa\_ d3ggta\_ d3ixoa\_ d1mrxa\_ d2haha\_ d1tw7a\_  
d4njsa\_ d1sgua\_ d2p3da\_ d1nsoa\_ d3d3ta\_ d2rkfa\_ d1c6ya\_ d2rspa\_  
d3ogpa\_ d3ekwa\_ d2o4na\_ d2j9ja\_ d1baia\_ d3ggua\_ d3lzua\_ d4npua\_  
d4j55a\_ d2r8na\_ d2fxda\_ d2p3ca\_ d4dqea\_ d3ttpa\_ d3t3ca\_ d2p3aa\_  
d2hc0a\_ d2fdda\_ d3mwsa\_ d1k8rb\_ d1wgra1 d1ef5a\_ d1wfy1a1 d1wgya1  
d1l1fda\_ d2cs4a1 d1wxma1 d2byea1 d3kh0a1 d2byfa1 d1wxaa1 d1e7ua3  
d1h4ra3 d4yl8a1 d2a16a3 d1wgda1 d1wgga1 d4q5eb\_ d1wjna1 d1se9a\_  
d3n3kb\_ d1wz0a1 d1we6a1 d2m0xa\_ d2gbka\_ d3rt3b1 d1wh3a1 d1sifa\_  
d2ekec2 d4ii2b1 d4hk2a1 d1c3ta\_ d1wgha1 d1ttna1 d1j8ca\_ d1wx8a1  
d3v6cb1 d2ma9b\_ d4i61b1 d1bt0a\_ d2jvca1 d1iyfa\_ d2k1fa\_ d1wxva1  
d1wf9a1 d1t0ya\_ d2io0b2 d1x1ma1 d2gbma\_ d1zw7a1 d2m17a\_ d1ud7a\_

d1we7a1 d2lwp\_ d2gbja\_ d1wjua1 d1v6ea1 d1v86a1 d4eewa\_ d1wiaa1  
d4icva\_ d4gu2a\_ d1wx7a1 d1wy8a1 d4hjka1 d2faza1 d1v5oa1 d3ruib\_  
d1eo6a\_ d3waob\_ d2r2qa1 d3m95a\_ d3wana\_ d1yvca1 d1yeza1 d4lu0a\_  
d1of8a\_ d3unda1 d3e9aa1 d1vr6a2 d1n8fa\_ d2qkfa\_ d1d9ea\_ d2h0ba\_  
d2erfa\_ d1h30a2 d1h30a1 d3mw4a1 d2r1ba\_ d3v64a1 d1d2sa\_ d3bopa1  
d3mw3a1 d1okqa1 d1okqa2 d2bcgg1 d2bcgg2 d1wioa4 d1ccza2 d1vcaa1  
d1ic1a1 d2d9qb1 d2nxyb2 d1um8a\_ d1ixza\_ d1qvra2 d1qvra3 d1qzma\_  
d1sxjc2 d1jr3d2 d2p65a\_ d1l8qa2 d1g8pa\_ d3hu3a3 d1sxjd2 d1njfa\_  
d1in4a2 d1sxja2 d1tuea1 d2ce7a2 d1w5sa2 d1sxjb2 d1d2na\_ d1ny5a2  
d1ofha\_ d2gnoa2 d2a5yb3 d1fnna2 d1u0ja1 d1lv7a\_ d1iqpa2 d2fnaa2  
d1ixsb2 d4gita\_ d1sxje2 d1g41a\_ d1mbma\_ d3su6a1 d1cu1a1 d4agka\_  
d1vcpa\_ d1q31a\_ g1n11.1 d3e90b\_ d1ep5a\_ d3u1jb\_ d2e3fa\_ d1mm0a\_  
d2e3ea\_ d2l1da\_ d2ny8x\_ d2e3ga\_ d2ny9x\_ d2nz3a\_ d3ia2a\_ d1a88a\_  
d4dgqa1 d1hkha\_ d1zoia\_ d2k4ua\_ d1hp2a\_ d2lu9a\_ d1baha\_ d2meoa1  
d1wm7a\_ d1hlya\_ d1n8ma\_ d1jlza\_ d1wpda\_ d1c55a\_ d1pvza\_ d1wt7a\_  
d1rjia\_ d1wz5a\_ d1m2sa\_ d1pjva\_ d1c49a\_ d1qkya\_ d2ktca1 d1wmta\_  
d1du9a\_ d1j5ja\_ d1rlga\_ d1t0za\_ d2i61a\_ d1t1ta\_ d1sn4a\_ d1kv0a\_  
d2lkba\_ d1npia\_ d1wwna\_ d1pe4a\_ d2kbka\_ d2li7a\_ d1djta\_ d2kbha\_  
d1dq7a\_ d1sega\_ d1omya\_ d1zywa1 d1jzaa\_ d1n9wa1 d1bbua1 d1c0aa1  
d1b8aa1 d1l0wa1 d3a74a1 d1eova1 d1t61c1 d1iyjb4 d1iyjb5 d1iyjb3  
d1o7ia\_ d4ipca1 d1x3ea\_ d4apva\_ d1jb7a1 d1jb7a2 d1jb7a3 d3kdfa\_  
d1ue1b\_ d1wjja1 d3eiva\_ d1xjva2 d1xjva1 d2ccza2 d1se8a\_ d1l1loc\_  
d1jb7b\_ d1qvca\_ d1qzga\_ d1miua4 d1miua5 d1miua3 d3g48a1 d1gd7a\_  
d1mkha\_ d1pyba\_ d1y14b1 d2nn6i1 d1i941\_ d2zjra2 d1smxa\_ d2qamc2  
d1hh2p1 d2r7da1 d1rl2a2 d1wfqa1 d3bzka4 d1x6oa2 d3a0ja\_ d2j01d2  
d2ja9a1 d4q15a\_ d1hr0w\_ d1luza\_ d2n3sa\_ d2vnud1 d1h95a\_ d1go3e1  
d2nn6h1 d2mo1a\_ d1iz6a2 d1jjga\_ d1e3pa2 d2ix0a3 d2ix0a2 d2lxja\_  
d1ueba3 d1ueba2 d2z0sa1 d1u0la1 d2ix0a1 d2eifa2 d2je6i1 d3i2za1  
d2c35b1 d2ahob2 d1t9ha1 d3i4oa\_ d2qall1 d1jt8a\_ d2nn6g1 d1g6pa\_  
d3cama\_ d1i94q\_ d1c9oa\_ d1d7qa\_ d2ba0a1 d2vnud2 d2vnud3 d1khia2  
d2qalq1 d1wi5a1 d1xtda2 d1ny4a\_ d1dgsa2 d1fvia1 d1ckma1 d1p16a1  
d1x9na2 d3zxha\_ d1cgla\_ d1rm8a\_ d1eaka2 d1hy7a\_ d2jsda\_ d1cxva\_  
d1hv5a\_ d1i76a\_ d3azya\_ d3wvja\_ d1upsa1 d1ajoa\_ d2hyka\_ d1ajka\_  
d2vy0a\_ d1o4ya\_ d3o5sa\_ d3d6ea\_ d3atga\_ d1dypa\_ d1lumza\_ d3i4ia\_  
d1c11a\_ d4lbqa\_ d1slta\_ d4no4a\_ d3zsja\_ d3duia\_ d1g86a\_ d1is3a\_  
d1qmja\_ d1hlca\_ d1tdha3 d1q3ba3 d1k82a3 g1qmo.1 g1len.1 d3zyra\_  
d1fnya\_ d1n47a\_ g21tn.1 d1avba\_ d3usua\_ d1dhkb\_ d1f9ka\_ d1lukga\_  
d1g8wa\_ d1g9fa\_ d1wbfa\_ d3wcsa\_ d1g7ya\_ g1loe.1 d1mvqa\_ d1hq1a\_  
d1v6ia\_ d1dbna\_ d1qnwa\_ d1fx5a\_ d4l8qa\_ d1ioaa\_ d3n35a\_ d3ubra\_  
d1qo8a1 d1d4ca1 d2k3va\_ d1ft5a\_ d1qdba\_ d1mlqa\_ d2j7aa\_ d1h21a\_  
d1ogyb\_ d4fasa\_ d1jnia\_ d1sp3a\_ d3h33a\_ d1rwja\_ d19hca\_ d1os6a\_  
d3bxua\_ d3h4na\_ d1i77a\_ d3caoa\_ d2ctha\_ d1duwa\_ d1ofwa\_ d2e84a\_  
d1hh5a\_ d1gyoa\_ d3h34a\_ d1a6ya\_ d3cbba\_ d1ynwa1 d1r4ia\_ d1hcqa\_  
d2hana\_ d2hanb\_ d2enva1 d1kb4b\_ d2n11b\_ d1lola\_ d1cita\_ d1adqa1

d1fnga1 d1uvqbl d1zs8a1 d2vola1 d2vola2 d1mfb12 d2jelh2 d1uwel2  
d3qq4b1 d1kjbv\_ d1k5na1 d1osph2 d4odhl2 d1low0a1 d1low0a2 d1bfob2  
d3l9ra2 d3jtth1 d2fath2 d4elkb2 d1fn4b2 d2xfxb\_ d1pg7x2 d1cqka\_  
d4k71b2 d1lk2a1 d1eapb2 d4lfhg2 d1i4fa1 d2nw2a2 d1kfah2 d1mhca1  
d1h3ua1 d1wejh2 d1h0db2 d1a5fh2 d1kcvh2 d1mjuh2 d1qqda1 d1kcrh2  
d1k8ia1 d3huja2 d2nnab1 d1nfd2 d3mffb2 d1s9va1 d1lk3h2 d1q0xl2  
d1fv1b1 d1neza1 d4rfeb2 d1r3ha1 d1a6tb2 d1kjva1 d1pz5b2 d1longa1  
d2bc4a2 d1de4a1 d1k8da1 d1tcra2 d1dn0b2 d1nfde2 d2xwtb2 d1bfoa2  
d1mexh2 d1iakb1 d1ypzf2 d4f7ea2 d1q72l2 d2fbjh2 d1fe8h2 d1clzh2  
d1fngb1 d1uvqa1 d1vgka1 d1c16a1 d4j12a2 d4x99b2 d1igtb3 d1je6a1  
d1q72h2 d1nldh2 d1teth2 d2hmic2 d1i1ca2 d1i1ca1 d1k8ib1 d1q0yh2  
d1kfa12 d3frua1 d1pg7w2 d1u58a1 d1igyb4 d1igyb3 d1hyrc1 d1klub1  
d1deeb2 d1c12b2 d2bc4b2 d2ig2h2 d1kcvl2 d3wn5b1 d1lk2b\_ d1lk3l2  
d1mjul2 d1sm3h2 d1q0xh2 d1zvsa1 d1ydpa1 d1u8ib2 d1ypze2 d1kcuh2  
d1op9a\_ d1y0la1 d1etzb1 d1egj11 d2gsib1 d1nj9a1 d4jfh1 d1aqk11  
d1t2ja\_ d1lo4h1 d1zvy1 d3v4v11 d4enec1 d1kxtb\_ d5e8ea1 d2pxya\_  
d4weud\_ d1xiwc\_ d2esvd1 d1qznh\_ d1logae1 d1f4xh1 d4n1hb\_ d3ezjb1  
d3mlw11 d1kfah1 d1letza1 d1b4jh1 d3cfic\_ d4w68a\_ d2arja1 d1ek3a\_  
d2ok0l1 d1vera\_ d1uwgh1 d1blnb1 d1fpth1 d1rzga1 d2giya1 d4m3kb1  
d1nc2a1 d2nyyd1 d1ncna\_ d1fbih1 d5dxwa\_ d4fqqa1 d1dqdh1 d1jfq11  
d1kelh1 d1faih1 d1frgl1 d1figl1 d4m6n11 d1fo0a\_ d4hxb11 d3b5ga\_  
d3quyd1 d2h9gb1 d1i8kb\_ d2dd8h1 d2ck0h1 d1eaja\_ d4w6wb1 d2a6ib3  
d1t66d1 d2e27h\_ d1ob1b1 d1f11b1 d2v7na1 d1ad0a1 d2xt1b1 d1pskh1  
d4i13b1 d2op4l1 d1a0q11 d1uwel1 d1za3a1 d1ncb11 d4uu9a\_ d1bm3h1  
d1cloh1 d1nqba2 d1cf8h1 d4y5va\_ d1mhph1 d5anma1 d4cdgc1 d4ldeb\_  
d1y0lb1 d2pcpb1 d1z3gl1 d1dfb11 d1fh5h1 d3g5xa1 d1tzib1 d4dn3l1  
d3zhka1 d2b1hh1 d2uyl1 d1f3dh1 d1nj9b1 d2agjh1 d2h1p11 d1q72h1  
d8fabbb1 d1ndmb1 d1rjca1 d4u6hb1 d3upca\_ d2fbj11 d1osph1 d1tvda\_  
d2cjh\_ d4fhbd1 d1bd2d1 d1rz7h1 d3nn8a\_ d1blna1 d1knoa1 d1nfda1  
d2bmkbb1 d1dq11\_ d1igyb1 d1igf11 d12e8h1 d3utza1 d1nc2b1 d1rihh1  
d4mwfb1 d4jvpa1 d1mieh1 d1rhfa1 d1fgn11 d1sbsh1 d1lp9e1 d1dn0a1  
d4lqf11 d1iaih1 d1kgcd1 d1mh5b1 d1gp011 d2g60h3 d1f8t11 d2jixd1  
d4grwh\_ d1fo0b\_ d1bfob1 d1axsa1 d1u9ka\_ d1nmbh\_ d1h8na1 d1h8na2  
d1jguh1 d4eura1 d3sdy11 d35c8h1 d1w7211 d1mvub\_ d1i9rh1 d1ob1a1  
d4wenb\_ d1yeeh1 d3ietc1 d1f58h1 d1ad0b1 d1mqk1\_ d1nbvh1 d4b50a\_  
d3r8bb\_ d1baf11 d1mamh1 d4rgne1 d2gsgb\_ d35c8l1 d1bafh1 d1aih1  
d2pcpa1 d2fath1 d2x1pa\_ d1orsb1 d1ibgl1 d1shma\_ d1a2yb\_ d1u0qa\_  
d2coqa\_ d1hilb1 d1qfwi\_ d1jv5b\_ d1fn4b1 d5e0qa\_ d1nsnh1 d1plgl1  
d4ocx11 d1kb5h1 d1rzfh1 d1pg7x1 d2fx7h1 d2oi9c\_ d1l7il1 d3eyva1  
d1d5il1 d4ffyl\_ d1a6wh\_ d1ac6a\_ d3dvfa\_ d1nfde1 d1mimh1 d1ri8a1  
d1jhlh\_ d3dura\_ d1fskb1 d1f97a1 d3so3b1 d2ak4d1 d1lp9f1 d4z7wf1  
d1l7th1 d4y5ya\_ d4x7ec1 d1emth1 d1ikf11 d1nlbh1 d4utal1 d1bjma1  
d1eapb1 d1u6ah1 d2dtgd1 d1kj2b\_ d1xeda1 d1cleh1 d1fgvh\_ d2bnub1  
d2fb4h1 d2dtgb1 d1ktrh\_ d1jpth1 d1qkz11 d4hepg\_ d2atpb1 d1flrh1

d2hrpl1 d1mvfa\_ d1iaim1 d3k80a1 d2jb5h1 d3zkxc\_ d4grwe\_ d1it9h1  
d1rhhb1 d3w9ec\_ d1e4wh1 d1sy6h1 d2j6eh1 d3qxta\_ d1jglh1 d1p7ka1  
d1tzhb1 d4n8pa1 d1gaf11 d2jelh1 d1wioa2 d4i0cc1 d1cicb1 d1lmka2  
d1lmka1 d1liqwh1 d1lorqb1 d1ejoh1 d1jnlh1 d4zg1a\_ d43c9b\_ d1ggbl1  
d1wejh1 d3q6fa1 d1f3dj1 d3c6la1 d1bqlh1 d3p9wb\_ d1a3r11 d1h0db1  
d2uzil\_ d1eo8l1 d1qfwl\_ d1n7ml1 d1igja1 d1c5ch1 d2a9mh\_ d1rmfh1  
d1fj1b1 d4heme\_ d1ccza1 d1a5fh1 d1ogad1 d1dlfh\_ d1qa9b\_ d1vgel1  
d3qskb\_ d1sjxa\_ d4ozfg1 d1sq2n\_ d1qd0a\_ d1kcvh1 d1c5db1 d3qcul1  
d8faba1 d3bn9d1 d1mjuh1 d4y8dc\_ d7fabh1 d3dvgb1 d1lo011 d1a6tb1  
d1gigh1 d1kcrh1 d2hwz11 d1yjdc1 d3clfl1 d4krna\_ d1dl7l\_ d1e6ol1  
d1mexh1 d3r0ma\_ d4kkna\_ d1fnsl1 d1oaqh\_ d1rzia1 d1lucbh1 d1ncwl1  
d4b41a\_ d1nfdfl d2mpah1 d2d7t11 d4grwf\_ d4b5ea\_ d1lk3h1 d3u79a\_  
d4u3xa\_ d1ghfl1 d1bvkb\_ d1mcww1 d1b88a\_ d1jrhh1 d32c2b1 d4wemb\_  
d1dsfh\_ d1op3h1 d1ce111 d1liqda1 d1qoka1 d1qoka2 d1qfuh1 d2crya1  
d1ay1h1 d1oaql\_ d3ab0b\_ d1rur11 d1t4kb1 d1bz7b1 d1n0xh1 d1for11  
d1lucbl1 d4w6yb\_ d43c9a\_ d2aab11 d1tzia1 d4n1ca\_ d1k6qh1 d3g9ab\_  
d4tvsa1 d1ligmh\_ d1pz5b1 d3dx9a1 d3wxwh\_ d1nakh1 d1kcul1 d3eaka\_  
d4qlra1 d1cr9l1 d1d9ka\_ d1f4xl1 d1deea1 d2i27n2 d1c12a1 d2orbl1  
d1j8hd1 d1mcph1 d1c5da1 d1kenh1 d1bd2e1 d1h5ba\_ d4x7fc1 d3upaa\_  
d1t3fa1 d1indh1 d2dtgc1 d4hc111 d1zv5a1 d4wgvb\_ d1luwgl1 d4f37k1  
d1aqkh1 d1vesa\_ d3zkqd\_ d1fpt11 d1lo4l1 d1knob1 d3rrqa\_ d1ct8b1  
d4orz\_ d1mlbb1 d4hgkc1 d1dqdl1 d1bogb1 d4ozhe1 d1dr9a1 d1i7za1  
d1dn0b1 d1kell1 d1rzi1 d1ypzf1 d1wtla\_ d1hkfa\_ d1fail1 d1figh1  
d2vyre\_ d1sjva\_ d1lohqa\_ d1bfoa1 d1pkqb1 d1mjul1 d1b4j11 d1nsl1  
d2arj1 d1p4bh\_ d4aj0a\_ d3nn8b\_ d2rcja1 d1f2xk\_ d4v1dd\_ d1adqh1  
d2eksa\_ d4k3ga\_ d1jfqh1 d1luweh1 d1frgh1 d4gftb\_ d1uz8b1 d4nlea\_  
d1bm3l1 d1clol1 d3mcka1 d2vq1a1 d1ae6h1 d4aq1b1 d1uj3b1 d1nbqa1  
d1fh5l1 d2ck0l1 d2ywza\_ d1q72l1 d4nxbx\_ d1hila1 d4hz1b1 d2j88l1  
d1zmya1 d1cd0a\_ d1a4ka1 d1psk11 d1a0qh1 d4krmb\_ d1ncbh1 d2fbjh1  
d1j8he1 d1i3ua\_ d1cf8l1 d1fe8h1 d2p1ya1 d1eeqa\_ d2x89a\_ d1o10a\_  
d2r0lh1 d1ub5a1 d1dfbh1 d3eyvb1 d4jdvb1 d4p2cg\_ d2gsia1 d2agj11  
d1u3ha1 d2h1ph1 d1rih1 d1fskc1 d1boga1 d2a77l1 d1ospl1 d1qfoa\_  
d3dwt\_ d2fx7l1 d1rz7l1 d3stba1 d1pkqa1 d1b6da1 d1dzba2 d1dzba1  
d1kj2a\_ d4l1ha\_ d1rzgb1 d1dq1h\_ d12e8l1 d1miel1 d1jmaa\_ d1sbs11  
d1fgnh1 d1f58l1 d1mqkh\_ d1ndgb1 d3qeg11 d1iail1 d2aw2a1 d1tqbc1  
d3fo2a1 d4dkaa\_ d1f8th1 d2g60l1 d2ywy\_ d1uj3a1 d1yc7a\_ d3bd3a\_  
d4w6xb1 d1nmb1\_ d1i8ka\_ d1rj1b1 d1ypze1 d1p7kb1 d1kxqe\_ d1gpoh1  
d2z4qa1 d1w72h1 d1i9r11 d4qgya1 d4xt1c\_ d2qqnh1 d1cica1 d3c08h1  
d2cd0a\_ d2bdnh1 d1hnga1 d1mam11 d1nldh1 d1cr9h1 d4lcih1 d3bkyh1  
d3qg7l1 d1ai111 d1kxvc\_ d4iosd\_ d1l7ih1 d2x1qa\_ d1ub6b1 d3k74b\_  
d1libgh1 d1teth1 d1igy1 d1hxma1 d2x6ma\_ d2e71a\_ d5e03a\_ d1qfwm\_  
d2r0kh1 d1igjb1 d1rurh1 d1plgh1 d1mj8h1 d1yuhb1 d3fmg11 d1rzfl1  
d1emt11 d1ad9b1 d1igtb1 d1nlb11 d1d5ih1 d3k7ua\_ d4ffyh\_ d1bwwa\_  
d3dvg1 d1a6ta1 d1fgvl\_ d4qxgl1 d1mim11 d1jh11\_ d2hffb1 d2hh011

d1qkzh1 d1l7t11 d1afvh1 d1iaii1 d2cjuh\_ dlum5h1 d2ghwb2 d2ghwb1  
d1kgce1 d2fgwh1 dlikfh1 d1dvfd\_ d2i24n1 d2xtjb\_ d1za3b1 d2ycla\_  
d2hh0h1 d2x1oa\_ d1bvka\_ d1rjla1 d5e7ba1 d1igta1 d1i11b1 d2fb4l1  
d1mvua\_ d1jptl1 d32c2a1 d1fvca\_ d1iqdb1 d2hrph1 d2p4ab\_ d4qo1a\_  
d1p2cb1 d1wt5c\_ d1t4ka1 d5c1mb\_ d1it9l1 d1bz7a1 d1b2wh1 d1e4wl1  
d1jnl11 d1yedb1 d1za6b1 d3u7aa\_ d1igfh1 d3gnml1 d1orsa1 d1wejl1  
d1a2ya\_ d1hxmb1 d1gafh1 d2j4wh1 d1pz5a1 d1j05a\_ d1a3rh1 d4fq1l1  
d1qfwh\_ d1eo8h1 d1n7mh1 d4s11a\_ d1kegh1 d5da4a\_ d1iqwl1 d3whxb1  
d1vgeh1 d1deeb1 d1c12b1 d1t2ql1 d1ad9a1 d3gsnb1 d3b2uc1 d1ggbh1  
d1t3fb1 d1nakl1 d4ocmc\_ d1lila1 d2v7hb3 d2esve1 d1mcoh1 d2qr0b1  
d2q3aa\_ d1ct8a1 d1kcr11 d2pxyb\_ d2uzih\_ d5c3ld\_ d3durb\_ d1c5cl1  
d2ak4e1 d1dl7h\_ d1xiwd\_ d1mlba1 d1rmfl1 d1i7zb1 d1dlfl\_ d2xa3a\_  
d5bq7b1 d1dqqb1 d3h42l1 d1egjh1 d1kcvl1 d1fe8l1 d2j6el1 d1f3rb2  
d11k3l1 d1sm3h1 d1q0xh1 d1ghfh1 d7fabl1 d1igch1 d1lo0h1 d4idla\_  
d5c2b1\_ d1jrh11 d1i11a1 d3zhda1 d4kfzc\_ d1b0wa\_ d1e6oh1 d1mexl1  
d4krpb\_ d1fnsh1 d1ncwh1 d4hgma\_ d4eigb1 d4rzca\_ d2mpal1 d4y5xa\_  
d5en2b1 d3lrga1 d4ej1c1 d1rhha1 d1j05b\_ d1forh1 d1q9wb1 d2wzpd\_  
d2aq2a1 d1h0da1 d3revb1 d2ij0c1 d1tzha1 d4m7jl1 d1k6ql1 d3b9kc1  
d1igml\_ d3qeua1 d1dsfl\_ d1celh1 d1kcu1 d1zvha1 d1zvoa1 d1tqbb1  
d1ay1l1 d2qscl1 d2cgrh1 d1n10h1 d1ken11 d3eo0a1 d4n9ob1 d1n0xl1  
d3k1kc\_ d1c4qa\_ d1prtcl1 d2wv6d\_ d1prtfl\_ d1ltrd\_ d4l63b1 d1r4pb\_  
d1prtd\_ d1tl0f\_ d2bosa\_ d3chbd\_ d2cqva1 d1fhga\_ d2k1ma\_ d2dl2a1  
d1biha3 d1biha1 d1biha4 d3qp3a1 d1glca\_ d1gxea\_ d1cvsc2 d1cvsc1  
d1xmwa2 d1m4ka2 d2otpa2 d1biha2 d1rhfa2 d2fcba2 d2fcba1 d1wwbx\_  
d1gsma2 d1lepfa1 d1lepfa2 d2dava1 d1waaa\_ d1f97a2 d1x44a1 d1vcaa2  
d1fnla2 d1fnla1 d3b5ha2 d3h8na2 d3h8na1 d1bjba1 d1bjba2 d1pd6a\_  
d1f2qa2 d1f2qa1 d3cx2a\_ d1nbqa2 d3b5ha1 d1n26a1 d1xiwb\_ d1xaua\_  
d1fltx\_ d2ifga1 d1olla1 d1olla2 d1cs6a4 d1cs6a3 d1cs6a2 d1cs6a1  
d2gw5a2 d1sy6a1 d1xiwa\_ d1lucta2 d1lucta1 d1ry7b2 d1gl4b\_ d1qz1a3  
d1olza1 d2c9aa1 d1wwca\_

**Family-54 (c.2.1.6)**

**Positive dataset contains 12 protein sequences.**

d1txga2 d3f47a1 d2pv7a2 d1xc2a3 d2ahra2 d4xiya1 d2f1ka2 d1teaa3  
d2i76a2 d2g5ca2 d1wdka3 d3cuma3

**Negative dataset contains 3793 protein sequences.**

d1m32a\_ d1libja\_ d1c7na\_ d1iuga\_ d4q75a\_ d2bkwa1 d1t3ia\_ d1n8pa\_  
d1qz9a\_ d1jff9a\_ d1p3wa\_ d3kgwa\_ d1cl1a\_ d2ctza1 d1vjoa\_ d2rfva\_  
d1gc0a\_ d1cs1a\_ d1d2fa\_ d2ch1a1 d1qgna\_ d1pffa\_ d1elua\_ d1xkla\_  
d2wfla\_ d3i2ka1 d1lnsa3 d2cfba1 d1dfoa\_ d1o69a\_ d1bj4a\_ d3k28a\_  
d2bwpa\_ d3lg0a\_ d2fnua\_ d3ou5a\_ d1z7da1 d1iaya\_ d4msoa\_ d1bs0a\_  
d1s0aa\_ d1sffa\_ d3tqxa\_ d1mdoa\_ d3qboa\_ d3pgya\_ d1bjna\_ d2dkja\_  
d1ejia\_ d1vefa1 d4wxga\_ d3bs8a\_ d3gbxa1 d1w23a\_ d3lgia\_ d3i77a\_  
d2z9ia2 d4nsva\_ d1lcya2 d4jcna\_ d1agja\_ d1os8a\_ d1hpga\_ d1l1ja\_  
d1qtfa\_ d1cixa\_ d1y29a\_ d1v7fa\_ d2jtba\_ d1dlha\_ d1g9pa\_ d1lupa\_

d1qk7a\_ d1mb6a\_ d2a2va\_ d1niya\_ d1i25a\_ d2mpqa\_ dl1e6a\_ d1kqha\_  
d1la4a\_ d2mxa0a1 d1d10a\_ d1koza\_ d1qk6a\_ d1emxa\_ d1lqra\_ d1c6wa\_  
d1qnia1 d1fwa1 d1f56a\_ d1bypa\_ d1azca\_ d1ws8a\_ d3u25a\_ d1cuoa\_  
d1id2a\_ d1rkra\_ d2iaac\_ d4dp1x\_ d1nwpa\_ d2gima\_ d2i7sa\_ d1qhqa\_  
d1gyca3 d1hfua2 d1kbva1 d1kbva2 d1sdda1 d1sdda2 d1gyca1 d1gyca2  
d1mzya1 d2bw4a1 d1aoza1 d1aoza3 d1aoza2 d1kyaa2 d1kyaa3 d1kyaa1  
d1mzya2 d4e9sa1 d1sddb1 d1sddb2 d1hfua1 d1hfua3 d1oela2 d1oela1  
d1v10a2 d1v10a3 d1v10a1 d1rypd\_ d1irua\_ d1rypc\_ d3unfk\_ d1rypa\_  
d1j2pa\_ d1irui\_ d1j2qh\_ d3unfh\_ d1m4ya\_ d1rypb\_ d1irul\_ d1irug\_  
d1iru2\_ d1q5rh\_ d1rypg\_ d1g3ka\_ d1iruf\_ d1q5qa\_ d1e94a\_ d1irub\_  
d1ryph\_ d3ty6a\_ d1iruj\_ d1iruk\_ d1rype\_ d1irud\_ d1irue\_ d3mi01\_  
d1rypf\_ d1iruh\_ d2z3ba\_ d3mka2\_ d1iru1\_ d3sxwa1 d1j3qa\_ d4luka\_  
d1a3qa1 d1iknc\_ d3brda1 d1p7h11 d1oy3c\_ d1imhc1 d1gjia1 d1zk9a1  
d2cxka1 d2bema\_ d1pama1 d1ea9c1 d1qhoa1 d2fhfa2 d2fhfa1 d1k3ia1  
d1j0ha1 d1cxa1 d2bhua1 d1edqa1 d1f1sa2 d1ut9a2 d1gvia1 d1txka1  
d1adqa1 d1fnga1 d1uvqb1 d1zs8a1 d2vola1 d2vola2 d1mfbl2 d2jelh2  
d1uwe12 d3qq4b1 d1kjob\_ d1k5na1 d1osph2 d4odh12 d1low0a1 d1low0a2  
d1bfob2 d3l9ra2 d3jtth1 d2fath2 d4elkb2 d1fn4b2 d2xfxb\_ d1pg7x2  
d1cqka\_ d4k71b2 d1lk2a1 d1eapb2 d4lfhg2 d1i4fa1 d2nw2a2 d1kfah2  
d1mhca1 d1h3ua1 d1wejh2 d1h0db2 d1a5fh2 d1kcvh2 d1mjuh2 d1qqda1  
d1kcrh2 d1k8ia1 d3huja2 d2nnab1 d1nfd2 d3mffb2 d1s9va1 d1lk3h2  
d1q0xl2 d1fv1b1 d1neza1 d4rfeb2 d1r3ha1 d1a6tb2 d1kjva1 d1pz5b2  
d1onqa1 d2bc4a2 d1de4a1 d1k8da1 d1tcra2 d1dn0b2 d1nfd2 d2xwtb2  
d1bfoa2 d1mexh2 d1iakb1 d1ypzf2 d4f7ea2 d1q72l2 d2fbjh2 d1fe8h2  
d1clzh2 d1fngb1 d1uvqa1 d1vgka1 d1c16a1 d4j12a2 d4x99b2 d1igtb3  
d1je6a1 d1q72h2 d1nldh2 d1teth2 d2hmic2 d1ilca2 d1ilca1 d1k8ib1  
d1q0yh2 d1kfa12 d3frua1 d1pg7w2 d1u58a1 d1igyb4 d1igyb3 d1hyrc1  
d1klub1 d1deeb2 d1c12b2 d2bc4b2 d2ig2h2 d1kcv12 d3wn5b1 d1lk2b\_  
d1lk3l2 d1mjul2 d1sm3h2 d1q0xh2 d1zvsal d1ydpal d1u8ib2 d1ypze2  
d1kcu2 d1mqta\_ d1d4m3\_ d1fmd3\_ d2mev1\_ g1aym.1 d1ev13\_ d4q4w1\_  
d1r1a3\_ d2x5ia\_ d1rhi1\_ g1r1a.1 g1d4m.1 g1rhi.1 d1b35b\_ d1lopa\_  
d1tme1\_ d4iv1a\_ g1fnp.1 d1fnp1\_ d4gb31\_ d1d4m1\_ d1fmd1\_ d1ev11\_  
d2wzr3\_ g1cov.1 d1qqp3\_ g1fmd.1 d2x5ic\_ d1rhi3\_ g1oop.1 d1hxs1\_  
g1hxs.1 d1fnp3\_ d1bev1\_ g2mev.1 d1eah3\_ d1aym1\_ d1pvc3\_ d1qqp1\_  
d1zba3\_ d1h8ta\_ d3vbhc\_ g1b35.1 g1bev.1 d1hxs3\_ g1ev1.1 d1bev3\_  
g1tmf.1 d1tmf1\_ d1b35a\_ d2mev3\_ g1eah.1 g1h8t.1 d1eah1\_ d4q4w3\_  
d1r1a1\_ d1aym3\_ d1pvc1\_ d1zba1\_ d1h8tc\_ d1oopc\_ d1tme3\_ g1qqp.1  
d4iv1c\_ g1tme.1 d1ep0a\_ d2pa7a1 d1wlta1 d1nxma\_ d2c0za1 d1nepa\_  
d1ex0a1 d1g0da1 d2b5ea2 d2b5ea3 d2b5ea1 d2b5ea4 d2kp1a1 d2kp2a1  
d1hyua3 d1hyua4 d1j08a1 d1j08a2 d3nvva1 d1krha3 d2h88b1 d1n62a2  
d1t3qa2 d1kf6b2 d1zoyb1 d1jq4a\_ d1dgja2 d1rm6c2 d2bjca1 d2hsga1  
d1qpza1 d1efaa1 d1k9ua\_ d2opoa\_ d1ydwa2 d2nvwa2 d1zh8a2 d1qkia2  
d1xaaa2 d1t1ta2 d1r0ka3 d1j5pa3 d1vkoa2 d1vm6a2 d3qvsaa2 d1gr0a2  
d1p1ja2 d2ovga\_ d1sq8a\_ d1rzsa\_ d3kz3a\_ d3orca\_ d3gpdg2 d2q49a2

d1hdgo2 d2g17a2 d2cvoa2 d2czca1 d3pwka2 dlobfo2 dli32a2 d1zyao2  
d2pkqo2 d1b7go2 d2hjsa2 d1cf2o2 d1vkna2 d1nvmb2 d2msya\_ d2djoa1  
d2r5za\_ d1au7a1 d1f43a\_ d2lmda1 d1akhb\_ d1s7ea1 d3nara\_ d1zq3p1  
d2craa1 d1mija\_ d4uuta\_ d3a01a\_ d1x58a1 d3rkqa1 d3cmya1 d2cqxa1  
d2da6a1 d1e3oc1 d1fjla\_ d1mh3a1 d1ig7a\_ d1x41a1 d1wh7a1 d1gt0c1  
d2mw8a\_ d1lfup\_ d1x2ma1 d1b72a\_ d1wi3a1 d1wjha1 d1x2na1 d1mnm\_  
d2cuea1 d3k2aa\_ d2hosa\_ d2jwta2 d1pufa\_ d1oact1 d2hi3a\_ d1b8ia\_  
d4j19a\_ d3lnqa\_ d1wh5a1 d1b8ib\_ d1fexa\_ d2cqra1 d1guua\_ d1ug2a1  
d2cqqa1 d2ajea1 d4a69c\_ d1h8ac1 d2crga1 d2iw5b1 d1xc5a1 d2cu7a1  
d1wgxa1 d2cjja1 d2ckxa1 d1gvda\_ d1hcra\_ d1tc3c\_ d1gdta1 d1u78a2  
d1xg1a1 d1hlva1 d1iufa2 d1iufa1 d1igna1 d1bl0a1 d1d5ya1 d1d5ya2  
d3lv8a\_ d1s3ga1 d1zaka1 d1s4qa\_ d3tvta2 d1uf9a\_ d1khta\_ d1cke\_  
d1osna\_ d1p5zb\_ d4tmka\_ d3cm0a\_ d1tmka\_ d1jaga\_ d3h86a\_ d1t0hb\_  
d1nn5a\_ d2h92a\_ d3kb2a1 d2c95a1 d1yj5a2 d1kgda\_ d1ly1a\_ d2ak3a1  
d1vyva2 d1deka\_ d2grja1 d1p3ja1 d1y63a\_ d1e4ya1 d1s96a\_ d3iija1  
d1lvga\_ d1nksa\_ d1vyua2 d4e22a\_ d1qf9a\_ d1jjva\_ d1q3ta\_ d1ki9a\_  
d1teva\_ d1kjwa2 d1gsia\_ d1g3ma\_ d1j99a\_ d1t8ta1 d1nsta\_ d1fmja\_  
d1zrha\_ d1ls6a\_ d2a3ra\_ d2zptx\_ d3ckla\_ d1texa\_ d1q44a\_ d2gw\_  
d1z0ja1 d3umra2 d3gj0a1 d2gaoa1 d1yzga1 d1x3sa1 d1g7sa4 d1puja\_  
d1udxa2 d1kk1a3 d2o52a\_ d1jwyb\_ d1zcaa2 d1zcba2 d2fv8a1 d2cjwa\_  
d3dz8a1 d1xzpa2 d1vg8a\_ d4qxaa\_ d2ew1a1 d1x1ra1 d2bcgy\_ d3doea1  
d3cona\_ d3rega\_ d3wyga\_ d1upta\_ d2b6ha1 d1zd9a1 d1lnza2 d1r5ba3  
d1n0ua2 d1r2qa\_ d2f91a1 d2rhda\_ d3q3jb\_ d3q85a\_ d1efma1 d1r8qa\_  
d2gf9a1 d2akab1 d1ek0a\_ d1z08a1 d2gcoa1 d2dy1a2 d4g01b\_ d2cxxa1  
d1svia\_ d3q72a\_ d1ni3a1 d4ac9a4 d2erxa1 d2bmea\_ d1wxqa1 d2gf0a1  
d41dja1 d1zunb3 d1d5ca\_ d4lv5b\_ d1efca3 d1kmqa\_ d2g6ba1 d3lrpa\_  
d1tada2 d2y8ea\_ d4rd4a1 d1z06a1 d2heia\_ d3a58b\_ d1u01a2 d1d2ea3  
d1zj6a1 d2ocba\_ d3rwoa\_ d1mr3f\_ d2e9sa1 d4u5xa1 d2iwra\_ d2fn4a1  
d3bwdd\_ d2nzja1 d2atva1 d2ksqa\_ d3l43a\_ d1mkya2 d1mkya1 d1wmsa\_  
d1jnja3 d2rmka\_ d1f60a3 d1gota2 d1jala1 d2fh5b1 d1g16a\_ d2wblc\_  
d1m7ba\_ d1wf3a1 d1f5na2 d1t9ha2 d1z6xa1 d1z0aa1 d2fg5a1 d2a5ja1  
d2bcjq2 d1s0ua3 d1ky3a\_ d4y0va\_ d4lhwa\_ d2qmea1 d2atxa1 d1lega1  
d1ryha\_ d1moza\_ d1nrjb\_ d2erya1 d3bfka\_ d1puia\_ d1fzqa\_ d3j3az1  
d3t5ga\_ d1shza2 d3defa\_ d2f7sa1 d3raba\_ d3tsoa\_ d3aq4a\_ d2a17a1  
d3sfva1 d3bc1a\_ d2ncda\_ d1sdma\_ d3h4sa1 d2heha\_ d2grya\_ g3kin.1  
d1kk8a2 d1br2a2 d1goja\_ d1f9va\_ d2mysa2 d1lkxa\_ d3t0qa\_ d4db1a1  
d3gbja\_ d1v8ka\_ d1vava\_ d1uaia\_ d1jmx2 d1jmx1 d1pbya1 d1g99a2  
d2e1za2 d2e1za1 d1saza1 d1saza2 d1ig8a1 d1czan2 d1czan3 d1czan1  
d1ig8a2 d1czan4 d1bg3a4 d1bg3a3 d1bg3a2 d3h3no1 d3h3no2 d3ezwa2  
d3h1jd1 d2d0oa3 d2d0oa2 d1nbwa2 d1hroa\_ d4gedb\_ d3zooa\_ d1mz4a\_  
d1gu2a\_ d1f1fa\_ d1dvva\_ d1c6ra\_ d1c75a\_ d1e29a\_ d1gdva\_ d1cnoa\_  
d1h32b\_ d2bh4x\_ d2aiua\_ d5cytr\_ d1jdl1a\_ d1i8oa\_ d2zboa\_ d3dmia\_  
d1ls9a\_ d1wvec\_ d2yk3a\_ d3ph2b\_ d1dw0a\_ d5aura\_ d1ql3a\_ d1qn2a\_  
d1f1ca\_ d2nqya\_ d1h4ga\_ d1hixa\_ d1oa2a\_ d1olra\_ d3b7ma\_ d4h7ma1



d3wp3a\_ d2vgda\_ d1lgoa\_ d3zsea\_ d2nlra\_ d3wx5a\_ d1oa3a\_ d1pvxa\_  
d1m4wa\_ d1f5ja\_ d1oa4a\_ d1ks5a\_ d4ixla1 d3sita1 dlevsa\_ d1cnt1\_  
d1pvhb\_ d1z7ca\_ d1huwa\_ d1bgea\_ d1f6fa\_ d1f45b\_ d1i1rb\_ d1axia\_  
d1etea\_ d3tgxb\_ d1scfa\_ d2z3qa1 d3qbla\_ d1hula\_ d1m48a\_ d4nkqb\_  
d1eera\_ d1v7mv\_ d5e4ea\_ d2o27a\_ d3b5ka\_ d2psma1 d4zf7a\_ d3uf5a\_  
d4x51a\_ d1d9ca\_ d4ypgc1 d3oq3a\_ d1lqsl\_ d1aula\_ d1wu3i\_ d3bes1\_  
d3ux9a\_ d1v8fa\_ d2ejca\_ d3muea1 d1ihoa\_ d3q12a1 d2b7la\_ d2e17a\_  
d1iq0a2 d1irxa2 d1r6ta2 d1ivsa4 d2cyba\_ d1rqga2 d1j09a2 d2yxna\_  
d1f7ua2 d1h3fa1 d1ffya3 d2g36a1 d1nzja\_ d1jila\_ d1n3la\_ d1i6la\_  
d1pfva2 d1h3na3 d3n9ia\_ d3sz3a1 d3sw2a\_ d1moxc\_ d1dx5i3 d1edmb\_  
d1aut12 d1aut11 d1nqlb\_ d1dva11 d1szba2 d1kigl\_ d2y5fl\_ d1ijqa2  
d1gk5a\_ d1g1sa2 d1nt0a3 d1xdtr\_ d1lmja2 d1lmja1 d1nzia2 d2wphe\_  
d1klil\_ d1pfx12 d1pfx11 d1p9ja\_ d1g1ta2 d1f7ea\_ d4yzub\_ d1lr7a1  
d2y5ia\_ d1psra\_ d3n22a\_ d2egda\_ d4ggfc\_ d2wcea\_ d2luca\_ d4aqia\_  
d3nsia\_ d2lp3a\_ d1j55a\_ d1a4pa\_ d1k8ua\_ d1nsha\_ d1pvaa\_ d3fs7a\_  
d1ttxa\_ d1rwya\_ d2kyfa\_ d1rk9a\_ d1a75a\_ d1exra\_ d1tiza1 d1nyaa\_  
d1g8ia\_ d1ggwa\_ d1wdcc\_ d3fwba\_ d1ggza\_ d2o5ga\_ d1ctaa\_ d1m45a\_  
d3i5gc\_ d1sl8a\_ d1fpwa\_ d2scpa\_ d2roaa\_ d4aqra\_ d3pn7b\_ d1br1b\_  
d2mysb\_ d1s6ca\_ d1bjfa\_ d2obha\_ d1jfka\_ d1jf0a\_ d1qv0a\_ d1lkja\_  
d2mlfc\_ d2m97a\_ d2d8na\_ d4by5a\_ d1jbaa\_ d4nqga\_ d1wdcb\_ d2mysc\_  
d1j7qa\_ d1s6ia\_ d1uhka2 d1r2ua\_ d1dtla\_ d3kf9a\_ d3pn7c\_ d5d67d\_  
d1tuza\_ d1eg3a1 d1eg3a2 d2zkmx1 d1snla\_ d1wkya2 d1uuqa\_ d3wh9a\_  
d4m1ra\_ d1xyza\_ d4xuya\_ d2je8a5 d4bf7a1 d3cuia\_ d1ur4a\_ d1qw9a2  
d1odza\_ d2vzsa5 d1bqca\_ d2x2ya1 d1hjqa\_ d1qnra\_ d4y7ea1 d1vjza\_  
d4k68a\_ d2v3ga\_ d4hpga\_ d1nofa2 d1nq6a\_ d1h4pa\_ d1aq0a\_ d3ziza\_  
d4bs0a\_ d1ecea\_ d1h1na\_ d1ta3b\_ d1w91a2 d1ilwa\_ d1uhva2 d1us3a2  
d1egza\_ d7a3ha\_ d1tvna1 d3nyda1 d1ghsa\_ d2cyga1 d4xv0a\_ d2c8na2  
d1w32a\_ d3emca\_ d1v6ya1 d1foba\_ d2uwfa1 d2fgla\_ d3niya1 d2c0ha1  
d1rh9a1 d1yq2a5 d1szna2 d1fa2a\_ d1pama4 d5do8a1 d1ea9c3 d1hx0a2  
d2fhfa5 d1qhoa4 d1avaa2 d1m53a2 d4m8ua1 d2gjpa2 d1lwha2 d4howa1  
d1ktba2 d1j0ha3 d3vm5a1 d2x1ia\_ d1wzaa2 d1uasa2 d2diea1 d1mxga2  
d1ht6a2 d1eswa\_ d1iv8a2 d5cpsa\_ d1ud2a2 d1zjaa1 d3gbea1 d1kwga2  
d1wdpa\_ d1gcya2 d1g5aa2 d1hvxa2 d3dhpa2 d2bhua3 d4do4a1 d3qgva1  
d1e43a2 d1g94a2 d2d3na2 d1gjwa2 d1gvia3 d1x1na1 d1r7aa2 d1tz7a1  
d4c7ga2 d2gjxa1 d1nowa1 d1jaka1 d1yhta1 d4toqa\_ d1wb0a1 d1w9pa1  
d1eoka\_ d1litxa1 d1kfwa1 d1edqa2 d2gsja\_ d1hjxa1 d1jnda1 d1vf8a1  
d3wdpp1 d3wq5a\_ d1gnxa\_ d4gxpa\_ d4hz8a\_ d3aiua\_ d1wcga1 d1qvba\_  
d3ahxa\_ d1v02a\_ d2dgaa\_ d1pbga\_ d1vffa1 d1qoxa\_ d4ha4a\_ d1e5wa2  
d1j19a2 d1isna2 d2a16b2 d1b9ra\_ d1offa\_ d1frra\_ d3wcqa\_ d1e9ma\_  
d1l5pa\_ d1wria\_ d1i7ha\_ d3av8a\_ d1czpa\_ d1rfka\_ d3p1ma1 d3b2ga\_  
d2bt6a2 d1jmxa3 d1pbya3 d1pbya4 d1h6ua1 d1r55a1 d3gboa\_ d1atla\_  
d1kufa\_ d1buda\_ d4q1la\_ d1yp1a\_ d1wnia\_ d1mdwa\_ d1ziva1 d1zcma1  
d1t3ca\_ d1epwa3 d2a97a\_ d3fiea\_ d3ioqa\_ d1fh0a\_ d1o0ea\_ d1khqa\_  
d1m6da\_ d2cb5a\_ d1cs8a\_ g8pch.1 d1s4va\_ d2pnsa\_ d1vsna1 d1mira\_

d1iwda\_ d2oula\_ d7pcka\_ d3bwka\_ d3bcna\_ d2p86a\_ d1pvja\_ d1pcia\_  
d1gece\_ d1deua\_ d4bs6a\_ d1xkga1 d1cqda\_ d1jqpa2 d2c0ya\_ d2bdza\_  
d3p5ua\_ d2o36a\_ d1k9xa\_ d1zoya1 d1qo8a2 d1d4ca2 d1jnra2 d1kf6a2  
d2jk6a2 d2jk6a1 d1fecal d1fecal d1lpfa1 d1lpfa2 d1xhca1 d1xhca2  
d1dxla2 d1dxla1 d1gera2 d1m6ia2 d1onfa1 d3lada2 d3lada1 d1w4xa1  
d1w4xa2 d1gesa2 d1mo9a1 d1xdia1 d1fl2a2 d1fl2a1 d1fcda1 d1fcda2  
d1h6va2 d1h6va1 d1mo9a2 d1gv4a2 d1gv4a1 d2gv8a2 d2gv8a1 d1aoga1  
d1aoga2 d1hyua1 d1ebda1 d1ebda2 d3dk9a1 d1qlra2 d1qlra1 d1gesa1  
d1pv8a\_ d1w5qa\_ d2c1ha\_ d1ohla\_ d1zbfal d2z1ha\_ d2etja1 d3qioa1  
d1j11a\_ d2e41a\_ d1j12a\_ d21sna1 d1uaxa\_ d2yv0x\_ d1mu2a1 d1ekea\_  
d1i39a\_ d1ps9a2 d1o94a2 d1cjca1 d1pn0a1 d1reoa1 d1ju2a1 d2f5va1  
d3c96a1 d2gmha1 d1pj5a2 d1gpea1 d1o5wa1 d1n4wa1 d2dw4a2 d2ivda1  
d1seza1 d2voua1 d1kdga1 d1s5ja1 d2hbja2 d2igia\_ d1wlja\_ d1qhta1  
d4dlea1 d1tgoa1 d2f96a1 d3tr8a1 d3mxma\_ d1q8ia1 d1y97a1 d1w0ha\_  
d1kfsa1 d2py5a1 d1noya\_ d1d5aa1 d1yt3a3 d2guia\_ d3mwpa1 d4kb1a\_  
d1iv0a\_ d1nu0a\_ d2d5ra1 d1ix2a\_ d2av4a1 d1wgqa1 d1v89a1 d2coda1  
d1zc3b\_ d1wg7a1 d1u5ea1 d1v61a1 d2coca1 d2ys1a1 d1v5pa1 d1ntya2  
d1wjma1 d1wila1 d1u29a\_ d1xx0a1 d1unqa\_ d2zkmx3 d1fhoa\_ d1v88a1  
d2adza1 d1x1fa1 d1p6sa\_ d2coaa1 d1btka\_ d1v5ma1 d1faoa\_ d2x18a\_  
d1dyna\_ d1x1ga1 d4kaxb\_ d2j59m1 d1ki1b2 d1xcga2 d1txda2 d1u5da1  
d1dbha2 d1wlha\_ d1upqa\_ d1v5ua1 d1foea2 d2fjla1 d1eaza\_ d2dfka2  
d2cofa1 d1kz7a2 d1k8ka2 d1k8ka1 d3uleb1 d3i33a2 d3i33a1 d1bupa1  
d1dkgd2 d1dkgd1 d4ci6a2 d1jcfa1 d4a2ba2 d2fxua1 d1yaga2 d4cbua2  
d1bupa2 d1r7ha\_ d1faaa\_ d1wika1 d1xfla\_ d1ttza1 d2f51a1 d1ti3a\_  
d1nhoa\_ d1sena\_ d2i4aa\_ d1zmaa1 d1fo5a\_ d3lefa1 d3diea1 d2yana1  
d1z6na1 d1oaza\_ d3zywa1 d4aj8a\_ d1nm3a1 d4fiwa\_ d1wmja\_ d4hs1a1  
d1iloa\_ d1xwaa1 d1wjka1 d2vm1a\_ d1fb6a\_ d1gh2a\_ d1h75a\_ d1nw2a\_  
d1kx5b\_ d3a6na\_ d4m6ba2 d2nqbd\_ d3wkjd\_ d2yfwe\_ d4h9na\_ d5bnxa\_  
d1kx5c\_ d3r45a\_ d1eqzb\_ d4jjnb\_ d1f66c\_ d1eqza\_ d4wnnb\_ d1kx5a\_  
d1u35c1 d1id3a\_ d2nqbc\_ d1kx5d\_ d1ku5a\_ d1flea\_ d1b67a\_ d1tafa\_  
d1bh9b\_ d1tafb\_ d1jfib\_ d1q9ca\_ d1h3ob\_ d2byka1 d1n1ja\_ d4g92b\_  
d1bh9a\_ d1jfia\_ d1h3oa\_ d2bykb1 d1pd212 d1nhya2 d2a2ra2 d1k0dd2  
d1f2ea2 d1gsua2 d1f3ba2 d2fhea2 d2pvqa1 d1tw9a2 d1oyja2 d1e6ba2  
d1k0ma2 d3ik7a1 d4is0a1 d1r5aa2 d1jlva2 d1m0ua2 d3gtub2 d1z9ha2  
d1okta2 d1axda2 d2gsra2 d1tu7a2 d1k3ya2 d1zgma1 d1b48a2 d1gnwa2  
d1gwca2 d2gsta2 d1glqa2 d1oe8a2 d1pn9a2 d1v2aa2 d1fw1a2 d1duga2  
d3vrda1 d3vrda2 d1fcdc2 d1fcdc1 d1h1oa2 d1h1oa1 d1m70a1 d1nira1  
d1qksa1 d4ilya\_ d1chka\_ d4olta\_ d1qqya\_ d1gd6a\_ d1f6ra\_ d1livma\_  
d2gv0a\_ d1iiza\_ d2z2fa\_ d1j8xa\_ d1ghla\_ d1b9oa\_ d1691a\_ d2o4wa\_  
d1p37a\_ d1k28a3 d1xjta1 d1jtma\_ d2f2qa\_ d4e97a1 d1mpya2 d1kw3b2  
d4ghga1 d1tfza1 d3isqa1 d3isqa2 d1sqia1 d1sqia2 d1lkda2 d1lkda1  
d1mpya1 d1cjxa2 d1cjxa1 d1sp9b2 d1t47a1 d1t47a2 d1flua2 d1sp8a1  
d1sp8a2 d1flua1 d4iuaa3 d4bvva\_ d5hpga\_ d3k65a\_ d1ki0a3 d1ki0a2  
d1ki0a1 d1a0ha1 d1pmla\_ d3sp8a3 d2feba1 d1qsta\_ d2beia1 d4m3sa\_

d1u6ma1 d1ygha\_ d1yk3a1 d3dr6a\_ d1xmta\_ d1z4ea1 d2ge3a1 d1bo4a\_  
d2fiaa1 d2jdca1 d1y9wa1 d3to7a\_ d1wwza1 d2fl4a1 d2ozua1 d2b5ga\_  
d2cy2a1 d2p0wa\_ d1cm0a\_ d4pswa\_ d1yrea1 d1yr0a1 d1m4ia\_ d2gana1  
d1yvka1 d1ghea\_ d2g3aa1 d1y7ra1 d2euia1 d1q2ya\_ d2fsra1 d1xeba\_  
d2ae6a1 d1cjwa\_ d1qsm\_ d2aj6a1 d1y9ka1 d1i12a\_ d1vkca\_ d2atra1  
d1n71a\_ d2d4pa1 d2fiwa1 d2fe7a1 d1tiqa1 d2ou2a\_ d1yx0a1 d2fcka1  
d1p0ha\_ d2j8ma\_ d2pq8a\_ d1z4ra1 d1s3za1 d1ufha\_ d1dgsa2 d1fvia1  
d1ckma1 d1x9na2 d1c4qa\_ d1prtc1 d2wv6d\_ d1prtf\_ d1ltrd\_ d4l63b1  
d1prtd\_ d1tl0f\_ d2bosa\_ d1prtb1 d3chbd\_ d1xvqa1 d1pn0a2 d3hy2a\_  
d2cvba1 d1o8xa\_ d1lu4a\_ d1we0a1 d2bmx1 d2a4va1 d1psqa\_ d1xiya1  
d1q98a\_ d1n8ja\_ d1zofa1 d2ggta\_ d3tjja\_ d4je1a1 d3s9fa\_ d2zcta\_  
d1qmva\_ d1jfua\_ d2b1ka\_ d5dvba1 d2b5xa1 d2v2ga\_ d1st9a\_ d3tb2a\_  
d4llra\_ d4fh8a1 d1e2ya\_ d1knga\_ d2h30a\_ d1i5ga\_ d2z9sa\_ d2f8aa1  
d1tp9a1 d2b7ka\_ d1nm3a2 d3hvva\_ d2wfca1 d4kcea\_ d1xvwa1 d4gqca1  
d3qpma\_ d4k1fa\_ d1zzoa1 d1gp1a\_ d1prxa\_ d4od7a1 d1z6ma1 d4mcua1  
d4dvca1 d3l9sa\_ d1un2a\_ d3rppa\_ d1f74a\_ d3l21a\_ d2e1da\_ d1to3a1  
d1w3ia\_ d1sfla\_ d1n7ka\_ d1vcva1 d4imea\_ d1wa3a\_ d2ocza1 d1f2ja\_  
d3m16a\_ d2yxga\_ d1ub3a\_ d3a5fa\_ d1fbaa\_ d1l6wa\_ d1xfba1 d1wx0a1  
d1vpxa1 d1ojxa\_ d1mxsa\_ d2a4aa1 d1xkya1 d3cq0a1 d3s1xa\_ d1f05a\_  
d1fdja\_ d3cpa1 d4d2ja\_ d2ph1a2 d2ph1a1 d1fxza2 d1fxza1 d1lrha\_  
d1uija1 g1dgw.1 d2v09a\_ d1uika2 d1uika1 d1dgwa\_ d1e88a1 d1l6ja5  
d1l6ja4 d1eaka4 d1eaka3 d1l6ja3 d1h8pa1 d1etha2 d1w52x1 d2pp1a1  
d1hpla2 d1lpbb2 d2oxea1 d1bu8a2 d1rpl1a2 d1ysl1x\_ d4hs9a\_ d1ex9a\_  
d1ku0a\_ d3qmma\_ d1n9wa1 d1e1oa1 d1c0aa1 d1b8aa1 d1l0wa1 d3a74a1  
d1eova1 d3rp2a\_ g1lucy.1 d1fuja\_ d2zchp\_ d3w94a\_ d1si5h\_ d1l06a\_  
g2pka.1 d1cgha\_ d1kigh\_ d1a5ia\_ d3s9ba\_ d1hj8a\_ d1ao5a\_ d2anya\_  
d1q3xa1 d1gvza\_ d1azza\_ d4gsoa\_ d2f91a1 d1iaua\_ d1gdna\_ d1eufa\_  
g1fiw.1 d1eq9a\_ d4nfea\_ d2rdla\_ d1spja\_ d1elva1 d1a7sa\_ d1ekbb\_  
d1pfxc\_ d1yc0a\_ d2aiqa\_ g1fiz.1 d1fi8a\_ d4k60a\_ d4dgja\_ d1mzaa\_  
d1op0a\_ d3tjva\_ d1pytd\_ d1sgfg\_ g1gg6.1 d2eeka\_ g1rtf.1 d1a0ja\_  
d3g01a\_ d1pytc\_ d4e7na\_ d1ddja\_ d1z8ga1 d2hlca\_ d1npma\_ d1brup\_  
g1jou.1 d1sgfa\_ d1autc\_ g2hnt.1 g1kdq.1 d1orfa\_ d3s69a\_ d4crga\_  
d1fxya\_ d1bqya\_ d4wfia\_ d4cg1a1 d3visa\_ d1svpa\_ d1mbma\_ d3su6a1  
d1cula1 d4agka\_ d1vcpa\_ d1q31a\_ g1n11.1 d3e90b\_ d1ep5a\_ d3u1jb\_  
d3zxha\_ d1cgla\_ d1rm8a\_ d1eaka2 d1hy7a\_ d2jsda\_ d1cxva\_ d1hv5a\_  
d1i76a\_ d1eb6a\_ d4dv8a2 d1j7na1 d1dzka\_ d4tlja\_ d2a2ua\_ d4wfva\_  
d3t1da\_ d4iaxa\_ d3zq3a\_ d2nnda\_ d1i4ua\_ d1kxo\_ d1bbpa\_ d1kt7a\_  
d1exsa\_ d3s26a1 d1lf7a\_ d4gh7a\_ d1z24a1 d1qabe\_ d1xkia\_ d1ew3a\_  
d3bx7a\_ d4iawa1 d1n0sa\_ d1gkab\_ d3kzaa\_ d2k23a\_ d2l9ca1 d2joza1  
d1gm6a\_ d3kffa\_ d3saoa1 d1e5pa\_ d1yupa1 d1iiua\_ d2tbvc\_ d1c8nc\_  
d1x36a\_ d1smvc\_ d1ng0c\_ d4sbvc\_ d1f2nc\_ d1ddla\_ d1e57b\_ d1js9c\_  
d1f15b\_ d1za7a\_ d1laja\_ d1novc\_ d2bbvc\_ d1ny721 d1ny722 d1a6ca3  
d1a6ca2 d1a6ca1 d1pgl22 d1pgl21 d1pgl11 d1ny711 d1jgta2 d1ofda3  
d1ea0a3 d1ecfa2 d1q15a2 d1ct9a2 d1te5a\_ d1y14b1 d2nn6i1 d1i941\_

d2zjra2 d1smxa\_ d2qamc2 d1hh2p1 d2r7da1 d1rl2a2 d1wfaq1 d3bzka4  
d1x6oa2 d3a0ja\_ d2j01d2 d2ja9a1 d4q15a\_ d1hr0w\_ d1luza\_ d2n3sa\_  
d2vnud1 d1h95a\_ d1go3e1 d2nn6h1 d1ne3a\_ d2mo1a\_ d1iz6a2 d1jjga\_  
d1e3pa2 d2ix0a3 d2ix0a2 d2lxja\_ d1ueba3 d1ueba2 d2z0sa1 d1u01a1  
d2ix0a1 d2eifa2 d2je6i1 d3i2za1 d2c35b1 d2ahob2 d1t9ha1 d3i4oa\_  
d2qall1 d1jt8a\_ d2nn6g1 d1g6pa\_ d3cama\_ d1i94q\_ d1c9oa\_ d1d7qa\_  
d2ba0a1 d2vnud2 d2vnud3 d2qalq1 d1wi5a1 d1xtda2 d1ny4a\_ d4w9ta\_  
d1jvna1 d4x2ra1 d1qo2a\_ d4axka1 d1thfd\_ d1h5ya\_ d4u28a\_ d2y88a\_  
d4wd0a\_ d1vzwa1 d1eixa\_ d3exra\_ d2ffca1 d2fdsa1 d3n3ma1 d2czda\_  
d1q6oa\_ d2yyua\_ d1vqta1 d1dbta\_ d3ldva1 d4lt9a1 d3tc7a1 d3hoja\_  
d1i4na\_ d3vnda\_ d3n18a1 d1geqa\_ d3naval d4a2ra1 d3tc6a1 d1ujpa\_  
d4ijba\_ d1xcfa\_ d1vc4a\_ d1rd5a\_ d1qopa\_ d3b5va\_ d2r80b\_ d1cqxa1  
d1cg5a\_ d1gcvb\_ d3boma\_ d2h8fb\_ d2raoa\_ d3bj1a\_ d4hrrb\_ d2r50a\_  
d3d1kb\_ d2aa1b1 d3zhwa\_ d3hf4b\_ d3gdja\_ d1jebb\_ d3bj1b\_ d1x9fb\_  
d1wmub\_ d1gcva\_ d3bcqb\_ d3d4xb\_ d1gvha1 d2dc3a\_ d3hf4a\_ d4yu3a\_  
d3k8ba\_ d1qpwb\_ d2r80a\_ d3bcqa\_ d1v4wa\_ d3wtgb\_ d1j17a\_ d4esaa\_  
d1a9we\_ d3d1ab\_ d1fsla\_ d4h21a\_ d1v4wb\_ d1mwca\_ d1vhba\_ d1jeba\_  
d1spgb\_ d1h97a\_ d1q1fa\_ d1tu9a1 d3d1aa\_ d1hdsb\_ d3hyub\_ d2zffb\_  
d3fs4a\_ d1oj6a\_ d1shrb\_ d4h21b\_ d4yu3b\_ d1spga\_ d3hrwa\_ d3qqra\_  
d3at5a\_ d4wchd\_ d3hyua\_ d1cg5b\_ d1uc3a\_ d1hbra\_ d2raob\_ d1outb\_  
d4esab\_ d3gdjb\_ d3qqqa\_ d1x9fc\_ d3vrfa\_ d1litha\_ d3mkba\_ d3d4xa\_  
d3mjpa\_ d1j16a\_ d3fh9a\_ d1outa\_ d2dc3b\_ d1it2a\_ d3eoka\_ d3g46a\_  
d1qpwa\_ d3vrfb\_ d1ch4a\_ d1x9fd\_ d1hdsa\_ d2zffa\_ d3mkbb\_ d1or4a\_  
d3wtga\_ d1a4fa\_ d3fh9b\_ d3bomb\_ d3cy5a\_ d3at5b\_ d1x9fa\_ d2oifa\_  
d4lmbx\_ d1cpcb\_ d3v57a\_ d1kn1a\_ d1cpca\_ d4f0ta\_ d2vjha\_ d4po5b\_  
d1eyxa\_ d1alla\_ d4f0tb\_ d1b33b\_ d1b8db\_ d4h0mb\_ d2vjhb\_ d4lm6b\_  
d2vmlb\_ d1allb\_ d2vjta\_ d3dbja\_ d2vmla\_ d2vjtb\_ d4f0ub\_ d1f99b\_  
d4rmpa1 d1lliaa\_ d1eyxb\_ d2uulb\_ d4lmsb\_ d4f0ua\_ d2bv8a\_ d1f99a\_  
d2bv8b\_ d2c71b\_ d3dbjb\_ d4rmpb1 d1b8da\_ d4h0ma\_ d3v57b\_ d1kn1b\_  
d1liab\_ d2uula\_ d2j96a\_ g1wh1.1 d1azwa\_ d2xqfa\_ d1f6wa\_ d1dx4a\_  
d1qe3a\_ d1k4ya\_ d4qwwa\_ d2ha2a\_ d1xm5a\_ d1xaxa\_ d1tvia\_ d1s5ja2  
d1qhta2 d4dlea2 d1tgoa2 d3py8a2 d1q8ia2 d1kfsa2 d2py5a2 d1d5aa2  
d2m5ta\_ d1cqqa\_ d1wqsa\_ d5bpea\_ d2ipha\_ d1lvoa\_ d2bhga1 d3tnta\_  
d3sjia\_ d3d23a1 d2fyqa\_ d3tloa\_ d3zvea1 d2hrva\_ d3q3ya1 d4asha1  
d1cg2a1 d1yloa2 d1y7ea2 d1y0ya3 d1lffa1 d1vixa1 d1fnoa4 d1vhua2  
d1ysja1 d1z21a1 d2fvga2 d1vgya1 d1r3na1 d2grea2 d1xmba1 g1q71.1  
d1rtqa\_ d1ra6a\_ d1muka\_ d3gsza\_ d1khva\_ d1te9a\_ d2xwha\_ d3uqsa\_  
d3hkwa\_ d3n6ma\_ d2cjqa\_ d2xyma\_ d1teba\_ d1te8a\_ d1s48a\_ d1u09a1  
d4wfxa\_ d3tyqa\_ d2pgga1 d1m41a\_ d2bk7a\_ d3fjua\_ d1z5ra1 d1kwma1  
d1uwya2 d1jqga1 d2c1ca1 d1h81a2 d4lu0a\_ d1of8a\_ d3unda1 d3e9aa1  
d1vr6a2 d2qkfa\_ d1d9ea\_ d1o60a\_ d1e69a\_ d1mv5a\_ d3g60a4 g1ii8.1  
d1ewqa2 d1ji0a\_ d1qhla\_ d1v43a3 d2wmfa1 d1vpla\_ d1g2912 d4a82a2  
g1f2t.1 d2d62a1 d3tuic1 d2bbsa1 d3g60a3 d2ixea\_ d1g6ha\_ d1sgwa1  
d2qi9c\_ d3rlfa1 d3b60a1 d3d31a2 d2pzea1 g1xew.1 d1jj7a\_ d1loxk2

d2onka1 d1w1wa\_ d1iwea\_ d1qf5a\_ d1vmaa2 d1nija1 d2p67a1 d3ihla\_  
d1okkd2 d1l1s1a2 d1s1ma2 d1liona\_ d2v40a\_ d1dj3a\_ d3hida\_ d2vo1a1  
d2g0ta1 d1vcoa2 d1j8mf2 d1g3qa\_ d1xjca\_ d1p9ba\_ d1qzxa3 d1ihua2  
d1ihua1 d2qm8a\_ d1dj2a\_ d4ioja\_ d1cp2a\_ d1yrba2 d1hyqa\_ d3gqba2  
d1skye3 d1xp8a1 d1tf7a2 d1tf7a1 d1ye8a1 d1skyb3 d2qe7d2 d4blta\_  
d4huta\_ d3l1daa2 d4hyya\_ d2i3ba1 d1cr1a\_ d3j9tb2 d3ntua2 d1vdza1  
d2z43a\_ d1e9ra\_ d1nlfa\_ d3ziaa2 d1n0wa\_ d1g6oa\_ d3ziad2 d3j9ta2  
d1pzna2 d3gqbb2 d2i49a\_ d1nnfa\_ d1xvxa\_ d1ursa\_ d1h3da1 d1iuda\_  
d4m1va1 d1twya\_ d3e13x\_ d2nxoa1 d4pfua\_ d3ttma\_ d1elja\_ d2qmw1  
d1us5a\_ d1y3na1 d1jeta\_ d1uqwa\_ d4f19a1 d2esna2 d3thia\_ d3fasa1  
d2uyeb\_ d2xwva1 d1r9la\_ d2fyia1 d1pb7a\_ d2ozza1 d1sw5a\_ d1nh8a1  
d1vr5a1 d2g29a\_ d1xs5a\_ d3lswa\_ d2z23a\_ d3w9va\_ d3tcha\_ d1q35a\_  
d1z7me1 d3q27a\_ d1p99a\_ d1ve4a1 d2i6ea1 d4mcoa1 d4n8ya\_ d1eu8a\_  
d1zbma1 d1hs1a\_ d1ixca2 d1j1na\_ d1xvya\_ d1y9ua\_ d2z22a1 d1xoca1  
d4oera\_ d1wdna\_ d5f1qa1 d1xt8a1 d1i6aa\_ d4gwoa\_ d4igta1 d1pc3a\_  
d4mmpa1 d2cz1a1 d2onsa2 d4mija1 d4ok5a1 d2bmfa1 d2bmfa2 d1yksa1  
d1yksa2 d1jr6a\_ d2qeqa1 d2jlqa1 d1eh3a\_ d3skpa\_ d1dtza1 d1dtza2  
d1ieja\_ d1jnfa2 d1ce2a1 d1jnf1a1 d1b1xa2 d1jw1a1 d1jw1a2 d1ryoa\_  
d1h76a1 d1h76a2 d1c4oa1 d2p6ra3 d2p6ra4 d1oywa2 d1oywa3 d1wrba1  
d1w36b2 d1w36b1 d1c4oa2 d3bora\_ d1t6na\_ d2eyqa5 d2eyqa3 d2eyqa2  
d2zu6a2 d1veca\_ d1uaaa1 d1w36d1 d2g9na1 d1z3ix2 d2rb4a\_ d1hv8a1  
d1hv8a2 d1t5ia\_ d1w36c2 d2j0sa2 d2j0sa1 d1fuka\_ d3hjha1 d1z5za1  
d1qdea\_ d1z63a1 d1s2ma2 d1s2ma1 d1wp9a1 d1wp9a2 d1gm5a3 d1gm5a4  
d3dina4 d3dina3 d1q0ua\_ d1w36c1 d1z3ix1 d1nkta3 d1nkta4 d1uaaa2  
d1w36d2 g1qhh.1 d2fwra2 d2fwra1 d2v8ta\_ d3q3ma\_ d1za0a1 d1mxra\_  
d2inca\_ d1jk0a\_ d2incb\_ d1mhyb\_ d3hf1b\_ d1mtyb\_ d1r2fa\_ d2uw1a\_  
d1mhyd\_ d3n37a\_ d1oquc\_ d1syya\_ d1mtyd\_ d2o1za\_ d1uzra\_ d1smsa\_  
d2fkza\_ d1zuj1a1 d1s3qa1 d2fjca1 d1z6om1 d1veia\_ d4dyya\_ d1jiga\_  
d3gvya\_ d2pyba\_ d4cy9a1 d3bvfa1 d1r03a\_ d2cf7a\_ d1nf4a\_ d1zs3a1  
d4iwka\_ d3ka8a\_ d3np0x\_ d1n1qa\_ d4e6ka\_ d1z6oa1 d2fzfa1 d4dyua\_  
d3ge4a\_ d1jgca\_ d4am4a\_ d2z6ma\_ d1ji5a\_ d1vlga\_ d1lko1 d1krqa\_  
d3qz3a\_ d1o9ra\_ d2ffxj\_ d1euma\_ d1yv1a1 d2v2pa\_ d1j30a\_ d4di0a\_  
d1dpsa\_ d1oewa\_ d2qzxa\_ d2asia\_ d1psoe\_ d1miqa\_ d1smra\_ d2h6ta\_  
d1pfza\_ d1lizda\_ d3hd8a\_ d1j71a\_ d1dpja\_ d4aa9a\_ d1t6ex\_ g1b5f.1  
g1lya.1 g1htr.1 d1qdma2 d1bxoa\_ d1wkra\_ d1tzsa\_ d1libqa\_ d2qzwa\_  
d1ex4a2 d1c6va\_ d2v76a\_ d1wj1a1 d1aqca\_ d1qqga2 d1ntva\_ d1n3ha\_  
d4dbba\_ d3f0wa1 d1p3ra\_ d1wgua1 d2cy4a1 d3hqca\_ d1wvha1 d1xr0b1  
d1bdqa\_ d3ggta\_ d3ixoa\_ d1mrxa\_ d2haha\_ d1tw7a\_ d4njsa\_ d1sgua\_  
d2p3da\_ d1nsoa\_ d3d3ta\_ d2rkfa\_ d1c6ya\_ d2rspa\_ d3ogpa\_ d3ekwa\_  
d2o4na\_ d2j9ja\_ d1baia\_ d3ggua\_ d3lzua\_ d4npua\_ d4j55a\_ d2r8na\_  
d2fxda\_ d2p3ca\_ d4dqa\_ d3ttpa\_ d3t3ca\_ d2p3aa\_ d2hc0a\_ d2fdda\_  
d3mwsa\_ d1k8rb\_ d1wgra1 d1ef5a\_ d1wfy1a1 d1e8ya3 d1wgya1 d1l1fda\_  
d2cs4a1 d1wxma1 d2bye1a1 d3kh0a1 d2byfa1 d1wxaa1 d1e7ua3 d1h4ra3  
d4y18a1 d2a16a3 d1wgda1 d1wgg1a1 d4q5eb\_ d1wjna1 d1se9a\_ d3n3kb\_

d1wz0a1 d1we6a1 d2m0xa\_ d2gbka\_ d3rt3b1 d1wh3a1 d1sifa\_ d2ekek2  
d4ii2b1 d4hk2a1 d1c3ta\_ d1m94a\_ d1wgha1 d1ttna1 d1j8ca\_ d1wx8a1  
d3v6cb1 d2ma9b\_ d4i61b1 d1bt0a\_ d2jvca1 d1iyfa\_ d2k1fa\_ d1wxva1  
d1wf9a1 d1t0ya\_ d2io0b2 d1x1ma1 d2gbma\_ d1zw7a1 d2m17a\_ d1ud7a\_  
d1we7a1 d2lwpa\_ d2gbja\_ d1wjua1 d1v6ea1 d1v86a1 d4eewa\_ d1wiaa1  
d4icva\_ d4gu2a\_ d1wx7a1 d1wy8a1 d4hjka1 d2faza1 d1v5oa1 d3ruib\_  
d3waob\_ d2r2qa1 d3m95a\_ d3wana\_ d3ubra\_ d1qo8a1 d1d4ca1 d2k3va\_  
d1ft5a\_ d1m1qa\_ d2j7aa\_ d1h21a\_ d1ogyb\_ d4fasa\_ d1jnia\_ d1oaha\_  
d1sp3a\_ d3h33a\_ d1rwja\_ d19hca\_ d1os6a\_ d3bxua\_ d3h4na\_ d1i77a\_  
d3caoa\_ d2ctha\_ d1duwa\_ d1ofwa\_ d2e84a\_ d1hh5a\_ d1gyoa\_ d3h34a\_  
d2ftba\_ d1pmpa\_ d2rcqa1 d1fdqa\_ d4lkpa\_ d1sa8a\_ d1vyfa\_ d1lpja\_  
d3vg7a1 d4azqa1 d1o8va\_ d5bvqa\_ d1p6pa\_ d2qo4a\_ d1opba\_ d1yiva1  
d1o1va\_ d4bvma1 d4tkba\_ d4i3ba\_ d1bwya\_ d1ftpa\_ d1ggla\_ d4gkca\_  
d1cbia\_ d3p6da1 d1kqwa\_ d2a0aa1 d1um8a\_ d1ixza\_ d1qvra2 d1qvra3  
d1sxjc2 d1jr3d2 d2p65a\_ d118qa2 d1g8pa\_ d3hu3a3 d1sxjd2 d1njfa\_  
d1in4a2 d1sxja2 d1tuea1 d2ce7a2 d1w5sa2 d1sxjb2 d1d2na\_ d1ny5a2  
d1ofha\_ d2gnoa2 d2a5yb3 d1fnna2 d1u0ja1 d1lv7a\_ d1iqpa2 d2fnaa2  
d1ixsb2 d4gita\_ d1sxje2 d1g41a\_ d21j7a\_ d1n4na\_ d2m8bb1 d2kyqa\_  
d3psma\_ d1jkza\_ d1jxca\_ d2g11a\_ d1ugla\_ d4uj0a\_ d2k4ua\_ d1hp2a\_  
d2lu9a\_ d1baha\_ d2meoa1 d1wm7a\_ d1hlya\_ d1n8ma\_ d1jlza\_ d1wpda\_  
d1c55a\_ d1pvza\_ d1wt7a\_ d1rjia\_ d1lw5a\_ d1m2sa\_ d1pjva\_ d1c49a\_  
d1qkya\_ d2ktca1 d1wmta\_ d1du9a\_ d1j5ja\_ d1rlga\_ d1t0za\_ d2i61a\_  
d1t1ta\_ d1sn4a\_ d1kv0a\_ d21kba\_ d1npia\_ d1wwna\_ d1pe4a\_ d2kbka\_  
d21i7a\_ d2kbha\_ d1dq7a\_ d1sega\_ d1omya\_ d1zywa1 d1jzaa\_ d1bn1a\_  
d1dy2a\_ d1iyjb4 d1iyjb5 d1iyjb3 d1o7ia\_ d4ipca1 d1x3ea\_ d4apva\_  
d1jb7a1 d1jb7a2 d1jb7a3 d3kdfa\_ d1ue1b\_ d1wjja1 d3eiva\_ d1xjva2  
d1xjva1 d2ccza2 d1se8a\_ d111oc\_ d1jb7b\_ d1qvca\_ d3ulla\_ d1qzga\_  
d1miua4 d1miua5 d1miua3 d3g48a1 d1gd7a\_ d1mkha\_ d1jjcb3 d3ubub\_  
d1legia\_ d1qo3c\_ d1v7pa\_ d1tdqb\_ d3ubua\_ d1c3ab\_ d1h8ua\_ d3bx4b\_  
d1t8ca1 d1sb2a1 d1qdda\_ d2ziba1 d3cada\_ d1byfa\_ d1j34b\_ d1jwia\_  
d1jzna\_ d1c3aa\_ d1wmza\_ d3bdwb\_ d1hq8a\_ d1fifa1 d1dv8a\_ d3hupa\_  
d1wk1a1 d1umra\_ d2afpa\_ d3bx4a\_ d1gz2a\_ d1sl6a\_ d1v7pb\_ d3g8ka\_  
d1ixxa\_ d1j34a\_ d1jwib\_ d1g1sa1 d1y17a1 d1ja3a\_ d1fvub\_ d3bdwa\_  
d1sb2b1 d1fvua\_ d1umrc\_ d1oz7a\_ d4m17a\_ d3cfwa1 d1ypqa1 d1g1ta1  
d3fd4a\_ d3l9jc\_ d4dn8a1 d1v41b\_ d1rd11\_ d2msba\_ d1prtc2 d1rpma\_  
d2shpa1 d1yfoa\_ d118ka\_ d2ooqa1 d1g4us2 d1p15a\_ d1lara2 d1lara1  
d1wcha\_ d2fh7a2 d2fh7a1 d1ohea1 d1ohea2 d2f4da\_ d1rxda\_ d2hxpa\_  
d1xria\_ d1d5ra2 d1fpza\_ d3ezza\_ d4y2ea\_ d1i9sa\_ d3azya\_ d3wvja\_  
d1upsa1 d1ajoa\_ d2hyka\_ d1ajka\_ d2vy0a\_ d1o4ya\_ d3o5sa\_ d3d6ea\_  
d3atga\_ d1umza\_ d3i4ia\_ d1c11a\_ d41bqa\_ d1a78a\_ d1slta\_ d4no4a\_  
d3zsja\_ d3duia\_ d1g86a\_ d1is3a\_ d1qmja\_ d1tdha3 d1q3ba3 d1ee8a3  
g1qmo.1 g1len.1 d3zyra\_ d1fnya\_ d1n47a\_ g21tn.1 d1avba\_ d3usua\_  
d1dhkb\_ d1f9ka\_ d1ukga\_ d1g8wa\_ d1g9fa\_ d1wbfa\_ d3wcsa\_ d1g7ya\_  
g1loe.1 d1mvqa\_ d1hq1a\_ d1v6ia\_ d1dbna\_ d1qnwa\_ d1fx5a\_ d418qa\_

d1ioaa\_ d3n35a\_ d2h0ba\_ d2erfa\_ dlh30a2 d3mw4a1 dlpz7a\_ d2r1ba\_  
d3v64a1 d1d2sa\_ d3bopa1 d3mw3a1 dl0kqa1 dl0kqa2 d2dara2 d2dara1  
d1wyha2 d2dloa2 d1rutx4 d1rutx3 d2cuqa2 d1x4la2 d1x4la1 d1x3ha2  
d1x3ha1 d2d8za1 d1x61a2 d1x6aa1 d1x6aa2 d2cora2 d2cora1 d1v6ga1  
d1v6ga2 d2d8za2 d1x64a1 d1x64a2 d1b8ta1 d2co8a1 d1x63a2 d2dj7a2  
d2dj7a1 d2cu8a2 d2cu8a1 d1g47a2 d1g47a1 d1j2oa1 d1wyha1 d2dloa1  
d1wiga1 d1wiga2 d2cupa2 d2cupa3 d1x68a1 d2d8ya2 d2d8ya1 d1m3va2  
d1x62a1 d1x68a2 d1x61a1 d1b8ta3 d1b8ta2 d2d8xa2 d2d8xa1 d1x4ka1  
d1x4ka2 d2cuqa1 d1m3va1 d2co8a2 d1j2oa2 d1x63a1 d2cura1 d2cura2  
d1x62a2 d1op9a\_ d1y0la1 d1letzb1 d1legj11 d2gsib1 d1nj9a1 d4jfhdl  
d1aqk11 d1t2ja\_ d1l04h1 d1zvya1 d3v4v11 d4enec1 d1kxtb\_ d5e8ea1  
d2pxya\_ d4weud\_ d1xiwc\_ d2esvd1 d1qznh\_ d1ogae1 d1f4xh1 d4n1hb\_  
d3ezjb1 d3mlw11 d1kfah1 d1etza1 d1b4jh1 d3cfic\_ d4w68a\_ d2arja1  
d1ek3a\_ d2ok011 d1vera\_ d1luwgh1 d1blnb1 d1fpth1 d1rzga1 d2giya1  
d4m3kb1 d1nc2a1 d2nyyd1 d1ncna\_ d1fbih1 d5dxwa\_ d4fqqa1 d1dqdh1  
d1jfq11 d1kelh1 d1faih1 d1frgl1 d1figl1 d4m6n11 d1fo0a\_ d4hxb11  
d3b5ga\_ d3quyd1 d2h9gb1 d1i8kb\_ d2dd8h1 d2ck0h1 d1eaja\_ d4w6wb1  
d2a6ib3 d1t66d1 d2e27h\_ d1ob1b1 d1f11b1 d2v7na1 d1ad0a1 d2xt1b1  
d1pskh1 d4i13b1 d2op411 d1a0q11 d1uwell1 d1za3a1 d1ncb11 d4uu9a\_  
d1bm3h1 d1cl0h1 d1nqba2 d1cf8h1 d4y5va\_ d1mhph1 d5anma1 d4cdgc1  
d4ldeb\_ d1y01b1 d2pcpb1 d1z3g11 d1dfb11 d1fh5h1 d3g5xa1 d1tzib1  
d4dn311 d3zhka1 d2b1hh1 d2uyla1 d1f3dh1 d1nj9b1 d2agjh1 d2h1p11  
d1q72h1 d8fabb1 d1ndmb1 d1rjca1 d4u6hb1 d3upca\_ d2fbj11 d1osph1  
d1tvda\_ d2cjh\_ d4fhbd1 d1bd2d1 d1rz7h1 d3nn8a\_ d1blna1 d1knoa1  
d1nfda1 d2bmkb1 d1dq11\_ d1igyb1 d1igf11 d12e8h1 d3utza1 d1nc2b1  
d1rihh1 d4mwfb1 d4jvpa1 d1mieh1 d1rhfa1 d1fgn11 d1sbsh1 d1lp9e1  
d1dn0a1 d4lqf11 d1iaih1 d1kgcd1 d1mh5b1 d1gpol1 d2g60h3 d1f8t11  
d2jixd1 d4grwh\_ d1fo0b\_ d1bfob1 d1axsa1 d1u9ka\_ d1nmbh\_ d1h8na1  
d1h8na2 d1jguh1 d4eura1 d3sdy11 d35c8h1 d1w7211 d1mvub\_ d1i9rh1  
d1ob1a1 d4wenb\_ d1yeeh1 d3ietc1 d1f58h1 d1ad0b1 d1mqk1\_ d1nbvh1  
d4b50a\_ d3r8bb\_ d1baf11 d1mamh1 d4rgne1 d2gsgb\_ d35c811 d1bafh1  
d1ailh1 d2pcpa1 d2fath1 d2x1pa\_ d1orsb1 d1ibg11 d1shma\_ d1a2yb\_  
d1u0qa\_ d2coqa\_ d1hilb1 d1qfwi\_ d1jv5b\_ d1fn4b1 d5e0qa\_ d1nsh1  
d1plgl1 d4ocx11 d1kb5h1 d1rzfh1 d1pg7x1 d2fx7h1 d2oi9c\_ d1l7i11  
d3eyva1 d1d5i11 d4ffyl\_ d1tet11 d1a6wh\_ d1ac6a\_ d3dvfa\_ d1nfde1  
d1mimh1 d1ri8a1 d1jhlh\_ d3dura\_ d1fskb1 d1f97a1 d3so3b1 d2ak4d1  
d1lp9f1 d4z7wf1 d1l7th1 d4y5ya\_ d4x7ec1 d1emth1 d1ikf11 d1nlbh1  
d4utal1 d1bjma1 d1eapb1 d1u6ah1 d2dtgd1 d1kj2b\_ d1xeda1 d1c1eh1  
d1fgvh\_ d2bnub1 d2fb4h1 d2dtgb1 d1ktrh\_ d1jpth1 d1qkz11 d4hepg\_  
d2atpb1 d1flrh1 d2hrp11 d1mvfa\_ d1iaim1 d3k80a1 d2jb5h1 d3zkxc\_  
d4grwe\_ d1it9h1 d1rhhb1 d3w9ec\_ d1e4wh1 d1sy6h1 d2j6eh1 d3qxta\_  
d1jglh1 d1p7ka1 d1tzhb1 d4n8pa1 d1gaf11 d2jelh1 d1wioa2 d4i0cc1  
d1cicb1 d1lmka2 d1lmka1 d1iqwh1 d1orqb1 d1ejoh1 d1jnlh1 d4zga\_  
d43c9b\_ d1ggb11 d1wejh1 d3q6fa1 d1f3dj1 d3c6la1 d1bqlh1 d3p9wb\_

d1a3r11 d1h0db1 d2uzil\_ d1eo811 d1qfwl\_ d1n7m11 d1igja1 d1c5ch1  
d2a9mh\_ d1rmfh1 d1fj1b1 d4heme\_ d1ccza1 d1a5fh1 d1ogad1 d1dlfh\_  
d1qa9b\_ d1vgel1 d3qskb\_ d1sjxa\_ d4ozfg1 d1sq2n\_ d1qd0a\_ d1kcvh1  
d1c5db1 d3qcul1 d8faba1 d3bn9d1 d1mjuh1 d4y8dc\_ d7fabh1 d3dvgb1  
d1lo011 d1a6tb1 d1gigh1 d1kcrh1 d2hwz11 d1yjdc1 d3clfl1 d4krna\_  
d1dl7l\_ d1e6o11 d1mexh1 d3r0ma\_ d4kkna\_ d1fns11 d1loaqh\_ d1rzia1  
d1lucbh1 d1ncw11 d4b41a\_ d1nfdfl d2mpah1 d2d7t11 d4grwf\_ d4b5ea\_  
d1lk3h1 d3u79a\_ d4u3xa\_ d1ghfl1 d1bvkb\_ d1mcww1 d1b88a\_ d1jrhh1  
d32c2b1 d4wemb\_ d1dsfh\_ d1op3h1 d1cell1 d1iqda1 d1qoka1 d1qoka2  
d1qfuh1 d2crya1 d1ay1h1 d1oaql\_ d3ab0b\_ d1rur11 d1t4kb1 d1bz7b1  
d1n0xh1 d1for11 d1lucb1 d4w6yb\_ d43c9a\_ d2aabl1 d1tzia1 d4n1ca\_  
d1k6qh1 d3g9ab\_ d4tvsa1 d1igmh\_ d1pz5b1 d3dx9a1 d3wxwh\_ d1nakh1  
d1kcul1 d3eaka\_ d4qlra1 d1cr911 d1d9ka\_ d1f4xl1 d1deea1 d2i27n2  
d1c12a1 d2orbl1 d1j8hd1 d1mcph1 d1c5da1 d1kenh1 d1bd2e1 d1h5ba\_  
d4x7fc1 d3upaa\_ d1t3fa1 d1indh1 d2dtgc1 d4hc111 d1zv5a1 d4wgvb\_  
d1uwgl1 d4f37k1 d1aqkh1 d1vesa\_ d3zkqd\_ d1fpt11 d1lo4l1 d1knob1  
d3rrqa\_ d1ct8b1 d4orz\_ d1mlbb1 d4hgkc1 d1dqd11 d1bogb1 d4ozhe1  
d1dr9a1 d1i7za1 d1dn0b1 d1kell1 d1rzib1 d1ypzf1 d1wtla\_ d1hkfa\_  
d1fail1 d1figh1 d2vyre\_ d1sjva\_ d1ohqa\_ d1bfoa1 d1pkqb1 d1mjul1  
d1b4j11 d1nsn11 d2arjb1 d1p4bh\_ d4aj0a\_ d3nn8b\_ d2rcja1 d1f2xk\_  
d4v1dd\_ d1adqh1 d2eksa\_ d4k3ga\_ d1jfqh1 d1luweh1 d1frgh1 d4gftb\_  
d1uz8b1 d4n1ea\_ d1bm311 d1clol1 d3mcka1 d2vq1a1 d1ae6h1 d4aq1b1  
d1uj3b1 d1nbqa1 d1fh511 d2ck011 d2ywza\_ d1q7211 d4nbxb\_ d1hila1  
d4hzb1 d2j8811 d1zmya1 d1cd0a\_ d1a4ka1 d1psk11 d1a0qh1 d4krmb\_  
d1ncbh1 d2fbjh1 d1j8he1 d1i3ua\_ d1cf811 d1fe8h1 d2plya1 d1eeqa\_  
d2x89a\_ d1o10a\_ d2r0lh1 d1ub5a1 d1dfbh1 d3eyvb1 d4jdvb1 d4p2cg\_  
d2gsia1 d2agj11 d1u3ha1 d2h1ph1 d1rih11 d1fskc1 d1boga1 d2a7711  
d1osp11 d1qfoa\_ d3dwta\_ d2fx711 d1rz711 d3stba1 d1pkqa1 d1b6da1  
d1dzba2 d1dzba1 d1kj2a\_ d4l1ha\_ d1rzgb1 d1dqlh\_ d12e811 d1miel1  
d1jmaa\_ d1sbs11 d1fgnh1 d1f5811 d1mqkh\_ d1ndgb1 d3qeg11 d1iaii1  
d2aw2a1 d1tqbc1 d3fo2a1 d4dkaa\_ d1f8th1 d2g6011 d2ywy\_ d1uj3a1  
d1yc7a\_ d3bd3a\_ d4w6xb1 d1nmb1\_ d1i8ka\_ d1rjlb1 d1ypze1 d1p7kb1  
d1kxqe\_ d1gpoh1 d2z4qa1 d1w72h1 d1i9r11 d4qgya1 d4xt1c\_ d2qqnh1  
d1cica1 d3c08h1 d2cd0a\_ d2bdnh1 d1hnga1 d1mam11 d1nldh1 d1cr9h1  
d4lcih1 d3bkyh1 d3qg711 d1ai111 d1kxvc\_ d4iosd\_ d1l7ih1 d2x1qa\_  
d1ub6b1 d3k74b\_ d1libgh1 d1teth1 d1igya1 d1hxma1 d2x6ma\_ d2e71a\_  
d5e03a\_ d1qfwm\_ d2r0kh1 d1igjb1 d1rurh1 d1plgh1 d1mj8h1 d1yuhb1  
d3fmg11 d1rzfl1 d1emt11 d1ad9b1 d1igtb1 d1nlb11 d1d5ih1 d3k7ua\_  
d4ffyh\_ d1bwwa\_ d3dvga1 d1a6ta1 d1fgvl\_ d4qxgl1 d1mim11 d1jh11\_  
d2hffb1 d2hh011 d1qkzh1 d1l7t11 d1afvh1 d1iaii1 d2cjuh\_ d1um5h1  
d2ghwb2 d2ghwb1 d1kgce1 d2fgwh1 d1ikfh1 d1dvfd\_ d2i24n1 d2xtjb\_  
d1za3b1 d2yc1a\_ d2hh0h1 d2x1oa\_ d1bvka\_ d1rjla1 d5e7ba1 d1igta1  
d1i11b1 d2fb411 d1mvua\_ d1jpt11 d32c2a1 d1fvca\_ d1iqdb1 d2hrph1  
d2p4ab\_ d4qo1a\_ d1p2cb1 d1wt5c\_ d1t4ka1 d5c1mb\_ d1it911 d1bz7a1



d1b2wh1 d1e4wl1 d1jnl11 d1yedb1 d1za6b1 d3u7aa\_ d1igfh1 d3gnml1  
d1orsa1 d1wejl1 d1a2ya\_ d1hxmb1 d1gafh1 d2j4wh1 d1pz5a1 d1j05a\_  
d1a3rh1 d4fq1l1 d1qfwh\_ d1eo8h1 d1n7mh1 d4s11a\_ d1kegh1 d5da4a\_  
d1iqw11 d3whxb1 d1vgeh1 d1deeb1 d1c12b1 d1t2ql1 d1ad9a1 d3gsnb1  
d3b2uc1 d1ggbh1 d1t3fb1 d1nakl1 d4ocmc\_ d1lila1 d2v7hb3 d2esve1  
d1mcoh1 d2qr0b1 d2q3aa\_ d1ct8a1 d1kcr11 d2pxyb\_ d2uzih\_ d5c3ld\_  
d3durb\_ d2ak4e1 d1d17h\_ d1xiwd\_ d1mlba1 d1rmfl1 d1i7zb1 d1dlfl\_  
d2xa3a\_ d5bq7b1 d1dqqb1 d3h42l1 d1legjh1 d1kcvl1 d1fe8l1 d2j6el1  
d1f3rb2 d1l1k3l1 d1sm3h1 d1q0xh1 d1ghfh1 d7fabl1 d1igch1 d1lo0h1  
d4idla\_ d5c2b1\_ d1jrh11 d1i11a1 d3zhda1 d4kfzc\_ d1b0wa\_ d1e6oh1  
d1mex11 d4krpb\_ d1fnsh1 d1ncwh1 d4hgma\_ d4eigb1 d4rzca\_ d2mpa11  
d4y5xa\_ d5en2b1 d3lrga1 d4ej1c1 d1rhha1 d1j05b\_ d1forh1 d1q9wb1  
d2wzpd\_ d2aq2a1 d1h0da1 d3revb1 d2ij0c1 d1tzha1 d4m7j11 d1k6ql1  
d3b9kc1 d1igml\_ d3qeua1 d1dsfl\_ d1celh1 d1kcuh1 d1zvha1 d1zvoa1  
d1tqbb1 d1ay1l1 d2qsc11 d2cgrh1 d1n10h1 d1ken11 d3eo0a1 d4n9ob1  
d1n0xl1 d3k1kc\_ d2m9wa1 d3dfxa\_ d2aq2b1 d1ck1a1 d1lenfa1 d1i4pa1  
d1v1oa1 d1et9a1 d1esfa1 d2g9hd1 d4ohja1 d1klud1 d1bxta1 d1eu3a1  
d1ty0a1 d1fnua1 d2cqva1 d1fhga\_ d2k1ma\_ d2dl2a1 d1biha3 d1biha1  
d1biha4 d3qp3a1 d1g1ca\_ d1gxea\_ d1cvsc2 d1cvsc1 d1xmwa2 d1m4ka2  
d2otpa2 d1biha2 d1rhfa2 d2fcba2 d2fcba1 d1wwbx\_ d1gsma2 d1epfa1  
d1epfa2 d2dava1 d1waaa\_ d1f97a2 d1x44a1 d1vcaa2 d1fnla2 d1fnla1  
d3b5ha2 d3h8na2 d3h8na1 d1jbja1 d1jbja2 d1pd6a\_ d1f2qa2 d1f2qa1  
d3cx2a\_ d1nbqa2 d3b5ha1 d1n26a1 d1xiwb\_ d1xaua\_ d1fltx\_ d2ifga1  
d1olla1 d1olla2 d1cs6a4 d1cs6a3 d1cs6a2 d1cs6a1 d2gw5a2 d1sy6a1  
d1xiwa\_ d1lucta2 d1lucta1 d1ry7b2 d1gl4b\_ d1qz1a3 d1olza1 d2c9aa1  
d1wwca\_

**Family-55 (c.2.1.7)**

**Positive dataset contains 6 protein sequences.**

d3t4ea2 d2hk9a2 d2egga2 d3dona2 d1vl6a1 d1v9la1

**Negative dataset contains 3783 protein sequences.**

d1m32a\_ d1libja\_ d1iuga\_ d4q75a\_ d2bkwa1 d1t3ia\_ d1n8pa\_ d1qz9a\_  
d1jf9a\_ d1eg5a\_ d1p3wa\_ d3kgwa\_ d1c11a\_ d2ctza1 d1vjoa\_ d2rfva\_  
d1gc0a\_ d1cs1a\_ d1d2fa\_ d2ch1a1 d1qgna\_ d1pffa\_ d1elua\_ d1c7ga\_  
d2v1pa1 d2ez1a\_ d1u08a\_ d1lc5a\_ d1b5pa\_ d2ay1a\_ d1bw0a\_ d3pd6a\_  
d7aata\_ d2csta\_ d1j32a\_ d1fg7a\_ d4wlha\_ d1v2da\_ d1gdea\_ d1m6sa\_  
d1v72a1 d1svva\_ d1ajsa\_ d1wsta1 d2f8ja2 d1lk9a\_ d1vp4a1 d1xi9a1  
d2gb3a1 d1yaaa\_ d3rcha\_ d3k40a\_ d1pmma\_ d2cfba1 d1dfoa\_ d1o69a\_  
d1bj4a\_ d3k28a\_ d2bwpa\_ d3lg0a\_ d2fnua\_ d3ou5a\_ d1z7da1 d1b9ha\_  
d4msoa\_ d1bs0a\_ d1s0aa\_ d1sffa\_ d3tqxa\_ d1mdoa\_ d3qboa\_ d3pgya\_  
d1bjna\_ d2dkja\_ d1ejia\_ d1vefa1 d4wxga\_ d3bs8a\_ d3gbxa1 d1w23a\_  
d4nmwa\_ d1i26a\_ d3lgia\_ d3i77a\_ d2z9ia2 d4nsva\_ d1lcya2 d4jcna\_  
d1agja\_ d1os8a\_ d1hpga\_ d1p3ca\_ d1qtfa\_ d1ddla\_ d1e57b\_ d1f56a\_  
d1bypa\_ d1lazca\_ d1ws8a\_ d3u25a\_ d1cuoa\_ d1id2a\_ d1rkra\_ d2iaac\_  
d4dp1x\_ d1nwpa\_ d2gima\_ d2i7sa\_ d1qhqa\_ d3ehbb1 d1fft11 d1gyca3

d1hfua2 d1kbva1 d1kbva2 d1sdda1 d1sdda2 d1gyca1 d1gyca2 d1mzya1  
d2bw4a1 d1aoza1 d1aoza3 d1aoza2 d1kyaa2 d1kyaa1 d1mzya2 d4e9sa1  
d1sddb1 d1sddb2 d1hfua1 d1hfua3 d1oe1a2 d1oe1a1 d1v10a2 d1v10a3  
d1v10a1 d2dara2 d2dara1 d1wyha2 d2dloa2 d1rutx4 d1rutx3 d2cuqa2  
d1x41a2 d1x41a1 d1x3ha2 d1x3ha1 d2d8za1 d1x61a2 d1x6aa1 d1x6aa2  
d2cora2 d2cora1 d1v6ga1 d1v6ga2 d2d8za2 d1x64a1 d1x64a2 d1b8ta1  
d2co8a1 d1x63a2 d2dj7a2 d2dj7a1 d2cu8a2 d2cu8a1 d1g47a1 d1j2oa1  
d1wyha1 d2dloa1 d1wiga1 d1wiga2 d2cupa2 d2cupa3 d1x68a1 d2d8ya2  
d2d8ya1 d1m3va2 d1x62a1 d1x68a2 d1x61a1 d1b8ta3 d1b8ta2 d2d8xa2  
d2d8xa1 d1x4ka1 d1x4ka2 d2cuqa1 d1m3va1 d2co8a2 d1j2oa2 d1x63a1  
d2cura1 d2cura2 d1x62a2 d1a3qa1 d1iknc\_ d3brda1 d1oy3c\_ d1imhc1  
d1gjia1 d1zk9a1 d2cxka1 d4qgna\_ d1vr3a1 d2bema\_ d1pama1 d1lea9c1  
d2fhfa2 d2fhfa1 d1k3ia1 d1j0ha1 d1csla1 d2bhua1 d1ledqa1 d1f1sa2  
d1ut9a2 d1gvia1 d1txka1 d4alac\_ d1pjwa\_ d1rera1 d1s6na\_ d3uzqb\_  
d2ph1a2 d1fxza2 d1fxza1 d1lrha\_ d1uija1 g1dgw.1 d2v09a\_ d1uika2  
d1uika1 d1dgwa\_ d1ep0a\_ d2pa7a1 d1wlta1 d2c0za1 d1fstb\_ d1lex0a1  
d1tafa\_ d1bh9b\_ d1tafb\_ d1jfib\_ d1h3ob\_ d2byka1 d1n1ja\_ d4g92b\_  
d1bh9a\_ d1jfia\_ d1h3oa\_ d2bykb1 d1n1jb\_ d1r0ka3 d1j5pa3 d1vkoa2  
d1vm6a2 d3qvsa2 d1gr0a2 d1p1ja2 d2ovga\_ d1sq8a\_ d1rzsa\_ d3kz3a\_  
d3orca\_ d3gpdg2 d2q49a2 d1hdgo2 d2g17a2 d2cvoa2 d2czca1 d3pwka2  
d1obfo2 d1i32a2 d1zyao2 d2pkqo2 d1b7go2 d2hjsa2 d1cf2o2 d1vkna2  
d1nvm2 d4lt9a1 d3tc7a1 d3hoja\_ d1i4na\_ d3vnda\_ d3n18a1 d1geqa\_  
d3nav1 d1v5xa\_ d4a2ra1 d3tc6a1 d1ujpa\_ d4ijba\_ d1xcfa\_ d1vc4a\_  
d1rd5a\_ d1qopa\_ d3b5va\_ d2msya\_ d2djoa1 d2r5za\_ d1au7a1 d1f43a\_  
d2lmda1 d1akhb\_ d1s7ea1 d3nara\_ d1zq3p1 d2craa1 d1mija\_ d4uuta\_  
d3a01a\_ d1x58a1 d3rkqa1 d3cmya1 d2cqxa1 d2da6a1 d1e3oc1 d1fjla\_  
d1mh3a1 d1ig7a\_ d1x41a1 d1wh7a1 d1gt0c1 d2mw8a\_ d1x2ma1 d1b72a\_  
d1wi3a1 d1jgga\_ d1wjha1 d1x2na1 d1mnm\_ d2cuea1 d3k2aa\_ d2hosa\_  
d2jwta2 d1pufa\_ d1oetc1 d2hi3a\_ d1b8ia\_ d4j19a\_ d3lnqa\_ d1wh5a1  
d1b8ib\_ d1fexa\_ d2cqra1 d1guua\_ d1ug2a1 d2cqqa1 d2ajea1 d4a69c\_  
d1h8ac1 d2crga1 d2iw5b1 d1xc5a1 d1ofcx1 d2cu7a1 d1wgxa1 d2cjja1  
d2ckxa1 d1gvda\_ d1igna1 d2iu5a1 d1zk8a1 d2g7sa1 d2fd5a1 d2np5a1  
d1z0xa1 d2id6a1 d2d6ya1 d2i10a1 d1vi0a1 d2oi8a1 d3c07a1 d2ns7a1  
d2fq4a1 d2yvea1 d1t33a1 d2o7ta1 d2np3b1 d2g7ga1 d2gena1 d2fbqa1  
d2g7la1 d2gfna1 d2g3ba1 d2jj7a1 d2hyja1 d1sgma1 d1ui5a1 d2hkua1  
d2id3a1 d4jyka1 d3lv8a\_ d1s3ga1 d1zaka1 d1s4qa\_ d3tvta2 d1uf9a\_  
d1khta\_ d1ckea\_ d1osna\_ d1p5zb\_ d3cm0a\_ d1tmka\_ d1jaga\_ d3h86a\_  
d1t0hb\_ d1nn5a\_ d2h92a\_ d3kb2a1 d2c95a1 d1yj5a2 d1kgda\_ d1ly1a\_  
d2ak3a1 d1vyva2 d1deka\_ d2grja1 d1p3ja1 d1y63a\_ d1e4ya1 d1s96a\_  
d3iija1 d1lvga\_ d1nksa\_ d1vyua2 d4e22a\_ d1qf9a\_ d1jjva\_ d1q3ta\_  
d1ki9a\_ d1lw7a2 d1teva\_ d1kjwa2 d1gsia\_ d1x6va3 d1g3ma\_ d1j99a\_  
d1t8ta1 d1nsta\_ d1fmja\_ d1zrha\_ d1ls6a\_ d2a3ra\_ d2zptx\_ d3ckla\_  
d1texas\_ d1q44a\_ d2gwha\_ d1uj2a\_ d4gi7a\_ d2jeoa1 d1rz3a\_ d1z0ja1  
d3umra2 d3gj0a1 d2gaoa1 d1yzga1 d1x3sa1 d1g7sa4 d1puja\_ d1ludxa2

d1kk1a3 d2o52a\_ d1jwyb\_ d1zcaa2 d1zcba2 d2fv8a1 d2cjwa\_ d3dz8a1  
d1xzpa2 d1vg8a\_ d4qxaa\_ d2ew1a1 d1x1ra1 d2bcgy\_ d3doea1 d3cona\_  
d3rega\_ d3wyga\_ d1upta\_ d2b6ha1 d1zd9a1 d1r5ba3 d1n0ua2 d1r2qa\_  
d2f91a1 d2rhda\_ d3q3jb\_ d3q85a\_ d1efma1 d1r8qa\_ d2gf9a1 d2akab1  
d1ek0a\_ d1z08a1 d2gcoa1 d2dy1a2 d4g01b\_ d2cxxa1 d1svia\_ d3q72a\_  
d1ni3a1 d4ac9a4 d2erxa1 d2bmea\_ d1wxqa1 d2gf0a1 d41dja1 d1zunb3  
d1d5ca\_ d41v5b\_ d1efca3 d1kmqa\_ d2g6ba1 d3lrpa\_ d1tada2 d2y8ea\_  
d4rd4a1 d1z06a1 d2heia\_ d3a58b\_ d1u01a2 d1d2ea3 d1zj6a1 d2ocba\_  
d3rwoa\_ d1mr3f\_ d2e9sa1 d4u5xa1 d2iwra\_ d2fn4a1 d3bwdd\_ d2nzja1  
d2atva1 d2ksqa\_ d3143a\_ d1mkya2 d1mkya1 d1wmsa\_ d1jnya3 d2rmka\_  
d1f6ba\_ d1f60a3 d1gota2 d1jala1 d2fh5b1 d1g16a\_ d2wblc\_ d1m7ba\_  
d1wf3a1 d1f5na2 d1t9ha2 d1z6xa1 d1z0aa1 d2fg5a1 d2a5ja1 d2bcjq2  
d1s0ua3 d1ky3a\_ d4y0va\_ d4lhwa\_ d2qmea1 d2atxa1 d1legaa1 d1ryha\_  
d1moza\_ d1nrjb\_ d2erya1 d3bfka\_ d1puia\_ d1fzqa\_ d3j3az1 d3t5ga\_  
d1shza2 d3defa\_ d2f7sa1 d3raba\_ d3tsoa\_ d3aq4a\_ d2a17a1 d3sfva1  
d3bcla\_ d1sdma\_ d3h4sa1 d2heha\_ d2grya\_ g3kin.1 d1kk8a2 d1br2a2  
d1goja\_ d1f9va\_ d2mysa2 d1lkxa\_ d3t0qa\_ d4db1a1 d3gbja\_ d1ry6a\_  
d1v8ka\_ d1k8ka2 d1k8ka1 d3uleb1 d3i33a2 d3i33a1 d1bupa1 d1dkgd2  
d1dkgd1 d4ci6a2 d1jcfa1 d4a2ba2 d2fxua1 d1yaga1 d4cbua2 d1bupa2  
d1iqca2 d1iqca1 d1eb7a2 d1eb7a1 d1nmla1 d3h3no1 d3h3no2 d3ezwa2  
d1hroa\_ d4gedb\_ d3zooa\_ d1mz4a\_ d1gu2a\_ d1f1fa\_ d1dvva\_ d1c6ra\_  
d1c75a\_ d1e29a\_ d1gdva\_ d1cnoa\_ d1h32b\_ d1co6a\_ d2bh4x\_ d2aiua\_  
d5cytr\_ d1jdla\_ d1i8oa\_ d2zboa\_ d3dmia\_ d1ls9a\_ d1wvec\_ d2yk3a\_  
d3ph2b\_ d1dw0a\_ d5aura\_ d1ql3a\_ d1qn2a\_ d1f1ca\_ d2nqya\_ d1h4ga\_  
d1oa2a\_ d1olra\_ d3b7ma\_ d4h7ma1 d3wp3a\_ d2vgda\_ d1ligoa\_ d3zsea\_  
d2nlra\_ d3wx5a\_ d1oa3a\_ d1pvxa\_ d1m4wa\_ d1f5ja\_ d1oa4a\_ d1ks5a\_  
d4ix1a1 d3sita1 d2ah2a1 d1evsa\_ d1cnt1\_ d1pvhb\_ d1z7ca\_ d1huwa\_  
d1bgea\_ d1rhga\_ d1f6fa\_ d1f45b\_ d1i1rb\_ d1axia\_ d1letea\_ d3tgxb\_  
d1scfa\_ d2z3qa1 d3qb1a\_ d1hula\_ d1m48a\_ d4nkqb\_ d1leera\_ d1v7mv\_  
d5e4ea\_ d2o27a\_ d3b5ka\_ d2psma1 d4zf7a\_ d3uf5a\_ d4x51a\_ d1d9ca\_  
d4ypgc1 d3oq3a\_ d1lqsl\_ d1n1fa\_ d1aula\_ d1wu3i\_ d3bes1\_ d3ux9a\_  
d4dnxa2 d1v47a2 d1g8fa2 d1jhda2 d1x6va2 d2e17a\_ d1iq0a2 d1irxa2  
d1r6ta2 d1ivsa4 d2cyba\_ d1rqga2 d1j09a2 d2yxna\_ d1f7ua2 d1h3fa1  
d1ffya3 d2g36a1 d1nzja\_ d1jila\_ d1n3la\_ d1i6la\_ d1pfva2 d1h3na3  
d3n9ia\_ d3sz3a1 d3sw2a\_ d1moxc\_ d1dx5i3 d1edmb\_ d1autl2 d1autl1  
d1nqlb\_ d1dval1 d1szba2 d1kigl\_ d2y5f1\_ d1ijqa2 d1gk5a\_ d1g1sa2  
d1nt0a3 d1xdtr\_ d1lmja2 d1lmja1 d1nzia2 d2wphe\_ d1klil\_ d1pfxl2  
d1pfxl1 d1p9ja\_ d1g1ta2 d1f7ea\_ d4yzub\_ d1lr7a1 d2mgpa1 d1b9wa1  
d2mgpa2 d1obl1c1 d1obl1c2 d1n1ia2 d1n1ia1 d2npra2 d2npra1 d2y5ia\_  
d1qlsa\_ d1psra\_ d3n22a\_ d2egda\_ d4ggfc\_ d2wcea\_ d2luca\_ d4aqia\_  
d3nsia\_ d2lp3a\_ d1j55a\_ d1a4pa\_ d1k8ua\_ d1nsha\_ d1pvaa\_ d3fs7a\_  
d2pvba\_ d1ttxa\_ d1rwya\_ d2kyfa\_ d1rk9a\_ d1a75a\_ d1lexra\_ d1tiza1  
d1nyaa\_ d1g8ia\_ d1ggwa\_ d1wdcc\_ d3fwba\_ d1ggza\_ d2o5ga\_ d1ctaa\_  
d1m45a\_ d3i5gc\_ d1s18a\_ d1fpwa\_ d2scpa\_ d2roaa\_ d4aqra\_ d3pn7b\_

d1br1b\_ d2mysb\_ d1s6ca\_ d1bjfa\_ d2obha\_ d1jfka\_ d1jf0a\_ d1qv0a\_  
d1lkja\_ d2mlfc\_ d2m97a\_ d2d8na\_ d4by5a\_ d1jbaa\_ d4nqga\_ d1wdcb\_  
d2mysc\_ d1j7qa\_ d1s6ia\_ d1uhka2 d1r2ua\_ d1dtla\_ d3kf9a\_ d3pn7c\_  
d1qjta\_ d1fi6a\_ d1c07a\_ d5d67d\_ d1tuza\_ d1h8ba\_ d1leg3a1 d1leg3a2  
d2zkmx1 d1snla\_ d1gjya\_ d1y1xa\_ d1dvia\_ d1df0a1 d1qxp2 d4usla\_  
d1k94a\_ d1wkya2 d1uuqa\_ d3wh9a\_ d4m1ra\_ d1xyza\_ d4xuya\_ d2je8a5  
d4bf7a1 d3cuia\_ d1ur4a\_ d1qw9a2 d1odza\_ d2vzsa5 d1bqca\_ d2x2ya1  
d1hjqa\_ d1qnra\_ d4y7ea1 d1vjza\_ d4k68a\_ d2v3ga\_ d4hpga\_ d1nofa2  
d1nq6a\_ d1h4pa\_ d1aq0a\_ d3ziza\_ d4bs0a\_ d1h1na\_ d1ta3b\_ d1w91a2  
d1i1wa\_ d1uhva2 d1us3a2 d1egza\_ d7a3ha\_ d1tvna1 d3nyda1 d1ghsa\_  
d2cyga1 d4xv0a\_ d2c8na2 d1w32a\_ d3emca\_ d1v6ya1 d1foba\_ d2uwfa1  
d2fgla\_ d3niya1 d2c0ha1 d1rh9a1 d1yq2a5 d1szna2 d1fa2a\_ d1pama4  
d5do8a1 d1ea9c3 d1hx0a2 d2fhfa5 d1qhoa4 d1avaa2 d1m53a2 d4m8ua1  
d2gjpa2 d1lwha2 d4howa1 d1ktba2 d1j0ha3 d3vm5a1 d2x1ia\_ d1wzaa2  
d1uasa2 d2diea1 d1mxga2 d1ht6a2 d1iv8a2 d5cpsa\_ d1ud2a2 d1zjaa1  
d3gbea1 d1kwga2 d1wdpa\_ d1gcy2 d1g5aa2 d1hvxa2 d3dhpa2 d2bhua3  
d4do4a1 d3qgva1 d1e43a2 d1g94a2 d2d3na2 d1gjwa2 d1gvia3 d1x1na1  
d1r7aa2 d1tz7a1 d4c7ga2 d2gjxa1 d1nowa1 d1yhta1 d4toqa\_ d1wb0a1  
d1w9pa1 d1eoka\_ d1itxa1 d1kfw1 d1edqa2 d2gsja\_ d1hjxa1 d1jnda1  
d1vf8a1 d3wdpp1 d3wq5a\_ d1gnxa\_ d4gxpa\_ d4hz8a\_ d3aiua\_ d1wcga1  
d1qvba\_ d3ahxa\_ d1v02a\_ d2dgaa\_ d1pbga\_ d1vffa1 d1qoxa\_ d4ha4a\_  
d1mixa2 d1e5wa2 d1j19a2 d2a16b2 d3syxa1 d1mkea1 d2p8va\_ d1xoda1  
d1evha\_ d1qc6a\_ d1legxa\_ d1b9ra\_ d1offa\_ d1frra\_ d3wcqa\_ d1e9ma\_  
d1l5pa\_ d1wria\_ d1i7ha\_ d3av8a\_ d1czpa\_ d1rfka\_ d3p1ma1 d3b2ga\_  
d2bt6a2 d1wgqa1 d1v89a1 d2coda1 d1zc3b\_ d1wg7a1 d1u5ea1 d1v61a1  
d2coca1 d2ys1a1 d1v5pa1 d1ntya2 d1wjma1 d1wila1 d1u29a\_ d1xx0a1  
d1unqa\_ d2zkmx3 d1fhoa\_ d1v88a1 d2adza1 d1x1fa1 d1p6sa\_ d2coaa1  
d1btka\_ d1v5ma1 d1faoa\_ d2x18a\_ d1dyna\_ d1x1ga1 d4kaxb\_ d2j59m1  
d1xcga2 d1txda2 d1u5da1 d1dbha2 d1wlha\_ d1upqa\_ d1v5ua1 d1foea2  
d2fjla1 d1eaza\_ d2dfka2 d2cofa1 d1kz7a2 d1etob\_ d1umqa\_ d1g2ha\_  
d1r55a1 d3gboa\_ d1atla\_ d1kufa\_ d1buda\_ d4q1la\_ d1quaa\_ d1yp1a\_  
d1wnia\_ d2gfoa1 d1vjva\_ d2ayna1 d3nhea\_ d3u1ra1 d1g9ka2 d1kapp2  
d3ioqa\_ d1fh0a\_ d1o0ea\_ d1khqa\_ d1m6da\_ d2cb5a\_ g8pch.1 d1s4va\_  
d2pnsa\_ d1vsna1 d1mira\_ d1iwda\_ d2oula\_ d7pcka\_ d3bwka\_ d3bcna\_  
d2p86a\_ d1pvja\_ d1pcia\_ d1gece\_ d1deua\_ d4bs6a\_ d1xkga1 d1cqda\_  
d1jqpa2 d2c0ya\_ d2bdza\_ d3p5ua\_ d2o36a\_ d1k9xa\_ d1ex4a2 d1c6va\_  
d2jk6a2 d2jk6a1 d1feca1 d1feca2 d1lpfa1 d1lpfa2 d1xhca1 d1xhca2  
d1dxla2 d1dxla1 d1gera2 d1m6ia2 d1onfa1 d1onfa2 d3lada2 d3lada1  
d1w4xa1 d1w4xa2 d1gesa2 d1mo9a1 d1xdia1 d1fl2a2 d1fl2a1 d1fcda1  
d1fcda2 d1h6va2 d1h6va1 d1mo9a2 d1gv4a2 d1gv4a1 d2gv8a2 d2gv8a1  
d1aoga1 d1aoga2 d1hyua1 d1ebda1 d1ebda2 d3dk9a1 d1q1ra2 d1q1ra1  
d1gesa1 d1zbf1a1 d2z1ha\_ d2etja1 d3qioa1 d1j11a\_ d2e41a\_ d1j12a\_  
d2l1sna1 d1io2a\_ d1uaxa\_ d2yv0x\_ d1mu2a1 d1i39a\_ d1pn0a1 d1reoal  
d1ju2a1 d2f5va1 d3c96a1 d2gmha1 d1gpea1 d1o5wa1 d1n4wa1 d1k0ia1

d2dw4a2 d2ivda1 d1seza1 d2voua1 d1kdga1 d1s5ja1 d2hbja2 d2igia\_  
d1wlja\_ d1qhta1 d4dlea1 d1tgoa1 d2f96a1 d3tr8a1 d3mxma\_ d1q8ia1  
d1y97a1 d1w0ha\_ d1kfsa1 d2py5a1 d1noya\_ d1d5aa1 d1yt3a3 d2guia\_  
d3mwpal d4kb1a\_ d1liv0a\_ d1nu0a\_ d3nvva1 d1krha3 d2h88b1 d1n62a2  
d1t3qa2 d1kf6b2 d1zoyb1 d1ffva2 d1dgja2 d1rm6c2 d1jmx2 d1jmx1  
d1pbya1 d1r7ha\_ d1faaa\_ d1wika1 d1xfla\_ d1ttza1 d2f51a1 d1ti3a\_  
d1nhoa\_ d1sena\_ d2i4aa\_ d1ep7a\_ d1zmaa1 d1fo5a\_ d3lefa1 d3diea1  
d2yana1 d1z6na1 d1oaza\_ d3zywa1 d4aj8a\_ d1nm3a1 d4fiwa\_ d1wmja\_  
d4hs1a1 d1liloa\_ d1xwaa1 d1wjka1 d2vmla\_ d1fb6a\_ d1gh2a\_ d1h75a\_  
d1nw2a\_ d1kx5b\_ d3a6na\_ d4m6ba2 d2nqbd\_ d3wkjd\_ d2yfwe\_ d4h9na\_  
d5bnxa\_ d1kx5c\_ d3r45a\_ d1eqzb\_ d4jjnb\_ d1f66c\_ d1eqza\_ d4wnnb\_  
d1kx5a\_ d1u35c1 d1id3a\_ d2nqbc\_ d1kx5d\_ d2b5ea2 d2b5ea3 d2b5ea1  
d2b5ea4 d2kp1a1 d2kp2a1 d1hyua3 d1hyua4 d1j08a1 d1pd212 d1nhya2  
d2a2ra2 d1k0dd2 d1f2ea2 d1gsua2 d1f3ba2 d2fhea2 d2pvqa1 d1tw9a2  
d1oyja2 d1e6ba2 d1k0ma2 d3ik7a1 d4is0a1 d1r5aa2 d1jlva2 d1m0ua2  
d3gtub2 d1z9ha2 d1okta2 d1axda2 d2gsra2 d1tu7a2 d1k3ya2 d1zgm1  
d1b48a2 d1gnwa2 d1gwca2 d2gsta2 d1glqa2 d1oe8a2 d1pn9a2 d1v2aa2  
d1fw1a2 d1duga2 d1ovna2 d1lig8a1 d1czan3 d1czan1 d1lig8a2 d1czan4  
d1bg3a4 d1bg3a3 d1bg3a2 d1bg3a1 d1nira1 d1qksa1 g1f8v.1 d1novc\_  
d2bbvc\_ d3wyha\_ d4g9sa1 d3gxra\_ d1qqya\_ d1f6ra\_ d1livma\_ d2gv0a\_  
d1iiza\_ d2z2fa\_ d1j8xa\_ d1ghla\_ d1b9oa\_ d1741a\_ d1691a\_ d2o4wa\_  
d1p37a\_ d1k28a3 d1xjta1 d1jtma\_ d2f2qa\_ d4e97a1 d3w3ea\_ d4tx7a\_  
d3cq1a\_ d4msta\_ d3iwra\_ d2z37a\_ d4dyga\_ d2k4ua\_ d1hp2a\_ d2lu9a\_  
d1baha\_ d2meoa1 d1wm7a\_ d1hlya\_ d1n8ma\_ d1jlza\_ d1wpda\_ d1c55a\_  
d1pvza\_ d1wt7a\_ d1rjia\_ d1wz5a\_ d1m2sa\_ d1pjva\_ d1c49a\_ d1qkya\_  
d2ktca1 d1wmta\_ d1du9a\_ d1j5ja\_ d1r1ga\_ d2pjsa1 d1klla\_ d2i7ra1  
d1ecea\_ d1xqaa1 d5cj3a1 d1npba\_ d1jifa\_ d2p7oa\_ d1nkia\_ d1mpya2  
d1kw3b2 d1kw3b1 d4ghga1 d1tfza1 d3isqa1 d3isqa2 d1sqia1 d1sqia2  
d1lkda2 d1lkda1 d1mpya1 d1cjxa2 d1cjxa1 d1sp9b2 d1t47a1 d1t47a2  
d1flua2 d1sp8a1 d1sp8a2 d1flua1 d1iyka2 d1iyka1 d1rxta1 d1iica2  
d1qsta\_ d2beia1 d4m3sa\_ d1u6ma1 d1ygha\_ d1yk3a1 d3dr6a\_ d1xmta\_  
d1z4ea1 d2ge3a1 d1bo4a\_ d2fiaa1 d2jdca1 d1y9wa1 d3to7a\_ d1wwza1  
d2f14a1 d2ozua1 d2b5ga\_ d2cy2a1 d2p0wa\_ d1cm0a\_ d4pswa\_ d1yreal  
d1yr0a1 d1m4ia\_ d2gana1 d1yvka1 d1ghea\_ d2g3aa1 d1y7ra1 d2euia1  
d1q2ya\_ d2fsra1 d1xeba\_ d2ae6a1 d1cjwa\_ d1qsma\_ d2aj6a1 d1y9ka1  
d1i12a\_ d1vkca\_ d2atra1 d1n71a\_ d2d4pa1 d2fiwa1 d2fe7a1 d1tiqa1  
d2ou2a\_ d1yx0a1 d2fcka1 d1p0ha\_ d2j8ma\_ d2pq8a\_ d1z4ra1 d1s3za1  
d1ufha\_ d2hqya1 d2hqya2 d1lrza2 d1lrza3 d1ne9a2 d1xvqa1 d1pn0a2  
d3hy2a\_ d2cvba1 d1o8xa\_ d1lu4a\_ d1we0a1 d2bmx1 d2a4va1 d1psqa\_  
d1xiya1 d1q98a\_ d1n8ja\_ d1zofa1 d2ggta\_ d3tjja\_ d4je1a1 d1o73a\_  
d3s9fa\_ d2zcta\_ d1qmva\_ d1jfua\_ d2b1ka\_ d5dvba1 d2b5xa1 d2v2ga\_  
d1st9a\_ d3tb2a\_ d41lra\_ d4fh8a1 d1knga\_ d2h30a\_ d1i5ga\_ d2z9sa\_  
d2f8aa1 d1tp9a1 d2b7ka\_ d1nm3a2 d3hvva\_ d2wfca1 d4kcea\_ d1xvwa1  
d4gqca1 d3qpma\_ d4k1fa\_ d1zsoa1 d1gp1a\_ d1prxa\_ d4od7a1 d1z6ma1

d4mcua1 d4dvca1 d1r4wa\_ d3l9sa\_ dlun2a\_ d3rppa\_ dlrw1a\_ dlz3ea1  
d3l78a\_ d2qked\_ d4ksoa\_ d1t4za1 dlwaja\_ d1e88a1 dl16ja5 dl16ja4  
d1eaka4 d1eaka3 dl16ja3 dlh8pa2 d1etha2 dlw52x1 d2ppla1 dlhpla2  
d2oxea1 dlbu8a2 dlrp1a2 dlysl\_x\_ d4hs9a\_ dlispa\_ dlku0a\_ d3qmma\_  
dlra6a\_ dlmuka\_ d3gsza\_ dlkhva\_ dlte9a\_ d2xwha\_ d3uqsa\_ d3hkwa\_  
d3n6ma\_ d2cjqa\_ d2xyma\_ dlteba\_ dlte8a\_ d1s48a\_ d1u09a1 d4wfxa\_  
d3tyqa\_ d2pgga1 dl1gya\_ d4l3wa\_ dl1lfa\_ dlgz7a\_ dlukca\_ dljlia\_  
d2rhwa\_ d3groa\_ dlpjaa\_ dlthta\_ dlsvpa\_ dlmbma\_ d3su6a1 dlcula1  
d4agka\_ dlvcpa\_ dlq31a\_ gln1l.1 d3e90b\_ dllep5a\_ d3u1jb\_ dlxwdc1  
d3kj4a\_ dlw8aa\_ d2ifga3 dlp9ag\_ dlxkua\_ dlgl2a\_ dlzka\_ d4tlja\_  
d2a2ua\_ d4wfva\_ d3t1da\_ d4iaxa\_ d3zq3a\_ d2nnda\_ dli4ua\_ dlkxoax\_  
dlbbpa\_ dlkt7a\_ dllexsa\_ d3s26a1 dl1f7a\_ dlqfta\_ d4gh7a\_ dlz24a1  
dlqabe\_ dlxkia\_ dlw3a\_ d3bx7a\_ d4iawa1 dlno0sa\_ dlgkab\_ d3kzaa\_  
d2k23a\_ d2l9ca1 d2joza1 dlgm6a\_ d3kffa\_ d3saoa1 dlw5pa\_ dlwupa1  
dl1iua\_ d2tbvc\_ dlc8nc\_ dlx36a\_ dlsmvc\_ dlng0c\_ d4sbvc\_ dlwopa\_  
dlf2nc\_ dlcixa\_ dlw29a\_ dlw7fa\_ d2jtba\_ dl1d1ha\_ dlw9pa\_ dlwupa\_  
dlqk7a\_ dlmb6a\_ d2a2va\_ dl1niya\_ dl1i25a\_ d2mpqa\_ dlw6a\_ dlkqha\_  
dl1a4a\_ d2mxoa1 dl1d10a\_ dlkoza\_ dlqk6a\_ dlwma\_ dl1qra\_ dlc6wa\_  
dlrmka\_ dl1xta\_ dlwyoa\_ dlcnna\_ dl1fu3a\_ dlglpa\_ dl1f3ka\_ dlrypd\_  
dl1rua\_ dlrypc\_ d3unfk\_ dlrypa\_ dlj2pa\_ dl1rui\_ dlj2qh\_ d3unfh\_  
dlm4ya\_ dlrypb\_ dl1rul\_ dl1rug\_ dl1ru2\_ dlq5rh\_ dlrypg\_ dlw3ka\_  
dl1ruf\_ dlq5qa\_ dlw94a\_ dl1rub\_ dlryph\_ d3ty6a\_ dl1ruj\_ dl1ruk\_  
dl1rype\_ dl1rud\_ dl1rue\_ d3mi01\_ dlrypf\_ dl1ruh\_ d2z3ba\_ dl1ruc\_  
d3mka2\_ dl1rul\_ dl1ny721 dl1ny722 dl1a6ca3 dl1a6ca2 dl1a6ca1 dlpgl22  
dlpgl21 dlpgl11 dlmqta\_ dl1d4m3\_ dl1fmd3\_ d2mev1\_ glaym.1 dlw13\_  
d4q4w1\_ dl1ra3\_ d2x5ia\_ dl1rhi1\_ gl1ra.1 gl1d4m.1 gl1rhi.1 dl1b35b\_  
dlwopa\_ dl1tme1\_ d4iv1a\_ gl1pvc.1 gl1fpn.1 dl1fpn1\_ d4gb31\_ dl1d4m1\_  
dl1fmd1\_ d2wzr3\_ gl1cov.1 dl1qqp3\_ gl1fmd.1 d2x5ic\_ dl1rhi3\_ gl1oop.1  
dl1hxs1\_ gl1hxs.1 dl1fpn3\_ dl1bev1\_ g2mev.1 dl1eah3\_ dl1aym1\_ dl1pvc3\_  
dl1qqp1\_ dl1zba3\_ dl1h8ta\_ d3vbhc\_ gl1b35.1 gl1bev.1 dl1hxs3\_ gl1w1.1  
dl1bev3\_ gl1tmf.1 dl1tmf1\_ dl1b35a\_ d2mev3\_ gl1eah.1 gl1h8t.1 dl1eah1\_  
d4q4w3\_ dl1ra1\_ dl1aym3\_ dl1pvc1\_ dl1zba1\_ dl1h8tc\_ dlwopc\_ dl1tme3\_  
gl1qqp.1 d4iv1c\_ gl1tme.1 d3ubub\_ dl1legia\_ dl1v7pa\_ dl1tdqb\_ d3ubua\_  
dl1c3ab\_ dl1h8ua\_ d3bx4b\_ dl1t8ca1 dl1sb2a1 dl1qdda\_ d2ziba1 d3cada\_  
dl1byfa\_ dl1j34b\_ dl1jwia\_ dl1jzna\_ dl1c3aa\_ dl1oz7b\_ dl1wmza\_ d3bdwb\_  
dl1hq8a\_ dl1fifa1 dl1dv8a\_ d3hupa\_ dl1wk1a1 dl1umra\_ d2afpa\_ d3bx4a\_  
dl1gz2a\_ dl1sl6a\_ dl1v7pb\_ d3g8ka\_ dl1ixxa\_ dl1j34a\_ dl1jwib\_ dl1gl1sa1  
dl1y17a1 dl1ja3a\_ dl1fvub\_ d3bdwa\_ dl1sb2b1 dl1fvua\_ dl1umrc\_ dl1oz7a\_  
d4m17a\_ d3cfwa1 dl1ypqa1 dl1gl1ta1 d3fd4a\_ d3l9jc\_ d4dn8a1 dl1v4lb\_  
dl1rdl1\_ d2msba\_ d4w9ta\_ dl1jvna1 d4x2ra1 dl1ka9f\_ dl1qo2a\_ d4axka1  
dl1h5ya\_ d4u28a\_ d2y88a\_ d4wd0a\_ dl1vzwa1 dl1ux8a\_ dl1dlya\_ d4i0va\_  
d2bkma\_ d2bmma\_ d2r80b\_ dl1cqxa1 dl1cg5a\_ dl1gcvb\_ d3boma\_ d2h8fb\_  
d2raoa\_ d3bj1a\_ d4hrrb\_ d2r50a\_ d3d1kb\_ d2aa1b1 d3zhwa\_ d3hf4b\_  
d3gdja\_ dl1jebb\_ d3bj1b\_ dl1x9fb\_ dl1wmub\_ dl1gcva\_ d3bcqb\_ d3d4xb\_

d1gvha1 d2dc3a\_ d3hf4a\_ d4yu3a\_ d3k8ba\_ d1qpwb\_ d2r80a\_ d3bcqa\_  
d1v4wa\_ d3wtgb\_ d1jl7a\_ d4esaa\_ d1a9we\_ d3d1ab\_ d1fsla\_ d4h21a\_  
d1v4wb\_ d1mwca\_ d1vhba\_ d1jeba\_ d1spgb\_ d1h97a\_ d1q1fa\_ d1tu9a1  
d3d1aa\_ d1hdsb\_ d3hyub\_ d2zfb\_ d3fs4a\_ d1oj6a\_ d1shrb\_ d4h21b\_  
d4yu3b\_ d1spga\_ d3hrwa\_ d3qqra\_ d3at5a\_ d4wchd\_ d3hyua\_ d1cg5b\_  
d1uc3a\_ d1hbra\_ d2raob\_ d1outb\_ d4esab\_ d3gdjb\_ d3qqqa\_ d1x9fc\_  
d3vrf\_ d1litha\_ d3mkba\_ d3d4xa\_ d3mjpa\_ d1jl6a\_ d3fh9a\_ d1outa\_  
d2dc3b\_ d1lit2a\_ d3eoka\_ d3g46a\_ d1qpwa\_ d3vrfb\_ d1ch4a\_ d1x9fd\_  
d1hdsa\_ d2zfa\_ d3mkbb\_ d1or4a\_ d3wtga\_ d1a4fa\_ d3fh9b\_ d3bomb\_  
d3cy5a\_ d3at5b\_ d1x9fa\_ d2oifa\_ d4lmb\_ d1cpcb\_ d3v57a\_ d1kn1a\_  
d1cpca\_ d4f0ta\_ d2vjha\_ d4po5b\_ d1eyxa\_ d1alla\_ d4f0tb\_ d1b33b\_  
d1b8db\_ d4h0mb\_ d1b33a\_ d2vjhb\_ d4l6b\_ d2vmlb\_ d1allb\_ d2vjta\_  
d3dbja\_ d2vmla\_ d2vjtb\_ d4f0ub\_ d1f99b\_ d4rmpa1 d1liaa\_ d1eyxb\_  
d2uulb\_ d4lmsb\_ d4f0ua\_ d2bv8a\_ d1f99a\_ d2bv8b\_ d2c71b\_ d3dbjb\_  
d4rmpb1 d1b8da\_ d4h0ma\_ d3v57b\_ d1kn1b\_ d1liab\_ d2uula\_ d2j96a\_  
g1wht.1 d1mtza\_ d2xqfa\_ d1ea5a\_ d1f6wa\_ d1dx4a\_ d1qe3a\_ d1k4ya\_  
d4qwwa\_ d2ha2a\_ d1rpma\_ d2shpa1 d1yfoa\_ d1l8ka\_ d2ooqa1 d1g4us2  
d1p15a\_ d1lara2 d1lara1 d1wcha\_ d2fh7a2 d2fh7a1 d2qvba\_ d2v9za\_  
d4kafa1 d1jmx4 d1pbya3 d1pbya4 d4iuaa3 d4bvva\_ d3k65a\_ d1ki0a3  
d1ki0a2 d1ki0a1 d1a0ha1 d1pmla\_ d3sp8a3 d2feba1 d2m5ta\_ d1cqqa\_  
d1wqsa\_ d5bpea\_ d2ipha\_ d1lvoa\_ d2bhga1 d3tnta\_ d3sjia\_ d3d23a1  
d2fyqa\_ d3tloa\_ d3zvea1 d2hrva\_ d3q3ya1 d4asha1 d4mh8a\_ d1mu2a2  
d4i7ga1 d3rp2a\_ g1lucy.1 d1fuja\_ d2zchp\_ d3w94a\_ d1si5h\_ d1lo6a\_  
g2pka.1 d1cgha\_ d1kigh\_ d1a5ia\_ d3s9ba\_ d1hj8a\_ d1ao5a\_ d2anya\_  
d1q3xa1 d1gvza\_ d1azza\_ d4gsoa\_ d2f91a1 d1iaua\_ d1gdna\_ d1eufa\_  
g1fiw.1 d1eq9a\_ d4nfea\_ d2rdla\_ d1spja\_ d1elva1 d1a7sa\_ d1ekbb\_  
d1pfxc\_ d1yc0a\_ d2aiqa\_ g1fiz.1 d1fi8a\_ d4k60a\_ d4dgja\_ d1mzaa\_  
d1op0a\_ d3tjva\_ d1pytd\_ d1sgfg\_ g1gg6.1 d2eeka\_ g1rtf.1 d1a0ja\_  
d3g01a\_ d1pytc\_ d4e7na\_ d1ddja\_ d1z8ga1 d1npma\_ d1brup\_ g1jou.1  
d1sgfa\_ d1autc\_ g2hnt.1 g1kdq.1 d1orfa\_ d3s69a\_ d4crga\_ d1fxya\_  
d1bqya\_ d2ftba\_ d1pmpa\_ d2rcqa1 d1fdqa\_ d4lkpa\_ d1sa8a\_ d1vyfa\_  
d1lpja\_ d3vg7a1 d4azqa1 d1o8va\_ d5bvqa\_ d1p6pa\_ d2qo4a\_ d1opba\_  
d1yiva1 d1o1va\_ d4bvma1 d4tkba\_ d4i3ba\_ d1bwya\_ d1ftpa\_ d4gkca\_  
d1cbia\_ d3p6da1 d1kqwa\_ d2a0aa1 d1m41a\_ d2bk7a\_ d3fjua\_ d1z5ra1  
d1uwya2 d1jqga1 d2c1ca1 d1dtda\_ d1h81a2 d1e69a\_ d1mv5a\_ d3g60a4  
g1ii8.1 d1ewqa2 d1ji0a\_ d1qhla\_ d1v43a3 d2wmfa1 d1vp1a\_ d1g2912  
d4a82a2 g1f2t.1 d2d62a1 d3tuic1 d2bbsa1 d3g60a3 d2ixea\_ d1g6ha\_  
d1sgwa1 d2qi9c\_ d3r1fa1 d3b60a1 d3d31a2 d2pzea1 g1xew.1 d1jj7a\_  
d1oxk2 d2onka1 d1wlwa\_ d1iwea\_ d1qf5a\_ d1vmaa2 d1nija1 d1np6a\_  
d2p67a1 d3ihla\_ d1ls1a2 d1s1ma2 d1liona\_ d2v40a\_ d1dj3a\_ d3hida\_  
d2vola1 d2g0ta1 d1vcoa2 d1j8mf2 d1g3qa\_ d1xjca\_ d1p9ba\_ d1qzxa3  
d1ihua2 d1ihua1 d2qm8a\_ d1dj2a\_ d4ioja\_ d1cp2a\_ d1yrba2 d1hyqa\_  
d3gqba2 d1skye3 d1xp8a1 d1tf7a2 d1tf7a1 d1ye8a1 d1skyb3 d2qe7d2  
d4blta\_ d4huta\_ d3l1daa2 d4hyya\_ d2i3ba1 d1crla\_ d3j9tb2 d3ntua2

d1vdza1 d2z43a\_ d1e9ra\_ d1nlfa\_ d3ziaa2 d1n0wa\_ d1g6oa\_ d3ziad2  
d3j9ta2 d1pzna2 d3gqbb2 d2i49a\_ d1nnfa\_ d1xvxa\_ d1ursa\_ d1h3da1  
d1iuda\_ d4m1va1 d1twya\_ d3e13x\_ d2nxoa1 d4pfua\_ d3ttma\_ d1elja\_  
d2qmw1a1 d1us5a\_ d1y3na1 d1jeta\_ d1uqwa\_ d4f19a1 d2esna2 d3thia\_  
d3fasa1 d2uyeb\_ d2xwva1 d1r91a\_ d2fyia1 d1pb7a\_ d2ozza1 d1sw5a\_  
d1nh8a1 d1vr5a1 d2g29a\_ d1xs5a\_ d3lswa\_ d2z23a\_ d3w9va\_ d3tcha\_  
d1q35a\_ d1z7me1 d3q27a\_ d1p99a\_ d1ve4a1 d2i6ea1 d4mcoa1 d4n8ya\_  
d1eu8a\_ d1zbma1 d1hsla\_ d1ixca2 d1j1na\_ d1xvya\_ d1y9ua\_ d2z22a1  
d1xoca1 d4oera\_ d1wdna\_ d5f1qa1 d1xt8a1 d4gwoa\_ d4igta1 d1pc3a\_  
d4mmpa1 d1o63a\_ d2czla1 d2onsa2 d4mija1 d1eh3a\_ d3skpa\_ d1dtza1  
d1dtza2 d1ieja\_ d1jnfa2 d1ce2a1 d1jnfa1 d1b1xa2 d1b1xa1 d1jw1a1  
d1jw1a2 d1ryoa\_ d1h76a1 d1h76a2 d1c4oa1 d2p6ra3 d2p6ra4 d1oywa2  
d1oywa3 d1wrba1 d1w36b2 d1w36b1 d1c4oa2 d3bora\_ d1t6na\_ d2eyqa5  
d2eyqa3 d2eyqa2 d2zu6a2 d1veca\_ d1uaaa1 d1w36d1 d2g9na1 d1z3ix2  
d2rb4a\_ d1hv8a1 d1hv8a2 d1t5ia\_ d1w36c2 d2j0sa2 d2j0sa1 d3hjha1  
d1z5za1 d1qdea\_ d1z63a1 d1s2ma2 d1s2ma1 d1wp9a1 d1wp9a2 d1gm5a3  
d1gm5a4 d3dina4 d3dina3 d1q0ua\_ d1w36c1 d1z3ix1 d1nкта3 d1nкта4  
d1uaaa2 d1w36d2 g1qhh.1 d2fwra2 d2fwra1 d2m9wa1 d3dfxa\_ d2fkza\_  
d1zuj1a1 d1s3qa1 d2fjca1 d1z6om1 d1veia\_ d4dyya\_ d1jiga\_ d3gvya\_  
d2pyba\_ d4cy9a1 d3bvfa1 d1r03a\_ d2cf7a\_ d1nf4a\_ d1zs3a1 d4iwka\_  
d3ka8a\_ d3np0x\_ d1n1qa\_ d1l1b3a\_ d4e6ka\_ d1z6oa1 d2fzfa1 d4dyua\_  
d3ge4a\_ d1jgca\_ d4am4a\_ d2z6ma\_ d1ji5a\_ d1vlga\_ d1lko1a1 d1krqa\_  
d3qz3a\_ d1o9ra\_ d2ffxj\_ d1euma\_ d1yv1a1 d2v2pa\_ d1j30a\_ d4di0a\_  
d1dpsa\_ d1oewa\_ d2qzxa\_ d2asia\_ d1psoe\_ d1miqa\_ d1smra\_ d2h6ta\_  
d1pfza\_ d1lizda\_ d3hd8a\_ d1j71a\_ d1dpja\_ d4aa9a\_ d1t6ex\_ g1b5f.1  
g1lya.1 g1htr.1 d1qdma2 d1lboxa\_ d1lwkra\_ d1tzsa\_ d2qzwa\_ d2v76a\_  
d1wj1a1 d1laqca\_ d1qqga2 d1ntva\_ d1n3ha\_ d4dbba\_ d3f0wa1 d1p3ra\_  
d1wgua1 d2cy4a1 d3hqca\_ d1wvha1 d1xr0b1 d1bdqa\_ d3ggta\_ d3ixoa\_  
d1mrxa\_ d2haha\_ d1tw7a\_ d4njsa\_ d1sgua\_ d2p3da\_ d1nsoa\_ d3d3ta\_  
d2rkfa\_ d1c6ya\_ d2rspa\_ d3ogpa\_ d3ekwa\_ d2o4na\_ d2j9ja\_ d1baia\_  
d3ggua\_ d3l1zua\_ d4npua\_ d4j55a\_ d2r8na\_ d2fxda\_ d2p3ca\_ d4dqea\_  
d3ttpa\_ d3t3ca\_ d2p3aa\_ d2hc0a\_ d2fdda\_ d3mwsa\_ d2za0a\_ d2c21a1  
d1k8rb\_ d1wgra1 d1ef5a\_ d1wfy1a1 d1e8ya3 d1wgya1 d2cs4a1 d1wxma1  
d2byea1 d3kh0a1 d2byfa1 d1wxaa1 d1e7ua3 d1wgda1 d1wgga1 d4q5eb\_  
d1wjna1 d1se9a\_ d3n3kb\_ d1wz0a1 d1we6a1 d2m0xa\_ d2gbka\_ d3rt3b1  
d1wh3a1 d1sifa\_ d2ekek2 d4ii2b1 d4hk2a1 d1c3ta\_ d1m94a\_ d1wgha1  
d1ttna1 d1j8ca\_ d1wx8a1 d3v6cb1 d2ma9b\_ d4i61b1 d1bt0a\_ d2jvca1  
d1iyfa\_ d2k1fa\_ d1wxva1 d1wf9a1 d1t0ya\_ d2io0b2 d1x1ma1 d2gbma\_  
d1zw7a1 d2m17a\_ d1we7a1 d2l1wpa\_ d2gbja\_ d1wjua1 d1v6ea1 d1v86a1  
d4eewa\_ d1w1aa1 d4icva\_ d4gu2a\_ d1wx7a1 d1wy8a1 d4hjka1 d2faza1  
d1v5oa1 d3ruib\_ d3waob\_ d2r2qa1 d3m95a\_ d3wana\_ d1leysc\_ d4lu0a\_  
d1of8a\_ d3unda1 d3e9aa1 d1vr6a2 d1n8fa\_ d2qkfa\_ d1o60a\_ d2h0ba\_  
d2erfa\_ d1h30a2 d1h30a1 d3mw4a1 d1pz7a\_ d2r1ba\_ d3v64a1 d3bopa1  
d3mw3a1 d1okqa1 d1okqa2 d1dszb\_ d1a6ya\_ d3cbba\_ d1ynwa1 d1r4ia\_



d1hcqa\_ d2hana\_ d2hanb\_ d2enva1 d1kb4b\_ d2n11b\_ d1lola\_ d1cita\_  
d1um8a\_ d1ixza\_ d1qvra2 d1qvra3 d1qzma\_ d1sxjc2 d1jr3d2 d2p65a\_  
d1l8qa2 d1g8pa\_ d3hu3a3 d1sxjd2 d1njfa\_ d1in4a2 d1sxja2 d1tuea1  
d2ce7a2 d1w5sa2 d1sxjb2 d1d2na\_ d1ny5a2 d1ofha\_ d2gnoa2 d2a5yb3  
d1fnaa2 d1u0ja1 d1lv7a\_ d1iqpa2 d2fnaa2 d1ixsb2 d4gita\_ d1sxje2  
d1g41a\_ d2e3fa\_ d2e3ea\_ d2l1da\_ d2ny8x\_ d2e3ga\_ d2ny9x\_ d2nz3a\_  
d2lj7a\_ d1n4na\_ d2m8bb1 d2kyqa\_ d3psma\_ d1jkza\_ d1jxca\_ d2g11a\_  
d1ug1a\_ d4uj0a\_ d1js9c\_ d1f15b\_ d1za7a\_ d1laja\_ d1t0za\_ d2i61a\_  
d1t1ta\_ d1sn4a\_ d1kv0a\_ d2lkba\_ d1npia\_ d1wwna\_ d1pe4a\_ d2kbka\_  
d2li7a\_ d1djta\_ d2kbha\_ d1dq7a\_ d1sega\_ d1omya\_ d1zywa1 d1jzaa\_  
d1n9wa1 d1bbua1 d1e1oa1 d1c0aa1 d1b8aa1 d1l0wa1 d3a74a1 d1eova1  
d1iyjb4 d1iyjb5 d1iyjb3 d1o7ia\_ d4ipca1 d1x3ea\_ d4apva\_ d1jb7a1  
d1jb7a2 d1jb7a3 d3kdfa\_ d1ue1b\_ d1wjja1 d3eiva\_ d1xjva2 d1xjva1  
d2ccza2 d1se8a\_ d1l1oc\_ d1jb7b\_ d1qvca\_ d3ulla\_ d1qzga\_ d1miau4  
d1miau5 d1miau3 d3g48a1 d1gd7a\_ d1jjcb3 d1pyba\_ d1y14b1 d2nn6i1  
d1i94l\_ d2zjra2 d1smxa\_ d2qamc2 d1hh2p1 d2r7da1 d1rl2a2 d1wfqa1  
d3bzka4 d1x6oa2 d3a0ja\_ d2j01d2 d2ja9a1 d4q15a\_ d1hr0w\_ d1luza\_  
d2n3sa\_ d2vnud1 d1h95a\_ d1go3e1 d2nn6h1 d1ne3a\_ d2mola\_ d1liz6a2  
d1jjga\_ d1e3pa2 d2ix0a3 d2ix0a2 d2lxja\_ d1ueba3 d1ueba2 d2z0sa1  
d1u0la1 d2ix0a1 d2eifa2 d2je6i1 d3i2za1 d2c35b1 d2ahob2 d1t9ha1  
d3i4oa\_ d2qall1 d1jt8a\_ d2nn6g1 d1g6pa\_ d3cama\_ d1i94q\_ d1c9oa\_  
d1d7qa\_ d2ba0a1 d2vnud2 d2vnud3 d1khia2 d2qalq1 d1wi5a1 d1xtda2  
d1dgsa2 d1ckma1 d1p16a1 d1x9na2 d3zxha\_ d1cgla\_ d1rm8a\_ d1leaka2  
d2jsda\_ d1cxva\_ d1hv5a\_ d1i76a\_ d1ohea1 d1ohea2 d2f4da\_ d1rxda\_  
d2hxpa\_ d1xria\_ d1d5ra2 d1fpza\_ d3ezza\_ d4y2ea\_ d3azy\_ d3wvja\_  
d1upsa1 d1ajoa\_ d2hyka\_ d1ajka\_ d2vy0a\_ d1o4ya\_ d3o5sa\_ d3d6ea\_  
d3atga\_ d1dypa\_ d1umza\_ d3i4ia\_ d1tdha3 d1q3ba3 d1ee8a3 d1k82a3  
g1qmo.1 g1len.1 d3zyra\_ d1fnya\_ d1n47a\_ g2ltn.1 d1avba\_ d3usua\_  
d1dhkb\_ d1f9ka\_ d1ukga\_ d1g8wa\_ d1g9fa\_ d1wbfa\_ d3wca\_ d1g7ya\_  
g1loe.1 d1mvqa\_ d1hq1a\_ d1v6ia\_ d1dbna\_ d1qnwa\_ d4l8qa\_ d1ioaa\_  
d3n35a\_ d3h33a\_ d1rwja\_ d19hca\_ d1os6a\_ d3bxua\_ d3h4na\_ d1i77a\_  
d3caoa\_ d1j0pa\_ d2ctha\_ d1duwa\_ d1ofwa\_ d2e84a\_ d1hh5a\_ d1gyoa\_  
d3h34a\_ d1wioa4 d1ccza2 d1vcaa1 d1dr9a2 d1ic1a1 d2d9qb1 d2nxyb2  
d1adqa1 d1fnga1 d1uvqb1 d1zs8a1 d2vola1 d2vola2 d1mfb12 d2jelh2  
d1uwe12 d3qq4b1 d1kjvb\_ d1k5na1 d1osph2 d4odh12 d1low0a1 d1low0a2  
d1bfob2 d3l9ra2 d3jtth1 d2fath2 d4elkb2 d1fn4b2 d2xfxb\_ d1pg7x2  
d1cqka\_ d4k71b2 d1lk2a1 d1eapb2 d4lfhg2 d1i4fa1 d2nw2a2 d1kfah2  
d1mhca1 d1h3ua1 d1wejh2 d1h0db2 d1a5fh2 d1kcvh2 d1mjuh2 d1qqda1  
d1kcrh2 d1k8ia1 d3huja2 d2nnab1 d1nfd2 d3mffb2 d1s9va1 d1lk3h2  
d1q0x12 d1fv1b1 d1neza1 d4rfeb2 d1r3ha1 d1a6tb2 d1kjva1 d1pz5b2  
d1onqa1 d2bc4a2 d1de4a1 d1k8da1 d1tcra2 d1dn0b2 d1nfd2 d2xwtb2  
d1bfoa2 d1mexh2 d1iakb1 d1ypzf2 d4f7ea2 d1q7212 d2fbjh2 d1fe8h2  
d1clzh2 d1fngb1 d1uvqa1 d1vgka1 d1c16a1 d4j12a2 d4x99b2 d1igtb3  
d1je6a1 d1q72h2 d1nldh2 d1teth2 d2hmic2 d1ilca2 d1ilca1 d1k8ib1

d1q0yh2 d1kfa12 d3frua1 d1pg7w2 d1u58a1 d1igyb4 d1igyb3 d1hyrc1  
d1klub1 d1deeb2 d1c12b2 d2bc4b2 d2ig2h2 d1kcvl2 d3wn5b1 d1lk2b\_  
d1lk3l2 d1mjul2 d1sm3h2 d1q0xh2 d1zvsal d1ydpa1 d1u8ib2 d1ypze2  
d1kcu2 d1op9a\_ d1y0la1 d1etzb1 d1legj11 d2gsib1 d1nj9a1 d4jfhd1  
d1aqk11 d1t2ja\_ d1lo4h1 d1zvya1 d3v4vl1 d4enec1 d1kxtb\_ d5e8ea1  
d2pxya\_ d4weud\_ d1xiwc\_ d2esvd1 d1qznh\_ d1logae1 d1f4xh1 d4n1hb\_  
d3ezjb1 d3mlwl1 d1kfah1 d1etza1 d1b4jh1 d3cfic\_ d4w68a\_ d2arja1  
d1ek3a\_ d2ok0l1 d1vera\_ d1uwgh1 d1blnb1 d1fpth1 d1rzga1 d2giya1  
d4m3kb1 d1nc2a1 d2nyyd1 d1ncna\_ d1fbih1 d5dxwa\_ d4fqqa1 d1dqdh1  
d1jfq11 d1kelh1 d1faih1 d1frgl1 d1figl1 d4m6n11 d1fo0a\_ d4hxb11  
d3b5ga\_ d3quyd1 d2h9gb1 d1i8kb\_ d2dd8h1 d2ck0h1 d1eaja\_ d4w6wb1  
d2a6ib3 d1t66d1 d2e27h\_ d1ob1b1 d1f11b1 d2v7na1 d2xt1b1 d1pskh1  
d4i13b1 d2op4l1 d1a0ql1 d1uwell1 d1za3a1 d1ncb11 d4uu9a\_ d1bm3h1  
d1cloh1 d1nqba2 d1cf8h1 d4y5va\_ d1mhph1 d5anma1 d4cdgc1 d4ldeb\_  
d1y0lb1 d2pcpb1 d1z3gl1 d1dfb11 d1fh5h1 d3g5xa1 d1tzib1 d4dn3l1  
d3zhka1 d2b1hh1 d2uylal d1f3dh1 d1nj9b1 d2agjh1 d2h1pl1 d1q72h1  
d8fabb1 d1ndmb1 d1rjca1 d4u6hb1 d3upca\_ d2fbj11 d1osph1 d1tvda\_  
d2cjh\_ d4fhbd1 d1bd2d1 d1rz7h1 d3nn8a\_ d1blna1 d1knoa1 d1nfdal  
d2bmk1 d1dq11\_ d1igyb1 d1igf11 d12e8h1 d3utza1 d1nc2b1 d1rihh1  
d4mwfb1 d4jvpa1 d1mieh1 d1rhfa1 d1fgn11 d1sbsh1 d1lp9e1 d1dn0a1  
d4lqf11 d1iaih1 d1kgcd1 d1mh5b1 d1gpol1 d2g60h3 d1f8t11 d2jixd1  
d4grwh\_ d1fo0b\_ d1bfob1 d1axsa1 d1u9ka\_ d1nmbh\_ d1h8na1 d1h8na2  
d1jguh1 d4eura1 d3sdy11 d35c8h1 d1w72l1 d1mvub\_ d1i9rh1 d1ob1a1  
d4wenb\_ d1yeeh1 d3ietc1 d1f58h1 d1ad0b1 d1mqk1\_ d1nbvh1 d4b50a\_  
d3r8bb\_ d1baf11 d1mamh1 d4rgne1 d2gsgb\_ d35c8l1 d1bafh1 d1ai1h1  
d2pcpa1 d2fath1 d2x1pa\_ d1orsb1 d1libg11 d1shma\_ d1a2yb\_ d1u0qa\_  
d2coqa\_ d1hilb1 d1qfwi\_ d1jv5b\_ d1fn4b1 d5e0qa\_ d1nsh1 d1plgl1  
d4ocxl1 d1kb5h1 d1rzfh1 d1pg7x1 d2fx7h1 d2oi9c\_ d1l7i11 d3eyva1  
d1d5il1 d4ffyl\_ d1tet11 d1a6wh\_ d1ac6a\_ d3dvfa\_ d1nfdel d1mimh1  
d1ri8a1 d1jhlh\_ d3dura\_ d1fskb1 d1f97a1 d3so3b1 d2ak4d1 d1lp9f1  
d4z7wf1 d1l7th1 d4y5ya\_ d4x7ec1 d1emth1 d1ikf11 d1nlbh1 d4utal1  
d1bjma1 d1eapb1 d1u6ah1 d2dtgd1 d1kj2b\_ d1xeda1 d1cleh1 d1fgvh\_  
d2bnub1 d2fb4h1 d2dtgb1 d1ktrh\_ d1jpth1 d1qkz11 d4hepg\_ d2atpb1  
d1flrh1 d2hrpl1 d1mvfa\_ d1iaim1 d3k80a1 d2jb5h1 d3zkxc\_ d4grwe\_  
d1it9h1 d1rhhb1 d3w9ec\_ d1e4wh1 d1sy6h1 d2j6eh1 d3qxta\_ d1jglh1  
d1p7ka1 d1tzhb1 d4n8pa1 d1gaf11 d2jelh1 d1wioa2 d4i0cc1 d1cicb1  
d1lmka2 d1lmka1 d1iqwh1 d1orqb1 d1ejoh1 d1jnlh1 d4zg1a\_ d43c9b\_  
d1ggb11 d1wejh1 d3q6fa1 d1f3dj1 d3c6la1 d1bqlh1 d3p9wb\_ d1a3r11  
d1h0db1 d2uzil\_ d1eo8l1 d1qfwl\_ d1n7ml1 d1igja1 d1c5ch1 d2a9mh\_  
d1rmfh1 d1fj1b1 d4heme\_ d1ccza1 d1a5fh1 d1logad1 d1dlfh\_ d1qa9b\_  
d1vgel1 d3qskb\_ d1sjxa\_ d4ozfg1 d1sq2n\_ d1qd0a\_ d1kcvh1 d1c5db1  
d3qcul1 d8faba1 d3bn9d1 d1mjuh1 d4y8dc\_ d7fabh1 d3dvgb1 d1lo0l1  
d1a6tb1 d1gigh1 d1kcrh1 d2hwz11 d1yjd1 d3clfl1 d4krna\_ d1dl7l\_  
d1e6ol1 d1mexh1 d3r0ma\_ d4kkna\_ d1fns11 d1loagh\_ d1rzial d1lucb1

d1ncw11 d4b41a\_ d1nfd1 d2mpah1 d2d7t11 d4grwf\_ d4b5ea\_ d1lk3h1  
d3u79a\_ d4u3xa\_ d1ghf11 d1bvkb\_ d1mcww1 d1b88a\_ d1jrh1 d32c2b1  
d4wemb\_ d1dsfh\_ d1op3h1 d1ce111 d1iqda1 d1qoka1 d1qoka2 d1qfuh1  
d2crya1 d1ay1h1 d1loaql\_ d3ab0b\_ d1rur11 d1t4kb1 d1bz7b1 d1n0xh1  
d1for11 d1lucb11 d4w6yb\_ d43c9a\_ d2aab11 d1tzia1 d4n1ca\_ d1k6qh1  
d3g9ab\_ d4tvsa1 d1ligmh\_ d1pz5b1 d3dx9a1 d3wxwh\_ d1nakh1 d1kcul1  
d3eaka\_ d4qlra1 d1cr911 d1d9ka\_ d1f4x11 d1deea1 d2i27n2 d1c12a1  
d2orb11 d1j8hd1 d1mcph1 d1c5da1 d1kenh1 d1bd2e1 d1h5ba\_ d4x7fc1  
d3upaa\_ d1t3fa1 d1indh1 d2dtgc1 d4hc111 d1zv5a1 d4wgvb\_ d1uwgl1  
d4f37k1 d1aqkh1 d1vesa\_ d3zkqd\_ d1fpt11 d1lo411 d1knob1 d3rrqa\_  
d1ct8b1 d4orz\_ d1mlbb1 d4hgkc1 d1dqd11 d1bogb1 d4ozhe1 d1dr9a1  
d1i7za1 d1dn0b1 d1kell1 d1rzib1 d1ypzf1 d1wtla\_ d1hkfa\_ d1fail1  
d1figh1 d2vyre\_ d1sjva\_ d1ohqa\_ d1bfoa1 d1pkqb1 d1mjul1 d1b4j11  
d1nsn11 d2arjb1 d1p4bh\_ d4aj0a\_ d3nn8b\_ d2rcja1 d1f2xk\_ d4v1dd\_  
d1adqh1 d2eksa\_ d4k3ga\_ d1jfqh1 d1uweh1 d1frgh1 d4gftb\_ d1uz8b1  
d4nlea\_ d1bm311 d1clo11 d3mcka1 d2vq1a1 d1ae6h1 d4aq1b1 d1uj3b1  
d1nbqa1 d1fh511 d2ck011 d2ywza\_ d1q7211 d4nxbx\_ d1hila1 d4hz1b1  
d2j8811 d1zmya1 d1cd0a\_ d1a4ka1 d1psk11 d1a0qh1 d4krmb\_ d1ncbh1  
d2fbjh1 d1j8he1 d1i3ua\_ d1cf811 d1fe8h1 d2p1ya1 d1eeqa\_ d2x89a\_  
d1o10a\_ d2r0lh1 d1ub5a1 d1dfbh1 d3eyvb1 d4jdvb1 d4p2cg\_ d2gsia1  
d2agj11 d1u3ha1 d2h1ph1 d1rih11 d1fskc1 d1boga1 d2a7711 d1ospl1  
d1qfoa\_ d3dwta\_ d2fx711 d1rz711 d3stba1 d1pkqa1 d1b6da1 d1dzba2  
d1dzba1 d1kj2a\_ d4l1ha\_ d1rzgb1 d1dqlh\_ d12e811 d1miel1 d1jmaa\_  
d1sbs11 d1fgnh1 d1f5811 d1mqkh\_ d1ndgb1 d3qegl1 d1ia11 d2aw2a1  
d1tqbc1 d3fo2a1 d4dkaa\_ d1f8th1 d2g6011 d2ywy\_ d1uj3a1 d1yc7a\_  
d3bd3a\_ d4w6xb1 d1nmb1\_ d1i8ka\_ d1rjlb1 d1ypze1 d1p7kb1 d1kxqe\_  
d1gpoh1 d2z4qa1 d1w72h1 d1i9r11 d4qgya1 d4xt1c\_ d2qqnh1 d1cical  
d3c08h1 d2cd0a\_ d2bdnh1 d1hnga1 d1mam11 d1nldh1 d1cr9h1 d4lcih1  
d3bkyh1 d3qg711 d1ai111 d1kxvc\_ d4iosd\_ d117ih1 d2x1qa\_ d1ub6b1  
d3k74b\_ d1libgh1 d1teth1 d1igya1 d1hxma1 d2x6ma\_ d2e71a\_ d5e03a\_  
d1qfwm\_ d2r0kh1 d1igjb1 d1rurh1 d1plgh1 d1mj8h1 d1yuhb1 d3fmg11  
d1rzf11 d1emt11 d1ad9b1 d1igtb1 d1nlb11 d1d5ih1 d3k7ua\_ d4ffyh\_  
d1bwwa\_ d3dvga1 d1a6ta1 d1fgv1\_ d4qxgl1 d1mim11 d1jh11\_ d2hffb1  
d2hh011 d1qkzh1 d117t11 d1afvh1 d1iaii1 d2cjuh\_ d1um5h1 d2ghwb2  
d2ghwb1 d1kgce1 d2fgwh1 d1ikfh1 d1dvfd\_ d2i24n1 d2xtjb\_ d1za3b1  
d2yc1a\_ d2hh0h1 d2x1oa\_ d1bvka\_ d1rjla1 d5e7ba1 d1igta1 d1il1b1  
d2fb411 d1mvua\_ d1jpt11 d32c2a1 d1fvca\_ d1iqdb1 d2hrph1 d2p4ab\_  
d4qo1a\_ d1p2cb1 d1wt5c\_ d1t4ka1 d5c1mb\_ d1it911 d1bz7a1 d1b2wh1  
d1e4w11 d1jnl11 d1yedb1 d1za6b1 d3u7aa\_ d1igfh1 d3gnm11 d1orsa1  
d1wejl1 d1a2ya\_ d1hxmb1 d1gafh1 d2j4wh1 d1pz5a1 d1j05a\_ d1a3rh1  
d4fq111 d1qfwh\_ d1eo8h1 d1n7mh1 d4s11a\_ d1kegh1 d5da4a\_ d1iqw11  
d3whxb1 d1vgeh1 d1deeb1 d1c12b1 d1t2q11 d1ad9a1 d3gsnb1 d3b2uc1  
d1ggbh1 d1t3fb1 d1nak11 d4ocmc\_ d1lila1 d2v7hb3 d2esve1 d1mcoh1  
d2qr0b1 d2q3aa\_ d1ct8a1 d1kcr11 d2pxyb\_ d2uzih\_ d5c3ld\_ d3durb\_

d1c5c11 d2ak4e1 d1d17h\_ d1xiwd\_ d1mlba1 d1rmfl1 d1i7zb1 d1dlfl\_  
d2xa3a\_ d5bq7b1 d1dqqb1 d3h4211 d1legjh1 d1kcvl1 d1fe811 d2j6e11  
d1f3rb2 d11k311 d1sm3h1 d1q0xh1 d1ghfh1 d7fab11 d1igch1 d1lo0h1  
d4idla\_ d5c2b1\_ d1jrh11 d1il1a1 d3zhda1 d4kfzc\_ d1b0wa\_ d1e6oh1  
d1mex11 d4krpb\_ d1fnsh1 d1ncwh1 d4hgma\_ d4eigb1 d4rzca\_ d2mpa11  
d4y5xa\_ d5en2b1 d3lrga1 d4ej1c1 d1rhha1 d1j05b\_ d1forh1 d1q9wb1  
d2wzpd\_ d2aq2a1 d1h0da1 d3revb1 d2ij0c1 d1tzha1 d4m7j11 d1k6ql1  
d3b9kc1 d1igml\_ d3quea1 d1dsfl\_ d1ce1h1 d1kcuh1 d1zvha1 d1zvoa1  
d1tqbb1 d1ay111 d2qsc11 d2cgrh1 d1n10h1 d1ken11 d3eo0a1 d4n9ob1  
d1n0x11 d3k1kc\_ d2aq2b1 d1ck1a1 d1enfa1 d1i4pa1 d1vloa1 d1et9a1  
d1esfa1 d2g9hd1 d4ohja1 d1klud1 d1eu3a1 d1ty0a1 d1fnua1 d2qaln1  
d2cqva1 d1fhga\_ d2k1ma\_ d2d12a1 d1biha3 d1biha1 d1biha4 d3qp3a1  
d1g1ca\_ d1gxea\_ d1cvsc2 d1cvsc1 d1xmwa2 d1m4ka2 d2otpa2 d1biha2  
d1rhfa2 d2fcba2 d2fcba1 d1wwbx\_ d1gsma2 d1epfa1 d1epfa2 d2dava1  
d1waaa\_ d1f97a2 d1x44a1 d1vcaa2 d1fnla2 d1fnla1 d3b5ha2 d3h8na2  
d3h8na1 d1bjba1 d1bjba2 d1pd6a\_ d1f2qa2 d1f2qa1 d3cx2a\_ d1nbqa2  
d3b5ha1 d1n26a1 d1xiwb\_ d1xaua\_ d1fltx\_ d2ifga1 d1olla1 d1olla2  
d1cs6a4 d1cs6a3 d1cs6a2 d1cs6a1 d2gw5a2 d1sy6a1 d1xiwa\_ d1lucta2  
d1lucta1 d1ry7b2 d1gl4b\_ d1qz1a3 d1olza1 d2c9aa1 d1wwca\_

**Family-56 (c.26.1.1)**

**Positive dataset contains 7 protein sequences.**

d2el7a\_ d2cyba\_ d1rqga2 d2yxna\_ d2g36a1 d3n9ia\_ d3sz3a1

**Negative dataset contains 3976 protein sequences.**

d1m32a\_ d1libja\_ d1c7na\_ d1iuga\_ d4q75a\_ d2bkwa1 d1t3ia\_ d1qz9a\_  
d1jf9a\_ d1eg5a\_ d1p3wa\_ d3kgwa\_ d1c11a\_ d2ctza1 d1vjoa\_ d2rfva\_  
d1gc0a\_ d1cs1a\_ d1d2fa\_ d2ch1a1 d1qgna\_ d1pffa\_ d1elua\_ d1sefa\_  
d1sfna\_ d1sq4a\_ d1xkla\_ d2wfla\_ d3i2ka1 d1lnsa3 d1mpxa2 d2cfba1  
d1dfoa\_ d1o69a\_ d1bj4a\_ d3k28a\_ d2bwpa\_ d3lg0a\_ d2fnua\_ d3ou5a\_  
d1z7da1 d1b9ha\_ d1iaya\_ d4msoa\_ d1bs0a\_ d1sffa\_ d3tqxa\_ d1mdoa\_  
d3qboa\_ d3pgya\_ d1bjna\_ d2dkja\_ d1ejia\_ d1vefa1 d4wxga\_ d3bs8a\_  
d3gbxa1 d1w23a\_ d1u08a\_ d1lc5a\_ d1b5pa\_ d2ay1a\_ d1bw0a\_ d3pd6a\_  
d7aata\_ d2csta\_ d1j32a\_ d1fg7a\_ d4wlha\_ d1o4sa\_ d1v2da\_ d1gdea\_  
d1m6sa\_ d1v72a1 d1svva\_ d1ajsa\_ d1wsta1 d2f8ja2 d1lk9a\_ d1vp4a1  
d1xi9a1 d2gb3a1 d1yaaa\_ d1r0ka3 d1j5pa3 d1vkoa2 d1vm6a2 d3qvs2a2  
d1gr0a2 d1p1ja2 d1lmra\_ d1fwxa1 d1libya\_ d1f56a\_ d1bypa\_ d1azca\_  
d1ws8a\_ d3u25a\_ d1cuoa\_ d1lid2a\_ d1rkra\_ d2iaac\_ d4dp1x\_ d1nwpa\_  
d2gima\_ d2i7sa\_ d1qhqa\_ d1gyca3 d1hfua2 d1kbva1 d1kbva2 d1sdda1  
d1sdda2 d1gyca1 d1gyca2 d1mzya1 d2bw4a1 d1aoza1 d1aoza3 d1aoza2  
d1kyaa2 d1kyaa3 d1kyaa1 d1mzya2 d4e9sa1 d1sddb1 d1sddb2 d1hfua1  
d1hfua3 d1oe1a2 d1oe1a1 d1v10a2 d1v10a3 d1v10a1 d2dara2 d2dara1  
d1wyha2 d2dloa2 d1rutx4 d1rutx3 d2cuqa2 d1x41a2 d1x41a1 d1x3ha2  
d1x3ha1 d2d8za1 d1x61a2 d1x6aa1 d1x6aa2 d2cora2 d2cora1 d1v6ga1  
d1v6ga2 d2d8za2 d1x64a1 d1x64a2 d1b8ta1 d2co8a1 d1x63a2 d2dj7a2  
d2dj7a1 d2cu8a2 d2cu8a1 d1g47a2 d1g47a1 d1j2oa1 d1wyha1 d2dloa1

d1wiga1 d1wiga2 d2cupa2 d2cupa3 d1x68a1 d2d8ya2 d2d8ya1 d1m3va2  
d1x62a1 d1x68a2 d1x61a1 d1b8ta3 d1b8ta2 d2d8xa2 d2d8xa1 d1x4ka1  
d1x4ka2 d2cuqa1 d1m3va1 d2co8a2 d1j2oa2 d1x63a1 d2cura1 d2cura2  
d1x62a2 d3sxwa1 d1j3qa\_ d4luka\_ d1a3qa1 d1iknc\_ d3brda1 d1p7h11  
d1oy3c\_ d1imhc1 d1zk9a1 d2cxka1 d2bema\_ d1pama1 d1ea9c1 d1qhoa1  
d2fhfa2 d2fhfa1 d1k3ia1 d1j0ha1 d1cxla1 d2bhua1 d1edqa1 d1f1sa2  
d1ut9a2 d1gvia1 d1txka1 d1mqta\_ d1d4m3\_ d1fmd3\_ d2mev1\_ g1aym.1  
d1ev13\_ d4q4w1\_ d1r1a3\_ d2x5ia\_ d1rhi1\_ g1r1a.1 g1d4m.1 g1rhi.1  
d1b35b\_ d1loopa\_ d1tme1\_ d4iv1a\_ g1pvc.1 g1fpn.1 d1fpn1\_ d4gb31\_  
d1d4m1\_ d1fmd1\_ d1ev11\_ d2wzr3\_ g1cov.1 d1qqp3\_ g1fmd.1 d2x5ic\_  
d1rhi3\_ g1oop.1 d1hxs1\_ g1hxs.1 d1fpn3\_ d1bev1\_ g2mev.1 d1eah3\_  
d1aym1\_ d1pvc3\_ d1zba3\_ d1h8ta\_ d3vbhc\_ g1b35.1 g1bev.1 d1hxs3\_  
g1ev1.1 d1bev3\_ g1tmf.1 d1tmf1\_ d1b35a\_ d2mev3\_ g1eah.1 g1h8t.1  
d1eah1\_ d4q4w3\_ d1r1a1\_ d1aym3\_ d1pvc1\_ d1zba1\_ d1h8tc\_ d1oopc\_  
d1tme3\_ g1qqp.1 d4iv1c\_ g1tme.1 d1ktja\_ d1ex0a1 d1g0da1 d1v70a\_  
d2f4pa1 d1yhfa1 d2bjca1 d2hsga1 d1qpza1 d1efaa1 d1ebfa2 d1au7a2  
d1e3oc2 d2ovga\_ d1sq8a\_ d1rzsa\_ d3kz3a\_ d3orca\_ d3gpdg2 d2q49a2  
d1hdgo2 d2g17a2 d2cvoa2 d2czca1 d3pwka2 d1obfo2 d1i32a2 d1zyao2  
d2pkqo2 d1b7go2 d2hjsa2 d1cf2o2 d1vkna2 d1nvmb2 d1ux8a\_ d1dlya\_  
d4i0va\_ d2bkma\_ d1dlwa\_ d2bmma\_ d2msya\_ d2djoa1 d2r5za\_ d1au7a1  
d1f43a\_ d2lmda1 d1akhb\_ d1s7ea1 d3nara\_ d1zq3p1 d2craa1 d1mija\_  
d4uuta\_ d3a01a\_ d1x58a1 d3rkqa1 d3cmya1 d2cqa1 d2da6a1 d1e3oc1  
d1mh3a1 d1ig7a\_ d1x41a1 d1wh7a1 d1gt0c1 d2mw8a\_ d1lfup\_ d1x2ma1  
d1b72a\_ d1wi3a1 d1jgga\_ d1wjha1 d1x2na1 d1mnmc\_ d2cuea1 d3k2aa\_  
d2hosa\_ d2jwta2 d1pufa\_ d1oact1 d2hi3a\_ d1b8ia\_ d4j19a\_ d3lnqa\_  
d1wh5a1 d1b8ib\_ d1fexa\_ d2cgra1 d1guua\_ d1ug2a1 d2cqqa1 d2ajea1  
d4a69c\_ d1h8ac1 d2crga1 d2iw5b1 d1xc5a1 d1ofcx1 d2cu7a1 d1wgxa1  
d2cjja1 d2ckxa1 d1gvda\_ d1hcra\_ d1tc3c\_ d1gdta1 d1u78a2 d1hlva2  
d1iufa2 d1iufa1 d1b10a2 d1d5ya1 d1d5ya2 d3lv8a\_ d1s3ga1 d1zaka1  
d1s4qa\_ d3tvta2 d1uf9a\_ d1khta\_ d1osna\_ d1p5zb\_ d4tmka\_ d3cm0a\_  
d1tmka\_ d1jaga\_ d3h86a\_ d1t0hb\_ d1nn5a\_ d2h92a\_ d3kb2a1 d2c95a1  
d1yj5a2 d1kgda\_ d1ly1a\_ d2ak3a1 d1vyva2 d1deka\_ d2grja1 d1p3ja1  
d1y63a\_ d1e4ya1 d1s96a\_ d3iija1 d1lvga\_ d1nksa\_ d1vyua2 d4e22a\_  
d1qf9a\_ d1jjva\_ d1q3ta\_ d1ki9a\_ d1lw7a2 d1teva\_ d1kjwa2 d1gsia\_  
d2iyva2 d1viaa\_ d1e6ca\_ d1g3ma\_ d1t8ta1 d1nsta\_ d1fmja\_ d1zrha\_  
d1ls6a\_ d2a3ra\_ d1aqua\_ d2zptx\_ d3ckla\_ d1texas\_ d1q44a\_ d2gwha\_  
d1odfa\_ d1uj2a\_ d4gi7a\_ d2jeoa1 d1rz3a\_ d1k6ma1 d1z0ja1 d3umra2  
d3gj0a1 d2gaoa1 d1yzga1 d1x3sa1 d1g7sa4 d1puja\_ d1udxa2 d1kk1a3  
d2o52a\_ d1jwyb\_ d1zcaa2 d1zcba2 d2fv8a1 d2cjwa\_ d3dz8a1 d1xzpa2  
d1vg8a\_ d4qxaa\_ d2ew1a1 d1x1ra1 d2bcgy\_ d3doea1 d3cona\_ d3rega\_  
d3wyga\_ d1upta\_ d2b6ha1 d1zd9a1 d1lnza2 d1r5ba3 d1n0ua2 d1r2qa\_  
d2f91a1 d2rhda\_ d3q3jb\_ d3q85a\_ d1efma1 d1r8qa\_ d2gf9a1 d2akab1  
d1ek0a\_ d1z08a1 d2gcoa1 d2dy1a2 d4g01b\_ d2cxa1 d1svia\_ d3q72a\_  
d1ni3a1 d4ac9a4 d2erxa1 d2bmea\_ d1wxqa1 d2gf0a1 d4ldja1 d1zunb3

d1d5ca\_ d41v5b\_ d1efca3 d1kmqa\_ d2g6ba1 d3lrpa\_ d1tada2 d2y8ea\_  
d4rd4a1 d1z06a1 d2heia\_ d3a58b\_ d1u01a2 d1d2ea3 d1zj6a1 d2ocba\_  
d3rwoa\_ d1mr3f\_ d2e9sa1 d4u5xa1 d2iwra\_ d2fn4a1 d3bwdd\_ d2nzja1  
d2atva1 d2ksqa\_ d3l43a\_ d1mkya2 d1mkya1 d1wmsa\_ d1jnya3 d2rmka\_  
d1f60a3 d1gota2 d1jala1 d2fh5b1 d1g16a\_ d2wblc\_ d1m7ba\_ d1wf3a1  
d1f5na2 d1t9ha2 d1z6xa1 d1z0aa1 d2fg5a1 d2a5ja1 d2bcjq2 d1s0ua3  
d1ky3a\_ d4y0va\_ d4lhwa\_ d2qmea1 d2atxa1 d1egaa1 d1ryha\_ d1moza\_  
d1nrjb\_ d2erya1 d3bfka\_ d1puia\_ d1fzqa\_ d3j3az1 d3t5ga\_ d1shza2  
d3defa\_ d2f7sa1 d3raba\_ d3tsoa\_ d3aq4a\_ d2a17a1 d3sfva1 d3bc1a\_  
d2ncda\_ d1sdma\_ d3h4sa1 d2heha\_ d2grya\_ g3kin.1 d1kk8a2 d1br2a2  
d1goja\_ d1f9va\_ d2mysa2 d1lkxa\_ d3t0qa\_ d4db1a1 d3gbja\_ d1v8ka\_  
d1k8ka2 d1k8ka1 d3uleb1 d3i33a2 d3i33a1 d1bupa1 d1dkgd2 d1dkgd1  
d4ci6a2 d1jcfa1 d4a2ba2 d2fxua1 d1yaga2 d1yaga1 d4cbua2 d1bupa2  
d1liqa2 d1liqa1 d1eb7a2 d1eb7a1 d1nmla1 d3h3no1 d3h3no2 d3ezwa2  
d1hroa\_ d4gedb\_ d3zooa\_ d1mz4a\_ d1gu2a\_ d1f1fa\_ d1dvva\_ d1c6ra\_  
d1c75a\_ d1e29a\_ d1gdva\_ d1cnoa\_ d1h32b\_ d1co6a\_ d2bh4x\_ d2aiua\_  
d5cytr\_ d1jdl\_ d1i8oa\_ d2zboa\_ d3dmia\_ d1ls9a\_ d1wvec\_ d2yk3a\_  
d3ph2b\_ d1dw0a\_ d5aura\_ d1ql3a\_ d1qn2a\_ d1f1ca\_ d2nqya\_ d1h4ga\_  
d1hixa\_ d1oa2a\_ d1olra\_ d3b7ma\_ d4h7ma1 d3wp3a\_ d2vgda\_ d1igoa\_  
d3zsea\_ d2nlra\_ d3wx5a\_ d1oa3a\_ d1pvxa\_ d1f5ja\_ d1oa4a\_ d1ks5a\_  
d4ixla1 d3sital d1h32a2 d1evsa\_ d1cnt1\_ d1pvhb\_ d1z7ca\_ d1huwa\_  
d1bgea\_ d1rhga\_ d1f6fa\_ d1f45b\_ d1i1rb\_ d1axia\_ d1etea\_ d3tgxb\_  
d1scfa\_ d2z3qa1 d3qb1a\_ d1m48a\_ d4nkqb\_ d1eera\_ d1v7mv\_ d5e4ea\_  
d2o27a\_ d3b5ka\_ d2psma1 d4zf7a\_ d3uf5a\_ d3sw2a\_ d1moxc\_ d1dx5i3  
d1edmb\_ d1autl2 d1autl1 d1dval1 d1szba2 d1kigl\_ d2y5fl\_ d1ijqa2  
d1gk5a\_ d1g1sa2 d1nt0a3 d1xdtr\_ d1lmja2 d1lmja1 d1nzia2 d2wphe\_  
d1klil\_ d1pfxl2 d1pfxl1 d1p9ja\_ d1g1ta2 d1f7ea\_ d4yzub\_ d1mlxb4  
d1mlxb5 d2y5ia\_ d1qlsa\_ d1psra\_ d3n22a\_ d2egda\_ d4ggfc\_ d2wcea\_  
d2luca\_ d4aqia\_ d3nsia\_ d2lp3a\_ d1j55a\_ d1a4pa\_ d1k8ua\_ d1pvaa\_  
d3fs7a\_ d2pvba\_ d1ttxa\_ d1rwya\_ d2kyfa\_ d1rk9a\_ d1exra\_ d1tiza1  
d1nyaa\_ d1g8ia\_ d1ggwa\_ d1wdcc\_ d3fwba\_ d1ggza\_ d2o5ga\_ d1ctaa\_  
d1m45a\_ d3i5gc\_ d1sl8a\_ d1fpwa\_ d2scpa\_ d2roaa\_ d4aqra\_ d3pn7b\_  
d1br1b\_ d2mysb\_ d1s6ca\_ d1bjfa\_ d2obha\_ d1jfka\_ d1jf0a\_ d1qv0a\_  
d1lkja\_ d2mlfc\_ d2m97a\_ d2d8na\_ d4by5a\_ d1jbaa\_ d4nqga\_ d1wdcb\_  
d2mysc\_ d1j7qa\_ d1s6ia\_ d1uhka2 d1r2ua\_ d1dtla\_ d3kf9a\_ d3pn7c\_  
d1fi6a\_ d1c07a\_ d5d67d\_ d1tuza\_ d1h8ba\_ d1eg3a2 d2zkmx1 d1snla\_  
d1gjya\_ d1y1xa\_ d1hqva\_ d1dvia\_ d1df0a1 d1qxp2 d4usla\_ d1k94a\_  
d1wkya2 d1uuqa\_ d3wh9a\_ d4m1ra\_ d1xyza\_ d4xuya\_ d2je8a5 d4bf7a1  
d3cuia\_ d1ur4a\_ d1qw9a2 d1odza\_ d2vzsa5 d1bqca\_ d2x2ya1 d1hjqa\_  
d1qnra\_ d4y7ea1 d1vjza\_ d4k68a\_ d2v3ga\_ d4hpga\_ d1nofa2 d1nq6a\_  
d1h4pa\_ d1aq0a\_ d3ziza\_ d4bs0a\_ d1ecea\_ d1h1na\_ d1ta3b\_ d1w91a2  
d1ilwa\_ d1uhva2 d1us3a2 d1egza\_ d7a3ha\_ d1tvna1 d3nyda1 d1ghsa\_  
d2cyga1 d4xv0a\_ d2c8na2 d1w32a\_ d3emca\_ d1v6ya1 d1foba\_ d2uwfa1  
d2fgla\_ d3niya1 d2c0ha1 d1rh9a1 d1yq2a5 d1szna2 d1fa2a\_ d1pama4

d5do8a1 d1ea9c3 d1hx0a2 d2fhfa5 d1qhoa4 d1avaa2 d1m53a2 d4m8ua1  
d2gjpa2 d1lwaha2 d4howa1 d1ktba2 d1j0ha3 d3vm5a1 d2x1ia\_ d1wzaa2  
d1uasa2 d2diea1 d1mxga2 d1ht6a2 d1eswa\_ d1iv8a2 d5cpsa\_ d1ud2a2  
d1zjaa1 d3gbea1 d1kwga2 d1wdpa\_ d1gcya2 d1g5aa2 d1hvxa2 d3dhpaa2  
d2bhua3 d4do4a1 d3qgva1 d1e43a2 d1g94a2 d2d3na2 d1gjwa2 d1gvia3  
d1x1na1 d1r7aa2 d1tz7a1 d4toqa\_ d1wb0a1 d1w9pa1 d1eoka\_ d1itxa1  
d1kfwaa1 d1edqa2 d2gsja\_ d1hjxa1 d1jnda1 d1vf8a1 d1etob\_ d1lumqa\_  
d1g2ha\_ d2w0pa\_ d2diaa1 d2e9ia2 d2e9ja1 d2dj4a1 d2eeba1 d2diba1  
d2dmba1 d2dmca1 d2d7oa1 d2ee6a1 d2d7pa1 d2eeaa1 d2di8a1 d1wlha1  
d2d7na1 d2nqca\_ d2d7ma1 d2dica1 d3cnka\_ d2k3ta1 d2eeca1 d1qfha1  
d2bp3a1 d1v05a\_ d2ee9a1 d2eeda1 d2di9a1 d3syxa1 d1mkea1 d2p8va\_  
d1xoda1 d1i7aa\_ d1evha\_ d1qc6a\_ d1legxa\_ d1iuka\_ d2csua1 d3q9ub\_  
d2yv1a1 d3q9na\_ d2d59a\_ d1oi7a1 d2yv2a1 d1euca1 d1y81a1 d1wgqa1  
d1v89a1 d2coda1 d1zc3b\_ d1wg7a1 d1u5ea1 d1v61a1 d2coca1 d2ys1a1  
d1v5pa1 d1ntya2 d1wjma1 d1wi1a1 d1u29a\_ d1xx0a1 d1unqa\_ d2zkmx3  
d1fhoa\_ d1v88a1 d2adza1 d1x1fa1 d1p6sa\_ d2coaa1 d1btka\_ d1v5ma1  
d1faoa\_ d2x18a\_ d1dyna\_ d1x1ga1 d4kaxb\_ d2j59m1 d1kilb2 d1xcga2  
d1txda2 d1u5da1 d1dbha2 d1wlha\_ d1upqa\_ d1v5ua1 d1foea2 d2fjla1  
d1eaza\_ d2dfka2 d2cofa1 d1kz7a2 d9ldta1 d2ewda3 d1up7a1 d2dfda1  
d1s6ya1 d1vjta1 d7mdha1 d1hyea1 d1t2da1 d1ojsa3 d1b8pa1 d1ldna1  
d1hyha1 d1civa1 d2a92a1 d1ez4a1 d1i0za1 d1y6ja1 d1gv0a1 d1ur5a1  
d1llda1 d1obba1 d1v8ba1 d1gdha1 d2dlda1 d1mx3a1 d1ygya1 d1qp8a1  
d1li4a1 d1j4aa1 d2naca1 d1txga2 d3f47a1 d2pv7a2 d1xc2a3 d2ahra2  
d4xiya1 d2f1ka2 d1pgja2 d1i36a2 d1np3a2 d1lj8a4 d1teaa3 d1qmgaa2  
d2i76a2 d2g5ca2 d1wdka3 d1dlja2 d3cuma3 d1kola2 d1f8fa2 d1qora2  
d1jqba2 d1vj0a2 d1cdoa2 d1gu7a2 d1d1ta2 d1xa0a2 d2dm6a2 d1jvba2  
d1rjwa2 d1llua2 d1tt7a2 d1piwa2 d1o89a2 d1iz0a2 d1e3ja2 d1yb5a2  
d1uufa2 d1vj1a2 d1e3ia2 d1vc2a1 d2nvwaa1 d1u8fo1 d1ydwaa1 d1hdgo1  
d2g17a1 d1cf2o1 d2czca2 d1r0ka2 d1obfo1 d2cvoa1 d1ebfa1 d1h6da1  
d1i32a1 d1zh8a1 d2q49a1 d1qkia1 d1j5pa4 d3pzra1 d1xeeaa1 d1vkoa1  
d1vm6a3 d3qvsa1 d2pkqo1 d1b7go1 d1gr0a1 d1p1ja1 d1lc0a1 d1j0xo1  
d3pwka1 d2hjsa1 d1zyao1 d1vkna1 d1t1ta1 d1nvmb1 d3sjua\_ d3ojfa1  
d1xu9a1 d2jjya1 d1n7ha\_ d1y1pa1 d1h5qa\_ d1jtva\_ d4fs3a\_ d2bkaa1  
d1gy8a\_ d2c5aa1 d1ulsa\_ d1ooea\_ d2b69a1 d1y5ma1 d1spxa\_ d1lae1a\_  
d1bxka\_ d1ydea1 d1gega\_ d1hdoa\_ d1o5ia\_ d1e6ua\_ d1snyaa1 d2rhca\_  
d3zv4a\_ d5ceja\_ d2d1ya1 d3w8ea\_ d2fmua1 d1x1ta\_ d1rpna\_ d3ay7a1  
d1k2wa\_ d1eq2a\_ d2hrba1 d3ruaa\_ d2ew8a1 d4hwka\_ d1xgka\_ d2bd0a1  
d1yo6a1 d2a35a1 d2ntva\_ d1vl8a\_ d1hdca\_ d4bkua\_ d2ag5a1 d2q45a\_  
d1nffa\_ d4iy1a\_ d1zbqa1 d1kewa\_ d1ek6a\_ d1ja9a\_ d2q46a2 d1iy8a\_  
d1cyda\_ d2ptga\_ d1hxha\_ d1uzma1 d3lyla\_ d4m89a\_ d3wyea\_ d2blla1  
d1w6ua\_ d1sb8a\_ d2q2va\_ d4nr0a\_ d1e6wa\_ d2gasa\_ d3oiga1 d2bgka1  
d1mxha\_ d1vl0a1 d1rkxa\_ d1r6da\_ d1wmaa1 d1e7wa\_ d2c07a1 d1xkqa\_  
d3tzha\_ d1g0oa\_ d3lz6a\_ d1qyca\_ d1ledoa\_ d1gz6a\_ d1oc2a\_ d1t2aa\_  
d1zema1 d2xoxa\_ d1z45a2 d1geea\_ d1p33a\_ d3lt0a\_ d4e6pa\_ d2wyua\_

d1db3a\_ d4q9na\_ d1xhla\_ d4o1ma\_ d1fmca\_ d2uvda\_ d2gdza1 d1uaya\_  
d2z1ma\_ d2o23a2 d2fr1a2 d2fr1a1 d1qsga\_ d1qyda\_ d4zjua\_ d2a4ka1  
d1ybl1a\_ d1wvga1 d1yxma1 d3f4ba\_ d1mg5a\_ d1xg5a1 d2gfoa1 d1vjva\_  
d2ayna1 d3nhea\_ d4ekfa\_ d2ckga\_ d1th0a\_ d2bkra\_ d1ex0a4 d2f4ma1  
d1x3za\_ d1t3ca\_ d1epwa3 d2a97a\_ d3f1ea\_ g1e1h.1 d3ioqa\_ d1fh0a\_  
d1o0ea\_ d1khqa\_ d1m6da\_ d2cb5a\_ d1cs8a\_ g8pch.1 d1s4va\_ d2pnsa\_  
d1vsna1 d1mira\_ d1iwda\_ d2oula\_ d7pcka\_ d3bwka\_ d3bcna\_ d2p86a\_  
d1pvja\_ d1pcia\_ d1gece\_ d1deua\_ d4bs6a\_ d1xkga1 d1cqda\_ d1jqpa2  
d2c0ya\_ d2bdza\_ d3p5ua\_ d1zoya1 d1qo8a2 d1d4ca2 d1chua2 d1jnra2  
d2jk6a2 d2jk6a1 d1feca1 d1feca2 d1lpfa1 d1lpfa2 d1xhca1 d1xhca2  
d1dx1a2 d1dx1a1 d1gera2 d1m6ia2 d1onfa1 d1onfa2 d3lada2 d3lada1  
d1w4xa1 d1w4xa2 d1gesa2 d1mo9a1 d1xdia1 d1fl2a2 d1fcda1 d1fcda2  
d1h6va2 d1h6va1 d1mo9a2 d1gv4a2 d1gv4a1 d2gv8a2 d2gv8a1 d1aoga1  
d1aoga2 d1hyua1 d1ebda1 d1ebda2 d3dk9a1 d1q1ra2 d1q1ra1 d1gesa1  
d1w5qa\_ d2c1ha\_ d1ohla\_ d1l6sa\_ d1zbf1a1 d2z1ha\_ d2etja1 d3qioa1  
d1j11a\_ d2e41a\_ d1j12a\_ d2lsna1 d1uaxa\_ d2yv0x\_ d1mu2a1 d1lekea\_  
d1i39a\_ d1ps9a2 d1lqta1 d1cjca1 d1pn0a1 d1reo1 d1ju2a1 d2f5va1  
d3c96a1 d2gmha1 d1pj5a2 d1gpea1 d1o5wa1 d1n4wa1 d2dw4a2 d2ivda1  
d1seza1 d2voua1 d1kdga1 d1s5ja1 d2hbja2 d2igia\_ d1wlja\_ d4dlea1  
d1tgoa1 d2f96a1 d3tr8a1 d3mxma\_ d1q8ia1 d1y97a1 d1w0ha\_ d1kfsa1  
d2py5a1 d1noya\_ d1d5aa1 d1yt3a3 d2guia\_ d3mwp1a1 d4kb1a\_ d1iv0a\_  
d2v76a\_ d1wj1a1 d1aqca\_ d1qqga2 d1qqga1 d1ntva\_ d1n3ha\_ d4dbba\_  
d3f0wa1 d1p3ra\_ d1wgua1 d2cy4a1 d3hqca\_ d1wvha1 d1xr0b1 d1v58a1  
d1t3ba1 d4ilfa2 d4npba2 d2av4a1 d3nvva1 d1krha3 d2h88b1 d1n62a2  
d1t3qa2 d1kf6b2 d1zoyb1 d1ffva2 d1dgya2 d1rm6c2 d1r7ha\_ d1faaa\_  
d1wika1 d1xfla\_ d1ttza1 d2f51a1 d1ti3a\_ d1nhoa\_ d1sena\_ d2i4aa\_  
d1ep7a\_ d1zmaa1 d1fo5a\_ d3lefa1 d3diea1 d2yana1 d1z6na1 d1oaza\_  
d3zywa1 d4aj8a\_ d1nm3a1 d4fiwa\_ d1wmja\_ d4hs1a1 d1liloa\_ d1xwaa1  
d1wjka1 d2vm1a\_ d1fb6a\_ d1gh2a\_ d1h75a\_ d1nw2a\_ d1kx5b\_ d3a6na\_  
d4m6ba2 d2nqbd\_ d3wkjd\_ d2yfwe\_ d4h9na\_ d5bnxa\_ d1kx5c\_ d3r45a\_  
d1eqzb\_ d4jjnb\_ d1f66c\_ d1eqza\_ d4wnnb\_ d1kx5a\_ d1u35c1 d1id3a\_  
d2nqbc\_ d1kx5d\_ d1ku5a\_ d1b67a\_ d1tafa\_ d1tafb\_ d1jfib\_ d1q9ca\_  
d1h3ob\_ d2byka1 d1n1ja\_ d4g92b\_ d1bh9a\_ d1jfia\_ d1h3oa\_ d2bykb1  
d1n1jb\_ d1pd212 d1nhya2 d2a2ra2 d1k0dd2 d1f2ea2 d1gsua2 d1f3ba2  
d2fhea2 d2pvqa1 d1tw9a2 d1oyja2 d1e6ba2 d1k0ma2 d3ik7a1 d4is0a1  
d1r5aa2 d1jlva2 d1m0ua2 d3gtub2 d1z9ha2 d1okta2 d1axda2 d2gsra2  
d1tu7a2 d1k3ya2 d1zgma1 d1b48a2 d1gnwa2 d1gwca2 d2gsta2 d1glqa2  
d1oe8a2 d1pn9a2 d1v2aa2 d1fw1a2 d1g7ea\_ d1nira1 d1qksa1 d2lj7a\_  
d2m8bb1 d2kyqa\_ d3psma\_ d1jkza\_ d1jxca\_ d2g11a\_ d1ugla\_ d4uj0a\_  
d1qqya\_ d1f6ra\_ d1ivma\_ d2gv0a\_ d1iiza\_ d2z2fa\_ d1j8xa\_ d1ghla\_  
d1b9oa\_ d3w3ea\_ d4tx7a\_ d3cqla\_ d4msta\_ d3iwra\_ d1dxja\_ d2z37a\_  
d4dyga\_ d2pjsa1 d1klla\_ d2i7ra1 d1ecsa\_ d1xqaa1 d5cj3a1 d1npba\_  
d1jifa\_ d2p7oa\_ d1nkia\_ d1mpya2 d1kw3b2 d1kw3b1 d4ghga1 d1tfza1  
d3isqa1 d3isqa2 d1sqia1 d1sqia2 d1lkda2 d1lkda1 d1mpya1 d1cjxa2



d1sp9b2 d1t47a1 d1t47a2 d1f1ua2 d1sp8a1 d1sp8a2 d1f1ua1 d1s5ja2  
d1qhta2 d4dlea2 d1tgoa2 d3py8a2 d1q8ia2 d1kfsa2 d2py5a2 d1d5aa2  
d1qsta\_ d2beia1 d4m3sa\_ d1u6ma1 d1ygha\_ d1yk3a1 d3dr6a\_ d1xmta\_  
d1z4ea1 d2ge3a1 d1bo4a\_ d2fiaa1 d2jdca1 d1y9wa1 d3to7a\_ d1wwza1  
d2f14a1 d2ozua1 d2b5ga\_ d2cy2a1 d2p0wa\_ d1cm0a\_ d4pswa\_ d1yrea1  
d1yr0a1 d1m4ia\_ d2gana1 d1yvka1 d1ghea\_ d2g3aa1 d1y7ra1 d2euia1  
d1q2ya\_ d2fsra1 d1xeba\_ d2ae6a1 d1cjwa\_ d1qsma\_ d2aj6a1 d1y9ka1  
d1i12a\_ d1vkca\_ d2atra1 d1n71a\_ d2d4pa1 d2fiwa1 d2fe7a1 d1tiqa1  
d2ou2a\_ d1yx0a1 d2fcka1 d1p0ha\_ d2j8ma\_ d2pq8a\_ d1z4ra1 d1s3za1  
d1ufha\_ d2hqya1 d2hqya2 d1lrza2 d1lrza3 d1ne9a2 d1xvqa1 d1pn0a2  
d3hy2a\_ d2cvba1 d1o8xa\_ d1we0a1 d2bmx1 d2a4va1 d1psqa\_ d1xiya1  
d1q98a\_ d1n8ja\_ d1zofa1 d2ggta\_ d3tjja\_ d4jela1 d1o73a\_ d3s9fa\_  
d2zcta\_ d1qmva\_ d1jfua\_ d2b1ka\_ d5dvba1 d2b5xa1 d2v2ga\_ d1st9a\_  
d3tb2a\_ d4llra\_ d4fh8a1 d1e2ya\_ d1knga\_ d2h30a\_ d1i5ga\_ d2z9sa\_  
d2f8aa1 d1tp9a1 d2b7ka\_ d1nm3a2 d3hvva\_ d2wfca1 d4kcea\_ d1xvwa1  
d4gqca1 d3qpma\_ d4k1fa\_ d1zsoa1 d1gp1a\_ d1prxa\_ d2m5ta\_ d1cqqa\_  
d1wqsa\_ d5bpea\_ d2ipha\_ d1lvoa\_ d2bhga1 d3tnta\_ d3sjia\_ d3d23a1  
d2fyqa\_ d3tloa\_ d3zvea1 d2hrva\_ d3q3ya1 d4asha1 d2phla1 d1fxza2  
d1fxza1 d1lrha\_ d1uija1 g1dgw.1 d2v09a\_ d1uika2 d1uika1 d1dgwa\_  
d1cg2a1 d1yloa2 d1y7ea2 d1y0ya3 d1lfwa1 d1vixa1 d1fnoa4 d1vhoa2  
d1ysja1 d1vhea2 d1z2la1 d2fvga2 d1vgya1 d1r3na1 d2grea2 d1xmba1  
g1q7l.1 d1rtqa\_ d1etha2 d1w52x1 d2ppla1 d1hpla2 d1lpbb2 d2oxea1  
d1rpla2 d1ysl1x\_ d4hs9a\_ d1ispa\_ d1ku0a\_ d3qmma\_ d1dy2a\_ d4wfia\_  
d4cg1a1 d3visa\_ d3groa\_ d1pjaa\_ d1thta\_ d2ftba\_ d1pmpa\_ d2rcqa1  
d1fdqa\_ d4lkpa\_ d1sa8a\_ d1vyfa\_ d1lpja\_ d3vg7a1 d4azqa1 d1o8va\_  
d5bvqa\_ d1p6pa\_ d2qo4a\_ d1opba\_ d1yiva1 d1o1va\_ d4bvma1 d4tkba\_  
d4i3ba\_ d1bwya\_ d1ftpa\_ d1ggla\_ d4gkca\_ d3p6da1 d1kqwa\_ d2a0aa1  
d3zxha\_ d1cgla\_ d1rm8a\_ d1leaka2 d1hy7a\_ d2jsda\_ d1hv5a\_ d1i76a\_  
d3p0ya1 d1igra1 d1igra2 d1n8yc1 d1m6ba2 d1m6ba1 d4dv8a2 d1m4la\_  
d2bk7a\_ d3fjua\_ d1z5ra1 d1kwma1 d1uwy2 d1jqga1 d2c1ca1 d1h8la2  
d2tbvc\_ d1c8nc\_ d1x36a\_ d1smvc\_ d1ng0c\_ d4sbvc\_ d1lopoa\_ d1f2nc\_  
d1cixa\_ d1y29a\_ d1v7fa\_ d2jtba\_ d1d1ha\_ d1g9pa\_ d1lupa\_ d1qk7a\_  
d1mb6a\_ d2a2va\_ d1niya\_ d1i25a\_ d1hwva\_ d2mpqa\_ d1ie6a\_ d1kqha\_  
d1la4a\_ d2mxoa1 d1d10a\_ d1koza\_ d1qk6a\_ d1emxa\_ d1lqra\_ d1c6wa\_  
d1rmka\_ d1ixta\_ d1eyoa\_ d1cnna\_ d1fu3a\_ d1g1pa\_ d1f3ka\_ d1fyga\_  
d1rypd\_ d1irua\_ d1rypc\_ d3unfk\_ d1rypa\_ d1j2pa\_ d1irui\_ d1j2qh\_  
d3unfh\_ d1m4ya\_ d1rypb\_ d1irul\_ d1irug\_ d1iru2\_ d1q5rh\_ d1rypg\_  
d1g3ka\_ d1iruf\_ d1q5qa\_ d1e94a\_ d1irub\_ d1ryph\_ d3ty6a\_ d1iruj\_  
d1iruk\_ d1rype\_ d1irud\_ d1irue\_ d3mi01\_ d1rypf\_ d1iruh\_ d2z3ba\_  
d1iruc\_ d3mka2\_ g1gk9.1 g1cp9.1 g1e3a.1 d1jgta2 d1ofda3 d1ea0a3  
d1ecfa2 d1ct9a2 d1ao0a2 d1te5a\_ d3ubub\_ d1legia\_ d1qo3c\_ d1v7pa\_  
d1tdqb\_ d3ubua\_ d1c3ab\_ d1h8ua\_ d3bx4b\_ d1t8ca1 d1sb2a1 d1qdda\_  
d2ziba1 d3cada\_ d1byfa\_ d1j34b\_ d1jwia\_ d1jzna\_ d1c3aa\_ d1wmza\_  
d3bdwb\_ d1hq8a\_ d1fifa1 d1dv8a\_ d3hupa\_ d1wk1a1 d1umra\_ d2afpa\_

d3bx4a\_ dlgz2a\_ d1sl6a\_ d1v7pb\_ d3g8ka\_ dlxxa\_ dlj34a\_ dljwib\_  
d1g1sa1 d1y17a1 d1ja3a\_ d1fvub\_ d3bdwa\_ d1sb2b1 d1fvua\_ dlumrc\_  
d1oz7a\_ d4m17a\_ d3cfwa1 d1ypqa1 d1g1ta1 d3fd4a\_ d3l9jc\_ d4dn8a1  
d1v4lb\_ d1rd1l\_ d2msba\_ d4w9ta\_ d1jvna1 d4x2ra1 d1ka9f\_ d1qo2a\_  
d4axka1 d1h5ya\_ d4u28a\_ d2y88a\_ d4wd0a\_ d1vzwa1 d1eixa\_ d3exra\_  
d2ffca1 d2fdsa1 d3n3ma1 d2czda\_ d1q6oa\_ d2yyua\_ d1vqta1 d1dbta\_  
d3ldva1 d4lt9a1 d3tc7a1 d3hoja\_ d1i4na\_ d3vnda\_ d3nl8a1 d1geqa\_  
d3naval d1v5xa\_ d4a2ra1 d3tc6a1 d1ujpa\_ d4ijba\_ d1xcfa\_ d1vc4a\_  
d1rd5a\_ d1qopa\_ d3b5va\_ d2r80b\_ d1cqxa1 d1cg5a\_ d1gcvb\_ d3boma\_  
d2h8fb\_ d2raoa\_ d3bj1a\_ d4hrrb\_ d2r50a\_ d3d1kb\_ d2aa1b1 d3zhwa\_  
d3hf4b\_ d3gdja\_ d1jebb\_ d3bj1b\_ d1x9fb\_ d1wmub\_ d1gcva\_ d3bcqb\_  
d3d4xb\_ d1gvha1 d2dc3a\_ d3hf4a\_ d4yu3a\_ d3k8ba\_ d1qpwb\_ d2r80a\_  
d3bcqa\_ d1v4wa\_ d3wtgb\_ d1j17a\_ d4esaa\_ d1a9we\_ d3d1ab\_ d1fsla\_  
d4h2la\_ d1v4wb\_ d1mwca\_ d1vhba\_ d1jeba\_ d1spgb\_ d1h97a\_ d1q1fa\_  
d1tu9a1 d3d1aa\_ d1hdsb\_ d3hyub\_ d2zfb\_ d3fs4a\_ d1oj6a\_ d1shrb\_  
d4h2lb\_ d4yu3b\_ d1spga\_ d3hrwa\_ d3qqra\_ d3at5a\_ d4wchd\_ d3hyua\_  
d1cg5b\_ d1uc3a\_ d1hbra\_ d2raob\_ d1outb\_ d4esab\_ d3gdjb\_ d3qqqa\_  
d1x9fc\_ d3vrfa\_ d1litha\_ d3mkba\_ d3d4xa\_ d3mjpa\_ d1j16a\_ d3fh9a\_  
d1outa\_ d2dc3b\_ d1it2a\_ d3eoka\_ d3g46a\_ d1qpwa\_ d3vrfb\_ d1ch4a\_  
d1x9fd\_ d1hdsa\_ d2zfb\_ d3mkbb\_ d1or4a\_ d3wtga\_ d1a4fa\_ d3fh9b\_  
d3bomb\_ d3cy5a\_ d3at5b\_ d1x9fa\_ d2oifa\_ d4lmb\_ d1cpcb\_ d3v57a\_  
d1kn1a\_ d1cpca\_ d4f0ta\_ d2vjha\_ d4po5b\_ d1eyxa\_ d1alla\_ d4f0tb\_  
d1b33b\_ d1b8db\_ d4h0mb\_ d1b33a\_ d2vjhb\_ d4lm6b\_ d2vmlb\_ d1allb\_  
d2vjta\_ d3dbja\_ d2vmla\_ d2vjtb\_ d4f0ub\_ d1f99b\_ d4rmpa1 d1liaa\_  
d1eyxb\_ d2uulb\_ d4lmsb\_ d4f0ua\_ d2bv8a\_ d1f99a\_ d2bv8b\_ d2c71b\_  
d3dbjb\_ d4rmpb1 d1b8da\_ d4h0ma\_ d3v57b\_ d1liab\_ d2uula\_ d2j96a\_  
g1gxs.1 d3nqyb\_ d4gera\_ d1bqba\_ d1r88a\_ d1sfra\_ d4qeka\_ d1b9ra\_  
d1offa\_ d1frra\_ d3wcqa\_ d1e9ma\_ d1l5pa\_ d1wria\_ d1i7ha\_ d3av8a\_  
d1czpa\_ d1rfka\_ d3p1ma1 d3b2ga\_ d2bt6a2 d4iuua3 d4bvva\_ d5hpga\_  
d3k65a\_ d1ki0a3 d1ki0a2 d1ki0a1 d1a0ha1 d1pmla\_ d3sp8a3 d2feba1  
d1xova2 d1f74a\_ d3l21a\_ d2e1da\_ d1to3a1 d1w3ia\_ d1sfla\_ d1vcva1  
d4imea\_ d1wa3a\_ d2ocza1 d1f2ja\_ d3m16a\_ d2yxga\_ d1ub3a\_ d3a5fa\_  
d1fbaa\_ d1l6wa\_ d1xfba1 d1wx0a1 d1vpxa1 d1ojxa\_ d1mxsa\_ d2a4aa1  
d1xkya1 d3cq0a1 d3s1xa\_ d1f05a\_ d1fdja\_ d3cpra1 d4d2ja\_ d1e88a1  
d1l6ja5 d1eaka4 d1eaka3 d1l6ja3 d1h8pa2 d1h8pa1 d3rp2a\_ glucy.1  
d1fuja\_ d2zchp\_ d3w94a\_ d1si5h\_ d1lo6a\_ g2pka.1 d1cgha\_ d1kigh\_  
d1a5ia\_ d3s9ba\_ d1hj8a\_ d1ao5a\_ d2anya\_ d1q3xa1 d1gvza\_ d1azza\_  
d4gsoa\_ d2f91a1 d1liaua\_ d1gdna\_ d1eufa\_ g1fiw.1 d1eq9a\_ d4nfea\_  
d2rdla\_ d1spja\_ d1elva1 d1a7sa\_ d1ekbb\_ d1pfxc\_ d1yc0a\_ d2aiqa\_  
g1fiz.1 d1fi8a\_ d4k60a\_ d4dgja\_ d1mzaa\_ d1op0a\_ d3tjva\_ d1pytd\_  
d1sgfg\_ g1gg6.1 d2eeka\_ g1rtf.1 d1a0ja\_ d3g01a\_ d1pytc\_ d4e7na\_  
d1ddja\_ d1z8ga1 d2hlca\_ d1npma\_ d1brup\_ g1jou.1 d1sgfa\_ d1autc\_  
g2hnt.1 g1kdq.1 d3s69a\_ d4crga\_ d1fxya\_ d1bqya\_ d1svpa\_ d3su6a1  
d1cula1 d4agka\_ d1vcpa\_ d1q31a\_ g1n11.1 d3e90b\_ d1ep5a\_ d3u1jb\_

d1dzka\_ d4tlja\_ d2a2ua\_ d4wfva\_ d3t1da\_ d4iaxa\_ d3zq3a\_ d2nnda\_  
d1i4ua\_ d1kxoa\_ d1bbpa\_ d1kt7a\_ d1lexsa\_ d3s26a1 d1lf7a\_ d1qfta\_  
d4gh7a\_ d1z24a1 d1qabe\_ d1xkia\_ d1lew3a\_ d3bx7a\_ d4iawa1 d1n0sa\_  
d1gkab\_ d3kzaa\_ d2k23a\_ d2l9ca1 d2joza1 d1gm6a\_ d3kffa\_ d3saoa1  
d1e5pa\_ d1yupa1 d1iiua\_ d3lgia\_ d3i77a\_ d2z9ia2 d4nsva\_ d1lcya2  
d4jcna\_ d1os8a\_ d1hpga\_ d1p3ca\_ d1l1ja\_ d1qtfa\_ d1e69a\_ d1mv5a\_  
d3g60a4 g1ii8.1 d1ewqa2 d1ji0a\_ d1qhla\_ d1v43a3 d2wmfa1 d1vpla\_  
d1g2912 d4a82a2 g1f2t.1 d2d62a1 d3tuic1 d2bbsa1 d3g60a3 d2ixea\_  
d1g6ha\_ d1sgwa1 d2qi9c\_ d3rlfa1 d3b60a1 d3d31a2 d2pzea1 g1xew.1  
d1jj7a\_ d1oxk2 d2onka1 d1wlwa\_ d1iwea\_ d1qf5a\_ d1vmaa2 d1nija1  
d1np6a\_ d2p67a1 d3ihla\_ d1okkd2 d1ls1a2 d1slma2 d1liona\_ d2v40a\_  
d1dj3a\_ d3hida\_ d2v01a1 d2g0ta1 d1vcoa2 d1j8mf2 d1g3qa\_ d1xjca\_  
d1p9ba\_ d1qzxa3 d1ihua2 d2qm8a\_ d1dj2a\_ d4ioja\_ d1cp2a\_ d1yrba2  
d1hyqa\_ d3gqba2 d1skye3 d1xp8a1 d1tf7a2 d1tf7a1 d1ye8a1 d1skyb3  
d2qe7d2 d4blta\_ d4huta\_ d3ldaa2 d4hyya\_ d2i3ba1 d1crla\_ d3j9tb2  
d3ntua2 d1vdza1 d2z43a\_ d1e9ra\_ d1nlfa\_ d3ziaa2 d1n0wa\_ d1g6oa\_  
d3ziad2 d3j9ta2 d1pzna2 d3gqbb2 d2i49a\_ d1nnfa\_ d1xvxa\_ d1ursa\_  
d1h3da1 d1iuda\_ d4mlva1 d1twya\_ d3e13x\_ d2nxoa1 d4pfua\_ d3ttma\_  
d1elja\_ d2qmwa1 d1us5a\_ d1y3na1 d1jeta\_ d1uqwa\_ d4f19a1 d2esna2  
d3thia\_ d3fasa1 d2uyeb\_ d2xwva1 d1r9la\_ d2fyia1 d1pb7a\_ d2ozza1  
d1sw5a\_ d1nh8a1 d1vr5a1 d2g29a\_ d1xs5a\_ d3lswa\_ d2z23a\_ d3w9va\_  
d3tcha\_ d1q35a\_ d1z7me1 d3q27a\_ d1p99a\_ d1ve4a1 d2i6ea1 d4mcoa1  
d4n8ya\_ d1eu8a\_ d1zbma1 d1hsla\_ d1lixca2 d1j1na\_ d1xvya\_ d1y9ua\_  
d2z22a1 d1xoca1 d4oera\_ d1wdna\_ d5f1qa1 d1xt8a1 d1i6aa\_ d4gwoa\_  
d4igta1 d1pc3a\_ d4mmpa1 d1o63a\_ d2czla1 d2onsa2 d4mija1 d1eh3a\_  
d3skpa\_ d1dtza1 d1ieja\_ d1jnfa2 d1ce2a1 d1jnfa1 d1b1xa2 d1b1xa1  
d1jw1a1 d1jw1a2 d1ryoa\_ d1h76a1 d1h76a2 d1c4oa1 d2p6ra3 d2p6ra4  
d1oywa2 d1oywa3 d1wrba1 d1w36b2 d1w36b1 d1c4oa2 d3bora\_ d1t6na\_  
d2eyqa5 d2eyqa3 d2eyqa2 d2zu6a2 d1veca\_ d1uaaa1 d1w36d1 d2g9na1  
d1z3ix2 d2rb4a\_ d1hv8a1 d1hv8a2 d1t5ia\_ d1w36c2 d2j0sa2 d2j0sa1  
d1fuka\_ d3hjha1 d1z5za1 d1qdea\_ d1z63a1 d1s2ma2 d1s2ma1 d1wp9a1  
d1wp9a2 d1gm5a3 d1gm5a4 d3dina4 d3dina3 d1q0ua\_ d1w36c1 d1z3ix1  
d1nkta3 d1nkta4 d1uaaa2 d1w36d2 g1qhh.1 d2fwra2 d2fwra1 d2v8ta\_  
d3q3ma\_ d1za0a1 d1mxra\_ d2inca\_ d1jk0a\_ d2incb\_ d1mhyb\_ d3hf1b\_  
d1mtyb\_ d1r2fa\_ d2uw1a\_ d1mhyd\_ d3n37a\_ d1afra\_ d1oquc\_ d1syya\_  
d1mtyd\_ d2olza\_ d1uzra\_ d1smsa\_ d2fkza\_ d1zujal d1s3qa1 d2fjca1  
d1z6om1 d1veia\_ d4dyya\_ d1jiga\_ d3gvya\_ d2pyba\_ d4cy9a1 d3bvfa1  
d1r03a\_ d2cf7a\_ d1nf4a\_ d1zs3a1 d4iwka\_ d3ka8a\_ d3np0x\_ d1lb3a\_  
d4e6ka\_ d1z6oa1 d2fzfa1 d4dyua\_ d3ge4a\_ d1jgca\_ d4am4a\_ d2z6ma\_  
d1ji5a\_ d1vlga\_ d1lkoa1 d1krqa\_ d3qz3a\_ d1o9ra\_ d2ffxj\_ d1euma\_  
d1yv1a1 d2v2pa\_ d1j30a\_ d4di0a\_ d1dpsa\_ d2cbia2 d2choa2 d1l8na1  
d1oewa\_ d2qzxa\_ d2asia\_ d1psoe\_ d1miqa\_ d1smra\_ d2h6ta\_ d1pfza\_  
d1lizda\_ d3hd8a\_ d1j71a\_ d1dpja\_ d4aa9a\_ d1t6ex\_ g1b5f.1 g1lya.1  
g1htr.1 d1qdma2 d1bxoa\_ d1wkra\_ d1tzsa\_ d1libqa\_ d2qzwa\_ d1lex4a2

d1c6va\_ d1bdqa\_ d3ggta\_ d3ixoa\_ d1mrxa\_ d2haha\_ d1tw7a\_ d4njsa\_  
d1sgua\_ d2p3da\_ d1nsoa\_ d3d3ta\_ d2rkfa\_ d1c6ya\_ d2rspa\_ d3ogpa\_  
d3ekwa\_ d2o4na\_ d2j9ja\_ d1baia\_ d3ggua\_ d3lzua\_ d4npua\_ d4j55a\_  
d2r8na\_ d2fxda\_ d2p3ca\_ d4dqea\_ d3ttpa\_ d3t3ca\_ d2p3aa\_ d2hc0a\_  
d2fdda\_ d3mwsa\_ d1h4ra3 d4y18a1 d2a16a3 d1wgda1 d1wgga1 d4q5eb\_  
d1wjna1 d1se9a\_ d3n3kb\_ d1wz0a1 d1we6a1 d2m0xa\_ d2gbka\_ d3rt3b1  
d1wh3a1 d1sifa\_ d2ekek2 d4ii2b1 d4hk2a1 d1c3ta\_ d1m94a\_ d1wgha1  
d1ttna1 d1j8ca\_ d1wx8a1 d3v6cb1 d2ma9b\_ d4i61b1 d1bt0a\_ d2jvca1  
d1iyfa\_ d2k1fa\_ d1wxva1 d1wf9a1 d1t0ya\_ d2io0b2 d1x1ma1 d2gbma\_  
d1zw7a1 d2m17a\_ d1ud7a\_ d1we7a1 d2lwpa\_ d2gbja\_ d1wjua1 d1v6ea1  
d1v86a1 d4eewa\_ d1wiaa1 d4icva\_ d4gu2a\_ d1wx7a1 d1wy8a1 d4hjka1  
d2faza1 d1v5oa1 d3ruib\_ d1eo6a\_ d3waob\_ d2r2qa1 d3m95a\_ d3wana\_  
d2a13a1 d2cr5a1 d1wj4a1 d1s3sg\_ d1lepwa1 d1jx4a2 d3gv5b1 d1t94a2  
d3bq0a2 d3h33a\_ d1rwja\_ d19hca\_ d3bxua\_ d3h4na\_ d1i77a\_ d3caoa\_  
d1j0pa\_ d2ctha\_ d1duwa\_ d1ofwa\_ d2e84a\_ d1hh5a\_ d1gyoa\_ d3h34a\_  
d1dszb\_ d1a6ya\_ d3cbba\_ d1ynwa1 d1r4ia\_ d1hcqa\_ d2hana\_ d2hanb\_  
d2enva1 d1kb4b\_ d2n11b\_ d1l01a\_ d1um8a\_ d1ixza\_ d1qvra2 d1qvra3  
d1qzma\_ d1sxjc2 d1jr3d2 d2p65a\_ d1g8pa\_ d3hu3a3 d1sxjd2 d1njfa\_  
d1in4a2 d1sxja2 d1tuea1 d2ce7a2 d1w5sa2 d1sxjb2 d1d2na\_ d1ny5a2  
d1ofha\_ d2gnoa2 d2a5yb3 d1fnna2 d1u0ja1 d1lv7a\_ d1iqpa2 d2fnaa2  
d1ixsb2 d4gita\_ d1sxje2 d1g41a\_ d2e3fa\_ d1mm0a\_ d2e3ea\_ d2l1da\_  
d2ny8x\_ d2e3ga\_ d2ny9x\_ d2nz3a\_ d3ia2a\_ d1a88a\_ d4dgqa1 d1hkha\_  
d1zoia\_ d2k4ua\_ d1hp2a\_ d2lu9a\_ d1baha\_ d2meoa1 d1wm7a\_ d1hlya\_  
d1n8ma\_ d1jlza\_ d1wpda\_ d1c55a\_ d1pvza\_ d1wt7a\_ d1rjia\_ d1wz5a\_  
d1m2sa\_ d1pjva\_ d1c49a\_ d1qkya\_ d2ktca1 d1wmta\_ d1du9a\_ d1j5ja\_  
d1r1ga\_ d2jca\_ d1bbua1 d1e1oa1 d1c0aa1 d1b8aa1 d1l0wa1 d3a74a1  
d1eova1 d1iyjb4 d1iyjb5 d1iyjb3 d1o7ia\_ d4ipca1 d1x3ea\_ d4apva\_  
d1jb7a1 d1jb7a2 d1jb7a3 d3kdfa\_ d1ue1b\_ d1wjja1 d3eiva\_ d1xjva2  
d1xjva1 d2ccza2 d1se8a\_ d1l1oc\_ d1jb7b\_ d1qvca\_ d1qzga\_ d1mia4  
d1mia5 d1mia3 d3g48a1 d1gd7a\_ d1mkha\_ d1pyba\_ d1y14b1 d2nn6i1  
d1i94l\_ d2zjra2 d1smxa\_ d2qamc2 d1hh2p1 d2r7da1 d1r12a2 d1wfga1  
d3bzka4 d1x6oa2 d3a0ja\_ d2j01d2 d2ja9a1 d4q15a\_ d1hr0w\_ d1luza\_  
d2n3sa\_ d2vnud1 d1h95a\_ d1go3e1 d2nn6h1 d1ne3a\_ d2m01a\_ d1iz6a2  
d1jjga\_ d1e3pa2 d2ix0a3 d2ix0a2 d2lxja\_ d1ueba3 d1ueba2 d2z0sa1  
d1u01a1 d2ix0a1 d2eifa2 d2je6i1 d3i2za1 d2c35b1 d2ahob2 d1t9ha1  
d3i4oa\_ d2qall1 d1jt8a\_ d2nn6g1 d1g6pa\_ d3cama\_ d1i94q\_ d1d7qa\_  
d2ba0a1 d2vnud2 d2vnud3 d1khia2 d2qalq1 d1wi5a1 d1xta2 d1ny4a\_  
d1dgsa2 d1ckma1 d1p16a1 d1x9na2 d1xwdc1 d3kj4a\_ d1ozna\_ d1w8aa\_  
d2ifga3 d1xkua\_ d1ohea1 d1ohea2 d2f4da\_ d1rxda\_ d2hxpa\_ d1xria\_  
d1fpza\_ d3ezza\_ d4y2ea\_ d1i9sa\_ d1c11a\_ d4lbqa\_ d1a78a\_ d1slta\_  
d4no4a\_ d3zsja\_ d3duia\_ d1g86a\_ d1is3a\_ d1qmja\_ d1hlca\_ d1tdha3  
d1q3ba3 d1ee8a3 d1k82a3 g1qmo.1 g1len.1 d3zyra\_ d1fnya\_ d1n47a\_  
g21tn.1 d1avba\_ d3usua\_ d1dhkb\_ d1f9ka\_ d1lukga\_ d1g8wa\_ d1g9fa\_  
d1wbfa\_ d3wcsa\_ d1g7ya\_ g1loe.1 d1mvqa\_ d1hqla\_ d1v6ia\_ d1dbna\_

d1qnwa\_ d1fx5a\_ d4l8qa\_ d1ioaa\_ d3n35a\_ d3ubra\_ d1qo8a1 d1d4ca1  
d2k3va\_ d1qdba\_ d1m1qa\_ d2j7aa\_ d1h21a\_ d1ogyb\_ d4fasa\_ d1jnia\_  
d1oaha\_ d1sp3a\_ d1eysc\_ d2h0ba\_ d2erfa\_ d1h30a2 d1h30a1 d3mw4a1  
d2r1ba\_ d3v64a1 d1d2sa\_ d3bopa1 d3mw3a1 d1okqa1 d1okqa2 d1wioa4  
d1ccza2 d1vcaa1 d1dr9a2 d1ic1a1 d2d9qb1 d2nxyb2 d1adqa1 d1fnga1  
d1uvqb1 d1zs8a1 d2vola1 d2vola2 d1mfb12 d2jelh2 d1uwel2 d3qq4b1  
d1kjob\_ d1k5na1 d1osph2 d4odh12 d1ow0a1 d1ow0a2 d1bfob2 d3l9ra2  
d3jtth1 d2fath2 d4elkb2 d1fn4b2 d2xfxb\_ d1pg7x2 d1cqka\_ d4k71b2  
d1lk2a1 d1eapb2 d4l1fhg2 d1i4fa1 d2nw2a2 d1kfah2 d1mhca1 d1h3ua1  
d1wejh2 d1h0db2 d1a5fh2 d1kcvh2 d1mjuh2 d1qqda1 d1kcrh2 d1k8ia1  
d3huja2 d2nnab1 d1nfd2 d3mffb2 d1s9va1 d1lk3h2 d1q0x12 d1fv1b1  
d1neza1 d4rfeb2 d1r3ha1 d1a6tb2 d1kjsa1 d1pz5b2 d1onqa1 d2bc4a2  
d1de4a1 d1k8da1 d1tcra2 d1dn0b2 d1nfd2 d2xwtb2 d1bfoa2 d1mexh2  
d1iakb1 d1ypzf2 d4f7ea2 d1q7212 d2fbjh2 d1fe8h2 d1clzh2 d1fngb1  
d1uvqa1 d1vgka1 d1c16a1 d4j12a2 d4x99b2 d1igtb3 d1je6a1 d1q72h2  
d1nldh2 d1teth2 d2hmic2 d1i1ca2 d1i1ca1 d1k8ib1 d1q0yh2 d1kfa12  
d3frua1 d1pg7w2 d1u58a1 d1igyb4 d1igyb3 d1hyrc1 d1klub1 d1deeb2  
d1c12b2 d2bc4b2 d2ig2h2 d1kcv12 d3wn5b1 d1lk2b\_ d1lk312 d1mjul2  
d1sm3h2 d1q0xh2 d1zvsal d1ydpal d1u8ib2 d1ypze2 d1kcu2 d1op9a\_  
d1y0la1 d1etzb1 d1egj11 d2gsib1 d1nj9a1 d4jfhd1 d1aqk11 d1t2ja\_  
d1lo4h1 d1zvya1 d3v4v11 d4enec1 d1kxtb\_ d5e8ea1 d2pxya\_ d4weud\_  
d1xiwc\_ d2esvd1 d1qnzh\_ d1ogae1 d1f4xh1 d4n1hb\_ d3ezjb1 d3mlw11  
d1kfah1 d1etza1 d1b4jh1 d3cfic\_ d4w68a\_ d2arja1 d1ek3a\_ d2ok011  
d1vera\_ d1uwgh1 d1blnb1 d1fpth1 d1rzga1 d2giya1 d4m3kb1 d1nc2a1  
d2nyyd1 d1ncna\_ d1fbih1 d5dxwa\_ d4fqqa1 d1dqdh1 d1jfq11 d1kelh1  
d1faih1 d1frgl1 d1fig11 d4m6n11 d1fo0a\_ d4hxb11 d3b5ga\_ d3quyd1  
d2h9gb1 d1i8kb\_ d2dd8h1 d2ck0h1 d1eaja\_ d4w6wb1 d2a6ib3 d1t66d1  
d2e27h\_ d1ob1b1 d1f11b1 d2v7na1 d1ad0a1 d2xt1b1 d1pskh1 d4i13b1  
d2op411 d1a0q11 d1uwel1 d1za3a1 d1ncb11 d4uu9a\_ d1bm3h1 d1cloh1  
d1nqba2 d1cf8h1 d4y5va\_ d1mhph1 d5anma1 d4cdgc1 d4ldeb\_ d1y0lb1  
d2pcpb1 d1z3g11 d1dfb11 d1fh5h1 d3g5xa1 d1tzib1 d4dn311 d3zhka1  
d2b1hh1 d2uy1a1 d1f3dh1 d1nj9b1 d2agjh1 d2h1p11 d1q72h1 d8fab11  
d1ndmb1 d1rjca1 d4u6hb1 d3upca\_ d2fbj11 d1osph1 d1tvda\_ d2c2vh\_  
d4fhbd1 d1bd2d1 d1rz7h1 d3nn8a\_ d1knoa1 d1nfda1 d2bmkb1 d1dq11\_  
d1igyb1 d1igf11 d12e8h1 d3utza1 d1nc2b1 d1rihh1 d4mwfb1 d4jvpa1  
d1mieh1 d1rhfa1 d1fgn11 d1sbsh1 d1lp9e1 d1dn0a1 d4lqf11 d1iaih1  
d1kgcd1 d1mh5b1 d1gp011 d2g60h3 d1f8t11 d2jixd1 d4grwh\_ d1fo0b\_  
d1bfob1 d1axsa1 d1u9ka\_ d1nmbh\_ d1h8na1 d1h8na2 d1jguh1 d4eura1  
d3sdy11 d35c8h1 d1w7211 d1mvub\_ d1i9rh1 d1ob1a1 d4wenb\_ d1yeeh1  
d3ietc1 d1f58h1 d1ad0b1 d1mqk1\_ d1nbvh1 d4b50a\_ d3r8bb\_ d1baf11  
d1mamh1 d4rgne1 d2gsgb\_ d35c811 d1bafh1 d1ai1h1 d2pcpa1 d2fath1  
d2x1pa\_ d1orsb1 d1ibgl1 d1shma\_ d1a2yb\_ d1u0qa\_ d2coqa\_ d1hilb1  
d1qfwi\_ d1jv5b\_ d1fn4b1 d5e0qa\_ d1nsnh1 d1plgl1 d4ocx11 d1kb5h1  
d1rzfh1 d1pg7x1 d2fx7h1 d2oi9c\_ d1l7i11 d3eyva1 d1d5i11 d4ffyl\_

d1tet1l d1a6wh\_ d1ac6a\_ d3dvfa\_ d1nfdel d1mimh1 d1ri8a1 d1jhlh\_  
d3dura\_ d1fskb1 d1f97a1 d3so3b1 d2ak4d1 d1lp9f1 d4z7wf1 d1l7th1  
d4y5ya\_ d4x7ec1 d1emth1 d1likfl1 d1nlbh1 d4uta11 d1bjma1 d1eapb1  
d1u6ah1 d2dtgd1 d1kj2b\_ d1xeda1 d1cleh1 d1fgvh\_ d2bnub1 d2fb4h1  
d2dtgb1 d1ktrh\_ d1jpth1 d1qkz11 d4hepg\_ d2atpb1 d1flrh1 d2hrp11  
d1mvfa\_ d1iaim1 d3k80a1 d2jb5h1 d3zkxc\_ d4grwe\_ d1it9h1 d1rhbb1  
d3w9ec\_ d1e4wh1 d1sy6h1 d2j6eh1 d3qxta\_ d1jglh1 d1p7ka1 d1tzhb1  
d4n8pa1 d1gaf11 d2jelh1 d1wioa2 d4i0cc1 d1cicb1 d1lmka2 d1lmka1  
d1iqwh1 d1lorqb1 d1ejoh1 d1jnlh1 d4zg1a\_ d43c9b\_ d1ggbl1 d1wejh1  
d3q6fa1 d1f3dj1 d3c6la1 d1bqlh1 d3p9wb\_ d1a3r11 d1h0db1 d2uzil\_  
d1eo8l1 d1qfwl\_ d1n7ml1 d1igja1 d1c5ch1 d2a9mh\_ d1rmfh1 d1fj1b1  
d4heme\_ d1ccza1 d1a5fh1 d1ogad1 d1dlfh\_ d1qa9b\_ d1vgel1 d3qskb\_  
d1sjxa\_ d4ozfg1 d1sq2n\_ d1qd0a\_ d1kcvh1 d1c5db1 d3qcul1 d8fabal  
d3bn9d1 d1mjuh1 d4y8dc\_ d7fabh1 d3dvgb1 d1lo0l1 d1a6tb1 d1gigh1  
d1kcrh1 d2hwz11 d1yjdc1 d3clfl1 d4krna\_ d1dl7l\_ d1e6ol1 d1mexh1  
d3r0ma\_ d4kkna\_ d1fns11 d1loaqh\_ d1rzia1 d1lucb1 d1ncw11 d4b41a\_  
d1nfdfl d2mpah1 d2d7tl1 d4grwf\_ d4b5ea\_ d1lk3h1 d3u79a\_ d4u3xa\_  
d1ghfl1 d1bvkb\_ d1mcww1 d1b88a\_ d1jrhh1 d32c2b1 d4wemb\_ d1dsfh\_  
d1op3h1 d1cell1 d1iqda1 d1qoka1 d1qoka2 d1qfuh1 d2crya1 d1ay1h1  
d1loaq1\_ d3ab0b\_ d1rur11 d1t4kb1 d1bz7b1 d1n0xh1 d1for11 d1lucb11  
d4w6yb\_ d43c9a\_ d2aabl1 d1tzia1 d4n1ca\_ d1k6qh1 d3g9ab\_ d4tvsal  
d1igmh\_ d1pz5b1 d3dx9a1 d3wxwh\_ d1nakh1 d1kcul1 d3eaka\_ d4qlral  
d1cr9l1 d1d9ka\_ d1f4xl1 d1deea1 d2i27n2 d1c12a1 d2orb11 d1j8hd1  
d1mcp11 d1c5da1 d1kenh1 d1bd2e1 d1h5ba\_ d4x7fc1 d3upaa\_ d1t3fa1  
d1indh1 d2dtgc1 d4hc111 d1zv5a1 d4wgvb\_ d1uwgl1 d4f37k1 d1aqkh1  
d1vesa\_ d3zkqd\_ d1fpt11 d1lo4l1 d1knob1 d3rrqa\_ d1ct8b1 d4orz\_ c\_  
d1mlbb1 d4hgkc1 d1dqd11 d1bogb1 d4ozhe1 d1dr9a1 d1i7za1 d1dn0b1  
d1kell1 d1rzib1 d1ypzf1 d1wtla\_ d1hkfa\_ d1fail1 d1figh1 d2vyre\_  
d1sjva\_ d1ohqa\_ d1bfoa1 d1pkqb1 d1mjul1 d1b4jl1 d1nsn11 d2arjb1  
d1p4bh\_ d4aj0a\_ d3nn8b\_ d2rcja1 d1f2xk\_ d4v1dd\_ d1adqh1 d2eksa\_  
d4k3ga\_ d1jfqh1 d1uweh1 d1frgh1 d4gftb\_ d1uz8b1 d4n1ea\_ d1bm3l1  
d1clo11 d3mcka1 d2vq1a1 d1ae6h1 d4aq1b1 d1uj3b1 d1nbqa1 d1fh5l1  
d2ck0l1 d2ywza\_ d1q72l1 d4nbxb\_ d1hila1 d4hzlb1 d2j88l1 d1zmya1  
d1cd0a\_ d1a4ka1 d1psk11 d1a0qh1 d4krmb\_ d1ncb11 d2fbjh1 d1j8he1  
d1i3ua\_ d1cf8l1 d1fe8h1 d2p1ya1 d1eeqa\_ d2x89a\_ d1ol0a\_ d2r0lh1  
d1ub5a1 d1dfbh1 d3eyvb1 d4jdvb1 d4p2cg\_ d2gsia1 d2agjl1 d1u3ha1  
d2h1ph1 d1rihl1 d1fskc1 d1boga1 d2a77l1 d1osp11 d1qfoa\_ d3dwta\_  
d2fx7l1 d1rz7l1 d3stba1 d1pkqa1 d1b6da1 d1dzba2 d1dzba1 d1kj2a\_  
d4l1ha\_ d1rzgb1 d1dqlh\_ d12e8l1 d1miel1 d1jmaa\_ d1sbs11 d1fgnh1  
d1f58l1 d1mqkh\_ d1ndgb1 d3qegl1 d1iail1 d2aw2a1 d1tqbc1 d3fo2a1  
d4dkaa\_ d1f8th1 d2g60l1 d2ywya\_ d1uj3a1 d1yc7a\_ d3bd3a\_ d4w6xb1  
d1nmb1\_ d1i8ka\_ d1rjlb1 d1ypze1 d1p7kb1 d1kxqe\_ d1gpoh1 d2z4qa1  
d1w72h1 d1i9r11 d4qgya1 d4xt1c\_ d2qqnh1 d1cica1 d3c08h1 d2cd0a\_  
d2bdnh1 d1hnga1 d1mam11 d1nldh1 d1cr9h1 d4lcih1 d3bkyh1 d3qg7l1

d1ai1l1 d1kxvc\_ d4iosd\_ d1l7ih1 d2x1qa\_ d1ub6b1 d3k74b\_ d1ibgh1  
d1teth1 d1ligya1 d1hxma1 d2x6ma\_ d2e7la\_ d5e03a\_ d1qfwm\_ d2r0kh1  
d1ligjb1 d1rurh1 d1plgh1 d1mj8h1 d1yuhb1 d3fmg11 d1rzfl1 d1emt11  
d1ad9b1 d1igtb1 d1nlb11 d1d5ih1 d3k7ua\_ d4ffyh\_ d1bwwa\_ d3dvga1  
d1a6ta1 d1fgvl\_ d4qxgl1 d1mim11 d1jh11\_ d2hffb1 d2hh011 d1qkzh1  
d1l7t11 d1afvh1 d1iaii1 d2cjuh\_ d1um5h1 d2ghwb2 d2ghwb1 d1kgce1  
d2fgwh1 d1likfh1 d1dvfd\_ d2i24n1 d2xtjb\_ d1za3b1 d2yc1a\_ d2hh0h1  
d2x1oa\_ d1bvka\_ d1rjla1 d5e7ba1 d1igta1 d1il1b1 d2fb411 d1mvua\_  
d1jpt11 d32c2a1 d1fvca\_ d1iqdb1 d2hrph1 d2p4ab\_ d4qola\_ d1p2cb1  
d1wt5c\_ d1t4ka1 d5c1mb\_ d1it911 d1bz7a1 d1b2wh1 d1e4w11 d1jnl11  
d1yedb1 d1za6b1 d3u7aa\_ d1igfh1 d3gnml1 d1orsa1 d1wejl1 d1a2ya\_  
d1hxmb1 d1gafh1 d2j4wh1 d1pz5a1 d1j05a\_ d1a3rh1 d4fq111 d1qfwh\_  
d1eo8h1 d1n7mh1 d4s11a\_ d1kegh1 d5da4a\_ d1iqw11 d3whxb1 d1vgeh1  
d1deeb1 d1c12b1 d1t2q11 d1ad9a1 d3gsnb1 d3b2uc1 d1ggbh1 d1t3fb1  
d1nak11 d4ocmc\_ d1lila1 d2v7hb3 d2esve1 d1mcoh1 d2qr0b1 d2q3aa\_  
d1ct8a1 d1kcr11 d2pxyb\_ d2uzih\_ d5c31d\_ d3durb\_ d1c5c11 d2ak4e1  
d1d17h\_ d1xiwd\_ d1mlba1 d1rmf11 d1i7zb1 d1dlf1\_ d2xa3a\_ d5bq7b1  
d1dqqb1 d3h4211 d1egjh1 d1kcv11 d1fe811 d2j6e11 d1f3rb2 d1l1k311  
d1sm3h1 d1q0xh1 d1ghfh1 d7fab11 d1igch1 d1lo0h1 d4idla\_ d5c2b1\_  
d1jrh11 d1il1a1 d3zhda1 d4kfcz\_ d1b0wa\_ d1e6oh1 d1mex11 d4krpb\_  
d1fnsh1 d1ncwh1 d4hgma\_ d4eigb1 d4rzca\_ d2mpa11 d4y5xa\_ d5en2b1  
d3lrga1 d4ej1c1 d1rhha1 d1j05b\_ d1forh1 d1q9wb1 d2wzpd\_ d2aq2a1  
d1h0da1 d3revb1 d2ij0c1 d1tzha1 d4m7j11 d1k6q11 d3b9kc1 d1igml\_  
d3qeua1 d1dsfl\_ d1ce1h1 d1kcu11 d1zvha1 d1zvoa1 d1tqbb1 d1ay111  
d2qsc11 d2cgrh1 d1n10h1 d1ken11 d3eo0a1 d4n9ob1 d1n0x11 d3k1kc\_  
d1c4qa\_ d2wv6d\_ d1prt1\_ d1ltrd\_ d4l63b1 d1r4pb\_ d1prtd\_ d1t10f\_  
d2bosa\_ d1prt11 d3chbd\_ d2aq2b1 d1ck1a1 d1enfa1 d1i4pa1 d1v1oa1  
d1et9a1 d1esfa1 d2g9hd1 d4ohja1 d1klud1 d1bxta1 d1eu3a1 d1ty0a1  
d1fnua1 d2cqva1 d1fhga\_ d2k1ma\_ d2d12a1 d1biha3 d1biha1 d1biha4  
d3qp3a1 d1g1ca\_ d1gxea\_ d1cvsc2 d1cvsc1 d1xmwa2 d1m4ka2 d2otpa2  
d1biha2 d1rhfa2 d2fcba2 d2fcba1 d1wwbx\_ d1gsma2 d1epfa1 d1epfa2  
d2dava1 d1waaa\_ d1f97a2 d1x44a1 d1vcaa2 d1fnla2 d1fnla1 d3b5ha2  
d3h8na2 d3h8na1 d1jbj11 d1jbj2 d1pd6a\_ d1f2qa2 d1f2qa1 d3cx2a\_  
d1nbqa2 d3b5ha1 d1n26a1 d1xiwb\_ d1xaua\_ d1fltx\_ d2ifga1 d1olla1  
d1olla2 d1cs6a4 d1cs6a3 d1cs6a2 d1cs6a1 d2gw5a2 d1sy6a1 d1xiwa\_  
d1ucta2 d1ucta1 d1ry7b2 d1gl4b\_ d1qz1a3 d1olza1 d2c9aa1 d1wwca\_

**Family-57 (c.26.1.3)**

**Positive dataset contains 6 protein sequences.**

d3rbaa\_ d2qtra\_ d3l92a\_ d2h29a\_ d1vlha\_ d4ruka\_

**Negative dataset contains 3978 protein sequences.**

d1m32a\_ d1libja\_ d1c7na\_ d1iuga\_ d4q75a\_ d2bkwa1 d1t3ia\_ d1n8pa\_  
d1qz9a\_ d1jff9a\_ d1eg5a\_ d3kgwa\_ d1cl1a\_ d2ctza1 d1vjoa\_ d2rfva\_  
d1gc0a\_ d1cs1a\_ d1d2fa\_ d2ch1a1 d1qgna\_ d1pffa\_ d1elua\_ d4nmwa\_  
d2bnma2 d1xkla\_ d2wfla\_ d3i2ka1 d1lnsa3 d1mpxa2 d1xkta1 d2hfka\_

d5d3ka\_ d2cfba1 d1dfoa\_ d1o69a\_ d1bj4a\_ d3k28a\_ d2bwpa\_ d3lg0a\_  
d2fnua\_ d3ou5a\_ d1z7da1 d1b9ha\_ d1iaya\_ d4msoa\_ d1bs0a\_ d1s0aa\_  
d1sffa\_ d3tqxa\_ d1mdoa\_ d3qboa\_ d3pgya\_ d1bjna\_ d2dkja\_ d1ejia\_  
d1vefa1 d4wxga\_ d3bs8a\_ d3gbxa1 d1w23a\_ d1sefa\_ d1sfna\_ d1sq4a\_  
d1r0ka3 d1j5pa3 d1vkoa2 d1vm6a2 d3qvsa2 d1gr0a2 d3lgia\_ d3i77a\_  
d2z9ia2 d4nsva\_ d1lcya2 d4jcna\_ d1agja\_ d1os8a\_ d1hpga\_ d1p3ca\_  
d1l1ja\_ d1qtfa\_ d1f56a\_ d1bypa\_ d1azca\_ d1ws8a\_ d3u25a\_ d1cuoa\_  
d1id2a\_ d1rkra\_ d2iaac\_ d4dp1x\_ d1nwpa\_ d2gima\_ d2i7sa\_ d1qhqa\_  
d3ehbb1 d1fftb1 d1gyca3 d1hfua2 d1kbva1 d1kbva2 d1sdda1 d1sdda2  
d1gyca1 d1gyca2 d1mzya1 d2bw4a1 d1aoza1 d1aoza3 d1aoza2 d1kyaa2  
d1kyaa1 d1mzya2 d4e9sa1 d1sddb1 d1sddb2 d1hfua1 d1hfua3 d1oe1a2  
d1oe1a1 d1v10a2 d1v10a3 d1v10a1 d2w0pa\_ d2diaa1 d2e9ia2 d2e9ja1  
d2dj4a1 d2eeba1 d2diba1 d2dmba1 d2dmca1 d2d7oa1 d2ee6a1 d2d7pa1  
d2eeaa1 d2di8a1 d1wlha1 d2d7na1 d2nqca\_ d2d7ma1 d2dica1 d3cnka\_  
d2k3ta1 d2eeca1 d1qfha1 d2bp3a1 d1v05a\_ d2ee9a1 d2eeda1 d2di9a1  
d1a3qa1 d1iknc\_ d3brda1 d1oy3c\_ d1imhc1 d1gjia1 d1zk9a1 d2cxka1  
d2bema\_ d1pama1 d1ea9c1 d1qhoa1 d2fhfa2 d2fhfa1 d1k3ia1 d1j0ha1  
d1cxlal d2bhua1 d1ledqa1 d1f1sa2 d1lut9a2 d1gvia1 d1txka1 d1zx5a1  
d2phla2 d2phla1 d1fxza2 d1fxza1 d1uija1 g1dgw.1 d2v09a\_ d1uika2  
d1uika1 d1dgwa\_ d2pa7a1 d1wlta1 d1nxma\_ d2c0za1 d1ds6b\_ d1fstb\_  
d1ex0a1 d1g0da1 d1ju8a\_ d1eixa\_ d3exra\_ d2ffca1 d2fdsa1 d3n3ma1  
d2czda\_ d1q6oa\_ d2yyua\_ d1vqta1 d1dbta\_ d3ldva1 d2bjca1 d2hsga1  
d1qpza1 d1efaa1 d1ydwa2 d2nvwa2 d1h6da2 d1zh8a2 d1qkia2 d1xeea2  
d1tlta2 d1au7a2 d1ic8a2 d3gpdg2 d2q49a2 d1hdgo2 d2g17a2 d2cvoa2  
d2czca1 d3pwka2 d1obfo2 d1i32a2 d1zyao2 d2pkqo2 d1b7go2 d2hjsa2  
d1cf2o2 d1vkna2 d1nvmb2 d2trcp\_ d2m9wa1 d3dfxa\_ d2msya\_ d2djoa1  
d2r5za\_ d1au7a1 d1f43a\_ d2lmda1 d1akhb\_ d1s7ea1 d3nara\_ d1zq3p1  
d2craa1 d1mija\_ d4uuta\_ d3a01a\_ d1x58a1 d3rkqa1 d3cmya1 d2cqxa1  
d2da6a1 d1e3oc1 d1fjla\_ d1mh3a1 d1ig7a\_ d1x41a1 d1wh7a1 d1gt0c1  
d2mw8a\_ d1lfup\_ d1x2ma1 d1b72a\_ d1wi3a1 d1jgga\_ d1wjha1 d1x2na1  
d1mnmc\_ d2cuea1 d3k2aa\_ d2hosa\_ d2jwta2 d1pufa\_ d1oact1 d2hi3a\_  
d1b8ia\_ d4j19a\_ d3lnqa\_ d1wh5a1 d1b8ib\_ d1fexa\_ d2cqra1 d1guua\_  
d1ug2a1 d2cqqa1 d2ajea1 d4a69c\_ d1h8ac1 d2crga1 d2iw5b1 d1xc5a1  
d2cu7a1 d1wgxa1 d2cjja1 d2ckxa1 d1gvda\_ d1hcra\_ d1gdta1 d1u78a2  
d6paxa1 d6paxa2 d1k78a1 d1k78a2 d1b10a2 d1d5ya1 d1d5ya2 d1gyta2  
d3lv8a\_ d1s3ga1 d1zaka1 d1s4qa\_ d3tvta2 d1uf9a\_ d1khta\_ d1ckea\_  
d1osna\_ d1p5zb\_ d3cm0a\_ d1tmka\_ d1jaga\_ d3h86a\_ d1t0hb\_ d1nn5a\_  
d2h92a\_ d3kb2a1 d2c95a1 d1yj5a2 d1kgda\_ d1ly1a\_ d2ak3a1 d1vyva2  
d1deka\_ d2grja1 d1p3ja1 d1y63a\_ d1e4ya1 d1s96a\_ d3iija1 d1lvga\_  
d1nksa\_ d1vyua2 d4e22a\_ d1qf9a\_ d1jjva\_ d1q3ta\_ d1ki9a\_ d1lw7a2  
d1teva\_ d1kjwa2 d1gsia\_ d1x6va3 d1g3ma\_ d1j99a\_ d1t8ta1 d1nsta\_  
d1zrha\_ d1ls6a\_ d2a3ra\_ d1aqua\_ d2zptx\_ d3ckla\_ d1texas\_ d1q44a\_  
d2gwha\_ d1z0ja1 d3umra2 d3gj0a1 d2gaoa1 d1yzga1 d1x3sa1 d1g7sa4  
d1puja\_ d1udxa2 d1kk1a3 d2o52a\_ d1jwyb\_ d1zcaa2 d1zcba2 d2fv8a1



d2cjwa\_ d3dz8a1 d1xzpa2 d1vg8a\_ d4qxaa\_ d2ew1a1 d1x1ra1 d2bcgy\_  
d3doea1 d3cona\_ d3rega\_ d3wyga\_ d1upta\_ d2b6ha1 d1zd9a1 d1lnza2  
d1r5ba3 d1n0ua2 d1r2qa\_ d2f91a1 d2rhda\_ d3q3jb\_ d3q85a\_ d1efma1  
d1r8qa\_ d2gf9a1 d2akab1 d1ek0a\_ d1z08a1 d2gcoa1 d2dy1a2 d4g01b\_  
d2cxxa1 d1svia\_ d3q72a\_ d1ni3a1 d4ac9a4 d2erxa1 d2bmea\_ d1wxqa1  
d2gf0a1 d4ldja1 d1zunb3 d1d5ca\_ d4lv5b\_ d1efca3 d1kmqa\_ d2g6ba1  
d3lrpa\_ d1tada2 d2y8ea\_ d4rd4a1 d1z06a1 d2heia\_ d3a58b\_ d1u01a2  
d1d2ea3 d1zj6a1 d2ocba\_ d3rwoa\_ d1mr3f\_ d2e9sa1 d4u5xa1 d2iwra\_  
d2fn4a1 d3bwdd\_ d2nzja1 d2atva1 d2ksqa\_ d3l43a\_ d1mkya2 d1mkya1  
d1wmsa\_ d1jn3a3 d2rmka\_ d1f6ba\_ d1f60a3 d1gota2 d1jala1 d2fh5b1  
d1g16a\_ d2wblc\_ d1wf3a1 d1f5na2 d1t9ha2 d1z6xa1 d1z0aa1 d2fg5a1  
d2a5ja1 d2bcjq2 d1s0ua3 d1ky3a\_ d4y0va\_ d4lhwa\_ d2qmea1 d2atxa1  
d1egaa1 d1ryha\_ d1moza\_ d1nrjb\_ d2erya1 d3bfka\_ d1puia\_ d1fzqa\_  
d3j3az1 d3t5ga\_ d1shza2 d3defa\_ d2f7sa1 d3raba\_ d3tsoa\_ d3aq4a\_  
d2a17a1 d3sfva1 d3bc1a\_ d2ncda\_ d1sdma\_ d3h4sa1 d2heha\_ d2grya\_  
g3kin.1 d1kk8a2 d1br2a2 d1goja\_ d1f9va\_ d2mysa2 d1lkxa\_ d3t0qa\_  
d4db1a1 d3gbja\_ d1ry6a\_ d2ovga\_ d1sq8a\_ d1rzsa\_ d3kz3a\_ d3orca\_  
d1k8ka2 d1k8ka1 d3uleb1 d3i33a2 d3i33a1 d1bupa1 d1dkgd2 d1dkgd1  
d4ci6a2 d1jcf1a1 d4a2ba2 d2fxua1 d1yaga2 d1yaga1 d4cbua2 d1bupa2  
d3vrda1 d3vrda2 d1fcdc2 d1fcdc1 d1h1oa2 d1m70a2 d1m70a1 d1ig8a1  
d1czan2 d1czan3 d1czan1 d1ig8a2 d1czan4 d1bg3a4 d1bg3a3 d1bg3a2  
d1bg3a1 d1nira1 d1zc6a1 d1zbsa1 d1zbsa2 d1zc6a2 d2ch5a2 d2ch5a1  
d1zxaa2 d1zxaa1 d1hroa\_ d4gedb\_ d3zooa\_ d1mz4a\_ d1gu2a\_ d1f1fa\_  
d1dvva\_ d1c6ra\_ d1c75a\_ d1e29a\_ d1gdva\_ d1cnoa\_ d1h32b\_ d1co6a\_  
d2bh4x\_ d2aiua\_ d5cytr\_ d1jdl1a\_ d1i8oa\_ d2zboa\_ d3dmia\_ d1ls9a\_  
d1wvec\_ d2yk3a\_ d3ph2b\_ d1dw0a\_ d5aura\_ d1ql3a\_ d1qn2a\_ d1f1ca\_  
d2nqya\_ d1h4ga\_ d1hixa\_ d1oa2a\_ d1olra\_ d3b7ma\_ d4h7ma1 d3wp3a\_  
d2vgda\_ d1ligoa\_ d3zsea\_ d2nlra\_ d3wx5a\_ d1oa3a\_ d1pvxa\_ d1m4wa\_  
d1f5ja\_ d1oa4a\_ d1ks5a\_ d4ixla1 d3sita1 d1evsa\_ d1cnt1\_ d1pvhb\_  
d1z7ca\_ d1huwa\_ d1bgea\_ d1rhga\_ d1f6fa\_ d1f45b\_ d1i1rb\_ d1axia\_  
d1etea\_ d3tgxb\_ d1scfa\_ d2z3qa1 d3qb1a\_ d1hula\_ d1m48a\_ d4nkqb\_  
d1eera\_ d1v7mv\_ d5e4ea\_ d2o27a\_ d3b5ka\_ d2psma1 d4zf7a\_ d3uf5a\_  
d4x51a\_ d1d9ca\_ d4ypgc1 d3oq3a\_ d1lqsl\_ d1n1fa\_ d1aula\_ d1wu3i\_  
d3bes1\_ d3ux9a\_ d3sw2a\_ d1moxc\_ d1dx5i3 d1edmb\_ d1aut12 d1aut11  
d1dva11 d1szba2 d1kigl\_ d2y5fl\_ d1ijqa2 d1gk5a\_ d1g1sa2 d1nt0a3  
d1xdtr\_ d1lmja2 d1lmja1 d1nzia2 d2wphe\_ d1klil\_ d1pfx12 d1pfx11  
d1p9ja\_ d1g1ta2 d1f7ea\_ d4yzub\_ d2mgpa1 d1b9wa1 d1b9wa2 d2mgpa2  
d1obl2 d1n1ia2 d1n1ia1 d2npra2 d2npra1 d1m1xb5 d2y5ia\_ d1qlsa\_  
d1psra\_ d3n22a\_ d2egda\_ d4ggfc\_ d2wcea\_ d2luca\_ d4aqia\_ d3nsia\_  
d2lp3a\_ d1j55a\_ d1a4pa\_ d1nsha\_ d1lexra\_ d1tiza1 d1nyaa\_ d1g8ia\_  
d1ggwa\_ d1wdcc\_ d3fwba\_ d1ggza\_ d2o5ga\_ d1ctaa\_ d1m45a\_ d3i5gc\_  
d1sl8a\_ d1fpwa\_ d2scpa\_ d2roaa\_ d4aqra\_ d3pn7b\_ d1br1b\_ d2mysb\_  
d1s6ca\_ d1bjfa\_ d2obha\_ d1jfka\_ d1jf0a\_ d1qv0a\_ d1lkja\_ d2mlfc\_  
d2m97a\_ d2d8na\_ d4by5a\_ d1jbaa\_ d4nqga\_ d1wdcb\_ d2mysc\_ d1j7qa\_

d1s6ia\_ d1uhka2 d1r2ua\_ d1dtla\_ d3kf9a\_ d3pn7c\_ d1qjta\_ d1c07a\_  
d5d67d\_ d1tuza\_ d1h8ba\_ d1eg3a1 d1eg3a2 d2zkmx1 d1snla\_ d1sfsa\_  
d1wkya2 d1uuqa\_ d3wh9a\_ d4m1ra\_ d1xyza\_ d4xuya\_ d2je8a5 d4bf7a1  
d3cuia\_ d1ur4a\_ d1qw9a2 d1odza\_ d2vzsa5 d1bqca\_ d2x2ya1 d1hjqa\_  
d1qnra\_ d4y7ea1 d1vjza\_ d4k68a\_ d2v3ga\_ d4hpga\_ d1nofa2 d1nq6a\_  
d1h4pa\_ d1aq0a\_ d3ziza\_ d4bs0a\_ d1ecea\_ d1h1na\_ d1ta3b\_ d1w91a2  
d1i1wa\_ d1us3a2 d1egza\_ d7a3ha\_ d1tvna1 d3nyda1 d1ghsa\_ d2cyga1  
d4xv0a\_ d2c8na2 d1w32a\_ d3emca\_ d1v6ya1 d1foba\_ d2uwfa1 d2fgla\_  
d3niya1 d2c0ha1 d1rh9a1 d1yq2a5 d1szna2 d1fa2a\_ d1pama4 d5do8a1  
d1ea9c3 d1hx0a2 d2fhfa5 d1qhoa4 d1avaa2 d1m53a2 d4m8ua1 d2gjpa2  
d1lwha2 d4howa1 d1ktba2 d1j0ha3 d3vm5a1 d2x1ia\_ d1wzaa2 d1uusa2  
d2diea1 d1mxga2 d1ht6a2 d1iv8a2 d5cpsa\_ d1ud2a2 d1zjaa1 d3gbea1  
d1kwga2 d1wdpa\_ d1gcya2 d1g5aa2 d1hvxa2 d3dhp2 d2bhua3 d4do4a1  
d3qgva1 d1e43a2 d1g94a2 d2d3na2 d1gjwa2 d1gvia3 d1x1na1 d1r7aa2  
d1tz7a1 d4c7ga2 d2gjxa1 d1jaka1 d1yhta1 d4toqa\_ d1wb0a1 d1w9pa1  
d1eoka\_ d1itxa1 d1kfw1 d1goia2 d1ledqa2 d2gsja\_ d1hjxa1 d1jnda1  
d1vf8a1 d3wdpp1 d3wq5a\_ d1gnxa\_ d4gxpa\_ d4hz8a\_ d1e4mm\_ d3aiua\_  
d1wcca1 d1qvba\_ d3ahxa\_ d1v02a\_ d2dgaa\_ d1pbga\_ d1vffa1 d1qoxa\_  
d4ha4a\_ d1mixa2 d1e5wa2 d1isna2 d2a16b2 d1g4ma1 d2y8ga\_ d1xkea1  
d2y8fa\_ d2v76a\_ d1wj1a1 d1aqca\_ d1qqga2 d1qqga1 d1ntva\_ d1n3ha\_  
d4dbba\_ d3f0wa1 d1p3ra\_ d1wgua1 d2cy4a1 d3hqca\_ d1wvha1 d1xr0b1  
d1wgqa1 d1v89a1 d2coda1 d1zc3b\_ d1wg7a1 d1u5ea1 d1v61a1 d2coca1  
d2ys1a1 d1v5pa1 d1ntya2 d1wjma1 d1wi1a1 d1u29a\_ d1xx0a1 d1unqa\_  
d2zkmx3 d1fhoa\_ d1v88a1 d2adza1 d1x1fa1 d1p6sa\_ d2coaa1 d1btka\_  
d1v5ma1 d1faoa\_ d2x18a\_ d1dyna\_ d1x1ga1 d4kaxb\_ d2j59m1 d1ki1b2  
d1xcga2 d1txda2 d1u5da1 d1dbha2 d1wlha\_ d1upqa\_ d1v5ua1 d1foea2  
d2fj1a1 d1eaza\_ d2dfka2 d2cofa1 d1kz7a2 d91dta1 d2ewda3 d1up7a1  
d2dfda1 d1s6ya1 d1vjta1 d7mdha1 d1hyea1 d1t2da1 d1ojsa3 d1ldna1  
d1hyha1 d1civa1 d2a92a1 d1ez4a1 d1i0za1 d1y6ja1 d1gv0a1 d1ur5a1  
d1llda1 d1obba1 d1v8ba1 d1gdha1 d1l17da1 d2dlda1 d1mx3a1 d1ygya1  
d1qp8a1 d1li4a1 d1j4aa1 d1npya1 d3t4ea2 d1a4ia1 d1o0sa1 d2hk9a2  
d2egga2 d1b26a1 d1bvua1 d1gq2a1 d1c1da1 d1leha1 d1gtma1 d1euza1  
d1nvtal d3dona2 d1gpja2 d1vi2a1 d1p77a1 d1nyta1 d1b0aa1 d1vl6a1  
d1v91a1 d1txga2 d3f47a1 d1mv8a2 d2pv7a2 d1xc2a3 d2ahra2 d4xiya1  
d2f1ka2 d1pgja2 d1i36a2 d1np3a2 d1l1j8a4 d1teaa3 d1qmga2 d2i76a2  
d2g5ca2 d1wdka3 d1dlja2 d3cuma3 d1kola2 d1f8fa2 d1qora2 d1jqba2  
d1vj0a2 d1cdoa2 d1gu7a2 d1d1ta2 d1xa0a2 d2dm6a2 d1jvba2 d1llua2  
d1h2ba2 d1tt7a2 d1piwa2 d1o89a2 d1liz0a2 d1e3ja2 d1yb5a2 d1uufa2  
d1vj1a2 d1e3ia2 d3gpdg1 d2nvwa1 d1u8fo1 d1ydwa1 d1hdgo1 d2g17a1  
d1cf2o1 d2czca2 d1r0ka2 d1obfo1 d2cvoa1 d1ebfa1 d1h6da1 d1i32a1  
d1zh8a1 d2q49a1 d1qkia1 d1j5pa4 d3pzra1 d1xeaa1 d1vkoa1 d1vm6a3  
d3qvsa1 d2pkqo1 d1b7go1 d1gr0a1 d1p1ja1 d1lc0a1 d1j0xo1 d3pwka1  
d2hjsa1 d1zyao1 d1vkna1 d1tlta1 d1nvmb1 d3sjua\_ d3ojfa1 d1xu9a1  
d2jjya1 d1n7ha\_ d1y1pa1 d1h5qa\_ d1jtva\_ d4fs3a\_ d2bkaa1 d1gy8a\_

d2c5aa1 d1ulsa\_ d1ooea\_ d2b69a1 d1y5ma1 d1spxa\_ d1aela\_ d1bxka\_  
d1ydea1 d1gega\_ d1hdoa\_ d1o5ia\_ d1e6ua\_ d1snya1 d2rhca\_ d3zv4a\_  
d5ceja\_ d2d1ya1 d1fjha\_ d3w8ea\_ d2fmua1 d1x1ta\_ d1rpna\_ d3ay7a1  
d1k2wa\_ d1eq2a\_ d2hrba1 d3ruaa\_ d2ew8a1 d4hwka\_ d1xgka\_ d2bd0a1  
d1yo6a1 d2a35a1 d2ntva\_ d1vl8a\_ d1hdca\_ d4bkua\_ d2ag5a1 d2q45a\_  
d1nffa\_ d4iy1a\_ d1zbqa1 d1kewa\_ d1ek6a\_ d1ja9a\_ d2q46a2 d1iy8a\_  
d1cyda\_ d2ptga\_ d1hxha\_ d1uzma1 d3lyla\_ d4m89a\_ d3wyea\_ d2b11a1  
d1w6ua\_ d1sb8a\_ d2q2va\_ d4nr0a\_ d1e6wa\_ d2gasa\_ d3oiga1 d2bgka1  
d1mxha\_ d1vl0a1 d1rkxa\_ d1r6da\_ d1wmaa1 d1e7wa\_ d2c07a1 d1xkqa\_  
d3tzha\_ d1g0oa\_ d3lz6a\_ d1qyca\_ d1ledoa\_ d1gz6a\_ d1loc2a\_ d1t2aa\_  
d1zema1 d2xoxa\_ d1z45a2 d1geea\_ d1p33a\_ d3lt0a\_ d4e6pa\_ d2wyua\_  
d1db3a\_ d4q9na\_ d1xhla\_ d4o1ma\_ d1fmca\_ d2uvda\_ d2gdza1 d1uaya\_  
d2z1ma\_ d2o23a2 d2fr1a2 d2fr1a1 d1qsga\_ d1qyda\_ d4zjua\_ d2a4ka1  
d1ybl1a\_ d1wvga1 d1yxma1 d3f4ba\_ d1mg5a\_ d1xg5a1 d1cmxa\_ d1xd3a\_  
d3ifwa\_ d3ulra1 d1g9ka2 d1kapp2 d1k7ia2 d1t3ca\_ d2a97a\_ d3fiea\_  
g1elh.1 d3ioqa\_ d1fh0a\_ d1o0ea\_ d1khqa\_ d1m6da\_ d2cb5a\_ d1cs8a\_  
g8pch.1 d1s4va\_ d2pnsa\_ d1vsna1 d1iwda\_ d2oula\_ d7pcka\_ d3bwka\_  
d3bcna\_ d2p86a\_ d1pvja\_ d1pcia\_ d1gece\_ d1deua\_ d4bs6a\_ d1xkga1  
d1cqda\_ d1jqpa2 d2c0ya\_ d2bdza\_ d3p5ua\_ d1ex4a2 d2jk6a2 d2jk6a1  
d1fecal d1fecal d1lpfa1 d1lpfa2 d1xhca1 d1xhca2 d1dxla2 d1dxla1  
d1gera2 d1m6ia2 d1onfa1 d1onfa2 d3lada2 d3lada1 d1w4xa1 d1w4xa2  
d1gesa2 d1mo9a1 d1xdia1 d1fl2a2 d1fl2a1 d1fcda1 d1fcda2 d1h6va2  
d1h6va1 d1mo9a2 d1gv4a2 d1gv4a1 d2gv8a2 d2gv8a1 d1aoga1 d1aoga2  
d1hyua1 d1ebda1 d1ebda2 d3dk9a1 d1q1ra2 d1q1ra1 d1gesa1 d1pv8a\_  
d1w5qa\_ d2c1ha\_ d1l6sa\_ d1zbfa1 d2z1ha\_ d2etja1 d3qioa1 d1j11a\_  
d2e4la\_ d1j12a\_ d2l1sna1 d1lio2a\_ d1uaxa\_ d2yv0x\_ d1mu2a1 d1lekea\_  
d1i39a\_ d1pn0a1 d1reoal d1ju2a1 d2f5va1 d3c96a1 d2gmha1 d1pj5a2  
d1o5wa1 d1n4wa1 d1k0ia1 d2dw4a2 d2ivda1 d1seza1 d2voua1 d1kdga1  
d1s5ja1 d2hbja2 d2igia\_ d1wlja\_ d1qhta1 d4dlea1 d1tgoa1 d2f96a1  
d3tr8a1 d3mxma\_ d1y97a1 d1w0ha\_ d1kfsa1 d2py5a1 d1noya\_ d1d5aa1  
d1yt3a3 d2guia\_ d3mwpal d4kb1a\_ d1lid1a\_ d2hmta\_ d1b9ra\_ d1offa\_  
d1frra\_ d3wcqa\_ d1e9ma\_ d1wria\_ d1i7ha\_ d3av8a\_ d1czpa\_ d1rfka\_  
d3p1ma1 d3b2ga\_ d2bt6a2 d3nvva1 d1krha3 d2h88b1 d1n62a2 d1t3qa2  
d1zoyb1 d1jq4a\_ d1ffva2 d1dgja2 d1rm6c2 d1jmxal d1pbya1 d1pbya2  
d1r7ha\_ d1faaa\_ d1wika1 d1xfla\_ d1ttza1 d2f51a1 d1ti3a\_ d1nhoa\_  
d1sena\_ d2i4aa\_ d1ep7a\_ d1zmaa1 d1fo5a\_ d3lefa1 d3diea1 d2yana1  
d1z6na1 d1oaza\_ d3zywa1 d4aj8a\_ d1nm3a1 d4fiwa\_ d1wmja\_ d4hs1a1  
d1iloa\_ d1xwaa1 d1wjka1 d2vm1a\_ d1fb6a\_ d1gh2a\_ d1h75a\_ d1nw2a\_  
d1kx5b\_ d3a6na\_ d4m6ba2 d2nqbd\_ d3wkjd\_ d2yfwe\_ d4h9na\_ d5bnxa\_  
d1kx5c\_ d3r45a\_ d1eqzb\_ d4jjnb\_ d1f66c\_ d1eqza\_ d4wnnb\_ d1kx5a\_  
d1u35c1 d1lid3a\_ d2nqbc\_ d1kx5d\_ d1tafa\_ d1bh9b\_ d1tafb\_ d1q9ca\_  
d1h3ob\_ d2byka1 d1n1ja\_ d4g92b\_ d1bh9a\_ d1jfia\_ d1h3oa\_ d2bykb1  
d1n1jb\_ d1pd212 d1nhya2 d2a2ra2 d1k0dd2 d1f2ea2 d1gsua2 d1f3ba2  
d2fhea2 d2pvqa1 d1tw9a2 d1oyja2 d1e6ba2 d1k0ma2 d3ik7a1 d4is0a1

d1r5aa2 d1jlva2 d1m0ua2 d3gtub2 d1z9ha2 d1okta2 d1axda2 d2gsra2  
d1tu7a2 d1k3ya2 d1zgma1 d1gnwa2 d1gwca2 d2gsta2 d1glqa2 d1oe8a2  
d1pn9a2 d1v2aa2 d1fw1a2 d1duga2 d1liuka\_ d2csua1 d3q9ub\_ d2yv1a1  
d3q9na\_ d2d59a\_ d1oi7a1 d2yv2a1 d1y81a1 d1qqya\_ d1gd6a\_ d1ivma\_  
d2gv0a\_ d1iiza\_ d2z2fa\_ d1j8xa\_ d1ghla\_ d1b9oa\_ d1741a\_ d1691a\_  
d2o4wa\_ d1p37a\_ d1k28a3 d1xjta1 d1jtma\_ d2f2qa\_ d4e97a1 d1iyka2  
d1iyka1 d1rxta1 d1iica1 d2pjsa1 d1klla\_ d2i7ra1 d1ecea\_ d1xqaa1  
d5cj3a1 d1npba\_ d1jifa\_ d2p7oa\_ d1nkia\_ d1mpya2 d1kw3b2 d1kw3b1  
d4ghga1 d1tfza1 d3isqa1 d3isqa2 d1sqia1 d1sqia2 d1lkda2 d1lkda1  
d1mpya1 d1cjxa1 d1sp9b2 d1t47a1 d1t47a2 d1flua2 d1sp8a1 d1sp8a2  
d1flua1 d2h0va\_ d4iuua3 d4bvva\_ d5hpga\_ d3k65a\_ d1ki0a3 d1ki0a2  
d1ki0a1 d1a0ha1 d1pmla\_ d3sp8a3 d2feba1 d1qsta\_ d2beia1 d4m3sa\_  
d1u6ma1 d1yk3a1 d3dr6a\_ d1xmta\_ d1z4ea1 d2ge3a1 d1bo4a\_ d2fiaa1  
d2jdca1 d1y9wa1 d3to7a\_ d1wwza1 d2fl4a1 d2ozua1 d2b5ga\_ d2cy2a1  
d2p0wa\_ d1cm0a\_ d4pswa\_ d1yrea1 d1yr0a1 d1m4ia\_ d2gana1 d1yvka1  
d1ghea\_ d2g3aa1 d1y7ra1 d2euia1 d1q2ya\_ d2fsra1 d1xeba\_ d2ae6a1  
d1cjwa\_ d1qsma\_ d2aj6a1 d1y9ka1 d1i12a\_ d1vkca\_ d2atra1 d1n71a\_  
d2d4pa1 d2fiwa1 d2fe7a1 d1tiqa1 d2ou2a\_ d1yx0a1 d2fcka1 d1p0ha\_  
d2j8ma\_ d2pq8a\_ d1z4ra1 d1s3za1 d1ufha\_ d2hqya1 d2hqya2 d1lrza2  
d1ne9a1 d1lrza3 d1xvqa1 d1pn0a2 d3hy2a\_ d2cvba1 d1o8xa\_ d1lu4a\_  
d1we0a1 d2bmxal d2a4va1 d1psqa\_ d1xiya1 d1q98a\_ d1n8ja\_ d1zofa1  
d2ggta\_ d3tjja\_ d4je1a1 d1o73a\_ d3s9fa\_ d2zcta\_ d1qmva\_ d1jfua\_  
d2b1ka\_ d5dvba1 d2b5xa1 d2v2ga\_ d3tb2a\_ d4llra\_ d4fh8a1 d1e2ya\_  
d1knga\_ d2h30a\_ d1i5ga\_ d2z9sa\_ d2f8aa1 d1tp9a1 d2b7ka\_ d1nm3a2  
d3hvva\_ d2wfca1 d4kcea\_ d1xvwa1 d4gqca1 d3qpma\_ d4k1fa\_ d1zsoa1  
d1gp1a\_ d1prxa\_ d4od7a1 d1z6ma1 d4mcua1 d4dvca1 d1r4wa\_ d3l9sa\_  
d3rppa\_ d1rmka\_ d1ixta\_ d1eyoa\_ d1cna\_ d1fu3a\_ d1g1pa\_ d1f3ka\_  
d1fyga\_ d1e88a1 d1l6ja5 d1l6ja4 d1eaka4 d1eaka3 d1h8pa2 d1h8pa1  
d1jgta2 d1ea0a3 d1ecfa2 d1q15a2 d1ct9a2 d1ao0a2 d1te5a\_ d1ys1x\_  
d4hs9a\_ d1ex9a\_ d1ku0a\_ d3qmma\_ d1ra6a\_ d1muka\_ d3gsza\_ d1khva\_  
d1te9a\_ d2xwha\_ d3uqsa\_ d3hkwa\_ d3n6ma\_ d2cjqa\_ d2xyma\_ d1teba\_  
d1te8a\_ d1s48a\_ d1u09a1 d4wfxa\_ d3tyqa\_ d2pgga1 d2h1ia1 d2r8ba1  
d3b5ea1 d3cn9a\_ d1auoa\_ d1lgya\_ d4l3wa\_ d1llfa\_ d1gz7a\_ d1ukca\_  
d1cr6a2 d1bvsa3 d1ixra2 d1mbma\_ d3su6a1 d1cula1 d4agka\_ d1vcpa\_  
d1q31a\_ g1n11.1 d3e90b\_ d1ep5a\_ d3u1jb\_ d3zxha\_ d1cgl\_a\_ d1rm8a\_  
d1eaka2 d1hy7a\_ d2jsda\_ d1cxva\_ d1hv5a\_ d1i76a\_ d3p0ya1 d1igra1  
d1igra2 d1n8yc2 d1m6ba2 d1m6ba1 d4dv8a2 d1dzka\_ d4tlja\_ d2a2ua\_  
d4wfva\_ d3tlda\_ d4iaxa\_ d3zq3a\_ d2nnda\_ d1i4ua\_ d1kxoa\_ d1bbpa\_  
d1kt7a\_ d1exsa\_ d3s26a1 d1lf7a\_ d1qfta\_ d4gh7a\_ d1z24a1 d1qabe\_  
d1xkia\_ d1ew3a\_ d3bx7a\_ d4iawa1 d1n0sa\_ d1gkab\_ d3kzaa\_ d2k23a\_  
d2l9ca1 d2joza1 d1gm6a\_ d3kffa\_ d3saoa1 d1e5pa\_ d1yupa1 d1iiua\_  
d2tbvc\_ d1c8nc\_ d1x36a\_ d1smvc\_ d1ng0c\_ d4sbvc\_ d1lopa\_ d1f2nc\_  
d1cixa\_ d1y29a\_ d1v7fa\_ d2jtba\_ d1d1ha\_ d1g9pa\_ d1lupa\_ d1qk7a\_  
d1mb6a\_ d2a2va\_ d1niya\_ d1i25a\_ d1hvwa\_ d2mpqa\_ d1ie6a\_ d1kqha\_

d1la4a\_ d2mxa01 d1d10a\_ d1koza\_ d1qk6a\_ d1emxa\_ d1lqra\_ d1c6wa\_  
d1js9c\_ d1f15b\_ d1za7a\_ d1laja\_ d1rypd\_ d1lirua\_ d1rypc\_ d3unfk\_  
d1rypa\_ d1j2pa\_ d1lirui\_ d1j2qh\_ d3unfh\_ d1m4ya\_ d1rypb\_ d1lirul\_  
d1lirug\_ d1liru2\_ d1q5rh\_ d1rypg\_ d1g3ka\_ d1liruf\_ d1q5qa\_ d1e94a\_  
d1lirub\_ d1ryph\_ d3ty6a\_ d1liruj\_ d1liruk\_ d1rype\_ d1lirud\_ d1lirue\_  
d3mi01\_ d1rypf\_ d1liruh\_ d2z3ba\_ d1liruc\_ d3mka2\_ d1liru1\_ d1ny721  
d1ny722 d1a6ca3 d1a6ca2 d1a6ca1 d1pgl21 d1pgl11 d1ny711 d1mqta\_  
d1d4m3\_ d1fmd3\_ d2mev1\_ g1aym.1 d1ev13\_ d4q4w1\_ d1r1a3\_ d2x5ia\_  
d1rhi1\_ g1r1a.1 g1d4m.1 g1rhi.1 d1b35b\_ d1loopa\_ d1tme1\_ d4iv1a\_  
g1pvc.1 g1fpn.1 d1fpn1\_ d4gb31\_ d1d4m1\_ d1fmd1\_ d1ev11\_ d2wzr3\_  
g1cov.1 d1qqp3\_ g1fmd.1 d2x5ic\_ d1rhi3\_ g1oop.1 d1hxs1\_ g1hxs.1  
d1fpn3\_ g2mev.1 d1eah3\_ d1aym1\_ d1pvc3\_ d1qqp1\_ d1zba3\_ d1h8ta\_  
d3vbhc\_ g1b35.1 g1bev.1 d1hxs3\_ g1ev1.1 d1bev3\_ g1tmf.1 d1tmf1\_  
d1b35a\_ d2mev3\_ g1eah.1 g1h8t.1 d1eah1\_ d4q4w3\_ d1r1a1\_ d1aym3\_  
d1pvc1\_ d1zba1\_ d1h8tc\_ d1oopc\_ d1tme3\_ g1qqp.1 d4iv1c\_ g1tme.1  
d3ubub\_ d1legia\_ d1qo3c\_ d1v7pa\_ d1tdqb\_ d3ubua\_ d1c3ab\_ d1h8ua\_  
d3bx4b\_ d1t8ca1 d1sb2a1 d1qdda\_ d2ziba1 d3cada\_ d1byfa\_ d1j34b\_  
d1jwia\_ d1jzna\_ d1c3aa\_ d1oz7b\_ d1wmza\_ d3bdwb\_ d1hq8a\_ d1fifal  
d1dv8a\_ d3hupa\_ d1wk1a1 d1umra\_ d2afpa\_ d3bx4a\_ d1gz2a\_ d1sl6a\_  
d1v7pb\_ d3g8ka\_ d1ixxa\_ d1j34a\_ d1jwib\_ d1g1sa1 d1y17a1 d1ja3a\_  
d3bdwa\_ d1sb2b1 d1fvua\_ d1umrc\_ d1oz7a\_ d4m17a\_ d3cfwa1 d1ypqa1  
d1g1ta1 d3fd4a\_ d3l9jc\_ d4dn8a1 d1v41b\_ d1rd11\_ d2msba\_ d2flia1  
d1rpxa\_ d1tqja\_ d1tqxa\_ d4lt9a1 d3tc7a1 d3hoja\_ d1i4na\_ d3vnda\_  
d3n18a1 d1geqa\_ d3naval d4a2ra1 d3tc6a1 d1ujpa\_ d4ijba\_ d1xcfa\_  
d1vc4a\_ d1rd5a\_ d1qopa\_ d3b5va\_ d2r80b\_ d1cqa1 d1cg5a\_ d1gcvb\_  
d3boma\_ d2h8fb\_ d2raoa\_ d3bj1a\_ d4hrrb\_ d2r50a\_ d3d1kb\_ d2aa1b1  
d3zhwa\_ d3hf4b\_ d3gdja\_ d1jebb\_ d3bj1b\_ d1x9fb\_ d1wmub\_ d1gcva\_  
d3bcqb\_ d3d4xb\_ d1gvha1 d2dc3a\_ d3hf4a\_ d4yu3a\_ d3k8ba\_ d1qpwb\_  
d2r80a\_ d3bcqa\_ d1v4wa\_ d3wtgb\_ d1j17a\_ d4esaa\_ d1a9we\_ d3d1ab\_  
d1fsla\_ d4h21a\_ d1v4wb\_ d1mwca\_ d1vhba\_ d1jeba\_ d1spgb\_ d1h97a\_  
d1q1fa\_ d1tu9a1 d3d1aa\_ d1hdsb\_ d3hyub\_ d2zfb\_ d3fs4a\_ d1oj6a\_  
d1shrb\_ d4h21b\_ d4yu3b\_ d1spga\_ d3hrwa\_ d3qgra\_ d3at5a\_ d4wchd\_  
d3hyua\_ d1cg5b\_ d1uc3a\_ d1hbra\_ d2raob\_ d4esab\_ d3gdjb\_ d3qqqa\_  
d1x9fc\_ d3vrfa\_ d1litha\_ d3mkba\_ d3d4xa\_ d3mjpa\_ d1j16a\_ d3fh9a\_  
d1outa\_ d2dc3b\_ d1lit2a\_ d3eoka\_ d3g46a\_ d1qpwa\_ d3vrfb\_ d1ch4a\_  
d1x9fd\_ d1hdsa\_ d2zfb\_ d3mkbb\_ d1or4a\_ d3wtga\_ d1a4fa\_ d3fh9b\_  
d3bomb\_ d3cy5a\_ d3at5b\_ d1x9fa\_ d2oifa\_ d4lmb\_ d1cpcb\_ d3v57a\_  
d1kn1a\_ d1cpca\_ d4f0ta\_ d2vjha\_ d4po5b\_ d1eyxa\_ d1alla\_ d4f0tb\_  
d1b33b\_ d1b8db\_ d4h0mb\_ d1b33a\_ d2vjhb\_ d4lmb\_ d2vmlb\_ d1allb\_  
d2vjta\_ d3dbja\_ d2vmla\_ d2vjtb\_ d4f0ub\_ d1f99b\_ d4rmpa1 d1liaa\_  
d1eyxb\_ d2uulb\_ d4lmsb\_ d4f0ua\_ d2bv8a\_ d1f99a\_ d2bv8b\_ d2c71b\_  
d3dbjb\_ d4rmpb1 d1b8da\_ d4h0ma\_ d3v57b\_ d1kn1b\_ d1liab\_ d2uula\_  
d2j96a\_ d3ia2a\_ d1a88a\_ d4dgqa1 d1hkha\_ d1zoia\_ g1gxs.1 g1wht.1  
d1azwa\_ d1hlga\_ d2xqfa\_ d1f6wa\_ d1dx4a\_ d1qe3a\_ d1k4ya\_ d4qwwa\_

d2ha2a\_ d1r88a\_ d1sfra\_ d1f0na\_ d4qeka\_ d3c8da2 d2pbla1 d1jjia\_  
d1lzl1a\_ d1jjfa\_ d1jmxa4 d1jmxa3 d1pbya4 d1s5ja2 d1qhta2 d4dlea2  
d1tgoa2 d3py8a2 d1q8ia2 d1kfsa2 d2py5a2 d1d5aa2 d1f74a\_ d3l21a\_  
d2e1da\_ d1to3a1 d1w3ia\_ d1sfla\_ d1vcva1 d4imea\_ d1wa3a\_ d2ocza1  
d1f2ja\_ d3m16a\_ d2yxga\_ d1ub3a\_ d3a5fa\_ d1fbaa\_ d1l6wa\_ d1xfba1  
d1wx0a1 d1vpxa1 d1ojxa\_ d1mxsa\_ d2a4aa1 d1xkya1 d3cq0a1 d3s1xa\_  
d1f05a\_ d1fdja\_ d3cpra1 d4d2ja\_ d1cg2a1 d1yloa2 d1y7ea2 d1y0ya3  
d1lfwa1 d1vixa1 d1fnoa4 d1vh0a2 d1ysja1 d1vhea2 d1z21a1 d2fvga2  
d1vgya1 d1r3na1 d2grea2 d1xmba1 g1q7l.1 d3rp2a\_ glucy.1 d1fuja\_  
d2zchp\_ d3w94a\_ d1si5h\_ d1lo6a\_ g2pka.1 d1cgha\_ d1kigh\_ d1a5ia\_  
d3s9ba\_ d1hj8a\_ d1ao5a\_ d2anya\_ d1q3xa1 d1gvza\_ d1azza\_ d4gsoa\_  
d2f91a1 d1iaua\_ d1gdna\_ d1eufa\_ g1fiw.1 d1eq9a\_ d4nfea\_ d2rdla\_  
d1spja\_ d1elva1 d1a7sa\_ d1ekbb\_ d1pfxc\_ d1yc0a\_ d2aiqa\_ g1fiz.1  
d1fi8a\_ d4k60a\_ d4dgja\_ d1mzaa\_ d1op0a\_ d3tjva\_ d1pytd\_ d1sgfg\_  
g1gg6.1 d2eeka\_ g1rtf.1 d1a0ja\_ d3g01a\_ d1pytc\_ d4e7na\_ d1ddja\_  
d1z8ga1 d2hlca\_ d1npga\_ d1brup\_ g1jou.1 d1sgfa\_ d1autc\_ g2hnt.1  
g1kdq.1 d1orfa\_ d3s69a\_ d4crga\_ d1fxya\_ d2ftba\_ d1pmpa\_ d2rcqa1  
d1fdqa\_ d4lkpa\_ d1sa8a\_ d1vyfa\_ d1lpja\_ d3vg7a1 d4azqa1 d1o8va\_  
d5bvqa\_ d1p6pa\_ d2qo4a\_ d1opba\_ d1yiva1 d1o1va\_ d4bvma1 d4tkba\_  
d4i3ba\_ d1bwya\_ d1ftpa\_ d1ggla\_ d4gkca\_ d1cbia\_ d3p6da1 d1kqwa\_  
d2a0aa1 d1m41a\_ d2bk7a\_ d3fjua\_ d1z5ra1 d1kwma1 d1uwy2 d1jqga1  
d2c1ca1 d1dtda\_ d1h81a2 d4lu0a\_ d3unda1 d3e9aa1 d1vr6a2 d1n8fa\_  
d2qkfa\_ d1d9ea\_ d1o60a\_ d1e69a\_ d1mv5a\_ d3g60a4 glii8.1 d1ewqa2  
d1ji0a\_ d1v43a3 d2wmfa1 d1vpla\_ d1g2912 d4a82a2 g1f2t.1 d2d62a1  
d3tuic1 d2bbsa1 d3g60a3 d2ixea\_ d1g6ha\_ d1sgwa1 d2qi9c\_ d3rlfa1  
d3b60a1 d3d31a2 d2pzea1 g1xew.1 d1jj7a\_ d1oxk2 d2onka1 d1wlwa\_  
d1iwea\_ d1qf5a\_ d1vmaa2 d1nija1 d1np6a\_ d2p67a1 d3ihla\_ d1okkd2  
d1lsla2 d1slma2 d1liona\_ d2v40a\_ d1dj3a\_ d3hida\_ d2vo1a1 d2g0ta1  
d1vcoa2 d1j8mf2 d1g3qa\_ d1xjca\_ d1qzxa3 d1ihua2 d1ihua1 d2qm8a\_  
d1dj2a\_ d4ioja\_ d1cp2a\_ d1yrba2 d1hyqa\_ d3gqba2 d1skye3 d1xp8a1  
d1tf7a2 d1tf7a1 d1ye8a1 d1skyb3 d2qe7d2 d4blta\_ d4huta\_ d3l1daa2  
d4hyya\_ d2i3ba1 d1crla\_ d3j9tb2 d3ntua2 d1vdza1 d2z43a\_ d1e9ra\_  
d1nlfa\_ d3ziaa2 d1n0wa\_ d1g6oa\_ d3ziad2 d3j9ta2 d1pzna2 d3gqbb2  
d2i49a\_ d1nnfa\_ d1xvxa\_ d1lursa\_ d1h3da1 d1iuda\_ d4m1va1 d1twya\_  
d3e13x\_ d2nxoa1 d4pfua\_ d3ttma\_ d1elja\_ d2qmwa1 d1us5a\_ d1y3na1  
d1jeta\_ d1uqwa\_ d4f19a1 d2esna2 d3thia\_ d3fasa1 d2uyeb\_ d2xwva1  
d1r91a\_ d2fyia1 d1pb7a\_ d2ozza1 d1sw5a\_ d1nh8a1 d1vr5a1 d2g29a\_  
d1xs5a\_ d3lswa\_ d2z23a\_ d3w9va\_ d3tcha\_ d1q35a\_ d1z7me1 d3q27a\_  
d1p99a\_ d1ve4a1 d2i6ea1 d4mcoa1 d4n8ya\_ d1eu8a\_ d1zbma1 d1hsla\_  
d1lixca2 d1j1na\_ d1xvya\_ d1y9ua\_ d2z22a1 d1xoca1 d4oera\_ d1wdna\_  
d5f1qa1 d1xt8a1 d4gwoa\_ d4igta1 d1pc3a\_ d4mmpa1 d1o63a\_ d2cz1a1  
d2onsa2 d4mija1 d4ok5a1 d2bmfa1 d2bmfa2 d1yksa1 d1yksa2 d2qeqa1  
d2jlqa1 d1a1va2 d1eh3a\_ d3skpa\_ d1dtza1 d1dtza2 d1lieja\_ d1jnfa2  
d1ce2a1 d1jnfa1 d1b1xa2 d1jw1a1 d1jw1a2 d1ryoa\_ d1h76a1 d1h76a2

d1etha2 d1w52x1 d2pp1a1 d1hpla2 d2oxea1 d1bu8a2 d1rpla2 d1c4oa1  
d2p6ra3 d2p6ra4 d1oywa2 d1wrba1 d1w36b2 d1w36b1 d1c4oa2 d3bora\_  
d1t6na\_ d2eyqa5 d2eyqa3 d2eyqa2 d2zu6a2 d1veca\_ d1uaaa1 d1w36d1  
d2g9na1 d1z3ix2 d2rb4a\_ d1hv8a1 d1hv8a2 d1t5ia\_ d1w36c2 d2j0sa2  
d2j0sa1 d1fuka\_ d3hjha1 d1z5za1 d1qdea\_ d1z63a1 d1s2ma2 d1s2ma1  
d1wp9a1 d1wp9a2 d1gm5a3 d1gm5a4 d3dina4 d3dina3 d1q0ua\_ d1w36c1  
d1z3ix1 d1nkta3 d1nkta4 d1uaaa2 d1w36d2 g1qhh.1 d2fwra2 d2fwra1  
d3q3ma\_ d1za0a1 d1mxra\_ d2inca\_ d1jk0a\_ d2incb\_ d1mhyb\_ d3hf1b\_  
d1mtyb\_ d1r2fa\_ d2uw1a\_ d1mhyd\_ d3n37a\_ d1afra\_ d1oquc\_ d1syya\_  
d1mtyd\_ d2o1za\_ d1uzra\_ d1smsa\_ d2fkza\_ d1zuja1 d1s3qa1 d2fjca1  
d1z6om1 d1veia\_ d4dyya\_ d1jiga\_ d3gvya\_ d2pyba\_ d4cy9a1 d3bvfa1  
d1r03a\_ d2cf7a\_ d1nf4a\_ d1zs3a1 d4iwka\_ d3ka8a\_ d3np0x\_ d1n1qa\_  
d1lb3a\_ d4e6ka\_ d1z6oa1 d2fzfa1 d4dyua\_ d3ge4a\_ d1jgca\_ d4am4a\_  
d2z6ma\_ d1ji5a\_ d1vlga\_ d1lkoal d1krqa\_ d3qz3a\_ d1o9ra\_ d2ffxj\_  
d1euma\_ d1yv1a1 d2v2pa\_ d1j30a\_ d4di0a\_ d1dpsa\_ d1oewa\_ d2qzxa\_  
d2asia\_ d1psoe\_ d1miqa\_ d1smra\_ d2h6ta\_ d1pfza\_ d1lizda\_ d3hd8a\_  
d1j71a\_ d1dpja\_ d4aa9a\_ d1t6ex\_ g1b5f.1 g1lya.1 g1htr.1 d1qdma2  
d1bxoa\_ d1wkra\_ d1tzsa\_ d1libqa\_ d2qzwa\_ d1bdqa\_ d3ggta\_ d3ixoa\_  
d1mrxa\_ d2haha\_ d1tw7a\_ d4njsa\_ d1sgua\_ d2p3da\_ d1nsoa\_ d3d3ta\_  
d2rkfa\_ d1c6ya\_ d2rspa\_ d3ogpa\_ d3ekwa\_ d2o4na\_ d2j9ja\_ d1baia\_  
d3ggua\_ d3lzua\_ d4npua\_ d4j55a\_ d2r8na\_ d2fxda\_ d2p3ca\_ d4dqea\_  
d3ttpa\_ d3t3ca\_ d2p3aa\_ d2hc0a\_ d2fdda\_ d3mwsa\_ d1sr9a2 d1rqba2  
d3rcha\_ d3k40a\_ d1pmma\_ d1h4ra3 d4yl8a1 d2a16a3 d1l17ya\_ d1wgda1  
d1wggal d4q5eb\_ d1wjna1 d1se9a\_ d3n3kb\_ d1wz0a1 d1we6a1 d2m0xa\_  
d2gbka\_ d3rt3b1 d1wh3a1 d1sifa\_ d2ekec2 d4ii2b1 d4hk2a1 d1c3ta\_  
d1m94a\_ d1wghal d1ttna1 d1j8ca\_ d1wx8a1 d3v6cb1 d2ma9b\_ d4i61b1  
d1bt0a\_ d2jvca1 d1iyfa\_ d2k1fa\_ d1wxva1 d1wf9a1 d1t0ya\_ d2io0b2  
d1x1ma1 d2gbma\_ d1zw7a1 d2m17a\_ d1we7a1 d2lwp\_ d2gджа\_ d1wjua1  
d1v6ea1 d1v86a1 d4eewa\_ d1wiaa1 d4icva\_ d4gu2a\_ d1wx7a1 d1wy8a1  
d4hjka1 d2faza1 d1v5oa1 d3ruib\_ d1eo6a\_ d3waob\_ d2r2qa1 d3m95a\_  
d3wana\_ d3h33a\_ d1rwja\_ d19hca\_ d1os6a\_ d3bxua\_ d3h4na\_ d1i77a\_  
d3caoa\_ d1j0pa\_ d2ctha\_ d1duwa\_ d2e84a\_ d1hh5a\_ d1gyoa\_ d3h34a\_  
d1dszb\_ d1a6ya\_ d3cbba\_ d1ynwa1 d1r4ia\_ d1hcqa\_ d2hana\_ d2hanb\_  
d2enva1 d1kb4b\_ d2n11b\_ d1lola\_ d1cita\_ d1um8a\_ d1ixza\_ d1qvra2  
d1qvra3 d1qzma\_ d1sxjc2 d1jr3d2 d2p65a\_ d1l8qa2 d1g8pa\_ d3hu3a3  
d1sxjd2 d1njfa\_ d1in4a2 d1sxja2 d1tuea1 d2ce7a2 d1w5sa2 d1sxjb2  
d1d2na\_ d1ny5a2 d1ofha\_ d2gnoa2 d2a5yb3 d1fnna2 d1u0ja1 d1lv7a\_  
d1iqpa2 d2fnaa2 d1ixsb2 d4gita\_ d1sxje2 d2e3fa\_ d1mm0a\_ d2e3ea\_  
d2l1da\_ d2ny8x\_ d2e3ga\_ d2ny9x\_ d2nz3a\_ d2lj7a\_ d1n4na\_ d2m8bb1  
d2kyqa\_ d3psma\_ d1jxca\_ d2g11a\_ d1ugla\_ d4uj0a\_ d2k4ua\_ d1hp2a\_  
d2lu9a\_ d1baha\_ d2meoa1 d1wm7a\_ d1hlya\_ d1n8ma\_ d1jlza\_ d1wpda\_  
d1c55a\_ d1pvza\_ d1wt7a\_ d1rjia\_ d1wz5a\_ d1m2sa\_ d1pjva\_ d1c49a\_  
d1qkya\_ d2ktca1 d1wmta\_ d1j5ja\_ d1r1ga\_ d1t0za\_ d2i61a\_ d1t1ta\_  
d1sn4a\_ d1kv0a\_ d2lkba\_ d1npia\_ d1wwna\_ d1pe4a\_ d2kbka\_ d2li7a\_

d1djta\_ d2kbha\_ d1dq7a\_ d1sega\_ d1omya\_ d1zywa1 d1jzaa\_ d1t61c1  
d1iyjb4 d1iyjb5 d1iyjb3 d1o7ia\_ d4ipca1 d1x3ea\_ d4apva\_ d1jb7a1  
d1jb7a2 d1jb7a3 d3kdfa\_ d1ue1b\_ d1wjja1 d3eiva\_ d1xjva2 d1xjva1  
d2ccza2 d1se8a\_ d1l1loc\_ d1jb7b\_ d1qvca\_ d3ulla\_ d1qzga\_ d1miau4  
d1miau5 d1miau3 d1y14b1 d2nn6i1 d1i941\_ d2zjra2 d1smxa\_ d2qamc2  
d1hh2p1 d2r7da1 d1r12a2 d1wfqa1 d3bzka4 d1x6oa2 d3a0ja\_ d2j01d2  
d2ja9a1 d4q15a\_ d1hr0w\_ d1lluza\_ d2n3sa\_ d2vnud1 d1h95a\_ d1go3e1  
d2nn6h1 d1ne3a\_ d2mo1a\_ d1iz6a2 d1jjga\_ d1e3pa2 d2ix0a3 d2ix0a2  
d21xja\_ d1ueba3 d1ueba2 d2z0sa1 d1u01a1 d2ix0a1 d2eifa2 d2je6i1  
d3i2za1 d2c35b1 d2ahob2 d1t9ha1 d3i4oa\_ d2qall1 d1jt8a\_ d2nn6g1  
d1g6pa\_ d3cama\_ d1i94q\_ d1c9oa\_ d1d7qa\_ d2ba0a1 d2vnud2 d2vnud3  
d1khia2 d2qalq1 d1wi5a1 d1xtda2 d2a1ka\_ d1je5a\_ d1rpma\_ d2shpa1  
d1yfoa\_ d1l8ka\_ d2ooqa1 d1g4us2 d1p15a\_ d1lara2 d1lara1 d1wcha\_  
d2fh7a2 d2fh7a1 d3azya\_ d3wvja\_ d1upsa1 d1ajoa\_ d2hyka\_ d1ajka\_  
d2vy0a\_ d3o5sa\_ d3d6ea\_ d3atga\_ d1dypa\_ d1umza\_ d3i4ia\_ d1c1la\_  
d41bqa\_ d1a78a\_ d1slta\_ d4no4a\_ d3zsja\_ d3duia\_ d1g86a\_ d1is3a\_  
d1hlca\_ d1tdha3 d1q3ba3 d1ee8a3 d1k82a3 g1qmo.1 g1len.1 d3zyra\_  
d1fnya\_ d1n47a\_ g21tn.1 d1avba\_ d3usua\_ d1dhkb\_ d1f9ka\_ d1ukga\_  
d1g8wa\_ d1g9fa\_ d1wbfa\_ d3wcsa\_ d1g7ya\_ g1loe.1 d1mvqa\_ d1hq1a\_  
d1v6ia\_ d1dbna\_ d1qnwa\_ d1fx5a\_ d4l8qa\_ d1ioaa\_ d3n35a\_ d2h0ba\_  
d2erfa\_ d1h30a2 d1h30a1 d3mw4a1 d1pz7a\_ d2r1ba\_ d3v64a1 d3bopa1  
d3mw3a1 d1okqa1 d1okqa2 d1wioa4 d1ccza2 d1vcaa1 d1dr9a2 d2d9qb1  
d2nxyb2 d1adqa1 d1fnga1 d1uvqb1 d1zs8a1 d2vola1 d2vola2 d1mfb12  
d2jelh2 d1uwel2 d3qq4b1 d1kjbv\_ d1k5na1 d1osph2 d4odh12 d1ow0a1  
d1ow0a2 d1bfob2 d3l9ra2 d3jtth1 d2fath2 d4elkb2 d1fn4b2 d2xfxb\_  
d1pg7x2 d4k71b2 d1lk2a1 d1eapb2 d4lfhg2 d1i4fa1 d2nw2a2 d1kfah2  
d1mhca1 d1h3ua1 d1wejh2 d1h0db2 d1a5fh2 d1kcvh2 d1mjuh2 d1qqda1  
d1kcrh2 d1k8ia1 d3huja2 d2nnab1 d1nfd2 d3mffb2 d1s9va1 d1lk3h2  
d1q0xl2 d1fv1b1 d1neza1 d4rfeb2 d1r3ha1 d1a6tb2 d1kjva1 d1pz5b2  
d1onqa1 d2bc4a2 d1de4a1 d1k8da1 d1tcra2 d1dn0b2 d1nfde2 d2xwtb2  
d1bfoa2 d1mexh2 d1iakb1 d1ypzf2 d4f7ea2 d1q72l2 d2fbjh2 d1fe8h2  
d1clzh2 d1fngb1 d1uvqa1 d1vgka1 d1c16a1 d4j12a2 d4x99b2 d1igtb3  
d1je6a1 d1q72h2 d1nldh2 d1teth2 d2hmic2 d1ilca2 d1ilca1 d1k8ib1  
d1q0yh2 d1kfa12 d3frua1 d1pg7w2 d1u58a1 d1igyb4 d1igyb3 d1hyrc1  
d1klub1 d1deeb2 d1c12b2 d2bc4b2 d2ig2h2 d1kcvl2 d3wn5b1 d1lk2b\_  
d1lk3l2 d1mjul2 d1sm3h2 d1q0xh2 d1zvsal d1ydpal d1u8ib2 d1ypze2  
d1kcu2 d1op9a\_ d1y0la1 d1etzb1 d1legj11 d2gsib1 d1nj9a1 d4jfhd1  
d1aqk11 d1t2ja\_ d1lo4h1 d1zvya1 d3v4v11 d4enec1 d1kxtb\_ d5e8ea1  
d2pxya\_ d4weud\_ d1xiwc\_ d2esvd1 d1qnzh\_ d1logae1 d1f4xh1 d4n1hb\_  
d3ezjb1 d3mlw11 d1kfah1 d1etza1 d1b4jh1 d3cfic\_ d4w68a\_ d2arja1  
d1ek3a\_ d2ok0l1 d1vera\_ d1uwgh1 d1blnb1 d1fpth1 d1rzga1 d2giya1  
d4m3kb1 d1nc2a1 d2nyyd1 d1ncna\_ d1fbih1 d5dxwa\_ d4fqqa1 d1dqdh1  
d1jfq11 d1kelh1 d1faih1 d1frgl1 d1figl1 d4m6n11 d1fo0a\_ d4hxb11  
d3b5ga\_ d3quyd1 d2h9gb1 d1i8kb\_ d2dd8h1 d2ck0h1 d1lea\_ d4w6wb1



d2a6ib3 d1t66d1 d2e27h\_ d1ob1b1 d1f11b1 d2v7na1 d1ad0a1 d2xt1b1  
d1pskh1 d4i13b1 d2op4l1 d1a0ql1 d1uwell d1za3a1 d1ncbl1 d4uu9a\_  
d1bm3h1 d1cloh1 d1nqba2 d1cf8h1 d4y5va\_ d1mhph1 d5anma1 d4cdgc1  
d4ldeb\_ d1y01b1 d2pcpb1 d1z3gl1 d1dfb11 d1fh5h1 d3g5xa1 d1tzib1  
d4dn3l1 d3zhka1 d2b1hh1 d2uy1a1 d1f3dh1 d1nj9b1 d2agjh1 d2h1pl1  
d1q72h1 d8fabb1 d1ndmb1 d1rjca1 d4u6hb1 d3upca\_ d2fbj11 d1osph1  
d1tvda\_ d2cjev\_ d4fhbd1 d1bd2d1 d1rz7h1 d3nn8a\_ d1blna1 d1knoa1  
d1nfda1 d2bmkb1 d1dq11\_ d1igyb1 d1igf11 d12e8h1 d3utza1 d1nc2b1  
d1rihh1 d4mwfb1 d4jvpa1 d1mieh1 d1rhfa1 d1fgn11 d1sbsh1 d1lp9e1  
d1dn0a1 d4lqf11 d1iaih1 d1kgcd1 d1mh5b1 d1gpo11 d2g60h3 d1f8t11  
d2jixd1 d4grwh\_ d1fo0b\_ d1bfob1 d1axsa1 d1u9ka\_ d1nmbh\_ d1h8na1  
d1h8na2 d1jguh1 d4eura1 d3sdy11 d35c8h1 d1w7211 d1mvub\_ d1i9rh1  
d1ob1a1 d4wenb\_ d1yeeh1 d3ietc1 d1f58h1 d1ad0b1 d1mqk1\_ d1nbvh1  
d4b50a\_ d3r8bb\_ d1baf11 d1mamh1 d4rgne1 d2gsgb\_ d35c811 d1bafh1  
d1ai1h1 d2pcpa1 d2fath1 d2x1pa\_ d1orsb1 d1ibgl1 d1shma\_ d1a2yb\_  
d1u0qa\_ d2coqa\_ d1hilb1 d1qfwi\_ d1jv5b\_ d1fn4b1 d5e0qa\_ d1nsnh1  
d1plgl1 d4ocxl1 d1kb5h1 d1rzfh1 d1pg7x1 d2fx7h1 d2oi9c\_ d1l7il1  
d3eyva1 d1d5il1 d4ffyl\_ d1tet11 d1a6wh\_ d1ac6a\_ d3dvfa\_ d1nfde1  
d1mimh1 d1ri8a1 d1jhlh\_ d3dura\_ d1fskb1 d1f97a1 d3so3b1 d2ak4d1  
d1lp9f1 d4z7wf1 d1l7th1 d4y5ya\_ d4x7ec1 d1emth1 d1ikfl1 d1nlbh1  
d4utal1 d1bjma1 d1eapb1 d1u6ah1 d2dtgd1 d1kj2b\_ d1xeda1 d1c1eh1  
d1fgvh\_ d2bnub1 d2fb4h1 d2dtgb1 d1ktrh\_ d1jpth1 d1qkz11 d4hepg\_  
d2atpb1 d1flrh1 d2hrp11 d1mvfa\_ d1iaim1 d3k80a1 d2jb5h1 d3zkxc\_  
d4grwe\_ d1it9h1 d1rhhb1 d3w9ec\_ d1e4wh1 d1sy6h1 d2j6eh1 d3qxta\_  
d1jglh1 d1p7ka1 d1tzhb1 d4n8pa1 d1gaf11 d2jelh1 d1wioa2 d4i0cc1  
d1cicb1 d1lmka2 d1lmka1 d1iqwh1 d1orqb1 d1ejoh1 d1jnlh1 d4zg1a\_  
d43c9b\_ d1ggbl1 d1wejh1 d3q6fa1 d1f3dj1 d3c61a1 d1bqlh1 d3p9wb\_  
d1a3r11 d1h0db1 d2uzil\_ d1eo811 d1qfw1\_ d1n7m11 d1igja1 d1c5ch1  
d2a9mh\_ d1rmfh1 d1fj1b1 d4heme\_ d1ccza1 d1a5fh1 d1logad1 d1dlfh\_  
d1qa9b\_ d1vgel1 d3qskb\_ d1sjxa\_ d4ozfg1 d1sq2n\_ d1qd0a\_ d1kcvh1  
d1c5db1 d3qcul1 d8faba1 d3bn9d1 d1mjuh1 d4y8dc\_ d7fabh1 d3dvgb1  
d1lo0l1 d1a6tb1 d1gigh1 d1kcrh1 d2hwz11 d1yjdc1 d3clfl1 d4krna\_  
d1d17l\_ d1e6ol1 d1mexh1 d3r0ma\_ d4kkna\_ d1fns11 d1oaqh\_ d1rzia1  
d1ucbh1 d1ncw11 d4b41a\_ d1nfd11 d2mpah1 d2d7t11 d4grwf\_ d4b5ea\_  
d1lk3h1 d3u79a\_ d4u3xa\_ d1ghf11 d1bvkb\_ d1mcww1 d1b88a\_ d1jrhh1  
d32c2b1 d4wemb\_ d1dsfh\_ d1op3h1 d1ce111 d1iqda1 d1qoka1 d1qoka2  
d1qfuh1 d2crya1 d1ay1h1 d1oaql\_ d3ab0b\_ d1rur11 d1t4kb1 d1bz7b1  
d1n0xh1 d1for11 d1ucb11 d4w6yb\_ d43c9a\_ d2aab11 d1tzia1 d4n1ca\_  
d1k6qh1 d3g9ab\_ d4tvsa1 d1lignh\_ d1pz5b1 d3dx9a1 d3wxwh\_ d1nakh1  
d1kcul1 d3eaka\_ d4qlra1 d1cr911 d1d9ka\_ d1f4x11 d1deea1 d2i27n2  
d1c12a1 d2orbl1 d1j8hd1 d1mcph1 d1c5da1 d1kenh1 d1bd2e1 d1h5ba\_  
d4x7fc1 d3upaa\_ d1t3fa1 d1indh1 d2dtgc1 d4hc111 d1zv5a1 d4wgvb\_  
d1uwgl1 d4f37k1 d1aqkh1 d1vesa\_ d3zkqd\_ d1fpt11 d1lo4l1 d1knob1  
d3rrqa\_ d1ct8b1 d4orz\_ d1mlbb1 d4hgkc1 d1dqdl1 d1bogb1 d4ozhe1

dldr9a1 dli7za1 dldn0b1 dlkell1 dlrzib1 dlypzf1 dlwtla\_ dlhkfa\_  
dlfail1 dlfigh1 d2vyre\_ dlsjva\_ dllohqa\_ dlbfoa1 dlpkqb1 dlmjull1  
dlb4jl1 dlnsnl1 d2arjb1 dlP4bh\_ d4aj0a\_ d3nn8b\_ d2rcja1 dlF2xk\_  
d4v1dd\_ dladqh1 d2eksa\_ d4k3ga\_ dljfqh1 dluweh1 dlfrgh1 d4gftb\_  
dluz8b1 d4nlea\_ dlbm3l1 dlclol1 d3mcka1 d2vq1a1 d1ae6h1 d4aq1b1  
dluj3b1 dlbnqa1 dlfh5l1 d2ck0l1 d2ywza\_ dlq72l1 d4nbxb\_ dlhila1  
d4hz1b1 d2j88l1 dlzmya1 dlcd0a\_ d1a4ka1 dlpskl1 d1a0qh1 d4krmb\_  
dlncbh1 d2fbjh1 dlj8he1 dli3ua\_ dlcf8l1 dlfe8h1 d2plya1 d2x89a\_  
dlol0a\_ d2r0lh1 dlub5a1 dldfbh1 d3eyvb1 d4jdvb1 d4p2cg\_ d2gsia1  
d2agjl1 dlu3ha1 d2h1ph1 dlrihl1 dlfskc1 dlboga1 d2a77l1 dlosp11  
dlqfoa\_ d3dwta\_ d2fx7l1 dlrz7l1 d3stba1 dlpkqa1 dlb6da1 dlDzba2  
dlDzba1 dlkj2a\_ d4l1ha\_ dlrzgb1 dlDqlh\_ dl2e8l1 dlmiel1 dljmaa\_  
dlsbs11 dlfgnh1 dlF58l1 dlmqkh\_ dlndgb1 d3qegl1 dliai11 d2aw2a1  
dlTqbc1 d3fo2a1 d4dkaa\_ dlF8th1 d2g60l1 d2ywya\_ dluj3a1 dlYc7a\_  
d3bd3a\_ d4w6xb1 dlNmb1\_ dli8ka\_ dlrjlb1 dlypze1 dlP7kb1 dlKxqe\_  
dlgpoh1 d2z4qa1 dlw72h1 dli9rl1 d4qgya1 d4xt1c\_ d2qqnh1 dlCical  
d3c08h1 d2cd0a\_ d2bdnh1 dlhnga1 dlmam11 dlnldh1 dlcr9h1 d4lcih1  
d3bkyh1 d3qg7l1 d1ai1l1 dlkxvc\_ d4iosd\_ dl17ih1 d2x1qa\_ dlub6b1  
d3k74b\_ dl1bgh1 dlTeth1 dl1gya1 dlhxma1 d2x6ma\_ d2e7la\_ d5e03a\_  
dlqfwm\_ d2r0kh1 dl1gjb1 dlRurh1 dlplgh1 dlmj8h1 dlyuhb1 d3fmgl1  
dlrzfl1 dlEmtl1 dlad9b1 dl1gtb1 dlnlbl1 dlD5ih1 d3k7ua\_ d4ffyh\_  
dlbwwa\_ d3dvga1 d1a6ta1 dlfgvl\_ d4qxgl1 dlmim11 dljh11\_ d2hffb1  
d2hh0l1 dlqkzh1 dl17tl1 dlafvh1 dliaii1 d2cjuh\_ dlum5h1 d2ghwb2  
d2ghwb1 dlkgce1 d2fgwh1 dl1kfh1 dlDvfd\_ d2i24n1 d2xtjb\_ dlza3b1  
d2yc1a\_ d2hh0h1 d2x1oa\_ dlbvka\_ dlrjla1 d5e7ba1 dl1gta1 dl1l1b1  
d2fb4l1 dlmvua\_ dljpt11 d32c2a1 dlfvca\_ dl1qdb1 d2hrph1 d2p4ab\_  
d4qola\_ dlP2cb1 dlwt5c\_ dlT4ka1 d5c1mb\_ dlit9l1 dlbz7a1 dlb2wh1  
dlE4wl1 dljnl11 dlYedb1 dlza6b1 d3u7aa\_ dl1gfh1 d3gnml1 dlorsa1  
dlwejl1 d1a2ya\_ dlhxmb1 dlgafh1 d2j4wh1 dlPz5a1 dlj05a\_ d1a3rh1  
d4fq1l1 dlqfwh\_ dlEo8h1 dlN7mh1 d4s11a\_ dlkegh1 d5da4a\_ dl1qwl1  
d3whxb1 dlVgeh1 dldeeb1 dlC12b1 dlT2ql1 dlad9a1 d3gsnb1 d3b2uc1  
dlggbh1 dlT3fb1 dlNak11 d4ocmc\_ dl1lila1 d2v7hb3 d2esve1 dlmcoh1  
d2qr0b1 d2q3aa\_ dlct8a1 dlkcr11 d2pxyb\_ d2uzih\_ d5c3ld\_ d3durb\_  
dlc5cl1 d2ak4e1 dlDl7h\_ dlxiwd\_ dlmlba1 dlrmfl1 dl17zb1 dlDlfl\_  
d2xa3a\_ d5bq7b1 dlDqqb1 d3h42l1 dlEgjh1 dlkcv11 dlfe8l1 d2j6el1  
dlf3rb2 dl1k3l1 dlsm3h1 dlq0xh1 dlghfh1 d7fab11 dl1gch1 dl1o0h1  
d4idla\_ d5c2bl\_ dljrhl1 dl1lla1 d3zhda1 d4kfzc\_ dlb0wa\_ dlE6oh1  
dlmex11 d4krpb\_ dlfnsh1 dlncwh1 d4hgma\_ d4eigb1 d4rzca\_ d2mpa11  
d4y5xa\_ d5en2b1 d3lrga1 d4ej1c1 dlrhha1 dlj05b\_ dlforh1 dlq9wb1  
d2wzpd\_ d2aq2a1 dlh0da1 d3revb1 d2ij0c1 dlTzha1 d4m7jl1 dlk6ql1  
d3b9kc1 dl1gml\_ d3qeua1 dlDsf1\_ dlce1h1 dlkcuh1 dlzvha1 dlzvoa1  
dlTqbb1 dlay1l1 d2qsc11 d2cgrh1 dlNl0h1 dlken11 d3eo0a1 d4n9ob1  
dlN0xl1 d3k1kc\_ d2cqva1 dlfhga\_ d2k1ma\_ d2dl2a1 dlbiha3 dlbiha1  
dlbiha4 d3qp3a1 dlglca\_ dlGxea\_ dlcvsc2 dlcvsc1 dlxmwa2 dlm4ka2

d2otpa2 d1biha2 d1rhfa2 d2fcba2 d2fcba1 d1wwbx\_ dlgsma2 dlepfa1  
dlepfa2 d2dava1 d1waaa\_ d1f97a2 d1x44a1 d1vcaa2 d1fnla2 d1fnla1  
d3b5ha2 d3h8na2 d3h8na1 d1jbja1 d1jbja2 d1pd6a\_ d1f2qa2 d1f2qa1  
d3cx2a\_ d1nbqa2 d3b5ha1 d1n26a1 d1xiwb\_ d1xaau\_ d1fltx\_ d2ifga1  
d1olla1 d1olla2 d1cs6a4 d1cs6a3 d1cs6a2 d1cs6a1 d2gw5a2 d1sy6a1  
d1xiwa\_ d1ucta2 d1ucta1 d1ry7b2 d1gl4b\_ d1qz1a3 d1olza1 d2c9aa1  
d1wwca\_ d2aq2b1 d1ck1a1 d1enfa1 d1i4pa1 d1vloa1 d1et9a1 d1esfa1  
d2g9hd1 d4ohja1 d1bxta1 d1eu3a1 d1ty0a1 d1fnua1 d2qaln1 d1c4qa\_  
d1prtcl d2wv6d\_ d1prtfl\_ d4l63b1 d1r4pb\_ d1prtd\_ d1tl0f\_ d2bosa\_  
d1prtbl d3chbd\_

**Family-58 (c.3.1.2)**

**Positive dataset contains 6 protein sequences.**

d2f5va1 d3c96a1 d2gmha1 d2dw4a2 d2ivda1 d2voua1

**Negative dataset contains 3870 protein sequences.**

d1m32a\_ d1libja\_ d1c7na\_ d1iuga\_ d4q75a\_ d2bkwa1 d1t3ia\_ d1n8pa\_  
d1qz9a\_ d1jff9a\_ d1leg5a\_ d1p3wa\_ d3kgwa\_ d1cl1a\_ d2ctza1 d1vjoa\_  
d2rfva\_ d1gc0a\_ d1cs1a\_ d1d2fa\_ d2ch1a1 d1qgna\_ d1pffa\_ d1u08a\_  
d1lc5a\_ d2ay1a\_ d1bw0a\_ d3pd6a\_ d7aata\_ d2csta\_ d1j32a\_ d1fg7a\_  
d4wlha\_ d1o4sa\_ d1v2da\_ d1gdea\_ d1m6sa\_ d1v72a1 d1svva\_ d1ajsa\_  
d1wsta1 d2f8ja2 d1lk9a\_ d1vp4a1 d1xi9a1 d2gb3a1 d1yaaa\_ d1jx4a2  
d3gv5b1 d1t94a2 d3bq0a2 d3i2ka1 d1mpxa2 d2cfba1 d1o69a\_ d1bj4a\_  
d3k28a\_ d2bwpa\_ d3lg0a\_ d2fnua\_ d3ou5a\_ d1z7da1 d1b9ha\_ d1iaya\_  
d4msoa\_ d1bs0a\_ d1s0aa\_ d1sffa\_ d3tqxa\_ d1mdoa\_ d3qboa\_ d3pgya\_  
d1bjna\_ d2dkja\_ d1ejia\_ d1vefa1 d4wxga\_ d3bs8a\_ d3gbxa1 d1w23a\_  
d2b5aa1 d2ofya1 d4mcxa\_ d2xi8a\_ d2icta\_ d2bnma1 d2ppxa1 d1y7ya1  
d1f56a\_ d1bypa\_ d1azca\_ d1ws8a\_ d3u25a\_ d1cuoa\_ d1lid2a\_ d1rkra\_  
d2iaac\_ d4dp1x\_ d1nwpa\_ d2gima\_ d2i7sa\_ d1qhqa\_ d3ehbb1 d1fftb1  
d1gyca3 d1hfua2 d1kbva1 d1kbva2 d1sdda1 d1sdda2 d1gyca1 d1gyca2  
d1mzya1 d2bw4a1 d1aoza1 d1aoza3 d1aoza2 d1kyaa2 d1kyaa3 d1mzya2  
d4e9sa1 d1sddb1 d1sddb2 d1hfua1 d1hfua3 d1oe1a2 d1oe1a1 d1v10a2  
d1v10a3 d1v10a1 g1f8v.1 d1novc\_ d2bbvc\_ g1or0.1 g1cp9.1 g1e3a.1  
d3sxwa1 d4luka\_ d1a3qa1 d1iknc\_ d3brda1 d1p7h11 d1oy3c\_ d1gjia1  
d1zk9a1 d2cxka1 d2bema\_ d1pama1 d1ea9c1 d1qhoa1 d2fhfa2 d2fhfa1  
d1k3ia1 d1j0ha1 d1cxl1a1 d2bhua1 d1edqa1 d1flsa2 d1ut9a2 d1gvia1  
d1txka1 d1adqa1 d1fnga1 d1uvqb1 d1zs8a1 d2vola1 d2vola2 d1mfb12  
d2jelh2 d1uwel2 d3qq4b1 d1kjvb\_ d1k5na1 d1osph2 d4odh12 d1ow0a1  
d1ow0a2 d1bfob2 d3l9ra2 d3jtth1 d2fath2 d4elkb2 d1fn4b2 d2xfxb\_  
d1pg7x2 d1cqka\_ d4k71b2 d1lk2a1 d1eapb2 d4lfhg2 d1i4fa1 d2nw2a2  
d1kfah2 d1mhca1 d1h3ua1 d1wejh2 d1h0db2 d1a5fh2 d1kcvh2 d1mjuh2  
d1qqda1 d1kcrh2 d1k8ia1 d3huja2 d2nnab1 d1nfd2 d3mffb2 d1s9va1  
d1lk3h2 d1q0x12 d1fv1b1 d1neza1 d4rfeb2 d1r3ha1 d1a6tb2 d1kjva1  
d1pz5b2 d1onqa1 d2bc4a2 d1de4a1 d1k8da1 d1tcra2 d1dn0b2 d1nfde2  
d2xwtb2 d1bfoa2 d1mexh2 d1iakb1 d1ypzf2 d4f7ea2 d1q72l2 d2fbjh2  
d1fe8h2 d1clzh2 d1fngb1 d1uvqa1 d1vgka1 d1c16a1 d4j12a2 d4x99b2

d1igtb3 d1je6a1 d1q72h2 d1nldh2 d1teth2 d2hmic2 d1ilca2 d1ilca1  
d1k8ib1 d1q0yh2 d1kfa12 d3frua1 d1pg7w2 d1u58a1 d1igyb4 d1igyb3  
d1hyrc1 d1klub1 d1deeb2 d1c12b2 d2bc4b2 d2ig2h2 d1kcvl2 d3wn5b1  
d1lk2b\_ d1lk3l2 d1mjul2 d1sm3h2 d1q0xh2 d1zvsa1 d1ydpal d1u8ib2  
d1ypze2 d1kcuh2 d1zx5a1 d1qwra\_ d2phla2 d2phla1 d1fxza2 d1fxza1  
d1lrha\_ d1uija1 g1dgw.1 d2v09a\_ d1uika2 d1uika1 d1dgwa\_ d1lep0a\_  
d2pa7a1 d1wlta1 d1nxma\_ d2c0za1 d1g0da1 d4mh8a\_ d1mu2a2 d4i7ga1  
d1tafa\_ d1bh9b\_ d1tafb\_ d1jfib\_ d1q9ca\_ d1h3ob\_ d2byka1 d4g92b\_  
d1bh9a\_ d1jfia\_ d1h3oa\_ d2bykb1 d1n1jb\_ d2bjca1 d2hsga1 d1qpza1  
d1efaa1 d1ydwa2 d2nvwa2 d1h6da2 d1zh8a2 d1qkia2 d1xeea2 d1t1ta2  
d1au7a2 d1lic8a2 d3gpdg2 d2q49a2 d1hdgo2 d2g17a2 d2cvoa2 d2czca1  
d3pwka2 d1obfo2 d1i32a2 d1zyao2 d2pkqo2 d1b7go2 d2hjsa2 d1cf2o2  
d1vkna2 d1nvmb2 d2m9wa1 d3dfxa\_ d2msya\_ d2djoa1 d2r5za\_ d1au7a1  
d1f43a\_ d2lmda1 d1akhb\_ d1s7ea1 d3nara\_ d1zq3p1 d2craa1 d1mija\_  
d4uuta\_ d3a01a\_ d1x58a1 d3rkqa1 d3cmya1 d2cqa1 d2da6a1 d1e3oc1  
d1fjla\_ d1mh3a1 d1ig7a\_ d1x41a1 d1wh7a1 d1gt0c1 d2mw8a\_ d1lfup\_  
d1x2ma1 d1b72a\_ d1wi3a1 d1jgga\_ d1wjha1 d1x2na1 d1mnmc\_ d2cuea1  
d3k2aa\_ d2hosa\_ d2jwta2 d1pufa\_ d1octc1 d2hi3a\_ d1b8ia\_ d4j19a\_  
d3lnqa\_ d1wh5a1 d1b8ib\_ d1fexa\_ d2cqra1 d1guua\_ d1ug2a1 d2cqqa1  
d2ajea1 d4a69c\_ d1h8ac1 d2crga1 d2iw5b1 d1xc5a1 d1ofcx1 d2cu7a1  
d1wgxa1 d2cjja1 d2ckxa1 d1gvda\_ d1hcra\_ d1tc3c\_ d1gdta1 d1u78a2  
d6paxa1 d6paxa2 d1k78a1 d1igna2 d1prt2 d3lv8a\_ d1s3ga1 d1zaka1  
d1s4qa\_ d3tvta2 d1uf9a\_ d1khta\_ d1ckea\_ d1osna\_ d1p5zb\_ d4tmka\_  
d3cm0a\_ d1tmka\_ d1jaga\_ d3h86a\_ d1t0hb\_ d1nn5a\_ d2h92a\_ d3kb2a1  
d2c95a1 d1yj5a2 d1kgda\_ d1ly1a\_ d2ak3a1 d1vyva2 d1deka\_ d2grja1  
d1p3ja1 d1y63a\_ d1e4ya1 d1s96a\_ d3iija1 d1lvga\_ d1nksa\_ d1vyua2  
d4e22a\_ d1qf9a\_ d1jjva\_ d1q3ta\_ d1ki9a\_ d1lw7a2 d1teva\_ d1kjwa2  
d1gsia\_ d2iyva2 d1kaga\_ d1viaa\_ d1e6ca\_ d1g3ma\_ d1j99a\_ d1t8ta1  
d1nsta\_ d1fmja\_ d1zrha\_ d1ls6a\_ d2a3ra\_ d1aqua\_ d2zptx\_ d3ckla\_  
d1texas\_ d2gwha\_ d1odfa\_ d1uj2a\_ d4gi7a\_ d2jeoa1 d1z0ja1 d3umra2  
d3gj0a1 d2gaoa1 d1yzga1 d1x3sa1 d1g7sa4 d1puja\_ d1udxa2 d1kk1a3  
d2o52a\_ d1jwyb\_ d1zcaa2 d1zcba2 d2fv8a1 d2cjwa\_ d3dz8a1 d1xzpa2  
d1vg8a\_ d4qxaa\_ d2ew1a1 d1x1ra1 d2bcgy\_ d3doea1 d3cona\_ d3rega\_  
d3wyga\_ d1upta\_ d2b6ha1 d1zd9a1 d1lnza2 d1r5ba3 d1n0ua2 d1r2qa\_  
d2f91a1 d2rhda\_ d3q3jb\_ d3q85a\_ d1efma1 d1r8qa\_ d2gf9a1 d2akab1  
d1ek0a\_ d1z08a1 d2gcoa1 d2dy1a2 d4g01b\_ d2cxa1 d1svia\_ d3q72a\_  
d1ni3a1 d4ac9a4 d2erxa1 d2bmea\_ d1wxqa1 d2gf0a1 d4ldja1 d1zunb3  
d1d5ca\_ d4lv5b\_ d1efca3 d1kmqa\_ d2g6ba1 d3lrpa\_ d1tada2 d2y8ea\_  
d4rd4a1 d1z06a1 d2heia\_ d3a58b\_ d1u0la2 d1d2ea3 d1zj6a1 d2ocba\_  
d3rwoa\_ d1mr3f\_ d2e9sa1 d4u5xa1 d2iwra\_ d2fn4a1 d3bwdd\_ d2nzja1  
d2atva1 d2ksqa\_ d3l43a\_ d1mkya2 d1mkya1 d1wmsa\_ d1jnja3 d2rmka\_  
d1f6ba\_ d1f60a3 d1gota2 d1jala1 d2fh5b1 d1g16a\_ d2wblc\_ d1m7ba\_  
d1wf3a1 d1f5na2 d1t9ha2 d1z6xa1 d1z0aa1 d2fg5a1 d2a5ja1 d2bcjq2  
d1s0ua3 d1ky3a\_ d4y0va\_ d4lhwa\_ d2qmea1 d2atxa1 dlegaa1 d1ryha\_

d1moza\_ d1nrjb\_ d2erya1 d3bfka\_ d1puia\_ d1fzqa\_ d3j3az1 d3t5ga\_  
d1shza2 d3defa\_ d2f7sa1 d3raba\_ d3tsoa\_ d3aq4a\_ d2a17a1 d3sfva1  
d3bc1a\_ d2ncda\_ d1sdma\_ d3h4sa1 d2heha\_ d2grya\_ g3kin.1 d1kk8a2  
d1br2a2 d1goja\_ d1f9va\_ d2mysa2 d1lkxa\_ d3t0qa\_ d4db1a1 d3gbja\_  
d1ry6a\_ d1k8ka2 d1k8ka1 d3uleb1 d3i33a2 d3i33a1 d1bupa1 d1dkgd2  
d1dkgd1 d4ci6a2 d1jcfa1 d4a2ba2 d2fxua1 d1yaga2 d1yaga1 d4cbua2  
d1bupa2 d3vrda1 d3vrda2 d1fcdc2 d1fcdc1 d1h1oa2 d1h1oa1 d1m70a2  
d1ig8a1 d1czan2 d1czan3 d1czan1 d1ig8a2 d1czan4 d1bg3a4 d1bg3a3  
d1bg3a2 d1nira1 d1qksa1 d3h1jd1 d2d0oa3 d2d0oa2 d1nbwa3 d1hroa\_  
d4gedb\_ d3zooa\_ d1mz4a\_ d1gu2a\_ d1f1fa\_ d1dvva\_ d1c6ra\_ d1c75a\_  
d1e29a\_ d1gdva\_ d1cnoa\_ d1h32b\_ d1co6a\_ d2bh4x\_ d2aiua\_ d5cytr\_  
d1jdl\_ d1i8oa\_ d2zboa\_ d3dmia\_ d1ls9a\_ d1wvec\_ d2yk3a\_ d3ph2b\_  
d1dw0a\_ d5aura\_ d1ql3a\_ d1qn2a\_ d1f1ca\_ d2nqya\_ d1h4ga\_ d1oa2a\_  
d1olra\_ d3b7ma\_ d4h7ma1 d3wp3a\_ d2vgda\_ d1igoa\_ d3zsea\_ d2nlra\_  
d3wx5a\_ d1oa3a\_ d1pvxa\_ d1m4wa\_ d1f5ja\_ d1oa4a\_ d1ks5a\_ d4ixla1  
d2ah2a1 d1n1ta1 d1evsa\_ d1cnt1\_ d1pvhb\_ d1z7ca\_ d1huwa\_ d1bgea\_  
d1rhga\_ d1f6fa\_ d1f45b\_ d1ilrb\_ d1axia\_ d1letea\_ d3tgxb\_ d1scfa\_  
d2z3qa1 d3qb1a\_ d1hula\_ d1m48a\_ d4nkqb\_ d1eera\_ d1v7mv\_ d5e4ea\_  
d2o27a\_ d3b5ka\_ d2psma1 d4zf7a\_ d3uf5a\_ d4x51a\_ d1d9ca\_ d4ypgc1  
d3oq3a\_ d1lqsl\_ d1n1fa\_ d1aula\_ d1wu3i\_ d3bes1\_ d3ux9a\_ d1v8fa\_  
d2ejca\_ d3muea1 d1ihoa\_ d3q12a1 d4dnxa2 d1m8pa2 d1g8fa2 d1jhda2  
d1x6va2 d3rbaa\_ d2qtra\_ d1nupa\_ d3l92a\_ d1f9aa\_ d1qjca\_ d2h29a\_  
d1vlha\_ d1od6a\_ d1lw7a1 d1mrza2 d4ruka\_ d3wdpp1 d3wq5a\_ d1gnxa\_  
d4gxpa\_ d4hz8a\_ d1e4mm\_ d3aiua\_ d1wcca1 d1qvba\_ d3ahxa\_ d1v02a\_  
d2dgaa\_ d1pbga\_ d1vffa1 d1qoxa\_ d4ha4a\_ d2el7a\_ d1iq0a2 d1irxa2  
d1r6ta2 d1ivsa4 d2cyba\_ d1rqga2 d1j09a2 d2yxna\_ d1f7ua2 d1h3fa1  
d1ffya3 d2g36a1 d1nzja\_ d1n3la\_ d1i6la\_ d1pfva2 d1h3na3 d3n9ia\_  
d3sz3a1 d3sw2a\_ d1moxc\_ d1dx5i3 d1edmb\_ d1autl2 d1autl1 d1nqlb\_  
d1dval1 d1szba2 d1kigl\_ d2y5f1\_ d1ijqa2 d1gk5a\_ d1g1sa2 d1nt0a3  
d1lmja2 d1lmja1 d1nzia2 d2wphe\_ d1klil\_ d1pfxl2 d1pfxl1 d1p9ja\_  
d1g1ta2 d1f7ea\_ d4yzub\_ d1nuba2 d1m1xb5 d1qx2a\_ d2y5ia\_ d1qlsa\_  
d1psra\_ d3n22a\_ d2egda\_ d4ggfc\_ d2wcea\_ d2luca\_ d4aqia\_ d3nsia\_  
d2lp3a\_ d1j55a\_ d1a4pa\_ d1k8ua\_ d1nsha\_ d1exra\_ d1tiza1 d1nyaa\_  
d1g8ia\_ d1ggwa\_ d1wdcc\_ d3fwba\_ d1ggza\_ d2o5ga\_ d1ctaa\_ d1m45a\_  
d3i5gc\_ d1sl8a\_ d1fpwa\_ d2scpa\_ d2roaa\_ d4aqra\_ d3pn7b\_ d1br1b\_  
d2mysb\_ d1s6ca\_ d1bjfa\_ d2obha\_ d1jfk\_ d1jfoa\_ d1qv0a\_ d1lkja\_  
d2mlfc\_ d2m97a\_ d2d8na\_ d4by5a\_ d1jbaa\_ d4nqga\_ d1wdcb\_ d2mysc\_  
d1j7qa\_ d1s6ia\_ d1uhka2 d1r2ua\_ d1dtla\_ d3kf9a\_ d3pn7c\_ d1gjya\_  
d1y1xa\_ d1hqva\_ d1dvia\_ d1df0a1 d1qxp2\_ d4usla\_ d1k94a\_ d1wkya2  
d1uuqa\_ d3wh9a\_ d4m1ra\_ d4xuya\_ d2je8a5 d4bf7a1 d3cuia\_ d1ur4a\_  
d1qw9a2 d1odza\_ d2vzsa5 d1bqca\_ d2x2ya1 d1hjqa\_ d1qnra\_ d4y7ea1  
d1vjza\_ d4k68a\_ d2v3ga\_ d4hpga\_ d1nofa2 d1nq6a\_ d1h4pa\_ d1aq0a\_  
d3ziza\_ d4bs0a\_ d1ecea\_ d1h1na\_ d1ta3b\_ d1w91a2 d1ilwa\_ d1uhva2  
d1us3a2 d1egza\_ d7a3ha\_ d1tvna1 d3nyda1 d1ghsa\_ d2cyga1 d4xv0a\_

d2c8na2 d1w32a\_ d3emca\_ d1v6ya1 d1foba\_ d2uwfa1 d2fgla\_ d3niya1  
d2c0ha1 d1rh9a1 d1yq2a5 d1szna2 d1fa2a\_ d1pama4 d5do8a1 d1lea9c3  
d1hx0a2 d2fhfa5 d1qhoa4 d1avaa2 d1m53a2 d4m8ua1 d2gjpa2 d1lwaha2  
d4howa1 d1ktba2 d1j0ha3 d3vm5a1 d2x1ia\_ d1wzaa2 d1uasa2 d2diea1  
d1mxga2 d1ht6a2 d1eswa\_ d1iv8a2 d5cpsa\_ d1ud2a2 d1zjaa1 d3gbea1  
d1kwga2 d1wdpa\_ d1gcya2 d1g5aa2 d1hvxa2 d3dhpaa2 d2bhua3 d4do4a1  
d3qgva1 d1e43a2 d1g94a2 d2d3na2 d1gjwa2 d1gvia3 d1x1na1 d1r7aa2  
d1tz7a1 d4c7ga2 d2gjxa1 d1jaka1 d1yhta1 d4toqa\_ d1wb0a1 d1w9pa1  
d1eoka\_ d1itxa1 d1kfwa1 d1edqa2 d2gsja\_ d1hjxa1 d1jnda1 d1vf8a1  
d1umqa\_ d1g2ha\_ d1mixa2 d1e5wa2 d1j19a2 d1isna2 d2a16b2 d1g4ma1  
d1g4ma2 d2y8ga\_ d1xkea1 d2y8fa\_ d1b9ra\_ d1offa\_ d1frra\_ d3wcqa\_  
d1e9ma\_ d1l5pa\_ d1wria\_ d1i7ha\_ d3av8a\_ d1czpa\_ d1rfka\_ d3plma1  
d3b2ga\_ d2bt6a2 d3nvva1 d1krha3 d2h88b1 d1n62a2 d1t3qa2 d1zoyb1  
d1jq4a\_ d1ffva2 d1dgja2 d1rm6c2 d9ldta1 d2ewda3 d1up7a1 d2dfda1  
d1s6ya1 d1vjta1 d7mdha1 d1hyea1 d1t2da1 d1ojsa3 d1b8pa1 d1ldna1  
d1hyha1 d1civa1 d2a92a1 d1ez4a1 d1i0za1 d1y6ja1 d1gv0a1 d1ur5a1  
d1llda1 d1obba1 d1v8ba1 d1gdha1 d2dlda1 d1mx3a1 d1ygya1 d1qp8a1  
d1li4a1 d1j4aa1 d2naca1 d1npya1 d3t4ea2 d1a4ia1 d1o0sa1 d2hk9a2  
d2egga2 d1b26a1 d1bvua1 d1gq2a1 d1clda1 d1leha1 d1gtma1 d1euza1  
d1nvtal d3dona2 d1edza1 d1gpja2 d1vi2a1 d1p77a1 d1b0aa1 d1vl6a1  
d1v9la1 d1txga2 d3f47a1 d1mv8a2 d2pv7a2 d1xc2a3 d2ahra2 d4xiya1  
d2f1ka2 d1pgja2 d1i36a2 d1np3a2 d1lj8a4 d1teaa3 d1qmgaa2 d2i76a2  
d2g5ca2 d1wdka3 d1dlja2 d3cuma3 d1kola2 d1f8fa2 d1qora2 d1jqba2  
d1vj0a2 d1cdoa2 d1gu7a2 d1dlta2 d1xa0a2 d2dm6a2 d1jvba2 d1rjwa2  
d1llua2 d1h2ba2 d1tt7a2 d1piwa2 d1o89a2 d1iz0a2 d1e3ja2 d1yb5a2  
d1uufa2 d1vj1a2 d1e3ia2 d3gpdg1 d2nvwal d1u8fo1 d1ydwal d1hdgo1  
d2g17a1 d1cf2o1 d2czca2 d1r0ka2 d1lobfo1 d2cvoa1 d1ebfa1 d1h6da1  
d1i32a1 d1zh8a1 d2q49a1 d1qkia1 d1j5pa4 d3pzra1 d1xeea1 d1vkoa1  
d1vm6a3 d3qvsa1 d2pkqo1 d1b7go1 d1gr0a1 d1p1ja1 d1lc0a1 d1j0xo1  
d3pwka1 d2hjsa1 d1zyao1 d1vkna1 d1t1ta1 d1nvmb1 d3sjua\_ d3ojfa1  
d1xu9a1 d2jjya1 d1n7ha\_ d1y1pa1 d1h5qa\_ d1jtva\_ d4fs3a\_ d2bkaa1  
d1gy8a\_ d2c5aa1 d1ulsa\_ d1ooea\_ d2b69a1 d1y5ma1 d1spxa\_ d1aela\_  
d1bxka\_ d1ydea1 d1gega\_ d1hdoa\_ d1o5ia\_ d1e6ua\_ d1snya1 d2rhca\_  
d3zv4a\_ d5ceja\_ d2d1ya1 d1fjha\_ d3w8ea\_ d2fmua1 d1x1ta\_ d1rpna\_  
d3ay7a1 d1k2wa\_ d1eq2a\_ d2hrba1 d3ruaa\_ d2ew8a1 d4hwka\_ d1xgka\_  
d2bd0a1 d1yo6a1 d2a35a1 d2ntva\_ d1vl8a\_ d1hdca\_ d4bkua\_ d2ag5a1  
d2q45a\_ d1nffa\_ d4iy1a\_ d1zbqa1 d1kewa\_ d1ek6a\_ d1ja9a\_ d2q46a2  
d1iy8a\_ d1cyda\_ d2ptga\_ d1hxha\_ d1uzma1 d3lyla\_ d4m89a\_ d3wyea\_  
d2blla1 d1w6ua\_ d1sb8a\_ d2q2va\_ d4nr0a\_ d1e6wa\_ d2gasa\_ d3oiga1  
d2bgka1 d1mxha\_ d1vl0a1 d1rkxa\_ d1r6da\_ d1wmaa1 d1e7wa\_ d2c07a1  
d1xkqa\_ d3tzha\_ d1g0oa\_ d3lz6a\_ d1qyca\_ d1ledoa\_ d1gz6a\_ d1loc2a\_  
d1t2aa\_ d1zema1 d2xoxa\_ d1z45a2 d1geea\_ d1p33a\_ d3lt0a\_ d4e6pa\_  
d2wyua\_ d1db3a\_ d4q9na\_ d1xhla\_ d4o1ma\_ d1fmca\_ d2uvda\_ d2gdza1  
d1uaya\_ d2z1ma\_ d2o23a2 d2fr1a2 d2fr1a1 d1qsga\_ d1qyda\_ d4zjua\_

d2a4ka1 d1yb1a\_ d1wvga1 d1yxma1 d3f4ba\_ d1mg5a\_ d1xg5a1 d1r55a1  
d3gboa\_ d1atla\_ d1kufa\_ d1buda\_ d4q1la\_ d1ypla\_ d1wnia\_ d2gfoa1  
d1vjva\_ d2ayna1 d3nhea\_ d4ekfa\_ d2ckga\_ d1th0a\_ d2bkra\_ d1xd3a\_  
d3ifwa\_ d1ex0a4 d1g0da4 d2f4ma1 d1x3za\_ d1mdwa\_ d1qxp4 d1ziva1  
d1zcma1 d3ioqa\_ d1fh0a\_ d1o0ea\_ d1m6da\_ d2cb5a\_ d1cs8a\_ g8pch.1  
d1s4va\_ d2pnsa\_ d1vsna1 d1mira\_ d1iwda\_ d2oula\_ d7pcka\_ d3bwka\_  
d3bcna\_ d2p86a\_ d1pvja\_ d1pcia\_ d1gece\_ d1deua\_ d4bs6a\_ d1xkga1  
d1cqda\_ d1jqpa2 d2c0ya\_ d2bdza\_ d3p5ua\_ d2o36a\_ d1k9xa\_ d1ex4a2  
d1c6va\_ d1zbf1a1 d2z1ha\_ d2etja1 d3qioa1 d1j11a\_ d2e41a\_ d2lsna1  
d1io2a\_ d1uaxa\_ d2yv0x\_ d1mu2a1 d1ekea\_ d1i39a\_ d1iv0a\_ d1nu0a\_  
d2d5ra1 d2v76a\_ d1wj1a1 d1aqca\_ d1qqga2 d1qqga1 d1ntva\_ d1n3ha\_  
d4dbba\_ d3f0wa1 d1p3ra\_ d1wgua1 d2cy4a1 d3hqca\_ d1wvha1 d1xr0b1  
d1r7ha\_ d1faaa\_ d1wika1 d1xfla\_ d1ttza1 d2f51a1 d1ti3a\_ d1nhoa\_  
d1sena\_ d2i4aa\_ d1ep7a\_ d1zmaa1 d1fo5a\_ d3lefa1 d3diea1 d2yana1  
d1z6na1 d1oaza\_ d3zywa1 d4aj8a\_ d1nm3a1 d4fiwa\_ d1wmja\_ d4hs1a1  
d1iloa\_ d1xwaa1 d1wjka1 d2vm1a\_ d1fb6a\_ d1gh2a\_ d1h75a\_ d1nw2a\_  
d1kx5b\_ d3a6na\_ d4m6ba2 d2nqbd\_ d3wkjd\_ d2yfwe\_ d4h9na\_ d5bnxa\_  
d1kx5c\_ d3r45a\_ d1eqzb\_ d4jjnb\_ d1f66c\_ d1eqza\_ d4wnnb\_ d1kx5a\_  
d1u35c1 d1id3a\_ d2nqbc\_ d1kx5d\_ d1f1ea\_ d1b67a\_ d2b5ea2 d2b5ea3  
d2b5ea1 d2b5ea4 d2kp1a1 d2kp2a1 d1hyua4 d1j08a1 d1j08a2 d1pd212  
d1nhya2 d2a2ra2 d1k0dd2 d1f2ea2 d1gsua2 d1f3ba2 d2fhea2 d2pvqa1  
d1tw9a2 d1oyja2 d1e6ba2 d1k0ma2 d3ik7a1 d4is0a1 d1r5aa2 d1jlva2  
d1m0ua2 d3gtub2 d1z9ha2 d1okta2 d1axda2 d2gsra2 d1tu7a2 d1k3ya2  
d1zgma1 d1b48a2 d1gnwa2 d1gwca2 d2gsta2 d1glqa2 d1oe8a2 d1pn9a2  
d1v2aa2 d1fw1a2 d1duga2 d2trcp\_ d1iqca2 d1iqca1 d1eb7a2 d1eb7a1  
d1nmla1 d1741a\_ d1691a\_ d2o4wa\_ d1p37a\_ d1k28a3 d1xjta1 d1jtma\_  
d2f2qa\_ d4e97a1 d2za0a\_ d2c21a1 d2pjsa1 d1k11a\_ d2i7ra1 d1ecsa\_  
d1xqaa1 d5cj3a1 d1jifa\_ d2p7oa\_ d1r9ca\_ d1nkia\_ d1mpya2 d1kw3b2  
d1kw3b1 d4ghga1 d1tfza1 d3isqa1 d3isqa2 d1sqia1 d1sqia2 d1lkda2  
d1lkda1 d1mpya1 d1cjxa2 d1cjxa1 d1sp9b2 d1t47a1 d1t47a2 d1flua2  
d1sp8a1 d1sp8a2 d1f1ua1 d1iyka2 d1rxta1 d1iica2 d1iica1 d1qsta\_  
d2beia1 d4m3sa\_ d1u6ma1 d1ygha\_ d1yk3a1 d3dr6a\_ d1xmta\_ d1z4ea1  
d2ge3a1 d1bo4a\_ d2fiaa1 d2jdca1 d1y9wa1 d3to7a\_ d1wwza1 d2f14a1  
d2ozua1 d2b5ga\_ d2cy2a1 d2p0wa\_ d1cm0a\_ d4pswa\_ d1yrea1 d1yr0a1  
d1m4ia\_ d2gana1 d1yvka1 d1ghea\_ d2g3aa1 d1y7ra1 d2eulia1 d1q2ya\_  
d2fsra1 d1xeba\_ d2ae6a1 d1cjwa\_ d1qsma\_ d2aj6a1 d1y9ka1 d1i12a\_  
d1vkca\_ d2atra1 d1n71a\_ d2d4pa1 d2fiwa1 d2fe7a1 d1tiqa1 d2ou2a\_  
d1yx0a1 d2fcka1 d1p0ha\_ d2j8ma\_ d2pq8a\_ d1z4ra1 d1s3za1 d1ufha\_  
d1xvqa1 d1pn0a2 d3hy2a\_ d2cvba1 d1o8xa\_ d1lu4a\_ d1we0a1 d2bmx1a1  
d2a4va1 d1psqa\_ d1xiya1 d1q98a\_ d1n8ja\_ d1zofa1 d2ggta\_ d3tjja\_  
d4jela1 d1o73a\_ d3s9fa\_ d2zcta\_ d1qmva\_ d1jfua\_ d2b1ka\_ d5dvba1  
d2b5xa1 d2v2ga\_ d3tb2a\_ d411ra\_ d4fh8a1 d1e2ya\_ d1knga\_ d2h30a\_  
d1i5ga\_ d2z9sa\_ d2f8aa1 d1tp9a1 d2b7ka\_ d1nm3a2 d3hvva\_ d2wfca1  
d4kcea\_ d1xvwa1 d4gqca1 d3qpma\_ d4k1fa\_ d1zsoa1 d1gp1a\_ d1prxa\_

d1e88a1 d116ja4 d1eaka4 d1eaka3 d116ja3 d1h8pa2 d1h8pa1 d1jgta2  
d1ofda3 d1ea0a3 d1ecfa2 d1q15a2 d1ct9a2 d1te5a\_ d1ra6a\_ d1muka\_  
d3gsza\_ d1khva\_ d1te9a\_ d2xwha\_ d3uqsa\_ d3hkwa\_ d3n6ma\_ d2cjqa\_  
d2xyma\_ d1teba\_ d1te8a\_ d1u09a1 d4wfxa\_ d3tyqa\_ d2pgga1 d2h1ia1  
d2r8ba1 d3b5ea1 d3cn9a\_ d1auoa\_ d1lgya\_ d4l3wa\_ d1gz7a\_ d1lukca\_  
d1j1ia\_ d2rhwa\_ d3groa\_ d1pjaa\_ d1thta\_ d2ftba\_ d1pmpa\_ d2rcqa1  
d1fdqa\_ d4lkpa\_ d1sa8a\_ d1vyfa\_ d1lpja\_ d3vg7a1 d4azqa1 d1o8va\_  
d5bvqa\_ d1p6pa\_ d2qo4a\_ d1opba\_ d1yiva1 d1o1va\_ d4bvma1 d4tkba\_  
d4i3ba\_ d1bwya\_ d1ftpa\_ d1ggla\_ d4gkca\_ d1cbia\_ d3p6da1 d1kqwa\_  
d2a0aa1 d3zxha\_ d1cgl\_a\_ d1rm8a\_ d1eaka2 d1hy7a\_ d2jsda\_ d1cxva\_  
d1hv5a\_ d1i76a\_ d1g12a\_ d3p0ya1 d1lgra1 d1lgra2 d1n8yc2 d1n8yc1  
d1m6ba2 d1m6ba1 d2bk7a\_ d3fjua\_ d1z5ra1 d1kwma1 d1uwya2 d1jqga1  
d2c1ca1 d1dtda\_ d1h8la2 d1h6ta2 d2tbvc\_ d1c8nc\_ d1x36a\_ d1smvc\_  
d1ng0c\_ d4sbvc\_ d1lopa\_ d1f2nc\_ d1cixa\_ d1y29a\_ d1v7fa\_ d2jtba\_  
d1d1ha\_ d1g9pa\_ d1lupa\_ d1qk7a\_ d1mb6a\_ d2a2va\_ d1niya\_ d1i25a\_  
d1hvwa\_ d2mpqa\_ d1ie6a\_ d1kqha\_ d1la4a\_ d2mxoa1 d1dl0a\_ d1koza\_  
d1qk6a\_ d1emxa\_ d1lqra\_ d1c6wa\_ d1rmka\_ d1ixta\_ d1eyoa\_ d1fu3a\_  
d1g1pa\_ d1f3ka\_ d1fyga\_ d1rypd\_ d1irua\_ d1rypc\_ d3unfk\_ d1rypa\_  
d1j2pa\_ d1irui\_ d1j2qh\_ d3unfh\_ d1m4ya\_ d1rypb\_ d1irul\_ d1irug\_  
d1iru2\_ d1q5rh\_ d1rypg\_ d1g3ka\_ d1iruf\_ d1q5qa\_ d1e94a\_ d1irub\_  
d1ryph\_ d3ty6a\_ d1iruj\_ d1iruk\_ d1rype\_ d1irud\_ d1irue\_ d3mi01\_  
d1rypf\_ d1iruh\_ d2z3ba\_ d1iruc\_ d3mka2\_ d1iru1\_ d1ny721 d1ny722  
d1a6ca3 d1a6ca2 d1pgl22 d1pgl21 d1pgl11 d1ny711 d1mqta\_ d1d4m3\_  
d1fmd3\_ d2mev1\_ g1aym.1 d1ev13\_ d4q4w1\_ d1r1a3\_ d2x5ia\_ d1rhi1\_  
g1r1a.1 g1d4m.1 g1rhi.1 d1b35b\_ d1loopa\_ d1tme1\_ d4iv1a\_ g1pvc.1  
g1fpn.1 d1fpn1\_ d4gb31\_ d1d4m1\_ d1fmd1\_ d1ev11\_ d2wzr3\_ g1cov.1  
d1qqp3\_ g1fmd.1 d2x5ic\_ d1rhi3\_ g1oop.1 d1hxs1\_ d1fpn3\_ d1bev1\_  
g2mev.1 d1eah3\_ d1aym1\_ d1pvc3\_ d1qqp1\_ d1zba3\_ d1h8ta\_ d3vbhc\_  
g1b35.1 g1bev.1 d1hxs3\_ g1ev1.1 d1bev3\_ g1tmf.1 d1tmf1\_ d1b35a\_  
d2mev3\_ g1eah.1 g1h8t.1 d1eah1\_ d4q4w3\_ d1r1a1\_ d1aym3\_ d1pvc1\_  
d1zba1\_ d1h8tc\_ d1loopc\_ d1tme3\_ g1qqp.1 d4iv1c\_ g1tme.1 d1y14b1  
d2nn6i1 d1i94l\_ d2zjra2 d1smxa\_ d2qamc2 d1hh2p1 d2r7da1 d1rl2a2  
d1wfga1 d3bzka4 d1x6oa2 d3a0ja\_ d2j01d2 d2ja9a1 d4q15a\_ d1hr0w\_  
d1luza\_ d2n3sa\_ d2vnud1 d1h95a\_ d1go3e1 d2nn6h1 d1ne3a\_ d2mo1a\_  
d1iz6a2 d1jjga\_ d1e3pa2 d2ix0a3 d2ix0a2 d2lxja\_ d1ueba3 d1ueba2  
d2z0sa1 d1u01a1 d2ix0a1 d2eifa2 d2je6i1 d3i2za1 d2c35b1 d2ahob2  
d1t9ha1 d3i4oa\_ d2qall1 d1jt8a\_ d2nn6g1 d1g6pa\_ d3cama\_ d1i94q\_  
d1c9oa\_ d1d7qa\_ d2ba0a1 d2vnud2 d2vnud3 d1khia2 d2qalq1 d1wi5a1  
d1xtda2 d1ny4a\_ d1eixa\_ d3exra\_ d2ffca1 d2fdsa1 d3n3ma1 d2czda\_  
d1q6oa\_ d2yyua\_ d1vqta1 d1dbta\_ d3ldva1 d4lt9a1 d3tc7a1 d3hoja\_  
d1i4na\_ d3vnda\_ d3n18a1 d1geqa\_ d3nava1 d1v5xa\_ d4a2ra1 d3tc6a1  
d1ujpa\_ d4ijba\_ d1xcfa\_ d1vc4a\_ d1rd5a\_ d1qopa\_ d3b5va\_ d2r80b\_  
d1cqxa1 d1cg5a\_ d3boma\_ d2h8fb\_ d2raoa\_ d3bj1a\_ d4hrrb\_ d2r50a\_  
d3d1kb\_ d2aa1b1 d3zhwa\_ d3hf4b\_ d3gdja\_ d1jebb\_ d3bj1b\_ d1x9fb\_



d1wmub\_ d1gcva\_ d3bcqb\_ d3d4xb\_ d1gvha1 d2dc3a\_ d3hf4a\_ d4yu3a\_  
d3k8ba\_ d1qpwb\_ d2r80a\_ d3bcqa\_ d1v4wa\_ d3wtgb\_ d1jl7a\_ d4esaa\_  
d1a9we\_ d3d1ab\_ d1fsla\_ d4h21a\_ d1v4wb\_ d1mwca\_ d1vhba\_ d1jeba\_  
d1spgb\_ d1h97a\_ d1q1fa\_ d1tu9a1 d3d1aa\_ d1hdsb\_ d3hyub\_ d2zfb\_ b\_  
d3fs4a\_ d1oj6a\_ d1shrb\_ d4h21b\_ d4yu3b\_ d1spga\_ d3hrwa\_ d3qqra\_  
d3at5a\_ d4wchd\_ d3hyua\_ d1cg5b\_ d1uc3a\_ d1hbra\_ d2raob\_ d1outb\_  
d4esab\_ d3gdjb\_ d3qqqa\_ d1x9fc\_ d3vrfa\_ d1litha\_ d3mkba\_ d3d4xa\_  
d3mjpa\_ d1jl6a\_ d3fh9a\_ d1outa\_ d2dc3b\_ d1it2a\_ d3eoka\_ d3g46a\_  
d1qpwa\_ d3vrfb\_ d1ch4a\_ d1x9fd\_ d1hdsa\_ d2zfba\_ d3mkbb\_ d1or4a\_  
d3wtga\_ d1a4fa\_ d3fh9b\_ d3bomb\_ d3cy5a\_ d3at5b\_ d1x9fa\_ d2oifa\_  
d4lmbx\_ d1cpcb\_ d3v57a\_ d1kn1a\_ d1cpc\_ a\_ d4f0ta\_ d2vjha\_ d4po5b\_  
d1eyxa\_ d1alla\_ d4f0tb\_ d1b33b\_ d1b8db\_ d4h0mb\_ d2vjhb\_ d4lm6b\_  
d2vmlb\_ d1allb\_ d2vjta\_ d3dbja\_ d2vmla\_ d2vjtb\_ d4f0ub\_ d1f99b\_  
d4rmpa1 d1lliaa\_ d1eyxb\_ d2uulb\_ d4lmsb\_ d4f0ua\_ d2bv8a\_ d1f99a\_  
d2bv8b\_ d2c71b\_ d3dbjb\_ d4rmpb1 d1b8da\_ d4h0ma\_ d3v57b\_ d1kn1b\_  
d1liab\_ d2uula\_ d2j96a\_ d3ia2a\_ d4dgqa1 d1hkha\_ d1zoia\_ d3nqyb\_  
d4gera\_ d1azwa\_ d1mtza\_ d2xqfa\_ d1ea5a\_ d1f6wa\_ d1dx4a\_ d1qe3a\_  
d1k4ya\_ d4qwwa\_ d2ha2a\_ d3c8da2 d2pbla1 d1jkma\_ d1jjia\_ d1lzla\_  
d2qvba\_ d2v9za\_ d4kafa1 d4iuaa3 d4bvva\_ d5hpga\_ d3k65a\_ d1ki0a3  
d1ki0a2 d1ki0a1 d1a0ha1 d1pmla\_ d3sp8a3 d2feba1 d1gvfa\_ d3qm3a1  
d2fjka\_ d1f74a\_ d3l21a\_ d2e1da\_ d1to3a1 d1w3ia\_ d1sfla\_ d1n7ka\_  
d1vcva1 d4imea\_ d1wa3a\_ d2ocza1 d3m16a\_ d2yxga\_ d1ub3a\_ d3a5fa\_  
d1fbaa\_ d1l6wa\_ d1xfba1 d1wx0a1 d1vpxa1 d1ojxa\_ d1mxsa\_ d2a4aa1  
d1xkya1 d3cq0a1 d3s1xa\_ d1f05a\_ d1fdja\_ d3cpra1 d4d2ja\_ d1cg2a1  
d1yloa2 d1y7ea2 d1y0ya3 d1lfwa1 d1vixa1 d1fnoa4 d1vhoa2 d1ysja1  
d1vhea2 d1z21a1 d2fvga2 d1vgya1 d1r3na1 d2grea2 d1xmba1 g1q71.1  
d3rp2a\_ g1lucy.1 d1fuja\_ d2zchp\_ d3w94a\_ d1si5h\_ d1llo6a\_ g2pka.1  
d1cgha\_ d1kigh\_ d1a5ia\_ d3s9ba\_ d1hj8a\_ d1ao5a\_ d2anya\_ d1q3xa1  
d1gvza\_ d1azza\_ d4gsoa\_ d2f91a1 d1iaua\_ d1gdna\_ d1eufa\_ g1fiw.1  
d1eq9a\_ d4nfea\_ d2rdla\_ d1spja\_ d1elva1 d1a7sa\_ d1ekbb\_ d1pfxc\_  
d1yc0a\_ d2aiqa\_ g1fiz.1 d1fi8a\_ d4k60a\_ d4dgja\_ d1mzaa\_ d1op0a\_  
d3tjva\_ d1pytd\_ d1sgfg\_ g1gg6.1 d2eeka\_ d1a0ja\_ d3g01a\_ d1pytc\_  
d4e7na\_ d1ddja\_ d1z8ga1 d2hlca\_ d1npga\_ d1brup\_ g1jou.1 d1sgfa\_  
d1autc\_ g2hnt.1 g1kdq.1 d1orfa\_ d3s69a\_ d4crga\_ d1fxya\_ d1bqya\_  
d1svpa\_ d1mbma\_ d3su6a1 d4agka\_ d1vcpa\_ d1q31a\_ g1n11.1 d3e90b\_  
d1ep5a\_ d3u1jb\_ d1dzka\_ d4tlja\_ d2a2ua\_ d4wfva\_ d3t1da\_ d4iixa\_  
d3zq3a\_ d2nnda\_ d1i4ua\_ d1kxo\_ a\_ d1bbpa\_ d1kt7a\_ d1lexsa\_ d3s26a1  
d1lf7a\_ d1qfta\_ d4gh7a\_ d1z24a1 d1qabe\_ d1xkia\_ d1lew3a\_ d3bx7a\_  
d4iawa1 d1n0sa\_ d3kzaa\_ d2k23a\_ d2l9ca1 d2joza1 d1gm6a\_ d3kffa\_  
d3saoa1 d1e5pa\_ d1yupa1 d1iiua\_ d1e69a\_ d1mv5a\_ d3g60a4 g1ii8.1  
d1ewqa2 d1ji0a\_ d1qhla\_ d1v43a3 d2wmfa1 d1vpla\_ d1g2912 d4a82a2  
g1f2t.1 d2d62a1 d3tuic1 d2bbsa1 d3g60a3 d2ixea\_ d1g6ha\_ d1sgwa1  
d2qi9c\_ d3r1fa1 d3b60a1 d3d31a2 d2pzea1 g1xew.1 d1jj7a\_ d1oxk2  
d2onka1 d1wlwa\_ d1iwea\_ d1qf5a\_ d1vmaa2 d1nija1 d1np6a\_ d2p67a1

d3ihla\_ d1okkd2 d1ls1a2 d1s1ma2 dliona\_ d2v40a\_ d3hida\_ d2vola1  
d2g0ta1 d1vcoa2 d1j8mf2 d1g3qa\_ d1xjca\_ d1p9ba\_ d1qzxa3 d1ihua2  
d1ihua1 d2qm8a\_ d1dj2a\_ d4ioja\_ d1cp2a\_ d1yrba2 d1hyqa\_ d3gqba2  
d1skye3 d1xp8a1 d1tf7a2 d1tf7a1 d1ye8a1 d1skyb3 d2qe7d2 d4blta\_  
d4huta\_ d3ldaa2 d4hyya\_ d2i3ba1 d3j9tb2 d3ntua2 d1vdza1 d2z43a\_  
d1e9ra\_ d1nlfa\_ d3ziaa2 d1n0wa\_ d1g6oa\_ d3ziad2 d3j9ta2 d1pzna2  
d3gqbb2 d2i49a\_ d1nnfa\_ d1xvxa\_ d1ursa\_ d1h3da1 d1iuda\_ d4m1va1  
d1twya\_ d3e13x\_ d2nxoa1 d4pfua\_ d3ttma\_ d1elja\_ d2qmwa1 d1us5a\_  
d1y3na1 d1jeta\_ d1uqwa\_ d4f19a1 d2esna2 d3thia\_ d3fasa1 d2uyeb\_  
d2xwva1 d1r9la\_ d2fyia1 d1pb7a\_ d2ozza1 d1sw5a\_ d1nh8a1 d1vr5a1  
d2g29a\_ d1xs5a\_ d3lswa\_ d2z23a\_ d3w9va\_ d3tcha\_ d1q35a\_ d1z7me1  
d3q27a\_ d1p99a\_ d1ve4a1 d2i6ea1 d4mcoa1 d4n8ya\_ d1eu8a\_ d1zbma1  
d1hsla\_ d1ixca2 d1j1na\_ d1xvya\_ d1y9ua\_ d2z22a1 d1xoca1 d4oera\_  
d1wdna\_ d5f1qa1 d1xt8a1 d1i6aa\_ d4gwoa\_ d4igta1 d1pc3a\_ d4mmpa1  
d1o63a\_ d2czla1 d2onsa2 d4mija1 d4ok5a1 d2bmfa1 d2bmfa2 d1yksa1  
d1yksa2 d1jr6a\_ d2qeqa1 d2jlqa1 d1a1va2 d1eh3a\_ d3skpa\_ d1dtza1  
d1dtza2 d1ieja\_ d1jnfa2 d1ce2a1 d1jnfa1 d1b1xa2 d1b1xa1 d1jw1a1  
d1jw1a2 d1ryoa\_ d1h76a1 d1h76a2 d1c4oa1 d2p6ra3 d2p6ra4 d1oywa2  
d1oywa3 d1wrba1 d1w36b2 d1w36b1 d1c4oa2 d3bora\_ d1t6na\_ d2eyqa5  
d2eyqa3 d2eyqa2 d2zu6a2 d1veca\_ d1uaaa1 d1w36d1 d2g9na1 d1z3ix2  
d2rb4a\_ d1hv8a1 d1hv8a2 d1t5ia\_ d1w36c2 d2j0sa2 d2j0sa1 d1fuka\_  
d3hjha1 d1z5za1 d1qdea\_ d1z63a1 d1s2ma2 d1s2ma1 d1wp9a1 d1wp9a2  
d1gm5a4 d3dina4 d3dina3 d1q0ua\_ d1w36c1 d1z3ix1 d1nkta3 d1nkta4  
d1uaaa2 d1w36d2 g1qhh.1 d2fwra2 d2fwra1 d3q3ma\_ d1za0a1 d1mxra\_  
d2inca\_ d1jk0a\_ d2incb\_ d1mhyb\_ d3hf1b\_ d1mtyb\_ d1r2fa\_ d2uw1a\_  
d3n37a\_ d1afra\_ d1oquc\_ d1syys\_ d1mtyd\_ d2olza\_ d1uzra\_ d1smsa\_  
d2fkza\_ d1zujal d1s3qa1 d2fjca1 d1z6om1 d1veia\_ d4dyya\_ d1jiga\_  
d3gvya\_ d2pyba\_ d4cy9a1 d3bvfa1 d1r03a\_ d2cf7a\_ d1nf4a\_ d1zs3a1  
d4iwka\_ d3ka8a\_ d3np0x\_ d1n1qa\_ d1lb3a\_ d4e6ka\_ d1z6oa1 d2fzfa1  
d4dyua\_ d3ge4a\_ d1jgca\_ d4am4a\_ d2z6ma\_ d1ji5a\_ d1vlga\_ d1lkoa1  
d1krqa\_ d3qz3a\_ d1o9ra\_ d2ffxj\_ d1euma\_ d1yv1a1 d2v2pa\_ d1j30a\_  
d4di0a\_ d1dpsa\_ d1oewa\_ d2qzxa\_ d2asia\_ d1psoe\_ d1miqa\_ d1smra\_  
d2h6ta\_ d1pfza\_ d1lizda\_ d3hd8a\_ d1j71a\_ d1dpja\_ d4aa9a\_ d1t6ex\_  
g1b5f.1 g1lya.1 g1htr.1 d1qdma2 d1bxoa\_ d1wkra\_ d1tzsa\_ d1libqa\_  
d2qzwa\_ d1h4ra3 d4yl8a1 d2a16a3 d1l7ya\_ d1wgda1 d1wgga1 d4q5eb\_  
d1wjna1 d1se9a\_ d3n3kb\_ d1wz0a1 d1we6a1 d2m0xa\_ d2gbka\_ d3rt3b1  
d1wh3a1 d1sifa\_ d2ekek2 d4ii2b1 d4hk2a1 d1c3ta\_ d1m94a\_ d1wgha1  
d1ttna1 d1j8ca\_ d1wx8a1 d3v6cb1 d2ma9b\_ d4i6lb1 d1bt0a\_ d2jvca1  
d1iyfa\_ d2k1fa\_ d1wxva1 d1wf9a1 d1t0ya\_ d2io0b2 d1x1ma1 d2gbma\_  
d1zw7a1 d2m17a\_ d1we7a1 d2lwpa\_ d2gbja\_ d1wjua1 d1v6ea1 d1v86a1  
d4eewa\_ d1w1aa1 d4icva\_ d4gu2a\_ d1wx7a1 d1wy8a1 d4hjka1 d2faza1  
d1v5oa1 d3ruib\_ d1eo6a\_ d3waob\_ d2r2qa1 d3m95a\_ d3wana\_ d2a13a1  
d2cr5a1 d1wj4a1 d1s3sg\_ d3ubra\_ d1qo8a1 d1d4ca1 d2k3va\_ d1qdba\_  
d1m1qa\_ d2j7aa\_ d1h21a\_ d1ogyb\_ d4fasa\_ d1jnia\_ d1oaha\_ d1sp3a\_

d1um8a\_ dlixza\_ d1qvra2 d1qvra3 d1qzma\_ d1sxjc2 d1jr3d2 d2p65a\_  
d1l8qa2 d1g8pa\_ d3hu3a3 d1sxjd2 d1njfa\_ d1in4a2 d1sxja2 d1tuea1  
d2ce7a2 d1w5sa2 d1sxjb2 d1d2na\_ d1ny5a2 d2gnoa2 d2a5yb3 d1fnna2  
d1u0ja1 d1lv7a\_ d1iqpa2 d2fnaa2 d1ixsb2 d4gita\_ d1sxje2 d1g41a\_  
d2e3fa\_ d1mm0a\_ d2e3ea\_ d2l1da\_ d2ny8x\_ d2e3ga\_ d2ny9x\_ d2nz3a\_  
d21j7a\_ d1n4na\_ d2m8bb1 d2kyqa\_ d3psma\_ d1jkza\_ d1jxca\_ d2g11a\_  
d4uj0a\_ d2k4ua\_ d1hp2a\_ d2lu9a\_ d1baha\_ d2meoa1 d1wm7a\_ d1hlya\_  
d1n8ma\_ d1jlza\_ d1wpda\_ d1c55a\_ d1pvza\_ d1wt7a\_ d1rjia\_ d1wz5a\_  
d1m2sa\_ d1pjva\_ d1c49a\_ d1qkya\_ d2ktca1 d1wmta\_ d1du9a\_ d1j5ja\_  
d1r1ga\_ d1t0za\_ d2i61a\_ d1t1ta\_ d1sn4a\_ d1kv0a\_ d2lkba\_ d1npia\_  
d1wwna\_ d1pe4a\_ d2kbka\_ d2li7a\_ d1djta\_ d2kbha\_ d1dq7a\_ d1sega\_  
d1omya\_ d1zywa1 d1jzaa\_ d1n9wa1 d1bbua1 d1elo1a1 d1c0aa1 d1b8aa1  
d1l0wa1 d3a74a1 d1iyjb4 d1iyjb5 d1iyjb3 d1o7ia\_ d4ipca1 d1x3ea\_  
d4apva\_ d1jb7a1 d1jb7a2 d1jb7a3 d3kdfa\_ d1ue1b\_ d1wjja1 d3eiva\_  
d1xjva2 d1xjva1 d2ccza2 d1se8a\_ d1l1oc\_ d1jb7b\_ d1qvca\_ d3ulla\_  
d1qzga\_ d1miua5 d1miua3 d3g48a1 d1gd7a\_ d1mkha\_ d1jjcb3 d1pyba\_  
d3ubub\_ d1egia\_ d1qo3c\_ d1v7pa\_ d1tdqb\_ d3ubua\_ d1c3ab\_ d1h8ua\_  
d3bx4b\_ d1t8ca1 d1sb2a1 d1qdda\_ d2ziba1 d3cada\_ d1byfa\_ d1j34b\_  
d1jwia\_ d1jzna\_ d1c3aa\_ d1wmza\_ d3bdwb\_ d1hq8a\_ d1fifa1 d1dv8a\_  
d3hupa\_ d1wk1a1 d1umra\_ d2afpa\_ d3bx4a\_ d1gz2a\_ d1sl6a\_ d1v7pb\_  
d3g8ka\_ d1lixa\_ d1j34a\_ d1jwib\_ d1g1sa1 d1y17a1 d1ja3a\_ d1fvub\_  
d3bdwa\_ d1sb2b1 d1fvua\_ d1umrc\_ d1oz7a\_ d4m17a\_ d3cfwa1 d1ypqa1  
d1g1ta1 d3fd4a\_ d3l9jc\_ d4dn8a1 d1v41b\_ d1rdl1\_ d2msba\_ d1dgsa2  
d1fvia1 d1ckma1 d1x9na2 d1rpma\_ d2shpa1 d1yfoa\_ d1l8ka\_ d2ooqa1  
d1g4us2 d1p15a\_ d1lara2 d1lara1 d1wcha\_ d2fh7a2 d2fh7a1 d1ohea2  
d2f4da\_ d1rxda\_ d2hxpa\_ d1xria\_ d1d5ra2 d1fpza\_ d3ezza\_ d4y2ea\_  
d1i9sa\_ d1c1la\_ d41bqa\_ d1slta\_ d4no4a\_ d3zsja\_ d3duia\_ d1g86a\_  
d1is3a\_ d1qmja\_ d1hlca\_ d1tdha3 d1q3ba3 d1ee8a3 d1k82a3 g1qmo.1  
g1len.1 d3zyra\_ d1n47a\_ g2ltn.1 d1avba\_ d3usua\_ d1dhkb\_ d1f9ka\_  
d1ukga\_ d1g8wa\_ d1g9fa\_ d1wbfa\_ d3wcsa\_ d1g7ya\_ g1loe.1 d1mvqa\_  
d1hq1a\_ d1v6ia\_ d1dbna\_ d1qnwa\_ d1fx5a\_ d4l8qa\_ d1ioaa\_ d3n35a\_  
d1epwa1 d3h33a\_ d1rwja\_ d19hca\_ d1os6a\_ d3bxua\_ d3h4na\_ d1i77a\_  
d3caoa\_ d1j0pa\_ d2ctha\_ d1duwa\_ d1ofwa\_ d2e84a\_ d1hh5a\_ d3h34a\_  
d1dszb\_ d1a6ya\_ d3cbba\_ d1ynwa1 d1r4ia\_ d1hcqa\_ d2hana\_ d2hanb\_  
d2enva1 d1kb4b\_ d2n11b\_ d1l01a\_ d1cita\_ d2dara2 d2dara1 d1wyha2  
d2dloa2 d1rutx4 d1rutx3 d2cuqa2 d1x41a2 d1x41a1 d1x3ha2 d1x3ha1  
d2d8za1 d1x61a2 d1x6aa1 d1x6aa2 d2cora2 d2cora1 d1v6ga1 d1v6ga2  
d2d8za2 d1x64a1 d1x64a2 d1b8ta1 d2co8a1 d1x63a2 d2dj7a2 d2dj7a1  
d2cu8a2 d2cu8a1 d1g47a2 d1g47a1 d1j2oa1 d1wyha1 d2dloa1 d1wiga1  
d1wiga2 d2cupa2 d2cupa3 d1x68a1 d2d8ya2 d2d8ya1 d1m3va2 d1x62a1  
d1x68a2 d1x61a1 d1b8ta3 d1b8ta2 d2d8xa2 d2d8xa1 d1x4ka1 d1x4ka2  
d2cuqa1 d1m3va1 d2co8a2 d1j2oa2 d1x63a1 d2cura1 d2cura2 d1x62a2  
d1op9a\_ d1y01a1 d1letzb1 d1egj11 d2gsib1 d1nj9a1 d4jfhd1 d1aqk11  
d1t2ja\_ d1l04h1 d1zvya1 d3v4v11 d4enec1 d1kxtb\_ d5e8ea1 d2pxya\_

d4weud\_ dlxiwc\_ d2esvd1 dlqznh\_ dlogae1 dlF4xh1 d4nlhb\_ d3ezjb1  
d3mlwl1 dlkfah1 d1etza1 dlB4jh1 d3cfic\_ d4w68a\_ d2arja1 d1ek3a\_  
d2ok011 dlvera\_ dluwgh1 dlblnb1 dlfpth1 dlrzga1 d2giya1 d4m3kb1  
d1nc2a1 d2nyyd1 dlncna\_ dlfbih1 d5dxwa\_ d4fqqa1 dlDqdh1 dljfq11  
d1kelh1 dlfaih1 dlfrgl1 dlfigl1 d4m6nl1 dlfo0a\_ d4hxb11 d3b5ga\_  
d3quyd1 d2h9gb1 dlI8kb\_ d2dd8h1 d2ck0h1 d1eaja\_ d4w6wb1 d2a6ib3  
d1t66d1 d2e27h\_ dl0blb1 dlfl1b1 d2v7na1 dlad0a1 d2xt1b1 dlpskh1  
d4i13b1 d2op4l1 d1a0ql1 dlUwe11 dlza3a1 d1ncbl1 d4uu9a\_ dlBm3h1  
d1cloh1 dlNqba2 dlcf8h1 d4y5va\_ dlmhph1 d5anma1 d4cdgc1 d4ldeb\_  
dlY01b1 d2pcpb1 dlz3gl1 dldfb11 dlfh5h1 d3g5xa1 dlTzib1 d4dn3l1  
d3zhka1 d2b1hh1 d2uyla1 dlF3dh1 dlNj9b1 d2agjh1 d2h1pl1 dlq72h1  
d8fabbl dlndmb1 dlrjca1 d4u6hb1 d3upca\_ d2fbj11 dlosph1 dlTvda\_  
d2cjh\_ d4fhbd1 dlbd2d1 dlrz7h1 d3nn8a\_ dlblna1 dlknoa1 dlNfda1  
d2bmkb1 dlDql1\_ dlIgyb1 dlIgf11 dl2e8h1 d3utza1 dlnc2b1 dlrihh1  
d4mwfb1 d4jvpa1 dlmieh1 dlrhfa1 dlfgn11 dlSbsh1 dl1p9e1 dlDn0a1  
d4lqfl1 dlIaih1 dlkgcd1 dlmh5b1 dlgp011 d2g60h3 dlF8t11 d2jixd1  
d4grwh\_ dlfo0b\_ dlbfob1 dlaxsa1 dlU9ka\_ dlNmbh\_ dlh8na1 dlh8na2  
dljguh1 d4eura1 d3sdy11 d35c8h1 dlw72l1 dlmvub\_ dlI9rh1 dl0bl1a1  
d4wenb\_ dlYeeh1 d3ietc1 dlF58h1 dlad0b1 dlmqkl\_ dlnbvh1 d4b50a\_  
d3r8bb\_ dlbafl1 dlmamh1 d4rgne1 d2gsgb\_ d35c8l1 dlbafh1 dlailh1  
d2pcpa1 d2fath1 d2x1pa\_ dlorsb1 dlIbg11 dlshma\_ dl1a2yb\_ dlU0qa\_  
d2coqa\_ dlhilb1 dlqfwi\_ dljv5b\_ dlfn4b1 d5e0qa\_ dlNsnh1 dlplgl1  
d4ocx11 dlkb5h1 dlrzfh1 dlpg7x1 d2fx7h1 d2oi9c\_ dl17il1 d3eyva1  
dlD5il1 d4ffyl\_ dlTet11 dl1a6wh\_ dl1ac6a\_ d3dvfa\_ dlNfde1 dlmimh1  
dlri8a1 dljhlh\_ d3dura\_ dlfskb1 dlF97a1 d3so3b1 d2ak4d1 dl1p9f1  
d4z7wf1 dl17th1 d4y5ya\_ d4x7ec1 dlEmth1 dlIkfl1 dlNlbh1 d4utal1  
dlbjma1 d1eapb1 dlU6ah1 d2dtgd1 dlkj2b\_ dlXeda1 dlcl1eh1 dlfgvh\_  
d2bnub1 d2fb4h1 d2dtgb1 dlktrh\_ dljpth1 dlqkz11 d4hepg\_ d2atpb1  
dlflrh1 d2hrpl1 dlmvfa\_ dlIaim1 d3k80a1 d2jb5h1 d3zkxc\_ d4grwe\_  
dlit9h1 dlrhhb1 d3w9ec\_ dl1e4wh1 dlSy6h1 d2j6eh1 d3qxta\_ dljglh1  
dlp7ka1 dlTzhb1 d4n8pa1 dlgafl1 d2jelh1 dlwioa2 d4i0cc1 dlCicb1  
dl1mka2 dl1mka1 dlIqwh1 dlOrqb1 dl1ejoh1 dljnlh1 d4zg1a\_ d43c9b\_  
dlggb11 dlwejh1 d3q6fa1 dlF3dj1 d3c6la1 dlBqlh1 d3p9wb\_ dl1a3r11  
dlh0db1 d2uzil\_ dl1e08l1 dlqfwl\_ dlN7ml1 dlIgj11 dlC5ch1 d2a9mh\_  
dlrmfh1 dlFj1b1 d4heme\_ dlccza1 dl1a5fh1 dl0gad1 dlDl1fh\_ dlqa9b\_  
dlvge11 d3qskb\_ dlSjxa\_ d4ozfg1 dlSq2n\_ dlqd0a\_ dlKcvh1 dlC5db1  
d3qcull d3bn9d1 dlmjuh1 d4y8dc\_ d7fabh1 d3dvgb1 dl1l0l1 dl1a6tb1  
dlgigh1 dlkcrh1 d2hwz11 dlYjdc1 d3clfl1 d4krna\_ dlDl7l\_ dl1e6ol1  
dlmexh1 d3r0ma\_ d4kkna\_ dlfnsl1 dl0aqh\_ dlrzia1 dlucbh1 dlncwl1  
d4b41a\_ dlNdf1 d2mpah1 d2d7t11 d4grwf\_ d4b5ea\_ dl1k3h1 d3u79a\_  
d4u3xa\_ dlghfl1 dlBvkb\_ dlmcww1 dlB88a\_ dljrhh1 d32c2b1 d4wemb\_  
dlDsfh\_ dlOp3h1 dlce1l1 dlIqda1 dlqoka1 dlqoka2 dlqfuh1 d2cya1  
dlay1h1 dl0aq1\_ d3ab0b\_ dlrur11 dlT4kb1 dlBz7b1 dlN0xh1 dlfor11  
dlucbl1 d4w6yb\_ d43c9a\_ d2aab11 dlTzia1 d4nlca\_ dlk6qh1 d3g9ab\_

d4tvsa1 d1lgrmh\_ d1pz5b1 d3dx9a1 d3wxwh\_ d1nakhl d1kcul1 d3eaka\_  
d4qlra1 d1cr9l1 d1d9ka\_ d1f4xl1 d1deea1 d2i27n2 d1c12a1 d2orb11  
d1j8hd1 d1mcph1 d1c5da1 d1kenh1 d1bd2e1 d1h5ba\_ d4x7fc1 d3upaa\_  
d1t3fa1 d1indh1 d2dtgc1 d4hc111 d1zv5a1 d4wgvb\_ d1uwgl1 d4f37k1  
d1aqkh1 d1vesa\_ d3zkqd\_ d1fpt11 d1lo4l1 d1knob1 d3rrqa\_ d1ct8b1  
d4orz\_ d1mlbb1 d4hgkc1 d1dqdl1 d1bogb1 d4ozhe1 d1dr9a1 d1i7za1  
d1dn0b1 d1kell1 d1rzib1 d1ypzf1 d1wtla\_ d1hkfa\_ d1fail1 d1figh1  
d2vyre\_ d1sjva\_ d1ohqa\_ d1bfoa1 d1pkqb1 d1mjul1 d1b4jl1 d1nsl11  
d2arjb1 d1p4bh\_ d4aj0a\_ d3nn8b\_ d2rcja1 d1f2xk\_ d4v1dd\_ d1adqh1  
d2eksa\_ d4k3ga\_ d1jfqh1 d1uweh1 d1frgh1 d4gftb\_ d1uz8b1 d4nlea\_  
d1bm3l1 d1clol1 d3mcka1 d2vq1a1 d1ae6h1 d4aq1b1 d1uj3b1 d1nbqa1  
d1fh5l1 d2ck0l1 d2ywza\_ d1q72l1 d4nxbx\_ d1hila1 d4hz1b1 d2j88l1  
d1zmya1 d1cd0a\_ d1a4ka1 d1pskl1 d1a0qh1 d4krmb\_ d1ncbh1 d2fbjh1  
d1j8he1 d1i3ua\_ d1cf8l1 d1fe8h1 d2p1ya1 d1eeqa\_ d2x89a\_ d1o10a\_  
d2r0lh1 d1ub5a1 d1dfbh1 d3eyvb1 d4jdvb1 d4p2cg\_ d2gsia1 d2agj11  
d1u3ha1 d2h1ph1 d1rihl1 d1fskc1 d1boga1 d2a77l1 d1ospl1 d1qfoa\_  
d3dwt\_ d2fx7l1 d1rz7l1 d3stba1 d1pkqa1 d1b6da1 d1dzba2 d1dzba1  
d1kj2a\_ d4l1ha\_ d1rzgb1 d1dq1h\_ d12e8l1 d1miel1 d1jmaa\_ d1sbs11  
d1fgnh1 d1f58l1 d1mqkh\_ d1ndgb1 d3qeg11 d1iail1 d2aw2a1 d1tqbc1  
d3fo2a1 d4dkaa\_ d1f8th1 d2g60l1 d2ywy\_ d1uj3a1 d1yc7a\_ d3bd3a\_  
d4w6xb1 d1nmb1\_ d1i8ka\_ d1rjlb1 d1ypze1 d1p7kb1 d1kxqe\_ d1gpoh1  
d2z4qa1 d1w72h1 d1i9rl1 d4qgya1 d4xt1c\_ d2qqnh1 d1cical d3c08h1  
d2cd0a\_ d2bdnh1 d1hnga1 d1maml1 d1nldh1 d1cr9h1 d4lcih1 d3bkyh1  
d3qg7l1 d1ai1l1 d1kxvc\_ d4iosd\_ d1l7ih1 d2x1qa\_ d1ub6b1 d3k74b\_  
d1ibgh1 d1teth1 d1igya1 d1hxma1 d2x6ma\_ d2e7la\_ d5e03a\_ d1qfwm\_  
d2r0kh1 d1igjb1 d1rurh1 d1plgh1 d1mj8h1 d1yuhb1 d3fmg11 d1rzfl1  
d1emt11 d1ad9b1 d1igtb1 d1nlbl1 d1d5ih1 d3k7ua\_ d4ffyh\_ d1bwwa\_  
d3dvga1 d1a6ta1 d1fgvl\_ d4qxgl1 d1mim11 d1jhl1\_ d2hffb1 d2hh0l1  
d1qkzh1 d1l7tl1 d1afvh1 d1iaii1 d2cjuh\_ d1um5h1 d2ghwb2 d2ghwb1  
d1kgce1 d2fgwh1 d1ikfh1 d1dvfd\_ d2i24n1 d2xtjb\_ d1za3b1 d2yc1a\_  
d2hh0h1 d2x1oa\_ d1bvka\_ d1rjla1 d5e7ba1 d1igta1 d1il1b1 d2fb4l1  
d1mvua\_ d1jpt11 d32c2a1 d1fvca\_ d1iqdb1 d2hrph1 d2p4ab\_ d4qo1a\_  
d1p2cb1 d1wt5c\_ d1t4ka1 d5c1mb\_ d1it9l1 d1bz7a1 d1b2wh1 d1e4wl1  
d1jnl11 d1yedb1 d1za6b1 d3u7aa\_ d1igfh1 d3gnml1 d1orsa1 d1wejl1  
d1a2ya\_ d1hxmb1 d1gafh1 d2j4wh1 d1pz5a1 d1j05a\_ d1a3rh1 d4fq1l1  
d1qfwh\_ d1eo8h1 d1n7mh1 d4s11a\_ d1kegh1 d5da4a\_ d1iqwl1 d3whxb1  
d1vgeh1 d1deeb1 d1c12b1 d1t2ql1 d1ad9a1 d3gsnb1 d3b2uc1 d1ggbh1  
d1t3fb1 d1nakl1 d4ocmc\_ d1lila1 d2v7hb3 d2esve1 d1mcoh1 d2qr0b1  
d2q3aa\_ d1ct8a1 d1kcr11 d2pxyb\_ d2uzih\_ d5c3ld\_ d3durb\_ d1c5cl1  
d2ak4e1 d1dl7h\_ d1xiwd\_ d1mlba1 d1rmfl1 d1i7zb1 d1dlfl\_ d2xa3a\_  
d5bq7b1 d1dqqb1 d3h42l1 d1egjh1 d1kcv11 d1fe8l1 d2j6e11 d1f3rb2  
d1lk3l1 d1sm3h1 d1q0xh1 d1ghfh1 d7fab11 d1igch1 d1lo0h1 d4idla\_  
d5c2bl\_ d1jrh11 d1il1a1 d3zhda1 d4kfcz\_ d1b0wa\_ d1e6oh1 d1mex11  
d4krpb\_ d1fnsh1 d1ncwh1 d4hgma\_ d4eigb1 d4rzca\_ d2mpal1 d4y5xa\_

d5en2b1 d3lrga1 d4ej1c1 d1rhha1 d1j05b\_ d1forh1 d1q9wb1 d2wzpd\_  
d2aq2a1 d1h0da1 d3revb1 d2ij0c1 d1tzha1 d4m7j11 d1k6ql1 d3b9kc1  
d1igml\_ d3qeua1 d1dsfl\_ d1ce1h1 d1kcu1 d1zvha1 d1zvoa1 d1tqbb1  
d1ay111 d2qsc11 d2cgrh1 d1n10h1 d1ken11 d3eo0a1 d4n9ob1 d1n0x11  
d3k1kc\_ d2aq2b1 d1ck1a1 d1enfa1 d1i4pa1 d1v1oa1 d1et9a1 d1esfa1  
d2g9hd1 d4ohja1 d1klud1 d1bxta1 d1eu3a1 d1ty0a1 d1fnua1 d2cqva1  
d1fhga\_ d2k1ma\_ d2d12a1 d1biha3 d1biha1 d1biha4 d3qp3a1 d1glca\_  
d1gxea\_ d1cvsc2 d1cvsc1 d1xmwa2 d1m4ka2 d2otpa2 d1biha2 d1rhfa2  
d2fcba2 d2fcba1 d1wwbx\_ d1gsma2 d1epfa1 d1epfa2 d2dava1 d1waaa\_  
d1f97a2 d1x44a1 d1vcaa2 d1fn1a2 d1fn1a1 d3b5ha2 d3h8na2 d3h8na1  
d1bjbja1 d1bjbja2 d1pd6a\_ d1f2qa2 d1f2qa1 d3cx2a\_ d1nbqa2 d3b5ha1  
d1n26a1 d1xiwb\_ d1xaua\_ d1fltx\_ d2ifga1 d1olla1 d1olla2 d1cs6a4  
d1cs6a3 d1cs6a2 d1cs6a1 d2gw5a2 d1sy6a1 d1xiwa\_ d1lucta2 d1lucta1  
d1ry7b2 d1gl14b\_ d1qz1a3 d1olza1 d2c9aa1 d1wwca\_

**Family-59 (c.3.1.5)**

**Positive dataset contains 10 protein sequences.**

d2jk6a2 d2jk6a1 d1xhca1 d1xhca2 d1w4xa1 d1w4xa2 d1xdia1 d2gv8a2  
d2gv8a1 d3dk9a1

**Negative dataset contains 4041 protein sequences.**

d1m32a\_ d1libja\_ d1c7na\_ d1iuga\_ d4q75a\_ d2bkwa1 d1t3ia\_ d1n8pa\_  
d1qz9a\_ d1jff9a\_ d1eg5a\_ d3kgwa\_ d1cl1a\_ d2ctza1 d1vjoa\_ d2rfva\_  
d1gc0a\_ d1cs1a\_ d1d2fa\_ d2ch1a1 d1qgna\_ d1pffa\_ d1elua\_ d1sefa\_  
d1sfna\_ d1sq4a\_ d1js3a\_ d3rcha\_ d3k40a\_ d2cfba1 d1dfoa\_ d1o69a\_  
d1bj4a\_ d3k28a\_ d2bwpa\_ d3lg0a\_ d2fnua\_ d3ou5a\_ d1z7da1 d1iaya\_  
d4msoa\_ d1bs0a\_ d1s0aa\_ d1sffa\_ d3tqxa\_ d1mdoa\_ d3qboa\_ d3pgya\_  
d1bjna\_ d2dkja\_ d1ejia\_ d1vefa1 d4wxga\_ d3bs8a\_ d3gbxa1 d1w23a\_  
d1u08a\_ d1lc5a\_ d1b5pa\_ d2ay1a\_ d3pd6a\_ d7aata\_ d2csta\_ d1j32a\_  
d1fg7a\_ d4wlha\_ d1o4sa\_ d1v2da\_ d1gdea\_ d1m6sa\_ d1v72a1 d1svva\_  
d1ajsa\_ d1wsta1 d2f8ja2 d1lk9a\_ d1vp4a1 d1xi9a1 d2gb3a1 d1yaaa\_  
d1r0ka3 d1j5pa3 d1vkoa2 d1vm6a2 d3qvsa2 d1gr0a2 d2tbvc\_ d1x36a\_  
d1smvc\_ d1ng0c\_ d4sbvc\_ d1lopa\_ d1f2nc\_ d1fwx1 d1libya\_ d1f56a\_  
d1bypa\_ d1azca\_ d1ws8a\_ d3u25a\_ d1cuoa\_ d1id2a\_ d1rkra\_ d2iaac\_  
d4dp1x\_ d1nwpa\_ d2gima\_ d2i7sa\_ d1qhqa\_ d1gyca3 d1hfua2 d1kbva1  
d1kbva2 d1sdda1 d1sdda2 d1gyca2 d1mzya1 d2bw4a1 d1aoza1 d1aoza3  
d1aoza2 d1kyaa2 d1kyaa3 d1kyaa1 d1mzya2 d4e9sa1 d1sddb1 d1sddb2  
d1hfua1 d1hfua3 d1oel1a2 d1oel1a1 d1v10a2 d1v10a3 d1v10a1 d1a3qa1  
d1liknc\_ d3brda1 d1p7h11 d1oy3c\_ d1imhc1 d1zk9a1 d2cxka1 d2bema\_  
d1pama1 d1ea9c1 d1qhoa1 d2fhfa2 d2fhfa1 d1k3ia1 d1j0ha1 d1cxl1a1  
d2bhua1 d1edqa1 d1f1sa2 d1ut9a2 d1gvia1 d1txka1 d1zx5a1 d1qwra\_  
d2phla2 d2phla1 d1fxza2 d1fxza1 d1lrha\_ d1uija1 g1dgw.1 d2v09a\_  
d1uika2 d1uika1 d1dgwa\_ d1ep0a\_ d2pa7a1 d1wlta1 d1nxma\_ d2c0za1  
d1ds6b\_ d1fstb\_ d3us3a3 d3us3a1 d1v70a\_ d2f4pa1 d1yhfa1 d2b5ea2  
d2b5ea3 d2b5ea1 d2b5ea4 d2kp1a1 d2kp2a1 d1hyua3 d1hyua4 d1j08a1  
d1j08a2 d1yloa2 d1y7ea2 d1y0ya3 d1lfwa1 d1vixa1 d1fnoa4 d1vhua2

d1ysja1 d1vhea2 d1z2la1 d2fvga2 d1vgya1 d1r3na1 d2grea2 d1xmba1  
g1q7l.1 d1rtqa\_ d1h32a1 d2bjca1 d2hsga1 d1qpza1 d1efaa1 d1mqta\_  
d1d4m3\_ d1fmd3\_ d2mev1\_ g1aym.1 d1ev13\_ d4q4w1\_ d1r1a3\_ d2x5ia\_  
d1rhi1\_ g1r1a.1 g1d4m.1 g1rhi.1 d1b35b\_ d1loopa\_ d1tme1\_ d4iv1a\_  
g1pvc.1 g1fpn.1 d1fpn1\_ d4gb31\_ d1d4m1\_ d1fmd1\_ d1ev11\_ d2wzr3\_  
d1qqp3\_ g1fmd.1 d2x5ic\_ d1rhi3\_ g1oop.1 d1hxs1\_ g1hxs.1 d1fpn3\_  
d1bev1\_ g2mev.1 d1eah3\_ d1aym1\_ d1pvc3\_ d1qqp1\_ d1zba3\_ d1h8ta\_  
d3vbhc\_ g1b35.1 g1bev.1 d1hxs3\_ g1ev1.1 d1bev3\_ g1tmf.1 d1tmf1\_  
d1b35a\_ d2mev3\_ g1eah.1 g1h8t.1 d1eah1\_ d4q4w3\_ d1r1a1\_ d1aym3\_  
d1pvc1\_ d1zba1\_ d1h8tc\_ d1oopc\_ d1tme3\_ g1qqp.1 d4iv1c\_ g1tme.1  
d1e3oc2 d1lic8a2 d2ovga\_ d1sq8a\_ d1rzsa\_ d3kz3a\_ d3orca\_ d3gpdg2  
d2q49a2 d1hdgo2 d2g17a2 d2cvoa2 d2czca1 d3pwka2 d1obfo2 d1i32a2  
d1zyao2 d2pkqo2 d1b7go2 d2hjsa2 d1cf2o2 d1vkna2 d1nvmb2 d2m9wa1  
d3dfxa\_ d2msya\_ d2djoa1 d2r5za\_ d1au7a1 d1f43a\_ d2lmda1 d1akhb\_  
d1s7ea1 d3nara\_ d1zq3p1 d2craa1 d1mija\_ d4uuta\_ d3a01a\_ d1x58a1  
d3rkqa1 d3cmya1 d2cqxa1 d2da6a1 d1e3oc1 d1fjla\_ d1mh3a1 d1ig7a\_  
d1x41a1 d1wh7a1 d1gt0c1 d2mw8a\_ d1lfup\_ d1x2ma1 d1b72a\_ d1wi3a1  
d1jgga\_ d1wjha1 d1x2na1 d1mnm\_ d2cuea1 d3k2aa\_ d2hosa\_ d2jwta2  
d1pufa\_ d1octc1 d2hi3a\_ d1b8ia\_ d4j19a\_ d3lnqa\_ d1wh5a1 d1b8ib\_  
d1fexa\_ d2cqra1 d1guua\_ d1ug2a1 d2cqqa1 d2ajea1 d4a69c\_ d1h8ac1  
d2crga1 d2iw5b1 d1xc5a1 d2cu7a1 d1wgxa1 d2cjja1 d2ckxa1 d1gvda\_  
d1hcra\_ d1tc3c\_ d1gdta1 d1u78a2 d6paxa2 d1k78a1 d1k78a2 d1ligna2  
d2iu5a1 d1zk8a1 d2g7sa1 d2fd5a1 d2np5a1 d1z0xa1 d2id6a1 d2d6ya1  
d2i10a1 d1vi0a1 d2oi8a1 d3c07a1 d2ns7a1 d2fq4a1 d2yvea1 d1t33a1  
d2o7ta1 d1rkta1 d2np3b1 d2g7ga1 d2gena1 d2fbqa1 d2g7la1 d2gfna1  
d2g3ba1 d2jj7a1 d2hyja1 d1sgma1 d1ui5a1 d2hkua1 d2id3a1 d4jyka1  
d1b10a2 d1d5ya1 d1d5ya2 d1prtc2 d3lv8a\_ d1s3ga1 d1zaka1 d1s4qa\_  
d3tvta2 d1uf9a\_ d1khta\_ d1ckea\_ d1osna\_ d1p5zb\_ d4tmka\_ d3cm0a\_  
d1tmka\_ d1jaga\_ d3h86a\_ d1t0hb\_ d1nn5a\_ d2h92a\_ d3kb2a1 d2c95a1  
d1yj5a2 d1kgda\_ d1ly1a\_ d2ak3a1 d1vyva2 d1deka\_ d2grja1 d1p3ja1  
d1y63a\_ d1e4ya1 d1s96a\_ d3iija1 d1lvga\_ d1nksa\_ d1vyua2 d4e22a\_  
d1qf9a\_ d1jjva\_ d1q3ta\_ d1ki9a\_ d1lw7a2 d1teva\_ d1kjwa2 d1gsia\_  
d1g3ma\_ d1j99a\_ d1t8ta1 d1fmja\_ d1zrha\_ d1ls6a\_ d2a3ra\_ d1aqua\_  
d2zptx\_ d3ckla\_ d1texas\_ d1q44a\_ d2gwha\_ d1odfa\_ d4gi7a\_ d2jeoa1  
d1rz3a\_ d1z0ja1 d3umra2 d3gj0a1 d2gaoa1 d1yzga1 d1x3sa1 d1g7sa4  
d1puja\_ d1udxa2 d1kk1a3 d2o52a\_ d1jwyb\_ d1zcaa2 d1zcba2 d2fv8a1  
d2cjwa\_ d3dz8a1 d1xzpa2 d1vg8a\_ d4qxaa\_ d2ew1a1 d1x1ra1 d2bcgy\_  
d3doea1 d3cona\_ d3rega\_ d3wyga\_ d1upta\_ d2b6ha1 d1zd9a1 d1lnza2  
d1r5ba3 d1n0ua2 d1r2qa\_ d2f91a1 d2rhda\_ d3q3jb\_ d3q85a\_ d1efma1  
d1r8qa\_ d2gf9a1 d2akab1 d1ek0a\_ d1z08a1 d2gcoa1 d2dy1a2 d4g01b\_  
d2cxxa1 d1svia\_ d3q72a\_ d1ni3a1 d4ac9a4 d2erxa1 d2bmea\_ d1wxqa1  
d2gf0a1 d4ldja1 d1zunb3 d1d5ca\_ d4lv5b\_ d1efca3 d1kmqa\_ d2g6ba1  
d3lrpa\_ d1tada2 d2y8ea\_ d4rd4a1 d1z06a1 d2heia\_ d3a58b\_ d1u01a2  
d1d2ea3 d1zj6a1 d2ocba\_ d3rwoa\_ d1mr3f\_ d2e9sa1 d4u5xa1 d2iwra\_

d2fn4a1 d3bwdd\_ d2nzja1 d2atva1 d2ksqa\_ d3l43a\_ d1mkya2 d1mkya1  
d1wmsa\_ d1jn3ya3 d2rmka\_ d1f6ba\_ d1f60a3 d1gota2 d1jala1 d2fh5b1  
d1g16a\_ d2wblc\_ d1m7ba\_ d1wf3a1 d1f5na2 d1t9ha2 d1z6xa1 d1z0aa1  
d2fg5a1 d2a5ja1 d2bcjq2 d1s0ua3 d1ky3a\_ d4y0va\_ d4lhwa\_ d2qmea1  
d2atxa1 d1egaa1 d1ryha\_ d1moza\_ d1nrjb\_ d2erya1 d3bfka\_ d1puia\_  
d1fzqa\_ d3j3az1 d3t5ga\_ d1shza2 d3defa\_ d2f7sa1 d3raba\_ d3tsoa\_  
d3aq4a\_ d2a17a1 d3sfva1 d3bc1a\_ d2ncda\_ d1sdma\_ d3h4sa1 d2heha\_  
d2grya\_ g3kin.1 d1kk8a2 d1br2a2 d1goja\_ d1f9va\_ d2mysa2 d1lkxa\_  
d3t0qa\_ d4db1a1 d3gbja\_ d1ry6a\_ d1v8ka\_ d1k8ka2 d1k8ka1 d3uleb1  
d3i33a2 d3i33a1 d1dkgd2 d1dkgd1 d4ci6a2 d1jcfa1 d4a2ba2 d2fxua1  
d1yaga2 d1yaga1 d4cbua2 d1bupa2 d1g99a2 d2e1za2 d2e1za1 d1saza1  
d1saza2 d1iqca2 d1iqca1 d1eb7a2 d1eb7a1 d1nmla2 d3h3no1 d3h3no2  
d3ezwa2 d1zc6a1 d1zbsa1 d1zbsa2 d1zc6a2 d2ch5a2 d2ch5a1 d1zxaa2  
d1zxaa1 d2d0oa3 d2d0oa2 d1nbwa2 d1hroa\_ d4gedb\_ d3zooa\_ d1mz4a\_  
d1gu2a\_ d1f1fa\_ d1dvva\_ d1c6ra\_ d1c75a\_ d1e29a\_ d1gdva\_ d1cnoa\_  
d1h32b\_ d1co6a\_ d2bh4x\_ d2aiua\_ d5cytr\_ d1jdl\_ d1i8oa\_ d2zboa\_  
d3dmia\_ d1ls9a\_ d1wvec\_ d2yk3a\_ d3ph2b\_ d1dw0a\_ d5aura\_ d1ql3a\_  
d1qn2a\_ d1f1ca\_ d4zzva\_ d2xspa\_ d1eg1a\_ d4v20a\_ d4ipma1 d1gpia\_  
d4csia\_ d3pfza\_ d3ovwa\_ d2yoka\_ d2nqya\_ d1h4ga\_ d1hixa\_ d1oa2a\_  
d1olra\_ d3b7ma\_ d4h7ma1 d3wp3a\_ d2vgda\_ d1igoa\_ d3zsea\_ d3wx5a\_  
d1oa3a\_ d1pvxa\_ d1m4wa\_ d1f5ja\_ d1oa4a\_ d1ks5a\_ d4ixla1 d1evsa\_  
d1cnt1\_ d1pvhb\_ d1z7ca\_ d1huwa\_ d1bgea\_ d1rhga\_ d1f6fa\_ d1f45b\_  
d1i1rb\_ d1axia\_ d1letea\_ d3tgxb\_ d1scfa\_ d2z3qa1 d3qbl\_ d1m48a\_  
d4nkqb\_ d1eera\_ d1v7mv\_ d5e4ea\_ d2o27a\_ d3b5ka\_ d2psma1 d4zf7a\_  
d3uf5a\_ d4x51a\_ d4ypgc1 d3oq3a\_ d1lqsl\_ d1n1fa\_ d1aula\_ d1wu3i\_  
d3bes1\_ d3ux9a\_ d3rbaa\_ d2qtra\_ d1nupa\_ d3l92a\_ d1f9aa\_ d1qjca\_  
d2h29a\_ d1vlha\_ d1od6a\_ d1lw7a1 d1mrza2 d4ruka\_ d3wdpp1 d3wq5a\_  
d1gnxa\_ d4gxpa\_ d4hz8a\_ d1e4mm\_ d3aiua\_ d1wcga1 d3ahxa\_ d1v02a\_  
d2dgaa\_ d1pbga\_ d1vffa1 d1qoxa\_ d4ha4a\_ d2e17a\_ d1iq0a2 d1irxa2  
d1r6ta2 d1livsa4 d2cyba\_ d1rqga2 d1j09a2 d2yxna\_ d1f7ua2 d1h3fa1  
d1ffya3 d2g36a1 d1nzja\_ d1n3la\_ d1i6la\_ d1pfva2 d1h3na3 d3n9ia\_  
d3sz3a1 d3sw2a\_ d1moxc\_ d1dx5i3 d1edmb\_ d1aut12 d1aut11 d1dva11  
d1szba2 d1kigl\_ d2y5fl\_ d1ijqa2 d1gk5a\_ d1g1sa2 d1nt0a3 d1xdtr\_  
d1lmja2 d1lmja1 d1nzia2 d2wphe\_ d1klil\_ d1pfx12 d1pfx11 d1p9ja\_  
d1glta2 d1f7ea\_ d4yzub\_ d2y5ia\_ d1psra\_ d3n22a\_ d2egda\_ d4ggfc\_  
d2wcea\_ d2luca\_ d4aqia\_ d3nsia\_ d2lp3a\_ d1j55a\_ d1a4pa\_ d1k8ua\_  
d1nsha\_ d1exra\_ d1tiza1 d1nyaa\_ d1g8ia\_ d1ggwa\_ d1wdcc\_ d3fwba\_  
d1ggza\_ d2o5ga\_ d1ctaa\_ d1m45a\_ d3i5gc\_ d1sl8a\_ d1fpwa\_ d2scpa\_  
d2roaa\_ d4aqra\_ d3pn7b\_ d1br1b\_ d2mysb\_ d1s6ca\_ d1bjfa\_ d2obha\_  
d1jfka\_ d1jf0a\_ d1qv0a\_ d1lkja\_ d2mlfc\_ d2m97a\_ d2d8na\_ d4by5a\_  
d1jbaa\_ d4nqga\_ d1wdcb\_ d2mysc\_ d1j7qa\_ d1s6ia\_ d1uhka2 d1r2ua\_  
d1dtla\_ d3kf9a\_ d3pn7c\_ d1gjya\_ d1y1xa\_ d1hqva\_ d1dvia\_ d1df0a1  
d1qxp2 d4usla\_ d1k94a\_ d1jfxa\_ d1wkya2 d1uuqa\_ d3wh9a\_ d4mlra\_  
d1xyza\_ d4xuya\_ d2je8a5 d4bf7a1 d3cuia\_ d1ur4a\_ d1qw9a2 d1lodza\_



d2vzsa5 d1bqca\_ d2x2ya1 d1hjqa\_ d1qnra\_ d4y7ea1 d1vjza\_ d4k68a\_  
d2v3ga\_ d4hpga\_ d1nofa2 d1nq6a\_ d1h4pa\_ d1aq0a\_ d3ziza\_ d4bs0a\_  
d1ecea\_ d1h1na\_ d1ta3b\_ d1w91a2 d1i1wa\_ d1uhva2 d1us3a2 d1egza\_  
d7a3ha\_ d1tvna1 d3nyda1 d1ghsa\_ d2cyga1 d4xv0a\_ d2c8na2 d1w32a\_  
d3emca\_ d1v6ya1 d1foba\_ d2uwfa1 d2fgla\_ d3niya1 d2c0ha1 d1rh9a1  
d1yq2a5 d1szna2 d1fa2a\_ d1pama4 d5do8a1 d1ea9c3 d2fhfa5 d1qhoa4  
d1avaa2 d1m53a2 d4m8ua1 d2gjpa2 d1lwha2 d4howa1 d1ktba2 d1j0ha3  
d3vm5a1 d2x1ia\_ d1wzaa2 d1uasa2 d2diea1 d1mxga2 d1ht6a2 d1eswa\_  
d1iv8a2 d5cpsa\_ d1ud2a2 d1zjaa1 d3gbea1 d1kwga2 d1wdpa\_ d1gcya2  
d1g5aa2 d1hvxa2 d3dhpa2 d2bhua3 d4do4a1 d3qgva1 d1e43a2 d1g94a2  
d2d3na2 d1gjwa2 d1gvia3 d1x1na1 d1r7aa2 d1tz7a1 d3ljqa\_ glk2x.1  
d4c7ga2 d2gjxa1 d1nowa1 d1jaka1 d1yhta1 d4toqa\_ d1wb0a1 d1w9pa1  
d1eoka\_ d1itxa1 d1kfwa1 d1goia2 d1edqa2 d2gsja\_ d1hjxa1 d1vf8a1  
d1etob\_ d1umqa\_ d1g2ha\_ d1t77a2 d1mixa2 d1e5wa2 d1j19a2 d1isna2  
d2a16b2 d3syxa1 d1mkea1 d2p8va\_ d1xoda1 d1i7aa\_ d1evha\_ d1egxa\_  
d2hmta\_ d1lssa\_ d1iuka\_ d2csua1 d3q9ub\_ d2yv1a1 d3q9na\_ d2d59a\_  
d2yv2a1 d1euca1 d1y81a1 d1wgqa1 d1v89a1 d2coda1 d1zc3b\_ d1wg7a1  
d1u5ea1 d1v61a1 d2coca1 d2ys1a1 d1v5pa1 d1ntya2 d1wjma1 d1wil1a1  
d1u29a\_ d1xx0a1 d1unqa\_ d2zkmx3 d1v88a1 d2adza1 d1x1fa1 d1p6sa\_  
d2coaa1 d1btka\_ d1v5ma1 d1faoa\_ d2x18a\_ d1dyna\_ d1x1ga1 d4kaxb\_  
d2j59m1 d1ki1b2 d1xcga2 d1txda2 d1u5da1 d1dbha2 d1wlha\_ d1upqa\_  
d1v5ua1 d1foea2 d2fjla1 d1eaza\_ d2dfka2 d2cofa1 d1kz7a2 d1h6ta1  
d9ldta1 d2ewda3 d1up7a1 d2dfda1 d1s6ya1 d1vjta1 d7mdha1 d1hyea1  
d1t2da1 d1ojsa3 d1ldna1 d1hyha1 d1civa1 d2a92a1 d1ez4a1 d1i0za1  
d1y6ja1 d1gv0a1 d1ur5a1 d1l1da1 d1obba1 d1v8ba1 d1gdha1 d1l7da1  
d2dl1da1 d1mx3a1 d1ygya1 d1qp8a1 d1li4a1 d1j4aa1 d1npya1 d3t4ea2  
d1a4ia1 d1o0sa1 d2hk9a2 d2egga2 d1b26a1 d1bvua1 d1gg2a1 d1c1da1  
d1leha1 d1gtma1 d1euzal d1nvtal d3dona2 d1edza1 d1vi2a1 d1p77a1  
d1nyta1 d1b0aa1 d1vl6a1 d1v91a1 d1txga2 d3f47a1 d1mv8a2 d2pv7a2  
d1xc2a3 d2ahra2 d4xiya1 d2f1ka2 d1pgja2 d1i36a2 d1np3a2 d1lj8a4  
d1teaa3 d1qmga2 d2i76a2 d2g5ca2 d1wdka3 d1dlja2 d3cuma3 d1kola2  
d1f8fa2 d1qora2 d1jqba2 d1vj0a2 d1cdoa2 d1gu7a2 d1d1ta2 d1xa0a2  
d2dm6a2 d1jvba2 d1rjwa2 d1h2ba2 d1tt7a2 d1piwa2 d1o89a2 d1iz0a2  
d1e3ja2 d1yb5a2 d1uufa2 d1vj1a2 d1e3ia2 d3gpdg1 d1vc2a1 d2nvwal  
d1u8fo1 d1ydwa1 d1hdgo1 d2g17a1 d1cf2o1 d2czca2 d1r0ka2 d1obfo1  
d2cvoa1 d1ebfa1 d1h6da1 d1i32a1 d1zh8a1 d2q49a1 d1qkia1 d3pzra1  
d1xeaa1 d1vkoa1 d1vm6a3 d3qvsa1 d2pkqo1 d1b7go1 d1gr0a1 d1p1ja1  
d1lc0a1 d1j0xo1 d3pwka1 d2hjsa1 d1zyao1 d1vkna1 d1tlta1 d1nvmbl  
d3sjua\_ d3ojfa1 d1xu9a1 d2jjya1 d1n7ha\_ d1ylpa1 d1h5qa\_ d1jtva\_  
d4fs3a\_ d2bkaa1 d1gy8a\_ d2c5aa1 d1ulsa\_ d1ooea\_ d2b69a1 d1y5ma1  
d1spxa\_ d1aela\_ d1ydea1 d1gega\_ d1hdoa\_ d1o5ia\_ d1e6ua\_ d1snya1  
d2rhca\_ d3zv4a\_ d5ceja\_ d2d1ya1 d1fjha\_ d3w8ea\_ d2fmua1 d1x1ta\_  
d1rpna\_ d3ay7a1 d1k2wa\_ d1eq2a\_ d2hrba1 d3ruaa\_ d2ew8a1 d4hwka\_  
d1xgka\_ d2bd0a1 d1yo6a1 d2a35a1 d2ntva\_ d1vl8a\_ d1hdca\_ d4bkua\_

d2ag5a1 d2q45a\_ d1nffa\_ d4iy1a\_ d1zbqa1 d1kewa\_ d1ek6a\_ d1ja9a\_  
d2q46a2 d1iy8a\_ d1cyda\_ d2ptga\_ d1hxha\_ dluzma1 d3lyla\_ d4m89a\_  
d3wyea\_ d2b1la1 d1w6ua\_ d1sb8a\_ d2q2va\_ d4nr0a\_ d1e6wa\_ d2gasa\_  
d3oiga1 d2bgka1 d1mxha\_ d1vl0a1 d1rkxa\_ d1r6da\_ d1wmaa1 d1e7wa\_  
d2c07a1 d1xkqa\_ d3tzha\_ d1g0oa\_ d3lz6a\_ d1qyca\_ d1ledoa\_ d1gz6a\_  
d1oc2a\_ d1t2aa\_ d1zema1 d2xoxa\_ d1z45a2 d1geea\_ d1p33a\_ d3lt0a\_  
d4e6pa\_ d2wyua\_ d1db3a\_ d4q9na\_ d1xhla\_ d4o1ma\_ d1fmca\_ d2uvda\_  
d2gdza1 d1uaya\_ d2z1ma\_ d2o23a2 d2fr1a2 d2fr1a1 d1qsga\_ d1qyda\_  
d4zjua\_ d2a4ka1 d1yb1a\_ d1wvga1 d1yxma1 d3f4ba\_ d1mg5a\_ d1xg5a1  
g1y43.1 d3nqyb\_ d4gera\_ d1bqba\_ d1cmxa\_ d1xd3a\_ d3ifwa\_ d1g0da4  
d2f4ma1 d1x3za\_ d3i2ka1 d1lnsa3 d1mpxa2 d2w0pa\_ d2diaa1 d2e9ia2  
d2e9ja1 d2dj4a1 d2eeba1 d2diba1 d2dmba1 d2dmca1 d2d7oa1 d2ee6a1  
d2d7pa1 d2eeaa1 d2di8a1 d1wlha1 d2d7na1 d2nqca\_ d2d7ma1 d2dica1  
d3cnka\_ d2k3ta1 d2eeca1 d1qfha1 d1qfha2 d2bp3a1 d1v05a\_ d2ee9a1  
d2eeda1 d2di9a1 d3ioqa\_ d1fh0a\_ d1o0ea\_ d1khqa\_ d1m6da\_ d2cb5a\_  
d1cs8a\_ g8pch.1 d1s4va\_ d2pnsa\_ d1vsna1 d1mira\_ d1iwda\_ d2oula\_  
d7pcka\_ d3bwka\_ d3bcna\_ d2p86a\_ d1pvja\_ d1pcia\_ d1gece\_ d1deua\_  
d4bs6a\_ d1xkga1 d1cqda\_ d1jqpa2 d2c0ya\_ d2bdza\_ d3p5ua\_ d1pv8a\_  
d1w5qa\_ d2c1ha\_ d1ohla\_ d1zbf1a1 d2z1ha\_ d2etja1 d3qioa1 d1j11a\_  
d2e41a\_ d1j12a\_ d21sna1 d1io2a\_ d1uaxa\_ d2yv0x\_ d1mu2a1 d1ekea\_  
d1i39a\_ d1s5ja1 d2hbja2 d2igia\_ d1wlja\_ d1qhta1 d4dlea1 d2f96a1  
d3tr8a1 d3mxma\_ d1q8ia1 d1y97a1 d1w0ha\_ d1kfsa1 d2py5a1 d1noya\_  
d1d5aa1 d1yt3a3 d2guia\_ d3mwpal d4kb1a\_ d1b9ra\_ d1offa\_ d1frfa\_  
d3wcqa\_ d1e9ma\_ d1l15pa\_ d1wria\_ d1i7ha\_ d3av8a\_ d1czpa\_ d1rfka\_  
d3p1ma1 d3b2ga\_ d2bt6a2 d3nvva1 d1krha3 d2h88b1 d1n62a2 d1t3qa2  
d1kf6b2 d1zoyb1 d1jq4a\_ d1dgja2 d1rm6c2 d1jmx2a2 d1pbya1 d1pbya2  
d1r7ha\_ d1faaa\_ d1wika1 d1xfla\_ d1ttza1 d2f51a1 d1ti3a\_ d1nhoa\_  
d1sena\_ d2i4aa\_ d1ep7a\_ d1zmaa1 d1fo5a\_ d3lefa1 d3diea1 d2yana1  
d1z6na1 d1oaza\_ d3zywa1 d4aj8a\_ d1nm3a1 d4fiwa\_ d1wmja\_ d4hs1a1  
d1iloa\_ d1xwaa1 d1wjka1 d2vm1a\_ d1fb6a\_ d1gh2a\_ d1h75a\_ d1nw2a\_  
d1kx5b\_ d3a6na\_ d4m6ba2 d2nqbd\_ d3wkjd\_ d2yfwe\_ d4h9na\_ d5bnxa\_  
d1kx5c\_ d3r45a\_ d1eqzb\_ d4jjnb\_ d1f66c\_ d1eqza\_ d4wnnb\_ d1kx5a\_  
d1u35c1 d1id3a\_ d2nqbc\_ d1kx5d\_ d1f1ea\_ d1b67a\_ d1bh9b\_ d1tafb\_  
d1jfib\_ d1q9ca\_ d1h3ob\_ d2byka1 d1n1ja\_ d4g92b\_ d1bh9a\_ d1jfia\_  
d1h3oa\_ d2bykb1 d1n1jb\_ d1pd212 d1nhya2 d2a2ra2 d1k0dd2 d1f2ea2  
d1gsua2 d1f3ba2 d2fhea2 d2pvqa1 d1tw9a2 d1oyja2 d1e6ba2 d1k0ma2  
d3ik7a1 d4is0a1 d1r5aa2 d1j1va2 d1m0ua2 d3gtub2 d1z9ha2 d1lokta2  
d1axda2 d2gsra2 d1tu7a2 d1k3ya2 d1zgm1a1 d1b48a2 d1gnwa2 d1gwca2  
d2gsta2 d1glqa2 d1oe8a2 d1pn9a2 d1v2aa2 d1fw1a2 d1duga2 d1lovna2  
d1lig8a1 d1czan2 d1czan3 d1czan1 d1lig8a2 d1czan4 d1bg3a4 d1bg3a3  
d1bg3a2 d1nira1 d1qksa1 d3h1jd1 d1qqya\_ d1f6ra\_ d1livma\_ d2gv0a\_  
d1iiza\_ d2z2fa\_ d1j8xa\_ d1ghla\_ d1b9oa\_ d1741a\_ d1691a\_ d2o4wa\_  
d1p37a\_ d1k28a3 d1xjta1 d1jtma\_ d2f2qa\_ d4e97a1 d1iyka2 d1rxta1  
d1iica2 d1iica1 d2k4ua\_ d1hp2a\_ d2lu9a\_ d1baha\_ d2meoa1 d1wm7a\_

d1hlya\_ d1n8ma\_ d1j1za\_ d1wpda\_ d1c55a\_ d1pvza\_ d1wt7a\_ d1wz5a\_  
d1m2sa\_ d1pjva\_ d1c49a\_ d1qkya\_ d2ktca1 d1wmta\_ d1du9a\_ d1j5ja\_  
d1r1ga\_ d1mpya2 d1kw3b2 d1kw3b1 d4ghga1 d1tfza1 d3isqa1 d3isqa2  
d1sqia1 d1sqia2 d1lkda2 d1lkda1 d1mpya1 d1cjxa2 d1sp9b2 d1t47a1  
d1t47a2 d1flua2 d1sp8a1 d1sp8a2 d1flua1 d4iuaa3 d4bvva\_ d3k65a\_  
d1ki0a3 d1ki0a2 d1ki0a1 d1a0ha1 d1pmla\_ d3sp8a3 d2feba1 d1qsta\_  
d2beia1 d4m3sa\_ d1u6ma1 d1ygha\_ d1yk3a1 d3dr6a\_ d1xmta\_ d1z4ea1  
d2ge3a1 d1bo4a\_ d2fiaa1 d2jdca1 d1y9wa1 d3to7a\_ d1wwza1 d2fl4a1  
d2ozua1 d2b5ga\_ d2cy2a1 d2p0wa\_ d1cm0a\_ d4pswa\_ d1yrea1 d1yr0a1  
d1m4ia\_ d2gana1 d1yvka1 d2g3aa1 d1y7ra1 d2euia1 d1q2ya\_ d2fsra1  
d1xeba\_ d2ae6a1 d1cjwa\_ d1qsmas\_ d2aj6a1 d1y9ka1 d1i12a\_ d1vkca\_  
d2atra1 d1n71a\_ d2d4pa1 d2fiwa1 d2fe7a1 d1tiqa1 d2ou2a\_ d1yx0a1  
d2fcka1 d1p0ha\_ d2j8ma\_ d2pq8a\_ d1z4ra1 d1s3za1 d1ufha\_ d1xvqa1  
d1pn0a2 d3hy2a\_ d2cvba1 d1o8xa\_ d1lu4a\_ d1we0a1 d2bmxa1 d2a4va1  
d1psqa\_ d1xiya1 d1q98a\_ d1n8ja\_ d1zofa1 d2ggta\_ d3tjja\_ d4je1a1  
d1o73a\_ d3s9fa\_ d2zcta\_ d1qmva\_ d1jfua\_ d2b1ka\_ d5dvba1 d2b5xa1  
d2v2ga\_ d1st9a\_ d3tb2a\_ d4llra\_ d4fh8a1 d1e2ya\_ d1knga\_ d2h30a\_  
d1i5ga\_ d2z9sa\_ d2f8aa1 d1tp9a1 d2b7ka\_ d1nm3a2 d3hvva\_ d2wfca1  
d4kcea\_ d1xvwa1 d4gqca1 d3qpma\_ d4k1fa\_ d1zzoa1 d1gp1a\_ d1prxa\_  
d4od7a1 d1z6ma1 d4mcua1 d4dvca1 d3l9sa\_ d1un2a\_ d3rppa\_ d1zsqal  
d2m5ta\_ d1cqqa\_ d1wqsa\_ d5bpea\_ d2ipha\_ d1lvoa\_ d2bhga1 d3tnta\_  
d3sjia\_ d3d23a1 d2fyqa\_ d3tloa\_ d3zvea1 d2hrva\_ d3q3ya1 d4asha1  
d1e88a1 d1l6ja5 d1l6ja4 d1eaka4 d1eaka3 d1l6ja3 d1h8pa1 d1w52x1  
d2ppla1 d1hpla2 d1lpbb2 d2oxea1 d1bu8a2 d1rp1a2 d1ys1x\_ d4hs9a\_  
d1lspa\_ d1ex9a\_ d1ku0a\_ d3qmma\_ d1n9wa1 d1bbua1 d1e1oa1 d1c0aa1  
d1l0wa1 d3a74a1 d1eova1 d1lgya\_ d4l3wa\_ d1llfa\_ d1gz7a\_ d1ukca\_  
d1cr6a2 d1bvsa3 d1ixra2 d3groa\_ d1pjaa\_ d1thta\_ d1svpa\_ d1mbma\_  
d3su6a1 d1cula1 d4agka\_ d1vcpa\_ d1q31a\_ g1n11.1 d3e90b\_ d1ep5a\_  
d3u1jb\_ d3zxha\_ d1cgl\_a\_ d1rm8a\_ d1eaka2 d1hy7a\_ d2jsda\_ d1cxva\_  
d1hv5a\_ d1i76a\_ d3p0ya1 d1igra1 d1igra2 d1n8yc2 d1n8yc1 d1m6ba2  
d1m6ba1 d1dzka\_ d4tlja\_ d2a2ua\_ d4wfva\_ d3tlda\_ d4iaxa\_ d3zq3a\_  
d2nnda\_ d1i4ua\_ d1kxoa\_ d1bbpa\_ d1kt7a\_ d1exsa\_ d3s26a1 d1lf7a\_  
d1qfta\_ d4gh7a\_ d1z24a1 d1qabe\_ d1xkia\_ d1ew3a\_ d3bx7a\_ d4iawa1  
d1n0sa\_ d1gkab\_ d3kzaa\_ d2k23a\_ d2l9ca1 d2joza1 d1gm6a\_ d3kffa\_  
d3saoa1 d1yupa1 d1iiua\_ d1lmra\_ d1cixa\_ d1y29a\_ d1v7fa\_ d2jtba\_  
d1dlha\_ d1g9pa\_ d1lupa\_ d1mb6a\_ d2a2va\_ d1niya\_ d1i25a\_ d1hvwa\_  
d2mpqa\_ d1ie6a\_ d1kqha\_ d1la4a\_ d2mxoa1 d1dl0a\_ d1koza\_ d1qk6a\_  
d1emxa\_ d1lqra\_ d1c6wa\_ d1rmka\_ d1lxta\_ d1eyoa\_ d1cna\_ d1fu3a\_  
d1glpa\_ d1f3ka\_ d1rypd\_ d1lrua\_ d1rypc\_ d3unfk\_ d1rypa\_ d1j2pa\_  
d1lru1\_ d1j2qh\_ d3unfh\_ d1m4ya\_ d1rypb\_ d1lru2\_ d1q5rh\_  
d1rypg\_ d1g3ka\_ d1lru1\_ d1q5qa\_ d1e94a\_ d1lru1\_ d1ryph\_ d3ty6a\_  
d1lruj\_ d1lruk\_ d1rype\_ d1lru1\_ d1lru1\_ d3mi01\_ d1rypf\_ d1lruh\_  
d2z3ba\_ d1lru1\_ d3mka2\_ d1lru1\_ d1jgta2 d1ofda3 d1ea0a3 d1ecfa2  
d1q15a2 d1ct9a2 d1te5a\_ d3ubub\_ d1egia\_ d1qo3c\_ d1v7pa\_ d1tdqb\_

d3ubua\_ d1c3ab\_ d1h8ua\_ d3bx4b\_ d1t8ca1 d1sb2a1 d1qdda\_ d2ziba1  
d3cada\_ d1byfa\_ d1j34b\_ d1jwia\_ d1jzna\_ d1c3aa\_ d1oz7b\_ d1wmza\_  
d3bdwb\_ d1hq8a\_ d1fifa1 d1dv8a\_ d3hupa\_ d1wk1a1 d1umra\_ d2afpa\_  
d3bx4a\_ d1gz2a\_ d1sl6a\_ d1v7pb\_ d3g8ka\_ d1ixxa\_ d1j34a\_ d1jwib\_  
d1g1sa1 d1y17a1 d1ja3a\_ d1fvub\_ d3bdwa\_ d1sb2b1 d1fvua\_ d1umrc\_  
d1oz7a\_ d4m17a\_ d3cfwa1 d1ypqa1 d1g1ta1 d3fd4a\_ d3l9jc\_ d4dn8a1  
d1v41b\_ d1rd1l\_ d2msba\_ d4w9ta\_ d1jvna1 d4x2ra1 d1ka9f\_ d1qo2a\_  
d4axka1 d1thfd\_ d4u28a\_ d2y88a\_ d4wd0a\_ d1vzwa1 d3exra\_ d2ffca1  
d2fdsa1 d3n3ma1 d2czda\_ d1q6oa\_ d2yyua\_ d1vqta1 d1dbta\_ d3ldva1  
d1rw1a\_ d1z3ea1 d3l78a\_ d4lt9a1 d3tc7a1 d3hoja\_ d1i4na\_ d3vnda\_  
d3nl8a1 d1geqa\_ d3naval d1v5xa\_ d4a2ra1 d3tc6a1 d1ujpa\_ d4ijba\_  
d1xcfa\_ d1vc4a\_ d1rd5a\_ d1qopa\_ d3b5va\_ d2r80b\_ d1cqxa1 d1cg5a\_  
d1gcvb\_ d3boma\_ d2h8fb\_ d2raoa\_ d3bj1a\_ d4hrrb\_ d2r50a\_ d3d1kb\_  
d2aalb1 d3zhwa\_ d3hf4b\_ d3gdja\_ d1jebb\_ d3bj1b\_ d1x9fb\_ d1wmub\_  
d1gcva\_ d3bcqb\_ d3d4xb\_ d1gvha1 d2dc3a\_ d3hf4a\_ d4yu3a\_ d3k8ba\_  
d1qpwb\_ d2r80a\_ d3bcqa\_ d1v4wa\_ d3wtgb\_ d1j17a\_ d4esaa\_ d1a9we\_  
d3d1ab\_ d1fsla\_ d4h21a\_ d1v4wb\_ d1mwca\_ d1vhba\_ d1jeba\_ d1spgb\_  
d1h97a\_ d1q1fa\_ d1tu9a1 d3d1aa\_ d1hdsb\_ d3hyub\_ d2zffb\_ d3fs4a\_  
d1oj6a\_ d1shrb\_ d4h21b\_ d4yu3b\_ d1spga\_ d3hrwa\_ d3qqra\_ d3at5a\_  
d4wchd\_ d3hyua\_ d1cg5b\_ d1uc3a\_ d1hbra\_ d2raob\_ d1outb\_ d4esab\_  
d3gdjb\_ d3qqqa\_ d1x9fc\_ d3vrfa\_ d1litha\_ d3mkba\_ d3d4xa\_ d3mjpa\_  
d1j16a\_ d3fh9a\_ d1outa\_ d2dc3b\_ d1it2a\_ d3eoka\_ d3g46a\_ d1qpwa\_  
d3vrfb\_ d1ch4a\_ d1x9fd\_ d1hdsa\_ d2zfb\_ d3mkbb\_ d1or4a\_ d3wtga\_  
d1a4fa\_ d3fh9b\_ d3bomb\_ d3cy5a\_ d3at5b\_ d1x9fa\_ d2oifa\_ d4lmbx\_  
d1cpcb\_ d3v57a\_ d1kn1a\_ d1cpca\_ d4f0ta\_ d2vjha\_ d4po5b\_ d1eyxa\_  
d1alla\_ d4f0tb\_ d1b33b\_ d1b8db\_ d4h0mb\_ d1b33a\_ d2vjhb\_ d4lm6b\_  
d2vmlb\_ d1allb\_ d2vjta\_ d3dbja\_ d2vmla\_ d2vjtb\_ d4f0ub\_ d1f99b\_  
d4rmpa1 d1lliaa\_ d1eyxb\_ d2uulb\_ d4lmsb\_ d4f0ua\_ d2bv8a\_ d1f99a\_  
d2bv8b\_ d2c71b\_ d3dbjb\_ d4rmpb1 d1b8da\_ d4h0ma\_ d3v57b\_ d1kn1b\_  
d2uula\_ d2j96a\_ d1kyqa1 g1gxs.1 d1mtza\_ d1k8qa\_ d2xqfa\_ d1f6wa\_  
d1dx4a\_ d1qe3a\_ d1k4ya\_ d4qwwa\_ d2ha2a\_ d1sfra\_ d1f0na\_ d4qeka\_  
d3c8da2 d2pbla1 d1jkma\_ d1jjia\_ d1lzl\_ d2qvba\_ d2v9za\_ d4kafa1  
d1s5ja2 d1qhta2 d4dlea2 d1tgoa2 d3py8a2 d1q8ia2 d1kfsa2 d2py5a2  
d1d5aa2 d3u1ra1 d1g9ka2 d1k7ia2 d1f74a\_ d3l21a\_ d2e1da\_ d1to3a1  
d1w3ia\_ d1sfla\_ d1n7ka\_ d1vcva1 d4imea\_ d1wa3a\_ d2ocza1 d3m16a\_  
d2yxga\_ d1ub3a\_ d3a5fa\_ d1fbaa\_ d1l6wa\_ d1xfba1 d1wx0a1 d1vpxa1  
d1ojxa\_ d1mxsa\_ d2a4aa1 d1xkya1 d3cq0a1 d3s1xa\_ d1f05a\_ d1fdja\_  
d3cpra1 d4d2ja\_ d4mh8a\_ d4i7ga1 d3rp2a\_ glucy.1 d1fuja\_ d2zchp\_  
d3w94a\_ d1si5h\_ d1lo6a\_ g2pka.1 d1cgha\_ d1kigh\_ d1a5ia\_ d3s9ba\_  
d1hj8a\_ d1ao5a\_ d2anya\_ d1q3xa1 d1gvza\_ d1azza\_ d4gsoa\_ d2f91a1  
d1liaua\_ d1gdna\_ d1eufa\_ g1fiw.1 d1eq9a\_ d4nfea\_ d2rdla\_ d1spja\_  
d1elva1 d1a7sa\_ d1ekbb\_ d1pfxc\_ d1yc0a\_ d2aiqa\_ g1fiz.1 d1fi8a\_  
d4k60a\_ d4dgja\_ d1mzaa\_ d1op0a\_ d3tjva\_ d1pytd\_ d1sgfg\_ g1gg6.1  
d2eeka\_ g1rtf.1 d1a0ja\_ d3g01a\_ d1pytc\_ d4e7na\_ d1ddja\_ d1z8ga1

d2hlca\_ d1npma\_ d1brup\_ g1jou.1 d1sgfa\_ d1autc\_ g2hnt.1 g1kdq.1  
d1orfa\_ d3s69a\_ d4crga\_ d1fxya\_ d2ftba\_ d1pmpa\_ d2rcqa1 d1fdqa\_  
d4lkpa\_ d1sa8a\_ d1vyfa\_ d1lpja\_ d3vg7a1 d4azqa1 d5bvqa\_ d1p6pa\_  
d2qo4a\_ d1opba\_ d1yiva1 d1olva\_ d4bvma1 d4tkba\_ d4i3ba\_ d1bwya\_  
d1ftpa\_ d1ggla\_ d4gkca\_ d1cbia\_ d3p6da1 d1kqwa\_ d2a0aa1 d1m4la\_  
d2bk7a\_ d3fjua\_ d1z5ra1 d1kwma1 d1uwya2 d2c1ca1 d1dtda\_ d1h8la2  
d3lgia\_ d3i77a\_ d2z9ia2 d4nsva\_ d1lcya2 d4jcna\_ d1agja\_ d1os8a\_  
d1p3ca\_ d1l1ja\_ d1qtfa\_ d1e69a\_ d1mv5a\_ d3g60a4 g1ii8.1 d1ewqa2  
d1ji0a\_ d1qhla\_ d1v43a3 d2wmfa1 d1vpla\_ d1g2912 d4a82a2 g1f2t.1  
d2d62a1 d3tuic1 d2bbsa1 d3g60a3 d2ixea\_ d1g6ha\_ d1sgwa1 d2qi9c\_  
d3r1fa1 d3b60a1 d3d31a2 d2pzea1 g1xew.1 d1jj7a\_ d1loxxk2 d2onka1  
d1wlwa\_ d1iwea\_ d1qf5a\_ d1vmaa2 d1nija1 d1np6a\_ d2p67a1 d3ihla\_  
d1okkd2 d1ls1a2 d1slma2 d1liona\_ d2v40a\_ d1dj3a\_ d3hida\_ d2vola1  
d2g0ta1 d1vcoa2 d1j8mf2 d1g3qa\_ d1xjca\_ d1p9ba\_ d1qzxa3 d1ihua2  
d1ihua1 d2qm8a\_ d1dj2a\_ d4ioja\_ d1cp2a\_ d1yrba2 d3gqba2 d1skye3  
d1xp8a1 d1tf7a2 d1tf7a1 d1ye8a1 d1skyb3 d2qe7d2 d4blta\_ d4huta\_  
d3l1daa2 d4hyya\_ d2i3ba1 d1cr1a\_ d3j9tb2 d3ntua2 d1vdza1 d2z43a\_  
d1e9ra\_ d1nlfa\_ d3ziaa2 d1n0wa\_ d1g6oa\_ d3ziad2 d3j9ta2 d1pzna2  
d3gqbb2 d2i49a\_ d1nnfa\_ d1xvxa\_ d1ursa\_ d1h3da1 d1iuda\_ d4m1va1  
d1twya\_ d3e13x\_ d2nxoa1 d4pfua\_ d3ttma\_ d1elja\_ d2qmwa1 d1us5a\_  
d1y3na1 d1jeta\_ d1uqwa\_ d4f19a1 d2esna2 d3thia\_ d3fasa1 d2uyeb\_  
d2xwva1 d1r9la\_ d2fyia1 d1pb7a\_ d2ozza1 d1sw5a\_ d1nh8a1 d1vr5a1  
d2g29a\_ d1xs5a\_ d3lswa\_ d2z23a\_ d3w9va\_ d3tcha\_ d1q35a\_ d1z7me1  
d3q27a\_ d1p99a\_ d1ve4a1 d2i6ea1 d4mcoa1 d4n8ya\_ d1eu8a\_ d1zbma1  
d1hsla\_ d1lixca2 d1j1na\_ d1xvya\_ d1y9ua\_ d2z22a1 d1xoca1 d4oera\_  
d1wdna\_ d5f1qa1 d1xt8a1 d1i6aa\_ d4gwoa\_ d4igta1 d1pc3a\_ d4mmpa1  
d1o63a\_ d2cz1a1 d2onsa2 d4mija1 d4ok5a1 d2bmfa1 d2bmfa2 d1yksa1  
d1yksa2 d2qeqa1 d2j1qa1 d1a1va2 d1eh3a\_ d3skpa\_ d1dtza1 d1dtza2  
d1ieja\_ d1jnfa2 d1ce2a1 d1jnfa1 d1b1xa2 d1b1xa1 d1jw1a1 d1jw1a2  
d1ryoa\_ d1h76a1 d1h76a2 d1c4oa1 d2p6ra3 d2p6ra4 d1oywa2 d1oywa3  
d1wrba1 d1w36b2 d1w36b1 d1c4oa2 d3bora\_ d1t6na\_ d2eyqa5 d2eyqa3  
d2eyqa2 d2zu6a2 d1veca\_ d1uaaa1 d1w36d1 d2g9na1 d1z3ix2 d2rb4a\_  
d1hv8a1 d1hv8a2 d1t5ia\_ d1w36c2 d2j0sa2 d2j0sa1 d1fuka\_ d3hjh1  
d1z5za1 d1qdea\_ d1z63a1 d1s2ma2 d1s2ma1 d1wp9a1 d1wp9a2 d1gm5a3  
d3dina4 d3dina3 d1q0ua\_ d1w36c1 d1z3ix1 d1nkta3 d1nkta4 d1uaaa2  
d1w36d2 g1qhh.1 d2fwra2 d2fwra1 d3q3ma\_ d1za0a1 d1mxra\_ d2inca\_  
d1jk0a\_ d2incb\_ d1mhyb\_ d3hf1b\_ d1r2fa\_ d2uw1a\_ d1mhyd\_ d3n37a\_  
d1afra\_ d1oquc\_ d1syya\_ d1mtyd\_ d2o1za\_ d1uzra\_ d1smsa\_ d2fkza\_  
d1zuj1 d1s3qa1 d2fjca1 d1z6om1 d1veia\_ d4dyya\_ d1jiga\_ d3gvya\_  
d2pyba\_ d4cy9a1 d3bvfa1 d1r03a\_ d2cf7a\_ d1nf4a\_ d1zs3a1 d4iwka\_  
d3ka8a\_ d3np0x\_ d1n1qa\_ d1lb3a\_ d4e6ka\_ d1z6oa1 d2fzfa1 d4dyua\_  
d3ge4a\_ d1jgca\_ d4am4a\_ d2z6ma\_ d1ji5a\_ d1vlga\_ d1lkoa1 d1krqa\_  
d3qz3a\_ d1o9ra\_ d2ffxj\_ d1euma\_ d1yv1a1 d2v2pa\_ d1j30a\_ d4di0a\_  
d1dpsa\_ d2cbia2 d1gqia1 d2choa2 d1oewa\_ d2qzxa\_ d2asia\_ d1psoe\_

d1miqa\_ d1smra\_ d2h6ta\_ d1pfza\_ dlizda\_ d3hd8a\_ dlj71a\_ d1dpja\_  
d4aa9a\_ d1t6ex\_ glb5f.1 g11ya.1 glhtr.1 d1qdma2 d1bxoa\_ d1wkra\_  
d1tzsa\_ d1libqa\_ d2qzwa\_ d1um8a\_ d1ixza\_ d1qvra2 d1qvra3 d1qzma\_  
d1sxjc2 d1jr3d2 d2p65a\_ d1l8qa2 d3hu3a3 d1sxjd2 d1njfa\_ d1in4a2  
d1sxja2 d1tuea1 d2ce7a2 d1w5sa2 d1sxjb2 d1d2na\_ d1ny5a2 d1ofha\_  
d2gnoa2 d2a5yb3 d1fnna2 d1u0ja1 d1lv7a\_ d1iqpa2 d2fnaa2 d1ixsb2  
d4gita\_ d1sxje2 d1g41a\_ d1lux8a\_ d4i0va\_ d2bkma\_ d1dlwa\_ d2bmma\_  
d2za0a\_ d2c21a1 d1k8rb\_ d1wgra1 d1wfy1 d1e8ya3 d1wgya1 d1lfda\_  
d2cs4a1 d1wxma1 d2byea1 d3kh0a1 d2byfa1 d1wxaa1 d1e7ua3 d1h4ra3  
d4y18a1 d2a16a3 d1l7ya\_ d1wgda1 d1wgga1 d4q5eb\_ d1wjna1 d1se9a\_  
d3n3kb\_ d1wz0a1 d1we6a1 d2m0xa\_ d2gbka\_ d3rt3b1 d1wh3a1 d1sifa\_  
d2ekek2 d4ii2b1 d4hk2a1 d1m94a\_ d1wgha1 d1ttna1 d1j8ca\_ d1wx8a1  
d3v6cb1 d2ma9b\_ d4i6lb1 d1bt0a\_ d2jvca1 d1iyfa\_ d2k1fa\_ d1wxva1  
d1wf9a1 d1t0ya\_ d2io0b2 d1x1ma1 d2gbma\_ d1zw7a1 d2m17a\_ d1ud7a\_  
d1we7a1 d2lwpa\_ d2gbja\_ d1wjua1 d1v6ea1 d1v86a1 d4eewa\_ d1wiaa1  
d4icva\_ d4gu2a\_ d1wx7a1 d1wy8a1 d4hjka1 d2faza1 d1v5oa1 d2a13a1  
d2cr5a1 d1wj4a1 d1s3sg\_ d4lu0a\_ d3unda1 d3e9aa1 d1vr6a2 d1n8fa\_  
d2qkfa\_ d1d9ea\_ d1o60a\_ d1dszb\_ d1a6ya\_ d3cbba\_ d1ynwa1 d1r4ia\_  
d1hcqa\_ d2hana\_ d2hanb\_ d2enval d1kb4b\_ d2n11b\_ d1l01a\_ d1cita\_  
d2dara2 d2dara1 d1wyha2 d2dloa2 d1rutx4 d1rutx3 d2cuqa2 d1x4la2  
d1x4la1 d1x3ha2 d1x3ha1 d2d8za1 d1x61a2 d1x6aa1 d1x6aa2 d2cora2  
d2cora1 d1v6ga1 d1v6ga2 d2d8za2 d1x64a1 d1x64a2 d1b8ta1 d2co8a1  
d1x63a2 d2dj7a2 d2dj7a1 d2cu8a2 d2cu8a1 d1g47a2 d1g47a1 d1j2oa1  
d1wyha1 d2dloa1 d1wiga1 d1wiga2 d2cupa2 d2cupa3 d1x68a1 d2d8ya2  
d2d8ya1 d1x62a1 d1x68a2 d1x61a1 d1b8ta3 d1b8ta2 d2d8xa2 d2d8xa1  
d1x4ka1 d1x4ka2 d2cuqa1 d1m3va1 d2co8a2 d1j2oa2 d1x63a1 d2cura1  
d2cura2 d1x62a2 d2e3fa\_ d1mm0a\_ d2e3ea\_ d2l1da\_ d2ny8x\_ d2e3ga\_  
d2ny9x\_ d2nz3a\_ d2l1j7a\_ d2m8bb1 d2kyqa\_ d3psma\_ d1jkza\_ d1jxca\_  
d2g11a\_ d1ug1a\_ d4uj0a\_ d1js9c\_ d1f15b\_ d1za7a\_ d1t0za\_ d2i61a\_  
d1t1ta\_ d1sn4a\_ d1kv0a\_ d2l1kba\_ d1npia\_ d1wwna\_ d1pe4a\_ d2kbka\_  
d2li7a\_ d1djta\_ d2kbha\_ d1dq7a\_ d1sega\_ d1omya\_ d1zywa1 d1jzaa\_  
d1bnla\_ d1t61c1 d1iyjb4 d1iyjb5 d1iyjb3 d1o7ia\_ d4ipca1 d1x3ea\_  
d4apva\_ d1jb7a1 d1jb7a2 d1jb7a3 d3kdfa\_ d1ue1b\_ d1wjja1 d3eiva\_  
d1xjva2 d1xjva1 d2ccza2 d1se8a\_ d1l1loc\_ d1jb7b\_ d1qvca\_ d1qzga\_  
d1miau4 d1miau5 d1miau3 d1y14b1 d2nn6i1 d1i94l\_ d2zjra2 d1smxa\_  
d2qamc2 d1hh2p1 d2r7da1 d1rl2a2 d1wfga1 d3bzka4 d1x6oa2 d3a0ja\_  
d2j01d2 d2ja9a1 d4q15a\_ d1hr0w\_ d1luza\_ d2n3sa\_ d2vnud1 d1h95a\_  
d1go3e1 d2nn6h1 d1ne3a\_ d2mo1a\_ d1iz6a2 d1jjga\_ d1e3pa2 d2ix0a3  
d2ix0a2 d2lxja\_ d1ueba3 d1ueba2 d2z0sa1 d1u01a1 d2ix0a1 d2eifa2  
d2je6i1 d3i2za1 d2c35b1 d2ahob2 d1t9ha1 d3i4oa\_ d2qall1 d1jt8a\_  
d2nn6g1 d1g6pa\_ d3cama\_ d1i94q\_ d1c9oa\_ d1d7qa\_ d2ba0a1 d2vnud2  
d2vnud3 d1khia2 d2qalq1 d1wi5a1 d1xta2 d1ny4a\_ d1fvia1 d1ckma1  
d1p16a1 d1x9na2 d2aq2b1 d1ck1a1 d1enfa1 d1i4pa1 d1vloa1 d1et9a1  
d1esfa1 d2g9hd1 d4ohja1 d1klud1 d1bxta1 d1eu3a1 d1ty0a1 d1fnua1

d1ohea1 d1ohea2 d2f4da\_ d1rxda\_ d2hxpa\_ d1xria\_ d1d5ra2 d1fpza\_  
d3ezza\_ d4y2ea\_ d1i9sa\_ d1c1la\_ d41bqa\_ d1a78a\_ d1slta\_ d4no4a\_  
d3zsja\_ d3duia\_ d1is3a\_ d1qmja\_ d1hlca\_ d1tdha3 d1q3ba3 d1ee8a3  
g1qmo.1 g1len.1 d3zyra\_ d1fnya\_ d1n47a\_ g21tn.1 d1avba\_ d3usua\_  
d1dhkb\_ d1f9ka\_ d1ukga\_ d1g8wa\_ d1g9fa\_ d3wcsa\_ d1g7ya\_ g1loe.1  
d1mvqa\_ d1hq1a\_ d1v6ia\_ d1dbna\_ d1qnwa\_ d1fx5a\_ d4l8qa\_ d1ioaa\_  
d3n35a\_ d3ubra\_ d1qo8a1 d1d4ca1 d2k3va\_ d1ft5a\_ d1qdba\_ d1mlqa\_  
d2j7aa\_ d1h21a\_ d1ogyb\_ d4fasa\_ d1jnia\_ d1oaha\_ d1sp3a\_ d3h33a\_  
d1rwja\_ d19hca\_ d1os6a\_ d3bxua\_ d3h4na\_ d1i77a\_ d3caoa\_ d1j0pa\_  
d2ctha\_ d1duwa\_ d2e84a\_ d1hh5a\_ d1gyoa\_ d3h34a\_ d1ccza2 d1vcaa1  
d1dr9a2 d1ic1a1 d2d9qb1 d2nxyb2 d1adqa1 d1fnga1 d1uvqb1 d1zs8a1  
d2vola1 d2vola2 d1mfb12 d2jelh2 d1uwel2 d3qq4b1 d1kjob\_ d1k5na1  
d1osph2 d4odh12 d1ow0a1 d1ow0a2 d1bfob2 d3l9ra2 d3jtt1 d2fath2  
d4elkb2 d1fn4b2 d2xfxb\_ d1pg7x2 d1cqka\_ d4k71b2 d1lk2a1 d1eapb2  
d4lfhg2 d1i4fa1 d2nw2a2 d1kfah2 d1mhca1 d1h3ua1 d1wejh2 d1h0db2  
d1a5fh2 d1kcvh2 d1mjuh2 d1qqda1 d1kcrh2 d1k8ia1 d3huja2 d2nnab1  
d1nfd2 d3mffb2 d1s9va1 d1lk3h2 d1q0x12 d1fv1b1 d1neza1 d4rfeb2  
d1r3ha1 d1a6tb2 d1kjva1 d1pz5b2 d1onqa1 d2bc4a2 d1de4a1 d1k8da1  
d1tcra2 d1dn0b2 d1nfd2 d2xwtb2 d1bfoa2 d1mexh2 d1iakb1 d1ypzf2  
d4f7ea2 d1q7212 d2fbjh2 d1fe8h2 d1clzh2 d1fngb1 d1uvqa1 d1vgka1  
d1c16a1 d4j12a2 d4x99b2 d1igtb3 d1je6a1 d1q72h2 d1nldh2 d1teth2  
d2hmic2 d1i1ca2 d1i1ca1 d1k8ib1 d1q0yh2 d1kfa12 d3frua1 d1pg7w2  
d1u58a1 d1igyb4 d1igyb3 d1hyrc1 d1klub1 d1deeb2 d1c12b2 d2bc4b2  
d2ig2h2 d1kcv12 d3wn5b1 d1lk2b\_ d1lk312 d1mjul2 d1sm3h2 d1q0xh2  
d1zvsal d1ydpal d1u8ib2 d1ypze2 d1kcuh2 d1op9a\_ d1y01a1 d1etzb1  
d1egj11 d2gsib1 d1nj9a1 d4jfh1 d1aqk11 d1t2ja\_ d1lo4h1 d1zvyal  
d3v4v11 d4enec1 d1kxtb\_ d5e8ea1 d2pxya\_ d4weud\_ d1xiwc\_ d2esvd1  
d1qznh\_ d1ogae1 d1f4xh1 d4n1hb\_ d3ezjb1 d3mlw11 d1kfah1 d1etza1  
d1b4jh1 d3cfic\_ d4w68a\_ d2arja1 d1ek3a\_ d2ok011 d1vera\_ d1uwgh1  
d1blnb1 d1fpth1 d1rzga1 d2giya1 d4m3kb1 d1nc2a1 d2nyyd1 d1ncna\_  
d1fbih1 d5dxwa\_ d4fqqa1 d1dqdh1 d1jfq11 d1kelh1 d1faih1 d1frgl1  
d1fig11 d4m6n11 d1fo0a\_ d4hxb11 d3b5ga\_ d3quyd1 d2h9gb1 d1i8kb\_  
d2dd8h1 d2ck0h1 d1eaja\_ d4w6wb1 d2a6ib3 d1t66d1 d2e27h\_ d1ob1b1  
d1f11b1 d2v7na1 d1ad0a1 d2xt1b1 d1pskh1 d4i13b1 d2op411 d1a0q11  
d1uwe11 d1za3a1 d1ncb11 d4uu9a\_ d1bm3h1 d1cloh1 d1nqba2 d1cf8h1  
d4y5va\_ d1mhph1 d5anma1 d4cdgc1 d4ldeb\_ d1y01b1 d2pcpb1 d1z3g11  
d1dfb11 d1fh5h1 d3g5xa1 d1tzib1 d4dn311 d3zhka1 d2b1hh1 d2uylal  
d1f3dh1 d1nj9b1 d2agjh1 d2h1p11 d1q72h1 d8fabb1 d1ndmb1 d1rjca1  
d4u6hb1 d3upca\_ d2fbj11 d1osph1 d1tvda\_ d2cjh\_ d4fhbd1 d1bd2d1  
d1rz7h1 d3nn8a\_ d1blnal d1knoa1 d1nfdal d2bmkb1 d1dq11\_ d1igyb1  
d1igf11 d12e8h1 d3utza1 d1nc2b1 d1rihh1 d4mwfb1 d4jvpa1 d1mieh1  
d1rhfa1 d1fgn11 d1sbsh1 d1lp9e1 d1dn0a1 d4lqf11 d1iaih1 d1kgcd1  
d1mh5b1 d1gp011 d2g60h3 d1f8t11 d2jixd1 d4grwh\_ d1fo0b\_ d1bfob1  
d1axsa1 d1u9ka\_ d1nmbh\_ d1h8na1 d1h8na2 d1jguh1 d4eural d3sdy11

d35c8h1 d1w72l1 d1mvub\_ d1i9rh1 d1ob1a1 d4wenb\_ dlyeeh1 d3ietc1  
d1f58h1 d1ad0b1 d1mqkl\_ d1nbvh1 d4b50a\_ d3r8bb\_ d1baf1l d1mamh1  
d4rgne1 d2gsgb\_ d35c8l1 d1bafh1 d1ai1h1 d2pcpa1 d2fath1 d2x1pa\_  
d1orsb1 d1libgl1 d1shma\_ d1a2yb\_ d1u0qa\_ d2coqa\_ d1hilb1 d1qfwi\_  
d1jv5b\_ d1fn4b1 d5e0qa\_ d1nsnh1 d1plgl1 d4ocxl1 d1kb5h1 d1rzfh1  
d1pg7x1 d2fx7h1 d2oi9c\_ d1l7il1 d3eyva1 d1d5il1 d4ffyl\_ d1tetl1  
d1a6wh\_ d1ac6a\_ d3dvfa\_ d1nfde1 d1mimh1 d1ri8a1 d1jhlh\_ d3dura\_  
d1fskb1 d1f97a1 d3so3b1 d2ak4d1 d1lp9f1 d4z7wf1 d1l7th1 d4y5ya\_  
d4x7ec1 d1emth1 d1ikfl1 d1nlbh1 d4utal1 d1bjma1 d1eapb1 d1u6ah1  
d2dtgd1 d1kj2b\_ d1xeda1 d1c1eh1 d1fgvh\_ d2bnub1 d2fb4h1 d2dtgb1  
d1ktrh\_ d1jpth1 d1qkzl1 d4hepg\_ d2atpb1 d1flrh1 d2hrpl1 d1mvfa\_  
d1iaim1 d3k80a1 d2jb5h1 d3zkxc\_ d4grwe\_ d1it9h1 d1rhhb1 d3w9ec\_  
d1e4wh1 d1sy6h1 d2j6eh1 d3qxta\_ d1jglh1 d1p7ka1 d1tzhb1 d4n8pa1  
d1gaf1l d2jelh1 d1wioa2 d4i0cc1 d1cicb1 d1lmka2 d1lmka1 d1iqwh1  
d1orqb1 d1ejoh1 d1jnlh1 d4zgl1\_ d43c9b\_ d1ggb1l d1wejh1 d3q6fa1  
d1f3dj1 d3c6la1 d1bqlh1 d3p9wb\_ d1a3r1l d1h0db1 d2uzil\_ d1eo8l1  
d1qfwl\_ d1n7ml1 d1igja1 d1c5ch1 d2a9mh\_ d1rmfh1 d1fjlb1 d4heme\_  
d1ccza1 d1a5fh1 d1ogad1 d1dlfh\_ d1qa9b\_ d1vgel1 d3qskb\_ d1sjxa\_  
d4ozfg1 d1sq2n\_ d1qd0a\_ d1kcvh1 d1c5db1 d3qcull d3bn9d1 d1mjuh1  
d4y8dc\_ d7fabh1 d3dvgb1 d1lo0l1 d1a6tb1 d1gigh1 d1kcrh1 d2hwzl1  
d1yjdcl d3clfl1 d4krna\_ d1dl7l\_ d1e6ol1 d1mexh1 d3r0ma\_ d4kkna\_  
d1fns1l d1oaqh\_ d1rzia1 d1ucbh1 d1ncwl1 d4b41a\_ d1nfdfl d2mpah1  
d2d7tl1 d4grwf\_ d4b5ea\_ d1lk3h1 d3u79a\_ d4u3xa\_ d1ghfl1 d1bvkb\_  
d1mcww1 d1b88a\_ d1jrrh1 d32c2b1 d4wemb\_ d1dsfh\_ d1op3h1 d1ce1l1  
d1iqda1 d1qoka1 d1qoka2 d1qfuh1 d2crya1 d1ay1h1 d1oaql\_ d3ab0b\_  
d1rur1l d1t4kb1 d1bz7b1 d1n0xh1 d1for1l d1ucbl1 d4w6yb\_ d43c9a\_  
d2aabl1 d1tzia1 d4n1ca\_ d1k6qh1 d3g9ab\_ d4tvsa1 d1ligmh\_ d1pz5b1  
d3dx9a1 d3wxwh\_ d1nakh1 d1kcul1 d3eaka\_ d4qlra1 d1cr9l1 d1d9ka\_  
d1f4xl1 d1deea1 d2i27n2 d1c12a1 d2orbl1 d1j8hd1 d1mcph1 d1c5da1  
d1kenh1 d1bd2e1 d1h5ba\_ d4x7fc1 d3upaa\_ d1t3fa1 d1indh1 d2dtgc1  
d4hc1l1 d1zv5a1 d4wgvb\_ d1uwgl1 d4f37k1 d1aqkh1 d1vesa\_ d3zkqd\_  
d1fpt1l d1lo4l1 d1knob1 d3rrqa\_ d1ct8b1 d4orz\_ d1mlbb1 d4hgkc1  
d1dqdl1 d1bogb1 d4ozhe1 d1dr9a1 d1i7za1 d1dn0b1 d1kell1 d1rzib1  
d1ypzfl d1wtla\_ d1hkfa\_ d1fail1 d1figh1 d2vyre\_ d1sjva\_ d1ohqa\_  
d1bfoa1 d1pkqb1 d1mjul1 d1b4jl1 d1nsnl1 d2arjb1 d1p4bh\_ d4aj0a\_  
d3nn8b\_ d2rcja1 d1f2xk\_ d4v1dd\_ d1adqh1 d2eksa\_ d4k3ga\_ d1jfqh1  
d1uweh1 d1frgh1 d4gftb\_ d1uz8b1 d4n1ea\_ d1bm3l1 d1clol1 d3mcka1  
d2vq1a1 d1ae6h1 d4aq1b1 d1uj3b1 d1nbqa1 d1fh5l1 d2ck0l1 d2ywza\_  
d1q72l1 d4nxbx\_ d1hila1 d4hzlb1 d2j88l1 d1zmya1 d1cd0a\_ d1a4ka1  
d1pskl1 d1a0qh1 d4krmb\_ d1ncbh1 d2fbjh1 d1j8he1 d1i3ua\_ d1cf8l1  
d1fe8h1 d2p1ya1 d1eeqa\_ d2x89a\_ d1o10a\_ d2r0lh1 d1ub5a1 d1dfbh1  
d3eyvb1 d4jdvb1 d4p2cg\_ d2gsia1 d2agjl1 d1u3ha1 d2h1ph1 d1rihl1  
d1fskc1 d1boga1 d2a77l1 d1ospl1 d1qfoa\_ d3dwta\_ d2fx7l1 d1rz7l1  
d3stba1 d1pkqa1 d1b6da1 d1dzba2 d1dzba1 d1kj2a\_ d4l1ha\_ d1rzgb1



d1dq1h\_ d12e811 d1mie11 d1jmaa\_ d1sbs11 d1fgnh1 d1f5811 d1mqkh\_  
d1ndgb1 d3qeg11 d1ia11 d2aw2a1 d1tqbc1 d3fo2a1 d4dkaa\_ d1f8th1  
d2g6011 d2ywy\_ d1uj3a1 d1yc7a\_ d3bd3a\_ d4w6xb1 d1nmb1\_ d1i8ka\_  
d1rj1b1 d1ypze1 d1p7kb1 d1kxqe\_ d1gpoh1 d2z4qa1 d1w72h1 d1i9r11  
d4qgya1 d4xt1c\_ d2qqnh1 d1cica1 d3c08h1 d2cd0a\_ d2bdnh1 d1hnga1  
d1mam11 d1nldh1 d1cr9h1 d4lcih1 d3bkyh1 d3qg711 d1ai111 d1kxvc\_  
d4iosd\_ d1l7ih1 d2x1qa\_ d1ub6b1 d3k74b\_ d1ibgh1 d1teth1 d1igya1  
d1hxma1 d2x6ma\_ d2e71a\_ d5e03a\_ d1qfwm\_ d2r0kh1 d1igjb1 d1rurh1  
d1plgh1 d1mj8h1 d1yuhb1 d3fmg11 d1rzfl1 d1emt11 d1ad9b1 d1igtb1  
d1n1b11 d1d5ih1 d3k7ua\_ d4ffyh\_ d1bwwa\_ d3dvga1 d1a6ta1 d1fgvl\_  
d4qxgl1 d1mim11 d1jh11\_ d2hffb1 d2hh011 d1qkzh1 d1l7t11 d1afvh1  
d1iaii1 d2cjuh\_ d1um5h1 d2ghwb2 d2ghwb1 d1kgce1 d2fgwh1 d1ikfh1  
d1dvfd\_ d2i24n1 d2xtjb\_ d1za3b1 d2yc1a\_ d2hh0h1 d2x1oa\_ d1bvka\_  
d1rj1a1 d5e7ba1 d1igta1 d1il1b1 d2fb411 d1mvua\_ d1jpt11 d32c2a1  
d1fvca\_ d1iqdb1 d2hrph1 d2p4ab\_ d4qo1a\_ d1p2cb1 d1wt5c\_ d1t4ka1  
d5c1mb\_ d1it911 d1bz7a1 d1b2wh1 d1e4w11 d1jn111 d1yedb1 d1za6b1  
d3u7aa\_ d1igfh1 d3gnm11 d1orsa1 d1wejl1 d1a2ya\_ d1hxmb1 d1gafh1  
d2j4wh1 d1pz5a1 d1j05a\_ d1a3rh1 d4fq111 d1qfwh\_ d1eo8h1 d1n7mh1  
d4s11a\_ d1kegh1 d5da4a\_ d1iqw11 d3whxb1 d1vgeh1 d1deeb1 d1c12b1  
d1t2q11 d1ad9a1 d3gsnb1 d3b2uc1 d1ggbh1 d1t3fb1 d1nak11 d4ocmc\_  
d1lila1 d2v7hb3 d2esve1 d1mcoh1 d2qr0b1 d2q3aa\_ d1ct8a1 d1kcr11  
d2pxyb\_ d2uzih\_ d5c31d\_ d3durb\_ d1c5c11 d2ak4e1 d1d17h\_ d1xiwd\_  
d1mlba1 d1rmfl1 d1i7zb1 d1dlfl\_ d2xa3a\_ d5bq7b1 d1dqqb1 d3h4211  
d1egjh1 d1kcv11 d1fe811 d2j6e11 d1f3rb2 d11k311 d1sm3h1 d1q0xh1  
d1ghfh1 d7fab11 d1igch1 d1lo0h1 d4idla\_ d5c2b1\_ d1jrh11 d1i11a1  
d3zhda1 d4kfzc\_ d1b0wa\_ d1e6oh1 d1mex11 d4krpb\_ d1fnsh1 d1ncwh1  
d4hgma\_ d4eigb1 d4rzca\_ d2mpa11 d4y5xa\_ d5en2b1 d3lrga1 d4ej1c1  
d1rhha1 d1j05b\_ d1forh1 d1q9wb1 d2wzpd\_ d2aq2a1 d1h0da1 d3revb1  
d2ij0c1 d1tzha1 d4m7j11 d1k6q11 d3b9kc1 d1igml\_ d3qeau1 d1dsfl\_  
d1ce1h1 d1kcu11 d1zvha1 d1zvoa1 d1tqbb1 d1ay111 d2qscl1 d2cgrh1  
d1n10h1 d1ken11 d3eo0a1 d4n9ob1 d1n0x11 d3k1kc\_ d2cqva1 d1fhga\_  
d2k1ma\_ d2d12a1 d1biha3 d1biha1 d1biha4 d3qp3a1 d1g1ca\_ d1gxea\_  
d1cvsc2 d1cvsc1 d1xmwa2 d1m4ka2 d2otpa2 d1biha2 d1rhfa2 d2fcba2  
d2fcba1 d1wwbx\_ d1gsma2 d1epfa1 d1epfa2 d2dava1 d1waaa\_ d1f97a2  
d1x44a1 d1vcaa2 d1fnla2 d1fnla1 d3b5ha2 d3h8na2 d3h8na1 d1jbja1  
d1jbja2 d1pd6a\_ d1f2qa2 d1f2qa1 d3cx2a\_ d1nbqa2 d3b5ha1 d1n26a1  
d1xiwb\_ d1xaua\_ d1fltx\_ d2ifga1 d1olla1 d1olla2 d1cs6a4 d1cs6a3  
d1cs6a2 d1cs6a1 d2gw5a2 d1sy6a1 d1xiwa\_ d1ucta2 d1ucta1 d1ry7b2  
d1gl4b\_ d1qz1a3 d1olza1 d2c9aa1 d1wwca\_ d1c4qa\_ d1prtcl d2wv6d\_  
d1prtfl\_ d1ltrd\_ d4l63b1 d1r4pb\_ d1prtd\_ d1tl0f\_ d2bosa\_ d1prtb1  
d3chbd\_

**Family-60 (c.37.1.1)**

**Positive dataset contains 17 protein sequences.**

d3lv8a\_ d3tvta2 d3cm0a\_ d3h86a\_ d1t0hb\_ d2h92a\_ d3kb2a1 d2c95a1

dlyj5a2 dlvvyva2 d2grja1 dly63a\_ d3iija1 dlvvua2 d4e22a\_ dlq3ta\_  
dlteva\_

**Negative dataset contains 3651 protein sequences.**

d1m32a\_ d1libja\_ d1c7na\_ d1liuga\_ d4q75a\_ d2bkwa1 d1t3ia\_ dlqz9a\_  
d1jf9a\_ d1eg5a\_ d1p3wa\_ d3kgwa\_ d1c11a\_ d2ctza1 d1vjoa\_ d2rfva\_  
d1gc0a\_ d1cs1a\_ d1d2fa\_ d2ch1a1 d1qgna\_ d1pffa\_ d1elua\_ d1u08a\_  
d11c5a\_ d1b5pa\_ d2ay1a\_ d1bw0a\_ d3pd6a\_ d7aata\_ d2csta\_ d1j32a\_  
d1fg7a\_ d4wlha\_ d1o4sa\_ d1v2da\_ d1gdea\_ d1m6sa\_ d1v72a1 d1svva\_  
d1wsta1 d2f8ja2 d11k9a\_ d1vp4a1 d1xi9a1 d2gb3a1 d1yaaa\_ d3rcha\_  
d3k40a\_ d1pmma\_ d1xkta1 d2hfka\_ d1jmkc\_ d5d3ka\_ d2cfba1 d1dfoa\_  
d1o69a\_ d1bj4a\_ d3k28a\_ d2bwpa\_ d3lg0a\_ d2fnua\_ d3ou5a\_ d1z7da1  
d1b9ha\_ d4msoa\_ d1bs0a\_ d1s0aa\_ d1sffa\_ d3tqxa\_ d1mdoa\_ d3qboa\_  
d3pgya\_ d1bjna\_ d2dkja\_ d1ejia\_ d1vefa1 d4wxga\_ d3bs8a\_ d3gbxa1  
d1w23a\_ d1h6ua2 d1sefa\_ d1sfna\_ d1rc6a\_ d2bnma2 d1f56a\_ d1bypa\_  
d1azca\_ d1ws8a\_ d3u25a\_ d1cuoa\_ d1id2a\_ d1rkra\_ d2iaac\_ d4dp1x\_  
d1nwpa\_ d2gima\_ d2i7sa\_ d1qhqa\_ d3ehbb1 d1fftb1 d1gyca3 d1hfua2  
d1kbva1 d1kbva2 d1sdda1 d1sdda2 d1gyca1 d1gyca2 d1mzya1 d2bw4a1  
d1aoza1 d1aoza3 d1aoza2 d1kyaa2 d1kyaa3 d1kyaa1 d1mzya2 d4e9sa1  
d1sddb1 d1sddb2 d1hfua1 d1hfua3 d1oela2 d1oela1 d1v10a2 d1v10a3  
d1v10a1 d1rypd\_ d1irua\_ d1rypc\_ d3unfk\_ d1rypa\_ d1j2pa\_ d1irui\_  
d1j2qh\_ d3unfh\_ d1m4ya\_ d1rypb\_ d1irul\_ d1irug\_ d1iru2\_ d1q5rh\_  
d1rypg\_ d1g3ka\_ d1iruf\_ d1q5qa\_ d1e94a\_ d1irub\_ d1ryph\_ d3ty6a\_  
d1iruj\_ d1iruk\_ d1rype\_ d1irud\_ d1irue\_ d3mi01\_ d1rypf\_ d1iruh\_  
d2z3ba\_ d1iruc\_ d3mka2\_ d1irul\_ d3sxwa1 d1j3qa\_ d4luka\_ d1a3qa1  
d1iknc\_ d3brda1 d1p7hl1 d1oy3c\_ d1imhc1 d1gjia1 d1zk9a1 d2cxka1  
d2bema\_ d1pama1 d1ea9c1 d1qhoa1 d2fhfa2 d2fhfa1 d1k3ia1 d1j0ha1  
d1cxl1a1 d2bhua1 d1edqa1 d1f1sa2 d1ut9a2 d1gvia1 d1txka1 d1zx5a1  
d1mqta\_ d1d4m3\_ d1fmd3\_ d2mev1\_ g1aym.1 d1ev13\_ d4q4w1\_ d1r1a3\_  
d2x5ia\_ d1rhi1\_ g1r1a.1 g1d4m.1 g1rhi.1 d1b35b\_ d1loopa\_ d1tme1\_  
d4iv1a\_ g1pvc.1 g1fpn.1 d1fpn1\_ d4gb31\_ d1d4m1\_ d1fmd1\_ d1ev11\_  
d2wzr3\_ g1cov.1 d1qqp3\_ g1fmd.1 d2x5ic\_ d1rhi3\_ g1loop.1 d1hxs1\_  
g1hxs.1 d1fpn3\_ d1bev1\_ g2mev.1 d1eah3\_ d1aym1\_ d1pvc3\_ d1qqp1\_  
d1zba3\_ d1h8ta\_ d3vbhc\_ g1b35.1 g1bev.1 d1hxs3\_ g1ev1.1 d1bev3\_  
g1tmf.1 d1tmf1\_ d2mev3\_ g1eah.1 g1h8t.1 d1eah1\_ d4q4w3\_ d1r1a1\_  
d1aym3\_ d1pvc1\_ d1zba1\_ d1h8tc\_ d1loopc\_ d1tme3\_ g1qqp.1 d4iv1c\_  
g1tme.1 d1ds6b\_ d1fstb\_ d1ju8a\_ d4alac\_ d1pjwa\_ d1rera1 d1s6na\_  
d3uzqb\_ d1tafa\_ d1bh9b\_ d1tafb\_ d1jfib\_ d1h3ob\_ d2byka1 d1n1ja\_  
d4g92b\_ d1bh9a\_ d1jfia\_ d1h3oa\_ d2bykb1 d1n1jb\_ d1eixa\_ d3exra\_  
d2ffca1 d2fdsa1 d3n3ma1 d2czda\_ d2yyua\_ d1vqta1 d1dbta\_ d3ldva1  
d2bjca1 d2hsga1 d1qpza1 d1efaa1 d1ydw2 d2nvwa2 d1h6da2 d1zh8a2  
d1xeaa2 d1tlta2 d1r0ka3 d1vkoa2 d1vm6a2 d3qvsa2 d1gr0a2 d1p1ja2  
d2ovga\_ d1sq8a\_ d1rzsa\_ d3kz3a\_ d3orca\_ d3gpdg2 d2q49a2 d1hdgo2  
d2g17a2 d2cvoa2 d2czca1 d3pwka2 d1obfo2 d1i32a2 d1zyao2 d2pkqo2  
d1b7go2 d2hjsa2 d1cf2o2 d1vkna2 d1nvmb2 d1ux8a\_ d1dlya\_ d4i0va\_

d2bkma\_ d1dlwa\_ d2bmma\_ d2msya\_ d2djoa1 d2r5za\_ d1au7a1 d1f43a\_  
d2lmda1 d1akhb\_ d1s7ea1 d3nara\_ d1zq3p1 d2craa1 d1mija\_ d4uuta\_  
d3a01a\_ d1x58a1 d3rkqa1 d3cmya1 d2cqxa1 d2da6a1 d1e3oc1 d1fjla\_  
d1mh3a1 d1ig7a\_ d1x41a1 d1wh7a1 d1gt0c1 d2mw8a\_ d1lfup\_ d1x2ma1  
d1b72a\_ d1wi3a1 d1jgga\_ d1wjha1 d1x2na1 d1nmnc\_ d2cuea1 d3k2aa\_  
d2hosa\_ d2jwta2 d1pufa\_ d1octc1 d2hi3a\_ d4j19a\_ d3lnqa\_ d1wh5a1  
d1b8ib\_ d1hcra\_ d1tc3c\_ d1gdta1 d1u78a2 d2iu5a1 d1zk8a1 d2g7sa1  
d2fd5a1 d2np5a1 d1z0xa1 d2id6a1 d2d6ya1 d2i10a1 d1vi0a1 d2oi8a1  
d3c07a1 d2ns7a1 d2fq4a1 d2yvea1 d1t33a1 d2o7ta1 d1rkta1 d2np3b1  
d2g7ga1 d2gena1 d2fbqa1 d2g71a1 d2gfna1 d2g3ba1 d2jj7a1 d2hyja1  
d1sgma1 d1ui5a1 d2hkua1 d2id3a1 d4jyka1 d1kb0a1 d1k8ka2 d1k8ka1  
d3uleb1 d3i33a2 d3i33a1 d1bupa1 d1dkgd2 d1dkgd1 d4ci6a2 d1jcfa1  
d4a2ba2 d2fxua1 d1yaga2 d1yaga1 d4cbua2 d1bupa2 d1iqca2 d1iqca1  
d1eb7a2 d1nmla2 d1nmla1 d1qksa1 d3h1jd1 d1hroa\_ d4gedb\_ d3zooa\_  
d1mz4a\_ d1gu2a\_ d1f1fa\_ d1dvva\_ d1c6ra\_ d1c75a\_ d1e29a\_ d1gdva\_  
d1cnoa\_ d1h32b\_ d1co6a\_ d2bh4x\_ d2aiua\_ d5cytr\_ d1jdl\_ d1i8oa\_  
d2zboa\_ d3dmia\_ d1ls9a\_ d1wvec\_ d2yk3a\_ d3ph2b\_ d1dw0a\_ d5aura\_  
d1ql3a\_ d1qn2a\_ d1f1ca\_ d2nqya\_ d1h4ga\_ d1hixa\_ d1oa2a\_ d1olra\_  
d3b7ma\_ d4h7ma1 d3wp3a\_ d2vgda\_ d1igoa\_ d3zsea\_ d2nlra\_ d3wx5a\_  
d1oa3a\_ d1pvxa\_ d1f5ja\_ d1oa4a\_ d1ks5a\_ d4ixla1 d1evsa\_ d1cnt1\_  
d1pvhb\_ d1z7ca\_ d1huwa\_ d1bgea\_ d1rhga\_ d1f6fa\_ d1f45b\_ d1i1rb\_  
d1axia\_ d1etea\_ d3tgxb\_ d1scfa\_ d2z3qa1 d3qb1a\_ d1m48a\_ d4nkqb\_  
d1eera\_ d1v7mv\_ d5e4ea\_ d2o27a\_ d3b5ka\_ d2psma1 d4zf7a\_ d3uf5a\_  
d4dnxa2 d1m8pa2 d1g8fa2 d1jhda2 d1x6va2 d2b71a\_ d3rbaa\_ d2qtra\_  
d1nupa\_ d3l92a\_ d1f9aa\_ d1qjca\_ d2h29a\_ d1vlha\_ d1lod6a\_ d1lw7a1  
d1mrza2 d4ruka\_ d3sw2a\_ d1moxc\_ d1dx5i3 d1edmb\_ d1autl2 d1autl1  
d1dva11 d1szba2 d1kigl\_ d2y5fl\_ d1ijqa2 d1gk5a\_ d1g1sa2 d1nt0a3  
d1xdtr\_ d1lmja2 d1lmja1 d1nzia2 d2wphe\_ d1klil\_ d1pfxl2 d1pfxl1  
d1p9ja\_ d1g1ta2 d1f7ea\_ d4yzub\_ d2mgpa1 d1b9wa2 d2mgpa2 d1ob1c1  
d1ob1c2 d1n1ia2 d1n1ia1 d2npra2 d2npra1 d1m1xb4 d1qx2a\_ d1ig5a\_  
d2y5ia\_ d1qlsa\_ d1psra\_ d3n22a\_ d2egda\_ d4ggfc\_ d2wcea\_ d2luca\_  
d4aqia\_ d3nsia\_ d2lp3a\_ d1j55a\_ d1a4pa\_ d1k8ua\_ d1nsha\_ d1pvaa\_  
d3fs7a\_ d2pvba\_ d1ttxa\_ d1rwya\_ d2kyfa\_ d1rk9a\_ d1a75a\_ d1lexra\_  
d1tiza1 d1nyaa\_ d1g8ia\_ d1ggwa\_ d1wdcc\_ d3fwba\_ d1ggza\_ d2o5ga\_  
d1ctaa\_ d1m45a\_ d3i5gc\_ d1s18a\_ d1fpwa\_ d2scpa\_ d2roaa\_ d4aqra\_  
d3pn7b\_ d1br1b\_ d2mysb\_ d1s6ca\_ d1bjfa\_ d2obha\_ d1jfka\_ d1jf0a\_  
d1qv0a\_ d1lkja\_ d2mlfc\_ d2m97a\_ d2d8na\_ d4by5a\_ d1jbaa\_ d4nqga\_  
d1wdcb\_ d2mysc\_ d1j7qa\_ d1s6ia\_ d1uhka2 d1r2ua\_ d1dtla\_ d3kf9a\_  
d3pn7c\_ d1fi6a\_ d1c07a\_ d5d67d\_ d1tuza\_ d1h8ba\_ d1eg3a2 d2zkmx1  
d1snla\_ d1gjya\_ d1y1xa\_ d1hqva\_ d1dvia\_ d1df0a1 d1qxp2 d4usla\_  
d1k94a\_ d1wkya2 d1uuqa\_ d3wh9a\_ d4m1ra\_ d1xyza\_ d4xuya\_ d2je8a5  
d4bf7a1 d3cuia\_ d1ur4a\_ d1qw9a2 d1odza\_ d2vzsa5 d1bqca\_ d2x2ya1  
d1hjqa\_ d1qnra\_ d4y7ea1 d1vjza\_ d4k68a\_ d2v3ga\_ d4hpga\_ d1nofa2  
d1nq6a\_ d1h4pa\_ d1aq0a\_ d3ziza\_ d4bs0a\_ d1ecea\_ d1h1na\_ d1ta3b\_

d1w91a2 d1i1wa\_ d1uhva2 d1us3a2 d1legza\_ d7a3ha\_ d1tvna1 d3nyda1  
d1ghsa\_ d2cyga1 d4xv0a\_ d2c8na2 d1w32a\_ d3emca\_ d1v6ya1 d1foba\_  
d2uwfa1 d2fgla\_ d3niya1 d2c0ha1 d1rh9a1 d1yq2a5 d1szna2 d1fa2a\_  
d1pama4 d5do8a1 d1hx0a2 d2fhfa5 d1qhoa4 d1avaa2 d1m53a2 d4m8ua1  
d2gjpa2 d1lwaha2 d4howa1 d1ktba2 d1j0ha3 d3vm5a1 d2x1ia\_ d1wzaa2  
d1uasa2 d2diea1 d1mxga2 d1ht6a2 d1eswa\_ d1iv8a2 d5cpsa\_ d1ud2a2  
d1zjaa1 d3gbea1 d1kwga2 d1wdpa\_ d1gcya2 d1g5aa2 d1hvxa2 d3dhp2a2  
d2bhua3 d4do4a1 d3qgva1 d1e43a2 d1g94a2 d2d3na2 d1gjwa2 d1gvia3  
d1x1na1 d1r7aa2 d1tz7a1 d3wdpp1 d3wq5a\_ d1gnxa\_ d4gxpa\_ d4hz8a\_  
d1e4mm\_ d3aiua\_ d1wcga1 d1qvba\_ d3ahxa\_ d1v02a\_ d2dgaa\_ d1vffa1  
d1qoxa\_ d4ha4a\_ d1mixa2 d1e5wa2 d1isna2 d2a16b2 d1x14a1 d1n9pa\_  
d3vsqa\_ d2gixa1 d2v76a\_ d1wj1a1 d1qqga2 d1qqga1 d1ntva\_ d1n3ha\_  
d4dbba\_ d3f0wa1 d1p3ra\_ d1wgua1 d2cy4a1 d3hqca\_ d1wvha1 d1xr0b1  
d1wgqa1 d1v89a1 d2coda1 d1zc3b\_ d1wg7a1 d1u5ea1 d1v61a1 d2coca1  
d2ys1a1 d1v5pa1 d1nty2a d1wjma1 d1wi1a1 d1u29a\_ d1xx0a1 d1unqa\_  
d2zkmx3 d1fhoa\_ d1v88a1 d2adza1 d1x1fa1 d1p6sa\_ d2coaa1 d1btka\_  
d1v5ma1 d1faoa\_ d2x18a\_ d1dyna\_ d1x1ga1 d4kaxb\_ d2j59m1 d1kilb2  
d1xcga2 d1txda2 d1u5da1 d1w1ha\_ d1upqa\_ d1v5ua1 d1foea2 d2fj1a1  
d1eaza\_ d2dfka2 d2cofa1 d1kz7a2 d1h6ua1 d91dta1 d2ewda3 d1up7a1  
d2dfda1 d1s6ya1 d1vjta1 d7mdha1 d1hyea1 d1t2da1 d1ojsa3 d1b8pa1  
d1ldna1 d1hyha1 d1civa1 d2a92a1 d1ez4a1 d1i0za1 d1y6ja1 d1gv0a1  
d1ur5a1 d1l1da1 d1obba1 d1npya1 d3t4ea2 d1a4ia1 d1o0sa1 d2hk9a2  
d2egga2 d1b26a1 d1bvua1 d1gq2a1 d1c1da1 d1leha1 d1gtma1 d1euzal  
d3dona2 d1edza1 d1gpja2 d1vi2a1 d1p77a1 d1nyta1 d1b0aa1 d1vl6a1  
d1v91a1 d1etob\_ d1umqa\_ d1g2ha\_ d1kola2 d1f8fa2 d1qora2 d1jqba2  
d1vj0a2 d1cdoa2 d1gu7a2 d1d1ta2 d1xa0a2 d2dm6a2 d1jvba2 d1rjwa2  
d1llua2 d1h2ba2 d1tt7a2 d1piwa2 d1o89a2 d1iz0a2 d1e3ja2 d1yb5a2  
d1vj1a2 d1e3ia2 d3gpdg1 d1vc2a1 d2nvwal d1u8fo1 d1ydwal d1hdgo1  
d2g17a1 d1cf2o1 d2czca2 d1r0ka2 d1obfo1 d2cvoa1 d1ebfa1 d1h6da1  
d1i32a1 d1zh8a1 d2q49a1 d1qkia1 d1j5pa4 d3pzra1 d1xeea1 d1vkoa1  
d1vm6a3 d3qvsa1 d2pkqo1 d1b7go1 d1gr0a1 d1lc0a1 d1j0xo1 d3pwka1  
d2hjsa1 d1zyao1 d1vkna1 d1tlta1 d1nymb1 d3sjua\_ d3ojfa1 d1xu9a1  
d2jjya1 d1n7ha\_ d1y1pa1 d1h5qa\_ d1jtva\_ d4fs3a\_ d2bkaa1 d1gy8a\_  
d2c5aa1 d1ulsa\_ d1ooea\_ d2b69a1 d1y5ma1 d1spxa\_ d1a1ea\_ d1bxka\_  
d1ydea1 d1gega\_ d1hdoa\_ d1o5ia\_ d1e6ua\_ d1snya1 d2rhca\_ d3zv4a\_  
d5ceja\_ d2d1ya1 d1fjha\_ d3w8ea\_ d2fmua1 d1x1ta\_ d1rpna\_ d3ay7a1  
d1k2wa\_ d1eq2a\_ d2hrba1 d3ruaa\_ d2ew8a1 d4hwka\_ d1xgka\_ d2bd0a1  
d1yo6a1 d2a35a1 d2ntva\_ d1vl8a\_ d1hdca\_ d4bkua\_ d2ag5a1 d2q45a\_  
d1nffa\_ d4iy1a\_ d1zbqa1 d1kewa\_ d1ek6a\_ d1ja9a\_ d2q46a2 d1iy8a\_  
d1cyda\_ d2ptga\_ d1hxha\_ d1uzma1 d3lyla\_ d4m89a\_ d3wyea\_ d2b11a1  
d1w6ua\_ d1sb8a\_ d2q2va\_ d4nr0a\_ d1e6wa\_ d2gasa\_ d3oiga1 d2bgka1  
d1mxha\_ d1vl0a1 d1rkxa\_ d1r6da\_ d1wmaa1 d1e7wa\_ d2c07a1 d1xkqa\_  
d3tzha\_ d1g0oa\_ d3lz6a\_ d1qyca\_ d1ledoa\_ d1oc2a\_ d1t2aa\_ d1zema1  
d2xoxa\_ d1z45a2 d1geea\_ d1p33a\_ d3lt0a\_ d4e6pa\_ d2wyua\_ d1db3a\_

d4q9na\_ d1xhla\_ d4o1ma\_ d1fmca\_ d2uvda\_ d2gdza1 dluaya\_ d2z1ma\_  
d2o23a2 d2fr1a2 d2fr1a1 d1qsga\_ d1qyda\_ d4zjua\_ d2a4ka1 d1ybla\_  
d1wvga1 d1yxma1 d3f4ba\_ d1mg5a\_ d1xg5a1 d1r55a1 d3gboa\_ d1atla\_  
d1kufa\_ d4q1la\_ d1quaa\_ d1yp1a\_ d1wnia\_ d2gfoa1 d1vjva\_ d2ayna1  
d3nhea\_ d4ekfa\_ d2ckga\_ d1th0a\_ d2bkra\_ d1xd3a\_ d3ifwa\_ d3i2ka1  
d1mpxa2 d3ioqa\_ d1fh0a\_ d1o0ea\_ d1khqa\_ d1m6da\_ d2cb5a\_ d1cs8a\_  
g8pch.1 d1s4va\_ d2pnsa\_ d1vsna1 d1mira\_ d1iwda\_ d2oula\_ d7pcka\_  
d3bwka\_ d3bcna\_ d2p86a\_ d1pvja\_ d1pcia\_ d1gece\_ d1deua\_ d4bs6a\_  
d1xkga1 d1cqda\_ d1jqpa2 d2c0ya\_ d2bdza\_ d3p5ua\_ d2o36a\_ d1k9xa\_  
d1zoya1 d1d4ca2 d1chua2 d1jnra2 d1kf6a2 d2jk6a2 d2jk6a1 d1fecal  
d1fecal d1lpfa1 d1lpfa2 d1xhca1 d1xhca2 d1dxla2 d1dxla1 d1gera2  
d1m6ia2 d1onfa1 d1onfa2 d3lada2 d3lada1 d1w4xa1 d1w4xa2 d1gesa2  
d1mo9a1 d1xdia1 d1fl2a1 d1fcda1 d1fcda2 d1h6va2 d1h6va1 d1mo9a2  
d1gv4a2 d1gv4a1 d2gv8a2 d2gv8a1 d1aoga1 d1aoga2 d1hyua1 d1ebda1  
d1ebda2 d3dk9a1 d1q1ra2 d1q1ra1 d1gesa1 d1zbfa1 d2z1ha\_ d2etja1  
d3qioa1 d1j11a\_ d2e4la\_ d1j12a\_ d21sna1 d1uaxa\_ d2yv0x\_ d1mu2a1  
d1ekea\_ d1i39a\_ d1o94a2 d1lqta1 d1cjca1 d1pn0a1 d1reoal d1ju2a1  
d2f5va1 d3c96a1 d2gmha1 d1pj5a2 d1gpea1 d1o5wa1 d1n4wa1 d1k0ia1  
d2dw4a2 d2ivda1 d1seza1 d2voua1 d1s5ja1 d2hbja2 d2igia\_ d1wlja\_  
d1qhta1 d4dlea1 d1tgoa1 d2f96a1 d3tr8a1 d3mxma\_ d1q8ia1 d1y97a1  
d1w0ha\_ d1kfsa1 d2py5a1 d1noya\_ d1d5aa1 d1yt3a3 d2guia\_ d3mwpal  
d4kbla\_ d1liv0a\_ d2d5ra1 d1js9c\_ d1f15b\_ d1za7a\_ d1laja\_ d2csua1  
d3q9ub\_ d2yv1a1 d3q9na\_ d2d59a\_ d1oi7a1 d2yv2a1 d1leuca1 d1y81a1  
d1v58a1 d1t3ba1 d4ilfa2 d4npba2 d3nvva1 d1krha3 d2h88b1 d1n62a2  
d1t3qa2 d1kf6b2 d1zoyb1 d1jq4a\_ d1dggja2 d1rm6c2 d1jmx2 d1jmx1  
d1pbya1 d1r7ha\_ d1faaa\_ d1wika1 d1xfla\_ d1ttza1 d2f51a1 d1ti3a\_  
d1nhoa\_ d1sena\_ d2i4aa\_ d1ep7a\_ d1zmaa1 d1fo5a\_ d3lefa1 d3diea1  
d2yana1 d1z6na1 d1oaza\_ d3zywa1 d4aj8a\_ d1nm3a1 d4fiwa\_ d1wmja\_  
d4hs1a1 d1iloa\_ d1xwaa1 d1wjka1 d2vmla\_ d1fb6a\_ d1gh2a\_ d1h75a\_  
d1nw2a\_ d1kx5b\_ d3a6na\_ d4m6ba2 d2nqbd\_ d3wkjd\_ d2yfwe\_ d4h9na\_  
d5bnxa\_ d1kx5c\_ d3r45a\_ d1eqzb\_ d4jjnb\_ d1f66c\_ d1eqza\_ d4wnnb\_  
d1kx5a\_ d1u35c1 d1id3a\_ d2nqbc\_ d1kx5d\_ d1f1ea\_ d1b67a\_ d2b5ea2  
d2b5ea3 d2b5ea1 d2b5ea4 d2kp1a1 d2kp2a1 d1hyua4 d1j08a1 d1j08a2  
d1pd212 d1nhya2 d2a2ra2 d1k0dd2 d1f2ea2 d1gsua2 d1f3ba2 d2fhea2  
d2pvqa1 d1tw9a2 d1oyja2 d1e6ba2 d1k0ma2 d3ik7a1 d4is0a1 d1r5aa2  
d1jlva2 d1m0ua2 d3gtub2 d1z9ha2 d1okta2 d1axda2 d2gsra2 d1tu7a2  
d1k3ya2 d1zagma1 d1b48a2 d1gnwa2 d1gwca2 d2gsta2 d1glqa2 d1oe8a2  
d1pn9a2 d1v2aa2 d1fw1a2 d1duga2 g1f8v.1 d1novc\_ d2bbvc\_ d1txga2  
d3f47a1 d2pv7a2 d1xc2a3 d2ahra2 d4xiya1 d2f1ka2 d1pgja2 d1i36a2  
d1np3a2 d1lj8a4 d1teaa3 d1qmga2 d2i76a2 d2g5ca2 d1wdka3 d1dlja2  
d3cuma3 d1qqya\_ d1gd6a\_ d1f6ra\_ d1livma\_ d2gv0a\_ d1iiza\_ d2z2fa\_  
d1j8xa\_ d1ghla\_ d1b9oa\_ d1741a\_ d1691a\_ d2o4wa\_ d1p37a\_ d1k28a3  
d1xjta1 d1jtma\_ d2f2qa\_ d4e97a1 d1iyka2 d1iyka1 d1rxta1 d1iica2  
d2pjsa1 d1k1la\_ d2i7ra1 d1ecsa\_ d1xqaa1 d5cj3a1 d1jifa\_ d2p7oa\_

d1r9ca\_ d1nkia\_ d1mpya2 d1kw3b2 d1kw3b1 d4ghga1 d1tfza1 d3isqa1  
d3isqa2 d1sqia1 d1sqia2 d1lkda2 d1lkda1 d1mpya1 d1cjxa2 d1cjxa1  
d1sp9b2 d1t47a1 d1t47a2 d1f1ua2 d1sp8a1 d1sp8a2 d1s5ja2 d1qhta2  
d4dlea2 d1tgoa2 d3py8a2 d1q8ia2 d2py5a2 d1d5aa2 d1qsta\_ d2beia1  
d4m3sa\_ d1u6ma1 d1ygha\_ d1yk3a1 d3dr6a\_ d1xmta\_ d1z4ea1 d2ge3a1  
d1bo4a\_ d2fiaa1 d2jdca1 d1y9wa1 d3to7a\_ d1wwza1 d2fl4a1 d2ozua1  
d2b5ga\_ d2cy2a1 d2p0wa\_ d1cm0a\_ d4pswa\_ d1yrea1 d1yr0a1 d1m4ia\_  
d2gana1 d1yvka1 d2g3aa1 d1y7ra1 d2euia1 d1q2ya\_ d2fsra1 d1xeba\_  
d2ae6a1 d1cjwa\_ d1qsma\_ d2aj6a1 d1y9ka1 d1i12a\_ d1vkca\_ d2atra1  
d1n71a\_ d2d4pa1 d2fiwa1 d2fe7a1 d1tiqa1 d2ou2a\_ d1yx0a1 d2fcka1  
d1p0ha\_ d2j8ma\_ d2pq8a\_ d1z4ra1 d1s3za1 d1ufha\_ d2hqya1 d2hqya2  
d1lrza2 d1ne9a1 d1lrza3 d1xvqa1 d1pn0a2 d3hy2a\_ d2cvba1 d1o8xa\_  
d1lu4a\_ d1we0a1 d2bmxal d2a4va1 d1psqa\_ d1xiya1 d1q98a\_ d1n8ja\_  
d1zofa1 d2ggta\_ d3tjja\_ d4je1a1 d1o73a\_ d3s9fa\_ d2zcta\_ d1qmva\_  
d1jfua\_ d2b1ka\_ d5dvba1 d2b5xa1 d2v2ga\_ d1st9a\_ d3tb2a\_ d4llra\_  
d4fh8a1 d1knga\_ d2h30a\_ d1i5ga\_ d2z9sa\_ d2f8aa1 d1tp9a1 d2b7ka\_  
d1nm3a2 d3hvva\_ d2wfca1 d4kcea\_ d1xvwa1 d4gqca1 d3qpm\_ d4k1fa\_  
d1zzoal d1gp1a\_ d1prxa\_ d4od7a1 d1z6ma1 d4mcua1 d4dvca1 d1r4wa\_  
d3l9sa\_ d1un2a\_ d3rppa\_ d1zsqal d2phla2 d2phla1 d1fxza2 d1fxza1  
d1lrha\_ d1uija1 g1dgw.1 d2v09a\_ d1uika2 d1uika1 d1e88a1 d1l6ja5  
d1l6ja4 d1eaka4 d1eaka3 d1l6ja3 d1h8pa2 d1w52x1 d2ppla1 d1hpla2  
d1lpbb2 d2oxea1 d1bu8a2 d1rp1a2 d1ys1x\_ d4hs9a\_ d1ispa\_ d1ex9a\_  
d1ku0a\_ d3qmma\_ d1lgya\_ d4l3wa\_ d1llfa\_ d1gz7a\_ d1lukca\_ d1bvsa3  
d1ixra2 d1svpa\_ d1mbma\_ d3su6a1 d4agka\_ d1vcpa\_ d1q31a\_ g1n11.1  
d3e90b\_ d1ep5a\_ d3u1jb\_ d1xwdc1 d3kj4a\_ d1w8aa\_ d2ifga3 d1p9ag\_  
d1xkua\_ d1g12a\_ d1m4la\_ d2bk7a\_ d3fjua\_ d1z5ra1 d1kwma1 d1uwya2  
d1jqga1 d2c1ca1 d1dtda\_ d1h8la2 d2tbvc\_ d1c8nc\_ d1x36a\_ d1smvc\_  
d1ng0c\_ d4sbvc\_ d1lopoa\_ d1f2nc\_ d1cixa\_ d1y29a\_ d1v7fa\_ d2jtba\_  
d1d1ha\_ d1g9pa\_ d1lupa\_ d1qk7a\_ d1mb6a\_ d2a2va\_ d1niya\_ d1hvwa\_  
d2mpqa\_ d1ie6a\_ d1kqha\_ d1la4a\_ d2mxoa1 d1d10a\_ d1koza\_ d1qk6a\_  
d1emxa\_ d1lqra\_ d1c6wa\_ g1apy.1 d3ljqa\_ d3lgia\_ d3i77a\_ d2z9ia2  
d4nsva\_ d1lcya2 d4jcna\_ d1agja\_ d1os8a\_ d1hpga\_ d1p3ca\_ d1qtfa\_  
d1ny721 d1ny722 d1a6ca3 d1a6ca1 d1pgl22 d1pgl21 d1pgl11 d1ny711  
d1jgta2 d1ofda3 d1ea0a3 d1q15a2 d1ct9a2 d1ao0a2 d1te5a\_ d1y14b1  
d2nn6i1 d1i94l\_ d2zjra2 d1smxa\_ d2qamc2 d1hh2p1 d2r7da1 d1rl2a2  
d1wfqa1 d3bzka4 d1x6oa2 d3a0ja\_ d2j01d2 d2ja9a1 d4q15a\_ d1luza\_  
d2n3sa\_ d2vnud1 d1h95a\_ d1go3e1 d2nn6h1 d1ne3a\_ d2mo1a\_ d1liz6a2  
d1jjga\_ d1e3pa2 d2ix0a3 d2ix0a2 d2lxja\_ d1ueba3 d1ueba2 d2z0sa1  
d1u0la1 d2ix0a1 d2eifa2 d2je6i1 d3i2za1 d2c35b1 d2ahob2 d1t9ha1  
d3i4oa\_ d2qall1 d1jt8a\_ d2nn6g1 d1g6pa\_ d3cama\_ d1i94q\_ d1c9oa\_  
d1d7qa\_ d2ba0a1 d2vnud2 d2vnud3 d1khia2 d2qalq1 d1wi5a1 d1xtda2  
d1ny4a\_ d3ia2a\_ d1a88a\_ d4dgqa1 d1zoia\_ d1rw1a\_ d1z3ea1 d3l78a\_  
d4lt9a1 d3tc7a1 d3hoja\_ d1i4na\_ d3vnda\_ d3nl8a1 d1geqa\_ d3naval  
d1v5xa\_ d4a2ra1 d3tc6a1 d1ujpa\_ d4ijba\_ d1xcfa\_ d1vc4a\_ d1rd5a\_

d1qopa\_ d3b5va\_ d2r80b\_ d1cqxa1 d1cg5a\_ d1gcvb\_ d3boma\_ d2h8fb\_  
d2raoa\_ d3bj1a\_ d4hrrb\_ d2r50a\_ d3d1kb\_ d2aalb1 d3zhwa\_ d3hf4b\_  
d3gdja\_ d1jebb\_ d3bj1b\_ d1x9fb\_ d1wmub\_ d1gcva\_ d3bcqb\_ d3d4xb\_  
d1gvha1 d2dc3a\_ d3hf4a\_ d4yu3a\_ d3k8ba\_ d1qpwb\_ d2r80a\_ d3bcqa\_  
d1v4wa\_ d3wtgb\_ d1j17a\_ d4esaa\_ d1a9we\_ d3d1ab\_ d1fsla\_ d4h21a\_  
d1v4wb\_ d1mwca\_ d1vhba\_ d1jeba\_ d1spgb\_ d1h97a\_ d1q1fa\_ d1tu9a1  
d3d1aa\_ d1hdsb\_ d3hyub\_ d2zfb\_ d3fs4a\_ d1oj6a\_ d1shrb\_ d4h21b\_  
d4yu3b\_ d1spga\_ d3hrwa\_ d3qqra\_ d3at5a\_ d4wchd\_ d3hyua\_ d1cg5b\_  
d1uc3a\_ d1hbra\_ d2raob\_ d1outb\_ d4esab\_ d3gdjb\_ d3qqqa\_ d1x9fc\_  
d3vrf\_ d1litha\_ d3mkba\_ d3d4xa\_ d3mjpa\_ d1j16a\_ d3fh9a\_ d1outa\_  
d2dc3b\_ d1lit2a\_ d3eoka\_ d3g46a\_ d1qpwa\_ d3vrfb\_ d1ch4a\_ d1x9fd\_  
d1hdsa\_ d2zfa\_ d3mkbb\_ d1or4a\_ d3wtga\_ d1a4fa\_ d3fh9b\_ d3bomb\_  
d3cy5a\_ d3at5b\_ d1x9fa\_ d2oifa\_ d4lmb\_ d1cpcb\_ d3v57a\_ d1kn1a\_  
d1cpca\_ d4f0ta\_ d2vjha\_ d4po5b\_ d1eyxa\_ d1alla\_ d4f0tb\_ d1b33b\_  
d1b8db\_ d4h0mb\_ d1b33a\_ d2vjhb\_ d4lm6b\_ d2vmlb\_ d2vjta\_ d3dbja\_  
d2vmla\_ d2vjtb\_ d4f0ub\_ d1f99b\_ d4rmpa1 d1liaa\_ d1eyxb\_ d2uulb\_  
d4lmsb\_ d4f0ua\_ d2bv8a\_ d1f99a\_ d2bv8b\_ d2c71b\_ d3dbjb\_ d4rmpb1  
d1b8da\_ d4h0ma\_ d3v57b\_ d1kn1b\_ d1liab\_ d2uula\_ d2j96a\_ d1pfsa\_  
d2a1ka\_ d1je5a\_ g1gxs.1 g1wht.1 d1azwa\_ d1mtza\_ d1hlga\_ d2xqfa\_  
d1ea5a\_ d1f6wa\_ d1dx4a\_ d1qe3a\_ d1k4ya\_ d4qwwa\_ d2ha2a\_ d1offa\_  
d1fr\_ d3wcqa\_ d1e9ma\_ d1l5pa\_ d1wria\_ d1i7ha\_ d3av8a\_ d1czpa\_  
d1rfka\_ d3p1ma1 d3b2ga\_ d2bt6a2 d4iuaa3 d4bvva\_ d5hpga\_ d3k65a\_  
d1ki0a3 d1ki0a2 d1ki0a1 d1a0ha1 d1pmla\_ d3sp8a3 d2feba1 d3ulra1  
d1g9ka2 d1kapp2 d1f74a\_ d3l21a\_ d2e1da\_ d1to3a1 d1w3ia\_ d1sfla\_  
d1n7ka\_ d1vcva1 d4imea\_ d1wa3a\_ d2ocza1 d1f2ja\_ d3m16a\_ d2yxga\_  
d1ub3a\_ d3a5fa\_ d1fbaa\_ d1l6wa\_ d1xfba1 d1wx0a1 d1vpxa1 d1ojxa\_  
d1mxsa\_ d2a4aa1 d1xkya1 d3cq0a1 d3s1xa\_ d1f05a\_ d1fdja\_ d3cpra1  
d4d2ja\_ d1cg2a1 d1yloa2 d1y7ea2 d1y0ya3 d1lfwa1 d1vixa1 d1fnoa4  
d1vhoa2 d1ysja1 d1vhea2 d1z21a1 d2fvga2 d1vgya1 d2grea2 d1xmba1  
g1q71.1 d1rtqa\_ d3rp2a\_ g1lucy.1 d1fuja\_ d2zchp\_ d3w94a\_ d1si5h\_  
d1l06a\_ g2pka.1 d1cgha\_ d1kigh\_ d1a5ia\_ d3s9ba\_ d1hj8a\_ d1ao5a\_  
d2anya\_ d1q3xa1 d1gvza\_ d1azza\_ d4gsoa\_ d2f91a1 d1iaua\_ d1gdna\_  
d1eufa\_ g1fiw.1 d1eq9a\_ d4nfea\_ d2rdla\_ d1spja\_ d1elva1 d1a7sa\_  
d1ekbb\_ d1pfxc\_ d1yc0a\_ d2aiqa\_ g1fiz.1 d1fi8a\_ d4k60a\_ d4dgja\_  
d1mzaa\_ d1op0a\_ d3tjva\_ d1pytd\_ d1sgfg\_ g1gg6.1 d2eeka\_ g1rtf.1  
d1a0ja\_ d3g01a\_ d1pytc\_ d4e7na\_ d1ddja\_ d1z8ga1 d2hlca\_ d1npma\_  
g1jou.1 d1sgfa\_ d1autc\_ g2hnt.1 g1kdq.1 d1orfa\_ d3s69a\_ d4crga\_  
d1fxya\_ d1bqya\_ d2ftba\_ d1pmpa\_ d2rcqa1 d1fdqa\_ d4lkpa\_ d1sa8a\_  
d1vyfa\_ d1lpja\_ d3vg7a1 d4azqa1 d1o8va\_ d5bvqa\_ d2qo4a\_ d1opba\_  
d1yiva1 d1o1va\_ d4bvma1 d4tkba\_ d4i3ba\_ d1bwya\_ d1ftpa\_ d1ggla\_  
d4gkca\_ d1cbia\_ d3p6da1 d1kqwa\_ d2a0aa1 d1dzka\_ d4tlja\_ d2a2ua\_  
d4wfva\_ d3tlda\_ d4iaxa\_ d3zq3a\_ d2nnda\_ d1i4ua\_ d1kxoa\_ d1bbpa\_  
d1kt7a\_ d1exsa\_ d3s26a1 d1lf7a\_ d1qfta\_ d4gh7a\_ d1z24a1 d1qabe\_  
d1xkia\_ d1ew3a\_ d3bx7a\_ d4iawa1 d1n0sa\_ d1gkab\_ d3kzaa\_ d2k23a\_

d2l9ca1 d2joza1 d1gm6a\_ d3kffa\_ d3saoa1 d1e5pa\_ d1yupa1 d1iiua\_  
d2i49a\_ d1nnfa\_ d1xvxa\_ d1lursa\_ d1h3da1 d1iuda\_ d4m1va1 d1twya\_  
d3e13x\_ d2nxoa1 d4pfua\_ d3ttma\_ d1elja\_ d2qmwa1 d1us5a\_ d1y3na1  
d1jeta\_ d1uqwa\_ d4f19a1 d2esna2 d3thia\_ d3fasa1 d2uyeb\_ d2xwva1  
d1r9la\_ d2fyia1 d1pb7a\_ d2ozza1 d1sw5a\_ d1nh8a1 d1vr5a1 d2g29a\_  
d1xs5a\_ d3lswa\_ d2z23a\_ d3w9va\_ d3tcha\_ d1q35a\_ d1z7me1 d3q27a\_  
d1p99a\_ d1ve4a1 d2i6ea1 d4mcoa1 d4n8ya\_ d1eu8a\_ d1zba1 d1hsla\_  
d1ixca2 d1j1na\_ d1xvya\_ d1y9ua\_ d2z22a1 d1xoca1 d4oera\_ d1wdna\_  
d5f1qa1 d1xt8a1 d1i6aa\_ d4gwoa\_ d4igta1 d1pc3a\_ d4mmpa1 d1o63a\_  
d2czla1 d2onsa2 d4mija1 d1eh3a\_ d3skpa\_ d1dtza1 d1dtza2 d1ieja\_  
d1jnfa2 d1ce2a1 d1jnfal d1b1xa2 d1jw1a1 d1jw1a2 d1ryoa\_ d1h76a1  
d1h76a2 d3q3ma\_ d1za0a1 d1mxra\_ d2inca\_ d1jk0a\_ d2incb\_ d1mhyb\_  
d3hflb\_ d1r2fa\_ d2uw1a\_ d1mhyd\_ d3n37a\_ d1afra\_ d1oquc\_ d1syya\_  
d1mtyd\_ d2o1za\_ d1uzra\_ d1smsa\_ d2fkza\_ d1zujal d1s3qa1 d2fjca1  
d1z6om1 d1veia\_ d4dyya\_ d1jiga\_ d3gvya\_ d2pyba\_ d4cy9a1 d3bvfa1  
d1r03a\_ d2cf7a\_ d1nf4a\_ d1zs3a1 d4iwka\_ d3ka8a\_ d3np0x\_ d1n1qa\_  
d1lb3a\_ d4e6ka\_ d1z6oa1 d2fzfa1 d4dyua\_ d3ge4a\_ d1jgca\_ d4am4a\_  
d2z6ma\_ d1ji5a\_ d1vlga\_ d1lkoa1 d1krqa\_ d3qz3a\_ d1o9ra\_ d2ffxj\_  
d1euma\_ d1yv1a1 d2v2pa\_ d1j30a\_ d4di0a\_ d1dpsa\_ d1oewa\_ d2qzxa\_  
d2asia\_ d1psoe\_ d1smra\_ d2h6ta\_ d1pfza\_ d1izda\_ d3hd8a\_ d1j71a\_  
d1dpja\_ d4aa9a\_ d1t6ex\_ g1b5f.1 g1lya.1 g1htr.1 d1qdma2 d1bxoa\_  
d1wkra\_ d1tzsa\_ d1libqa\_ d2qzwa\_ d1bdqa\_ d3ggta\_ d3ixoa\_ d1mrxa\_  
d2haha\_ d1tw7a\_ d4njsa\_ d1sgua\_ d2p3da\_ d1nsoa\_ d3d3ta\_ d2rkfa\_  
d1c6ya\_ d2rspa\_ d3ogpa\_ d3ekwa\_ d2o4na\_ d2j9ja\_ d1baia\_ d3ggua\_  
d3lzua\_ d4npua\_ d4j55a\_ d2r8na\_ d2fxda\_ d2p3ca\_ d4dqa\_ d3ttpa\_  
d3t3ca\_ d2p3aa\_ d2hc0a\_ d2fdda\_ d3mwsa\_ d4yl8a1 d2a16a3 d1wgda1  
d1wggal d4q5eb\_ d1wjna1 d1se9a\_ d3n3kb\_ d1wz0a1 d1we6a1 d2m0xa\_  
d2gbka\_ d3rt3b1 d1wh3a1 d1sifa\_ d2ekek2 d4ii2b1 d4hk2a1 d1c3ta\_  
d1m94a\_ d1wgha1 d1ttna1 d1j8ca\_ d1wx8a1 d3v6cb1 d2ma9b\_ d4i6lb1  
d1bt0a\_ d2jvca1 d1iyfa\_ d2k1fa\_ d1wxva1 d1wf9a1 d1t0ya\_ d2io0b2  
d1x1ma1 d2gbma\_ d1zw7a1 d2m17a\_ d1ud7a\_ d1we7a1 d2lwpal d2gbja\_  
d1wjua1 d1v6ea1 d1v86a1 d4eewa\_ d1wiaa1 d4icva\_ d4gu2a\_ d1wx7a1  
d1wy8a1 d4hjka1 d2faza1 d1v5oa1 d3ruib\_ d1eo6a\_ d3waob\_ d2r2qa1  
d3m95a\_ d3wana\_ d2a13a1 d2cr5a1 d1wj4a1 d1g66a\_ d5ajha1 d1dszb\_  
d1a6ya\_ d3cbba\_ d1ynwa1 d1r4ia\_ d1hcqa\_ d2hana\_ d2hanb\_ d2enval  
d1kb4b\_ d2n1lb\_ d1lola\_ d1cita\_ d1adqa1 d1fnga1 d1uvqb1 d1zs8a1  
d2vola1 d2vola2 d1mfb12 d2jelh2 d1uwe12 d3qq4b1 d1kjvb\_ d1k5na1  
d1osph2 d4odh12 d1ow0a1 d1ow0a2 d1bfob2 d3l9ra2 d3jtt1 d2fath2  
d4elkb2 d1fn4b2 d2xfxb\_ d1pg7x2 d1cqka\_ d4k71b2 d1lk2a1 d1eapb2  
d4lfhg2 d1i4fa1 d2nw2a2 d1kfah2 d1mhca1 d1h3ua1 d1wejh2 d1h0db2  
d1a5fh2 d1kcvh2 d1mjuh2 d1qqda1 d1kcrh2 d1k8ia1 d3huja2 d2nnab1  
d1nfd2 d3mffb2 d1s9va1 d1lk3h2 d1q0x12 d1fv1b1 d1neza1 d4rfeb2  
d1r3ha1 d1a6tb2 d1kjva1 d1pz5b2 d1onqa1 d2bc4a2 d1de4a1 d1k8da1  
d1tcra2 d1dn0b2 d1nfd2 d2xwtb2 d1bfoa2 d1mexh2 d1iakb1 d1ypzf2



d4f7ea2 d1q72l2 d2fbjh2 d1fe8h2 d1clzh2 d1fnqb1 d1uvqa1 d1vgka1  
d1c16a1 d4j12a2 d4x99b2 d1igtb3 d1je6a1 d1q72h2 d1nldh2 d1teth2  
d2hmic2 d1i1ca2 d1i1ca1 d1k8ib1 d1q0yh2 d1kfa12 d3frua1 d1pg7w2  
d1u58a1 d1igyb4 d1igyb3 d1hyrc1 d1klub1 d1deeb2 d1c12b2 d2bc4b2  
d1kcv12 d3wn5b1 d11k2b\_ d11k3l2 d1mju12 d1sm3h2 d1q0xh2 d1zvsa1  
d1ydpal d1u8ib2 d1ypze2 d1kcu2 d21j7a\_ d1n4na\_ d2m8bb1 d2kyqa\_  
d3psma\_ d1jkza\_ d1jxca\_ d2g11a\_ d4uj0a\_ d2k4ua\_ d1hp2a\_ d2lu9a\_  
d1baha\_ d2meoa1 d1wm7a\_ d1hlya\_ d1n8ma\_ d1jlza\_ d1wpda\_ d1c55a\_  
d1pvza\_ d1wt7a\_ d1rjia\_ d1wz5a\_ d1m2sa\_ d1pjva\_ d1qkya\_ d2ktca1  
d1wmta\_ d1du9a\_ d1j5ja\_ d1r1ga\_ d1e3oc2 d1ic8a2 d1t0za\_ d2i61a\_  
d1t1ta\_ d1sn4a\_ d1kv0a\_ d21kba\_ d1npia\_ d1wwna\_ d1pe4a\_ d2kbka\_  
d21i7a\_ d1djta\_ d2kbha\_ d1dq7a\_ d1sega\_ d1omya\_ d1zywa1 d1jzaa\_  
d2jca\_ d1n9wa1 d1bbua1 d1e1oa1 d1b8aa1 d1l0wa1 d3a74a1 d1eova1  
d1t61c1 d1iyjb4 d1iyjb5 d1iyjb3 d1o7ia\_ d4ipca1 d1x3ea\_ d4apva\_  
d1jb7a1 d1jb7a2 d1jb7a3 d3kdfa\_ d1ue1b\_ d1wjja1 d3eiva\_ d1xjva2  
d1xjva1 d2ccza2 d1se8a\_ d1l1oc\_ d1jb7b\_ d1qvca\_ d3ulla\_ d1qzga\_  
d1m1ua4 d1m1ua5 d1m1ua3 d3g48a1 d1gd7a\_ d1mkha\_ d1jjcb3 d1pyba\_  
d3ubub\_ d1egia\_ d1v7pa\_ d1tdqb\_ d3ubua\_ d1c3ab\_ d1h8ua\_ d3bx4b\_  
d1t8ca1 d1sb2a1 d1qdda\_ d2ziba1 d3cada\_ d1byfa\_ d1j34b\_ d1jwia\_  
d1jzna\_ d1c3aa\_ d1oz7b\_ d1wmza\_ d3bdwb\_ d1hq8a\_ d1fifa1 d1dv8a\_  
d3hupa\_ d1wk1a1 d1umra\_ d2afpa\_ d3bx4a\_ d1gz2a\_ d1sl6a\_ d1v7pb\_  
d3g8ka\_ d1ixxa\_ d1j34a\_ d1jwib\_ d1g1sa1 d1y17a1 d1ja3a\_ d1fvub\_  
d3bdwa\_ d1sb2b1 d1fvua\_ d1umrc\_ d1oz7a\_ d4m17a\_ d3cfwa1 d1ypqa1  
d1g1ta1 d3fd4a\_ d3l9jc\_ d4dn8a1 d1v41b\_ d1rd11\_ d2msba\_ d1prtc2  
d1prtb2 d3zxha\_ d1cgl\_ d1rm8a\_ d1eaka2 d1hy7a\_ d2jsda\_ d1cxva\_  
d1hv5a\_ d1i76a\_ d1rpma\_ d2shpa1 d1yfoa\_ d1l8ka\_ d2ooqa1 d1g4us2  
d1p15a\_ d1lara2 d1lara1 d1wcha\_ d2fh7a2 d2fh7a1 d1ohea1 d1ohea2  
d2f4da\_ d1rxda\_ d2hxpa\_ d1xria\_ d1fpza\_ d3ezza\_ d4y2ea\_ d1i9sa\_  
d1k9ua\_ d2opoa\_ d3azya\_ d3wvja\_ d1upsa1 d1ajoa\_ d2hyka\_ d1ajka\_  
d2vy0a\_ d1o4ya\_ d3o5sa\_ d3d6ea\_ d3atga\_ d1dypa\_ d1umza\_ d3i4ia\_  
d1c11a\_ d41bqa\_ d1a78a\_ d1slta\_ d4no4a\_ d3zsja\_ d3duia\_ d1g86a\_  
d1is3a\_ d1qmja\_ d1hlca\_ g1qmo.1 g1len.1 d3zyra\_ d1fnya\_ d1n47a\_  
g21tn.1 d1avba\_ d3usua\_ d1dhkb\_ d1f9ka\_ d1ukga\_ d1g8wa\_ d1g9fa\_  
d1wbfa\_ d3wcsa\_ d1g7ya\_ g1loe.1 d1mvqa\_ d1hqla\_ d1dbna\_ d1qnwa\_  
d1fx5a\_ d418qa\_ d1ioaa\_ d3n35a\_ d3ubra\_ d1qo8a1 d1d4ca1 d2k3va\_  
d1ft5a\_ d1qdba\_ d2j7aa\_ d1h21a\_ d1ogyb\_ d4fasa\_ d1jnia\_ d1oaha\_  
d1sp3a\_ d3h33a\_ d1rwja\_ d19hca\_ d1os6a\_ d3bxua\_ d3h4na\_ d1i77a\_  
d3caoa\_ d1j0pa\_ d2ctha\_ d1duwa\_ d1ofwa\_ d2e84a\_ d1hh5a\_ d1gyoa\_  
d3h34a\_ d1wioa4 d1ccza2 d1vcaa1 d1ic1a1 d2d9qb1 d2nxyb2 d2dara2  
d2dara1 d1wyha2 d2dloa2 d1rutx4 d1rutx3 d2cuqa2 d1x41a2 d1x41a1  
d1x3ha2 d1x3ha1 d2d8za1 d1x61a2 d1x6aa1 d1x6aa2 d2cora2 d2cora1  
d1v6ga1 d1v6ga2 d2d8za2 d1x64a1 d1x64a2 d1b8ta1 d2co8a1 d1x63a2  
d2dj7a2 d2dj7a1 d2cu8a2 d2cu8a1 d1g47a2 d1g47a1 d1j2oa1 d1wyha1  
d2dloa1 d1wiga1 d1wiga2 d2cupa2 d2cupa3 d1x68a1 d2d8ya2 d2d8ya1

d1m3va2 d1x62a1 d1x68a2 d1x61a1 d1b8ta3 d1b8ta2 d2d8xa2 d2d8xa1  
d1x4ka1 d1x4ka2 d2cuqa1 d1m3va1 d2co8a2 d1j2oa2 d1x63a1 d2cura1  
d2cura2 d1x62a2 d1op9a\_ d1y01a1 d1letzb1 d1egjl1 d2gsib1 d1nj9a1  
d4jfhdl d1aqkl1 d1t2ja\_ d1lo4h1 d1zvyal d3v4vl1 d4enec1 d1kxtb\_  
d5e8ea1 d2pxya\_ d4weud\_ d1xiwc\_ d2esvd1 d1qznh\_ d1ogae1 d1f4xh1  
d4n1hb\_ d3ezjb1 d3mlwl1 d1kfah1 d1letza1 d1b4jh1 d3cfic\_ d4w68a\_  
d2arja1 d1ek3a\_ d2ok011 d1vera\_ d1luwgh1 d1blnb1 d1fpth1 d1rzga1  
d2giya1 d4m3kb1 d1nc2a1 d2nyyd1 d1ncna\_ d1fbih1 d5dxwa\_ d4fqqa1  
d1dqdh1 d1jfq11 d1kelh1 d1faih1 d1frgl1 d4m6n11 d1fo0a\_ d4hxb11  
d3b5ga\_ d3quyd1 d2h9gb1 d1i8kb\_ d2dd8h1 d2ck0h1 d1eaja\_ d4w6wb1  
d2a6ib3 d1t66d1 d2e27h\_ d1ob1b1 d1f11b1 d2v7na1 d1ad0a1 d2xt1b1  
d1pskh1 d4i13b1 d2op411 d1a0q11 d1uwell1 d1za3a1 d1ncb11 d4uu9a\_  
d1bm3h1 d1cloh1 d1nqba2 d1cf8h1 d4y5va\_ d1mhph1 d5anma1 d4cdgc1  
d4ldeb\_ d1y01b1 d2pcpb1 d1z3gl1 d1dfb11 d1fh5h1 d3g5xa1 d1tzib1  
d4dn311 d3zhka1 d2b1hh1 d2uy1a1 d1f3dh1 d1nj9b1 d2agjh1 d2h1p11  
d1q72h1 d8fabbl d1ndmb1 d1rjca1 d4u6hb1 d3upca\_ d2fbj11 d1osph1  
d1tvda\_ d2cjev\_ d4fhbd1 d1bd2d1 d1rz7h1 d3nn8a\_ d1blna1 d1knoa1  
d1nfdal d2bmkb1 d1dq11\_ d1igyb1 d1igfl1 d12e8h1 d3utza1 d1nc2b1  
d1rihh1 d4mwfb1 d4jvpa1 d1mieh1 d1rhfa1 d1fgn11 d1sbsh1 d1lp9e1  
d1dn0a1 d4lqfl1 d1iaih1 d1kgcd1 d1mh5b1 d1gpol1 d2g60h3 d1f8t11  
d2jixd1 d4grwh\_ d1fo0b\_ d1bfob1 d1axsa1 d1u9ka\_ d1nmbh\_ d1h8na1  
d1h8na2 d1jguh1 d4eura1 d3sdy11 d35c8h1 d1w7211 d1mvub\_ d1i9rh1  
d1ob1a1 d4wenb\_ d1yeeh1 d3ietc1 d1f58h1 d1ad0b1 d1mqkl\_ d1nbvh1  
d4b50a\_ d3r8bb\_ d1baf11 d1mamh1 d4rgne1 d2gsgb\_ d35c811 d1bafh1  
d1ailh1 d2pcpa1 d2fath1 d2x1pa\_ d1orsb1 d1ibgl1 d1shma\_ d1a2yb\_  
d1u0qa\_ d2coqa\_ d1hilb1 d1qfwi\_ d1jv5b\_ d1fn4b1 d5e0qa\_ d1nsnh1  
d1plgl1 d4ocxl1 d1kb5h1 d1rzfh1 d1pg7x1 d2fx7h1 d2oi9c\_ d1l7i11  
d3eyva1 d1d5i11 d4ffyl\_ d1tet11 d1a6wh\_ d1ac6a\_ d3dvfa\_ d1nfdel  
d1mimh1 d1ri8a1 d1jhlh\_ d3dura\_ d1fskb1 d1f97a1 d3so3b1 d2ak4d1  
d1lp9f1 d4z7wf1 d1l7th1 d4y5ya\_ d4x7ec1 d1emth1 d1ikfl1 d1nlbh1  
d4utal1 d1bjma1 d1eapb1 d1u6ah1 d2dtgd1 d1kj2b\_ d1xeda1 d1c1eh1  
d1fgvh\_ d2bnub1 d2fb4h1 d2dtgb1 d1ktrh\_ d1jpth1 d1qkz11 d4hepg\_  
d2atpb1 d1flrh1 d2hrpl1 d1mvfa\_ d1iaim1 d3k80a1 d2jb5h1 d3zkxc\_  
d4grwe\_ d1it9h1 d1rhhb1 d3w9ec\_ d1e4wh1 d1sy6h1 d2j6eh1 d3qxta\_  
d1jglh1 d1p7ka1 d1tzhb1 d4n8pa1 d1gaf11 d2jelh1 d1wioa2 d4i0cc1  
d1cicb1 d1lmka2 d1lmka1 d1iqwh1 d1lorqb1 d1ejoh1 d1jnlh1 d4zg1a\_  
d43c9b\_ d1ggbl1 d1wejh1 d3q6fa1 d1f3dj1 d3c61a1 d1bqlh1 d3p9wb\_  
d1a3r11 d1h0db1 d2uzil\_ d1eo811 d1qfwl\_ d1n7ml1 d1igja1 d1c5ch1  
d2a9mh\_ d1rmfh1 d1fj1b1 d4heme\_ d1ccza1 d1a5fh1 d1ogad1 d1dlfh\_  
d1qa9b\_ d1vgel1 d3qskb\_ d1sjxa\_ d4ozfg1 d1sq2n\_ d1qd0a\_ d1kcvh1  
d1c5db1 d3qcul1 d8faba1 d3bn9d1 d1mjuh1 d4y8dc\_ d7fabh1 d3dvgb1  
d1lo011 d1a6tb1 d1gigh1 d1kcrh1 d2hwz11 d1yjdc1 d3clfl1 d4krna\_  
d1d171\_ d1e6o11 d1mexh1 d3r0ma\_ d4kkna\_ d1fns11 d1oagh\_ d1rzia1  
d1lucbh1 d1ncwl1 d4b41a\_ d1nfdfl d2mpah1 d2d7t11 d4grwf\_ d4b5ea\_

d11k3h1 d3u79a\_ d4u3xa\_ d1ghf11 d1bvkb\_ d1mcww1 d1b88a\_ d1jrhh1  
d32c2b1 d4wemb\_ d1dsfh\_ d1op3h1 d1cell11 d1iqda1 d1qoka1 d1qoka2  
d1qfuh1 d2crya1 d1ay1h1 d1oaql\_ d3ab0b\_ d1rurl1 d1t4kb1 d1bz7b1  
d1n0xh1 d1for11 d1lucb11 d4w6yb\_ d43c9a\_ d2aabl1 d1tzia1 d4n1ca\_  
d1k6qh1 d3g9ab\_ d4tvsa1 d1igmh\_ d1pz5b1 d3dx9a1 d3wxwh\_ d1nakh1  
d1kcul1 d3eaka\_ d4qlra1 d1cr911 d1d9ka\_ d1f4x11 d1deea1 d2i27n2  
d1c12a1 d2orbl1 d1j8hd1 d1mcph1 d1c5da1 d1kenh1 d1bd2e1 d1h5ba\_  
d4x7fc1 d3upaa\_ d1t3fa1 d1indh1 d2dtgc1 d4hc111 d1zv5a1 d4wgvb\_  
d1uwgl1 d4f37k1 d1aqkh1 d1vesa\_ d3zkqd\_ d1fpt11 d1lo411 d1knob1  
d3rrqa\_ d1ct8b1 d4orz\_ d1mlbb1 d4hgkc1 d1dqd11 d1bogb1 d4ozhe1  
d1dr9a1 d1i7za1 d1dn0b1 d1kell1 d1rzi1 d1ypzf1 d1wtla\_ d1hkfa\_  
d1fail1 d1figh1 d2vyre\_ d1sjva\_ d1ohqa\_ d1bfoa1 d1pkqb1 d1mjul1  
d1b4j11 d1nsl1 d2arjb1 d1p4bh\_ d4aj0a\_ d3nn8b\_ d2rcja1 d1f2xk\_  
d4v1dd\_ d1adqh1 d2eksa\_ d4k3ga\_ d1jfqh1 d1uweh1 d1frgh1 d4gftb\_  
d1uz8b1 d4nlea\_ d1bm311 d1clo11 d3mcka1 d2vq1a1 d1ae6h1 d4aq1b1  
d1uj3b1 d1nbqa1 d1fh511 d2ck011 d2ywza\_ d1q7211 d4nbxb\_ d1hila1  
d4hz1b1 d2j8811 d1zmya1 d1cd0a\_ d1a4ka1 d1psk11 d1a0qh1 d4krmb\_  
d1ncbh1 d2fbjh1 d1j8he1 d1i3ua\_ d1cf811 d1fe8h1 d2plya1 d1leeqa\_  
d2x89a\_ d1o10a\_ d2r01h1 d1ub5a1 d1dfbh1 d3eyvb1 d4jdvb1 d4p2cg\_  
d2gsia1 d2agj11 d1u3ha1 d2h1ph1 d1rih11 d1fskc1 d1boga1 d2a7711  
d1osp11 d1qfoa\_ d3dwt\_ d2fx711 d1rz711 d3stba1 d1pkqa1 d1b6da1  
d1dzba2 d1dzba1 d1kj2a\_ d411ha\_ d1rzgb1 d1dqlh\_ d12e811 d1miel1  
d1jmaa\_ d1sbs11 d1fgnh1 d1f5811 d1mqkh\_ d1ndgb1 d3qeg11 d1ia111  
d2aw2a1 d1tqbc1 d3fo2a1 d4dkaa\_ d1f8th1 d2g6011 d2ywy\_ d1uj3a1  
d1yc7a\_ d3bd3a\_ d4w6xb1 d1nmb1\_ d1i8ka\_ d1rjlb1 d1ypze1 d1p7kb1  
d1kxqe\_ d1gpoh1 d2z4qa1 d1w72h1 d1i9r11 d4qgya1 d4xt1c\_ d2qqnh1  
d1cica1 d3c08h1 d2cd0a\_ d2bdnh1 d1hnga1 d1mam11 d1nldh1 d1cr9h1  
d41cih1 d3bkyh1 d3qg711 d1ai111 d1kxvc\_ d4iosd\_ d117ih1 d2x1qa\_  
d1ub6b1 d3k74b\_ d1ibgh1 d1teth1 d1igya1 d1hxma1 d2x6ma\_ d2e71a\_  
d5e03a\_ d1qfwm\_ d2r0kh1 d1igjb1 d1rurh1 d1plgh1 d1mj8h1 d1yuhb1  
d3fmg11 d1rzf11 d1emt11 d1ad9b1 d1igtb1 d1nlb11 d1d5ih1 d3k7ua\_  
d4ffyh\_ d1bwwa\_ d3dvga1 d1a6ta1 d1fgvl\_ d4qxgl1 d1mim11 d1jh11\_  
d2hffb1 d2hh011 d1qkzh1 d117t11 d1afvh1 d1iaii1 d2cjuh\_ d1um5h1  
d2ghwb2 d2ghwb1 d1kgce1 d2fgwh1 d1ikfh1 d1dvfd\_ d2i24n1 d2xtjb\_  
d1za3b1 d2yc1a\_ d2hh0h1 d2x1oa\_ d1bvka\_ d1rjla1 d5e7ba1 d1igta1  
d1i11b1 d2fb411 d1mvua\_ d1jpt11 d32c2a1 d1fvca\_ d1iqdb1 d2hrph1  
d2p4ab\_ d4qo1a\_ d1p2cb1 d1wt5c\_ d1t4ka1 d5c1mb\_ d1it911 d1bz7a1  
d1b2wh1 d1e4w11 d1jnl11 d1yedb1 d1za6b1 d3u7aa\_ d1igfh1 d3gnml1  
d1orsa1 d1wejl1 d1a2ya\_ d1hxmb1 d1gafh1 d2j4wh1 d1pz5a1 d1j05a\_  
d1a3rh1 d4fq111 d1qfwh\_ d1eo8h1 d1n7mh1 d4s11a\_ d1kegh1 d5da4a\_  
d1iqw11 d3whxb1 d1vgeh1 d1deeb1 d1c12b1 d1t2ql1 d1ad9a1 d3gsnb1  
d3b2uc1 d1ggbh1 d1t3fb1 d1nak11 d4ocmc\_ d1lila1 d2v7hb3 d2esve1  
d1mcoh1 d2qr0b1 d2q3aa\_ d1ct8a1 d1kcr11 d2pxyb\_ d2uzih\_ d5c3ld\_  
d3durb\_ d1c5c11 d2ak4e1 d1d17h\_ d1xiwd\_ d1mlba1 d1rmfl1 d1i7zb1

d1dlf1\_ d2xa3a\_ d5bq7b1 d1dqqb1 d3h42l1 d1egjh1 d1kcvl1 d1fe8l1  
d2j6e11 d1f3rb2 d1lk3l1 d1sm3h1 d1q0xh1 d1ghfh1 d7fabl1 d1igch1  
d1l00h1 d4idla\_ d5c2b1\_ d1jrh11 d1l1l1a1 d3zhda1 d4kfzc\_ d1b0wa\_  
d1e6oh1 d1mexl1 d4krpb\_ d1fnsh1 d1ncwh1 d4hgma\_ d4eigb1 d4rzca\_  
d2mpa11 d4y5xa\_ d5en2b1 d3lrga1 d4ej1c1 d1rhha1 d1j05b\_ d1forh1  
d1q9wb1 d2wzpd\_ d2aq2a1 d1h0da1 d3revb1 d2ij0c1 d1tzha1 d4m7j11  
d1k6q11 d3b9kc1 d1igml\_ d3qeua1 d1dsfl\_ d1celh1 d1kcuh1 d1zvha1  
d1zvoa1 d1tqbb1 d1ay1l1 d2qscl1 d2cgrh1 d1nl0h1 d1kenl1 d3eo0a1  
d4n9ob1 d1n0xl1 d3k1kc\_ d1c4qa\_ d1prtc1 d2wv6d\_ d1prtf\_ d1ltrd\_  
d4l63b1 d1r4pb\_ d1prtd\_ d1t10f\_ d2bosa\_ d1prtb1 d3chbd\_ d2aq2b1  
d1ck1a1 d1lenfa1 d1i4pa1 d1v1oa1 d1et9a1 d1esfa1 d2g9hd1 d4ohja1  
d1bxta1 d1eu3a1 d1ty0a1 d1fnua1 d2cqva1 d1fhga\_ d2k1ma\_ d2dl2a1  
d1biha3 d1biha1 d1biha4 d3qp3a1 d1g1ca\_ d1gxea\_ d1cvsc2 d1cvsc1  
d1xmwa2 d1m4ka2 d2otpa2 d1biha2 d1rhfa2 d2fcba2 d2fcba1 d1wwbx\_  
d1gsma2 d1epfa1 d1epfa2 d2dava1 d1waaa\_ d1f97a2 d1x44a1 d1vcaa2  
d1fnla2 d1fnla1 d3b5ha2 d3h8na2 d3h8na1 d1jbj1a1 d1jbj2a1 d1pd6a\_  
d1f2qa2 d1f2qa1 d3cx2a\_ d1nbqa2 d3b5ha1 d1n26a1 d1xiwb\_ d1xaua\_  
d1fltx\_ d2ifga1 d1olla1 d1olla2 d1cs6a4 d1cs6a3 d1cs6a2 d1cs6a1  
d2gw5a2 d1sy6a1 d1xiwa\_ d1lucta2 d1lucta1 d1ry7b2 d1gl4b\_ d1qz1a3  
d1olza1 d2c9aa1 d1wwca\_

**Family-61 (c.37.1.10)**

**Positive dataset contains 13 protein sequences.**

d1vmaa2 d2p67a1 d3ihla\_ d1slma2 d2v40a\_ d3hida\_ d2vola1 d2g0ta1  
d1vcoa2 d1xjca\_ d2qm8a\_ d4ioja\_ d1yrba2

**Negative dataset contains 3717 protein sequences.**

d1m32a\_ d1libja\_ d1c7na\_ d1iuga\_ d4q75a\_ d2bkwa1 d1t3ia\_ d1n8pa\_  
d1qz9a\_ d1eg5a\_ d1p3wa\_ d3kgwa\_ d1cl1a\_ d2ctza1 d1vjoa\_ d2rfva\_  
d1gc0a\_ d1cs1a\_ d1d2fa\_ d2ch1a1 d1qgna\_ d1pffa\_ d1elua\_ d1c7ga\_  
d2v1pa1 d2ez1a\_ d1u08a\_ d1lc5a\_ d1b5pa\_ d2ay1a\_ d1bw0a\_ d3pd6a\_  
d7aata\_ d2csta\_ d1j32a\_ d1fg7a\_ d4wlha\_ d1o4sa\_ d1v2da\_ d1gdea\_  
d1m6sa\_ d1v72a1 d1svva\_ d1ajsa\_ d1wsta1 d2f8ja2 d1lk9a\_ d1vp4a1  
d1xi9a1 d2gb3a1 d3i2ka1 d1mpxa2 d1xkta1 d2hfka\_ d1jmkc\_ d5d3ka\_  
d2cfba1 d1dfoa\_ d1o69a\_ d1bj4a\_ d3k28a\_ d2bwpa\_ d3lg0a\_ d2fnua\_  
d3ou5a\_ d1z7da1 d1b9ha\_ d1iaya\_ d4msoa\_ d1bs0a\_ d1s0aa\_ d1sffa\_  
d3tqxa\_ d1mdoa\_ d3qboa\_ d3pgya\_ d2dkja\_ d1ejia\_ d1vefa1 d4wxga\_  
d3bs8a\_ d3gbxa1 d1w23a\_ d3lgia\_ d3i77a\_ d2z9ia2 d4nsva\_ d1lcya2  
d4jcna\_ d1agja\_ d1os8a\_ d1p3ca\_ d1l1ja\_ d1qtfa\_ d1ddla\_ d1auyb\_  
d1qnia1 d1fwxa1 d2wo3b\_ d1shxa\_ d1f56a\_ d1bypa\_ d1azca\_ d1ws8a\_  
d3u25a\_ d1cuoa\_ d1lid2a\_ d1rkra\_ d2iaac\_ d4dp1x\_ d1nwpa\_ d2gima\_  
d2i7sa\_ d1qhqa\_ d1gyca3 d1hfua2 d1kbva1 d1kbva2 d1sdda1 d1sdda2  
d1gyca1 d1gyca2 d1mzya1 d2bw4a1 d1aoza1 d1aoza3 d1aoza2 d1kyaa2  
d1kyaa3 d1kyaa1 d1mzya2 d4e9sa1 d1sddb1 d1sddb2 d1hfua1 d1hfua3  
d1oela2 d1oela1 d1v10a2 d1v10a3 d1v10a1 g1f8v.1 d1novc\_ d2bbvc\_  
d3sxwa1 d4luka\_ d1iknc\_ d3brda1 d1p7h11 d1oy3c\_ d1imhc1 d1gjia1

d1zk9a1 d2cxka1 d2h0va\_ d4alac\_ dlrera1 d1s6na\_ d3uzqb\_ d2phla2  
d2phla1 d1fxza2 d1fxza1 d1lrha\_ dluija1 gldgw.1 d2v09a\_ dluka2  
dluka1 d1dgwa\_ d1ogpa1 d1ds6b\_ d1fstb\_ d1ex0a1 d1g0da1 d3us3a3  
d3us3a1 d1tafa\_ d1bh9b\_ d1jfib\_ d1q9ca\_ d1h3ob\_ d2byka1 d1n1ja\_  
d4g92b\_ d1bh9a\_ d1jfia\_ d1h3oa\_ d2bykb1 d1n1jb\_ d1k9ua\_ d2opoa\_  
d1r0ka3 d1j5pa3 d1vkoa2 d1vm6a2 d3qvsa2 d1p1ja2 d2ovga\_ d1sq8a\_  
d1rzsa\_ d3kz3a\_ d3orca\_ d3gpdg2 d2q49a2 d1hdgo2 d2g17a2 d2cvoa2  
d2czca1 d3pwka2 d1obfo2 d1i32a2 d1zyao2 d2pkqo2 d1b7go2 d2hjsa2  
d1cf2o2 d1vkna2 d1nvm2 d2msya\_ d2djoa1 d2r5za\_ d1au7a1 d1f43a\_  
d2lmda1 d1akhb\_ d1s7ea1 d3nara\_ d1zq3p1 d2craa1 d1mija\_ d4uuta\_  
d3a01a\_ d1x58a1 d3rka1 d3cmya1 d2cqxa1 d2da6a1 d1e3oc1 d1fjla\_  
d1mh3a1 d1ig7a\_ d1x41a1 d1wh7a1 d1gt0c1 d2mw8a\_ d1lfup\_ d1x2ma1  
d1b72a\_ d1wi3a1 d1jgga\_ d1wjha1 d1x2na1 d1mnm\_ d2cuea1 d3k2aa\_  
d2hosa\_ d2jwta2 d1pufa\_ d1oact1 d2hi3a\_ d1b8ia\_ d4j19a\_ d3lnqa\_  
d1wh5a1 d1b8ib\_ d2iu5a1 d1zk8a1 d2g7sa1 d2fd5a1 d2np5a1 d1z0xa1  
d2id6a1 d2d6ya1 d2i10a1 d1vi0a1 d2oi8a1 d3c07a1 d2ns7a1 d2fq4a1  
d2yvea1 d1t33a1 d2o7ta1 d1rkta1 d2np3b1 d2g7ga1 d2gena1 d2fbqa1  
d2g7la1 d2gfna1 d2g3ba1 d2jj7a1 d2hyja1 d1sgma1 d1ui5a1 d2hkua1  
d2id3a1 d4jyka1 d2av4a1 d1s5ja2 d1qhta2 d4dlea2 d1tgoa2 d3py8a2  
d1q8ia2 d1kfsa2 d2py5a2 d1d5aa2 d1k8ka2 d1k8ka1 d3uleb1 d3i33a2  
d3i33a1 d1bupa1 d1dkgd2 d1dkgd1 d4ci6a2 d1jcfa1 d4a2ba2 d2fxua1  
d1yaga2 d1yaga1 d4cbua2 d1bupa2 d1g99a1 d2e1za2 d2e1za1 d1saza1  
d1saza2 d1ig8a1 d1czan2 d1czan3 d1czan1 d1ig8a2 d1czan4 d1bg3a3  
d1bg3a2 d1bg3a1 d3h3no1 d3h3no2 d3ezwa2 d1zc6a1 d1zbsa1 d1zbsa2  
d1zc6a2 d2ch5a2 d2ch5a1 d1zxo2 d1zxo1 d1hroa\_ d4gedb\_ d3zooa\_  
d1mz4a\_ d1gu2a\_ d1f1fa\_ d1dvva\_ d1c6ra\_ d1c75a\_ d1e29a\_ d1gdva\_  
d1cnoa\_ d1h32b\_ d1co6a\_ d2bh4x\_ d2aiua\_ d5cytr\_ d1jdl\_ d1i8oa\_  
d2zboa\_ d3dmia\_ d1wvec\_ d2yk3a\_ d3ph2b\_ d1dw0a\_ d5aura\_ d1ql3a\_  
d1qn2a\_ d1f1ca\_ d4zzva\_ d2xspa\_ d1egla\_ d4v20a\_ d4ipma1 d1gpia\_  
d4csia\_ d3pfza\_ d3ovwa\_ d2yoka\_ d1prtc2 d1prtb2 d2ah2a1 d1h32a1  
d1evsa\_ d1cnt1\_ d1pvhb\_ d1z7ca\_ d1huwa\_ d1bgea\_ d1f6fa\_ d1f45b\_  
d1ilrb\_ d1axia\_ d1etea\_ d3tgxb\_ d1scfa\_ d2z3qa1 d3qb1a\_ d1hula\_  
d1m48a\_ d4nkqb\_ d1eera\_ d1v7mv\_ d5e4ea\_ d2o27a\_ d3b5ka\_ d2psma1  
d4zf7a\_ d3uf5a\_ d4x51a\_ d1d9ca\_ d4ypgc1 d3oq3a\_ d1lqsl\_ d1n1fa\_  
d1aula\_ d1wu3i\_ d3bes1\_ d3ux9a\_ d3rbaa\_ d2qtra\_ d1nupa\_ d3l92a\_  
d1f9aa\_ d1qjca\_ d2h29a\_ d1vlha\_ d1od6a\_ d1lw7a1 d1mrza2 d4ruka\_  
d2e17a\_ d1liq0a2 d1irxa2 d1r6ta2 d1ivsa4 d2cyba\_ d1rqga2 d1j09a2  
d2yxna\_ d1f7ua2 d1h3fa1 d1ffya3 d2g36a1 d1nzja\_ d1jila\_ d1n3la\_  
d1i6la\_ d1pfva2 d1h3na3 d3n9ia\_ d3sz3a1 d3sw2a\_ d1moxc\_ d1dx5i3  
d1edmb\_ d1aut12 d1aut11 d1nqlb\_ d1dva11 d1szba2 d1kigl\_ d2y5f1\_  
d1ijqa2 d1gk5a\_ d1g1sa2 d1nt0a3 d1lmja2 d1lmja1 d1nzia2 d2wphe\_  
d1klil\_ d1pfx12 d1pfx11 d1p9ja\_ d1g1ta2 d1f7ea\_ d4yzub\_ d1mlxb5  
d2y5ia\_ d1psra\_ d3n22a\_ d2egda\_ d4ggfc\_ d2wcea\_ d2luca\_ d4aqia\_  
d3nsia\_ d2lp3a\_ d1j55a\_ d1a4pa\_ d1k8ua\_ d1nsha\_ d1pvaa\_ d3fs7a\_

d2pvba\_ d1ttxa\_ d1rwya\_ d2kyfa\_ d1rk9a\_ d1exra\_ d1tiza1 d1nyaa\_  
d1g8ia\_ d1ggwa\_ d1wdcc\_ d3fwba\_ d1ggza\_ d2o5ga\_ d1ctaa\_ d1m45a\_  
d3i5gc\_ d1s18a\_ d1fpwa\_ d2scpa\_ d2roaa\_ d4aqra\_ d3pn7b\_ d1br1b\_  
d2mysb\_ d1s6ca\_ d1bjfa\_ d2obha\_ d1jfk\_ d1jff0a\_ d1qv0a\_ d1lkja\_  
d2mlfc\_ d2m97a\_ d2d8na\_ d4by5a\_ d1jbaa\_ d4nqga\_ d1wdcb\_ d2mysc\_  
d1j7qa\_ d1s6ia\_ d1uhka2 d1r2ua\_ d1dtla\_ d3kf9a\_ d3pn7c\_ d1gjya\_  
d1y1xa\_ d1hqva\_ d1dvia\_ d1df0a1 d1qxp2 d4usla\_ d1k94a\_ d1wkya2  
d1uuqa\_ d3wh9a\_ d4m1ra\_ d1xyza\_ d4xuya\_ d2je8a5 d4bf7a1 d3cuia\_  
d1ur4a\_ d1qw9a2 d1odza\_ d2vzsa5 d1bqca\_ d2x2ya1 d1qnra\_ d4y7ea1  
d1vjza\_ d4k68a\_ d2v3ga\_ d4hpga\_ d1nofa2 d1nq6a\_ d1h4pa\_ d1aq0a\_  
d3ziza\_ d4bs0a\_ d1ecea\_ d1h1na\_ d1ta3b\_ d1w91a2 d1i1wa\_ d1uhva2  
d1us3a2 d1egza\_ d7a3ha\_ d1tvna1 d3nyda1 d1ghsa\_ d2cyga1 d4xv0a\_  
d2c8na2 d1w32a\_ d3emca\_ d1v6ya1 d1foba\_ d2uwfa1 d2fgla\_ d3niya1  
d2c0ha1 d1rh9a1 d1yq2a5 d1szna2 d1fa2a\_ d1pama4 d5do8a1 d1ea9c3  
d1hx0a2 d2fhfa5 d1qhoa4 d1avaa2 d1m53a2 d4m8ua1 d2gjpa2 d1lwha2  
d4howa1 d1ktba2 d1j0ha3 d3vm5a1 d2x1ia\_ d1wzaa2 d1uasa2 d2diea1  
d1mxga2 d1ht6a2 d1eswa\_ d1liv8a2 d5cpsa\_ d1ud2a2 d1zjaa1 d3gbea1  
d1kwga2 d1wdpa\_ d1gcya2 d1g5aa2 d1hvxa2 d3dhpa2 d2bhua3 d4do4a1  
d3qgva1 d1e43a2 d1g94a2 d2d3na2 d1gjwa2 d1gvia3 d1x1na1 d1r7aa2  
d1tz7a1 g1apy.1 d3ljqa\_ d4toqa\_ d1wb0a1 d1w9pa1 d1eoka\_ d1itxa1  
d1kfwal d1goia2 d1edqa2 d2gsja\_ d1hjxa1 d1jnda1 d1vf8a1 d3wdpp1  
d3wq5a\_ d1gnxa\_ d4gxpa\_ d4hz8a\_ d1e4mm\_ d3aiua\_ d1wcca1 d1qvba\_  
d3ahxa\_ d1v02a\_ d2dgaa\_ d1pbga\_ d1vffa1 d1qoxa\_ d4ha4a\_ d2w0pa\_  
d2diaa1 d2e9ia2 d2e9ja1 d2dj4a1 d2eeba1 d2diba1 d2dmba1 d2dmca1  
d2d7oa1 d2ee6a1 d2d7pa1 d2eeaa1 d2di8a1 d1wlha1 d2d7na1 d2nqca\_  
d2d7ma1 d2dica1 d3cnka\_ d2k3ta1 d2eeca1 d1qfha1 d2bp3a1 d1v05a\_  
d2ee9a1 d2eeda1 d2di9a1 d3syxa1 d1mkea1 d2p8va\_ d1xoda1 d1i7aa\_  
d1evha\_ d1legxa\_ d1lid1a\_ d2hmta\_ d1lssa\_ d1iuka\_ d2csua1 d3q9ub\_  
d2yv1a1 d3q9na\_ d2d59a\_ d1oi7a1 d2yv2a1 d1euca1 d1y81a1 d3nvva1  
d2h88b1 d1n62a2 d1t3qa2 d1kf6b2 d1zoyb1 d1jq4a\_ d1ffva2 d1dgja2  
d1rm6c2 d1d4ua2 d9ldta1 d2ewda3 d1up7a1 d2dfda1 d1s6ya1 d1vjta1  
d7mdha1 d1hyea1 d1t2da1 d1oj3a3 d1b8pa1 d1ldna1 d1hyha1 d1civa1  
d2a92a1 d1ez4a1 d1i0za1 d1y6ja1 d1gv0a1 d1ur5a1 d1llda1 d1lobba1  
d1npya1 d3t4ea2 d1a4ia1 d1o0sa1 d2hk9a2 d2egga2 d1b26a1 d1bvua1  
d1gq2a1 d1c1da1 d1leha1 d1gtma1 d1euza1 d1nvtal d3dona2 d1edza1  
d1vi2a1 d1p77a1 d1nyta1 d1b0aa1 d1v16a1 d1v91a1 d1txga2 d3f47a1  
d1mv8a2 d2pv7a2 d1xc2a3 d2ahra2 d4xiya1 d2f1ka2 d1pgja2 d1i36a2  
d1np3a2 d1lj8a4 d1teaa3 d1qmga2 d2i76a2 d2g5ca2 d1wdka3 d1dlja2  
d3cuma3 d1kola2 d1f8fa2 d1qora2 d1jqba2 d1vj0a2 d1cdoa2 d1gu7a2  
d1d1ta2 d1xa0a2 d2dm6a2 d1jvba2 d1rjwa2 d1h2ba2 d1tt7a2 d1piwa2  
d1o89a2 d1iz0a2 d1e3ja2 d1yb5a2 d1uufa2 d1vj1a2 d1e3ia2 d3gpdg1  
d1vc2a1 d2nvwa1 d1u8fo1 d1ydwa1 d1hdgo1 d2g17a1 d1cf2o1 d2czca2  
d1r0ka2 d1obfo1 d2cvoa1 d1ebfa1 d1h6da1 d1i32a1 d1zh8a1 d2q49a1  
d1qkia1 d1j5pa4 d3pzra1 d1xeaa1 d1vkoa1 d1vm6a3 d3qvsa1 d2pkqo1

d1b7go1 d1gr0a1 d1p1ja1 d1lc0a1 d1j0xo1 d3pwka1 d2hjsa1 d1zyao1  
d1vkna1 d1tlta1 d1nvmbl d3sjua\_ d3ojfa1 d1xu9a1 d2jjya1 d1y1pa1  
d1h5qa\_ d1jtva\_ d4fs3a\_ d2bkaa1 d1gy8a\_ d2c5aa1 d1ulsa\_ d1ooea\_  
d2b69a1 d1y5ma1 d1spxa\_ d1aela\_ d1bxka\_ d1ydea1 d1gega\_ d1hdoa\_  
d1o5ia\_ d1e6ua\_ d1snya1 d2rhca\_ d3zv4a\_ d5ceja\_ d2d1ya1 d1fjha\_  
d3w8ea\_ d2fmua1 d1x1ta\_ d1rpna\_ d3ay7a1 d1k2wa\_ d1eq2a\_ d2hrba1  
d3ruaa\_ d2ew8a1 d4hwka\_ d1xgka\_ d2bd0a1 d1yo6a1 d2a35a1 d2ntva\_  
d1vl8a\_ d1hdca\_ d4bkua\_ d2ag5a1 d2q45a\_ d1nffa\_ d4iy1a\_ d1zbqa1  
d1kewa\_ d1ek6a\_ d1ja9a\_ d2q46a2 d1iy8a\_ d1cyda\_ d2ptga\_ d1hxha\_  
d1uzma1 d3lyla\_ d4m89a\_ d3weya\_ d2b11a1 d1w6ua\_ d1sb8a\_ d2q2va\_  
d4nr0a\_ d1e6wa\_ d2gasa\_ d3oiga1 d2bgka1 d1mxha\_ d1vl0a1 d1rkxa\_  
d1r6da\_ d1wmaa1 d1e7wa\_ d2c07a1 d1xkqa\_ d3tzha\_ d1g0oa\_ d3lz6a\_  
d1qyca\_ d1ledoa\_ d1gz6a\_ d1oc2a\_ d1t2aa\_ d1zema1 d2xoxa\_ d1z45a2  
d1geea\_ d1p33a\_ d31t0a\_ d4e6pa\_ d2wyua\_ d1db3a\_ d4q9na\_ d1xhla\_  
d4o1ma\_ d1fmca\_ d2uvda\_ d2gdza1 d1uaya\_ d2z1ma\_ d2o23a2 d2fr1a2  
d2fr1a1 d1qsga\_ d1qyda\_ d4zjua\_ d2a4ka1 d1yb1a\_ d1wvga1 d1yxma1  
d3f4ba\_ d1mg5a\_ d1xg5a1 d1r55a1 d3gboa\_ d1atla\_ d1kufa\_ d1buda\_  
d4q1la\_ d1quaa\_ d1ypl1a\_ d1wnia\_ gly43.1 d4ekfa\_ d2ckga\_ d1th0a\_  
d2bkra\_ d1cmxa\_ d1xd3a\_ d3ifwa\_ d4c5pa\_ d2bsza1 d4bgfa\_ d1w4ta1  
d1mixa2 d1e5wa2 d1j19a2 d1isna2 d2a16b2 d3ioqa\_ d1fh0a\_ d1khqa\_  
d1m6da\_ d2cb5a\_ d1cs8a\_ g8pch.1 d1s4va\_ d2pnsa\_ d1vsna1 d1mira\_  
d1iwda\_ d2oula\_ d7pcka\_ d3bwka\_ d3bcna\_ d2p86a\_ d1pvja\_ d1pcia\_  
d1gece\_ d1deua\_ d4bs6a\_ d1xkga1 d1cqda\_ d1jqpa2 d2c0ya\_ d2bdza\_  
d3p5ua\_ d2o36a\_ d1ex4a2 d1c6va\_ d2jk6a2 d2jk6a1 d1feca1 d1feca2  
d1lpfa1 d1lpfa2 d1xhca1 d1xhca2 d1dxla2 d1dxla1 d1gera2 d1m6ia2  
d1onfa1 d3lada2 d3lada1 d1w4xa1 d1w4xa2 d1gesa2 d1mo9a1 d1xdia1  
d1fl2a2 d1fl2a1 d1fcda1 d1fcda2 d1h6va2 d1h6va1 d1mo9a2 d1gv4a2  
d1gv4a1 d2gv8a2 d2gv8a1 d1aoga1 d1aoga2 d1hyua1 d1ebda1 d1ebda2  
d3dk9a1 d1q1ra2 d1q1ra1 d1gesa1 d1zbf1a1 d2z1ha\_ d2etja1 d3qioa1  
d1j11a\_ d2e41a\_ d1j12a\_ d2lsna1 d1io2a\_ d1uaxa\_ d2yv0x\_ d1mu2a1  
d1ekea\_ d1i39a\_ d1ep0a\_ d2pa7a1 d1wlta1 d1nxma\_ d2c0za1 d1pn0a1  
d1reo1 d1ju2a1 d2f5va1 d3c96a1 d2gmha1 d1pj5a2 d1gpea1 d1o5wa1  
d1n4wa1 d1k0ia1 d2dw4a2 d2ivda1 d1seza1 d2voua1 d1kdga1 d1s5ja1  
d2hbja2 d2igia\_ d1wlja\_ d1qhta1 d4dlea1 d1tgoa1 d2f96a1 d3tr8a1  
d3mxma\_ d1q8ia1 d1y97a1 d1w0ha\_ d1kfsa1 d2py5a1 d1noya\_ d1d5aa1  
d1yt3a3 d2guia\_ d3mwp1a1 d4kb1a\_ d2y8ga\_ d1xkea1 d2y8fa\_ d2v76a\_  
d1wj1a1 d1aqca\_ d1qqga2 d1qqga1 d1ntva\_ d1n3ha\_ d4dbba\_ d3f0wa1  
d1p3ra\_ d1wgua1 d2cy4a1 d3hqca\_ d1wvha1 d1xr0b1 d1kb0a1 d1wgqa1  
d1v89a1 d2coda1 d1zc3b\_ d1wg7a1 d1u5ea1 d1v61a1 d2coca1 d2ys1a1  
d1v5pa1 d1ntya2 d1wjma1 d1wi1a1 d1u29a\_ d1xx0a1 d1unqa\_ d2zkmx3  
d1fhoa\_ d1v88a1 d2adza1 d1x1fa1 d1p6sa\_ d2coaa1 d1btka\_ d1v5ma1  
d1faoa\_ d2x18a\_ d1dyna\_ d1x1ga1 d4kaxb\_ d2j59m1 d1kilb2 d1xcga2  
d1txda2 d1u5da1 d1dbha2 d1wlha\_ d1upqa\_ d1v5ua1 d2fjla1 d1eaza\_  
d2dfka2 d2cofa1 d1kz7a2 d1faaa\_ d1wika1 d1xfla\_ d1ttza1 d2f51a1

d1ti3a\_ d1nhoa\_ d1sena\_ d2i4aa\_ d1ep7a\_ d1zmaa1 d1fo5a\_ d3lefa1  
d3diea1 d2yana1 d1z6na1 d1oaza\_ d3zywa1 d4aj8a\_ d1nm3a1 d4fiwa\_  
d1wmja\_ d4hs1a1 d1i1oa\_ d1xwaa1 d1wjka1 d2vm1a\_ d1fb6a\_ d1gh2a\_  
d1h75a\_ d1nw2a\_ d1ku5a\_ d1f1ea\_ d1b67a\_ d2b5ea2 d2b5ea3 d2b5ea1  
d2b5ea4 d2kp1a1 d2kp2a1 d1hyua3 d1hyua4 d1j08a1 d1j08a2 d1pd212  
d1nhya2 d2a2ra2 d1k0dd2 d1gsua2 d1f3ba2 d2fhea2 d2pvqa1 d1tw9a2  
d1oyja2 d1e6ba2 d1k0ma2 d3ik7a1 d4is0a1 d1r5aa2 d1jlva2 d1m0ua2  
d3gtub2 d1z9ha2 d1okta2 d1axda2 d2gsra2 d1tu7a2 d1k3ya2 d1zgm1  
d1b48a2 d1gnwa2 d1gwca2 d2gsta2 d1glqa2 d1oe8a2 d1pn9a2 d1v2aa2  
d1fw1a2 d1duga2 d3vrda1 d3vrda2 d1fcdc2 d1fcdc1 d1h1oa2 d1h1oa1  
d1m70a2 d1nira1 d1qksa1 d3h1jd1 d4ilya\_ d4olta\_ d1qgia\_ d1qqya\_  
d1gd6a\_ d1f6ra\_ d1ivma\_ d2gv0a\_ d1iiza\_ d2z2fa\_ d1j8xa\_ d1gh1a\_  
d1b9oa\_ d1741a\_ d1691a\_ d2o4wa\_ d1p37a\_ d1k28a3 d1xjta1 d1jtma\_  
d2f2qa\_ d4e97a1 d1iyka2 d1iyka1 d1rxta1 d1iica1 d2za0a\_ d2c21a1  
d1f9za\_ d2pjsa1 d1k11a\_ d2i7ra1 d1xqaa1 d5cj3a1 d1npba\_ d1jifa\_  
d2p7oa\_ d1r9ca\_ d1nkia\_ d1mpya2 d1kw3b2 d1kw3b1 d4ghga1 d1tfza1  
d3isqa1 d3isqa2 d1sqia1 d1sqia2 d1lkda2 d1lkda1 d1mpya1 d1cjxa2  
d1cjxa1 d1sp9b2 d1t47a1 d1t47a2 d1f1ua2 d1sp8a1 d1sp8a2 d1flua1  
d2bema\_ d1pama1 d1ea9c1 d1qhoa1 d2fhfa2 d2fhfa1 d1k3ia1 d1j0ha1  
d1cxl1a1 d2bhua1 d1edqa1 d1f1sa2 d1ut9a2 d1gvia1 d1txka1 d1w5qa\_  
d2c1ha\_ d1oh1a\_ d1l6sa\_ d1qsta\_ d2beia1 d4m3sa\_ d1u6ma1 d1ygha\_  
d1yk3a1 d3dr6a\_ d1xmta\_ d1z4ea1 d2ge3a1 d1bo4a\_ d2fiaa1 d2jdca1  
d1y9wa1 d3to7a\_ d1wwza1 d2f14a1 d2ozua1 d2b5ga\_ d2cy2a1 d2p0wa\_  
d1cm0a\_ d4pswa\_ d1yrea1 d1yr0a1 d1m4ia\_ d2gana1 d1yvka1 d1ghea\_  
d2g3aa1 d1y7ra1 d2euia1 d1q2ya\_ d2fsra1 d1xeba\_ d2ae6a1 d1cjwa\_  
d1qsm1a\_ d2aj6a1 d1y9ka1 d1i12a\_ d1vkca\_ d2atra1 d1n71a\_ d2d4pa1  
d2fiwa1 d2fe7a1 d1tiqa1 d2ou2a\_ d1yx0a1 d2fcka1 d2j8ma\_ d2pq8a\_  
d1z4ra1 d1s3za1 d1ufha\_ d1dgsa2 d1fvia1 d1p16a1 d1x9na2 d2nqya\_  
d1h4ga\_ d1hixa\_ d1oa2a\_ d1olra\_ d3b7ma\_ d4h7ma1 d3wp3a\_ d2vgda\_  
d3zsea\_ d2nlra\_ d3wx5a\_ d1oa3a\_ d1pvxa\_ d1m4wa\_ d1f5ja\_ d1oa4a\_  
d1ks5a\_ d4ix1a1 d1x14a1 d3vsqa\_ d2gixa1 d1p7ba1 d1xvqa1 d1pn0a2  
d3hy2a\_ d2cvba1 d1o8xa\_ d1lu4a\_ d1we0a1 d2bmx1a1 d2a4va1 d1psqa\_  
d1xiya1 d1q98a\_ d1n8ja\_ d1zofa1 d2ggta\_ d3tjja\_ d4je1a1 d1o73a\_  
d3s9fa\_ d2zcta\_ d1jfua\_ d2b1ka\_ d5dvba1 d2b5xa1 d2v2ga\_ d1st9a\_  
d3tb2a\_ d4llra\_ d4fh8a1 d1e2ya\_ d1knga\_ d2h30a\_ d1i5ga\_ d2z9sa\_  
d2f8aa1 d1tp9a1 d2b7ka\_ d1nm3a2 d3hvva\_ d2wfca1 d4kcea\_ d1xvwa1  
d4gqca1 d3qpma\_ d4k1fa\_ d1zzoa1 d1gp1a\_ d1prxa\_ d4od7a1 d1z6ma1  
d4mcua1 d4dvca1 d3l9sa\_ d1un2a\_ d3rppa\_ d1rmka\_ d1ixta\_ d1eyoa\_  
d1cna1 d1fu3a\_ d1g1pa\_ d1fyga\_ d1e88a1 d1l6ja5 d1l6ja4 d1leaka4  
d1leaka3 d1l6ja3 d1h8pa2 d1etha2 d1w52x1 d2ppla1 d1lpbb2 d2oxea1  
d1bu8a2 d1rp1a2 d1ys1x\_ d4hs9a\_ d1ispa\_ d1ex9a\_ d1ku0a\_ d3qmma\_  
d2h1ia1 d2r8ba1 d3b5ea1 d3cn9a\_ d1auoa\_ d4l3wa\_ d1llfa\_ d1gz7a\_  
d1ukca\_ d2hqya1 d2hqya2 d1lrza2 d1ne9a1 d1lrza3 d1c4xa\_ d1jl1a\_  
d2rhwa\_ d3groa\_ d1pjaa\_ d1thta\_ d1ra6a\_ d1muka\_ d3gsza\_ d1khva\_



d1te9a\_ d2xwha\_ d3uqsa\_ d3hkwa\_ d3n6ma\_ d2cjqa\_ d2xyma\_ d1teba\_  
d1te8a\_ d1s48a\_ d1u09a1 d4wfxa\_ d3tyqa\_ d2pgga1 d3zxha\_ d1cgl\_a\_  
d1rm8a\_ d1eaka2 d2jsda\_ d1cxva\_ d1hv5a\_ d1i76a\_ d3p0ya1 d1igra1  
d1igra2 d1n8yc2 d1n8yc1 d1m6ba2 d1m6ba1 d1jx4a2 d3gv5b1 d1t94a2  
d3bq0a2 d2tbvc\_ d1c8nc\_ d1x36a\_ d1smvc\_ d1ng0c\_ d4sbvc\_ d1f2nc\_  
d1cixa\_ d1y29a\_ d1v7fa\_ d2jtba\_ d1g9pa\_ d1lupa\_ d1qk7a\_ d1mb6a\_  
d2a2va\_ d1niya\_ d1i25a\_ d1hvwa\_ d2mpqa\_ d1ie6a\_ d1kqha\_ d1la4a\_  
d2mxoa1 d1dl0a\_ d1koza\_ d1qk6a\_ d1emxa\_ d1lqra\_ d1c6wa\_ d1js9c\_  
d1f15b\_ d1za7a\_ d1rypd\_ d1irua\_ d1rypc\_ d3unfk\_ d1rypa\_ d1j2pa\_  
d1irui\_ d1j2qh\_ d3unfh\_ d1m4ya\_ d1rypb\_ d1irul\_ d1irug\_ d1iru2\_  
d1q5rh\_ d1rypg\_ d1g3ka\_ d1q5qa\_ d1e94a\_ d1irub\_ d1ryph\_ d3ty6a\_  
d1iruj\_ d1iruk\_ d1rype\_ d1irud\_ d1irue\_ d3mi01\_ d1rypf\_ d1iruh\_  
d2z3ba\_ d1iruc\_ d3mka2\_ d1irul\_ d1ny721 d1a6ca3 d1a6ca2 d1a6ca1  
d1pgl22 d1pgl21 d1pgl11 d1ny711 d1mqta\_ d1d4m3\_ d1fmd3\_ d2mev1\_  
g1aym.1 d1ev13\_ d4q4w1\_ d1r1a3\_ d2x5ia\_ d1rhi1\_ g1r1a.1 g1d4m.1  
g1rhi.1 d1b35b\_ d1loopa\_ d4iv1a\_ g1pvc.1 g1fpn.1 d1fpn1\_ d4gb31\_  
d1d4m1\_ d1fmd1\_ d1ev11\_ d2wzr3\_ g1cov.1 d1qqp3\_ g1fmd.1 d2x5ic\_  
d1rhi3\_ g1oop.1 d1hxs1\_ g1hxs.1 d1fpn3\_ d1bev1\_ g2mev.1 d1 Leah3\_  
d1aym1\_ d1pvc3\_ d1qqp1\_ d1zba3\_ d1h8ta\_ d3vbhc\_ g1b35.1 g1bev.1  
d1hxs3\_ g1ev1.1 d1bev3\_ g1tmf.1 d1tmf1\_ d1b35a\_ d2mev3\_ g1 Leah.1  
g1h8t.1 d1 Leah1\_ d4q4w3\_ d1r1a1\_ d1aym3\_ d1pvc1\_ d1zba1\_ d1h8tc\_  
d1oopc\_ d1tme3\_ g1qqp.1 d4iv1c\_ g1tme.1 d3ubub\_ d1legia\_ d1qo3c\_  
d1v7pa\_ d1tdqb\_ d3ubua\_ d1c3ab\_ d1h8ua\_ d3bx4b\_ d1t8ca1 d1sb2a1  
d1qdda\_ d2ziba1 d3cada\_ d1byfa\_ d1j34b\_ d1jwia\_ d1jzna\_ d1c3aa\_  
d1oz7b\_ d1wmza\_ d3bdwb\_ d1hq8a\_ d1fifa1 d1dv8a\_ d3hupa\_ d1wk1a1  
d1umra\_ d2afpa\_ d3bx4a\_ d1gz2a\_ d1sl6a\_ d1v7pb\_ d3g8ka\_ d1ixxa\_  
d1j34a\_ d1jwib\_ d1g1sa1 d1y17a1 d1ja3a\_ d1fvub\_ d3bdwa\_ d1sb2b1  
d1fvua\_ d1umrc\_ d1oz7a\_ d4m17a\_ d3cfwa1 d1ypqa1 d1g1ta1 d3fd4a\_  
d3l9jc\_ d4dn8a1 d1v41b\_ d2msba\_ d4lt9a1 d3tc7a1 d3hoja\_ d1i4na\_  
d3vnda\_ d3n18a1 d1geqa\_ d3nav1 d1v5xa\_ d4a2ra1 d3tc6a1 d1ujpa\_  
d4ijba\_ d1xcfa\_ d1rd5a\_ d1qopa\_ d3b5va\_ d2r80b\_ d1cqxa1 d1cg5a\_  
d1gcvb\_ d3boma\_ d2h8fb\_ d2raoa\_ d3bj1a\_ d4hrrb\_ d2r50a\_ d3d1kb\_  
d2aa1b1 d3zhwa\_ d3hf4b\_ d3gdja\_ d1jebb\_ d3bj1b\_ d1x9fb\_ d1wmub\_  
d1gcva\_ d3bcqb\_ d3d4xb\_ d1gvha1 d2dc3a\_ d3hf4a\_ d4yu3a\_ d3k8ba\_  
d1qpwb\_ d2r80a\_ d3bcqa\_ d1v4wa\_ d3wtgb\_ d1j17a\_ d4esaa\_ d1a9we\_  
d3d1ab\_ d1fsla\_ d4h21a\_ d1v4wb\_ d1mwca\_ d1vhba\_ d1jeba\_ d1spgb\_  
d1h97a\_ d1q1fa\_ d1tu9a1 d3d1aa\_ d1hdsb\_ d3hyub\_ d2zfb\_ d3fs4a\_  
d1oj6a\_ d1shrb\_ d4h21b\_ d4yu3b\_ d1spga\_ d3hrwa\_ d3qqra\_ d3at5a\_  
d4wchd\_ d3hyua\_ d1cg5b\_ d1uc3a\_ d1hbra\_ d2raob\_ d1outb\_ d4esab\_  
d3gdjb\_ d3qqqa\_ d1x9fc\_ d3vrfa\_ d1litha\_ d3mkba\_ d3d4xa\_ d3mjpa\_  
d1j16a\_ d3fh9a\_ d1outa\_ d2dc3b\_ d1lit2a\_ d3eoka\_ d3g46a\_ d1qpwa\_  
d3vrfb\_ d1ch4a\_ d1x9fd\_ d1hdsa\_ d2zfb\_ d3mkbb\_ d1or4a\_ d3wtga\_  
d1a4fa\_ d3fh9b\_ d3bomb\_ d3cy5a\_ d3at5b\_ d1x9fa\_ d2oifa\_ d4lmbx\_  
d1cpcb\_ d3v57a\_ d1kn1a\_ d1cpc\_ d4f0ta\_ d2vjha\_ d4po5b\_ d1eyxa\_

d1alla\_ d4f0tb\_ d1b33b\_ d1b8db\_ d4h0mb\_ d1b33a\_ d2vjhb\_ d4lm6b\_  
d2vmlb\_ d1allb\_ d2vjta\_ d3dbja\_ d2vmla\_ d2vjtb\_ d4f0ub\_ d1f99b\_  
d4rmpa1 d1liaa\_ d1eyxb\_ d2uulb\_ d4lmsb\_ d4f0ua\_ d2bv8a\_ d1f99a\_  
d2bv8b\_ d2c71b\_ d3dbjb\_ d4rmpb1 d1b8da\_ d4h0ma\_ d3v57b\_ d1liab\_  
d2uula\_ d2j96a\_ d1kyqa1 g1gxs.1 g1wht.1 d1mtza\_ d1hlga\_ d2xqfa\_  
d1f6wa\_ d1dx4a\_ d1qe3a\_ d1k4ya\_ d4qwwa\_ d2ha2a\_ d2qvba\_ d2v9za\_  
d4kafa1 d1jmxa4 d1jmxa3 d1pbya4 d1b9ra\_ d1offa\_ d1frra\_ d3wcqa\_  
d1e9ma\_ d1wria\_ d1i7ha\_ d3av8a\_ d1czpa\_ d1rfka\_ d3plma1 d3b2ga\_  
d2bt6a2 d4iuua3 d4bvva\_ d5hpga\_ d3k65a\_ d1ki0a3 d1ki0a2 d1ki0a1  
d1a0ha1 d1pmla\_ d3sp8a3 d2feba1 d1f74a\_ d3l21a\_ d2e1da\_ d1to3a1  
d1w3ia\_ d1sfla\_ d1n7ka\_ d1vcva1 d4imea\_ d1wa3a\_ d2ocza1 d1f2ja\_  
d3m16a\_ d2yxga\_ d1ub3a\_ d3a5fa\_ d1fbaa\_ d1l6wa\_ d1xfba1 d1wx0a1  
d1vpxa1 d1ojxa\_ d1mxsa\_ d2a4aa1 d1xkya1 d3cq0a1 d3s1xa\_ d1f05a\_  
d1fdja\_ d3cpa1 d4d2ja\_ d4mh8a\_ d1mu2a2 d4i7ga1 d3rp2a\_ glucy.1  
d1fuja\_ d2zchp\_ d3w94a\_ d1si5h\_ d1l06a\_ g2pka.1 d1cgha\_ d1kigh\_  
d1a5ia\_ d3s9ba\_ d1hj8a\_ d1ao5a\_ d2anya\_ d1q3xa1 d1gvza\_ d1azza\_  
d4gsoa\_ d2f91a1 d1iaua\_ d1gdna\_ d1eufa\_ g1fiw.1 d1eq9a\_ d4nfea\_  
d2rdla\_ d1spja\_ d1elva1 d1a7sa\_ d1lekbb\_ d1pfxc\_ d1yc0a\_ d2aiqa\_  
g1fiz.1 d1fi8a\_ d4k60a\_ d4dgja\_ d1mzaa\_ d1op0a\_ d3tjva\_ d1pytd\_  
d1sgfg\_ g1gg6.1 d2eeka\_ g1rtf.1 d1a0ja\_ d3g01a\_ d1pytc\_ d4e7na\_  
d1ddja\_ d1z8ga1 d2hlca\_ d1npma\_ d1brup\_ g1jou.1 d1sgfa\_ d1autc\_  
g2hnt.1 g1kdq.1 d3s69a\_ d4crga\_ d1fxya\_ d1bqya\_ d1svpa\_ d1mbma\_  
d3su6a1 d1cula1 d4agka\_ d1vcpa\_ d1q31a\_ g1n11.1 d3e90b\_ d1lep5a\_  
d3uljb\_ d1m41a\_ d2bk7a\_ d3fjua\_ d1z5ra1 d1kwma1 d1jgga1 d2c1ca1  
d1dtda\_ d1h81a2 d4lu0a\_ d1of8a\_ d3unda1 d3e9aa1 d1vr6a2 d1n8fa\_  
d2qkfa\_ d1d9ea\_ d2i49a\_ d1nnfa\_ d1xvxa\_ d1ursa\_ d1h3da1 d1iuda\_  
d4m1va1 d1twya\_ d3e13x\_ d2nxoa1 d4pfua\_ d3ttma\_ d1elja\_ d2qmwa1  
d1us5a\_ d1y3na1 d1jeta\_ d1uqwa\_ d4f19a1 d2esna2 d3thia\_ d3fasa1  
d2uyeb\_ d2xwva1 d1r91a\_ d2fyia1 d1pb7a\_ d2ozza1 d1sw5a\_ d1nh8a1  
d1vr5a1 d2g29a\_ d1xs5a\_ d3lswa\_ d2z23a\_ d3w9va\_ d3tcha\_ d1q35a\_  
d1z7me1 d3q27a\_ d1p99a\_ d1ve4a1 d2i6ea1 d4mcoa1 d4n8ya\_ d1eu8a\_  
d1zbma1 d1hs1a\_ d1ixca2 d1j1na\_ d1xvya\_ d1y9ua\_ d2z22a1 d1xoca1  
d4oera\_ d1wdna\_ d5f1qa1 d1xt8a1 d1i6aa\_ d4gwoa\_ d4igta1 d1pc3a\_  
d4mmpa1 d1o63a\_ d2cz1a1 d2onsa2 d4mija1 d1eh3a\_ d3skpa\_ d1dtza1  
d1dtza2 d1ieja\_ d1jnfa2 d1ce2a1 d1jnfa1 d1b1xa2 d1jw1a1 d1jw1a2  
d1ryoa\_ d1h76a1 d1h76a2 d3q3ma\_ d1za0a1 d1mxra\_ d2inca\_ d1jk0a\_  
d2incb\_ d1mhyb\_ d3hf1b\_ d1mtyb\_ d1r2fa\_ d2uw1a\_ d1mhyd\_ d3n37a\_  
d1oquc\_ d1syya\_ d1mtyd\_ d2o1za\_ d1uzra\_ d1smsa\_ d2fkza\_ d1zujal  
d1s3qa1 d2fjca1 d1z6om1 d1veia\_ d4dyya\_ d1jiga\_ d3gvya\_ d2pyba\_  
d4cy9a1 d3bvfa1 d1r03a\_ d2cf7a\_ d1nf4a\_ d1zs3a1 d4iwka\_ d3ka8a\_  
d3np0x\_ d1n1qa\_ d1l1b3a\_ d4e6ka\_ d1z6oa1 d2fzfa1 d4dyua\_ d3ge4a\_  
d4am4a\_ d2z6ma\_ d1ji5a\_ d1vlga\_ d1l1koa1 d1krqa\_ d3qz3a\_ d1o9ra\_  
d2ffxj\_ d1euma\_ d1yv1a1 d2v2pa\_ d1j30a\_ d4di0a\_ d1dpsa\_ d1oewa\_  
d2qzxa\_ d2asia\_ d1psoe\_ d1miqa\_ d1smra\_ d2h6ta\_ d1pfza\_ d1izda\_

d3hd8a\_ d1j71a\_ d1dpja\_ d4aa9a\_ d1t6ex\_ g1b5f.1 g1lya.1 g1htr.1  
d1qdma2 d1bxoa\_ d1wkra\_ d1tzsa\_ d1libqa\_ d2qzwa\_ d1orva2 d1xfda2  
d1h6ua1 d1bdqa\_ d3ggta\_ d3ixoa\_ d1mrxa\_ d2haha\_ d1tw7a\_ d4njsa\_  
d1sgua\_ d2p3da\_ d1nsoa\_ d3d3ta\_ d2rkfa\_ d1c6ya\_ d2rspa\_ d3ogpa\_  
d3ekwa\_ d2o4na\_ d2j9ja\_ d3ggua\_ d3lzua\_ d4npua\_ d4j55a\_ d2r8na\_  
d2fxda\_ d2p3ca\_ d4dqea\_ d3ttpa\_ d3t3ca\_ d2p3aa\_ d2hc0a\_ d2fdda\_  
d3mwsa\_ d1sr9a2 d1rqba2 d3rcha\_ d3k40a\_ d1pmma\_ d1k8rb\_ d1wgra1  
d1ef5a\_ d1wfy1 d1e8ya3 d1wgya1 d1l1fda\_ d2cs4a1 d1wxma1 d2byea1  
d3kh0a1 d2byfa1 d1wxaa1 d1e7ua3 d1h4ra3 d4y18a1 d2a16a3 d1wgda1  
d1wggal d4q5eb\_ d1wjna1 d1se9a\_ d3n3kb\_ d1wz0a1 d1we6a1 d2m0xa\_  
d2gbka\_ d3rt3b1 d1wh3a1 d1sifa\_ d2ekek2 d4ii2b1 d4hk2a1 d1c3ta\_  
d1m94a\_ d1wgha1 d1ttna1 d1j8ca\_ d1wx8a1 d3v6cb1 d2ma9b\_ d4i6lb1  
d2jvca1 d1iyfa\_ d2k1fa\_ d1wxva1 d1wf9a1 d1t0ya\_ d2io0b2 d1x1ma1  
d2gbma\_ d1zw7a1 d2m17a\_ d1ud7a\_ d1we7a1 d2l1wpa\_ d2gbja\_ d1wjua1  
d1v6ea1 d1v86a1 d4eewa\_ d1w1aa1 d4icva\_ d4gu2a\_ d1wx7a1 d1wy8a1  
d4hjka1 d2faza1 d1v5oa1 d3ruib\_ d1eo6a\_ d3waob\_ d2r2qa1 d3m95a\_  
d3wana\_ d2a13a1 d2cr5a1 d1wj4a1 d1s3sg\_ d1ps9a2 d1o94a2 d1cjca1  
d4wfia\_ d4cg1a1 d3visa\_ d2ftba\_ d1pmpa\_ d2rcqa1 d4lkpa\_ d1sa8a\_  
d1vyfa\_ d1lpja\_ d3vg7a1 d4azqa1 d1o8va\_ d5bvqa\_ d1p6pa\_ d2qo4a\_  
d1opba\_ d1yiva1 d1o1va\_ d4bvma1 d4tkba\_ d4i3ba\_ d1bwya\_ d1ftpa\_  
d1ggla\_ d4gkca\_ d1cbia\_ d3p6da1 d1kqwa\_ d2a0aa1 d1dszb\_ d1a6ya\_  
d3cbba\_ d1ynwa1 d1r4ia\_ d1hcqa\_ d2hana\_ d2hanb\_ d2enva1 d1kb4b\_  
d2n1lb\_ d1lo1a\_ d1cita\_ d1adqa1 d1fnga1 d1uvqb1 d1zs8a1 d2vola1  
d2vola2 d1mfbl2 d2jelh2 d1uwel2 d3qq4b1 d1kjbv\_ d1k5na1 d1osph2  
d4odh12 d1ow0a1 d1ow0a2 d1bfob2 d3l9ra2 d3jtth1 d2fath2 d4elkb2  
d1fn4b2 d2xfxb\_ d1pg7x2 d1cqka\_ d4k71b2 d1lk2a1 d1leapb2 d4lfhg2  
d1i4fa1 d2nw2a2 d1kfah2 d1mhca1 d1h3ua1 d1wejh2 d1h0db2 d1a5fh2  
d1kcvh2 d1mjuh2 d1qqda1 d1kcrh2 d1k8ia1 d3huja2 d2nnab1 d1nfd2  
d3mffb2 d1s9va1 d1lk3h2 d1q0xl2 d1fv1b1 d1neza1 d4rfeb2 d1r3ha1  
d1a6tb2 d1kjva1 d1pz5b2 d1onqa1 d2bc4a2 d1de4a1 d1k8da1 d1tcra2  
d1dn0b2 d1nfde2 d2xwtb2 d1bfoa2 d1mexh2 d1iakb1 d1ypzf2 d4f7ea2  
d1q72l2 d2fbjh2 d1fe8h2 d1clzh2 d1fngb1 d1uvqa1 d1vgka1 d1c16a1  
d4j12a2 d4x99b2 d1igtb3 d1je6a1 d1q72h2 d1nldh2 d1teth2 d2hmic2  
d1i1ca2 d1i1ca1 d1q0yh2 d1kfa12 d3frua1 d1pg7w2 d1u58a1 d1igyb4  
d1igyb3 d1hyrc1 d1klub1 d1deeb2 d1c12b2 d2bc4b2 d2ig2h2 d1kcvl2  
d3wn5b1 d1lk2b\_ d1lk3l2 d1mjul2 d1sm3h2 d1q0xh2 d1zvsal d1ydpal  
d1u8ib2 d1ypze2 d1kcuh2 d2e3fa\_ d1mm0a\_ d2e3ea\_ d2l1da\_ d2ny8x\_  
d2e3ga\_ d2ny9x\_ d2nz3a\_ d2l1j7a\_ d1n4na\_ d2m8bb1 d2kyqa\_ d3psma\_  
d1jkza\_ d1jxca\_ d2g1la\_ d1ugla\_ d4uj0a\_ d2k4ua\_ d1hp2a\_ d2lu9a\_  
d1baha\_ d2meoa1 d1wm7a\_ d1hlya\_ d1n8ma\_ d1jlza\_ d1wpda\_ d1c55a\_  
d1pvza\_ d1wt7a\_ d1rjia\_ d1wz5a\_ d1m2sa\_ d1pjva\_ d1c49a\_ d1qkya\_  
d2ktca1 d1wmta\_ d1du9a\_ d1j5ja\_ d1r1ga\_ d1c4qa\_ d1prtc1 d2wv6d\_  
d1prtf\_ d1l1trd\_ d4l63b1 d1r4pb\_ d1prtd\_ d1t10f\_ d2bosa\_ d1prtb1  
d1t0za\_ d2i61a\_ d1t1ta\_ d1sn4a\_ d1kv0a\_ d2lkba\_ d1npia\_ d1wwna\_

d1pe4a\_ d2kbka\_ d2li7a\_ d1djta\_ d2kbha\_ d1dq7a\_ d1sega\_ d1zywa1  
d1jzaa\_ d1dy2a\_ d1t61c1 d1y14b1 d2nn6i1 d1i94l\_ d2zjra2 d1smxa\_  
d2qamc2 d1hh2p1 d2r7da1 d1r12a2 d1wfaq1 d3bzka4 d1x6oa2 d3a0ja\_  
d2j01d2 d2ja9a1 d4q15a\_ d1hr0w\_ d1luza\_ d2n3sa\_ d2vnud1 d1h95a\_  
d1go3e1 d2nn6h1 d1ne3a\_ d2mo1a\_ d1liz6a2 d1jjga\_ d1e3pa2 d2ix0a3  
d2ix0a2 d2lxja\_ d1ueba3 d1ueba2 d2z0sa1 d1u0la1 d2ix0a1 d2eifa2  
d2je6i1 d3i2za1 d2c35b1 d2ahob2 d1t9ha1 d3i4oa\_ d2qall1 d1jt8a\_  
d2nn6g1 d1g6pa\_ d3cama\_ d1i94q\_ d1c9oa\_ d1d7qa\_ d2ba0a1 d2vnud2  
d2vnud3 d1khia2 d2qalq1 d1wi5a1 d1xtda2 d1ny4a\_ d1dzka\_ d4tlja\_  
d2a2ua\_ d4wfva\_ d3t1da\_ d4iaxa\_ d3zq3a\_ d2nnda\_ d1i4ua\_ d1kxoa\_  
d1bbpa\_ d1kt7a\_ d1exsa\_ d3s26a1 d1lf7a\_ d4gh7a\_ d1z24a1 d1qabe\_  
d1xkia\_ d1ew3a\_ d3bx7a\_ d4iawa1 d1n0sa\_ d1gkab\_ d3kzaa\_ d2k23a\_  
d2l9ca1 d2joza1 d1gm6a\_ d3kffa\_ d3saoa1 d1e5pa\_ d1yupa1 d1iia\_  
d1rpma\_ d2shpa1 d1yfoa\_ d1l8ka\_ d2ooqa1 d1g4us2 d1p15a\_ d1lara2  
d1lara1 d1wcha\_ d2fh7a2 d2fh7a1 d1ohea1 d2f4da\_ d1rxda\_ d2hxpa\_  
d1xria\_ d1d5ra2 d1fpza\_ d3ezza\_ d4y2ea\_ d1i9sa\_ d3azya\_ d3wvja\_  
d1upsa1 d1ajoa\_ d2hyka\_ d1ajka\_ d2vy0a\_ d1o4ya\_ d3o5sa\_ d3d6ea\_  
d3atga\_ d1dypa\_ d1lumza\_ d3i4ia\_ d1c1la\_ d4lbqa\_ d1a78a\_ d1slta\_  
d4no4a\_ d3zsja\_ d3duia\_ d1g86a\_ d1is3a\_ d1qmja\_ d1hlca\_ g1qmo.1  
g1len.1 d3zyra\_ d1fnya\_ d1n47a\_ g2ltn.1 d1avba\_ d3usua\_ d1dhkb\_  
d1f9ka\_ d1lukga\_ d1g8wa\_ d1g9fa\_ d1wbfa\_ d3wcsa\_ d1g7ya\_ g1loe.1  
d1mvqa\_ d1hq1a\_ d1v6ia\_ d1dbna\_ d1qnwa\_ d1fx5a\_ d4l8qa\_ d1ioaa\_  
d3n35a\_ d3ubra\_ d1qo8a1 d1d4ca1 d2k3va\_ d1ft5a\_ d1qdba\_ d1m1qa\_  
d2j7aa\_ d1h21a\_ d1ogyb\_ d4fasa\_ d1jnia\_ d1oaha\_ d1sp3a\_ d3h33a\_  
d1rwja\_ d19hca\_ d1os6a\_ d3bxua\_ d3h4na\_ d1i77a\_ d3caoa\_ d1j0pa\_  
d2ctha\_ d1duwa\_ d2e84a\_ d1hh5a\_ d1gyoa\_ d3h34a\_ d1wioa4 d1ccza2  
d1vcaa1 d1dr9a2 d2d9qb1 d2nxyb2 d2dara2 d2dara1 d1wyha2 d2dloa2  
d1rutx4 d1rutx3 d2cuqa2 d1x4la2 d1x4la1 d1x3ha2 d1x3ha1 d2d8za1  
d1x61a2 d1x6aa1 d1x6aa2 d2cora2 d2cora1 d1v6ga1 d1v6ga2 d2d8za2  
d1x64a1 d1x64a2 d1b8ta1 d2co8a1 d1x63a2 d2dj7a2 d2dj7a1 d2cu8a2  
d2cu8a1 d1g47a2 d1g47a1 d1j2oa1 d1wyha1 d2dloa1 d1wiga1 d1wiga2  
d2cupa2 d2cupa3 d1x68a1 d2d8ya2 d2d8ya1 d1x62a1 d1x68a2 d1x61a1  
d1b8ta3 d1b8ta2 d2d8xa2 d2d8xa1 d1x4ka1 d1x4ka2 d2cuqa1 d1m3va1  
d2co8a2 d1j2oa2 d1x63a1 d2cura1 d2cura2 d1x62a2 d1op9a\_ d1y0la1  
d1letzb1 d1egj11 d2gsib1 d1nj9a1 d4jfh1 d1aqk11 d1t2ja\_ d1lo4h1  
d1zvya1 d3v4v11 d4enec1 d1kxtb\_ d5e8ea1 d2pxya\_ d4weud\_ d1xiwc\_  
d2esvd1 d1qznh\_ d1ogae1 d1f4xh1 d4n1hb\_ d3ezjb1 d3mlw11 d1kfah1  
d1letza1 d1b4jh1 d3cfic\_ d4w68a\_ d2arja1 d1ek3a\_ d2ok011 d1vera\_  
d1uwgh1 d1blnb1 d1fpth1 d1rzga1 d2giya1 d4m3kb1 d1nc2a1 d2nyyd1  
d1ncna\_ d1fbih1 d5dxwa\_ d4fqqa1 d1dqdh1 d1jfq11 d1kelh1 d1faih1  
d1frgl1 d1figl1 d4m6n11 d1fo0a\_ d4hxb11 d3b5ga\_ d3quyd1 d2h9gb1  
d1i8kb\_ d2dd8h1 d2ck0h1 d1eaja\_ d4w6wb1 d2a6ib3 d1t66d1 d2e27h\_  
d1ob1b1 d1f11b1 d2v7na1 d1ad0a1 d2xt1b1 d1pskh1 d4i13b1 d2op411  
d1a0q11 d1uwell d1za3a1 d1ncb11 d4uu9a\_ d1bm3h1 d1cloh1 d1nqba2

d1cf8h1 d4y5va\_ d1mhph1 d5anma1 d4cdgc1 d4ldeb\_ d1y01b1 d2pcpb1  
d1z3gl1 d1dfb11 d1fh5h1 d3g5xa1 d1tzib1 d4dn3l1 d3zhka1 d2b1hh1  
d2uyla1 d1f3dh1 d1nj9b1 d2agjh1 d2h1p11 d1q72h1 d8fabb1 d1ndmb1  
d1rjca1 d4u6hb1 d3upca\_ d2fbj11 d1osph1 d1tvda\_ d2cjvh\_ d4fhbd1  
d1bd2d1 d1rz7h1 d3nn8a\_ d1blna1 d1knoa1 d1nfda1 d2bmkb1 d1dq11\_  
d1igyb1 d1igf11 d12e8h1 d3utza1 d1nc2b1 d1rihh1 d4mwfb1 d4jvpa1  
d1mieh1 d1rhfa1 d1fgn11 d1sbsh1 d1lp9e1 d1dn0a1 d4lqf11 d1iaih1  
d1kgcd1 d1mh5b1 d1gpol1 d2g60h3 d1f8t11 d2jixd1 d4grwh\_ d1fo0b\_  
d1bfob1 d1axsa1 d1u9ka\_ d1nmbh\_ d1h8na1 d1h8na2 d1jguh1 d4eura1  
d3sdy11 d35c8h1 d1w7211 d1mvub\_ d1i9rh1 d1ob1a1 d4wenb\_ d1yeeh1  
d3ietc1 d1f58h1 d1ad0b1 d1mqk1\_ d1nbvh1 d4b50a\_ d3r8bb\_ d1baf11  
d1mamh1 d4rgne1 d2gsgb\_ d35c811 d1bafh1 d1ailh1 d2pcpa1 d2fath1  
d2x1pa\_ d1orsb1 d1ibgl1 d1shma\_ d1a2yb\_ d1u0qa\_ d2coqa\_ d1hilb1  
d1qfwi\_ d1jv5b\_ d1fn4b1 d5e0qa\_ d1nsnh1 d1plgl1 d4ocx11 d1kb5h1  
d1rzhf1 d1pg7x1 d2fx7h1 d2oi9c\_ d1l7i11 d3eyva1 d1d5i11 d4ffyl\_  
d1tet11 d1a6wh\_ d1ac6a\_ d3dvfa\_ d1nfde1 d1mimh1 d1ri8a1 d1jhlh\_  
d3dura\_ d1fskb1 d1f97a1 d3so3b1 d2ak4d1 d1lp9f1 d4z7wf1 d1l7th1  
d4y5ya\_ d4x7ec1 d1emth1 d1likf11 d1nlbh1 d4utal1 d1bjma1 d1leapb1  
d1u6ah1 d2dtgd1 d1kj2b\_ d1xeda1 d1cleh1 d1fgvh\_ d2bnub1 d2fb4h1  
d2dtgb1 d1ktrh\_ d1jpth1 d1qkz11 d4hepg\_ d2atpb1 d1flrh1 d2hrp11  
d1mvfa\_ d1iaim1 d3k80a1 d2jb5h1 d3zkxc\_ d4grwe\_ d1it9h1 d1rhhb1  
d3w9ec\_ d1e4wh1 d1sy6h1 d2j6eh1 d3qxta\_ d1jglh1 d1p7ka1 d1tzhb1  
d4n8pa1 d1gaf11 d2jelh1 d1wioa2 d4i0cc1 d1cicb1 d1lmka2 d1lmka1  
d1iqwh1 d1orqb1 d1ejoh1 d1jnlh1 d4zga\_ d43c9b\_ d1ggbl1 d1wejh1  
d3q6fa1 d1f3dj1 d3c6la1 d1bqlh1 d3p9wb\_ d1a3r11 d1h0db1 d2uzil\_  
d1eo811 d1qfwl\_ d1n7ml1 d1igja1 d1c5ch1 d2a9mh\_ d1rmfh1 d1fj1b1  
d4heme\_ d1ccza1 d1a5fh1 d1ogad1 d1dlfh\_ d1qa9b\_ d1vgel1 d3qskb\_  
d1sjxa\_ d4ozfg1 d1sq2n\_ d1qd0a\_ d1kcvh1 d1c5db1 d3qcull1 d3bn9d1  
d1mjuh1 d4y8dc\_ d7fabh1 d3dvgb1 d1lo011 d1a6tb1 d1gigh1 d1kcrh1  
d2hwhz11 d1yjdc1 d3clfl1 d4krna\_ d1d171\_ d1e6o11 d1mexh1 d3r0ma\_  
d4kkna\_ d1fnsl1 d1loaqh\_ d1rzia1 d1lucbh1 d1ncw11 d4b41a\_ d1nfdfl1  
d2mpah1 d2d7t11 d4grwf\_ d4b5ea\_ d1lk3h1 d3u79a\_ d4u3xa\_ d1ghfl1  
d1bvkb\_ d1mcww1 d1b88a\_ d1jrhh1 d32c2b1 d4wemb\_ d1dsfh\_ d1op3h1  
d1ce111 d1liqda1 d1qoka1 d1qoka2 d1qfuh1 d2crya1 d1ay1h1 d1loaql\_  
d3ab0b\_ d1rur11 d1t4kb1 d1bz7b1 d1n0xh1 d1for11 d1lucbl1 d4w6yb\_  
d43c9a\_ d2aab11 d1tzia1 d4n1ca\_ d1k6qh1 d3g9ab\_ d4tvsa1 d1ligmh\_  
d1pz5b1 d3dx9a1 d3wxwh\_ d1nakh1 d1kcul1 d3eaka\_ d4qlra1 d1cr911  
d1d9ka\_ d1f4x11 d1deea1 d2i27n2 d1c12a1 d2orb11 d1j8hd1 d1mcph1  
d1c5da1 d1kenh1 d1bd2e1 d1h5ba\_ d4x7fc1 d3upaa\_ d1t3fa1 d1indh1  
d2dtgc1 d4hc111 d1zv5a1 d4wgvb\_ d1luwg11 d4f37k1 d1aqkh1 d1vesa\_  
d3zkqd\_ d1fpt11 d1lo411 d1knob1 d3rrqa\_ d1ct8b1 d4orz\_ d1mlbb1  
d4hgkc1 d1dqdl1 d1bogb1 d4ozhe1 d1dr9a1 d1i7za1 d1dn0b1 d1kell1  
d1rzi11 d1ypzf1 d1wtla\_ d1hkfa\_ d1fail1 d1figh1 d2vyre\_ d1sjva\_  
d1ohqa\_ d1bfoa1 d1pkqb1 d1mjul1 d1b4j11 d1nsn11 d2arjb1 d1p4bh\_

d4aj0a\_ d3nn8b\_ d2rcja1 d1f2xk\_ d4v1dd\_ d1adqh1 d2eksa\_ d4k3ga\_  
d1jfqh1 d1luweh1 d1frgh1 d4gftb\_ d1uz8b1 d4nlea\_ d1bm3l1 d1clol1  
d3mcka1 d2vq1a1 d1ae6h1 d4aq1b1 d1uj3b1 d1nbqa1 d1fh5l1 d2ck0l1  
d2ywza\_ d1q72l1 d4nbxb\_ d1hila1 d4hzb1 d2j88l1 d1zmya1 d1cd0a\_  
d1a4ka1 d1pskl1 d1a0qh1 d4krmb\_ d1ncbh1 d2fbjh1 d1j8he1 d1i3ua\_  
d1cf8l1 d1fe8h1 d2p1ya1 d1eeqa\_ d2x89a\_ d1ol0a\_ d2r0lh1 d1ub5a1  
d1dfbh1 d3eyvb1 d4jdvb1 d4p2cg\_ d2gsia1 d2agj11 d1u3ha1 d2h1ph1  
d1rihl1 d1fskc1 d1boga1 d2a77l1 d1osp11 d1qfoa\_ d3dwta\_ d2fx7l1  
d1rz7l1 d3stba1 d1pkqa1 d1b6da1 d1dzba2 d1dzba1 d1kj2a\_ d4l1ha\_  
d1rzgb1 d1dq1h\_ d12e8l1 d1mie11 d1jmaa\_ d1sbs11 d1fgnh1 d1f58l1  
d1mqkh\_ d1ndgb1 d3qeg11 d1iail1 d2aw2a1 d1tqbc1 d3fo2a1 d4dkaa\_  
d1f8th1 d2g60l1 d2ywya\_ d1uj3a1 d1yc7a\_ d3bd3a\_ d4w6xb1 d1nmb1\_  
d1i8ka\_ d1rjlb1 d1ypze1 d1p7kb1 d1kxqe\_ d1gpoh1 d2z4qa1 d1w72h1  
d1i9rl1 d4qgya1 d4xt1c\_ d2qqnh1 d1cica1 d3c08h1 d2cd0a\_ d2bdnh1  
d1hnga1 d1mam11 d1nldh1 d1cr9h1 d4lcih1 d3bkyh1 d3qg7l1 d1ai111  
d1kxvc\_ d4iosd\_ d1l7ih1 d2x1qa\_ d1ub6b1 d3k74b\_ d1libgh1 d1teth1  
d1igy1 d1hxma1 d2x6ma\_ d2e71a\_ d5e03a\_ d1qfwm\_ d2r0kh1 d1igjb1  
d1rurh1 d1plgh1 d1mj8h1 d1yuhb1 d3fmg11 d1rzfl1 d1emt11 d1ad9b1  
d1igtb1 d1nbl11 d1d5ih1 d3k7ua\_ d4ffyh\_ d1bwwa\_ d3dvga1 d1a6ta1  
d1fgvl\_ d4qxgl1 d1mim11 d1jh11\_ d2hffb1 d2hh0l1 d1qkzh1 d1l7t11  
d1afvh1 d1iaii1 d2cjuh\_ d1um5h1 d2ghwb2 d2ghwb1 d1kgce1 d2fgwh1  
d1likfh1 d1dvfd\_ d2i24n1 d2xtjb\_ d1za3b1 d2yc1a\_ d2hh0h1 d2x1oa\_  
d1bvka\_ d1rjla1 d5e7ba1 d1igta1 d1il1b1 d2fb4l1 d1mvua\_ d1jpt11  
d32c2a1 d1fvca\_ d1iqdb1 d2hrph1 d2p4ab\_ d4qo1a\_ d1p2cb1 d1wt5c\_  
d1t4ka1 d5c1mb\_ d1it9l1 d1bz7a1 d1b2wh1 d1e4wl1 d1jnl11 d1yedb1  
d1za6b1 d3u7aa\_ d1igfh1 d3gnml1 d1orsa1 d1wejl1 d1a2ya\_ d1hxmb1  
d1gafh1 d2j4wh1 d1pz5a1 d1j05a\_ d1a3rh1 d4fq111 d1qfwh\_ d1eo8h1  
d1n7mh1 d4s11a\_ d1kegh1 d5da4a\_ d1iqwl1 d3whxb1 d1vgeh1 d1deeb1  
d1c12b1 d1t2ql1 d1ad9a1 d3gsnb1 d3b2uc1 d1ggbh1 d1t3fb1 d1nak11  
d4ocmc\_ d1lila1 d2v7hb3 d2esve1 d1mcoh1 d2qr0b1 d2q3aa\_ d1ct8a1  
d1kcr11 d2pxyb\_ d2uzih\_ d5c3ld\_ d3durb\_ d1c5cl1 d2ak4e1 d1dl7h\_  
d1xiwd\_ d1mlba1 d1rmfl1 d1i7zb1 d1dlfl\_ d2xa3a\_ d5bq7b1 d1dqqb1  
d3h42l1 d1egjh1 d1kcv11 d1fe8l1 d2j6e11 d1f3rb2 d1lk3l1 d1sm3h1  
d1q0xh1 d1ghfh1 d7fab11 d1igch1 d1lo0h1 d4idla\_ d5c2bl\_ d1jrh11  
d1lilla1 d3zhda1 d4kfcz\_ d1b0wa\_ d1e6oh1 d1mex11 d4krpb\_ d1fnsh1  
d1ncwh1 d4hgma\_ d4eigb1 d4rzca\_ d2mpa11 d4y5xa\_ d5en2b1 d3lrga1  
d4ej1c1 d1rhha1 d1j05b\_ d1forh1 d1q9wb1 d2wzpd\_ d2aq2a1 d1h0da1  
d3revb1 d2ij0c1 d1tzha1 d4m7j11 d1k6ql1 d3b9kc1 d1igml\_ d3qeua1  
d1dsfl\_ d1ce1h1 d1kcuh1 d1zvha1 d1zvoa1 d1tqbb1 d1ay111 d2qsc11  
d2cgrh1 d1nl0h1 d1ken11 d3eo0a1 d4n9ob1 d1n0xl1 d3k1kc\_ d2m9wa1  
d3dfxa\_ d2aq2b1 d1enf1 d1i4pa1 d1v1oa1 d1et9a1 d1esfa1 d2g9hd1  
d4ohja1 d1klud1 d1bxta1 d1eu3a1 d1ty0a1 d1fnua1 d2cqva1 d1fhga\_  
d2k1ma\_ d2dl2a1 d1biha3 d1biha1 d1biha4 d3qp3a1 d1glca\_ d1gxea\_  
d1cvsc2 d1cvsc1 d1xmwa2 d1m4ka2 d2otpa2 d1biha2 d1rhfa2 d2fcba2

d2fcba1 d1wwbx\_ dlgsma2 dlepfa1 dlepfa2 d2dava1 dlwaaa\_ d1f97a2  
d1x44a1 d1vcaa2 d1fnla2 d1fnla1 d3b5ha2 d3h8na2 d3h8na1 d1jbja1  
d1jbja2 d1pd6a\_ d1f2qa2 d1f2qa1 d3cx2a\_ d1nbqa2 d3b5ha1 d1n26a1  
d1xiwb\_ d1xaua\_ d1fltx\_ d2ifga1 d1olla1 d1olla2 d1cs6a4 d1cs6a3  
d1cs6a2 d1cs6a1 d2gw5a2 d1sy6a1 d1xiwa\_ dlucta2 dlucta1 dlry7b2  
d1gl4b\_ d1qz1a3 d1olza1 d2c9aa1 d1wwca\_

**Family-62 (c.37.1.11)**

**Positive dataset contains 20 protein sequences.**

d3gqba2 d1xp8a1 d1tf7a2 d1tf7a1 d1ye8a1 d2qe7d2 d4blta\_ d4huta\_  
d3ltaa2 d4hyya\_ d2i3ba1 d3j9tb2 d3ntua2 d1vdza1 d2z43a\_ d1e9ra\_  
d3ziaa2 d3ziad2 d3j9ta2 d3gqbb2

**Negative dataset contains 3635 protein sequences.**

d1xfda2 d1ax4a\_ d1c7ga\_ d2v1pa1 d2ez1a\_ d1u08a\_ d1lc5a\_ d1b5pa\_  
d2ay1a\_ d1bw0a\_ d3pd6a\_ d7aata\_ d2csta\_ d1j32a\_ d1fg7a\_ d4wlha\_  
d1o4sa\_ d1v2da\_ d1gdea\_ d1m6sa\_ d1v72a1 d1svva\_ d1ajsa\_ d1wsta1  
d2f8ja2 d1lk9a\_ d1vp4a1 d1xi9a1 d2gb3a1 d3rcha\_ d3k40a\_ d1pmma\_  
d2cfba1 d1dfoa\_ d1o69a\_ d1bj4a\_ d3k28a\_ d2bwpa\_ d3lg0a\_ d2fnua\_  
d3ou5a\_ d1z7da1 d1b9ha\_ d1iaya\_ d4msoa\_ d1bs0a\_ d1s0aa\_ d1sffa\_  
d3tqxa\_ d1mdoa\_ d3qboa\_ d3pgya\_ d2dkja\_ d1ejia\_ d1vefa1 d4wxga\_  
d3bs8a\_ d3gbxa1 d1w23a\_ d1h6ua2 d1i26a\_ d1e57b\_ d1auyb\_ d1f56a\_  
d1bypa\_ d1azca\_ d1ws8a\_ d3u25a\_ d1cuoa\_ d1id2a\_ d1rkra\_ d2iaac\_  
d4dp1x\_ d1nwpa\_ d2gima\_ d2i7sa\_ d1qhqa\_ d3ehbb1 d1fftb1 d1hfua2  
d1kbva1 d1kbva2 d1sdda1 d1sdda2 d1gyca1 d1gyca2 d1mzya1 d2bw4a1  
d1aoza1 d1aoza3 d1aoza2 d1kyaa2 d1kyaa3 d1kyaa1 d1mzya2 d4e9sa1  
d1sddb1 d1sddb2 d1hfua1 d1hfua3 d1oela2 d1oela1 d1v10a2 d1v10a3  
d1v10a1 d1novc\_ d2bbvc\_ g1gk9.1 g1or0.1 g1e3a.1 d1a3qa1 d1iknc\_  
d3brda1 d1oy3c\_ d1imhc1 d1gjia1 d1zk9a1 d2cxka1 d2bema\_ d1pama1  
d1ea9c1 d1qhoa1 d2fhfa2 d2fhfa1 d1k3ia1 d1j0ha1 d1csla1 d2bhua1  
d1edqa1 d1f1sa2 d1ut9a2 d1gvia1 d1txka1 d2phla2 d2phla1 d1fxza2  
d1fxza1 d1lrha\_ d1uija1 g1dgw.1 d2v09a\_ d1uika2 d1uika1 d1ogpa1  
d1ds6b\_ d1fstb\_ d1g0da1 d3us3a3 d3us3a1 d4mh8a\_ d1mu2a2 d4i7ga1  
d1k9ua\_ d2opoa\_ d1r0ka3 d1vkoa2 d1vm6a2 d3qvsa2 d1gr0a2 d1p1ja2  
d2ovga\_ d1sq8a\_ d1rzsa\_ d3kz3a\_ d3orca\_ d3gpdg2 d2q49a2 d1hdgo2  
d2g17a2 d2cvoa2 d2czca1 d3pwka2 d1obfo2 d1i32a2 d1zyao2 d2pkqo2  
d1b7go2 d2hjsa2 d1cf2o2 d1vkna2 d1nvmb2 d1ux8a\_ d1dlya\_ d4i0va\_  
d2bkma\_ d2bmma\_ d2msya\_ d2djoa1 d2r5za\_ d1au7a1 d1f43a\_ d2lmda1  
d1akhb\_ d1s7ea1 d3nara\_ d1zq3p1 d2craa1 d1mija\_ d4uuta\_ d3a01a\_  
d1x58a1 d3rkqa1 d3cmya1 d2cqxa1 d2da6a1 d1e3oc1 d1fjla\_ d1mh3a1  
d1ig7a\_ d1x41a1 d1wh7a1 d1gt0c1 d2mw8a\_ d1x2ma1 d1b72a\_ d1wi3a1  
d1jgga\_ d1wjha1 d1x2na1 d1mnm\_ d2cuea1 d3k2aa\_ d2hosa\_ d2jwta2  
d1pufa\_ d1octic1 d2hi3a\_ d1b8ia\_ d4j19a\_ d3lnqa\_ d1wh5a1 d1b8ib\_  
d1fexa\_ d2cqra1 d1guua\_ d1ug2a1 d2cqqa1 d2ajea1 d4a69c\_ d1h8ac1  
d2crga1 d2iw5b1 d1xc5a1 d2cu7a1 d1wgxa1 d2cjja1 d2ckxa1 d1gvda\_  
d1xg1a1 d1hlva1 d1hlva2 d1iufa2 d1igna2 d2iu5a1 d1zk8a1 d2g7sa1

d2fd5a1 d2np5a1 d1z0xa1 d2id6a1 d2d6ya1 d2i10a1 d1vi0a1 d2oi8a1  
d3c07a1 d2ns7a1 d2fq4a1 d2yvea1 d1t33a1 d2o7ta1 d2np3b1 d2g7ga1  
d2gena1 d2fbqa1 d2g7la1 d2gfna1 d2g3ba1 d2jj7a1 d2hyja1 d1sgma1  
d1ui5a1 d2hkua1 d2id3a1 d4jyka1 d1b10a1 d1b10a2 d1d5ya2 d1vava\_  
d1luaia\_ d1k8ka2 d1k8ka1 d3uleb1 d3i33a2 d3i33a1 d1bupa1 d1dkgd2  
d1dkgd1 d4ci6a2 d1jcfa1 d4a2ba2 d2fxua1 d1yaga2 d1yaga1 d4cbua2  
d1bupa2 d3vrda1 d3vrda2 d1fcdc2 d1fcdc1 d1h1oa1 d1m70a2 d1m70a1  
d1liqca2 d1liqca1 d1eb7a1 d1nmla2 d1nmla1 d1nira1 d1qksa1 d3h1jd1  
d1hroa\_ d4gedb\_ d3zooa\_ d1mz4a\_ d1gu2a\_ d1f1fa\_ d1dvva\_ d1c6ra\_  
d1c75a\_ d1e29a\_ d1gdva\_ d1cnoa\_ d1h32b\_ d2bh4x\_ d2aiua\_ d5cytr\_  
d1jdl\_ d1i8oa\_ d2zboa\_ d3dmia\_ d1ls9a\_ d1wvec\_ d2yk3a\_ d3ph2b\_  
d1dw0a\_ d5aura\_ d1ql3a\_ d1qn2a\_ d1f1ca\_ d4zzva\_ d2xspa\_ dleg1a\_  
d4v20a\_ d1ojja\_ d4ipma1 d1gpia\_ d4csia\_ d3pfza\_ d3ovwa\_ d2yoka\_  
d2nqya\_ d1hixa\_ d1oa2a\_ d1olra\_ d3b7ma\_ d4h7ma1 d3wp3a\_ d2vgda\_  
d1igoa\_ d3zsea\_ d2nlra\_ d3wx5a\_ d1oa3a\_ d1pvxa\_ d1m4wa\_ d1f5ja\_  
d1oa4a\_ d1ks5a\_ d4ixla1 d1h32a1 d1evsa\_ d1cnt1\_ d1pvhb\_ d1z7ca\_  
d1huwa\_ d1bgea\_ d1rhga\_ d1f6fa\_ d1f45b\_ d1ilrb\_ d1axia\_ dletea\_  
d3tgxb\_ d1scfa\_ d2z3qa1 d3qbl\_ d1hula\_ d4nkqb\_ dleera\_ d1v7mv\_  
d5e4ea\_ d2o27a\_ d3b5ka\_ d2psma1 d4zf7a\_ d3uf5a\_ d4dnxa2 d1m8pa2  
d1g8fa2 d1jhda2 d1x6va2 d3rbaa\_ d2qtra\_ d1nupa\_ d3l92a\_ d1f9aa\_  
d1qjca\_ d2h29a\_ d1vlha\_ d1od6a\_ d1lw7a1 d4ruka\_ d3wdpp1 d3wq5a\_  
d1gnxa\_ d4gxp\_ d4hz8a\_ d1e4mm\_ d3aiua\_ d1wcca1 d1qvba\_ d3ahxa\_  
d1v02a\_ d2dgaa\_ d1pbga\_ d1vffa1 d1qoxa\_ d4ha4a\_ d2el7a\_ d1iq0a2  
d1irxa2 d1r6ta2 d1ivsa4 d2cyba\_ d1rqga2 d1j09a2 d2yxna\_ d1f7ua2  
d1ffya3 d2g36a1 d1nzja\_ d1jila\_ d1n3la\_ d1i6la\_ d1pfva2 d1h3na3  
d3n9ia\_ d3sz3a1 d3sw2a\_ d1moxc\_ d1dx5i3 d1edmb\_ d1autl2 d1autl1  
d1nqlb\_ d1dval1 d1szba2 d1kigl\_ d2y5fl\_ d1ijqa2 d1gk5a\_ d1g1sa2  
d1nt0a3 d1xdtr\_ d1lmja2 d1lmja1 d1nzia2 d2wphe\_ d1klil\_ d1pfxl2  
d1pfxl1 d1p9ja\_ d1g1ta2 d1f7ea\_ d4yzub\_ d1qx2a\_ d1ig5a\_ d2y5ia\_  
d1qlsa\_ d1psra\_ d3n22a\_ d2egda\_ d4ggfc\_ d2wcea\_ d2luca\_ d4aqia\_  
d3nsia\_ d2lp3a\_ d1j55a\_ d1a4pa\_ d1k8ua\_ d1nsha\_ d1pvaa\_ d3fs7a\_  
d2pvba\_ d1ttxa\_ d1rwya\_ d2kyfa\_ d1rk9a\_ d1a75a\_ d1lexra\_ d1tiza1  
d1nyaa\_ d1g8ia\_ d1ggwa\_ d1wdcc\_ d3fwba\_ d1ggza\_ d2o5ga\_ d1ctaa\_  
d1m45a\_ d3i5gc\_ d1sl8a\_ d1fpwa\_ d2scpa\_ d2roaa\_ d4aqra\_ d3pn7b\_  
d1br1b\_ d1s6ca\_ d1bjfa\_ d2obha\_ d1jfk\_ d1jfk\_ d1jfk\_ d1qv0a\_ d1lkja\_  
d2mlfc\_ d2m97a\_ d2d8na\_ d4by5a\_ d1jbaa\_ d4nqga\_ d1wdcb\_ d2mysc\_  
d1j7qa\_ d1s6ia\_ d1uhka2 d1r2ua\_ d1dtla\_ d3kf9a\_ d3pn7c\_ d5d67d\_  
d1tuza\_ d1h8ba\_ d1eg3a1 d2zkmx1 d1snla\_ d1gjya\_ d1y1xa\_ d1hqva\_  
d1dvia\_ d1df0a1 d1qxp\_ d4usla\_ d1k94a\_ d1wkya2 d1uuqa\_ d3wh9a\_  
d4m1ra\_ d1xyza\_ d4xuya\_ d2je8a5 d4bf7a1 d3cuia\_ d1ur4a\_ d1qw9a2  
d1odza\_ d2vzsa5 d1bqca\_ d2x2ya1 d1hjqa\_ d1qnra\_ d4y7ea1 d1vjza\_  
d4k68a\_ d2v3ga\_ d4hpga\_ d1nq6a\_ d1h4pa\_ d1aq0a\_ d3ziza\_ d4bs0a\_  
d1ecea\_ d1h1na\_ d1ta3b\_ d1w91a2 d1ilwa\_ d1uhva2 d1us3a2 d1egza\_  
d7a3ha\_ d1tvna1 d3nyda1 d1ghsa\_ d2cyga1 d4xv0a\_ d2c8na2 d1w32a\_



d3emca\_ d1v6ya1 d1foba\_ d2uwfa1 d2fgla\_ d3niya1 d2c0ha1 d1rh9a1  
d1yq2a5 d1szna2 d1fa2a\_ d1pama4 d5do8a1 d1ea9c3 d2fhfa5 d1qhoa4  
d1avaa2 d1m53a2 d4m8ua1 d2gjpa2 d1lwha2 d4howa1 d1ktba2 d1j0ha3  
d3vm5a1 d2x1ia\_ d1wzaa2 d1uasa2 d2diea1 d1mxga2 d1ht6a2 d1eswa\_  
d1iv8a2 d5cpsa\_ d1ud2a2 d1zjaa1 d3gbea1 d1kwga2 d1wdpa\_ d1gcya2  
d1g5aa2 d1hvxa2 d3dhpa2 d2bhua3 d4do4a1 d3qgva1 d1e43a2 d1g94a2  
d2d3na2 d1gjwa2 d1gvia3 d1x1na1 d1r7aa2 d1tz7a1 d2x42a1 d1tr9a1  
d3abza1 d4toqa\_ d1wb0a1 d1w9pa1 d1eoka\_ d1itxa1 d1kfwa1 d1goia2  
d1edqa2 d2gsja\_ d1hjxa1 d1vf8a1 d1etob\_ d1g2ha\_ d2w0pa\_ d2diaa1  
d2e9ia2 d2e9ja1 d2dj4a1 d2eeba1 d2diba1 d2dmba1 d2dmca1 d2d7oa1  
d2ee6a1 d2d7pa1 d2eeaa1 d2di8a1 d1wlha1 d2d7na1 d2nqca\_ d2d7ma1  
d2dica1 d3cnka\_ d2k3ta1 d2eeca1 d1qfha1 d1qfha2 d2bp3a1 d1v05a\_  
d2ee9a1 d2eeda1 d2di9a1 d1id1a\_ d2hmta\_ d1lssa\_ d1iuka\_ d2csua1  
d3q9ub\_ d2yv1a1 d3q9na\_ d2d59a\_ d2yv2a1 d1euca1 d1y81a1 d1wgqa1  
d1v89a1 d2coda1 d1zc3b\_ d1wg7a1 d1u5ea1 d1v61a1 d2coca1 d2ys1a1  
d1v5pa1 d1ntya2 d1wjma1 d1wi1a1 d1u29a\_ d1xx0a1 d1lunqa\_ d2zkmx3  
d1fhoa\_ d1v88a1 d2adza1 d1x1fa1 d1p6sa\_ d2coaa1 d1btka\_ d1v5ma1  
d1faoa\_ d2x18a\_ d1dyna\_ d1x1ga1 d4kaxb\_ d2j59m1 d1kilb2 d1xcga2  
d1txda2 d1u5da1 d1dbha2 d1wlha\_ d1upqa\_ d1v5ua1 d1foea2 d2fj1a1  
d1eaza\_ d2dfka2 d2cofa1 d1kz7a2 d1d4ua2 d9ldta1 d2ewda3 d1up7a1  
d2dfda1 d1s6ya1 d1vjta1 d7mdha1 d1hyea1 d1t2da1 d1ojsa3 d1ldna1  
d1hyha1 d1civa1 d2a92a1 d1ez4a1 d1i0za1 d1y6ja1 d1gv0a1 d1ur5a1  
d1llda1 d1obba1 d1v8ba1 d1gdha1 d1l7da1 d2dl1a1 d1mx3a1 d1ygya1  
d1qp8a1 d1li4a1 d1j4aa1 d1npya1 d3t4ea2 d1a4ia1 d1o0sa1 d2hk9a2  
d2egga2 d1b26a1 d1bvua1 d1gq2a1 d1c1da1 d1leha1 d1gtma1 d1euza1  
d3dona2 d1edza1 d1gpja2 d1vi2a1 d1p77a1 d1nyta1 d1b0aa1 d1vl6a1  
d1v91a1 d1txga2 d3f47a1 d1mv8a2 d2pv7a2 d1xc2a3 d2ahra2 d4xiya1  
d2f1ka2 d1pgja2 d1i36a2 d1np3a2 d1l1j8a4 d1teaa3 d1qmga2 d2i76a2  
d2g5ca2 d1wdka3 d1dlja2 d3cuma3 d1kola2 d1f8fa2 d1qora2 d1jqba2  
d1vj0a2 d1cdoa2 d1gu7a2 d1xa0a2 d2dm6a2 d1jvba2 d1rjwa2 d1llua2  
d1h2ba2 d1tt7a2 d1piwa2 d1o89a2 d1liz0a2 d1e3ja2 d1yb5a2 d1uufa2  
d1vj1a2 d1e3ia2 d3gpdg1 d1vc2a1 d2nvwa1 d1u8fo1 d1ydwa1 d1hdgo1  
d2g17a1 d1cf2o1 d2czca2 d1r0ka2 d1obfo1 d2cvoa1 d1ebfa1 d1h6da1  
d1i32a1 d1zh8a1 d2q49a1 d1qkia1 d1j5pa4 d3pzra1 d1xeea1 d1vkoa1  
d1vm6a3 d3qvsa1 d2pkqo1 d1b7go1 d1gr0a1 d1p1ja1 d1j0xo1 d3pwka1  
d2hjsa1 d1zyao1 d1vkna1 d1tlta1 d1nvmb1 d3sjua\_ d3ojfa1 d1xu9a1  
d2jjya1 d1n7ha\_ d1y1pa1 d1h5qa\_ d1jtva\_ d4fs3a\_ d2bkaa1 d1gy8a\_  
d2c5aa1 d1ulsa\_ d1ooea\_ d2b69a1 d1y5ma1 d1spxa\_ d1aela\_ d1bxka\_  
d1ydea1 d1gega\_ d1hdoa\_ d1e6ua\_ d1snya1 d2rhca\_ d3zv4a\_ d5ceja\_  
d2d1ya1 d1fjha\_ d3w8ea\_ d2fmua1 d1x1ta\_ d1rpna\_ d3ay7a1 d1k2wa\_  
d1eq2a\_ d2hrba1 d3ruaa\_ d2ew8a1 d4hwka\_ d1xgka\_ d2bd0a1 d1yo6a1  
d2a35a1 d2ntva\_ d1vl8a\_ d1hdca\_ d4bkua\_ d2ag5a1 d2q45a\_ d1nffa\_  
d4iy1a\_ d1zbqa1 d1kewa\_ d1ek6a\_ d1ja9a\_ d2q46a2 d1iy8a\_ d1cyda\_  
d2ptga\_ d1hxha\_ d1uzma1 d3lyla\_ d4m89a\_ d3wyea\_ d2b11a1 d1w6ua\_

d1sb8a\_ d2q2va\_ d4nr0a\_ d1e6wa\_ d2gasa\_ d3oiga1 d2bgka1 d1mxha\_  
d1vl0a1 d1rkxa\_ d1r6da\_ d1wmaa1 d1e7wa\_ d2c07a1 d1xkqa\_ d3tzha\_  
d1g0oa\_ d3lz6a\_ d1qyca\_ d1ledoa\_ d1gz6a\_ d1oc2a\_ d1t2aa\_ d1zema1  
d2xoxa\_ d1z45a2 d1geea\_ d1p33a\_ d3lt0a\_ d4e6pa\_ d2wyua\_ d1db3a\_  
d4q9na\_ d1xh1a\_ d4o1ma\_ d1fmca\_ d2uvda\_ d2gdza1 d1uaya\_ d2z1ma\_  
d2o23a2 d2fr1a2 d2fr1a1 d1qsga\_ d1qyda\_ d4zjua\_ d2a4ka1 d1yb1a\_  
d1wvga1 d1yxma1 d3f4ba\_ d1mg5a\_ d1xg5a1 d3nqyb\_ d4gera\_ d1bqba\_  
d1g0da4 d2f4ma1 d1x3za\_ d3ioqa\_ d1fh0a\_ d1o0ea\_ d1khqa\_ d1m6da\_  
d2cb5a\_ d1cs8a\_ g8pch.1 d1s4va\_ d2pnsa\_ d1vsna1 d1mira\_ d1iwda\_  
d2oula\_ d7pcka\_ d3bwka\_ d3bcna\_ d2p86a\_ d1pvja\_ d1pcia\_ d1gece\_  
d1deua\_ d4bs6a\_ d1xkga1 d1cqda\_ d1jqpa2 d2c0ya\_ d2bdza\_ d3p5ua\_  
d2o36a\_ d1k9xa\_ d1zoya1 d1qo8a2 d1d4ca2 d1chua2 d1jnra2 d2jk6a2  
d2jk6a1 d1feca1 d1feca2 d1lpfa1 d1lpfa2 d1xhca1 d1xhca2 d1dxa1  
d1dxa1 d1gera2 d1m6ia2 d1onfa1 d1onfa2 d3lada2 d3lada1 d1w4xa1  
d1w4xa2 d1gesa2 d1mo9a1 d1xdia1 d1fl2a2 d1fl2a1 d1fcda1 d1fcda2  
d1h6va2 d1h6va1 d1mo9a2 d1gv4a2 d1gv4a1 d2gv8a2 d2gv8a1 d1aoga1  
d1aoga2 d1hyua1 d1ebda1 d1ebda2 d3dk9a1 d1qlra2 d1qlra1 d1gesa1  
d1zbfal d2z1ha\_ d2etja1 d3qioa1 d1jl1a\_ d2e4la\_ d1jl2a\_ d2lsna1  
d1io2a\_ d1uaxa\_ d2yv0x\_ d1mu2a1 d1ekea\_ d1i39a\_ d1pn0a1 d1reoal  
d1ju2a1 d2f5va1 d3c96a1 d2gmha1 d1pj5a2 d1gpea1 d1n4wa1 d1k0ia1  
d2dw4a2 d2ivda1 d1seza1 d2voua1 d1kdga1 d1s5ja1 d2hbja2 d2igia\_  
d1wlja\_ d1qhta1 d4dlea1 d1tgoa1 d2f96a1 d3tr8a1 d3mxma\_ d1q8ia1  
d1y97a1 d1w0ha\_ d1kfsa1 d2py5a1 d1noya\_ d1d5aa1 d1yt3a3 d2guia\_  
d3mwpal d4kb1a\_ d2y8ga\_ d1xkea1 d1k5db\_ d2y8fa\_ d3ljqa\_ glk2x.1  
d1b9ra\_ d1offa\_ d1frra\_ d3wcqa\_ d1l5pa\_ d1wria\_ d1i7ha\_ d3av8a\_  
d1czpa\_ d1rfka\_ d3p1ma1 d3b2ga\_ d2bt6a2 d3nvva1 d1krha3 d2h88b1  
d1n62a2 d1t3qa2 d1kf6b2 d1zoyb1 d1jq4a\_ d1ffva2 d1dgja2 d1rm6c2  
d1jmx2 d1jmx1 d1pbya1 d1r7ha\_ d1faaa\_ d1wika1 d1xfla\_ d1ttza1  
d2f51a1 d1ti3a\_ d1nhoa\_ d1sena\_ d2i4aa\_ d1ep7a\_ d1zmaa1 d1fo5a\_  
d3lefa1 d3diea1 d2yana1 d1z6na1 d1oaza\_ d3zywa1 d4aj8a\_ d1nm3a1  
d4fiwa\_ d1wmja\_ d4hs1a1 d1xwaa1 d1wjka1 d2vm1a\_ d1fb6a\_ d1gh2a\_  
d1h75a\_ d1nw2a\_ d1kx5b\_ d3a6na\_ d4m6ba2 d2nqbd\_ d3wkjd\_ d2yfwe\_  
d4h9na\_ d5bnxa\_ d1kx5c\_ d3r45a\_ d1eqzb\_ d4jjnb\_ d1f66c\_ d1eqza\_  
d4wnnb\_ d1kx5a\_ d1u35c1 d1id3a\_ d2nqbc\_ d1kx5d\_ d1ku5a\_ d1f1ea\_  
d1tafa\_ d1bh9b\_ d1tafb\_ d1jf1b\_ d1h3ob\_ d2byka1 d1n1ja\_ d4g92b\_  
d1bh9a\_ d1jfia\_ d1h3oa\_ d2bykb1 d1n1jb\_ d1pd212 d1nhya2 d2a2ra2  
d1k0dd2 d1f2ea2 d1gsua2 d1f3ba2 d2fhea2 d2pvqa1 d1tw9a2 d1oyja2  
d1e6ba2 d3ik7a1 d4is0a1 d1r5aa2 d1jlva2 d1m0ua2 d3gtub2 d1z9ha2  
d1okta2 d1axda2 d2gsra2 d1tu7a2 d1k3ya2 d1zgma1 d1b48a2 d1gnwa2  
d1gwca2 d2gsta2 d1glqa2 d1oe8a2 d1pn9a2 d1v2aa2 d1fw1a2 d1duga2  
d1ovna2 d1ig8a1 d1czan2 d1czan3 d1czan1 d1ig8a2 d1czan4 d1bg3a4  
d1bg3a3 d1bg3a1 d1qusa\_ d1qqya\_ d1gd6a\_ d1f6ra\_ d1livma\_ d2gv0a\_  
d2z2fa\_ d1j8xa\_ d1ghla\_ d1b9oa\_ d2pjsa1 d2i7ra1 d1ecea\_ d1xqaa1  
d5cj3a1 d1npba\_ d1jifa\_ d2p7oa\_ d1r9ca\_ d1nkia\_ d1mpya2 d1kw3b2

d1kw3b1 d4ghga1 d1tfza1 d3isqa1 d3isqa2 d1sqia1 d1sqia2 d1lkda2  
d1lkda1 d1mpya1 d1cjxa1 d1sp9b2 d1t47a1 d1t47a2 d1flua2 d1sp8a1  
d1sp8a2 d1flua1 d2h0va\_ d1iyka2 d1iyka1 d1rxta1 d1iica1 d1qsta\_  
d2beia1 d4m3sa\_ d1u6ma1 d1ygha\_ d1yk3a1 d3dr6a\_ d1xmta\_ d1z4ea1  
d2ge3a1 d1bo4a\_ d2fiaa1 d2jdca1 d1y9wa1 d3to7a\_ d1wwza1 d2fl4a1  
d2ozua1 d2b5ga\_ d2cy2a1 d2p0wa\_ d1cm0a\_ d4pswa\_ d1yrea1 d1yr0a1  
d1m4ia\_ d2gana1 d1yvka1 d1ghea\_ d2g3aa1 d1y7ra1 d2euia1 d1q2ya\_  
d2fsra1 d1xeba\_ d2ae6a1 d1cjwa\_ d1qsm\_ d2aj6a1 d1y9ka1 d1vkca\_  
d2atra1 d1n71a\_ d2d4pa1 d2fiwa1 d2fe7a1 d1tiqa1 d2ou2a\_ d1yx0a1  
d2fcka1 d1p0ha\_ d2j8ma\_ d2pq8a\_ d1z4ra1 d1s3za1 d1ufha\_ d1xvqa1  
d1pn0a2 d3hy2a\_ d2cvba1 d1o8xa\_ d1lu4a\_ d1we0a1 d2bmx1 d2a4va1  
d1psqa\_ d1xiya1 d1q98a\_ d1n8ja\_ d1zofa1 d2ggta\_ d3tjja\_ d4je1a1  
d1o73a\_ d3s9fa\_ d2zcta\_ d1qmva\_ d1jfua\_ d2b1ka\_ d5dvba1 d2b5xa1  
d2v2ga\_ d3tb2a\_ d411ra\_ d4fh8a1 d1e2ya\_ d1knga\_ d2h30a\_ d1i5ga\_  
d2z9sa\_ d2f8aa1 d1tp9a1 d2b7ka\_ d1nm3a2 d3hvva\_ d2wfca1 d4kcea\_  
d1xvwa1 d4gqca1 d3qpm\_ d4k1fa\_ d1zzoa1 d1gpla\_ d1prxa\_ d1rmka\_  
d1ixta\_ d1eyoa\_ d1cna\_ d1fu3a\_ d1g1pa\_ d1f3ka\_ d1fyga\_ d1e88a1  
d1l6ja4 d1eaka4 d1eaka3 d1l6ja3 d1h8pa2 d1h8pa1 d1jgta2 d1ofda3  
d1ea0a3 d1ecfa2 d1q15a2 d1ao0a2 d1te5a\_ d1ys1x\_ d4hs9a\_ d1ex9a\_  
d1ku0a\_ d3qmma\_ d1dy2a\_ d1mixa2 d1e5wa2 d1j19a2 d1isna2 d2a16b2  
d1lgya\_ d4l3wa\_ d1llfa\_ d1lukca\_ d4wfia\_ d4cg1a1 d3visa\_ d1svpa\_  
d1mbma\_ d3su6a1 d1cula1 d4agka\_ d1vcpa\_ d1q31a\_ g1n11.1 d3e90b\_  
d1ep5a\_ d3u1jb\_ d3zxha\_ d1cgl\_ d1rm8a\_ d1eaka2 d1hy7a\_ d2jsda\_  
d1cxva\_ d1hv5a\_ d1i76a\_ d1eb6a\_ d3p0ya1 d1igra1 d1igra2 d1n8yc1  
d1m6ba2 d1m6ba1 d4dv8a2 d1j7na1 d1jx4a2 d3gv5b1 d1t94a2 d3bq0a2  
d1ohfc\_ d2tbvc\_ d1c8nc\_ d1x36a\_ d1smvc\_ d4sbvc\_ d1lopa\_ d1f2nc\_  
d1cixa\_ d1y29a\_ d1v7fa\_ d2jtba\_ d1d1ha\_ d1g9pa\_ d1lupa\_ d1qk7a\_  
d1mb6a\_ d2a2va\_ d1niya\_ d1i25a\_ d1hvwa\_ d2mpqa\_ d1ie6a\_ d1kqha\_  
d1la4a\_ d2mxoa1 d1d10a\_ d1koza\_ d1qk6a\_ d1emxa\_ d1lqra\_ d1c6wa\_  
d1js9c\_ d1f15b\_ d1za7a\_ d1laja\_ d1rypd\_ d1irua\_ d1rypc\_ d3unfk\_  
d1rypa\_ d1j2pa\_ d1irui\_ d1j2qh\_ d3unfh\_ d1m4ya\_ d1rypb\_ d1irul\_  
d1irug\_ d1iru2\_ d1q5rh\_ d1rypg\_ d1g3ka\_ d1iruf\_ d1q5qa\_ d1e94a\_  
d1irub\_ d1ryph\_ d3ty6a\_ d1iruj\_ d1iruk\_ d1rype\_ d1irud\_ d1irue\_  
d3mi01\_ d1rypf\_ d2z3ba\_ d1iruc\_ d3mka2\_ d1irul\_ d1ny721 d1ny722  
d1a6ca3 d1a6ca2 d1a6ca1 d1pgl21 d1pgl11 d1ny711 d1mqta\_ d1d4m3\_  
d1fmd3\_ d2mev1\_ g1aym.1 d1ev13\_ d4q4w1\_ d1r1a3\_ d2x5ia\_ d1rhi1\_  
g1r1a.1 g1d4m.1 g1rhi.1 d1b35b\_ d1lopa\_ d1tme1\_ d4iv1a\_ g1pvc.1  
g1fpn.1 d1fpn1\_ d4gb31\_ d1d4m1\_ d1fmd1\_ d1ev11\_ d2wzr3\_ g1cov.1  
d1qqp3\_ g1fmd.1 d2x5ic\_ d1rhi3\_ g1oop.1 d1hxs1\_ g1hxs.1 d1fpn3\_  
d1bev1\_ g2mev.1 d1eah3\_ d1aym1\_ d1pvc3\_ d1qqp1\_ d1zba3\_ d1h8ta\_  
d3vbhc\_ g1b35.1 g1bev.1 d1hxs3\_ g1ev1.1 d1bev3\_ g1tmf.1 d1tmf1\_  
d1b35a\_ d2mev3\_ g1eah.1 g1h8t.1 d1eah1\_ d4q4w3\_ d1r1a1\_ d1aym3\_  
d1pvc1\_ d1zba1\_ d1h8tc\_ d1oopc\_ d1tme3\_ g1qqp.1 d4iv1c\_ d1y14b1  
d2nn6i1 d1i941\_ d2zjra2 d1smxa\_ d2qamc2 d1hh2p1 d2r7da1 d1r12a2

d1wfaq1 d3bzka4 d1x6oa2 d3a0ja\_ d2j01d2 d2ja9a1 d4q15a\_ d1hr0w\_  
d1luza\_ d2n3sa\_ d2vnud1 d1h95a\_ d1go3e1 d2nn6h1 d1ne3a\_ d2mola\_  
d1iz6a2 d1jjga\_ d1e3pa2 d2ix0a3 d2ix0a2 d21xja\_ d1ueba3 d1ueba2  
d2z0sa1 d1u01a1 d2ix0a1 d2eifa2 d2je6i1 d3i2za1 d2c35b1 d2ahob2  
d1t9ha1 d3i4oa\_ d2qall1 d1jt8a\_ d2nn6g1 d1g6pa\_ d3cama\_ d1i94q\_  
d1c9oa\_ d1d7qa\_ d2ba0a1 d2vnud2 d2vnud3 d1khia2 d2qalq1 d1wi5a1  
d1xtda2 d1ny4a\_ d2flia1 d1rpxa\_ d1tqja\_ d1tqxa\_ d4lt9a1 d3tc7a1  
d3hoja\_ d3vnda\_ d3n18a1 d1geqa\_ d3nava1 d1v5xa\_ d4a2ra1 d3tc6a1  
d1ujpa\_ d4ijba\_ d1xcfa\_ d1vc4a\_ d1rd5a\_ d1qopa\_ d3b5va\_ d2r80b\_  
d1cqxa1 d1cg5a\_ d1gcvb\_ d3boma\_ d2h8fb\_ d2raoa\_ d3bj1a\_ d4hrrb\_  
d2r50a\_ d3d1kb\_ d2aa1b1 d3zhwa\_ d3hf4b\_ d3gdja\_ d1jebb\_ d3bj1b\_  
d1x9fb\_ d1wmub\_ d1gcva\_ d3bcqb\_ d3d4xb\_ d1gvha1 d2dc3a\_ d3hf4a\_  
d4yu3a\_ d3k8ba\_ d1qpwb\_ d2r80a\_ d3bcqa\_ d1v4wa\_ d3wtgb\_ d1j17a\_  
d4esaa\_ d1a9we\_ d3d1ab\_ d1fsla\_ d4h21a\_ d1v4wb\_ d1mwca\_ d1vhba\_  
d1jeba\_ d1spgb\_ d1h97a\_ d1q1fa\_ d1tu9a1 d3d1aa\_ d1hdsb\_ d3hyub\_  
d2zfbb\_ d3fs4a\_ d1oj6a\_ d1shrb\_ d4h21b\_ d4yu3b\_ d1spga\_ d3hrwa\_  
d3qqra\_ d3at5a\_ d4wchd\_ d3hyua\_ d1cg5b\_ d1uc3a\_ d1hbra\_ d2raob\_  
d1outb\_ d4esab\_ d3gdjb\_ d3qqqa\_ d1x9fc\_ d3vrfa\_ d1litha\_ d3mkba\_  
d3d4xa\_ d3mjpa\_ d1j16a\_ d3fh9a\_ d1outa\_ d2dc3b\_ d1it2a\_ d3eoka\_  
d3g46a\_ d1qpwa\_ d3vrfb\_ d1ch4a\_ d1x9fd\_ d1hdsa\_ d2zfa\_ d3mkbb\_  
d1or4a\_ d3wtga\_ d1a4fa\_ d3fh9b\_ d3bomb\_ d3cy5a\_ d3at5b\_ d1x9fa\_  
d2oifa\_ d4lmbx\_ d1cpcb\_ d3v57a\_ d1kn1a\_ d1cpca\_ d4f0ta\_ d2vjha\_  
d4po5b\_ d1eyxa\_ d1alla\_ d4f0tb\_ d1b33b\_ d1b8db\_ d4h0mb\_ d2vjhb\_  
d4lm6b\_ d2vmlb\_ d1allb\_ d2vjta\_ d3dbja\_ d2vmla\_ d2vjtb\_ d4f0ub\_  
d1f99b\_ d4rmpa1 d1liaa\_ d1eyxb\_ d2uulb\_ d4lmsb\_ d4f0ua\_ d2bv8a\_  
d1f99a\_ d2bv8b\_ d2c71b\_ d3dbjb\_ d4rmpb1 d1b8da\_ d4h0ma\_ d3v57b\_  
d1kn1b\_ d1liab\_ d2uula\_ d2j96a\_ d1mtza\_ d1hlga\_ d2xqfa\_ d1ea5a\_  
d1f6wa\_ d1dx4a\_ d1qe3a\_ d1k4ya\_ d4qwwa\_ d2ha2a\_ d3c8da2 d2pbla1  
d1jkma\_ d1jjia\_ d1jjfa\_ d4iuaa3 d4bvva\_ d5hpga\_ d3k65a\_ d1ki0a3  
d1ki0a2 d1ki0a1 d1a0ha1 d1pmla\_ d3sp8a3 d2feba1 d1f74a\_ d3l21a\_  
d2e1da\_ d1to3a1 d1w3ia\_ d1sfla\_ d1n7ka\_ d1vcva1 d4imea\_ d1wa3a\_  
d2ocza1 d1f2ja\_ d3m16a\_ d2yxga\_ d1ub3a\_ d3a5fa\_ d1l6wa\_ d1xfba1  
d1wx0a1 d1vpxa1 d1ojxa\_ d1mxsa\_ d2a4aa1 d1xkya1 d3cq0a1 d3s1xa\_  
d1f05a\_ d1fdja\_ d3cpra1 d4d2ja\_ d1cg2a1 d1yloa2 d1y7ea2 d1y0ya3  
d1lfwa1 d1vixa1 d1fnoa4 d1vh0a2 d1ysja1 d1vhea2 d1z21a1 d2fvga2  
d1vgya1 d1r3na1 d2grea2 d1xmba1 g1q71.1 d3rp2a\_ glucy.1 d1fuja\_  
d2zchp\_ d3w94a\_ d1si5h\_ d1lo6a\_ g2pka.1 d1cgha\_ d1kigh\_ d1a5ia\_  
d3s9ba\_ d1hj8a\_ d1ao5a\_ d2anya\_ d1q3xa1 d1gvza\_ d1azza\_ d4gsoa\_  
d2f91a1 d1iaua\_ d1gdna\_ d1eufa\_ g1fiw.1 d1eq9a\_ d4nfea\_ d2rdla\_  
d1spja\_ d1elva1 d1a7sa\_ d1ekbb\_ d1pfxc\_ d1yc0a\_ d2aiqa\_ g1fiz.1  
d1fi8a\_ d4k60a\_ d4dgja\_ d1mzaa\_ d1lop0a\_ d3tjva\_ d1pytd\_ d1sgfg\_  
g1gg6.1 d2eeka\_ g1rtf.1 d1a0ja\_ d3g01a\_ d1pytc\_ d4e7na\_ d1ddja\_  
d1z8ga1 d2hlca\_ d1npma\_ d1brup\_ g1jou.1 d1sgfa\_ d1autc\_ g2hnt.1  
g1kdq.1 d1orfa\_ d3s69a\_ d4crga\_ d1fxya\_ d1bqya\_ d2ftba\_ d1pmpa\_

d2rcqa1 d1fdqa\_ d4lkpa\_ d1sa8a\_ d1vyfa\_ d1lpja\_ d3vg7a1 d4azqa1  
d1o8va\_ d5bvqa\_ d1p6pa\_ d2qo4a\_ d1opba\_ d1yiva1 d1o1va\_ d4bvma1  
d4tkba\_ d4i3ba\_ d1bwya\_ d1ftpa\_ d1ggla\_ d4gkca\_ d1cbia\_ d3p6da1  
d1kqwa\_ d2a0aa1 d1dzka\_ d4tlja\_ d2a2ua\_ d4wfva\_ d3t1da\_ d4iixa\_  
d3zq3a\_ d2nnda\_ d1i4ua\_ d1kxoa\_ d1bbpa\_ d1kt7a\_ d1exsa\_ d3s26a1  
d1lf7a\_ d1qfta\_ d4gh7a\_ d1z24a1 d1qabe\_ d1xkia\_ d3bx7a\_ d4iawa1  
d1n0sa\_ d1gkab\_ d3kzaa\_ d2k23a\_ d2l9ca1 d2joza1 d1gm6a\_ d3kffa\_  
d3saoa1 d1e5pa\_ d1yupa1 d1iiua\_ d3lgia\_ d3i77a\_ d2z9ia2 d4nsva\_  
d1lcya2 d4jcna\_ d1agja\_ d1os8a\_ d1hpga\_ d1p3ca\_ d1l1ja\_ d1qtfa\_  
d2i49a\_ d1nnfa\_ d1xvxa\_ d1ursa\_ d1h3da1 d1iuda\_ d4m1va1 d1twya\_  
d3e13x\_ d2nxoa1 d4pfua\_ d3ttma\_ d1elja\_ d2qmwa1 d1us5a\_ d1y3na1  
d1jeta\_ d1uqwa\_ d4f19a1 d2esna2 d3thia\_ d3fasa1 d2uyeb\_ d2xwva1  
d1r9la\_ d2fyia1 d1pb7a\_ d2ozza1 d1sw5a\_ d1nh8a1 d1vr5a1 d2g29a\_  
d1xs5a\_ d3lswa\_ d2z23a\_ d3w9va\_ d3tcha\_ d1q35a\_ d1z7me1 d3q27a\_  
d1p99a\_ d1ve4a1 d2i6ea1 d4mcoa1 d4n8ya\_ d1zbma1 d1hsla\_ d1ixca2  
d1j1na\_ d1xvya\_ d1y9ua\_ d2z22a1 d1xoca1 d4oera\_ d1wdna\_ d5f1qa1  
d1xt8a1 d1i6aa\_ d4gwoa\_ d4igta1 d1pc3a\_ d4mmpa1 d1o63a\_ d2cz1a1  
d2onsa2 d4mija1 d1eh3a\_ d3skpa\_ d1dtza1 d1dtza2 d1jnfa2 d1ce2a1  
d1jnfa1 d1b1xa2 d1b1xa1 d1jw1a1 d1jw1a2 d1ryoa\_ d1h76a1 d1h76a2  
d1w52x1 d2pp1a1 d1hpla2 d1lpbb2 d2oxea1 d1bu8a2 d1rp1a2 d3q3ma\_  
d1za0a1 d1mxra\_ d2inca\_ d1jk0a\_ d2incb\_ d1mhyb\_ d3hf1b\_ d1mtyb\_  
d1r2fa\_ d2uw1a\_ d1mhyd\_ d3n37a\_ d1afra\_ d1oquc\_ d1syya\_ d1mtyd\_  
d2o1za\_ d1uzra\_ d1smsa\_ d2fkza\_ d1zuja1 d1s3qa1 d2fjca1 d1z6om1  
d1veia\_ d4dyya\_ d1jiga\_ d3gvya\_ d2pyba\_ d4cy9a1 d3bvfa1 d1r03a\_  
d2cf7a\_ d1nf4a\_ d1zs3a1 d4iwka\_ d3ka8a\_ d3np0x\_ d1n1qa\_ d11b3a\_  
d4e6ka\_ d1z6oa1 d2fzfa1 d4dyua\_ d3ge4a\_ d1jgca\_ d4am4a\_ d2z6ma\_  
d1ji5a\_ d1vlga\_ d1lkoa1 d1krqa\_ d3qz3a\_ d1o9ra\_ d2ffxj\_ d1euma\_  
d1yv1a1 d2v2pa\_ d1j30a\_ d4di0a\_ d1oewa\_ d2qzxa\_ d2asia\_ d1psoe\_  
d1miqa\_ d1smra\_ d2h6ta\_ d1pfza\_ d1izda\_ d3hd8a\_ d1j71a\_ d1dpja\_  
d4aa9a\_ d1t6ex\_ g1b5f.1 g1lya.1 g1htr.1 d1qdma2 d1bxoa\_ d1wkra\_  
d1tzsa\_ d1libqa\_ d2qzwa\_ d1bdqa\_ d3ggta\_ d3ixoa\_ d1mrxa\_ d2haha\_  
d1tw7a\_ d4njja\_ d1sgua\_ d2p3da\_ d1nsoa\_ d3d3ta\_ d2rkfa\_ d1c6ya\_  
d2rspa\_ d3ogpa\_ d3ekwa\_ d2o4na\_ d2j9ja\_ d1baia\_ d3ggua\_ d3lzua\_  
d4npua\_ d4j55a\_ d2r8na\_ d2fxda\_ d2p3ca\_ d4dqa\_ d3ttpa\_ d3t3ca\_  
d2p3aa\_ d2hc0a\_ d2fdda\_ d3mwsa\_ d1h4ra3 d4yl8a1 d2a16a3 d1wgda1  
d1wggal d4q5eb\_ d1wjna1 d1se9a\_ d3n3kb\_ d1wz0a1 d1we6a1 d2m0xa\_  
d2gbka\_ d3rt3b1 d1wh3a1 d1sifa\_ d2ekek2 d4ii2b1 d4hk2a1 d1c3ta\_  
d1m94a\_ d1wgha1 d1ttna1 d1j8ca\_ d1wx8a1 d3v6cb1 d2ma9b\_ d4i61b1  
d1bt0a\_ d2jvca1 d1iyfa\_ d2k1fa\_ d1wxva1 d1wf9a1 d1t0ya\_ d2io0b2  
d1x1ma1 d2gbma\_ d1zw7a1 d2m17a\_ d1ud7a\_ d1we7a1 d2lwpaa\_ d2gbja\_  
d1wjua1 d1v6ea1 d1v86a1 d4eewa\_ d1wiaa1 d4icva\_ d4gu2a\_ d1wx7a1  
d1wy8a1 d4hjka1 d2faza1 d1v5oa1 d3ruib\_ d3waob\_ d2r2qa1 d3m95a\_  
d3wana\_ d2a13a1 d2cr5a1 d1wj4a1 d1s3sg\_ d1g66a\_ d5ajha1 d4lu0a\_  
d1of8a\_ d3unda1 d3e9aa1 d1vr6a2 d1n8fa\_ d2qkfa\_ d1d9ea\_ d1o60a\_

d3h33a\_ d1rwja\_ d19hca\_ d3bxua\_ d3h4na\_ d1i77a\_ d3caoa\_ d1j0pa\_  
d2ctha\_ d1duwa\_ d1ofwa\_ d2e84a\_ d1hh5a\_ d1gyoa\_ d3h34a\_ d1dszb\_  
d1a6ya\_ d3cbba\_ d1ynwa1 d1r4ia\_ d1hcqa\_ d2hana\_ d2hanb\_ d2enva1  
d1kb4b\_ d2n11b\_ d1l01a\_ d1cita\_ d2dara2 d2dara1 d1wyha2 d2dloa2  
d1rutx4 d1rutx3 d2cuqa2 d1x41a2 d1x41a1 d1x3ha2 d1x3ha1 d2d8za1  
d1x61a2 d1x6aa1 d1x6aa2 d2cora2 d2cora1 d1v6ga1 d1v6ga2 d2d8za2  
d1x64a1 d1x64a2 d1b8ta1 d2co8a1 d1x63a2 d2dj7a2 d2dj7a1 d2cu8a2  
d2cu8a1 d1g47a2 d1g47a1 d1j2oa1 d1wyha1 d2dloa1 d1wiga1 d1wiga2  
d2cupa2 d2cupa3 d1x68a1 d2d8ya2 d2d8ya1 d1m3va2 d1x62a1 d1x68a2  
d1x61a1 d1b8ta3 d1b8ta2 d2d8xa2 d2d8xa1 d1x4ka1 d1x4ka2 d2cuqa1  
d1m3va1 d2co8a2 d1j2oa2 d1x63a1 d2cura1 d2cura2 d1x62a2 d3ia2a\_  
d1a88a\_ d4dgqa1 d1zoia\_ d2k4ua\_ d1hp2a\_ d2lu9a\_ d1baha\_ d2meoa1  
d1wm7a\_ d1hlya\_ d1n8ma\_ d1jlza\_ d1wpda\_ d1c55a\_ d1pvza\_ d1wt7a\_  
d1rjia\_ d1wz5a\_ d1m2sa\_ d1pjva\_ d1qkya\_ d2ktca1 d1wmta\_ d1du9a\_  
d1j5ja\_ d1r1ga\_ d1t0za\_ d2i61a\_ d1t1ta\_ d1sn4a\_ d1kv0a\_ d21kba\_  
d1npia\_ d1wwna\_ d1pe4a\_ d2kbka\_ d2li7a\_ d1djta\_ d2kbha\_ d1dq7a\_  
d1sega\_ d1omya\_ d1zywa1 d1jzaa\_ d1n9wa1 d1bbua1 d1e1oa1 d1c0aa1  
d1b8aa1 d3a74a1 d1eova1 d1iyjb4 d1iyjb5 d1iyjb3 d1o7ia\_ d4ipca1  
d1x3ea\_ d4apva\_ d1jb7a1 d1jb7a2 d1jb7a3 d3kdfa\_ d1ue1b\_ d1wjja1  
d3eiva\_ d1xjva2 d1xjva1 d2ccza2 d1se8a\_ d1l1oc\_ d1jb7b\_ d1qvca\_  
d3ulla\_ d1qzga\_ d1miua4 d1miua5 d1miua3 d3ubub\_ d1legia\_ d1qo3c\_  
d1v7pa\_ d1tdqb\_ d3ubua\_ d1c3ab\_ d1h8ua\_ d3bx4b\_ d1t8ca1 d1sb2a1  
d1qdda\_ d2ziba1 d3cada\_ d1byfa\_ d1j34b\_ d1jwia\_ d1jzna\_ d1c3aa\_  
d1oz7b\_ d1wmza\_ d3bdwb\_ d1hq8a\_ d1fifa1 d1dv8a\_ d3hupa\_ d1wk1a1  
d1umra\_ d2afpa\_ d3bx4a\_ d1gz2a\_ d1s16a\_ d1v7pb\_ d3g8ka\_ d1ixxa\_  
d1j34a\_ d1jwib\_ d1g1sa1 d1y17a1 d1ja3a\_ d1fvub\_ d3bdwa\_ d1sb2b1  
d1fvua\_ d1umrc\_ d1oz7a\_ d4m17a\_ d3cfwa1 d1ypqa1 d3fd4a\_ d3l9jc\_  
d4dn8a1 d1v41b\_ d1rd11\_ d2msba\_ d1cwva5 d1ohea2 d2f4da\_ d1rxda\_  
d2hxpa\_ d1xria\_ d1d5ra2 d1fpza\_ d3ezza\_ d4y2ea\_ d1i9sa\_ d3azya\_  
d3wvja\_ d1upsa1 d1ajoa\_ d2hyka\_ d1ajka\_ d2vy0a\_ d1o4ya\_ d3o5sa\_  
d3d6ea\_ d3atga\_ d1dypa\_ d1umza\_ d3i4ia\_ d1c11a\_ d41bqa\_ d1slta\_  
d4no4a\_ d3zsja\_ d3duia\_ d1g86a\_ d1is3a\_ d1qmja\_ d1hlca\_ g1qmo.1  
d3zyra\_ d1fnya\_ d1n47a\_ g2ltn.1 d1avba\_ d3usua\_ d1dhkb\_ d1f9ka\_  
d1ukga\_ d1g8wa\_ d1g9fa\_ d1wbfa\_ d3wcsa\_ d1g7ya\_ g1loe.1 d1mvqa\_  
d1hq1a\_ d1v6ia\_ d1dbna\_ d1qnwa\_ d1fx5a\_ d418qa\_ d1ioaa\_ d3n35a\_  
d3ubra\_ d1qo8a1 d1d4ca1 d2k3va\_ d1ft5a\_ d1qdba\_ d1m1qa\_ d2j7aa\_  
d1h21a\_ d1ogyb\_ d4fasa\_ d1jnia\_ d1oaha\_ d1sp3a\_ d2h0ba\_ d2erfa\_  
d1h30a2 d1h30a1 d3mw4a1 d1pz7a\_ d2r1ba\_ d3v64a1 d1d2sa\_ d3bopa1  
d3mw3a1 d1okqa1 d1okqa2 d1wioa4 d1ccza2 d1vcaa1 d1dr9a2 d1lic1a1  
d2d9qb1 d2nxyb2 d1adqa1 d1fnga1 d1uvqb1 d1zs8a1 d2vola1 d2vola2  
d1mfb12 d2jelh2 d1uwel2 d3qq4b1 d1kjob\_ d1k5na1 d1osph2 d4odh12  
d1ow0a1 d1ow0a2 d1bfob2 d3l9ra2 d3jtth1 d2fath2 d4elkb2 d1fn4b2  
d2xfxb\_ d1pg7x2 d1cqka\_ d4k71b2 d1lk2a1 d1eapb2 d4lfhg2 d1i4fa1  
d2nw2a2 d1kfah2 d1mhca1 d1h3ua1 d1wejh2 d1h0db2 d1a5fh2 d1kcvh2

d1mjuh2 d1qqda1 d1kcrh2 d1k8ia1 d3huja2 d2nnab1 d1nfd2 d3mffb2  
d1s9va1 d1lk3h2 d1q0xl2 d1fv1b1 d1neza1 d4rfeb2 d1r3ha1 d1a6tb2  
d1kjsva1 d1pz5b2 d1onqa1 d2bc4a2 d1de4a1 d1k8da1 d1tcra2 d1dn0b2  
d1nfd2 d2xwtb2 d1bfoa2 d1mexh2 d1iakb1 d1ypzf2 d4f7ea2 d1q7212  
d2fbjh2 d1fe8h2 d1clzh2 d1fngb1 d1uvqa1 d1vgka1 d1c16a1 d4j12a2  
d4x99b2 d1igtb3 d1je6a1 d1q72h2 d1nldh2 d1teth2 d2hmic2 d1i1ca2  
d1i1ca1 d1k8ib1 d1q0yh2 d1kfa1 d3frua1 d1pg7w2 d1u58a1 d1igyb4  
d1igyb3 d1hyrc1 d1klub1 d1deeb2 d1c12b2 d2bc4b2 d2ig2h2 d1kcv12  
d3wn5b1 d1lk2b\_ d1lk312 d1mjul2 d1sm3h2 d1q0xh2 d1zvsal d1ydpal  
d1u8ib2 d1ypze2 d1kcu2 d1op9a\_ d1y0la1 d1etzb1 d1legj1 d2gsib1  
d1nj9a1 d4jfh1 d1aqk1 d1t2ja\_ d1lo4h1 d1zvya1 d3v4v1 d4enec1  
d1kxtb\_ d5e8ea1 d2pxya\_ d4weud\_ d1xiwc\_ d2esvd1 d1qznh\_ d1logae1  
d1f4xh1 d4n1hb\_ d3ezjb1 d3mlw1 d1kfah1 d1etza1 d1b4jh1 d3cfic\_  
d4w68a\_ d2arja1 d1ek3a\_ d2ok011 d1vera\_ d1uwgh1 d1blnb1 d1fpth1  
d1rzga1 d2giya1 d4m3kb1 d1nc2a1 d2nyyd1 d1ncna\_ d1fbih1 d5dxwa\_  
d4fqqa1 d1dqdh1 d1jfq1 d1kelh1 d1faih1 d1frgl1 d1figl1 d4m6n11  
d1fo0a\_ d4hxb1 d3b5ga\_ d3quyd1 d2h9gb1 d1i8kb\_ d2dd8h1 d2ck0h1  
d1eaja\_ d4w6wb1 d2a6ib3 d1t66d1 d2e27h\_ d1ob1b1 d1f11b1 d2v7na1  
d1ad0a1 d2xt1b1 d1pskh1 d4i13b1 d2op411 d1a0q1 d1uwell d1za3a1  
d1ncb1 d4uu9a\_ d1bm3h1 d1cloh1 d1nqba2 d1cf8h1 d4y5va\_ d1mhph1  
d5anma1 d4cdgc1 d4ldeb\_ d1y0lb1 d2pcpb1 d1z3gl1 d1dfb1 d1fh5h1  
d3g5xa1 d1tzib1 d4dn311 d3zhka1 d2b1hh1 d2uyl1 d1f3dh1 d1nj9b1  
d2agjh1 d2h1p1 d1q72h1 d8fabb1 d1ndmb1 d1rjca1 d4u6hb1 d3upca\_  
d2fbj1 d1osph1 d1tvda\_ d2cjh\_ d4fhbd1 d1bd2d1 d1rz7h1 d3nn8a\_  
d1knoa1 d1nfda1 d2bmb1 d1dq1\_ d1igyb1 d1igf1 d12e8h1 d3utza1  
d1nc2b1 d1rihh1 d4mwfb1 d4jvpa1 d1mieh1 d1rhfa1 d1fgn1 d1sbsh1  
d1lp9e1 d1dn0a1 d4lqf1 d1iaih1 d1kgcd1 d1mh5b1 d1gpoll d2g60h3  
d1f8t1 d2jixd1 d4grwh\_ d1fo0b\_ d1bfob1 d1axsa1 d1u9ka\_ d1nmbh\_  
d1h8na1 d1h8na2 d1jguh1 d4eura1 d3sdy1 d35c8h1 d1w7211 d1mvub\_  
d1i9rh1 d1ob1a1 d4wenb\_ d1yeeh1 d3ietc1 d1f58h1 d1ad0b1 d1mqk1\_  
d1nbvh1 d4b50a\_ d3r8bb\_ d1baf1 d1mamh1 d4rgne1 d2gsgb\_ d35c811  
d1bafh1 d1aih1 d2pcpa1 d2fath1 d2x1pa\_ d1orsb1 d1ibgl1 d1shma\_  
d1a2yb\_ d1u0qa\_ d2coqa\_ d1hilb1 d1qfwi\_ d1jv5b\_ d1fn4b1 d5e0qa\_  
d1nsnh1 d1plgl1 d4ocx1 d1kb5h1 d1rzh1 d1pg7x1 d2fx7h1 d2oi9c\_  
d1l7il1 d3eyva1 d1d5il1 d4ffyl\_ d1tet1 d1a6wh\_ d1ac6a\_ d3dvfa\_  
d1nfd1 d1mimh1 d1ri8a1 d1jhlh\_ d3dura\_ d1fskb1 d1f97a1 d3so3b1  
d2ak4d1 d1lp9f1 d4z7wf1 d1l7th1 d4y5ya\_ d4x7ec1 d1emth1 d1likf11  
d1nlbh1 d4utal1 d1bjma1 d1eapb1 d1u6ah1 d2dtgd1 d1kj2b\_ d1xeda1  
d1cleh1 d1fgvh\_ d2bnub1 d2fb4h1 d2dtgb1 d1ktrh\_ d1jpth1 d1qkz11  
d4hepg\_ d2atpb1 d1flrh1 d2hrp1 d1mvfa\_ d1iaim1 d3k80a1 d2jb5h1  
d3zkxc\_ d4grwe\_ d1it9h1 d1rhhb1 d3w9ec\_ d1e4wh1 d1sy6h1 d2j6eh1  
d3qxta\_ d1jglh1 d1p7ka1 d1tzhb1 d4n8pa1 d1gaf1 d2jelh1 d1wioa2  
d4i0cc1 d1cicb1 d1lmka2 d1lmka1 d1iqwh1 d1orqb1 d1ejoh1 d1jnlh1  
d4zga\_ d43c9b\_ d1ggbl1 d1wejh1 d3q6fa1 d1f3dj1 d3c6la1 d1bqlh1

d3p9wb\_ d1a3r1l d1h0db1 d2uzil\_ d1eo81l d1qfwl\_ d1n7ml1 d1igja1  
d1c5ch1 d2a9mh\_ d1rmfh1 d1fj1b1 d4heme\_ d1ccza1 d1a5fh1 d1ogad1  
d1dlfh\_ d1qa9b\_ d1vgel1 d3qskb\_ d1sjxa\_ d4ozfg1 d1sq2n\_ d1qd0a\_  
d1kcvh1 d1c5db1 d3qcull d8faba1 d3bn9d1 d1mjuh1 d4y8dc\_ d7fabh1  
d3dvgb1 d1lo0l1 d1a6tb1 d1gigh1 d1kcrh1 d2hwz1l d1yjdc1 d3clfl1  
d4krna\_ d1d17l\_ d1e6o1l d1mexh1 d3r0ma\_ d4kkna\_ d1fns1l d1loaqh\_  
d1rzia1 d1lucbh1 d1ncw1l d4b41a\_ d1nfd1 d2mpah1 d2d7t1l d4grwf\_  
d4b5ea\_ d1l1k3h1 d3u79a\_ d4u3xa\_ d1ghf1l d1bvkb\_ d1mcww1 d1b88a\_  
d1jrhh1 d32c2b1 d4wemb\_ d1dsfh\_ d1op3h1 d1ce1l1 d1iqda1 d1qoka1  
d1qoka2 d1qfuh1 d2crya1 d1ay1h1 d1loaq1\_ d3ab0b\_ d1rur1l d1t4kb1  
d1bz7b1 d1n0xh1 d1for1l d1lucb1l d4w6yb\_ d43c9a\_ d2aabl1 d1tzia1  
d4n1ca\_ d1k6qh1 d3g9ab\_ d4tvsa1 d1ligmh\_ d1pz5b1 d3dx9a1 d3wxwh\_  
d1nakh1 d1kcul1 d3eaka\_ d4qlra1 d1cr91l d1d9ka\_ d1f4x1l d1deea1  
d2i27n2 d1c12a1 d2orb1l d1j8hd1 d1mcp1l d1c5da1 d1kenh1 d1bd2e1  
d1h5ba\_ d4x7fc1 d3upaa\_ d1t3fa1 d1indh1 d2dtgc1 d4hc1l1l d1zv5a1  
d4wgvb\_ d1uwgl1 d4f37k1 d1laqkh1 d1vesa\_ d3zkqd\_ d1fpt1l d1lo4l1  
d1knob1 d3rrqa\_ d1ct8b1 d4orz\_ d1mlbb1 d4hgkc1 d1dgd1l d1bogb1  
d4ozhe1 d1dr9a1 d1i7za1 d1dn0b1 d1kell1 d1rzib1 d1ypzf1 d1wtla\_  
d1hkfa\_ d1fail1 d1figh1 d2vyre\_ d1sjva\_ d1ohqa\_ d1bfoa1 d1pkqb1  
d1mju1l d1b4j1l d1nsn1l d2arjb1 d1p4bh\_ d4aj0a\_ d3nn8b\_ d2rcja1  
d1f2xk\_ d4v1dd\_ d1adqh1 d2eksa\_ d4k3ga\_ d1jfqh1 d1uweh1 d1frgh1  
d4gftb\_ d1uz8b1 d4n1ea\_ d1bm3l1 d1clo1l d3mcka1 d2vq1a1 d1ae6h1  
d4aq1b1 d1uj3b1 d1nbqa1 d1fh5l1 d2ck0l1 d2ywza\_ d1q72l1 d4nbxb\_  
d1hila1 d4hz1b1 d2j88l1 d1zmya1 d1cd0a\_ d1a4ka1 d1psk1l d1a0qh1  
d4krmb\_ d1ncbh1 d2fbjh1 d1j8he1 d1i3ua\_ d1cf8l1 d1fe8h1 d2p1ya1  
d1eeqa\_ d2x89a\_ d1o10a\_ d2r0lh1 d1ub5a1 d1dfbh1 d3eyvb1 d4jdvb1  
d4p2cg\_ d2gsia1 d2agj1l d1u3ha1 d2h1ph1 d1rih1l d1fskc1 d1boga1  
d2a77l1 d1ospl1 d1qfoa\_ d3dwta\_ d2fx7l1 d1rz7l1 d3stba1 d1pkqa1  
d1b6da1 d1dzba2 d1dzba1 d1kj2a\_ d4l1ha\_ d1rzgb1 d1dqlh\_ d12e8l1  
d1mie1l d1jmaa\_ d1sbs1l d1fgnh1 d1f58l1 d1mqkh\_ d1ndgb1 d3qeg1l  
d1iail1 d2aw2a1 d1tqbc1 d3fo2a1 d4dkaa\_ d1f8th1 d2g60l1 d2ywya\_  
d1uj3a1 d1yc7a\_ d3bd3a\_ d4w6xb1 d1nmb1\_ d1i8ka\_ d1rjlb1 d1ypze1  
d1p7kb1 d1kxqe\_ d1gpoh1 d2z4qa1 d1w72h1 d1i9rl1 d4qgya1 d4xt1c\_  
d2qqnh1 d1cica1 d3c08h1 d2cd0a\_ d2bdnh1 d1hnga1 d1mam1l d1nldh1  
d1cr9h1 d4lcih1 d3bkyh1 d3qg7l1 d1ai1l1 d1kxvc\_ d4iosd\_ d1l7ih1  
d2x1qa\_ d1ub6b1 d3k74b\_ d1libgh1 d1teth1 d1igya1 d1hxma1 d2x6ma\_  
d2e7la\_ d5e03a\_ d1qfwm\_ d2r0kh1 d1igjb1 d1rurh1 d1plgh1 d1mj8h1  
d1yuhb1 d3fmg1l d1rzf1l d1emt1l d1ad9b1 d1igtb1 d1n1bl1 d1d5ih1  
d3k7ua\_ d4ffyh\_ d1bwwa\_ d3dvga1 d1a6ta1 d1fgvl\_ d4qxgl1 d1mim1l  
d1jh1l\_ d2hffb1 d2hh0l1 d1qkzh1 d1l7t1l d1afvh1 d1iaii1 d2cjuh\_  
d1um5h1 d2ghwb2 d2ghwb1 d1kgce1 d2fgwh1 d1ikfh1 d1dvfd\_ d2i24n1  
d2xtjb\_ d1za3b1 d2yc1a\_ d2hh0h1 d2x1oa\_ d1bvka\_ d1rjla1 d5e7ba1  
d1igta1 d1il1b1 d2fb4l1 d1mvua\_ d1jpt1l d32c2a1 d1fvca\_ d1iqdb1  
d2hrph1 d2p4ab\_ d4qola\_ d1p2cb1 d1wt5c\_ d1t4ka1 d5c1mb\_ d1it9l1



d1bz7a1 d1b2wh1 d1e4w11 d1jnl11 d1yedb1 d1za6b1 d3u7aa\_ d1igfh1  
d3gnml1 d1orsa1 d1wejl1 d1a2ya\_ d1hxmb1 d1gafh1 d2j4wh1 d1pz5a1  
d1j05a\_ d1a3rh1 d4fq111 d1qfwh\_ d1eo8h1 d1n7mh1 d4s11a\_ d1kegh1  
d5da4a\_ d1iqw11 d3whxb1 d1vgeh1 d1deeb1 d1c12b1 d1t2q11 d1ad9a1  
d3gsnb1 d3b2uc1 d1ggbh1 d1t3fb1 d1nak11 d4ocmc\_ d1lila1 d2v7hb3  
d2esve1 d1mcoh1 d2qr0b1 d2q3aa\_ d1ct8a1 d1kcr11 d2pxyb\_ d2uzih\_  
d5c3ld\_ d3durb\_ d1c5cl1 d2ak4e1 d1dl7h\_ d1xiwd\_ d1mlba1 d1rmfl1  
d1i7zb1 d1dlfl\_ d2xa3a\_ d5bq7b1 d1dqqb1 d3h4211 d1legjh1 d1kcvl1  
d1fe811 d2j6e11 d1f3rb2 d1lk311 d1sm3h1 d1q0xh1 d1ghfh1 d7fab11  
d1igch1 d1lo0h1 d4idla\_ d5c2b1\_ d1jrh11 d1lilla1 d3zhda1 d4kfzc\_  
d1b0wa\_ d1e6oh1 d1mex11 d4krpb\_ d1fnsh1 d1ncwh1 d4hgma\_ d4eigb1  
d4rzca\_ d2mpa11 d4y5xa\_ d5en2b1 d3lrga1 d4ej1c1 d1rhha1 d1j05b\_  
d1forh1 d1q9wb1 d2wzpd\_ d2aq2a1 d1h0da1 d3revb1 d2ij0c1 d1tzh11  
d4m7j11 d1k6q11 d3b9kc1 d1igml\_ d3qeu1 d1dsfl\_ d1ce1h1 d1kcuh1  
d1zvha1 d1zvoa1 d1tqbb1 d1ay111 d2qsc11 d2cgrh1 d1n10h1 d1ken11  
d3eo0a1 d4n9ob1 d1n0x11 d3k1kc\_ d1prtc1 d2wv6d\_ d1prtfd\_ d1ltrd\_  
d4l63b1 d1r4pb\_ d1prtd\_ d1tl0f\_ d2bosa\_ d1prtb1 d3chbd\_ d2aq2b1  
d1ck1a1 d1lenfa1 d1i4pa1 d1vloa1 d1et9a1 d1esfa1 d2g9hd1 d4ohja1  
d1klud1 d1bxta1 d1eu3a1 d1ty0a1 d1fnua1 d2cqva1 d1fhga\_ d2k1ma\_  
d2dl2a1 d1biha3 d1biha1 d1biha4 d3qp3a1 d1g1ca\_ d1gxea\_ d1cvsc2  
d1cvsc1 d1xmwa2 d1m4ka2 d2otpa2 d1biha2 d1rhfa2 d2fcba2 d2fcba1  
d1gsma2 d1epfa1 d1epfa2 d2dava1 d1waaa\_ d1f97a2 d1x44a1 d1vcaa2  
d1fnla2 d1fnla1 d3b5ha2 d3h8na2 d3h8na1 d1jbja1 d1jbja2 d1pd6a\_  
d1f2qa2 d1f2qa1 d3cx2a\_ d1nbqa2 d3b5ha1 d1n26a1 d1xiwb\_ d1xaua\_  
d1fltx\_ d2ifga1 d1olla1 d1olla2 d1cs6a4 d1cs6a3 d1cs6a2 d1cs6a1  
d2gw5a2 d1sy6a1 d1xiwa\_ d1lucta2 d1lucta1 d1ry7b2 d1gl4b\_ d1qz1a3  
d1olza1 d2c9aa1 d1wwca\_

**Family-63 (c.37.1.12)**

**Positive dataset contains 19 protein sequences.**

d3g60a4 d1v43a3 d2wmfa1 d1vpla\_ d4a82a2 d2d62a1 d3tuic1 d2bbsa1  
d3g60a3 d2ixea\_ d1sgwa1 d2qi9c\_ d3rlfa1 d3b60a1 d3d31a2 d2pzea1  
g1xew.1 d2onka1 d1wlwa\_

**Negative dataset contains 3656 protein sequences.**

d1m32a\_ d1libja\_ d1c7na\_ d1iuga\_ d4q75a\_ d2bkwa1 d1t3ia\_ d1n8pa\_  
d1qz9a\_ d1jff9a\_ d1eg5a\_ d1p3wa\_ d3kgwa\_ d1cl1a\_ d2ctza1 d1vjoa\_  
d2rfva\_ d1cs1a\_ d1d2fa\_ d2ch1a1 d1qgna\_ d1pffa\_ d1elua\_ d1u08a\_  
d1lc5a\_ d1b5pa\_ d2ay1a\_ d1bw0a\_ d3pd6a\_ d7aata\_ d2csta\_ d1j32a\_  
d4wlha\_ d1o4sa\_ d1v2da\_ d1gdea\_ d1m6sa\_ d1v72a1 d1svva\_ d1ajsa\_  
d1wsta1 d2f8ja2 d1lk9a\_ d1vp4a1 d1xi9a1 d2gb3a1 d1yaaa\_ d1jx4a2  
d3gv5b1 d1t94a2 d3bq0a2 d3i2ka1 d1mpxa2 d1xkta1 d2hfka\_ d5d3ka\_  
d2cfba1 d1dfoa\_ d1o69a\_ d1bj4a\_ d3k28a\_ d2bwpa\_ d3lg0a\_ d2fnua\_  
d3ou5a\_ d1z7da1 d1b9ha\_ d1iaya\_ d4msoa\_ d1bs0a\_ d1s0aa\_ d1sffa\_  
d3tqxa\_ d1mdoa\_ d3qboa\_ d3pgya\_ d1bjna\_ d2dkja\_ d1ejia\_ d1vefa1  
d4wxga\_ d3bs8a\_ d3gbxa1 d1w23a\_ d1i26a\_ d1ddla\_ d1e57b\_ d1auyb\_

d3ljqa\_ g1k2x.1 d3ehbb1 d1fftb1 d1gyca3 d1hfua2 d1kbva1 d1kbva2  
d1sdda1 d1sdda2 d1gyca1 d1gyca2 d1mzya1 d2bw4a1 d1aoza1 d1aoza3  
d1aoza2 d1kyaa2 d1kyaa3 d1mzya2 d4e9sa1 d1sddb1 d1sddb2 d1hfua1  
d1hfua3 d1oe1a2 d1oe1a1 d1v10a2 d1v10a3 d1v10a1 g1f8v.1 d2bbvc\_  
d1a3qa1 d1iknc\_ d3brda1 d1p7h11 d1oy3c\_ d1imhc1 d1gjia1 d1zk9a1  
d2cxka1 d2bema\_ d1pama1 d1lea9c1 d1qhoa1 d2fhfa2 d2fhfa1 d1k3ia1  
d1j0ha1 d1cxla1 d2bhua1 d1edqa1 d1f1sa2 d1ut9a2 d1gvia1 d1txka1  
d2phla2 d2phla1 d1fxza2 d1fxza1 d1lrha\_ d1uija1 g1dgw.1 d2v09a\_  
d1uika2 d1uika1 d1dgwa\_ d2pa7a1 d1wlta1 d1nxma\_ d2c0za1 d1ds6b\_  
d1fstb\_ d1v70a\_ d2f4pa1 d1yhfa1 d1tafa\_ d1tafb\_ d1jfib\_ d1q9ca\_  
d1h3ob\_ d2byka1 d1n1ja\_ d4g92b\_ d1bh9a\_ d1jfia\_ d1h3oa\_ d2bykb1  
d1n1jb\_ d2bjca1 d2hsga1 d1qpza1 d1k9ua\_ d2opoa\_ d1r0ka3 d1j5pa3  
d1vkoa2 d1vm6a2 d3qvsa2 d1gr0a2 d3gpdg2 d2q49a2 d1hdgo2 d2g17a2  
d2cvoa2 d2czca1 d3pwka2 d1obfo2 d1i32a2 d1zyao2 d2pkqo2 d1b7go2  
d2hjsa2 d1cf2o2 d1vkna2 d1nvmb2 d2msya\_ d2djoa1 d2r5za\_ d1au7a1  
d1f43a\_ d2lmda1 d1akhb\_ d1s7ea1 d3nara\_ d1zq3p1 d2craa1 d1mija\_  
d4uuta\_ d3a01a\_ d1x58a1 d3rkqa1 d3cmya1 d2cqxa1 d2da6a1 d1e3oc1  
d1fjla\_ d1mh3a1 d1ig7a\_ d1x41a1 d1wh7a1 d1gt0c1 d2mw8a\_ d1lfup\_  
d1x2ma1 d1b72a\_ d1wi3a1 d1jgga\_ d1wjha1 d1x2na1 d1mnmc\_ d2cuea1  
d3k2aa\_ d2hosa\_ d2jwta2 d1pufa\_ d1oact1 d2hi3a\_ d1b8ia\_ d4j19a\_  
d3lnqa\_ d1wh5a1 d1b8ib\_ d2cqra1 d1guua\_ d1ug2a1 d2cqqa1 d2ajea1  
d4a69c\_ d1h8ac1 d2crga1 d2iw5b1 d1xc5a1 d1ofcx1 d2cu7a1 d1wgxa1  
d2cjjal d2ckxa1 d1gvda\_ d1mdwa\_ d1qxp4 d1ziva1 d1zcmal d1kv9a1  
d1jmx2 d1jmx1 d1pbya2 d1ig8a1 d1czan2 d1czan3 d1czan1 d1ig8a2  
d1czan4 d1bg3a4 d1bg3a3 d1bg3a2 d1nira1 d1qksa1 d1hroa\_ d4gedb\_  
d3zooa\_ d1mz4a\_ d1gu2a\_ d1f1fa\_ d1dvva\_ d1c6ra\_ d1c75a\_ d1e29a\_  
d1gdva\_ d1cnoa\_ d1h32b\_ d1co6a\_ d2bh4x\_ d2aiua\_ d5cytr\_ d1jdlal  
d1i8oa\_ d2zboa\_ d3dmia\_ d1ls9a\_ d1wvec\_ d2yk3a\_ d3ph2b\_ d1dw0a\_  
d5aura\_ d1ql3a\_ d1qn2a\_ d1f1ca\_ d4zzva\_ d2xspa\_ d1eg1a\_ d4v20a\_  
d1ojja\_ d4ipma1 d1gpia\_ d4csia\_ d3pfza\_ d3ovwa\_ d2yoka\_ d2nqya\_  
d1h4ga\_ d1hixa\_ d1oa2a\_ d1olra\_ d3b7ma\_ d4h7ma1 d3wp3a\_ d2vgda\_  
d1igoa\_ d3zsea\_ d2nlra\_ d3wx5a\_ d1oa3a\_ d1pvxa\_ d1m4wa\_ d1f5ja\_  
d1oa4a\_ d1ks5a\_ d4ixla1 d1h32a2 d1evsa\_ d1cnt1\_ d1pvhb\_ d1z7ca\_  
d1huwa\_ d1bgea\_ d1rhga\_ d1f6fa\_ d1f45b\_ d1ilrb\_ d1axia\_ d3tgxb\_  
d1scfa\_ d2z3qa1 d3qb1a\_ d1hula\_ d1m48a\_ d4nkqb\_ d1eera\_ d1v7mv\_  
d5e4ea\_ d2o27a\_ d3b5ka\_ d2psma1 d4zf7a\_ d3uf5a\_ d4x51a\_ d1d9ca\_  
d4ypgc1 d3oq3a\_ d1lqsl\_ d1aula\_ d1wu3i\_ d3bes1\_ d3ux9a\_ d1v8fa\_  
d2ejca\_ d3muea1 d1lihoa\_ d3q12a1 d3rbaa\_ d2qtra\_ d1nupa\_ d3l92a\_  
d1f9aa\_ d1qjca\_ d2h29a\_ d1vlha\_ d1od6a\_ d1lw7a1 d1mrza2 d4ruka\_  
d2el7a\_ d1iq0a2 d1irxa2 d1r6ta2 d1livsa4 d2cyba\_ d1rqga2 d1j09a2  
d2yxna\_ d1f7ua2 d1h3fa1 d1ffya3 d2g36a1 d1nzja\_ d1jila\_ d1n3la\_  
d1i6la\_ d1pfva2 d1h3na3 d3n9ia\_ d3sz3a1 d1cwva5 d3sw2a\_ d1moxc\_  
d1dx5i3 d1edmb\_ d1autl2 d1autl1 d1dval1 d1szba2 d1kigl\_ d2y5fl\_  
d1ijqa2 d1gk5a\_ d1g1sa2 d1nt0a3 d1xdtr\_ d1lmja2 d1lmja1 d1nzia2

d2wphe\_ d1klil\_ d1pfxl2 d1pfxl1 d1p9ja\_ d1glta2 d1f7ea\_ d4yzub\_  
d2mgpa1 d1b9wa1 d2mgpa2 d1oblcl d1oblcl2 d1nlia2 d1nlia1 d2npra2  
d2npra1 d1f56a\_ d1bypa\_ d1lazca\_ d1lws8a\_ d3u25a\_ d1cuoa\_ d1id2a\_  
d1rkra\_ d2iaac\_ d4dp1x\_ d1nwpa\_ d2gima\_ d2i7sa\_ d1qhqa\_ d1pvaa\_  
d3fs7a\_ d2pvba\_ d1ttxa\_ d1rwya\_ d2kyfa\_ d1rk9a\_ d1lexra\_ d1tiza1  
d1nyaa\_ d1g8ia\_ d1wdcc\_ d3fwba\_ d1ggza\_ d2o5ga\_ d1ctaa\_ d1m45a\_  
d3i5gc\_ d1sl8a\_ d1fpwa\_ d2scpa\_ d2roaa\_ d4agra\_ d3pn7b\_ d1br1b\_  
d2mysb\_ d1s6ca\_ d1bjfa\_ d2obha\_ d1jfkka\_ d1jfoa\_ d1qv0a\_ d1lkja\_  
d2mlfc\_ d2m97a\_ d2d8na\_ d4by5a\_ d1jbaa\_ d4nqga\_ d1wdcb\_ d2mysc\_  
d1j7qa\_ d1s6ia\_ d1uhka2 d1r2ua\_ d1dtla\_ d3kf9a\_ d3pn7c\_ d1qjta\_  
d1fi6a\_ d1c07a\_ d1gjya\_ d1y1xa\_ d1hqva\_ d1dvia\_ d1df0a1 d1qxp2  
d4usla\_ d1k94a\_ d1jfxa\_ d1wkya2 d1uuqa\_ d3wh9a\_ d4mlra\_ d1xyza\_  
d4xuya\_ d2je8a5 d4bf7a1 d3cuia\_ d1ur4a\_ d1qw9a2 d1odza\_ d2vzsa5  
d1bqca\_ d2x2ya1 d1hjqa\_ d1qnra\_ d4y7ea1 d1vjza\_ d4k68a\_ d2v3ga\_  
d4hpga\_ d1nofa2 d1nq6a\_ d1h4pa\_ d1aq0a\_ d3ziza\_ d4bs0a\_ d1ecea\_  
d1hl1na\_ d1ta3b\_ d1w91a2 d1ilwa\_ d1uhva2 d1us3a2 d1legza\_ d7a3ha\_  
d1tvna1 d3nyda1 d1ghsa\_ d2cyga1 d4xv0a\_ d2c8na2 d1w32a\_ d3emca\_  
d1v6ya1 d1foba\_ d2uwfa1 d2fgla\_ d3niya1 d2c0ha1 d1rh9a1 d1yq2a5  
d1szna2 d1fa2a\_ d1pama4 d5do8a1 d1ea9c3 d2fhfa5 d1qhoa4 d1avaa2  
d1m53a2 d4m8ua1 d2gjpa2 d1lwha2 d4howa1 d1ktba2 d1j0ha3 d3vm5a1  
d2x1ia\_ d1wzaa2 d1uasa2 d2diea1 d1mxga2 d1ht6a2 d1eswa\_ d1iv8a2  
d5cpsa\_ d1ud2a2 d1zjaa1 d3gbea1 d1kwga2 d1wdpa\_ d1gcya2 d1g5aa2  
d1hvx2a\_ d3dhpa2 d2bhua3 d4do4a1 d3qgva1 d1e43a2 d1g94a2 d2d3na2  
d1gjwa2 d1gvia3 d1x1na1 d1r7aa2 d1tz7a1 d4toqa\_ d1wb0a1 d1w9pa1  
d1eoka\_ d1itxa1 d1kfwal d1goia2 d1ledqa2 d2gsja\_ d1hjxa1 d1jnda1  
d1vf8a1 d3wdpp1 d3wq5a\_ d1gnxa\_ d4gxpa\_ d4hz8a\_ d1e4mm\_ d3aiua\_  
d1wcca1 d1qvba\_ d3ahxa\_ d1v02a\_ d2dgaa\_ d1pbga\_ d1vffa1 d1qoxa\_  
d4ha4a\_ d1e5wa2 d1j19a2 d1isna2 d2a16b2 d1b9ra\_ d1offa\_ d1ffra\_  
d3wcqa\_ d1l5pa\_ d1wria\_ d1i7ha\_ d3av8a\_ d1czpa\_ d1rfka\_ d3plma1  
d3b2ga\_ d2bt6a2 d3nvva1 d1krha3 d2h88b1 d1n62a2 d1t3qa2 d1kf6b2  
d1zoyb1 d1jq4a\_ d1ffva2 d1dgja2 d1rm6c2 d1h6ta1 d9ldta1 d2ewda3  
d1up7a1 d2dfda1 d1s6ya1 d7mdha1 d1hyea1 d1t2da1 d1ojsa3 d1b8pa1  
d1ldna1 d1hyha1 d1civa1 d2a92a1 d1ez4a1 d1i0za1 d1y6ja1 d1gv0a1  
d1ur5a1 d1ll1da1 d1obba1 d1v8ba1 d1gdha1 d1l7da1 d2dl1da1 d1mx3a1  
d1ygya1 d1li4a1 d1j4aa1 d2naca1 d1npya1 d3t4ea2 d1a4ia1 d1o0sa1  
d2hk9a2 d2egga2 d1b26a1 d1bvua1 d1gq2a1 d1cl1da1 d1leha1 d1gtma1  
d1euzal d1nvtal d3dona2 d1gpja2 d1vi2a1 d1p77a1 d1nyta1 d1b0aa1  
d1vl6a1 d1v9la1 d1txga2 d3f47a1 d1mv8a2 d2pv7a2 d1xc2a3 d2ahra2  
d4xiya1 d2f1ka2 d1pgja2 d1i36a2 d1np3a2 d1lj8a4 d1teaa3 d1qmga2  
d2i76a2 d2g5ca2 d1wdka3 d3cuma3 d1kola2 d1f8fa2 d1qora2 d1jqba2  
d1vj0a2 d1cdoa2 d1gu7a2 d1d1ta2 d1xa0a2 d2dm6a2 d1jvba2 d1rjwa2  
d1llua2 d1h2ba2 d1tt7a2 d1piwa2 d1o89a2 d1iz0a2 d1e3ja2 d1yb5a2  
d1uufa2 d1vj1a2 d1e3ia2 d3gpdg1 d1vc2a1 d2nvwa1 d1u8fo1 d1ydwal  
d1hdgo1 d2g17a1 d1cf2o1 d2czca2 d1r0ka2 d1obfo1 d2cvoa1 d1ebfa1

d1h6da1 d1i32a1 d1zh8a1 d2q49a1 d1qkia1 d3pzra1 d1xeaa1 d1vkoa1  
d1vm6a3 d3qvsa1 d2pkqo1 d1b7go1 d1gr0a1 d1p1ja1 d1lc0a1 d1j0xo1  
d3pwka1 d2hjsa1 d1zyao1 d1vkna1 d1tlt1a1 d1nvmb1 d3sjua\_ d3ojfa1  
d1xu9a1 d2jjya1 d1n7ha\_ d1y1pa1 d1h5qa\_ d1jtva\_ d4fs3a\_ d2bkaa1  
d1gy8a\_ d2c5aa1 d1ulsa\_ d1ooea\_ d2b69a1 d1y5ma1 d1spxa\_ d1aela\_  
d1bxka\_ d1ydea1 d1gega\_ d1hdoa\_ d1o5ia\_ d1e6ua\_ d1snya1 d2rhca\_  
d3zv4a\_ d5ceja\_ d2d1ya1 d1fjha\_ d3w8ea\_ d2fmua1 d1x1ta\_ d1lrpna\_  
d3ay7a1 d1k2wa\_ d1eq2a\_ d2hrba1 d3ruaa\_ d2ew8a1 d4hwka\_ d1xgka\_  
d2bd0a1 d1yo6a1 d2a35a1 d2ntva\_ d1vl8a\_ d1hdca\_ d4bkua\_ d2ag5a1  
d2q45a\_ d1nffa\_ d4iy1a\_ d1zbqa1 d1kewa\_ d1ek6a\_ d1ja9a\_ d2q46a2  
d1iy8a\_ d1cyda\_ d2ptga\_ d1hxha\_ d1uzma1 d3lyla\_ d4m89a\_ d3wyea\_  
d2b11a1 d1w6ua\_ d1sb8a\_ d2q2va\_ d4nr0a\_ d1e6wa\_ d2gasa\_ d3oiga1  
d2bgka1 d1mxha\_ d1vl0a1 d1rkxa\_ d1r6da\_ d1wmaa1 d1e7wa\_ d2c07a1  
d1xkqa\_ d3tzha\_ d1g0oa\_ d3lz6a\_ d1qyca\_ d1ledoa\_ d1gz6a\_ d1oc2a\_  
d1t2aa\_ d1zema1 d2xoxa\_ d1z45a2 d1geea\_ d1p33a\_ d3lt0a\_ d4e6pa\_  
d2wyua\_ d1db3a\_ d4q9na\_ d1xhla\_ d4o1ma\_ d1fmca\_ d2uvda\_ d2gdza1  
d1uaya\_ d2z1ma\_ d2o23a2 d2fr1a2 d2fr1a1 d1qsga\_ d1qyda\_ d4zjua\_  
d2a4ka1 d1yb1a\_ d1wvga1 d1yxma1 d3f4ba\_ d1mg5a\_ d1xg5a1 d1r55a1  
d3gboa\_ d1atla\_ d1kufa\_ d1buda\_ d4q11a\_ d1quaa\_ d1yp1a\_ d1wnia\_  
g1y43.1 d3nqyb\_ d4gera\_ d1bqba\_ d3u1ra1 d1g9ka2 d1kapp2 d1k7ia2  
d1t3ca\_ d1epwa3 d2a97a\_ d3fiea\_ g1e1h.1 d3ioqa\_ d1fh0a\_ d1o0ea\_  
d1khqa\_ d1m6da\_ d2cb5a\_ d1cs8a\_ g8pch.1 d1s4va\_ d2pnsa\_ d1vsna1  
d1mira\_ d1iwda\_ d2oula\_ d7pcka\_ d3bwka\_ d3bcna\_ d2p86a\_ d1pvja\_  
d1pcia\_ d1gece\_ d1deua\_ d4bs6a\_ d1xkga1 d1cqda\_ d1jqpa2 d2c0ya\_  
d2bdza\_ d3p5ua\_ d1zoya1 d1d4ca2 d1chua2 d1jnra2 d1kf6a2 d2jk6a2  
d2jk6a1 d1fecal d1fecal d1lpfa1 d1lpfa2 d1xhca1 d1xhca2 d1dx1a2  
d1dx1a1 d1gera2 d1m6ia2 d1onfa1 d1onfa2 d3lada2 d3lada1 d1w4xa1  
d1w4xa2 d1gesa2 d1mo9a1 d1xdia1 d1fl2a2 d1fl2a1 d1fcda1 d1fcda2  
d1h6va2 d1h6va1 d1mo9a2 d1gv4a2 d1gv4a1 d2gv8a2 d2gv8a1 d1aoga1  
d1aoga2 d1hyua1 d1ebda1 d1ebda2 d3dk9a1 d1q1ra2 d1q1ra1 d1gesa1  
d1zbfal d2z1ha\_ d2etja1 d3qioa1 d1j11a\_ d2e41a\_ d1j12a\_ d2lsna1  
d1uaxa\_ d2yv0x\_ d1mu2a1 d1ekea\_ d1i39a\_ d1o94a2 d1lqta1 d1cjca1  
d1pn0a1 d1ju2a1 d2f5va1 d3c96a1 d2gmha1 d1pj5a2 d1gpea1 d1o5wa1  
d1n4wa1 d1k0ia1 d2dw4a2 d2ivda1 d1seza1 d2voua1 d1kdga1 d1s5ja1  
d2hbja2 d2igia\_ d1wlja\_ d1qhta1 d4dlea1 d1tgoa1 d2f96a1 d3tr8a1  
d3mxma\_ d1q8ia1 d1y97a1 d1w0ha\_ d1kfsa1 d2py5a1 d1noya\_ d1d5aa1  
d1yt3a3 d2guia\_ d3mwpa1 d4kb1a\_ d2v76a\_ d1wj1a1 d1aqca\_ d1qqga2  
d1ntva\_ d1n3ha\_ d4dbba\_ d3f0wa1 d1p3ra\_ d1wgua1 d2cy4a1 d3hqca\_  
d1wvha1 d1xr0b1 d1v58a1 d1t3ba1 d4ilfa2 d4npba2 d1jmx4 d1jmx3  
d1pbya3 d1k8ka2 d1k8ka1 d3uleb1 d3i33a2 d3i33a1 d1bupa1 d1dkgd2  
d1dkgd1 d4ci6a2 d1jcfal d4a2ba2 d2fxua1 d1yaga2 d4cbua2 d1bupa2  
d1r7ha\_ d1faaa\_ d1wika1 d1xfla\_ d1ttza1 d2f51a1 d1ti3a\_ d1nhoa\_  
d1sena\_ d2i4aa\_ d1ep7a\_ d1zmaa1 d1fo5a\_ d3lefa1 d3diea1 d2yana1  
d1z6na1 d1oaza\_ d3zywa1 d4aj8a\_ d1nm3a1 d4fiwa\_ d1wmja\_ d4hs1a1

d1liloa\_ d1xwaa1 d1wjka1 d2vm1a\_ d1fb6a\_ d1gh2a\_ d1h75a\_ d1nw2a\_  
d1kx5b\_ d3a6na\_ d4m6ba2 d2nqbd\_ d3wkjd\_ d2yfwe\_ d4h9na\_ d5bnxa\_  
d1kx5c\_ d3r45a\_ d1eqzb\_ d4jjnb\_ d1f66c\_ d1eqza\_ d4wnnb\_ d1u35c1  
d1lid3a\_ d2nqbc\_ d1kx5d\_ d1ku5a\_ d1b67a\_ d2b5ea2 d2b5ea3 d2b5ea1  
d2b5ea4 d2kp1a1 d2kp2a1 d1hyua3 d1hyua4 d1j08a1 d1j08a2 d1pd212  
d1nhya2 d2a2ra2 d1k0dd2 d1f2ea2 d1gsua2 d1f3ba2 d2fhea2 d2pvqa1  
d1tw9a2 d1oyja2 d1e6ba2 d3ik7a1 d4is0a1 d1r5aa2 d1jlva2 d1m0ua2  
d3gtub2 d1z9ha2 d1okta2 d1axda2 d2gsra2 d1tu7a2 d1k3ya2 d1zgm1  
d1b48a2 d1gnwa2 d1gwca2 d2gsta2 d1glqa2 d1oe8a2 d1pn9a2 d1v2aa2  
d1fw1a2 d1duga2 d1iuka\_ d2csua1 d3q9ub\_ d2yv1a1 d3q9na\_ d2d59a\_  
d1oi7a1 d2yv2a1 d1euca1 d1y81a1 d1qqya\_ d1gd6a\_ d1f6ra\_ d1livma\_  
d2gv0a\_ d1iiza\_ d2z2fa\_ d1j8xa\_ d1gh1a\_ d1b9oa\_ d1741a\_ d1691a\_  
d2o4wa\_ d1p37a\_ d1k28a3 d1xjta1 d1jtma\_ d2f2qa\_ d4e97a1 d1iyka2  
d1iyka1 d1rxta1 d1iica1 d2za0a\_ d2c21a1 d1f9za\_ d2pjsa1 d1k11a\_  
d2i7ra1 d1ecsa\_ d1xqaa1 d5cj3a1 d1npba\_ d1jifa\_ d2p7oa\_ d1r9ca\_  
d1mpya2 d1kw3b2 d1kw3b1 d4ghga1 d1tfza1 d3isqa1 d3isqa2 d1sqia1  
d1sqia2 d1lkda2 d1lkda1 d1cjxa2 d1cjxa1 d1sp9b2 d1t47a1 d1t47a2  
d1f1ua2 d1sp8a1 d1sp8a2 d1f1ua1 d1etob\_ d1umqa\_ d1g2ha\_ d1s5ja2  
d1qhta2 d4dlea2 d1tgoa2 d3py8a2 d1q8ia2 d1kfsa2 d2py5a2 d1d5aa2  
d1qsta\_ d2beia1 d4m3sa\_ d1u6ma1 d1ygha\_ d1yk3a1 d3dr6a\_ d1xmta\_  
d1z4ea1 d2ge3a1 d1bo4a\_ d2fiaa1 d2jdca1 d1y9wa1 d3to7a\_ d1wwza1  
d2f14a1 d2ozua1 d2b5ga\_ d2cy2a1 d2p0wa\_ d1cm0a\_ d4pswa\_ d1yrea1  
d1yr0a1 d1m4ia\_ d2gana1 d1yvka1 d1ghea\_ d2g3aa1 d1y7ra1 d2euia1  
d1q2ya\_ d2fsra1 d1xeba\_ d2ae6a1 d1cjwa\_ d1qsm1\_ d2aj6a1 d1y9ka1  
d1i12a\_ d1vkca\_ d2atra1 d1n71a\_ d2d4pa1 d2fiwa1 d2fe7a1 d1tiqa1  
d2ou2a\_ d1yx0a1 d2fcka1 d1p0ha\_ d2j8ma\_ d2pq8a\_ d1z4ra1 d1s3za1  
d1ufha\_ d1gvfa\_ d3qm3a1 d2fjka\_ d1xvqa1 d1pn0a2 d3hy2a\_ d2cvba1  
d1o8xa\_ d1lu4a\_ d1we0a1 d2bmxa1 d2a4va1 d1psqa\_ d1xiya1 d1q98a\_  
d1n8ja\_ d1zofa1 d2ggta\_ d3tjja\_ d4jela1 d1o73a\_ d3s9fa\_ d2zcta\_  
d1qmva\_ d1jfua\_ d2b1ka\_ d5dvba1 d2b5xa1 d2v2ga\_ d1st9a\_ d3tb2a\_  
d411ra\_ d4fh8a1 d1e2ya\_ d2h30a\_ d1i5ga\_ d2z9sa\_ d2f8aa1 d1tp9a1  
d2b7ka\_ d1nm3a2 d3hvva\_ d2wfca1 d4kcea\_ d1xvwa1 d4gqca1 d3qpma\_  
d4k1fa\_ d1zzoa1 d1gp1a\_ d1prxa\_ d4od7a1 d1z6ma1 d4mcua1 d4dvca1  
d1r4wa\_ d3l9sa\_ d1un2a\_ d3rppa\_ d1rwl1a\_ d1z3ea1 d3l78a\_ d1rmka\_  
d1ixta\_ d1eyoa\_ d1cna1\_ d1fu3a\_ d1g1pa\_ d1f3ka\_ d1fyga\_ d1f74a\_  
d3l21a\_ d2e1da\_ d1to3a1 d1w3ia\_ d1sfla\_ d1n7ka\_ d1vcva1 d4imea\_  
d1wa3a\_ d2ocza1 d1f2ja\_ d3m16a\_ d2yxga\_ d1ub3a\_ d3a5fa\_ d1fbaa\_  
d1l6wa\_ d1xfba1 d1wx0a1 d1vpxa1 d1ojxa\_ d2a4aa1 d1xkya1 d3cq0a1  
d3s1xa\_ d1f05a\_ d1fdja\_ d3cpra1 d4d2ja\_ d1jgta2 d1ea0a3 d1ecfa2  
d1q15a2 d1ct9a2 d1ao0a2 d1te5a\_ d1ys1x\_ d4hs9a\_ d1ispa\_ d1ku0a\_  
d3qmma\_ d1n9wa1 d1bbua1 d1e1oa1 d1c0aa1 d1b8aa1 d3a74a1 d1eova1  
d2h1ia1 d2r8ba1 d3b5ea1 d3cn9a\_ d1auoa\_ d1lgya\_ d4l3wa\_ d1llfa\_  
d1gz7a\_ d1lukca\_ d2hqya1 d2hqya2 d1lrza2 d1ne9a1 d1ne9a2 d1cr6a2  
d3groa\_ d1thta\_ d1ei9a\_ d1ra6a\_ d1muka\_ d3gsza\_ d1khva\_ d1te9a\_

d2xwha\_ d3uqsa\_ d3hkwa\_ d3n6ma\_ d2cjqa\_ d2xyma\_ dlteba\_ dlte8a\_  
d1s48a\_ d1u09a1 d4wfxa\_ d3tyqa\_ d2pgga1 d3zxha\_ dlcgla\_ dlrm8a\_  
dleaka2 d1hy7a\_ d2jsda\_ d1cxva\_ d1hv5a\_ d1i76a\_ d3p0ya1 d1igra1  
d1igra2 d1n8yc1 d1m6ba2 d1m6ba1 d1sr9a2 d1rqba2 d2tbvc\_ d1c8nc\_  
d1x36a\_ d1smvc\_ d1ng0c\_ d4sbvc\_ d1lopa\_ d1f2nc\_ d1cixa\_ d1y29a\_  
d1v7fa\_ d2jtba\_ d1d1ha\_ d1g9pa\_ d1lupa\_ d1qk7a\_ d1mb6a\_ d2a2va\_  
d1niya\_ d1i25a\_ d2mpqa\_ d1ie6a\_ d1kqha\_ d1la4a\_ d2mxoa1 d1dl0a\_  
d1koza\_ d1qk6a\_ d1emxa\_ d1lqra\_ d1c6wa\_ d1js9c\_ d1f15b\_ d1za7a\_  
d1laja\_ d1rypd\_ d1irua\_ d1rypc\_ d3unfk\_ d1rypa\_ d1j2pa\_ d1irui\_  
d1j2qh\_ d3unfh\_ d1m4ya\_ d1rypb\_ d1irul\_ d1irug\_ d1iru2\_ d1q5rh\_  
d1rypg\_ d1g3ka\_ d1q5qa\_ d1e94a\_ d1irub\_ d1ryph\_ d3ty6a\_ d1iruj\_  
d1iruk\_ d1rype\_ d1irud\_ d1irue\_ d3mi01\_ d1rypf\_ d1iruh\_ d2z3ba\_  
d1iruc\_ d3mka2\_ d1irul\_ d1ny721 d1ny722 d1a6ca3 d1a6ca1 d1pgl22  
d1pgl21 d1pgl11 d1ny711 d1mqta\_ d1d4m3\_ d1fmd3\_ d2mev1\_ g1aym.1  
d1ev13\_ d4q4w1\_ d1r1a3\_ d2x5ia\_ d1rhi1\_ g1r1a.1 g1d4m.1 g1rhi.1  
d1b35b\_ d1lopa\_ d1tme1\_ d4iv1a\_ g1pvc.1 g1fpn.1 d1fpn1\_ d4gb31\_  
d1d4m1\_ d1fmd1\_ d1ev11\_ d2wzr3\_ g1cov.1 d1qqp3\_ g1fmd.1 d2x5ic\_  
d1rhi3\_ g1oop.1 d1hxs1\_ d1fpn3\_ d1bev1\_ g2mev.1 d1eah3\_ d1aym1\_  
d1pvc3\_ d1qqp1\_ d1zba3\_ d1h8ta\_ d3vbhc\_ g1b35.1 g1bev.1 d1hxs3\_  
g1ev1.1 d1bev3\_ g1tmf.1 d1tmf1\_ d1b35a\_ d2mev3\_ g1eah.1 g1h8t.1  
d1eah1\_ d4q4w3\_ d1r1a1\_ d1aym3\_ d1pvc1\_ d1zba1\_ d1h8tc\_ d1oopc\_  
d1tme3\_ g1qqp.1 d4iv1c\_ g1tme.1 d3ubub\_ d1legia\_ d1qo3c\_ d1v7pa\_  
d1tdqb\_ d3ubua\_ d1c3ab\_ d1h8ua\_ d3bx4b\_ d1t8ca1 d1sb2a1 d1qdda\_  
d2ziba1 d3cada\_ d1byfa\_ d1j34b\_ d1jwia\_ d1jzna\_ d1c3aa\_ d1oz7b\_  
d1wmza\_ d3bdwb\_ d1hq8a\_ d1fifa1 d1dv8a\_ d3hupa\_ d1wk1a1 d1umra\_  
d2afpa\_ d3bx4a\_ d1gz2a\_ d1s16a\_ d1v7pb\_ d3g8ka\_ d1ixxa\_ d1j34a\_  
d1jwib\_ d1g1sa1 d1y17a1 d1ja3a\_ d1fvub\_ d3bdwa\_ d1sb2b1 d1fvua\_  
d1umrc\_ d1oz7a\_ d4m17a\_ d3cfwa1 d1ypqa1 d1g1ta1 d3fd4a\_ d3l9jc\_  
d4dn8a1 d1v41b\_ d1rd11\_ d2msba\_ d4w9ta\_ d1jvna1 d4x2ra1 d1qo2a\_  
d4axka1 d1thfd\_ d1h5ya\_ d4u28a\_ d2y88a\_ d4wd0a\_ d1vzwa1 d3exra\_  
d2ffca1 d2fdsa1 d3n3ma1 d2czda\_ d1q6oa\_ d2yyua\_ d1vqta1 d1dbta\_  
d3ldva1 d2flia1 d1rpxa\_ d1tqja\_ d1tqxa\_ d1ux8a\_ d1dlya\_ d4i0va\_  
d2bkma\_ d2bmma\_ d2r80b\_ d1cqxa1 d1cg5a\_ d1gcvb\_ d3boma\_ d2h8fb\_  
d2raoa\_ d3bj1a\_ d4hrrb\_ d2r50a\_ d3d1kb\_ d2aa1b1 d3zhwa\_ d3hf4b\_  
d3gdja\_ d1jebb\_ d3bj1b\_ d1x9fb\_ d1wmub\_ d1gcva\_ d3bcqb\_ d3d4xb\_  
d1gvha1 d2dc3a\_ d3hf4a\_ d4yu3a\_ d3k8ba\_ d1qpwb\_ d2r80a\_ d3bcqa\_  
d1v4wa\_ d3wtgb\_ d1j17a\_ d4esaa\_ d1a9we\_ d3d1ab\_ d1fsla\_ d4h21a\_  
d1v4wb\_ d1mwca\_ d1vhba\_ d1jeba\_ d1spgb\_ d1h97a\_ d1q1fa\_ d1tu9a1  
d3d1aa\_ d1hdsb\_ d3hyub\_ d2zfb\_ d3fs4a\_ d1oj6a\_ d1shrb\_ d4h21b\_  
d4yu3b\_ d1spga\_ d3hrwa\_ d3qqra\_ d3at5a\_ d4wchd\_ d3hyua\_ d1cg5b\_  
d1uc3a\_ d1hbra\_ d2raob\_ d4esab\_ d3gdjb\_ d3qqqa\_ d1x9fc\_ d3vrfa\_  
d1litha\_ d3mkba\_ d3d4xa\_ d3mjpa\_ d1j16a\_ d3fh9a\_ d1louta\_ d2dc3b\_  
d1lit2a\_ d3eoka\_ d3g46a\_ d1qpwa\_ d3vrfb\_ d1ch4a\_ d1x9fd\_ d1hdsa\_  
d2zfa\_ d3mkbb\_ d1or4a\_ d3wtga\_ d1a4fa\_ d3fh9b\_ d3bomb\_ d3cy5a\_

d3at5b\_ d1x9fa\_ d2oifa\_ d4lmbx\_ d1cpcb\_ d3v57a\_ d1kn1a\_ d1cpca\_  
d4f0ta\_ d2vjha\_ d4po5b\_ d1eyxa\_ d1alla\_ d4f0tb\_ d1b33b\_ d1b8db\_  
d4h0mb\_ d1b33a\_ d2vjhb\_ d4lm6b\_ d2vmlb\_ d1allb\_ d2vjta\_ d3dbja\_  
d2vmla\_ d2vjtb\_ d4f0ub\_ d1f99b\_ d4rmpa1 d1lliaa\_ d1leyxb\_ d2uulb\_  
d4lmsb\_ d4f0ua\_ d2bv8a\_ d1f99a\_ d2bv8b\_ d2c71b\_ d3dbjb\_ d4rmpb1  
d1b8da\_ d4h0ma\_ d3v57b\_ d1liab\_ d2uula\_ d2j96a\_ d3ia2a\_ d1a88a\_  
d4dgqa1 d1zoia\_ g1gxs.1 g1wht.1 d4ekfa\_ d2ckga\_ d1th0a\_ d2bkra\_  
d1azwa\_ d2xqfa\_ d1ea5a\_ d1f6wa\_ d1dx4a\_ d1qe3a\_ d1k4ya\_ d4qwwa\_  
d2ha2a\_ d3c8da2 d2pbla1 d1jkma\_ d1jjia\_ d1lzlzla\_ d2qvba\_ d2v9za\_  
d4kafa1 d4iuua3 d4bvva\_ d5hpga\_ d3k65a\_ d1ki0a3 d1ki0a2 d1ki0a1  
d1a0ha1 d1pmla\_ d3sp8a3 d2feba1 d1xova2 d2m5ta\_ d1cqqa\_ d1wqsa\_  
d5bpea\_ d2ipha\_ d2bhga1 d3tnta\_ d3sjia\_ d3d23a1 d2fyqa\_ d3tloa\_  
d3zvea1 d2hrva\_ d3q3ya1 d4asha1 d1e88a1 d1l6ja5 d1l6ja4 d1leaka4  
d1l6ja3 d1h8pa2 d1h8pa1 d3rp2a\_ g1lucy.1 d1fuja\_ d2zchp\_ d3w94a\_  
d1si5h\_ d1lo6a\_ g2pka.1 d1cgha\_ d1kigh\_ d1a5ia\_ d3s9ba\_ d1hj8a\_  
d1ao5a\_ d2anya\_ d1q3xa1 d1gvza\_ d1azza\_ d4gsoa\_ d2f91a1 d1liaua\_  
d1gdna\_ d1eufa\_ g1fiw.1 d1eq9a\_ d4nfea\_ d2rdla\_ d1spja\_ d1elva1  
d1a7sa\_ d1ekbb\_ d1pfxc\_ d1yc0a\_ d2aiqa\_ g1fiz.1 d1fi8a\_ d4k60a\_  
d4dgja\_ d1mzaa\_ d1op0a\_ d3tjva\_ d1pytd\_ d1sgfg\_ g1gg6.1 d2eeka\_  
g1rtf.1 d1a0ja\_ d3g01a\_ d1pytc\_ d4e7na\_ d1ddja\_ d1z8ga1 d2hlca\_  
d1npma\_ d1brup\_ g1jou.1 d1sgfa\_ d1autc\_ g2hnt.1 g1kdq.1 d1orfa\_  
d3s69a\_ d4crga\_ d1fxya\_ d2ftba\_ d1pmpa\_ d2rcqa1 d1fdqa\_ d4lkpa\_  
d1sa8a\_ d1vyfa\_ d1lpja\_ d3vg7a1 d4azqa1 d1o8va\_ d5bvqa\_ d1p6pa\_  
d2qo4a\_ d1opba\_ d1yiva1 d1o1va\_ d4bvma1 d4tkba\_ d4i3ba\_ d1bwya\_  
d1ftpa\_ d1ggla\_ d4gkca\_ d3p6da1 d1kqwa\_ d2a0aa1 d1dzka\_ d4t1ja\_  
d2a2ua\_ d4wfva\_ d3t1da\_ d4iaxa\_ d3zq3a\_ d2nnda\_ d1i4ua\_ d1kxoa\_  
d1bbpa\_ d1kt7a\_ d1exsa\_ d3s26a1 d1l1f7a\_ d4gh7a\_ d1z24a1 d1qabe\_  
d1xkia\_ d1ew3a\_ d3bx7a\_ d4iawa1 d1n0sa\_ d1gkab\_ d3kzaa\_ d2k23a\_  
d219ca1 d2joza1 d1gm6a\_ d3kffa\_ d3saoa1 d1e5pa\_ d1yupa1 d1iiua\_  
d3lgia\_ d3i77a\_ d2z9ia2 d4nsva\_ d1lcya2 d4jcna\_ d1agja\_ d1os8a\_  
d1hpga\_ d1p3ca\_ d1l1ja\_ d1qtfa\_ d2i49a\_ d1nnfa\_ d1xvxa\_ d1ursa\_  
d1h3da1 d1iuda\_ d4m1va1 d1twya\_ d3e13x\_ d2nxoa1 d4pfua\_ d3ttma\_  
d1elja\_ d2qmwa1 d1us5a\_ d1y3na1 d1jeta\_ d1uqwa\_ d4f19a1 d2esna2  
d3thia\_ d3fasa1 d2uyeb\_ d2xwva1 d1r91a\_ d2fyia1 d1pb7a\_ d2ozza1  
d1sw5a\_ d1nh8a1 d1vr5a1 d2g29a\_ d1xs5a\_ d3lswa\_ d2z23a\_ d3w9va\_  
d3tcha\_ d1q35a\_ d1z7me1 d3q27a\_ d1p99a\_ d1ve4a1 d2i6ea1 d4mcoa1  
d4n8ya\_ d1eu8a\_ d1zbma1 d1hsla\_ d1lixca2 d1j1na\_ d1xvya\_ d1y9ua\_  
d2z22a1 d1xoca1 d4oera\_ d1wdna\_ d5f1qa1 d1xt8a1 d1i6aa\_ d4gwoa\_  
d4igta1 d1pc3a\_ d4mmpa1 d1o63a\_ d2czla1 d2onsa2 d4mija1 d1eh3a\_  
d3skpa\_ d1dtza1 d1dtza2 d1ieja\_ d1jnf2a1 d1ce2a1 d1jnf1a1 d1b1xa2  
d1b1xa1 d1jw1a1 d1jw1a2 d1ryoa\_ d1h76a1 d1h76a2 d1etha2 d1w52x1  
d2ppla1 d1hpla2 d1lpbb2 d2oxea1 d1bu8a2 d1rp1a2 d3q3ma\_ d1za0a1  
d1mxra\_ d2inca\_ d1jk0a\_ d2incb\_ d1mhyb\_ d3hf1b\_ d1mtyb\_ d1r2fa\_  
d2uw1a\_ d1mhyd\_ d3n37a\_ d1oquc\_ d1syya\_ d1mtyd\_ d2o1za\_ d1uzra\_

d1smsa\_ d2fkza\_ d1zuja1 d1s3qa1 d2fjca1 d1z6om1 d1veia\_ d4dyya\_  
d1jiga\_ d3gvya\_ d2pyba\_ d4cy9a1 d3bvfa1 d1r03a\_ d2cf7a\_ d1nf4a\_  
d1zs3a1 d4iwka\_ d3ka8a\_ d3np0x\_ d1n1qa\_ d11b3a\_ d4e6ka\_ d1z6oa1  
d2fzfa1 d4dyua\_ d3ge4a\_ d1jgca\_ d4am4a\_ d2z6ma\_ d1ji5a\_ d1vlga\_  
d11koa1 d1krqa\_ d3qz3a\_ d1o9ra\_ d2ffxj\_ d1yv1a1 d2v2pa\_ d1j30a\_  
d4di0a\_ d1dpsa\_ d1oewa\_ d2qzxa\_ d2asia\_ d1psoe\_ d1smra\_ d2h6ta\_  
d1pfza\_ d1lizda\_ d3hd8a\_ d1j71a\_ d1dpja\_ d4aa9a\_ d1t6ex\_ g1b5f.1  
g1lya.1 g1htr.1 d1qdma2 d1bxoa\_ d1wkra\_ d1tzsa\_ d1libqa\_ d2qzwa\_  
d1ex4a2 d1c6va\_ d1bdqa\_ d3ggta\_ d3ixoa\_ d1mrxa\_ d2haha\_ d1tw7a\_  
d4njsa\_ d1sgua\_ d2p3da\_ d1nsoa\_ d3d3ta\_ d2rkfa\_ d1c6ya\_ d2rspa\_  
d3ogpa\_ d3ekwa\_ d2o4na\_ d2j9ja\_ d1baia\_ d3ggua\_ d3lzua\_ d4npua\_  
d4j55a\_ d2r8na\_ d2fxda\_ d2p3ca\_ d4dqea\_ d3ttpa\_ d3t3ca\_ d2p3aa\_  
d2hc0a\_ d2fdda\_ d3mwsa\_ d117ya\_ d1lepwa1 d1wgqa1 d1v89a1 d2codal  
d1zc3b\_ d1wg7a1 d1u5ea1 d1v61a1 d2coca1 d2ys1a1 d1v5pa1 d1ntya2  
d1wjma1 d1wi1a1 d1u29a\_ d1xx0a1 d1unqa\_ d2zkmx3 d1fhoa\_ d1v88a1  
d2adza1 d1x1fa1 d1p6sa\_ d2coaa1 d1btka\_ d1v5ma1 d1faoa\_ d2x18a\_  
d1dyna\_ d1x1ga1 d4kaxb\_ d2j59m1 d1kilb2 d1xcga2 d1txda2 d1u5da1  
d1dbha2 d1wlha\_ d1upqa\_ d1v5ua1 d1foea2 d2fjla1 d1eaza\_ d2dfka2  
d2cofa1 d1kz7a2 d1g66a\_ d1qoza\_ d5ajha1 d2h0ba\_ d2erfa\_ d1h30a2  
d3mw4a1 d1pz7a\_ d2r1ba\_ d3v64a1 d1d2sa\_ d3bopa1 d3mw3a1 d1okqa1  
d1okqa2 d1dszb\_ d1a6ya\_ d3cbba\_ d1ynwa1 d1r4ia\_ d1hcqa\_ d2hana\_  
d2hanb\_ d2enval d1kb4b\_ d2n11b\_ d1cita\_ d1adqa1 d1fnga1 d1uvqb1  
d1zs8a1 d2vola1 d2vola2 d1mfbl2 d2jelh2 d1uwel2 d3qq4b1 d1kjob\_  
d1k5na1 d1osph2 d4odhl2 d1ow0a1 d1ow0a2 d1bfob2 d319ra2 d3jtt1  
d2fath2 d4elkb2 d1fn4b2 d2xfxb\_ d1pg7x2 d4k71b2 d11k2a1 d1eapb2  
d41fhg2 d1i4fa1 d2nw2a2 d1kfah2 d1mhca1 d1h3ua1 d1wejh2 d1h0db2  
d1a5fh2 d1kcvh2 d1mjuh2 d1qqda1 d1kcrh2 d1k8ia1 d3huja2 d2nnab1  
d1nfd2 d3mffb2 d1s9va1 d11k3h2 d1q0xl2 d1fv1b1 d1neza1 d4rfeb2  
d1r3ha1 d1a6tb2 d1kjva1 d1pz5b2 d1onqa1 d2bc4a2 d1de4a1 d1k8da1  
d1tcra2 d1dn0b2 d1nfd2 d2xwtb2 d1bfoa2 d1mexh2 d1iakb1 d1ypzf2  
d4f7ea2 d1q72l2 d2fbjh2 d1fe8h2 d1clzh2 d1fngb1 d1uvqa1 d1vgka1  
d1c16a1 d4j12a2 d4x99b2 d1igtb3 d1je6a1 d1q72h2 d1nldh2 d1teth2  
d2hmic2 d1i1ca2 d1i1ca1 d1k8ib1 d1q0yh2 d1kfa12 d3frua1 d1pg7w2  
d1u58a1 d1igyb4 d1igyb3 d1hyrc1 d1klub1 d1deeb2 d1c12b2 d2bc4b2  
d2ig2h2 d1kcvl2 d3wn5b1 d11k2b\_ d11k3l2 d1mju12 d1sm3h2 d1q0xh2  
d1zvsal d1ydpal d1u8ib2 d1ypze2 d1kcu2 d1svpa\_ d1mbma\_ d3su6a1  
d1cula1 d4agka\_ d1vcpa\_ d1q31a\_ g1n11.1 d3e90b\_ d1ep5a\_ d3u1jb\_  
d2e3fa\_ d1mm0a\_ d2e3ea\_ d2l1da\_ d2ny8x\_ d2e3ga\_ d2ny9x\_ d2nz3a\_  
d21j7a\_ d1n4na\_ d2m8bb1 d2kyqa\_ d3psma\_ d1jkza\_ d1jxca\_ d2g11a\_  
d4uj0a\_ d2k4ua\_ d1hp2a\_ d2lu9a\_ d1baha\_ d2meoa1 d1wm7a\_ d1hlya\_  
d1n8ma\_ d1j1za\_ d1wpda\_ d1c55a\_ d1pvza\_ d1wt7a\_ d1rjia\_ d1wz5a\_  
d1m2sa\_ d1pjva\_ d1c49a\_ d2ktca1 d1wmta\_ d1du9a\_ d1j5ja\_ d1rlga\_  
d1c4qa\_ d1prtcl d2wv6d\_ d1prtfl d4l63b1 d1r4pb\_ d1prtd\_ d1tl0f\_  
d2bosa\_ d1prtb1 d3chbd\_ d1t0za\_ d2i61a\_ d1t1ta\_ d1sn4a\_ d1kv0a\_



d2lkba\_ d1npia\_ d1wwna\_ d1pe4a\_ d2kbka\_ d2li7a\_ d1djta\_ d2kbha\_  
d1dq7a\_ d1sega\_ d1omya\_ d1zywa1 d1jzaa\_ d1bnla\_ d1dy2a\_ d1iyjb4  
d1iyjb5 d1iyjb3 d1o7ia\_ d4ipca1 d1x3ea\_ d4apva\_ d1jb7a1 d1jb7a2  
d1jb7a3 d3kdfa\_ d1ue1b\_ d1wjja1 d3eiva\_ d1xjva2 d1xjva1 d2ccza2  
d1se8a\_ d1lloc\_ d1jb7b\_ d1qvca\_ d3ulla\_ d1qzga\_ d1miua4 d1miua5  
d1miua3 d3g48a1 d1gd7a\_ d1mkha\_ d1jjcb3 d1pyba\_ d1y14b1 d2nn6i1  
d1i94l\_ d2zjra2 d1smxa\_ d2qamc2 d1hh2p1 d2r7da1 d1rl2a2 d1wfga1  
d3bzka4 d1x6oa2 d3a0ja\_ d2j01d2 d2ja9a1 d4ql5a\_ d1hr0w\_ d1luza\_  
d2n3sa\_ d2vnud1 d1h95a\_ d1go3e1 d2nn6h1 d1ne3a\_ d2mola\_ d1iz6a2  
d1jjga\_ d1e3pa2 d2ix0a3 d2ix0a2 d2lxja\_ d1ueba3 d1ueba2 d2z0sa1  
d1u0la1 d2ix0a1 d2eifa2 d2je6i1 d3i2za1 d2c35b1 d2ahob2 d1t9ha1  
d3i4oa\_ d2qall1 d1jt8a\_ d2nn6g1 d1g6pa\_ d3cama\_ d1i94q\_ d1d7qa\_  
d2ba0a1 d2vnud2 d2vnud3 d1khia2 d2qalq1 d1wi5a1 d1xtda2 d1ny4a\_  
d1dgsa2 d1fvia1 d1p16a1 d1x9na2 d2a1ka\_ d1je5a\_ d1rpma\_ d2shpa1  
d1yfoa\_ d2ooqa1 d1g4us2 d1p15a\_ d1lara2 d1lara1 d1wcha\_ d2fh7a2  
d2fh7a1 d1ohea2 d2f4da\_ d1rxda\_ d2hxpa\_ d1xria\_ d1d5ra2 d1fpza\_  
d3ezza\_ d4y2ea\_ d1i9sa\_ d3azya\_ d3wvja\_ d1upsa1 d1ajoa\_ d2hyka\_  
d1ajka\_ d2vy0a\_ d1o4ya\_ d3o5sa\_ d3d6ea\_ d3atga\_ d1dypa\_ d1umza\_  
d3i4ia\_ d1c1la\_ d41bqa\_ d1a78a\_ d1slta\_ d4no4a\_ d3zsja\_ d3duia\_  
d1is3a\_ d1qmja\_ d1hlca\_ g1qmo.1 g1len.1 d3zyra\_ d1fnya\_ d1n47a\_  
g21tn.1 d1avba\_ d3usua\_ d1dhkb\_ d1f9ka\_ d1lukga\_ d1g8wa\_ d1g9fa\_  
d3wcsa\_ d1g7ya\_ g1loe.1 d1mvqa\_ d1hq1a\_ d1v6ia\_ d1dbna\_ d1qnwa\_  
d1fx5a\_ d4l8qa\_ d1ioaa\_ d3n35a\_ d3ubra\_ d1qo8a1 d1d4ca1 d2k3va\_  
d1ft5a\_ d1qdba\_ d2j7aa\_ d1h21a\_ d1ogyb\_ d4fasa\_ d1jnia\_ d1oaha\_  
d1sp3a\_ d3h33a\_ d1rwja\_ d19hca\_ d1os6a\_ d3bxua\_ d3h4na\_ d1i77a\_  
d1j0pa\_ d2ctha\_ d1duwa\_ d1ofwa\_ d2e84a\_ d1hh5a\_ d1gyoa\_ d3h34a\_  
d1wioa4 d1ccza2 d1vcaa1 d1dr9a2 d1ic1a1 d2d9qb1 d2nxyb2 d2dara2  
d2dara1 d1wyha2 d2dloa2 d1rutx4 d1rutx3 d2cuqa2 d1x41a2 d1x41a1  
d1x3ha2 d1x3ha1 d2d8za1 d1x61a2 d1x6aa1 d1x6aa2 d2cora2 d2cora1  
d1v6ga1 d1v6ga2 d2d8za2 d1x64a1 d1x64a2 d1b8ta1 d2co8a1 d1x63a2  
d2dj7a2 d2dj7a1 d2cu8a2 d2cu8a1 d1g47a2 d1g47a1 d1j2oa1 d1wyha1  
d2dloa1 d1wiga1 d1wiga2 d2cupa2 d2cupa3 d1x68a1 d2d8ya2 d2d8ya1  
d1m3va2 d1x62a1 d1x68a2 d1x61a1 d1b8ta3 d1b8ta2 d2d8xa2 d2d8xa1  
d1x4ka1 d1x4ka2 d2cuqa1 d1m3va1 d2co8a2 d1x63a1 d2cura1 d2cura2  
d1x62a2 d1op9a\_ d1y0la1 d1etzb1 d1legj11 d2gsib1 d1nj9a1 d4jfhd1  
d1aqk11 d1t2ja\_ d1lo4h1 d1zvya1 d3v4v11 d4enec1 d1kxtb\_ d5e8ea1  
d2pxya\_ d4weud\_ d1xiwc\_ d2esvd1 d1qznh\_ d1ogae1 d1f4xh1 d4n1hb\_  
d3ezjb1 d3mlw11 d1kfah1 d1etza1 d1b4jh1 d3cfic\_ d4w68a\_ d2arja1  
d1ek3a\_ d2ok0l1 d1vera\_ d1uwgh1 d1blnb1 d1fpth1 d1rzga1 d2giya1  
d4m3kb1 d1nc2a1 d2nyyd1 d1ncna\_ d1fbih1 d5dxwa\_ d4fqqa1 d1dqdh1  
d1jfq11 d1kelh1 d1faih1 d1frgl1 d1figl1 d4m6n11 d1fo0a\_ d4hxb11  
d3b5ga\_ d3quyd1 d2h9gb1 d1i8kb\_ d2dd8h1 d2ck0h1 d1eaja\_ d4w6wb1  
d2a6ib3 d1t66d1 d2e27h\_ d1ob1b1 d1f11b1 d2v7na1 d1ad0a1 d2xt1b1  
d1pskh1 d4i13b1 d2op411 d1a0q11 d1uwel1 d1za3a1 d1ncb11 d4uu9a\_

d1bm3h1 d1cloh1 d1nqba2 d1cf8h1 d4y5va\_ d1mhph1 d5anma1 d4cdgc1  
d4ldeb\_ d1y0lb1 d2pcpb1 d1z3gl1 d1dfb11 d1fh5h1 d3g5xa1 d1tzib1  
d4dn3l1 d3zhka1 d2b1hh1 d2uyla1 d1f3dh1 d1nj9b1 d2agjh1 d2h1pl1  
d1q72h1 d8fabbb1 d1ndmb1 d1rjca1 d4u6hb1 d3upca\_ d2fbj11 d1osph1  
d1tvda\_ d2cjev\_ d4fhbd1 d1bd2d1 d1rz7h1 d3nn8a\_ d1blna1 d1knoa1  
d1nfdal d2bmkb1 d1dq11\_ d1igyb1 d1igf11 d12e8h1 d3utza1 d1nc2b1  
d1rihh1 d4mwfb1 d4jvpa1 d1mieh1 d1rhfa1 d1fgn11 d1sbsh1 d1lp9e1  
d1dn0a1 d4lqf11 d1iaih1 d1kgcd1 d1mh5b1 d1gpol1 d2g60h3 d1f8t11  
d2jixd1 d4grwh\_ d1fo0b\_ d1bfob1 d1axsa1 d1u9ka\_ d1nmbh\_ d1h8na1  
d1h8na2 d1jguh1 d4eura1 d3sdy11 d35c8h1 d1w7211 d1mvub\_ d1i9rh1  
d1obla1 d4wenb\_ d1yeeh1 d3ietc1 d1f58h1 d1ad0b1 d1mqk1\_ d1nbvh1  
d4b50a\_ d3r8bb\_ d1baf11 d1mamh1 d4rgne1 d2gsgb\_ d35c811 d1bafh1  
d1ai1h1 d2pcpa1 d2fath1 d2x1pa\_ d1orsb1 d1ibgl1 d1shma\_ d1a2yb\_  
d1u0qa\_ d2coqa\_ d1hilb1 d1qfwi\_ d1jv5b\_ d1fn4b1 d5e0qa\_ d1nsnh1  
d1plgl1 d4ocxl1 d1kb5h1 d1rzfh1 d1pg7x1 d2fx7h1 d2oi9c\_ d1l7i11  
d3eyva1 d1d5i11 d4ffyl\_ d1a6wh\_ d1ac6a\_ d3dvfa\_ d1nfdel d1mimh1  
d1ri8a1 d1jhlh\_ d3dura\_ d1fskb1 d1f97a1 d3so3b1 d2ak4d1 d1lp9f1  
d4z7wf1 d1l7th1 d4y5ya\_ d4x7ec1 d1emth1 d1ikf11 d1nlbh1 d4utal1  
d1bjma1 d1eapb1 d1u6ah1 d2dtgd1 d1kj2b\_ d1xeda1 d1cleh1 d1fgvh\_  
d2bnub1 d2fb4h1 d2dtgb1 d1ktrh\_ d1jpth1 d1qkz11 d4hepg\_ d2atpb1  
d1flrh1 d2hrpl1 d1mvfa\_ d1iaim1 d3k80a1 d2jb5h1 d3zkxc\_ d4grwe\_  
d1it9h1 d1rhhb1 d3w9ec\_ d1e4wh1 d1sy6h1 d2j6eh1 d3qxta\_ d1jglh1  
d1p7ka1 d1tzhb1 d4n8pa1 d1gaf11 d2jelh1 d1wioa2 d4i0cc1 d1cicb1  
d1lmka2 d1lmka1 d1iqwh1 d1lorqb1 d1ejoh1 d1jnlh1 d4zg1a\_ d43c9b\_  
d1ggb11 d1wejh1 d3q6fa1 d1f3dj1 d3c6la1 d1bqlh1 d3p9wb\_ d1a3r11  
d1h0db1 d2uzil\_ d1eo811 d1qfwl\_ d1n7ml1 d1igja1 d1c5ch1 d2a9mh\_  
d1rmfh1 d1fj1b1 d4heme\_ d1ccza1 d1a5fh1 d1ogad1 d1dlfh\_ d1qa9b\_  
d1vge11 d3qskb\_ d1sjxa\_ d4ozfg1 d1sq2n\_ d1qd0a\_ d1kcvh1 d1c5db1  
d3qcul1 d8faba1 d3bn9d1 d1mjuh1 d4y8dc\_ d7fabh1 d3dvgb1 d1lo011  
d1a6tb1 d1gigh1 d1kcrh1 d2hwz11 d1yjdc1 d3clfl1 d4krna\_ d1d171\_  
d1e6ol1 d1mexh1 d3r0ma\_ d4kkna\_ d1fns11 d1loaqh\_ d1rzia1 d1ucbh1  
d1ncw11 d4b41a\_ d1nfd11 d2mpah1 d2d7t11 d4grwf\_ d4b5ea\_ d1lk3h1  
d3u79a\_ d4u3xa\_ d1ghf11 d1bvkb\_ d1mcww1 d1b88a\_ d1jrhh1 d32c2b1  
d4wemb\_ d1dsfh\_ d1op3h1 d1ce111 d1iqda1 d1qoka1 d1qoka2 d1qfuh1  
d2crya1 d1ay1h1 d1loaql\_ d3ab0b\_ d1rur11 d1t4kb1 d1bz7b1 d1n0xh1  
d1for11 d1ucbl1 d4w6yb\_ d43c9a\_ d2aab11 d1tzia1 d4n1ca\_ d1k6qh1  
d3g9ab\_ d4tvsa1 d1igmh\_ d1pz5b1 d3dx9a1 d3wxwh\_ d1nakh1 d1kcull1  
d3eaka\_ d4qlra1 d1cr911 d1d9ka\_ d1f4x11 d1deea1 d2i27n2 d1c12a1  
d2orbl1 d1j8hd1 d1mcph1 d1c5da1 d1kenh1 d1bd2e1 d1h5ba\_ d4x7fc1  
d3upaa\_ d1t3fa1 d1indh1 d2dtgc1 d4hc111 d1zv5a1 d4wgvb\_ d1uwgl1  
d4f37k1 d1aqkh1 d1vesa\_ d3zkqd\_ d1fpt11 d1lo411 d1knob1 d3rrqa\_  
d1ct8b1 d4orz\_ d1mlbb1 d4hgkc1 d1dqd11 d1bogb1 d4ozhe1 d1dr9a1  
d1i7za1 d1dn0b1 d1kell1 d1rzib1 d1ypzf1 d1wtla\_ d1hkfa\_ d1fail1  
d1figh1 d2vyre\_ d1sjva\_ d1ohqa\_ d1bfoa1 d1pkqb1 d1mjul1 d1b4j11

d1nsn11 d2arjb1 d1p4bh\_ d4aj0a\_ d3nn8b\_ d2rcja1 d1f2xk\_ d4v1dd\_  
d1adqh1 d2eksa\_ d4k3ga\_ d1jfqh1 d1uweh1 d1frgh1 d4gftb\_ dluz8b1  
d4n1ea\_ d1bm3l1 d1clol1 d3mcka1 d2vq1a1 d1ae6h1 d4aq1b1 d1uj3b1  
d1nbqa1 d1fh5l1 d2ck0l1 d2ywza\_ d1q72l1 d4nxbx\_ d1hila1 d4hz1b1  
d2j88l1 d1zmya1 d1cd0a\_ d1a4ka1 d1pskl1 d1a0qh1 d4krmb\_ d1ncbh1  
d2fbjh1 d1j8he1 d1i3ua\_ d1cf8l1 d1fe8h1 d2plya1 d1eeqa\_ d2x89a\_  
d1ol0a\_ d2r0lh1 d1ub5a1 d1dfbh1 d3eyvb1 d4jdvb1 d4p2cg\_ d2gsia1  
d2agj11 d1u3ha1 d2h1ph1 d1rihl1 d1fskc1 d1boga1 d2a77l1 d1ospl1  
d1qfoa\_ d3dwta\_ d2fx7l1 d1rz7l1 d3stba1 d1pkqa1 d1b6da1 d1dzba2  
d1dzba1 d1kj2a\_ d4l1ha\_ d1rzgb1 d1dq1h\_ d12e8l1 d1miel1 d1jmaa\_  
d1sbs11 d1fgnh1 d1f58l1 d1mqkh\_ d1ndgb1 d3qegl1 d1iail1 d2aw2a1  
d1tqbc1 d3fo2a1 d4dkaa\_ d1f8th1 d2g60l1 d2ywya\_ d1uj3a1 d1yc7a\_  
d3bd3a\_ d4w6xb1 d1nmb1\_ d1i8ka\_ d1rjlb1 d1ypze1 d1p7kb1 d1kxqe\_  
d1gpoh1 d2z4qa1 d1w72h1 d1i9rl1 d4qgya1 d4xt1c\_ d2qqnh1 d1cica1  
d3c08h1 d2cd0a\_ d2bdnh1 d1hnga1 d1mam11 d1nldh1 d1cr9h1 d4lcih1  
d3bkyh1 d3qg7l1 d1ai1l1 d1kxvc\_ d4iosd\_ d1l7ih1 d2x1qa\_ d1ub6b1  
d3k74b\_ d1ibgh1 d1teth1 d1igya1 d1hxma1 d2x6ma\_ d2e7la\_ d5e03a\_  
d1qfwm\_ d2r0kh1 d1igjb1 d1rurh1 d1plgh1 d1mj8h1 d1yuhb1 d3fmgl1  
d1rzfl1 d1emt11 d1ad9b1 d1igtb1 d1nlb11 d1d5ih1 d3k7ua\_ d4ffyh\_  
d1bwwa\_ d3dvga1 d1a6ta1 d1fgvl\_ d4qxgl1 d1mim11 d1jh11\_ d2hffb1  
d2hh0l1 d1qkzh1 d1l7tl1 d1afvh1 d1iaii1 d2cjuh\_ d1um5h1 d2ghwb2  
d2ghwb1 d1kgce1 d2fgwh1 d1ikfh1 d1dvfd\_ d2i24n1 d2xtjb\_ d1za3b1  
d2yc1a\_ d2hh0h1 d2x1oa\_ d1bvka\_ d1rjla1 d5e7ba1 d1igta1 d1il1b1  
d2fb4l1 d1mvua\_ d1jpt11 d32c2a1 d1fvca\_ d1iqdb1 d2hrph1 d2p4ab\_  
d4qo1a\_ d1p2cb1 d1wt5c\_ d1t4ka1 d5c1mb\_ d1it9l1 d1bz7a1 d1b2wh1  
d1e4wl1 d1jnl11 d1yedb1 d1za6b1 d3u7aa\_ d1igfh1 d3gnml1 d1orsa1  
d1wejl1 d1a2ya\_ d1hxmb1 d1gafh1 d2j4wh1 d1pz5a1 d1j05a\_ d1a3rh1  
d4fq1l1 d1qfwh\_ d1eo8h1 d1n7mh1 d4s11a\_ d1kegh1 d5da4a\_ d1iqwl1  
d3whxb1 d1vgeh1 d1deeb1 d1c12b1 d1t2ql1 d1ad9a1 d3gsnb1 d3b2uc1  
d1ggbh1 d1t3fb1 d1nak11 d4ocmc\_ d1lila1 d2v7hb3 d2esve1 d1mcoh1  
d2qr0b1 d2q3aa\_ d1ct8a1 d1kcr11 d2pxyb\_ d2uzih\_ d5c3ld\_ d3durb\_  
d1c5c11 d2ak4e1 d1dl7h\_ d1xiwd\_ d1mlba1 d1rmfl1 d1i7zb1 d1dlfl\_  
d2xa3a\_ d5bq7b1 d1dqqb1 d3h42l1 d1legjh1 d1kcv11 d1fe8l1 d2j6el1  
d1f3rb2 d1lk3l1 d1sm3h1 d1q0xh1 d1ghfh1 d7fab11 d1igch1 d1lo0h1  
d4idla\_ d5c2bl\_ d1jrh11 d1il1a1 d3zhda1 d4kfzc\_ d1b0wa\_ d1e6oh1  
d1mex11 d4krpb\_ d1fnsh1 d1ncwh1 d4hgma\_ d4eigb1 d4rzca\_ d2mpa11  
d4y5xa\_ d5en2b1 d3lrga1 d4ej1c1 d1rhha1 d1j05b\_ d1forh1 d1q9wb1  
d2wzpd\_ d2aq2a1 d1h0da1 d3revb1 d2ij0c1 d1tzha1 d4m7j11 d1k6ql1  
d3b9kc1 d1igml\_ d3qeua1 d1dsfl\_ d1celh1 d1kcuh1 d1zvha1 d1zvoa1  
d1tqbb1 d1ay1l1 d2qsc11 d2cgrh1 d1nl0h1 d1ken11 d3eo0a1 d4n9ob1  
d1n0xl1 d3k1kc\_ d2m9wa1 d3dfxa\_ d2aq2b1 d1ck1a1 d1lenfa1 d1i4pa1  
d1v1oa1 d1et9a1 d1esfa1 d2g9hd1 d4ohja1 d1klud1 d1bxta1 d1ty0a1  
d1fnua1 d2cqva1 d1fhga\_ d2k1ma\_ d2dl2a1 d1biha3 d1biha1 d1biha4  
d3qp3a1 d1g1ca\_ d1gxea\_ d1cvsc2 d1cvsc1 d1xmwa2 d1m4ka2 d2otpa2

d1biha2 d1rhfa2 d2fcba2 d2fcba1 d1wwbx\_ d1gsma2 d1lepfa1 d1lepfa2  
d2dava1 d1waaa\_ d1f97a2 d1x44a1 d1vcaa2 d1fnla2 d1fnla1 d3b5ha2  
d3h8na2 d3h8na1 d1jbjja1 d1jbjja2 d1pd6a\_ d1f2qa2 d1f2qa1 d3cx2a\_  
d1nbqa2 d3b5ha1 d1n26a1 d1xiwb\_ d1xaua\_ d1fltx\_ d2ifga1 d1olla1  
d1olla2 d1cs6a4 d1cs6a3 d1cs6a2 d1cs6a1 d2gw5a2 d1sy6a1 d1xiwa\_  
d1lucta2 d1lucta1 d1ry7b2 d1gl4b\_ d1qz1a3 d1olza1 d2c9aa1 d1wwca\_

**Family-64 (c.37.1.19)**

**Positive dataset contains 33 protein sequences.**

d2p6ra3 d2p6ra4 d1wrba1 d1w36b2 d1w36b1 d3bora\_ d1t6na\_ d2eyqa5  
d2eyqa3 d2eyqa2 d2zu6a2 d1w36d1 d2g9na1 d1z3ix2 d2rb4a\_ d1t5ia\_  
d1w36c2 d2j0sa2 d2j0sa1 d3hjha1 d1z5za1 d1z63a1 d1s2ma2 d1s2ma1  
d1wp9a1 d1wp9a2 d3dina4 d3dina3 d1w36c1 d1z3ix1 d1w36d2 d2fwra2  
d2fwra1

**Negative dataset contains 3627 protein sequences.**

d1m32a\_ d1libja\_ d1c7na\_ d1iuga\_ d4q75a\_ d2bkwa1 d1t3ia\_ d1n8pa\_  
d1qz9a\_ d1leg5a\_ d1p3wa\_ d3kgwa\_ d1cl1a\_ d2ctza1 d1vjoa\_ d2rfva\_  
d1gc0a\_ d1cs1a\_ d1d2fa\_ d2ch1a1 d1qgna\_ d1pffa\_ d1elua\_ d1ax4a\_  
d1c7ga\_ d2v1pa1 d2ez1a\_ d1u08a\_ d1lc5a\_ d1b5pa\_ d2ay1a\_ d3pd6a\_  
d7aata\_ d2csta\_ d1j32a\_ d1fg7a\_ d4wlha\_ d1o4sa\_ d1v2da\_ d1gdea\_  
d1m6sa\_ d1v72a1 d1svva\_ d1ajsa\_ d1wsta1 d2f8ja2 d1lk9a\_ d1vp4a1  
d1xi9a1 d2gb3a1 d1yaaa\_ d3i2ka1 d1mpxa2 d2cfba1 d1dfoa\_ d1o69a\_  
d1bj4a\_ d3k28a\_ d2bwpa\_ d3lg0a\_ d2fnua\_ d3ou5a\_ d1z7da1 d1b9ha\_  
d1iaya\_ d4msoa\_ d1bs0a\_ d1s0aa\_ d1sffa\_ d3tqxa\_ d1mdoa\_ d3qboa\_  
d3pgya\_ d1bjna\_ d2dkja\_ d1ejia\_ d1vefa1 d4wxga\_ d3bs8a\_ d3gbxa1  
d1w23a\_ d1f56a\_ d1bypa\_ d1azca\_ d1ws8a\_ d3u25a\_ d1cuoa\_ d1id2a\_  
d1rkra\_ d2iaac\_ d4dp1x\_ d1nwpa\_ d2gima\_ d2i7sa\_ d1qhqa\_ d1gyca3  
d1hfua2 d1kbva1 d1kbva2 d1sdda1 d1sdda2 d1gyca1 d1gyca2 d1mzya1  
d2bw4a1 d1aoza1 d1aoza3 d1aoza2 d1kyaa2 d1kyaa3 d1kyaa1 d1mzya2  
d4e9sa1 d1sddb1 d1sddb2 d1hfua1 d1hfua3 d1oela2 d1oela1 d1v10a2  
d1v10a3 d1v10a1 d1rypd\_ d1irua\_ d1rypc\_ d3unfk\_ d1rypa\_ d1j2pa\_  
d1lirui\_ d1j2qh\_ d3unfh\_ d1m4ya\_ d1rypb\_ d1lirul\_ d1lirug\_ d1liru2\_  
d1q5rh\_ d1rypg\_ d1g3ka\_ d1liruf\_ d1q5qa\_ d1e94a\_ d1lirub\_ d1ryph\_  
d3ty6a\_ d1liruj\_ d1liruk\_ d1rype\_ d1lirud\_ d1lirue\_ d3mi01\_ d1rypf\_  
d1liruh\_ d2z3ba\_ d1liruc\_ d3mka2\_ d1liru1\_ g1or0.1 g1cp9.1 g1e3a.1  
d3sxwa1 d4luka\_ d2bema\_ d1pama1 d1lea9c1 d1qhoa1 d2fhfa2 d2fhfa1  
d1k3ia1 d1j0ha1 d1cxla1 d2bhua1 d1ledqa1 d1flsa2 d1lut9a2 d1gvia1  
d1txka1 d1zx5a1 d2phla2 d2phla1 d1fxza1 d1lrha\_ d1uija1 g1dgw.1  
d2v09a\_ d1uika2 d1uika1 d1dgwa\_ d1lep0a\_ d2pa7a1 d1wlta1 d1nxma\_  
d2c0za1 d1ex0a1 d1g0da1 d4w9ta\_ d1jvna1 d4x2ra1 d1ka9f\_ d1qo2a\_  
d4axka1 d1h5ya\_ d4u28a\_ d2y88a\_ d4wd0a\_ d1vzwa1 d1tafa\_ d1bh9b\_  
d1tafb\_ d1jfib\_ d1q9ca\_ d1h3ob\_ d2byka1 d1n1ja\_ d4g92b\_ d1bh9a\_  
d1jfia\_ d1h3oa\_ d2bykb1 d1h4ba\_ d2opoa\_ d1ydwa2 d2nvwa2 d1zh8a2  
d1qkia2 d1xeea2 d1t1ta2 d4aw8a\_ d3gpdg2 d2q49a2 d1hdgo2 d2g17a2  
d2cvoa2 d2czca1 d3pwka2 d1obfo2 d1i32a2 d1zyao2 d2pkqo2 d1b7go2

d2hjsa2 d1cf2o2 d1vkna2 d1nvmb2 d1lux8a\_ d4i0va\_ d2bkma\_ d1dlwa\_  
d2bmma\_ d2msya\_ d2djoa1 d2r5za\_ d1au7a1 d1f43a\_ d2lmda1 dlakhb\_  
d1s7ea1 d3nara\_ d1zq3p1 d2craa1 d1mija\_ d4uuta\_ d3a01a\_ d1x58a1  
d3rkqa1 d3cmya1 d2cqxa1 d2da6a1 d1e3oc1 d1fjla\_ d1mh3a1 d1ig7a\_  
d1x41a1 d1wh7a1 d1gt0c1 d2mw8a\_ d1lfup\_ d1x2ma1 d1b72a\_ d1wi3a1  
d1jgga\_ d1wjha1 d1x2na1 d1mnmc\_ d2cuea1 d3k2aa\_ d2hosa\_ d2jwta2  
d1pufa\_ d1octc1 d2hi3a\_ d4j19a\_ d3lnqa\_ d1wh5a1 d1b8ib\_ d1fexa\_  
d2cqra1 d1guua\_ d1ug2a1 d2cqqa1 d2ajea1 d4a69c\_ d1h8ac1 d2crga1  
d2iw5b1 d1xc5a1 d2cu7a1 d1wgxa1 d2cjja1 d2ckxa1 d1gvda\_ d1hcra\_  
d1gdtal d1u78a2 d6paxa1 d6paxa2 d1k78a2 d1hlva1 d1hlva2 d1iufa2  
d1iufa1 d1b10a1 d1b10a2 d1d5ya2 d2ovga\_ d1sq8a\_ d1rzsa\_ d3kz3a\_  
d3orca\_ d1kb0a1 d1k8ka2 d1k8ka1 d3uleb1 d3i33a2 d3i33a1 d1bupa1  
d1dkgd2 d1dkgd1 d4ci6a2 d1jcfa1 d4a2ba2 d2fxua1 d1yaga2 d1yaga1  
d4cbua2 d1bupa2 d1g99a1 d2e1za2 d2e1za1 d1saza1 d1saza2 d1iqca1  
d1eb7a2 d1eb7a1 d1nmla2 d1nmla1 d1nira1 d1zc6a1 d1zbsa1 d1zbsa2  
d1zc6a2 d2ch5a2 d2ch5a1 d1zxo2 d1zxo1 d1hroa\_ d4gedb\_ d3zooa\_  
d1mz4a\_ d1gu2a\_ d1f1fa\_ d1dvva\_ d1c6ra\_ d1e29a\_ d1gdva\_ d1cnoa\_  
d1h32b\_ d1co6a\_ d2bh4x\_ d2aiua\_ d5cytr\_ d1jdl\_ d1i8oa\_ d2zboa\_  
d3dmia\_ d1ls9a\_ d1wvec\_ d2yk3a\_ d3ph2b\_ d1dw0a\_ d5aura\_ d1ql3a\_  
d1qn2a\_ d1f1ca\_ d4zzva\_ d2xspa\_ d4v20a\_ d1ojja\_ d4ipma1 d1gpia\_  
d4csia\_ d3pfza\_ d3ovwa\_ d2yoka\_ d2nqya\_ d1h4ga\_ d1hixa\_ d1oa2a\_  
d1olra\_ d3b7ma\_ d4h7ma1 d3wp3a\_ d2vgda\_ d1igoa\_ d3zsea\_ d2nlra\_  
d3wx5a\_ d1oa3a\_ d1pvxa\_ d1m4wa\_ d1f5ja\_ d1oa4a\_ d1ks5a\_ d4ix1a1  
d1h32a1 d1evsa\_ d1cnt1\_ d1pvhb\_ d1z7ca\_ d1huwa\_ d1bgea\_ d1rhga\_  
d1f6fa\_ d1f45b\_ d1i1rb\_ d1axia\_ d1letea\_ d3tgxb\_ d1scfa\_ d2z3qa1  
d3qbl\_ d1hula\_ d1m48a\_ d4nkqb\_ d1leera\_ d1v7mv\_ d5e4ea\_ d2o27a\_  
d3b5ka\_ d2psma1 d4zf7a\_ d3uf5a\_ d4x51a\_ d1d9ca\_ d4ypgc1 d3oq3a\_  
d1lqsl\_ d1n1fa\_ d1aula\_ d1wu3i\_ d3bes1\_ d3ux9a\_ d1v8fa\_ d2ejca\_  
d3muea1 d1lihoa\_ d3q12a1 d3rbaa\_ d2qtra\_ d3l92a\_ d1f9aa\_ d1qjca\_  
d2h29a\_ d1vlha\_ d1od6a\_ d1lw7a1 d1mrza2 d4ruka\_ d2e17a\_ d1iq0a2  
d1lirxa2 d1r6ta2 d1ivsa4 d2cyba\_ d1rqga2 d1j09a2 d2yxna\_ d1f7ua2  
d1h3fa1 d1ffya3 d2g36a1 d1nzja\_ d1n3la\_ d1i6la\_ d1pfva2 d1h3na3  
d3n9ia\_ d3sz3a1 d1cwva5 d3sw2a\_ d1moxc\_ d1dx5i3 d1edmb\_ d1autl2  
d1autl1 d1nqlb\_ d1dval1 d1szba2 d1kigl\_ d2y5fl\_ d1ijqa2 d1gk5a\_  
d1glsa2 d1nt0a3 d1xdtr\_ d1lmja2 d1lmja1 d1nzia2 d2wphe\_ d1klil\_  
d1pfxl2 d1pfxl1 d1p9ja\_ d1glta2 d1f7ea\_ d4yzub\_ d2mgpa1 d1b9wa1  
d1b9wa2 d2mgpa2 d1ob1c1 d1ob1c2 d1n1ia2 d1n1ia1 d2npra2 d2npra1  
d1m1xb4 d1m1xb5 d1qx2a\_ d2y5ia\_ d1qlsa\_ d1psra\_ d3n22a\_ d2egda\_  
d4ggfc\_ d2wcea\_ d2luca\_ d4aqia\_ d3nsia\_ d2lp3a\_ d1j55a\_ d1k8ua\_  
d1nsha\_ d1exra\_ d1tiza1 d1nyaa\_ d1g8ia\_ d1ggwa\_ d1wdcc\_ d3fwba\_  
d1ggza\_ d2o5ga\_ d1ctaa\_ d1m45a\_ d3i5gc\_ d1sl8a\_ d1fpwa\_ d2scpa\_  
d2roaa\_ d4aqra\_ d3pn7b\_ d1br1b\_ d2mysb\_ d1s6ca\_ d1bjfa\_ d2obha\_  
d1jfka\_ d1jf0a\_ d1qv0a\_ d1lkja\_ d2mlfc\_ d2m97a\_ d2d8na\_ d4by5a\_  
d1jbaa\_ d4nqga\_ d1wdcb\_ d2mysc\_ d1j7qa\_ d1s6ia\_ d1uhka2 d1r2ua\_

d1dtla\_ d3kf9a\_ d3pn7c\_ d5d67d\_ d1tuza\_ d1h8ba\_ d1eg3a2 d2zkmx1  
d1snla\_ d1gjya\_ d1y1xa\_ d1hqva\_ d1dvia\_ d1qxp2\_ d4usla\_ d1k94a\_  
d1wkya2 d1uuqa\_ d3wh9a\_ d4m1ra\_ d1xyza\_ d4xuya\_ d2je8a5 d4bf7a1  
d3cuia\_ d1ur4a\_ d1qw9a2 d1odza\_ d2vzsa5 d1bqca\_ d2x2ya1 d1hjqa\_  
d1qnra\_ d4y7ea1 d1vjza\_ d4k68a\_ d2v3ga\_ d4hpga\_ d1nofa2 d1nq6a\_  
d1h4pa\_ d1aq0a\_ d3ziza\_ d4bs0a\_ d1ecea\_ d1h1na\_ d1ta3b\_ d1w91a2  
d1i1wa\_ d1uhva2 d1us3a2 d1egza\_ d7a3ha\_ d1tvna1 d3nyda1 d1ghsa\_  
d2cyga1 d4xv0a\_ d2c8na2 d1w32a\_ d3emca\_ d1v6ya1 d1foba\_ d2uwfa1  
d2fgla\_ d3niya1 d2c0ha1 d1rh9a1 d1yq2a5 d1szna2 d1fa2a\_ d1pama4  
d5do8a1 d1ea9c3 d1hx0a2 d2fhfa5 d1qhoa4 d1avaa2 d1m53a2 d4m8ua1  
d2gjpa2 d1lwha2 d4howa1 d1ktba2 d1j0ha3 d3vm5a1 d2x1ia\_ d1wzaa2  
d1uasa2 d2diea1 d1mxga2 d1ht6a2 d1eswa\_ d5cpsa\_ d1ud2a2 d1zjaa1  
d3gbea1 d1kwga2 d1wdpa\_ d1gcy2\_ d1g5aa2 d1hvxa2 d3dhpa2 d2bhua3  
d4do4a1 d3qgva1 d1e43a2 d1g94a2 d2d3na2 d1gjwa2 d1gvia3 d1x1na1  
d1r7aa2 d1tz7a1 d4c7ga2 d2gjxa1 d1jaka1 d1yhta1 d3wdpp1 d3wq5a\_  
d1gnxa\_ d4gxpa\_ d4hz8a\_ d1e4mm\_ d3aiua\_ d1wcga1 d3ahxa\_ d1v02a\_  
d2dgaa\_ d1pbga\_ d1vffa1 d1qoxa\_ d4ha4a\_ d1mixa2 d1e5wa2 d1j19a2  
d1isna2 d2a16b2 d3syxa1 d1mkea1 d2p8va\_ d1xoda1 d1evha\_ d1qc6a\_  
d1egxa\_ d1lid1a\_ d2hmta\_ d1wgqa1 d1v89a1 d2coda1 d1zc3b\_ d1wg7a1  
d1u5ea1 d1v61a1 d2coca1 d2ys1a1 d1v5pa1 d1ntya2 d1wjma1 d1wi1a1  
d1u29a\_ d1xx0a1 d1unqa\_ d2zkmx3 d1fhoa\_ d1v88a1 d2adza1 d1x1fa1  
d1p6sa\_ d2coaa1 d1btka\_ d1v5ma1 d1faoa\_ d2x18a\_ d1dyna\_ d1x1ga1  
d4kaxb\_ d2j59m1 d1ki1b2 d1xcga2 d1txda2 d1u5da1 d1dbha2 d1w1ha\_  
d1upqa\_ d1v5ua1 d1foea2 d2fjla1 d1eaza\_ d2dfka2 d2cofa1 d1kz7a2  
d9ldta1 d2ewda3 d1up7a1 d2dfda1 d1s6ya1 d1vjta1 d1hyea1 d1t2da1  
d1oj3a3 d1b8pa1 d1ldna1 d1hyha1 d1civa1 d2a92a1 d1ez4a1 d1i0za1  
d1y6ja1 d1gv0a1 d1ur5a1 d1ll1da1 d1obba1 d1v8ba1 d1gdha1 d1l7da1  
d2dlda1 d1mx3a1 d1ygya1 d1qp8a1 d1j4aa1 d2naca1 d1npya1 d3t4ea2  
d1a4ia1 d1o0sa1 d2hk9a2 d2egga2 d1b26a1 d1bvua1 d1gg2a1 d1c1da1  
d1leha1 d1gtma1 d1euzal d1nvtal d3dona2 d1edza1 d1vi2a1 d1p77a1  
d1nyta1 d1b0aa1 d1v16a1 d1v91a1 d1txga2 d3f47a1 d2pv7a2 d1xc2a3  
d2ahra2 d4xiya1 d2f1ka2 d1pgja2 d1i36a2 d1np3a2 d1lj8a4 d1teaa3  
d1qmg2\_ d2i76a2 d2g5ca2 d1wdka3 d1dlja2 d3cuma3 d1kola2 d1f8fa2  
d1qora2 d1jqba2 d1vj0a2 d1cdoa2 d1gu7a2 d1d1ta2 d1xa0a2 d2dm6a2  
d1jvba2 d1llua2 d1h2ba2 d1tt7a2 d1piwa2 d1o89a2 d1iz0a2 d1e3ja2  
d1yb5a2 d1uufa2 d1vj1a2 d1e3ia2 d3gpdg1 d1vc2a1 d2nvwal d1u8fo1  
d1ydwa1 d1hdgo1 d2g17a1 d1cf2o1 d2czca2 d1r0ka2 d1lobfo1 d2cvoa1  
d1ebfa1 d1h6da1 d1i32a1 d1zh8a1 d2q49a1 d1qkia1 d1j5pa4 d3pzra1  
d1xeea1 d1vkoa1 d1vm6a3 d3qvsa1 d2pkqo1 d1b7go1 d1gr0a1 d1p1ja1  
d1lc0a1 d3pwka1 d2hjsa1 d1zyao1 d1vkna1 d1tlta1 d1nvmb1 d3sjua\_  
d3ojfa1 d1xu9a1 d2jjya1 d1n7ha\_ d1y1pa1 d1h5qa\_ d1jtva\_ d4fs3a\_  
d2bkaa1 d1gy8a\_ d2c5aa1 d1ulsa\_ d1ooea\_ d2b69a1 d1y5ma1 d1spxa\_  
d1aela\_ d1bxka\_ d1ydea1 d1gega\_ d1hdoa\_ d1o5ia\_ d1e6ua\_ d1snya1  
d2rhca\_ d3zv4a\_ d5ceja\_ d2d1ya1 d1fjha\_ d3w8ea\_ d2fmua1 d1x1ta\_

d1rpna\_ d3ay7a1 d1k2wa\_ d1eq2a\_ d2hrba1 d3ruaa\_ d2ew8a1 d4hwka\_  
d1xgka\_ d2bd0a1 d1yo6a1 d2a35a1 d2ntva\_ d1vl8a\_ d1hdca\_ d4bkua\_  
d2ag5a1 d2q45a\_ d1nffa\_ d4iy1a\_ d1zbqa1 d1kewa\_ d1lek6a\_ d1ja9a\_  
d2q46a2 d1iy8a\_ d1cyda\_ d2ptga\_ d1hxha\_ d1uzma1 d31yla\_ d4m89a\_  
d3wyea\_ d2b11a1 d1w6ua\_ d1sb8a\_ d2q2va\_ d4nr0a\_ d1e6wa\_ d2gasa\_  
d3oiga1 d2bgka1 d1mxha\_ d1vl0a1 d1rkxa\_ d1r6da\_ d1wmaa1 d1e7wa\_  
d2c07a1 d1xkqa\_ d3tzha\_ d1g0oa\_ d3lz6a\_ d1qyca\_ d1ledoa\_ d1gz6a\_  
d1oc2a\_ d1t2aa\_ d1zema1 d2xoxa\_ d1z45a2 d1geea\_ d1p33a\_ d31t0a\_  
d4e6pa\_ d2wyua\_ d1db3a\_ d4q9na\_ d1xhla\_ d4o1ma\_ d1fmca\_ d2uvda\_  
d2gdza1 d1uaya\_ d2z1ma\_ d2o23a2 d2fr1a2 d2fr1a1 d1qsga\_ d1qyda\_  
d4zjua\_ d2a4ka1 d1yb1a\_ d1wvga1 d1yxma1 d3f4ba\_ d1mg5a\_ d1xg5a1  
d1ex0a4 d1g0da4 d2f4ma1 d1x3za\_ d3u1ra1 d1g9ka2 d1kapp2 d3ioqa\_  
d1fh0a\_ d1o0ea\_ d1khqa\_ d1m6da\_ d2cb5a\_ g8pch.1 d1s4va\_ d2pnsa\_  
d1vsna1 d1mira\_ d1iwda\_ d2oula\_ d7pcka\_ d3bwka\_ d3bcna\_ d2p86a\_  
d1pvja\_ d1pcia\_ d1gece\_ d1deua\_ d4bs6a\_ d1xkga1 d1cqda\_ d1jqpa2  
d2c0ya\_ d2bdza\_ d3p5ua\_ d2o36a\_ d1k9xa\_ d1ex4a2 d1c6va\_ d2jk6a2  
d2jk6a1 d1feca1 d1feca2 d1lpfa1 d1lpfa2 d1xhca1 d1xhca2 d1dx1a2  
d1dx1a1 d1gera2 d1m6ia2 d1onfa1 d1onfa2 d3lada2 d3lada1 d1w4xa1  
d1w4xa2 d1gesa2 d1mo9a1 d1xdia1 d1f12a2 d1f12a1 d1fcda1 d1fcda2  
d1h6va2 d1h6va1 d1mo9a2 d1gv4a2 d1gv4a1 d2gv8a2 d2gv8a1 d1aoga1  
d1aoga2 d1hyua1 d1ebda1 d1ebda2 d3dk9a1 d1qlra2 d1qlra1 d1gesa1  
d1zbf1a1 d2z1ha\_ d2etja1 d3qioa1 d1j11a\_ d2e41a\_ d1j12a\_ d21sna1  
d1io2a\_ d1uaxa\_ d2yv0x\_ d1mu2a1 d1ekea\_ d1i39a\_ d1pn0a1 d1ju2a1  
d2f5va1 d3c96a1 d2gmha1 d1pj5a2 d1gpea1 d1o5wa1 d1n4wa1 d1k0ia1  
d2dw4a2 d2ivda1 d1seza1 d2voua1 d1kdga1 d1s5ja1 d2hbja2 d2igia\_  
d1wlja\_ d1qhta1 d4dlea1 d1tgoa1 d2f96a1 d3tr8a1 d3mxma\_ d1q8ia1  
d1y97a1 d1w0ha\_ d2py5a1 d1noya\_ d1d5aa1 d1yt3a3 d2guia\_ d3mwpal  
d4kb1a\_ d1x14a1 d3vsqa\_ d2gixa1 d1p7ba1 g1apy.1 d31jqqa\_ g1k2x.1  
d1v58a1 d1t3ba1 d4ilfa2 d4npba2 d2av4a1 d3nvva1 d1krha3 d2h88b1  
d1t3qa2 d1kf6b2 d1zoyb1 d1jq4a\_ d1ffva2 d1dgja2 d1rm6c2 d1r7ha\_  
d1faaa\_ d1wika1 d1xfla\_ d1ttza1 d2f51a1 d1ti3a\_ d1nhoa\_ d1sena\_  
d2i4aa\_ d1ep7a\_ d1zmaa1 d3lefa1 d3diea1 d2yana1 d1z6na1 d1oaza\_  
d3zywa1 d4aj8a\_ d1nm3a1 d4fiwa\_ d1wmja\_ d4hs1a1 d1liloa\_ d1xwaa1  
d1wjka1 d2vm1a\_ d1fb6a\_ d1gh2a\_ d1h75a\_ d1nw2a\_ d1kx5b\_ d3a6na\_  
d4m6ba2 d2nqbd\_ d3wkjd\_ d2yfwe\_ d4h9na\_ d5bnxa\_ d1kx5c\_ d3r45a\_  
d1eqzb\_ d4jjnb\_ d1f66c\_ d1eqza\_ d4wnnb\_ d1kx5a\_ d1u35c1 d1id3a\_  
d2nqbc\_ d1kx5d\_ d1ku5a\_ d1b67a\_ d2b5ea2 d2b5ea3 d2b5ea1 d2b5ea4  
d2kp1a1 d2kp2a1 d1hyua3 d1hyua4 d1j08a1 d1j08a2 d1pd212 d2a2ra2  
d1k0dd2 d1f2ea2 d1gsua2 d1f3ba2 d2fhea2 d2pvqa1 d1tw9a2 d1oyja2  
d1e6ba2 d1k0ma2 d3ik7a1 d4is0a1 d1r5aa2 d1jlva2 d1m0ua2 d3gtub2  
d1z9ha2 d1okta2 d1axda2 d2gsra2 d1tu7a2 d1k3ya2 d1zgma1 d1b48a2  
d1gnwa2 d1gwca2 d2gsta2 d1glqa2 d1oe8a2 d1pn9a2 d1v2aa2 d1fw1a2  
d1duga2 d3vrda1 d3vrda2 d1fcde1 d1h1oa2 d1h1oa1 d1m70a2 d1m70a1  
d1g7ea\_ d1a0rp\_ d1ig8a1 d1czan2 d1czan3 d1czan1 d1ig8a2 d1czan4

d1bg3a4 d1bg3a3 d1bg3a2 d1bg3a1 d3h1jd1 d1qqya\_ d1gd6a\_ d1f6ra\_  
d1ivma\_ d2gv0a\_ d1iiza\_ d2z2fa\_ d1j8xa\_ d1ghla\_ d1741a\_ d1691a\_  
d2o4wa\_ d1p37a\_ d1k28a3 d1xjta1 d1jtma\_ d2f2qa\_ d4e97a1 d1g4ma1  
d1g4ma2 d1mpya2 d1kw3b1 d4ghga1 d1tfza1 d3isqa1 d3isqa2 d1sqia1  
d1sqia2 d1lkda2 d1lkda1 d1mpya1 d1cjxa2 d1cjxa1 d1sp9b2 d1t47a1  
d1t47a2 d1f1ua2 d1sp8a1 d1sp8a2 d1f1ua1 d1ro5a1 d1s5ja2 d1qhta2  
d4dlea2 d1tgoa2 d3py8a2 d1q8ia2 d1kfsa2 d2py5a2 d1d5aa2 d1qsta\_  
d2beia1 d4m3sa\_ d1u6ma1 d1ygha\_ d1yk3a1 d3dr6a\_ d1xmta\_ d1z4ea1  
d2ge3a1 d1bo4a\_ d2fiaa1 d2jdca1 d1y9wa1 d3to7a\_ d1wwza1 d2fl4a1  
d2ozua1 d2b5ga\_ d2cy2a1 d2p0wa\_ d1cm0a\_ d4pswa\_ d1yrea1 d1yr0a1  
d1m4ia\_ d2gana1 d1yvka1 d1ghea\_ d2g3aa1 d1y7ra1 d2eulia1 d1q2ya\_  
d2fsra1 d1xeba\_ d2ae6a1 d1qsma\_ d2aj6a1 d1y9ka1 d1i12a\_ d1vkca\_  
d2atra1 d1n71a\_ d2d4pa1 d2fiwa1 d2fe7a1 d1tiqa1 d2ou2a\_ d1yx0a1  
d2fcka1 d1p0ha\_ d2j8ma\_ d2pq8a\_ d1z4ra1 d1s3za1 d1ufha\_ d2hgya1  
d2hgya2 d1lrza2 d1ne9a1 d1ne9a2 d1f37b\_ d1xvqa1 d1pn0a2 d3hy2a\_  
d2cvba1 d1o8xa\_ d1lu4a\_ d1we0a1 d2bmxa1 d2a4va1 d1psqa\_ d1xiya1  
d1q98a\_ d1n8ja\_ d1zofa1 d2ggta\_ d3tjja\_ d4je1a1 d3s9fa\_ d2zcta\_  
d1qmva\_ d1jfua\_ d2b1ka\_ d5dvba1 d2b5xa1 d2v2ga\_ d1st9a\_ d3tb2a\_  
d41lra\_ d4fh8a1 d1e2ya\_ d1knga\_ d2h30a\_ d1i5ga\_ d2z9sa\_ d2f8aa1  
d1tp9a1 d2b7ka\_ d1nm3a2 d3hvva\_ d2wfca1 d4kcea\_ d1xvwa1 d4gqca1  
d3qpma\_ d4k1fa\_ d1zzoa1 d1gp1a\_ d1prxa\_ d4od7a1 d1z6ma1 d4mcua1  
d4dvca1 d3l9sa\_ d1un2a\_ d3rppa\_ d1e88a1 d1l6ja5 d1l6ja4 d1leaka4  
d1leaka3 d1l6ja3 d1h8pa1 d1jgta2 d1ofda3 d1ea0a3 d1ecfa2 d1q15a2  
d1ao0a2 d1te5a\_ d1ys1x\_ d4hs9a\_ d1ispa\_ d1ex9a\_ d1ku0a\_ d3qmma\_  
d1lgya\_ d4l3wa\_ d1l1fa\_ d1gz7a\_ d1lukca\_ d4wfia\_ d4cg1a1 d3visa\_  
d1svpa\_ d1mbma\_ d3su6a1 d1cu1a1 d4agka\_ d1vcpa\_ d1q31a\_ g1n11.1  
d3e90b\_ d3u1jb\_ d3zxha\_ d1cg1a\_ d1rm8a\_ d1leaka2 d1hy7a\_ d2jsda\_  
d1cxva\_ d1hv5a\_ d1i76a\_ d3p0ya1 d1lgra1 d1lgra2 d1n8yc2 d1m6ba2  
d1m6ba1 d1m41a\_ d2bk7a\_ d3fjua\_ d1z5ra1 d1kwma1 d1uwya2 d1jqga1  
d2c1ca1 d1dtda\_ d1h81a2 d1h6ta2 d1h6ua2 d2tbvc\_ d1c8nc\_ d1x36a\_  
d1smvc\_ d1ng0c\_ d4sbvc\_ d1lopa\_ d1f2nc\_ d1cixa\_ d1y29a\_ d1v7fa\_  
d2jtba\_ d1d1ha\_ d1g9pa\_ d1lupa\_ d1qk7a\_ d1mb6a\_ d2a2va\_ d1niya\_  
d1i25a\_ d1hvwa\_ d2mpqa\_ d1ie6a\_ d1kqha\_ d1la4a\_ d2mxoa1 d1d10a\_  
d1koza\_ d1qk6a\_ d1emxa\_ d1lqra\_ d1c6wa\_ d1js9c\_ d1f15b\_ d1za7a\_  
d1laja\_ g1f8v.1 d1novc\_ d2bbvc\_ d1ny721 d1ny722 d1a6ca3 d1a6ca2  
d1a6ca1 d1pgl21 d1pgl11 d1ny711 d1mqta\_ d1d4m3\_ d1fmd3\_ d2mev1\_  
g1aym.1 d1ev13\_ d4q4w1\_ d1r1a3\_ d2x5ia\_ d1rhi1\_ g1r1a.1 g1d4m.1  
g1rhi.1 d1b35b\_ d1loopa\_ d1tme1\_ d4iv1a\_ g1pvc.1 g1fpn.1 d1fpn1\_  
d4gb31\_ d1d4m1\_ d1fmd1\_ d2wzr3\_ g1cov.1 d1qqp3\_ g1fmd.1 d2x5ic\_  
d1rhi3\_ g1oop.1 d1hxs1\_ g1hxs.1 d1fpn3\_ d1bev1\_ g2mev.1 d1eah3\_  
d1aym1\_ d1pvc3\_ d1qqp1\_ d1zba3\_ d1h8ta\_ d3vbhc\_ g1b35.1 g1bev.1  
d1hxs3\_ g1ev1.1 d1bev3\_ g1tmf.1 d1tmf1\_ d1b35a\_ d2mev3\_ g1eah.1  
g1h8t.1 d1eah1\_ d4q4w3\_ d1r1a1\_ d1aym3\_ d1pvc1\_ d1zba1\_ d1h8tc\_  
d1loopc\_ d1tme3\_ g1qqp.1 d4iv1c\_ g1tme.1 d1y14b1 d2nn6i1 d1i941\_



d2zjra2 d1smxa\_ d2qamc2 d1hh2p1 d2r7da1 d1rl2a2 d1wfga1 d3bzka4  
d1x6oa2 d3a0ja\_ d2j01d2 d2ja9a1 d4ql5a\_ d1hr0w\_ d1luza\_ d2n3sa\_  
d2vnud1 d1h95a\_ d1go3e1 d2nn6h1 d2mo1a\_ d1iz6a2 d1jjga\_ d1e3pa2  
d2ix0a3 d2ix0a2 d2lxja\_ d1ueba3 d1ueba2 d2z0sa1 d1u0la1 d2ix0a1  
d2eifa2 d2je6i1 d3i2za1 d2c35b1 d2ahob2 d1t9ha1 d3i4oa\_ d2qall1  
d1jt8a\_ d2nn6g1 d1g6pa\_ d3cama\_ d1i94q\_ d1c9oa\_ d1d7qa\_ d2ba0a1  
d2vnud2 d2vnud3 d1khia2 d2qalq1 d1wi5a1 d1xtda2 d1ny4a\_ d2flia1  
d1rpxa\_ d1tqja\_ d1tqxa\_ d4lt9a1 d3tc7a1 d3hoja\_ d1i4na\_ d3vnda\_  
d3n18a1 d1geqa\_ d3naval d1v5xa\_ d4a2ra1 d3tc6a1 d1ujpa\_ d4ijba\_  
d1xcfa\_ d1vc4a\_ d1rd5a\_ d3b5va\_ d2r80b\_ d1cqa1 d1cg5a\_ d1gcvb\_  
d3boma\_ d2h8fb\_ d2raoa\_ d3bj1a\_ d4hrrb\_ d2r50a\_ d3d1kb\_ d2aalb1  
d3zhwa\_ d3hf4b\_ d3gdja\_ d1jebb\_ d3bj1b\_ d1x9fb\_ d1wmub\_ d1gcva\_  
d3bcqb\_ d3d4xb\_ d2dc3a\_ d3hf4a\_ d4yu3a\_ d3k8ba\_ d1qpwb\_ d2r80a\_  
d3bcqa\_ d1v4wa\_ d3wtgb\_ d1jl7a\_ d4esaa\_ d1a9we\_ d3d1ab\_ d1fsla\_  
d4h2la\_ d1v4wb\_ d1mwca\_ d1vhba\_ d1jeba\_ d1spgb\_ d1h97a\_ d1q1fa\_  
d1tu9a1 d3d1aa\_ d1hdsb\_ d3hyub\_ d2zffb\_ d3fs4a\_ d1oj6a\_ d1shrb\_  
d4h2lb\_ d4yu3b\_ d1spga\_ d3hrwa\_ d3qqra\_ d3at5a\_ d4wchd\_ d3hyua\_  
d1cg5b\_ d1uc3a\_ d1hbra\_ d2raob\_ d1outb\_ d4esab\_ d3gdjb\_ d3qqqa\_  
d1x9fc\_ d3vrfa\_ d1litha\_ d3mkba\_ d3d4xa\_ d3mjpa\_ d1jl6a\_ d3fh9a\_  
d1outa\_ d2dc3b\_ d1it2a\_ d3eoka\_ d3g46a\_ d1qpwa\_ d3vrfb\_ d1ch4a\_  
d1x9fd\_ d1hdsa\_ d2zfb\_ d3mkbb\_ d1or4a\_ d3wtga\_ d1a4fa\_ d3fh9b\_  
d3bomb\_ d3cy5a\_ d3at5b\_ d1x9fa\_ d2oifa\_ d4lmb\_ d1cpcb\_ d3v57a\_  
d1kn1a\_ d1cpca\_ d4f0ta\_ d2vjha\_ d4po5b\_ d1eyxa\_ d1alla\_ d4f0tb\_  
d1b33b\_ d1b8db\_ d4h0mb\_ d1b33a\_ d2vjhb\_ d4lm6b\_ d2vmlb\_ d1allb\_  
d2vjta\_ d3dbja\_ d2vmla\_ d2vjtb\_ d4f0ub\_ d1f99b\_ d4rmpa1 d1lliaa\_  
d1eyxb\_ d2uulb\_ d4lmsb\_ d4f0ua\_ d2bv8a\_ d1f99a\_ d2bv8b\_ d2c71b\_  
d3dbjb\_ d4rmpb1 d1b8da\_ d4h0ma\_ d3v57b\_ d1kn1b\_ d2uula\_ d2j96a\_  
d1pfsa\_ d2a1ka\_ g1gxs.1 d1sfra\_ d1f0na\_ d4qeka\_ d1jmx3 d1pbya3  
d1pbya4 d4iuua3 d4bvva\_ d5hpga\_ d3k65a\_ d1ki0a3 d1ki0a2 d1ki0a1  
d1a0ha1 d1pmla\_ d3sp8a3 d2feba1 d1gvfa\_ d3qm3a1 d2fjka\_ d1f74a\_  
d3l21a\_ d2e1da\_ d1to3a1 d1w3ia\_ d1sfla\_ d1n7ka\_ d1vcva1 d4imea\_  
d1wa3a\_ d2ocza1 d1f2ja\_ d3m16a\_ d2yxga\_ d1ub3a\_ d3a5fa\_ d1fbaa\_  
d1l6wa\_ d1xfba1 d1wx0a1 d1vpxa1 d1ojxa\_ d1mxsa\_ d2a4aa1 d1xkya1  
d3cq0a1 d3s1xa\_ d1f05a\_ d1fdja\_ d3cpra1 d4d2ja\_ d1cg2a1 d1yloa2  
d1y7ea2 d1y0ya3 d1l1fwa1 d1vixa1 d1fnoa4 d1vhua2 d1ysja1 d1vhea2  
d1z21a1 d2fvga2 d1vgya1 d1r3na1 d2grea2 d1xmba1 g1q71.1 d1rtqa\_  
d3rp2a\_ g1lucy.1 d1fuja\_ d2zchp\_ d3w94a\_ d1si5h\_ d1lo6a\_ g2pka.1  
d1cgha\_ d1kigh\_ d1a5ia\_ d3s9ba\_ d1hj8a\_ d1ao5a\_ d2anya\_ d1q3xa1  
d1gvza\_ d1azza\_ d4gsoa\_ d2f91a1 d1iaua\_ d1gdna\_ d1eufa\_ g1fiw.1  
d1eq9a\_ d4nfea\_ d2rdla\_ d1spja\_ d1elva1 d1a7sa\_ d1ekbb\_ d1pfxc\_  
d1yc0a\_ d2aiqa\_ g1fiz.1 d1fi8a\_ d4k60a\_ d4dgja\_ d1mzaa\_ d1lop0a\_  
d3tjva\_ d1pytd\_ d1sgfg\_ g1gg6.1 d2eeka\_ g1rtf.1 d1a0ja\_ d3g01a\_  
d1pytc\_ d4e7na\_ d1ddja\_ d1z8ga1 d2hlca\_ d1npma\_ d1brup\_ g1jou.1  
d1sgfa\_ d1autc\_ g2hnt.1 g1kdq.1 d3s69a\_ d4crga\_ d1fxya\_ d1lbqya\_

d2ftba\_ d1pmpa\_ d2rcqa1 d1fdqa\_ d4lkpa\_ d1sa8a\_ d1vyfa\_ d1lpja\_  
d3vg7a1 d4azqa1 d1o8va\_ d5bvqa\_ d1p6pa\_ d2qo4a\_ d1opba\_ d1yiva1  
d1o1va\_ d4bvma1 d4tkba\_ d4i3ba\_ d1bwya\_ d1ftpa\_ d1ggla\_ d4gkca\_  
d1cbia\_ d3p6da1 d1kqwa\_ d2a0aa1 d1dzka\_ d4tlja\_ d2a2ua\_ d4wfva\_  
d3tlda\_ d4iixa\_ d3zq3a\_ d2nnda\_ d1i4ua\_ d1kxo\_ d1bbpa\_ d1kt7a\_  
d1lexsa\_ d3s26a1 d1lf7a\_ d1qfta\_ d4gh7a\_ d1z24a1 d1qabe\_ d1xkia\_  
d1ew3a\_ d3bx7a\_ d4iawa1 d1n0sa\_ d1gkab\_ d3kzaa\_ d2k23a\_ d2l9ca1  
d2joza1 d1gm6a\_ d3kffa\_ d3saoa1 d1e5pa\_ d1yupa1 d1iiua\_ d3lgia\_  
d3i77a\_ d2z9ia2 d4nsva\_ d1lcya2 d4jcna\_ d1agja\_ d1os8a\_ d1hpga\_  
d1p3ca\_ d1l1ja\_ d1qtfa\_ d2i49a\_ d1nnfa\_ d1xvxa\_ d1lursa\_ d1h3da1  
d1iuda\_ d4m1va1 d1twya\_ d3e13x\_ d2nxoa1 d4pfua\_ d3ttma\_ d1elja\_  
d2qmwa1 d1us5a\_ d1y3na1 d1jeta\_ d1uqwa\_ d4f19a1 d2esna2 d3thia\_  
d3fasa1 d2uyeb\_ d2xwva1 d1r9la\_ d2fyia1 d1pb7a\_ d2ozza1 d1sw5a\_  
d1nh8a1 d1vr5a1 d2g29a\_ d1xs5a\_ d3lswa\_ d2z23a\_ d3w9va\_ d3tcha\_  
d1q35a\_ d1z7me1 d3q27a\_ d1p99a\_ d1ve4a1 d2i6ea1 d4mcoa1 d4n8ya\_  
d1zbma1 d1hsla\_ d1ixca2 d1j1na\_ d1xvya\_ d1y9ua\_ d2z22a1 d1xoca1  
d4oera\_ d1wdna\_ d5f1qa1 d1xt8a1 d1i6aa\_ d4gwoa\_ d4igta1 d1pc3a\_  
d4mmpa1 d1o63a\_ d2czla1 d2onsa2 d4mija1 d1eh3a\_ d3skpa\_ d1dtza2  
d1ieja\_ d1jnfa2 d1ce2a1 d1jnfa1 d1b1xa2 d1b1xa1 d1jw1a1 d1jw1a2  
d1ryoa\_ d1h76a1 d1h76a2 d1etha2 d1w52x1 d2ppla1 d1hpla2 d1lpbb2  
d2oxea1 d1bu8a2 d1rpl2a\_ d3q3ma\_ d1za0a1 d1mxra\_ d2inca\_ d1jk0a\_  
d2incb\_ d1mhyb\_ d3hf1b\_ d1r2fa\_ d2uw1a\_ d1mhyd\_ d3n37a\_ d1afra\_  
d1oquc\_ d1syya\_ d1mtyd\_ d2o1za\_ d1uzra\_ d1smsa\_ d2fkza\_ d1zuj1  
d1s3qa1 d2fjca1 d1z6om1 d1veia\_ d4dyya\_ d1jiga\_ d3gvya\_ d2pyba\_  
d4cy9a1 d3bvfa1 d1r03a\_ d2cf7a\_ d1nf4a\_ d1zs3a1 d4iwka\_ d3ka8a\_  
d3np0x\_ d1n1qa\_ d1lb3a\_ d4e6ka\_ d1z6oa1 d2fzfa1 d4dyua\_ d3ge4a\_  
d1jgca\_ d4am4a\_ d2z6ma\_ d1ji5a\_ d1vlga\_ d1lkoa1 d1krqa\_ d3qz3a\_  
d1o9ra\_ d2ffxj\_ d1euma\_ d1yv1a1 d2v2pa\_ d1j30a\_ d4di0a\_ d1dpsa\_  
d1oewa\_ d2qzxa\_ d2asia\_ d1psoe\_ d1miqa\_ d1smra\_ d2h6ta\_ d1pfza\_  
d1lizda\_ d3hd8a\_ d1j71a\_ d1dpja\_ d4aa9a\_ d1t6ex\_ g1b5f.1 g1lya.1  
g1htr.1 d1qdma2 d1bxoa\_ d1wkra\_ d1tzsa\_ d1libqa\_ d2qzwa\_ d1orva2  
d1xfda2 d1bdqa\_ d3ggta\_ d3ixoa\_ d1mrxa\_ d2haha\_ d1tw7a\_ d4njsa\_  
d1sgua\_ d2p3da\_ d1nsoa\_ d3d3ta\_ d2rkfa\_ d1c6ya\_ d2rspa\_ d3ogpa\_  
d3ekwa\_ d2o4na\_ d2j9ja\_ d1baia\_ d3ggua\_ d3lzua\_ d4npua\_ d4j55a\_  
d2r8na\_ d2fxda\_ d2p3ca\_ d4dqa\_ d3ttpa\_ d3t3ca\_ d2p3aa\_ d2hc0a\_  
d2fdda\_ d3mwsa\_ d1c1la\_ d4lbqa\_ d1a78a\_ d1slta\_ d4no4a\_ d3zsja\_  
d3duia\_ d1g86a\_ d1is3a\_ d1hlca\_ d1h4ra3 d4yl8a1 d2a16a3 d1l7ya\_  
d1wgda1 d1wga1 d4q5eb\_ d1wjna1 d1se9a\_ d3n3kb\_ d1wz0a1 d1we6a1  
d2m0xa\_ d2gbka\_ d3rt3b1 d1wh3a1 d1sifa\_ d2ekek2 d4ii2b1 d4hk2a1  
d1c3ta\_ d1m94a\_ d1wgha1 d1ttna1 d1j8ca\_ d1wx8a1 d3v6cb1 d2ma9b\_  
d4i6lb1 d1bt0a\_ d2jvca1 d1iyfa\_ d2k1fa\_ d1wxva1 d1wf9a1 d1t0ya\_  
d2io0b2 d1x1ma1 d2gbma\_ d1zw7a1 d2m17a\_ d1we7a1 d2lwpa\_ d2gbja\_  
d1wjua1 d1v6ea1 d1v86a1 d4eewa\_ d1wiaa1 d4icva\_ d4gu2a\_ d1wx7a1  
d1wy8a1 d4hjka1 d2faza1 d1v5oa1 d3ruib\_ d1eo6a\_ d3waob\_ d2r2qa1

d3m95a\_ d3wana\_ d2a13a1 d2cr5a1 d1wj4a1 d1s3sg\_ d3ubra\_ d1qo8a1  
d1d4ca1 d2k3va\_ d1ft5a\_ d1qdba\_ d1m1qa\_ d2j7aa\_ d1h21a\_ d1ogyb\_  
d4fasa\_ d1jnia\_ d1sp3a\_ d1ps9a2 d1lqta1 d1cjca1 d3h33a\_ d1rwja\_  
d19hca\_ d1os6a\_ d3bxua\_ d3h4na\_ d1i77a\_ d3caoa\_ d1j0pa\_ d1duwa\_  
d1ofwa\_ d2e84a\_ d1hh5a\_ d1gyoa\_ d3h34a\_ d2bcgg1 d2bcgg2 d1d5ta1  
d1wioa4 d1ccza2 d1dr9a2 d1ic1a1 d2d9qb1 d2nxyb2 d1adqa1 d1fnga1  
d1uvqb1 d1zs8a1 d2vola1 d2vola2 d1mfb12 d2jelh2 d1uwel2 d3qq4b1  
d1kjbv\_ d1k5na1 d1osph2 d4odhl2 d1low0a1 d1low0a2 d1bfob2 d3l9ra2  
d3jtth1 d2fath2 d4elkb2 d1fn4b2 d2xfxb\_ d1pg7x2 d1cqka\_ d4k71b2  
d11k2a1 d1eapb2 d41fhg2 d1i4fa1 d2nw2a2 d1kfah2 d1mhca1 d1h3ua1  
d1wejh2 d1h0db2 d1a5fh2 d1kcvh2 d1mjuh2 d1qqda1 d1kcrh2 d1k8ia1  
d3huja2 d2nnab1 d1nfd2 d3mffb2 d1s9va1 d11k3h2 d1q0xl2 d1fv1b1  
d1neza1 d4rfeb2 d1r3ha1 d1a6tb2 d1kjva1 d1pz5b2 d1onqa1 d2bc4a2  
d1de4a1 d1k8da1 d1tcra2 d1dn0b2 d1nfd2 d2xwtb2 d1bfoa2 d1mexh2  
d1iakb1 d1ypzf2 d4f7ea2 d1q72l2 d2fbjh2 d1fe8h2 d1clzh2 d1fngb1  
d1uvqa1 d1vgka1 d1c16a1 d4j12a2 d4x99b2 d1igtb3 d1je6a1 d1q72h2  
d1nldh2 d1teth2 d2hmic2 d1ilca2 d1ilca1 d1k8ib1 d1q0yh2 d1kfa12  
d3frua1 d1pg7w2 d1u58a1 d1igyb4 d1igyb3 d1hyrc1 d1klub1 d1deeb2  
d1c12b2 d2bc4b2 d2ig2h2 d1kcv12 d3wn5b1 d11k2b\_ d11k3l2 d1mjul2  
d1sm3h2 d1q0xh2 d1zvsal d1ydpal d1u8ib2 d1ypze2 d1kcuh2 d2e3fa\_  
d2e3ea\_ d2l1da\_ d2ny8x\_ d2e3ga\_ d2ny9x\_ d2nz3a\_ d2l1j7a\_ d1n4na\_  
d2m8bb1 d2kyqa\_ d3psma\_ d1jxca\_ d2g11a\_ d1ugla\_ d4uj0a\_ d2k4ua\_  
d1hp2a\_ d2lu9a\_ d1baha\_ d2meoa1 d1wm7a\_ d1hlya\_ d1n8ma\_ d1jlza\_  
d1wpda\_ d1c55a\_ d1pvza\_ d1wt7a\_ d1rjia\_ d1wz5a\_ d1m2sa\_ d1pjva\_  
d1c49a\_ d1qkya\_ d2ktca1 d1wmta\_ d1du9a\_ d1j5ja\_ d1r1ga\_ d1t0za\_  
d2i61a\_ d1t1ta\_ d1sn4a\_ d1kv0a\_ d2lkba\_ d1npia\_ d1wwna\_ d1pe4a\_  
d2kbka\_ d2li7a\_ d2kbha\_ d1dq7a\_ d1sega\_ d1omya\_ d1zywa1 d1jzaa\_  
d2jcqa\_ d1n9wa1 d1bbua1 d1e1oa1 d1c0aa1 d1l0wa1 d3a74a1 d1eova1  
d1bvsa3 d1ixra2 d1iyjb4 d1iyjb5 d1iyjb3 d1o7ia\_ d4ipca1 d1x3ea\_  
d4apva\_ d1jb7a1 d1jb7a2 d1jb7a3 d3kdfa\_ d1ue1b\_ d1wjja1 d3eiva\_  
d1xjva2 d1xjva1 d2ccza2 d1se8a\_ d1l1loc\_ d1jb7b\_ d1qvca\_ d1qzga\_  
d1mia4 d1mia5 d1mia3 d3ubub\_ d1legia\_ d1qo3c\_ d1v7pa\_ d1tdqb\_  
d3ubua\_ d1c3ab\_ d1h8ua\_ d3bx4b\_ d1t8ca1 d1sb2a1 d1qdda\_ d2ziba1  
d3cada\_ d1byfa\_ d1j34b\_ d1jwia\_ d1jzna\_ d1c3aa\_ d1wmza\_ d3bdwb\_  
d1hq8a\_ d1fifa1 d1dv8a\_ d3hupa\_ d1wk1a1 d1umra\_ d2afpa\_ d3bx4a\_  
d1gz2a\_ d1s16a\_ d1v7pb\_ d3g8ka\_ d1ixxa\_ d1j34a\_ d1jwib\_ d1g1sa1  
d1y17a1 d1ja3a\_ d1fvub\_ d3bdwa\_ d1sb2b1 d1fvua\_ d1umrc\_ d1oz7a\_  
d4m17a\_ d3cfwa1 d1ypqa1 d1g1ta1 d3fd4a\_ d3l9jc\_ d4dn8a1 d1v4lb\_  
d1rd11\_ d2msba\_ d1xwdc1 d3kj4a\_ d1w8aa\_ d2ifga3 d1p9ag\_ d1xkua\_  
d1ohea2 d2f4da\_ d1rxda\_ d2hxpa\_ d1xria\_ d1d5ra2 d1fpza\_ d3ezza\_  
d4y2ea\_ d1i9sa\_ d3azy\_ d3wvja\_ d1upsa1 d1ajoa\_ d2hyka\_ d1ajka\_  
d2vy0a\_ d1o4ya\_ d3o5sa\_ d3d6ea\_ d3atga\_ d1dypa\_ d1umza\_ d3i4ia\_  
g1qmo.1 g1len.1 d3zyra\_ d1fnya\_ d1n47a\_ g2ltn.1 d1avba\_ d3usua\_  
d1dhkb\_ d1f9ka\_ d1ukga\_ d1g8wa\_ d1g9fa\_ d1wbfa\_ d3wcsa\_ d1g7ya\_

g1loe.1 d1mvqa\_ d1hq1a\_ d1dbna\_ d1qnwa\_ d1fx5a\_ d4l8qa\_ d1ioaa\_  
d3n35a\_ d1epwa1 d2h0ba\_ d2erfa\_ d1h30a2 d1h30a1 d3mw4a1 d1pz7a\_  
d2r1ba\_ d3v64a1 d1d2sa\_ d3bopa1 d3mw3a1 d1okqa1 d1okqa2 d1dszb\_  
d1a6ya\_ d3cbba\_ d1ynwa1 d1r4ia\_ d1hcqa\_ d2hana\_ d2hanb\_ d2enva1  
d1kb4b\_ d2n11b\_ d1l01a\_ d1cita\_ d2dara2 d2dara1 d1wyha2 d2dloa2  
d1rutx4 d1rutx3 d2cuqa2 d1x41a2 d1x41a1 d1x3ha2 d1x3ha1 d2d8za1  
d1x61a2 d1x6aa1 d1x6aa2 d2cora2 d2cora1 d1v6ga1 d1v6ga2 d2d8za2  
d1x64a1 d1x64a2 d2co8a1 d1x63a2 d2dj7a2 d2dj7a1 d2cu8a2 d2cu8a1  
d1g47a2 d1g47a1 d1j2oa1 d1wyha1 d2dloa1 d1wiga1 d1wiga2 d2cupa2  
d2cupa3 d1x68a1 d2d8ya2 d2d8ya1 d1m3va2 d1x62a1 d1x68a2 d1x61a1  
d1b8ta3 d1b8ta2 d2d8xa2 d2d8xa1 d1x4ka1 d1x4ka2 d2cuqa1 d1m3va1  
d2co8a2 d1j2oa2 d1x63a1 d2cura1 d2cura2 d1x62a2 d1op9a\_ d1y01a1  
d1letzb1 d1egj11 d2gsib1 d1nj9a1 d4jfh1 d1aqk11 d1t2ja\_ d1lo4h1  
d1zvya1 d3v4v11 d4enec1 d1kxtb\_ d5e8ea1 d2pxya\_ d4weud\_ d1xiwc\_  
d2esvd1 d1qnzh\_ d1ogae1 d1f4xh1 d4n1hb\_ d3ezjb1 d3mlw11 d1kfah1  
d1letza1 d1b4jh1 d3cfic\_ d4w68a\_ d2arja1 d1ek3a\_ d2ok011 d1vera\_  
d1uwgh1 d1blnb1 d1fpth1 d1rzga1 d2giya1 d4m3kb1 d1nc2a1 d2nyyd1  
d1ncna\_ d1fbih1 d5dxwa\_ d4fqqa1 d1dqdh1 d1jfq11 d1kelh1 d1faih1  
d1frgl1 d1figl1 d4m6n11 d1fo0a\_ d4hxb11 d3b5ga\_ d3quyd1 d2h9gb1  
d1i8kb\_ d2dd8h1 d2ck0h1 d1eaja\_ d4w6wb1 d2a6ib3 d1t66d1 d2e27h\_  
d1ob1b1 d1f11b1 d2v7na1 d1ad0a1 d2xt1b1 d1pskh1 d4i13b1 d2op411  
d1a0ql1 d1uwell d1za3a1 d1ncb11 d4uu9a\_ d1bm3h1 d1cloh1 d1nqba2  
d1cf8h1 d4y5va\_ d1mhph1 d5anma1 d4cdgc1 d4ldeb\_ d1y01b1 d2pcpb1  
d1z3gl1 d1dfb11 d1fh5h1 d3g5xa1 d1tzib1 d4dn311 d3zhka1 d2b1hh1  
d2uyla1 d1f3dh1 d1nj9b1 d2agjh1 d2h1p11 d1q72h1 d8fabb1 d1ndmb1  
d1rjca1 d4u6hb1 d3upca\_ d2fbj11 d1osph1 d1tvda\_ d2cjev\_ d4fhbd1  
d1bd2d1 d1rz7h1 d3nn8a\_ d1blna1 d1knoa1 d1nfda1 d2bmkb1 d1dq11\_  
d1igyb1 d1igfl1 d12e8h1 d3utza1 d1nc2b1 d1rihh1 d4mwfb1 d4jvpa1  
d1mieh1 d1rhfa1 d1fgn11 d1sbsh1 d1lp9e1 d1dn0a1 d4lqf11 d1iaih1  
d1kgcd1 d1mh5b1 d1gp011 d2g60h3 d1f8t11 d2jixd1 d4grwh\_ d1fo0b\_  
d1bfob1 d1axsa1 d1u9ka\_ d1nmbh\_ d1h8na1 d1h8na2 d1jguh1 d4eura1  
d3sdy11 d35c8h1 d1w7211 d1mvub\_ d1i9rh1 d1ob1a1 d4wenb\_ d1yeeh1  
d3ietc1 d1f58h1 d1ad0b1 d1mqk1\_ d1nbvh1 d4b50a\_ d3r8bb\_ d1baf11  
d1mamh1 d4rgne1 d2gsgb\_ d35c811 d1bafh1 d1ailh1 d2pcpa1 d2fath1  
d2x1pa\_ d1orsb1 d1ibgl1 d1shma\_ d1a2yb\_ d1u0qa\_ d2coqa\_ d1hilb1  
d1qfwi\_ d1jv5b\_ d1fn4b1 d5e0qa\_ d1nsnh1 d1plgl1 d4ocx11 d1kb5h1  
d1rzfh1 d1pg7x1 d2fx7h1 d2oi9c\_ d1l7i11 d3eyva1 d1d5i11 d4ffyl\_  
d1tet11 d1a6wh\_ d1ac6a\_ d3dvfa\_ d1nfde1 d1mimh1 d1ri8a1 d1jhlh\_  
d3dura\_ d1fskb1 d1f97a1 d3so3b1 d2ak4d1 d1lp9f1 d4z7wf1 d1l7th1  
d4y5ya\_ d4x7ec1 d1emth1 d1likf11 d1nlbh1 d4uta11 d1bjma1 d1eapb1  
d1u6ah1 d2dtgd1 d1kj2b\_ d1xeda1 d1cleh1 d1fgvh\_ d2bnub1 d2fb4h1  
d2dtgb1 d1ktrh\_ d1jpth1 d1qkz11 d4hepg\_ d2atpb1 d1flrh1 d2hrp11  
d1mvfa\_ d1iaim1 d3k80a1 d2jb5h1 d3zkxc\_ d4grwe\_ d1it9h1 d1rhhb1  
d3w9ec\_ d1e4wh1 d1sy6h1 d2j6eh1 d3qxta\_ d1jglh1 d1p7ka1 d1tzhb1

d4n8pa1 d1gaf11 d2jelh1 d1wioa2 d4i0cc1 d1cicb1 d1lmka2 d1lmka1  
d1liqwh1 d1lorqb1 d1lejoh1 d1jnlh1 d4zgl1a\_ d43c9b\_ d1ggbl1 d1wejh1  
d3q6fa1 d1f3dj1 d3c6la1 d1bqlh1 d3p9wb\_ d1a3r11 d1h0db1 d2uzil\_  
d1eo8l1 d1qfwl\_ d1n7ml1 d1ligja1 d1c5ch1 d2a9mh\_ d1rmfh1 d1fj1b1  
d4heme\_ d1ccza1 d1a5fh1 d1ogad1 d1dlfh\_ d1qa9b\_ d1vgel1 d3qskb\_  
d1sjxa\_ d4ozfg1 d1sq2n\_ d1qd0a\_ d1kcvh1 d1c5db1 d3qcul1 d8faba1  
d3bn9d1 d1mjuh1 d4y8dc\_ d7fabh1 d3dvgb1 d1lo0l1 d1a6tb1 d1gigh1  
d1kcrh1 d2hwz11 d1yjdc1 d3clfl1 d4krna\_ d1dl7l\_ d1e6ol1 d1mexh1  
d3r0ma\_ d4kkna\_ d1fnsl1 d1loaqh\_ d1rzia1 d1ucbh1 d1ncw11 d4b41a\_  
d1nfdfl d2mpah1 d2d7tl1 d4grwf\_ d4b5ea\_ d1lk3h1 d3u79a\_ d4u3xa\_  
d1ghfl1 d1bvkb\_ d1mcww1 d1b88a\_ d1jrhh1 d32c2b1 d4wemb\_ d1dsfh\_  
d1op3h1 d1cell1 d1iqda1 d1qoka1 d1qoka2 d1qfuh1 d2crya1 d1ay1h1  
d1loaq1\_ d3ab0b\_ d1rur11 d1t4kb1 d1bz7b1 d1n0xh1 d1for11 d1ucbl1  
d4w6yb\_ d43c9a\_ d2aabl1 d1tzia1 d4n1ca\_ d1k6qh1 d3g9ab\_ d4tvsa1  
d1igmh\_ d1pz5b1 d3dx9a1 d3wxwh\_ d1nakh1 d1kcul1 d3eaka\_ d4qlra1  
d1cr9l1 d1d9ka\_ d1f4x11 d1deea1 d2i27n2 d1c12a1 d2orb11 d1j8hd1  
d1mcp11 d1c5da1 d1kenh1 d1bd2e1 d1h5ba\_ d4x7fc1 d3upaa\_ d1t3fa1  
d1indh1 d2dtgc1 d4hc111 d1zv5a1 d4wgvb\_ d1uwgl1 d4f37k1 d1laqkh1  
d1vesa\_ d3zkqd\_ d1fpt11 d1lo4l1 d1knob1 d3rrqa\_ d4orz\_ d1mlbb1  
d4hgkc1 d1dqdl1 d1bogb1 d4ozhe1 d1dr9a1 d1i7za1 d1dn0b1 d1kell1  
d1rzib1 d1ypzf1 d1wtla\_ d1hkfa\_ d1fail1 d1figh1 d2vyre\_ d1sjva\_  
d1ohqa\_ d1bfoa1 d1pkqb1 d1mjul1 d1b4j11 d1nsl1 d2arjb1 d1p4bh\_  
d4aj0a\_ d3nn8b\_ d2rcja1 d1f2xk\_ d4v1dd\_ d1adqh1 d2eksa\_ d4k3ga\_  
d1jfqh1 d1uweh1 d1frgh1 d4gftb\_ d1uz8b1 d4n1ea\_ d1bm311 d1clol1  
d3mcka1 d2vq1a1 d1ae6h1 d4aq1b1 d1uj3b1 d1nbqa1 d1fh5l1 d2ck0l1  
d2ywza\_ d1q72l1 d4nbxb\_ d1hila1 d4hz1b1 d2j88l1 d1zmya1 d1cd0a\_  
d1a4ka1 d1psk11 d1a0qh1 d4krmb\_ d1ncbh1 d2fbjh1 d1j8he1 d1i3ua\_  
d1cf8l1 d1fe8h1 d2p1ya1 d1leeqa\_ d2x89a\_ d1ol0a\_ d2r0lh1 d1ub5a1  
d1dfbh1 d3eyvb1 d4jdvb1 d4p2cg\_ d2gsia1 d2agj11 d1u3ha1 d2h1ph1  
d1rih11 d1fskc1 d1boga1 d2a77l1 d1osp11 d1qfoa\_ d3dwta\_ d2fx7l1  
d1rz7l1 d3stba1 d1pkqa1 d1b6da1 d1dzba2 d1dzba1 d1kj2a\_ d4l1ha\_  
d1rzgb1 d1dq1h\_ d12e8l1 d1miel1 d1jmaa\_ d1sbs11 d1fgnh1 d1f58l1  
d1mqkh\_ d1ndgb1 d3qeg11 d1iail1 d2aw2a1 d1tqbc1 d3fo2a1 d4dkaa\_  
d1f8th1 d2g60l1 d2ywya\_ d1uj3a1 d1yc7a\_ d3bd3a\_ d4w6xb1 d1nmb1\_  
d1i8ka\_ d1rjlb1 d1ypze1 d1p7kb1 d1kxqe\_ d1gpoh1 d2z4qa1 d1w72h1  
d1i9r11 d4qgya1 d4xt1c\_ d2qqnh1 d1cica1 d3c08h1 d2cd0a\_ d2bdnh1  
d1hnga1 d1mam11 d1nldh1 d1cr9h1 d4lcih1 d3bkyh1 d3qg7l1 d1ai111  
d1kxvc\_ d4iosd\_ d1l7ih1 d2x1qa\_ d1ub6b1 d3k74b\_ d1libgh1 d1teth1  
d1igya1 d1hxma1 d2x6ma\_ d2e71a\_ d5e03a\_ d1qfwm\_ d2r0kh1 d1igjb1  
d1rurh1 d1plgh1 d1mj8h1 d1yuhb1 d3fmg11 d1rzfl1 d1emtl1 d1ad9b1  
d1lightb1 d1nlbl1 d1d5ih1 d3k7ua\_ d4ffyh\_ d1bwwa\_ d3dvga1 d1a6ta1  
d1fgvl\_ d4qxgl1 d1mim11 d1jh11\_ d2hffb1 d2hh0l1 d1qkzh1 d1l7tl1  
d1afvh1 d1iaii1 d2cjuh\_ d1um5h1 d2ghwb2 d2ghwb1 d1kgce1 d2fgwh1  
d1likfh1 d1dvfd\_ d2i24n1 d2xtjb\_ d1za3b1 d2yc1a\_ d2hh0h1 d2x1oa\_

d1bvka\_ d1rjla1 d5e7ba1 d1igta1 d1l11b1 d2fb4l1 d1mvua\_ d1jptl1  
d32c2a1 d1fvca\_ d1liqdb1 d2hrph1 d2p4ab\_ d4qola\_ d1p2cb1 d1wt5c\_  
d1t4ka1 d5c1mb\_ d1it9l1 d1bz7a1 d1b2wh1 d1e4wl1 d1jnl11 d1yedb1  
d1za6b1 d3u7aa\_ d1igfh1 d3gnml1 d1orsa1 d1wejl1 d1a2ya\_ d1hxmb1  
d1gafh1 d2j4wh1 d1pz5a1 d1j05a\_ d1a3rh1 d4fq1l1 d1qfwh\_ d1eo8h1  
d1n7mh1 d4s11a\_ d1kegh1 d5da4a\_ d1iqwl1 d3whxb1 d1vgeh1 d1deeb1  
d1c12b1 d1t2ql1 d1ad9a1 d3gsnb1 d3b2uc1 d1ggbh1 d1t3fb1 d1nakl1  
d4ocmc\_ d1lila1 d2v7hb3 d2esve1 d1mcoh1 d2qr0b1 d2q3aa\_ d1ct8a1  
d1kcr11 d2pxyb\_ d2uzih\_ d5c3ld\_ d3durb\_ d1c5c11 d2ak4e1 d1d17h\_  
d1xiwd\_ d1mlba1 d1rmfl1 d1i7zb1 d1dlf1\_ d2xa3a\_ d5bq7b1 d1dqqb1  
d3h42l1 d1egjh1 d1kcv11 d1fe8l1 d2j6e11 d1f3rb2 d1lk3l1 d1sm3h1  
d1q0xh1 d1ghfh1 d7fabl1 d1igch1 d1lo0h1 d4idla\_ d5c2b1\_ d1jrh11  
d1l11a1 d3zhda1 d4kfzc\_ d1b0wa\_ d1e6oh1 d1mexl1 d4krpb\_ d1fnsh1  
d1ncwh1 d4hgma\_ d4eigb1 d4rzca\_ d2mpal1 d4y5xa\_ d5en2b1 d3lrga1  
d4ej1c1 d1rhha1 d1j05b\_ d1forh1 d1q9wb1 d2wzpd\_ d2aq2a1 d1h0da1  
d3revb1 d2ij0c1 d1tzha1 d4m7j11 d1k6ql1 d3b9kc1 d1igml\_ d3qeua1  
d1dsfl\_ d1celh1 d1kcuh1 d1zvha1 d1zvoa1 d1tqbb1 d1ay1l1 d2qsc11  
d2cgrh1 d1nl0h1 d1ken11 d3eo0a1 d4n9ob1 d1n0xl1 d3k1kc\_ d2aq2b1  
d1ck1a1 d1enfa1 d1i4pa1 d1vloa1 d1et9a1 d1esfa1 d2g9hd1 d4ohja1  
d1bxta1 d1eu3a1 d1ty0a1 d1fnua1 d2cqva1 d1fhga\_ d2k1ma\_ d2d12a1  
d1biha3 d1biha1 d1biha4 d3qp3a1 d1glca\_ d1gxea\_ d1cvsc2 d1cvsc1  
d1xmwa2 d1m4ka2 d2otpa2 d1biha2 d1rhfa2 d2fcba2 d2fcba1 d1wwbx\_  
d1gsma2 d1lepfa1 d1lepfa2 d2dava1 d1waaa\_ d1f97a2 d1x44a1 d1vcaa2  
d1fnla2 d1fnla1 d3b5ha2 d3h8na2 d3h8na1 d1jbja1 d1jbja2 d1pd6a\_  
d1f2qa2 d1f2qa1 d3cx2a\_ d1nbqa2 d3b5ha1 d1n26a1 d1xiwb\_ d1xaua\_  
d1fltx\_ d2ifga1 d1olla1 d1olla2 d1cs6a4 d1cs6a3 d1cs6a2 d1cs6a1  
d2gw5a2 d1sy6a1 d1xiwa\_ d1lucta2 d1lucta1 d1ry7b2 d1gl4b\_ d1qz1a3  
d1olza1 d2c9aa1 d1wwca\_

**Family-65 (c.37.1.20)**

**Positive dataset contains 15 protein sequences.**

d1sxjc2 d2p65a\_ d3hu3a3 d1sxjd2 d1sxja2 d1tuea1 d2ce7a2 d1w5sa2  
d1sxjb2 d2gnoa2 d2a5yb3 d1u0ja1 d2fnaa2 d4gita\_ d1sxje2

**Negative dataset contains 3730 protein sequences.**

d1m32a\_ d1libja\_ d1c7na\_ d4q75a\_ d2bkwa1 d1t3ia\_ d1n8pa\_ d1qz9a\_  
d1jf9a\_ d1eg5a\_ d1p3wa\_ d3kgwa\_ d1cl1a\_ d2ctza1 d1vjoa\_ d2rfva\_  
d1gc0a\_ d1cs1a\_ d1d2fa\_ d2ch1a1 d1qgna\_ d1pffa\_ d1elua\_ d1u08a\_  
d1lc5a\_ d1b5pa\_ d2ay1a\_ d1bw0a\_ d3pd6a\_ d7aata\_ d2csta\_ d1j32a\_  
d1fg7a\_ d4wlha\_ d1o4sa\_ d1v2da\_ d1gdea\_ d1m6sa\_ d1v72a1 d1svva\_  
d1ajsa\_ d1wsta1 d2f8ja2 d1lk9a\_ d1vp4a1 d1xi9a1 d2gb3a1 d3i2ka1  
d1lnsa3 d1mpxa2 d2cfba1 d1dfoa\_ d1o69a\_ d1bj4a\_ d3k28a\_ d2bwpa\_  
d3lg0a\_ d2fnua\_ d3ou5a\_ d1z7da1 d1b9ha\_ d1iaya\_ d4msoa\_ d1bs0a\_  
d1s0aa\_ d1sffa\_ d3tqxa\_ d1mdoa\_ d3qboa\_ d3pgya\_ d2dkja\_ d1ejia\_  
d1vefa1 d4wxga\_ d3bs8a\_ d3gbxa1 d1w23a\_ d1sefa\_ d1sfna\_ d1sq4a\_  
d3lgia\_ d3i77a\_ d2z9ia2 d4nsva\_ d1lcya2 d4jcna\_ d1agja\_ d1os8a\_

d1hpga\_ d1l1ja\_ d1qtfa\_ d1ddla\_ d1lauyb\_ d1f56a\_ d1bypa\_ d1lazca\_  
d1ws8a\_ d3u25a\_ d1cuoa\_ d1lid2a\_ d1lrkra\_ d2iaac\_ d4dp1x\_ d1nwp\_a\_  
d2gima\_ d2i7sa\_ d1qhqa\_ d3ehbb1 d1fftb1 d1hfua2 d1kbva1 d1kbva2  
d1sdda1 d1sdda2 d1gyca1 d1gyca2 d1mzya1 d2bw4a1 d1aoza1 d1aoza3  
d1aoza2 d1kyaa2 d1kyaa3 d1kyaa1 d1mzya2 d4e9sa1 d1sddb1 d1sddb2  
d1hfua1 d1hfua3 d1oe1a2 d1oe1a1 d1v10a2 d1v10a3 d1v10a1 g1f8v.1  
d1novc\_ d2bbvc\_ d1xkta1 d2hfka\_ d5d3ka\_ g1or0.1 g1cp9.1 g1e3a.1  
d1a3qa1 d1iknc\_ d3brda1 d1p7h11 d1loy3c\_ d1gjia1 d1zk9a1 d2cxka1  
d2h0va\_ d4alac\_ d1pjwa\_ d1rera1 d1s6na\_ d3uzqb\_ d2phla2 d2phla1  
d1fxza1 d1lrha\_ d1uija1 g1dgw.1 d2v09a\_ d1uika2 d1uika1 d1dgwa\_  
d1ep0a\_ d2pa7a1 d1wlta1 d2c0za1 d1ds6b\_ d1fstb\_ d1ex0a1 d1g0da1  
d1ju8a\_ d4mh8a\_ d1mu2a2 d4i7ga1 d1tafa\_ d1bh9b\_ d1tafb\_ d1jfib\_  
d1q9ca\_ d1h3ob\_ d2byka1 d1n1ja\_ d4g92b\_ d1bh9a\_ d1jfia\_ d1h3oa\_  
d2bykb1 d2bjca1 d2hsga1 d1qpza1 d1ydw2 d2nvwa2 d1h6da2 d1zh8a2  
d1qkia2 d1xeaa2 d1t1ta2 d1mqta\_ d1d4m3\_ d1fmd3\_ d2mev1\_ g1aym.1  
d1ev13\_ d4q4w1\_ d1r1a3\_ d2x5ia\_ d1rhi1\_ g1r1a.1 g1d4m.1 g1rhi.1  
d1b35b\_ d1lopa\_ d1tme1\_ d4iv1a\_ g1pvc.1 g1fpn.1 d1fpn1\_ d4gb31\_  
d1d4m1\_ d1fmd1\_ d1ev11\_ d2wzr3\_ g1cov.1 d1qqp3\_ g1fmd.1 d2x5ic\_  
d1rhi3\_ g1oop.1 d1hxs1\_ g1hxs.1 d1fpn3\_ d1bev1\_ g2mev.1 d1eah3\_  
d1aym1\_ d1pvc3\_ d1qqp1\_ d1zba3\_ d1h8ta\_ d3vbhc\_ g1b35.1 g1bev.1  
d1hxs3\_ g1ev1.1 d1bev3\_ g1tmf.1 d1tmf1\_ d2mev3\_ g1eah.1 g1h8t.1  
d1eah1\_ d4q4w3\_ d1r1a1\_ d1aym3\_ d1pvc1\_ d1zba1\_ d1h8tc\_ d1oopc\_  
d1tme3\_ g1qqp.1 d4iv1c\_ g1tme.1 d1r0ka3 d1j5pa3 d1vkoa2 d1vm6a2  
d3qvsa2 d1gr0a2 d1p1ja2 d2ovga\_ d1sq8a\_ d1rzsa\_ d3kz3a\_ d3orca\_  
d3gpdg2 d2q49a2 d1hdgo2 d2g17a2 d2cvoa2 d2czca1 d3pwka2 d1obfo2  
d1i32a2 d1zyao2 d2pkqo2 d1b7go2 d2hjsa2 d1cf2o2 d1vkna2 d1nvmb2  
d1ux8a\_ d1dlya\_ d4i0va\_ d2bkma\_ d1dlwa\_ d2bmma\_ d2msya\_ d2djoa1  
d2r5za\_ d1au7a1 d1f43a\_ d2lmda1 d1akhb\_ d1s7ea1 d3nara\_ d1zq3p1  
d2craa1 d1mija\_ d4uuta\_ d3a01a\_ d1x58a1 d3rkqa1 d3cmya1 d2cqxa1  
d2da6a1 d1e3oc1 d1fjla\_ d1mh3a1 d1ig7a\_ d1x41a1 d1wh7a1 d1gt0c1  
d2mw8a\_ d1lfup\_ d1x2ma1 d1b72a\_ d1wi3a1 d1wjha1 d1x2na1 d1mnmc\_  
d2cuea1 d3k2aa\_ d2hosa\_ d2jwta2 d1pufa\_ d1oetc1 d2hi3a\_ d1b8ia\_  
d4j19a\_ d3lnqa\_ d1wh5a1 d1b8ib\_ d1fexa\_ d2cqra1 d1guua\_ d1ug2a1  
d2cqqa1 d2ajea1 d4a69c\_ d1h8ac1 d2crga1 d2iw5b1 d1xc5a1 d1ofcx1  
d2cu7a1 d1wgxa1 d2cjja1 d2ckxa1 d1gvda\_ d1tc3c\_ d1gdta1 d1u78a2  
d1kv9a1 d1k8ka2 d1k8ka1 d3uleb1 d3i33a2 d3i33a1 d1bupa1 d1dkgd2  
d1dkgd1 d4ci6a2 d1jcfa1 d4a2ba2 d2fxua1 d1yaga2 d1yaga1 d4cbua2  
d1bupa2 d3vrda1 d3vrda2 d1fcdc2 d1fcdc1 d1h1oa2 d1h1oa1 d1m70a1  
d1liqca2 d1liqca1 d1eb7a2 d1eb7a1 d1nmla1 d1nira1 d1qksa1 d1js9c\_  
d1f15b\_ d1za7a\_ d2nqya\_ d1h4ga\_ d1hixa\_ d1oa2a\_ d1olra\_ d3b7ma\_  
d4h7ma1 d3wp3a\_ d2vgda\_ d1ligoa\_ d3zsea\_ d2nlra\_ d3wx5a\_ d1oa3a\_  
d1pvxa\_ d1m4wa\_ d1f5ja\_ d1oa4a\_ d1ks5a\_ d4ixla1 d2ah2a1 d1evsa\_  
d1cnt1\_ d1pvhb\_ d1z7ca\_ d1huwa\_ d1bgea\_ d1rhga\_ d1f6fa\_ d1f45b\_  
d1ilrb\_ d1axia\_ d1letea\_ d3tgxb\_ d1scfa\_ d2z3qa1 d3qbla\_ d1hula\_

d1m48a\_ d4nkqb\_ d1v7mv\_ d5e4ea\_ d2o27a\_ d3b5ka\_ d2psma1 d4zf7a\_  
d3uf5a\_ d4x51a\_ d1d9ca\_ d4yppc1 d3oq3a\_ d1lqsl\_ d1n1fa\_ d1aula\_  
d1wu3i\_ d3bes1\_ d3ux9a\_ d2ejca\_ d3muea1 d1ihoa\_ d3q12a1 d4dnxa2  
d1v47a2 d1g8fa2 d1jhda2 d1x6va2 d3rbaa\_ d2qtra\_ d1nupa\_ d3l92a\_  
d1f9aa\_ d1qjca\_ d2h29a\_ d1vlha\_ d1od6a\_ d1lw7a1 d1mrza2 d4ruka\_  
d2e17a\_ d1liq0a2 d1irxa2 d1r6ta2 d1livsa4 d2cyba\_ d1rqga2 d1j09a2  
d2yxna\_ d1f7ua2 d1h3fa1 d1ffya3 d2g36a1 d1nzja\_ d1jila\_ d1n3la\_  
d1i6la\_ d1pfva2 d1h3na3 d3n9ia\_ d3sz3a1 d3sw2a\_ d1moxc\_ d1dx5i3  
d1edmb\_ d1autl2 d1autl1 d1nqlb\_ d1dval1 d1szba2 d1kigl\_ d2y5fl\_  
d1ijqa2 d1gk5a\_ d1g1sa2 d1nt0a3 d1xdtr\_ d1lmja2 d1lmja1 d1nzia2  
d2wphe\_ d1klil\_ d1pfxl2 d1pfxl1 d1p9ja\_ d1g1ta2 d1f7ea\_ d4yzub\_  
d2mgpa1 d1b9wa2 d2mgpa2 d1oblcl d1oblcl2 d1n1ia2 d1n1ia1 d2npra2  
d2npra1 d2y5ia\_ d1qlsa\_ d1psra\_ d3n22a\_ d2egda\_ d4ggfc\_ d2wcea\_  
d2luca\_ d4aqia\_ d3nsia\_ d2lp3a\_ d1j55a\_ d1a4pa\_ d1k8ua\_ d1nsha\_  
d1pvaa\_ d3fs7a\_ d2pvba\_ d1ttxa\_ d1rwya\_ d2kyfa\_ d1rk9a\_ d1a75a\_  
d1lexra\_ d1tiza1 d1nyaa\_ d1g8ia\_ d1ggwa\_ d1wdcc\_ d3fwba\_ d1ggza\_  
d2o5ga\_ d1ctaa\_ d1m45a\_ d3i5gc\_ d1sl8a\_ d1fpwa\_ d2scpa\_ d2roaa\_  
d4aqra\_ d3pn7b\_ d1br1b\_ d2mysb\_ d1s6ca\_ d1bjfa\_ d2obha\_ d1jfka\_  
d1jf0a\_ d1qv0a\_ d1lkja\_ d2mlfc\_ d2m97a\_ d2d8na\_ d4by5a\_ d1jbaa\_  
d4nqga\_ d1wdcb\_ d2mysc\_ d1j7qa\_ d1s6ia\_ d1uhka2 d1r2ua\_ d1dtla\_  
d3kf9a\_ d3pn7c\_ d1y1xa\_ d1hqva\_ d1dvia\_ d1df0a1 d1qxp2 d4usla\_  
d1k94a\_ d1wkya2 d1uuqa\_ d3wh9a\_ d4mlra\_ d1xyza\_ d4xuya\_ d2je8a5  
d4bf7a1 d3cuia\_ d1ur4a\_ d1qw9a2 d1odza\_ d2vzsa5 d1bqca\_ d2x2ya1  
d1hjqa\_ d1qnra\_ d4y7ea1 d1vjza\_ d4k68a\_ d2v3ga\_ d4hpga\_ d1nofa2  
d1nq6a\_ d1h4pa\_ d1aq0a\_ d3ziza\_ d4bs0a\_ d1ecea\_ d1h1na\_ d1ta3b\_  
d1w91a2 d1ilwa\_ d1uhva2 d1us3a2 d1legza\_ d7a3ha\_ d1tvna1 d3nyda1  
d1ghsa\_ d2cyga1 d4xv0a\_ d2c8na2 d1w32a\_ d3emca\_ d1v6ya1 d1foba\_  
d2uwfa1 d2fgla\_ d3niya1 d2c0ha1 d1rh9a1 d1yq2a5 d1szna2 d1fa2a\_  
d1pama4 d5do8a1 d1ea9c3 d2fhfa5 d1qhoa4 d1avaa2 d1m53a2 d4m8ua1  
d2gjpa2 d1lwha2 d4howa1 d1ktba2 d1j0ha3 d3vm5a1 d2x1ia\_ d1wzaa2  
d1uasa2 d2diea1 d1mxga2 d1ht6a2 d1eswa\_ d1iv8a2 d5cpsa\_ d1ud2a2  
d1zjaa1 d3gbea1 d1kwga2 d1wdpa\_ d1gcya2 d1g5aa2 d1hvxa2 d3dhpa2  
d2bhua3 d4do4a1 d3qgva1 d1e43a2 d1g94a2 d2d3na2 d1gjwa2 d1gvia3  
d1x1na1 d1r7aa2 d1tz7a1 d4c7ga2 d2gjxa1 d1jaka1 d1yhta1 d4toqa\_  
d1wb0a1 d1w9pa1 d1eoka\_ d1itxa1 d1kfwal d1goia2 d2gsja\_ d1hjxa1  
d1jnda1 d1vf8a1 d3wdpp1 d3wq5a\_ d1gnxa\_ d4gxp2 d4hz8a\_ d1e4mm\_  
d3aiua\_ d1wcga1 d1qvba\_ d3ahxa\_ d1v02a\_ d2dgaa\_ d1pbga\_ d1vffa1  
d1qoxa\_ d4ha4a\_ d1mixa2 d1e5wa2 d1j19a2 d1isna2 d2a16b2 d3syxa1  
d1mkea1 d2p8va\_ d1xoda1 d1i7aa\_ d1evha\_ d1legxa\_ d2y8ga\_ d1xkea1  
d1k5db\_ d2y8fa\_ d2v76a\_ d1wj1a1 d1aqca\_ d1qqga1 d1ntva\_ d1n3ha\_  
d4dbba\_ d3f0wa1 d1p3ra\_ d1wgua1 d2cy4a1 d3hqca\_ d1wvha1 d1xr0b1  
d1wgqa1 d1v89a1 d2coda1 d1zc3b\_ d1wg7a1 d1u5ea1 d1v61a1 d2coca1  
d2ys1a1 d1v5pa1 d1nty2 d1wjma1 d1wila1 d1u29a\_ d1xx0a1 d1unqa\_  
d2zkmx3 d1fhoa\_ d1v88a1 d2adza1 d1x1fa1 d1p6sa\_ d2coaa1 d1btka\_



d1v5ma1 d1faoa\_ d2x18a\_ d1dyna\_ d1x1ga1 d4kaxb\_ d2j59m1 d1ki1b2  
d1xcga2 d1txda2 d1u5da1 d1dbha2 d1wlha\_ d1upqa\_ d1v5ua1 d1foea2  
d2fjla1 d1eaza\_ d2dfka2 d2cofa1 d1kz7a2 d9ldta1 d2ewda3 d1up7a1  
d2dfda1 d1s6ya1 d1vjta1 d7mdha1 d1hyea1 d1t2da1 d1ojsa3 d1b8pa1  
d1ldna1 d1hyha1 d1civa1 d2a92a1 d1ez4a1 d1y6ja1 d1gv0a1 d1ur5a1  
d1llda1 d1obba1 d1v8ba1 d1gdha1 d2dl1a1 d1mx3a1 d1ygya1 d1qp8a1  
d1li4a1 d1j4aa1 d2naca1 d1npya1 d3t4ea2 d1a4ia1 d1o0sa1 d2hk9a2  
d2egga2 d1b26a1 d1bvua1 d1c1da1 d1leha1 d1gtma1 d1euza1 d1nvtal  
d3dona2 d1edza1 d1gpja2 d1vi2a1 d1p77a1 d1nyta1 d1b0aa1 d1vl6a1  
d1v9la1 d1txga2 d3f47a1 d2pv7a2 d1xc2a3 d2ahra2 d4xiya1 d2f1ka2  
d1pgja2 d1i36a2 d1np3a2 d1lj8a4 d1teaa3 d1qmga2 d2i76a2 d2g5ca2  
d1wdka3 d1dlja2 d3cuma3 d1kola2 d1f8fa2 d1qora2 d1jqba2 d1vj0a2  
d1cdoa2 d1gu7a2 d1xa0a2 d2dm6a2 d1jvba2 d1rjwa2 d1llua2 d1h2ba2  
d1tt7a2 d1piwa2 d1o89a2 d1liz0a2 d1e3ja2 d1yb5a2 d1uufa2 d1vj1a2  
d1e3ia2 d3gpdg1 d1vc2a1 d2nvwa1 d1u8fo1 d1ydwa1 d1hdgo1 d2g17a1  
d1cf2o1 d2czca2 d1r0ka2 d1obfo1 d2cvoa1 d1ebfa1 d1h6da1 d1i32a1  
d1zh8a1 d2q49a1 d1qkia1 d1j5pa4 d3pzra1 d1xeea1 d1vkoa1 d1vm6a3  
d3qvsa1 d2pkqo1 d1b7go1 d1gr0a1 d1p1ja1 d1lc0a1 d1j0xo1 d3pwka1  
d2hjsa1 d1zyao1 d1vkna1 d1tlta1 d1nvmbl d3sjua\_ d3ojfa1 d1xu9a1  
d2jjya1 d1n7ha\_ d1y1pa1 d1h5qa\_ d1jtva\_ d4fs3a\_ d2bkaa1 d1gy8a\_  
d2c5aa1 d1ulsa\_ d1ooea\_ d2b69a1 d1y5ma1 d1spxa\_ d1aela\_ d1bxka\_  
d1ydea1 d1gega\_ d1hdoa\_ d1o5ia\_ d1e6ua\_ d1snya1 d2rhca\_ d3zv4a\_  
d5ceja\_ d2d1ya1 d1fjha\_ d3w8ea\_ d2fmua1 d1x1ta\_ d1rpna\_ d3ay7a1  
d1k2wa\_ d1eq2a\_ d2hrba1 d3ruaa\_ d2ew8a1 d4hwka\_ d1xgka\_ d2bd0a1  
d1yo6a1 d2a35a1 d2ntva\_ d1vl8a\_ d1hdca\_ d4bkua\_ d2ag5a1 d2q45a\_  
d1nffa\_ d4iy1a\_ d1zbqa1 d1kewa\_ d1ek6a\_ d1ja9a\_ d2q46a2 d1iy8a\_  
d1cyda\_ d2ptga\_ d1hxha\_ d1uzma1 d3lyla\_ d4m89a\_ d3wyea\_ d2b1la1  
d1w6ua\_ d1sb8a\_ d2q2va\_ d4nr0a\_ d1e6wa\_ d2gasa\_ d3oiga1 d2bgka1  
d1mxha\_ d1vl0a1 d1rkxa\_ d1r6da\_ d1wmaa1 d1e7wa\_ d2c07a1 d1xkqa\_  
d3tzha\_ d1g0oa\_ d3lz6a\_ d1qyca\_ d1ledoa\_ d1gz6a\_ d1oc2a\_ d1t2aa\_  
d1zema1 d2xoxa\_ d1z45a2 d1geea\_ d1p33a\_ d3lt0a\_ d4e6pa\_ d2wyua\_  
d1db3a\_ d4q9na\_ d1xhla\_ d4o1ma\_ d1fmca\_ d2uvda\_ d2gdza1 d1uaya\_  
d2z1ma\_ d2o23a2 d2fr1a2 d2fr1a1 d1qsga\_ d1qyda\_ d4zjua\_ d2a4ka1  
d1yb1a\_ d1wvga1 d1yxma1 d3f4ba\_ d1mg5a\_ d1xg5a1 d2gfoa1 d1vjva\_  
d2ayna1 d3nhea\_ d4ekfa\_ d2ckga\_ d1th0a\_ d2bkra\_ d1ex0a4 d1g0da4  
d2f4ma1 d1x3za\_ d1mdwa\_ d1qxp4 d1ziva1 d1zcma1 d1t3ca\_ d2a97a\_  
d3f1ea\_ g1elh.1 d3ioqa\_ d1fh0a\_ d1o0ea\_ d1khqa\_ d1m6da\_ d2cb5a\_  
d1cs8a\_ g8pch.1 d1s4va\_ d2pnsa\_ d1vsna1 d1mira\_ d1iwda\_ d2oula\_  
d7pcka\_ d3bwka\_ d3bcna\_ d2p86a\_ d1pvja\_ d1pcia\_ d1gece\_ d1deua\_  
d4bs6a\_ d1xkga1 d1cqda\_ d1jqpa2 d2c0ya\_ d2bdza\_ d3p5ua\_ d1zoya1  
d1qo8a2 d1d4ca2 d1chua2 d1jnra2 d1kf6a2 d2jk6a2 d2jk6a1 d1feca1  
d1feca2 d1lpfa1 d1lpfa2 d1xhca1 d1xhca2 d1dxla2 d1dxla1 d1gera2  
d1m6ia2 d1onfa1 d1onfa2 d3lada2 d3lada1 d1w4xa1 d1w4xa2 d1gesa2  
d1mo9a1 d1xdia1 d1fl2a1 d1fcda1 d1fcda2 d1h6va2 d1h6va1 d1mo9a2

d1gv4a2 d1gv4a1 d2gv8a2 d2gv8a1 d1aoga1 d1aoga2 d1hyua1 d1ebda1  
d1ebda2 d3dk9a1 d1q1ra2 d1q1ra1 d1gesa1 d1pv8a\_ d1w5qa\_ d2c1ha\_  
d1ohla\_ d1l6sa\_ d1zbfal d2z1ha\_ d2etja1 d3qioa1 d1j11a\_ d2e4la\_  
d1j12a\_ d2l1sna1 d1lio2a\_ d1uaxa\_ d2yv0x\_ d1mu2a1 d1ekea\_ d1i39a\_  
d1ps9a2 d1o94a2 d1lqta1 d1pn0a1 d1reoal d1ju2a1 d2f5va1 d3c96a1  
d2gmha1 d1pj5a2 d1gpeal d1n4wa1 d1k0ia1 d2dw4a2 d2ivda1 d1seza1  
d2voua1 d1kdga1 d1s5ja1 d2hbja2 d2igia\_ d1wlja\_ d1qhta1 d4dlea1  
d1tgoa1 d2f96a1 d3tr8a1 d3mxma\_ d1q8ia1 d1y97a1 d1w0ha\_ d1kfsa1  
d2py5a1 d1noya\_ d1d5aa1 d1yt3a3 d2guia\_ d3mwpal d4kb1a\_ d1xl4a1  
d3vsqa\_ d2gixa1 d1p7ba1 d1nu0a\_ d1b9ra\_ d1offa\_ d1frra\_ d3wcqa\_  
d1e9ma\_ d1l5pa\_ d1wria\_ d1i7ha\_ d3av8a\_ d1rfka\_ d3p1ma1 d3b2ga\_  
d2bt6a2 d1mpya2 d1kw3b2 d1kw3b1 d4ghga1 d1tfza1 d3isqa1 d3isqa2  
d1sqia1 d1sqia2 d1lkda2 d1lkda1 d1mpya1 d1cjxa1 d1sp9b2 d1t47a1  
d1t47a2 d1f1ua2 d1sp8a1 d1sp8a2 d1f1ua1 d3nvva1 d1krha3 d2h88b1  
d1n62a2 d1t3qa2 d1kf6b2 d1zoyb1 d1jq4a\_ d1ffva2 d1dgja2 d1rm6c2  
d1r7ha\_ d1faaa\_ d1wika1 d1xfla\_ d1ttza1 d2f51a1 d1ti3a\_ d1nhoa\_  
d1sena\_ d2i4aa\_ d1ep7a\_ d1zmaa1 d1fo5a\_ d3lefa1 d3diea1 d2yana1  
d1z6na1 d1oaza\_ d3zywa1 d4aj8a\_ d1nm3a1 d4fiwa\_ d1wmja\_ d4hs1a1  
d1iloa\_ d1xwaa1 d1wjka1 d2vm1a\_ d1fb6a\_ d1gh2a\_ d1h75a\_ d1nw2a\_  
d1kx5b\_ d3a6na\_ d4m6ba2 d2nqbd\_ d3wkjd\_ d2yfwe\_ d4h9na\_ d5bnxa\_  
d1kx5c\_ d3r45a\_ d1eqzb\_ d4jjnb\_ d1f66c\_ d1eqza\_ d4wnnb\_ d1kx5a\_  
d1u35c1 d1id3a\_ d2nqbc\_ d1kx5d\_ d1ku5a\_ d1f1ea\_ d2b5ea2 d2b5ea3  
d2b5ea1 d2b5ea4 d2kp1a1 d2kp2a1 d1hyua4 d1j08a1 d1j08a2 d1pd212  
d1nhya2 d2a2ra2 d1k0dd2 d1f2ea2 d1gsua2 d1f3ba2 d2fhea2 d2pvqa1  
d1tw9a2 d1oyja2 d1e6ba2 d3ik7a1 d4is0a1 d1r5aa2 d1j1va2 d1m0ua2  
d3gtub2 d1z9ha2 d1okta2 d1axda2 d2gsra2 d1tu7a2 d1k3ya2 d1zgm1  
d1b48a2 d1gnwa2 d1gwca2 d2gsta2 d1glqa2 d1oe8a2 d1pn9a2 d1v2aa2  
d1fw1a2 d1duga2 d1lig8a1 d1czan2 d1czan3 d1czan1 d1lig8a2 d1czan4  
d1bg3a4 d1bg3a3 d1bg3a2 d1bg3a1 d1qusa\_ d4ilya\_ d4olta\_ d1qgia\_  
d3wyha\_ d4g9sa1 d3gxra\_ d1qqya\_ d1gd6a\_ d1f6ra\_ d1ivma\_ d2gv0a\_  
d1iiza\_ d2z2fa\_ d1j8xa\_ d1ghla\_ d1b9oa\_ d1741a\_ d1691a\_ d2o4wa\_  
d1p37a\_ d1k28a3 d1xjta1 d1jtma\_ d2f2qa\_ d4e97a1 d2pjsa1 d1klla\_  
d2i7ra1 d1ecea\_ d1xqaa1 d5cj3a1 d1jifa\_ d2p7oa\_ d1r9ca\_ d1nkia\_  
d1hroa\_ d4gedb\_ d3zooa\_ d1mz4a\_ d1gu2a\_ d1f1fa\_ d1dvva\_ d1c6ra\_  
d1c75a\_ d1e29a\_ d1gdva\_ d1cnoa\_ d1h32b\_ d1co6a\_ d2bh4x\_ d2aiua\_  
d5cytr\_ d1jdl1a\_ d1i8oa\_ d2zboa\_ d3dmia\_ d1ls9a\_ d1wvec\_ d2yk3a\_  
d3ph2b\_ d1dw0a\_ d5aura\_ d1q13a\_ d1qn2a\_ d1f1ca\_ d2bema\_ d1pama1  
d1ea9c1 d1qhoa1 d2fhfa2 d2fhfa1 d1k3ia1 d1j0ha1 d1csla1 d2bhua1  
d1edqa1 d1f1sa2 d1ut9a2 d1gvia1 d1txka1 d1etob\_ d1g2ha\_ d1s5ja2  
d1qhta2 d4dlea2 d1tgoa2 d3py8a2 d1q8ia2 d1kfsa2 d2py5a2 d1d5aa2  
d1qsta\_ d2beial d4m3sa\_ d1u6ma1 d1ygha\_ d1yk3a1 d3dr6a\_ d1xmta\_  
d1z4ea1 d2ge3a1 d1bo4a\_ d2fiaa1 d2jdca1 d1y9wa1 d3to7a\_ d1wwza1  
d2f14a1 d2ozua1 d2b5ga\_ d2cy2a1 d2p0wa\_ d1cm0a\_ d4pswa\_ d1yrea1  
d1yr0a1 d1m4ia\_ d2gana1 d1yvka1 d1ghea\_ d2g3aa1 d1y7ra1 d2euia1

d1q2ya\_ d2fsra1 d1xeba\_ d2ae6a1 d1cjwa\_ d1qsma\_ d2aj6a1 d1y9ka1  
d1i12a\_ d1vkca\_ d2atra1 d1n71a\_ d2d4pa1 d2fiwa1 d2fe7a1 d1tiqa1  
d2ou2a\_ d1yx0a1 d2fcka1 d1p0ha\_ d2j8ma\_ d2pq8a\_ d1z4ra1 d1s3za1  
d1ufha\_ d2hqya1 d2hqya2 d1ne9a1 d1lrza3 d1ne9a2 d1f37b\_ d1xvqa1  
d1pn0a2 d3hy2a\_ d2cvba1 d1o8xa\_ d1lu4a\_ d1we0a1 d2bmxa1 d2a4va1  
d1psqa\_ d1xiya1 d1q98a\_ d1n8ja\_ d1zofa1 d2ggta\_ d3tjja\_ d4je1a1  
d1o73a\_ d3s9fa\_ d2zcta\_ d1qmva\_ d2b1ka\_ d5dvba1 d2b5xa1 d2v2ga\_  
d1st9a\_ d3tb2a\_ d4llra\_ d4fh8a1 d1e2ya\_ d1knga\_ d2h30a\_ d1i5ga\_  
d2z9sa\_ d2f8aa1 d1tp9a1 d2b7ka\_ d1nm3a2 d3hvva\_ d2wfca1 d4kcea\_  
d1xvwa1 d4gqca1 d3qpma\_ d4k1fa\_ d1zzoa1 d1gp1a\_ d1prxa\_ d4od7a1  
d1z6ma1 d4mcua1 d4dvca1 d1r4wa\_ d3l9sa\_ d3rppa\_ d1f74a\_ d3l21a\_  
d2e1da\_ d1to3a1 d1w3ia\_ d1sfla\_ d1n7ka\_ d1vcva1 d4imea\_ d1wa3a\_  
d2ocza1 d1f2ja\_ d3m16a\_ d2yxga\_ d1ub3a\_ d3a5fa\_ d1fbaa\_ d1l6wa\_  
d1xfba1 d1wx0a1 d1vpxa1 d1mxsa\_ d2a4aa1 d1xkya1 d3cq0a1 d3s1xa\_  
d1f05a\_ d1fdja\_ d3cpra1 d4d2ja\_ d1e88a1 d1l6ja5 d1l6ja4 d1eaka4  
d1eaka3 d1l6ja3 d1h8pa2 d1etha2 d1w52x1 d2ppla1 d1hpla2 d2oxea1  
d1bu8a2 d1rp1a2 d1n9wa1 d1bbua1 d1e1oa1 d1b8aa1 d1l0wa1 d3a74a1  
d1eova1 d1lgya\_ d4l3wa\_ d1llfa\_ d1gz7a\_ d1lukca\_ d1lixra2 d1ra6a\_  
d1muka\_ d3gsza\_ d1khva\_ d1te9a\_ d2xwha\_ d3uqsa\_ d3hkwa\_ d3n6ma\_  
d2cjqa\_ d2xyma\_ d1teba\_ d1te8a\_ d1s48a\_ d1u09a1 d4wfxa\_ d3tyqa\_  
d2pgga1 d3zxha\_ d1cgl\_a\_ d1rm8a\_ d1eaka2 d1hy7a\_ d2jsda\_ d1cxva\_  
d1hv5a\_ d1i76a\_ d3p0ya1 d1igra1 d1igra2 d1n8yc2 d1n8yc1 d1m6ba2  
d1m6ba1 d4tlja\_ d2a2ua\_ d4wfva\_ d3t1da\_ d4iata\_ d3zq3a\_ d2nnda\_  
d1i4ua\_ d1kxoa\_ d1bbpa\_ d1kt7a\_ d1exsa\_ d3s26a1 d1l1f7a\_ d1qfta\_  
d4gh7a\_ d1z24a1 d1qabe\_ d1xkia\_ d1ew3a\_ d3bx7a\_ d4iawa1 d1n0sa\_  
d1gkab\_ d3kzaa\_ d2k23a\_ d2l9ca1 d2joza1 d1gm6a\_ d3kffa\_ d3saoa1  
d1e5pa\_ d1yupa1 d1iiua\_ d2tbvc\_ d1c8nc\_ d1x36a\_ d1smvc\_ d1ng0c\_  
d4sbvc\_ d1lopoa\_ d1f2nc\_ d1cixa\_ d1y29a\_ d1v7fa\_ d2jtba\_ d1d1ha\_  
d1g9pa\_ d1lupa\_ d1qk7a\_ d1mb6a\_ d2a2va\_ d1niya\_ d1hvwa\_ d2mpqa\_  
d1ie6a\_ d1kqha\_ d1la4a\_ d2mxoa1 d1d10a\_ d1koza\_ d1qk6a\_ d1emxa\_  
d1lqra\_ d1c6wa\_ d1rmka\_ d1ixta\_ d1eyoa\_ d1cnna\_ d1fu3a\_ d1glpa\_  
d1f3ka\_ d1fyga\_ d1rypd\_ d1irua\_ d1rypc\_ d3unfk\_ d1rypa\_ d1j2pa\_  
d1irui\_ d1j2qh\_ d3unfh\_ d1m4ya\_ d1rypb\_ d1irul\_ d1irug\_ d1iru2\_  
d1q5rh\_ d1rypg\_ d1g3ka\_ d1iruf\_ d1q5qa\_ d1e94a\_ d1irub\_ d1ryph\_  
d3ty6a\_ d1iruj\_ d1iruk\_ d1rype\_ d1irud\_ d1irue\_ d3mi01\_ d1rypf\_  
d1iruh\_ d2z3ba\_ d3mka2\_ d1irul\_ d1ny721 d1ny722 d1a6ca3 d1a6ca1  
d1pgl22 d1pgl21 d1pgl11 d1ny711 d1ofda3 d1ea0a3 d1ecfa2 d1q15a2  
d1ct9a2 d1ao0a2 d1te5a\_ d3ubub\_ d1egia\_ d1qo3c\_ d1v7pa\_ d1tdqb\_  
d3ubua\_ d1c3ab\_ d1h8ua\_ d3bx4b\_ d1t8ca1 d1sb2a1 d1qdda\_ d2ziba1  
d3cada\_ d1j34b\_ d1jwia\_ d1jzna\_ d1c3aa\_ d1oz7b\_ d1wmza\_ d3bdwb\_  
d1hq8a\_ d1fifa1 d1dv8a\_ d3hupa\_ d1wk1a1 d1umra\_ d2afpa\_ d3bx4a\_  
d1gz2a\_ d1sl6a\_ d1v7pb\_ d3g8ka\_ d1ixxa\_ d1j34a\_ d1jwib\_ d1gl1sa1  
d1y17a1 d1ja3a\_ d1fvub\_ d3bdwa\_ d1sb2b1 d1fvua\_ d1umrc\_ d1oz7a\_  
d4m17a\_ d3cfwa1 d1ypqa1 d1gl1ta1 d3fd4a\_ d3l9jc\_ d4dn8a1 d1v4lb\_

d1rd1l\_ d2msba\_ d4w9ta\_ d1jvna1 d4x2ra1 d1qo2a\_ d4axka1 d1thfd\_  
d1h5ya\_ d4u28a\_ d2y88a\_ d4wd0a\_ d1vzwa1 d2flia1 d1rpxa\_ d1tqja\_  
d1tqxa\_ d4lt9a1 d3tc7a1 d3hoja\_ d1i4na\_ d3vnda\_ d3n18a1 d1geqa\_  
d3naval d1v5xa\_ d4a2ra1 d3tc6a1 d1ujpa\_ d4ijba\_ d1xcfa\_ d1vc4a\_  
d1rd5a\_ d1qopa\_ d3b5va\_ d2r80b\_ d1cqxa1 d1cg5a\_ d1gcvb\_ d3boma\_  
d2h8fb\_ d2raoa\_ d3bj1a\_ d4hrrb\_ d2r50a\_ d3d1kb\_ d2aa1b1 d3zhwa\_  
d3hf4b\_ d3gdja\_ d1jebb\_ d3bj1b\_ d1x9fb\_ d1wmub\_ d1gcva\_ d3bcqb\_  
d3d4xb\_ d2dc3a\_ d3hf4a\_ d4yu3a\_ d3k8ba\_ d1qpwb\_ d2r80a\_ d3bcqa\_  
d1v4wa\_ d3wtgb\_ d1j17a\_ d4esaa\_ d1a9we\_ d3d1ab\_ d1fsla\_ d4h21a\_  
d1v4wb\_ d1mwca\_ d1vhba\_ d1jeba\_ d1spgb\_ d1h97a\_ d1q1fa\_ d1tu9a1  
d3d1aa\_ d1hdsb\_ d3hyub\_ d2zfb\_ d3fs4a\_ d1oj6a\_ d1shrb\_ d4h21b\_  
d4yu3b\_ d1spga\_ d3hrwa\_ d3qqra\_ d3at5a\_ d4wchd\_ d3hyua\_ d1cg5b\_  
d1uc3a\_ d1hbra\_ d2raob\_ d1outb\_ d4esab\_ d3gdjb\_ d3qqqa\_ d1x9fc\_  
d3vrf\_ d1litha\_ d3mkba\_ d3d4xa\_ d3mjpa\_ d1j16a\_ d3fh9a\_ d1outa\_  
d2dc3b\_ d1it2a\_ d3eoka\_ d3g46a\_ d1qpwa\_ d3vrfb\_ d1ch4a\_ d1x9fd\_  
d1hdsa\_ d2zfa\_ d3mkbb\_ d1or4a\_ d3wtga\_ d1a4fa\_ d3fh9b\_ d3bomb\_  
d3cy5a\_ d3at5b\_ d1x9fa\_ d2oifa\_ d4lmb\_ d1cpcb\_ d3v57a\_ d1kn1a\_  
d1cpca\_ d4f0ta\_ d2vjha\_ d4po5b\_ d1eyxa\_ d1alla\_ d4f0tb\_ d1b8db\_  
d4h0mb\_ d1b33a\_ d2vjhb\_ d4lm6b\_ d2vmlb\_ d1allb\_ d2vjta\_ d3dbja\_  
d2vmla\_ d2vjtb\_ d4f0ub\_ d1f99b\_ d4rmpa1 d1liaa\_ d1eyxb\_ d2uulb\_  
d4lmsb\_ d4f0ua\_ d2bv8a\_ d1f99a\_ d2bv8b\_ d2c71b\_ d3dbjb\_ d4rmpb1  
d1b8da\_ d4h0ma\_ d3v57b\_ d1kn1b\_ d1liab\_ d2uula\_ d2j96a\_ d1pjqa1  
d1f00i3 g1wh1.1 d2xqfa\_ d1ea5a\_ d1f6wa\_ d1qe3a\_ d1k4ya\_ d4qwwa\_  
d2ha2a\_ d1jmx4 d1jmx3 d1pbya4 d1xm5a\_ d1xaxa\_ d1tvia\_ d4iuua3  
d4bvva\_ d5hpga\_ d3k65a\_ d1ki0a3 d1ki0a2 d1ki0a1 d1a0ha1 d1pmla\_  
d3sp8a3 d2feba1 d1xova2 d2m5ta\_ d1cqqa\_ d1wqsa\_ d5bpea\_ d2ipha\_  
d1lvoa\_ d2bhga1 d3tnta\_ d3sjia\_ d3d23a1 d2fyqa\_ d3tloa\_ d3zvea1  
d2hrva\_ d3q3ya1 d4asha1 d1yloa2 d1y7ea2 d1y0ya3 d1lfwa1 d1vixa1  
d1fnoa4 d1vhoa2 d1ysja1 d1vhea2 d1z21a1 d2fvga2 d1vgya1 d1r3na1  
d2grea2 d1xmba1 g1q71.1 d1rtqa\_ d3rp2a\_ g1lucy.1 d1fuja\_ d2zchp\_  
d3w94a\_ d1si5h\_ g2pka.1 d1cgha\_ d1kigh\_ d1a5ia\_ d3s9ba\_ d1hj8a\_  
d1ao5a\_ d2anya\_ d1q3xa1 d1gvza\_ d1azza\_ d4gsoa\_ d2f91a1 d1iaua\_  
d1gdna\_ d1eufa\_ g1fiw.1 d1eq9a\_ d4nfea\_ d2rdla\_ d1spja\_ d1elva1  
d1a7sa\_ d1ekbb\_ d1pfxc\_ d1yc0a\_ d2aiqa\_ g1fiz.1 d1fi8a\_ d4k60a\_  
d4dgja\_ d1mzaa\_ d1op0a\_ d3tjva\_ d1pytd\_ d1sgfg\_ g1gg6.1 d2eeka\_  
g1rtf.1 d1a0ja\_ d3g01a\_ d1pytc\_ d4e7na\_ d1ddja\_ d1z8ga1 d2hlca\_  
d1npma\_ d1brup\_ g1jou.1 d1sgfa\_ d1autc\_ g2hnt.1 g1kdq.1 d1orfa\_  
d3s69a\_ d4crga\_ d1fxya\_ d1bqya\_ d2ftba\_ d1pmpa\_ d2rcqa1 d1fdqa\_  
d4lkpa\_ d1sa8a\_ d1vyfa\_ d1lpja\_ d3vg7a1 d4azqa1 d1o8va\_ d5bvqa\_  
d1p6pa\_ d2qo4a\_ d1opba\_ d1yiva1 d1o1va\_ d4bvma1 d4tkba\_ d4i3ba\_  
d1ftpa\_ d1ggla\_ d4gkca\_ d1cbia\_ d3p6da1 d1kqwa\_ d2a0aa1 d1m41a\_  
d2bk7a\_ d3fjua\_ d1z5ra1 d1kwma1 d1uwya2 d1jqga1 d2c1ca1 d1tda\_  
d1h81a2 d4lu0a\_ d3unda1 d3e9aa1 d1vr6a2 d1n8fa\_ d2qkfa\_ d1d9ea\_  
d1o60a\_ d2i49a\_ d1nnfa\_ d1xvxa\_ d1ursa\_ d1h3da1 d1iuda\_ d4m1va1

d1twya\_ d3e13x\_ d2nxoa1 d4pfua\_ d3ttma\_ d1elja\_ d2qmw1 d1us5a\_  
d1y3na1 d1jeta\_ d1uqwa\_ d4f19a1 d2esna2 d3thia\_ d3fasa1 d2uyeb\_  
d2xwva1 d1r9la\_ d2fyia1 d1pb7a\_ d2ozza1 d1sw5a\_ d1nh8a1 d1vr5a1  
d2g29a\_ d1xs5a\_ d3lswa\_ d2z23a\_ d3w9va\_ d3tcha\_ d1q35a\_ d1z7me1  
d3q27a\_ d1p99a\_ d1ve4a1 d2i6ea1 d4mcoa1 d4n8ya\_ d1eu8a\_ d1zbma1  
d1hsla\_ d1ixca2 d1j1na\_ d1xvya\_ d1y9ua\_ d2z22a1 d1xoca1 d4oera\_  
d1wdna\_ d5f1qa1 d1xt8a1 d1i6aa\_ d4gwoa\_ d4igta1 d1pc3a\_ d4mmpa1  
d1o63a\_ d2cz1a1 d2onsa2 d4mija1 d1eh3a\_ d3skpa\_ d1dtza1 d1dtza2  
d1jnfa2 d1ce2a1 d1jnfa1 d1b1xa2 d1b1xa1 d1jw1a1 d1jw1a2 d1ryoa\_  
d1h76a1 d1h76a2 d3q3ma\_ d1za0a1 d1mxra\_ d2inca\_ d1jk0a\_ d2incb\_  
d1mhyb\_ d3hf1b\_ d1mtyb\_ d1r2fa\_ d2uw1a\_ d1mhyd\_ d3n37a\_ d1afra\_  
d1oquc\_ d1syya\_ d1mtyd\_ d2o1za\_ d1uzra\_ d1smsa\_ d2fkza\_ d1zujal  
d1s3qa1 d2fjca1 d1z6om1 d1veia\_ d4dyya\_ d1jiga\_ d3gvya\_ d2pyba\_  
d4cy9a1 d3bvfa1 d1r03a\_ d2cf7a\_ d1nf4a\_ d1zs3a1 d4iwka\_ d3ka8a\_  
d3np0x\_ d1lb3a\_ d4e6ka\_ d1z6oa1 d2fzfa1 d4dyua\_ d3ge4a\_ d1jgca\_  
d4am4a\_ d2z6ma\_ d1ji5a\_ d1vlga\_ d1lkoa1 d1krqa\_ d3qz3a\_ d1o9ra\_  
d2ffxj\_ d1euma\_ d1yv1a1 d2v2pa\_ d1j30a\_ d4di0a\_ d1dpsa\_ d2cbia2  
d2choa2 d1l8na1 d1oewa\_ d2qzxa\_ d2asia\_ d1psoe\_ d1miqa\_ d1smra\_  
d2h6ta\_ d1pfza\_ d1izda\_ d3hd8a\_ d1j71a\_ d4aa9a\_ d1t6ex\_ g1b5f.1  
g1lya.1 g1htr.1 d1qdma2 d1bxoa\_ d1wkra\_ d1tzsa\_ d1libqa\_ d2qzwa\_  
d1bdqa\_ d3ggta\_ d3ixoa\_ d1mrxa\_ d2haha\_ d1tw7a\_ d4njsa\_ d1sgua\_  
d2p3da\_ d1nsoa\_ d3d3ta\_ d2rkfa\_ d2rspa\_ d3ogpa\_ d3ekwa\_ d2o4na\_  
d2j9ja\_ d1baia\_ d3ggua\_ d3lzua\_ d4npua\_ d4j55a\_ d2r8na\_ d2fxda\_  
d2p3ca\_ d4dqea\_ d3ttpa\_ d3t3ca\_ d2p3aa\_ d2hc0a\_ d2fdda\_ d3mwsa\_  
d1sr9a2 d1rqba2 d1k8rb\_ d1wgra1 d1ef5a\_ d1wfy1 d1e8ya3 d1wgya1  
d1l1fda\_ d2cs4a1 d1wxma1 d2byea1 d3kh0a1 d2byfa1 d1wxaa1 d1e7ua3  
d1wgda1 d1wga1 d4q5eb\_ d1wjna1 d1se9a\_ d3n3kb\_ d1wz0a1 d1we6a1  
d2m0xa\_ d2gbka\_ d3rt3b1 d1wh3a1 d1sifa\_ d2ekek2 d4ii2b1 d4hk2a1  
d1c3ta\_ d1m94a\_ d1wgha1 d1ttna1 d1j8ca\_ d1wx8a1 d3v6cb1 d2ma9b\_  
d4i61b1 d1bt0a\_ d2jvca1 d1iyfa\_ d2k1fa\_ d1wxva1 d1wf9a1 d1t0ya\_  
d2io0b2 d1x1ma1 d2gbma\_ d1zw7a1 d2m17a\_ d1ud7a\_ d1we7a1 d2lwp\_a  
d2gbja\_ d1wjua1 d1v6ea1 d1v86a1 d4eewa\_ d1w1aa1 d4icva\_ d4gu2a\_  
d1wx7a1 d1wy8a1 d4hjka1 d2faza1 d1v5oa1 d3ruib\_ d1eo6a\_ d3waob\_  
d2r2qa1 d3m95a\_ d3wana\_ d2h0ba\_ d2erfa\_ d1h30a1 d3mw4a1 d1pz7a\_  
d2r1ba\_ d3v64a1 d1d2sa\_ d3bopa1 d3mw3a1 d1okqa1 d1okqa2 d1wioa4  
d1ccza2 d1vcaa1 d1dr9a2 d1lic1a1 d2d9qb1 d2nxyb2 d1adqa1 d1fnga1  
d1uvqb1 d1zs8a1 d2vola1 d2vola2 d1mfb12 d2jelh2 d1uwel2 d3qq4b1  
d1k1vb\_ d1k5na1 d1osph2 d4odh12 d1ow0a1 d1ow0a2 d1bfob2 d3l9ra2  
d3jtth1 d2fath2 d4elkb2 d1fn4b2 d2xfxb\_ d1pg7x2 d1cqka\_ d4k71b2  
d1l1k2a1 d1eapb2 d4l1fhg2 d1i4fa1 d2nw2a2 d1kfah2 d1mhca1 d1h3ua1  
d1wejh2 d1h0db2 d1a5fh2 d1kcvh2 d1mjuh2 d1qqda1 d1kcrh2 d1k8ia1  
d3huja2 d2nnab1 d1nfd2 d3mffb2 d1s9va1 d1l1k3h2 d1q0x12 d1fv1b1  
d1neza1 d4rfeb2 d1r3ha1 d1a6tb2 d1k1jva1 d1pz5b2 d1onqa1 d2bc4a2  
d1de4a1 d1k8da1 d1tcra2 d1dn0b2 d1nfd2 d2xwtb2 d1bfoa2 d1mexh2

d1iakb1 d1ypzf2 d4f7ea2 d1q72l2 d2fbjh2 d1fe8h2 d1clzh2 d1fnqb1  
d1uvqa1 d1vgka1 d1c16a1 d4j12a2 d4x99b2 d1igtb3 d1je6a1 d1q72h2  
d1nldh2 d1teth2 d1i1ca2 d1i1ca1 d1k8ib1 d1q0yh2 d1kfal2 d3frua1  
d1pg7w2 d1u58a1 d1igyb4 d1igyb3 d1hyrc1 d1klub1 d1deeb2 d1c12b2  
d2bc4b2 d2ig2h2 d1kcvl2 d3wn5b1 d1lk2b\_ d1lk3l2 d1mju12 d1sm3h2  
d1q0xh2 d1zvsa1 d1ydpal d1u8ib2 d1ypze2 d1kcuh2 d2e3fa\_ d1mm0a\_  
d2e3ea\_ d2l1da\_ d2ny8x\_ d2e3ga\_ d2ny9x\_ d2nz3a\_ d2l1j7a\_ d1n4na\_  
d2m8bb1 d2kyqa\_ d3psma\_ d1jxca\_ d2g11a\_ d1ugla\_ d4uj0a\_ d2k4ua\_  
d1hp2a\_ d2lu9a\_ d1baha\_ d2meoa1 d1wm7a\_ d1hlya\_ d1n8ma\_ d1jlza\_  
d1wpda\_ d1c55a\_ d1pvza\_ d1wt7a\_ d1wz5a\_ d1m2sa\_ d1pjva\_ d1c49a\_  
d1qkya\_ d2ktca1 d1wmta\_ d1du9a\_ d1j5ja\_ d1rlga\_ d1t0za\_ d2i61a\_  
d1t1ta\_ d1sn4a\_ d1kv0a\_ d2lkba\_ d1npia\_ d1wwna\_ d1pe4a\_ d2kbka\_  
d2li7a\_ d1djta\_ d2kbha\_ d1dq7a\_ d1sega\_ d1omya\_ d1zywa1 d1jzaa\_  
d1bnla\_ d1t61c1 d3g48a1 d1gd7a\_ d1mkha\_ d1pyba\_ d1y14b1 d2nn6i1  
d1i94l\_ d2zjra2 d1smxa\_ d2qamc2 d2r7da1 d1rl2a2 d1wfga1 d3bzka4  
d1x6oa2 d3a0ja\_ d2j01d2 d2ja9a1 d4q15a\_ d1hr0w\_ d1luza\_ d2n3sa\_  
d2vnud1 d1h95a\_ d1go3e1 d2nn6h1 d1ne3a\_ d2mola\_ d1iz6a2 d1jjga\_  
d1e3pa2 d2ix0a3 d2ix0a2 d2lxja\_ d1ueba3 d1ueba2 d2z0sa1 d1u0la1  
d2ix0a1 d2eifa2 d2je6i1 d3i2za1 d2c35b1 d2ahob2 d1t9ha1 d3i4oa\_  
d2qall1 d1jt8a\_ d2nn6g1 d1g6pa\_ d3cama\_ d1i94q\_ d1c9oa\_ d1d7qa\_  
d2ba0a1 d2vnud2 d2vnud3 d1khia2 d2qalq1 d1wi5a1 d1xtda2 d1ny4a\_  
d1dgsa2 d1fvial d1ckma1 d1x9na2 d1pfsa\_ d2a1ka\_ d1rpma\_ d2shpa1  
d1yfoa\_ d1l8ka\_ d2ooqa1 d1g4us2 d1p15a\_ d1lara2 d1lara1 d1wcha\_  
d2fh7a2 d2fh7a1 d1ohea1 d1ohea2 d2f4da\_ d1rxda\_ d2hxpa\_ d1xria\_  
d1d5ra2 d1fpza\_ d3ezza\_ d4y2ea\_ d1i9sa\_ d3azya\_ d3wvja\_ d1upsa1  
d1ajoa\_ d2hyka\_ d1ajka\_ d2vy0a\_ d3o5sa\_ d3d6ea\_ d3atga\_ d1dypa\_  
d1umza\_ d3i4ia\_ d1c1la\_ d4lbqa\_ d1a78a\_ d1slta\_ d4no4a\_ d3zsja\_  
d3duia\_ d1g86a\_ d1qmja\_ d1hlca\_ d1tdha3 d1q3ba3 d1ee8a3 d1k82a3  
g1qmo.1 d3zyra\_ d1fnya\_ d1n47a\_ g2ltn.1 d1avba\_ d3usua\_ d1dhkb\_  
d1f9ka\_ d1ukga\_ d1g8wa\_ d1g9fa\_ d1wbfa\_ d3wcsa\_ d1g7ya\_ g1loe.1  
d1mvqa\_ d1hq1a\_ d1v6ia\_ d1dbna\_ d1qnwa\_ d1fx5a\_ d4l8qa\_ d1ioaa\_  
d3n35a\_ d3ubra\_ d1qo8a1 d1d4ca1 d2k3va\_ d1ft5a\_ d1qdba\_ d1mlqa\_  
d2j7aa\_ d1h21a\_ d1ogyb\_ d4fasa\_ d1jnia\_ d1sp3a\_ d3h33a\_ d1rwja\_  
d19hca\_ d1os6a\_ d3bxua\_ d3h4na\_ d1i77a\_ d3caoa\_ d1j0pa\_ d2ctha\_  
d1duwa\_ d1ofwa\_ d2e84a\_ d1hh5a\_ d1gyoa\_ d3h34a\_ d1dszb\_ d1a6ya\_  
d3cbba\_ d1ynwa1 d1r4ia\_ d1hcqa\_ d2hana\_ d2hanb\_ d2enva1 d1kb4b\_  
d2n11b\_ d1lola\_ d1cita\_ d2dara2 d2dara1 d1wyha2 d2dloa2 d1rutx4  
d1rutx3 d2cuqa2 d1x4la2 d1x4la1 d1x3ha2 d1x3ha1 d2d8za1 d1x61a2  
d1x6aa1 d1x6aa2 d2cora2 d2cora1 d1v6ga1 d1v6ga2 d2d8za2 d1x64a1  
d1x64a2 d1b8ta1 d2co8a1 d1x63a2 d2dj7a2 d2dj7a1 d2cu8a2 d2cu8a1  
d1g47a2 d1g47a1 d1j2oa1 d1wyha1 d2dloa1 d1wiga1 d1wiga2 d2cupa2  
d2cupa3 d1x68a1 d2d8ya2 d2d8ya1 d1m3va2 d1x62a1 d1x68a2 d1x61a1  
d1b8ta3 d1b8ta2 d2d8xa2 d2d8xa1 d1x4ka1 d1x4ka2 d2cuqa1 d1m3va1  
d2co8a2 d1x63a1 d2cura1 d2cura2 d1x62a2 d1op9a\_ d1y0la1 d1etzbl

dlegj11 d2gsib1 d1nj9a1 d4jfhd1 d1aqk11 d1t2ja\_ d1lo4h1 d1zvya1  
d3v4vl1 d4enec1 d1kxtb\_ d5e8ea1 d2pxya\_ d4weud\_ d1xiwc\_ d2esvd1  
d1qznh\_ d1ogae1 d1f4xh1 d4n1hb\_ d3ezjb1 d3mlwl1 d1kfah1 d1etza1  
d1b4jh1 d3cfic\_ d4w68a\_ d2arja1 d1lek3a\_ d2ok011 d1vera\_ d1uwgh1  
d1blnb1 d1fpth1 d1rzga1 d2giya1 d4m3kb1 d1nc2a1 d2nyyd1 d1ncna\_  
d1fbih1 d5dxwa\_ d4fqqa1 d1dqdh1 d1jfq11 d1kelh1 d1faih1 d1frgl1  
d1fig11 d4m6n11 d1fo0a\_ d4hxb11 d3b5ga\_ d3quyd1 d2h9gb1 d1i8kb\_  
d2dd8h1 d2ck0h1 d1eaja\_ d4w6wb1 d2a6ib3 d1t66d1 d2e27h\_ d1ob1b1  
d1f11b1 d2v7na1 d1ad0a1 d2xt1b1 d1pskh1 d4i13b1 d2op411 d1a0q11  
d1uwe11 d1za3a1 d1ncb11 d4uu9a\_ d1bm3h1 d1cloh1 d1nqba2 d1cf8h1  
d4y5va\_ d1mhph1 d5anma1 d4cdgc1 d4ldeb\_ d1y01b1 d2pcpb1 d1z3gl1  
d1dfb11 d1fh5h1 d3g5xa1 d1tzib1 d4dn311 d3zhka1 d2b1hh1 d2uyla1  
d1f3dh1 d1nj9b1 d2agjh1 d2h1pl1 d1q72h1 d8fabb1 d1ndmb1 d1rjca1  
d4u6hb1 d3upca\_ d2fbj11 d1osph1 d1tvda\_ d2cjh\_ d4fhbd1 d1bd2d1  
d1rz7h1 d3nn8a\_ d1knoa1 d1nfda1 d2bmkb1 d1dq11\_ d1igyb1 d1igfl1  
d12e8h1 d3utza1 d1nc2b1 d1rihh1 d4mwfb1 d4jvpa1 d1mieh1 d1rhfa1  
d1fgn11 d1sbsh1 d1lp9e1 d1dn0a1 d4lqf11 d1iaih1 d1kgcd1 d1mh5b1  
d1gpo11 d2g60h3 d1f8t11 d2jixd1 d4grwh\_ d1fo0b\_ d1bfob1 d1axsa1  
d1u9ka\_ d1nmbh\_ d1h8na1 d1h8na2 d1jguh1 d4eura1 d3sdy11 d35c8h1  
d1w7211 d1mvub\_ d1i9rh1 d1ob1a1 d4wenb\_ d1yeeh1 d3ietc1 d1f58h1  
d1ad0b1 d1mqk1\_ d1nbvh1 d4b50a\_ d3r8bb\_ d1baf11 d1mamh1 d4rgnel  
d2gsgb\_ d35c811 d1bafh1 d1aih1 d2pcpa1 d2fath1 d2x1pa\_ d1orsb1  
d1ibg11 d1shma\_ d1a2yb\_ d1u0qa\_ d2coqa\_ d1hilb1 d1qfwi\_ d1jv5b\_  
d1fn4b1 d5e0qa\_ d1nsnh1 d1plgl1 d4ocx11 d1kb5h1 d1rzhf1 d1pg7x1  
d2fx7h1 d2oi9c\_ d1l7i11 d3eyva1 d1d5i11 d4ffyl\_ d1tet11 d1a6wh\_  
d1ac6a\_ d3dvfa\_ d1nfde1 d1mimh1 d1ri8a1 d1jhlh\_ d3dura\_ d1fskb1  
d1f97a1 d3so3b1 d2ak4d1 d1lp9f1 d4z7wf1 d1l7th1 d4y5ya\_ d4x7ec1  
d1emth1 d1ikf11 d1nlbh1 d4utal1 d1bjma1 d1eapb1 d1u6ah1 d2dtgd1  
d1kj2b\_ d1xeda1 d1cleh1 d1fgvh\_ d2bnub1 d2fb4h1 d2dtgb1 d1ktrh\_  
d1jpth1 d1qkz11 d4hepg\_ d2atpb1 d1flrh1 d2hrp11 d1mvfa\_ d1iaim1  
d3k80a1 d2jb5h1 d3zkxc\_ d4grwe\_ d1it9h1 d1rhhb1 d3w9ec\_ d1e4wh1  
d1sy6h1 d2j6eh1 d3qxta\_ d1jglh1 d1p7ka1 d1tzhb1 d4n8pa1 d1gaf11  
d2jelh1 d1wioa2 d4i0cc1 d1cicb1 d1lmka2 d1lmka1 d1iqwh1 d1lorqb1  
d1ejoh1 d1jnlh1 d4zga1\_ d43c9b\_ d1ggbl1 d1wejh1 d3q6fa1 d1f3dj1  
d3c6la1 d1bqlh1 d3p9wb\_ d1a3r11 d1h0db1 d2uzil\_ d1eo811 d1qfwl\_  
d1n7ml1 d1igja1 d1c5ch1 d2a9mh\_ d1rmfh1 d1fj1b1 d4heme\_ d1ccza1  
d1a5fh1 d1ogad1 d1dlfh\_ d1qa9b\_ d1vge11 d3qskb\_ d1sjxa\_ d4ozfg1  
d1sq2n\_ d1qd0a\_ d1kcvh1 d1c5db1 d3qcull1 d8faba1 d3bn9d1 d1mjuh1  
d4y8dc\_ d7fabh1 d3dvgb1 d1lo011 d1a6tb1 d1gigh1 d1kcrh1 d2hwz11  
d1yjdcl d3clfl1 d4krna\_ d1d171\_ d1e6o11 d1mexh1 d3r0ma\_ d4kkna\_  
d1fns11 d1oaqh\_ d1rzia1 d1lucbh1 d1ncw11 d4b41a\_ d1nfd11 d2mpah1  
d2d7t11 d4grwf\_ d4b5ea\_ d1lk3h1 d3u79a\_ d4u3xa\_ d1ghf11 d1bvkb\_  
d1mcww1 d1b88a\_ d1jrhh1 d32c2b1 d4wemb\_ d1dsfh\_ d1op3h1 d1ce111  
d1iqda1 d1qoka1 d1qoka2 d1qfuh1 d2crya1 d1ay1h1 d1oaql\_ d3ab0b\_

d1rur11 d1t4kb1 d1bz7b1 d1n0xh1 d1for11 d1lucb11 d4w6yb\_ d43c9a\_  
d2aabl1 d1tzia1 d4n1ca\_ d1k6qh1 d3g9ab\_ d4tvsa1 d1ligmh\_ d1pz5b1  
d3dx9a1 d3wxwh\_ d1nakh1 d1kcul1 d3eaka\_ d4qlra1 d1cr9l1 d1d9ka\_  
d1f4x11 d1deea1 d2i27n2 d1c12a1 d2orbl1 d1j8hd1 d1mcp11 d1c5da1  
d1kenh1 d1bd2e1 d1h5ba\_ d4x7fc1 d3upaa\_ d1t3fa1 d1lindh1 d2dtgc1  
d4hc111 d1zv5a1 d4wgvb\_ d1uwgl1 d4f37k1 d1aqkh1 d1vesa\_ d3zkqd\_  
d1fpt11 d1lo4l1 d1knob1 d3rrqa\_ d1ct8b1 d4orz\_ d1mlbb1 d4hgkc1  
d1dqdl1 d1bogb1 d4ozhe1 d1dr9a1 d1i7za1 d1dn0b1 d1kell1 d1rzib1  
d1ypzf1 d1wtla\_ d1hkfa\_ d1fail1 d1figh1 d2vyre\_ d1sjva\_ d1ohqa\_  
d1bfoa1 d1pkqb1 d1mjul1 d1b4j11 d1nsn11 d2arjb1 d1p4bh\_ d4aj0a\_  
d3nn8b\_ d2rcja1 d1f2xk\_ d4v1dd\_ d1adqh1 d2eksa\_ d4k3ga\_ d1jfqh1  
d1uweh1 d1frgh1 d4gftb\_ d1uz8b1 d4n1ea\_ d1bm3l1 d1clol1 d3mcka1  
d2vq1a1 d1ae6h1 d4aq1b1 d1uj3b1 d1nbqa1 d1fh5l1 d2ck0l1 d2ywza\_  
d1q72l1 d4nbxb\_ d1hila1 d4hz1b1 d2j88l1 d1zmya1 d1cd0a\_ d1a4ka1  
d1psk11 d1a0qh1 d4krmb\_ d1ncbh1 d2fbjh1 d1j8he1 d1i3ua\_ d1cf8l1  
d1fe8h1 d2p1ya1 d1eeqa\_ d2x89a\_ d1ol0a\_ d2r0lh1 d1ub5a1 d1dfbh1  
d3eyvb1 d4jdvb1 d4p2cg\_ d2gsia1 d2agj11 d1u3ha1 d2h1ph1 d1rihl1  
d1fskc1 d1boga1 d2a77l1 d1ospl1 d1qfoa\_ d3dwta\_ d2fx7l1 d1rz7l1  
d3stba1 d1pkqa1 d1b6da1 d1dzba2 d1dzba1 d1kj2a\_ d4l1ha\_ d1rzgb1  
d1dq1h\_ d12e8l1 d1mie11 d1jmaa\_ d1sbs11 d1fgnh1 d1f58l1 d1mqkh\_  
d1ndgb1 d3qegl1 d1iail1 d2aw2a1 d1tqbc1 d3fo2a1 d4dkaa\_ d1f8th1  
d2g60l1 d2ywya\_ d1uj3a1 d1yc7a\_ d3bd3a\_ d4w6xb1 d1nmb1\_ d1i8ka\_  
d1rjlb1 d1ypze1 d1p7kb1 d1kxqe\_ d1gpoh1 d2z4qa1 d1w72h1 d1i9rl1  
d4qgya1 d4xt1c\_ d2qqnh1 d1cica1 d3c08h1 d2cd0a\_ d2bdnh1 d1hnga1  
d1mam11 d1nldh1 d1cr9h1 d4lcih1 d3bkyl1 d3qg7l1 d1ai1l1 d1kxvc\_  
d4iosd\_ d1l7ih1 d2x1qa\_ d1ub6b1 d3k74b\_ d1ibgh1 d1teth1 d1igya1  
d1hxma1 d2x6ma\_ d2e7la\_ d5e03a\_ d1qfwm\_ d2r0kh1 d1igjb1 d1rurh1  
d1plgh1 d1mj8h1 d1yuhb1 d3fmg11 d1rzf11 d1emt11 d1ad9b1 d1igtb1  
d1nlbl1 d1d5ih1 d3k7ua\_ d4ffyh\_ d1bwwa\_ d3dvga1 d1a6ta1 d1fgvl\_  
d4qxgl1 d1mim11 d1jh11\_ d2hffb1 d2hh0l1 d1qkzh1 d1l7tl1 d1afvh1  
d1iaii1 d2cjuh\_ d1um5h1 d2ghwb2 d2ghwb1 d1kgce1 d2fgwh1 d1ikfh1  
d1dvfd\_ d2i24n1 d2xtjb\_ d1za3b1 d2yc1a\_ d2hh0h1 d2x1oa\_ d1bvka\_  
d1rjla1 d5e7ba1 d1igta1 d1il1b1 d2fb4l1 d1mvua\_ d1jpt11 d32c2a1  
d1fvca\_ d1liqdb1 d2hrph1 d2p4ab\_ d4qola\_ d1p2cb1 d1wt5c\_ d1t4ka1  
d5c1mb\_ d1it9l1 d1bz7a1 d1b2wh1 d1e4wl1 d1jnl11 d1yedb1 d1za6b1  
d3u7aa\_ d1ligfh1 d3gnml1 d1orsa1 d1wejl1 d1a2ya\_ d1hxmb1 d1gafh1  
d2j4wh1 d1pz5a1 d1j05a\_ d1a3rh1 d4fq1l1 d1qfwh\_ d1eo8h1 d1n7mh1  
d4s11a\_ d1kegh1 d5da4a\_ d1iqwl1 d3whxb1 d1vgeh1 d1deeb1 d1c12b1  
d1t2ql1 d1ad9a1 d3gsnb1 d3b2uc1 d1ggbh1 d1t3fb1 d1nakl1 d4ocmc\_  
d1lila1 d2v7hb3 d2esve1 d1mcoh1 d2qr0b1 d2q3aa\_ d1ct8a1 d1kcr11  
d2pxyb\_ d2uzih\_ d5c3ld\_ d3durb\_ d1c5c11 d2ak4e1 d1d17h\_ d1xiwd\_  
d1mlba1 d1rmf11 d1i7zb1 d1dlfl\_ d2xa3a\_ d5bq7b1 d1dqqb1 d3h42l1  
d1legjh1 d1kcv11 d1fe8l1 d2j6e11 d1f3rb2 d1lk3l1 d1sm3h1 d1q0xh1  
d1ghfh1 d7fab11 d1igch1 d1lo0h1 d4idla\_ d5c2b1\_ d1jrh11 d1il1a1



d3zhda1 d4kfzc\_ d1b0wa\_ d1e6oh1 d1mexl1 d4krpb\_ d1fnsh1 d1ncwh1  
d4hgma\_ d4eigb1 d4rzca\_ d2mpa11 d4y5xa\_ d5en2b1 d3lrga1 d4ej1c1  
d1rha1 d1j05b\_ d1forh1 d1q9wb1 d2wzpd\_ d2aq2a1 d1h0da1 d3revb1  
d2ij0c1 d1tzha1 d4m7j11 d1k6q11 d3b9kc1 d1igml\_ d3geua1 d1dsfl\_  
d1celh1 d1kcu1 d1zvha1 d1zvoa1 d1tqbb1 d1ay111 d2qsc11 d2cgrh1  
d1n10h1 d1ken11 d3eo0a1 d4n9ob1 d1n0x11 d3k1kc\_ d2aq2b1 d1ck1a1  
d1lenfa1 d1i4pa1 d1v1oa1 d1et9a1 d1esfa1 d2g9hd1 d4ohja1 d1klud1  
d1bxta1 d1eu3a1 d1ty0a1 d1fnua1 d2cqva1 d1fhga\_ d2k1ma\_ d2d12a1  
d1biha3 d1biha1 d1biha4 d3qp3a1 d1g1ca\_ d1gxea\_ d1cvsc2 d1cvsc1  
d1xmwa2 d2otpa2 d1biha2 d1rhfa2 d2fcba2 d2fcba1 d1wwbx\_ d1gsma2  
d1lepfa1 d1lepfa2 d2dava1 d1waaa\_ d1f97a2 d1x44a1 d1vcaa2 d1fnla2  
d1fnla1 d3b5ha2 d3h8na2 d3h8na1 d1bjba1 d1bjba2 d1pd6a\_ d1f2qa2  
d1f2qa1 d3cx2a\_ d1nbqa2 d3b5ha1 d1n26a1 d1xiwb\_ d1xaua\_ d1fltx\_  
d2ifga1 d1olla1 d1olla2 d1cs6a4 d1cs6a3 d1cs6a2 d1cs6a1 d2gw5a2  
d1sy6a1 d1xiwa\_ d1ucta2 d1ucta1 d1ry7b2 d1g14b\_ d1qz1a3 d1olza1  
d2c9aa1 d1wwca\_

**Family-66 (c.37.1.8)**

**Positive dataset contains 94 protein sequences.**

d1z0ja1 d3umra2 d3gj0a1 d2gaoa1 d1yzga1 d1x3sa1 d2o52a\_ d1zcaa2  
d1zcba2 d2fv8a1 d2cjwa\_ d3dz8a1 d1xzpa2 d1vg8a\_ d4qxaa\_ d2ew1a1  
d1x1ra1 d2bcgy\_ d3doea1 d3cona\_ d3rega\_ d3wyga\_ d2b6ha1 d1zd9a1  
d1r5ba3 d2f91a1 d2rhda\_ d3q3jb\_ d3q85a\_ d1efma1 d2gf9a1 d2akab1  
d1z08a1 d2gcoa1 d2dy1a2 d4g01b\_ d2cxxa1 d1svia\_ d3q72a\_ d4ac9a4  
d2erxa1 d2bmea\_ d1wxqa1 d2gf0a1 d4ldja1 d1zunb3 d41v5b\_ d2g6ba1  
d3lrpa\_ d2y8ea\_ d4rd4a1 d1z06a1 d2heia\_ d3a58b\_ d1u01a2 d1zj6a1  
d2ocba\_ d3rwoa\_ d2e9sa1 d4u5xa1 d2iwra\_ d2fn4a1 d3bwdd\_ d2nzja1  
d2atva1 d2ksqa\_ d3l43a\_ d1wmsa\_ d2rmka\_ d2fh5b1 d2wblc\_ d1wf3a1  
d1t9ha2 d1z6xa1 d1z0aa1 d2fg5a1 d2a5ja1 d2bcjq2 d4y0va\_ d4lhwa\_  
d2qmea1 d2atxa1 d2erya1 d3bfka\_ d3j3az1 d3t5ga\_ d1shza2 d3defa\_  
d2f7sa1 d3tsoa\_ d3aq4a\_ d2a17a1 d3sfva1 d3bcla\_

**Negative dataset contains 3746 protein sequences.**

d1m32a\_ d1libja\_ d1c7na\_ d1iuga\_ d4q75a\_ d2bkwa1 d1t3ia\_ d1n8pa\_  
d1qz9a\_ d1jff9a\_ d1p3wa\_ d3kgwa\_ d1cl1a\_ d2ctza1 d1vjoa\_ d2rfva\_  
d1gc0a\_ d1cs1a\_ d1d2fa\_ d2ch1a1 d1qgna\_ d1pffa\_ d1elua\_ d1c7ga\_  
d2v1pa1 d2ez1a\_ d1u08a\_ d1l1c5a\_ d1b5pa\_ d2ay1a\_ d1bw0a\_ d3pd6a\_  
d7aata\_ d2csta\_ d1j32a\_ d1fg7a\_ d4wlha\_ d1o4sa\_ d1v2da\_ d1gdea\_  
d1m6sa\_ d1v72a1 d1svva\_ d1ajsa\_ d1wsta1 d2f8ja2 d1lk9a\_ d1vp4a1  
d1xi9a1 d2gb3a1 d1xkla\_ d2wfla\_ d3i2ka1 d1lnsa3 d1mpxa2 d1i26a\_  
d1wioa4 d1ccza2 d1dr9a2 d1ic1a1 d2d9qb1 d2nxyb2 d1ddla\_ d1auyb\_  
d1rmka\_ d1ixta\_ d1eyoa\_ d1cnna\_ d1fu3a\_ d1g1pa\_ d1f3ka\_ d1fyga\_  
d3ehbb1 d1fftb1 d1hfua2 d1kbva1 d1kbva2 d1sdda1 d1sdda2 d1gyca1  
d1gyca2 d1mzya1 d2bw4a1 d1aoza1 d1aoza3 d1aoza2 d1kyaa2 d1kyaa3  
d1kyaa1 d1mzya2 d4e9sa1 d1sddb1 d1sddb2 d1hfua1 d1hfua3 d1oe1a2  
d1oe1a1 d1v10a2 d1v10a3 d1v10a1 d1novc\_ d2bbvc\_ d2cfba1 d1dfoa\_

d1o69a\_ d1bj4a\_ d3k28a\_ d2bwpa\_ d3lg0a\_ d2fnua\_ d3ou5a\_ d1z7da1  
d1b9ha\_ d1iaya\_ d4msoa\_ d1bs0a\_ d1s0aa\_ d1sffa\_ d3tqxa\_ d1mdoa\_  
d3qboa\_ d3pgya\_ d1bjna\_ d2dkja\_ d1ejia\_ d1vefa1 d4wxga\_ d3bs8a\_  
d3gbxa1 d1w23a\_ d3sxwa1 d1j3qa\_ d4luka\_ d1a3qa1 d1iknc\_ d3brda1  
d1p7h11 d1oy3c\_ d1gjia1 d1zk9a1 d2cxka1 d2bema\_ d1pama1 d1ea9c1  
d1qhoa1 d2fhfa2 d2fhfa1 d1k3ia1 d1j0ha1 d1csla1 d2bhua1 d1edqa1  
d1f1sa2 d1ut9a2 d1gvia1 d1txka1 d4alac\_ d1pjwa\_ d1rera1 d1s6na\_  
d3uzqb\_ d2phla2 d2phla1 d1fxza1 d1lrha\_ d1uija1 g1dgw.1 d2v09a\_  
d1uika2 d1uika1 d1dgwa\_ d1ep0a\_ d2pa7a1 d1wlta1 d1nxma\_ d2c0za1  
d1tafa\_ d1bh9b\_ d1tafb\_ d1jfib\_ d1h3ob\_ d2byka1 d1n1ja\_ d4g92b\_  
d1bh9a\_ d1jfia\_ d1h3oa\_ d2bykb1 d1n1jb\_ d2bjca1 d2hsga1 d1qpza1  
d1efaa1 d1k9ua\_ d2opoa\_ d1r0ka3 d1j5pa3 d1vkoa2 d1vm6a2 d3qvs2  
d1gr0a2 d1p1ja2 d2ovga\_ d1sq8a\_ d1rzsa\_ d3kz3a\_ d3orca\_ d3gpdg2  
d2q49a2 d1hdgo2 d2g17a2 d2cvoa2 d2czca1 d3pwka2 d1obfo2 d1i32a2  
d1zyao2 d2pkqo2 d1b7go2 d2hjsa2 d1cf2o2 d1vkna2 d1nvmb2 d1ux8a\_  
d4i0va\_ d2bkma\_ d1dlwa\_ d2bmma\_ d2msya\_ d2djoa1 d2r5za\_ d1au7a1  
d1f43a\_ d2lmda1 d1akhb\_ d1s7ea1 d3nara\_ d1zq3p1 d2craa1 d1mija\_  
d4uuta\_ d3a01a\_ d1x58a1 d3rkqa1 d3cmya1 d2cqa1 d2da6a1 d1e3oc1  
d1fjla\_ d1mh3a1 d1ig7a\_ d1x41a1 d1wh7a1 d1gt0c1 d2mw8a\_ d1lfup\_  
d1x2ma1 d1b72a\_ d1wi3a1 d1jgga\_ d1wjha1 d1x2na1 d1mnmc\_ d2cuea1  
d3k2aa\_ d2hosa\_ d2jwta2 d1pufa\_ d1octc1 d2hi3a\_ d1b8ia\_ d4j19a\_  
d3lnqa\_ d1wh5a1 d1b8ib\_ d1fexa\_ d2cqra1 d1guua\_ d1ug2a1 d2cqqa1  
d2ajea1 d4a69c\_ d1h8ac1 d2crga1 d2iw5b1 d1xc5a1 d1ofcx1 d2cu7a1  
d1wgxa1 d2cjja1 d2ckxa1 d1gvda\_ d1hcra\_ d1tc3c\_ d1gdta1 d1u78a2  
d2w0pa\_ d2diaa1 d2e9ia2 d2e9ja1 d2dj4a1 d2eeba1 d2diba1 d2dmba1  
d2dmca1 d2d7oa1 d2ee6a1 d2d7pa1 d2eeaa1 d2di8a1 d1wlha1 d2d7na1  
d2nqca\_ d2d7ma1 d2dica1 d3cnka\_ d2k3ta1 d2eeca1 d1qfha1 d2bp3a1  
d1v05a\_ d2ee9a1 d2eeda1 d2di9a1 d1xg1a1 d1itya\_ d1igna2 d1kv9a1  
d1k8ka2 d1k8ka1 d3uleb1 d3i33a2 d3i33a1 d1bupa1 d1dkgd2 d1dkgd1  
d4ci6a2 d1jcfa1 d4a2ba2 d2fxua1 d1yaga2 d1yaga1 d4cbua2 d1bupa2  
d1iqca2 d1eb7a2 d1eb7a1 d1nmla2 d1nmla1 d1nira1 d1qksa1 d3h1jd1  
d1hroa\_ d4gedb\_ d3zooa\_ d1mz4a\_ d1gu2a\_ d1f1fa\_ d1dvva\_ d1c6ra\_  
d1c75a\_ d1e29a\_ d1gdva\_ d1cnoa\_ d1h32b\_ d1co6a\_ d2bh4x\_ d2aiua\_  
d5cytr\_ d1jdl1a\_ d1i8oa\_ d2zboa\_ d3dmia\_ d1ls9a\_ d1wvec\_ d2yk3a\_  
d3ph2b\_ d1dw0a\_ d5aura\_ d1ql3a\_ d1qn2a\_ d1f1ca\_ d2nqya\_ d1h4ga\_  
d1hixa\_ d1oa2a\_ d1olra\_ d3b7ma\_ d4h7ma1 d3wp3a\_ d2vgda\_ d1igoa\_  
d3zsea\_ d2nlra\_ d3wx5a\_ d1oa3a\_ d1pvxa\_ d1m4wa\_ d1f5ja\_ d1oa4a\_  
d1ks5a\_ d4ix1a1 d2a6za1 d3a4ua\_ d2a6va1 d1evsa\_ d1cnt1\_ d1pvhb\_  
d1z7ca\_ d1huwa\_ d1bgea\_ d1rhga\_ d1f6fa\_ d1f45b\_ d1i1rb\_ d1axia\_  
d1letea\_ d3tgxb\_ d2z3qa1 d3qb1a\_ d1hula\_ d1m48a\_ d4nkqb\_ d1eera\_  
d1v7mv\_ d5e4ea\_ d2o27a\_ d3b5ka\_ d2psma1 d4zf7a\_ d3uf5a\_ d4x51a\_  
d1d9ca\_ d4yppc1 d3oq3a\_ d1lqsl\_ d1n1fa\_ d1au1a\_ d1wu3i\_ d3bes1\_  
d3ux9a\_ d3rbaa\_ d2qtra\_ d1nupa\_ d3l92a\_ d1f9aa\_ d2h29a\_ d1vlha\_  
d1od6a\_ d1lw7a1 d1mrza2 d4ruka\_ d3wdpp1 d3wq5a\_ d1gnxa\_ d4gxpa\_

d4hz8a\_ d1e4mm\_ d3aiua\_ d1wcca1 d1qvba\_ d3ahxa\_ d1v02a\_ d2dgaa\_  
d1pbga\_ d1vffa1 d1qoxa\_ d4ha4a\_ d2el7a\_ d1iq0a2 d1irxa2 d1r6ta2  
d1ivsa4 d2cyba\_ d1rqga2 d1j09a2 d2yxna\_ d1f7ua2 d1h3fa1 d1ffya3  
d2g36a1 d1nzja\_ d1jila\_ d1n3la\_ d1i6la\_ d1pfva2 d1h3na3 d3n9ia\_  
d3sz3a1 d1xd3a\_ d3ifwa\_ d3sw2a\_ d1moxc\_ d1dx5i3 d1edmb\_ d1autl2  
d1autl1 d1nqlb\_ d1dval1 d1szba2 d1kigl\_ d2y5f1\_ d1ijqa2 d1gk5a\_  
d1g1sa2 d1nt0a3 d1xdtr\_ d1lmja2 d1lmja1 d1nzia2 d2wphe\_ d1klil\_  
d1pfxl2 d1pfxl1 d1p9ja\_ d1g1ta2 d1f7ea\_ d4yzub\_ d1gl4a2 d1f56a\_  
d1bypa\_ d1azca\_ d1ws8a\_ d3u25a\_ d1cuoa\_ d1id2a\_ d1rkra\_ d2iaac\_  
d4dp1x\_ d1nwpa\_ d2gima\_ d2i7sa\_ d1qhqa\_ d1qx2a\_ d2y5ia\_ d1psra\_  
d3n22a\_ d2egda\_ d4ggfc\_ d2wcea\_ d2luca\_ d4aqia\_ d3nsia\_ d2lp3a\_  
d1j55a\_ d1a4pa\_ d1k8ua\_ d1nsha\_ d1pvaa\_ d3fs7a\_ d2pvba\_ d1ttxa\_  
d1rwy\_ d2kyfa\_ d1rk9a\_ d1a75a\_ d1exra\_ d1tiza1 d1nyaa\_ d1g8ia\_  
d1ggwa\_ d1wdcc\_ d3fwba\_ d1ggza\_ d2o5ga\_ d1ctaa\_ d1m45a\_ d3i5gc\_  
d1sl8a\_ d1fpwa\_ d2scpa\_ d2roaa\_ d4aqra\_ d3pn7b\_ d1br1b\_ d2mysb\_  
d1s6ca\_ d1bjfa\_ d2obha\_ d1jfka\_ d1jf0a\_ d1qv0a\_ d1lkja\_ d2mlfc\_  
d2m97a\_ d2d8na\_ d4by5a\_ d1jbaa\_ d4nqga\_ d1wdcb\_ d2mysc\_ d1j7qa\_  
d1s6ia\_ d1uhka2 d1r2ua\_ d1dtla\_ d3kf9a\_ d3pn7c\_ d1qjta\_ d1c07a\_  
d1ylxa\_ d1hqva\_ d1dvia\_ d1df0a1 d1qxp2 d4usla\_ d1k94a\_ d1wkya2  
d1uuqa\_ d3wh9a\_ d4m1ra\_ d1xyza\_ d4xuya\_ d2je8a5 d4bf7a1 d3cuia\_  
d1ur4a\_ d1qw9a2 d1odza\_ d2vzsa5 d1bqca\_ d2x2ya1 d1hjqa\_ d1qnra\_  
d4y7ea1 d1vjza\_ d4k68a\_ d2v3ga\_ d4hpga\_ d1nofa2 d1nq6a\_ d1h4pa\_  
d1aq0a\_ d3ziza\_ d4bs0a\_ d1ecea\_ d1h1na\_ d1ta3b\_ d1w91a2 d1i1wa\_  
d1uhva2 d1us3a2 d1legza\_ d7a3ha\_ d1tvna1 d3nyda1 d1ghsa\_ d2cyga1  
d4xv0a\_ d2c8na2 d1w32a\_ d3emca\_ d1v6ya1 d1foba\_ d2uwfa1 d2fgla\_  
d3niya1 d2c0ha1 d1rh9a1 d1yq2a5 d1szna2 d1fa2a\_ d1pama4 d5do8a1  
d1ea9c3 d2fhfa5 d1qhoa4 d1avaa2 d1m53a2 d4m8ua1 d2gjpa2 d1lwha2  
d4howa1 d1ktba2 d1j0ha3 d3vm5a1 d2x1ia\_ d1wzaa2 d1uasa2 d2diea1  
d1mxga2 d1ht6a2 d1eswa\_ d1iv8a2 d5cpsa\_ d1ud2a2 d1zjaa1 d3gbea1  
d1kwga2 d1wdpa\_ d1gcya2 d1g5aa2 d1hvxa2 d3dhpa2 d2bhua3 d4do4a1  
d3qgva1 d1e43a2 d1g94a2 d2d3na2 d1gjwa2 d1gvia3 d1x1na1 d1r7aa2  
d1tz7a1 d4toqa\_ d1wb0a1 d1w9pa1 d1eoka\_ d1itxa1 d1kfwal d1goia2  
d1ledqa2 d2gsja\_ d1hjxa1 d1jnda1 d1vf8a1 d1etob\_ d1g2ha\_ d1t77a2  
d1mixa2 d1e5wa2 d1isna2 d2a16b2 d1id1a\_ d2hmta\_ d1iuka\_ d2csua1  
d3q9ub\_ d2yv1a1 d3q9na\_ d2d59a\_ d2yv2a1 d1euca1 d1y81a1 d3nvva1  
d1krha3 d2h88b1 d1n62a2 d1t3qa2 d1kf6b2 d1zoyb1 d1jq4a\_ d1dgja2  
d1rm6c2 d91dta1 d2ewda3 d1up7a1 d2dfda1 d1s6ya1 d1vjta1 d7mdha1  
d1hyea1 d1t2da1 d1ojsa3 d1b8pa1 d1ldna1 d1hyha1 d1civa1 d2a92a1  
d1ez4a1 d1i0za1 d1y6ja1 d1gv0a1 d1ur5a1 d1llda1 d1lobba1 d1v8ba1  
d1gdha1 d1l7da1 d2dlda1 d1mx3a1 d1ygya1 d1li4a1 d1j4aa1 d2naca1  
d1npya1 d3t4ea2 d1a4ia1 d1o0sa1 d2hk9a2 d2egga2 d1b26a1 d1bvua1  
d1gq2a1 d1clda1 d1gtma1 d1euza1 d1nvtal d3dona2 d1edza1 d1gpja2  
d1vi2a1 d1p77a1 d1nyta1 d1b0aa1 d1vl6a1 d1v9la1 d1txga2 d3f47a1  
d1mv8a2 d2pv7a2 d1xc2a3 d2ahra2 d4xiya1 d2f1ka2 d1i36a2 d1np3a2

d1lj8a4 d1teaa3 d1qmg2 d2i76a2 d2g5ca2 d1wdka3 d1dlja2 d3cuma3  
d1kola2 d1f8fa2 d1qora2 d1jqba2 d1vj0a2 d1cdoa2 d1gu7a2 d1d1ta2  
d1xa0a2 d2dm6a2 d1jvba2 d1rjwa2 d1llua2 d1h2ba2 d1tt7a2 d1piwa2  
d1o89a2 d1liz0a2 d1e3ja2 d1yb5a2 d1uufa2 d1vj1a2 d1e3ia2 d3gpdg1  
d1vc2a1 d2nvwa1 d1u8fo1 d1ydwa1 d1hdgo1 d2g17a1 d1cf2o1 d2czca2  
d1r0ka2 d1obfo1 d2cvoa1 d1ebfa1 d1h6da1 d1i32a1 d1zh8a1 d2q49a1  
d1qkia1 d1j5pa4 d3pzra1 d1xeaa1 d1vkoa1 d1vm6a3 d3qvsa1 d2pkqo1  
d1b7go1 d1gr0a1 d1p1ja1 d1lc0a1 d1j0xo1 d3pwka1 d2hjsa1 d1zyao1  
d1vkna1 d1tlta1 d1nvmb1 d3sjua\_ d3ojfa1 d1xu9a1 d2jjya1 d1n7ha\_  
d1y1pa1 d1h5qa\_ d1jtva\_ d4fs3a\_ d2bkaa1 d1gy8a\_ d2c5aa1 d1ulsa\_  
d1ooea\_ d2b69a1 d1y5ma1 d1spxa\_ d1ae1a\_ d1bxka\_ d1ydea1 d1gega\_  
d1hdoa\_ d1o5ia\_ d1e6ua\_ d1snya1 d2rhca\_ d3zv4a\_ d5ceja\_ d2d1ya1  
d1fjha\_ d3w8ea\_ d2fmua1 d1x1ta\_ d1rpna\_ d3ay7a1 d1k2wa\_ d1eq2a\_  
d2hrba1 d3ruaa\_ d2ew8a1 d4hwka\_ d1xgka\_ d2bd0a1 d1yo6a1 d2a35a1  
d2ntva\_ d1vl8a\_ d1hdca\_ d4bkua\_ d2ag5a1 d2q45a\_ d1nffa\_ d4iy1a\_  
d1zbqa1 d1kewa\_ d1ja9a\_ d2q46a2 d1iy8a\_ d1cyda\_ d2ptga\_ d1hxha\_  
d1uzma1 d3lyla\_ d4m89a\_ d3weya\_ d2b1la1 d1w6ua\_ d1sb8a\_ d2q2va\_  
d4nr0a\_ d1e6wa\_ d2gasa\_ d3oigal d2bgka1 d1mxha\_ d1vl0a1 d1rkxa\_  
d1r6da\_ d1wmaa1 d1e7wa\_ d2c07a1 d1xkqa\_ d3tzha\_ d1g0oa\_ d3lz6a\_  
d1qyca\_ d1edoa\_ d1gz6a\_ d1oc2a\_ d1t2aa\_ d1zema1 d2xoxa\_ d1z45a2  
d1geea\_ d1p33a\_ d3lt0a\_ d4e6pa\_ d2wyua\_ d1db3a\_ d4q9na\_ d1xhla\_  
d4o1ma\_ d1fmca\_ d2uvda\_ d2gdza1 d1uaya\_ d2z1ma\_ d2o23a2 d2fr1a2  
d2fr1a1 d1qsga\_ d1qyda\_ d4zjua\_ d2a4ka1 d1yb1a\_ d1wvga1 d1yxma1  
d3f4ba\_ d1mg5a\_ d1xg5a1 d4ekfa\_ d2ckga\_ d1th0a\_ d2bkra\_ d4c5pa\_  
d2bsza1 d4bgfa\_ d1w4ta1 d3ulra1 d1kapp2 d1k7ia2 d1t3ca\_ d1epwa3  
d2a97a\_ d3fiea\_ d3ioqa\_ d1fh0a\_ d1o0ea\_ d1khqa\_ d2cb5a\_ d1cs8a\_  
g8pch.1 d1s4va\_ d2pnsa\_ d1vsna1 d1mira\_ d1iwda\_ d2oula\_ d7pcka\_  
d3bwka\_ d3bcna\_ d2p86a\_ d1pvja\_ d1pcia\_ d1gece\_ d1deua\_ d4bs6a\_  
d1xkga1 d1cqda\_ d1jqpa2 d2c0ya\_ d2bdza\_ d3p5ua\_ d1zoya1 d1qo8a2  
d1d4ca2 d1jnra2 d1kf6a2 d2jk6a2 d2jk6a1 d1feca1 d1feca2 d1lpfa1  
d1lpfa2 d1xhca1 d1xhca2 d1dxla2 d1dxla1 d1gera2 d1m6ia2 d1onfa1  
d1onfa2 d3lada2 d3lada1 d1w4xa1 d1w4xa2 d1gesa2 d1mo9a1 d1xdia1  
d1f12a2 d1fcda1 d1fcda2 d1h6va2 d1h6va1 d1mo9a2 d1gv4a2 d1gv4a1  
d2gv8a2 d2gv8a1 d1aoga1 d1aoga2 d1hyua1 d1ebda1 d1ebda2 d3dk9a1  
d1q1ra2 d1q1ra1 d1gesa1 d1zbfa1 d2z1ha\_ d2etja1 d3qioa1 d1j11a\_  
d2e41a\_ d1j12a\_ d2lsna1 d1lio2a\_ d1uaxa\_ d2yv0x\_ d1mu2a1 d1lekea\_  
d1i39a\_ d1pn0a1 d1reoal d1ju2a1 d2f5va1 d3c96a1 d2gmha1 d1gpea1  
d1o5wa1 d1n4wa1 d1k0ia1 d2dw4a2 d2ivda1 d1seza1 d2voua1 d1kdga1  
d1s5ja1 d2hbja2 d2igia\_ d1wlja\_ d1qhta1 d4dleal d1tgoa1 d2f96a1  
d3tr8a1 d3mxma\_ d1q8ia1 d1y97a1 d1w0ha\_ d1kfsa1 d2py5a1 d1noya\_  
d1d5aa1 d1yt3a3 d2guia\_ d3mwpal d4kbl1a\_ d2v76a\_ d1wj1a1 d1aqca\_  
d1qqga2 d1qqga1 d1ntva\_ d1n3ha\_ d4dbba\_ d3f0wa1 d1p3ra\_ d1wgua1  
d2cy4a1 d3hqca\_ d1wvha1 d1xr0b1 d4iuaa3 d4bvva\_ d5hpga\_ d3k65a\_  
d1ki0a3 d1ki0a2 d1ki0a1 d1a0ha1 d1pmla\_ d3sp8a3 d2feba1 d1wgqa1

d1v89a1 d2coda1 d1zc3b\_ d1wg7a1 d1u5ea1 d1v61a1 d2coca1 d2ys1a1  
d1v5pa1 d1ntya2 d1wjma1 d1wila1 d1u29a\_ d1xx0a1 d1unqa\_ d2zkmx3  
d1fhoa\_ d1v88a1 d2adza1 d1x1fa1 d1p6sa\_ d2coaa1 d1btka\_ d1v5ma1  
d1faoa\_ d2x18a\_ d1dyna\_ d1x1ga1 d4kaxb\_ d2j59m1 d1ki1b2 d1xcga2  
d1txda2 d1u5da1 d1dbha2 d1w1ha\_ d1upqa\_ d1v5ua1 d1foea2 d2fjla1  
d1eaza\_ d2dfka2 d2cofa1 d1kz7a2 d1jmx2 d1jmx1 d1pbya2 d1r7ha\_  
d1faaa\_ d1wika1 d1xfla\_ d1ttza1 d2f51a1 d1ti3a\_ d1nhoa\_ d1sena\_  
d2i4aa\_ d1ep7a\_ d1zmaa1 d1fo5a\_ d3lefa1 d3diea1 d2yana1 d1z6na1  
d1oaza\_ d3zywa1 d4aj8a\_ d1nm3a1 d4fiwa\_ d1wmja\_ d4hs1a1 d1iloa\_  
d1xwaa1 d1wjka1 d2vm1a\_ d1fb6a\_ d1gh2a\_ d1h75a\_ d1nw2a\_ d1kx5b\_  
d3a6na\_ d4m6ba2 d2nqbd\_ d3wkjd\_ d2yfw\_ d4h9na\_ d5bnxa\_ d1kx5c\_  
d3r45a\_ d1eqzb\_ d4jjnb\_ d1f66c\_ d1eqza\_ d4wnnb\_ d1kx5a\_ d1u35c1  
d1id3a\_ d2nqbc\_ d1kx5d\_ d1f1ea\_ d1b67a\_ d2b5ea2 d2b5ea3 d2b5ea1  
d2b5ea4 d2kp1a1 d2kp2a1 d1hyua3 d1hyua4 d1j08a1 d1j08a2 d1pd212  
d1nhya2 d2a2ra2 d1k0dd2 d1f2ea2 d1gsua2 d1f3ba2 d2fhea2 d2pvqa1  
d1tw9a2 d1oyja2 d1e6ba2 d1k0ma2 d3ik7a1 d4is0a1 d1r5aa2 d1j1va2  
d1m0ua2 d3gtub2 d1z9ha2 d1okta2 d1axda2 d2gsra2 d1tu7a2 d1k3ya2  
d1zgma1 d1b48a2 d1gnwa2 d1gwca2 d2gsta2 d1glqa2 d1oe8a2 d1v2aa2  
d1fwla2 d1duga2 d2trcp\_ d1ig8a1 d1czan2 d1czan3 d1czan1 d1ig8a2  
d1czan4 d1bg3a3 d1bg3a2 d1bg3a1 d4iilya\_ d1chka\_ d4olta\_ d1qqya\_  
d1f6ra\_ d1livma\_ d2gv0a\_ d1iiza\_ d2z2fa\_ d1j8xa\_ d1ghla\_ d1b9oa\_  
d1741a\_ d1691a\_ d2o4wa\_ d1p37a\_ d1k28a3 d1xjta1 d1jtma\_ d2f2qa\_  
d4e97a1 d3w3ea\_ d4tx7a\_ d3cqla\_ d4msta\_ d3iwra\_ d2z37a\_ d4dyga\_  
d2za0a\_ d2c21a1 d2pjsa1 d1k1la\_ d2i7ra1 d1ecsa\_ d1xqaa1 d5cj3a1  
d1jifa\_ d2p7oa\_ d1r9ca\_ d1nkia\_ d1mpya2 d1kw3b2 d1kw3b1 d4ghga1  
d1tfza1 d3isqa1 d3isqa2 d1sqia1 d1sqia2 d1lkda2 d1lkda1 d1mpya1  
d1cjxa2 d1cjxa1 d1sp9b2 d1t47a1 d1t47a2 d1flua2 d1sp8a1 d1sp8a2  
d1flua1 d2h0va\_ d1pv8a\_ d1w5qa\_ d2c1ha\_ d1ohla\_ d1qsta\_ d2beia1  
d4m3sa\_ d1u6ma1 d1yk3a1 d3dr6a\_ d1xmta\_ d1z4ea1 d2ge3a1 d1bo4a\_  
d2fiaa1 d2jdca1 d1y9wa1 d3to7a\_ d1wwza1 d2fl4a1 d2ozua1 d2b5ga\_  
d2cy2a1 d2p0wa\_ d1cm0a\_ d4pswa\_ d1yrea1 d1yr0a1 d1m4ia\_ d2gana1  
d1yvka1 d1ghea\_ d2g3aa1 d1y7ra1 d2euia1 d1q2ya\_ d2fsra1 d1xeba\_  
d2ae6a1 d1cjwa\_ d1qsma\_ d2aj6a1 d1y9ka1 d1i12a\_ d1vkca\_ d2atra1  
d1n71a\_ d2d4pa1 d2fiwa1 d2fe7a1 d1tiqa1 d2ou2a\_ d1yx0a1 d2fcka1  
d1p0ha\_ d2j8ma\_ d2pq8a\_ d1z4ra1 d1s3za1 d1ufha\_ d2hqya1 d2hqya2  
d1lrza2 d1ne9a1 d1ne9a2 d1xvqa1 d3hy2a\_ d2cvba1 d1o8xa\_ d1lu4a\_  
d1we0a1 d2bmx1 d2a4va1 d1psqa\_ d1xiya1 d1q98a\_ d1n8ja\_ d1zofa1  
d2ggta\_ d3tjja\_ d4je1a1 d1o73a\_ d3s9fa\_ d2zcta\_ d1qmva\_ d1jfua\_  
d2b1ka\_ d5dvba1 d2b5xa1 d2v2ga\_ d1st9a\_ d3tb2a\_ d4llra\_ d4fh8a1  
d1e2ya\_ d1knga\_ d2h30a\_ d1i5ga\_ d2z9sa\_ d2f8aa1 d1tp9a1 d2b7ka\_  
d1nm3a2 d3hvva\_ d2wfc1 d4kcea\_ d1xvwa1 d4gqca1 d3qpma\_ d4k1fa\_  
d1zzoa1 d1gp1a\_ d1prxa\_ d3kasa1 d3b1a3 d1cg2a1 d1yloa2 d1y7ea2  
d1y0ya3 d1lfwa1 d1vixa1 d1fnoa4 d1vhua2 d1ysja1 d1vhea2 d1z21a1  
d2fvga2 d1vgya1 d1r3na1 d2grea2 d1xmba1 g1q71.1 d1etha2 d1w52x1

d2ppla1 d1hpla2 d1lpbb2 d2oxea1 d1bu8a2 d1rp1a2 d1bnla\_ d1dy2a\_  
d2h1ia1 d2r8ba1 d3b5ea1 d3cn9a\_ d1lauoa\_ d1lgya\_ d4l3wa\_ d1llfa\_  
d1gz7a\_ d1lukca\_ d1ra6a\_ d1muka\_ d3gsza\_ d1khva\_ d1te9a\_ d2xwha\_  
d3uqsa\_ d3hkwa\_ d3n6ma\_ d2cjqa\_ d2xyma\_ d1teba\_ d1te8a\_ d1s48a\_  
d1u09a1 d4wfxa\_ d3tyqa\_ d2pgga1 d3zxha\_ d1cgla\_ d1rm8a\_ d1leaka2  
d1hy7a\_ d2jsda\_ d1cxva\_ d1hv5a\_ d1i76a\_ d1dzka\_ d4tlja\_ d2a2ua\_  
d4wfva\_ d3t1da\_ d4iaxa\_ d3zq3a\_ d2nnda\_ d1i4ua\_ d1kxoa\_ d1bbpa\_  
d1kt7a\_ d1exsa\_ d3s26a1 d1lf7a\_ d1qfta\_ d4gh7a\_ d1z24a1 d1qabe\_  
d1xkia\_ d1ew3a\_ d3bx7a\_ d4iawa1 d1n0sa\_ d1gkab\_ d3kzaa\_ d2k23a\_  
d2l9ca1 d2joza1 d1gm6a\_ d3kffa\_ d3saoa1 d1e5pa\_ d1yupa1 d1iiua\_  
d1jgta2 d1ea0a3 d1ecfa2 d1q15a2 d1ct9a2 d1ao0a2 d1te5a\_ d2tbvc\_  
d1c8nc\_ d1x36a\_ d1smvc\_ d1ng0c\_ d1lopa\_ d1f2nc\_ d1cixa\_ d1y29a\_  
d1v7fa\_ d2jtba\_ d1d1ha\_ d1g9pa\_ d1lupa\_ d1qk7a\_ d1mb6a\_ d2a2va\_  
d1niya\_ d1i25a\_ d1hvwa\_ d2mpqa\_ d1ie6a\_ d1kqha\_ d1la4a\_ d2mxoa1  
d1d10a\_ d1koza\_ d1qk6a\_ d1emxa\_ d1lqra\_ d1c6wa\_ d1js9c\_ d1f15b\_  
d1za7a\_ d1laja\_ d1rypd\_ d1irua\_ d1rypc\_ d3unfk\_ d1rypa\_ d1j2pa\_  
d1irui\_ d1j2qh\_ d3unfh\_ d1m4ya\_ d1rypb\_ d1irul\_ d1irug\_ d1iru2\_  
d1q5rh\_ d1rypg\_ d1g3ka\_ d1iruf\_ d1q5qa\_ d1e94a\_ d1irub\_ d1ryph\_  
d3ty6a\_ d1iruj\_ d1iruk\_ d1rype\_ d1irud\_ d1irue\_ d3mi01\_ d1rypf\_  
d1iruh\_ d2z3ba\_ d1iruc\_ d3mka2\_ d1iru1\_ d1e88a1 d1l6ja5 d1l6ja4  
d1leaka3 d1l6ja3 d1h8pa2 d1h8pa1 d1ny721 d1ny722 d1a6ca3 d1a6ca2  
d1a6ca1 d1pgl22 d1pgl21 d1ny711 d1mqta\_ d1d4m3\_ d1fmd3\_ d2mev1\_  
g1aym.1 d1ev13\_ d4q4w1\_ d1r1a3\_ d2x5ia\_ d1rhi1\_ g1r1a.1 g1d4m.1  
g1rhi.1 d1b35b\_ d1loopa\_ d1tme1\_ d4iv1a\_ g1pvc.1 g1fpn.1 d1fpn1\_  
d4gb31\_ d1d4m1\_ d1fmd1\_ d1ev11\_ d2wzr3\_ g1cov.1 d1qqp3\_ g1fmd.1  
d2x5ic\_ d1rhi3\_ g1oop.1 d1hxs1\_ g1hxs.1 d1fpn3\_ d1bev1\_ g2mev.1  
d1eah3\_ d1aym1\_ d1qqp1\_ d1zba3\_ d1h8ta\_ d3vbhc\_ g1b35.1 g1bev.1  
d1hxs3\_ g1ev1.1 d1bev3\_ g1tmf.1 d1tmf1\_ d1b35a\_ d2mev3\_ g1eah.1  
g1h8t.1 d1eah1\_ d4q4w3\_ d1r1a1\_ d1aym3\_ d1pvc1\_ d1zba1\_ d1h8tc\_  
d1loopc\_ d1tme3\_ g1qqp.1 d4iv1c\_ g1tme.1 d1y14b1 d2nn6i1 d1i941\_  
d2zjra2 d1smxa\_ d2qamc2 d1hh2p1 d2r7da1 d1rl2a2 d1wfqa1 d3bzka4  
d1x6oa2 d3a0ja\_ d2j01d2 d2ja9a1 d4q15a\_ d1hr0w\_ d1luza\_ d2n3sa\_  
d2vnud1 d1h95a\_ d1go3e1 d2nn6h1 d1ne3a\_ d2mola\_ d1iz6a2 d1jjga\_  
d1e3pa2 d2ix0a3 d2ix0a2 d2lxja\_ d1ueba3 d1ueba2 d2z0sa1 d1u0la1  
d2ix0a1 d2eifa2 d2je6i1 d3i2za1 d2c35b1 d2ahob2 d1t9ha1 d3i4oa\_  
d2qall1 d1jt8a\_ d2nn6g1 d1g6pa\_ d3cama\_ d1i94q\_ d1c9oa\_ d1d7qa\_  
d2ba0a1 d2vnud2 d2vnud3 d1khia2 d2qalq1 d1wi5a1 d1xtda2 d1ny4a\_  
d4w9ta\_ d1jvna1 d4x2ra1 d1ka9f\_ d1qo2a\_ d4axka1 d1h5ya\_ d4u28a\_  
d2y88a\_ d4wd0a\_ d1vzwa1 d3ia2a\_ d4dgqa1 d1hkha\_ d1zoia\_ d2flia1  
d1rpxa\_ d1tqja\_ d1tqxa\_ d4lt9a1 d3tc7a1 d3hoja\_ d1i4na\_ d3vnda\_  
d3n18a1 d1geqa\_ d3naval d1v5xa\_ d4a2ra1 d3tc6a1 d1ujpa\_ d4ijba\_  
d1xcfa\_ d1vc4a\_ d1rd5a\_ d1qopa\_ d3b5va\_ d2r80b\_ d1cqxa1 d1cg5a\_  
d1gcvb\_ d3boma\_ d2h8fb\_ d2raoa\_ d3bj1a\_ d4hrrb\_ d2r50a\_ d3d1kb\_  
d2aalb1 d3zhwa\_ d3hf4b\_ d3gdja\_ d1jebb\_ d3bj1b\_ d1x9fb\_ d1wmub\_

d1gcva\_ d3bcqb\_ d3d4xb\_ d1gvha1 d2dc3a\_ d3hf4a\_ d4yu3a\_ d3k8ba\_  
d1qpwb\_ d2r80a\_ d3bcqa\_ d1v4wa\_ d3wtgb\_ d1jl7a\_ d4esaa\_ d1a9we\_  
d3d1ab\_ d1fsla\_ d4h2la\_ d1v4wb\_ d1mwca\_ d1vhba\_ d1jeba\_ d1spgb\_  
d1h97a\_ d1q1fa\_ d1tu9a1 d3d1aa\_ d1hdsb\_ d3hyub\_ d2zfbb\_ d3fs4a\_  
d1oj6a\_ d1shrb\_ d4h2lb\_ d4yu3b\_ d1spga\_ d3hrwa\_ d3qqra\_ d3at5a\_  
d4wchd\_ d3hyua\_ d1cg5b\_ d1uc3a\_ d1hbra\_ d2raob\_ d1outb\_ d4esab\_  
d3gdjb\_ d3qqqa\_ d1x9fc\_ d3vrfa\_ d1litha\_ d3mkba\_ d3d4xa\_ d3mjpa\_  
d1jl6a\_ d3fh9a\_ d1outa\_ d2dc3b\_ d1lit2a\_ d3eoka\_ d3g46a\_ d1qpwa\_  
d3vrfb\_ d1x9fd\_ d1hdsa\_ d2zfba\_ d3mkbb\_ d1or4a\_ d3wtga\_ d1a4fa\_  
d3fh9b\_ d3bomb\_ d3cy5a\_ d3at5b\_ d1x9fa\_ d2oifa\_ d4lmbx\_ d1cpcb\_  
d3v57a\_ d1kn1a\_ d1cpca\_ d4f0ta\_ d2vjha\_ d4po5b\_ d1eyxa\_ d1alla\_  
d4f0tb\_ d1b33b\_ d1b8db\_ d4h0mb\_ d1b33a\_ d2vjhb\_ d4lm6b\_ d2vmlb\_  
d1allb\_ d2vjta\_ d3dbja\_ d2vmla\_ d2vjtb\_ d4f0ub\_ d1f99b\_ d4rmpa1  
d1liaa\_ d1eyxb\_ d2uulb\_ d4lmsb\_ d4f0ua\_ d2bv8a\_ d1f99a\_ d2bv8b\_  
d2c7lb\_ d3dbjb\_ d4rmpb1 d1b8da\_ d4h0ma\_ d3v57b\_ d1liab\_ d2uula\_  
d2j96a\_ d3nqyb\_ d4gera\_ d1bqba\_ d2xqfa\_ d1ea5a\_ d1f6wa\_ d1dx4a\_  
d1qe3a\_ d1k4ya\_ d4qwwa\_ d2ha2a\_ d1r88a\_ d1sfra\_ d1f0na\_ d4qeka\_  
d3c8da2 d2pbla1 d1jkma\_ d1jjia\_ d1jjfa\_ d2qvba\_ d2v9za\_ d4kafal  
d2m5ta\_ d1wqsa\_ d5bpea\_ d2ipha\_ d1lvoa\_ d2bhga1 d3tnta\_ d3sjia\_  
d3d23a1 d2fyqa\_ d3tloa\_ d3zvea1 d2hrva\_ d3q3ya1 d4asha1 d1jmx4  
d1jmx3 d1pbya4 d1b9ra\_ d1offa\_ d1frra\_ d3wcqa\_ d1e9ma\_ d1l5pa\_  
d1wria\_ d1i7ha\_ d3av8a\_ d1czpa\_ d1rfka\_ d3plma1 d3b2ga\_ d2bt6a2  
d1xm5a\_ d1xaxa\_ d1tvia\_ d1s5ja2 d1qhta2 d4dlea2 d1tgoa2 d3py8a2  
d1q8ia2 d1kfsa2 d2py5a2 d1d5aa2 d1f74a\_ d3l21a\_ d2e1da\_ d1to3a1  
d1w3ia\_ d1sfla\_ d1n7ka\_ d1vcva1 d4imea\_ d1wa3a\_ d2ocza1 d1f2ja\_  
d3m16a\_ d2yxga\_ d1ub3a\_ d3a5fa\_ d1fbaa\_ d1l6wa\_ d1xfba1 d1wx0a1  
d1vpxa1 d1mxsa\_ d2a4aa1 d1xkya1 d3cq0a1 d3s1xa\_ d1f05a\_ d1fdja\_  
d3cpra1 d4d2ja\_ d4mh8a\_ d1mu2a2 d4i7ga1 d3rp2a\_ glucy.1 d1fuja\_  
d2zchp\_ d3w94a\_ d1si5h\_ d1lo6a\_ g2pka.1 d1cgha\_ d1kigh\_ d1a5ia\_  
d3s9ba\_ d1hj8a\_ d1ao5a\_ d2anya\_ d1q3xa1 d1gvza\_ d1azza\_ d4gsoa\_  
d2f91a1 d1iaua\_ d1gdna\_ d1eufa\_ g1fiw.1 d1eq9a\_ d4nfea\_ d2rdla\_  
d1spja\_ d1elva1 d1a7sa\_ d1ekbb\_ d1pfxc\_ d1yc0a\_ d2aiqa\_ g1fiz.1  
d1fi8a\_ d4k60a\_ d4dgja\_ d1mzaa\_ d1op0a\_ d3tjva\_ d1pytd\_ d1sgfg\_  
g1gg6.1 d2eeka\_ g1rtf.1 d3g01a\_ d1pytc\_ d4e7na\_ d1ddja\_ d1z8ga1  
d2hlca\_ d1npma\_ d1brup\_ g1jou.1 d1sgfa\_ d1autc\_ g2hnt.1 g1kdq.1  
d1orfa\_ d3s69a\_ d4crga\_ d1fxya\_ d1bqya\_ d2ftba\_ d1pmpa\_ d2rcqa1  
d1fdqa\_ d4lkpa\_ d1sa8a\_ d1vyfa\_ d1lpja\_ d3vg7a1 d4azqa1 d5bvqa\_  
d1p6pa\_ d2qo4a\_ d1opba\_ d1yiva1 d1o1va\_ d4bvma1 d4tkba\_ d4i3ba\_  
d1bwya\_ d1ftpa\_ d1ggla\_ d4gkca\_ d1cbia\_ d3p6da1 d1kqwa\_ d2a0aa1  
d1m4la\_ d2bk7a\_ d3fjua\_ d1z5ra1 d1kwma1 d1uwya2 d1jqga1 d2c1ca1  
d1dtda\_ d3lgia\_ d3i77a\_ d2z9ia2 d4nsva\_ d1lcya2 d4jcna\_ d1agja\_  
d1os8a\_ d1hpga\_ d1p3ca\_ d1l1ja\_ d1qtfa\_ d2i49a\_ d1nnfa\_ d1xvxa\_  
d1ursa\_ d1h3da1 d1iuda\_ d4m1va1 d1twya\_ d3e13x\_ d2nxoa1 d4pfua\_  
d3ttma\_ d1elja\_ d2qmwa1 d1us5a\_ d1y3na1 d1jeta\_ d1uqwa\_ d4f19a1

d2esna2 d3thia\_ d3fasa1 d2uyeb\_ d2xwva1 d1r9la\_ d2fyia1 d1pb7a\_  
d2ozza1 d1sw5a\_ d1nh8a1 d1vr5a1 d2g29a\_ d1xs5a\_ d3lswa\_ d2z23a\_  
d3w9va\_ d3tcha\_ d1q35a\_ d1z7me1 d3q27a\_ d1p99a\_ d1ve4a1 d2i6ea1  
d4mcoa1 d4n8ya\_ d1eu8a\_ d1zbma1 d1lixca2 d1j1na\_ d1xvya\_ d1y9ua\_  
d2z22a1 d1xoca1 d4oera\_ d1wdna\_ d5f1qa1 d1xt8a1 d1i6aa\_ d4gwoa\_  
d4igta1 d1pc3a\_ d4mmpa1 d1o63a\_ d2czla1 d2onsa2 d4mija1 d1eh3a\_  
d3skpa\_ d1dtza1 d1dtza2 d1ieja\_ d1jnfa2 d1ce2a1 d1jnfa1 d1b1xa2  
d1b1xa1 d1jw1a1 d1jw1a2 d1ryoa\_ d1h76a1 d1h76a2 d3q3ma\_ d1za0a1  
d1mxra\_ d2inca\_ d1jk0a\_ d2incb\_ d1mhyb\_ d3hf1b\_ d1mtyb\_ d1r2fa\_  
d2uw1a\_ d1mhyd\_ d3n37a\_ d1afra\_ d1oquc\_ d1syya\_ d1mtyd\_ d2o1za\_  
d1uzra\_ d1smsa\_ d2fkza\_ d1zujal d1s3qa1 d2fjca1 d1z6om1 d1veia\_  
d4dyya\_ d1jiga\_ d3gvya\_ d2pyba\_ d4cy9a1 d3bvfa1 d1r03a\_ d2cf7a\_  
d1nf4a\_ d1zs3a1 d4iwka\_ d3ka8a\_ d3np0x\_ d1n1qa\_ d1lb3a\_ d4e6ka\_  
d1z6oa1 d2fzfa1 d4dyua\_ d3ge4a\_ d1jgca\_ d4am4a\_ d2z6ma\_ d1ji5a\_  
d1vlga\_ d1lkoa1 d1krqa\_ d3qz3a\_ d1o9ra\_ d2ffxj\_ d1euma\_ d1yv1a1  
d2v2pa\_ d1j30a\_ d4di0a\_ d1dpsa\_ d1oewa\_ d2qzxa\_ d2asia\_ d1psoe\_  
d1miqa\_ d1smra\_ d2h6ta\_ d1pfza\_ d1izda\_ d3hd8a\_ d1j71a\_ d1dpja\_  
d4aa9a\_ d1t6ex\_ g1b5f.1 g1lya.1 g1htr.1 d1qdma2 d1bxoa\_ d1wkra\_  
d1tzsa\_ d1libqa\_ d2qzwa\_ d1ex4a2 d1c6va\_ d1bdqa\_ d3ggta\_ d3ixoa\_  
d1mrxa\_ d2haha\_ d1tw7a\_ d4njsa\_ d1sgua\_ d2p3da\_ d1nsoa\_ d3d3ta\_  
d2rkfa\_ d1c6ya\_ d2rspa\_ d3ogpa\_ d3ekwa\_ d2o4na\_ d2j9ja\_ d3ggua\_  
d3lzua\_ d4npua\_ d4j55a\_ d2r8na\_ d2fxda\_ d2p3ca\_ d4dgea\_ d3ttpa\_  
d3t3ca\_ d2p3aa\_ d2hc0a\_ d2fdda\_ d3mwsa\_ d3rcha\_ d3k40a\_ d1pmma\_  
d1k8rb\_ d1wgra1 d1ef5a\_ d1wfyal d1e8ya3 d1wgya1 d1l1fda\_ d2cs4a1  
d1wxma1 d2byea1 d3kh0a1 d2byfa1 d1wxaa1 d1e7ua3 d1h4ra3 d4yl8a1  
d2a16a3 d1wgda1 d1wggal d4q5eb\_ d1wjna1 d1se9a\_ d3n3kb\_ d1wz0a1  
d1we6a1 d2m0xa\_ d2gbka\_ d3rt3b1 d1wh3a1 d1sifa\_ d2ekek2 d4ii2b1  
d4hk2a1 d1c3ta\_ d1m94a\_ d1wgga1 d1ttna1 d1j8ca\_ d1wx8a1 d3v6cb1  
d2ma9b\_ d4i61b1 d1bt0a\_ d2jvca1 d1iyfa\_ d2k1fa\_ d1wxva1 d1wf9a1  
d1t0ya\_ d2io0b2 d1x1ma1 d2gbma\_ d1zw7a1 d2m17a\_ d1we7a1 d2l1wpa\_  
d2gbja\_ d1wjua1 d1v6ea1 d1v86a1 d4eewa\_ d1wiaa1 d4icva\_ d4gu2a\_  
d1wx7a1 d1wy8a1 d4hjka1 d2faza1 d1v5oa1 d3ruib\_ d1eo6a\_ d3waob\_  
d2r2qa1 d3m95a\_ d3wana\_ d2a13a1 d2cr5a1 d1wj4a1 d1s3sg\_ d3ubra\_  
d1qo8a1 d1d4ca1 d2k3va\_ d1ft5a\_ d1qdba\_ d1m1qa\_ d2j7aa\_ d1h21a\_  
d1ogyb\_ d4fasa\_ d1jnia\_ d1sp3a\_ d1yvca1 d1yeza1 d1qoza\_ d5ajha1  
d2bcgg1 d2bcgg2 g1y43.1 d2dara2 d2dara1 d1wyha2 d2dloa2 d1rutx4  
d1rutx3 d2cuqa2 d1x41a2 d1x41a1 d1x3ha2 d1x3ha1 d2d8za1 d1x61a2  
d1x6aa1 d1x6aa2 d2cora2 d2cora1 d1v6ga1 d1v6ga2 d2d8za2 d1x64a1  
d1x64a2 d1b8ta1 d2co8a1 d1x63a2 d2dj7a2 d2dj7a1 d2cu8a2 d2cu8a1  
d1g47a2 d1g47a1 d1j2oa1 d1wyha1 d2dloa1 d1wiga1 d1wiga2 d2cupa2  
d2cupa3 d1x68a1 d2d8ya2 d2d8ya1 d1m3va2 d1x62a1 d1x68a2 d1x61a1  
d1b8ta3 d1b8ta2 d2d8xa2 d2d8xa1 d1x4ka1 d1x4ka2 d2cuqa1 d1m3va1  
d2co8a2 d1j2oa2 d1x63a1 d2cura1 d2cura2 d1x62a2 d1svpa\_ d1mbma\_  
d3su6a1 d1cula1 d4agka\_ d1vcpa\_ d1q31a\_ g1n11.1 d3e90b\_ d1ep5a\_



d3u1jb\_ d2lj7a\_ d1n4na\_ d2m8bb1 d2kyqa\_ d3psma\_ d1jxca\_ d2g1la\_  
d1ugla\_ d4uj0a\_ d2k4ua\_ d1hp2a\_ d2lu9a\_ d1baha\_ d2meoa1 d1wm7a\_  
d1hlya\_ d1n8ma\_ d1jlza\_ d1wpda\_ d1c55a\_ d1pvza\_ d1wt7a\_ d1rjia\_  
d1wz5a\_ d1m2sa\_ d1pjva\_ d1c49a\_ d1qkya\_ d2ktca1 d1wmta\_ d1du9a\_  
d1j5ja\_ d1rlga\_ d1t0za\_ d2i61a\_ d1t1ta\_ d1sn4a\_ d1kv0a\_ d2lkba\_  
d1npia\_ d1wwna\_ d1pe4a\_ d2kbka\_ d2li7a\_ d2kbha\_ d1dq7a\_ d1sega\_  
d1omya\_ d1zywa1 d1jzaa\_ d1bbua1 d1e1oa1 d1c0aa1 d1b8aa1 d1l0wa1  
d3a74a1 d1eova1 d1t61c1 d1iyjb4 d1iyjb5 d1iyjb3 d1o7ia\_ d4ipca1  
d1x3ea\_ d4apva\_ d1jb7a1 d1jb7a2 d1jb7a3 d3kdfa\_ d1ue1b\_ d1wjja1  
d3eiva\_ d1xjva2 d1xjva1 d2ccza2 d1se8a\_ d1l1oc\_ d1jb7b\_ d1qvca\_  
d1qzga\_ d1miua4 d1miua5 d1miua3 d3ubub\_ d1legia\_ d1qo3c\_ d1v7pa\_  
d1tdqb\_ d3ubua\_ d1c3ab\_ d1h8ua\_ d3bx4b\_ d1t8ca1 d1sb2a1 d1qdda\_  
d2ziba1 d3cada\_ d1byfa\_ d1j34b\_ d1jwia\_ d1jzna\_ d1c3aa\_ d1oz7b\_  
d1wmza\_ d3bdwb\_ d1hq8a\_ d1fifa1 d1dv8a\_ d3hupa\_ d1wk1a1 d1umra\_  
d2afpa\_ d3bx4a\_ d1gz2a\_ d1sl6a\_ d1v7pb\_ d3g8ka\_ d1ixxa\_ d1j34a\_  
d1jwib\_ d1g1sa1 d1y17a1 d1ja3a\_ d1fvub\_ d3bdwa\_ d1sb2b1 d1fvua\_  
d1umrc\_ d1oz7a\_ d4m17a\_ d3cfwa1 d1ypqa1 d1g1ta1 d3fd4a\_ d3l9jc\_  
d4dn8a1 d1rdl1\_ d2msba\_ d1dgsa2 d1ckma1 d1p16a1 d1x9na2 d1pfsa\_  
d2a1ka\_ d2shpa1 d1yfoa\_ d1l8ka\_ d2ooqa1 d1g4us2 d1p15a\_ d1lara2  
d1lara1 d1wcha\_ d2fh7a2 d2fh7a1 d3azya\_ d3wvja\_ d1upsa1 d1ajoa\_  
d2hyka\_ d1ajka\_ d2vy0a\_ d1o4ya\_ d3o5sa\_ d3d6ea\_ d3atga\_ d1dypa\_  
d1umza\_ d3i4ia\_ d1c1la\_ d4lbqa\_ d1a78a\_ d1slta\_ d4no4a\_ d3zsja\_  
d3duia\_ d1g86a\_ d1is3a\_ d1qmja\_ d1hlca\_ d1tdha3 d1q3ba3 d1ee8a3  
d1k82a3 g1qmo.1 g1len.1 d3zyra\_ d1n47a\_ g21tn.1 d1avba\_ d3usua\_  
d1dhkb\_ d1f9ka\_ d1ukga\_ d1g8wa\_ d1g9fa\_ d1wbfa\_ d3wcsa\_ d1g7ya\_  
g1loe.1 d1mvqa\_ d1hq1a\_ d1v6ia\_ d1dbna\_ d1qnwa\_ d1fx5a\_ d4l8qa\_  
d1ioaa\_ d3n35a\_ d2h0ba\_ d2erfa\_ d1h30a1 d3mw4a1 d1pz7a\_ d2rlba\_  
d3v64a1 d1d2sa\_ d3bopa1 d3mw3a1 d1okqa1 d1okqa2 d1dszb\_ d1a6ya\_  
d3cbba\_ d1ynwa1 d1r4ia\_ d1hcqa\_ d2hana\_ d2hanb\_ d2enva1 d1kb4b\_  
d2n1lb\_ d1l01a\_ d1cita\_ d1adqa1 d1fnga1 d1uvqb1 d1zs8a1 d2vola1  
d2vola2 d1mfb12 d2jelh2 d1uwel2 d3qq4b1 d1kjvb\_ d1k5na1 d1osph2  
d4odh12 d1ow0a1 d1ow0a2 d1bfob2 d3l9ra2 d3jtth1 d2fath2 d4elkb2  
d1fn4b2 d2xfxb\_ d1pg7x2 d1cqka\_ d4k71b2 d1lk2a1 d1eapb2 d4lfhg2  
d1i4fa1 d2nw2a2 d1kfah2 d1mhca1 d1h3ua1 d1wejh2 d1h0db2 d1a5fh2  
d1kcvh2 d1mjuh2 d1qqda1 d1kcrh2 d1k8ia1 d3huja2 d2nnab1 d1nfd2  
d3mffb2 d1s9va1 d1lk3h2 d1q0x12 d1fv1b1 d1neza1 d4rfeb2 d1r3ha1  
d1a6tb2 d1kjva1 d1pz5b2 d1onqa1 d2bc4a2 d1de4a1 d1k8da1 d1tcra2  
d1dn0b2 d1nfde2 d2xwtb2 d1bfoa2 d1mexh2 d1iakb1 d1ypzf2 d4f7ea2  
d1q72l2 d2fbjh2 d1fe8h2 d1clzh2 d1fngb1 d1uvqa1 d1vgka1 d1c16a1  
d4j12a2 d4x99b2 d1igtb3 d1je6a1 d1q72h2 d1nldh2 d1teth2 d2hmic2  
d1ilca2 d1ilca1 d1k8ib1 d1q0yh2 d1kfa12 d3frua1 d1pg7w2 d1u58a1  
d1igyb4 d1igyb3 d1hyrc1 d1klub1 d1deeb2 d1c12b2 d2bc4b2 d2ig2h2  
d1kcv12 d3wn5b1 d1lk2b\_ d1lk3l2 d1mjul2 d1sm3h2 d1q0xh2 d1zvsal  
d1ydpal d1u8ib2 d1ypze2 d1kcu2 d1op9a\_ d1y01a1 d1letzb1 d1legj11

d2gsib1 d1nj9a1 d4jfhd1 d1aqkl1 d1t2ja\_ d1lo4h1 d1zvyal d3v4vl1  
d4enec1 d1kxtb\_ d5e8ea1 d2pxya\_ d4weud\_ d1xiwc\_ d2esvd1 d1qznh\_  
d1logae1 d1f4xh1 d4n1hb\_ d3ezjb1 d3mlwl1 d1kfah1 d1etza1 d1b4jh1  
d3cfic\_ d4w68a\_ d2arja1 d1ek3a\_ d2ok0l1 d1vera\_ d1uwgh1 d1blnb1  
d1fpth1 d1rzga1 d2giya1 d4m3kb1 d1nc2a1 d2nyyd1 d1ncna\_ d1fbih1  
d5dxwa\_ d4fqqa1 d1dqdh1 d1jfq11 d1kelh1 d1faih1 d1frgl1 d1figl1  
d4m6nl1 d1fo0a\_ d4hxb11 d3b5ga\_ d3quyd1 d2h9gb1 d1i8kb\_ d2dd8h1  
d2ck0h1 d1eaja\_ d4w6wb1 d2a6ib3 d1t66d1 d2e27h\_ d1ob1b1 d1f11b1  
d2v7na1 d1ad0a1 d2xt1b1 d1pskh1 d4i13b1 d2op4l1 d1a0ql1 d1uwell  
d1za3a1 d1ncb11 d4uu9a\_ d1bm3h1 d1cloh1 d1nqba2 d1cf8h1 d4y5va\_  
d1mhph1 d5anma1 d4cdgc1 d4ldeb\_ d1y01b1 d2pcpb1 d1z3gl1 d1dfb11  
d1fh5h1 d3g5xa1 d1tzib1 d4dn3l1 d3zhka1 d2b1hh1 d2uylal d1f3dh1  
d1nj9b1 d2agjh1 d2h1pl1 d1q72h1 d8fabb1 d1ndmb1 d1rjca1 d4u6hb1  
d3upca\_ d2fbj11 d1osph1 d1tvda\_ d2cjev\_ d4fhbd1 d1bd2d1 d1rz7h1  
d3nn8a\_ d1blna1 d1knoa1 d1nfda1 d2bmkb1 d1dq11\_ d1igyb1 d1igfl1  
d12e8h1 d3utza1 d1nc2b1 d1rihh1 d4mwfb1 d4jvpa1 d1mieh1 d1rhfa1  
d1fgn11 d1sbsh1 d1lp9e1 d1dn0a1 d4lqfl1 d1iaih1 d1kgcd1 d1mh5b1  
d1gpo11 d2g60h3 d1f8tl1 d2jixd1 d4grwh\_ d1fo0b\_ d1bfob1 d1axsa1  
d1u9ka\_ d1nmbh\_ d1h8na1 d1h8na2 d1jguh1 d4eural d3sdy11 d35c8h1  
d1w72l1 d1mvub\_ d1i9rh1 d1ob1a1 d4wenb\_ d1yeeh1 d3ietc1 d1f58h1  
d1ad0b1 d1mqkl\_ d1nbvh1 d4b50a\_ d3r8bb\_ d1baf11 d1mamh1 d4rgnel  
d2gsgb\_ d35c8l1 d1bafh1 d1ai1h1 d2pcpa1 d2fath1 d2x1pa\_ d1orsb1  
d1ibgl1 d1shma\_ d1a2yb\_ d1u0qa\_ d2coqa\_ d1hilb1 d1qfwi\_ d1jv5b\_  
d1fn4b1 d5e0qa\_ d1nsnh1 d1plgl1 d4ocxl1 d1kb5h1 d1rzhf1 d1pg7x1  
d2fx7h1 d2oi9c\_ d1l7il1 d3eyva1 d1d5il1 d4ffyl\_ d1tetl1 d1a6wh\_  
d1ac6a\_ d3dvfa\_ d1nfde1 d1mimh1 d1ri8a1 d1jhlh\_ d3dura\_ d1fskb1  
d1f97a1 d3so3b1 d2ak4d1 d1lp9f1 d4z7wf1 d1l7th1 d4y5ya\_ d4x7ec1  
d1emth1 d1ikfl1 d1nlbh1 d4utal1 d1bjma1 d1eapb1 d1u6ah1 d2dtgd1  
d1kj2b\_ d1xeda1 d1cleh1 d1fgvh\_ d2bnub1 d2fb4h1 d2dtgb1 d1ktrh\_  
d1jpth1 d1qkz11 d4hepg\_ d2atpb1 d1flrh1 d2hrpl1 d1mvfa\_ d1iaim1  
d3k80a1 d2jb5h1 d3zkxc\_ d4grwe\_ d1it9h1 d1rhhb1 d3w9ec\_ d1e4wh1  
d1sy6h1 d2j6eh1 d3qxta\_ d1jglh1 d1p7ka1 d1tzhb1 d4n8pa1 d1gaf11  
d2jelh1 d1wioa2 d4i0cc1 d1cicb1 d1lmka2 d1lmka1 d1iqwh1 d1lorqb1  
d1ejoh1 d1jnlh1 d4zga1\_ d43c9b\_ d1ggbl1 d1wejh1 d3q6fa1 d1f3dj1  
d3c6la1 d1bqlh1 d3p9wb\_ d1a3r11 d1h0db1 d2uzil\_ d1eo8l1 d1qfwl\_  
d1n7ml1 d1igja1 d1c5ch1 d2a9mh\_ d1rmfh1 d1fj1b1 d4heme\_ d1ccza1  
d1a5fh1 d1ogad1 d1dlfh\_ d1qa9b\_ d1vge11 d3qskb\_ d1sjxa\_ d4ozfg1  
d1sq2n\_ d1qd0a\_ d1kcvh1 d1c5db1 d3qcull1 d3bn9d1 d1mjuh1 d4y8dc\_  
d7fabh1 d3dvgb1 d1lo0l1 d1a6tb1 d1gigh1 d1kcrh1 d2hwz11 d1yjdc1  
d3clfl1 d4krna\_ d1d17l\_ d1e6o11 d1mexh1 d3r0ma\_ d4kkna\_ d1fnsl1  
d1loaqh\_ d1rzial d1lucbh1 d1ncwl1 d4b41a\_ d1nfdfl1 d2mpah1 d2d7t11  
d4grwf\_ d4b5ea\_ d1lk3h1 d3u79a\_ d4u3xa\_ d1ghfl1 d1bvkb\_ d1mcww1  
d1b88a\_ d1jrhh1 d32c2b1 d4wemb\_ d1dsfh\_ d1op3h1 d1ce1l1 d1iqda1  
d1qoka1 d1qoka2 d1qfuh1 d2crya1 d1ay1h1 d1loaql\_ d3ab0b\_ d1rur11

d1t4kb1 d1bz7b1 d1n0xh1 d1for11 d1lucb11 d4w6yb\_ d43c9a\_ d2aab11  
d1tzia1 d4n1ca\_ d1k6qh1 d3g9ab\_ d4tvsa1 d1ligmh\_ d1pz5b1 d3dx9a1  
d3wxwh\_ d1nakh1 d1kcul1 d3eaka\_ d4qlra1 d1cr911 d1d9ka\_ d1f4x11  
d1deea1 d2i27n2 d1c12a1 d2orbl1 d1j8hd1 d1mcph1 d1c5da1 d1kenh1  
d1bd2e1 d1h5ba\_ d4x7fc1 d3upaa\_ d1t3fa1 d1indh1 d2dtgc1 d4hc111  
d1zv5a1 d4wgvb\_ d1uwgl1 d4f37k1 d1aqkh1 d1vesa\_ d3zkqd\_ d1fpt11  
d1l0411 d1knob1 d3rrqa\_ d1ct8b1 d4orz\_ d1mlbb1 d4hgkc1 d1dqdl1  
d1bogb1 d4ozhe1 d1dr9a1 d1i7za1 d1dn0b1 d1kell1 d1rzi1 d1ypzf1  
d1wtla\_ d1hkfa\_ d1fail1 d1figh1 d2vyre\_ d1sjva\_ d1ohqa\_ d1bfoa1  
d1pkqb1 d1mjul1 d1b4j11 d1nsn11 d2arjb1 d1p4bh\_ d4aj0a\_ d3nn8b\_  
d2rcja1 d1f2xk\_ d4v1dd\_ d1adqh1 d2eksa\_ d4k3ga\_ d1jfqh1 d1uweh1  
d1frgh1 d4gftb\_ d1uz8b1 d4n1ea\_ d1bm311 d1cl011 d3mcka1 d2vq1a1  
d1ae6h1 d4aq1b1 d1uj3b1 d1nbqa1 d1fh511 d2ck011 d2ywza\_ d1q7211  
d4nbxb\_ d1hila1 d4hz1b1 d2j8811 d1zmya1 d1cd0a\_ d1a4ka1 d1psk11  
d1a0qh1 d4krmb\_ d1ncbh1 d2fbjh1 d1j8he1 d1i3ua\_ d1cf811 d1fe8h1  
d2plya1 d1eeqa\_ d2x89a\_ d1o10a\_ d2r01h1 d1ub5a1 d1dfbh1 d3eyvb1  
d4jdvb1 d4p2cg\_ d2gsia1 d2agj11 d1u3ha1 d2h1ph1 d1rih1 d1fskc1  
d1boga1 d2a7711 d1osp11 d1qfoa\_ d3dwta\_ d2fx711 d1rz711 d3stba1  
d1pkqa1 d1b6da1 d1dzba2 d1dzba1 d1kj2a\_ d4l1ha\_ d1rzgb1 d1dq1h\_  
d12e811 d1mie11 d1jmaa\_ d1sbs11 d1fgnh1 d1f5811 d1mqkh\_ d1ndgb1  
d3qeg11 d1ia11 d2aw2a1 d1tqbc1 d3fo2a1 d4dkaa\_ d1f8th1 d2g6011  
d2ywy\_ d1uj3a1 d1yc7a\_ d3bd3a\_ d4w6xb1 d1nmb1\_ d1i8ka\_ d1rjlb1  
d1ypze1 d1p7kb1 d1kxqe\_ d1gpoh1 d2z4qa1 d1w72h1 d1i9r11 d4qgya1  
d4xt1c\_ d2qqnh1 d1cica1 d3c08h1 d2cd0a\_ d2bdnh1 d1hnga1 d1mam11  
d1nldh1 d1cr9h1 d4lcih1 d3bkyh1 d3qg711 d1ai111 d1kxvc\_ d4iosd\_  
d117ih1 d2x1qa\_ d1ub6b1 d3k74b\_ d1libgh1 d1teth1 d1lgya1 d1hxma1  
d2x6ma\_ d2e71a\_ d5e03a\_ d1qfwm\_ d2r0kh1 d1igjb1 d1rurh1 d1plgh1  
d1mj8h1 d1yuhb1 d3fmg11 d1rzf11 d1emt11 d1ad9b1 d1lgtb1 d1nlb11  
d1d5ih1 d3k7ua\_ d4ffyh\_ d1bwva\_ d3dvga1 d1a6ta1 d1fgvl\_ d4qxgl1  
d1mim11 d1jh11\_ d2hffb1 d2hh011 d1qkzh1 d117t11 d1afvh1 d1iaii1  
d2cjuh\_ d1um5h1 d2ghwb2 d2ghwb1 d1kgce1 d2fgwh1 d1ikfh1 d1dvfd\_  
d2i24n1 d2xtjb\_ d1za3b1 d2yc1a\_ d2hh0h1 d2x1oa\_ d1bvka\_ d1rjla1  
d5e7ba1 d1igta1 d1i11b1 d2fb411 d1mvua\_ d1jpt11 d32c2a1 d1fvca\_  
d1iqdb1 d2hrph1 d2p4ab\_ d4qo1a\_ d1p2cb1 d1wt5c\_ d1t4ka1 d5c1mb\_  
d1it911 d1bz7a1 d1b2wh1 d1e4wl1 d1jnl11 d1yedb1 d1za6b1 d3u7aa\_  
d1lgh1 d3gnml1 d1orsa1 d1wejl1 d1a2ya\_ d1hxmb1 d1gafh1 d2j4wh1  
d1pz5a1 d1j05a\_ d1a3rh1 d4fq111 d1qfwh\_ d1eo8h1 d1n7mh1 d4s11a\_  
d1kegh1 d5da4a\_ d1iqw11 d3whxb1 d1vgeh1 d1deeb1 d1c12b1 d1t2q11  
d1ad9a1 d3gsnb1 d3b2uc1 d1ggbh1 d1t3fb1 d1nak11 d4ocmc\_ d1lila1  
d2v7hb3 d2esve1 d1mcoh1 d2qr0b1 d2q3aa\_ d1ct8a1 d1kcr11 d2pxyb\_  
d2uzih\_ d5c31d\_ d3durb\_ d1c5c11 d2ak4e1 d1d17h\_ d1xiwd\_ d1mlba1  
d1rmf11 d1i7zb1 d1dlf1\_ d2xa3a\_ d5bq7b1 d1dqqb1 d3h4211 d1legjh1  
d1kcv11 d1fe811 d2j6e11 d1f3rb2 d1lk311 d1sm3h1 d1q0xh1 d1ghfh1  
d7fab11 d1lgh1 d1l00h1 d4idla\_ d5c2b1\_ d1jrh11 d1lila1 d3zhda1

d4kfzc\_ d1b0wa\_ d1e6oh1 d1mexl1 d4krpb\_ d1fnsh1 d1ncwh1 d4hgma\_  
d4eigb1 d4rzca\_ d2mpal1 d4y5xa\_ d5en2b1 d3lrga1 d4ej1c1 d1rhha1  
d1j05b\_ d1forh1 d1q9wb1 d2wzpd\_ d2aq2a1 d1h0da1 d3revb1 d2ij0c1  
d1tzha1 d4m7j11 d1k6q11 d3b9kc1 d1igml\_ d3qeua1 d1dsfl\_ d1celh1  
d1kcu1 d1zvha1 d1zvoa1 d1tqbb1 d1ay111 d2qsc11 d2cgrh1 d1n10h1  
d1ken11 d3eo0a1 d4n9ob1 d1n0x11 d3k1kc\_ d2m9wa1 d3dfxa\_ d2aq2b1  
d1ck1a1 d1enfa1 d1v1oa1 d1et9a1 d1esfa1 d2g9hd1 d4ohja1 d1klud1  
d1bxta1 d1eu3a1 d1ty0a1 d1fnua1 d2cqva1 d1fhga\_ d2k1ma\_ d2d12a1  
d1biha3 d1biha1 d1biha4 d3qp3a1 d1g1ca\_ d1gxea\_ d1cvsc2 d1cvsc1  
d1xmwa2 d2otpa2 d1biha2 d1rhfa2 d2fcba2 d2fcba1 d1wwbx\_ d1gsma2  
d1lepfa1 d1lepfa2 d2dava1 d1waaa\_ d1f97a2 d1x44a1 d1vcaa2 d1fnla2  
d1fnla1 d3b5ha2 d3h8na2 d3h8na1 d1bjba1 d1bjba2 d1pd6a\_ d1f2qa2  
d1f2qa1 d3cx2a\_ d1nbqa2 d3b5ha1 d1n26a1 d1xiwb\_ d1xaua\_ d1fltx\_  
d2ifga1 d1olla1 d1olla2 d1cs6a4 d1cs6a3 d1cs6a2 d1cs6a1 d2gw5a2  
d1sy6a1 d1xiwa\_ d1ucta2 d1ucta1 d1ry7b2 d1g14b\_ d1qz1a3 d1olza1  
d2c9aa1 d1wwca\_

**Family-67 (c.37.1.9)**

**Positive dataset contains 8 protein sequences.**

d1sdma\_ d3h4sa1 d2heha\_ d2grya\_ g3kin.1 d3t0qa\_ d4db1a1 d3gbja\_

**Negative dataset contains 3584 protein sequences.**

d1m32a\_ d1libja\_ d1c7na\_ d1iuga\_ d4q75a\_ d2bkwa1 d1t3ia\_ d1n8pa\_  
d1qz9a\_ d1eg5a\_ d1p3wa\_ d3kgwa\_ d1c11a\_ d2ctza1 d1vjoa\_ d2rfva\_  
d1gc0a\_ d1cs1a\_ d1d2fa\_ d2ch1a1 d1qgna\_ d1pffa\_ d1elua\_ d1u08a\_  
d11c5a\_ d1b5pa\_ d2ay1a\_ d1bw0a\_ d3pd6a\_ d7aata\_ d2csta\_ d1j32a\_  
d1fg7a\_ d4wlha\_ d1o4sa\_ d1v2da\_ d1gdea\_ d1m6sa\_ d1v72a1 d1svva\_  
d1ajsa\_ d1wsta1 d2f8ja2 d1vp4a1 d1xi9a1 d2gb3a1 d1yaaa\_ d1dszb\_  
d1a6ya\_ d3cbba\_ d1ynwa1 d1r4ia\_ d1hcqa\_ d2hana\_ d2hanb\_ d2enva1  
d1kb4b\_ d2n11b\_ d1l01a\_ d1cita\_ d2cfba1 d1dfoa\_ d1o69a\_ d1bj4a\_  
d3k28a\_ d2bwpa\_ d3lg0a\_ d2fnua\_ d3ou5a\_ d1z7da1 d1b9ha\_ d1iaya\_  
d4msoa\_ d1bs0a\_ d1s0aa\_ d1sffa\_ d3tqxa\_ d1mdoa\_ d3qboa\_ d3pgya\_  
d1bjna\_ d2dkja\_ d1ejia\_ d1vefa1 d4wxga\_ d3bs8a\_ d3gbxa1 d1w23a\_  
d4nmwa\_ d1dd1a\_ d1e57b\_ d1auyb\_ d3ljqa\_ g1k2x.1 d3ehbb1 d1fftb1  
d1gyca3 d1hfua2 d1kbva1 d1kbva2 d1sdda1 d1sdda2 d1gyca1 d1gyca2  
d1mzya1 d2bw4a1 d1aoza1 d1aoza3 d1aoza2 d1kyaa2 d1kyaa3 d1kyaa1  
d1mzya2 d4e9sa1 d1sddb1 d1sddb2 d1hfua1 d1hfua3 d1oela2 d1v10a2  
d1v10a3 d1v10a1 d1rypd\_ d1irua\_ d1rypc\_ d3unfk\_ d1rypa\_ d1j2pa\_  
d1irui\_ d1j2qh\_ d3unfh\_ d1m4ya\_ d1rypb\_ d1irul\_ d1irug\_ d1iru2\_  
d1q5rh\_ d1rypg\_ d1iruf\_ d1q5qa\_ d1e94a\_ d1irub\_ d1ryph\_ d3ty6a\_  
d1iruj\_ d1iruk\_ d1rype\_ d1irud\_ d1irue\_ d3mi01\_ d1rypf\_ d1iruh\_  
d2z3ba\_ d1iruc\_ d3mka2\_ d1irul\_ d4qgna\_ d1vr3a1 d2bema\_ d1pama1  
d1ea9c1 d1qhoa1 d2fhfa2 d2fhfa1 d1k3ia1 d1j0ha1 d1cxla1 d2bhua1  
d1edqa1 d1flsa2 d1ut9a2 d1gvial d1txka1 d1zx5a1 d1qwra\_ d2phla2  
d2phla1 d1fxza2 d1fxza1 d1lrha\_ d1uija1 g1dgw.1 d2v09a\_ d1uika2  
d1uika1 d1dgwa\_ d1ktja\_ d4alac\_ d1pjwa\_ d1rera1 d1s6na\_ d3uzqb\_

d4mh8a\_ d1mu2a2 d4i7ga1 d1tafa\_ d1tafb\_ d1jfib\_ d1q9ca\_ d1h3ob\_  
d2byka1 d1n1ja\_ d4g92b\_ d1bh9a\_ d1jfia\_ d1h3oa\_ d2bykb1 d1n1jb\_  
d2bjca1 d2hsga1 d1qpza1 d1h4ba\_ d2opoa\_ d1ydwa2 d2nvw2 d1zh8a2  
d1qkia2 d1xeaa2 d1t1ta2 d1r0ka3 d1j5pa3 d1vkoa2 d1vm6a2 d3qvs2  
d1gr0a2 d1p1ja2 d2ovga\_ d1sq8a\_ d1rzsa\_ d3kz3a\_ d3orca\_ d3gpdg2  
d2q49a2 d1hdgo2 d2g17a2 d2cvoa2 d2czca1 d3pwka2 d1obfo2 d1i32a2  
d1zyao2 d2pkqo2 d1b7go2 d2hjsa2 d1cf2o2 d1vkna2 d1ux8a\_ d1dlya\_  
d4i0va\_ d2bkma\_ d1dlwa\_ d2bmma\_ d2msya\_ d2djoa1 d2r5za\_ d1au7a1  
d1f43a\_ d2lmda1 d1akhb\_ d1s7ea1 d3nara\_ d1zq3p1 d2craa1 d1mija\_  
d4uuta\_ d3a01a\_ d1x58a1 d3rkqa1 d3cmya1 d2cqa1 d2da6a1 d1e3oc1  
d1fjla\_ d1mh3a1 d1ig7a\_ d1x41a1 d1wh7a1 d1gt0c1 d2mw8a\_ d1lfup\_  
d1x2ma1 d1b72a\_ d1wi3a1 d1jgga\_ d1wjha1 d1x2na1 d1mnm\_ d2cuea1  
d3k2aa\_ d2hosa\_ d2jwta2 d1pufa\_ d1oact1 d2hi3a\_ d1b8ia\_ d4j19a\_  
d3lnqa\_ d1wh5a1 d1b8ib\_ d1fexa\_ d2cgra1 d1guua\_ d1ug2a1 d2cqa1  
d2ajea1 d4a69c\_ d1h8ac1 d2crga1 d2iw5b1 d1xc5a1 d2cu7a1 d1wgxa1  
d2cjj1 d2ckxa1 d1gvda\_ d6paxa2 d1k78a1 d1k78a2 d1b10a1 d1b10a2  
d1d5ya2 d1k8ka2 d1k8ka1 d3uleb1 d3i33a2 d3i33a1 d1bupa1 d1dkgd2  
d1dkgd1 d4ci6a2 d1jcf1 d4a2ba2 d2fxua1 d1yaga2 d1yaga1 d4cbua2  
d1bupa2 d1ig8a1 d1czan2 d1czan3 d1czan1 d1ig8a2 d1czan4 d1bg3a4  
d1bg3a2 d1bg3a1 d1nira1 d1qksa1 d1hroa\_ d4gedb\_ d3zooa\_ d1mz4a\_  
d1gu2a\_ d1f1fa\_ d1dvva\_ d1c6ra\_ d1c75a\_ d1e29a\_ d1gdva\_ d1cnoa\_  
d1h32b\_ d2bh4x\_ d2aiua\_ d5cytr\_ d1jdl1 d1i8oa\_ d2zboa\_ d3dmia\_  
d1ls9a\_ d1wvec\_ d2yk3a\_ d3ph2b\_ d1dw0a\_ d5aura\_ d1ql3a\_ d1qn2a\_  
d1f1ca\_ d4zzva\_ d2xspa\_ d1eg1a\_ d4v20a\_ d1ojja\_ d4ipma1 d4csia\_  
d3pfza\_ d3ovwa\_ d2yoka\_ d2nqya\_ d1h4ga\_ d1oa2a\_ d1olra\_ d3b7ma\_  
d4h7ma1 d3wp3a\_ d2vgda\_ d1lgoa\_ d3zsea\_ d2nlra\_ d3wx5a\_ d1oa3a\_  
d1pvxa\_ d1m4wa\_ d1f5ja\_ d1oa4a\_ d1ks5a\_ d4ixla1 d1h32a1 d1levsa\_  
d1cnt1\_ d1pvhb\_ d1z7ca\_ d1huwa\_ d1bgea\_ d1rhga\_ d1f6fa\_ d1f45b\_  
d1i1rb\_ d1axia\_ d1letea\_ d3tgxb\_ d1scfa\_ d2z3qa1 d3qb1a\_ d1hula\_  
d1m48a\_ d4nkqb\_ d1eera\_ d1v7mv\_ d5e4ea\_ d2o27a\_ d3b5ka\_ d2psma1  
d4zf7a\_ d3uf5a\_ d4x51a\_ d1d9ca\_ d4ypgc1 d3oq3a\_ d1lqsl\_ d1n1fa\_  
d1aula\_ d1wu3i\_ d3bes1\_ d3ux9a\_ d3rbaa\_ d2qtra\_ d1nupa\_ d3l92a\_  
d1f9aa\_ d1qjca\_ d2h29a\_ d1vlha\_ d1od6a\_ d1lw7a1 d1mrza2 d4ruka\_  
d2e17a\_ d1iq0a2 d1irxa2 d1r6ta2 d1ivsa4 d2cyba\_ d1rqga2 d1j09a2  
d2yxna\_ d1f7ua2 d1h3fa1 d1ffya3 d2g36a1 d1jila\_ d1n3la\_ d1i6la\_  
d1pfva2 d1h3na3 d3n9ia\_ d3sz3a1 d3sw2a\_ d1moxc\_ d1dx5i3 d1edmb\_  
d1aut12 d1aut11 d1dva11 d1szba2 d1kigl\_ d2y5f1\_ d1ijqa2 d1gk5a\_  
d1g1sa2 d1nt0a3 d1xdtr\_ d1lmja2 d1lmja1 d1nzia2 d2wphe\_ d1klil\_  
d1pfx12 d1pfx11 d1p9ja\_ d1g1ta2 d1f7ea\_ d4yzub\_ d2mgpa1 d1b9wa1  
d1b9wa2 d2mgpa2 d1ob1c1 d1n1ia2 d1n1ia1 d2npra2 d2npra1 d2h1ia1  
d2r8ba1 d3b5ea1 d3cn9a\_ d1auoa\_ d1f56a\_ d1bypa\_ d1azca\_ d1ws8a\_  
d3u25a\_ d1cuoa\_ d1id2a\_ d1rkra\_ d2iaac\_ d4dp1x\_ d1nwpa\_ d2gima\_  
d2i7sa\_ d1qhqa\_ d1qx2a\_ d2y5ia\_ d1psra\_ d3n22a\_ d2egda\_ d4ggfc\_  
d2wcea\_ d2luca\_ d4aqia\_ d3nsia\_ d2lp3a\_ d1j55a\_ d1a4pa\_ d1k8ua\_

d1nsha\_ d1pvaa\_ d3fs7a\_ d2pvba\_ d1ttxa\_ d1rwya\_ d2kyfa\_ d1rk9a\_  
d1a75a\_ d1exra\_ d1tiza1 d1nyaa\_ d1g8ia\_ d1ggwa\_ d1wdcc\_ d3fwba\_  
d1ggza\_ d2o5ga\_ d1ctaa\_ d1m45a\_ d3i5gc\_ d1sl8a\_ d1fpwa\_ d2scpa\_  
d2roaa\_ d4aqra\_ d3pn7b\_ d1br1b\_ d2mysb\_ d1s6ca\_ d1bjfa\_ d2obha\_  
d1jfka\_ d1jf0a\_ d1qv0a\_ d1lkja\_ d2mlfc\_ d2m97a\_ d2d8na\_ d4by5a\_  
d1jbaa\_ d4nqga\_ d1wdcb\_ d2mysc\_ d1j7qa\_ d1s6ia\_ d1uhka2 d1r2ua\_  
d3kf9a\_ d3pn7c\_ d1fi6a\_ d1c07a\_ d1gjya\_ d1y1xa\_ d1hqva\_ d1dvia\_  
d1df0a1 d1qxpa2 d4usla\_ d1sfsa\_ d1wkya2 d1uuqa\_ d3wh9a\_ d4mlra\_  
d1xyza\_ d4xuya\_ d2je8a5 d4bf7a1 d3cuia\_ d1ur4a\_ d1qw9a2 d1lodza\_  
d2vzsa5 d1bqca\_ d2x2ya1 d1hjqa\_ d1qnra\_ d4y7ea1 d1vjza\_ d4k68a\_  
d2v3ga\_ d4hpga\_ d1nofa2 d1nq6a\_ d1h4pa\_ d1aq0a\_ d3ziza\_ d4bs0a\_  
d1ecea\_ d1h1na\_ d1ta3b\_ d1w91a2 d1ilwa\_ d1uhva2 d1us3a2 d1legza\_  
d7a3ha\_ d1tvna1 d3nyda1 d1ghsa\_ d2cyga1 d4xv0a\_ d2c8na2 d1w32a\_  
d3emca\_ d1v6ya1 d1foba\_ d2uwfa1 d2fgla\_ d3niya1 d2c0ha1 d1rh9a1  
d1yq2a5 d1szna2 d1fa2a\_ d1pama4 d5do8a1 d1ea9c3 d1hx0a2 d2fhfa5  
d1qhoa4 d1avaa2 d1m53a2 d4m8ua1 d2gjpa2 d1lwha2 d4howa1 d1ktba2  
d1j0ha3 d3vm5a1 d2x1ia\_ d1wzaa2 d1uasa2 d2diea1 d1mxga2 d1ht6a2  
d1eswa\_ d1liv8a2 d5cpsa\_ d1ud2a2 d1zjaa1 d3gbea1 d1kwga2 d1wdpa\_  
d1gcya2 d1g5aa2 d1hvxa2 d3dhpa2 d2bhua3 d4do4a1 d3qgva1 d1e43a2  
d1g94a2 d2d3na2 d1gjwa2 d1gvia3 d1x1na1 d1r7aa2 d1tz7a1 d4toqa\_  
d1wb0a1 d1w9pa1 d1litxa1 d1kfwa1 d1goia2 d1ledqa2 d2gsja\_ d1hjxa1  
d1jnda1 d1vf8a1 d1umqa\_ d1g2ha\_ d1mixa2 d1e5wa2 d1j19a2 d1isna2  
d2a16b2 d1x14a1 d1n9pa\_ d3vsqa\_ d2gixa1 d1iuka\_ d2csua1 d3q9ub\_  
d2yv1a1 d3q9na\_ d2d59a\_ d1oi7a1 d2yv2a1 d1euca1 d1y81a1 d1wgqa1  
d1v89a1 d2coda1 d1zc3b\_ d1wg7a1 d1u5ea1 d1v61a1 d2coca1 d2ys1a1  
d1v5pa1 d1ntya2 d1wjma1 d1wil1a1 d1u29a\_ d1xx0a1 d1unqa\_ d2zkmx3  
d1fhoa\_ d1v88a1 d2adza1 d1x1fa1 d1p6sa\_ d2coaa1 d1btka\_ d1v5ma1  
d1faoa\_ d2x18a\_ d1dyna\_ d1x1ga1 d4kaxb\_ d2j59m1 d1ki1b2 d1xcga2  
d1txda2 d1u5da1 d1dbha2 d1wlha\_ d1upqa\_ d1v5ua1 d1foea2 d2fj1a1  
d1eaza\_ d2dfka2 d2cofa1 d1kz7a2 d9ldta1 d2ewda3 d1up7a1 d2dfda1  
d1s6ya1 d1vjta1 d7mdha1 d1hyea1 d1t2da1 d1ojsa3 d1b8pa1 d1ldna1  
d1hyha1 d1civa1 d2a92a1 d1ez4a1 d1i0za1 d1y6ja1 d1gv0a1 d1ur5a1  
d1llda1 d1obba1 d1v8ba1 d1gdha1 d1l7da1 d2llda1 d1ygya1 d1qp8a1  
d1li4a1 d1j4aa1 d2naca1 d1npya1 d3t4ea2 d1a4ia1 d1o0sa1 d2hk9a2  
d2egga2 d1b26a1 d1bvua1 d1gq2a1 d1c1da1 d1leha1 d1gtma1 d1euza1  
d1nvt1a1 d3dona2 d1gpja2 d1vi2a1 d1p77a1 d1nyta1 d1b0aa1 d1vl6a1  
d1v91a1 d1txga2 d3f47a1 d1mv8a2 d2pv7a2 d1xc2a3 d2ahra2 d4xiya1  
d2f1ka2 d1pgja2 d1i36a2 d1np3a2 d1lj8a4 d1teaa3 d1qmga2 d2i76a2  
d2g5ca2 d1wdka3 d1dlja2 d3cuma3 d1kola2 d1qora2 d1jqba2 d1vj0a2  
d1cdoa2 d1gu7a2 d1d1ta2 d1xa0a2 d2dm6a2 d1jvba2 d1rjwa2 d1llua2  
d1h2ba2 d1tt7a2 d1piwa2 d1o89a2 d1iz0a2 d1e3ja2 d1yb5a2 d1uufa2  
d1vj1a2 d1e3ia2 d3gpdg1 d2nvwa1 d1u8fo1 d1ydwa1 d1hdgo1 d2g17a1  
d1cf2o1 d2czca2 d1r0ka2 d1obfo1 d2cvoa1 d1ebfa1 d1h6da1 d1i32a1  
d1zh8a1 d2q49a1 d1qkia1 d1j5pa4 d3pzra1 d1xeea1 d1vkoa1 d1vm6a3

d3qvsa1 d2pkqo1 d1b7go1 d1gr0a1 d1p1ja1 d1lc0a1 d1j0xo1 d3pwka1  
d2hjsa1 d1zyao1 d1vkna1 d1tlta1 d1nvmbl d3sjua\_ d3ojfa1 d1xu9a1  
d2jjya1 d1n7ha\_ d1y1pa1 d1h5qa\_ d1jtva\_ d4fs3a\_ d2bkaa1 d1gy8a\_  
d2c5aa1 d1ulsa\_ d1ooea\_ d2b69a1 d1y5ma1 d1spxa\_ d1ae1a\_ d1ydea1  
d1gega\_ d1hdoa\_ d1o5ia\_ d1e6ua\_ d1snya1 d2rhca\_ d3zv4a\_ d5ceja\_  
d2d1ya1 d1fjha\_ d3w8ea\_ d2fmua1 d1x1ta\_ d1rpna\_ d3ay7a1 d1k2wa\_  
d1eq2a\_ d2hrba1 d3ruaa\_ d2ew8a1 d4hwka\_ d1xgka\_ d2bd0a1 d1yo6a1  
d2a35a1 d2ntva\_ d1vl8a\_ d1hdca\_ d4bkua\_ d2ag5a1 d2q45a\_ d1nffa\_  
d4iy1a\_ d1zbqa1 d1kewa\_ d1ek6a\_ d1ja9a\_ d2q46a2 d1iy8a\_ d1cyda\_  
d2ptga\_ d1hxha\_ d1uzma1 d3ly1a\_ d4m89a\_ d3wyea\_ d2b11a1 d1w6ua\_  
d1sb8a\_ d2q2va\_ d4nr0a\_ d1e6wa\_ d2gasa\_ d3oiga1 d2bgka1 d1mxha\_  
d1vl0a1 d1rkxa\_ d1r6da\_ d1wmaa1 d1e7wa\_ d2c07a1 d1xkqa\_ d3tzha\_  
d1g0oa\_ d3lz6a\_ d1qyca\_ d1ledoa\_ d1gz6a\_ d1oc2a\_ d1t2aa\_ d1zema1  
d2xoxa\_ d1z45a2 d1geea\_ d1p33a\_ d3lt0a\_ d4e6pa\_ d2wyua\_ d1db3a\_  
d4q9na\_ d1xh1a\_ d4o1ma\_ d1fmca\_ d2uvda\_ d2gdza1 d1uaya\_ d2z1ma\_  
d2o23a2 d2fr1a2 d2fr1a1 d1qsga\_ d1qyda\_ d4zjua\_ d2a4ka1 d1yb1a\_  
d1wvga1 d1yxma1 d3f4ba\_ d1mg5a\_ d1xg5a1 d1r55a1 d3gboa\_ d1atla\_  
d1kufa\_ d1buda\_ d4q11a\_ d1ypl1a\_ d1wnia\_ d2gfoa1 d1vjva\_ d2ayna1  
d3nhea\_ d4wfia\_ d4cg1a1 d3visa\_ d1t3ca\_ d1epwa3 d2a97a\_ d3fiea\_  
d3ioqa\_ d1fh0a\_ d1o0ea\_ d1khqa\_ d1m6da\_ d2cb5a\_ d1cs8a\_ g8pch.1  
d1s4va\_ d2pnsa\_ d1vsna1 d1mira\_ d1iwda\_ d2oula\_ d7pcka\_ d3bwka\_  
d3bcna\_ d2p86a\_ d1pvja\_ d1pcia\_ d1gece\_ d1deua\_ d4bs6a\_ d1xkga1  
d1cqda\_ d1jqpa2 d2c0ya\_ d2bdza\_ d3p5ua\_ d1zoya1 d1d4ca2 d1chua2  
d1jnra2 d1kf6a2 d2jk6a2 d2jk6a1 d1feca1 d1feca2 d1lpfa1 d1lpfa2  
d1xhca1 d1xhca2 d1dx1a2 d1dx1a1 d1gera2 d1m6ia2 d1onfa1 d1onfa2  
d3lada2 d3lada1 d1w4xa1 d1w4xa2 d1gesa2 d1mo9a1 d1xdia1 d1fl2a2  
d1fl2a1 d1fcda1 d1fcda2 d1h6va2 d1h6va1 d1mo9a2 d1gv4a2 d1gv4a1  
d2gv8a2 d2gv8a1 d1aoga1 d1aoga2 d1hyua1 d1ebda1 d1ebda2 d3dk9a1  
d1q1ra2 d1q1ra1 d1gesa1 d1w5qa\_ d2c1ha\_ d1ohla\_ d1l6sa\_ d1zbfa1  
d2z1ha\_ d2etja1 d3qioa1 d1j11a\_ d2e41a\_ d1j12a\_ d2lsna1 d1uaxa\_  
d2yv0x\_ d1mu2a1 d1ekea\_ d1i39a\_ d1pn0a1 d1reoal d1ju2a1 d2f5va1  
d3c96a1 d2gmha1 d1pj5a2 d1gpea1 d1o5wa1 d1n4wa1 d2dw4a2 d2ivda1  
d1seza1 d2voua1 d1kdga1 d1s5ja1 d2hbja2 d2igia\_ d1wlja\_ d1qhta1  
d4dlea1 d1tgoa1 d2f96a1 d3tr8a1 d3mxma\_ d1q8ia1 d1y97a1 d1w0ha\_  
d1kfsa1 d2py5a1 d1noya\_ d1d5aa1 d1yt3a3 d2guia\_ d3mwpa1 d4kb1a\_  
d1idla\_ d2hmta\_ d1iv0a\_ d2v76a\_ d1wj1a1 d1aqca\_ d1qqga2 d1ntva\_  
d1n3ha\_ d4dbba\_ d3f0wa1 d1p3ra\_ d1wgua1 d2cy4a1 d3hqca\_ d1wvha1  
d1xr0b1 d1v58a1 d1t3ba1 d4ilfa2 d4npba2 d3nvva1 d1krha3 d2h88b1  
d1n62a2 d1t3qa2 d1kf6b2 d1zoyb1 d1jq4a\_ d1dgja2 d1rm6c2 d1r7ha\_  
d1faaa\_ d1wika1 d1xfla\_ d1ttza1 d2f51a1 d1ti3a\_ d1nhoa\_ d1sena\_  
d2i4aa\_ d1ep7a\_ d1zmaa1 d1fo5a\_ d3lefa1 d3diea1 d2yana1 d1z6na1  
d1oaza\_ d3zywa1 d4aj8a\_ d1nm3a1 d4fiwa\_ d1wmja\_ d4hs1a1 d1liloa\_  
d1xwaa1 d1wjka1 d2vm1a\_ d1fb6a\_ d1gh2a\_ d1h75a\_ d1nw2a\_ d1kx5b\_  
d3a6na\_ d4m6ba2 d2nqbd\_ d3wkjd\_ d2yfwe\_ d4h9na\_ d5bnxa\_ d1kx5c\_

d3r45a\_ d1eqzb\_ d4jjnb\_ d1f66c\_ d1eqza\_ d4wnnb\_ d1kx5a\_ d1u35c1  
d1id3a\_ d2nqbc\_ d1kx5d\_ d2b5ea2 d2b5ea3 d2b5ea1 d2b5ea4 d2kpl1a1  
d2kp2a1 d1hyua3 d1hyua4 d1j08a1 d1j08a2 d1pd212 d2a2ra2 d1k0dd2  
d1f2ea2 d1gsua2 d1f3ba2 d2fhea2 d2pvqa1 d1tw9a2 d1oyja2 d1e6ba2  
d1k0ma2 d3ik7a1 d4is0a1 d1r5aa2 d1jlva2 d1m0ua2 d3gtub2 d1z9ha2  
d1okta2 d1axda2 d2gsra2 d1tu7a2 d1k3ya2 d1zagma1 d1b48a2 d1gnwa2  
d1gwca2 d2gsta2 d1glqa2 d1oe8a2 d1pn9a2 d1v2aa2 d1fw1a2 d1duga2  
d1g7ea\_ d1a0rp\_ g1qmo.1 g1len.1 d3zyra\_ d1fnya\_ d1n47a\_ g2ltn.1  
d1avba\_ d3usua\_ d1dhkb\_ d1f9ka\_ d1ukga\_ d1g8wa\_ d1g9fa\_ d1wbfa\_  
d3wcsa\_ d1g7ya\_ g1loe.1 d1mvqa\_ d1hq1a\_ d1v6ia\_ d1qnwa\_ d1fx5a\_  
d4l8qa\_ d1ioaa\_ d3n35a\_ d4ilya\_ d4olta\_ d1qgia\_ d1sefa\_ d1sfna\_  
d1rc6a\_ d1qqya\_ d1gd6a\_ d1f6ra\_ d1ivma\_ d2gv0a\_ d1iiza\_ d2z2fa\_  
d1j8xa\_ d1gh1a\_ d1b9oa\_ d1741a\_ d1691a\_ d2o4wa\_ d1p37a\_ d1k28a3  
d1xjta1 d1jtma\_ d2f2qa\_ d4e97a1 d1iyka1 d1rxta1 d1iica2 d1iica1  
d2pjsa1 d1k11a\_ d2i7ra1 d1xqaa1 d5cj3a1 d1npba\_ d1jifa\_ d2p7oa\_  
d1r9ca\_ d1nkia\_ d1mpya2 d1kw3b2 d1kw3b1 d4ghga1 d1tfza1 d3isqa1  
d3isqa2 d1sqia1 d1sqia2 d1lkda2 d1lkda1 d1mpya1 d1cjxa2 d1sp9b2  
d1t47a1 d1t47a2 d1f1ua2 d1sp8a1 d1sp8a2 d1f1ua1 d1s5ja2 d1qhta2  
d4dlea2 d1tgoa2 d3py8a2 d1q8ia2 d1kfsa2 d2py5a2 d1d5aa2 d1c4qa\_  
d1prtcl d2wv6d\_ d1prtfl\_ d1ltrd\_ d4l63b1 d1r4pb\_ d1prtd\_ d1tl0f\_  
d1prtbl1 d3chbd\_ d1xvqa1 d1pn0a2 d3hy2a\_ d2cvba1 d1o8xa\_ d1lu4a\_  
d1we0a1 d2bmx1a1 d2a4va1 d1psqa\_ d1xiya1 d1q98a\_ d1n8ja\_ d1zofa1  
d2ggta\_ d3tjja\_ d4je1a1 d1o73a\_ d3s9fa\_ d2zcta\_ d1qmva\_ d1jfua\_  
d2b1ka\_ d5dvba1 d2b5xa1 d2v2ga\_ d1st9a\_ d3tb2a\_ d4llra\_ d4fh8a1  
d1e2ya\_ d2h30a\_ d1i5ga\_ d2z9sa\_ d2f8aa1 d1tp9a1 d2b7ka\_ d1nm3a2  
d3hvva\_ d2wfc1a1 d4kcea\_ d1xvwa1 d4gqca1 d3qpma\_ d4k1fa\_ d1zzoal  
d1gp1a\_ d1prxa\_ d1cg2a1 d1yloa2 d1y7ea2 d1y0ya3 d1lfwa1 d1vixa1  
d1fnoa4 d1vh0a2 d1ysja1 d1vhea2 d1z21a1 d2fvga2 d1vgya1 d1r3na1  
d2grea2 d1xmba1 d1rtqa\_ d1etha2 d1w52x1 d2ppla1 d1hpla2 d1lpbb2  
d2oxea1 d1bu8a2 d1rp1a2 d1ys1x\_ d4hs9a\_ d1ispa\_ d1ku0a\_ d3qmma\_  
d3rp2a\_ g1lucy.1 d1fuja\_ d2zchp\_ d3w94a\_ d1si5h\_ d1lo6a\_ g2pka.1  
d1cgha\_ d1kigh\_ d1a5ia\_ d3s9ba\_ d1hj8a\_ d1ao5a\_ d2anya\_ d1q3xa1  
d1gvza\_ d1azza\_ d4gsoa\_ d2f91a1 d1iaua\_ d1gdna\_ d1eufa\_ g1fiw.1  
d1eq9a\_ d4nfea\_ d2rdla\_ d1spja\_ d1elva1 d1a7sa\_ d1ekbb\_ d1pfxc\_  
d1yc0a\_ d2aiqa\_ g1fiz.1 d1fi8a\_ d4k60a\_ d4dgja\_ d1mzaa\_ d1op0a\_  
d3tjva\_ d1pytd\_ d1sgfg\_ g1gg6.1 d2eeka\_ g1rtf.1 d1a0ja\_ d3g01a\_  
d1pytc\_ d4e7na\_ d1ddja\_ d1z8ga1 d2hlca\_ d1npma\_ d1brup\_ g1jou.1  
d1sgfa\_ d1autc\_ g2hnt.1 g1kdq.1 d1orfa\_ d3s69a\_ d4crga\_ d1fxya\_  
d1bqya\_ d1lgya\_ d4l3wa\_ d1llfa\_ d1gz7a\_ d1ukca\_ d2hqya1 d2hqya2  
d1ne9a1 d1lrza3 d1ne9a2 d1svpa\_ d1mbma\_ d3su6a1 d1cula1 d4agka\_  
d1vcpa\_ d1q31a\_ g1n11.1 d3e90b\_ d1ep5a\_ d3u1jb\_ d3zxha\_ d1cgl1a\_  
d1rm8a\_ d1eaka2 d1hy7a\_ d2jsda\_ d1cxva\_ d1hv5a\_ d1i76a\_ d4qmea2  
d2xdt2a2 d1z5ha2 d4dv8a2 d1m41a\_ d2bk7a\_ d3fjua\_ d1z5ra1 d1kwma1  
d1uwya2 d1jqga1 d2c1ca1 d1dt1a\_ d1h81a2 d2tbvc\_ d1c8nc\_ d1x36a\_



d1smvc\_ d1ng0c\_ d4sbvc\_ d1lopoa\_ d1f2nc\_ d1y29a\_ d1v7fa\_ d2jtba\_  
d1d1ha\_ d1g9pa\_ d1lupa\_ d1qk7a\_ d1mb6a\_ d2a2va\_ d1niya\_ d1i25a\_  
d1hwva\_ d2mpqa\_ d1ie6a\_ d1kqha\_ d1la4a\_ d2mxa1\_ d1d10a\_ d1koza\_  
d1qk6a\_ d1emxa\_ d1lqra\_ d1c6wa\_ d1rmka\_ d1ixta\_ d1eyoa\_ d1cna\_  
d1fu3a\_ d1g1pa\_ d1f3ka\_ d1fyga\_ d3lgia\_ d3i77a\_ d2z9ia2\_ d4nsva\_  
d1lcya2\_ d4jcna\_ d1agja\_ d1os8a\_ d1hpga\_ d1p3ca\_ d1l1ja\_ d1qtfa\_  
d1ny721\_ d1ny722\_ d1a6ca3\_ d1a6ca2\_ d1pgl22\_ d1pgl21\_ d1pgl11\_ d1ny711  
d1mqta\_ d1d4m3\_ d1fmd3\_ d2mev1\_ glaym.1\_ d1ev13\_ d4q4w1\_ d1r1a3\_  
d2x5ia\_ d1rhi1\_ g1r1a.1\_ g1d4m.1\_ g1rhi.1\_ d1b35b\_ d1loopa\_ d1tme1\_  
d4iv1a\_ g1pvc.1\_ g1fpn.1\_ d1fpn1\_ d4gb31\_ d1d4m1\_ d1fmd1\_ d1ev11\_  
d2wzr3\_ g1cov.1\_ d1qqp3\_ g1fmd.1\_ d2x5ic\_ d1rhi3\_ gloop.1\_ d1hxs1\_  
g1hxs.1\_ d1fpn3\_ d1bev1\_ g2mev.1\_ d1eah3\_ d1aym1\_ d1pvc3\_ d1qqp1\_  
d1zba3\_ d1h8ta\_ d3vbhc\_ g1b35.1\_ g1bev.1\_ d1hxs3\_ g1ev1.1\_ d1bev3\_  
g1tmf.1\_ d1tmf1\_ d1b35a\_ d2mev3\_ g1eah.1\_ g1h8t.1\_ d1eah1\_ d4q4w3\_  
d1r1a1\_ d1aym3\_ d1zba1\_ d1h8tc\_ d1oopc\_ d1tme3\_ g1qqp.1\_ d4iv1c\_  
g1tme.1\_ d3ubub\_ d1legia\_ d1v7pa\_ d1tdqb\_ d3ubua\_ d1c3ab\_ d1h8ua\_  
d3bx4b\_ d1t8ca1\_ d1sb2a1\_ d1qdda\_ d2ziba1\_ d3cada\_ d1byfa\_ d1j34b\_  
d1jwia\_ d1jzna\_ d1c3aa\_ d1oz7b\_ d1wmza\_ d3bdwb\_ d1hq8a\_ d1fifa1  
d1dv8a\_ d3hupa\_ d1wk1a1\_ d1umra\_ d2afpa\_ d3bx4a\_ d1gz2a\_ d1sl6a\_  
d1v7pb\_ d3g8ka\_ d1ixxa\_ d1j34a\_ d1jwib\_ d1g1sa1\_ d1y17a1\_ d1ja3a\_  
d1fvub\_ d3bdwa\_ d1sb2b1\_ d1fvua\_ d1umrc\_ d1oz7a\_ d4m17a\_ d3cfwa1  
d1ypqa1\_ d1g1ta1\_ d3fd4a\_ d3l9jc\_ d4dn8a1\_ d1v4lb\_ d1rd11\_ d2msba\_  
d4w9ta\_ d1jvna1\_ d4x2ra1\_ d1qo2a\_ d4axka1\_ d1thfd\_ d1h5ya\_ d4u28a\_  
d2y88a\_ d4wd0a\_ d1vzwa1\_ d3exra\_ d2ffca1\_ d2fdsa1\_ d3n3ma1\_ d2czda\_  
d1q6oa\_ d2yyua\_ d1vqta1\_ d1dbta\_ d3ldva1\_ d2flia1\_ d1rpxa\_ d1tqja\_  
d1tqxa\_ d4lt9a1\_ d3tc7a1\_ d3hoja\_ d1i4na\_ d3vnda\_ d3n18a1\_ d1geqa\_  
d3naval\_ d1v5xa\_ d4a2ra1\_ d3tc6a1\_ d1ujpa\_ d4ijba\_ d1xcfa\_ d1vc4a\_  
d1rd5a\_ d3b5va\_ d2r80b\_ d1cqxa1\_ d1cg5a\_ d1gcvb\_ d3boma\_ d2h8fb\_  
d2raoa\_ d3bj1a\_ d4hrrb\_ d2r50a\_ d3d1kb\_ d2aa1b1\_ d3zhwa\_ d3hf4b\_  
d3gdja\_ d1jebb\_ d3bj1b\_ d1x9fb\_ d1wmub\_ d1gcva\_ d3bcqb\_ d3d4xb\_  
d1gvha1\_ d2dc3a\_ d3hf4a\_ d4yu3a\_ d3k8ba\_ d1qpwb\_ d2r80a\_ d3bcqa\_  
d1v4wa\_ d3wtgb\_ d1j17a\_ d4esaa\_ d1a9we\_ d3d1ab\_ d1fsla\_ d4h21a\_  
d1v4wb\_ d1mwca\_ d1vhba\_ d1jeba\_ d1spgb\_ d1h97a\_ d1q1fa\_ d1tu9a1  
d3d1aa\_ d1hdsb\_ d3hyub\_ d2zfbb\_ d3fs4a\_ d1oj6a\_ d1shrb\_ d4h21b\_  
d4yu3b\_ d1spga\_ d3hrwa\_ d3qqra\_ d3at5a\_ d4wchd\_ d3hyua\_ d1cg5b\_  
d1uc3a\_ d1hbra\_ d2raob\_ d1outb\_ d4esab\_ d3gdjb\_ d3qqqa\_ d1x9fc\_  
d3vrf\_a\_ d1litha\_ d3mkba\_ d3d4xa\_ d3mjpa\_ d1j16a\_ d3fh9a\_ d1louta\_  
d2dc3b\_ d1lit2a\_ d3eoka\_ d3g46a\_ d1qpwa\_ d3vrfb\_ d1ch4a\_ d1x9fd\_  
d1hdsa\_ d2zfa\_ d3mkbb\_ d1or4a\_ d3wtga\_ d1a4fa\_ d3fh9b\_ d3bomb\_  
d3cy5a\_ d3at5b\_ d1x9fa\_ d2oifa\_ d4lmb\_ d1cpcb\_ d3v57a\_ d1kn1a\_  
d1cpca\_ d4f0ta\_ d2vjha\_ d4po5b\_ d1eyxa\_ d1alla\_ d4f0tb\_ d1b33b\_  
d1b8db\_ d4h0mb\_ d1b33a\_ d2vjhb\_ d4lmb\_ d2vmlb\_ d1allb\_ d2vjta\_  
d3dbja\_ d2vmla\_ d2vjtb\_ d4f0ub\_ d1f99b\_ d4rmpa1\_ d1liaa\_ d1eyxb\_  
d2uulb\_ d4lmsb\_ d4f0ua\_ d2bv8a\_ d1f99a\_ d2bv8b\_ d2c71b\_ d3dbjb\_

d4rmpb1 d1b8da\_ d4h0ma\_ d3v57b\_ d1kn1b\_ d1liab\_ d2uula\_ d2j96a\_  
g1gxs.1 d1k8qa\_ d2xqfa\_ d1f6wa\_ d1dx4a\_ d1qe3a\_ d1k4ya\_ d4qwwa\_  
d2ha2a\_ d1sfra\_ d1f0na\_ d4qeka\_ d3c8da2 d2pbla1 d1jkma\_ d1lzla\_  
d1jjfa\_ d1jmxa4 d1jmxa3 d1pbya3 d1offa\_ d1frra\_ d3wcqa\_ d1e9ma\_  
d1l5pa\_ d1wria\_ d1i7ha\_ d3av8a\_ d1czpa\_ d1rfka\_ d3p1ma1 d3b2ga\_  
d2bt6a2 d4iuua3 d4bvva\_ d5hpga\_ d3k65a\_ d1ki0a3 d1ki0a2 d1ki0a1  
d1a0ha1 d1pmla\_ d3sp8a3 d2feba1 d1f74a\_ d3l21a\_ d2e1da\_ d1to3a1  
d1w3ia\_ d1sfla\_ d1n7ka\_ d1vcva1 d4imea\_ d1wa3a\_ d2ocza1 d1f2ja\_  
d3m16a\_ d2yxga\_ d1ub3a\_ d3a5fa\_ d1fbaa\_ d1l6wa\_ d1xfba1 d1wx0a1  
d1vpxa1 d1ojxa\_ d1mxsa\_ d2a4aa1 d1xkya1 d3cq0a1 d3s1xa\_ d1f05a\_  
d1fdja\_ d3cp1a1 d4d2ja\_ d1e88a1 d1l6ja5 d1l6ja4 d1eaka4 d1eaka3  
d1l6ja3 d1h8pa2 d1gyta2 d2ftba\_ d1pmpa\_ d2rcqa1 d1fdqa\_ d4lkpa\_  
d1sa8a\_ d1vyfa\_ d1lpja\_ d3vg7a1 d4azqa1 d1o8va\_ d5bvqa\_ d1p6pa\_  
d2qo4a\_ d1opba\_ d1yiva1 d1o1va\_ d4bvma1 d4tkba\_ d4i3ba\_ d1bwya\_  
d1ftpa\_ d4gkca\_ d1cbia\_ d3p6da1 d1kqwa\_ d2a0aa1 d3gv5b1 d1t94a2  
d3bq0a2 d2i49a\_ d1nnfa\_ d1xvxa\_ d1ursa\_ d1h3da1 d1iuda\_ d4mlva1  
d1twya\_ d3e13x\_ d2nxoa1 d4pfua\_ d3ttma\_ d1elja\_ d2qmwa1 d1us5a\_  
d1y3na1 d1jeta\_ d1uqwa\_ d4f19a1 d2esna2 d3thia\_ d3fasa1 d2uyeb\_  
d2xwva1 d1r9la\_ d2fyia1 d1pb7a\_ d2ozza1 d1sw5a\_ d1nh8a1 d1vr5a1  
d2g29a\_ d1xs5a\_ d3lswa\_ d2z23a\_ d3w9va\_ d3tcha\_ d1q35a\_ d1z7me1  
d3q27a\_ d1p99a\_ d1ve4a1 d2i6ea1 d4mcoa1 d4n8ya\_ d1eu8a\_ d1zbma1  
d1hsla\_ d1ixca2 d1j1na\_ d1xvya\_ d1y9ua\_ d2z22a1 d1xoca1 d4oera\_  
d1wdna\_ d5f1qa1 d1xt8a1 d4gwoa\_ d4igta1 d1pc3a\_ d4mmpa1 d1o63a\_  
d2czla1 d2onsa2 d4mija1 d1eh3a\_ d3skpa\_ d1dtza1 d1ieja\_ d1jnfa2  
d1ce2a1 d1jnfa1 d1b1xa2 d1b1xa1 d1jw1a1 d1jw1a2 d1ryoa\_ d1h76a1  
d1h76a2 d3q3ma\_ d1za0a1 d2inca\_ d1jk0a\_ d2incb\_ d1mhyb\_ d3hf1b\_  
d1mtyb\_ d1r2fa\_ d2uw1a\_ d1mhyd\_ d3n37a\_ d1afra\_ d1oquc\_ d1syya\_  
d1mtyd\_ d2o1za\_ d1uzra\_ d1smsa\_ d2fkza\_ d1zuja1 d1s3qa1 d2fjca1  
d1z6om1 d1veia\_ d4dyya\_ d1jiga\_ d3gvya\_ d2pyba\_ d4cy9a1 d3bvfa1  
d1r03a\_ d2cf7a\_ d1nf4a\_ d1zs3a1 d4iwka\_ d3ka8a\_ d3np0x\_ d1n1qa\_  
d1l1b3a\_ d4e6ka\_ d1z6oa1 d2fzfa1 d4dyua\_ d3ge4a\_ d1jgca\_ d4am4a\_  
d2z6ma\_ d1ji5a\_ d1vlga\_ d1krqa\_ d3qz3a\_ d1o9ra\_ d2ffxj\_ d1euma\_  
d1yv1a1 d2v2pa\_ d1j30a\_ d4di0a\_ d1dpsa\_ d1oewa\_ d2qzxa\_ d2asia\_  
d1psoe\_ d1miqa\_ d1smra\_ d2h6ta\_ d1pfza\_ d1izda\_ d3hd8a\_ d1j71a\_  
d1dpja\_ d4aa9a\_ d1t6ex\_ g1b5f.1 g1lya.1 g1htr.1 d1qdma2 d1bxoa\_  
d1wkra\_ d1tzsa\_ d1libqa\_ d2qzwa\_ d1ex4a2 d1c6va\_ d1bdqa\_ d3ggta\_  
d3ixoa\_ d1mrxa\_ d2haha\_ d1tw7a\_ d4njsa\_ d1sgua\_ d2p3da\_ d1nsoa\_  
d3d3ta\_ d2rkfa\_ d1c6ya\_ d2rspa\_ d3ogpa\_ d3ekwa\_ d2o4na\_ d2j9ja\_  
d3ggua\_ d3lzua\_ d4npua\_ d4j55a\_ d2r8na\_ d2fxda\_ d2p3ca\_ d4dqa\_  
d3ttpa\_ d3t3ca\_ d2p3aa\_ d2hc0a\_ d2fdda\_ d3mwsa\_ d1wgra1 d1ef5a\_  
d1wfyal d1e8ya3 d1wgya1 d1l1fda\_ d2cs4a1 d1wxma1 d2byea1 d3kh0a1  
d2byfa1 d1wxaa1 d1e7ua3 d1h4ra3 d4y18a1 d2a16a3 d3ruib\_ d1eo6a\_  
d3waob\_ d2r2qa1 d3m95a\_ d3wana\_ d2a13a1 d2cr5a1 d1wj4a1 d1s3sg\_  
d3ubra\_ d1qo8a1 d1d4ca1 d2k3va\_ d1ft5a\_ d1qdba\_ d1m1qa\_ d2j7aa\_

dlogyb\_ d4fasa\_ dljnia\_ dloaha\_ dlsp3a\_ dlqoza\_ d5ajha1 d4lu0a\_  
dlof8a\_ d3unda1 d3e9aa1 dlvr6a2 dln8fa\_ d2qkfa\_ dld9ea\_ d3h33a\_  
dlrwja\_ dlos6a\_ d3bxua\_ d3h4na\_ dli77a\_ d3caoa\_ dlj0pa\_ d2ctha\_  
dlduwa\_ dlofwa\_ d2e84a\_ dlhh5a\_ dlgyoa\_ d3h34a\_ d2bcgg1 d2bcgg2  
g1y43.1 dladqa1 dlfnqa1 dluvqb1 dlzs8a1 d2vola1 d2vola2 d1mfb12  
d2jelh2 dluwel2 d3qq4b1 dlkjbv\_ dlk5na1 d1osph2 d4odhl2 dlow0a1  
dlow0a2 dlbfob2 d3l9ra2 d3jtth1 d2fath2 d4elkb2 dlfn4b2 d2xfxb\_  
dlpg7x2 dlcqka\_ d4k71b2 d1lk2a1 dleapb2 d4lfhg2 dli4fa1 d2nw2a2  
dlkfah2 dlmhca1 dlh3ua1 dlwejh2 dlh0db2 d1a5fh2 dlkcvh2 d1mjuh2  
dlqqda1 dlkcrh2 dlk8ia1 d3huja2 d2nnab1 dlnfdf2 d3mffb2 d1s9va1  
d1lk3h2 dlq0xl2 dlfv1b1 dlneza1 d4rfeb2 d1r3ha1 d1a6tb2 dlkjva1  
dlpz5b2 dlonqa1 d2bc4a2 dlde4a1 dlk8da1 d1tcra2 d1dn0b2 d1nfde2  
d2xwtb2 dlbfoa2 d1mexh2 dliakb1 d1ypzf2 d4f7ea2 dlq72l2 d2fbjh2  
dlfe8h2 dlclzh2 dlfnqb1 dluvqa1 dlvgka1 dlcl6a1 d4j12a2 d4x99b2  
d1igtb3 dlje6a1 dlq72h2 d1nldh2 d1teth2 d2hmic2 dli1ca2 dli1ca1  
dlk8ib1 dlq0yh2 dlkfa12 d3frua1 dlpg7w2 dlu58a1 dligyb4 dligyb3  
dlhyrc1 dlklub1 dldeeb2 dlcl2b2 d2bc4b2 d2ig2h2 dlkcvl2 d3wn5b1  
d1lk2b\_ d1lk3l2 d1mjul2 d1sm3h2 dlq0xh2 dlzvsal dlydpa1 dlu8ib2  
d1ypze2 dlkcu2 d2lj7a\_ dln4na\_ d2m8bb1 d2kyqa\_ d3psma\_ dljxca\_  
d2g11a\_ dlugla\_ d4uj0a\_ d2k4ua\_ dlhp2a\_ d2lu9a\_ dlbaha\_ d2meoa1  
dlwm7a\_ dlhlya\_ dln8ma\_ dljlza\_ dlwpda\_ dlcl55a\_ dlpvza\_ dlwt7a\_  
dlwz5a\_ dlmsa\_ dlpjva\_ dlcl49a\_ dlqkya\_ d2ktca1 dlwmta\_ d1du9a\_  
dlj5ja\_ dlrlga\_ dle3oc2 dlic8a2 dlt0za\_ d2i61a\_ d1t1ta\_ d1sn4a\_  
dlkv0a\_ d2lkba\_ dlnpia\_ dlwwna\_ dlpe4a\_ d2kbka\_ d2li7a\_ d2kbha\_  
dlldq7a\_ dlsega\_ dlomya\_ dlzywa1 dljzaa\_ d2jcqa\_ dln9wa1 d1bbua1  
d1e1oa1 dlcl0aa1 dlb8aa1 d1l0wa1 d3a74a1 dliyjb4 dliyjb5 dliyjb3  
dlo7ia\_ d4ipca1 dlx3ea\_ d4apva\_ dljb7a1 dljb7a2 dljb7a3 d3kdfa\_  
dlue1b\_ dlwjja1 d3eiva\_ dlxjva2 dlxjva1 d2ccza2 dlse8a\_ d1l1oc\_  
dljb7b\_ dlqvca\_ dlqzga\_ dlmiua4 dlmiua5 dlmiua3 dly14b1 d2nn6i1  
dli94l\_ d2zjra2 dlsmxa\_ d2qamc2 dlhh2p1 d2r7da1 d1rl2a2 d1wfga1  
d3bzka4 dlx6oa2 d3a0ja\_ d2j01d2 d2ja9a1 d4ql5a\_ d1hr0w\_ d1luza\_  
d2n3sa\_ d2vnud1 dlh95a\_ dlgo3e1 d2nn6h1 dlne3a\_ d2mo1a\_ dliz6a2  
dljjga\_ dle3pa2 d2ix0a3 d2ix0a2 d2lxja\_ dlueba3 dlueba2 d2z0sa1  
d1u0la1 d2ix0a1 d2eifa2 d2je6i1 d3i2za1 d2c35b1 d2ahob2 d1t9ha1  
d3i4oa\_ d2qall1 dljt8a\_ d2nn6g1 dlg6pa\_ d3cama\_ dli94q\_ d1c9oa\_  
d1d7qa\_ d2ba0a1 d2vnud2 d2vnud3 dlkhia2 d2qalq1 dlwi5a1 d1xtda2  
d1ny4a\_ dlzka\_ d4tlja\_ d2a2ua\_ d4wfva\_ d3t1da\_ d4iaxa\_ d3zq3a\_  
d2nnda\_ dli4ua\_ dlkxoa\_ d1bbpa\_ dlkt7a\_ d1exsa\_ d3s26a1 d1lf7a\_  
dlqfta\_ d4gh7a\_ dlz24a1 dlqabe\_ dlxkia\_ dlw3a\_ d3bx7a\_ d4iawa1  
dln0sa\_ dlgkab\_ d3kzaa\_ d2k23a\_ d2l9ca1 d2joza1 dlgm6a\_ d3kffa\_  
d3saoa1 dle5pa\_ dlyupa1 dlilua\_ d2shpa1 dlyfoa\_ dl18ka\_ d2ooqa1  
dlg4us2 dlpl5a\_ dl1ara2 dl1ara1 dlwcha\_ d2fh7a2 d2fh7a1 d3azya\_  
d3wvja\_ dlupsa1 dlajoa\_ d2hyka\_ dlajka\_ d2vy0a\_ d3o5sa\_ d3d6ea\_  
d3atga\_ dlodypa\_ dlumza\_ d3i4ia\_ dlcl1a\_ d4lbqa\_ d1a78a\_ d4no4a\_

d3zsja\_ d3duia\_ d1g86a\_ d1is3a\_ d1qmja\_ d1hlca\_ d1tdha3 d1q3ba3  
d1ee8a3 d1k82a3 d3p0ya1 d1lgra1 d1lgra2 d1n8yc2 d1m6ba2 d1m6ba1  
d1lepwa1 d2h0ba\_ d2erfa\_ d1h30a1 d3mw4a1 d1pz7a\_ d2r1ba\_ d3v64a1  
d1d2sa\_ d3bopa1 d3mw3a1 d1lokqa1 d1lokqa2 d1wioa4 d1ccza2 d1vcaa1  
d1dr9a2 d1lic1a1 d2d9qb1 d2nxyb2 d2dara2 d2dara1 d1wyha2 d2dloa2  
d1rutx4 d1rutx3 d2cuqa2 d1x41a2 d1x41a1 d1x3ha2 d1x3ha1 d2d8za1  
d1x61a2 d1x6aa1 d1x6aa2 d2cora2 d2cora1 d1v6ga1 d1v6ga2 d2d8za2  
d1x64a1 d1x64a2 d1b8ta1 d2co8a1 d1x63a2 d2dj7a2 d2dj7a1 d2cu8a2  
d2cu8a1 d1g47a2 d1g47a1 d1j2oa1 d1wyha1 d2dloa1 d1wiga1 d1wiga2  
d2cupa2 d2cupa3 d1x68a1 d2d8ya2 d2d8ya1 d1m3va2 d1x62a1 d1x68a2  
d1x61a1 d1b8ta3 d1b8ta2 d2d8xa2 d2d8xa1 d1x4ka1 d1x4ka2 d2cuqa1  
d1m3va1 d2co8a2 d1j2oa2 d1x63a1 d2cura1 d2cura2 d1x62a2 d1op9a\_  
d1y01a1 d1letzb1 d1legj11 d2gsib1 d1nj9a1 d4jfhd1 d1aqk11 d1t2ja\_  
d1l1o4h1 d1zvya1 d3v4v11 d4enec1 d1kxtb\_ d5e8ea1 d2pxya\_ d4weud\_  
d1xiwc\_ d2esvd1 d1qznh\_ d1ogae1 d1f4xh1 d4n1hb\_ d3ezjb1 d3mlw11  
d1kfah1 d1letza1 d1b4jh1 d3cfic\_ d4w68a\_ d2arja1 d1ek3a\_ d2ok011  
d1vera\_ d1uwgh1 d1blnb1 d1fpth1 d1rzga1 d2giya1 d4m3kb1 d1nc2a1  
d2nyyd1 d1ncna\_ d1fbih1 d5dxwa\_ d4fqqa1 d1dqdh1 d1jfq11 d1kelh1  
d1faih1 d1frgl1 d1figl1 d4m6n11 d1fo0a\_ d4hxb11 d3b5ga\_ d3quyd1  
d2h9gb1 d1i8kb\_ d2dd8h1 d2ck0h1 d1eaja\_ d4w6wb1 d2a6ib3 d1t66d1  
d2e27h\_ d1ob1b1 d1f11b1 d2v7na1 d1ad0a1 d2xt1b1 d1pskh1 d4i13b1  
d2op411 d1a0q11 d1uwell1 d1za3a1 d1ncb11 d4uu9a\_ d1bm3h1 d1cloh1  
d1nqba2 d1cf8h1 d4y5va\_ d1mhph1 d5anma1 d4cdgc1 d4ldeb\_ d1y01b1  
d2pcpb1 d1z3gl1 d1dfb11 d1fh5h1 d3g5xa1 d1tzib1 d4dn311 d3zhka1  
d2b1hh1 d2uyla1 d1f3dh1 d1nj9b1 d2agjh1 d2h1p11 d1q72h1 d8fabb1  
d1ndmb1 d1rjca1 d4u6hb1 d3upca\_ d2fbj11 d1osph1 d1tvda\_ d2cjh\_  
d4fhbd1 d1bd2d1 d1rz7h1 d3nn8a\_ d1blna1 d1knoa1 d1nfda1 d2bmkb1  
d1dq11\_ d1lgyb1 d1lign11 d1e8h1 d3utza1 d1nc2b1 d1rihh1 d4mwfb1  
d4jvpa1 d1mieh1 d1rhfa1 d1fgn11 d1sbsh1 d1lp9e1 d1dn0a1 d4lqf11  
d1iaih1 d1kgcd1 d1mh5b1 d1gpol1 d2g60h3 d1f8t11 d2jixd1 d4grwh\_  
d1fo0b\_ d1bfob1 d1axsa1 d1u9ka\_ d1nmbh\_ d1h8na1 d1h8na2 d1jguh1  
d4eura1 d3sdy11 d35c8h1 d1w7211 d1mvub\_ d1i9rh1 d1ob1a1 d4wenb\_  
d1yeeh1 d3ietc1 d1f58h1 d1ad0b1 d1mqk1\_ d1nbvh1 d4b50a\_ d3r8bb\_  
d1baf11 d1mamh1 d4rgne1 d2gsgb\_ d35c811 d1bafh1 d1aih1 d2pcpa1  
d2fath1 d2x1pa\_ d1orsb1 d1libgl1 d1shma\_ d1a2yb\_ d1u0qa\_ d2coqa\_  
d1hilb1 d1qfwi\_ d1jv5b\_ d1fn4b1 d5e0qa\_ d1nsnh1 d1plgl1 d4ocx11  
d1kb5h1 d1rzfh1 d1pg7x1 d2fx7h1 d2oi9c\_ d1l7il1 d3eyva1 d1d5il1  
d4ffyl\_ d1tet11 d1a6wh\_ d1ac6a\_ d3dvfa\_ d1nfde1 d1mimh1 d1ri8a1  
d1jhlh\_ d3dura\_ d1fskb1 d1f97a1 d3so3b1 d2ak4d1 d1lp9f1 d4z7wf1  
d1l7th1 d4y5ya\_ d4x7ec1 d1emth1 d1ikf11 d1nlbh1 d4utal1 d1bjma1  
d1eapb1 d1u6ah1 d2dtgd1 d1kj2b\_ d1xeda1 d1c1eh1 d1fgvh\_ d2bnub1  
d2fb4h1 d2dtgb1 d1ktrh\_ d1jpth1 d1qkz11 d4hepg\_ d2atpb1 d1flrh1  
d2hrpl1 d1mvfa\_ d1iaim1 d3k80a1 d2jb5h1 d3zkxc\_ d4grwe\_ d1it9h1  
d1rhhb1 d3w9ec\_ d1e4wh1 d1sy6h1 d2j6eh1 d3qxta\_ d1jglh1 d1p7ka1

d1tzhb1 d4n8pa1 d1gaf11 d2jelh1 d1wioa2 d4i0cc1 d1cicb1 d1lmka2  
d1lmka1 d1liqwh1 d1lorqb1 d1lejoh1 d1jnlh1 d4zgl1\_ d43c9b\_ d1ggbl1  
d1wejh1 d3q6fa1 d1f3dj1 d3c6la1 d1bqlh1 d3p9wb\_ d1a3r11 d1h0db1  
d2uzil\_ d1eo811 d1qfwl\_ d1n7ml1 d1igja1 d1c5ch1 d2a9mh\_ d1rmfh1  
d1fj1b1 d4heme\_ d1ccza1 d1a5fh1 d1ogad1 d1dlfh\_ d1qa9b\_ d1vgel1  
d3qskb\_ d1sjxa\_ d4ozfg1 d1sq2n\_ d1qd0a\_ d1kcvh1 d1c5db1 d3qcul1  
d8faba1 d3bn9d1 d1mjuh1 d4y8dc\_ d7fabh1 d3dvgb1 d1l0011 d1a6tb1  
d1gigh1 d1kcrh1 d2hwz11 d1yjdc1 d3clf11 d4krna\_ d1d171\_ d1e6o11  
d1mexh1 d3r0ma\_ d4kkna\_ d1fnsl1 d1loaqh\_ d1rzia1 d1ucbh1 d1ncw11  
d4b41a\_ d1nfdfl1 d2mpah1 d2d7t11 d4grwf\_ d4b5ea\_ d1lk3h1 d3u79a\_  
d4u3xa\_ d1ghfl1 d1bvkb\_ d1mcww1 d1b88a\_ d1jrhh1 d32c2b1 d4wemb\_  
d1dsfh\_ d1op3h1 d1cell1 d1liqda1 d1qoka1 d1qoka2 d1qfuh1 d2crya1  
d1ay1h1 d1loaq1\_ d3ab0b\_ d1rurl1 d1t4kb1 d1bz7b1 d1n0xh1 d1for11  
d1ucb11 d4w6yb\_ d43c9a\_ d2aabl1 d1tzia1 d4n1ca\_ d1k6qh1 d3g9ab\_  
d4tvsa1 d1igmh\_ d1pz5b1 d3dx9a1 d3wxwh\_ d1nakh1 d1kcul1 d3eaka\_  
d4qlra1 d1cr911 d1d9ka\_ d1f4x11 d1deea1 d2i27n2 d1c12a1 d2orbl1  
d1j8hd1 d1mcph1 d1c5da1 d1kenh1 d1bd2e1 d1h5ba\_ d4x7fc1 d3upaa\_  
d1t3fa1 d1lindh1 d2dtgc1 d4hc111 d1zv5a1 d4wgvb\_ d1uwgl1 d4f37k1  
d1aqkh1 d1vesa\_ d3zkqd\_ d1fpt11 d1l0411 d1knob1 d3rrqa\_ d1ct8b1  
d4orz\_ d1mlbb1 d4hgkc1 d1dqdl1 d1bogb1 d4ozhe1 d1dr9a1 d1i7za1  
d1dn0b1 d1kell1 d1rzib1 d1ypzf1 d1wtla\_ d1hkfa\_ d1fail1 d1figh1  
d2vyre\_ d1sjva\_ d1ohqa\_ d1bfoa1 d1pkqb1 d1mjul1 d1b4j11 d1nsn11  
d2arjb1 d1p4bh\_ d4aj0a\_ d3nn8b\_ d2rcja1 d1f2xk\_ d4v1dd\_ d1adqh1  
d2eksa\_ d4k3ga\_ d1jfqh1 d1luweh1 d1frgh1 d4gftb\_ d1uz8b1 d4n1ea\_  
d1bm311 d1cl011 d3mcka1 d2vq1a1 d1ae6h1 d4aq1b1 d1uj3b1 d1nbqa1  
d1fh511 d2ck011 d2ywza\_ d1q7211 d4nxbx\_ d1hila1 d4hz1b1 d2j8811  
d1zmya1 d1cd0a\_ d1a4ka1 d1psk11 d1a0qh1 d4krmb\_ d1ncbh1 d2fbjh1  
d1j8he1 d1i3ua\_ d1cf811 d1fe8h1 d2plya1 d1eeqa\_ d2x89a\_ d1o10a\_  
d2r0lh1 d1ub5a1 d1dfbh1 d3eyvb1 d4jdvb1 d4p2cg\_ d2gsia1 d2agj11  
d1u3ha1 d2h1ph1 d1rih11 d1fskc1 d1boga1 d2a7711 d1osp11 d1qfoa\_  
d3dwta\_ d2fx711 d1rz711 d3stba1 d1pkqa1 d1b6da1 d1dzba2 d1dzba1  
d1kj2a\_ d4l1ha\_ d1rzgb1 d1dq1h\_ d12e811 d1miel1 d1jmaa\_ d1sbs11  
d1fgnh1 d1f5811 d1mqkh\_ d1ndgb1 d3qegl1 d1ia111 d2aw2a1 d1tqbc1  
d3fo2a1 d4dkaa\_ d1f8th1 d2g6011 d2ywy\_ d1uj3a1 d1yc7a\_ d3bd3a\_  
d4w6xb1 d1nmb1\_ d1i8ka\_ d1rj1b1 d1ypze1 d1p7kb1 d1kxqe\_ d1gpoh1  
d2z4qa1 d1w72h1 d1i9r11 d4qgya1 d4xt1c\_ d2qqnh1 d1cica1 d3c08h1  
d2cd0a\_ d2bdnh1 d1hnga1 d1mam11 d1nldh1 d1cr9h1 d4lcih1 d3bkyh1  
d3qg711 d1ai111 d1kxvc\_ d4iosd\_ d1l7ih1 d2x1qa\_ d1ub6b1 d3k74b\_  
d1libgh1 d1teth1 d1igya1 d1hxma1 d2x6ma\_ d2e71a\_ d5e03a\_ d1qfwm\_  
d2r0kh1 d1igjb1 d1rurh1 d1plgh1 d1mj8h1 d1yuhb1 d3fmg11 d1rzfl1  
d1emt11 d1ad9b1 d1igtb1 d1nlb11 d1d5ih1 d3k7ua\_ d4ffyh\_ d1bwwa\_  
d3dvga1 d1a6ta1 d1fgvl\_ d4qxgl1 d1mim11 d1jh11\_ d2hffb1 d2hh011  
d1qkzh1 d1l7t11 d1afvh1 d1iaii1 d2cjuh\_ d1um5h1 d2ghwb2 d2ghwb1  
d1kgce1 d2fgwh1 d1ikfh1 d1dvfd\_ d2i24n1 d2xtjb\_ d1za3b1 d2yc1a\_

d2hh0h1 d2x1oa\_ d1bvka\_ d1rjla1 d5e7ba1 d1igta1 dlil1b1 d2fb4l1  
d1mvua\_ d1jptl1 d32c2a1 d1fvca\_ d1iqdb1 d2hrph1 d2p4ab\_ d4qola\_  
d1p2cb1 d1wt5c\_ d1t4ka1 d5c1mb\_ d1it9l1 d1bz7a1 d1b2wh1 d1e4wl1  
d1jnl11 d1yedb1 d1za6b1 d3u7aa\_ d1igfh1 d3gnml1 dlorsa1 d1wejl1  
d1a2ya\_ d1hxmb1 d1gafh1 d2j4wh1 d1pz5a1 d1j05a\_ d1a3rh1 d4fqll1  
d1qfwh\_ d1eo8h1 d1n7mh1 d4s11a\_ d1kegh1 d5da4a\_ d1iqwl1 d3whxb1  
d1vgeh1 d1deeb1 d1c12b1 d1t2ql1 d1ad9a1 d3gsnb1 d3b2uc1 d1ggbh1  
d1t3fb1 d1nakl1 d4ocmc\_ d1lila1 d2v7hb3 d2esve1 d1mcoh1 d2qr0b1  
d2q3aa\_ d1ct8a1 d1kcr11 d2pxyb\_ d2uzih\_ d5c3ld\_ d3durb\_ d1c5cl1  
d2ak4e1 d1dl7h\_ d1xiwd\_ d1mlba1 d1rmfl1 d1i7zb1 d1dlfl\_ d2xa3a\_  
d5bq7b1 d1dqqb1 d3h42l1 d1egjh1 d1kcvl1 d1fe8l1 d2j6el1 d1f3rb2  
d1lk3l1 d1sm3h1 d1q0xh1 d1ghfh1 d7fabl1 d1igch1 dllo0h1 d4idla\_  
d5c2bl\_ d1jrh11 d1il1a1 d3zhda1 d4kfzc\_ d1b0wa\_ d1e6oh1 d1mexl1  
d4krpb\_ d1fnsh1 d1ncwh1 d4hgma\_ d4eigb1 d4rzca\_ d2mpal1 d4y5xa\_  
d5en2b1 d3lrga1 d4ej1c1 d1rhha1 d1j05b\_ d1forh1 d1q9wb1 d2wzpd\_  
d2aq2a1 d1h0da1 d3revb1 d2ij0c1 d1tzh1 d4m7jl1 d1k6ql1 d3b9kc1  
d1igml\_ d3qeua1 d1dsfl\_ d1celh1 d1kcuh1 d1zvha1 d1zvoa1 d1tqbb1  
d1ay1l1 d2qscl1 d2cgrh1 d1nl0h1 d1kenl1 d3eo0a1 d4n9ob1 d1n0xl1  
d3k1kc\_ d2m9wa1 d3dfxa\_ d2aq2b1 d1ck1a1 d1enfa1 d1i4pa1 d1v1oa1  
d1et9a1 d1esfa1 d2g9hd1 d4ohja1 d1klud1 d1bxta1 d1eu3a1 d1ty0a1  
d1fnua1 d2cqva1 d1fhga\_ d2k1ma\_ d2d12a1 d1biha3 d1biha1 d1biha4  
d3qp3a1 d1g1ca\_ d1gxea\_ d1cvsc2 d1cvsc1 d1xmwa2 d1m4ka2 d2otpa2  
d1biha2 d1rhfa2 d2fcba2 d2fcba1 d1wwbx\_ d1gsma2 d1lepfa1 d1lepfa2  
d2dava1 d1waaa\_ d1f97a2 d1x44a1 d1vcaa2 d1fnla2 d1fnla1 d3b5ha2  
d3h8na2 d3h8na1 d1jbja1 d1jbja2 d1pd6a\_ d1f2qa2 d1f2qa1 d3cx2a\_  
d1nbqa2 d3b5ha1 d1n26a1 d1xiwb\_ d1xaua\_ d1fltx\_ d2ifga1 d1olla1  
d1olla2 d1cs6a4 d1cs6a3 d1cs6a2 d1cs6a1 d2gw5a2 d1sy6a1 d1xiwa\_  
d1lucta2 d1lucta1 d1ry7b2 d1gl4b\_ d1qz1a3 d1olza1 d2c9aa1 d1wwca\_

**Family-68 (c.45.1.2)**

**Positive dataset contains 4 protein sequences.**

d2ooqa1 d1wcha\_ d2fh7a2 d2fh7a1

**Negative dataset contains 4110 protein sequences.**

d1m32a\_ d1libja\_ d1c7na\_ d1liuga\_ d4q75a\_ d2bkwa1 d1t3ia\_ d1n8pa\_  
d1qz9a\_ d1jff9a\_ d1leg5a\_ d1p3wa\_ d3kgwa\_ d1cl1a\_ d2ctza1 d1vjoa\_  
d2rfva\_ d1gc0a\_ d1cs1a\_ d1d2fa\_ d2ch1a1 d1qgna\_ d1pffa\_ d1elua\_  
d1ax4a\_ d2v1pa1 d2ez1a\_ d1u08a\_ d1lc5a\_ d1b5pa\_ d2ay1a\_ d1bw0a\_  
d3pd6a\_ d7aata\_ d2csta\_ d1j32a\_ d1fg7a\_ d4wlha\_ d1o4sa\_ d1v2da\_  
d1gdea\_ d1m6sa\_ d1v72a1 d1svva\_ d1wsta1 d2f8ja2 d1lk9a\_ d1vp4a1  
d1xi9a1 d2gb3a1 d1yaaa\_ d1xkla\_ d2wfla\_ d1xkta1 d2hfka\_ d1jmkc\_  
d5d3ka\_ d1sefa\_ d1sfna\_ d1sq4a\_ d1ddla\_ d1e57b\_ d1auyb\_ d1dzka\_  
d4tlja\_ d2a2ua\_ d4wfva\_ d3t1da\_ d4iaxa\_ d3zq3a\_ d2nnda\_ d1i4ua\_  
d1kxoa\_ d1bbpa\_ d1kt7a\_ d1exsa\_ d3s26a1 d1lf7a\_ d1qfta\_ d4gh7a\_  
d1z24a1 d1qabe\_ d1xkia\_ d3bx7a\_ d4iawa1 d1n0sa\_ d1gkab\_ d3kzaa\_  
d2k23a\_ d2l9ca1 d2joza1 d1gm6a\_ d3kffa\_ d3saoa1 d1e5pa\_ d1yupa1

dliiua\_ d3ljqa\_ g1k2x.1 d3ehbb1 dlfftb1 d1gyca3 dlhfua2 d1kbva1  
d1kbva2 d1sdda1 d1sdda2 d1gyca1 d1gyca2 d1mzya1 d2bw4a1 dlaoza1  
dlaoza3 dlaoza2 d1kyaa2 d1kyaa3 d1kyaa1 d1mzya2 d4e9sa1 d1sddb1  
d1sddb2 dlhfua1 dlhfua3 d1oe1a1 d1v10a2 d1v10a3 d1v10a1 d2dara2  
d2dara1 dlwyha2 d2dloa2 d1rutx4 d1rutx3 d2cuqa2 d1x4la2 d1x4la1  
d1x3ha2 d1x3ha1 d2d8za1 d1x61a2 d1x6aa1 d1x6aa2 d2cora2 d2cora1  
d1v6ga1 d1v6ga2 d2d8za2 d1x64a1 d1x64a2 d1b8ta1 d2co8a1 d1x63a2  
d2dj7a2 d2dj7a1 d2cu8a2 d2cu8a1 d1g47a2 d1j2oa1 d1wyha1 d2dloa1  
d1wiga1 d1wiga2 d2cupa2 d2cupa3 d1x68a1 d2d8ya2 d2d8ya1 d1m3va2  
d1x62a1 d1x68a2 d1x61a1 d1b8ta3 d1b8ta2 d2d8xa2 d2d8xa1 d1x4ka1  
d1x4ka2 d2cuqa1 d1m3va1 d2co8a2 d1j2oa2 d1x63a1 d2cura1 d2cura2  
d1x62a2 d2cfba1 d1dfoa\_ d1o69a\_ d1bj4a\_ d3k28a\_ d2bwpa\_ d3lg0a\_  
d2fnua\_ d3ou5a\_ d1z7da1 d1b9ha\_ d1iaya\_ d4msoa\_ d1bs0a\_ d1s0aa\_  
d1sffa\_ d3tqxa\_ d1mdoa\_ d3qboa\_ d3pgya\_ d1bjna\_ d2dkja\_ d1ejia\_  
d1vefa1 d4wxga\_ d3bs8a\_ d3gbxa1 d1w23a\_ g1gk9.1 g1or0.1 gle3a.1  
d1a3qa1 d1iknc\_ d3brda1 d1p7h11 d1imhc1 d1gjia1 d1zk9a1 d2cxka1  
d2h0va\_ d1zx5a1 d2phla2 d2phla1 d1fxza2 d1fxza1 d1lra\_ dluija1  
g1dgw.1 d2v09a\_ d1uika2 d1uika1 d1dgwa\_ d1ep0a\_ d2pa7a1 d1wlta1  
d2c0za1 d1ds6b\_ d1fstb\_ d1g0da1 d1ju8a\_ d4alac\_ d1rera1 d1s6na\_  
d3uzqb\_ d1tafa\_ d1bh9b\_ d1tafb\_ d1jfib\_ d1q9ca\_ d1h3ob\_ d2byka1  
d1n1ja\_ d4g92b\_ d1bh9a\_ d1h3oa\_ d2bykb1 d1n1jb\_ d1ydw2 d2nvwa2  
d1h6da2 d1zh8a2 d1xeea2 d1tlta2 d1r0ka3 d1j5pa3 d1vkoa2 d1vm6a2  
d3qvsa2 d1gr0a2 d1p1ja2 d2ovga\_ d1sq8a\_ d1rzsa\_ d3kz3a\_ d3orca\_  
d3gpdg2 d2q49a2 d1hdgo2 d2g17a2 d2cvoa2 d2czca1 d3pwka2 d1obfo2  
d1i32a2 d1zyao2 d2pkqo2 d1b7go2 d2hjsa2 d1cf2o2 d1vkna2 d1nvmb2  
d41t9a1 d3tc7a1 d3hoja\_ d1i4na\_ d3vnda\_ d3nl8a1 d1geqa\_ d3naval  
d1v5xa\_ d4a2ra1 d3tc6a1 d1ujpa\_ d4ijba\_ d1xcfa\_ d1vc4a\_ d1rd5a\_  
d1qopa\_ d3b5va\_ d2msya\_ d2djoa1 d2r5za\_ d1au7a1 d1f43a\_ d2lmda1  
d1akhb\_ d1s7ea1 d3nara\_ d1zq3p1 d2craa1 d1mija\_ d4uuta\_ d3a01a\_  
d1x58a1 d3rkqa1 d3cmya1 d2cqxa1 d2da6a1 d1e3oc1 d1fjla\_ d1mh3a1  
d1x41a1 d1wh7a1 d1gt0c1 d2mw8a\_ d1lfup\_ d1x2ma1 d1b72a\_ d1wi3a1  
d1jgga\_ d1wjha1 d1x2na1 d1mnm\_ d2cuea1 d3k2aa\_ d2hosa\_ d2jwta2  
d1pufa\_ d1octc1 d2hi3a\_ d1b8ia\_ d4j19a\_ d3lnqa\_ d1wh5a1 d1b8ib\_  
d1fexa\_ d2cqra1 d1guua\_ d1ug2a1 d2cqqa1 d2ajea1 d4a69c\_ d1h8ac1  
d2crga1 d2iw5b1 d1xc5a1 d1ofcx1 d2cu7a1 d1wgxa1 d2cjja1 d2ckxa1  
d6paxa2 d1k78a1 d1k78a2 d1hlva1 d1hlva2 d1iufa2 d1ligna1 d1bl0a1  
d1bl0a2 d1d5ya1 d3lv8a\_ d1s3ga1 d1zaka1 d1s4qa\_ d3tvta2 d1uf9a\_  
d1khta\_ d1ckea\_ d1losna\_ d1p5zb\_ d4tmka\_ d3cm0a\_ d1tmka\_ d1jaga\_  
d3h86a\_ d1t0hb\_ d1nn5a\_ d2h92a\_ d3kb2a1 d2c95a1 d1yj5a2 d1kgda\_  
d1ly1a\_ d1vyva2 d1deka\_ d2grja1 d1p3ja1 d1y63a\_ d1e4ya1 d1s96a\_  
d3iija1 d1lvga\_ d1nksa\_ d1vyua2 d4e22a\_ d1qf9a\_ d1jjva\_ d1q3ta\_  
d1ki9a\_ d1lw7a2 d1teva\_ d1kjwa2 d1gsia\_ d2xlba\_ d3m83a1 d1g3ma\_  
d1j99a\_ d1t8ta1 d1nsta\_ d1fmja\_ d1zrha\_ d1ls6a\_ d2a3ra\_ d1laqua\_  
d2zptx\_ d3ckla\_ d1teta\_ d1q44a\_ d2gwha\_ d1odfa\_ d4gi7a\_ d2jeoa1

d1rz3a\_ d1k6ma1 d1z0ja1 d3umra2 d3gj0a1 d2gaoa1 d1yzga1 d1x3sa1  
d1g7sa4 d1puja\_ d1udxa2 d1kk1a3 d2o52a\_ d1jwyb\_ d1zcaa2 d1zcba2  
d2fv8a1 d2cjwa\_ d3dz8a1 d1xzpa2 d1vg8a\_ d4qxaa\_ d2ew1a1 d1x1ra1  
d2bcgy\_ d3doea1 d3cona\_ d3rega\_ d3wyga\_ d1upta\_ d2b6ha1 d1zd9a1  
d1lnza2 d1r5ba3 d1n0ua2 d1r2qa\_ d2f91a1 d2rhda\_ d3q3jb\_ d3q85a\_  
d1efma1 d1r8qa\_ d2gf9a1 d2akab1 d1ek0a\_ d1z08a1 d2gcoa1 d2dy1a2  
d4g01b\_ d2cxxa1 d1svia\_ d3q72a\_ d1ni3a1 d4ac9a4 d2erxa1 d2bmea\_  
d1wxqa1 d2gf0a1 d41dja1 d1zunb3 d1d5ca\_ d4lv5b\_ d1efca3 d1kmqa\_  
d2g6ba1 d3lrpa\_ d1tada2 d2y8ea\_ d4rd4a1 d1z06a1 d2heia\_ d3a58b\_  
d1u01a2 d1d2ea3 d1zj6a1 d2ocba\_ d3rwoa\_ d1mr3f\_ d2e9sa1 d4u5xa1  
d2iwra\_ d2fn4a1 d3bwdd\_ d2nzja1 d2atva1 d2ksqa\_ d3l43a\_ d1mkya2  
d1mkya1 d1wmsa\_ d1jn3a3 d2rmka\_ d1f6ba\_ d1f60a3 d1gota2 d1jala1  
d2fh5b1 d1g16a\_ d2wblc\_ d1m7ba\_ d1wf3a1 d1t9ha2 d1z6xa1 d1z0aa1  
d2fg5a1 d2a5ja1 d2bcjq2 d1s0ua3 d1ky3a\_ d4y0va\_ d4lhwa\_ d2qmea1  
d2atxa1 d1egaa1 d1ryha\_ d1moza\_ d1nrjb\_ d2erya1 d3bfka\_ d1puia\_  
d1fzqa\_ d3j3az1 d3t5ga\_ d1shza2 d3defa\_ d2f7sa1 d3raba\_ d3tsoa\_  
d3aq4a\_ d2a17a1 d3sfva1 d3bc1a\_ d2ncda\_ d1sdma\_ d3h4sa1 d2heha\_  
d2grya\_ g3kin.1 d1br2a2 d1goja\_ d1f9va\_ d2mysa2 d1lkxa\_ d3t0qa\_  
d4db1a1 d3gbja\_ d1ry6a\_ d1v8ka\_ d1s5ja2 d1qhta2 d4dlea2 d1tgoa2  
d3py8a2 d1q8ia2 d2py5a2 d1d5aa2 d1jmx1 d1pbya1 d1pbya2 d3vrda1  
d3vrda2 d1fcdc2 d1h1oa2 d1h1oa1 d1m70a2 d1m70a1 d1iqca1 d1eb7a2  
d1eb7a1 d1nmla2 d1nmla1 d1zc6a1 d1zbsa1 d1zbsa2 d1zc6a2 d2ch5a2  
d2ch5a1 d1zxo2a d1zxo1a d2d0oa3 d2d0oa2 d1nbwa2 d1js9c\_ d1f15b\_  
d1za7a\_ d1laja\_ d2nqya\_ d1h4ga\_ d1hixa\_ d1oa2a\_ d3b7ma\_ d4h7ma1  
d3wp3a\_ d2vgda\_ d1lgoa\_ d3zsea\_ d2nlra\_ d3wx5a\_ d1oa3a\_ d1pvxa\_  
d1m4wa\_ d1f5ja\_ d1oa4a\_ d1ks5a\_ d4ix1a1 d1qnia1 d1libya\_ d1levsa\_  
d1cnt1\_ d1pvhb\_ d1z7ca\_ d1huwa\_ d1bgea\_ d1rhga\_ d1f6fa\_ d1f45b\_  
d1i1rb\_ d1letea\_ d3tgxb\_ d1scfa\_ d2z3qa1 d3qb1a\_ d1hula\_ d1m48a\_  
d4nkqb\_ d1v7mv\_ d5e4ea\_ d2o27a\_ d3b5ka\_ d2psma1 d4zf7a\_ d3uf5a\_  
d4x51a\_ d1d9ca\_ d4ypgc1 d3oq3a\_ d1lqsl\_ d1n1fa\_ d1aula\_ d1wu3i\_  
d3bes1\_ d3ux9a\_ d2b71a\_ d3rbaa\_ d2qtra\_ d1nupa\_ d3l92a\_ d1f9aa\_  
d1qjca\_ d2h29a\_ d1vlha\_ d1lw7a1 d1mrza2 d4ruka\_ d2e17a\_ d1iq0a2  
d1irxa2 d1r6ta2 d1liva4 d2cyba\_ d1rqga2 d1j09a2 d2yxna\_ d1f7ua2  
d1h3fa1 d1ffya3 d2g36a1 d1jila\_ d1n3la\_ d1i6la\_ d1pfva2 d1h3na3  
d3n9ia\_ d3sz3a1 d3sw2a\_ d1moxc\_ d1dx5i3 d1edmb\_ d1autl2 d1autl1  
d1nqlb\_ d1dval1 d1szba2 d1kigl\_ d2y5f1\_ d1ijqa2 d1gk5a\_ d1g1sa2  
d1nt0a3 d1xdtr\_ d1lmja2 d1lmja1 d1nzia2 d2wphe\_ d1klil\_ d1pfxl2  
d1pfxl1 d1p9ja\_ d1g1ta2 d1f7ea\_ d4yzub\_ d2mgpa1 d1b9wa1 d1b9wa2  
d2mgpa2 d1obl1c1 d1n1ia2 d1n1ia1 d2npra2 d2npra1 d1m1xb5 d1f56a\_  
d1bypa\_ d1azca\_ d1ws8a\_ d3u25a\_ d1cuoa\_ d1id2a\_ d1rkra\_ d2iaac\_  
d4dp1x\_ d1nwpa\_ d2gima\_ d2i7sa\_ d1qhqa\_ d1qx2a\_ d2y5ia\_ d1qlsa\_  
d1psra\_ d3n22a\_ d2egda\_ d4ggfc\_ d2wcea\_ d2luca\_ d4aqia\_ d3nsia\_  
d2lp3a\_ d1j55a\_ d1a4pa\_ d1nsha\_ d1pvaa\_ d3fs7a\_ d2pvba\_ d1ttxa\_  
d1rwya\_ d2kyfa\_ d1rk9a\_ d1a75a\_ d1lexra\_ d1tiza1 d1nyaa\_ d1g8ia\_



d1ggwa\_ d1wdcc\_ d3fwba\_ d1ggza\_ d2o5ga\_ d1ctaa\_ d1m45a\_ d3i5gc\_  
d1s18a\_ d1fpwa\_ d2scpa\_ d2roaa\_ d4aqra\_ d3pn7b\_ d1br1b\_ d2mysb\_  
d1s6ca\_ d1bjfa\_ d2obha\_ d1jfka\_ d1jf0a\_ d1qv0a\_ d11kja\_ d2mlfc\_  
d2m97a\_ d2d8na\_ d4by5a\_ d1jbaa\_ d4nqga\_ d1wdcb\_ d2mysc\_ d1j7qa\_  
d1s6ia\_ d1uhka2 d1r2ua\_ d1dtla\_ d3kf9a\_ d3pn7c\_ d1gjya\_ d1y1xa\_  
d1hqva\_ d1dvia\_ d1df0a1 d1qxp2 d4usla\_ d1k94a\_ d2w0pa\_ d2diaa1  
d2e9ia2 d2e9ja1 d2dj4a1 d2eeba1 d2diba1 d2dmba1 d2dmca1 d2d7oa1  
d2ee6a1 d2d7pa1 d2eeaa1 d2di8a1 d1wlha1 d2d7na1 d2nqca\_ d2d7ma1  
d2dica1 d3cnka\_ d2k3ta1 d2eeca1 d1qfha1 d2bp3a1 d1v05a\_ d2ee9a1  
d2eeda1 d2di9a1 d1jfxa\_ d1wkya2 d1uuqa\_ d3wh9a\_ d4mlra\_ d1xyza\_  
d4xuya\_ d2je8a5 d4bf7a1 d3cuia\_ d1ur4a\_ d1qw9a2 d1lodza\_ d2vzsa5  
d1bqca\_ d2x2ya1 d1qnra\_ d4y7ea1 d1vjza\_ d4k68a\_ d2v3ga\_ d4hpga\_  
d1nofa2 d1nq6a\_ d1h4pa\_ d1aq0a\_ d3ziza\_ d4bs0a\_ d1ecea\_ d1h1na\_  
d1ta3b\_ d1w91a2 d1i1wa\_ d1uhva2 d1us3a2 d1legza\_ d7a3ha\_ d1tvna1  
d3nyda1 d1ghsa\_ d2cyga1 d4xv0a\_ d2c8na2 d1w32a\_ d3emca\_ d1v6ya1  
d1foba\_ d2uwfa1 d2fgla\_ d3niya1 d2c0ha1 d1rh9a1 d1yq2a5 d1szna2  
d1fa2a\_ d1pama4 d5do8a1 d1ea9c3 d2fhfa5 d1qhoa4 d1avaa2 d1m53a2  
d4m8ua1 d2gjpa2 d1lwha2 d4howa1 d1ktba2 d1j0ha3 d3vm5a1 d2x1ia\_  
d1wzaa2 d1uasa2 d2diea1 d1mxga2 d1ht6a2 d1eswa\_ d1iv8a2 d5cpsa\_  
d1ud2a2 d1zjaa1 d3gbea1 d1kwga2 d1wdpa\_ d1gcya2 d1g5aa2 d1hvxa2  
d3dhp2a2 d2bhua3 d4do4a1 d3qgva1 d1e43a2 d1g94a2 d2d3na2 d1gjwa2  
d1gvia3 d1x1na1 d1r7aa2 d1tz7a1 d4c7ga2 d2gjxa1 d1nowa1 d1yhta1  
d4toqa\_ d1wb0a1 d1w9pa1 d1itxa1 d1kfw1 d1goia2 d1ledqa2 d2gsja\_  
d1hjxa1 d1jnda1 d1vf8a1 d3wdpp1 d3wq5a\_ d4gxp2a\_ d4hz8a\_ d1e4mm\_  
d3aiua\_ d1wcga1 d1qvba\_ d3ahxa\_ d1v02a\_ d2dga\_ d1pbga\_ d1vffa1  
d1qoxa\_ d4ha4a\_ d1mixa2 d1e5wa2 d1j19a2 d1isna2 d2a16b2 d1id1a\_  
d2hmta\_ d1lssa\_ d1iuka\_ d2csua1 d3q9ub\_ d2yv1a1 d3q9na\_ d2d59a\_  
d2yv2a1 d1euca1 d1y81a1 d1wgqa1 d1v89a1 d2coda1 d1zc3b\_ d1wg7a1  
d1u5ea1 d1v61a1 d2coca1 d2ys1a1 d1v5pa1 d1ntya2 d1wjma1 d1wila1  
d1u29a\_ d1xx0a1 d1unqa\_ d2zkmx3 d1fhoa\_ d1v88a1 d2adza1 d1x1fa1  
d1p6sa\_ d2coaa1 d1btka\_ d1v5ma1 d1faoa\_ d2x18a\_ d1x1ga1 d4kaxb\_  
d2j59m1 d1kilb2 d1xcga2 d1txda2 d1u5da1 d1dbha2 d1wlha\_ d1upqa\_  
d1v5ua1 d1foea2 d2fjla1 d1eaza\_ d2dfka2 d2cofa1 d1kz7a2 d1h6ta1  
d1h6ua1 d9l1da1 d2ewda3 d1up7a1 d2dfda1 d1s6ya1 d1vjta1 d7mdha1  
d1hyea1 d1t2da1 d1oj3a3 d1b8pa1 d1ldna1 d1hyha1 d1civa1 d2a92a1  
d1ez4a1 d1i0za1 d1y6ja1 d1gv0a1 d1ur5a1 d1ll1da1 d1lobba1 d1v8ba1  
d1gdha1 d2dlda1 d1mx3a1 d1ygya1 d1qp8a1 d1li4a1 d1j4aa1 d2naca1  
d1txga2 d3f47a1 d1mv8a2 d2pv7a2 d1xc2a3 d2ahra2 d4xiya1 d2f1ka2  
d1i36a2 d1np3a2 d1lj8a4 d1teaa3 d1qmg2a2 d2i76a2 d2g5ca2 d1wdka3  
d1dlja2 d3cuma3 d1kola2 d1f8fa2 d1qora2 d1jqba2 d1vj0a2 d1cdoa2  
d1gu7a2 d1d1ta2 d1xa0a2 d2dm6a2 d1jvba2 d1rjwa2 d1llua2 d1tt7a2  
d1piwa2 d1o89a2 d1iz0a2 d1e3ja2 d1yb5a2 d1uufa2 d1vj1a2 d1e3ia2  
d3gpdg1 d1vc2a1 d2nvw1a1 d1u8fo1 d1ydw1a1 d1hdgo1 d2g17a1 d1cf2o1  
d2czca2 d1r0ka2 d1lobfo1 d2cvoa1 d1ebfa1 d1h6da1 d1i32a1 d1zh8a1

d2q49a1 d1qkia1 d1j5pa4 d3pzra1 d1xeea1 d1vkoa1 d1vm6a3 d3qvsa1  
d2pkqo1 d1b7go1 d1gr0a1 d1p1ja1 d1lc0a1 d1j0xo1 d3pwka1 d2hjsa1  
d1zyao1 d1vkna1 d1t1ta1 d1nvmb1 d3sjua\_ d3ojfa1 d1xu9a1 d2jjya1  
d1n7ha\_ d1y1pa1 d1h5qa\_ d1jtv\_ d4fs3a\_ d2bkaa1 d1gy8a\_ d2c5aa1  
d1ulsa\_ d1ooea\_ d2b69a1 d1y5ma1 d1spxa\_ d1ae1a\_ d1bxka\_ d1ydea1  
d1gega\_ d1hdoa\_ d1o5ia\_ d1e6ua\_ d1snya1 d2rhca\_ d3zv4a\_ d5ceja\_  
d2d1ya1 d1fjha\_ d3w8ea\_ d2fmua1 d1x1ta\_ d1rpna\_ d3ay7a1 d1k2wa\_  
d1eq2a\_ d2hrba1 d3ruaa\_ d2ew8a1 d4hwka\_ d1xgka\_ d2bd0a1 d1yo6a1  
d2a35a1 d2ntva\_ d1v18a\_ d1hdca\_ d4bkua\_ d2ag5a1 d2q45a\_ d1nffa\_  
d4iy1a\_ d1zbqa1 d1kewa\_ d1ek6a\_ d1ja9a\_ d2q46a2 d1iy8a\_ d1cyda\_  
d2ptga\_ d1hxha\_ d1uzma1 d3lyla\_ d4m89a\_ d3wyea\_ d2b11a1 d1w6ua\_  
d1sb8a\_ d2q2va\_ d4nr0a\_ d1e6wa\_ d2gasa\_ d3oiga1 d2bgka1 d1mxha\_  
d1v10a1 d1rkxa\_ d1r6da\_ d1wmaa1 d1e7wa\_ d2c07a1 d1xkqa\_ d3tzha\_  
d1g0oa\_ d3lz6a\_ d1qyca\_ d1ledoa\_ d1gz6a\_ d1oc2a\_ d1t2aa\_ d1zema1  
d2xoxa\_ d1z45a2 d1geea\_ d1p33a\_ d3lt0a\_ d4e6pa\_ d2wyua\_ d1db3a\_  
d4q9na\_ d1xhla\_ d4o1ma\_ d1fmca\_ d2uvda\_ d2gdza1 d1uaya\_ d2z1ma\_  
d2o23a2 d2fr1a2 d2fr1a1 d1qsga\_ d1qyda\_ d4zjua\_ d2a4ka1 d1ybl\_ a\_  
d1wvga1 d1yxma1 d3f4ba\_ d1mg5a\_ d1xg5a1 d1r55a1 d3gboa\_ d1atla\_  
d1kufa\_ d4q11a\_ d1quaa\_ d1yp1a\_ d1wnia\_ d2gfoa1 d1vjva\_ d2ayna1  
d3nhea\_ d4ekfa\_ d2ckga\_ d1th0a\_ d2bkra\_ d1ex0a4 d1g0da4 d2f4ma1  
d1x3za\_ d3ulra1 d1g9ka2 d1k7ia2 d3ioqa\_ d1fh0a\_ d1o0ea\_ d1khqa\_  
d1m6da\_ d2cb5a\_ g8pch.1 d1s4va\_ d2pnsa\_ d1vsna1 d1mira\_ d1iwda\_  
d2oula\_ d7pcka\_ d3bwka\_ d3bcna\_ d2p86a\_ d1pvja\_ d1pcia\_ d1gece\_  
d1deua\_ d4bs6a\_ d1xkga1 d1cqda\_ d1jqpa2 d2c0ya\_ d2bdza\_ d3p5ua\_  
d2o36a\_ d1k9xa\_ d1zoya1 d1qo8a2 d1d4ca2 d1chua2 d1jnra2 d2jk6a2  
d2jk6a1 d1fecal d1feca2 d1lpfa1 d1lpfa2 d1xhca1 d1xhca2 d1dxla2  
d1dxla1 d1gera2 d1m6ia2 d1onfa1 d1onfa2 d3lada2 d3lada1 d1w4xa1  
d1w4xa2 d1gesa2 d1mo9a1 d1xdia1 d1fl2a2 d1fl2a1 d1fcda1 d1fcda2  
d1h6va2 d1h6va1 d1mo9a2 d1gv4a2 d1gv4a1 d2gv8a2 d2gv8a1 d1aoga1  
d1aoga2 d1hyua1 d1ebda1 d1ebda2 d3dk9a1 d1q1ra2 d1q1ra1 d1zbfal  
d2z1ha\_ d2etja1 d3qioa1 d1j11a\_ d2e41a\_ d1j12a\_ d21sna1 d1uaxa\_  
d2yv0x\_ d1mu2a1 d1ekea\_ d1i39a\_ d1ps9a2 d1lqta1 d1cjca1 d1pn0a1  
d1reoal d1ju2a1 d2f5va1 d3c96a1 d2gmha1 d1pj5a2 d1gpea1 d1o5wa1  
d1n4wa1 d2dw4a2 d2ivda1 d1seza1 d2voua1 d1kdga1 d1s5ja1 d2hbja2  
d2igia\_ d1wlja\_ d1qhta1 d4dleal d1tgoa1 d2f96a1 d3tr8a1 d3mxma\_  
d1q8ia1 d1y97a1 d1w0ha\_ d1kfsa1 d2py5a1 d1d5aa1 d1yt3a3 d2guia\_  
d3mwpa1 d4kb1a\_ d2y8ga\_ d1xkea1 d2y8fa\_ d2d5ra1 d1b9ra\_ d1offa\_  
d1frra\_ d3wcqa\_ d1e9ma\_ d1l15pa\_ d1wria\_ d1i7ha\_ d3av8a\_ d1czpa\_  
d1rfka\_ d3p1ma1 d3b2ga\_ d2bt6a2 d3nvva1 d1krha3 d2h88b1 d1n62a2  
d1t3qa2 d1kf6b2 d1zoyb1 d1jq4a\_ d1ffva2 d1dgja2 d1rm6c2 d1r7ha\_  
d1faaa\_ d1wika1 d1xfla\_ d1ttza1 d2f51a1 d1ti3a\_ d1nhoa\_ d1sena\_  
d2i4aa\_ d1ep7a\_ d1zmaa1 d3lefa1 d3diea1 d2yana1 d1z6na1 d1oaza\_  
d3zywa1 d4aj8a\_ d1nm3a1 d4fiwa\_ d1wmja\_ d4hs1a1 d1liloa\_ d1xwaa1  
d1wjka1 d2vm1a\_ d1fb6a\_ d1gh2a\_ d1h75a\_ d1nw2a\_ d1kx5b\_ d3a6na\_

d4m6ba2 d2nqbd\_ d3wkjd\_ d2yfwe\_ d4h9na\_ d5bnxa\_ d1kx5c\_ d3r45a\_  
d1eqzb\_ d4jjnb\_ d1f66c\_ d1eqza\_ d4wnnb\_ d1kx5a\_ d1u35c1 d1id3a\_  
d2nqbc\_ d1kx5d\_ d3us3a3 d3us3a1 d2b5ea2 d2b5ea3 d2b5ea1 d2b5ea4  
d2kp1a1 d2kp2a1 d1hyua3 d1hyua4 d1j08a1 d1j08a2 d1pd212 d1nhya2  
d2a2ra2 d1k0dd2 d1f2ea2 d1gsua2 d1f3ba2 d2fhea2 d2pvqa1 d1tw9a2  
d1oyja2 d1e6ba2 d1k0ma2 d3ik7a1 d4is0a1 d1r5aa2 d1jlva2 d1m0ua2  
d3gtub2 d1z9ha2 d1okta2 d1axda2 d2gsra2 d1tu7a2 d1k3ya2 d1zgma1  
d1b48a2 d1gnwa2 d1gwca2 d2gsta2 d1glqa2 d1pn9a2 d1v2aa2 d1fw1a2  
d1duga2 d1ig8a1 d1czan2 d1czan3 d1czan1 d1ig8a2 d1czan4 d1bg3a4  
d1bg3a3 d1bg3a1 d1npya1 d3t4ea2 d1a4ia1 d1o0sa1 d2hk9a2 d2egga2  
d1b26a1 d1bvua1 d1gq2a1 d1c1da1 d1leha1 d1gtma1 d1euzal d1nvtal  
d3dona2 d1edza1 d1gpja2 d1vi2a1 d1p77a1 d1nyta1 d1b0aa1 d1vl6a1  
d1v9la1 d3h1jd1 d1gd6a\_ d1f6ra\_ d1livma\_ d2gv0a\_ d1iiza\_ d2z2fa\_  
d1j8xa\_ d1ghla\_ d1b9oa\_ d1741a\_ d1691a\_ d2o4wa\_ d1p37a\_ d1k28a3  
d1xjta1 d1jtma\_ d2f2qa\_ d4e97a1 d2pjsa1 d1klla\_ d2i7ra1 d1ecsa\_  
d1xqaa1 d5cj3a1 d1npba\_ d1jifa\_ d2p7oa\_ d1r9ca\_ d1mpya2 d1kw3b2  
d1kw3b1 d4ghga1 d1tfza1 d3isqa1 d3isqa2 d1sqia1 d1sqia2 d1lkda2  
d1lkda1 d1mpya1 d1cjxa2 d1cjxa1 d1sp9b2 d1t47a1 d1t47a2 d1flua2  
d1sp8a1 d1sp8a2 d2bema\_ d1pama1 d1ea9c1 d1qhoa1 d2fhfa2 d2fhfa1  
d1k3ia1 d1j0ha1 d1cxlal d2bhua1 d1edqa1 d1flsa2 d1lut9a2 d1gvial  
d1txka1 d1etob\_ d1umqa\_ d1g2ha\_ d1ro5a1 d1pv8a\_ d1w5qa\_ d2c1ha\_  
d1l6sa\_ d2beial d4m3sa\_ d1u6ma1 d1ygha\_ d1yk3a1 d3dr6a\_ d1xmta\_  
d1z4ea1 d2ge3a1 d1bo4a\_ d2fiaa1 d2jdca1 d1y9wa1 d3to7a\_ d1wwza1  
d2f14a1 d2ozua1 d2b5ga\_ d2cy2a1 d2p0wa\_ d1cm0a\_ d4pswa\_ d1yrea1  
d1yr0a1 d1m4ia\_ d2gana1 d1yvka1 d1ghea\_ d2g3aa1 d1y7ra1 d2euial  
d1q2ya\_ d2fsra1 d1xeba\_ d2ae6a1 d1cjwa\_ d1qsma\_ d2aj6a1 d1y9ka1  
d1i12a\_ d1vkca\_ d2atra1 d1n71a\_ d2d4pa1 d2fiwa1 d2fe7a1 d1tiqa1  
d2ou2a\_ d1yx0a1 d2fcka1 d1p0ha\_ d2j8ma\_ d2pq8a\_ d1z4ra1 d1s3za1  
d1ufha\_ d1xl4a1 d3vsqa\_ d2gixa1 d1p7ba1 d1xvqa1 d1pn0a2 d3hy2a\_  
d2cvba1 d1o8xa\_ d1lu4a\_ d1we0a1 d2bmxal d2a4va1 d1psqa\_ d1xiya1  
d1q98a\_ d1n8ja\_ d1zofa1 d2ggta\_ d3tjja\_ d4je1a1 d1o73a\_ d3s9fa\_  
d2zcta\_ d1qmva\_ d1jfua\_ d2b1ka\_ d5dvba1 d2b5xa1 d2v2ga\_ d3tb2a\_  
d4llra\_ d4fh8a1 d1e2ya\_ d1knga\_ d2h30a\_ d1i5ga\_ d2z9sa\_ d2f8aa1  
d1tp9a1 d2b7ka\_ d1nm3a2 d3hvva\_ d2wfca1 d4kcea\_ d1xvwa1 d4gqca1  
d3qpma\_ d4k1fa\_ d1zzoal d1gp1a\_ d1prxa\_ d4od7a1 d1z6ma1 d4mcua1  
d4dvca1 d3l9sa\_ d1un2a\_ d3rppa\_ d1yloa2 d1y7ea2 d1y0ya3 d1l1fwa1  
d1vixa1 d1fnoa4 d1vhoa2 d1ysja1 d1vhea2 d1z2la1 d2fvga2 d1vgya1  
d1r3na1 d2grea2 d1xmba1 g1q7l.1 d1rtqa\_ d1jgta2 d1ofda3 d1ea0a3  
d1ecfa2 d1q15a2 d1ct9a2 d1te5a\_ d1ys1x\_ d4hs9a\_ d1ispa\_ d1ex9a\_  
d1ku0a\_ d3qmma\_ d3rp2a\_ g1lucy.1 d1fuja\_ d2zchp\_ d3w94a\_ d1si5h\_  
d1lo6a\_ g2pka.1 d1cgha\_ d1kigh\_ d1a5ia\_ d3s9ba\_ d1hj8a\_ d1ao5a\_  
d2anya\_ d1q3xa1 d1gvza\_ d1azza\_ d4gsoa\_ d2f91a1 d1iaua\_ d1gdna\_  
d1eufa\_ g1fiw.1 d1eq9a\_ d4nfea\_ d2rdla\_ d1spja\_ d1elva1 d1a7sa\_  
d1ekbb\_ d1yc0a\_ d2aiqa\_ g1fiz.1 d1fi8a\_ d4k60a\_ d4dgja\_ d1mzaa\_

dlop0a\_ d3tjva\_ d1pytd\_ d1sgfg\_ glgg6.1 d2eeka\_ glrtf.1 d1a0ja\_  
d3g01a\_ d1pytc\_ d4e7na\_ d1ddja\_ d1z8ga1 d2hlca\_ d1npma\_ d1brup\_  
g1jou.1 d1sgfa\_ d1autc\_ g2hnt.1 g1kdq.1 d1orfa\_ d3s69a\_ d4crga\_  
d1fxya\_ d1bqya\_ d1lgya\_ d4l3wa\_ d1llfa\_ d1gz7a\_ d1lukca\_ d1cr6a2  
d1svpa\_ d1mbma\_ d3su6a1 d4agka\_ d1vcpa\_ d1q31a\_ g1n11.1 d3e90b\_  
d1ep5a\_ d3u1jb\_ d3zxha\_ d1cgl\_a\_ d1rm8a\_ d1leaka2 d2jsda\_ d1cxva\_  
d1hv5a\_ d1i76a\_ d3p0ya1 d1lgra1 d1lgra2 d1n8yc2 d1n8yc1 d1m6ba2  
d1m6ba1 d1jx4a2 d3gv5b1 d1t94a2 d3bq0a2 d1c8nc\_ d1x36a\_ d1smvc\_  
d1ng0c\_ d4sbvc\_ d1lopa\_ d1f2nc\_ d1cixa\_ d1y29a\_ d1v7fa\_ d2jtba\_  
d1d1ha\_ d1g9pa\_ d1lupa\_ d1qk7a\_ d1mb6a\_ d2a2va\_ d1niya\_ d1i25a\_  
d1hvwa\_ d2mpqa\_ d1ie6a\_ d1la4a\_ d2mxa01 d1d10a\_ d1koza\_ d1qk6a\_  
d1emxa\_ d1lqra\_ d1c6wa\_ d1rmka\_ d1ixta\_ d1eyoa\_ d1cna\_ d1fu3a\_  
d1f3ka\_ d1fyga\_ d1rypd\_ d1irua\_ d1rypc\_ d3unfk\_ d1rypa\_ d1j2pa\_  
d1lirui\_ d1j2qh\_ d3unfh\_ d1m4ya\_ d1rypb\_ d1lirul\_ d1lirug\_ d1liru2\_  
d1q5rh\_ d1rypg\_ d1g3ka\_ d1liruf\_ d1q5qa\_ d1e94a\_ d1lirub\_ d1ryph\_  
d3ty6a\_ d1liruj\_ d1liruk\_ d1rype\_ d1lirud\_ d1lirue\_ d3mi01\_ d1rypf\_  
d1liruh\_ d2z3ba\_ d1liruc\_ d3mka2\_ d1liru1\_ d1ny721 d1ny722 d1a6ca2  
d1a6ca1 d1pgl22 d1pgl21 d1pgl11 d1ny711 d1mqta\_ d1d4m3\_ d1fmd3\_  
d2mev1\_ g1aym.1 d1ev13\_ d4q4w1\_ d1r1a3\_ d2x5ia\_ d1rhi1\_ g1r1a.1  
g1d4m.1 g1rhi.1 d1b35b\_ d1lopa\_ d1tme1\_ d4iv1a\_ g1pvc.1 g1fnp.1  
d1fnp1\_ d4gb31\_ d1d4m1\_ d1fmd1\_ d1ev11\_ d2wzr3\_ g1cov.1 d1qqp3\_  
g1fmd.1 d2x5ic\_ d1rhi3\_ g1oop.1 d1hxs1\_ d1fnp3\_ d1bev1\_ g2mev.1  
d1eah3\_ d1aym1\_ d1pvc3\_ d1qqp1\_ d1zba3\_ d1h8ta\_ d3vbhc\_ g1b35.1  
g1bev.1 d1hxs3\_ g1ev1.1 d1bev3\_ g1tmf.1 d1tmf1\_ d1b35a\_ d2mev3\_  
g1eah.1 g1h8t.1 d1eah1\_ d4q4w3\_ d1r1a1\_ d1aym3\_ d1pvc1\_ d1zba1\_  
d1h8tc\_ d1oopc\_ d1tme3\_ g1qqp.1 d4iv1c\_ g1tme.1 d3ubub\_ d1legia\_  
d1v7pa\_ d1tdqb\_ d3ubua\_ d1c3ab\_ d1h8ua\_ d3bx4b\_ d1t8ca1 d1sb2a1  
d1qdda\_ d2ziba1 d3cada\_ d1byfa\_ d1j34b\_ d1jwia\_ d1jzna\_ d1c3aa\_  
d1oz7b\_ d1wmza\_ d3bdwb\_ d1hq8a\_ d1fifa1 d1dv8a\_ d3hupa\_ d1wk1a1  
d1umra\_ d2afpa\_ d3bx4a\_ d1gz2a\_ d1s16a\_ d1v7pb\_ d3g8ka\_ d1ixxa\_  
d1j34a\_ d1jwib\_ d1g1sa1 d1y17a1 d1ja3a\_ d1fvub\_ d3bdwa\_ d1sb2b1  
d1fvua\_ d1umrc\_ d1oz7a\_ d4m17a\_ d3cfwa1 d1ypqa1 d1g1ta1 d3fd4a\_  
d3l9jc\_ d4dn8a1 d1v41b\_ d1rd11\_ d2msba\_ d4w9ta\_ d1jvna1 d4x2ra1  
d1ka9f\_ d4axka1 d1thfd\_ d1h5ya\_ d4u28a\_ d2y88a\_ d4wd0a\_ d1vzwa1  
d1ux8a\_ d4i0va\_ d2bkma\_ d1dlwa\_ d2bmma\_ d2r80b\_ d1cqxa1 d1cg5a\_  
d1gcvb\_ d3boma\_ d2h8fb\_ d2raoa\_ d3bj1a\_ d4hrrb\_ d2r50a\_ d3d1kb\_  
d2aa1b1 d3zhwa\_ d3hf4b\_ d3gdja\_ d1jebb\_ d3bj1b\_ d1x9fb\_ d1wmub\_  
d1gcv\_a\_ d3bcqb\_ d3d4xb\_ d1gvha1 d2dc3a\_ d3hf4a\_ d4yu3a\_ d3k8ba\_  
d1qpwb\_ d2r80a\_ d3bcqa\_ d1v4wa\_ d3wtgb\_ d1j17a\_ d4esaa\_ d1a9we\_  
d3d1ab\_ d1fsla\_ d4h21a\_ d1v4wb\_ d1mwca\_ d1vhba\_ d1jeba\_ d1spgb\_  
d1h97a\_ d1q1fa\_ d1tu9a1 d3d1aa\_ d1hdsb\_ d3hyub\_ d2zfb\_b\_ d3fs4a\_  
d1oj6a\_ d1shrb\_ d4h21b\_ d4yu3b\_ d1spga\_ d3hrwa\_ d3qqra\_ d3at5a\_  
d4wchd\_ d3hyua\_ d1cg5b\_ d1uc3a\_ d1hbra\_ d2raob\_ d1outb\_ d4esab\_  
d3gdjb\_ d3qqqa\_ d1x9fc\_ d3vrfa\_ d1litha\_ d3mkba\_ d3d4xa\_ d3mjpa\_

d1jl6a\_ d3fh9a\_ dlouta\_ d2dc3b\_ dlit2a\_ d3eoka\_ d3g46a\_ d1qpwa\_  
d3vrfb\_ dlch4a\_ dlx9fd\_ dlhdsa\_ d2zfa\_ d3mkbb\_ dlora\_ d3wtga\_  
d1a4fa\_ d3fh9b\_ d3bomb\_ d3cy5a\_ d3at5b\_ dlx9fa\_ d2oifa\_ d4lmb\_  
d3v57a\_ dlkn1a\_ dlcpca\_ d4f0ta\_ d2vjha\_ d4po5b\_ dleyxa\_ d1alla\_  
d4f0tb\_ dlb33b\_ dlb8db\_ d4h0mb\_ dlb33a\_ d2vjhb\_ d4lm6b\_ d2vmlb\_  
d1allb\_ d2vjta\_ d3dbja\_ d2vmla\_ d2vjtb\_ d4f0ub\_ dlf99b\_ d4rmpa1  
d1liaa\_ dleyxb\_ d2uulb\_ d4lmsb\_ d4f0ua\_ d2bv8a\_ dlf99a\_ d2bv8b\_  
d2c7lb\_ d3dbjb\_ d4rmpb1 dlb8da\_ d4h0ma\_ d3v57b\_ dlkn1b\_ d1liab\_  
d2uula\_ d2j96a\_ dlazwa\_ dlk8qa\_ d2xqfa\_ dlea5a\_ dlf6wa\_ dldx4a\_  
d1qe3a\_ dlk4ya\_ d4qwwa\_ d2ha2a\_ dlr88a\_ dlsfra\_ d4qeka\_ d3c8da2  
d2pbla1 dljjia\_ dl1zla\_ dljjfa\_ dlgl9b1 dlgkub2 dlhroa\_ d4gedb\_  
d3zooa\_ dlmz4a\_ dlgu2a\_ dlflfa\_ dl dvva\_ dlc6ra\_ dlc75a\_ dle29a\_  
dlgdva\_ dlcnoa\_ dlh32b\_ dlco6a\_ d2bh4x\_ d2aiua\_ d5cytr\_ dljdla\_  
dli8oa\_ d2zboa\_ d3dmia\_ dl1s9a\_ dlwvec\_ d2yk3a\_ d3ph2b\_ dlw0a\_  
d5aura\_ dlql3a\_ dlqn2a\_ dlflca\_ d2m5ta\_ dlcqqa\_ dlwqsa\_ d5bpea\_  
d2ipha\_ dl1voa\_ d2bhga1 d3tnta\_ d3sjia\_ d3d23a1 d2fyqa\_ d3tloa\_  
d3zvea1 d2hrva\_ d3q3ya1 d4asha1 dljmx4 d1pbya3 d1pbya4 d4iuaa3  
d4bvva\_ d5hpga\_ d3k65a\_ dlki0a3 dlki0a2 dlki0a1 d1a0ha1 d1pmla\_  
d3sp8a3 d2feba1 dl f74a\_ d3l21a\_ d2e1da\_ dlto3a1 dlw3ia\_ dlslfa\_  
dl n7ka\_ dlvcva1 d4imea\_ dlwa3a\_ d2ocza1 dl f2ja\_ d3m16a\_ d2yxga\_  
dlub3a\_ d3a5fa\_ dlfbaa\_ dl16wa\_ dlxfba1 dlwx0a1 dlvpax1 dlojxa\_  
dlmxsa\_ d2a4aa1 dlxkya1 d3cq0a1 d3s1xa\_ dl f05a\_ dlfdja\_ d3cpra1  
d4d2ja\_ dl16ja5 dl16ja4 dleaka4 dleaka3 dl16ja3 dlh8pa2 dlh8pa1  
d2ftba\_ dl pmpa\_ d2rcqa1 dlfdqa\_ d4lkpa\_ dl sa8a\_ dlvyfa\_ dl1pja\_  
d3vg7a1 d4azqa1 d5bvqa\_ dl p6pa\_ d2qo4a\_ dl opba\_ dlyiva1 dlo1va\_  
d4bvma1 d4tkba\_ d4i3ba\_ dlbwya\_ dlftpa\_ dl ggla\_ d4gkca\_ dlcbia\_  
d3p6da1 dlkqwa\_ d2a0aa1 dl m4la\_ d2bk7a\_ d3fjua\_ dlz5ra1 dlkwma1  
dluwya2 dljqga1 d2c1ca1 dl dtda\_ d3lgia\_ d3i77a\_ d2z9ia2 d4nsva\_  
dl1cya2 d4jcna\_ dl agja\_ dl os8a\_ dlhpga\_ dl p3ca\_ dl11ja\_ dle69a\_  
dlmv5a\_ d3g60a4 gl1i8.1 dl ewqa2 dlji0a\_ dl v43a3 d2wmfa1 dl vpla\_  
dlg2912 d4a82a2 gl f2t.1 d2d62a1 d3tuic1 d2bbsa1 d3g60a3 d2ixea\_  
dlg6ha\_ dlsgwa1 d2qi9c\_ d3rlfa1 d3b60a1 d3d31a2 d2pzea1 glxew.1  
dljj7a\_ dl oxk2\_ d2onka1 dlw1wa\_ dliwea\_ dlqf5a\_ dl vmaa2 dl nija1  
dl np6a\_ d2p67a1 d3ihla\_ dl okkd2\_ dl1s1a2 dl s1ma2 dliona\_ d2v40a\_  
dl dj3a\_ d3hida\_ d2vo1a1 d2g0ta1 dl vcoa2 dlj8mf2 dl g3qa\_ dl xjca\_  
dl p9ba\_ dlqzxa3 dl ihua2 dl ihua1 d2qm8a\_ dl dj2a\_ d4ioja\_ dlcp2a\_  
dl yrba2 dlhyqa\_ d3gqba2 dl xp8a1 dl tf7a2 dl tf7a1 dl ye8a1 dl skyb3  
d2qe7d2 d4blta\_ d4huta\_ d3l daa2\_ d4hyya\_ d2i3ba1 dl cr1a\_ d3j9tb2  
d3ntua2 dlvdza1 d2z43a\_ dle9ra\_ dl n1fa\_ d3ziaa2 dl n0wa\_ dl g6oa\_  
d3ziad2 d3j9ta2 dl pzna2 d3gqbb2 d2i49a\_ dl nnfa\_ dl xvxa\_ dl ursa\_  
dlh3da1 dl iuda\_ d4mlva1 dl twya\_ d3e13x\_ d2nxoa1 d4pfua\_ d3ttma\_  
dl elja\_ d2qmwa1 dl y3na1 dl jeta\_ dl uqwa\_ d4f19a1 d2esna2 d3thia\_  
d3fasa1 d2uyeb\_ d2xwva1 dl r9la\_ d2fyia1 dl pb7a\_ d2ozza1 dl sw5a\_  
dl nh8a1 dl vr5a1 d2g29a\_ dl xs5a\_ d3lswa\_ d2z23a\_ d3w9va\_ d3tcha\_

d1q35a\_ d1z7me1 d3q27a\_ d1p99a\_ d1ve4a1 d2i6ea1 d4mcoa1 d4n8ya\_  
d1eu8a\_ d1zbma1 d1hsla\_ d1ixca2 d1jl1na\_ d1xvya\_ d1y9ua\_ d2z22a1  
d1xoca1 d4oera\_ d1wdna\_ d5f1qa1 d1xt8a1 d1i6aa\_ d4gwoa\_ d4igta1  
d1pc3a\_ d4mmpa1 d1o63a\_ d2cz1a1 d2onsa2 d4mija1 d4ok5a1 d2bmfa1  
d2bmfa2 d1yksa1 d1yksa2 d1jr6a\_ d2qeqa1 d2jlqa1 d1eh3a\_ d3skpa\_  
d1dtza1 d1ieja\_ d1jnfa2 d1ce2a1 d1jnfa1 d1b1xa2 d1b1xa1 d1jw1a1  
d1jw1a2 d1ryoa\_ d1h76a1 d1h76a2 d1w52x1 d2ppla1 d1hpla2 d1lpbb2  
d2oxea1 d1bu8a2 d1rp1a2 d1c4oa1 d2p6ra3 d2p6ra4 d1oywa2 d1oywa3  
d1wrba1 d1w36b2 d1w36b1 d1c4oa2 d3bora\_ d1t6na\_ d2eyqa5 d2eyqa3  
d2eyqa2 d2zu6a2 d1veca\_ d1uaaa1 d1w36d1 d2g9na1 d1z3ix2 d2rb4a\_  
d1hv8a1 d1hv8a2 d1t5ia\_ d1w36c2 d2j0sa2 d2j0sa1 d1fuka\_ d3hjha1  
d1z5za1 d1qdea\_ d1z63a1 d1s2ma2 d1s2ma1 d1wp9a1 d1wp9a2 d1gm5a3  
d1gm5a4 d3dina4 d3dina3 d1q0ua\_ d1w36c1 d1z3ix1 d1nkta3 d1nkta4  
d1uaaa2 d1w36d2 g1qhh.1 d2fwra2 d2fwra1 d3q3ma\_ d1za0a1 d1mxra\_  
d2inca\_ d1jk0a\_ d2incb\_ d1mhyb\_ d3hf1b\_ d1r2fa\_ d2uw1a\_ d1mhyd\_  
d3n37a\_ d1afra\_ d1oquc\_ d1syys\_ d1mtyd\_ d2olza\_ d1uzra\_ d1smsa\_  
d2fkza\_ d1zujal d1s3qa1 d2fjca1 d1z6om1 d1veia\_ d4dyya\_ d1jiga\_  
d3gvya\_ d2pyba\_ d4cy9a1 d3bvfa1 d1r03a\_ d2cf7a\_ d1nf4a\_ d1zs3a1  
d4iwka\_ d3ka8a\_ d3np0x\_ d1n1qa\_ d1l1b3a\_ d4e6ka\_ d1z6oa1 d2fzfa1  
d4dyua\_ d3ge4a\_ d1jgca\_ d4am4a\_ d2z6ma\_ d1ji5a\_ d1vlga\_ d1lkoa1  
d1krqa\_ d3qz3a\_ d1o9ra\_ d2ffxj\_ d1euma\_ d1yv1a1 d2v2pa\_ d1j30a\_  
d4di0a\_ d2cbia2 d2choa2 d1l8na1 d1oewa\_ d2qzxa\_ d2asia\_ d1psoe\_  
d1miqa\_ d1smra\_ d2h6ta\_ d1pfza\_ d1lizda\_ d3hd8a\_ d1j71a\_ d1dpja\_  
d4aa9a\_ d1t6ex\_ g1b5f.1 g1lya.1 g1htr.1 d1qdma2 d1bxoa\_ d1wkra\_  
d1tzsa\_ d1libqa\_ d2qzwa\_ d1ex4a2 d1c6va\_ d1bdqa\_ d3ggta\_ d3ixoa\_  
d1mrxa\_ d2haha\_ d1tw7a\_ d4njsa\_ d1sgua\_ d2p3da\_ d1nsoa\_ d3d3ta\_  
d2rkfa\_ d1c6ya\_ d2rspa\_ d3ogpa\_ d3ekwa\_ d2o4na\_ d2j9ja\_ d1baia\_  
d3ggua\_ d3l1zua\_ d4npua\_ d4j55a\_ d2r8na\_ d2fxda\_ d2p3ca\_ d4dqea\_  
d3t1tpa\_ d3t3ca\_ d2p3aa\_ d2hc0a\_ d2fdda\_ d3mwsa\_ d1sr9a2 d1rqba2  
d1k8rb\_ d1wgra1 d1ef5a\_ d1wfyal d1e8ya3 d1wgya1 d1l1fda\_ d2cs4a1  
d1wxma1 d2byea1 d3kh0a1 d2byfa1 d1wxaa1 d1e7ua3 d1h4ra3 d4y18a1  
d2a16a3 d1wgda1 d1wggal d4q5eb\_ d1wjna1 d1se9a\_ d3n3kb\_ d1wz0a1  
d1we6a1 d2m0xa\_ d2gbka\_ d3rt3b1 d1wh3a1 d1sifa\_ d2ekec2 d4ii2b1  
d4hk2a1 d1m94a\_ d1wgha1 d1ttna1 d1j8ca\_ d1wx8a1 d3v6cb1 d2ma9b\_  
d4i61b1 d1bt0a\_ d2jvca1 d1iyfa\_ d2k1fa\_ d1wxva1 d1wf9a1 d1t0ya\_  
d2io0b2 d1x1ma1 d2gbma\_ d1zw7a1 d2m17a\_ d1ud7a\_ d1we7a1 d2l1wpa\_  
d2gbja\_ d1wjua1 d1v6ea1 d1v86a1 d4eewa\_ d1w1aa1 d4icva\_ d4gu2a\_  
d1wx7a1 d1wy8a1 d4h1jka1 d2faza1 d1v5oa1 d2a13a1 d2cr5a1 d1wj4a1  
d1s3sg\_ d3nqyb\_ d4gera\_ d1bqba\_ d4lu0a\_ d1of8a\_ d3unda1 d3e9aa1  
d1vr6a2 d1n8fa\_ d2qkfa\_ d1d9ea\_ d2h0ba\_ d2erfa\_ d1h30a2 d1h30a1  
d3mw4a1 d1pz7a\_ d2r1ba\_ d3v64a1 d1d2sa\_ d3bopa1 d3mw3a1 d1okqa2  
d1dszb\_ d1a6ya\_ d3cbba\_ d1ynwa1 d1r4ia\_ d1hcqa\_ d2hana\_ d2hanb\_  
d2enva1 d1kb4b\_ d2n11b\_ d1l01a\_ d1lum8a\_ d1ixza\_ d1qvra2 d1qvra3  
d1qzma\_ d1sxjc2 d1jr3d2 d2p65a\_ d1l18qa2 d1g8pa\_ d3hu3a3 d1sxjd2

d1njfa\_ d1in4a2 d1sxja2 d1tuea1 d2ce7a2 d1w5sa2 d1sxjb2 d1d2na\_  
d1ny5a2 d1ofha\_ d2gnoa2 d2a5yb3 d1fnna2 d1u0ja1 d1lv7a\_ d1liqpa2  
d2fnaa2 d1ixsb2 d4gita\_ d1sxje2 d2lj7a\_ d1n4na\_ d2m8bb1 d2kyqa\_  
d3psma\_ d1jkza\_ d1jxca\_ d2glla\_ d1ugla\_ d4uj0a\_ d2k4ua\_ d1hp2a\_  
d2lu9a\_ d1baha\_ d2meoa1 d1wm7a\_ d1hlya\_ d1n8ma\_ d1jlza\_ d1wpda\_  
d1c55a\_ d1pvza\_ d1wt7a\_ d1rjia\_ d1wz5a\_ d1m2sa\_ d1pjva\_ d1c49a\_  
d1qkya\_ d2ktca1 d1wmta\_ d1du9a\_ d1j5ja\_ d1rlga\_ d1t0za\_ d2i6la\_  
d1t1ta\_ d1sn4a\_ d1kv0a\_ d2lkba\_ d1npia\_ d1wwna\_ d1pe4a\_ d2kbka\_  
d2li7a\_ d1djta\_ d2kbha\_ d1dq7a\_ d1sega\_ d1omya\_ d1zywa1 d1jzaa\_  
d1lixra2 d1iyjb4 d1iyjb5 d1iyjb3 d1o7ia\_ d4ipca1 d1x3ea\_ d4apva\_  
d1jb7a1 d1jb7a2 d1jb7a3 d3kdfa\_ d1ue1b\_ d1wjja1 d3eiva\_ d1xjva2  
d1xjva1 d2ccza2 d1se8a\_ d1ll1oc\_ d1jb7b\_ d1qvca\_ d3ulla\_ d1qzga\_  
d1miua4 d1miua5 d1miua3 d3g48a1 d1gd7a\_ d1mkha\_ d1jjcb3 d1y14b1  
d2nn6i1 d1i94l\_ d2zjra2 d1smxa\_ d2qamc2 d1hh2p1 d2r7da1 d1rl2a2  
d1wfaq1 d3bzka4 d1x6oa2 d3a0ja\_ d2j01d2 d2ja9a1 d4q15a\_ d1hr0w\_  
d1luza\_ d2n3sa\_ d2vnud1 d1h95a\_ d1go3e1 d2nn6h1 d1ne3a\_ d2mola\_  
d1iz6a2 d1jjga\_ d1e3pa2 d2ix0a3 d2ix0a2 d2lxja\_ d1ueba3 d1ueba2  
d2z0sa1 d1u0la1 d2ix0a1 d2eifa2 d2je6i1 d3i2za1 d2c35b1 d2ahob2  
d1t9ha1 d3i4oa\_ d2qall1 d1jt8a\_ d2nn6g1 d1g6pa\_ d3cama\_ d1i94q\_  
d1c9oa\_ d1d7qa\_ d2ba0a1 d2vnud2 d2vnud3 d1khia2 d2qalq1 d1wi5a1  
d1xtda2 d1dgsa2 d1fvial d1ckma1 d1p16a1 d1x9na2 d2aq2b1 d1ck1a1  
d1enfa1 d1i4pa1 d1v1oa1 d1et9a1 d1esfa1 d2g9hd1 d4ohja1 d1klud1  
d1bxta1 d1eu3a1 d1ty0a1 d1fnua1 d1novc\_ d2bbvc\_ d3azya\_ d3wvja\_  
d1upsa1 d1ajoa\_ d2hyka\_ d1ajka\_ d2vy0a\_ d1o4ya\_ d3o5sa\_ d3d6ea\_  
d3atga\_ d1dypa\_ d1umza\_ d3i4ia\_ d1c1la\_ d4lbqa\_ d1a78a\_ d1slta\_  
d4no4a\_ d3zsja\_ d3duia\_ d1is3a\_ d1qmja\_ d1hlca\_ d1tdha3 d1q3ba3  
d1k82a3 g1qmo.1 g1len.1 d3zyra\_ d1fnya\_ d1n47a\_ g21tn.1 d1avba\_  
d3usua\_ d1dhkb\_ d1f9ka\_ d1lukga\_ d1g8wa\_ d1g9fa\_ d1wbfa\_ d3wcsa\_  
d1g7ya\_ g1loe.1 d1mvqa\_ d1hq1a\_ d1v6ia\_ d1dbna\_ d1qnwa\_ d1fx5a\_  
d4l8qa\_ d1ioaa\_ d3n35a\_ d1epwa1 d3h33a\_ d1rwja\_ d19hca\_ d1os6a\_  
d3bxua\_ d3h4na\_ d1i77a\_ d3caoa\_ d1j0pa\_ d2ctha\_ d1duwa\_ d1ofwa\_  
d2e84a\_ d1hh5a\_ d1gyoa\_ d3h34a\_ d1wioa4 d1ccza2 d1vcaa1 d1dr9a2  
d1ic1a1 d2d9qb1 d2nxyb2 d1adqa1 d1fnga1 d1uvqb1 d1zs8a1 d2vola1  
d2vola2 d1mfb12 d2jelh2 d1uwel2 d3qq4b1 d1kjbv\_ d1k5na1 d1osph2  
d4odh12 d1ow0a1 d1ow0a2 d1bfob2 d3l9ra2 d3jtth1 d2fath2 d4elkb2  
d1fn4b2 d2xfxb\_ d1pg7x2 d1cqka\_ d4k71b2 d1lk2a1 d1eapb2 d4lfhg2  
d1i4fa1 d2nw2a2 d1kfah2 d1mhca1 d1h3ua1 d1wejh2 d1h0db2 d1a5fh2  
d1kcvh2 d1mjuh2 d1qqda1 d1kcrh2 d1k8ia1 d3huja2 d2nnab1 d1nfd2  
d3mffb2 d1s9va1 d1lk3h2 d1q0xl2 d1fv1b1 d1neza1 d4rfeb2 d1r3ha1  
d1a6tb2 d1kjva1 d1pz5b2 d1onqa1 d2bc4a2 d1de4a1 d1k8da1 d1tcra2  
d1dn0b2 d1nfde2 d2xwtb2 d1bfoa2 d1mexh2 d1iakb1 d1ypzf2 d4f7ea2  
d1q72l2 d2fbjh2 d1fe8h2 d1clzh2 d1fngb1 d1uvqa1 d1vgka1 d1c16a1  
d4j12a2 d4x99b2 d1igtb3 d1je6a1 d1q72h2 d1nldh2 d1teth2 d2hmic2  
d1i1ca2 d1i1ca1 d1k8ib1 d1q0yh2 d1kfa12 d3frua1 d1pg7w2 d1u58a1

d1igyb4 d1igyb3 d1hyrc1 d1klub1 d1deeb2 d1c12b2 d2bc4b2 d2ig2h2  
d1kcvl2 d3wn5b1 d1lk2b\_ d1lk3l2 d1mju12 d1sm3h2 d1q0xh2 d1zvsa1  
d1ydpa1 d1u8ib2 d1ypze2 d1kcu2 d1op9a\_ d1y0la1 d1letzb1 d1egj11  
d2gsib1 d1nj9a1 d4jfh1 d1aqk11 d1t2ja\_ d1lo4h1 d1zvya1 d3v4v11  
d4enec1 d1kxtb\_ d5e8ea1 d2pxya\_ d4weud\_ d1xiwc\_ d2esvd1 d1qznh\_  
d1ogae1 d1f4xh1 d4n1hb\_ d3ezjb1 d3mlw11 d1kfah1 d1letza1 d1b4jh1  
d3cfic\_ d4w68a\_ d2arja1 d1ek3a\_ d2ok011 d1vera\_ d1luwgh1 d1blnb1  
d1fpth1 d1rzga1 d2giya1 d4m3kb1 d1nc2a1 d2nyyd1 d1ncna\_ d1fbih1  
d5dxwa\_ d4fqqa1 d1dqdh1 d1jfq11 d1kelh1 d1faih1 d1frgl1 d1figl1  
d4m6n11 d1fo0a\_ d4hxb11 d3b5ga\_ d3quyd1 d2h9gb1 d1i8kb\_ d2dd8h1  
d2ck0h1 d1eaja\_ d4w6wb1 d2a6ib3 d1t66d1 d2e27h\_ d1ob1b1 d1f11b1  
d2v7na1 d1ad0a1 d2xt1b1 d1pskh1 d4i13b1 d2op411 d1a0q11 d1luwe11  
d1za3a1 d1ncb11 d4uu9a\_ d1bm3h1 d1cloh1 d1nqba2 d1cf8h1 d4y5va\_  
d1mhph1 d5anma1 d4cdgc1 d4ldeb\_ d1y01b1 d2pcpb1 d1z3g11 d1dfb11  
d1fh5h1 d3g5xa1 d1tzib1 d4dn3l1 d3zhka1 d2b1hh1 d2uyl1 d1f3dh1  
d1nj9b1 d2agjh1 d2h1p11 d1q72h1 d8fabb1 d1ndmb1 d1rjca1 d4u6hb1  
d3upca\_ d2fbj11 d1osph1 d1tvda\_ d2cjh\_ d4fhbd1 d1bd2d1 d1rz7h1  
d3nn8a\_ d1blna1 d1knoa1 d1nfda1 d2bmkb1 d1dq11\_ d1igyb1 d1igf11  
d12e8h1 d3utza1 d1nc2b1 d1rihh1 d4mwfb1 d4jvpa1 d1mieh1 d1rhfa1  
d1fgn11 d1sbsh1 d1lp9e1 d1dn0a1 d4lqf11 d1iaih1 d1kgcd1 d1mh5b1  
d1gpol1 d2g60h3 d1f8t11 d2jixd1 d4grwh\_ d1fo0b\_ d1bfob1 d1axsa1  
d1u9ka\_ d1nmbh\_ d1h8na1 d1h8na2 d1jguh1 d4eura1 d3sdy11 d35c8h1  
d1w72l1 d1mvub\_ d1i9rh1 d1ob1a1 d4wenb\_ d1yeeh1 d3ietc1 d1f58h1  
d1ad0b1 d1mqk1\_ d1nbvh1 d4b50a\_ d3r8bb\_ d1baf11 d1mamh1 d4rgne1  
d2gsgb\_ d35c8l1 d1bafh1 d1ai1h1 d2pcpa1 d2fath1 d2x1pa\_ d1orsb1  
d1ibg11 d1shma\_ d1a2yb\_ d1u0qa\_ d2coqa\_ d1hilb1 d1qfwi\_ d1jv5b\_  
d1fn4b1 d5e0qa\_ d1nsnh1 d1plg11 d4ocx11 d1kb5h1 d1rzhf1 d1pg7x1  
d2fx7h1 d2oi9c\_ d1l7i11 d3eyva1 d1d5i11 d4ffyl\_ d1tet11 d1a6wh\_  
d1ac6a\_ d3dvfa\_ d1nfde1 d1mimh1 d1ri8a1 d1jhlh\_ d3dura\_ d1fskb1  
d1f97a1 d3so3b1 d2ak4d1 d1lp9f1 d4z7wf1 d1l7th1 d4y5ya\_ d4x7ec1  
d1emth1 d1ikf11 d1nlbh1 d4uta11 d1bjma1 d1eapb1 d1u6ah1 d2dtgd1  
d1kj2b\_ d1xeda1 d1c1eh1 d1fgvh\_ d2bnub1 d2fb4h1 d2dtgb1 d1ktrh\_  
d1jpth1 d1qkz11 d4hepg\_ d2atpb1 d1flrh1 d2hrp11 d1mvfa\_ d1iaim1  
d3k80a1 d2jb5h1 d3zkxc\_ d4grwe\_ d1it9h1 d1rhhb1 d3w9ec\_ d1e4wh1  
d1sy6h1 d2j6eh1 d3qxta\_ d1jglh1 d1p7ka1 d1tzhb1 d4n8pa1 d1gaf11  
d2jelh1 d1wioa2 d4i0cc1 d1cicb1 d1lmka2 d1lmka1 d1iqwh1 d1lorqb1  
d1ejoh1 d1jnlh1 d4zga1\_ d43c9b\_ d1ggbl1 d1wejh1 d3q6fa1 d1f3dj1  
d3c6la1 d1bqlh1 d3p9wb\_ d1a3r11 d1h0db1 d2uzil\_ d1eo8l1 d1qfwl\_  
d1n7ml1 d1igja1 d1c5ch1 d2a9mh\_ d1rmfh1 d1fj1b1 d4heme\_ d1ccza1  
d1a5fh1 d1ogad1 d1dlfh\_ d1qa9b\_ d1vge11 d3qskb\_ d1sjxa\_ d4ozfg1  
d1sq2n\_ d1qd0a\_ d1kcvh1 d1c5db1 d3qcul1 d3bn9d1 d1mjuh1 d4y8dc\_  
d7fabh1 d3dvgb1 d1lo011 d1a6tb1 d1gigh1 d1kcrh1 d2hwz11 d1yjdc1  
d3clf11 d4krna\_ d1d17l\_ d1e6o11 d1mexh1 d3r0ma\_ d4kkna\_ d1fns11  
d1oaqh\_ d1rzia1 d1lucbh1 d1ncw11 d4b41a\_ d1nfd11 d2mpah1 d2d7t11



d4grwf\_ d4b5ea\_ d11k3h1 d3u79a\_ d4u3xa\_ d1ghfl1 d1bvkb\_ d1mcww1  
d1b88a\_ d1jrhh1 d32c2b1 d4wemb\_ d1dsfh\_ d1op3h1 d1cell1 d1iqda1  
d1qoka1 d1qoka2 d1qfuh1 d2crya1 d1ay1h1 d1oaql\_ d3ab0b\_ d1rur11  
d1t4kb1 d1bz7b1 d1n0xh1 d1for11 d1lucb1 d4w6yb\_ d43c9a\_ d2aab11  
d1tzia1 d4n1ca\_ d1k6qh1 d3g9ab\_ d4tvsa1 d1igmh\_ d1pz5b1 d3dx9a1  
d3wxwh\_ d1nakh1 d1kcul1 d3eaka\_ d4qlra1 d1cr911 d1d9ka\_ d1f4x11  
d1deea1 d2i27n2 d1c12a1 d2orbl1 d1j8hd1 d1mcph1 d1c5da1 d1kenh1  
d1bd2e1 d1h5ba\_ d4x7fc1 d3upaa\_ d1t3fa1 d1indh1 d2dtgc1 d4hc111  
d1zv5a1 d4wgvb\_ d1uwgl1 d4f37k1 d1aqkh1 d1vesa\_ d3zkqd\_ d1fpt11  
d11o411 d1knob1 d3rrqa\_ d1ct8b1 d4orz\_ d1mlbb1 d4hgkc1 d1dqd11  
d1bogb1 d4ozhe1 d1dr9a1 d1i7za1 d1dn0b1 d1kell1 d1rzb1 d1ypzf1  
d1wtla\_ d1hkfa\_ d1fail1 d1figh1 d2vyre\_ d1sjva\_ d1ohqa\_ d1bfoa1  
d1pkqb1 d1mjul1 d1b4j11 d1nsl1 d2arjb1 d1p4bh\_ d4aj0a\_ d3nn8b\_  
d2rcja1 d1f2xk\_ d4v1dd\_ d1adqh1 d2eksa\_ d4k3ga\_ d1jfqh1 d1uweh1  
d1frgh1 d4gftb\_ d1uz8b1 d4n1ea\_ d1bm311 d1clo11 d3mcka1 d2vq1a1  
d1ae6h1 d4aq1b1 d1uj3b1 d1nbqa1 d1fh511 d2ck011 d2ywza\_ d1q7211  
d4nxbx\_ d1hila1 d4hz1b1 d2j8811 d1zmya1 d1cd0a\_ d1a4ka1 d1psk11  
d1a0qh1 d4krmb\_ d1ncbh1 d2fbjh1 d1j8he1 d1i3ua\_ d1cf811 d1fe8h1  
d2plya1 d1eeqa\_ d2x89a\_ d1o10a\_ d2r01h1 d1ub5a1 d1dfbh1 d3eyvb1  
d4jdvb1 d4p2cg\_ d2gsia1 d2agj11 d1u3ha1 d2h1ph1 d1rih11 d1fskc1  
d1boga1 d2a7711 d1osp11 d1qfoa\_ d3dwta\_ d2fx711 d1rz711 d3stba1  
d1pkqa1 d1b6da1 d1dzba2 d1dzba1 d1kj2a\_ d411ha\_ d1rzgb1 d1dqlh\_  
d12e811 d1mie11 d1jmaa\_ d1sbs11 d1fgnh1 d1f5811 d1mqkh\_ d1ndgb1  
d3qeg11 d1ia11 d2aw2a1 d1tqbc1 d3fo2a1 d4dkaa\_ d1f8th1 d2g6011  
d2ywya\_ d1uj3a1 d1yc7a\_ d3bd3a\_ d4w6xb1 d1nmb1\_ d1i8ka\_ d1rj1b1  
d1ypze1 d1p7kb1 d1kxqe\_ d1gpoh1 d2z4qa1 d1w72h1 d1i9r11 d4qgya1  
d4xt1c\_ d2qqnh1 d1cica1 d3c08h1 d2cd0a\_ d2bdnh1 d1hnga1 d1mam11  
d1nldh1 d1cr9h1 d41cih1 d3bkyh1 d3qg711 d1ai111 d1kxvc\_ d4iosd\_  
d117ih1 d2x1qa\_ d1ub6b1 d3k74b\_ d1ibgh1 d1teth1 d1igya1 d1hxma1  
d2x6ma\_ d2e71a\_ d5e03a\_ d1qfwm\_ d2r0kh1 d1igjb1 d1rurh1 d1plgh1  
d1mj8h1 d1yuhb1 d3fmg11 d1rzf11 d1emt11 d1ad9b1 d1igtb1 d1nlb11  
d1d5ih1 d3k7ua\_ d4ffyh\_ d1bwwa\_ d3dvga1 d1a6ta1 d1fgvl\_ d4qxgl1  
d1mim11 d1jh11\_ d2hffb1 d2hh011 d1qkzh1 d117t11 d1afvh1 d1iaii1  
d2cjuh\_ d1um5h1 d2ghwb2 d2ghwb1 d1kgce1 d2fgwh1 d1ikfh1 d1dvfd\_  
d2i24n1 d2xtjb\_ d1za3b1 d2yc1a\_ d2hh0h1 d2x1oa\_ d1bvka\_ d1rj1a1  
d5e7ba1 d1igta1 d1i11b1 d2fb411 d1mvua\_ d1jpt11 d32c2a1 d1fvca\_  
d1iqdb1 d2hrph1 d2p4ab\_ d4qo1a\_ d1p2cb1 d1wt5c\_ d1t4ka1 d5c1mb\_  
d1it911 d1bz7a1 d1b2wh1 d1e4w11 d1jnl11 d1yedb1 d1za6b1 d3u7aa\_  
d1igfh1 d3gnm11 d1orsa1 d1wejl1 d1a2ya\_ d1hxmb1 d1gafh1 d2j4wh1  
d1pz5a1 d1j05a\_ d1a3rh1 d4fq111 d1qfwh\_ d1eo8h1 d1n7mh1 d4s11a\_  
d1kegh1 d5da4a\_ d1iqw11 d3whxb1 d1vgeh1 d1deeb1 d1c12b1 d1t2q11  
d1ad9a1 d3gsnb1 d3b2uc1 d1ggbh1 d1t3fb1 d1nak11 d4ocmc\_ d1lila1  
d2v7hb3 d2esve1 d1mcoh1 d2qr0b1 d2q3aa\_ d1ct8a1 d1kcr11 d2pxyb\_  
d2uzih\_ d5c3ld\_ d3durb\_ d1c5c11 d2ak4e1 d1dl7h\_ d1xiwd\_ d1mlba1

d1rmfl1 d1i7zb1 d1dlfl\_ d2xa3a\_ d5bq7b1 d1dqqb1 d3h42l1 d1egjh1  
d1kcvl1 d1fe8l1 d2j6e11 d1f3rb2 d1lk3l1 d1sm3h1 d1q0xh1 d1ghfh1  
d7fabl1 d1igch1 d1l00h1 d4idla\_ d5c2b1\_ d1jrh11 d1l1la1 d3zhda1  
d4kfzc\_ d1b0wa\_ d1e6oh1 d1mexl1 d4krpb\_ d1fnsh1 d1ncwh1 d4hgma\_  
d4eigb1 d4rzca\_ d2mpal1 d4y5xa\_ d5en2b1 d3lrge1 d4ej1c1 d1rhha1  
d1j05b\_ d1forh1 d1q9wb1 d2wzpd\_ d2aq2a1 d1h0da1 d3revb1 d2ij0c1  
d1tzha1 d4m7j11 d1k6q11 d3b9kc1 d1igml\_ d3qeua1 d1dsfl\_ d1celh1  
d1kcu11 d1zvha1 d1zvoa1 d1tqbb1 d1ay1l1 d2qsc11 d2cgrh1 d1n10h1  
d1ken11 d3eo0a1 d4n9ob1 d1n0x11 d3k1kc\_ d1c4qa\_ d2wv6d\_ d1prtf\_  
d1l1trd\_ d4l63b1 d1r4pb\_ d1prtd\_ d1t10f\_ d2bosa\_ d1prtb1 d3chbd\_  
d2cqva1 d1fhga\_ d2k1ma\_ d2d12a1 d1biha3 d1biha1 d1biha4 d3qp3a1  
d1g1ca\_ d1gxea\_ d1cvsc2 d1cvsc1 d1xmwa2 d1m4ka2 d2otpa2 d1biha2  
d1rhfa2 d2fcba2 d2fcba1 d1wwbx\_ d1lepfa1 d1lepfa2 d2dava1 d1waaa\_  
d1f97a2 d1x44a1 d1vcaa2 d1fnla2 d1fnla1 d3b5ha2 d3h8na2 d3h8na1  
d1jbj11 d1jbj12 d1pd6a\_ d1f2qa2 d1f2qa1 d3cx2a\_ d1nbqa2 d3b5ha1  
d1n26a1 d1xiwb\_ d1xaua\_ d1fltx\_ d2ifga1 d1olla1 d1olla2 d1cs6a4  
d1cs6a3 d1cs6a2 d1cs6a1 d2gw5a2 d1sy6a1 d1xiwa\_ d1lucta2 d1lucta1  
d1ry7b2 d1gl4b\_ d1qz1a3 d1olza1 d2c9aa1 d1wwca\_

**Family-69 (c.47.1.1)**

**Positive dataset contains 21 protein sequences.**

d1faaa\_ d1wika1 d1xfla\_ d1ttza1 d2f51a1 d1ti3a\_ d1sena\_ d2i4aa\_  
d1zmaa1 d3lefa1 d3diea1 d2yana1 d1z6na1 d3zywa1 d4aj8a\_ d4fiwa\_  
d1wmja\_ d4hs1a1 d1xwaa1 d1wjka1 d2vm1a\_

**Negative dataset contains 3938 protein sequences.**

d1m32a\_ d1libja\_ d1c7na\_ d1iuga\_ d4q75a\_ d2bkwa1 d1t3ia\_ d1n8pa\_  
d1qz9a\_ d1jff9a\_ d1eg5a\_ d1p3wa\_ d3kgwa\_ d1cl1a\_ d2ctza1 d1vjoa\_  
d2rfva\_ d1gc0a\_ d1cs1a\_ d1d2fa\_ d2ch1a1 d1qgna\_ d1pffa\_ d1elua\_  
d1ax4a\_ d2v1pa1 d2ez1a\_ d1u08a\_ d1b5pa\_ d2ay1a\_ d1bw0a\_ d3pd6a\_  
d7aata\_ d2csta\_ d1j32a\_ d1fg7a\_ d4wlha\_ d1o4sa\_ d1v2da\_ d1gdea\_  
d1m6sa\_ d1v72a1 d1svva\_ d1ajsa\_ d1wsta1 d2f8ja2 d1lk9a\_ d1vp4a1  
d1xi9a1 d2gb3a1 d1yaaa\_ d2bnma2 d1xkla\_ d2wfla\_ d2ovga\_ d1sq8a\_  
d1rzsa\_ d3kz3a\_ d3orca\_ d2cfba1 d1dfoa\_ d1o69a\_ d1bj4a\_ d3k28a\_  
d2bwpa\_ d3lg0a\_ d2fnua\_ d3ou5a\_ d1z7da1 d1b9ha\_ d1iaya\_ d4msoa\_  
d1bs0a\_ d1s0aa\_ d1sffa\_ d3tqxa\_ d1mdoa\_ d3qboa\_ d3pgya\_ d1bjna\_  
d2dkja\_ d1ejia\_ d1vefa1 d4wxga\_ d3bs8a\_ d3gbxa1 d1w23a\_ d2b5aa1  
d2ofya1 d4mcxa\_ d2xi8a\_ d2icta\_ d2bnma1 d2ppxa1 d1y7ya1 d4nmwa\_  
d1r0ka3 d1vkoa2 d1vm6a2 d3qvsa2 d1gr0a2 d1p1ja2 d1i26a\_ d1ddla\_  
d1e57b\_ d1fwxa1 d1libya\_ d1f56a\_ d1bypa\_ d1azca\_ d1ws8a\_ d3u25a\_  
d1cuoa\_ d1lid2a\_ d1rkra\_ d2iaac\_ d4dp1x\_ d1nwpa\_ d2gima\_ d2i7sa\_  
d1qhqa\_ d1gyca3 d1hfua2 d1kbva1 d1kbva2 d1sdda1 d1sdda2 d1gyca1  
d1gyca2 d1mzya1 d2bw4a1 d1aoza1 d1aoza3 d1aoza2 d1kyaa2 d1kyaa3  
d1kyaa1 d1mzya2 d4e9sa1 d1sddb1 d1sddb2 d1hfua1 d1hfua3 d1oe1a2  
d1oe1a1 d1v10a2 d1v10a3 d1v10a1 d2dara2 d2dara1 d1wyha2 d2dloa2  
d1rutx4 d1rutx3 d2cuqa2 d1x41a2 d1x41a1 d1x3ha2 d1x3ha1 d2d8za1

d1x61a2 d1x6aa1 d1x6aa2 d2cora2 d2cora1 d1v6ga1 d1v6ga2 d2d8za2  
d1x64a1 d1x64a2 d1b8ta1 d2co8a1 d1x63a2 d2dj7a2 d2dj7a1 d2cu8a2  
d2cu8a1 d1g47a2 d1g47a1 d1j2oa1 d1wyha1 d2dloa1 d1wiga1 d1wiga2  
d2cupa2 d2cupa3 d1x68a1 d2d8ya2 d2d8ya1 d1m3va2 d1x62a1 d1x68a2  
d1x61a1 d1b8ta3 d1b8ta2 d2d8xa2 d2d8xa1 d1x4ka1 d1x4ka2 d2cuqa1  
d1m3va1 d2co8a2 d1j2oa2 d1x63a1 d2cura1 d2cura2 d1x62a2 d1xkta1  
d2hfka\_ d5d3ka\_ d3sxwa1 d4luka\_ d2bema\_ d1pama1 dlea9c1 d1qhoa1  
d2fhfa2 d2fhfa1 d1k3ia1 d1j0ha1 d1csla1 d2bhua1 d1edqa1 d1f1sa2  
d1ut9a2 d1gvia1 d1txka1 d4alac\_ d1rera1 d1s6na\_ d3uzqb\_ d2phla1  
d1fxza2 d1fxza1 d1lrha\_ d1uija1 g1dgw.1 d2v09a\_ d1uika2 d1uika1  
d1dgwa\_ d1ep0a\_ d2pa7a1 d1wlta1 d1nxma\_ d2c0za1 d1ds6b\_ d1fstb\_  
d1ydwa2 d2nvwa2 d1h6da2 d1zh8a2 d1qkia2 d1xeea2 d1t1ta2 d1mqta\_  
d1d4m3\_ d1fmd3\_ d2mev1\_ g1aym.1 d1ev13\_ d4q4w1\_ d1r1a3\_ d2x5ia\_  
d1rhi1\_ g1r1a.1 g1d4m.1 g1rhi.1 d1b35b\_ d1loopa\_ d1tme1\_ d4iv1a\_  
g1pvc.1 g1fpn.1 d1fpn1\_ d4gb31\_ d1d4m1\_ d1fmd1\_ d1ev11\_ d2wzr3\_  
g1cov.1 d1qqp3\_ g1fmd.1 d2x5ic\_ d1rhi3\_ g1oop.1 d1hxs1\_ g1hxs.1  
d1fpn3\_ d1bev1\_ g2mev.1 d1eah3\_ d1aym1\_ d1pvc3\_ d1zba3\_ d1h8ta\_  
d3vbhc\_ g1b35.1 g1bev.1 d1hxs3\_ g1ev1.1 d1bev3\_ g1tmf.1 d1tmf1\_  
d1b35a\_ d2mev3\_ g1eah.1 g1h8t.1 d1eah1\_ d4q4w3\_ d1r1a1\_ d1aym3\_  
d1pvc1\_ d1zba1\_ d1h8tc\_ d1oopc\_ d1tme3\_ g1qqp.1 d4iv1c\_ g1tme.1  
d1e3oc2 d1lic8a2 d4aw8a\_ d2q49a2 d1hdgo2 d2g17a2 d2cvoa2 d2czca1  
d3pwka2 d1obfo2 d1i32a2 d1zyao2 d2pkqo2 d1b7go2 d2hjsa2 d1cf2o2  
d1vkna2 d1nvmb2 d2m9wa1 d3dfxa\_ d2msya\_ d2djoa1 d2r5za\_ d1au7a1  
d1f43a\_ d2lmda1 d1akhb\_ d1s7ea1 d3nara\_ d1zq3p1 d2craa1 d1mija\_  
d4uuta\_ d3a01a\_ d1x58a1 d3rkqa1 d3cmya1 d2cqa1 d2da6a1 d1e3oc1  
d1fjla\_ d1mh3a1 d1ig7a\_ d1x41a1 d1wh7a1 d1gt0c1 d2mw8a\_ d1lfup\_  
d1x2ma1 d1b72a\_ d1wi3a1 d1jgga\_ d1wjha1 d1x2na1 d1mnmc\_ d2cuea1  
d3k2aa\_ d2hosa\_ d2jwta2 d1pufa\_ d1oact1 d2hi3a\_ d1b8ia\_ d4j19a\_  
d3lnqa\_ d1wh5a1 d1b8ib\_ d1fexa\_ d2cqra1 d1guua\_ d1ug2a1 d2cqqa1  
d2ajea1 d4a69c\_ d1h8ac1 d2crga1 d2iw5b1 d1xc5a1 d1ofcx1 d2cu7a1  
d1wgxa1 d2cjja1 d2ckxa1 d1tc3c\_ d1gdtal d1u78a2 d1xg1a1 d2iu5a1  
d1zk8a1 d2g7sa1 d2fd5a1 d2np5a1 d1z0xa1 d2id6a1 d2d6ya1 d2i10a1  
d1vi0a1 d2oi8a1 d3c07a1 d2ns7a1 d2fq4a1 d2yvea1 d1t33a1 d2o7ta1  
d1rhta1 d2np3b1 d2g7ga1 d2gena1 d2fbqa1 d2g7la1 d2gfna1 d2g3ba1  
d2jj7a1 d2hyja1 d1sgma1 d1ui5a1 d2hkua1 d2id3a1 d4jyka1 d1b10a1  
d1b10a2 d1d5ya2 d1prtc2 d1prtb2 d3lv8a\_ d1s3ga1 d1zaka1 d1s4qa\_  
d3tvta2 d1uf9a\_ d1khta\_ d1ckea\_ d1osna\_ d1p5zb\_ d3cm0a\_ d1tmka\_  
d1jaga\_ d3h86a\_ d1t0hb\_ d1nn5a\_ d2h92a\_ d3kb2a1 d2c95a1 d1yj5a2  
d1kgda\_ d1ly1a\_ d2ak3a1 d1vyva2 d1deka\_ d2grja1 d1p3ja1 d1y63a\_  
d1e4ya1 d1s96a\_ d3iija1 d1lvga\_ d1nksa\_ d1vyua2 d4e22a\_ d1qf9a\_  
d1jjva\_ d1q3ta\_ d1ki9a\_ d1lw7a2 d1teva\_ d1kjwa2 d1gsia\_ d1g3ma\_  
d1j99a\_ d1t8ta1 d1nsta\_ d1fmja\_ d1zrha\_ d1ls6a\_ d2a3ra\_ d1aqua\_  
d2zptx\_ d3ckla\_ d1texas\_ d1q44a\_ d2gwha\_ d1uj2a\_ d4gi7a\_ d2jeoa1  
d1rz3a\_ d1z0ja1 d3umra2 d3gj0a1 d2gaoa1 d1yzga1 d1x3sa1 d1g7sa4

d1puja\_ d1udxa2 d1kk1a3 d2o52a\_ d1jwyb\_ d1zcaa2 d1zcba2 d2fv8a1  
d2cjwa\_ d3dz8a1 d1xzpa2 d1vg8a\_ d4qxaa\_ d2ew1a1 d1x1ra1 d2bcgy\_  
d3doea1 d3cona\_ d3rega\_ d3wyga\_ d1upta\_ d2b6ha1 d1zd9a1 d1lnza2  
d1r5ba3 d1n0ua2 d1r2qa\_ d2f91a1 d2rhda\_ d3q3jb\_ d3q85a\_ d1efma1  
d1r8qa\_ d2gf9a1 d2akab1 d1ek0a\_ d1z08a1 d2gcoa1 d2dy1a2 d4g01b\_  
d2cxxa1 d1svia\_ d3q72a\_ d1ni3a1 d4ac9a4 d2erxa1 d2bmea\_ d1wxqa1  
d2gf0a1 d4ldja1 d1zunb3 d1d5ca\_ d4lv5b\_ d1efca3 d1kmqa\_ d2g6ba1  
d3lrpa\_ d1tada2 d2y8ea\_ d4rd4a1 d1z06a1 d2heia\_ d3a58b\_ d1u01a2  
d1d2ea3 d1zj6a1 d2ocba\_ d3rwoa\_ d1mr3f\_ d2e9sa1 d4u5xa1 d2iwra\_  
d2fn4a1 d3bwdd\_ d2nzja1 d2atva1 d2ksqa\_ d3l43a\_ d1mkya2 d1mkya1  
d1wmsa\_ d1jn3a3 d2rmka\_ d1f60a3 d1gota2 d1jala1 d2fh5b1 d1g16a\_  
d2wblc\_ d1m7ba\_ d1wf3a1 d1f5na2 d1t9ha2 d1z6xa1 d1z0aa1 d2fg5a1  
d2a5ja1 d2bcjq2 d1s0ua3 d1ky3a\_ d4y0va\_ d4lhwa\_ d2qmea1 d2atxa1  
d1legaa1 d1ryha\_ d1moza\_ d1nrjb\_ d2erya1 d3bfka\_ d1puia\_ d1fzqa\_  
d3j3az1 d3t5ga\_ d1shza2 d3defa\_ d2f7sa1 d3raba\_ d3tsoa\_ d3aq4a\_  
d2a17a1 d3sfva1 d3bc1a\_ d2ncda\_ d1sdma\_ d3h4sa1 d2heha\_ d2grya\_  
g3kin.1 d1br2a2 d1goja\_ d1f9va\_ d2mysa2 d1lkxa\_ d3t0qa\_ d4db1a1  
d3gbja\_ d1ry6a\_ d1v8ka\_ d1vava\_ d1luaia\_ d1k8ka2 d1k8ka1 d3uleb1  
d3i33a2 d3i33a1 d1bupa1 d1dkgd2 d1dkgd1 d4ci6a2 d1jcfa1 d4a2ba2  
d2fxua1 d1yaga2 d1yaga1 d4cbua2 d1bupa2 d3vrda1 d3vrda2 d1fcdc1  
d1h1oa2 d1h1oa1 d1m70a2 d1m70a1 d1iqca2 d1eb7a2 d1eb7a1 d1nmla2  
d1nmla1 d1nira1 d1qksa1 d3h1jd1 d1hroa\_ d4gedb\_ d3zooa\_ d1mz4a\_  
d1gu2a\_ d1f1fa\_ d1dvva\_ d1c6ra\_ d1c75a\_ d1e29a\_ d1gdva\_ d1cnoa\_  
d1h32b\_ d1co6a\_ d2bh4x\_ d2aiua\_ d5cytr\_ d1jdl\_ d1i8oa\_ d2zboa\_  
d3dmia\_ d1ls9a\_ d1wvec\_ d2yk3a\_ d3ph2b\_ d1dw0a\_ d5aura\_ d1ql3a\_  
d1qn2a\_ d1f1ca\_ d4zzva\_ d2xspa\_ d1leg1a\_ d4v20a\_ d1ojja\_ d4ipma1  
d4csia\_ d3pfza\_ d3ovwa\_ d2yoka\_ d2nqya\_ d1h4ga\_ d1hixa\_ d1oa2a\_  
d1olra\_ d3b7ma\_ d4h7ma1 d3wp3a\_ d2vgda\_ d1ligoa\_ d3zsea\_ d2nlra\_  
d3wx5a\_ d1oa3a\_ d1pvxa\_ d1m4wa\_ d1f5ja\_ d1oa4a\_ d4ixla1 d1evsa\_  
d1cnt1\_ d1pvhb\_ d1z7ca\_ d1huwa\_ d1bgea\_ d1rhga\_ d1f6fa\_ d1f45b\_  
d1i1rb\_ d1axia\_ d3tgxb\_ d1scfa\_ d2z3qa1 d3qb1a\_ d1hula\_ d1m48a\_  
d4nkqb\_ d1eera\_ d1v7mv\_ d5e4ea\_ d2o27a\_ d3b5ka\_ d2psma1 d4zf7a\_  
d3uf5a\_ d4dnxa2 d1m8pa2 d1g8fa2 d1jhda2 d1x6va2 d3rbaa\_ d2qtra\_  
d1nupa\_ d3l92a\_ d1f9aa\_ d1qjca\_ d2h29a\_ d1vlha\_ d1lod6a\_ d1lw7a1  
d1mrza2 d4ruka\_ d2e17a\_ d1iq0a2 d1irxa2 d1ivsa4 d2cyba\_ d1rqga2  
d1j09a2 d2yxna\_ d1f7ua2 d1h3fa1 d1ffya3 d2g36a1 d1nzja\_ d1jila\_  
d1n3la\_ d1i6la\_ d1pfva2 d1h3na3 d3n9ia\_ d3sz3a1 d3sw2a\_ d1moxc\_  
d1dx5i3 d1edmb\_ d1aut12 d1aut11 d1nqlb\_ d1dval1 d1szba2 d1kigl\_  
d2y5fl\_ d1ijqa2 d1gk5a\_ d1g1sa2 d1nt0a3 d1xdtr\_ d1lmja2 d1lmja1  
d1nzia2 d2wphe\_ d1klil\_ d1pfxl2 d1pfxl1 d1p9ja\_ d1g1ta2 d1f7ea\_  
d4yzub\_ d1nuba2 d2mgpa1 d1b9wa1 d2mgpa2 d1ob1c1 d1ob1c2 d1n1ia2  
d1n1ia1 d2npra2 d2npra1 d1qx2a\_ d1ig5a\_ d2y5ia\_ d1qlsa\_ d1psra\_  
d3n22a\_ d2egda\_ d4ggfc\_ d2wcea\_ d2luca\_ d4aqia\_ d3nsia\_ d2lp3a\_  
d1j55a\_ d1a4pa\_ d1k8ua\_ d1nsha\_ d1lexra\_ d1tiza1 d1nyaa\_ d1g8ia\_

d1ggwa\_ d1wdcc\_ d3fwba\_ d1ggza\_ d2o5ga\_ d1ctaa\_ d3i5gc\_ d1sl8a\_  
d1fpwa\_ d2scpa\_ d2roaa\_ d4aqra\_ d3pn7b\_ d1br1b\_ d2mysb\_ d1s6ca\_  
d1bjfa\_ d2obha\_ d1jfka\_ d1jf0a\_ d1qv0a\_ d1lkja\_ d2mlfc\_ d2m97a\_  
d2d8na\_ d4by5a\_ d1jbaa\_ d4nqga\_ d1wdcb\_ d2mysc\_ d1j7qa\_ d1s6ia\_  
d1uhka2 d1r2ua\_ d1dtla\_ d3kf9a\_ d3pn7c\_ d1gjya\_ d1y1xa\_ d1hqva\_  
d1dvia\_ d1df0a1 d4usla\_ d1k94a\_ d1wkya2 d1uuqa\_ d3wh9a\_ d4mlra\_  
d1xyza\_ d4xuya\_ d2je8a5 d4bf7a1 d3cuia\_ d1ur4a\_ d1qw9a2 d1lodza\_  
d2vzsa5 d1bqca\_ d2x2ya1 d1hjqa\_ d1qnra\_ d4y7ea1 d1vjza\_ d4k68a\_  
d2v3ga\_ d4hpga\_ d1nofa2 d1nq6a\_ d1h4pa\_ d1aq0a\_ d3ziza\_ d4bs0a\_  
d1ecea\_ d1h1na\_ d1ta3b\_ d1w91a2 d1ilwa\_ d1uhva2 d1us3a2 d1legza\_  
d7a3ha\_ d1tvna1 d3nyda1 d1ghsa\_ d2cyga1 d4xv0a\_ d2c8na2 d1w32a\_  
d3emca\_ d1v6ya1 d1foba\_ d2uwfa1 d2fgla\_ d3niya1 d2c0ha1 d1rh9a1  
d1yq2a5 d1szna2 d1fa2a\_ d1pama4 d5do8a1 d1ea9c3 d1hx0a2 d2fhfa5  
d1qhoa4 d1avaa2 d1m53a2 d4m8ua1 d2gjpa2 d1lwha2 d4howa1 d1ktba2  
d1j0ha3 d3vm5a1 d2x1ia\_ d1wzaa2 d1uasa2 d2diea1 d1mxga2 d1ht6a2  
d1eswa\_ d1iv8a2 d5cpsa\_ d1ud2a2 d1zjaa1 d3gbea1 d1kwa2 d1wdpa\_  
d1gcy2 d1g5aa2 d1hvxa2 d3dhp2 d2bhua3 d4do4a1 d3qgva1 d1e43a2  
d1g94a2 d2d3na2 d1gjwa2 d1gvia3 d1x1na1 d1r7aa2 d1tz7a1 d4toqa\_  
d1wb0a1 d1w9pa1 d1eoka\_ d1itxa1 d1kfw1 d1goia2 d1edqa2 d2gsja\_  
d1hjxa1 d1jnda1 d1vf8a1 d3wdpp1 d3wq5a\_ d1gnxa\_ d4gxpa\_ d4hz8a\_  
d1e4mm\_ d3aiua\_ d1wcca1 d1qvba\_ d3ahxa\_ d1v02a\_ d2dgaa\_ d1pbga\_  
d1vffa1 d1qoxa\_ d4ha4a\_ d1mixa2 d1e5wa2 d1j19a2 d1isna2 d2a16b2  
d3syxa1 d1mkea1 d2p8va\_ d1xoda1 d1i7aa\_ d1evha\_ d1qc6a\_ d1legxa\_  
d1x14a1 d1n9pa\_ d3vsqa\_ d2gixa1 d1b9ra\_ d1offa\_ d1frra\_ d3wcqa\_  
d1e9ma\_ d1wria\_ d1i7ha\_ d3av8a\_ d1czpa\_ d1rfka\_ d3p1ma1 d3b2ga\_  
d2bt6a2 d1wgqa1 d1v89a1 d2coda1 d1zc3b\_ d1wg7a1 d1u5ea1 d1v61a1  
d2coca1 d2ys1a1 d1v5pa1 d1ntya2 d1wjma1 d1wila1 d1u29a\_ d1xx0a1  
d1unqa\_ d2zkmx3 d1fhoa\_ d1v88a1 d2adza1 d1x1fa1 d1p6sa\_ d2coaa1  
d1btka\_ d1v5ma1 d2x18a\_ d1dyna\_ d1x1ga1 d4kaxb\_ d2j59m1 d1kilb2  
d1xcga2 d1txda2 d1u5da1 d1dbha2 d1wlha\_ d1upqa\_ d1v5ua1 d1foea2  
d2fjla1 d1eaza\_ d2dfka2 d2cofa1 d1kz7a2 d9ldta1 d2ewda3 d1up7a1  
d2dfda1 d1s6ya1 d1vjta1 d1hyea1 d1t2da1 d1ojsa3 d1b8pa1 d1ldna1  
d1hyha1 d1civa1 d2a92a1 d1ez4a1 d1i0za1 d1y6ja1 d1gv0a1 d1ur5a1  
d1ll1da1 d1obba1 d1v8ba1 d1gdha1 d2dlda1 d1mx3a1 d1ygya1 d1qp8a1  
d1li4a1 d1j4aa1 d2naca1 d1npya1 d3t4ea2 d1a4ia1 d1o0sa1 d2hk9a2  
d2egga2 d1b26a1 d1bvua1 d1gq2a1 d1c1da1 d1leha1 d1gtma1 d1euza1  
d1nvt1 d3dona2 d1edza1 d1vi2a1 d1p77a1 d1nyta1 d1b0aa1 d1v16a1  
d1v9la1 d1txga2 d3f47a1 d2pv7a2 d1xc2a3 d2ahra2 d4xiya1 d2f1ka2  
d1pgja2 d1i36a2 d1np3a2 d1lj8a4 d1teaa3 d1qmga2 d2i76a2 d2g5ca2  
d1wdka3 d1dlja2 d3cuma3 d1kola2 d1f8fa2 d1qora2 d1jqba2 d1vj0a2  
d1cdoa2 d1gu7a2 d1d1ta2 d1xa0a2 d2dm6a2 d1jvba2 d1rjwa2 d1llua2  
d1h2ba2 d1tt7a2 d1piwa2 d1o89a2 d1iz0a2 d1e3ja2 d1yb5a2 d1uufa2  
d1e3ia2 d3gpdg1 d1vc2a1 d2nvwa1 d1u8fo1 d1ydwa1 d1hdgo1 d2g17a1  
d1cf2o1 d2czca2 d1r0ka2 d1obfo1 d2cvoa1 d1ebfa1 d1h6da1 d1i32a1

d1zh8a1 d2q49a1 d1qkia1 d1j5pa4 d3pzra1 d1xeea1 d1vkoa1 d1vm6a3  
d3qvsa1 d2pkqo1 d1b7go1 d1gr0a1 d1p1ja1 d1lc0a1 d1j0xo1 d3pwka1  
d2hjsa1 d1zyao1 d1vkna1 d1t1ta1 d1nvm1 d3sjua\_ d3ojfa1 d1xu9a1  
d2jjya1 d1n7ha\_ d1y1pa1 d1h5qa\_ d1jtva\_ d4fs3a\_ d2bkaa1 d1gy8a\_  
d2c5aa1 d1ulsa\_ d1ooea\_ d2b69a1 d1y5ma1 d1spxa\_ d1ae1a\_ d1ydea1  
d1gega\_ d1hdoa\_ d1o5ia\_ d1e6ua\_ d1snya1 d2rhca\_ d3zv4a\_ d5ceja\_  
d2d1ya1 d1fjha\_ d3w8ea\_ d2fmua1 d1x1ta\_ d1rpna\_ d3ay7a1 d1k2wa\_  
d1eq2a\_ d2hrba1 d3ruaa\_ d2ew8a1 d4hwka\_ d1xgka\_ d2bd0a1 d1yo6a1  
d2a35a1 d2ntva\_ d1v18a\_ d1hdca\_ d4bkua\_ d2ag5a1 d2q45a\_ d1nffa\_  
d4iy1a\_ d1zbqa1 d1kewa\_ d1ek6a\_ d1ja9a\_ d2q46a2 d1iy8a\_ d1cyda\_  
d2ptga\_ d1hxha\_ d1uzma1 d3lyla\_ d4m89a\_ d3wyea\_ d2b11a1 d1w6ua\_  
d1sb8a\_ d2q2va\_ d4nr0a\_ d1e6wa\_ d2gasa\_ d3oiga1 d2bgka1 d1mxha\_  
d1v10a1 d1rkxa\_ d1r6da\_ d1wmaa1 d1e7wa\_ d2c07a1 d1xkqa\_ d3tzha\_  
d1g0oa\_ d3lz6a\_ d1qyca\_ d1ledoa\_ d1gz6a\_ d1oc2a\_ d1t2aa\_ d1zema1  
d2xoxa\_ d1z45a2 d1geea\_ d1p33a\_ d3lt0a\_ d4e6pa\_ d2wyua\_ d1db3a\_  
d4q9na\_ d1xhla\_ d4o1ma\_ d1fmca\_ d2uvda\_ d2gdza1 d1uaya\_ d2z1ma\_  
d2o23a2 d2fr1a2 d2fr1a1 d1qsga\_ d1qyda\_ d4zjua\_ d2a4ka1 d1ybl1a\_  
d1wvga1 d1yxma1 d3f4ba\_ d1mg5a\_ d1xg5a1 d1r55a1 d3gboa\_ d1atla\_  
d1buda\_ d4q11a\_ d1quaa\_ d1yp1a\_ d1wnia\_ g1y43.1 d1ex0a4 d1g0da4  
d2f4ma1 d1x3za\_ d3u1ra1 d1g9ka2 d1kapp2 d1t3ca\_ d1lepwa3 d2a97a\_  
d3f1ea\_ d3ioqa\_ d1fh0a\_ d1o0ea\_ d1khqa\_ d1m6da\_ d2cb5a\_ d1cs8a\_  
g8pch.1 d1s4va\_ d2pnsa\_ d1vsna1 d1mira\_ d1iwda\_ d2oula\_ d7pcka\_  
d3bwka\_ d3bcna\_ d2p86a\_ d1pvja\_ d1pcia\_ d1gece\_ d1deua\_ d4bs6a\_  
d1xkga1 d1cqda\_ d1jqpa2 d2c0ya\_ d2bdza\_ d3p5ua\_ d1zoya1 d1qo8a2  
d1d4ca2 d1chua2 d1jnra2 d1kf6a2 d2jk6a2 d2jk6a1 d1feca1 d1feca2  
d1lpfa1 d1lpfa2 d1xhca1 d1xhca2 d1dx1a2 d1dx1a1 d1gera2 d1m6ia2  
d1onfa1 d1onfa2 d3lada2 d1w4xa1 d1w4xa2 d1gesa2 d1mo9a1 d1xdia1  
d1f12a2 d1f12a1 d1fcda1 d1fcda2 d1h6va2 d1h6va1 d1mo9a2 d1gv4a2  
d1gv4a1 d2gv8a2 d2gv8a1 d1aoga1 d1aoga2 d1hyua1 d1ebda1 d1ebda2  
d3dk9a1 d1q1ra2 d1q1ra1 d1gesa1 d1zbf1a1 d2z1ha\_ d2etja1 d3qioa1  
d2e41a\_ d1j12a\_ d21sna1 d1io2a\_ d1uaxa\_ d2yv0x\_ d1mu2a1 d1lekea\_  
d1i39a\_ d1ps9a2 d1o94a2 d1lqta1 d1pn0a1 d1reo1 d2f5va1 d3c96a1  
d2gmha1 d1pj5a2 d1gpea1 d1o5wa1 d1n4wa1 d1k0ia1 d2dw4a2 d2ivda1  
d1seza1 d2voua1 d1kdga1 d1s5ja1 d2hbja2 d2igia\_ d1wlja\_ d1qhta1  
d4dlea1 d1tgoa1 d2f96a1 d3tr8a1 d3mxma\_ d1q8ia1 d1y97a1 d1w0ha\_  
d1kfsa1 d2py5a1 d1noya\_ d1d5aa1 d1yt3a3 d2guia\_ d3mwp1a1 d4kb1a\_  
d2y8ga\_ d1xkea1 d1k5db\_ d2y8fa\_ d1iv0a\_ d1nu0a\_ d2v76a\_ d1wj1a1  
d1aqca\_ d1qqga2 d1qqga1 d1ntva\_ d1n3ha\_ d4dbba\_ d3f0wa1 d1p3ra\_  
d1wgua1 d2cy4a1 d3hqca\_ d1wvha1 d1xr0b1 d3nvva1 d1krha3 d2h88b1  
d1n62a2 d1t3qa2 d1kf6b2 d1zoyb1 d1jq4a\_ d1ffva2 d1dgja2 d1rm6c2  
d1kx5b\_ d3a6na\_ d4m6ba2 d2nqbd\_ d3wkjd\_ d2yfwe\_ d4h9na\_ d5bnxa\_  
d1kx5c\_ d3r45a\_ d1eqzb\_ d4jjnb\_ d1f66c\_ d1eqza\_ d4wnnb\_ d1kx5a\_  
d1u35c1 d1id3a\_ d2nqbc\_ d1kx5d\_ d1tafa\_ d1tafb\_ d1jf1b\_ d1q9ca\_  
d1h3ob\_ d2byka1 d1n1ja\_ d4g92b\_ d1bh9a\_ d1jf1a\_ d1h3oa\_ d2bykb1

d1n1jb\_ d4mh8a\_ d1mu2a2 d4i7ga1 d1ig8a1 d1czan2 d1czan3 d1czan1  
d1ig8a2 d1czan4 d1bg3a4 d1bg3a2 d1bg3a1 d4ilya\_ d4olta\_ d1qgia\_  
d1qqya\_ d1gd6a\_ d1f6ra\_ d1livma\_ d2gv0a\_ d1iiza\_ d2z2fa\_ d1j8xa\_  
d1ghla\_ d1b9oa\_ d1741a\_ d1691a\_ d2o4wa\_ d1p37a\_ d1k28a3 d1xjta1  
d1jtma\_ d2f2qa\_ d4e97a1 d1g4ma1 d2pjsa1 d1klla\_ d2i7ra1 d1ecsa\_  
d1xqaa1 d5cj3a1 d1npba\_ d1jifa\_ d2p7oa\_ d1r9ca\_ d1nkia\_ d1mpya2  
d1kw3b2 d1kw3b1 d4ghga1 d1tfza1 d3isqa1 d3isqa2 d1sqia1 d1sqia2  
d1lkda2 d1lkda1 d1mpya1 d1cjxa2 d1cjxa1 d1sp9b2 d1t47a1 d1t47a2  
d1flua2 d1sp8a1 d1sp8a2 d1etob\_ d1umqa\_ d1s5ja2 d1qhta2 d4dlea2  
d1tgoa2 d3py8a2 d1q8ia2 d1kfsa2 d2py5a2 d1d5aa2 d1qsta\_ d2beia1  
d4m3sa\_ d1u6ma1 d1yk3a1 d3dr6a\_ d1xmta\_ d1z4ea1 d2ge3a1 d1bo4a\_  
d2fiaa1 d2jdca1 d1y9wa1 d3to7a\_ d1wwza1 d2fl4a1 d2ozua1 d2b5ga\_  
d2cy2a1 d2p0wa\_ d1cm0a\_ d4pswa\_ d1yrea1 d1yr0a1 d1m4ia\_ d2gana1  
d1yvka1 d1ghea\_ d2g3aa1 d1y7ra1 d2euia1 d1q2ya\_ d2fsra1 d1xeba\_  
d2ae6a1 d1cjwa\_ d1qsma\_ d2aj6a1 d1y9ka1 d1i12a\_ d1vkca\_ d2atra1  
d1n71a\_ d2d4pa1 d2fiwa1 d2fe7a1 d1tiqa1 d2ou2a\_ d1yx0a1 d2fcka1  
d1p0ha\_ d2j8ma\_ d2pq8a\_ d1z4ra1 d1s3za1 d1ufha\_ d2hqya1 d2hqya2  
d1ne9a1 d1lrza3 d1ne9a2 d1e88a1 d1l6ja4 d1eaka4 d1eaka3 d1l6ja3  
d1h8pa2 d1h8pa1 d1etha2 d1w52x1 d2ppla1 d1hpla2 d1lpbb2 d2oxea1  
d1rpla2 d1lys1x\_ d4hs9a\_ d1ex9a\_ d1ku0a\_ d3qmma\_ d1dgsa2 d1fvia1  
d1ckma1 d1x9na2 d2ftba\_ d1mpa\_ d2rcqa1 d1fdqa\_ d4lkpa\_ d1sa8a\_  
d1vyfa\_ d1lpja\_ d3vg7a1 d4azqa1 d1o8va\_ d5bvqa\_ d1p6pa\_ d2qo4a\_  
d1yiva1 d1o1va\_ d4bvma1 d4tkba\_ d4i3ba\_ d1bwya\_ d1ftpa\_ d1ggla\_  
d4gkca\_ d1cbia\_ d3p6da1 d1kqwa\_ d2a0aa1 d3zxha\_ d1cgl\_ d1rm8a\_  
d1eaka2 d1hy7a\_ d2jsda\_ d1cxva\_ d1hv5a\_ d1i76a\_ d3p0ya1 d1igra1  
d1igra2 d1n8yc2 d1n8yc1 d1m6ba2 d1m6ba1 d3gv5b1 d1t94a2 d3bq0a2  
d2tbvc\_ d1c8nc\_ d1x36a\_ d1smvc\_ d1ng0c\_ d4sbvc\_ d1lopoa\_ d1f2nc\_  
d1cixa\_ d1y29a\_ d1v7fa\_ d2jtba\_ d1d1ha\_ d1g9pa\_ d1lupa\_ d1qk7a\_  
d1mb6a\_ d2a2va\_ d1niya\_ d1i25a\_ d2mpqa\_ d1ie6a\_ d1kqha\_ d1la4a\_  
d2mxoa1 d1d10a\_ d1koza\_ d1qk6a\_ d1emxa\_ d1lqra\_ d1c6wa\_ d1rmka\_  
d1ixta\_ d1eyoa\_ d1cna\_ d1fu3a\_ d1f3ka\_ d1fyga\_ d1rypd\_ d1irua\_  
d1rypc\_ d3unfk\_ d1rypa\_ d1j2pa\_ d1irui\_ d1j2qh\_ d3unfh\_ d1m4ya\_  
d1rypb\_ d1irul\_ d1irug\_ d1liru2\_ d1q5rh\_ d1rypg\_ d1g3ka\_ d1liruf\_  
d1q5qa\_ d1e94a\_ d1lirub\_ d1ryph\_ d3ty6a\_ d1liruj\_ d1liruk\_ d1rype\_  
d1lirud\_ d1lirue\_ d3mi01\_ d1rypf\_ d1liruh\_ d2z3ba\_ d1liruc\_ d3mka2\_  
d1lirul\_ d1ny721 d1ny722 d1a6ca3 d1a6ca2 d1a6ca1 d1pgl22 d1pgl21  
d1ny711 d1jgta2 d1ea0a3 d1ecfa2 d1q15a2 d1ct9a2 d1ao0a2 d1te5a\_  
d3ubub\_ d1legia\_ d1qo3c\_ d1v7pa\_ d1tdqb\_ d3ubua\_ d1c3ab\_ d1h8ua\_  
d3bx4b\_ d1t8ca1 d1sb2a1 d1qdda\_ d2ziba1 d3cada\_ d1byfa\_ d1j34b\_  
d1jwia\_ d1jzna\_ d1c3aa\_ d1wmza\_ d3bdwb\_ d1hq8a\_ d1fifa1 d1dv8a\_  
d3hupa\_ d1wk1a1 d1umra\_ d2afpa\_ d3bx4a\_ d1gz2a\_ d1sl6a\_ d1v7pb\_  
d3g8ka\_ d1ixxa\_ d1j34a\_ d1jwib\_ d1g1sa1 d1y17a1 d1ja3a\_ d1fvub\_  
d3bdwa\_ d1sb2b1 d1fvua\_ d1umrc\_ d1oz7a\_ d4m17a\_ d3cfwa1 d1ypqa1  
d1g1ta1 d3fd4a\_ d3l9jc\_ d4dn8a1 d1v41b\_ d1rdl1\_ d2msba\_ d4lt9a1

d3tc7a1 d3hoja\_ d3vnda\_ d3n18a1 dlgeqa\_ d3naval d1v5xa\_ d4a2ra1  
d3tc6a1 dlujpa\_ d4ijba\_ dlxcfa\_ dlvc4a\_ dlrd5a\_ dlqopa\_ d3b5va\_  
d2r80b\_ d1cqxa1 d1cg5a\_ d1gcvb\_ d3boma\_ d2h8fb\_ d2raoa\_ d3bj1a\_  
d4hrrb\_ d2r50a\_ d3d1kb\_ d2aa1b1 d3zhwa\_ d3hf4b\_ d3gdja\_ dljebb\_  
d3bj1b\_ d1x9fb\_ d1wmub\_ d1gcva\_ d3bcqb\_ d3d4xb\_ dlgvha1 d2dc3a\_  
d3hf4a\_ d4yu3a\_ d3k8ba\_ d1qpwb\_ d2r80a\_ d3bcqa\_ d1v4wa\_ d3wtgb\_  
dlj17a\_ d4esaa\_ d1a9we\_ d3d1ab\_ dlfs1a\_ d4h21a\_ d1v4wb\_ dlmwca\_  
d1vhba\_ dljeba\_ dlspgb\_ dlh97a\_ dlq1fa\_ d1tu9a1 d3d1aa\_ dlhdsb\_  
d3hyub\_ d2zfb\_ d3fs4a\_ d1oj6a\_ dlshrb\_ d4h21b\_ d4yu3b\_ dlspga\_  
d3hrwa\_ d3qqra\_ d3at5a\_ d4wchd\_ d3hyua\_ d1cg5b\_ dluc3a\_ dlhbra\_  
d2raob\_ d4esab\_ d3gdjb\_ d3qqqa\_ dlx9fc\_ d3vrfa\_ dlitha\_ d3mkba\_  
d3d4xa\_ d3mjpa\_ dlj16a\_ d3fh9a\_ dlouta\_ d2dc3b\_ dlit2a\_ d3eoka\_  
d3g46a\_ dlqpwa\_ d3vrfb\_ dlch4a\_ dlx9fd\_ dlhdsa\_ d2zfb\_ d3mkbb\_  
dlor4a\_ d3wtga\_ d1a4fa\_ d3fh9b\_ d3bomb\_ d3cy5a\_ d3at5b\_ dlx9fa\_  
d2oifa\_ d4lmb\_ dlcpcb\_ d3v57a\_ dlkn1a\_ dlcpca\_ d4f0ta\_ d2vjha\_  
d4po5b\_ d1eyxa\_ dl1alla\_ d4f0tb\_ dl1b33b\_ d4h0mb\_ dl1b33a\_ d2vjhb\_  
d4lmb\_ d2vmlb\_ dl1allb\_ d2vjta\_ d3dbja\_ d2vmla\_ d2vjtb\_ d4f0ub\_  
dlf99b\_ d4rmpa1 dl1liaa\_ d1eyxb\_ d2uulb\_ d4lmsb\_ d4f0ua\_ d2bv8a\_  
dlf99a\_ d2bv8b\_ d2c71b\_ d3dbjb\_ d4rmpb1 dl1b8da\_ d4h0ma\_ d3v57b\_  
dlkn1b\_ dl1liab\_ d2uula\_ d2j96a\_ dlkyqa1 glgxs.1 glwht.1 dlazwa\_  
dlmtza\_ d2qvba\_ d2v9za\_ d4kafa1 d4iuua3 d4bvva\_ d5hpga\_ d3k65a\_  
dlki0a3 dlki0a2 dlki0a1 dl1a0ha1 dlpmla\_ d3sp8a3 d2feba1 dlxova2  
dlf74a\_ d3l21a\_ d2e1da\_ dl1to3a1 dlw3ia\_ dl1sfla\_ dl1n7ka\_ dlvcva1  
d4imea\_ dlwa3a\_ d2ocza1 dl1f2ja\_ d3m16a\_ d2yxga\_ d3a5fa\_ dl1fbaa\_  
dl16wa\_ dl1xfba1 dl1wx0a1 dl1vpxa1 dl1ojxa\_ dl1mxsa\_ d2a4aa1 dl1xkya1  
d3cq0a1 d3s1xa\_ dl1f05a\_ dl1fdja\_ d3cpa1 d4d2ja\_ dl1cg2a1 dl1yloa2  
dl1y7ea2 dl1y0ya3 dl1lfwa1 dl1vixa1 dl1fnoa4 dl1vhoa2 dl1ysja1 dl1vhea2  
dl1z21a1 d2fvga2 dl1vgya1 dl1r3na1 d2grea2 dl1xmba1 dl1rtqa\_ d3rp2a\_  
gl1ucy.1 dl1fuja\_ d2zchp\_ d3w94a\_ dl1si5h\_ dl1lo6a\_ g2pka.1 dl1cgha\_  
dl1kigh\_ dl1a5ia\_ d3s9ba\_ dl1hj8a\_ dl1ao5a\_ d2anya\_ dl1q3xa1 dl1gvza\_  
dl1azza\_ d4gsoa\_ d2f91a1 dl1liaua\_ dl1gdna\_ dl1eufa\_ gl1fiw.1 dl1eq9a\_  
d4nfea\_ d2rdla\_ dl1spja\_ dl1elva1 dl1a7sa\_ dl1ekbb\_ dl1pfxc\_ dl1yc0a\_  
d2aiqa\_ gl1fiz.1 dl1fi8a\_ d4k60a\_ d4dgja\_ dl1mzaa\_ dl1op0a\_ d3tjva\_  
dl1pytd\_ dl1sgfg\_ gl1gg6.1 d2eeka\_ gl1rtf.1 dl1a0ja\_ d3g01a\_ dl1pytc\_  
d4e7na\_ dl1ddja\_ dl1z8ga1 d2hlca\_ dl1npma\_ dl1brup\_ gl1jou.1 dl1sgfa\_  
dl1autc\_ g2hnt.1 gl1kdq.1 dl1orfa\_ d3s69a\_ d4crga\_ dl1fxya\_ dl1bqya\_  
dl1svpa\_ dl1mbma\_ d3su6a1 dl1cula1 d4agka\_ dl1q31a\_ gl1n11.1 d3e90b\_  
dl1ep5a\_ d3u1jb\_ dl1m41a\_ d2bk7a\_ d3fjua\_ dl1z5ra1 dl1kwma1 dl1uwya2  
dl1jqga1 d2c1ca1 dl1dtda\_ dl1h81a2 d3lgia\_ d3i77a\_ d2z9ia2 d4nsva\_  
dl1lcya2 d4jcna\_ dl1os8a\_ dl1hpga\_ dl1p3ca\_ dl1l1ja\_ dl1qtfa\_ dl1e69a\_  
dl1mv5a\_ d3g60a4 gl1ii8.1 dl1ewqa2 dl1ji0a\_ dl1qhla\_ dl1v43a3 d2wmfa1  
dl1vpla\_ dl1g2912 d4a82a2 gl1f2t.1 d2d62a1 d3tuic1 d2bbsa1 d3g60a3  
d2ixea\_ dl1g6ha\_ dl1sgwa1 d2qi9c\_ d3rlfa1 d3b60a1 d3d31a2 d2pzea1  
gl1xew.1 dl1jj7a\_ dl1oxk2 d2onka1 dl1wlwa\_ dl1iwea\_ dl1qf5a\_ dl1vmaa2



dlnija1 dlnp6a\_ d2p67a1 d3ihla\_ dlokkd2 d1ls1a2 d1slma2 dliona\_  
d2v40a\_ d1dj3a\_ d3hida\_ d2vola1 d2g0ta1 d1vcoa2 d1j8mf2 dlq3qa\_  
d1xjca\_ d1p9ba\_ d1qzxa3 d1ihua2 d1ihua1 d2qm8a\_ d1dj2a\_ d4ioja\_  
d1cp2a\_ d1yrba2 d3gqba2 d1skye3 d1xp8a1 d1tf7a2 d1tf7a1 d1ye8a1  
d1skyb3 d2qe7d2 d4blta\_ d4huta\_ d3ltaa2 d4hyya\_ d2i3ba1 d1crla\_  
d3j9tb2 d3ntua2 d1vdza1 d2z43a\_ d1e9ra\_ d1nlfa\_ d3ziaa2 d1n0wa\_  
dlg6oa\_ d3ziad2 d3j9ta2 d3gqbb2 d2i49a\_ d1nnfa\_ d1xvxa\_ dlursa\_  
d1h3da1 d1iuda\_ d4m1va1 d1twya\_ d3e13x\_ d2nxoa1 d4pfua\_ d3ttma\_  
d1elja\_ d2qmwa1 d1us5a\_ d1y3na1 d1jeta\_ d1uqwa\_ d4f19a1 d2esna2  
d3thia\_ d3fasa1 d2uyeb\_ d2xwva1 d1r9la\_ d2fyia1 d1pb7a\_ d2ozza1  
d1sw5a\_ d1nh8a1 d1vr5a1 d2g29a\_ d1xs5a\_ d3lswa\_ d2z23a\_ d3w9va\_  
d3tcha\_ d1q35a\_ d1z7me1 d3q27a\_ d1p99a\_ d1ve4a1 d2i6ea1 d4mcoa1  
d4n8ya\_ d1eu8a\_ d1zbma1 d1hsla\_ d1ixca2 d1j1na\_ d1xvya\_ d1y9ua\_  
d2z22a1 d1xoca1 d4oera\_ d1wdna\_ d5f1qa1 d1xt8a1 d1i6aa\_ d4gwoa\_  
d4igta1 d1pc3a\_ d4mmpa1 d1o63a\_ d2czla1 d2onsa2 d4mija1 d4ok5a1  
d2bmfa1 d2bmfa2 d1yksa1 d1yksa2 d1jr6a\_ d2qeqa1 d2jlqa1 d1a1va2  
d1eh3a\_ d3skpa\_ d1dtza1 d1dtza2 d1ieja\_ d1jnfa2 d1ce2a1 d1jnfa1  
d1b1xa2 d1b1xa1 d1jw1a1 d1ryoa\_ d1h76a1 d1h76a2 d1c4oa1 d2p6ra3  
d2p6ra4 d1oywa2 d1wrba1 d1w36b2 d1w36b1 d1c4oa2 d3bora\_ d1t6na\_  
d2eyqa5 d2eyqa3 d2eyqa2 d2zu6a2 d1veca\_ d1uaaa1 d1w36d1 d2g9na1  
d1z3ix2 d2rb4a\_ d1hv8a1 d1hv8a2 d1t5ia\_ d1w36c2 d2j0sa2 d2j0sa1  
d1fuka\_ d3hjha1 d1z5za1 d1qdea\_ d1z63a1 d1s2ma2 d1s2ma1 d1wp9a1  
d1wp9a2 d1gm5a3 d1gm5a4 d3dina4 d3dina3 d1q0ua\_ d1w36c1 d1z3ix1  
d1nkta3 d1nkta4 d1uaaa2 d1w36d2 g1qhh.1 d2fwra2 d2fwra1 d2v8ta\_  
d3q3ma\_ d1za0a1 d1mxra\_ d2inca\_ d1jk0a\_ d2incb\_ d1mhyb\_ d3hf1b\_  
d1r2fa\_ d2uw1a\_ d1mhyd\_ d3n37a\_ d1afra\_ d1oquc\_ d1syya\_ d1mtyd\_  
d2o1za\_ d1uzra\_ d1smsa\_ d2fkza\_ d1zuja1 d1s3qa1 d2fjca1 d1z6om1  
d1veia\_ d4dyya\_ d1jiga\_ d3gvya\_ d2pyba\_ d4cy9a1 d3bvfa1 d1r03a\_  
d2cf7a\_ d1nf4a\_ d1zs3a1 d4iwka\_ d3ka8a\_ d3np0x\_ d1l1b3a\_ d4e6ka\_  
d1z6oa1 d2fzfa1 d4dyua\_ d3ge4a\_ d1jgca\_ d4am4a\_ d2z6ma\_ d1ji5a\_  
d1vlga\_ d1lkoal d1krqa\_ d3qz3a\_ d1o9ra\_ d2ffxj\_ d1euma\_ d1yv1a1  
d2v2pa\_ d1j30a\_ d4di0a\_ d1dpsa\_ d2cbia2 d1gqia1 d2choa2 d1oewa\_  
d2qzxa\_ d2asia\_ d1psoe\_ d1miqa\_ d1smra\_ d2h6ta\_ d1pfza\_ d1izda\_  
d3hd8a\_ d1j71a\_ d1dpja\_ d4aa9a\_ d1t6ex\_ g1b5f.1 g1lya.1 g1htr.1  
d1qdma2 d1bxoa\_ d1wkra\_ d1tzsa\_ d1libqa\_ d2qzwa\_ d1ex4a2 d1bdqa\_  
d3ggta\_ d3ixoa\_ d1mrxa\_ d2haha\_ d1tw7a\_ d4njja\_ d1sgua\_ d2p3da\_  
d1nsoa\_ d3d3ta\_ d2rkfa\_ d1c6ya\_ d2rspa\_ d3ogpa\_ d3ekwa\_ d2o4na\_  
d2j9ja\_ d1baia\_ d3ggua\_ d3l1zua\_ d4npua\_ d4j55a\_ d2r8na\_ d2fxda\_  
d2p3ca\_ d4dqea\_ d3ttpa\_ d3t3ca\_ d2p3aa\_ d2hc0a\_ d2fdda\_ d3mwsa\_  
d1wgda1 d1wggal d4q5eb\_ d1wjna1 d1se9a\_ d3n3kb\_ d1wz0a1 d1we6a1  
d2m0xa\_ d2gbka\_ d3rt3b1 d1wh3a1 d1sifa\_ d2ekek2 d4ii2b1 d4hk2a1  
d1c3ta\_ d1wgha1 d1ttna1 d1j8ca\_ d1wx8a1 d3v6cb1 d2ma9b\_ d4i6lb1  
d1bt0a\_ d2jvca1 d1iyfa\_ d2k1fa\_ d1wxva1 d1wf9a1 d1t0ya\_ d2io0b2  
d1x1ma1 d2gbma\_ d1zw7a1 d2m17a\_ d1ud7a\_ d1we7a1 d2l1wpa\_ d2gbja\_

d1wjua1 d1v6ea1 d1v86a1 d4eewa\_ dlwiaa1 d4icva\_ d4gu2a\_ d1wx7a1  
d1wy8a1 d4hjka1 d2faza1 d1v5oa1 d3ruib\_ d1eo6a\_ d3waob\_ d2r2qa1  
d3m95a\_ d3wana\_ d1epwa1 d4lu0a\_ d3unda1 d3e9aa1 d1vr6a2 d1n8fa\_  
d2qkfa\_ d1d9ea\_ d1o60a\_ d2h0ba\_ d2erfa\_ d1h30a1 d3mw4a1 d1pz7a\_  
d2r1ba\_ d3v64a1 d1d2sa\_ d3bopa1 d3mw3a1 d1okqa1 d1okqa2 d1wioa4  
d1ccza2 d1vcaa1 d1dr9a2 d2d9qb1 d2nxyb2 d1um8a\_ d1ixza\_ d1qvra2  
d1qvra3 d1qzma\_ d1sxjc2 d1jr3d2 d2p65a\_ d1l8qa2 d1g8pa\_ d3hu3a3  
d1sxjd2 d1njfa\_ d1in4a2 d1sxja2 d1tuea1 d2ce7a2 d1w5sa2 d1sxjb2  
d1d2na\_ d1ny5a2 d1ofha\_ d2gnoa2 d2a5yb3 d1fnna2 d1u0ja1 d1lv7a\_  
d2fnaa2 d1ixsb2 d4gita\_ d1sxje2 d1g41a\_ d2e3fa\_ d1mm0a\_ d2e3ea\_  
d2llda\_ d2ny8x\_ d2e3ga\_ d2ny9x\_ d2nz3a\_ d3ia2a\_ d1a88a\_ d4dgqa1  
d1zoia\_ d2k4ua\_ d1hp2a\_ d2lu9a\_ d1baha\_ d2meoa1 d1wm7a\_ d1hlya\_  
d1n8ma\_ d1jlza\_ d1wpda\_ d1c55a\_ d1pvza\_ d1wt7a\_ d1wz5a\_ d1m2sa\_  
d1pjva\_ d1c49a\_ d1qkya\_ d2ktca1 d1wmta\_ d1du9a\_ d1j5ja\_ d1rlga\_  
d1t0za\_ d2i61a\_ d1t1ta\_ d1sn4a\_ d1kv0a\_ d2lkba\_ d1npia\_ d1wwna\_  
d1pe4a\_ d2kbka\_ d2li7a\_ d2kbha\_ d1dq7a\_ d1sega\_ d1omya\_ d1zywa1  
d1jzaa\_ d2jca\_ d1bnla\_ d1iyjb4 d1iyjb5 d1iyjb3 d1o7ia\_ d4ipca1  
d1x3ea\_ d4apva\_ d1jb7a1 d1jb7a2 d1jb7a3 d3kdfa\_ d1ue1b\_ d1wjja1  
d3eiva\_ d1xjva2 d1xjva1 d2ccza2 d1se8a\_ d1lloc\_ d1jb7b\_ d1qvca\_  
d3ulla\_ d1qzga\_ d1miau4 d1miau5 d3g48a1 d1gd7a\_ d1jjcb3 d1pyba\_  
d1y14b1 d2nn6i1 d1i941\_ d2zjra2 d1smxa\_ d2qamc2 d1hh2p1 d2r7da1  
d1rl2a2 d1wfga1 d3bzka4 d1x6oa2 d3a0ja\_ d2j01d2 d2ja9a1 d4q15a\_  
d1hr0w\_ d1luza\_ d2n3sa\_ d2vnud1 d1h95a\_ d1go3e1 d2nn6h1 d1ne3a\_  
d2mola\_ d1iz6a2 d1jjga\_ d1e3pa2 d2ix0a3 d2ix0a2 d2lxja\_ d1ueba3  
d1ueba2 d2z0sa1 d1u0la1 d2ix0a1 d2eifa2 d2je6i1 d3i2za1 d2c35b1  
d2ahob2 d1t9ha1 d3i4oa\_ d2qall1 d1jt8a\_ d2nn6g1 d1g6pa\_ d3cama\_  
d1i94q\_ d1c9oa\_ d1d7qa\_ d2ba0a1 d2vnud2 d2vnud3 d1khia2 d2qalq1  
d1wi5a1 d1xtda2 d1ny4a\_ d1dzka\_ d4tlja\_ d2a2ua\_ d4wfva\_ d3t1da\_  
d4iixa\_ d3zq3a\_ d2nnda\_ d1i4ua\_ d1kxoa\_ d1bbpa\_ d1exsa\_ d3s26a1  
d1lf7a\_ d1qfta\_ d4gh7a\_ d1z24a1 d1qabe\_ d1xkia\_ d1ew3a\_ d3bx7a\_  
d4iawa1 d1n0sa\_ d1gkab\_ d3kzaa\_ d2k23a\_ d2l9ca1 d2joza1 d1gm6a\_  
d3kffa\_ d3saoa1 d1e5pa\_ d1yupa1 d1iiua\_ d1pfsa\_ d2a1ka\_ d1je5a\_  
d1rpma\_ d2shpa1 d1yfoa\_ d1l8ka\_ d2ooqa1 d1g4us2 d1p15a\_ d1lara2  
d1lara1 d1wcha\_ d2fh7a2 d2fh7a1 d1ohea1 d1ohea2 d2f4da\_ d1rxda\_  
d2hxpa\_ d1xria\_ d1fpza\_ d3ezza\_ d4y2ea\_ d1i9sa\_ d3azya\_ d3wvja\_  
d1upsa1 d1ajoa\_ d2hyka\_ d1ajka\_ d2vy0a\_ d1o4ya\_ d3o5sa\_ d3d6ea\_  
d3atga\_ d1umza\_ d3i4ia\_ d1c1la\_ d4l1bqa\_ d1a78a\_ d1slta\_ d4no4a\_  
d3zsja\_ d3duia\_ d1is3a\_ d1qmja\_ d1hlca\_ d1tdha3 d1q3ba3 d1ee8a3  
d1k82a3 g1qmo.1 g1len.1 d3zyra\_ d1fnya\_ d1n47a\_ g2ltn.1 d1avba\_  
d3usua\_ d1dhkb\_ d1f9ka\_ d1lukga\_ d1g8wa\_ d1g9fa\_ d1wbfa\_ d3wcsa\_  
d1g7ya\_ g1loe.1 d1mvqa\_ d1hq1a\_ d1dbna\_ d1qnwa\_ d1fx5a\_ d4l8qa\_  
d1ioaa\_ d3n35a\_ d3ubra\_ d1qo8a1 d1d4ca1 d2k3va\_ d1ft5a\_ d1qdba\_  
d1mlqa\_ d2j7aa\_ d1h21a\_ d1ogyb\_ d4fasa\_ d1jnia\_ d1oaha\_ d1sp3a\_  
d3h33a\_ d1rwja\_ d19hca\_ d1os6a\_ d3bxua\_ d3h4na\_ d1i77a\_ d3caoa\_

d1j0pa\_ d2ctha\_ d1duwa\_ d1lofwa\_ d2e84a\_ d1hh5a\_ d3h34a\_ d1dszb\_  
d1a6ya\_ d3cbba\_ d1ynwa1 d1r4ia\_ d1hcqa\_ d2hana\_ d2hanb\_ d2enva1  
d1kb4b\_ d1lo1a\_ d1cita\_ d1adqa1 d1fnga1 d1uvqb1 d1zs8a1 d2vola1  
d2vola2 d1mfb12 d2jelh2 d1uwel2 d3qq4b1 d1kjvb\_ d1k5na1 d1osph2  
d4odh12 d1ow0a1 d1ow0a2 d3l9ra2 d3jtth1 d2fath2 d4elkb2 d1fn4b2  
d2xfxb\_ d1pg7x2 d1cqka\_ d4k71b2 d1lk2a1 d1leapb2 d4lfhg2 d1i4fa1  
d2nw2a2 d1kfah2 d1mhca1 d1h3ua1 d1wejh2 d1h0db2 d1a5fh2 d1kcvh2  
d1mjuh2 d1qqda1 d1kcrh2 d1k8ia1 d3huja2 d2nnab1 d1nfd2 d3mffb2  
d1s9va1 d1lk3h2 d1q0x12 d1fv1b1 d1neza1 d4rfeb2 d1r3ha1 d1a6tb2  
d1kjva1 d1pz5b2 d1onqa1 d2bc4a2 d1de4a1 d1k8da1 d1tcra2 d1dn0b2  
d1nfd2 d2xwtb2 d1bfoa2 d1mexh2 d1iakb1 d1ypzf2 d4f7ea2 d1q72l2  
d2fbjh2 d1fe8h2 d1clzh2 d1fngb1 d1uvqa1 d1vgka1 d1c16a1 d4j12a2  
d4x99b2 d1igtb3 d1je6a1 d1q72h2 d1nldh2 d1teth2 d2hmic2 d1i1ca2  
d1i1ca1 d1k8ib1 d1q0yh2 d1kfa12 d3frua1 d1pg7w2 d1u58a1 d1igyb4  
d1igyb3 d1hyrc1 d1klub1 d1deeb2 d1c12b2 d2bc4b2 d2ig2h2 d1kcv12  
d3wn5b1 d1lk2b\_ d1lk3l2 d1mjul2 d1sm3h2 d1q0xh2 d1zvsal d1ydpal  
d1u8ib2 d1ypze2 d1kcuh2 d1op9a\_ d1y0la1 d1letzb1 d1legj11 d2gsib1  
d1nj9a1 d4jfh1 d1aqk11 d1t2ja\_ d1lo4h1 d1zvya1 d3v4v11 d4enec1  
d1kxtb\_ d5e8ea1 d2pxya\_ d4weud\_ d1xiwc\_ d2esvd1 d1qznh\_ d1ogae1  
d1f4xh1 d4n1hb\_ d3ezjb1 d3mlw11 d1kfah1 d1etza1 d1b4jh1 d3cfic\_  
d4w68a\_ d2arja1 d1ek3a\_ d2ok0l1 d1vera\_ d1uwgh1 d1blnb1 d1fpth1  
d1rzga1 d2giya1 d4m3kb1 d1nc2a1 d2nyyd1 d1ncna\_ d1fbih1 d5dxwa\_  
d4fqqa1 d1dqdh1 d1jfq11 d1kelh1 d1faih1 d1frgl1 d1figl1 d4m6n11  
d1fo0a\_ d4hxb11 d3b5ga\_ d3quyd1 d2h9gb1 d1i8kb\_ d2dd8h1 d2ck0h1  
d1eaja\_ d4w6wb1 d2a6ib3 d1t66d1 d2e27h\_ d1ob1b1 d1f11b1 d2v7na1  
d2xt1b1 d1pskh1 d4i13b1 d2op4l1 d1a0q11 d1uwel1 d1za3a1 d1ncb11  
d4uu9a\_ d1bm3h1 d1cloh1 d1nqba2 d1cf8h1 d4y5va\_ d1mhph1 d5anma1  
d4cdgc1 d4ldeb\_ d1y0lb1 d2pcpb1 d1z3gl1 d1dfb11 d1fh5h1 d3g5xa1  
d1tzib1 d4dn3l1 d3zhka1 d2b1hh1 d2uyla1 d1f3dh1 d1nj9b1 d2agjh1  
d2h1p11 d1q72h1 d8fabb1 d1ndmb1 d1rjca1 d4u6hb1 d3upca\_ d2fbj11  
d1osph1 d1tvda\_ d2cjev\_ d4fhbd1 d1bd2d1 d1rz7h1 d3nn8a\_ d1blna1  
d1knoa1 d1nfda1 d2bmkb1 d1dq11\_ d1igyb1 d1igf11 d12e8h1 d3utza1  
d1nc2b1 d1rihh1 d4mwfb1 d4jvpa1 d1mieh1 d1rhfa1 d1fgn11 d1sbs11  
d1lp9e1 d1dn0a1 d4lqf11 d1iaih1 d1kgcd1 d1mh5b1 d1gp011 d2g60h3  
d1f8t11 d2jixd1 d4grwh\_ d1fo0b\_ d1bfob1 d1axsa1 d1u9ka\_ d1nmbh\_  
d1h8na1 d1h8na2 d1jguh1 d4eura1 d3sdy11 d35c8h1 d1w72l1 d1mvub\_  
d1i9rh1 d1ob1a1 d4wenb\_ d1yeeh1 d3ietc1 d1f58h1 d1ad0b1 d1mqk1\_  
d1nbvh1 d4b50a\_ d3r8bb\_ d1baf11 d1mamh1 d4rgne1 d2gsgb\_ d35c8l1  
d1bafh1 d1ai1h1 d2pcpa1 d2fath1 d2x1pa\_ d1orsb1 d1ibgl1 d1shma\_  
d1a2yb\_ d1u0qa\_ d2coqa\_ d1hilb1 d1qfwi\_ d1jv5b\_ d1fn4b1 d5e0qa\_  
d1nsnh1 d1plgl1 d4ocx11 d1kb5h1 d1rzhf1 d1pg7x1 d2fx7h1 d2oi9c\_  
d1l7il1 d3eyva1 d1d5il1 d4ffyl\_ d1tet11 d1a6wh\_ d1lac6a\_ d3dvfa\_  
d1nfd2 d1mimh1 d1ri8a1 d1jhlh\_ d3dura\_ d1fskb1 d1f97a1 d3so3b1  
d2ak4d1 d1lp9f1 d4z7wf1 d1l7th1 d4y5ya\_ d4x7ec1 d1emth1 d1likf11

d1nlbh1 d4utal1 d1bjma1 d1leapb1 d1u6ah1 d2dtgd1 d1kj2b\_ d1xeda1  
d1c1eh1 d1fgvh\_ d2bnub1 d2fb4h1 d2dtgb1 d1ktrh\_ d1jpth1 d1qkz11  
d4hepg\_ d2atpb1 d1flrh1 d2hrpl1 d1mvfa\_ d1iaim1 d3k80a1 d2jb5h1  
d3zkxc\_ d4grwe\_ d1lit9h1 d1rhhb1 d3w9ec\_ d1e4wh1 d1sy6h1 d2j6eh1  
d3qxta\_ d1jglh1 d1p7ka1 d1tzhb1 d4n8pa1 d1gaf11 d2jelh1 d1wioa2  
d4i0cc1 d1cicb1 d1lmka2 d1lmka1 d1iqwh1 d1orqb1 d1ejoh1 d1jnlh1  
d4zga1\_ d43c9b\_ d1ggbl1 d1wejh1 d3q6fa1 d1f3dj1 d3c6la1 d1bqlh1  
d3p9wb\_ d1a3r11 d1h0db1 d2uzil\_ d1eo811 d1qfwl\_ d1n7ml1 d1igja1  
d1c5ch1 d2a9mh\_ d1rmfh1 d1fj1b1 d4heme\_ d1ccza1 d1a5fh1 d1ogad1  
d1dlfh\_ d1qa9b\_ d1vgel1 d3qskb\_ d1sjxa\_ d4ozfg1 d1sq2n\_ d1qd0a\_  
d1kcvh1 d1c5db1 d3qcull d8faba1 d3bn9d1 d1mjuh1 d4y8dc\_ d7fabh1  
d3dvgb1 d1lo011 d1a6tb1 d1gigh1 d1kcrh1 d2hwz11 d1yjdc1 d3clfl1  
d4krna\_ d1dl7l\_ d1e6o11 d1mexh1 d3r0ma\_ d4kkna\_ d1fns11 d1loaqh\_  
d1rzia1 d1lucb1 d1ncw11 d4b41a\_ d1nfd1 d2mpah1 d2d7t11 d4grwf\_  
d4b5ea\_ d11k3h1 d3u79a\_ d4u3xa\_ d1ghf11 d1bvkb\_ d1mcww1 d1b88a\_  
d1jrhh1 d32c2b1 d4wemb\_ d1dsfh\_ d1op3h1 d1ce111 d1iqda1 d1qoka1  
d1qoka2 d1qfuh1 d2crya1 d1ay1h1 d1loaq1\_ d3ab0b\_ d1rurl1 d1t4kb1  
d1bz7b1 d1n0xh1 d1for11 d1lucb1 d4w6yb\_ d43c9a\_ d2aabl1 d1tzia1  
d4n1ca\_ d1k6qh1 d3g9ab\_ d4tvsa1 d1igmh\_ d1pz5b1 d3dx9a1 d3wxwh\_  
d1nakh1 d1kcul1 d3eaka\_ d4qlra1 d1cr911 d1d9ka\_ d1f4x11 d1deea1  
d2i27n2 d1c12a1 d2orb11 d1j8hd1 d1mcp1 d1c5da1 d1kenh1 d1bd2e1  
d1h5ba\_ d4x7fc1 d3upaa\_ d1t3fa1 d1indh1 d2dtgc1 d4hc111 d1zv5a1  
d4wgvb\_ d1uwgl1 d4f37k1 d1aqkh1 d1vesa\_ d3zkqd\_ d1fpt11 d1lo411  
d1knob1 d3rrqa\_ d1ct8b1 d4orz\_ d1mlbb1 d4hgkc1 d1dgd11 d1bogb1  
d4ozhe1 d1dr9a1 d1i7za1 d1dn0b1 d1kell1 d1rzib1 d1ypz11 d1wtla\_  
d1hkfa\_ d1fail1 d1figh1 d2vyre\_ d1sjva\_ d1ohqa\_ d1bfoa1 d1pkqb1  
d1mjul1 d1b4j11 d1nsn11 d2arjb1 d1p4bh\_ d4aj0a\_ d3nn8b\_ d2rcja1  
d1f2xk\_ d4v1dd\_ d1adqh1 d2eksa\_ d4k3ga\_ d1jfqh1 d1uweh1 d1frgh1  
d4gftb\_ d1uz8b1 d4n1ea\_ d1bm311 d1clo11 d3mcka1 d2vq1a1 d1ae6h1  
d4aq1b1 d1uj3b1 d1nbqa1 d1fh511 d2ck011 d2ywza\_ d1q7211 d4nbxb\_  
d1hila1 d4hz1b1 d2j8811 d1zmya1 d1cd0a\_ d1a4ka1 d1psk11 d1a0qh1  
d4krmb\_ d1ncb1 d2fbjh1 d1j8he1 d1i3ua\_ d1cf811 d1fe8h1 d2p1ya1  
d1eeqa\_ d2x89a\_ d1o10a\_ d2r0lh1 d1ub5a1 d1dfbh1 d3eyvb1 d4jdvb1  
d4p2cg\_ d2gsia1 d2agj11 d1u3ha1 d2h1ph1 d1rih11 d1fskc1 d1boga1  
d2a7711 d1ospl1 d1qfoa\_ d3dwta\_ d2fx711 d1rz711 d3stba1 d1pkqa1  
d1b6da1 d1dzba2 d1dzba1 d1kj2a\_ d411ha\_ d1rzgb1 d1dqlh\_ d12e811  
d1mie11 d1jmaa\_ d1sbs11 d1fgnh1 d1f5811 d1mqkh\_ d1ndgb1 d3qeg11  
d1ia11 d2aw2a1 d1tqbc1 d3fo2a1 d4dkaa\_ d1f8th1 d2g6011 d2ywya\_  
d1uj3a1 d1yc7a\_ d3bd3a\_ d4w6xb1 d1nmb1\_ d1i8ka\_ d1rjlb1 d1ypze1  
d1p7kb1 d1kxqe\_ d1gpoh1 d2z4qa1 d1w72h1 d1i9r11 d4qgya1 d4xt1c\_  
d2qqnh1 d1cica1 d3c08h1 d2cd0a\_ d2bdnh1 d1hnga1 d1mam11 d1nldh1  
d1cr9h1 d4lcih1 d3bkyh1 d3qg711 d1ai111 d1kxvc\_ d4iosd\_ d1l7ih1  
d2x1qa\_ d1ub6b1 d3k74b\_ d1libgh1 d1teth1 d1igya1 d1hxma1 d2x6ma\_  
d2e71a\_ d5e03a\_ d1qfwm\_ d2r0kh1 d1igjb1 d1rurh1 d1plgh1 d1mj8h1

d1yuhb1 d3fmg11 d1rzf11 d1emt11 d1ad9b1 d1igtb1 d1nlb11 d1d5ih1  
d3k7ua\_ d4ffyh\_ d1bwwa\_ d3dvga1 d1a6ta1 d1fgvl\_ d4qxgl1 d1mim11  
d1jhl1\_ d2hffb1 d2hh011 d1qkzh1 d1l7t11 d1afvh1 d1iaii1 d2cjuh\_  
d1um5h1 d2ghwb2 d2ghwb1 d1kgce1 d2fgwh1 d1ikfh1 d1dvfd\_ d2i24n1  
d2xtjb\_ d1za3b1 d2yc1a\_ d2hh0h1 d2x1oa\_ d1bvka\_ d1rjla1 d5e7ba1  
d1igta1 d1il1b1 d2fb411 d1mvua\_ d1jpt11 d32c2a1 d1fvca\_ d1iqdb1  
d2hrph1 d2p4ab\_ d4qo1a\_ d1p2cb1 d1wt5c\_ d1t4ka1 d5c1mb\_ d1it911  
d1bz7a1 d1b2wh1 d1e4wl1 d1jnl11 d1yedb1 d1za6b1 d3u7aa\_ d1igfh1  
d3gnm11 d1orsa1 d1wejl1 d1a2ya\_ d1hxmb1 d1gafh1 d2j4wh1 d1pz5a1  
d1j05a\_ d1a3rh1 d4fq111 d1qfwh\_ d1eo8h1 d1n7mh1 d4s11a\_ d1kegh1  
d5da4a\_ d1iqwl1 d3whxb1 d1vgeh1 d1deeb1 d1c12b1 d1t2ql1 d1ad9a1  
d3gsnb1 d3b2uc1 d1ggbh1 d1t3fb1 d1nak11 d4ocmc\_ d1lila1 d2v7hb3  
d2esve1 d1mcoh1 d2qr0b1 d2q3aa\_ d1ct8a1 d1kcrl1 d2pxyb\_ d2uzih\_  
d5c3ld\_ d3durb\_ d1c5cl1 d2ak4e1 d1d17h\_ d1xiwd\_ d1mlba1 d1rmfl1  
d1i7zb1 d1dlfl\_ d2xa3a\_ d5bq7b1 d1dqqb1 d3h4211 d1egjh1 d1kcv11  
d1fe811 d2j6e11 d1f3rb2 d1lk311 d1sm3h1 d1q0xh1 d1ghfh1 d7fab11  
d1igch1 d1lo0h1 d4idla\_ d5c2b1\_ d1jrh11 d1il1a1 d3zhda1 d4kfzc\_  
d1b0wa\_ d1e6oh1 d1mex11 d4krpb\_ d1fnsh1 d1ncwh1 d4hgma\_ d4eigb1  
d4rzca\_ d2mpa11 d4y5xa\_ d5en2b1 d3lrga1 d4ej1c1 d1rhha1 d1j05b\_  
d1forh1 d1q9wb1 d2wzpd\_ d2aq2a1 d1h0da1 d3revb1 d2ij0c1 d1tzha1  
d4m7j11 d1k6q11 d3b9kc1 d1igml\_ d3qeau1 d1dsfl\_ d1celh1 d1kcu11  
d1zvha1 d1zvoa1 d1tqbb1 d1ay111 d2qsc11 d2cgrh1 d1nl0h1 d1ken11  
d3eo0a1 d4n9ob1 d1n0x11 d3k1kc\_ d2aq2b1 d1ck1a1 d1enfa1 d1i4pa1  
d1v1oa1 d1et9a1 d1esfa1 d2g9hd1 d4ohja1 d1klud1 d1bxta1 d1eu3a1  
d1ty0a1 d1fnua1 d2qaln1 d2cqva1 d1fhga\_ d2klma\_ d2dl2a1 d1biha3  
d1biha1 d1biha4 d3qp3a1 d1g1ca\_ d1gxea\_ d1cvsc2 d1cvsc1 d1xmwa2  
d1m4ka2 d2otpa2 d1biha2 d1rhfa2 d2fcba2 d2fcba1 d1wwbx\_ d1gsma2  
d1lepfa1 d1lepfa2 d2dava1 d1waaa\_ d1f97a2 d1x44a1 d1vcaa2 d1fnla2  
d1fnla1 d3b5ha2 d3h8na2 d3h8na1 d1jbja1 d1jbja2 d1pd6a\_ d1f2qa2  
d1f2qa1 d3cx2a\_ d1nbqa2 d3b5ha1 d1n26a1 d1xiwb\_ d1xaua\_ d1fltx\_  
d2ifga1 d1olla1 d1olla2 d1cs6a4 d1cs6a3 d1cs6a2 d1cs6a1 d2gw5a2  
d1sy6a1 d1xiwa\_ d1ucta2 d1ucta1 d1ry7b2 d1gl4b\_ d1qz1a3 d1olza1  
d2c9aa1 d1wwca\_

**Family-70 (c.47.1.10)**

**Positive dataset contains 33 protein sequences.**

d1xvqa1 d3hy2a\_ d2cvba1 d1we0a1 d2bmxa1 d2a4va1 d1xiya1 d1zofa1  
d2ggta\_ d3tjja\_ d4jela1 d3s9fa\_ d2zcta\_ d2b1ka\_ d5dvba1 d2b5xa1  
d2v2ga\_ d3tb2a\_ d4llra\_ d4fh8a1 d2h30a\_ d2z9sa\_ d2f8aa1 d1tp9a1  
d2b7ka\_ d3hvva\_ d2wfca1 d4kcea\_ d1xvwa1 d4gqca1 d3qpma\_ d4k1fa\_  
d1zzoa1

**Negative dataset contains 3974 protein sequences.**

d1xfda2 d1m32a\_ d1libja\_ d1c7na\_ d1iuga\_ d4q75a\_ d2bkwa1 d1t3ia\_  
d1n8pa\_ d1qz9a\_ d1jf9a\_ d1eg5a\_ d1p3wa\_ d3kgwa\_ d2ctza1 d1vjoa\_  
d2rfva\_ d1gc0a\_ d1cs1a\_ d1d2fa\_ d2ch1a1 d1qgna\_ d1pffa\_ d1elua\_

d1u08a\_ d1lc5a\_ d1b5pa\_ d2ay1a\_ d1bw0a\_ d3pd6a\_ d2csta\_ d1j32a\_  
d1fg7a\_ d4wlha\_ d1o4sa\_ d1v2da\_ d1gdea\_ d1m6sa\_ d1v72a1 d1svva\_  
d1ajsa\_ d1wsta1 d2f8ja2 d1lk9a\_ d1vp4a1 d1xi9a1 d2gb3a1 d1yaaa\_  
d3i2ka1 d1lnsa3 d1mpxa2 d1xkta1 d2hfk\_a\_ d1jmkc\_ d5d3ka\_ d2cfba1  
d1dfoa\_ d1o69a\_ d1bj4a\_ d3k28a\_ d2bwpa\_ d3lg0a\_ d2fnua\_ d3ou5a\_  
d1z7da1 d1b9ha\_ d1iaya\_ d4msoa\_ d1bs0a\_ d1s0aa\_ d1sffa\_ d3tqxa\_  
d1mdoa\_ d3qboa\_ d3pgya\_ d2dkja\_ d1ejia\_ d1vefa1 d4wxga\_ d3bs8a\_  
d3gbxa1 d1w23a\_ d2b5aa1 d2ofya1 d4mcxa\_ d2xi8a\_ d2icta\_ d2bnma1  
d2ppxa1 d1y7ya1 d1sefa\_ d1sfna\_ d1sq4a\_ d1i26a\_ d1e57b\_ d1auyb\_  
d1fwxa1 d1libya\_ d1f56a\_ d1bypa\_ d1azca\_ d1ws8a\_ d3u25a\_ d1cuoa\_  
d1id2a\_ d1rkra\_ d2iaac\_ d4dp1x\_ d1nwpa\_ d2gima\_ d2i7sa\_ d1qhqa\_  
d1gyca3 d1hfua2 d1kbva1 d1kbva2 d1sdda1 d1sdda2 d1gyca1 d1gyca2  
d1mzya1 d2bw4a1 d1aoza1 d1aoza3 d1aoza2 d1kyaa2 d1kyaa3 d1kyaa1  
d1mzya2 d4e9sa1 d1sddb1 d1sddb2 d1hfua1 d1hfua3 d1oe1a1 d1v10a2  
d1v10a3 d1v10a1 d1rypd\_ d1irua\_ d1rypc\_ d3unfk\_ d1rypa\_ d1j2pa\_  
d1irui\_ d1j2qh\_ d3unfh\_ d1m4ya\_ d1rypb\_ d1irul\_ d1irug\_ d1iru2\_  
d1q5rh\_ d1rypg\_ d1g3ka\_ d1iruf\_ d1q5qa\_ d1e94a\_ d1irub\_ d1ryph\_  
d3ty6a\_ d1iruj\_ d1iruk\_ d1rype\_ d1irud\_ d1irue\_ d3mi01\_ d1rypf\_  
d1iruh\_ d2z3ba\_ d1iruc\_ d3mka2\_ d1irul\_ g1or0.1 g1cp9.1 g1e3a.1  
d1a3qa1 d1iknc\_ d3brda1 d1p7h11 d1oy3c\_ d1imhc1 d1zk9a1 d2cxka1  
d2bema\_ d1pama1 d1ea9c1 d1qhoa1 d2fhfa2 d2fhfa1 d1k3ia1 d1j0ha1  
d1cxlal d2bhua1 d1edqa1 d1f1sa2 d1ut9a2 d1gvial d1txka1 d1zx5a1  
d1qwra\_ d1jgta2 d1ofda3 d1ea0a3 d1ecfa2 d1q15a2 d1ct9a2 d1te5a\_  
d1ep0a\_ d2pa7a1 d1wlta1 d2c0za1 d1ktja\_ d1ds6b\_ d1fstb\_ d1ex0a1  
d1g0da1 d3u1ra1 d1g9ka2 d1kapp2 d4w9ta\_ d1jvna1 d4x2ra1 d1ka9f\_  
d1qo2a\_ d4axka1 d1thfd\_ d4u28a\_ d2y88a\_ d4wd0a\_ d1vzwa1 d2bjca1  
d2hsga1 d1qpza1 d1efaa1 d1ydwa2 d2nvwa2 d1zh8a2 d1qkia2 d1xeaa2  
d1tlta2 d1r0ka3 d1j5pa3 d1vkoa2 d1vm6a2 d3qvsa2 d1gr0a2 d1p1ja2  
d2ovga\_ d1sq8a\_ d1rzsa\_ d3kz3a\_ d3orca\_ d3gpdg2 d2q49a2 d1hdgo2  
d2g17a2 d2cvoa2 d2czca1 d3pwka2 d1obfo2 d1i32a2 d1zyao2 d2pkqo2  
d1b7go2 d2hjsa2 d1cf2o2 d1vkna2 d1nvmb2 d4lt9a1 d3tc7a1 d3hoja\_  
d1i4na\_ d3vnda\_ d3n18a1 d1geqa\_ d3naval d1v5xa\_ d4a2ra1 d3tc6a1  
d1ujpa\_ d4ijba\_ d1xcfa\_ d1rd5a\_ d1qopa\_ d3b5va\_ d2msya\_ d2djoa1  
d2r5za\_ d1au7a1 d1f43a\_ d2lmda1 d1akhb\_ d1s7ea1 d3nara\_ d1zq3p1  
d2craa1 d1mija\_ d4uuta\_ d3a01a\_ d1x58a1 d3rkqa1 d3cmya1 d2cqxa1  
d2da6a1 d1e3oc1 d1fjla\_ d1mh3a1 d1ig7a\_ d1x41a1 d1wh7a1 d1gt0c1  
d2mw8a\_ d1lfup\_ d1x2ma1 d1b72a\_ d1wi3a1 d1wjha1 d1x2na1 d1mnmc\_  
d2cuea1 d3k2aa\_ d2hosa\_ d2jwta2 d1pufa\_ d1oact1 d2hi3a\_ d1b8ia\_  
d4j19a\_ d3lnqa\_ d1wh5a1 d1b8ib\_ d1fexa\_ d2cqra1 d1guua\_ d1ug2a1  
d2cqqa1 d2ajea1 d4a69c\_ d2crga1 d2iw5b1 d1xc5a1 d1ofcx1 d2cu7a1  
d1wgxa1 d2cjja1 d2ckxa1 d1gvda\_ d1hcra\_ d1tc3c\_ d1gdta1 d1u78a2  
d1xg1a1 d1itya\_ d2iu5a1 d1zk8a1 d2g7sa1 d2fd5a1 d2np5a1 d1z0xa1  
d2id6a1 d2d6ya1 d2i10a1 d2oi8a1 d3c07a1 d2ns7a1 d2fq4a1 d2yvea1  
d1t33a1 d2o7ta1 d1rkta1 d2np3b1 d2g7ga1 d2gena1 d2fbqa1 d2g7la1

d2gfna1 d2g3ba1 d2jj7a1 d2hyja1 dlsgma1 dlui5a1 d2hkua1 d2id3a1  
d4jyka1 d3lv8a\_ d1s3ga1 d1zakal d1s4qa\_ d3tvta2 dluf9a\_ dlkhta\_  
d1ckea\_ d1osna\_ d1p5zb\_ d4tmka\_ d3cm0a\_ d1tmka\_ d1jaga\_ d3h86a\_  
d1t0hb\_ d1nn5a\_ d2h92a\_ d3kb2a1 d2c95a1 d1yj5a2 d1ly1a\_ d2ak3a1  
d1vyva2 d1deka\_ d2grja1 d1p3ja1 d1y63a\_ d1e4ya1 d1s96a\_ d3iija1  
d1lvga\_ d1nksa\_ d1vyua2 d4e22a\_ d1qf9a\_ d1jjva\_ d1q3ta\_ d1ki9a\_  
d1lw7a2 d1teva\_ d1kjwa2 d1gsia\_ d1m7ga\_ d1x6va3 d1g3ma\_ d1j99a\_  
d1t8ta1 d1nsta\_ d1zrha\_ d1ls6a\_ d2a3ra\_ d1aqua\_ d2zptx\_ d3ckla\_  
d1texas\_ d1q44a\_ d2gwha\_ d1uj2a\_ d4gi7a\_ d2jeoa1 d1rz3a\_ d1z0ja1  
d3umra2 d3gj0a1 d2gaoa1 d1yzga1 d1x3sa1 d1g7sa4 d1puja\_ d1udxa2  
d1kk1a3 d2o52a\_ d1jwyb\_ d1zcaa2 d1zcba2 d2fv8a1 d2cjwa\_ d3dz8a1  
d1xzpa2 d1vg8a\_ d4qxaa\_ d2ew1a1 d1x1ra1 d2bcgy\_ d3doea1 d3cona\_  
d3rega\_ d3wyga\_ d1upta\_ d2b6ha1 d1zd9a1 d1lnza2 d1r5ba3 d1n0ua2  
d1r2qa\_ d2f91a1 d2rhda\_ d3q3jb\_ d3q85a\_ d1efma1 d1r8qa\_ d2gf9a1  
d2akab1 d1ek0a\_ d1z08a1 d2gcoa1 d2dy1a2 d4g01b\_ d2cxa1 d1svia\_  
d3q72a\_ d1ni3a1 d4ac9a4 d2erxa1 d2bmea\_ d1wxqa1 d2gf0a1 d4ldja1  
d1zunb3 d1d5ca\_ d4lv5b\_ d1efca3 d1kmqa\_ d2g6ba1 d3lrpa\_ d1tada2  
d2y8ea\_ d4rd4a1 d1z06a1 d2heia\_ d3a58b\_ d1u0la2 d1d2ea3 d1zj6a1  
d2ocba\_ d3rwoa\_ d1mr3f\_ d2e9sa1 d4u5xa1 d2iwra\_ d2fn4a1 d3bwdd\_  
d2nzja1 d2atva1 d2ksqa\_ d3l43a\_ d1mkya2 d1mkya1 d1wmsa\_ d1jnja3  
d2rmka\_ d1f6ba\_ d1f60a3 d1gota2 d1jala1 d2fh5b1 d1g16a\_ d2wblc\_  
d1m7ba\_ d1wf3a1 d1f5na2 d1t9ha2 d1z6xa1 d1z0aa1 d2fg5a1 d2a5ja1  
d2bcjq2 d1s0ua3 d1ky3a\_ d4y0va\_ d4lhwa\_ d2qmea1 d2atxa1 d1legaa1  
d1ryha\_ d1moza\_ d1nrjb\_ d2erya1 d3bfka\_ d1puia\_ d1fzqa\_ d3j3az1  
d3t5ga\_ d1shza2 d3defa\_ d2f7sa1 d3raba\_ d3tsoa\_ d3aq4a\_ d2a17a1  
d3sfva1 d3bc1a\_ d1sdma\_ d3h4sa1 d2heha\_ d2grya\_ g3kin.1 d1kk8a2  
d1br2a2 d1goja\_ d1f9va\_ d2mysa2 d1lkxa\_ d3t0qa\_ d4db1a1 d3gbja\_  
d1ry6a\_ d1v8ka\_ d2h0ba\_ d2erfa\_ d1h30a1 d3mw4a1 d1pz7a\_ d2r1ba\_  
d3v64a1 d1d2sa\_ d3bopa1 d3mw3a1 d1okqa1 d1okqa2 d1k8ka2 d1k8ka1  
d3uleb1 d3i33a2 d3i33a1 d1bupa1 d1dkgd2 d1dkgd1 d4ci6a2 d1jcfal  
d4a2ba2 d2fxua1 d1yaga2 d4cbua2 d1bupa2 d1g99a1 d2e1za2 d2e1za1  
d1saza1 d1saza2 d1iqca1 d1eb7a2 d1eb7a1 d1nmla2 d1nmla1 d3h3no1  
d3h3no2 d3ezwa2 d2d0oa3 d2d0oa2 d1nbwa2 d1hroa\_ d4gedb\_ d3zooa\_  
d1mz4a\_ d1gu2a\_ d1f1fa\_ d1dvva\_ d1c6ra\_ d1c75a\_ d1e29a\_ d1gdva\_  
d1cnoa\_ d1h32b\_ d1co6a\_ d2bh4x\_ d2aiua\_ d5cytr\_ d1jdlal d1i8oa\_  
d2zboa\_ d3dmia\_ d1ls9a\_ d1wvec\_ d2yk3a\_ d3ph2b\_ d1dw0a\_ d5aura\_  
d1q13a\_ d1qn2a\_ d1f1ca\_ d4zzva\_ d2xspa\_ d1eg1a\_ d4v20a\_ d1ojja\_  
d4ipma1 d1gpia\_ d4csia\_ d3pfza\_ d2yoka\_ d2nqya\_ d1h4ga\_ d1hixa\_  
d1oa2a\_ d1olra\_ d3b7ma\_ d4h7ma1 d3wp3a\_ d2vgda\_ d1igoa\_ d3zsea\_  
d2nlra\_ d3wx5a\_ d1oa3a\_ d1pvxa\_ d1m4wa\_ d1f5ja\_ d1oa4a\_ d1ks5a\_  
d4ixla1 d2a6za1 d3a4ua\_ d2a6va1 d2ah2a1 d1h6ua2 d1g66a\_ d5ajha1  
d1evsa\_ d1cnt1\_ d1pvhb\_ d1z7ca\_ d1huwa\_ d1bgea\_ d1rhga\_ d1f6fa\_  
d1f45b\_ d1i1rb\_ d1axia\_ d1etea\_ d3tgxb\_ d1scfa\_ d2z3qa1 d3qb1a\_  
d1hula\_ d4nkqb\_ d1eera\_ d1v7mv\_ d5e4ea\_ d2o27a\_ d3b5ka\_ d2psma1

d4zf7a\_ d3uf5a\_ d4x51a\_ d1d9ca\_ d4ypgc1 d3oq3a\_ d1lqsl\_ d1n1fa\_  
d1aula\_ d1wu3i\_ d3besl\_ d3ux9a\_ d4dnxa2 d1m8pa2 d1v47a2 d1g8fa2  
d1x6va2 d3rbaa\_ d2qtra\_ d1nupa\_ d3l92a\_ d1f9aa\_ d1qjca\_ d2h29a\_  
d1vlha\_ d1od6a\_ d1lw7a1 d1mrza2 d4ruka\_ d2el7a\_ d1iq0a2 d1irxa2  
d1r6ta2 d1ivsa4 d2cyba\_ d1rqga2 d1j09a2 d2yxna\_ d1f7ua2 d1h3fa1  
d1ffya3 d2g36a1 d1nzja\_ d1n3la\_ d1i6la\_ d1pfva2 d1h3na3 d3n9ia\_  
d3sz3a1 d3sw2a\_ d1moxc\_ d1dx5i3 d1edmb\_ d1autl2 d1autl1 d1nqlb\_  
d1dva11 d1szba2 d1kigl\_ d2y5f1\_ d1gk5a\_ d1g1sa2 d1nt0a3 d1xdtr\_  
d1lmja2 d1lmja1 d1nzia2 d2wphe\_ d1klil\_ d1pfxl2 d1pfxl1 d1p9ja\_  
d1g1ta2 d1f7ea\_ d4yzub\_ d1nuba2 d2mgpa1 d1b9wa1 d1b9wa2 d2mgpa2  
d1obl2 d1n1ia2 d1n1ia1 d2npra2 d2npra1 d1m1xb5 d2y5ia\_ d1qlsa\_  
d1psra\_ d3n22a\_ d2egda\_ d4ggfc\_ d2wcea\_ d2luca\_ d4aqia\_ d3nsia\_  
d2lp3a\_ d1j55a\_ d1a4pa\_ d1k8ua\_ d1nsha\_ d1exra\_ d1tiza1 d1nyaa\_  
d1g8ia\_ d1ggwa\_ d1wdcc\_ d3fwba\_ d1ggza\_ d2o5ga\_ d1ctaa\_ d1m45a\_  
d3i5gc\_ d1s18a\_ d1fpwa\_ d2scpa\_ d2roaa\_ d4aqra\_ d3pn7b\_ d1br1b\_  
d2mysb\_ d1s6ca\_ d1bjfa\_ d2obha\_ d1jfka\_ d1jf0a\_ d1qv0a\_ d1lkja\_  
d2mlfc\_ d2m97a\_ d2d8na\_ d4by5a\_ d1jbaa\_ d4nqga\_ d1wdcb\_ d2mysc\_  
d1j7qa\_ d1s6ia\_ d1uhka2 d1r2ua\_ d1dtla\_ d3kf9a\_ d3pn7c\_ d5d67d\_  
d1tuza\_ d1eg3a1 d1eg3a2 d2zkmx1 d1snla\_ d1gjya\_ d1y1xa\_ d1hqva\_  
d1dvia\_ d1df0a1 d4usla\_ d1k94a\_ d1sfsa\_ d1wkya2 d1luuqa\_ d3wh9a\_  
d4mlra\_ d1xyza\_ d4xuya\_ d2je8a5 d4bf7a1 d3cuia\_ d1ur4a\_ d1qw9a2  
d1odza\_ d2vzsa5 d1bqca\_ d2x2ya1 d1hjqa\_ d1qnra\_ d4y7ea1 d1vjza\_  
d4k68a\_ d2v3ga\_ d4hpga\_ d1nofa2 d1nq6a\_ d1h4pa\_ d1aq0a\_ d3ziza\_  
d4bs0a\_ d1ecea\_ d1h1na\_ d1ta3b\_ d1w91a2 d1ilwa\_ d1uhva2 d1us3a2  
d1egza\_ d7a3ha\_ d1tvna1 d3nyda1 d1ghsa\_ d2cyga1 d4xv0a\_ d2c8na2  
d1w32a\_ d3emca\_ d1v6ya1 d1foba\_ d2uwfa1 d2fgla\_ d3niya1 d2c0ha1  
d1rh9a1 d1yq2a5 d1szna2 d1fa2a\_ d1pama4 d5do8a1 d1ea9c3 d2fhfa5  
d1qhoa4 d1avaa2 d1m53a2 d4m8ua1 d2gjpa2 d1lwaha2 d4howa1 d1ktba2  
d1j0ha3 d3vm5a1 d2x1ia\_ d1wzaa2 d1uasa2 d2diea1 d1mxga2 d1ht6a2  
d1eswa\_ d1iv8a2 d5cpsa\_ d1ud2a2 d1zjaa1 d3gbea1 d1kwga2 d1wdpa\_  
d1gcya2 d1g5aa2 d1hvxa2 d3dhpa2 d2bhua3 d4do4a1 d3qgva1 d1e43a2  
d1g94a2 d2d3na2 d1gjwa2 d1gvia3 d1x1na1 d1r7aa2 d1tz7a1 d4toqa\_  
d1wb0a1 d1w9pa1 d1eoka\_ d1litxa1 d1kfwa1 d1goia2 d1ledqa2 d2gsja\_  
d1hjxa1 d1jnda1 d1vf8a1 d1etob\_ d1lumqa\_ d1g2ha\_ d1mixa2 d1e5wa2  
d1j19a2 d1isna2 d2a16b2 d3syxa1 d1mkea1 d2p8va\_ d1xoda1 d1i7aa\_  
d1evha\_ d1qc6a\_ d2hmta\_ d1lssa\_ d1b9ra\_ d1offa\_ d1frra\_ d3wcqa\_  
d1e9ma\_ d1l5pa\_ d1wria\_ d1i7ha\_ d3av8a\_ d1czpa\_ d1rfka\_ d3p1ma1  
d3b2ga\_ d2bt6a2 d1wgqa1 d1v89a1 d2coda1 d1zc3b\_ d1wg7a1 d1u5ea1  
d1v61a1 d2coca1 d2ys1a1 d1v5pa1 d1nty2 d1wjma1 d1wila1 d1u29a\_  
d1xx0a1 d1unqa\_ d2zkmx3 d1fhoa\_ d1v88a1 d2adza1 d1x1fa1 d1p6sa\_  
d2coaa1 d1v5ma1 d1faoa\_ d2x18a\_ d1dyna\_ d1x1ga1 d4kaxb\_ d2j59m1  
d1ki1b2 d1xcga2 d1txda2 d1u5da1 d1dbha2 d1wlha\_ d1upqa\_ d1v5ua1  
d1foea2 d2fj1a1 d1eaza\_ d2dfka2 d2cofa1 d1kz7a2 d91dta1 d2ewda3  
d1up7a1 d2dfda1 d1s6ya1 d1vjta1 d7mdha1 d1hyea1 d1t2da1 d1ojsa3



d1ldna1 d1hyha1 d1civa1 d2a92a1 d1ez4a1 d1i0za1 d1y6ja1 d1gv0a1  
d1ur5a1 d1lllda1 d1lobba1 d1v8ba1 d1gdha1 d1l7da1 d1mx3a1 d1ygya1  
d1qp8a1 d1li4a1 d1j4aa1 d2naca1 d1npya1 d3t4ea2 d1o0sa1 d2hk9a2  
d2egga2 d1b26a1 d1bvua1 d1gq2a1 d1c1da1 d1leha1 d1gtma1 d1euza1  
d1nvt1a1 d3dona2 d1edza1 d1gpja2 d1vi2a1 d1p77a1 d1nyta1 d1b0aa1  
d1vl6a1 d1v9la1 d1txga2 d3f47a1 d2pv7a2 d1xc2a3 d2ahra2 d4xiya1  
d2f1ka2 d1pgja2 d1i36a2 d1np3a2 d1lj8a4 d1teaa3 d1qmg2a2 d2i76a2  
d2g5ca2 d1wdka3 d1dlja2 d3cuma3 d1kola2 d1f8fa2 d1qora2 d1jqba2  
d1vj0a2 d1cdoa2 d1gu7a2 d1d1ta2 d1xa0a2 d2dm6a2 d1jvba2 d1rjwa2  
d1h2ba2 d1tt7a2 d1piwa2 d1o89a2 d1iz0a2 d1e3ja2 d1yb5a2 d1uufa2  
d1vj1a2 d1e3ia2 d3gpdg1 d1vc2a1 d2nvw1 d1u8fo1 d1ydw1 d1hdgo1  
d2g17a1 d1cf2o1 d2czca2 d1r0ka2 d1obfo1 d2cvoa1 d1ebfa1 d1h6da1  
d1zh8a1 d2q49a1 d1qkia1 d1j5pa4 d3pzra1 d1xeea1 d1vkoa1 d1vm6a3  
d3qvsa1 d2pkqo1 d1b7go1 d1gr0a1 d1p1ja1 d1lc0a1 d1j0xo1 d3pwka1  
d2hjsa1 d1zyao1 d1vkna1 d1tlta1 d1nvm1 d3sjua\_ d3ojfa1 d1xu9a1  
d2jjya1 d1n7ha\_ d1y1pa1 d1h5qa\_ d1jtva\_ d4fs3a\_ d2bkaa1 d1gy8a\_  
d2c5aa1 d1ulsa\_ d1ooea\_ d2b69a1 d1y5ma1 d1spxa\_ d1aela\_ d1bxka\_  
d1ydea1 d1gega\_ d1hdoa\_ d1o5ia\_ d1e6ua\_ d1snya1 d2rhca\_ d3zv4a\_  
d5ceja\_ d2d1ya1 d1fjha\_ d3w8ea\_ d2fmua1 d1x1ta\_ d1rpna\_ d3ay7a1  
d1k2wa\_ d1eq2a\_ d2hrba1 d3ruaa\_ d2ew8a1 d4hwka\_ d1xgka\_ d2bd0a1  
d1yo6a1 d2a35a1 d2ntva\_ d1vl8a\_ d1hdca\_ d4bkua\_ d2ag5a1 d2q45a\_  
d1nffa\_ d4iy1a\_ d1zbqa1 d1kewa\_ d1ek6a\_ d1ja9a\_ d2q46a2 d1iy8a\_  
d1cyda\_ d2ptga\_ d1hxha\_ d1uzma1 d3lyla\_ d4m89a\_ d3wyea\_ d2b1la1  
d1w6ua\_ d1sb8a\_ d2q2va\_ d4nr0a\_ d1e6wa\_ d2gasa\_ d3oiga1 d2bgka1  
d1mxha\_ d1vl0a1 d1rkxa\_ d1r6da\_ d1wmaa1 d1e7wa\_ d2c07a1 d1xkqa\_  
d3tzha\_ d1g0oa\_ d3lz6a\_ d1qyca\_ d1ledoa\_ d1gz6a\_ d1loc2a\_ d1t2aa\_  
d1zema1 d2xoxa\_ d1z45a2 d1geea\_ d1p33a\_ d3lt0a\_ d4e6pa\_ d2wyua\_  
d1db3a\_ d4q9na\_ d1xhla\_ d4o1ma\_ d1fmca\_ d2uvda\_ d2gdza1 d1uaya\_  
d2z1ma\_ d2o23a2 d2fr1a2 d2fr1a1 d1qsga\_ d1qyda\_ d4zjua\_ d2a4ka1  
d1yb1a\_ d1wvga1 d1yxma1 d3f4ba\_ d1mg5a\_ d1xg5a1 d1r55a1 d3gboa\_  
d1atla\_ d1kufa\_ d1buda\_ d4q1la\_ d1ypl1a\_ d1wnia\_ d3nqyb\_ d4gera\_  
d4c5pa\_ d2bsza1 d4bgfa\_ d1w4ta1 d1mdwa\_ d1qxp4 d1ziva1 d1zcma1  
d3ioqa\_ d1fh0a\_ d1o0ea\_ d1khqa\_ d1m6da\_ d2cb5a\_ d1cs8a\_ g8pch.1  
d1s4va\_ d2pnsa\_ d1vsna1 d1mira\_ d1iwda\_ d2oula\_ d7pcka\_ d3bwka\_  
d3bcna\_ d2p86a\_ d1pvja\_ d1gece\_ d1deua\_ d4bs6a\_ d1xkga1 d1cqda\_  
d1jqpa2 d2c0ya\_ d2bdza\_ d3p5ua\_ d2jk6a2 d2jk6a1 d1feca1 d1feca2  
d1lpfa1 d1lpfa2 d1xhca1 d1xhca2 d1dxla2 d1dxla1 d1gera2 d1m6ia2  
d1onfa1 d3lada2 d3lada1 d1w4xa1 d1w4xa2 d1gesa2 d1mo9a1 d1xdia1  
d1fl2a2 d1fl2a1 d1fcda1 d1fcda2 d1h6va2 d1h6va1 d1mo9a2 d1gv4a2  
d1gv4a1 d2gv8a2 d2gv8a1 d1aoga1 d1aoga2 d1hyua1 d1ebda1 d1ebda2  
d3dk9a1 d1q1ra2 d1q1ra1 d1gesa1 d1zbf1a1 d2z1ha\_ d2etja1 d3qioa1  
d1j11a\_ d2e4la\_ d1j12a\_ d2lsna1 d1uaxa\_ d2yv0x\_ d1mu2a1 d1lekea\_  
d1i39a\_ d1s5ja1 d2hbja2 d2igia\_ d1wlja\_ d1qhta1 d4dlea1 d2f96a1  
d3tr8a1 d3mxma\_ d1q8ia1 d1y97a1 d1w0ha\_ d1kfsa1 d2py5a1 d1noya\_

d1d5aa1 d1yt3a3 d2guia\_ d3mwpal d4kb1a\_ d1xl4a1 d3vsqa\_ d2gixa1  
d1p7ba1 d1liv0a\_ d1js9c\_ d1f15b\_ d1za7a\_ d1laja\_ d1liuka\_ d2csua1  
d3q9ub\_ d2yv1a1 d3q9na\_ d2d59a\_ d1oi7a1 d2yv2a1 d1leuca1 d1y81a1  
d3nvva1 d1krha3 d2h88b1 d1n62a2 d1t3qa2 d1kf6b2 d1zoyb1 d1jq4a\_  
d1ffva2 d1dgja2 d1rm6c2 d1kx5b\_ d3a6na\_ d4m6ba2 d2nqbd\_ d3wkjd\_  
d2yfwe\_ d4h9na\_ d5bnxa\_ d1kx5c\_ d3r45a\_ d1eqzb\_ d4jjnb\_ d1f66c\_  
d1eqza\_ d4wnnb\_ d1kx5a\_ d1u35c1 d1id3a\_ d2nqbc\_ d1kx5d\_ d1ku5a\_  
d1b67a\_ d1tafa\_ d1bh9b\_ d1tafb\_ d1jfib\_ d1q9ca\_ d1h3ob\_ d2byka1  
d1n1ja\_ d4g92b\_ d1jfia\_ d1h3oa\_ d2bykb1 d1n1jb\_ d3zxha\_ d1cgl\_a\_  
d1rm8a\_ d1eaka2 d1hy7a\_ d2jsda\_ d1cxva\_ d1hv5a\_ d1i76a\_ d1lig8a1  
d1czan2 d1czan3 d1czan1 d1lig8a2 d1czan4 d1bg3a4 d1bg3a3 d1bg3a1  
d1qksa1 d1novc\_ d2bbvc\_ d1qqya\_ d1gd6a\_ d1f6ra\_ d1livma\_ d2gv0a\_  
d1iiza\_ d2z2fa\_ d1j8xa\_ d1ghla\_ d1b9oa\_ d1741a\_ d1691a\_ d2o4wa\_  
d1p37a\_ d1k28a3 d1xjta1 d1jtma\_ d2f2qa\_ d4e97a1 d1kw3b2 d1kw3b1  
d4ghga1 d1tfza1 d3isqa1 d3isqa2 d1sqia1 d1sqia2 d1lkda2 d1lkda1  
d1mpya1 d1cjxa2 d1cjxa1 d1sp9b2 d1t47a1 d1t47a2 d1flua2 d1sp8a1  
d1sp8a2 d1flua1 d4iuaa3 d4bvva\_ d5hpga\_ d3k65a\_ d1ki0a3 d1ki0a2  
d1ki0a1 d1a0ha1 d1pmla\_ d3sp8a3 d2feba1 d1qsta\_ d2beia1 d4m3sa\_  
d1u6ma1 d1ygha\_ d1yk3a1 d3dr6a\_ d1xmta\_ d1z4ea1 d2ge3a1 d1bo4a\_  
d2fiaa1 d2jdca1 d1y9wa1 d3to7a\_ d1lwza1 d2fl4a1 d2ozua1 d2b5ga\_  
d2cy2a1 d2p0wa\_ d1cm0a\_ d4pswa\_ d1yrea1 d1yr0a1 d1m4ia\_ d2gana1  
d1yvka1 d1ghea\_ d2g3aa1 d1y7ra1 d2euia1 d1q2ya\_ d2fsra1 d1xeba\_  
d2ae6a1 d1cjwa\_ d1qsma\_ d2aj6a1 d1y9ka1 d1i12a\_ d1vkca\_ d2atra1  
d1n71a\_ d2d4pa1 d2fiwa1 d2fe7a1 d1tiqa1 d2ou2a\_ d1yx0a1 d2fcka1  
d1p0ha\_ d2j8ma\_ d2pq8a\_ d1z4ra1 d1s3za1 d1ufha\_ d4alac\_ d1rera1  
d1s6na\_ d3uzqb\_ d1zsqa1 d1cg2a1 d1yloa2 d1y7ea2 d1y0ya3 d1l1fw1  
d1vixa1 d1fnoa4 d1vhoa2 d1ysja1 d1vhea2 d1z21a1 d2fvga2 d1r3na1  
d2grea2 d1xmba1 g1q7l.1 d1rtqa\_ d1letha2 d1w52x1 d2ppla1 d1hpla2  
d1lpbb2 d2oxea1 d1bu8a2 d1rpla2 d1ys1x\_ d4hs9a\_ d1ispa\_ d1lex9a\_  
d1ku0a\_ d3qmma\_ d2h1ia1 d2r8ba1 d3b5ea1 d3cn9a\_ d1auoa\_ d1lgya\_  
d4l3wa\_ d1llfa\_ d1gz7a\_ d1lukca\_ d1bvsa3 d1ixra2 d3groa\_ d1pjaa\_  
d1thta\_ d2ftba\_ d1pmpa\_ d2rcqa1 d1fdqa\_ d4lkpa\_ d1sa8a\_ d1vyfa\_  
d1lpja\_ d3vg7a1 d4azqa1 d1o8va\_ d5bvqa\_ d2qo4a\_ d1opba\_ d1yiva1  
d1o1va\_ d4bvma1 d4tkba\_ d4i3ba\_ d1bwya\_ d1ftpa\_ d1ggla\_ d4gkca\_  
d1cbia\_ d3p6da1 d1kqwa\_ d2a0aa1 d1xwdc1 d3kj4a\_ d1w8aa\_ d2ifga3  
d1p9ag\_ d1xkua\_ d1eb6a\_ d3p0ya1 d1lgra1 d1lgra2 d1n8yc1 d1m6ba2  
d1m6ba1 d1dzka\_ d4tlja\_ d2a2ua\_ d4wfv\_a\_ d3t1da\_ d4iaxa\_ d3zq3a\_  
d2nnda\_ d1i4ua\_ d1kxoa\_ d1bbpa\_ d1kt7a\_ d1exsa\_ d3s26a1 d1lf7a\_  
d1qfta\_ d4gh7a\_ d1z24a1 d1qabe\_ d1xkia\_ d1ew3a\_ d3bx7a\_ d4iawa1  
d1n0sa\_ d1gkab\_ d3kzaa\_ d2k23a\_ d2l9ca1 d2joza1 d1gm6a\_ d3kffa\_  
d3saoa1 d1e5pa\_ d1yupa1 d1iiua\_ d2tbvc\_ d1c8nc\_ d1x36a\_ d1ng0c\_  
d4sbvc\_ d1lopa\_ d1f2nc\_ d1cixa\_ d1y29a\_ d1v7fa\_ d2jtba\_ d1dlha\_  
d1g9pa\_ d1lupa\_ d1qk7a\_ d1mb6a\_ d2a2va\_ d1niya\_ d1i25a\_ d1hvwa\_  
d2mpqa\_ d1ie6a\_ d1la4a\_ d2mxoa1 d1dl0a\_ d1koza\_ d1qk6a\_ d1emxa\_

d1lqra\_ d1c6wa\_ d1rmka\_ d1ixta\_ d1eyoa\_ d1cnna\_ d1fu3a\_ d1glpa\_  
d1fyga\_ d3lgia\_ d3i77a\_ d2z9ia2\_ d4nsva\_ d1lcya2\_ d4jcna\_ dlagja\_  
d1os8a\_ d1hpga\_ d1p3ca\_ d1l1ja\_ d1qtfa\_ d1ny721\_ d1a6ca3\_ d1a6ca2\_  
d1a6ca1\_ d1pgl22\_ d1pgl21\_ d1pgl11\_ d1ny711\_ d1mqta\_ d1d4m3\_ d1fmd3\_  
d2mev1\_ g1aym.1\_ d1ev13\_ d4q4w1\_ d1r1a3\_ d2x5ia\_ d1rhi1\_ g1r1a.1  
g1d4m.1\_ g1rhi.1\_ d1b35b\_ d1loopa\_ d1tme1\_ d4iv1a\_ g1pvc.1\_ g1fnp.1  
d1fnp1\_ d4gb31\_ d1d4m1\_ d1fmd1\_ d2wzr3\_ g1cov.1\_ d1qqp3\_ g1fmd.1  
d2x5ic\_ d1rhi3\_ g1oop.1\_ d1hxs1\_ g1hxs.1\_ d1fnp3\_ d1bev1\_ g2mev.1  
d1eah3\_ d1aym1\_ d1pvc3\_ d1qqp1\_ d1zba3\_ d1h8ta\_ d3vbhc\_ g1b35.1  
g1bev.1\_ d1hxs3\_ g1ev1.1\_ d1bev3\_ g1tmf.1\_ d1tmf1\_ d1b35a\_ d2mev3\_  
g1eah.1\_ g1h8t.1\_ d1eah1\_ d4q4w3\_ d1r1a1\_ d1aym3\_ d1pvc1\_ d1zba1\_  
d1h8tc\_ d1oopc\_ d1tme3\_ g1qqp.1\_ d4iv1c\_ g1tme.1\_ d3ubub\_ d1legia\_  
d1qo3c\_ d1v7pa\_ d1tdqb\_ d3ubua\_ d1c3ab\_ d1h8ua\_ d3bx4b\_ d1t8ca1  
d1sb2a1\_ d1qdda\_ d2ziba1\_ d3cada\_ d1byfa\_ d1j34b\_ d1jwia\_ d1jzna\_  
d1c3aa\_ d1wmza\_ d3bdwb\_ d1hq8a\_ d1fifa1\_ d1dv8a\_ d3hupa\_ d1wk1a1  
d1umra\_ d2afpa\_ d3bx4a\_ d1gz2a\_ d1sl6a\_ d1v7pb\_ d3g8ka\_ d1ixxa\_  
d1j34a\_ d1jwib\_ d1g1sa1\_ d1y17a1\_ d1ja3a\_ d1fvub\_ d3bdwa\_ d1sb2b1  
d1fvua\_ d1umrc\_ d1oz7a\_ d4m17a\_ d3cfwa1\_ d1ypqa1\_ d1g1ta1\_ d3fd4a\_  
d3l9jc\_ d4dn8a1\_ d1v4lb\_ d1rd11\_ d2msba\_ d3exra\_ d2ffca1\_ d2fdsa1  
d3n3ma1\_ d2czda\_ d1q6oa\_ d2yyua\_ d1vqta1\_ d1dbta\_ d3ldva1\_ d1ux8a\_  
d1dlya\_ d4i0va\_ d2bkma\_ d2bmma\_ d2r80b\_ d1cqxa1\_ d1cg5a\_ d1gcvb\_  
d3boma\_ d2h8fb\_ d2raoa\_ d3bj1a\_ d4hrrb\_ d2r50a\_ d3d1kb\_ d2aalb1  
d3zhwa\_ d3hf4b\_ d3gdja\_ d1jebb\_ d3bj1b\_ d1x9fb\_ d1wmub\_ d1gcva\_  
d3bcqb\_ d3d4xb\_ d1gvha1\_ d2dc3a\_ d3hf4a\_ d4yu3a\_ d3k8ba\_ d1qpwb\_  
d2r80a\_ d3bcqa\_ d1v4wa\_ d3wtgb\_ d1j17a\_ d4esaa\_ d1a9we\_ d3d1ab\_  
d1fsla\_ d4h21a\_ d1v4wb\_ d1mwca\_ d1vhba\_ d1jeba\_ d1spgb\_ d1h97a\_  
d1q1fa\_ d1tu9a1\_ d3d1aa\_ d1hdsb\_ d3hyub\_ d2zfb\_ d3fs4a\_ d1oj6a\_  
d1shrb\_ d4h21b\_ d4yu3b\_ d1spga\_ d3hrwa\_ d3qqra\_ d3at5a\_ d4wchd\_  
d3hyua\_ d1cg5b\_ d1uc3a\_ d1hbra\_ d2raob\_ d1outb\_ d4esab\_ d3gdjb\_  
d3qqqa\_ d1x9fc\_ d3vrfa\_ d1itha\_ d3mkba\_ d3d4xa\_ d3mjpa\_ d1j16a\_  
d3fh9a\_ d1outa\_ d2dc3b\_ d1lit2a\_ d3eoka\_ d3g46a\_ d1qpwa\_ d3vrfb\_  
d1ch4a\_ d1x9fd\_ d1hdsa\_ d2zfba\_ d3mkbb\_ d1or4a\_ d3wtga\_ d1a4fa\_  
d3fh9b\_ d3bomb\_ d3cy5a\_ d3at5b\_ d1x9fa\_ d2oifa\_ d4lmb\_ d1cpcb\_  
d3v57a\_ d1kn1a\_ d1cpca\_ d4f0ta\_ d2vjha\_ d4po5b\_ d1eyxa\_ d1alla\_  
d4f0tb\_ d1b33b\_ d1b8db\_ d4h0mb\_ d1b33a\_ d2vjhb\_ d4lm6b\_ d2vmlb\_  
d1allb\_ d2vjta\_ d3dbja\_ d2vmla\_ d2vjtb\_ d4f0ub\_ d1f99b\_ d4rmpa1  
d1liaa\_ d1eyxb\_ d2uulb\_ d4lmsb\_ d4f0ua\_ d2bv8a\_ d1f99a\_ d2bv8b\_  
d2c7lb\_ d3dbjb\_ d4rmpb1\_ d1b8da\_ d4h0ma\_ d3v57b\_ d1liab\_ d2uula\_  
d2j96a\_ g1gxs.1\_ g1wht.1\_ d1azwa\_ d2xqfa\_ d1ea5a\_ d1f6wa\_ d1qe3a\_  
d1k4ya\_ d4qwwa\_ d2ha2a\_ d3c8da2\_ d2pbla1\_ d1jkma\_ d1jjia\_ d1lzla\_  
d2i49a\_ d1nnfa\_ d1xvxa\_ d1ursa\_ d1h3da1\_ d1iuda\_ d4m1va1\_ d1twya\_  
d3e13x\_ d2nxoa1\_ d4pfua\_ d3ttma\_ d1elja\_ d2qmwa1\_ d1us5a\_ d1y3na1  
d1jeta\_ d1uqwa\_ d4f19a1\_ d2esna2\_ d3thia\_ d3fasa1\_ d2uyeb\_ d2xwva1  
d1r9la\_ d2fyia1\_ d1pb7a\_ d2ozza1\_ d1sw5a\_ d1nh8a1\_ d1vr5a1\_ d2g29a\_

d1xs5a\_ d3lswa\_ d2z23a\_ d3w9va\_ d3tcha\_ d1q35a\_ d1z7me1 d3q27a\_  
d1p99a\_ d1ve4a1 d2i6ea1 d4mcoa1 d4n8ya\_ d1eu8a\_ d1zbma1 d1hsla\_  
d1ixca2 d1j1na\_ d1xvya\_ d1y9ua\_ d2z22a1 d1xoca1 d4oera\_ d1wdna\_  
d5f1qa1 d1xt8a1 d1i6aa\_ d4gwoa\_ d4igta1 d1pc3a\_ d4mmpa1 d1o63a\_  
d2czla1 d2onsa2 d4mija1 d2qvba\_ d2v9za\_ d4kafa1 d2m5ta\_ d1cqqa\_  
d1wqsa\_ d5bpea\_ d2ipha\_ d1lvoa\_ d2bhga1 d3tnta\_ d3sjia\_ d3d23a1  
d2fyqa\_ d3tloa\_ d3zvea1 d2hrva\_ d3q3ya1 d4asha1 d1jmxa4 d1pbya3  
d1pbya4 d1s5ja2 d1qhta2 d4dlea2 d1tgoa2 d3py8a2 d1q8ia2 d1kfsa2  
d2py5a2 d1d5aa2 d1dosa\_ d1gvfa\_ d3qm3a1 d2fjka\_ d1f74a\_ d3l21a\_  
d2e1da\_ d1to3a1 d1w3ia\_ d1sfla\_ d1n7ka\_ d1vcva1 d4imea\_ d1wa3a\_  
d2ocza1 d1f2ja\_ d3m16a\_ d2yxga\_ d1ub3a\_ d3a5fa\_ d1fbaa\_ d1l6wa\_  
d1xfba1 d1wx0a1 d1vpxa1 d1mxsa\_ d2a4aa1 d1xkya1 d3cq0a1 d3s1xa\_  
d1f05a\_ d1fdja\_ d3cpra1 d4d2ja\_ d1e88a1 d1l6ja5 d1l6ja4 d1leaka4  
d1leaka3 d1l6ja3 d1h8pa2 d1h8pa1 d3rp2a\_ glucy.1 d1fuja\_ d2zchp\_  
d3w94a\_ d1si5h\_ d1l06a\_ g2pka.1 d1cgha\_ d1kigh\_ d1a5ia\_ d3s9ba\_  
d1hj8a\_ d1ao5a\_ d2anya\_ d1q3xa1 d1gvza\_ d4gsoa\_ d2f91a1 d1liau\_  
d1gdna\_ d1eufa\_ g1fiw.1 d1eq9a\_ d4nfea\_ d2rdla\_ d1spja\_ d1elva1  
d1a7sa\_ d1ekbb\_ d1pfxc\_ d1yc0a\_ d2aiqa\_ g1fiz.1 d1fi8a\_ d4k60a\_  
d4dgja\_ d1mzaa\_ d1op0a\_ d3tjva\_ d1pytd\_ d1sgfg\_ g1gg6.1 d2eeka\_  
g1rtf.1 d1a0ja\_ d3g01a\_ d1pytc\_ d4e7na\_ d1ddja\_ d1z8ga1 d2hlca\_  
d1npma\_ d1brup\_ g1jou.1 d1sgfa\_ d1autc\_ g2hnt.1 g1kdq.1 d1orfa\_  
d3s69a\_ d4crga\_ d1fxya\_ d1bqya\_ d1ra6a\_ d1muka\_ d3gsza\_ d1khva\_  
d1te9a\_ d2xwha\_ d3uqsa\_ d3hkwa\_ d3n6ma\_ d2cjqa\_ d2xyma\_ d1teba\_  
d1te8a\_ d1s48a\_ d1u09a1 d4wfxa\_ d3tyqa\_ d2pgga1 d1m4la\_ d2bk7a\_  
d3fjua\_ d1z5ra1 d1kwma1 d1uwya2 d1jqga1 d2c1ca1 d1dtda\_ d1h8la2  
d1e69a\_ d1mv5a\_ d3g60a4 g1ii8.1 d1ewqa2 d1ji0a\_ d1qhla\_ d1v43a3  
d2wmfa1 d1vpla\_ d1g2912 d4a82a2 g1f2t.1 d2d62a1 d3tuic1 d2bbsa1  
d3g60a3 d2ixea\_ d1g6ha\_ d1sgwa1 d2qi9c\_ d3rlfa1 d3b60a1 d3d31a2  
d2pzea1 g1xew.1 d1jj7a\_ d1oxxk2 d2onka1 d1w1wa\_ d1iwea\_ d1qf5a\_  
d1vmaa2 d1nija1 d2p67a1 d3ihla\_ d1okkd2 d1ls1a2 d1slma2 d1liona\_  
d2v40a\_ d1dj3a\_ d3hida\_ d2vo1a1 d2g0ta1 d1vcoa2 d1j8mf2 d1g3qa\_  
d1xjca\_ d1p9ba\_ d1qzxa3 d1ihua2 d1ihua1 d2qm8a\_ d1dj2a\_ d4ioja\_  
d1cp2a\_ d1yrba2 d1hyqa\_ d1gkub1 d1gkub2 d1eh3a\_ d3skpa\_ d1dtza1  
d1dtza2 d1ieja\_ d1jnfa2 d1ce2a1 d1jnfa1 d1b1xa2 d1jw1a1 d1jw1a2  
d1ryoa\_ d1h76a1 d1h76a2 d1c4oa1 d2p6ra3 d2p6ra4 d1oywa2 d1oywa3  
d1wrba1 d1w36b2 d1w36b1 d1c4oa2 d3bora\_ d1t6na\_ d2eyqa5 d2eyqa3  
d2eyqa2 d2zu6a2 d1veca\_ d1w36d1 d2g9na1 d1z3ix2 d2rb4a\_ d1hv8a1  
d1hv8a2 d1t5ia\_ d1w36c2 d2j0sa2 d2j0sa1 d1fuka\_ d3hjha1 d1z5za1  
d1qdea\_ d1z63a1 d1s2ma2 d1s2ma1 d1wp9a1 d1wp9a2 d1gm5a3 d1gm5a4  
d3dina4 d3dina3 d1q0ua\_ d1w36c1 d1z3ix1 d1nkta3 d1nkta4 d1uaaa2  
d1w36d2 g1qhh.1 d2fwra2 d2fwra1 d2v8ta\_ d3q3ma\_ d1za0a1 d1mxra\_  
d2inca\_ d1jk0a\_ d2incb\_ d1mhyb\_ d3hf1b\_ d1mtyb\_ d1r2fa\_ d2uw1a\_  
d1mhyd\_ d3n37a\_ d1afra\_ d1syya\_ d1mtyd\_ d2o1za\_ d1uzra\_ d1smsa\_  
d2fkza\_ d1zujal d1s3qa1 d2fjca1 d1z6om1 d1veia\_ d4dyya\_ d1jiga\_

d3gvya\_ d2pyba\_ d4cy9a1 d3bvfa1 d1r03a\_ d2cf7a\_ d1nf4a\_ d1zs3a1  
d4iwka\_ d3ka8a\_ d3np0x\_ d1n1qa\_ d1l1b3a\_ d4e6ka\_ d1z6oa1 d2fzfa1  
d4dyua\_ d3ge4a\_ d1jgca\_ d4am4a\_ d2z6ma\_ d1ji5a\_ d1vlga\_ d1lkoa1  
d1krqa\_ d3qz3a\_ d2ffxj\_ d1euma\_ d1yv1a1 d2v2pa\_ d1j30a\_ d4di0a\_  
d1dpsa\_ d1oewa\_ d2qzxa\_ d2asia\_ d1psoe\_ d1smra\_ d2h6ta\_ d1pfza\_  
d1izda\_ d3hd8a\_ d1j71a\_ d1dpja\_ d4aa9a\_ d1t6ex\_ g1b5f.1 g1lya.1  
g1htr.1 d1qdma2 d1bxoa\_ d1wkra\_ d1tzsa\_ d1libqa\_ d2qzwa\_ d1bdqa\_  
d3ggta\_ d3ixoa\_ d1mrxa\_ d2haha\_ d1tw7a\_ d4nj3a\_ d1sgua\_ d2p3da\_  
d1nsoa\_ d3d3ta\_ d2rkfa\_ d1c6ya\_ d2rspa\_ d3ogpa\_ d3ekwa\_ d2o4na\_  
d2j9ja\_ d1baia\_ d3ggua\_ d3l3za\_ d4npua\_ d4j55a\_ d2r8na\_ d2fxda\_  
d2p3ca\_ d4dgea\_ d3ttpa\_ d3t3ca\_ d2p3aa\_ d2hc0a\_ d2fdda\_ d3mwsa\_  
d1um8a\_ d1ixza\_ d1qvra2 d1qvra3 d1qzma\_ d1sxjc2 d1jr3d2 d2p65a\_  
d1l8qa2 d1g8pa\_ d3hu3a3 d1sxjd2 d1njfa\_ d1in4a2 d1sxja2 d1tuea1  
d2ce7a2 d1w5sa2 d1sxjb2 d1d2na\_ d1ny5a2 d1ofha\_ d2gnoa2 d2a5yb3  
d1fnna2 d1u0ja1 d1l1v7a\_ d1iqpa2 d2fnna2 d1ixsb2 d4gita\_ d1sxje2  
d1k8rb\_ d1wgra1 d1ef5a\_ d1wfy1 d1e8ya3 d1wgya1 d1lfda\_ d2cs4a1  
d1wxma1 d2byea1 d3kh0a1 d2byfa1 d1wxaa1 d1e7ua3 d1wgda1 d1wgg1  
d4q5eb\_ d1wjna1 d1se9a\_ d3n3kb\_ d1wz0a1 d1we6a1 d2m0xa\_ d2gbka\_  
d3rt3b1 d1wh3a1 d1sifa\_ d2ekec2 d4ii2b1 d4hk2a1 d1c3ta\_ d1m94a\_  
d1wgha1 d1ttna1 d1j8ca\_ d1wx8a1 d3v6cb1 d2ma9b\_ d4i6lb1 d1bt0a\_  
d2jvca1 d1iyfa\_ d2k1fa\_ d1wxva1 d1wf9a1 d1t0ya\_ d2io0b2 d1x1ma1  
d2gbma\_ d1zw7a1 d2m17a\_ d1we7a1 d2l1wpa\_ d2gbja\_ d1wjua1 d1v6ea1  
d1v86a1 d4eewa\_ d1wiaa1 d4icva\_ d4gu2a\_ d1wx7a1 d1wy8a1 d4h1ka1  
d2faza1 d1v5oa1 d3ruib\_ d3waob\_ d2r2qa1 d3m95a\_ d3wana\_ d1ps9a2  
d1o94a2 d1cjca1 d1yvca1 d1yeza1 d4lu0a\_ d1of8a\_ d3unda1 d3e9aa1  
d1vr6a2 d1n8fa\_ d2qkfa\_ d1o60a\_ d1pn0a1 d1reoa1 d1ju2a1 d2f5va1  
d3c96a1 d2gmha1 d1pj5a2 d1gpea1 d1n4wa1 d1k0ia1 d2dw4a2 d2ivda1  
d1seza1 d2voua1 d1kdga1 d1adqa1 d1fnga1 d1uvqb1 d1zs8a1 d2vola1  
d2vola2 d1mfb12 d2jelh2 d1uwel2 d3qq4b1 d1k1vb\_ d1k5na1 d1osph2  
d4odh12 d1ow0a1 d1ow0a2 d1bfob2 d3l9ra2 d3jtth1 d2fath2 d4elkb2  
d1fn4b2 d2xfxb\_ d1pg7x2 d1cqka\_ d4k71b2 d1l1k2a1 d1eapb2 d4l1fhg2  
d1i4fa1 d2nw2a2 d1kfah2 d1mhca1 d1h3ua1 d1wejh2 d1h0db2 d1a5fh2  
d1kcvh2 d1mjuh2 d1qqda1 d1kcrh2 d1k8ia1 d3huja2 d2nnab1 d1nfd2  
d3mffb2 d1s9va1 d1l1k3h2 d1q0xl2 d1fv1b1 d1neza1 d4rfeb2 d1r3ha1  
d1a6tb2 d1kjva1 d1pz5b2 d1onqa1 d2bc4a2 d1de4a1 d1k8da1 d1tcra2  
d1dn0b2 d1nfde2 d2xwtb2 d1bfoa2 d1mexh2 d1iakb1 d1ypzf2 d4f7ea2  
d1q72l2 d2fbjh2 d1fe8h2 d1clzh2 d1fngb1 d1uvqa1 d1vgka1 d1c16a1  
d4j12a2 d4x99b2 d1igtb3 d1je6a1 d1q72h2 d1nldh2 d1teth2 d2hmic2  
d1i1ca2 d1i1ca1 d1k8ib1 d1q0yh2 d1kfa12 d3frua1 d1pg7w2 d1u58a1  
d1igyb4 d1igyb3 d1hyrc1 d1klub1 d1deeb2 d1c12b2 d2bc4b2 d2ig2h2  
d1kcv12 d3wn5b1 d1l1k2b\_ d1l1k3l2 d1mjul2 d1sm3h2 d1q0xh2 d1zvsa1  
d1ydp1 d1u8ib2 d1ypze2 d1kcu2 d1svpa\_ d1mbma\_ d3su6a1 d1cu1a1  
d4agka\_ d1vcpa\_ d1q31a\_ g1n1l.1 d3e90b\_ d3u1jb\_ d2e3fa\_ d1mm0a\_  
d2e3ea\_ d2l1da\_ d2ny8x\_ d2e3ga\_ d2ny9x\_ d2nz3a\_ d2l1j7a\_ d1n4na\_

d2m8bb1 d2kyqa\_ d3psma\_ d1jkza\_ d1jxca\_ d2g11a\_ d1ugla\_ d4uj0a\_  
d2k4ua\_ d1hp2a\_ d21u9a\_ d1baha\_ d2meoa1 d1wm7a\_ d1hlya\_ d1n8ma\_  
d1jlza\_ d1wpda\_ d1c55a\_ d1pvza\_ d1wt7a\_ d1wz5a\_ d1m2sa\_ d1pjva\_  
d1c49a\_ d1qkya\_ d2ktca1 d1wmta\_ d1du9a\_ d1j5ja\_ d1r1ga\_ d1t0za\_  
d2i61a\_ d1t1ta\_ d1sn4a\_ d1kv0a\_ d21kba\_ d1npia\_ d1wwna\_ d1pe4a\_  
d2kbka\_ d21i7a\_ d1djta\_ d2kbha\_ d1dq7a\_ d1sega\_ d1omya\_ d1zywa1  
d1jzaa\_ d1n9wa1 d1bbua1 d1c0aa1 d1b8aa1 d1l0wa1 d3a74a1 d1eova1  
d1t61c1 d1iyjb4 d1iyjb5 d1iyjb3 d1o7ia\_ d4ipca1 d1x3ea\_ d4apva\_  
d1jb7a1 d1jb7a2 d1jb7a3 d3kdfa\_ d1ue1b\_ d1wjja1 d3eiva\_ d1xjva2  
d1xjva1 d2ccza2 d1se8a\_ d1l1oc\_ d1jb7b\_ d1qvca\_ d3ulla\_ d1qzga\_  
d1miua4 d1miua5 d1miua3 d1y14b1 d2nn6i1 d1i94l\_ d2zjra2 d1smxa\_  
d2qamc2 d1hh2p1 d2r7da1 d1rl2a2 d1wfga1 d3bzka4 d1x6oa2 d3a0ja\_  
d2j01d2 d2ja9a1 d4q15a\_ d1hr0w\_ d1luza\_ d2n3sa\_ d2vnud1 d1h95a\_  
d1go3e1 d2nn6h1 d1ne3a\_ d2mo1a\_ d1iz6a2 d1jjga\_ d1e3pa2 d2ix0a3  
d2ix0a2 d21xja\_ d1ueba3 d1ueba2 d2z0sa1 d1u01a1 d2ix0a1 d2eifa2  
d2je6i1 d3i2za1 d2c35b1 d2ahob2 d1t9ha1 d3i4oa\_ d2qall1 d1jt8a\_  
d2nn6g1 d1g6pa\_ d3cama\_ d1i94q\_ d1c9oa\_ d1d7qa\_ d2ba0a1 d2vnud2  
d2vnud3 d1khia2 d2qalq1 d1wi5a1 d1xtda2 d1ny4a\_ d1prtc2 d1prtb2  
d1pfsa\_ d2a1ka\_ d1rpma\_ d2shpa1 d1yfoa\_ d2ooqa1 d1g4us2 d1p15a\_  
d1lara2 d1lara1 d1wcha\_ d2fh7a2 d2fh7a1 d1ohea1 d1ohea2 d2f4da\_  
d1rxda\_ d2hxpa\_ d1xria\_ d1d5ra2 d1fpza\_ d3ezza\_ d4y2ea\_ d1i9sa\_  
d1tdha3 d1q3ba3 d1ee8a3 d1k82a3 g1qmo.1 g1len.1 d3zyra\_ d1fnya\_  
d1n47a\_ g21tn.1 d1avba\_ d3usua\_ d1dhkb\_ d1f9ka\_ d1lukga\_ d1g8wa\_  
d1g9fa\_ d1wbf\_a\_ d3wcsa\_ d1g7ya\_ g1loe.1 d1mvqa\_ d1hq1a\_ d1v6ia\_  
d1dbna\_ d1qnwa\_ d1fx5a\_ d418qa\_ d1ioaa\_ d3n35a\_ d3ubra\_ d1qo8a1  
d1d4ca1 d2k3va\_ d1ft5a\_ d1qdba\_ d1m1qa\_ d2j7aa\_ d1h21a\_ d1ogyb\_  
d4fasa\_ d1jnia\_ d1oaha\_ d1sp3a\_ d3h33a\_ d1rwja\_ d19hca\_ d1os6a\_  
d3bxua\_ d3h4na\_ d1i77a\_ d3caoa\_ d1j0pa\_ d2ctha\_ d1duwa\_ d1ofwa\_  
d2e84a\_ d1hh5a\_ d1gyoa\_ d3h34a\_ d1wioa4 d1ccza2 d1vcaa1 d1ic1a1  
d2d9qb1 d2nxyb2 d2dara2 d2dara1 d1wyha2 d2dloa2 d1rutx4 d1rutx3  
d2cuqa2 d1x41a2 d1x41a1 d1x3ha2 d1x3ha1 d2d8za1 d1x61a2 d1x6aa1  
d1x6aa2 d2cora2 d2cora1 d1v6ga1 d1v6ga2 d2d8za2 d1x64a1 d1x64a2  
d1b8ta1 d2co8a1 d1x63a2 d2dj7a2 d2dj7a1 d2cu8a2 d2cu8a1 d1g47a2  
d1g47a1 d1wyha1 d2dloa1 d1wiga1 d1wiga2 d2cupa2 d2cupa3 d1x68a1  
d2d8ya2 d2d8ya1 d1m3va2 d1x62a1 d1x68a2 d1x61a1 d1b8ta3 d1b8ta2  
d2d8xa2 d2d8xa1 d1x4ka1 d1x4ka2 d2cuqa1 d1m3va1 d2co8a2 d1j2oa2  
d1x63a1 d2cura1 d2cura2 d1x62a2 d1op9a\_ d1y01a1 d1letzb1 d1legj11  
d2gsib1 d1nj9a1 d4jfhdl d1aqk11 d1t2ja\_ d1l04h1 d1zvyal d3v4v11  
d4enec1 d1kxtb\_ d5e8ea1 d2pxya\_ d4weud\_ d1xiwc\_ d2esvd1 d1qnzh\_  
d1logae1 d1f4xh1 d4n1hb\_ d3ezjb1 d3mlw11 d1kfah1 d1letza1 d1b4jh1  
d3cfic\_ d4w68a\_ d2arja1 d1ek3a\_ d2ok011 d1vera\_ d1uwgh1 d1blnb1  
d1fpth1 d1rzga1 d2giya1 d4m3kb1 d1nc2a1 d2nyyd1 d1ncna\_ d1fbih1  
d5dxwa\_ d4fqqa1 d1dqdh1 d1jfq11 d1kelh1 d1faih1 d1frgl1 d1figl1  
d4m6n11 d1fo0a\_ d4hxb11 d3b5ga\_ d3quyd1 d2h9gb1 d1i8kb\_ d2dd8h1

d2ck0h1 d1eaja\_ d4w6wb1 d2a6ib3 d1t66d1 d2e27h\_ d1ob1b1 d1f11b1  
d2v7na1 d1ad0a1 d2xt1b1 d1pskh1 d4i13b1 d2op4l1 d1a0ql1 d1uwel1  
d1za3a1 d1ncb11 d4uu9a\_ d1bm3h1 d1cloh1 d1nqba2 d1cf8h1 d4y5va\_  
d1mhph1 d5anma1 d4cdgc1 d4ldeb\_ d1y01b1 d2pcpb1 d1z3gl1 d1dfb11  
d1fh5h1 d3g5xa1 d1tzib1 d4dn3l1 d3zhka1 d2b1hh1 d2uy1a1 d1f3dh1  
d1nj9b1 d2agjh1 d2h1p11 d1q72h1 d8fabb1 d1ndmb1 d1rjca1 d4u6hb1  
d3upca\_ d2fbj11 d1osph1 d1tvda\_ d2cjev\_ d4fhbd1 d1bd2d1 d1rz7h1  
d3nn8a\_ d1knoa1 d1nfdal d2bmkb1 d1dq11\_ d1igyb1 d1igfl1 d12e8h1  
d3utza1 d1nc2b1 d1rihh1 d4mwfb1 d4jvpa1 d1mieh1 d1rhfa1 d1fgn11  
d1sbs11 d1lp9e1 d1dn0a1 d4lqf11 d1iaih1 d1kgcd1 d1mh5b1 d1gpol1  
d2g60h3 d1f8t11 d2jixd1 d4grwh\_ d1fo0b\_ d1bfob1 d1axsa1 d1u9ka\_  
d1nmbh\_ d1h8na1 d1h8na2 d1jguh1 d4eura1 d3sdy11 d35c8h1 d1w72l1  
d1mvub\_ d1i9rh1 d1ob1a1 d4wenb\_ d1yeeh1 d3ietc1 d1f58h1 d1ad0b1  
d1mqk1\_ d1nbvh1 d4b50a\_ d3r8bb\_ d1baf11 d1mamh1 d4rgne1 d2gsgb\_  
d35c8l1 d1bafh1 d1ai1h1 d2pcpa1 d2fath1 d2x1pa\_ d1orsb1 d1libg11  
d1shma\_ d1a2yb\_ d1u0qa\_ d2coqa\_ d1hilb1 d1qfwi\_ d1jv5b\_ d1fn4b1  
d5e0qa\_ d1nsnh1 d1plg11 d4ocx11 d1kb5h1 d1rzfh1 d1pg7x1 d2fx7h1  
d2oi9c\_ d1l7il1 d3eyva1 d1d5il1 d4ffyl\_ d1tet11 d1a6wh\_ d1ac6a\_  
d3dvfa\_ d1nfdel d1mimh1 d1ri8a1 d1jhlh\_ d3dura\_ d1fskb1 d1f97a1  
d3so3b1 d2ak4d1 d1lp9f1 d4z7wf1 d1l7th1 d4y5ya\_ d4x7ec1 d1emth1  
d1ikf11 d1nlbh1 d4utal1 d1bjma1 d1eapb1 d1u6ah1 d2dtgd1 d1kj2b\_  
d1xeda1 d1cleh1 d1fgvh\_ d2bnub1 d2fb4h1 d2dtgb1 d1ktrh\_ d1jpth1  
d1qkz11 d4hepg\_ d2atpb1 d1flrh1 d2hrpl1 d1mvfa\_ d1iaim1 d3k80a1  
d2jb5h1 d3zkxc\_ d4grwe\_ d1it9h1 d1rhhb1 d3w9ec\_ d1e4wh1 d1sy6h1  
d2j6eh1 d3qxta\_ d1jglh1 d1p7ka1 d1tzhb1 d4n8pa1 d1gaf11 d2jelh1  
d1wioa2 d4i0cc1 d1cicb1 d1lmka2 d1lmka1 d1iqwh1 d1lorqb1 d1ejoh1  
d1jnlh1 d4zg1a\_ d43c9b\_ d1ggbl1 d1wejh1 d3q6fa1 d1f3dj1 d3c6la1  
d1bq1h1 d3p9wb\_ d1a3r11 d1h0db1 d2uzil\_ d1eo8l1 d1qfwl\_ d1n7ml1  
d1igja1 d1c5ch1 d2a9mh\_ d1rmfh1 d1fj1b1 d4heme\_ d1ccza1 d1a5fh1  
d1ogad1 d1dlfh\_ d1qa9b\_ d1vgel1 d3qskb\_ d1sjxa\_ d4ozfg1 d1sq2n\_  
d1qd0a\_ d1kcvh1 d1c5db1 d3qcull1 d8faba1 d3bn9d1 d1mjuh1 d4y8dc\_  
d7fabh1 d3dvgb1 d1lo0l1 d1a6tb1 d1gigh1 d1kcrh1 d2hwz11 d1yjdc1  
d3clf11 d4krna\_ d1d17l\_ d1e6ol1 d1mexh1 d3r0ma\_ d4kkna\_ d1fns11  
d1oaqh\_ d1rzia1 d1lucbh1 d1ncw11 d4b41a\_ d1nfdfl1 d2mpah1 d2d7t11  
d4grwf\_ d4b5ea\_ d1lk3h1 d3u79a\_ d4u3xa\_ d1ghfl1 d1bvkb\_ d1mcww1  
d1b88a\_ d1jrhh1 d32c2b1 d4wemb\_ d1dsfh\_ d1op3h1 d1cel11 d1iqda1  
d1qoka1 d1qoka2 d1qfuh1 d2crya1 d1ay1h1 d1oaql\_ d3ab0b\_ d1rur11  
d1t4kb1 d1bz7b1 d1n0xh1 d1for11 d1lucb1 d4w6yb\_ d43c9a\_ d2aab11  
d1tzia1 d4n1ca\_ d1k6qh1 d3g9ab\_ d4tvsa1 d1igmh\_ d1pz5b1 d3dx9a1  
d3wxwh\_ d1nakh1 d1kcul1 d3eaka\_ d4qlra1 d1cr9l1 d1d9ka\_ d1f4xl1  
d1deea1 d2i27n2 d1c12a1 d2orb11 d1j8hd1 d1mcph1 d1c5da1 d1kenh1  
d1bd2e1 d1h5ba\_ d4x7fc1 d3upaa\_ d1t3fa1 d1indh1 d2dtgc1 d4hc111  
d1zv5a1 d4wgvb\_ d1uwgl1 d4f37k1 d1aqkh1 d1vesa\_ d3zkqd\_ d1fpt11  
d1lo4l1 d1knob1 d3rrqa\_ d1ct8b1 d4orz\_ d1mlbb1 d4hgkc1 d1dqdl1

d1bogb1 d4ozhe1 d1dr9a1 d1i7za1 d1dn0b1 d1kell1 d1rzib1 d1ypzf1  
d1wtla\_ d1hkfa\_ d1fail1 d1figh1 d2vyre\_ d1sjva\_ d1lohqa\_ d1bfoa1  
d1pkqbl d1mjul1 d1b4jl1 d1nsl1 d2arjb1 d1p4bh\_ d4aj0a\_ d3nn8b\_  
d2rcja1 d1f2xk\_ d4v1dd\_ d1adqh1 d2eksa\_ d4k3ga\_ d1jfqh1 d1uweh1  
d1frgh1 d4gftb\_ d1uz8b1 d4n1ea\_ d1bm3l1 d1clo11 d3mcka1 d2vq1a1  
d1ae6h1 d4aq1b1 d1uj3b1 d1nbqa1 d1fh5l1 d2ck0l1 d2ywza\_ d1q72l1  
d4nxbx\_ d1hila1 d4hz1b1 d2j88l1 d1zmya1 d1cd0a\_ d1a4ka1 d1pskl1  
d1a0qh1 d4krmb\_ d1ncbh1 d2fbjh1 d1j8he1 d1i3ua\_ d1cf8l1 d1fe8h1  
d2plya1 d1eeqa\_ d2x89a\_ d1o10a\_ d2r0lh1 d1ub5a1 d1dfbh1 d3eyvb1  
d4jdvb1 d4p2cg\_ d2gsia1 d2agjl1 d1u3ha1 d2h1ph1 d1rihl1 d1fskc1  
d1boga1 d2a77l1 d1osp11 d1qfoa\_ d3dwta\_ d2fx7l1 d1rz7l1 d3stba1  
d1pkqa1 d1b6da1 d1dzba2 d1dzba1 d1kj2a\_ d4l1ha\_ d1rzgb1 d1dqlh\_  
d12e8l1 d1mie11 d1jmaa\_ d1sbsl1 d1fgnh1 d1f58l1 d1mqkh\_ d1ndgb1  
d3qeg11 d1iail1 d2aw2a1 d1tqbc1 d3fo2a1 d4dkaa\_ d1f8th1 d2g60l1  
d2ywy\_ d1uj3a1 d1yc7a\_ d3bd3a\_ d4w6xb1 d1nmb1\_ d1i8ka\_ d1rjlb1  
d1ypze1 d1p7kb1 d1kxqe\_ d1gpoh1 d2z4qa1 d1w72h1 d1i9rl1 d4qgya1  
d4xt1c\_ d2qqnh1 d1cica1 d3c08h1 d2cd0a\_ d2bdnh1 d1hnga1 d1mam11  
d1nldh1 d1cr9h1 d4lcih1 d3bkyh1 d3qg7l1 d1ai1l1 d1kxvc\_ d4iosd\_  
d1l7ih1 d2x1qa\_ d1ub6b1 d3k74b\_ d1ibgh1 d1teth1 d1igya1 d1hxma1  
d2x6ma\_ d2e7la\_ d5e03a\_ d1qfwm\_ d2r0kh1 d1igjb1 d1rurh1 d1plgh1  
d1mj8h1 d1yuhb1 d3fmg11 d1rzfl1 d1emt11 d1ad9b1 d1igtb1 d1nlb11  
d1d5ih1 d3k7ua\_ d4ffyh\_ d1bwwa\_ d3dvga1 d1a6ta1 d1fgvl\_ d4qxgl1  
d1mim11 d1jh11\_ d2hffb1 d2hh0l1 d1qkzh1 d1l7tl1 d1afvh1 d1iaii1  
d2cjuh\_ d1um5h1 d2ghwb2 d2ghwb1 d1kgce1 d2fgwh1 d1ikfh1 d1dvfd\_  
d2i24n1 d2xtjb\_ d1za3b1 d2yc1a\_ d2hh0h1 d2x1oa\_ d1bvka\_ d1rjla1  
d5e7ba1 d1igta1 d1il1b1 d2fb4l1 d1mvua\_ d1jpt11 d32c2a1 d1fvca\_  
d1iqdb1 d2hrph1 d2p4ab\_ d4qo1a\_ d1p2cb1 d1wt5c\_ d1t4ka1 d5c1mb\_  
d1it9l1 d1bz7a1 d1b2wh1 d1e4wl1 d1jnl11 d1yedb1 d1za6b1 d3u7aa\_  
d1igfh1 d3gnml1 d1orsa1 d1wejl1 d1a2ya\_ d1hxmb1 d1gafh1 d2j4wh1  
d1pz5a1 d1j05a\_ d1a3rh1 d4fq1l1 d1qfwh\_ d1eo8h1 d1n7mh1 d4s11a\_  
d1kegh1 d5da4a\_ d1iqwl1 d3whxb1 d1vgeh1 d1deeb1 d1c12b1 d1t2ql1  
d1ad9a1 d3gsnb1 d3b2uc1 d1ggbh1 d1t3fb1 d1nak11 d4ocmc\_ d1lila1  
d2v7hb3 d2esve1 d1mcoh1 d2qr0b1 d2q3aa\_ d1ct8a1 d1kcr11 d2pxyb\_  
d2uzih\_ d5c3ld\_ d3durb\_ d1c5cl1 d2ak4e1 d1dl7h\_ d1xiwd\_ d1mlba1  
d1rmfl1 d1i7zb1 d1dlfl\_ d2xa3a\_ d5bq7b1 d1dqqb1 d3h42l1 d1egjh1  
d1kcv11 d1fe8l1 d2j6e11 d1f3rb2 d1lk3l1 d1sm3h1 d1q0xh1 d1ghfh1  
d7fab11 d1igch1 d1lo0h1 d4idla\_ d5c2b1\_ d1jrh11 d1lila1 d3zhda1  
d4kfcz\_ d1b0wa\_ d1e6oh1 d1mexl1 d4krpb\_ d1fnsh1 d1ncwh1 d4hgma\_  
d4eigb1 d4rzca\_ d2mpal1 d4y5xa\_ d5en2b1 d3lrga1 d4ej1c1 d1rhha1  
d1j05b\_ d1forh1 d1q9wb1 d2wzpd\_ d2aq2a1 d1h0da1 d3revb1 d2ij0c1  
d1tzh1 d4m7jl1 d1k6ql1 d3b9kc1 d1igml\_ d3qeua1 d1dsfl\_ d1ce1h1  
d1kcu11 d1zvha1 d1zvoa1 d1tqbb1 d1ay1l1 d2qsc11 d2cgrh1 d1nl0h1  
d1ken11 d3eo0a1 d4n9ob1 d1n0xl1 d3k1kc\_ d1c4qa\_ d1prtc1 d2wv6d\_  
d1prtf\_ d1l1trd\_ d4l63b1 d1r4pb\_ d1prtd\_ d1tl0f\_ d2bosa\_ d1prtb1



d3chbd\_ d2aq2b1 d1ck1a1 d1lenfa1 d1i4pa1 d1v1oa1 d1et9a1 d1esfa1  
d2g9hd1 d4ohja1 d1klud1 d1bxta1 d1eu3a1 d1ty0a1 d1fnua1 d2qaln1  
d2cqva1 d1fhga\_ d2k1ma\_ d2d12a1 d1biha3 d1biha1 d1biha4 d3qp3a1  
d1g1ca\_ d1gxea\_ d1cvsc2 d1cvsc1 d1xmwa2 d1m4ka2 d2otpa2 d1biha2  
d1rhfa2 d2fcba2 d2fcba1 d1wwbx\_ d1lepfa1 d1lepfa2 d2dava1 d1waaa\_  
d1f97a2 d1x44a1 d1vcaa2 d1fnla2 d1fnla1 d3b5ha2 d3h8na2 d3h8na1  
d1jbj1a1 d1jbj2a1 d1pd6a\_ d1f2qa2 d1f2qa1 d3cx2a\_ d1nbqa2 d3b5ha1  
d1n26a1 d1xiwb\_ d1xaua\_ d1fltx\_ d2ifga1 d1olla1 d1olla2 d1cs6a4  
d1cs6a3 d1cs6a2 d1cs6a1 d2gw5a2 d1sy6a1 d1xiwa\_ d1ucta2 d1ucta1  
d1ry7b2 d1gl4b\_ d1qz1a3 d1olza1 d2c9aa1 d1wwca\_

**Family-71 (c.47.1.5)**

**Positive dataset contains 8 protein sequences.**

d2a2ra2 d2pvqa1 d1tw9a2 d3ik7a1 d4is0a1 d1z9ha2 d1tu7a2 d1zgm1

**Negative dataset contains 3992 protein sequences.**

d1m32a\_ d1libja\_ d1c7na\_ d4q75a\_ d2bkwa1 d1t3ia\_ d1n8pa\_ d1qz9a\_  
d1jf9a\_ d1leg5a\_ d1p3wa\_ d3kgwa\_ d1cl1a\_ d2ctza1 d1vjoa\_ d2rfva\_  
d1gc0a\_ d1cs1a\_ d1d2fa\_ d2ch1a1 d1qgna\_ d1pffa\_ d1elua\_ d1ux8a\_  
d1dlya\_ d4i0va\_ d2bkma\_ d1dlwa\_ d2bmma\_ d2cfba1 d1dfoa\_ d1o69a\_  
d1bj4a\_ d3k28a\_ d2bwpa\_ d3lg0a\_ d2fnua\_ d3ou5a\_ d1z7da1 d1b9ha\_  
d1iaya\_ d4msoa\_ d1bs0a\_ d1s0aa\_ d1sffa\_ d3tqxa\_ d1mdoa\_ d3qboa\_  
d3pgya\_ d1bjna\_ d2dkja\_ d1ejia\_ d1vefa1 d4wxga\_ d3bs8a\_ d3gbxa1  
d1w23a\_ d2tbvc\_ d1c8nc\_ d1x36a\_ d1smvc\_ d1ng0c\_ d4sbvc\_ d1lopa\_  
d1f2nc\_ d1ddla\_ d1e57b\_ d1auyb\_ d1dzka\_ d4tlja\_ d2a2ua\_ d4wfva\_  
d3t1da\_ d4i1axa\_ d3zq3a\_ d2nnda\_ d1i4ua\_ d1kxoa\_ d1bbpa\_ d1kt7a\_  
d1exsa\_ d3s26a1 d1lf7a\_ d1qfta\_ d4gh7a\_ d1z24a1 d1qabe\_ d1xkia\_  
d1ew3a\_ d3bx7a\_ d4iawa1 d1n0sa\_ d1gkab\_ d3kzaa\_ d2k23a\_ d2l9ca1  
d2joza1 d1gm6a\_ d3kffa\_ d3saoa1 d1e5pa\_ d1yupa1 d1iiua\_ d1f56a\_  
d1bypa\_ d1azca\_ d1ws8a\_ d3u25a\_ d1cuoa\_ d1id2a\_ d1rkra\_ d2iaac\_  
d4dp1x\_ d1nwpa\_ d2gima\_ d2i7sa\_ d1qhqa\_ d3ehbb1 d1fftb1 d1gyca3  
d1hfua2 d1kbva1 d1kbva2 d1sdda1 d1sdda2 d1gyca1 d1gyca2 d1mzya1  
d2bw4a1 d1aoza1 d1aoza3 d1aoza2 d1kyaa2 d1kyaa1 d1mzya2 d4e9sa1  
d1sddb1 d1sddb2 d1hfua1 d1hfua3 d1oe1a2 d1oe1a1 d1v10a2 d1v10a3  
d1v10a1 d2dara2 d2dara1 d1wyha2 d2dloa2 d1rutx4 d1rutx3 d2cuqa2  
d1x41a2 d1x41a1 d1x3ha2 d1x3ha1 d2d8za1 d1x61a2 d1x6aa1 d1x6aa2  
d2cora2 d2cora1 d1v6ga1 d1v6ga2 d2d8za2 d1x64a1 d1x64a2 d1b8ta1  
d2co8a1 d1x63a2 d2dj7a2 d2dj7a1 d2cu8a2 d2cu8a1 d1g47a2 d1g47a1  
d1j2oa1 d1wyha1 d2dloa1 d1wiga1 d1wiga2 d2cupa2 d2cupa3 d1x68a1  
d2d8ya2 d2d8ya1 d1m3va2 d1x62a1 d1x68a2 d1x61a1 d1b8ta3 d1b8ta2  
d2d8xa2 d2d8xa1 d1x4ka1 d1x4ka2 d2cuqa1 d1m3va1 d2co8a2 d1j2oa2  
d1x63a1 d2cura1 d2cura2 d1x62a2 d1pn0a1 d1reoa1 d1ju2a1 d2f5va1  
d3c96a1 d2gmha1 d1gpea1 d1o5wa1 d1n4wa1 d1k0ia1 d2dw4a2 d2ivda1  
d1seza1 d2voua1 d1kdga1 g1gk9.1 g1or0.1 g1e3a.1 d1a3qa1 d1iknc\_  
d3brda1 d1p7h11 d1imhc1 d1gjia1 d1zk9a1 d2cxka1 d2bema\_ d1pama1  
d1ea9c1 d1qhoa1 d2fhfa2 d2fhfa1 d1k3ia1 d1j0ha1 d1csla1 d2bhua1

d1edqa1 d1f1sa2 d1ut9a2 d1gvia1 d1txka1 d1zx5a1 d1qwra\_ d1jgta2  
d1ofda3 d1ecfa2 d1q15a2 d1ct9a2 d1ao0a2 d1te5a\_ d1ep0a\_ d2pa7a1  
d1wlta1 d1nxma\_ d2c0za1 d1ktja\_ d1ds6b\_ d1fstb\_ d1ex0a1 d1v70a\_  
d2f4pa1 d1yhfa1 d3gpdg2 d2q49a2 d1hdgo2 d2g17a2 d2cvoa2 d2czca1  
d3pwka2 d1obfo2 d1i32a2 d1zyao2 d2pkqo2 d1b7go2 d2hjsa2 d1cf2o2  
d1vkna2 d1nvmb2 d1eixa\_ d3exra\_ d2ffca1 d2fdsa1 d3n3ma1 d2czda\_  
d1q6oa\_ d2yyua\_ d1vqta1 d1dbta\_ d3ldva1 d2bjca1 d2hsga1 d1qpza1  
d1efaa1 d1u08a\_ d1lc5a\_ d1b5pa\_ d2ay1a\_ d3pd6a\_ d7aata\_ d2csta\_  
d1j32a\_ d1fg7a\_ d4wlha\_ d1o4sa\_ d1v2da\_ d1gdea\_ d1m6sa\_ d1v72a1  
d1svva\_ d1ajsa\_ d1wsta1 d2f8ja2 d1lk9a\_ d1vp4a1 d1xi9a1 d2gb3a1  
d1yaaa\_ d1au7a2 d1ic8a2 d2ovga\_ d1sq8a\_ d1rzsa\_ d3kz3a\_ d3orca\_  
d2b5aa1 d2ofya1 d4mcxa\_ d2xi8a\_ d2icta\_ d2bnma1 d2ppxa1 d1y7ya1  
d2m9wa1 d3dfxa\_ d2msya\_ d2djoa1 d2r5za\_ d1au7a1 d1f43a\_ d2lmda1  
d1akhb\_ d1s7ea1 d3nara\_ d1zq3p1 d2craa1 d1mija\_ d4uuta\_ d3a01a\_  
d1x58a1 d3rkqa1 d3cmya1 d2cqxa1 d2da6a1 d1e3oc1 d1fjla\_ d1mh3a1  
d1ig7a\_ d1x41a1 d1wh7a1 d1gt0c1 d2mw8a\_ d1x2ma1 d1b72a\_ d1wi3a1  
d1jgga\_ d1wjha1 d1x2na1 d1mnmc\_ d2cuea1 d3k2aa\_ d2hosa\_ d2jwta2  
d1pufa\_ d1octc1 d2hi3a\_ d1b8ia\_ d4j19a\_ d3lnqa\_ d1wh5a1 d1b8ib\_  
d1hcra\_ d1tc3c\_ d1gdta1 d1u78a2 d6paxa1 d6paxa2 d1k78a1 d1k78a2  
d1xg1a1 d1hlva1 d1hlva2 d1iufa1 d1igna2 d2iu5a1 d1zk8a1 d2g7sa1  
d2fd5a1 d2np5a1 d1z0xa1 d2id6a1 d2d6ya1 d2i10a1 d1vi0a1 d2oi8a1  
d3c07a1 d2ns7a1 d2fq4a1 d2yvea1 d1t33a1 d2o7ta1 d2np3b1 d2g7ga1  
d2gena1 d2fbqa1 d2g71a1 d2gfna1 d2g3ba1 d2jj7a1 d2hyja1 d1sgma1  
d1ui5a1 d2hkua1 d2id3a1 d4jyka1 d3lv8a\_ d1s3ga1 d1zaka1 d1s4qa\_  
d3tvta2 d1uf9a\_ d1khta\_ d1ckea\_ d1osna\_ d1p5zb\_ d4tmka\_ d3cm0a\_  
d1tmka\_ d1jaga\_ d3h86a\_ d1t0hb\_ d1nn5a\_ d2h92a\_ d3kb2a1 d2c95a1  
d1yj5a2 d1kgda\_ d1ly1a\_ d2ak3a1 d1vyva2 d1deka\_ d2grja1 d1p3ja1  
d1y63a\_ d1e4ya1 d1s96a\_ d3iija1 d1lvga\_ d1nksa\_ d1vyua2 d4e22a\_  
d1qf9a\_ d1jjva\_ d1q3ta\_ d1ki9a\_ d1lw7a2 d1teva\_ d1kjwa2 d1gsia\_  
d1m7ga\_ d1x6va3 d1g3ma\_ d1j99a\_ d1t8ta1 d1nsta\_ d1fmja\_ d1zrha\_  
d1ls6a\_ d2a3ra\_ d1aqua\_ d2zptx\_ d3ckla\_ d1texa\_ d1q44a\_ d2gwha\_  
d1k6ma1 d1z0ja1 d3umra2 d3gj0a1 d2gaoa1 d1yzga1 d1x3sa1 d1g7sa4  
d1puja\_ d1udxa2 d1kk1a3 d2o52a\_ d1jwyb\_ d1zcaa2 d1zcba2 d2fv8a1  
d2cjwa\_ d3dz8a1 d1xzpa2 d1vg8a\_ d4qxaa\_ d2ew1a1 d1x1ra1 d2bcgy\_  
d3doea1 d3cona\_ d3rega\_ d3wyga\_ d1upta\_ d2b6ha1 d1zd9a1 d1lnza2  
d1r5ba3 d1n0ua2 d1r2qa\_ d2f91a1 d2rhda\_ d3q3jb\_ d3q85a\_ d1efma1  
d1r8qa\_ d2gf9a1 d2akab1 d1ek0a\_ d1z08a1 d2gcoa1 d2dy1a2 d4g01b\_  
d2cxxa1 d1svia\_ d3q72a\_ d1ni3a1 d4ac9a4 d2erxa1 d2bmea\_ d1wxqa1  
d2gf0a1 d4ldja1 d1zunb3 d4lv5b\_ d1efca3 d1kmqa\_ d2g6ba1 d3lrpa\_  
d1tada2 d2y8ea\_ d4rd4a1 d1z06a1 d2heia\_ d3a58b\_ d1u01a2 d1d2ea3  
d1zj6a1 d2ocba\_ d3rwoa\_ d1mr3f\_ d2e9sa1 d4u5xa1 d2iwra\_ d2fn4a1  
d3bwdd\_ d2nzja1 d2atva1 d2ksqa\_ d3l43a\_ d1mkya2 d1mkya1 d1wmsa\_  
d1jnaya3 d2rmka\_ d1f6ba\_ d1f60a3 d1gota2 d1jala1 d2fh5b1 d1g16a\_  
d2wblc\_ d1m7ba\_ d1wf3a1 d1f5na2 d1t9ha2 d1z6xa1 d1z0aa1 d2fg5a1

d2a5ja1 d2bcjq2 d1s0ua3 d1ky3a\_ d4y0va\_ d4lhwa\_ d2qmea1 d2atxa1  
d1legaa1 d1ryha\_ d1moza\_ d1nrjb\_ d2erya1 d3bfka\_ d1puia\_ d1fzqa\_  
d3j3az1 d3t5ga\_ d1shza2 d3defa\_ d2f7sa1 d3raba\_ d3tsoa\_ d3aq4a\_  
d2a17a1 d3sfva1 d3bc1a\_ d2ncda\_ d1sdma\_ d3h4sa1 d2heha\_ d2grya\_  
g3kin.1 d1kk8a2 d1br2a2 d1goja\_ d2mysa2 d1lkxa\_ d3t0qa\_ d4db1a1  
d3gbja\_ d1ry6a\_ d1v8ka\_ d1k8ka2 d1k8ka1 d3uleb1 d3i33a2 d3i33a1  
d1dkgd2 d1dkgd1 d4ci6a2 d1jcf1a1 d4a2ba2 d2fxua1 d1yaga2 d1yaga1  
d4cbua2 d1bupa2 d3vrda1 d3vrda2 d1fcdc2 d1fcdc1 d1h1oa2 d1m70a2  
d1m70a1 d1lig8a1 d1czan2 d1czan3 d1czan1 d1lig8a2 d1czan4 d1bg3a4  
d1bg3a3 d1bg3a1 d3h1jd1 d2d0oa3 d2d0oa2 d1nbwa2 d1js9c\_ d1f15b\_  
d1za7a\_ d1laja\_ d4zzva\_ d2xspa\_ d1leg1a\_ d4v20a\_ d4ipma1 d1gpia\_  
d4csia\_ d3pfza\_ d3ovwa\_ d2yoka\_ d2nqya\_ d1h4ga\_ d1hixa\_ d1oa2a\_  
d1olra\_ d3b7ma\_ d4h7ma1 d3wp3a\_ d2vgda\_ d1ligoa\_ d3zsea\_ d2nlra\_  
d3wx5a\_ d1oa3a\_ d1pvxa\_ d1m4wa\_ d1f5ja\_ d1oa4a\_ d1ks5a\_ d4ix1a1  
d1levsa\_ d1cnt1\_ d1pvhb\_ d1z7ca\_ d1huwa\_ d1rhga\_ d1f6fa\_ d1f45b\_  
d1ilrb\_ d1axia\_ d4x51a\_ d1d9ca\_ d4ypgc1 d3oq3a\_ d1lqsl\_ d1n1fa\_  
d1aula\_ d1wu3i\_ d3bes1\_ d3ux9a\_ d3rbaa\_ d2qtra\_ d1nupa\_ d3l92a\_  
d1f9aa\_ d1qjca\_ d2h29a\_ d1vlha\_ d1lw7a1 d1mrza2 d4ruka\_ d2el7a\_  
d1liq0a2 d1irxa2 d1r6ta2 d1ivsa4 d2cyba\_ d1rqga2 d1j09a2 d2yxna\_  
d1f7ua2 d1h3fa1 d1ffya3 d2g36a1 d1nzja\_ d1jila\_ d1n3la\_ d1pfva2  
d1h3na3 d3n9ia\_ d3sz3a1 d1cwva5 d3sw2a\_ d1moxc\_ d1dx5i3 d1edmb\_  
d1aut12 d1aut11 d1nqlb\_ d1dva11 d1szba2 d1kigl\_ d2y5fl\_ d1ijqa2  
d1gk5a\_ d1g1sa2 d1nt0a3 d1xdtr\_ d1lmja2 d1lmja1 d1nzia2 d2wphe\_  
d1klil\_ d1pfx12 d1pfx11 d1p9ja\_ d1g1ta2 d1f7ea\_ d4yzub\_ d1lr7a1  
d2mgpa1 d1b9wa1 d1b9wa2 d2mgpa2 d1ob1c1 d1n1ia2 d1n1ia1 d2npra2  
d2npra1 d1g14a2 d2y5ia\_ d1qlsa\_ d1psra\_ d3n22a\_ d2egda\_ d4ggfc\_  
d2wcea\_ d2luca\_ d4aqia\_ d3nsia\_ d2lp3a\_ d1j55a\_ d1a4pa\_ d1k8ua\_  
d1nsha\_ d1pvaa\_ d3fs7a\_ d2pvba\_ d1ttxa\_ d1rwya\_ d2kyfa\_ d1rk9a\_  
d1a75a\_ d1tiza1 d1nyaa\_ d1g8ia\_ d1ggwa\_ d1wdcc\_ d3fwba\_ d1ggza\_  
d2o5ga\_ d1ctaa\_ d1m45a\_ d3i5gc\_ d1s18a\_ d1fpwa\_ d2scpa\_ d2roaa\_  
d4aqra\_ d3pn7b\_ d1br1b\_ d2mysb\_ d1s6ca\_ d1bjfa\_ d2obha\_ d1jfka\_  
d1jf0a\_ d1qv0a\_ d1lkja\_ d2mlfc\_ d2m97a\_ d2d8na\_ d4by5a\_ d1jbaa\_  
d4nqga\_ d1wdcb\_ d2mysc\_ d1j7qa\_ d1s6ia\_ d1uhka2 d1r2ua\_ d1dtla\_  
d3kf9a\_ d3pn7c\_ d1gjya\_ d1y1xa\_ d1hqva\_ d1dvia\_ d1df0a1 d1qxp2a  
d4us1a\_ d1k94a\_ d1sfsa\_ d1wkya2 d1uuqa\_ d3wh9a\_ d4m1ra\_ d1xyza\_  
d4xuya\_ d2je8a5 d4bf7a1 d3cuia\_ d1ur4a\_ d1qw9a2 d1lodza\_ d2vzsa5  
d1bqca\_ d2x2ya1 d1hjqa\_ d1qnra\_ d4y7ea1 d1vjza\_ d4k68a\_ d2v3ga\_  
d4hpga\_ d1nofa2 d1h4pa\_ d1aq0a\_ d3ziza\_ d4bs0a\_ d1ecea\_ d1h1na\_  
d1ta3b\_ d1w91a2 d1ilwa\_ d1uhva2 d1us3a2 d1legza\_ d7a3ha\_ d1tvna1  
d3nyda1 d1ghsa\_ d2cyga1 d4xv0a\_ d2c8na2 d1w32a\_ d3emca\_ d1v6ya1  
d1foba\_ d2uwfa1 d2fgla\_ d3niya1 d2c0ha1 d1rh9a1 d1yq2a5 d1szna2  
d1fa2a\_ d1pama4 d5do8a1 d1ea9c3 d2fhfa5 d1qhoa4 d1avaa2 d1m53a2  
d4m8ua1 d2gjpa2 d1lwha2 d4howa1 d1ktba2 d1j0ha3 d3vm5a1 d2x1ia\_  
d1wzaa2 d1uasa2 d2diea1 d1mxga2 d1ht6a2 d1eswa\_ d1iv8a2 d5cpsa\_

d1ud2a2 d1zjaa1 d3gbea1 d1kwga2 d1wdpa\_ d1gcya2 d1g5aa2 d1hvxa2  
d3dhpaa2 d2bhua3 d4do4a1 d3qgva1 d1e43a2 d1g94a2 d2d3na2 d1gjwa2  
d1gvia3 d1x1na1 d1r7aa2 d1tz7a1 d3c8da2 d2pbla1 d1jjia\_ d1lzla\_  
d1jjfa\_ d4c7ga2 d2gjxa1 d1nowa1 d1jaka1 d1yhta1 d4toqa\_ d1wb0a1  
d1w9pa1 d1itxa1 d1kfwa1 d1goia2 d1edqa2 d2gsja\_ d1hjxa1 d1jnda1  
d1vf8a1 d3wdpp1 d3wq5a\_ d1gnxa\_ d4gxpa\_ d4hz8a\_ d1e4mm\_ d3aiua\_  
d1wcca1 d1qvba\_ d3ahxa\_ d1v02a\_ d2dgaa\_ d1pbga\_ d1vffa1 d1qoxa\_  
d4ha4a\_ d1mixa2 d1e5wa2 d1j19a2 d1isna2 d2a16b2 d3syxa1 d1mkea1  
d2p8va\_ d1xoda1 d1i7aa\_ d1evha\_ d1legxa\_ d1x14a1 d1n9pa\_ d3vsqa\_  
d2gixa1 d1iuka\_ d2csua1 d3q9ub\_ d2yv1a1 d3q9na\_ d2d59a\_ d1oi7a1  
d2yv2a1 d1y81a1 d1wgqa1 d1v89a1 d2coda1 d1zc3b\_ d1wg7a1 d1u5ea1  
d1v61a1 d2coca1 d2ys1a1 d1v5pa1 d1ntya2 d1wjma1 d1wila1 d1u29a\_  
d1xx0a1 d1unqa\_ d2zkmx3 d1v88a1 d2adza1 d1x1fa1 d1p6sa\_ d2coaa1  
d1btka\_ d1v5ma1 d1faoa\_ d2x18a\_ d1dyna\_ d1x1ga1 d4kaxb\_ d2j59m1  
d1ki1b2 d1xcga2 d1txda2 d1u5da1 d1dbha2 d1wlha\_ d1upqa\_ d1v5ua1  
d1foea2 d2fj1a1 d1eaza\_ d2dfka2 d2cofa1 d1kz7a2 d1d4ua2 d9ldta1  
d2ewda3 d1up7a1 d2dfda1 d1s6ya1 d1vjta1 d7mdha1 d1hyea1 d1t2da1  
d1ojsa3 d1b8pa1 d1ldna1 d1hyha1 d1civa1 d2a92a1 d1i0za1 d1y6ja1  
d1gv0a1 d1ur5a1 d1l1da1 d1obba1 d1npya1 d3t4ea2 d1a4ia1 d1o0sa1  
d2hk9a2 d2egga2 d1b26a1 d1bvua1 d1gq2a1 d1c1da1 d1leha1 d1gtma1  
d1euzal d1nvtal d3dona2 d1edza1 d1gpja2 d1vi2a1 d1p77a1 d1nyta1  
d1v16a1 d1v91a1 d1txga2 d3f47a1 d1mv8a2 d2pv7a2 d1xc2a3 d2ahra2  
d4xiya1 d2f1ka2 d1i36a2 d1np3a2 d1l1j8a4 d1teaa3 d1qmgaa2 d2i76a2  
d2g5ca2 d1wdka3 d1dlja2 d3cuma3 d1kola2 d1f8fa2 d1qora2 d1jqba2  
d1vj0a2 d1cdoa2 d1gu7a2 d1d1ta2 d1xa0a2 d2dm6a2 d1jvba2 d1rjwa2  
d1llua2 d1h2ba2 d1tt7a2 d1piwa2 d1o89a2 d1iz0a2 d1yb5a2 d1uufa2  
d1vj1a2 d1e3ia2 d3gpdg1 d1vc2a1 d2nvwal d1u8fo1 d1ydwal d1hdgo1  
d2g17a1 d1cf2o1 d2czca2 d1r0ka2 d1obfo1 d2cvoa1 d1ebfa1 d1h6da1  
d1i32a1 d1zh8a1 d2q49a1 d1qkia1 d1j5pa4 d3pzra1 d1xeea1 d1vkoa1  
d1vm6a3 d3qvsa1 d2pkqo1 d1b7go1 d1gr0a1 d1p1ja1 d1lc0a1 d1j0xo1  
d3pwka1 d2hjsa1 d1zyao1 d1vkna1 d1t1ta1 d1nvmbl d3sjua\_ d3ojfa1  
d1xu9a1 d2jjya1 d1n7ha\_ d1y1pa1 d1h5qa\_ d1jtva\_ d4fs3a\_ d2bkaa1  
d1gy8a\_ d2c5aa1 d1ulsa\_ d1ooea\_ d2b69a1 d1y5ma1 d1spxa\_ d1ae1a\_  
d1ydea1 d1gega\_ d1hdoa\_ d1o5ia\_ d1e6ua\_ d1snya1 d2rhca\_ d3zv4a\_  
d5ceja\_ d2d1ya1 d1fjha\_ d3w8ea\_ d2fmua1 d1x1ta\_ d1rpna\_ d3ay7a1  
d1k2wa\_ d1eq2a\_ d2hrba1 d3ruaa\_ d2ew8a1 d4hwka\_ d1xgka\_ d2bd0a1  
d1yo6a1 d2a35a1 d2ntva\_ d1v18a\_ d1hdca\_ d4bkua\_ d2ag5a1 d2q45a\_  
d1nffa\_ d4iy1a\_ d1zbqa1 d1kewa\_ d1ek6a\_ d1ja9a\_ d2q46a2 d1iy8a\_  
d1cyda\_ d2ptga\_ d1hxha\_ d1uzma1 d3lyla\_ d4m89a\_ d3wyea\_ d2b11a1  
d1w6ua\_ d1sb8a\_ d2q2va\_ d4nr0a\_ d1e6wa\_ d2gasa\_ d3oiga1 d2bgka1  
d1mxha\_ d1v10a1 d1rkxa\_ d1r6da\_ d1wmaa1 d1e7wa\_ d2c07a1 d1xkqa\_  
d3tzha\_ d1g0oa\_ d3l26a\_ d1qyca\_ d1ledoa\_ d1gz6a\_ d1loc2a\_ d1t2aa\_  
d1zema1 d2xoxa\_ d1z45a2 d1geea\_ d1p33a\_ d3lt0a\_ d4e6pa\_ d2wyua\_  
d1db3a\_ d4q9na\_ d1xhla\_ d4o1ma\_ d1fmca\_ d2uvda\_ d2gdza1 d1uaya\_

d2z1ma\_ d2o23a2 d2fr1a2 d2fr1a1 dlqsga\_ dlqyda\_ d4zjua\_ d2a4ka1  
d1yb1a\_ d1wvga1 d1yxma1 d3f4ba\_ d1mg5a\_ d1xg5a1 d1c11a\_ d41bqa\_  
d1a78a\_ d1slta\_ d4no4a\_ d3zsja\_ d3duia\_ d1g86a\_ d1is3a\_ d1hlca\_  
d3nqyb\_ d4gera\_ d1bqba\_ d1mdwa\_ d1ziva1 d1zcmal d3ioqa\_ d1fh0a\_  
d1o0ea\_ d1khqa\_ d1m6da\_ d2cb5a\_ g8pch.1 d1s4va\_ d2pnsa\_ d1vsna1  
d1mira\_ d1iwda\_ d2oula\_ d7pcka\_ d3bwka\_ d3bcna\_ d2p86a\_ d1pvja\_  
d1pcia\_ d1gece\_ d1deua\_ d4bs6a\_ d1xkga1 d1cqda\_ d1jqpa2 d2c0ya\_  
d2bdza\_ d3p5ua\_ d2o36a\_ d1k9xa\_ d2jk6a2 d2jk6a1 d1fecal d1fecal2  
d1lpfa1 d1lpfa2 d1xhca1 d1xhca2 d1dxla2 d1dxla1 d1gera2 d1m6ia2  
d1onfa1 d1onfa2 d3lada2 d3lada1 d1w4xa1 d1w4xa2 d1gesa2 d1mo9a1  
d1xdia1 d1fl2a2 d1fl2a1 d1fcda1 d1fcda2 d1h6va2 d1h6va1 d1mo9a2  
d1gv4a2 d1gv4a1 d2gv8a2 d2gv8a1 d1aoga1 d1aoga2 d1hyua1 d1ebda1  
d1ebda2 d3dk9a1 d1q1ra2 d1q1ra1 d1gesa1 d1zbfa1 d2z1ha\_ d2etja1  
d3qioa1 d1j11a\_ d2e41a\_ d1j12a\_ d21sna1 d1io2a\_ d1uaxa\_ d2yv0x\_  
d1mu2a1 d1lekea\_ d1i39a\_ d1s5ja1 d2hbja2 d2igia\_ d1wlja\_ d1qhta1  
d4dlea1 d1tgoal d2f96a1 d3tr8a1 d3mxma\_ d1q8ia1 d1y97a1 d1w0ha\_  
d1kfsa1 d2py5a1 d1noya\_ d1d5aa1 d1yt3a3 d2guia\_ d3mwpal d4kb1a\_  
d2y8ga\_ d1xkea1 d2y8fa\_ d1iv0a\_ d1b9ra\_ d1offa\_ d1frra\_ d3wcqa\_  
d1e9ma\_ d1wria\_ d1i7ha\_ d3av8a\_ d1czpa\_ d1rfka\_ d3p1ma1 d3b2ga\_  
d2bt6a2 d1id1a\_ d2hmta\_ d3nvva1 d1krha3 d2h88b1 d1n62a2 d1t3qa2  
d1kf6b2 d1zoyb1 d1jq4a\_ d1ffva2 d1dgja2 d1rm6c2 d2w0pa\_ d2diaa1  
d2e9ia2 d2e9ja1 d2dj4a1 d2eeba1 d2diba1 d2dmba1 d2dmca1 d2d7oa1  
d2ee6a1 d2d7pa1 d2eeaa1 d2di8a1 d1wlha1 d2d7na1 d2nqca\_ d2d7ma1  
d2dica1 d3cnka\_ d2k3ta1 d2eeca1 d1qfha1 d2bp3a1 d1v05a\_ d2ee9a1  
d2eeda1 d2di9a1 d1kx5b\_ d3a6na\_ d4m6ba2 d2nqbd\_ d3wkjd\_ d2yfwe\_  
d4h9na\_ d5bnxa\_ d1kx5c\_ d3r45a\_ d1eqzb\_ d4jjnb\_ d1f66c\_ d1eqza\_  
d4wnnb\_ d1kx5a\_ d1u35c1 d1id3a\_ d2nqbc\_ d1kx5d\_ d1tafa\_ d1bh9b\_  
d1tafb\_ d1jfib\_ d1h3ob\_ d2byka1 d1n1ja\_ d4g92b\_ d1bh9a\_ d1jfia\_  
d1h3oa\_ d2bykb1 d1n1jb\_ g1f8v.1 d1novc\_ d2bbvc\_ d4ilya\_ d1chka\_  
d4olta\_ d1sefa\_ d1sfna\_ d1rc6a\_ d1qqya\_ d1gd6a\_ d1f6ra\_ d1livma\_  
d2gv0a\_ d1iiza\_ d2z2fa\_ d1j8xa\_ d1ghla\_ d1b9oa\_ d1741a\_ d1691a\_  
d2o4wa\_ d1p37a\_ d1k28a3 d1xjta1 d1jtma\_ d2f2qa\_ d4e97a1 d2za0a\_  
d2c21a1 d2pjsa1 d2i7ra1 d1lecsa\_ d1xqaa1 d5cj3a1 d1npba\_ d1jifa\_  
d2p7oa\_ d1r9ca\_ d1nkia\_ d1mpya2 d1kw3b2 d1kw3b1 d4ghga1 d1tfza1  
d3isqa1 d3isqa2 d1sqia1 d1sqia2 d1lkda2 d1lkda1 d1mpya1 d1cjxa1  
d1sp9b2 d1t47a1 d1t47a2 d1flua2 d1sp8a1 d1sp8a2 d1flua1 d1w5qa\_  
d2c1ha\_ d1ohla\_ d1l6sa\_ d1qsta\_ d2beia1 d4m3sa\_ d1u6ma1 d1ygha\_  
d1yk3a1 d3dr6a\_ d1xmta\_ d1z4ea1 d2ge3a1 d1bo4a\_ d2fiaa1 d2jdca1  
d1y9wa1 d3to7a\_ d1wwza1 d2fl4a1 d2ozua1 d2b5ga\_ d2cy2a1 d2p0wa\_  
d1cm0a\_ d4pswa\_ d1yrea1 d1yr0a1 d1m4ia\_ d2gana1 d1yvka1 d1ghea\_  
d2g3aa1 d1y7ra1 d2euia1 d1q2ya\_ d2fsra1 d1xeba\_ d2ae6a1 d1cjwa\_  
d1qsma\_ d2aj6a1 d1y9ka1 d1i12a\_ d1vkca\_ d2atra1 d1n71a\_ d2d4pa1  
d2fiwa1 d2fe7a1 d1tiqa1 d2ou2a\_ d1yx0a1 d2fcka1 d1p0ha\_ d2j8ma\_  
d2pq8a\_ d1z4ra1 d1s3za1 d2m5ta\_ d1wqsa\_ d5bpea\_ d2ipha\_ d1lvoa\_

d2bhga1 d3tnta\_ d3sjia\_ d3d23a1 d2fyqa\_ d3tloa\_ d3zvea1 d2hrva\_  
d3q3ya1 d4asha1 d2phla2 d2phla1 d1fxza2 d1fxza1 d1lrha\_ dluija1  
g1dgw.1 d2v09a\_ d1uika2 d1uika1 d1dgwa\_ d4mh8a\_ d1mu2a2 d4i7ga1  
d1bbua1 d1e1oa1 d1c0aa1 d1b8aa1 d1l0wa1 d3a74a1 d1eova1 d4l3wa\_  
d1llfa\_ d1gz7a\_ d1ukca\_ d1cr6a2 d1ra6a\_ d1muka\_ d3gsza\_ d1khva\_  
d1te9a\_ d2xwha\_ d3uqsa\_ d3hkwa\_ d3n6ma\_ d2cjqa\_ d2xyma\_ d1teba\_  
d1te8a\_ d1s48a\_ d1u09a1 d4wfxa\_ d3tyqa\_ d2pgga1 d3zxha\_ d1cgl\_a\_  
d1rm8a\_ d1eaka2 d1hy7a\_ d2jsda\_ d1cxva\_ d1hv5a\_ d1i76a\_ d3p0ya1  
d1igra1 d1n8yc2 d1n8yc1 d1m6ba2 d1m6ba1 d1m4la\_ d2bk7a\_ d3fjua\_  
d1z5ra1 d1kwma1 d1uwya2 d1jqga1 d2c1ca1 d1dtda\_ d1h8la2 d1h6ua2  
d1i26a\_ d1cixa\_ d1y29a\_ d1v7fa\_ d2jtba\_ d1d1ha\_ d1g9pa\_ d1lupa\_  
d1qk7a\_ d1mb6a\_ d2a2va\_ d1niya\_ d1i25a\_ d1hvwa\_ d2mpqa\_ d1ie6a\_  
d1kqha\_ d1la4a\_ d2mxoa1 d1d10a\_ d1koza\_ d1qk6a\_ d1emxa\_ d1lqra\_  
d1c6wa\_ d1rmka\_ d1eyoa\_ d1cnna\_ d1fu3a\_ d1g1pa\_ d1f3ka\_ d1fyga\_  
d1rypd\_ d1irua\_ d1rypc\_ d3unfk\_ d1rypa\_ d1j2pa\_ d1irui\_ d1j2qh\_  
d3unfh\_ d1m4ya\_ d1rypb\_ d1lirul\_ d1lirug\_ d1liru2\_ d1q5rh\_ d1rypg\_  
d1g3ka\_ d1liruf\_ d1q5qa\_ d1e94a\_ d1lirub\_ d1ryph\_ d3ty6a\_ d1liruj\_  
d1liruk\_ d1rype\_ d1lirud\_ d1lirue\_ d3mi01\_ d1rypf\_ d2z3ba\_ d1liruc\_  
d3mka2\_ d1lirul\_ d1ny721 d1a6ca3 d1a6ca2 d1a6ca1 d1pgl22 d1pgl21  
d1pgl11 d1ny711 d1mqta\_ d1d4m3\_ d1fmd3\_ d2mev1\_ glaym.1 d1evl3\_  
d4q4w1\_ d1r1a3\_ d2x5ia\_ d1rhi1\_ g1r1a.1 g1d4m.1 g1rhi.1 d1b35b\_  
d1loopa\_ d1tme1\_ d4iv1a\_ g1pvc.1 g1fpn.1 d1fpn1\_ d4gb31\_ d1d4m1\_  
d1fmd1\_ d1evl1\_ d2wzr3\_ g1cov.1 d1qqp3\_ g1fmd.1 d2x5ic\_ d1rhi3\_  
g1oop.1 d1hxs1\_ d1fpn3\_ d1bev1\_ g2mev.1 d1eah3\_ d1aym1\_ d1pvc3\_  
d1qqp1\_ d1zba3\_ d1h8ta\_ d3vbhc\_ g1b35.1 g1bev.1 d1hxs3\_ g1evl.1  
d1bev3\_ g1tmf.1 d1tmf1\_ d1b35a\_ d2mev3\_ g1eah.1 g1h8t.1 d1eah1\_  
d4q4w3\_ d1r1a1\_ d1aym3\_ d1pvc1\_ d1zba1\_ d1h8tc\_ d1loopc\_ d1tme3\_  
g1qqp.1 d4iv1c\_ g1tme.1 d1y14b1 d2nn6i1 d1i941\_ d2zjra2 d1smxa\_  
d2qamc2 d2r7da1 d1r12a2 d1wfga1 d3bzka4 d1x6oa2 d3a0ja\_ d2j01d2  
d2ja9a1 d4q15a\_ d1hr0w\_ d1luza\_ d2n3sa\_ d2vnud1 d1h95a\_ d1go3e1  
d2nn6h1 d1ne3a\_ d2mola\_ d1liz6a2 d1jjga\_ d1e3pa2 d2ix0a3 d2ix0a2  
d2lxja\_ d1ueba3 d1ueba2 d2z0sa1 d1u0la1 d2ix0a1 d2eifa2 d2je6i1  
d3i2za1 d2c35b1 d2ahob2 d1t9ha1 d3i4oa\_ d2qall1 d1jt8a\_ d2nn6g1  
d1g6pa\_ d3cama\_ d1i94q\_ d1c9oa\_ d1d7qa\_ d2ba0a1 d2vnud2 d2vnud3  
d1khia2 d2qalq1 d1wi5a1 d1xtda2 d1ny4a\_ d4w9ta\_ d1jvna1 d4x2ra1  
d1ka9f\_ d4axka1 d1thfd\_ d1h5ya\_ d4u28a\_ d2y88a\_ d4wd0a\_ d1vzwa1  
d3ia2a\_ d4dgqa1 d1hkha\_ d1zoia\_ d4lt9a1 d3tc7a1 d3hoja\_ d3vnda\_  
d3n18a1 d1geqa\_ d3naval d1v5xa\_ d4a2ra1 d3tc6a1 d1ujpa\_ d4ijba\_  
d1xcfa\_ d1vc4a\_ d1rd5a\_ d1qopa\_ d3b5va\_ d2r80b\_ d1cqxa1 d1cg5a\_  
d1gcvb\_ d3boma\_ d2h8fb\_ d2raoa\_ d3bj1a\_ d4hrrb\_ d2r50a\_ d3d1kb\_  
d2aalb1 d3zhwa\_ d3hf4b\_ d3gdja\_ d1jebb\_ d3bj1b\_ d1x9fb\_ d1wmub\_  
d1gcva\_ d3bcqb\_ d3d4xb\_ d1gvha1 d2dc3a\_ d3hf4a\_ d4yu3a\_ d3k8ba\_  
d1qpwb\_ d2r80a\_ d3bcqa\_ d1v4wa\_ d3wtgb\_ d1j17a\_ d4esaa\_ d1a9we\_  
d3d1ab\_ d1fsla\_ d4h2la\_ d1v4wb\_ d1mwca\_ d1vhba\_ d1jeba\_ d1spgb\_

d1h97a\_ d1q1fa\_ d1tu9a1 d3d1aa\_ d1hdsb\_ d3hyub\_ d2zffb\_ d3fs4a\_  
d1oj6a\_ d1shrb\_ d4h2lb\_ d4yu3b\_ d1spga\_ d3hrwa\_ d3qqra\_ d3at5a\_  
d4wchd\_ d3hyua\_ d1cg5b\_ d1uc3a\_ d1hbra\_ d2raob\_ d1outb\_ d4esab\_  
d3gdjb\_ d3qqqa\_ d1x9fc\_ d3vrfa\_ d1litha\_ d3mkba\_ d3d4xa\_ d3mjpa\_  
d1jl6a\_ d3fh9a\_ d1outa\_ d2dc3b\_ d1lit2a\_ d3eoka\_ d3g46a\_ d1qpwa\_  
d3vrfb\_ d1x9fd\_ d1hdsa\_ d2zfba\_ d3mkbb\_ d1or4a\_ d3wtga\_ d1a4fa\_  
d3fh9b\_ d3bomb\_ d3cy5a\_ d3at5b\_ d1x9fa\_ d2oifa\_ d4lmbx\_ d1cpcb\_  
d3v57a\_ d1kn1a\_ d1cpca\_ d4f0ta\_ d2vjha\_ d4po5b\_ d1eyxa\_ d1alla\_  
d4f0tb\_ d1b33b\_ d1b8db\_ d4h0mb\_ d1b33a\_ d2vjhb\_ d4l6b\_ d2vmlb\_  
d1allb\_ d2vjta\_ d3dbja\_ d2vmla\_ d2vjtb\_ d4f0ub\_ d1f99b\_ d4rmpa1  
d1liaa\_ d2uulb\_ d4lmsb\_ d4f0ua\_ d2bv8a\_ d1f99a\_ d2bv8b\_ d2c7lb\_  
d3dbjb\_ d4rmpb1 d1b8da\_ d4h0ma\_ d3v57b\_ d1kn1b\_ d1liab\_ d2uula\_  
d2j96a\_ d1mtza\_ d2xqfa\_ d1ea5a\_ d1f6wa\_ d1dx4a\_ d1k4ya\_ d4qwwa\_  
d2ha2a\_ d1r88a\_ d1sfra\_ d1f0na\_ d4qeka\_ d1rpma\_ d2shpa1 d1yfoa\_  
d118ka\_ d2ooqa1 d1g4us2 d1p15a\_ d1lara2 d1lara1 d1wcha\_ d2fh7a2  
d2fh7a1 d1g19b1 d1gkub2 d1hroa\_ d4gedb\_ d3zooa\_ d1mz4a\_ d1gu2a\_  
d1f1fa\_ d1dvva\_ d1c6ra\_ d1c75a\_ d1e29a\_ d1gdva\_ d1cnoa\_ d1h32b\_  
d2bh4x\_ d2aiua\_ d5cytr\_ d1jdl\_ d1i8oa\_ d2zboa\_ d3dmia\_ d1ls9a\_  
d1wvec\_ d2yk3a\_ d3ph2b\_ d1dw0a\_ d5aura\_ d1q13a\_ d1qn2a\_ d1f1ca\_  
d1jmx4 d1jmx3 d1pbya4 d1xm5a\_ d1xaxa\_ d1tvia\_ d1s5ja2 d1qhta2  
d4dlea2 d1tgoa2 d3py8a2 d1q8ia2 d2py5a2 d1d5aa2 d1f74a\_ d3l21a\_  
d2e1da\_ d1to3a1 d1w3ia\_ d1sfla\_ d1n7ka\_ d1vcva1 d4imea\_ d1wa3a\_  
d2ocza1 d1f2ja\_ d3m16a\_ d2yxga\_ d1ub3a\_ d3a5fa\_ d1fbaa\_ d1l6wa\_  
d1xfba1 d1wx0a1 d1vpxa1 d1ojxa\_ d1mxsa\_ d2a4aa1 d1xkya1 d3cq0a1  
d3s1xa\_ d1f05a\_ d1fdja\_ d3cpa1 d4d2ja\_ d1e88a1 d1l6ja4 d1eaka4  
d1eaka3 d1l6ja3 d1h8pa2 d1h8pa1 d3rp2a\_ glucy.1 d1fuja\_ d2zchp\_  
d3w94a\_ d1si5h\_ d1lo6a\_ g2pka.1 d1cgha\_ d1kigh\_ d1a5ia\_ d3s9ba\_  
d1hj8a\_ d1ao5a\_ d2anya\_ d1q3xa1 d1gvza\_ d1azza\_ d4gsoa\_ d2f91a1  
d1iaua\_ d1gdna\_ d1eufa\_ g1fiw.1 d1eq9a\_ d4nfea\_ d2rdla\_ d1spja\_  
d1elva1 d1a7sa\_ d1ekbb\_ d1pfxc\_ d1yc0a\_ d2aiqa\_ g1fiz.1 d1fi8a\_  
d4k60a\_ d4dgja\_ d1mzaa\_ d1op0a\_ d3tjva\_ d1pytd\_ d1sgfg\_ g1gg6.1  
d2eeka\_ g1rtf.1 d1a0ja\_ d3g01a\_ d1pytc\_ d4e7na\_ d1ddja\_ d1z8ga1  
d2hlca\_ d1npma\_ d1brup\_ g1jou.1 d1sgfa\_ d1autc\_ g2hnt.1 g1kdq.1  
d1orfa\_ d3s69a\_ d4crga\_ d1fxya\_ d2ftba\_ d1pmpa\_ d2rcqa1 d4lkpa\_  
d1sa8a\_ d1vyfa\_ d1lpja\_ d3vg7a1 d4azqa1 d1o8va\_ d5bvqa\_ d1p6pa\_  
d2qo4a\_ d1opba\_ d1yiva1 d1olva\_ d4bvma1 d4tkba\_ d4i3ba\_ d1bwya\_  
d1ftpa\_ d1ggla\_ d4gkca\_ d1cbia\_ d3p6da1 d1kqwa\_ d2a0aa1 d1jx4a2  
d3gv5b1 d1t94a2 d3bq0a2 d3lgia\_ d3i77a\_ d2z9ia2 d4nsva\_ d1lcya2  
d4jcna\_ d1agja\_ d1os8a\_ d1hpga\_ d1p3ca\_ d1l1ja\_ d1e69a\_ d1mv5a\_  
d3g60a4 g1ii8.1 d1ewqa2 d1ji0a\_ d1qhla\_ d1v43a3 d2wmfa1 d1vpla\_  
d1g2912 d4a82a2 g1f2t.1 d2d62a1 d3tuic1 d2bbsa1 d3g60a3 d2ixea\_  
d1g6ha\_ d1sgwa1 d2qi9c\_ d3rlfa1 d3b60a1 d3d31a2 d2pzea1 g1xew.1  
d1jj7a\_ d2onka1 d1wlwa\_ d1iwea\_ d1qf5a\_ d1vmaa2 d1nija1 d1np6a\_  
d2p67a1 d3ihla\_ d1okkd2 d1s1ma2 d1liona\_ d2v40a\_ d1dj3a\_ d3hida\_

d2vo1a1 d2g0ta1 d1vcoa2 d1j8mf2 d1g3qa\_ d1xjca\_ d1p9ba\_ d1qzxa3  
d1ihua2 d1ihua1 d2qm8a\_ d1dj2a\_ d4ioja\_ d1cp2a\_ d1yrba2 d1hyqa\_  
d3gqba2 d1skye3 d1xp8a1 d1tf7a2 d1tf7a1 d1ye8a1 d1skyb3 d2qe7d2  
d4blta\_ d4huta\_ d3l1daa2 d4hyya\_ d2i3ba1 d1cr1a\_ d3j9tb2 d3ntua2  
d1vdza1 d2z43a\_ d1e9ra\_ d1nlfa\_ d3ziaa2 d1n0wa\_ d1g6oa\_ d3ziad2  
d3j9ta2 d1pzna2 d3gqbb2 d2i49a\_ d1nnfa\_ d1xvxa\_ d1lursa\_ d1h3da1  
d1iuda\_ d4m1va1 d1twya\_ d3e13x\_ d2nxoa1 d4pfua\_ d3ttma\_ d1elja\_  
d2qmw1a1 d1us5a\_ d1y3na1 d1jeta\_ d1uqwa\_ d4f19a1 d2esna2 d3thia\_  
d3fasa1 d2uyeb\_ d2xwva1 d1r9la\_ d2fyia1 d1pb7a\_ d2ozza1 d1sw5a\_  
d1nh8a1 d1vr5a1 d2g29a\_ d1xs5a\_ d3lswa\_ d2z23a\_ d3w9va\_ d3tcha\_  
d1q35a\_ d1z7me1 d3q27a\_ d1p99a\_ d1ve4a1 d2i6ea1 d4mcoa1 d4n8ya\_  
d1eu8a\_ d1zbma1 d1ixca2 d1j1na\_ d1xvya\_ d1y9ua\_ d2z22a1 d1xoca1  
d4oera\_ d1wdna\_ d5f1qa1 d1xt8a1 d1i6aa\_ d4gwoa\_ d4igta1 d1pc3a\_  
d4mmpa1 d1o63a\_ d2cz1a1 d2onsa2 d4mija1 d4ok5a1 d2bmfa1 d2bmfa2  
d1yksa1 d1yksa2 d1jr6a\_ d2qeqa1 d2j1qa1 d1a1va2 d1eh3a\_ d3skpa\_  
d1dtza1 d1dtza2 d1ieja\_ d1jnfa2 d1ce2a1 d1jnfa1 d1b1xa2 d1b1xa1  
d1jw1a1 d1jw1a2 d1ryoa\_ d1h76a1 d1h76a2 d1c4oa1 d2p6ra3 d2p6ra4  
d1oywa2 d1oywa3 d1wrba1 d1w36b2 d1w36b1 d1c4oa2 d3bora\_ d1t6na\_  
d2eyqa5 d2eyqa3 d2eyqa2 d2zu6a2 d1veca\_ d1uaaa1 d1w36d1 d2g9na1  
d1z3ix2 d2rb4a\_ d1hv8a1 d1hv8a2 d1t5ia\_ d1w36c2 d2j0sa2 d2j0sa1  
d3hjha1 d1z5za1 d1qdea\_ d1z63a1 d1s2ma2 d1s2ma1 d1wp9a1 d1wp9a2  
d1gm5a3 d1gm5a4 d3dina4 d3dina3 d1q0ua\_ d1w36c1 d1z3ix1 d1nkta3  
d1nkta4 d1uaaa2 d1w36d2 g1qhh.1 d2fwra2 d2fwra1 d2v8ta\_ d3q3ma\_  
d1za0a1 d1mxra\_ d2inca\_ d1jk0a\_ d2incb\_ d1mhyb\_ d3hf1b\_ d1mtyb\_  
d1r2fa\_ d2uw1a\_ d3n37a\_ d1afra\_ d1oquc\_ d1syya\_ d1mtyd\_ d2o1za\_  
d1uzra\_ d1smsa\_ d2fkza\_ d1zujal d1s3qa1 d2fjca1 d1z6om1 d1veia\_  
d4dyya\_ d1jiga\_ d3gvya\_ d2pyba\_ d4cy9a1 d3bvfa1 d1r03a\_ d2cf7a\_  
d1nf4a\_ d1zs3a1 d4iwka\_ d3ka8a\_ d3np0x\_ d1n1qa\_ d1lb3a\_ d4e6ka\_  
d1z6oa1 d2fzfa1 d4dyua\_ d3ge4a\_ d1jgca\_ d4am4a\_ d2z6ma\_ d1ji5a\_  
d1vlga\_ d1lkoa1 d1krqa\_ d3qz3a\_ d1o9ra\_ d2ffxj\_ d1euma\_ d1yv1a1  
d2v2pa\_ d1j30a\_ d4di0a\_ d1dpsa\_ d2cbia2 d2choa2 d1l8na1 d1oewa\_  
d2qzxa\_ d2asia\_ d1psoe\_ d1miqa\_ d1smra\_ d2h6ta\_ d1pfza\_ d1lizda\_  
d3hd8a\_ d1j71a\_ d1dpja\_ d4aa9a\_ d1t6ex\_ g1b5f.1 g1lya.1 g1htr.1  
d1qdma2 d1bxoa\_ d1wkra\_ d1tzsa\_ d1libqa\_ d2qzwa\_ d2v76a\_ d1wj1a1  
d1aqca\_ d1qqga2 d1qqga1 d1ntva\_ d1n3ha\_ d4dbba\_ d3f0wa1 d1p3ra\_  
d1wgua1 d2cy4a1 d3hqca\_ d1wvha1 d1xr0b1 d1bdqa\_ d3ggta\_ d3ixoa\_  
d1mrxal d2haha\_ d1tw7a\_ d4njsa\_ d1sgua\_ d2p3da\_ d1nsoa\_ d3d3ta\_  
d2rkfa\_ d1c6ya\_ d2rspa\_ d3ogpa\_ d3ekwa\_ d2o4na\_ d2j9ja\_ d1baia\_  
d3ggua\_ d3lzua\_ d4npua\_ d4j55a\_ d2r8na\_ d2fxda\_ d2p3ca\_ d4dqa\_  
d3ttpa\_ d3t3ca\_ d2p3aa\_ d2hc0a\_ d2fdda\_ d3mwsa\_ d1wgra1 d1ef5a\_  
d1wfyal d1e8ya3 d1wgyal d1l1fda\_ d2cs4a1 d1wxma1 d2byea1 d3kh0a1  
d2byfa1 d1wxaa1 d1e7ua3 d1h4ra3 d4y18a1 d2a16a3 d1wgda1 d1wggal  
d4q5eb\_ d1wjnal d1se9a\_ d3n3kb\_ d1wz0a1 d1we6a1 d2m0xa\_ d2gbka\_  
d3rt3b1 d1wh3a1 d1sifa\_ d2ekek2 d4ii2b1 d4hk2a1 d1c3ta\_ d1m94a\_



d1wgha1 d1ttna1 d1j8ca\_ d1wx8a1 d3v6cb1 d2ma9b\_ d4i61b1 d1bt0a\_  
d2jvca1 d1iyfa\_ d2k1fa\_ d1wxva1 d1wf9a1 d1t0ya\_ d2io0b2 d1xlma1  
d2gbma\_ d1zw7a1 d2m17a\_ d1we7a1 d2lwpa\_ d2gbja\_ d1wjua1 d1v6ea1  
d1v86a1 d4eewa\_ d1wiaa1 d4icva\_ d4gu2a\_ d1wx7a1 d1wy8a1 d4hjka1  
d2faza1 d1v5oa1 d1ps9a2 d1o94a2 d1lqta1 d1cjca1 d1g66a\_ d1qoza\_  
d5ajha1 d3h33a\_ d1rwja\_ d19hca\_ d1os6a\_ d3bxua\_ d3h4na\_ d1i77a\_  
d3caoa\_ d1j0pa\_ d2ctha\_ d1duwa\_ d2e84a\_ d1hh5a\_ d1gyoa\_ d3h34a\_  
d1wioa4 d1ccza2 d1vcaa1 d1dr9a2 d2d9qb1 d2nxyb2 d1um8a\_ d1ixza\_  
d1qvra2 d1qvra3 d1qzma\_ d1sxjc2 d1jr3d2 d2p65a\_ d1l8qa2 d1g8pa\_  
d3hu3a3 d1sxjd2 d1njfa\_ d1in4a2 d1sxja2 d1tuea1 d2ce7a2 d1w5sa2  
d1sxjb2 d1d2na\_ d1ny5a2 d1ofha\_ d2gnoa2 d2a5yb3 d1fnna2 d1u0ja1  
d1lv7a\_ d2fnaa2 d1ixsb2 d4gita\_ d1sxje2 d1g41a\_ d2e3fa\_ d2e3ea\_  
d2llda\_ d2ny8x\_ d2e3ga\_ d2ny9x\_ d2nz3a\_ d2lj7a\_ d1n4na\_ d2m8bb1  
d2kyqa\_ d3psma\_ d1jkza\_ d1jxca\_ d2g11a\_ d1ugla\_ d4uj0a\_ d2k4ua\_  
d1hp2a\_ d2lu9a\_ d1baha\_ d2meoa1 d1wm7a\_ d1hlya\_ d1n8ma\_ d1jlza\_  
d1wpda\_ d1c55a\_ d1pvza\_ d1wt7a\_ d1rjia\_ d1wz5a\_ d1m2sa\_ d1pjva\_  
d1c49a\_ d1qkya\_ d2ktca1 d1wmta\_ d1du9a\_ d1j5ja\_ d1r1ga\_ d1xwdc1  
d3kj4a\_ d1ozna\_ d1w8aa\_ d2ifga3 d1xkua\_ d1t0za\_ d2i61a\_ d1t1ta\_  
d1sn4a\_ d1kv0a\_ d2lkba\_ d1npia\_ d1wwna\_ d1pe4a\_ d2kbka\_ d2li7a\_  
d1djta\_ d2kbha\_ d1dq7a\_ d1sega\_ d1omya\_ d1zywa1 d1jzaa\_ d1bnla\_  
d1bvsa3 d1lixra2 d1iyjb4 d1iyjb5 d1iyjb3 d1o7ia\_ d4ipca1 d1x3ea\_  
d4apva\_ d1jb7a2 d1jb7a3 d3kdfa\_ d1ue1b\_ d1wjja1 d3eiva\_ d1xjva2  
d1xjva1 d2ccza2 d1se8a\_ d1l1oc\_ d1jb7b\_ d1qvca\_ d3ulla\_ d1qzga\_  
d1miua4 d1miua5 d1miua3 d3g48a1 d1gd7a\_ d1mkha\_ d1jjcb3 d1pyba\_  
d3ubub\_ d1legia\_ d1v7pa\_ d1tdqb\_ d3ubua\_ d1c3ab\_ d1h8ua\_ d3bx4b\_  
d1t8ca1 d1sb2a1 d1qdda\_ d2ziba1 d3cada\_ d1byfa\_ d1j34b\_ d1jwia\_  
d1jzna\_ d1c3aa\_ d1oz7b\_ d1wmza\_ d3bdwb\_ d1hq8a\_ d1fifa1 d1dv8a\_  
d3hupa\_ d1wk1a1 d1umra\_ d2afpa\_ d3bx4a\_ d1gz2a\_ d1sl6a\_ d1v7pb\_  
d3g8ka\_ d1ixxa\_ d1j34a\_ d1jwib\_ d1g1sa1 d1y17a1 d1ja3a\_ d1fvub\_  
d3bdwa\_ d1sb2b1 d1fvua\_ d1umrc\_ d1oz7a\_ d4m17a\_ d3cfwa1 d1ypqa1  
d1g1ta1 d3fd4a\_ d3l9jc\_ d4dn8a1 d1v41b\_ d1rd11\_ d2msba\_ d1dgsa2  
d1fvia1 d1ckma1 d1x9na2 d2a1ka\_ d1je5a\_ d1eb6a\_ d3azya\_ d3wvja\_  
d1upsa1 d1ajoa\_ d2hyka\_ d1ajka\_ d2vy0a\_ d3o5sa\_ d3d6ea\_ d3atga\_  
d1dypa\_ d1umza\_ d3i4ia\_ d1tdha3 d1q3ba3 d1ee8a3 d1k82a3 g1qmo.1  
g1len.1 d3zyra\_ d1fnya\_ d1n47a\_ g2ltn.1 d1avba\_ d3usua\_ d1dhkb\_  
d1f9ka\_ d1lukga\_ d1g8wa\_ d1g9fa\_ d1wbfa\_ d3wcsa\_ d1g7ya\_ g1loe.1  
d1mvqa\_ d1hq1a\_ d1v6ia\_ d1dbna\_ d1qnwa\_ d1fx5a\_ d4l8qa\_ d1ioaa\_  
d3n35a\_ d3ubra\_ d1qo8a1 d1d4ca1 d2k3va\_ d1ft5a\_ d1qdba\_ d1m1qa\_  
d2j7aa\_ d1h21a\_ d1ogyb\_ d4fasa\_ d1jnia\_ d1oaha\_ d1sp3a\_ d2h0ba\_  
d2erfa\_ d1h30a2 d1h30a1 d3mw4a1 d2r1ba\_ d3v64a1 d1d2sa\_ d3bopa1  
d3mw3a1 d1okqa1 d1okqa2 d1dszb\_ d1a6ya\_ d3cbba\_ d1ynwa1 d1r4ia\_  
d1hcqa\_ d2hana\_ d2hanb\_ d2enva1 d1kb4b\_ d2n11b\_ d1lo1a\_ d1cita\_  
d1adqa1 d1fnga1 d1uvqb1 d1zs8a1 d2vola1 d2vola2 d1mfb12 d2jelh2  
d1uwe12 d3qq4b1 d1kjvb\_ d1k5na1 d1osph2 d4odh12 d1ow0a1 d1ow0a2

d1bfob2 d3l9ra2 d3jtth1 d2fath2 d4elkb2 d1fn4b2 d2xfxb\_ d1pg7x2  
d1cqka\_ d4k71b2 d1lk2a1 d1eapb2 d4lfhg2 d1i4fa1 d2nw2a2 d1kfah2  
d1mhca1 d1h3ua1 d1wejh2 d1h0db2 d1a5fh2 d1kcvh2 d1mjuh2 d1qqda1  
d1kcrh2 d1k8ia1 d3huja2 d2nnab1 d1nfd2 d3mffb2 d1s9va1 d1lk3h2  
d1q0xl2 d1fv1b1 d1neza1 d4rfeb2 d1r3ha1 d1a6tb2 d1kjva1 d1pz5b2  
d1onqa1 d2bc4a2 d1de4a1 d1k8da1 d1tcra2 d1dn0b2 d1nfd2 d2xwtb2  
d1bfoa2 d1mexh2 d1iakb1 d1ypzf2 d4f7ea2 d1q72l2 d2fbjh2 d1fe8h2  
d1clzh2 d1fngb1 d1uvqa1 d1vgka1 d1c16a1 d4j12a2 d4x99b2 d1igtb3  
d1je6a1 d1q72h2 d1nldh2 d1teth2 d2hmic2 d1ilca2 d1ilca1 d1k8ib1  
d1q0yh2 d1kfa1 d3frua1 d1pg7w2 d1u58a1 d1igyb4 d1igyb3 d1hyrc1  
d1klub1 d1deeb2 d1c12b2 d2bc4b2 d2ig2h2 d1kcvl2 d3wn5b1 d1lk2b\_  
d1lk3l2 d1mjul2 d1sm3h2 d1q0xh2 d1zvsa1 d1ydpal d1u8ib2 d1ypze2  
d1kcu2 d1op9a\_ d1y0la1 d1etzb1 d1legj1 d2gsib1 d1nj9a1 d4jfhdl  
d1aqk1 d1t2ja\_ d1lo4h1 d1zvya1 d3v4v1 d4enec1 d1kxtb\_ d5e8ea1  
d2pxya\_ d4weud\_ d1xiwc\_ d2esvd1 d1qznh\_ d1ogae1 d1f4xh1 d4n1hb\_  
d3ezjb1 d3mlw1 d1kfah1 d1etza1 d1b4jh1 d3cfic\_ d4w68a\_ d2arja1  
d1ek3a\_ d2ok0l1 d1vera\_ d1uwgh1 d1blnb1 d1fpth1 d1rzga1 d2giya1  
d4m3kb1 d1nc2a1 d2nyyd1 d1ncna\_ d1fbih1 d5dxwa\_ d4fqqa1 d1dqdh1  
d1jfq1 d1kelh1 d1faih1 d1frgl1 d1figl1 d4m6n1 d1fo0a\_ d4hxb1  
d3b5ga\_ d3quyd1 d2h9gb1 d1i8kb\_ d2dd8h1 d2ck0h1 d1eaja\_ d4w6wb1  
d2a6ib3 d1t66d1 d2e27h\_ d1ob1b1 d1f11b1 d2v7na1 d1ad0a1 d2xt1b1  
d1pskh1 d4i13b1 d2op4l1 d1a0q1 d1uwell1 d1za3a1 d1ncb1 d4uu9a\_  
d1bm3h1 d1cloh1 d1nqba2 d1cf8h1 d4y5va\_ d1mhph1 d5anma1 d4cdgc1  
d4ldeb\_ d1y0lb1 d2pcpb1 d1z3gl1 d1dfb1 d1fh5h1 d3g5xa1 d1tzib1  
d4dn3l1 d3zhka1 d2b1hh1 d2uyla1 d1f3dh1 d1nj9b1 d2agjh1 d2h1pl1  
d1q72h1 d8fabbl d1ndmb1 d1rjca1 d4u6hb1 d3upca\_ d2fbj1 d1osph1  
d1tvda\_ d2cjh\_ d4fhbd1 d1bd2d1 d1rz7h1 d3nn8a\_ d1blna1 d1knoa1  
d1nfdal d2bmkb1 d1dq1l\_ d1igyb1 d1igfl1 d12e8h1 d3utza1 d1nc2b1  
d1rihh1 d4mwfb1 d4jvpa1 d1mieh1 d1rhfa1 d1fgn1 d1sbsh1 d1lp9e1  
d1dn0a1 d4lqfl1 d1iaih1 d1kgcd1 d1mh5b1 d1gpol1 d2g60h3 d1f8t1  
d2jixd1 d4grwh\_ d1fo0b\_ d1bfob1 d1axsa1 d1u9ka\_ d1nmbh\_ d1h8na1  
d1h8na2 d1jguh1 d4eura1 d3sdy1 d35c8h1 d1w72l1 d1mvub\_ d1i9rh1  
d1ob1a1 d4wenb\_ d1yeeh1 d3ietc1 d1f58h1 d1ad0b1 d1mqkl\_ d1nbvh1  
d4b50a\_ d3r8bb\_ d1baf1 d1mamh1 d4rgne1 d2gsgb\_ d35c8l1 d1bafh1  
d1ailh1 d2pcpa1 d2fath1 d2x1pa\_ d1orsb1 d1libg1 d1shma\_ d1a2yb\_  
d1u0qa\_ d2coqa\_ d1hilb1 d1qfwi\_ d1jv5b\_ d1fn4b1 d5e0qa\_ d1nsnh1  
d1plgl1 d4ocxl1 d1kb5h1 d1rzfh1 d1pg7x1 d2fx7h1 d2oi9c\_ d1l7il1  
d3eyva1 d1d5il1 d4ffyl\_ d1tetl1 d1a6wh\_ d1ac6a\_ d3dvfa\_ d1nfdel  
d1mimh1 d1ri8a1 d1jhlh\_ d3dura\_ d1fskb1 d1f97a1 d3so3b1 d2ak4d1  
d1lp9f1 d4z7wf1 d1l7th1 d4y5ya\_ d4x7ec1 d1emth1 d1ikfl1 d1nlbh1  
d4utal1 d1bjma1 d1eapb1 d1u6ah1 d2dtgd1 d1kj2b\_ d1xeda1 d1cleh1  
d1fgvh\_ d2bnub1 d2fb4h1 d2dtgb1 d1ktrh\_ d1jpth1 d1qkz1 d4hepg\_  
d2atpb1 d1flrh1 d2hrpl1 d1mvfa\_ d1iaim1 d3k80a1 d2jb5h1 d3zkxc\_  
d4grwe\_ d1it9h1 d1rhhb1 d3w9ec\_ d1e4wh1 d1sy6h1 d2j6eh1 d3qxta\_

d1jglh1 d1p7ka1 d1tzhb1 d4n8pa1 d1gaf11 d2jelh1 d1wioa2 d4i0cc1  
d1cicb1 d1lmka2 d1lmka1 d1liqwh1 d1lorqb1 d1lejoh1 d1jnlh1 d4zga1\_  
d43c9b\_ d1ggbl1 d1wejh1 d3q6fa1 d1f3dj1 d3c6la1 d1bqlh1 d3p9wb\_  
d1a3r11 d1h0db1 d2uzil\_ d1eo8l1 d1qfwl\_ d1n7ml1 d1igja1 d1c5ch1  
d2a9mh\_ d1rmfh1 d1fj1b1 d4heme\_ d1ccza1 d1a5fh1 d1logad1 d1dlfh\_  
d1qa9b\_ d1vge11 d3qskb\_ d1sjxa\_ d4ozfg1 d1sq2n\_ d1qd0a\_ d1kcvh1  
d1c5db1 d3qcul1 d3bn9d1 d1mjuh1 d4y8dc\_ d7fabh1 d3dvgb1 d1lo0l1  
d1a6tb1 d1gigh1 d1kcrh1 d2hwz11 d1yjd1 d3clfl1 d4krna\_ d1d17l\_  
d1e6ol1 d1mexh1 d3r0ma\_ d4kkna\_ d1fnsl1 d1oaqh\_ d1rzia1 d1lucbh1  
d1ncwl1 d4b41a\_ d1nfd1 d2mpah1 d2d7t11 d4grwf\_ d4b5ea\_ d1lk3h1  
d3u79a\_ d4u3xa\_ d1ghf11 d1bvkb\_ d1mcww1 d1b88a\_ d1jrhh1 d32c2b1  
d4wemb\_ d1dsfh\_ d1op3h1 d1cell1 d1liqda1 d1qoka1 d1qoka2 d1qfuh1  
d2crya1 d1ay1h1 d1oaql\_ d3ab0b\_ d1rur11 d1t4kb1 d1bz7b1 d1n0xh1  
d1for11 d1lucb11 d4w6yb\_ d43c9a\_ d2aab11 d1tzia1 d4n1ca\_ d1k6qh1  
d3g9ab\_ d4tvsa1 d1igmh\_ d1pz5b1 d3dx9a1 d3wxwh\_ d1nakh1 d1kcull1  
d3eaka\_ d4qlra1 d1cr9l1 d1d9ka\_ d1f4x11 d1deea1 d2i27n2 d1c12a1  
d2orb11 d1j8hd1 d1mcph1 d1c5da1 d1kenh1 d1bd2e1 d1h5ba\_ d4x7fc1  
d3upaa\_ d1t3fa1 d1lindh1 d2dtgc1 d4hc111 d1zv5a1 d4wgvb\_ d1uwgl1  
d4f37k1 d1aqkh1 d1vesa\_ d3zkqd\_ d1fpt11 d1lo4l1 d1knob1 d3rrqa\_  
d1ct8b1 d4orz\_ d1mlbb1 d4hgkc1 d1dqdl1 d1bogb1 d4ozhe1 d1dr9a1  
d1i7za1 d1dn0b1 d1kell1 d1rzib1 d1ypzf1 d1wtla\_ d1hkfa\_ d1fail1  
d1figh1 d2vyre\_ d1sjva\_ d1ohqa\_ d1bfoa1 d1pkqb1 d1mjul1 d1b4jl1  
d1nsn11 d2arjb1 d1p4bh\_ d4aj0a\_ d3nn8b\_ d2rcja1 d1f2xk\_ d4v1dd\_  
d1adqh1 d2eksa\_ d4k3ga\_ d1jfqh1 d1uweh1 d1frgh1 d4gftb\_ d1uz8b1  
d4nlea\_ d1bm3l1 d1clol1 d3mcka1 d2vq1a1 d1ae6h1 d4aq1b1 d1uj3b1  
d1nbqa1 d1fh5l1 d2ck0l1 d2ywza\_ d1q72l1 d4nxbx\_ d1hila1 d4hz1b1  
d2j88l1 d1zmya1 d1cd0a\_ d1a4ka1 d1pskl1 d1a0qh1 d4krmb\_ d1ncbh1  
d2fbjh1 d1j8he1 d1i3ua\_ d1cf8l1 d1fe8h1 d2plya1 d1eeqa\_ d2x89a\_  
d1ol0a\_ d2r0lh1 d1ub5a1 d1dfbh1 d3eyvb1 d4jdvb1 d4p2cg\_ d2gsia1  
d2agj11 d1u3ha1 d2h1ph1 d1rih11 d1fskc1 d1boga1 d2a77l1 d1osp11  
d1qfoa\_ d3dwta\_ d2fx7l1 d1rz7l1 d3stba1 d1pkqa1 d1b6da1 d1dzba2  
d1dzba1 d1kj2a\_ d4l1ha\_ d1rzgb1 d1dqlh\_ d12e8l1 d1miel1 d1jmaa\_  
d1sbs11 d1fgnh1 d1f58l1 d1mqkh\_ d1ndgb1 d3qegl1 d1iail1 d2aw2a1  
d1tqbc1 d3fo2a1 d4dkaa\_ d1f8th1 d2g60l1 d2ywya\_ d1uj3a1 d1yc7a\_  
d3bd3a\_ d4w6xb1 d1nmb1\_ d1i8ka\_ d1rj1b1 d1ypze1 d1p7kb1 d1kxqe\_  
d1gpoh1 d2z4qa1 d1w72h1 d1i9r11 d4qgya1 d4xt1c\_ d2qqnh1 d1cica1  
d3c08h1 d2cd0a\_ d2bdnh1 d1hnga1 d1mam11 d1nldh1 d1cr9h1 d4lcih1  
d3bkyh1 d3qg7l1 d1ai111 d1kxvc\_ d4iosd\_ d117ih1 d2x1qa\_ d1ub6b1  
d3k74b\_ d1libgh1 d1teth1 d1igya1 d1hxma1 d2x6ma\_ d2e7la\_ d5e03a\_  
d1qfwm\_ d2r0kh1 d1igjb1 d1rurh1 d1plgh1 d1mj8h1 d1yuhb1 d3fmgl1  
d1rzf11 d1emt11 d1ad9b1 d1igtb1 d1nlb11 d1d5ih1 d3k7ua\_ d4ffyh\_  
d1bwwa\_ d3dvga1 d1a6ta1 d1fgvl\_ d4qxgl1 d1mim11 d1jh11\_ d2hffb1  
d2hh0l1 d1qkzh1 d1l7t11 d1afvh1 d1iaii1 d2cjuh\_ d1um5h1 d2ghwb2  
d2ghwb1 d1kgce1 d2fgwh1 d1likfh1 d1dvfd\_ d2i24n1 d2xtjb\_ d1za3b1

d2yc1a\_ d2hh0h1 d2x1oa\_ d1bvka\_ d1rjla1 d5e7ba1 d1igta1 d1il1b1  
d2fb4l1 d1mvua\_ d1jptl1 d32c2a1 d1fvca\_ d1iqdb1 d2hrph1 d2p4ab\_  
d4qo1a\_ d1p2cb1 d1wt5c\_ d1t4ka1 d5c1mb\_ d1it9l1 d1bz7a1 d1b2wh1  
d1e4wl1 d1jnl11 d1yedb1 d1za6b1 d3u7aa\_ d1igfh1 d3gnml1 d1orsa1  
d1wejl1 d1a2ya\_ d1hxmb1 d1gafh1 d2j4wh1 d1pz5a1 d1j05a\_ d1a3rh1  
d4fq1l1 d1qfwh\_ d1eo8h1 d1n7mh1 d4s11a\_ d1kegh1 d5da4a\_ d1iqwl1  
d3whxb1 d1vgeh1 d1deeb1 d1c12b1 d1t2ql1 d1ad9a1 d3gsnb1 d3b2uc1  
d1ggbh1 d1t3fb1 d1nakl1 d4ocmc\_ d1lila1 d2v7hb3 d2esve1 d1mcoh1  
d2qr0b1 d2q3aa\_ d1ct8a1 d1kcr11 d2pxyb\_ d2uzih\_ d5c3ld\_ d3durb\_  
d1c5c11 d2ak4e1 d1d17h\_ d1xiwd\_ d1mlba1 d1rmf11 d1i7zb1 d1dlf1\_  
d2xa3a\_ d5bq7b1 d1dqqb1 d3h42l1 d1legjh1 d1kcv11 d1fe8l1 d2j6e11  
d1f3rb2 d1l1k3l1 d1sm3h1 d1q0xh1 d1ghfh1 d7fab11 d1igch1 d1lo0h1  
d4idla\_ d5c2b1\_ d1jrh11 d1il1a1 d3zhda1 d4kfzc\_ d1b0wa\_ d1e6oh1  
d1mex11 d4krpb\_ d1fnsh1 d1ncwh1 d4hgma\_ d4eigb1 d4rzca\_ d2mpa11  
d4y5xa\_ d5en2b1 d3lrga1 d4ej1c1 d1rhha1 d1j05b\_ d1forh1 d1q9wb1  
d2wzpd\_ d2aq2a1 d1h0da1 d3revb1 d2ij0c1 d1tzha1 d4m7j11 d1k6ql1  
d3b9kc1 d1igml\_ d3geua1 d1dsfl\_ d1celh1 d1kcu11 d1zvha1 d1zvoa1  
d1tqbb1 d1ay1l1 d2qscl1 d2cgrh1 d1nl0h1 d1ken11 d3eo0a1 d4n9ob1  
d1n0x11 d3k1kc\_ d1c4qa\_ d2wv6d\_ d1prt1f\_ d1l1trd\_ d4l63b1 d1r4pb\_  
d1prt1d\_ d1t10f\_ d2bosa\_ d1prt1b1 d3chbd\_ d2aq2b1 d1ck1a1 d1enf11  
d1i4pa1 d1v1oa1 d1esfa1 d2g9hd1 d4ohja1 d1klud1 d1bxta1 d1eu3a1  
d1ty0a1 d1fnua1 d2cqva1 d1fhga\_ d2k1ma\_ d2dl2a1 d1biha3 d1biha1  
d1biha4 d3qp3a1 d1g1ca\_ d1gxea\_ d1cvsc2 d1cvsc1 d1xmwa2 d1m4ka2  
d2otpa2 d1biha2 d1rhfa2 d2fcba2 d2fcba1 d1gsma2 d1lepfa1 d1lepfa2  
d2dava1 d1waaa\_ d1f97a2 d1x44a1 d1vcaa2 d1fnla2 d1fnla1 d3b5ha2  
d3h8na2 d3h8na1 d1jbja1 d1jbja2 d1pd6a\_ d1f2qa2 d1f2qa1 d3cx2a\_  
d1nbqa2 d3b5ha1 d1n26a1 d1xiwb\_ d1xaua\_ d1fltx\_ d2ifga1 d1olla1  
d1olla2 d1cs6a4 d1cs6a3 d1cs6a2 d1cs6a1 d2gw5a2 d1sy6a1 d1xiwa\_  
d1lucta2 d1lucta1 d1ry7b2 d1gl4b\_ d1qz1a3 d1olza1 d2c9aa1 d1wwca\_

**Family-72 (c.55.1.1)**

**Positive dataset contains 8 protein sequences.**

d3uleb1 d3i33a2 d3i33a1 d4ci6a2 d1jcf11 d4a2ba2 d2fxua1 d4cbua2

**Negative dataset contains 4053 protein sequences.**

d1m32a\_ d1libja\_ d1c7na\_ d1iuga\_ d4q75a\_ d2bkwa1 d1t3ia\_ d1n8pa\_  
d1qz9a\_ d1jff9a\_ d1leg5a\_ d1p3wa\_ d3kgwa\_ d2ctza1 d1vjoa\_ d2rfva\_  
d1gc0a\_ d1cs1a\_ d1d2fa\_ d2ch1a1 d1qgna\_ d1pffa\_ d1elua\_ d1c7ga\_  
d2v1pa1 d2ez1a\_ d1u08a\_ d1l1c5a\_ d1b5pa\_ d2ay1a\_ d1bw0a\_ d3pd6a\_  
d7aata\_ d2csta\_ d1j32a\_ d4wlha\_ d1o4sa\_ d1v2da\_ d1gdea\_ d1m6sa\_  
d1v72a1 d1svva\_ d1ajsa\_ d1wsta1 d2f8ja2 d1l1k9a\_ d1vp4a1 d1xi9a1  
d2gb3a1 d1yaaa\_ d3gv5b1 d1t94a2 d3bq0a2 d1js3a\_ d3rcha\_ d3k40a\_  
d1xkta1 d2hfka\_ d5d3ka\_ d1sefa\_ d1sfna\_ d1rc6a\_ d1e57b\_ d1auyb\_  
d2wo3b\_ d1shxa\_ d1f56a\_ d1bypa\_ d1lazca\_ d1ws8a\_ d3u25a\_ d1cuoa\_  
d1id2a\_ d1rkra\_ d2iaac\_ d4dp1x\_ d1nwpa\_ d2gima\_ d2i7sa\_ d1qhqa\_  
d1gyca3 d1hfua2 d1kbva1 d1kbva2 d1sdda1 d1sdda2 d1gyca2 d1mzya1

d2bw4a1 d1aoza1 d1aoza3 d1aoza2 d1kyaa2 d1kyaa3 d1kyaa1 d1mzya2  
d4e9sa1 d1sddb1 d1sddb2 d1hfua1 d1hfua3 d1oela2 d1oela1 d1v10a2  
d1v10a3 d1v10a1 d2cfba1 d1dfoa\_ d1o69a\_ d1bj4a\_ d3k28a\_ d2bwpa\_  
d3lg0a\_ d2fnua\_ d3ou5a\_ d1z7da1 d1iaya\_ d4msoa\_ d1bs0a\_ d1s0aa\_  
d1sffa\_ d3tqxa\_ d1mdoa\_ d3qboa\_ d3pgya\_ d1bjna\_ d2dkja\_ d1ejia\_  
d1vefa1 d4wxga\_ d3bs8a\_ d3gbxa1 d1w23a\_ g1gk9.1 g1or0.1 gle3a.1  
d3sxwa1 d4luka\_ d2bema\_ d1ea9c1 d1qhoa1 d2fhfa2 d2fhfa1 d1k3ia1  
d1j0ha1 d1cxla1 d2bhua1 d1edqa1 d1f1sa2 d1ut9a2 d1gvia1 d1txka1  
d4alac\_ d1rera1 d1s6na\_ d3uzqb\_ d2phla2 d2phla1 d1fxza2 d1fxza1  
d1lrha\_ d1uija1 g1dgw.1 d2v09a\_ d1uika2 d1uika1 d1dgwa\_ d1lep0a\_  
d2pa7a1 d1wlta1 d1nxma\_ d2c0za1 d1ds6b\_ d1fstb\_ d3us3a3 d3us3a1  
d1tafa\_ d1tafb\_ d1jfib\_ d1q9ca\_ d1h3ob\_ d2byka1 d1n1ja\_ d4g92b\_  
d1bh9a\_ d1jfia\_ d1h3oa\_ d2bykb1 d1n1jb\_ d1cg2a1 d1yloa2 d1y7ea2  
d1y0ya3 d1lfwa1 d1vixa1 d1fnoa4 d1vhoa2 d1ysja1 d1vhea2 d1z21a1  
d2fvga2 d1vgya1 d1r3na1 d2grea2 d1xmba1 g1q71.1 d1eixa\_ d3exra\_  
d2ffca1 d2fdsa1 d3n3ma1 d2czda\_ d1q6oa\_ d2yyua\_ d1vqta1 d1dbta\_  
d3ldva1 d2bjca1 d2hsga1 d1qpza1 d1efaa1 d1ydwa2 d2nvw2 d1h6da2  
d1zh8a2 d1xeea2 d1tlta2 d1ebfa2 d1r0ka3 d1j5pa3 d1vkoa2 d1vm6a2  
d3qvsa2 d1gr0a2 d1p1ja2 d2ovga\_ d1sq8a\_ d1rzsa\_ d3kz3a\_ d3orca\_  
d3gpdg2 d2q49a2 d1hdgo2 d2g17a2 d2cvoa2 d2czca1 d3pwka2 d1obfo2  
d1i32a2 d1zyao2 d2pkqo2 d1b7go2 d2hjsa2 d1cf2o2 d1vkna2 d1nvm2  
d41t9a1 d3tc7a1 d3hoja\_ d1i4na\_ d3vnda\_ d3n18a1 d1geqa\_ d3nava1  
d1v5xa\_ d4a2ra1 d3tc6a1 d1ujpa\_ d4ijba\_ d1xcfa\_ d1rd5a\_ d1qopa\_  
d3b5va\_ d2msya\_ d2djoa1 d2r5za\_ d1au7a1 d1f43a\_ d21mda1 d1akhb\_  
d1s7ea1 d3nara\_ d1zq3p1 d2craa1 d1mija\_ d4uuta\_ d3a01a\_ d1x58a1  
d3rkqa1 d3cmya1 d2cqxa1 d2da6a1 d1e3oc1 d1fjla\_ d1mh3a1 d1ig7a\_  
d1x41a1 d1wh7a1 d1gt0c1 d2mw8a\_ d1lfup\_ d1x2ma1 d1b72a\_ d1wi3a1  
d1jgga\_ d1wjha1 d1x2na1 d1mnmc\_ d2cuea1 d3k2aa\_ d2hosa\_ d2jwta2  
d1pufa\_ d1octc1 d2hi3a\_ d1b8ia\_ d4j19a\_ d3lnqa\_ d1wh5a1 d1b8ib\_  
d1hcra\_ d1tc3c\_ d1gdta1 d1u78a2 d6paxa1 d6paxa2 d1k78a2 d1hlva1  
d1hlva2 d1iufa2 d1iufa1 d2iu5a1 d1zk8a1 d2g7sa1 d2fd5a1 d2np5a1  
d1z0xa1 d2id6a1 d2d6ya1 d2i10a1 d2oi8a1 d3c07a1 d2ns7a1 d2fq4a1  
d2yvea1 d1t33a1 d2o7ta1 d1rkta1 d2np3b1 d2g7ga1 d2gena1 d2fbqa1  
d2g7la1 d2gfna1 d2g3ba1 d2jj7a1 d2hyja1 d1sgma1 d1ui5a1 d2hkua1  
d2id3a1 d4jyka1 d3lv8a\_ d1s3ga1 d1zaka1 d1s4qa\_ d3tvta2 d1uf9a\_  
d1khta\_ d1ckea\_ d1osna\_ d1p5zb\_ d4tmka\_ d3cm0a\_ d1jaga\_ d3h86a\_  
d1t0hb\_ d1nn5a\_ d2h92a\_ d3kb2a1 d2c95a1 d1yj5a2 d1kgda\_ d1ly1a\_  
d2ak3a1 d1vyva2 d1deka\_ d2grja1 d1p3ja1 d1y63a\_ d1e4ya1 d1s96a\_  
d3iija1 d1lvga\_ d1nksa\_ d1vyua2 d4e22a\_ d1qf9a\_ d1jjva\_ d1q3ta\_  
d1ki9a\_ d1lw7a2 d1teva\_ d1kjwa2 d1gsia\_ d2iyva2 d1viaa\_ d1e6ca\_  
d1g3ma\_ d1j99a\_ d1t8ta1 d1nsta\_ d1fmja\_ d1zrha\_ d1ls6a\_ d2a3ra\_  
d1aqua\_ d2zptx\_ d3ckla\_ d1texa\_ d1q44a\_ d2gwaha\_ d1odfa\_ d1uj2a\_  
d4gi7a\_ d2jeoa1 d1rz3a\_ d1z0ja1 d3umra2 d3gj0a1 d2gaoa1 d1yzga1  
d1x3sa1 d1g7sa4 d1puja\_ d1udxa2 d1kk1a3 d2o52a\_ d1jwyb\_ d1zcaa2

d1zcba2 d2fv8a1 d2cjwa\_ d3dz8a1 d1xzpa2 d1vg8a\_ d4qxaa\_ d2ew1a1  
d1x1ra1 d2bcgy\_ d3doea1 d3cona\_ d3rega\_ d3wyga\_ d1upta\_ d2b6ha1  
d1zd9a1 d1lnza2 d1r5ba3 d1n0ua2 d1r2qa\_ d2f91a1 d2rhda\_ d3q3jb\_  
d3q85a\_ d1efma1 d1r8qa\_ d2gf9a1 d2akab1 d1ek0a\_ d1z08a1 d2gcoa1  
d2dy1a2 d4g01b\_ d2cxxa1 d1svia\_ d3q72a\_ d1ni3a1 d4ac9a4 d2erxa1  
d2bmea\_ d1wxqa1 d2gf0a1 d41dja1 d1zunb3 d1d5ca\_ d41v5b\_ d1efca3  
d1kmqa\_ d2g6ba1 d3lrpa\_ d1tada2 d2y8ea\_ d4rd4a1 d1z06a1 d2heia\_  
d3a58b\_ d1u01a2 d1d2ea3 d1zj6a1 d2ocba\_ d3rwoa\_ d1mr3f\_ d2e9sa1  
d4u5xa1 d2iwra\_ d2fn4a1 d3bwdd\_ d2nzja1 d2atva1 d2ksqa\_ d3l43a\_  
d1mkya2 d1mkya1 d1wmsa\_ d1jnja3 d2rmka\_ d1f6ba\_ d1f60a3 d1gota2  
d1jala1 d2fh5b1 d1g16a\_ d2wblc\_ d1m7ba\_ d1wf3a1 d1f5na2 d1t9ha2  
d1z6xa1 d1z0aa1 d2fg5a1 d2a5ja1 d2bcjq2 d1s0ua3 d1ky3a\_ d4y0va\_  
d4lhwa\_ d2qmea1 d2atxa1 d1legaa1 d1ryha\_ d1moza\_ d1nrjb\_ d2erya1  
d3bfka\_ d1puia\_ d3j3az1 d3t5ga\_ d1shza2 d3defa\_ d2f7sa1 d3raba\_  
d3tsoa\_ d3aq4a\_ d2a17a1 d3sfva1 d3bc1a\_ d2ncda\_ d1sdma\_ d3h4sa1  
d2heha\_ d2grya\_ g3kin.1 d1br2a2 d1goja\_ d1f9va\_ d2mysa2 d1lkxa\_  
d3t0qa\_ d4db1a1 d3gbja\_ d1ry6a\_ d1v8ka\_ d1ogpa1 d2m9wa1 d3dfxa\_  
d3vrda1 d3vrda2 d1fcdc2 d1fcdc1 d1h1oa2 d1m70a2 d1m70a1 d1iqca2  
d1iqca1 d1eb7a1 d1nmla2 d1nmla1 d1nira1 d1qksa1 d3h1jd1 d1hroa\_  
d4gedb\_ d3zooa\_ d1mz4a\_ d1gu2a\_ d1f1fa\_ d1dvva\_ d1c6ra\_ d1c75a\_  
d1e29a\_ d1gdva\_ d1cnoa\_ d1h32b\_ d1co6a\_ d2bh4x\_ d2aiua\_ d5cytr\_  
d1jdl\_ d1i8oa\_ d2zboa\_ d3dmia\_ d1ls9a\_ d1wvec\_ d2yk3a\_ d3ph2b\_  
d1dw0a\_ d5aura\_ d1ql3a\_ d1qn2a\_ d1f1ca\_ d4zzva\_ d2xspa\_ d1eg1a\_  
d4v20a\_ d4ipma1 d1gpia\_ d4csia\_ d3pfza\_ d3ovwa\_ d2yoka\_ d2nqya\_  
d1h4ga\_ d1hixa\_ d1oa2a\_ d1olra\_ d3b7ma\_ d4h7ma1 d3wp3a\_ d2vgda\_  
d1igoa\_ d3zsea\_ d2nlra\_ d3wx5a\_ d1oa3a\_ d1pvxa\_ d1m4wa\_ d1f5ja\_  
d1oa4a\_ d4ix1a1 d1h32a2 d4x51a\_ d1d9ca\_ d4ypgc1 d3oq3a\_ d1lqsl\_  
d1n1fa\_ d1aula\_ d1wu3i\_ d3bes1\_ d3ux9a\_ d3rbaa\_ d2qtra\_ d1nupa\_  
d3l92a\_ d1f9aa\_ d1qjca\_ d2h29a\_ d1vlha\_ d1od6a\_ d1lw7a1 d1mrza2  
d4ruka\_ d2el7a\_ d1iq0a2 d1irxa2 d1r6ta2 d1ivsa4 d2cyba\_ d1rqga2  
d1j09a2 d2yxna\_ d1f7ua2 d1h3fa1 d2g36a1 d1nzja\_ d1jila\_ d1n3la\_  
d1i6la\_ d1pfva2 d1h3na3 d3n9ia\_ d3sz3a1 d3sw2a\_ d1moxc\_ d1dx5i3  
d1edmb\_ d1aut12 d1aut11 d1nqlb\_ d1dval1 d1szba2 d1kigl\_ d2y5f1\_  
d1ijqa2 d1gk5a\_ d1g1sa2 d1nt0a3 d1xdtr\_ d1lmja2 d1lmja1 d1nzia2  
d2wphe\_ d1klil\_ d1pfxl2 d1pfxl1 d1p9ja\_ d1g1ta2 d1f7ea\_ d4yzub\_  
d1lr7a1 d1lix2a\_ d2y5ia\_ d1qlsa\_ d1psra\_ d3n22a\_ d2egda\_ d4ggfc\_  
d2wcea\_ d2luca\_ d4aqia\_ d3nsia\_ d2lp3a\_ d1j55a\_ d1a4pa\_ d1k8ua\_  
d1nsha\_ d1pvaa\_ d3fs7a\_ d1ttxa\_ d1rwya\_ d2kyfa\_ d1rk9a\_ d1a75a\_  
d1exra\_ d1tiza1 d1nyaa\_ d1g8ia\_ d1ggwa\_ d1wdcc\_ d3fwba\_ d1ggza\_  
d2o5ga\_ d1ctaa\_ d1m45a\_ d3i5gc\_ d1sl8a\_ d1fpwa\_ d2scpa\_ d2roaa\_  
d4aqra\_ d3pn7b\_ d1br1b\_ d2mysb\_ d1s6ca\_ d1bjfa\_ d2obha\_ d1jfka\_  
d1jf0a\_ d1qv0a\_ d1lkja\_ d2mlfc\_ d2m97a\_ d2d8na\_ d4by5a\_ d1jbaa\_  
d4nqga\_ d1wdcb\_ d2mysc\_ d1j7qa\_ d1s6ia\_ d1uhka2 d1r2ua\_ d1dtla\_  
d3kf9a\_ d3pn7c\_ d1qjta\_ d1fi6a\_ d1c07a\_ d1gjya\_ d1y1xa\_ d1hqva\_

d1dvia\_ d1df0a1 d4usla\_ d1k94a\_ d1sfsa\_ d1jfxa\_ d1wkya2 d1uuqa\_  
d3wh9a\_ d4m1ra\_ d1xyza\_ d4xuya\_ d2je8a5 d4bf7a1 d3cuia\_ dlur4a\_  
d1qw9a2 d1odza\_ d2vzsa5 d1bqca\_ d2x2ya1 d1hjqa\_ d1qnra\_ d4y7ea1  
d1vjza\_ d4k68a\_ d2v3ga\_ d4hpga\_ d1nofa2 d1h4pa\_ d1aq0a\_ d3ziza\_  
d4bs0a\_ d1ecea\_ d1h1na\_ d1ta3b\_ d1w91a2 d1ilwa\_ d1uhva2 d1us3a2  
d1legza\_ d7a3ha\_ d1tvna1 d3nyda1 d1ghsa\_ d2cyga1 d4xv0a\_ d2c8na2  
d1w32a\_ d3emca\_ d1v6ya1 d1foba\_ d2uwfa1 d2fgla\_ d3niya1 d2c0ha1  
d1rh9a1 d1yq2a5 d1szna2 d1fa2a\_ d1pama4 d5do8a1 d1ea9c3 d1hx0a2  
d2fhfa5 d1qhoa4 d1avaa2 d1m53a2 d4m8ua1 d2gjpa2 d1lwha2 d4howa1  
d1ktba2 d1j0ha3 d3vm5a1 d2x1ia\_ d1wzaa2 d1uasa2 d2diea1 d1mxga2  
d1ht6a2 d1eswa\_ d1iv8a2 d5cpsa\_ d1ud2a2 d1zjaa1 d3gbea1 d1kwga2  
d1wdpa\_ d1gcy2 d1g5aa2 d1hvxa2 d3dhpa2 d2bhua3 d4do4a1 d3ggva1  
d1e43a2 d1g94a2 d2d3na2 d1gjwa2 d1gvia3 d1x1na1 d1r7aa2 d1tz7a1  
d2x42a1 d1tr9a1 d3abza1 d4c7ga2 d2gjxa1 d1jaka1 d1yhta1 d4toqa\_  
d1wb0a1 d1w9pa1 d1eoka\_ d1itxa1 d1kfw1 d1goia2 d1ledqa2 d2gsja\_  
d1hjxa1 d1jnda1 d1vf8a1 d3wdpp1 d3wq5a\_ d4gxp1 d4hz8a\_ d1e4mm\_  
d3aiua\_ d1wcga1 d1qvba\_ d3ahxa\_ d1v02a\_ d2dgaa\_ d1pbga\_ d1vffa1  
d1qoxa\_ d4ha4a\_ d2w0pa\_ d2diaa1 d2e9ia2 d2e9ja1 d2dj4a1 d2eeba1  
d2diba1 d2dmba1 d2dmca1 d2d7oa1 d2ee6a1 d2d7pa1 d2eeaa1 d2di8a1  
d1wlha1 d2d7na1 d2nqca\_ d2d7ma1 d2dica1 d3cnka\_ d2k3ta1 d2eeca1  
d1qfha1 d2bp3a1 d1v05a\_ d2ee9a1 d2eeda1 d2di9a1 d3syxa1 d1mkea1  
d2p8va\_ d1xoda1 d1i7aa\_ d1evha\_ d1qc6a\_ d1xl4a1 d3vsqa\_ d2gixa1  
d1p7ba1 d1b9ra\_ d1offa\_ d1frra\_ d3wcqa\_ d1e9ma\_ d1l5pa\_ d1wria\_  
d1i7ha\_ d3av8a\_ d1czpa\_ d1rfka\_ d3p1ma1 d3b2ga\_ d2bt6a2 d1wgqa1  
d1v89a1 d2coda1 d1zc3b\_ d1wg7a1 d1u5ea1 d1v61a1 d2coca1 d2ys1a1  
d1v5pa1 d1ntya2 d1wjma1 d1wila1 d1u29a\_ d1xx0a1 d1unqa\_ d2zkmx3  
d1fhoa\_ d1v88a1 d2adza1 d1x1fa1 d1p6sa\_ d2coaa1 d1btka\_ d1v5ma1  
d1faoa\_ d2x18a\_ d1dyna\_ d1x1ga1 d4kaxb\_ d2j59m1 d1xcga2 d1txda2  
d1u5da1 d1dbha2 d1wlha\_ d1upqa\_ d1v5ua1 d1foea2 d2fjla1 d1eaza\_  
d2dfka2 d2cofa1 d1kz7a2 d9ldta1 d2ewda3 d1up7a1 d2dfda1 d1s6ya1  
d1vjta1 d7mdha1 d1hyea1 d1t2da1 d1ojsa3 d1b8pa1 d1ldna1 d1hyha1  
d1civa1 d2a92a1 d1ez4a1 d1i0za1 d1y6ja1 d1gv0a1 d1ur5a1 d1llda1  
d1obba1 d1v8ba1 d1gdha1 d1l7da1 d2dl1a1 d1mx3a1 d1ygya1 d1qp8a1  
d1li4a1 d1j4aa1 d2naca1 d1npya1 d3t4ea2 d1a4ia1 d1o0sa1 d2hk9a2  
d2egga2 d1b26a1 d1bvua1 d1gq2a1 d1c1da1 d1gtma1 d1euzal d1nvtal  
d3dona2 d1edza1 d1gpja2 d1vi2a1 d1p77a1 d1nyta1 d1b0aa1 d1vl6a1  
d1v91a1 d1txga2 d3f47a1 d1mv8a2 d2pv7a2 d1xc2a3 d2ahra2 d4xiya1  
d2f1ka2 d1i36a2 d1np3a2 d1lj8a4 d1teaa3 d1qmga2 d2i76a2 d2g5ca2  
d1wdka3 d1dlja2 d3cuma3 d1kola2 d1f8fa2 d1qora2 d1jqba2 d1vj0a2  
d1cdoa2 d1gu7a2 d1d1ta2 d1xa0a2 d2dm6a2 d1jvba2 d1rjwa2 d1llua2  
d1h2ba2 d1tt7a2 d1piwa2 d1o89a2 d1iz0a2 d1e3ja2 d1yb5a2 d1uufa2  
d1vj1a2 d1e3ia2 d3gpdg1 d1vc2a1 d2nvwa1 d1u8fo1 d1ydwa1 d1hdgo1  
d2g17a1 d2czca2 d1r0ka2 d1obfo1 d2cvoa1 d1ebfa1 d1h6da1 d1i32a1  
d1zh8a1 d2q49a1 d1qkia1 d1j5pa4 d3pzra1 d1xeaa1 d1vkoa1 d1vm6a3

d3qvsa1 d2pkqo1 d1b7go1 d1gr0a1 d1p1ja1 d1lc0a1 d1j0xo1 d3pwka1  
d2hjsa1 d1zyao1 d1vkna1 d1tlta1 d1nvmb1 d3sjua\_ d3ojfa1 d1xu9a1  
d2jjya1 d1n7ha\_ d1y1pa1 d1h5qa\_ d1jtva\_ d4fs3a\_ d2bkaa1 d1gy8a\_  
d2c5aa1 d1ulsa\_ d1ooea\_ d2b69a1 d1y5ma1 d1spxa\_ d1ae1a\_ d1ydea1  
d1gega\_ d1hdoa\_ d1o5ia\_ d1e6ua\_ d1snya1 d2rhca\_ d3zv4a\_ d5ceja\_  
d2d1ya1 d1fjha\_ d3w8ea\_ d2fmua1 d1x1ta\_ d1rpna\_ d3ay7a1 d1k2wa\_  
d1eq2a\_ d2hrba1 d3ruaa\_ d2ew8a1 d4hwka\_ d1xgka\_ d2bd0a1 d1yo6a1  
d2a35a1 d2ntva\_ d1vl8a\_ d1hdca\_ d4bkua\_ d2ag5a1 d2q45a\_ d1nffa\_  
d4iy1a\_ d1zbqa1 d1kewa\_ d1ek6a\_ d1ja9a\_ d2q46a2 d1iy8a\_ d1cyda\_  
d2ptga\_ d1hxha\_ d1uzma1 d3ly1a\_ d4m89a\_ d3wyea\_ d2b1la1 d1w6ua\_  
d1sb8a\_ d2q2va\_ d4nr0a\_ d1e6wa\_ d2gasa\_ d3oiga1 d2bgka1 d1mxha\_  
d1vl0a1 d1rkxa\_ d1r6da\_ d1wmaa1 d1e7wa\_ d2c07a1 d1xkqa\_ d3tzha\_  
d1g0oa\_ d3lz6a\_ d1qyca\_ d1ledoa\_ d1gz6a\_ d1oc2a\_ d1t2aa\_ d1zema1  
d2xoxa\_ d1z45a2 d1geea\_ d1p33a\_ d3lt0a\_ d4e6pa\_ d2wyua\_ d1db3a\_  
d4q9na\_ d1xh1a\_ d4o1ma\_ d1fmca\_ d2uvda\_ d2gdza1 d1uaya\_ d2z1ma\_  
d2o23a2 d2fr1a2 d2fr1a1 d1qsga\_ d1qyda\_ d4zjua\_ d2a4ka1 d1yb1a\_  
d1wvga1 d1yxma1 d3f4ba\_ d1mg5a\_ d1xg5a1 d1r55a1 d3gboa\_ d1atla\_  
d1kufa\_ d1buda\_ d4q1la\_ d1ypla\_ d1wnia\_ d1mdwa\_ d1qxp4 d1zival  
d1zcmal d1mixa2 d1e5wa2 d1isna2 d2a16b2 d3ioqa\_ d1fh0a\_ d1o0ea\_  
d1khqa\_ d1m6da\_ d2cb5a\_ d1cs8a\_ g8pch.1 d1s4va\_ d2pnsa\_ d1vsna1  
d1mira\_ d1liwda\_ d2oula\_ d7pcka\_ d3bwka\_ d3bcna\_ d2p86a\_ d1pvja\_  
d1pcia\_ d1gece\_ d1deua\_ d4bs6a\_ d1xkga1 d1cqda\_ d1jqpa2 d2c0ya\_  
d2bdza\_ d3p5ua\_ d1zoya1 d1qo8a2 d1d4ca2 d1jnra2 d1kf6a2 d2jk6a2  
d2jk6a1 d1feca1 d1feca2 d1lpfa1 d1lpfa2 d1xhca1 d1xhca2 d1dx1a2  
d1dx1a1 d1gera2 d1m6ia2 d1onfa1 d1onfa2 d3lada2 d3lada1 d1w4xa1  
d1w4xa2 d1gesa2 d1mo9a1 d1xdia1 d1fl2a2 d1fl2a1 d1fcda1 d1fcda2  
d1h6va2 d1h6va1 d1mo9a2 d1gv4a2 d1gv4a1 d2gv8a2 d2gv8a1 d1aoga1  
d1aoga2 d1hyua1 d1ebda1 d1ebda2 d3dk9a1 d1qlra2 d1qlra1 d1gesa1  
d1pv8a\_ d1w5qa\_ d2c1ha\_ d1l6sa\_ d1zbfal d2z1ha\_ d2etja1 d3qioa1  
d1j11a\_ d2e41a\_ d1j12a\_ d2lsna1 d1io2a\_ d1uaxa\_ d2yv0x\_ d1mu2a1  
d1ekea\_ d1i39a\_ d1ps9a2 d1o94a2 d1lqta1 d1cjca1 d1pn0a1 d1ju2a1  
d2f5va1 d3c96a1 d2gmha1 d1pj5a2 d1gpea1 d1o5wa1 d1n4wa1 d1k0ia1  
d2dw4a2 d2ivda1 d1seza1 d2voua1 d1kdga1 d1s5ja1 d2hbja2 d2igia\_  
d1wlja\_ d1qhta1 d4dlea1 d1tgoa1 d2f96a1 d3tr8a1 d3mxma\_ d1y97a1  
d1w0ha\_ d1kfsa1 d2py5a1 d1noya\_ d1d5aa1 d1yt3a3 d2guia\_ d3mwpal  
d4kb1a\_ d1liv0a\_ g1apy.1 d3ljqa\_ g1k2x.1 d1iuka\_ d2csua1 d3q9ub\_  
d2yv1a1 d3q9na\_ d2d59a\_ d1oi7a1 d2yv2a1 d1euca1 d1y81a1 d1r7ha\_  
d1faaa\_ d1wika1 d1xfla\_ d1ttza1 d2f51a1 d1ti3a\_ d1nhoa\_ d1sena\_  
d2i4aa\_ d1ep7a\_ d1zmaa1 d1fo5a\_ d3lefa1 d3diea1 d2yana1 d1z6na1  
d1oaza\_ d3zywa1 d4aj8a\_ d4fiwa\_ d1wmja\_ d4hs1a1 d1liloa\_ d1xwaa1  
d1wjka1 d2vm1a\_ d1fb6a\_ d1gh2a\_ d1h75a\_ d1nw2a\_ d1kx5b\_ d3a6na\_  
d4m6ba2 d2nqbd\_ d3wkjd\_ d2yfwe\_ d4h9na\_ d5bnxa\_ d1kx5c\_ d3r45a\_  
d1eqzb\_ d4jjnb\_ d1f66c\_ d1eqza\_ d4wnnb\_ d1kx5a\_ d1u35c1 d1id3a\_  
d2nqbc\_ d1kx5d\_ d1ku5a\_ d1b67a\_ d2b5ea2 d2b5ea3 d2b5ea1 d2b5ea4



d2kp1a1 d2kp2a1 d1hyua4 d1j08a1 d1j08a2 d1pd212 d1nhya2 d2a2ra2  
d1k0dd2 d1f2ea2 d1gsua2 d1f3ba2 d2fhea2 d2pvqa1 d1tw9a2 dloyja2  
d1e6ba2 d1k0ma2 d3ik7a1 d4is0a1 d1r5aa2 d1jlva2 d1m0ua2 d3gtub2  
d1z9ha2 d1okta2 d1axda2 d2gsra2 d1tu7a2 d1k3ya2 d1zgm1 d1b48a2  
d1gnwa2 d1gwca2 d2gsta2 d1glqa2 d1oe8a2 d1pn9a2 d1v2aa2 d1fw1a2  
d1duga2 d1a0rp\_ d1qsaa2 d3wyha\_ d4g9sa1 d3gxra\_ d1qqya\_ d1f6ra\_  
d1livma\_ d2gv0a\_ d1iiza\_ d2z2fa\_ d1j8xa\_ d1ghla\_ d1b9oa\_ d1741a\_  
d1691a\_ d2o4wa\_ d1p37a\_ d1k28a3 d1xjta1 d1jtma\_ d2f2qa\_ d4e97a1  
d1g4ma1 d2za0a\_ d2c21a1 d1f9za\_ d1mpya2 d1kw3b2 d1kw3b1 d4ghga1  
d1tfza1 d3isqa1 d3isqa2 d1sqia1 d1sqia2 d1lkda2 d1lkda1 d1mpya1  
d1cjxa2 d1sp9b2 d1t47a1 d1t47a2 d1f1ua2 d1sp8a1 d1sp8a2 d1f1ua1  
d4iuaa3 d4bvva\_ d5hpga\_ d3k65a\_ d1ki0a3 d1ki0a2 d1ki0a1 d1a0ha1  
d3sp8a3 d2feba1 d1qsta\_ d2beia1 d4m3sa\_ d1u6ma1 d1ygha\_ d1yk3a1  
d3dr6a\_ d1xmta\_ d1z4ea1 d2ge3a1 d1bo4a\_ d2fiaa1 d2jdca1 d1y9wa1  
d3to7a\_ d1wwza1 d2f14a1 d2ozua1 d2b5ga\_ d2cy2a1 d2p0wa\_ d1cm0a\_  
d4pswa\_ d1yrea1 d1yr0a1 d1m4ia\_ d2gana1 d1yvka1 d1ghea\_ d2g3aa1  
d1y7ra1 d2euia1 d1q2ya\_ d2fsra1 d1xeba\_ d2ae6a1 d1cjwa\_ d1qsma\_  
d2aj6a1 d1y9ka1 d1i12a\_ d1vkca\_ d2atra1 d1n71a\_ d2d4pa1 d2fiwa1  
d2fe7a1 d1tiqa1 d2ou2a\_ d1yx0a1 d2fcka1 d1p0ha\_ d2j8ma\_ d2pq8a\_  
d1z4ra1 d1s3za1 d1ufha\_ d1xvqa1 d1pn0a2 d3hy2a\_ d2cvba1 d1o8xa\_  
d1lu4a\_ d1we0a1 d2bmx1 d2a4va1 d1psqa\_ d1xiya1 d1q98a\_ d1n8ja\_  
d1zofa1 d2ggta\_ d3tjja\_ d4je1a1 d1o73a\_ d3s9fa\_ d2zcta\_ d1qmva\_  
d1jfua\_ d2b1ka\_ d5dvba1 d2b5xa1 d2v2ga\_ d3tb2a\_ d41lra\_ d4fh8a1  
d1e2ya\_ d1knga\_ d2h30a\_ d1i5ga\_ d2z9sa\_ d2f8aa1 d1tp9a1 d2b7ka\_  
d1nm3a2 d3hvva\_ d2wfca1 d4kcea\_ d1xvwa1 d4gqca1 d3qpma\_ d4k1fa\_  
d1zzoa1 d1gp1a\_ d1prxa\_ d1rmka\_ d1ixta\_ d1eyoa\_ d1cna\_ d1fu3a\_  
d1g1pa\_ d1f3ka\_ d1e88a1 d1l6ja5 d1l6ja4 d1eaka4 d1eaka3 d1l6ja3  
d1h8pa2 d1h8pa1 d1w52x1 d2pp1a1 d1hpla2 d1lpbb2 d2oxea1 d1bu8a2  
d1rp1a2 d1ys1x\_ d4hs9a\_ d1ispa\_ d1ex9a\_ d1ku0a\_ d3qmma\_ d1ra6a\_  
d1muka\_ d3gsza\_ d1khva\_ d1te9a\_ d2xwha\_ d3uqsa\_ d3hkwa\_ d3n6ma\_  
d2cjqa\_ d2xyma\_ d1teba\_ d1te8a\_ d1s48a\_ d1u09a1 d4wfxa\_ d3tyqa\_  
d2pgga1 d1lgya\_ d4l3wa\_ d1gz7a\_ d1ukca\_ d2ftba\_ d1mpa\_ d2rcqa1  
d1fdqa\_ d4lkpa\_ d1sa8a\_ d1vyfa\_ d1lpja\_ d3vg7a1 d4azqa1 d5bvqa\_  
d1p6pa\_ d2qo4a\_ d1opba\_ d1yiva1 d1o1va\_ d4bvma1 d4tkba\_ d4i3ba\_  
d1bwya\_ d1ftpa\_ d1ggla\_ d4gkca\_ d1cbia\_ d3p6da1 d1kqwa\_ d2a0aa1  
d3zxha\_ d1cgla\_ d1rm8a\_ d1eaka2 d2jsda\_ d1cxva\_ d1hv5a\_ d1i76a\_  
d3p0ya1 d1igra1 d1igra2 d1n8yc1 d1m6ba2 d1m6ba1 d4dv8a2 d1j7na1  
d4tlja\_ d2a2ua\_ d4wfva\_ d3t1da\_ d4iaxa\_ d3zq3a\_ d2nnda\_ d1i4ua\_  
d1kxoa\_ d1bbpa\_ d1kt7a\_ d1exsa\_ d3s26a1 d1lf7a\_ d1qfta\_ d4gh7a\_  
d1z24a1 d1qabe\_ d1xkia\_ d1ew3a\_ d3bx7a\_ d4iawa1 d1n0sa\_ d1gkab\_  
d3kzaa\_ d2k23a\_ d2l9ca1 d2joza1 d1gm6a\_ d3kffa\_ d3saoa1 d1e5pa\_  
d1yupa1 d1iiua\_ d1jgta2 d1ea0a3 d1ecfa2 d1q15a2 d1ct9a2 d1ao0a2  
d1te5a\_ d1ohfc\_ d2tbvc\_ d1c8nc\_ d1x36a\_ d1smvc\_ d1ng0c\_ d4sbvc\_  
d1lopa\_ d1cixa\_ d1y29a\_ d1v7fa\_ d2jtba\_ d1d1ha\_ d1g9pa\_ d1lupa\_

d1qk7a\_ d1mb6a\_ d2a2va\_ d1niya\_ d1i25a\_ d1hvwa\_ d2mpqa\_ d1ie6a\_  
d1kqha\_ d1la4a\_ d2mxoa1 d1d10a\_ d1koza\_ d1qk6a\_ d1emxa\_ d1lqra\_  
d1c6wa\_ d1js9c\_ d1f15b\_ d1za7a\_ d1laja\_ d1rypd\_ d1irua\_ d1rypc\_  
d3unfk\_ d1rypa\_ d1j2pa\_ d1lirui\_ d1j2qh\_ d3unfh\_ d1m4ya\_ d1rypb\_  
d1liru1\_ d1lirug\_ d1liru2\_ d1q5rh\_ d1rypg\_ d1g3ka\_ d1liruf\_ d1q5qa\_  
d1e94a\_ d1lirub\_ d1ryph\_ d3ty6a\_ d1liruj\_ d1liruk\_ d1rype\_ d1lirud\_  
d1lirue\_ d3mi01\_ d1rypf\_ d1liruh\_ d2z3ba\_ d1liruc\_ d3mka2\_ d1liru1\_  
d1ny721 d1ny722 d1a6ca3 d1a6ca2 d1a6ca1 d1pgl22 d1pgl21 d1pgl11  
d1mqta\_ d1d4m3\_ d1fmd3\_ d2mev1\_ glaym.1 d1ev13\_ d4q4w1\_ d1rla3\_  
d2x5ia\_ d1rhi1\_ g1r1a.1 g1d4m.1 g1rhi.1 d1b35b\_ d1loopa\_ d1tme1\_  
d4iv1a\_ g1pvc.1 g1fpn.1 d1fpn1\_ d4gb31\_ d1d4m1\_ d1fmd1\_ d1ev11\_  
d2wzr3\_ g1cov.1 d1qqp3\_ g1fmd.1 d2x5ic\_ d1rhi3\_ gloop.1 d1hxs1\_  
d1fpn3\_ d1bev1\_ g2mev.1 d1eah3\_ d1aym1\_ d1pvc3\_ d1qqp1\_ d1zba3\_  
d1h8ta\_ d3vbhc\_ g1b35.1 g1bev.1 d1hxs3\_ g1ev1.1 d1bev3\_ g1tmf.1  
d1tmf1\_ d1b35a\_ d2mev3\_ g1eah.1 g1h8t.1 d1eah1\_ d4q4w3\_ d1rla1\_  
d1aym3\_ d1pvc1\_ d1zba1\_ d1h8tc\_ d1loopc\_ d1tme3\_ g1qqp.1 d4iv1c\_  
g1tme.1 d1y14b1 d2nn6i1 d1i941\_ d2zjra2 d1smxa\_ d2qamc2 d1hh2p1  
d2r7da1 d1rl2a2 d1wfga1 d3bzka4 d1x6oa2 d3a0ja\_ d2j01d2 d2ja9a1  
d4q15a\_ d1luza\_ d2n3sa\_ d2vnud1 d1h95a\_ d1go3e1 d2nn6h1 d1ne3a\_  
d2mo1a\_ d1liz6a2 d1jjga\_ d1e3pa2 d2ix0a3 d2ix0a2 d21xja\_ d1ueba3  
d1ueba2 d2z0sa1 d1u0la1 d2ix0a1 d2eifa2 d2je6i1 d3i2za1 d2c35b1  
d2ahob2 d1t9ha1 d3i4oa\_ d2qall1 d1jt8a\_ d2nn6g1 d1g6pa\_ d3cama\_  
d1i94q\_ d1c9oa\_ d1d7qa\_ d2ba0a1 d2vnud2 d2vnud3 d1khia2 d2qalq1  
d1wi5a1 d1xtda2 d1ny4a\_ d4w9ta\_ d1jvna1 d4x2ra1 d1qo2a\_ d4axka1  
d1thfd\_ d1h5ya\_ d4u28a\_ d2y88a\_ d4wd0a\_ d1vzwa1 d3ia2a\_ d4dgqa1  
d1hkha\_ d1zoia\_ d1ux8a\_ d1dlya\_ d4i0va\_ d2bkma\_ d1dlwa\_ d2bmma\_  
d2r80b\_ d1cqxa1 d1cg5a\_ d1gcvb\_ d3boma\_ d2h8fb\_ d2raoa\_ d3bj1a\_  
d4hrrb\_ d2r50a\_ d3d1kb\_ d2aa1b1 d3zhwa\_ d3hf4b\_ d3gdja\_ d1jebb\_  
d3bj1b\_ d1x9fb\_ d1wmub\_ d1gcva\_ d3bcqb\_ d3d4xb\_ d1gvha1 d2dc3a\_  
d3hf4a\_ d4yu3a\_ d3k8ba\_ d1qpwb\_ d2r80a\_ d3bcqa\_ d1v4wa\_ d3wtgb\_  
d1j17a\_ d4esaa\_ d1a9we\_ d3d1ab\_ d1fsla\_ d4h21a\_ d1v4wb\_ d1mwca\_  
d1vhba\_ d1jeba\_ d1spgb\_ d1h97a\_ d1q1fa\_ d1tu9a1 d3d1aa\_ d1hdsb\_  
d3hyub\_ d2zfbb\_ d3fs4a\_ d1oj6a\_ d1shrb\_ d4h21b\_ d4yu3b\_ d1spga\_  
d3hrwa\_ d3qqra\_ d3at5a\_ d4wchd\_ d3hyua\_ d1cg5b\_ d1uc3a\_ d1hbra\_  
d2raob\_ d1outb\_ d4esab\_ d3gdjb\_ d3qqqa\_ d1x9fc\_ d3vrfa\_ d1litha\_  
d3mkba\_ d3d4xa\_ d3mjpa\_ d1j16a\_ d3fh9a\_ d1outa\_ d2dc3b\_ d1it2a\_  
d3eoka\_ d3g46a\_ d1qpwa\_ d3vrfb\_ d1ch4a\_ d1x9fd\_ d1hdsa\_ d2zfba\_  
d3mkbbb\_ d1or4a\_ d3wtga\_ d1a4fa\_ d3fh9b\_ d3bomb\_ d3cy5a\_ d3at5b\_  
d1x9fa\_ d2oifa\_ d4lmbx\_ d1cpcb\_ d3v57a\_ d1kn1a\_ d1cpca\_ d4f0ta\_  
d2vjha\_ d4po5b\_ d1eyxa\_ d1alla\_ d4f0tb\_ d1b33b\_ d1b8db\_ d4h0mb\_  
d1b33a\_ d2vjhb\_ d4lmb6\_ d2vmlb\_ d1allb\_ d2vjta\_ d3dbja\_ d2vmla\_  
d2vjtb\_ d4f0ub\_ d1f99b\_ d4rmpa1 d1liaa\_ d1eyxb\_ d2uulb\_ d4lmsb\_  
d4f0ua\_ d2bv8a\_ d1f99a\_ d2bv8b\_ d2c71b\_ d3dbjb\_ d4rmpb1 d1b8da\_  
d4h0ma\_ d3v57b\_ d1kn1b\_ d1liab\_ d2uula\_ d2j96a\_ d2qked\_ d4ksoa\_

d1t4za1 d1wwja\_ d2xqfa\_ d1ea5a\_ d1f6wa\_ d1dx4a\_ d1k4ya\_ d4qwwa\_  
d2ha2a\_ d3c8da2 d2pbla1 d1jkma\_ d1jjia\_ d1lzla\_ d2i49a\_ d1nnfa\_  
d1xvxa\_ d1ursa\_ d1h3da1 d1iuda\_ d4m1va1 d1twya\_ d3e13x\_ d2nxoa1  
d4pfua\_ d3ttma\_ d1elja\_ d2qmwa1 d1us5a\_ d1y3na1 d1jeta\_ d1uqwa\_  
d4f19a1 d2esna2 d3thia\_ d3fasa1 d2uyeb\_ d2xwva1 d1r9la\_ d2fyia1  
d2ozza1 d1sw5a\_ d1nh8a1 d1vr5a1 d2g29a\_ d1xs5a\_ d3lswa\_ d2z23a\_  
d3w9va\_ d3tcha\_ d1q35a\_ d1z7me1 d3q27a\_ d1p99a\_ d1ve4a1 d2i6ea1  
d4mcoa1 d4n8ya\_ d1eu8a\_ d1zbma1 d1hsla\_ d1ixca2 d1j1na\_ d1xvya\_  
d1y9ua\_ d2z22a1 d1xoca1 d4oera\_ d1wdna\_ d5f1qa1 d1xt8a1 d1i6aa\_  
d4gwoa\_ d4igta1 d1pc3a\_ d4mmpa1 d1o63a\_ d2czla1 d2onsa2 d4mija1  
d2qvba\_ d2v9za\_ d4kafa1 d1s5ja2 d1qhta2 d4dlea2 d1tgoa2 d3py8a2  
d1q8ia2 d1kfsa2 d2py5a2 d1d5aa2 d1f74a\_ d3l21a\_ d2e1da\_ d1to3a1  
d1w3ia\_ d1sfla\_ d1n7ka\_ d1vcva1 d4imea\_ d1wa3a\_ d2ocza1 d1f2ja\_  
d3m16a\_ d2yxga\_ d1ub3a\_ d3a5fa\_ d1fbaa\_ d1l6wa\_ d1xfba1 d1wx0a1  
d1vpxa1 d1ojxa\_ d1mxsa\_ d2a4aa1 d1xkya1 d3cq0a1 d3s1xa\_ d1f05a\_  
d1fdja\_ d3cpra1 d4d2ja\_ d4mh8a\_ d4i7ga1 d3rp2a\_ glucy.1 d1fuja\_  
d2zchp\_ d3w94a\_ d1si5h\_ d1lo6a\_ g2pka.1 d1cgha\_ d1kigh\_ d1a5ia\_  
d3s9ba\_ d1hj8a\_ d1ao5a\_ d2anya\_ d1q3xa1 d1gvza\_ d1azza\_ d4gsoa\_  
d2f91a1 d1iaua\_ d1gdna\_ d1eufa\_ g1fiw.1 d1eq9a\_ d4nfea\_ d2rdla\_  
d1spja\_ d1elva1 d1a7sa\_ d1ekbb\_ d1pfxc\_ d1yc0a\_ d2aiqa\_ g1fiz.1  
d1fi8a\_ d4k60a\_ d4dgja\_ d1mzaa\_ d1lop0a\_ d3tjva\_ d1pytd\_ d1sgfg\_  
g1gg6.1 d2eeka\_ g1rtf.1 d1a0ja\_ d3g01a\_ d1pytc\_ d4e7na\_ d1ddja\_  
d1z8ga1 d2hlca\_ d1npma\_ g1jou.1 d1sgfa\_ d1autc\_ g2hnt.1 g1kdq.1  
d1orfa\_ d3s69a\_ d4crga\_ d1fxya\_ d1bqya\_ d1svpa\_ d1mbma\_ d3su6a1  
d1cula1 d4agka\_ d1vcpa\_ d1q31a\_ g1n11.1 d3e90b\_ d1ep5a\_ d3u1jb\_  
d2bk7a\_ d3fjua\_ d1z5ra1 d1kwma1 d1uwya2 d1jqga1 d2c1ca1 d1dtda\_  
d1h8la2 d3lgia\_ d3i77a\_ d2z9ia2 d4nsva\_ d1lcya2 d4jcna\_ d1agja\_  
d1os8a\_ d1p3ca\_ d1l1ja\_ d1qtfa\_ d1e69a\_ d1mv5a\_ d3g60a4 g1ii8.1  
d1ewqa2 d1ji0a\_ d1qhla\_ d1v43a3 d2wmfa1 d1vpla\_ d4a82a2 g1f2t.1  
d2d62a1 d3tuic1 d2bbsa1 d3g60a3 d2ixea\_ d1g6ha\_ d1sgwa1 d2qi9c\_  
d3r1fa1 d3b60a1 d3d31a2 d2pzea1 g1xew.1 d1jj7a\_ d1loxxk2 d2onka1  
d1w1wa\_ d1iwea\_ d1qf5a\_ d1vmaa2 d1nija1 d1np6a\_ d2p67a1 d3ihla\_  
d1okkd2 d1ls1a2 d1s1ma2 d1liona\_ d2v40a\_ d1dj3a\_ d3hida\_ d2vola1  
d2g0ta1 d1vcoa2 d1j8mf2 d1xjca\_ d1p9ba\_ d1qzxa3 d1ihua2 d1ihua1  
d2qm8a\_ d1dj2a\_ d4ioja\_ d1cp2a\_ d1yrba2 d1hyqa\_ d3gqba2 d1skye3  
d1xp8a1 d1tf7a2 d1tf7a1 d1ye8a1 d1skyb3 d2qe7d2 d4blta\_ d4huta\_  
d3l1daa2 d4hyya\_ d2i3ba1 d1cr1a\_ d3j9tb2 d3ntua2 d1vdza1 d2z43a\_  
d1e9ra\_ d1nlfa\_ d3ziaa2 d1n0wa\_ d1g6oa\_ d3ziad2 d3j9ta2 d1pzna2  
d3gqbb2 d1gkub1 d1gkub2 d4ok5a1 d2bmfa1 d2bmfa2 d1yksa1 d1yksa2  
d1jr6a\_ d2qeqa1 d2j1qa1 d1a1va2 d1eh3a\_ d3skpa\_ d1dtza1 d1dtza2  
d1lieja\_ d1jnfa2 d1ce2a1 d1jnfa1 d1b1xa2 d1b1xa1 d1jw1a1 d1jw1a2  
d1ryoa\_ d1h76a1 d1h76a2 d1c4oa1 d2p6ra3 d2p6ra4 d1oywa2 d1oywa3  
d1wrba1 d1w36b2 d1w36b1 d1c4oa2 d3bora\_ d1t6na\_ d2eyqa5 d2eyqa3  
d2eyqa2 d2zu6a2 d1veca\_ d1uaaa1 d1w36d1 d2g9na1 d1z3ix2 d2rb4a\_

d1hv8a1 d1hv8a2 d1t5ia\_ d1w36c2 d2j0sa2 d2j0sa1 d1fuka\_ d3hjha1  
d1z5za1 d1qdea\_ d1z63a1 d1s2ma2 d1s2ma1 d1wp9a1 d1wp9a2 d1gm5a3  
d1gm5a4 d3dina4 d3dina3 d1q0ua\_ d1w36c1 d1z3ix1 d1nкта3 d1nкта4  
d1uaaaa2 d1w36d2 g1qhh.1 d2fwra2 d2fwra1 d3q3ma\_ d1za0a1 d1mxra\_  
d2inca\_ d1jk0a\_ d2incb\_ d1mhyb\_ d3hf1b\_ d1mtyb\_ d1r2fa\_ d2uw1a\_  
d1mhyd\_ d3n37a\_ d1afra\_ d1oquc\_ d1syya\_ d2o1za\_ d1uzra\_ d1smsa\_  
d2fkza\_ d1zujal d1s3qa1 d2fjca1 d1z6om1 d1veia\_ d4dyya\_ d1jiga\_  
d3gvya\_ d2pyba\_ d4cy9a1 d3bvfa1 d1r03a\_ d2cf7a\_ d1nf4a\_ d1zs3a1  
d4iwka\_ d3ka8a\_ d3np0x\_ d1n1qa\_ d11b3a\_ d4e6ka\_ d1z6oa1 d2fzfa1  
d4dyua\_ d3ge4a\_ d4am4a\_ d2z6ma\_ d1ji5a\_ d1vlga\_ d1lkoa1 d1krqa\_  
d3qz3a\_ d1o9ra\_ d2ffxj\_ d1euma\_ d1yv1a1 d2v2pa\_ d1j30a\_ d4di0a\_  
d1dpsa\_ d1oewa\_ d2qzxa\_ d2asia\_ d1psoe\_ d1miqa\_ d1smra\_ d2h6ta\_  
d1pfza\_ d1lizda\_ d3hd8a\_ d1j71a\_ d1dpja\_ d4aa9a\_ d1t6ex\_ g1b5f.1  
g1lya.1 g1htr.1 d1qdma2 d1bxoa\_ d1wkra\_ d1tzsa\_ d1libqa\_ d2qzwa\_  
d1ex4a2 d1c6va\_ d2v76a\_ d1wj1a1 d1aqca\_ d1qqga2 d1qqga1 d1ntva\_  
d1n3ha\_ d4dbba\_ d3f0wa1 d1p3ra\_ d1wgua1 d2cy4a1 d3hqca\_ d1wvha1  
d1xr0b1 d1bdqa\_ d3ggta\_ d3ixoa\_ d1mrxa\_ d2haha\_ d1tw7a\_ d4njsa\_  
d1sgua\_ d2p3da\_ d1nsoa\_ d3d3ta\_ d2rkfa\_ d1c6ya\_ d2rspa\_ d3ogpa\_  
d3ekwa\_ d2o4na\_ d2j9ja\_ d1baia\_ d3ggua\_ d3lzua\_ d4npua\_ d4j55a\_  
d2r8na\_ d2fxda\_ d2p3ca\_ d4dqea\_ d3ttpa\_ d3t3ca\_ d2p3aa\_ d2hc0a\_  
d2fdda\_ d3mwsa\_ d1k8rb\_ d1wgra1 d1ef5a\_ d1wfyal d1e8ya3 d1wgyal  
d1lfda\_ d2cs4a1 d1wxma1 d2byea1 d3kh0a1 d2byfa1 d1wxaa1 d1e7ua3  
d1wgda1 d1wggal d4q5eb\_ d1wjna1 d1se9a\_ d3n3kb\_ d1wz0a1 d1we6a1  
d2m0xa\_ d2gbka\_ d3rt3b1 d1wh3a1 d1sifa\_ d2ekek2 d4ii2b1 d4hk2a1  
d1c3ta\_ d1m94a\_ d1wgha1 d1ttna1 d1j8ca\_ d1wx8a1 d3v6cb1 d2ma9b\_  
d4i61b1 d1bt0a\_ d2jvca1 d1iyfa\_ d2k1fa\_ d1wxva1 d1wf9a1 d1t0ya\_  
d2io0b2 d1x1ma1 d2gbma\_ d1zw7a1 d2m17a\_ d1ud7a\_ d1we7a1 d21wpa\_  
d2gbja\_ d1wjua1 d1v6ea1 d1v86a1 d4eewa\_ d1wiaa1 d4icva\_ d4gu2a\_  
d1wx7a1 d1wy8a1 d4hjka1 d2faza1 d1v5oa1 d2a13a1 d2cr5a1 d1wj4a1  
d1s3sg\_ d3ubra\_ d1qo8a1 d1d4ca1 d2k3va\_ d1ft5a\_ d1qdba\_ d1m1qa\_  
d2j7aa\_ d1h21a\_ d1ogyb\_ d4fasa\_ d1jnia\_ d1oaha\_ d1sp3a\_ d2h0ba\_  
d2erfa\_ d1h30a1 d3mw4a1 d1pz7a\_ d2r1ba\_ d3v64a1 d1d2sa\_ d3bopa1  
d3mw3a1 d1okqa1 d1okqa2 d2bcgg1 d2bcgg2 d1wioa4 d1ccza2 d1vcaa1  
d1dr9a2 d2d9qb1 d2nxyb2 d1um8a\_ d1ixza\_ d1qvra2 d1qvra3 d1sxjc2  
d1jr3d2 d2p65a\_ d118qa2 d1g8pa\_ d3hu3a3 d1sxjd2 d1njfa\_ d1in4a2  
d1sxja2 d1tuea1 d2ce7a2 d1w5sa2 d1sxjb2 d1d2na\_ d1ny5a2 d1ofha\_  
d2gnoa2 d2a5yb3 d1fnaa2 d1u0ja1 d11v7a\_ d1iqpa2 d2fnaa2 d1ixsb2  
d4gita\_ d1sxje2 d1g41a\_ d2e3fa\_ d1mm0a\_ d2e3ea\_ d21lda\_ d2ny8x\_  
d2e3ga\_ d2ny9x\_ d2nz3a\_ d21j7a\_ d1n4na\_ d2m8bb1 d2kyqa\_ d3psma\_  
d1jkza\_ d1jxca\_ d2g11a\_ d1ugla\_ d4uj0a\_ d2k4ua\_ d1hp2a\_ d21u9a\_  
d1baha\_ d2meoa1 d1wm7a\_ d1hlya\_ d1n8ma\_ d1jlza\_ d1wpda\_ d1c55a\_  
d1pvza\_ d1wt7a\_ d1rjia\_ d1wz5a\_ d1m2sa\_ d1pjva\_ d1c49a\_ d1qkya\_  
d2ktca1 d1wmta\_ d1du9a\_ d1j5ja\_ d1r1ga\_ d1t0za\_ d2i61a\_ d1t1ta\_  
d1sn4a\_ d1kv0a\_ d21kba\_ d1npia\_ d1wwna\_ d1pe4a\_ d2kbka\_ d21i7a\_

d1djta\_ d2kbha\_ d1dq7a\_ d1sega\_ d1omya\_ d1zywa1 d1jzaa\_ d1n9wa1  
d1bbua1 d1c0aa1 d1b8aa1 d1l0wa1 d3a74a1 d1eova1 d1iyjb4 d1iyjb5  
d1iyjb3 d1o7ia\_ d4ipca1 d1x3ea\_ d4apva\_ d1jb7a1 d1jb7a2 d1jb7a3  
d3kdfa\_ d1ue1b\_ d1wjja1 d3eiva\_ d1xjva2 d1xjva1 d2ccza2 d1se8a\_  
d1l1oc\_ d1jb7b\_ d1qvca\_ d3ulla\_ d1qzga\_ d1miua4 d1miua5 d1miua3  
d3g48a1 d1gd7a\_ d1mkha\_ d1jjcb3 d1pyba\_ d3ubub\_ d1legia\_ d1qo3c\_  
d1v7pa\_ d1tdqb\_ d3ubua\_ d1c3ab\_ d1h8ua\_ d3bx4b\_ d1t8ca1 d1sb2a1  
d1qdda\_ d2ziba1 d3cada\_ d1byfa\_ d1j34b\_ d1jwia\_ d1jzna\_ d1c3aa\_  
d1oz7b\_ d1wmza\_ d3bdwb\_ d1hq8a\_ d1fifa1 d1dv8a\_ d3hupa\_ d1wk1a1  
d2afpa\_ d3bx4a\_ d1gz2a\_ d1sl6a\_ d1v7pb\_ d3g8ka\_ d1ixxa\_ d1j34a\_  
d1jwib\_ d1g1sa1 d1y17a1 d1ja3a\_ d1fvub\_ d3bdwa\_ d1sb2b1 d1fvua\_  
d1umrc\_ d1oz7a\_ d4m17a\_ d3cfwa1 d1ypqa1 d1g1ta1 d3fd4a\_ d3l9jc\_  
d4dn8a1 d1v4lb\_ d1rdl1\_ d2msba\_ d2a1ka\_ d1je5a\_ d1rpma\_ d2shpa1  
d1yfoa\_ d1l8ka\_ d2ooqa1 d1g4us2 d1p15a\_ d1lara2 d1wcha\_ d2fh7a2  
d2fh7a1 d1ohea1 d1ohea2 d2f4da\_ d1rxda\_ d2hxpa\_ d1xria\_ d1d5ra2  
d1fpza\_ d3ezza\_ d4y2ea\_ d3azya\_ d3wvja\_ d1upsa1 d1ajoa\_ d2hyka\_  
d1ajka\_ d2vy0a\_ d1o4ya\_ d3o5sa\_ d3d6ea\_ d3atga\_ d1dypa\_ d1umza\_  
d3i4ia\_ d1tdha3 d1q3ba3 d1ee8a3 d1k82a3 g1qmo.1 g1len.1 d3zyra\_  
d1fnya\_ d1n47a\_ g21tn.1 d1avba\_ d3usua\_ d1dhkb\_ d1f9ka\_ d1lukga\_  
d1g8wa\_ d1g9fa\_ d1wbfa\_ d3wcsa\_ d1g7ya\_ g1loe.1 d1mvqa\_ d1hq1a\_  
d1v6ia\_ d1dbna\_ d1qnwa\_ d1fx5a\_ d4l8qa\_ d1ioaa\_ d3n35a\_ d1epwa1  
d3h33a\_ d1rwja\_ d19hca\_ d1os6a\_ d3bxua\_ d3h4na\_ d1i77a\_ d3caoa\_  
d1j0pa\_ d2ctha\_ d1ofwa\_ d2e84a\_ d1hh5a\_ d1gyoa\_ d3h34a\_ d1dszb\_  
d1a6ya\_ d3cbba\_ d1ynwa1 d1r4ia\_ d1hcqa\_ d2hana\_ d2hanb\_ d2enva1  
d1kb4b\_ d2n1lb\_ d1l01a\_ d1cita\_ d1adqa1 d1fnga1 d1uvqb1 d1zs8a1  
d2vola1 d2vola2 d1mfb12 d2jelh2 d1uwe12 d3qq4b1 d1kjvb\_ d1k5na1  
d1osph2 d4odh12 d1ow0a1 d1ow0a2 d1bfob2 d3l9ra2 d3jtth1 d2fath2  
d4elkb2 d1fn4b2 d2xfxb\_ d1pg7x2 d1cqka\_ d4k71b2 d1lk2a1 d1leapb2  
d4lfhg2 d1i4fa1 d2nw2a2 d1kfah2 d1mhca1 d1h3ua1 d1wejh2 d1h0db2  
d1a5fh2 d1kcvh2 d1mjuh2 d1qqda1 d1kcrh2 d1k8ia1 d3huja2 d2nnab1  
d1nfd2 d3mffb2 d1s9va1 d1lk3h2 d1q0x12 d1fv1b1 d1neza1 d4rfeb2  
d1r3ha1 d1a6tb2 d1kjva1 d1pz5b2 d1onqa1 d2bc4a2 d1de4a1 d1k8da1  
d1tcra2 d1dn0b2 d1nfd2 d2xwtb2 d1bfoa2 d1mexh2 d1iakb1 d1ypzf2  
d4f7ea2 d1q7212 d2fbjh2 d1fe8h2 d1clzh2 d1fngb1 d1uvqa1 d1vgka1  
d1c16a1 d4j12a2 d4x99b2 d1igtb3 d1je6a1 d1q72h2 d1nldh2 d1teth2  
d2hmic2 d1i1ca2 d1i1ca1 d1k8ib1 d1q0yh2 d1kfa12 d3frua1 d1pg7w2  
d1u58a1 d1igyb4 d1igyb3 d1hyrc1 d1klub1 d1deeb2 d1c12b2 d2bc4b2  
d2ig2h2 d1kcv12 d3wn5b1 d1lk2b\_ d1lk312 d1mjul2 d1sm3h2 d1q0xh2  
d1zvsal d1ydpal d1u8ib2 d1ypze2 d1kcuh2 d1op9a\_ d1y01a1 d1letzb1  
d1legj11 d2gsib1 d1nj9a1 d4jfhd1 d1aql11 d1t2ja\_ d1l04h1 d1zvyal  
d3v4v11 d4enec1 d1kxtb\_ d5e8ea1 d2pxya\_ d4weud\_ d1xiwc\_ d2esvd1  
d1qnzh\_ d1ogae1 d1f4xh1 d4n1hb\_ d3ezjb1 d3mlw11 d1kfah1 d1letza1  
d1b4jh1 d3cfic\_ d4w68a\_ d2arja1 d1ek3a\_ d2ok011 d1vera\_ d1uwgh1  
d1blnb1 d1fpth1 d1rzga1 d2giya1 d4m3kb1 d1nc2a1 d2nyyd1 d1ncna\_

d1fbih1 d5dxwa\_ d4fqqa1 d1dqdh1 d1jfq11 d1kelh1 d1faih1 d1frgl1  
d1figl1 d4m6n11 d1fo0a\_ d4hxb11 d3b5ga\_ d3quyd1 d2h9gb1 d1i8kb\_  
d2dd8h1 d2ck0h1 d1eaja\_ d4w6wb1 d2a6ib3 d1t66d1 d2e27h\_ d1ob1b1  
d1f11b1 d2v7na1 d1ad0a1 d2xt1b1 d1pskh1 d4i13b1 d2op411 d1a0q11  
d1uwell d1za3a1 d1ncb11 d4uu9a\_ d1bm3h1 d1cloh1 d1nqba2 d1cf8h1  
d4y5va\_ d1mhph1 d5anma1 d4cdgc1 d4ldeb\_ d1y01b1 d2pcpb1 d1z3gl1  
d1dfb11 d1fh5h1 d3g5xa1 d1tzib1 d4dn311 d3zhka1 d2b1hh1 d2uy1a1  
d1f3dh1 d1nj9b1 d2agjh1 d2h1p11 d1q72h1 d8fabb1 d1ndmb1 d1rjca1  
d4u6hb1 d3upca\_ d2fbj11 d1osph1 d1tvda\_ d2cjh\_ d4fhbd1 d1bd2d1  
d1rz7h1 d3nn8a\_ d1knoa1 d1nfda1 d2bmkb1 d1dq11\_ d1igyb1 d1igfl1  
d12e8h1 d3utza1 d1nc2b1 d1rihh1 d4mwfb1 d4jvpa1 d1mieh1 d1rhfa1  
d1fgn11 d1sbs11 d1lp9e1 d1dn0a1 d4lqf11 d1iaih1 d1kgcd1 d1mh5b1  
d1gpo11 d2g60h3 d1f8t11 d2jixd1 d4grwh\_ d1fo0b\_ d1bfob1 d1axsa1  
d1u9ka\_ d1nmbh\_ d1h8na1 d1h8na2 d1jguh1 d4eura1 d3sdy11 d35c8h1  
d1w7211 d1mvub\_ d1i9rh1 d1ob1a1 d4wenb\_ d1yeeh1 d3ietc1 d1f58h1  
d1ad0b1 d1mqk1\_ d1nbvh1 d4b50a\_ d3r8bb\_ d1baf11 d1mamh1 d4rgne1  
d2gsgb\_ d35c811 d1bafh1 d1aih1 d2pcpa1 d2fath1 d2x1pa\_ d1orsb1  
d1ibg11 d1shma\_ d1a2yb\_ d1u0qa\_ d2coqa\_ d1hilb1 d1qfwi\_ d1jv5b\_  
d1fn4b1 d5e0qa\_ d1nsnh1 d1plgl1 d4ocx11 d1kb5h1 d1rzfh1 d1pg7x1  
d2fx7h1 d2oi9c\_ d117i11 d3eyva1 d1d5i11 d4ffyl\_ d1tet11 d1a6wh\_  
d1ac6a\_ d3dvfa\_ d1nfde1 d1mimh1 d1ri8a1 d1jhlh\_ d3dura\_ d1fskb1  
d1f97a1 d3so3b1 d2ak4d1 d1lp9f1 d4z7wf1 d117th1 d4y5ya\_ d4x7ec1  
d1emth1 d1ikfl1 d1nlbh1 d4uta11 d1bjma1 d1eapb1 d1u6ah1 d2dtgd1  
d1kj2b\_ d1xeda1 d1cleh1 d1fgvh\_ d2bnub1 d2fb4h1 d2dtgb1 d1ktrh\_  
d1jpth1 d1qkz11 d4hepg\_ d2atpb1 d1flrh1 d2hrp11 d1mvfa\_ d1iaim1  
d3k80a1 d2jb5h1 d3zkxc\_ d4grwe\_ d1it9h1 d1rhhb1 d3w9ec\_ d1e4wh1  
d1sy6h1 d2j6eh1 d3qxta\_ d1jglh1 d1p7ka1 d1tzhb1 d4n8pa1 d1gaf11  
d2jelh1 d1wioa2 d4i0cc1 d1cicb1 d1lmka2 d1lmka1 d1iqwh1 d1lorqb1  
d1ejoh1 d1jnlh1 d4zg1a\_ d43c9b\_ d1ggbl1 d1wejh1 d3q6fa1 d1f3dj1  
d3c61a1 d1bqlh1 d3p9wb\_ d1a3r11 d1h0db1 d2uzi1\_ d1eo811 d1qfw1\_  
d1n7m11 d1igja1 d1c5ch1 d2a9mh\_ d1rmfh1 d1fj1b1 d4heme\_ d1ccza1  
d1a5fh1 d1ogad1 d1dlfh\_ d1qa9b\_ d1vgel1 d3qskb\_ d1sjxa\_ d4ozfg1  
d1sq2n\_ d1qd0a\_ d1kcvh1 d1c5db1 d3qcull1 d8faba1 d3bn9d1 d1mjuh1  
d4y8dc\_ d7fabh1 d3dvgb1 d1lo011 d1a6tb1 d1gigh1 d1kcrh1 d2hwz11  
d1yjdc1 d3clfl1 d4krna\_ d1d171\_ d1e6o11 d1mexh1 d3r0ma\_ d4kkna\_  
d1fns11 d1oaqh\_ d1rzia1 d1lucbh1 d1ncw11 d4b41a\_ d1nfdfl1 d2mpah1  
d2d7t11 d4grwf\_ d4b5ea\_ d11k3h1 d3u79a\_ d4u3xa\_ d1ghfl1 d1bvkb\_  
d1mcww1 d1b88a\_ d1jrhh1 d32c2b1 d4wemb\_ d1dsfh\_ d1op3h1 d1ce111  
d1iqda1 d1qoka1 d1qoka2 d1qfuh1 d2crya1 d1ay1h1 d1oaql\_ d3ab0b\_  
d1rur11 d1t4kb1 d1bz7b1 d1n0xh1 d1for11 d1lucb11 d4w6yb\_ d43c9a\_  
d2aabl1 d1tzia1 d4n1ca\_ d1k6qh1 d3g9ab\_ d4tvsa1 d1ligmh\_ d1pz5b1  
d3dx9a1 d3wxwh\_ d1nakh1 d1kcul1 d3eaka\_ d4qlra1 d1cr911 d1d9ka\_  
d1f4x11 d1deea1 d2i27n2 d1c12a1 d2orb11 d1j8hd1 d1mcp11 d1c5da1  
d1kenh1 d1bd2e1 d1h5ba\_ d4x7fc1 d3upaa\_ d1t3fa1 d1indh1 d2dtgc1

d4hc1l1 d1zv5a1 d4wgvb\_ d1uwgl1 d4f37k1 d1aqkh1 d1vesa\_ d3zkqd\_  
d1fptl1 d1lo4l1 d1knob1 d3rrqa\_ d1ct8b1 d4orz\_ d1mlbb1 d4hgkc1  
d1dqdl1 d1bogb1 d4ozhe1 d1dr9a1 d1i7za1 d1dn0b1 d1kell1 d1rzib1  
d1ypzf1 d1wtla\_ d1hkfa\_ d1fail1 d1figh1 d2vyre\_ d1sjva\_ d1ohqa\_  
d1bfoa1 d1pkqb1 d1mjul1 d1b4jl1 d1nsn1 d2arjb1 d1p4bh\_ d4aj0a\_  
d3nn8b\_ d2rcja1 d1f2xk\_ d4v1dd\_ d1adqh1 d2eksa\_ d4k3ga\_ d1jfqh1  
d1uweh1 d1frgh1 d4gftb\_ d1uz8b1 d4n1ea\_ d1bm3l1 d1clol1 d3mcka1  
d2vq1a1 d1ae6h1 d4aq1b1 d1uj3b1 d1nbqa1 d1fh5l1 d2ck0l1 d2ywza\_  
d1q72l1 d4nxbx\_ d1hila1 d4hzl1 d2j88l1 d1zmya1 d1cd0a\_ d1a4ka1  
d1pskl1 d1a0qh1 d4krmb\_ d1ncbh1 d2fbjh1 d1j8he1 d1i3ua\_ d1cf8l1  
d1fe8h1 d2p1ya1 d1eeqa\_ d2x89a\_ d1ol0a\_ d2r0lh1 d1ub5a1 d1dfbh1  
d3eyvb1 d4jdvb1 d4p2cg\_ d2gsia1 d2agjl1 d1u3ha1 d2h1ph1 d1rihl1  
d1fskc1 d1boga1 d2a77l1 d1ospl1 d1qfoa\_ d3dwta\_ d2fx7l1 d1rz7l1  
d3stba1 d1pkqa1 d1b6da1 d1dzba2 d1dzba1 d1kj2a\_ d4l1ha\_ d1rzgb1  
d1dq1h\_ d1e8l1 d1mie11 d1jmaa\_ d1sbs11 d1fgnh1 d1f58l1 d1mqkh\_  
d1ndgb1 d3qegl1 d1iail1 d2aw2a1 d1tqbc1 d3fo2a1 d4dkaa\_ d1f8th1  
d2g60l1 d2ywya\_ d1uj3a1 d1yc7a\_ d3bd3a\_ d4w6xb1 d1nmb1\_ d1i8ka\_  
d1rjlb1 d1ypze1 d1p7kb1 d1kxqe\_ d1gpoh1 d2z4qa1 d1w72h1 d1i9rl1  
d4qgya1 d4xt1c\_ d2qqnh1 d1cica1 d3c08h1 d2cd0a\_ d2bdnh1 d1hnga1  
d1mam11 d1nldh1 d1cr9h1 d4lcih1 d3bkyh1 d3qg7l1 d1ai1l1 d1kxvc\_  
d4iosd\_ d1l7ih1 d2x1qa\_ d1ub6b1 d3k74b\_ d1ibgh1 d1teth1 d1igya1  
d1hxma1 d2x6ma\_ d2e7la\_ d5e03a\_ d1qfwm\_ d2r0kh1 d1igjb1 d1rurh1  
d1plgh1 d1mj8h1 d1yuhb1 d3fmg11 d1rzfl1 d1emtl1 d1ad9b1 d1igtb1  
d1nlb11 d1d5ih1 d3k7ua\_ d4ffyh\_ d1bwwa\_ d3dvga1 d1a6ta1 d1fgvl\_  
d4qxgl1 d1mim11 d1jhl1\_ d2hffb1 d2hh0l1 d1qkzh1 d1l7tl1 d1afvh1  
d1iaii1 d2cjuh\_ d1um5h1 d2ghwb2 d2ghwb1 d1kgce1 d2fgwh1 d1ikfh1  
d1dvfd\_ d2i24n1 d2xtjb\_ d1za3b1 d2ycla\_ d2hh0h1 d2x1oa\_ d1bvka\_  
d1rjla1 d5e7ba1 d1igta1 d1il1b1 d2fb4l1 d1mvua\_ d1jptl1 d32c2a1  
d1fvca\_ d1iqdb1 d2hrph1 d2p4ab\_ d4qola\_ d1p2cb1 d1wt5c\_ d1t4ka1  
d5c1mb\_ d1it9l1 d1bz7a1 d1b2wh1 d1e4wl1 d1jnl11 d1yedb1 d1za6b1  
d3u7aa\_ d1igfh1 d3gnml1 d1orsa1 d1wejl1 d1a2ya\_ d1hxmb1 d1gafh1  
d2j4wh1 d1pz5a1 d1j05a\_ d1a3rh1 d4fq1l1 d1qfwh\_ d1eo8h1 d1n7mh1  
d4s11a\_ d1kegh1 d5da4a\_ d1iqwl1 d3whxb1 d1vgeh1 d1deeb1 d1c12b1  
d1t2ql1 d1ad9a1 d3gsnb1 d3b2uc1 d1ggbh1 d1t3fb1 d1nakl1 d4ocmc\_  
d1lila1 d2v7hb3 d2esve1 d1mcoh1 d2qr0b1 d2q3aa\_ d1ct8a1 d1kcr11  
d2pxyb\_ d2uzih\_ d5c3ld\_ d3durb\_ d1c5cl1 d2ak4e1 d1d17h\_ d1xiwd\_  
d1mlba1 d1rmfl1 d1i7zb1 d1dlfl\_ d2xa3a\_ d5bq7b1 d1dqqb1 d3h42l1  
d1legjh1 d1kcvl1 d1fe8l1 d2j6e11 d1f3rb2 d1lk3l1 d1sm3h1 d1q0xh1  
d1ghfh1 d7fabl1 d1igch1 d1lo0h1 d4idla\_ d5c2b1\_ d1jrh11 d1lila1  
d3zhda1 d4kfzc\_ d1b0wa\_ d1e6oh1 d1mexl1 d4krpb\_ d1fnsh1 d1ncwh1  
d4hgma\_ d4eigb1 d4rzca\_ d2mpa11 d4y5xa\_ d5en2b1 d3lrga1 d4ej1c1  
d1rhha1 d1j05b\_ d1forh1 d1q9wb1 d2wzpd\_ d2aq2a1 d1h0da1 d3revb1  
d2ij0c1 d1tzha1 d4m7jl1 d1k6ql1 d3b9kc1 d1igml\_ d3qeau1 d1dsfl\_  
d1ce1h1 d1kcu11 d1zvha1 d1zvoa1 d1tqbb1 d1ay1l1 d2qsc11 d2cgrh1

d1n10h1 d1ken11 d3eo0a1 d4n9ob1 d1n0x11 d3k1kc\_ d2cqva1 d1fhga\_  
d2k1ma\_ d2d12a1 d1biha3 d1biha1 d1biha4 d3qp3a1 d1g1ca\_ d1gxea\_  
d1cvsc2 d1cvsc1 d1xmwa2 d1m4ka2 d2otpa2 d1biha2 d1rhfa2 d2fcba2  
d2fcba1 d1wwbx\_ d1gsma2 d1lepfa1 d1lepfa2 d2dava1 d1waaa\_ d1f97a2  
d1x44a1 d1vcaa2 d1fnla2 d1fnla1 d3b5ha2 d3h8na2 d3h8na1 d1bjba1  
d1bjba2 d1pd6a\_ d1f2qa2 d3cx2a\_ d1nbqa2 d3b5ha1 d1n26a1 d1xiwb\_  
d1xaua\_ d1fltx\_ d2ifga1 d1olla1 d1olla2 d1cs6a4 d1cs6a3 d1cs6a2  
d1cs6a1 d2gw5a2 d1sy6a1 d1xiwa\_ d1lucta2 d1lucta1 d1ry7b2 d1gl4b\_  
d1qz1a3 d1olza1 d2c9aa1 d1wwca\_ d2aq2b1 d1enfa1 d1i4pa1 d1v1oa1  
d1et9a1 d1esfa1 d2g9hd1 d4ohja1 d1klud1 d1bxta1 d1eu3a1 d1ty0a1  
d1fnua1 d1c4qa\_ d1prtcl d2wv6d\_ d1prtfl\_ d1ltrd\_ d4l63b1 d1r4pb\_  
d1prtd\_ d1tl0f\_ d2bosa\_ d1prtb1 d3chbd\_

**Family-73 (c.55.3.1)**

**Positive dataset contains 8 protein sequences.**

d1zbfal d2z1ha\_ d2etja1 d3qioa1 d2e4la\_ d2lsna1 d1uaxa\_ d2yv0x\_

**Negative dataset contains 4035 protein sequences.**

d1m32a\_ d1libja\_ d1c7na\_ d1iuga\_ d4q75a\_ d2bkwa1 d1t3ia\_ d1n8pa\_  
d1qz9a\_ d1jff9a\_ d1leg5a\_ d1p3wa\_ d3kgwa\_ d1cl1a\_ d2ctza1 d1vjoa\_  
d2rfva\_ d1gc0a\_ d1cs1a\_ d1d2fa\_ d2ch1a1 d1qgna\_ d1pffa\_ d1elua\_  
d1ax4a\_ d2v1pa1 d2ez1a\_ d1u08a\_ d1lc5a\_ d1b5pa\_ d2ay1a\_ d1bw0a\_  
d3pd6a\_ d7aata\_ d2csta\_ d1j32a\_ d1fg7a\_ d4wlha\_ d1o4sa\_ d1v2da\_  
d1gdea\_ d1m6sa\_ d1v72a1 d1svva\_ d1ajsa\_ d1wsta1 d2f8ja2 d1lk9a\_  
d1vp4a1 d1xi9a1 d2gb3a1 d4qmea2 d2xdt2a d1z5ha2 d1xkla\_ d2wfla\_  
d3rcha\_ d3k40a\_ d1pmma\_ d4nmwa\_ d1e57b\_ d1auyb\_ d1f56a\_ d1bypa\_  
d1azca\_ d1ws8a\_ d3u25a\_ d1cuoa\_ d1lid2a\_ d1rkra\_ d2iaac\_ d4dp1x\_  
d1nwpa\_ d2gima\_ d2i7sa\_ d1qhqa\_ d3ehbb1 d1fftb1 d1gyca3 d1hfua2  
d1kbva1 d1kbva2 d1sdda1 d1sdda2 d1gyca2 d1mzya1 d2bw4a1 d1laoza1  
d1laoza3 d1laoza2 d1kyaa2 d1kyaa3 d1kyaa1 d1mzya2 d4e9sa1 d1sddb1  
d1sddb2 d1hfua1 d1hfua3 d1oela2 d1oela1 d1v10a2 d1v10a3 d1v10a1  
g1f8v.1 d1novc\_ d2bbvc\_ d1s5ja2 d1qhta2 d4dlea2 d1tgoa2 d3py8a2  
d1q8ia2 d1kfsa2 d2py5a2 d1d5aa2 g1gk9.1 g1cp9.1 g1e3a.1 d1a3qa1  
d1iknc\_ d3brda1 d1p7h11 d1oy3c\_ d1imhc1 d1zk9a1 d2cxka1 d2bema\_  
d1pama1 d1ea9c1 d1qhoa1 d2fhfa2 d2fhfa1 d1k3ia1 d1j0ha1 d1csla1  
d2bhua1 d1edqa1 d1f1sa2 d1ut9a2 d1gvia1 d1txka1 d2phla1 d1fxza2  
d1fxza1 d1lrha\_ d1uija1 g1dgw.1 d2v09a\_ d1uika2 d1uika1 d1dgwa\_  
d1ep0a\_ d2pa7a1 d1wlta1 d1nxma\_ d2c0za1 d1ds6b\_ d1fstb\_ d1tafa\_  
d1bh9b\_ d1tafb\_ d1jfib\_ d1q9ca\_ d1h3ob\_ d2byka1 d1n1ja\_ d4g92b\_  
d1bh9a\_ d1h3oa\_ d2bykb1 d1n1jb\_ d1eixa\_ d3exra\_ d2ffca1 d2fdsa1  
d3n3ma1 d2czda\_ d2yyua\_ d1vqta1 d1dbta\_ d3ldva1 d1ydwa2 d2nvwa2  
d1h6da2 d1zh8a2 d1qkia2 d1xeaa2 d1tlta2 d1au7a2 d1ic8a2 d2ovga\_  
d1sq8a\_ d1rzsa\_ d3kz3a\_ d3orca\_ d3gpdg2 d2q49a2 d1hdgo2 d2g17a2  
d2cvoa2 d2czca1 d3pwka2 d1obfo2 d1i32a2 d1zyao2 d2pkqo2 d1b7go2  
d2hjsa2 d1cf2o2 d1vkna2 d1nvmb2 d1ux8a\_ d1dlya\_ d4i0va\_ d2bkma\_  
d2bmma\_ d2msya\_ d2djoa1 d2r5za\_ d1au7a1 d1f43a\_ d2lmda1 d1akhb\_



d1s7ea1 d3nara\_ d1zq3p1 d2craa1 d1mija\_ d4uuta\_ d3a01a\_ d1x58a1  
d3rkqa1 d3cmya1 d2cqxa1 d2da6a1 d1e3oc1 d1fjla\_ d1mh3a1 d1lg7a\_  
d1x41a1 d1wh7a1 d1gt0c1 d2mw8a\_ d1x2ma1 d1b72a\_ d1wi3a1 d1jgga\_  
d1wjha1 d1x2na1 d1mnmc\_ d2cuea1 d3k2aa\_ d2hosa\_ d2jwta2 d1pufa\_  
d1octc1 d2hi3a\_ d1b8ia\_ d4j19a\_ d3lnqa\_ d1wh5a1 d1b8ib\_ d1fexa\_  
d2cqra1 d1guua\_ d1ug2a1 d2cqqa1 d2ajea1 d4a69c\_ d1h8ac1 d2crga1  
d2iw5b1 d1xc5a1 d2cu7a1 d1wgxa1 d2cjja1 d2ckxa1 d1gvda\_ d1igna2  
d3lv8a\_ d1s3ga1 d1zaka1 d1s4qa\_ d3tvta2 d1uf9a\_ d1khta\_ d1ckea\_  
d1osna\_ d1p5zb\_ d4tmka\_ d3cm0a\_ d1tmka\_ d1jaga\_ d3h86a\_ d1t0hb\_  
d1nn5a\_ d2h92a\_ d3kb2a1 d2c95a1 d1yj5a2 d1kgda\_ d1ly1a\_ d2ak3a1  
d1vyva2 d1deka\_ d2grja1 d1p3ja1 d1y63a\_ d1e4ya1 d1s96a\_ d3iija1  
d1lvga\_ d1nksa\_ d1vyua2 d4e22a\_ d1qf9a\_ d1jjva\_ d1q3ta\_ d1ki9a\_  
d1lw7a2 d1teva\_ d1kjwa2 d1gsia\_ d1m7ga\_ d1x6va3 d1g3ma\_ d1j99a\_  
d1t8ta1 d1nsta\_ d1fmja\_ d1zrha\_ d1ls6a\_ d2a3ra\_ d1aqua\_ d2zptx\_  
d3ckla\_ d1texa\_ d1q44a\_ d2gwaha\_ d1z0ja1 d3umra2 d3gj0a1 d2gaoa1  
d1yzga1 d1x3sa1 d1g7sa4 d1puja\_ d1udxa2 d1kk1a3 d2o52a\_ d1jwyb\_  
d1zcaa2 d1zcba2 d2fv8a1 d2cjwa\_ d3dz8a1 d1xzpa2 d1vg8a\_ d4qxaa\_  
d2ew1a1 d1x1ra1 d2bcgy\_ d3doea1 d3cona\_ d3rega\_ d3wyga\_ d1upta\_  
d2b6ha1 d1zd9a1 d1lnza2 d1r5ba3 d1n0ua2 d1r2qa\_ d2f91a1 d2rhda\_  
d3q3jb\_ d3q85a\_ d1efma1 d1r8qa\_ d2gf9a1 d2akab1 d1ek0a\_ d1z08a1  
d2gcoa1 d2dy1a2 d4g01b\_ d2cxxa1 d1svia\_ d3q72a\_ d1ni3a1 d4ac9a4  
d2erxa1 d2bmea\_ d1wxqa1 d2gf0a1 d4ldja1 d1zunb3 d1d5ca\_ d4lv5b\_  
d1efca3 d1kmqa\_ d2g6ba1 d3lrpa\_ d1tada2 d2y8ea\_ d4rd4a1 d1z06a1  
d2heia\_ d3a58b\_ d1u01a2 d1d2ea3 d1zj6a1 d2ocba\_ d3rwoa\_ d1mr3f\_  
d2e9sa1 d4u5xa1 d2iwra\_ d2fn4a1 d3bwdd\_ d2nzja1 d2atva1 d2ksqa\_  
d3143a\_ d1mkya2 d1mkya1 d1wmsa\_ d1jnja3 d2rmka\_ d1f6ba\_ d1f60a3  
d1gota2 d1jala1 d2fh5b1 d1g16a\_ d2wblc\_ d1m7ba\_ d1wf3a1 d1f5na2  
d1t9ha2 d1z6xa1 d1z0aa1 d2fg5a1 d2a5ja1 d2bcjq2 d1ky3a\_ d4y0va\_  
d4lhwa\_ d2qmea1 d2atxa1 d1legaa1 d1ryha\_ d1moza\_ d1nrjb\_ d2erya1  
d3bfka\_ d1puia\_ d1fzqa\_ d3j3az1 d3t5ga\_ d1shza2 d3defa\_ d2f7sa1  
d3raba\_ d3tsoa\_ d3aq4a\_ d2a17a1 d3sfva1 d3bc1a\_ d2ncda\_ d1sdma\_  
d3h4sa1 d2heha\_ d2grya\_ g3kin.1 d1br2a2 d1goja\_ d1f9va\_ d2mysa2  
d1lkxa\_ d3t0qa\_ d4db1a1 d3gbja\_ d1ry6a\_ d1v8ka\_ d1kv9a1 d1jmx2  
d1jmx1 d1pbya2 d3vrda1 d3vrda2 d1fcdc2 d1h1oa2 d1h1oa1 d1m70a2  
d1m70a1 d1lg8a1 d1czan2 d1czan3 d1czan1 d1czan4 d1bg3a4 d1bg3a3  
d1bg3a2 d1bg3a1 d1nira1 d1qksa1 d3h1jd1 d1hroa\_ d4gedb\_ d3zooa\_  
d1mz4a\_ d1gu2a\_ d1f1fa\_ d1dvva\_ d1c6ra\_ d1c75a\_ d1e29a\_ d1gdva\_  
d1cnoa\_ d1h32b\_ d2bh4x\_ d2aiua\_ d5cytr\_ d1jdla\_ d1i8oa\_ d2zboa\_  
d3dmia\_ d1ls9a\_ d1wvec\_ d2yk3a\_ d3ph2b\_ d1dw0a\_ d5aura\_ d1ql3a\_  
d1qn2a\_ d1f1ca\_ d2nqya\_ d1h4ga\_ d1hixa\_ d1oa2a\_ d1olra\_ d3b7ma\_  
d4h7ma1 d3wp3a\_ d2vgda\_ d1ligoa\_ d3zsea\_ d2nlra\_ d3wx5a\_ d1oa3a\_  
d1pvxa\_ d1m4wa\_ d1f5ja\_ d1oa4a\_ d1ks5a\_ d4ix1a1 d3sita1 d1evsa\_  
d1cnt1\_ d1pvhb\_ d1z7ca\_ d1huwa\_ d1bgea\_ d1rhga\_ d1f6fa\_ d1f45b\_  
d1ilrb\_ d1axia\_ d1letea\_ d3tgxb\_ d1scfa\_ d2z3qa1 d3qbla\_ d1hula\_

d1m48a\_ d4nkqb\_ d1eera\_ d5e4ea\_ d2o27a\_ d3b5ka\_ d2psma1 d4zf7a\_  
d3uf5a\_ d4x51a\_ d1d9ca\_ d4ypgc1 d3oq3a\_ d1lqsl\_ d1n1fa\_ d1aula\_  
d1wu3i\_ d3bes1\_ d3ux9a\_ d4dnxa2 d1m8pa2 d1v47a2 d1jhda2 d1x6va2  
d3rbaa\_ d2qtra\_ d1nupa\_ d3l92a\_ d1f9aa\_ d1qjca\_ d2h29a\_ d1vlha\_  
d1od6a\_ d1lw7a1 d4ruka\_ d2e17a\_ d1iq0a2 d1irxa2 d1r6ta2 d1ivsa4  
d2cyba\_ d1rqga2 d1j09a2 d2yxna\_ d1f7ua2 d1ffya3 d2g36a1 d1nzja\_  
d1jila\_ d1n3la\_ d1i6la\_ d1pfva2 d1h3na3 d3n9ia\_ d3sz3a1 d2bk7a\_  
d3fjua\_ d1z5ra1 d1kwma1 d1uwya2 d1jqga1 d2c1ca1 d1dtda\_ d1h8la2  
d3sw2a\_ d1moxc\_ d1dx5i3 d1edmb\_ d1autl2 d1autl1 d1nqlb\_ d1dva11  
d1szba2 d1kigl\_ d2y5f1\_ d1ijqa2 d1gk5a\_ d1g1sa2 d1nt0a3 d1xdtr\_  
d1lmja2 d1lmja1 d1nzia2 d2wphe\_ d1klil\_ d1pfxl2 d1pfxl1 d1p9ja\_  
d1g1ta2 d1f7ea\_ d4yzub\_ d2mgpa1 d1b9wa1 d1b9wa2 d2mgpa2 d1ob1c1  
d1ob1c2 d1n1ia2 d1n1ia1 d2npra2 d2npra1 d1m1xb4 d1m1xb5 d1qx2a\_  
d1ig5a\_ d2y5ia\_ d1qlsa\_ d1psra\_ d3n22a\_ d2egda\_ d4ggfc\_ d2wcea\_  
d2luca\_ d4aqia\_ d3nsia\_ d2lp3a\_ d1j55a\_ d1a4pa\_ d1k8ua\_ d1nsha\_  
d1exra\_ d1tiza1 d1nyaa\_ d1g8ia\_ d1ggwa\_ d1wdcc\_ d3fwba\_ d1ggza\_  
d2o5ga\_ d1ctaa\_ d1m45a\_ d3i5gc\_ d1sl8a\_ d1fpwa\_ d2scpa\_ d2roaa\_  
d4aqra\_ d3pn7b\_ d1br1b\_ d2mysb\_ d1s6ca\_ d1bjfa\_ d2obha\_ d1jfka\_  
d1jf0a\_ d1qv0a\_ d1lkja\_ d2mlfc\_ d2m97a\_ d2d8na\_ d4by5a\_ d1jbaa\_  
d4nqga\_ d2mysc\_ d1j7qa\_ d1s6ia\_ d1uhka2 d1r2ua\_ d1dtla\_ d3kf9a\_  
d3pn7c\_ d1qjta\_ d1c07a\_ d1wkya2 d1uuqa\_ d3wh9a\_ d4mlra\_ d1xyza\_  
d4xuya\_ d2je8a5 d4bf7a1 d3cuia\_ d1ur4a\_ d1qw9a2 d1odza\_ d2vzsa5  
d1bqca\_ d2x2ya1 d1hjqa\_ d1qnra\_ d4y7ea1 d1vjza\_ d4k68a\_ d2v3ga\_  
d4hpga\_ d1nofa2 d1nq6a\_ d1h4pa\_ d1aq0a\_ d3ziza\_ d4bs0a\_ d1ecea\_  
d1h1na\_ d1ta3b\_ d1w91a2 d1ilwa\_ d1uhva2 d1us3a2 d1legza\_ d1tvna1  
d3nyda1 d1ghsa\_ d2cyga1 d4xv0a\_ d2c8na2 d1w32a\_ d3emca\_ d1v6ya1  
d1foba\_ d2uwfa1 d2fgla\_ d3niya1 d2c0ha1 d1rh9a1 d1yq2a5 d1szna2  
d1fa2a\_ d5do8a1 d1ea9c3 d1hx0a2 d2fhfa5 d1qhoa4 d1avaa2 d1m53a2  
d4m8ua1 d2gjpa2 d1lwha2 d4howa1 d1ktba2 d1j0ha3 d3vm5a1 d2x1ia\_  
d1wzaa2 d1uasa2 d2diea1 d1mxga2 d1ht6a2 d1eswa\_ d1iv8a2 d5cpsa\_  
d1ud2a2 d1zjaa1 d3gbea1 d1kwga2 d1wdpa\_ d1gcya2 d1g5aa2 d1hvxa2  
d3dhp2a2 d2bhua3 d4do4a1 d3qgva1 d1e43a2 d1g94a2 d2d3na2 d1gjwa2  
d1gvia3 d1x1na1 d1r7aa2 d1tz7a1 d4toqa\_ d1wb0a1 d1w9pa1 d1eoka\_  
d1itxa1 d1kfwa1 d1edqa2 d2gsja\_ d1hjxa1 d1jnda1 d1vf8a1 d3wdpp1  
d3wq5a\_ d4gxpa\_ d4hz8a\_ d1e4mm\_ d3aiua\_ d1wcga1 d1qvba\_ d3ahxa\_  
d1v02a\_ d2dgaa\_ d1pbga\_ d1vffa1 d1qoxa\_ d4ha4a\_ d1mixa2 d1e5wa2  
d1isna2 d2a16b2 d1x14a1 d1n9pa\_ d3vsqa\_ d2gixa1 d2v76a\_ d1wj1a1  
d1aqca\_ d1qqga2 d1qqga1 d1ntva\_ d1n3ha\_ d4dbba\_ d3f0wa1 d1p3ra\_  
d1wgua1 d2cy4a1 d3hqca\_ d1wvha1 d1xr0b1 d1wgqa1 d1v89a1 d2coda1  
d1zc3b\_ d1wg7a1 d1u5ea1 d1v61a1 d2coca1 d2ys1a1 d1v5pa1 d1ntya2  
d1wjma1 d1wila1 d1u29a\_ d1xx0a1 d1unqa\_ d2zkmx3 d1fhoa\_ d1v88a1  
d2adza1 d1x1fa1 d1p6sa\_ d2coaa1 d1btka\_ d1v5ma1 d1faoa\_ d2x18a\_  
d1dyna\_ d1x1ga1 d4kaxb\_ d2j59m1 d1ki1b2 d1xcga2 d1txda2 d1u5da1  
d1dbha2 d1wlha\_ d1upqa\_ d1v5ua1 d1foea2 d2fjla1 d1eaza\_ d2dfka2

d2cofa1 d1kz7a2 d9ldta1 d2ewda3 d1up7a1 d2dfda1 d1s6ya1 d1vjta1  
d7mdha1 d1hyea1 d1t2da1 d1ojsa3 d1b8pa1 d1ldna1 d1hyha1 d1civa1  
d2a92a1 d1ez4a1 d1i0za1 d1y6ja1 d1gv0a1 d1ur5a1 d1llda1 d1obba1  
d1v8ba1 d1gdha1 d1l7da1 d2dlda1 d1mx3a1 d1ygya1 d1qp8a1 d1j4aa1  
d2naca1 d1npya1 d3t4ea2 d1a4ia1 d1o0sa1 d2hk9a2 d2egga2 d1b26a1  
d1bvua1 d1gq2a1 d1c1da1 d1leha1 d1gtma1 d1euza1 d3dona2 d1ledza1  
d1gpja2 d1vi2a1 d1p77a1 d1nyta1 d1b0aa1 d1vl6a1 d1v9la1 d1txga2  
d3f47a1 d1mv8a2 d2pv7a2 d1xc2a3 d2ahra2 d4xiya1 d2f1ka2 d1pgja2  
d1i36a2 d1np3a2 d1lj8a4 d1teaa3 d1qmg2 d2i76a2 d2g5ca2 d1wdka3  
d1dlja2 d3cuma3 d1kola2 d1f8fa2 d1qora2 d1jqba2 d1vj0a2 d1gu7a2  
d1d1ta2 d1xa0a2 d2dm6a2 d1jvba2 d1rjwa2 d1llua2 d1h2ba2 d1tt7a2  
d1piwa2 d1o89a2 d1iz0a2 d1e3ja2 d1yb5a2 d1uufa2 d1vj1a2 d1e3ia2  
d3gpdg1 d1vc2a1 d2nvwa1 d1u8fo1 d1ydw1 d1hdgo1 d2g17a1 d2czca2  
d1r0ka2 d1obfo1 d2cvoa1 d1ebfa1 d1h6da1 d1i32a1 d1zh8a1 d2q49a1  
d1qkia1 d1j5pa4 d3pzra1 d1xeea1 d1vkoa1 d1vm6a3 d3qvsa1 d2pkqo1  
d1b7go1 d1gr0a1 d1p1ja1 d1lc0a1 d1j0xo1 d3pwka1 d2hjsa1 d1zyao1  
d1vkna1 d1t1ta1 d1nvmb1 d3sjua\_ d3ojfa1 d1xu9a1 d2jjya1 d1n7ha\_  
d1y1pa1 d1h5qa\_ d1jtva\_ d4fs3a\_ d2bkaa1 d1gy8a\_ d2c5aa1 d1ulsa\_  
d1ooea\_ d2b69a1 d1y5ma1 d1spxa\_ d1aela\_ d1bxka\_ d1ydea1 d1gega\_  
d1hdoa\_ d1o5ia\_ d1e6ua\_ d1snya1 d2rhca\_ d3zv4a\_ d5ceja\_ d2d1ya1  
d3w8ea\_ d2fmua1 d1x1ta\_ d1rpna\_ d3ay7a1 d1k2wa\_ d1eq2a\_ d2hrba1  
d3ruaa\_ d2ew8a1 d4hwka\_ d1xgka\_ d2bd0a1 d1yo6a1 d2a35a1 d2ntva\_  
d1vl8a\_ d1hdca\_ d4bkua\_ d2ag5a1 d2q45a\_ d1nffa\_ d4iy1a\_ d1zbqa1  
d1kewa\_ d1ek6a\_ d1ja9a\_ d2q46a2 d1iy8a\_ d1cyda\_ d2ptga\_ d1hxha\_  
d1uzma1 d3lyla\_ d4m89a\_ d3wyea\_ d2b11a1 d1w6ua\_ d1sb8a\_ d2q2va\_  
d4nr0a\_ d1e6wa\_ d2gasa\_ d3oiga1 d2bgka1 d1mxha\_ d1vl0a1 d1rkxa\_  
d1r6da\_ d1wmaa1 d1e7wa\_ d2c07a1 d1xkqa\_ d3tzha\_ d1g0oa\_ d3lz6a\_  
d1qyca\_ d1ledoa\_ d1gz6a\_ d1oc2a\_ d1t2aa\_ d1zema1 d2xoxa\_ d1z45a2  
d1geea\_ d1p33a\_ d3lt0a\_ d4e6pa\_ d2wyua\_ d1db3a\_ d4q9na\_ d1xhla\_  
d4o1ma\_ d1fmca\_ d2uvda\_ d2gdza1 d1uaya\_ d2z1ma\_ d2o23a2 d2fr1a2  
d2fr1a1 d1qsga\_ d1qyda\_ d4zjua\_ d2a4ka1 d1yb1a\_ d1wvga1 d1yxma1  
d3f4ba\_ d1mg5a\_ d1xg5a1 d1r55a1 d3gboa\_ d1kufa\_ d1buda\_ d4q11a\_  
d1quaa\_ d1yp1a\_ d1wnia\_ d3nqyb\_ d4gera\_ d1bqba\_ d1xd3a\_ d3ifwa\_  
d1rypd\_ d1irua\_ d1rypc\_ d3unfk\_ d1rypa\_ d1j2pa\_ d1irui\_ d1j2qh\_  
d3unfh\_ d1m4ya\_ d1rypb\_ d1irul\_ d1iru2\_ d1q5rh\_ d1rypg\_ d1g3ka\_  
d1iruf\_ d1q5qa\_ d1e94a\_ d1irub\_ d1ryph\_ d3ty6a\_ d1iruj\_ d1iruk\_  
d1rype\_ d1irud\_ d1irue\_ d3mi01\_ d1rypf\_ d1iruh\_ d2z3ba\_ d1iruc\_  
d3mka2\_ d1irul\_ d1t3ca\_ d2a97a\_ d3fiea\_ g1elh.1 d3ioqa\_ d1fh0a\_  
d1o0ea\_ d1khqa\_ d1m6da\_ d2cb5a\_ d1cs8a\_ g8pch.1 d1s4va\_ d2pnsa\_  
d1vsna1 d1mira\_ d1iwda\_ d2oula\_ d7pcka\_ d3bwka\_ d3bcna\_ d2p86a\_  
d1pvja\_ d1pcia\_ d1gece\_ d1deua\_ d4bs6a\_ d1xkga1 d1cqda\_ d1jqpa2  
d2c0ya\_ d2bdza\_ d3p5ua\_ d1zoya1 d1qo8a2 d1d4ca2 d1chua2 d1jnra2  
d1kf6a2 d2jk6a2 d2jk6a1 d1feca1 d1feca2 d1lpfa1 d1lpfa2 d1xhca1  
d1xhca2 d1dx1a2 d1dx1a1 d1gera2 d1m6ia2 d1onfa2 d3lada2 d3lada1

d1w4xa1 d1w4xa2 d1gesa2 d1mo9a1 d1xdia1 d1fl2a2 d1fl2a1 d1fcda1  
d1fcda2 d1h6va2 d1h6va1 d1mo9a2 d1gv4a2 d1gv4a1 d2gv8a2 d2gv8a1  
d1aoga1 d1aoga2 d1hyua1 d1ebda1 d1ebda2 d3dk9a1 d1q1ra2 d1q1ra1  
d1gesa1 d1pn0a1 d1reoa1 d1ju2a1 d2f5va1 d3c96a1 d2gmha1 d1pj5a2  
d1gpea1 d1o5wa1 d1n4wa1 d2dw4a2 d2ivda1 d1seza1 d2voua1 d1kdga1  
d2bcgg1 d2bcgg2 d1d5ta1 d1liuka\_ d2csua1 d3q9ub\_ d2yv1a1 d3q9na\_  
d2d59a\_ d1oi7a1 d2yv2a1 d1euca1 d1y81a1 d3nvva1 d1krha3 d2h88b1  
d1n62a2 d1t3qa2 d1kf6b2 d1zoyb1 d1jq4a\_ d1ffva2 d1dgja2 d1rm6c2  
d1k8ka2 d1k8ka1 d3uleb1 d3i33a2 d3i33a1 d1bupa1 d1dkgd2 d1dkgd1  
d4ci6a2 d1jcf1a1 d4a2ba2 d2fxua1 d1yaga2 d4cbua2 d1bupa2 d1r7ha\_  
d1faaa\_ d1wika1 d1xfla\_ d1ttza1 d2f51a1 d1ti3a\_ d1nhoa\_ d1sena\_  
d2i4aa\_ d1ep7a\_ d1zmaa1 d1fo5a\_ d3lefa1 d3diea1 d2yana1 d1z6na1  
d1oaza\_ d3zywa1 d4aj8a\_ d1nm3a1 d4fiwa\_ d1wmja\_ d4hs1a1 d1lloa\_  
d1xwaa1 d1wjka1 d2vm1a\_ d1fb6a\_ d1gh2a\_ d1h75a\_ d1nw2a\_ d1kx5b\_  
d3a6na\_ d4m6ba2 d2nqbd\_ d3wkjd\_ d2yfwe\_ d4h9na\_ d5bnxa\_ d1kx5c\_  
d3r45a\_ d1eqzb\_ d4jjnb\_ d1f66c\_ d1eqza\_ d4wnnb\_ d1kx5a\_ d1u35c1  
d1id3a\_ d2nqbc\_ d2b5ea2 d2b5ea3 d2b5ea1 d2b5ea4 d2kp1a1 d2kp2a1  
d1hyua3 d1hyua4 d1j08a1 d1j08a2 d1pd212 d1nhya2 d2a2ra2 d1k0dd2  
d1f2ea2 d1gsua2 d1f3ba2 d2fhea2 d2pvqa1 d1tw9a2 d1oyja2 d1e6ba2  
d1k0ma2 d3ik7a1 d4is0a1 d1r5aa2 d1jlva2 d1m0ua2 d3gtub2 d1z9ha2  
d1okta2 d1axda2 d2gsra2 d1tu7a2 d1k3ya2 d1zgma1 d1b48a2 d1gnwa2  
d1gwca2 d2gsta2 d1glqa2 d1oe8a2 d1pn9a2 d1v2aa2 d1fw1a2 d1duga2  
d1g7ea\_ d2trcp\_ d4iilya\_ d1chka\_ d4olta\_ d1qqya\_ d1gd6a\_ d1f6ra\_  
d1livma\_ d2gv0a\_ d1iiza\_ d2z2fa\_ d1j8xa\_ d1ghla\_ d1b9oa\_ d1741a\_  
d1691a\_ d2o4wa\_ d1p37a\_ d1xjta1 d1jtma\_ d2f2qa\_ d4e97a1 d3w3ea\_  
d4tx7a\_ d3cq1a\_ d4msta\_ d3iwra\_ d1dxja\_ d2z37a\_ d4dyga\_ d2pjsa1  
d1k11a\_ d2i7ra1 d1ecsa\_ d1xqaa1 d5cj3a1 d1npba\_ d1jifa\_ d2p7oa\_  
d1r9ca\_ d1mpya2 d1kw3b2 d1kw3b1 d4ghga1 d1tfza1 d3isqa1 d3isqa2  
d1sqia1 d1sqia2 d1lkda2 d1lkda1 d1mpya1 d1cjxa2 d1cjxa1 d1sp9b2  
d1t47a1 d1t47a2 d1f1ua2 d1sp8a1 d1sp8a2 d1f1ua1 d4iuaa3 d4bvva\_  
d5hpga\_ d3k65a\_ d1ki0a3 d1ki0a2 d1ki0a1 d1a0ha1 d1pmla\_ d3sp8a3  
d2feba1 d1qsta\_ d2beia1 d4m3sa\_ d1u6ma1 d1yk3a1 d3dr6a\_ d1xmta\_  
d1z4ea1 d2ge3a1 d1bo4a\_ d2fiaa1 d2jdca1 d1y9wa1 d3to7a\_ d1wwza1  
d2f14a1 d2ozua1 d2b5ga\_ d2cy2a1 d2p0wa\_ d1cm0a\_ d4pswa\_ d1yrea1  
d1yr0a1 d1m4ia\_ d2gana1 d1yvka1 d1ghea\_ d2g3aa1 d1y7ra1 d2euia1  
d1q2ya\_ d2fsra1 d1xeba\_ d2ae6a1 d1cjwa\_ d1qsma\_ d2aj6a1 d1y9ka1  
d1i12a\_ d1vkca\_ d2atra1 d1n71a\_ d2d4pa1 d2fiwa1 d2fe7a1 d1tiqa1  
d2ou2a\_ d1yx0a1 d2fcka1 d1p0ha\_ d2j8ma\_ d2pq8a\_ d1z4ra1 d1s3za1  
d1ufha\_ d1xvqa1 d1pn0a2 d3hy2a\_ d2cvba1 d1o8xa\_ d1lu4a\_ d1we0a1  
d2bmx1a1 d2a4va1 d1psqa\_ d1xiya1 d1q98a\_ d1n8ja\_ d1zofa1 d2ggta\_  
d3tjja\_ d4je1a1 d1o73a\_ d3s9fa\_ d2zcta\_ d1qmva\_ d1jfua\_ d2b1ka\_  
d5dvba1 d2b5xa1 d2v2ga\_ d1st9a\_ d3tb2a\_ d4llra\_ d4fh8a1 d1e2ya\_  
d1knga\_ d2h30a\_ d1i5ga\_ d2z9sa\_ d2f8aa1 d1tp9a1 d2b7ka\_ d1nm3a2  
d3hvva\_ d2wfca1 d4kcea\_ d1xvwa1 d4gqca1 d3qpma\_ d4k1fa\_ d1zsoa1

d1gp1a\_ d1prxa\_ d4od7a1 d1z6ma1 d4mcua1 d4dvca1 d1r4wa\_ d3l9sa\_  
d3rppa\_ d1rmka\_ d1ixta\_ d1cnna\_ d1fu3a\_ d1g1pa\_ d1f3ka\_ d1fyga\_  
d4mh8a\_ d1mu2a2 d4i7ga1 d1jgta2 d1ofda3 d1ea0a3 d1ecfa2 d1ct9a2  
d1ao0a2 d1te5a\_ d1ys1x\_ d4hs9a\_ d1ispa\_ d1ex9a\_ d1ku0a\_ d3qmma\_  
d2h1ia1 d2r8ba1 d3b5ea1 d3cn9a\_ d4l3wa\_ d1llfa\_ d1gz7a\_ d1ukca\_  
d1cr6a2 d1svpa\_ d1mbma\_ d3su6a1 d1cu1a1 d4agka\_ d1vcpa\_ d1q31a\_  
g1n1l.1 d3e90b\_ d1ep5a\_ d3u1jb\_ d2ddfa\_ d3zxha\_ d1cgl\_a\_ d1rm8a\_  
d1eaka2 d1hy7a\_ d2jsda\_ d1cxva\_ d1hv5a\_ d1i76a\_ d1eb6a\_ d3p0ya1  
d1igra1 d1igra2 d1n8yc2 d1n8yc1 d1m6ba2 d1m6ba1 d1dzka\_ d4tlja\_  
d2a2ua\_ d4wfva\_ d3t1da\_ d4iaxa\_ d3zq3a\_ d2nnda\_ d1i4ua\_ d1kxoa\_  
d1bbpa\_ d1kt7a\_ d1exsa\_ d3s26a1 d1lf7a\_ d1qfta\_ d4gh7a\_ d1z24a1  
d1qabe\_ d1xkia\_ d1ew3a\_ d3bx7a\_ d4iawa1 d1n0sa\_ d3kzaa\_ d2k23a\_  
d2l9ca1 d2joza1 d1gm6a\_ d3kffa\_ d3saoa1 d1e5pa\_ d1yupa1 d1iia\_  
d2tbvc\_ d1c8nc\_ d1x36a\_ d1smvc\_ d1ng0c\_ d4sbvc\_ d1lopa\_ d1f2nc\_  
d1cixa\_ d1y29a\_ d1v7fa\_ d2jtba\_ d1d1ha\_ d1g9pa\_ d1lupa\_ d1qk7a\_  
d1mb6a\_ d2a2va\_ d1niya\_ d1hvwa\_ d2mpqa\_ d1ie6a\_ d1kqha\_ d1la4a\_  
d2mxoa1 d1d10a\_ d1koza\_ d1qk6a\_ d1emxa\_ d1lqra\_ d1c6wa\_ d1js9c\_  
d1f15b\_ d1za7a\_ d1laja\_ d4lu0a\_ d1of8a\_ d3unda1 d3e9aa1 d1vr6a2  
d2qkfa\_ d1d9ea\_ d1o60a\_ d1l6ja5 d1l6ja4 d1eaka4 d1eaka3 d1l6ja3  
d1h8pa2 d1h8pa1 d1ny721 d1ny722 d1a6ca3 d1a6ca2 d1a6ca1 d1pgl22  
d1pgl21 d1pgl11 d1ny711 d1mqta\_ d1d4m3\_ d1fmd3\_ d2mev1\_ g1aym.1  
d1ev13\_ d4q4w1\_ d1r1a3\_ d2x5ia\_ d1rhi1\_ g1r1a.1 g1d4m.1 g1rhi.1  
d1b35b\_ d1lopa\_ d1tme1\_ d4iv1a\_ g1pvc.1 g1fpn.1 d1fpn1\_ d4gb31\_  
d1d4m1\_ d1fmd1\_ d2wzr3\_ g1cov.1 d1qqp3\_ g1fmd.1 d2x5ic\_ d1rhi3\_  
g1oop.1 d1hxs1\_ g1hxs.1 d1fpn3\_ d1bev1\_ g2mev.1 d1eah3\_ d1aym1\_  
d1pvc3\_ d1qqp1\_ d1zba3\_ d1h8ta\_ d3vbhc\_ g1b35.1 g1bev.1 d1hxs3\_  
g1ev1.1 d1bev3\_ g1tmf.1 d1tmf1\_ d1b35a\_ d2mev3\_ g1eah.1 g1h8t.1  
d1eah1\_ d4q4w3\_ d1r1a1\_ d1aym3\_ d1pvc1\_ d1zba1\_ d1h8tc\_ d1loopc\_  
d1tme3\_ g1qqp.1 d4iv1c\_ g1tme.1 d3ubub\_ d1legia\_ d1v7pa\_ d1tdqb\_  
d3ubua\_ d1c3ab\_ d1h8ua\_ d3bx4b\_ d1t8ca1 d1sb2a1 d1qdda\_ d2ziba1  
d3cada\_ d1byfa\_ d1j34b\_ d1jwia\_ d1jzna\_ d1c3aa\_ d1oz7b\_ d1wmza\_  
d3bdwb\_ d1hq8a\_ d1fifa1 d1dv8a\_ d3hupa\_ d1wk1a1 d1umra\_ d2afpa\_  
d3bx4a\_ d1gz2a\_ d1sl6a\_ d1v7pb\_ d3g8ka\_ d1ixxa\_ d1j34a\_ d1jwib\_  
d1g1sa1 d1y17a1 d1ja3a\_ d1fvub\_ d3bdwa\_ d1sb2b1 d1fvua\_ d1umrc\_  
d1oz7a\_ d4m17a\_ d3cfwa1 d1ypqa1 d1g1ta1 d3fd4a\_ d3l9jc\_ d4dn8a1  
d1v4lb\_ d1rdl1\_ d2msba\_ d4w9ta\_ d1jvna1 d4x2ra1 d1qo2a\_ d4axka1  
d1thfd\_ d1h5ya\_ d4u28a\_ d2y88a\_ d4wd0a\_ d1vzwa1 d3ia2a\_ d1a88a\_  
d4dgqa1 d1hkha\_ d1zoia\_ d4lt9a1 d3tc7a1 d3hoja\_ d1i4na\_ d3vnda\_  
d3n18a1 d1geqa\_ d3naval d1v5xa\_ d4a2ra1 d3tc6a1 d1ujpa\_ d4ijba\_  
d1xcfa\_ d1vc4a\_ d1rd5a\_ d3b5va\_ d2r80b\_ d1cqa1 d1cg5a\_ d1gcvb\_  
d3boma\_ d2h8fb\_ d2raoa\_ d3bj1a\_ d4hrrb\_ d2r50a\_ d3d1kb\_ d2aa1b1  
d3zhwa\_ d3hf4b\_ d3gdja\_ d1jebb\_ d3bj1b\_ d1x9fb\_ d1wmub\_ d1gcva\_  
d3bcqb\_ d3d4xb\_ d2dc3a\_ d3hf4a\_ d4yu3a\_ d3k8ba\_ d1qpwb\_ d2r80a\_  
d3bcqa\_ d1v4wa\_ d3wtgb\_ d1jl7a\_ d4esaa\_ d1a9we\_ d3d1ab\_ d1fsla\_

d4h21a\_ d1v4wb\_ d1mwca\_ d1vhba\_ d1jeba\_ d1spgb\_ d1h97a\_ d1q1fa\_  
d1tu9a1 d3d1aa\_ d1hdsb\_ d3hyub\_ d2zfb\_ d3fs4a\_ d1oj6a\_ d1shrb\_  
d4h21b\_ d4yu3b\_ d1spga\_ d3hrwa\_ d3qqra\_ d3at5a\_ d4wchd\_ d3hyua\_  
d1cg5b\_ d1uc3a\_ d1hbra\_ d2raob\_ d1outb\_ d4esab\_ d3gdjb\_ d3qqqa\_  
d1x9fc\_ d3vrfa\_ d1litha\_ d3mkba\_ d3d4xa\_ d3mjpa\_ d1jl6a\_ d3fh9a\_  
d1outa\_ d2dc3b\_ d1lit2a\_ d3eoka\_ d3g46a\_ d1qpwa\_ d3vrfb\_ d1ch4a\_  
d1x9fd\_ d1hdsa\_ d2zfb\_ d3mkbb\_ d1or4a\_ d3wtga\_ d1a4fa\_ d3fh9b\_  
d3bomb\_ d3cy5a\_ d3at5b\_ d1x9fa\_ d2oifa\_ d4lmb\_ d1cpcb\_ d3v57a\_  
d1kn1a\_ d1cpca\_ d4f0ta\_ d2vjha\_ d4po5b\_ d1eyxa\_ d1alla\_ d4f0tb\_  
d1b33b\_ d1b8db\_ d4h0mb\_ d2vjhb\_ d4l6b\_ d2vmlb\_ d1allb\_ d2vjta\_  
d3dbja\_ d2vmla\_ d2vjtb\_ d4f0ub\_ d1f99b\_ d4rmpa1 d1liaa\_ d1eyxb\_  
d2uulb\_ d4lmsb\_ d4f0ua\_ d2bv8a\_ d1f99a\_ d2bv8b\_ d2c7lb\_ d3dbjb\_  
d4rmpb1 d1b8da\_ d4h0ma\_ d3v57b\_ d1kn1b\_ d1liab\_ d2uula\_ d2j96a\_  
d1azwa\_ d1hlga\_ d3c8da2 d2pbla1 d1jkma\_ d1lzla\_ d1jjfa\_ d2qvba\_  
d2v9za\_ d4kafa1 d2m5ta\_ d1cqqa\_ d1wqsa\_ d5bpea\_ d2ipha\_ d1lvoa\_  
d2bhga1 d3tnta\_ d3sjia\_ d3d23a1 d2fyqa\_ d3tloa\_ d3zvea1 d2hrva\_  
d3q3ya1 d4asha1 d1b9ra\_ d1offa\_ d1frra\_ d3wcqa\_ d1e9ma\_ d1l5pa\_  
d1wria\_ d1i7ha\_ d3av8a\_ d1czpa\_ d1rfka\_ d3plma1 d3b2ga\_ d2bt6a2  
d1xm5a\_ d1xaxa\_ d1tvia\_ d1pv8a\_ d1w5qa\_ d2c1ha\_ d1ohla\_ d1l6sa\_  
d1dosa\_ d1gvfa\_ d3qm3a1 d2fjka\_ d1f74a\_ d3l21a\_ d2e1da\_ d1to3a1  
d1w3ia\_ d1sfla\_ d1n7ka\_ d1vcva1 d4imea\_ d1wa3a\_ d2ocza1 d1f2ja\_  
d3m16a\_ d2yxga\_ d1ub3a\_ d3a5fa\_ d1fbaa\_ d1l6wa\_ d1xfba1 d1wx0a1  
d1vpxa1 d1mxsa\_ d2a4aa1 d1xkya1 d3cq0a1 d3s1xa\_ d1f05a\_ d1fdja\_  
d3cpra1 d4d2ja\_ d1cg2a1 d1yloa2 d1y7ea2 d1y0ya3 d1lfwa1 d1vixa1  
d1fnoa4 d1vh0a2 d1ysja1 d1z2la1 d2fvga2 d1vgya1 d1r3na1 d2grea2  
d1xmba1 g1q7l.1 d1rtqa\_ d3rp2a\_ glucy.1 d1fuja\_ d2zchp\_ d3w94a\_  
d1si5h\_ d1lo6a\_ g2pka.1 d1cgha\_ d1kigh\_ d1a5ia\_ d3s9ba\_ d1hj8a\_  
d1ao5a\_ d2anya\_ d1q3xa1 d1gvza\_ d1azza\_ d4gsoa\_ d2f91a1 d1iaua\_  
d1gdna\_ d1eufa\_ g1fiw.1 d1eq9a\_ d4nfea\_ d2rdla\_ d1spja\_ d1elva1  
d1a7sa\_ d1ekbb\_ d1pfxc\_ d1yc0a\_ d2aiqa\_ g1fiz.1 d1fi8a\_ d4k60a\_  
d4dgja\_ d1mzaa\_ d1op0a\_ d3tjva\_ d1pytd\_ d1sgfg\_ g1gg6.1 d2eeka\_  
g1rtf.1 d1a0ja\_ d3g01a\_ d1pytc\_ d4e7na\_ d1ddja\_ d1z8ga1 d2hlca\_  
d1npma\_ d1brup\_ g1jou.1 d1sgfa\_ d1autc\_ g2hnt.1 g1kdq.1 d1orfa\_  
d3s69a\_ d4crga\_ d1fxya\_ d1bqya\_ d2ftba\_ d1pmpa\_ d2rcqa1 d1fdqa\_  
d4lkpa\_ d1sa8a\_ d1vyfa\_ d1lpja\_ d3vg7a1 d4azqa1 d1o8va\_ d5bvqa\_  
d1p6pa\_ d2qo4a\_ d1opba\_ d1yiva1 d1olva\_ d4bvma1 d4tkba\_ d4i3ba\_  
d1bwya\_ d1ftpa\_ d1ggla\_ d4gkca\_ d1cbia\_ d3p6da1 d1kqwa\_ d2a0aa1  
d1jx4a2 d3gv5b1 d1t94a2 d3bq0a2 d3lgia\_ d3i77a\_ d2z9ia2 d4nsva\_  
d1lcya2 d4jcna\_ d1os8a\_ d1hpga\_ d1p3ca\_ d1l1ja\_ d1qtfa\_ d1e69a\_  
d1mv5a\_ d3g60a4 g1ii8.1 d1ewqa2 d1ji0a\_ d1qhla\_ d1v43a3 d2wmfa1  
d1vpla\_ d1g2912 d4a82a2 g1f2t.1 d2d62a1 d3tuic1 d2bbsa1 d3g60a3  
d2ixea\_ d1sgwa1 d2qi9c\_ d3rlfa1 d3b60a1 d3d31a2 d2pzea1 g1xew.1  
d1jj7a\_ d1oxxk2 d2onka1 d1wlwa\_ d1iwea\_ d1qf5a\_ d1vmaa2 d1nija1  
d1np6a\_ d2p67a1 d3ihla\_ d1okkd2 d1lsl1a2 d1slma2 d1liona\_ d2v40a\_

d1dj3a\_ d3hida\_ d2vo1a1 d2g0ta1 d1vcoa2 d1j8mf2 d1g3qa\_ d1xjca\_  
d1p9ba\_ d1qzxa3 d1ihua2 d1ihua1 d2qm8a\_ d1dj2a\_ d4ioja\_ d1cp2a\_  
d1yrba2 d1hyqa\_ d3gqba2 d1skye3 d1xp8a1 d1tf7a2 d1tf7a1 d1ye8a1  
d1skyb3 d2qe7d2 d4blta\_ d4huta\_ d3ldaa2 d4hyya\_ d2i3ba1 d1cr1a\_  
d3j9tb2 d3ntua2 d1vdza1 d2z43a\_ d1e9ra\_ d1nlfa\_ d3ziaa2 d1n0wa\_  
d1g6oa\_ d3ziad2 d3j9ta2 d3gqbb2 d2i49a\_ d1nnfa\_ d1xvxa\_ d1ursa\_  
d1h3da1 d1iuda\_ d4m1va1 d1twya\_ d3e13x\_ d2nxoa1 d4pfua\_ d3ttma\_  
d1e1ja\_ d2qmwa1 d1us5a\_ d1y3na1 d1jeta\_ d1uqwa\_ d4f19a1 d2esna2  
d3thia\_ d3fasa1 d2uyeb\_ d2xwva1 d1r9la\_ d2fyia1 d1pb7a\_ d2ozza1  
d1sw5a\_ d1nh8a1 d1vr5a1 d2g29a\_ d1xs5a\_ d3lswa\_ d2z23a\_ d3w9va\_  
d3tcha\_ d1q35a\_ d1z7me1 d3q27a\_ d1p99a\_ d1ve4a1 d2i6ea1 d4mcoa1  
d4n8ya\_ d1eu8a\_ d1zbma1 d1hsla\_ d1ixca2 d1j1na\_ d1xvya\_ d1y9ua\_  
d2z22a1 d1xoca1 d4oera\_ d1wdna\_ d5f1qa1 d1xt8a1 d1i6aa\_ d4gwoa\_  
d4igta1 d1pc3a\_ d4mmpa1 d1o63a\_ d2czla1 d2onsa2 d4mija1 d4ok5a1  
d2bmfa1 d2bmfa2 d1yksa1 d1yksa2 d2qeqa1 d2jlqa1 d1a1va2 d1eh3a\_  
d3skpa\_ d1dtza1 d1dtza2 d1ieja\_ d1jnfa2 d1ce2a1 d1jnfa1 d1b1xa2  
d1b1xa1 d1jw1a2 d1ryoa\_ d1h76a1 d1h76a2 d1c4oa1 d2p6ra3 d2p6ra4  
d1oywa2 d1oywa3 d1wrba1 d1w36b2 d1w36b1 d1c4oa2 d3bora\_ d1t6na\_  
d2eyqa5 d2eyqa3 d2eyqa2 d2zu6a2 d1veca\_ d1uaaa1 d1w36d1 d2g9na1  
d1z3ix2 d2rb4a\_ d1hv8a1 d1hv8a2 d1t5ia\_ d1w36c2 d2j0sa2 d2j0sa1  
d3hjha1 d1z5za1 d1qdea\_ d1z63a1 d1s2ma2 d1s2ma1 d1wp9a1 d1wp9a2  
d1gm5a3 d1gm5a4 d3dina4 d3dina3 d1q0ua\_ d1w36c1 d1z3ix1 d1nkta3  
d1nkta4 d1uaaa2 d1w36d2 g1qhh.1 d2fwra2 d2fwra1 d3q3ma\_ d1za0a1  
d2inca\_ d1jk0a\_ d2incb\_ d1mhyb\_ d3hf1b\_ d1mtyb\_ d1r2fa\_ d2uw1a\_  
d1mhyd\_ d3n37a\_ d1afra\_ d1oquc\_ d1syya\_ d1mtyd\_ d2o1za\_ d1uzra\_  
d1smsa\_ d2fkza\_ d1zujal d1s3qa1 d2fjca1 d1z6om1 d1veia\_ d4dyya\_  
d1jiga\_ d3gvya\_ d2pyba\_ d4cy9a1 d3bvfa1 d1r03a\_ d2cf7a\_ d1nf4a\_  
d1zs3a1 d4iwka\_ d3ka8a\_ d3np0x\_ d1n1qa\_ d11b3a\_ d4e6ka\_ d1z6oa1  
d2fzfa1 d4dyua\_ d3ge4a\_ d1jgca\_ d4am4a\_ d2z6ma\_ d1ji5a\_ d1vlga\_  
d1lkoa1 d3qz3a\_ d1o9ra\_ d2ffxj\_ d1euma\_ d1yv1a1 d2v2pa\_ d1j30a\_  
d4di0a\_ d1dpsa\_ d2cbia2 d2choa2 d1l8na1 d1oewa\_ d2qzxa\_ d2asia\_  
d1psoe\_ d1miqa\_ d1smra\_ d2h6ta\_ d1pfza\_ d1izda\_ d3hd8a\_ d1j71a\_  
d1dpja\_ d4aa9a\_ d1t6ex\_ g1b5f.1 g1lya.1 g1htr.1 d1qdma2 d1bxoa\_  
d1wkra\_ d1tzsa\_ d2qzwa\_ d1orva2 d1xfda2 d1bdqa\_ d3ggta\_ d3ixoa\_  
d1mrxa\_ d2haha\_ d1tw7a\_ d4njsa\_ d1sgua\_ d2p3da\_ d1nsoa\_ d3d3ta\_  
d2rkfa\_ d1c6ya\_ d2rspa\_ d3ogpa\_ d3ekwa\_ d2o4na\_ d2j9ja\_ d1baia\_  
d3ggua\_ d3lzua\_ d4npua\_ d4j55a\_ d2r8na\_ d2fxda\_ d2p3ca\_ d4dqea\_  
d3ttpa\_ d3t3ca\_ d2p3aa\_ d2hc0a\_ d2fdda\_ d3mwsa\_ d1um8a\_ d1ixza\_  
d1qvra2 d1qvra3 d1sxjc2 d1jr3d2 d2p65a\_ d1l8qa2 d1g8pa\_ d3hu3a3  
d1sxjd2 d1njfa\_ d1in4a2 d1sxja2 d1tuea1 d2ce7a2 d1w5sa2 d1sxjb2  
d1d2na\_ d1ny5a2 d1ofha\_ d2gnoa2 d2a5yb3 d1fnna2 d1u0ja1 d1lv7a\_  
d1iqpa2 d2fnaa2 d1ixsb2 d4gita\_ d1sxje2 d1g41a\_ d1h4ra3 d4yl8a1  
d2a16a3 d1wgda1 d1wggal d4q5eb\_ d1wjna1 d1se9a\_ d3n3kb\_ d1wz0a1  
d1we6a1 d2m0xa\_ d2gbka\_ d3rt3b1 d1wh3a1 d1sifa\_ d2ekek2 d4ii2b1

d4hk2a1 d1c3ta\_ d1m94a\_ d1wgha1 d1ttna1 d1j8ca\_ d1wx8a1 d3v6cb1  
d2ma9b\_ d4i61b1 d1bt0a\_ d2jvca1 d1iyfa\_ d2k1fa\_ d1wxva1 d1wf9a1  
d1t0ya\_ d2io0b2 d1x1ma1 d2gbma\_ d1zw7a1 d2m17a\_ d1ud7a\_ d1we7a1  
d21wpa\_ d2gbja\_ d1wjua1 d1v6ea1 d1v86a1 d4eewa\_ d1wiaa1 d4icva\_  
d4gu2a\_ d1wx7a1 d1wy8a1 d4hjka1 d2faza1 d1v5oa1 d3ruib\_ d3waob\_  
d2r2qa1 d3m95a\_ d3wana\_ d2a13a1 d2cr5a1 d1wj4a1 d1s3sg\_ d1g66a\_  
d1qoza\_ d5ajha1 d2h0ba\_ d2erfa\_ d1h30a1 d3mw4a1 d1pz7a\_ d2r1ba\_  
d3v64a1 d1d2sa\_ d3bopa1 d3mw3a1 d1okqa1 d1okqa2 d1adqa1 d1fnga1  
d1uvqb1 d1zs8a1 d2vola1 d2vola2 d1mfb12 d2jelh2 d1uwel2 d3qq4b1  
d1kjob\_ d1k5na1 d1osph2 d4odh12 d1ow0a1 d1ow0a2 d1bfob2 d3l9ra2  
d3jtth1 d2fath2 d4elkb2 d1fn4b2 d2xfxb\_ d1pg7x2 d1cqka\_ d4k71b2  
d1lk2a1 d1eapb2 d4lfhg2 d1i4fa1 d2nw2a2 d1kfah2 d1mhca1 d1h3ua1  
d1wejh2 d1h0db2 d1a5fh2 d1kcvh2 d1lmjuh2 d1qqda1 d1kcrh2 d1k8ia1  
d3huja2 d2nnab1 d1nfd2 d3mffb2 d1s9va1 d1lk3h2 d1q0x12 d1fv1b1  
d1neza1 d4rfeb2 d1r3ha1 d1a6tb2 d1kjva1 d1pz5b2 d1onqa1 d2bc4a2  
d1de4a1 d1k8da1 d1tcra2 d1dn0b2 d1nfd2 d2xwtb2 d1bfoa2 d1mexh2  
d1iakb1 d1ypzf2 d4f7ea2 d1q7212 d2fbjh2 d1fe8h2 d1clzh2 d1fngb1  
d1uvqa1 d1vgka1 d1c16a1 d4j12a2 d4x99b2 d1igtb3 d1je6a1 d1q72h2  
d1nldh2 d1teth2 d2hmic2 d1ilca2 d1ilca1 d1k8ib1 d1q0yh2 d1kfa12  
d3frua1 d1pg7w2 d1u58a1 d1igyb4 d1igyb3 d1hyrc1 d1klub1 d1deeb2  
d1c12b2 d2bc4b2 d2ig2h2 d1kcv12 d3wn5b1 d1lk2b\_ d1lk312 d1mjul2  
d1sm3h2 d1q0xh2 d1zvsal d1ydpal d1u8ib2 d1ypze2 d1kcuh2 d2e3fa\_  
d1mm0a\_ d2e3ea\_ d2l1da\_ d2ny8x\_ d2e3ga\_ d2ny9x\_ d2nz3a\_ d2lj7a\_  
d1n4na\_ d2m8bb1 d2kyqa\_ d3psma\_ d1jkza\_ d2g11a\_ d1ugla\_ d4uj0a\_  
d2k4ua\_ d1hp2a\_ d2lu9a\_ d1baha\_ d2meoa1 d1wm7a\_ d1hlya\_ d1n8ma\_  
d1jlza\_ d1wpda\_ d1c55a\_ d1pvza\_ d1wt7a\_ d1rjia\_ d1wz5a\_ d1m2sa\_  
d1pjva\_ d1c49a\_ d1qkya\_ d2ktca1 d1wmta\_ d1du9a\_ d1j5ja\_ d1rlga\_  
d1t0za\_ d2i61a\_ d1t1ta\_ d1sn4a\_ d1kv0a\_ d2lkba\_ d1npia\_ d1wwna\_  
d1pe4a\_ d2kbka\_ d2li7a\_ d1djta\_ d2kbha\_ d1sega\_ d1omya\_ d1zywa1  
d1jzaa\_ d1n9wa1 d1bbua1 d1e1oa1 d1c0aa1 d1b8aa1 d3a74a1 d1eova1  
d1t61c1 d1iyjb4 d1iyjb5 d1iyjb3 d1o7ia\_ d4ipca1 d1x3ea\_ d4apva\_  
d1jb7a1 d1jb7a2 d1jb7a3 d3kdfa\_ d1ue1b\_ d1wjja1 d3eiva\_ d1xjva2  
d1xjva1 d2ccza2 d1se8a\_ d1l1oc\_ d1jb7b\_ d1qvca\_ d3ulla\_ d1qzga\_  
d1mua4 d1mua5 d1mua3 d1y14b1 d2nn6i1 d1i941\_ d2zjra2 d1smxa\_  
d2qamc2 d1hh2p1 d2r7da1 d1rl2a2 d1wfqa1 d3bzka4 d1x6oa2 d3a0ja\_  
d2j01d2 d2ja9a1 d4q15a\_ d1hr0w\_ d1luza\_ d2n3sa\_ d2vnud1 d1h95a\_  
d1go3e1 d2nn6h1 d1ne3a\_ d2mola\_ d1iz6a2 d1jjga\_ d1e3pa2 d2ix0a3  
d2ix0a2 d2lxja\_ d1ueba3 d1ueba2 d2z0sa1 d1u0la1 d2ix0a1 d2eifa2  
d2je6i1 d3i2za1 d2c35b1 d2ahob2 d1t9ha1 d3i4oa\_ d2qall1 d1jt8a\_  
d2nn6g1 d1g6pa\_ d3cama\_ d1i94q\_ d1c9oa\_ d1d7qa\_ d2ba0a1 d2vnud2  
d2vnud3 d1khia2 d2qalq1 d1wi5a1 d1xtda2 d1ny4a\_ d1dgsa2 d1fvia1  
d1ckma1 d1p16a1 d1x9na2 d1xwdc1 d3kj4a\_ d1ozna\_ d1w8aa\_ d2ifga3  
d1xkua\_ d1rpma\_ d2shpa1 d1yfoa\_ d2ooqa1 d1g4us2 d1p15a\_ d1lara2  
d1lara1 d1wcha\_ d2fh7a2 d2fh7a1 d1ohea2 d2f4da\_ d1rxda\_ d2hxpa\_



d1xria\_ d1d5ra2 d1fpza\_ d3ezza\_ d4y2ea\_ d1i9sa\_ d3azya\_ d3wvja\_  
d1upsa1 d2hyka\_ d1ajka\_ d2vy0a\_ d1o4ya\_ d3o5sa\_ d3d6ea\_ d3atga\_  
d1dypa\_ d1umza\_ d3i4ia\_ d1c1la\_ d41bqa\_ d1a78a\_ d1slta\_ d4no4a\_  
d3zsja\_ d3duia\_ d1g86a\_ d1is3a\_ d1qmja\_ d1hlca\_ d1tdha3 d1q3ba3  
d1ee8a3 d1k82a3 g1qmo.1 g1len.1 d3zyra\_ d1fnya\_ d1n47a\_ g21tn.1  
d1avba\_ d3usua\_ d1dhkb\_ d1f9ka\_ d1lukga\_ d1g8wa\_ d1g9fa\_ d3wcsa\_  
d1g7ya\_ g1loe.1 d1mvqa\_ d1hq1a\_ d1v6ia\_ d1dbna\_ d1qnwa\_ d1fx5a\_  
d418qa\_ d1ioaa\_ d3n35a\_ d3ubra\_ d1qo8a1 d1d4ca1 d2k3va\_ d1ft5a\_  
d1qdba\_ d1m1qa\_ d2j7aa\_ d1h21a\_ d1ogyb\_ d4fasa\_ d1jnia\_ d1oaha\_  
d1sp3a\_ d3h33a\_ d1rwja\_ d19hca\_ d1os6a\_ d3bxua\_ d3h4na\_ d1i77a\_  
d3caoa\_ d1j0pa\_ d2ctha\_ d1duwa\_ d1ofwa\_ d2e84a\_ d1hh5a\_ d1gyoa\_  
d3h34a\_ d1wioa4 d1ccza2 d1dr9a2 d1ic1a1 d2d9qb1 d2nxyb2 d2dara2  
d2dara1 d1wyha2 d2dloa2 d1rutx4 d1rutx3 d2cuqa2 d1x41a2 d1x41a1  
d1x3ha2 d1x3ha1 d2d8za1 d1x61a2 d1x6aa1 d1x6aa2 d2cora2 d2cora1  
d1v6ga1 d1v6ga2 d2d8za2 d1x64a1 d1x64a2 d1b8ta1 d2co8a1 d1x63a2  
d2dj7a2 d2dj7a1 d2cu8a2 d2cu8a1 d1g47a2 d1g47a1 d1j2oa1 d1wyha1  
d2dloa1 d1wiga1 d1wiga2 d2cupa2 d2cupa3 d1x68a1 d2d8ya2 d2d8ya1  
d1m3va2 d1x62a1 d1x68a2 d1x61a1 d1b8ta3 d1b8ta2 d2d8xa2 d2d8xa1  
d1x4ka1 d1x4ka2 d2cuqa1 d1m3va1 d2co8a2 d1j2oa2 d1x63a1 d2cura1  
d2cura2 d1x62a2 d1op9a\_ d1y01a1 d1letzb1 d1egj11 d2gsib1 d1nj9a1  
d4jfhdl d1aqk11 d1t2ja\_ d1lo4h1 d1zvy1 d3v4v11 d4enec1 d1kxtb\_  
d5e8ea1 d2pxya\_ d4weud\_ d1xiwc\_ d2esvd1 d1qnzh\_ d1ogae1 d1f4xh1  
d4n1hb\_ d3ezjb1 d3mlw11 d1kfah1 d1letza1 d1b4jh1 d3cfic\_ d4w68a\_  
d2arja1 d1ek3a\_ d2ok011 d1vera\_ d1uwgh1 d1blnb1 d1fpth1 d1rzga1  
d2giya1 d4m3kb1 d1nc2a1 d2nyyd1 d1ncna\_ d1fbih1 d5dxwa\_ d4fqqa1  
d1dqdh1 d1jfq11 d1kelh1 d1faih1 d1frgl1 d1figl1 d4m6n11 d1fo0a\_  
d4hxb11 d3b5ga\_ d3quyd1 d2h9gb1 d1i8kb\_ d2dd8h1 d2ck0h1 d1eaja\_  
d4w6wb1 d2a6ib3 d1t66d1 d2e27h\_ d1ob1b1 d1f11b1 d2v7na1 d2xt1b1  
d1pskh1 d4i13b1 d2op411 d1a0q11 d1uwel1 d1za3a1 d1ncb11 d4uu9a\_  
d1bm3h1 d1cloh1 d1nqba2 d1cf8h1 d4y5va\_ d1mhph1 d5anma1 d4cdgc1  
d41deb\_ d1y01b1 d2pcpb1 d1z3g11 d1dfb11 d1fh5h1 d3g5xa1 d1tzib1  
d4dn311 d3zhka1 d2b1hh1 d2uyl1 d1f3dh1 d1nj9b1 d2agjh1 d2h1p11  
d1q72h1 d8fabb1 d1ndmb1 d1rjca1 d4u6hb1 d3upca\_ d2fbj11 d1osph1  
d1tvda\_ d2cjev\_ d4fhbd1 d1bd2d1 d1rz7h1 d3nn8a\_ d1blna1 d1knoa1  
d1nfda1 d2bmkb1 d1dq11\_ d1igyb1 d1igf11 d12e8h1 d3utza1 d1nc2b1  
d1rihh1 d4mwfb1 d4jvpa1 d1mieh1 d1rhfa1 d1fgn11 d1sbsh1 d1lp9e1  
d1dn0a1 d4lqf11 d1iaih1 d1kgcd1 d1mh5b1 d1gpo11 d2g60h3 d1f8t11  
d2jixd1 d4grwh\_ d1fo0b\_ d1bfob1 d1axsa1 d1u9ka\_ d1nmbh\_ d1h8na1  
d1h8na2 d1jguh1 d4eura1 d3sdy11 d35c8h1 d1w7211 d1mvub\_ d1i9rh1  
d1ob1a1 d4wenb\_ d1yeeh1 d3ietc1 d1f58h1 d1ad0b1 d1mqkl\_ d1nbvh1  
d4b50a\_ d3r8bb\_ d1baf11 d1mamh1 d4rgne1 d2gsgb\_ d35c811 d1bafh1  
d1aih1 d2pcpa1 d2fath1 d2x1pa\_ d1orsb1 d1ibg11 d1shma\_ d1a2yb\_  
d1u0qa\_ d2coqa\_ d1hilb1 d1qfwi\_ d1jv5b\_ d1fn4b1 d5e0qa\_ d1nsh1  
d1plg11 d4ocx11 d1kb5h1 d1rzfh1 d1pg7x1 d2fx7h1 d2oi9c\_ d1l7i11

d3eyva1 d1d5i1l d4ffyl\_ d1tet1l d1a6wh\_ d1lac6a\_ d3dvfa\_ d1nfdel  
d1mimh1 d1ri8a1 d1jhlh\_ d3dura\_ d1fskb1 d1f97a1 d3so3b1 d2ak4d1  
d1lp9f1 d4z7wf1 d1l7th1 d4y5ya\_ d4x7ec1 d1emth1 d1ikfl1 d1nlbh1  
d4utal1 d1bjma1 d1eapb1 d1u6ah1 d2dtgd1 d1kj2b\_ d1xeda1 d1c1eh1  
d1fgvh\_ d2bnub1 d2fb4h1 d2dtgb1 d1ktrh\_ d1jpth1 d1qkz1l d4hepg\_  
d2atpb1 d1flrh1 d2hrpl1 d1mvfa\_ d1iaim1 d3k80a1 d2jb5h1 d3zkxc\_  
d4grwe\_ d1it9h1 d1rhhb1 d3w9ec\_ d1e4wh1 d1sy6h1 d2j6eh1 d3qxta\_  
d1jglh1 d1p7ka1 d1tzhb1 d4n8pa1 d1gaf1l d2jelh1 d1wioa2 d4i0cc1  
d1cicb1 d1lmka2 d1lmka1 d1iqwh1 d1lorqb1 d1ejoh1 d1jnlh1 d4zgia\_  
d43c9b\_ d1ggbl1 d1wejh1 d3q6fa1 d1f3dj1 d3c6la1 d1bqlh1 d3p9wb\_  
d1a3r1l d1h0db1 d2uzil\_ d1eo8l1 d1qfwl\_ d1n7ml1 d1igja1 d1c5ch1  
d2a9mh\_ d1rmfh1 d1fj1b1 d4heme\_ d1ccza1 d1a5fh1 d1logad1 d1dlfh\_  
d1qa9b\_ d1vge1l d3qskb\_ d1sjxa\_ d4ozfg1 d1sq2n\_ d1qd0a\_ d1kcvh1  
d1c5db1 d3qcul1 d8faba1 d3bn9d1 d1mjuh1 d4y8dc\_ d7fabh1 d3dvgb1  
d1lo0l1 d1a6tb1 d1gigh1 d1kcrh1 d2hwz1l d1yjdc1 d3clfl1 d4krna\_  
d1d17l\_ d1e6ol1 d1mexh1 d3r0ma\_ d4kkna\_ d1fnsl1 d1oaqh\_ d1rzia1  
d1ucbh1 d1ncw1l d4b41a\_ d1nfdfl d2mpah1 d2d7t1l d4grwf\_ d4b5ea\_  
d1lk3h1 d3u79a\_ d4u3xa\_ d1ghfl1 d1bvkb\_ d1mcw1l d1b88a\_ d1jrhh1  
d32c2b1 d4wemb\_ d1dsfh\_ d1op3h1 d1ce1l1 d1iqda1 d1qoka1 d1qoka2  
d1qfuh1 d2crya1 d1ay1h1 d1oaql\_ d3ab0b\_ d1rur1l d1t4kb1 d1bz7b1  
d1n0xh1 d1for1l d1ucbl1 d4w6yb\_ d43c9a\_ d2aabl1 d1tzia1 d4n1ca\_  
d1k6qh1 d3g9ab\_ d4tvsa1 d1igmh\_ d1pz5b1 d3dx9a1 d3wxwh\_ d1nakh1  
d1kcul1 d3eaka\_ d4qlra1 d1cr9l1 d1d9ka\_ d1f4xl1 d1deea1 d2i27n2  
d1c12a1 d2orbl1 d1j8hd1 d1mcph1 d1c5da1 d1kenh1 d1bd2e1 d1h5ba\_  
d4x7fc1 d3upaa\_ d1t3fa1 d1indh1 d2dtgc1 d4hc1l1 d1zv5a1 d4wgvb\_  
d1uwgl1 d4f37k1 d1aqkh1 d1vesa\_ d3zkqd\_ d1fpt1l d1lo4l1 d1knob1  
d3rrqa\_ d1ct8b1 d4orz\_ d1mlbb1 d4hgkc1 d1dqd1l d1bogb1 d4ozhe1  
d1dr9a1 d1i7za1 d1dn0b1 d1kell1 d1rzib1 d1ypzf1 d1wtla\_ d1hkfa\_  
d1fail1 d1figh1 d2vyre\_ d1sjva\_ d1ohqa\_ d1bfoa1 d1pkqb1 d1mjul1  
d1b4j1l d1nsn1l d2arjb1 d1p4bh\_ d4aj0a\_ d3nn8b\_ d2rcja1 d1f2xk\_  
d4v1dd\_ d1adqh1 d2eksa\_ d4k3ga\_ d1jfqh1 d1uweh1 d1frgh1 d4gftb\_  
d1uz8b1 d4nlea\_ d1bm3l1 d1clol1 d3mcka1 d2vq1a1 d1ae6h1 d4aq1b1  
d1uj3b1 d1nbqa1 d1fh5l1 d2ck0l1 d2ywwa\_ d1q72l1 d4nxbx\_ d1hila1  
d4hz1b1 d2j88l1 d1zmya1 d1cd0a\_ d1a4ka1 d1pskl1 d1a0qh1 d4krmb\_  
d1ncbh1 d2fbjh1 d1j8he1 d1i3ua\_ d1cf8l1 d1fe8h1 d2plya1 d1eeqa\_  
d2x89a\_ d1ol0a\_ d2r0lh1 d1ub5a1 d1dfbh1 d3eyvb1 d4jdvb1 d4p2cg\_  
d2gsia1 d2agjl1 d1u3ha1 d2h1ph1 d1rih1 d1fskc1 d1boga1 d2a77l1  
d1osp1l d1qfoa\_ d3dwta\_ d2fx7l1 d1rz7l1 d3stba1 d1pkqa1 d1b6da1  
d1dzba2 d1dzba1 d1kj2a\_ d4l1ha\_ d1rzgb1 d1dqlh\_ d12e8l1 d1miel1  
d1jmaa\_ d1sbs1l d1fgnh1 d1f58l1 d1mqkh\_ d1ndgb1 d3qegl1 d1iail1  
d2aw2a1 d1tqbc1 d3fo2a1 d4dkaa\_ d1f8th1 d2g60l1 d2ywwa\_ d1uj3a1  
d1yc7a\_ d3bd3a\_ d4w6xb1 d1nmb1\_ d1i8ka\_ d1rjlb1 d1ypze1 d1p7kb1  
d1kxqe\_ d1gpoh1 d2z4qa1 d1w72h1 d1i9r1l d4qgya1 d4xt1c\_ d2qqnh1  
d1cica1 d3c08h1 d2cd0a\_ d2bdnh1 d1hnga1 d1mam1l d1nldh1 d1cr9h1

d4lcih1 d3bkyh1 d3qg7l1 d1ai1l1 d1kxvc\_ d4iosd\_ d1l7ih1 d2x1qa\_  
d1ub6b1 d3k74b\_ d1libgh1 d1teth1 d1lgya1 d1hxma1 d2x6ma\_ d2e7la\_  
d5e03a\_ d1qfwm\_ d2r0kh1 d1lignb1 d1rurh1 d1plgh1 d1mj8h1 d1yuhb1  
d3fmg11 d1rzf11 d1emt11 d1ad9b1 d1lgtb1 d1nlb11 d1d5ih1 d3k7ua\_  
d4ffyh\_ d1bwva\_ d3dvga1 d1a6ta1 d1fgvl\_ d4qxgl1 d1mim11 d1jh11\_  
d2hffb1 d2hh0l1 d1qkzh1 d1l7t11 d1afvh1 d1iaii1 d2cjuh\_ d1um5h1  
d2ghwb2 d2ghwb1 d1kgce1 d2fgwh1 d1ikfh1 d1dvfd\_ d2i24n1 d2xtjb\_  
d1za3b1 d2yc1a\_ d2hh0h1 d2x1oa\_ d1bvka\_ d1rjla1 d5e7ba1 d1lgtal  
d1i11b1 d2fb4l1 d1mvua\_ d1jpt11 d32c2a1 d1fvca\_ d1iqdb1 d2hrph1  
d2p4ab\_ d4qo1a\_ d1p2cb1 d1wt5c\_ d1t4ka1 d5c1mb\_ d1it9l1 d1bz7a1  
d1b2wh1 d1e4wl1 d1jnl11 d1yedb1 d1za6b1 d3u7aa\_ d1lignh1 d3gnml1  
d1orsa1 d1wejl1 d1a2ya\_ d1hxmb1 d1gafh1 d2j4wh1 d1pz5a1 d1j05a\_  
d1a3rh1 d4fq1l1 d1qfwh\_ d1eo8h1 d1n7mh1 d4s11a\_ d1kegh1 d5da4a\_  
d1iqw11 d3whxb1 d1vgeh1 d1deeb1 d1c12b1 d1t2ql1 d1ad9a1 d3gsnb1  
d3b2uc1 d1ggbh1 d1t3fb1 d1nakl1 d4ocmc\_ d1lila1 d2v7hb3 d2esve1  
d1mcoh1 d2qr0b1 d2q3aa\_ d1ct8a1 d1kcr11 d2pxyb\_ d2uzih\_ d5c3ld\_  
d3durb\_ d1c5c11 d2ak4e1 d1d17h\_ d1xiwd\_ d1mlba1 d1rmfl1 d1i7zb1  
d1dlfl\_ d2xa3a\_ d5bq7b1 d1dqqb1 d3h42l1 d1egjh1 d1kcvl1 d1fe8l1  
d2j6e11 d1f3rb2 d1l1k3l1 d1sm3h1 d1q0xh1 d1ghfh1 d7fab11 d1lignh1  
d1l00h1 d4idla\_ d5c2b1\_ d1jrh11 d1l11a1 d3zhda1 d4kfcz\_ d1b0wa\_  
d1e6oh1 d1mexl1 d4krpb\_ d1fnsh1 d1ncwh1 d4hgma\_ d4eigb1 d4rzca\_  
d2mpa11 d4y5xa\_ d5en2b1 d3lrga1 d4ej1c1 d1rhha1 d1j05b\_ d1forh1  
d1q9wb1 d2wzpd\_ d2aq2a1 d1h0da1 d3revb1 d2ij0c1 d1tzh1 d4m7j11  
d1k6ql1 d3b9kc1 d1lign1\_ d3qeua1 d1dsfl\_ d1celh1 d1kcu1 d1zvha1  
d1zvoa1 d1tqbb1 d1ay1l1 d2qscl1 d2cgrh1 d1nl0h1 d1ken11 d3eo0a1  
d4n9ob1 d1n0xl1 d3k1kc\_ d1c4qa\_ d1prtc1 d2wv6d\_ d1prtf\_ d1ltrd\_  
d4l63b1 d1r4pb\_ d1prtd\_ d1t10f\_ d2bosa\_ d1prtb1 d3chbd\_ d2aq2b1  
d1ck1a1 d1lenfa1 d1i4pa1 d1v1oa1 d1et9a1 d1esfa1 d2g9hd1 d4ohja1  
d1klud1 d1bxta1 d1eu3a1 d1ty0a1 d1fnua1 d2cqva1 d1fhga\_ d2k1ma\_  
d2d12a1 d1biha3 d1biha1 d1biha4 d3qp3a1 d1g1ca\_ d1gxea\_ d1cvsc2  
d1cvsc1 d1xmwa2 d1m4ka2 d2otpa2 d1biha2 d1rhfa2 d2fcba2 d2fcba1  
d1wwbx\_ d1gsma2 d1epfa1 d1epfa2 d2dava1 d1waaa\_ d1f97a2 d1x44a1  
d1vcaa2 d1fnla2 d1fnla1 d3b5ha2 d3h8na2 d3h8na1 d1jbj1 d1pd6a\_  
d1f2qa2 d1f2qa1 d3cx2a\_ d1nbqa2 d3b5ha1 d1n26a1 d1xiwb\_ d1xaua\_  
d1fltx\_ d2ifga1 d1olla1 d1olla2 d1cs6a4 d1cs6a3 d1cs6a2 d1cs6a1  
d2gw5a2 d1sy6a1 d1xiwa\_ d1lucta2 d1lucta1 d1ry7b2 d1gl4b\_ d1qz1a3  
d1olza1 d2c9aa1 d1wwca\_

**Family-74 (c.55.3.5)**

**Positive dataset contains 15 protein sequences.**

d1s5ja1 d2hbja2 d2igia\_ d1wlja\_ d4dlea1 d2f96a1 d3tr8a1 d3mxma\_  
d1y97a1 d1w0ha\_ d2py5a1 d1yt3a3 d2guia\_ d3mwp1 d4kb1a\_

**Negative dataset contains 4103 protein sequences.**

d1m32a\_ d1libja\_ d1c7na\_ d1liuga\_ d4q75a\_ d2bkwa1 d1t3ia\_ d1n8pa\_  
d1qz9a\_ d1jff9a\_ d1leg5a\_ d1p3wa\_ d3kgwa\_ d1cl1a\_ d2ctza1 d1vjoa\_

d2rfva\_ dlgc0a\_ dlcs1a\_ d1d2fa\_ d2ch1a1 d1qgna\_ d1pffa\_ d1elua\_  
d1xfda2 d1u08a\_ d1lc5a\_ d1b5pa\_ d1bw0a\_ d3pd6a\_ d7aata\_ d2csta\_  
d1j32a\_ d1fg7a\_ d4wlha\_ d1o4sa\_ d1v2da\_ d1gdea\_ d1m6sa\_ d1v72a1  
d1svva\_ d1ajsa\_ d1wsta1 d2f8ja2 d1lk9a\_ d1vp4a1 d1xi9a1 d2gb3a1  
d1yaaa\_ d1xkta1 d2hfka\_ d1jmkc\_ d5d3ka\_ d1f56a\_ dlazca\_ d1ws8a\_  
d3u25a\_ d1cuoa\_ d1id2a\_ d1rkra\_ d2iaac\_ d4dp1x\_ d1nwpa\_ d2gima\_  
d2i7sa\_ d1qhqa\_ d3ehbb1 d1gyca3 d1hfua2 d1kbva1 d1kbva2 d1sdda1  
d1sdda2 d1gyca1 d1gyca2 d1mzya1 d2bw4a1 d1aoza1 d1aoza3 d1aoza2  
d1kyaa2 d1kyaa1 d1mzya2 d4e9sa1 d1sddb1 d1sddb2 d1hfua1 d1hfua3  
d1oela2 d1oela1 d1v10a2 d1v10a3 d1v10a1 d1rypd\_ d1irua\_ d1rypc\_  
d3unfk\_ d1rypa\_ d1j2pa\_ d1irui\_ d1j2qh\_ d3unfh\_ d1m4ya\_ d1rypb\_  
d1irul\_ d1irug\_ d1iru2\_ d1q5rh\_ d1rypg\_ d1g3ka\_ d1iruf\_ d1q5qa\_  
d1e94a\_ d1irub\_ d1ryph\_ d3ty6a\_ d1iruj\_ d1iruk\_ d1rype\_ d1irud\_  
d1irue\_ d3mi01\_ d1rypf\_ d2z3ba\_ d1iruc\_ d3mka2\_ d1irul\_ d2cfba1  
d1dfoa\_ d1o69a\_ d3k28a\_ d2bwpa\_ d3lg0a\_ d2fnua\_ d3ou5a\_ d1z7da1  
d1b9ha\_ d1iaya\_ d4msoa\_ d1bs0a\_ d1s0aa\_ d1sffa\_ d3tqxa\_ d1mdoa\_  
d3qboa\_ d3pgya\_ d1bjna\_ d2dkja\_ d1ejia\_ d1vefa1 d4wxga\_ d3bs8a\_  
d3gbxa1 d1w23a\_ d3kasa1 d3bi1a3 d3sxa1 d1j3qa\_ d4luka\_ d2bema\_  
d1pama1 d1ea9c1 d1qhoa1 d2fhfa2 d2fhfa1 d1k3ia1 d1j0ha1 d1cxl1a1  
d2bhua1 d1edqa1 d1f1sa2 d1ut9a2 d1txka1 d2phla2 d2phla1 d1fxza2  
d1lrha\_ d1uija1 g1dgw.1 d2v09a\_ d1uika2 d1uika1 d1dgwa\_ d1ep0a\_  
d2pa7a1 d1wlta1 d1nxma\_ d2c0za1 d1nepa\_ d1ds6b\_ d1fstb\_ d1g0da1  
d1ju8a\_ d1v70a\_ d2f4pa1 d1yhfa1 d1tafa\_ d1bh9b\_ d1tafb\_ d1jfib\_  
d1q9ca\_ d1h3ob\_ d2byka1 d1n1ja\_ d4g92b\_ d1bh9a\_ d1h3oa\_ d2bykb1  
d1n1jb\_ d1ydwa2 d2nvwa2 d1h6da2 d1zh8a2 d1qkia2 d1xeea2 d1tlta2  
d1r0ka3 d1j5pa3 d1vkoa2 d1vm6a2 d3qvsa2 d1gr0a2 d1p1ja2 d2ovga\_  
d1sq8a\_ d1rzsa\_ d3kz3a\_ d3orca\_ d3gpdg2 d2q49a2 d1hdgo2 d2g17a2  
d2cvoa2 d2czca1 d3pwka2 d1obfo2 d1i32a2 d1zyao2 d2pkqo2 d1b7go2  
d2hjsa2 d1cf2o2 d1vkna2 d1nvmb2 d1ux8a\_ d1dlya\_ d4i0va\_ d2bkma\_  
d1dlwa\_ d2bmma\_ d2msya\_ d2djoa1 d2r5za\_ d1au7a1 d1f43a\_ d21mda1  
d1akhb\_ d1s7ea1 d3nara\_ d1zq3p1 d2craa1 d1mija\_ d4uuta\_ d3a01a\_  
d1x58a1 d3rkqa1 d3cmya1 d2cqxa1 d2da6a1 d1fjla\_ d1mh3a1 d1ig7a\_  
d1x41a1 d1wh7a1 d1gt0c1 d2mw8a\_ d1lfup\_ d1x2ma1 d1b72a\_ d1wi3a1  
d1jgga\_ d1wjha1 d1x2na1 d1mnmc\_ d2cuea1 d3k2aa\_ d2hosa\_ d2jwta2  
d1pufa\_ d1octc1 d2hi3a\_ d1b8ia\_ d4j19a\_ d3lnqa\_ d1wh5a1 d1b8ib\_  
d1fexa\_ d2cqra1 d1ug2a1 d2cqqa1 d2ajea1 d4a69c\_ d1h8ac1 d2crga1  
d2iw5b1 d1xc5a1 d1ofcx1 d2cu7a1 d1wgxa1 d2cjja1 d2ckxa1 d1gvda\_  
d6paxa1 d6paxa2 d1k78a1 d1hlva1 d1iufa2 d1iufa1 d2iu5a1 d1zk8a1  
d2g7sa1 d2fd5a1 d2np5a1 d1z0xa1 d2id6a1 d2d6ya1 d2i10a1 d1vi0a1  
d2oi8a1 d3c07a1 d2ns7a1 d2fq4a1 d2yvea1 d1t33a1 d2o7ta1 d1rkta1  
d2np3b1 d2g7ga1 d2gena1 d2fbqa1 d2g7la1 d2gfna1 d2g3ba1 d2jj7a1  
d2hyja1 d1sgma1 d1ui5a1 d2hkua1 d2id3a1 d4jyka1 d1b10a2 d1d5ya1  
d1d5ya2 d3lv8a\_ d1s3ga1 d1zaka1 d1s4qa\_ d3tvta2 d1uf9a\_ d1khta\_  
d1osna\_ d1p5zb\_ d4tmka\_ d3cm0a\_ d1tmka\_ d1jaga\_ d3h86a\_ d1t0hb\_

d1nn5a\_ d2h92a\_ d3kb2a1 d2c95a1 d1yj5a2 d1kgda\_ d1ly1a\_ d2ak3a1  
d1vyva2 d1deka\_ d2grja1 d1p3ja1 d1y63a\_ d1e4ya1 d1s96a\_ d3iija1  
d1lvga\_ d1nksa\_ d1vyua2 d4e22a\_ d1qf9a\_ d1jjva\_ d1q3ta\_ d1ki9a\_  
d1lw7a2 d1teva\_ d1kjwa2 d1gsia\_ d2iyva2 d1kaga\_ d1e6ca\_ d1g3ma\_  
d1j99a\_ d1t8ta1 d1nsta\_ d1fmja\_ d1zrha\_ d1ls6a\_ d2a3ra\_ d2zptx\_  
d3ckla\_ d1texa\_ d1q44a\_ d2gwaha\_ d1odfa\_ d1uj2a\_ d4gi7a\_ d2jeoa1  
d1rz3a\_ d1z0ja1 d3umra2 d3gj0a1 d2gaoa1 d1yzga1 d1x3sa1 d1g7sa4  
d1puja\_ d1udxa2 d1kk1a3 d2o52a\_ d1jwyb\_ d1zcaa2 d1zcba2 d2fv8a1  
d2cjwa\_ d3dz8a1 d1xzpa2 d1vg8a\_ d4qxaa\_ d2ew1a1 d1x1ra1 d2bcgy\_  
d3doea1 d3cona\_ d3rega\_ d3wyga\_ d1upta\_ d2b6ha1 d1zd9a1 d1r5ba3  
d1n0ua2 d1r2qa\_ d2f91a1 d2rhda\_ d3q3jb\_ d3q85a\_ d1efma1 d1r8qa\_  
d2gf9a1 d2akab1 d1ek0a\_ d1z08a1 d2gcoa1 d2dy1a2 d4g01b\_ d2cxxa1  
d1svia\_ d3q72a\_ d1ni3a1 d4ac9a4 d2erxa1 d2bmea\_ d1wxqa1 d2gf0a1  
d4ldja1 d1zunb3 d1d5ca\_ d4lv5b\_ d1efca3 d1kmqa\_ d2g6ba1 d3lrpa\_  
d1tada2 d2y8ea\_ d4rd4a1 d1z06a1 d2heia\_ d3a58b\_ d1u01a2 d1d2ea3  
d1zj6a1 d2ocba\_ d3rwoa\_ d1mr3f\_ d2e9sa1 d4u5xa1 d2iwra\_ d2fn4a1  
d3bwdd\_ d2nzja1 d2atva1 d2ksqa\_ d3l43a\_ d1mkya2 d1mkya1 d1wmsa\_  
d1jnya3 d2rmka\_ d1f6ba\_ d1f60a3 d1gota2 d1jala1 d2fh5b1 d1g16a\_  
d2wblc\_ d1m7ba\_ d1wf3a1 d1f5na2 d1t9ha2 d1z6xa1 d1z0aa1 d2fg5a1  
d2a5ja1 d2bcjq2 d1s0ua3 d1ky3a\_ d4y0va\_ d4lhwa\_ d2qmea1 d2atxa1  
d1legaa1 d1ryha\_ d1moza\_ d1nrjb\_ d2erya1 d3bfka\_ d1puia\_ d1fzqa\_  
d3j3az1 d3t5ga\_ d1shza2 d3defa\_ d2f7sa1 d3raba\_ d3tsoa\_ d3aq4a\_  
d2a17a1 d3sfva1 d3bc1a\_ d2ncda\_ d1sdma\_ d3h4sa1 d2heha\_ d2grya\_  
g3kin.1 d1kk8a2 d1br2a2 d1goja\_ d1f9va\_ d2mysa2 d1lkxa\_ d3t0qa\_  
d4db1a1 d3gbja\_ d1ry6a\_ d1v8ka\_ d1y4wa1 d1g99a2 d2elza2 d2elza1  
d1saza1 d1saza2 d1iqca2 d1iqca1 d1eb7a1 d1nmla2 d1nmla1 d1qksa1  
d1hroa\_ d4gedb\_ d3zooa\_ d1mz4a\_ d1gu2a\_ d1f1fa\_ d1dvva\_ d1c6ra\_  
d1c75a\_ d1e29a\_ d1gdva\_ d1cnoa\_ d1h32b\_ d1co6a\_ d2bh4x\_ d2aiua\_  
d5cytr\_ d1jdl1a\_ d1i8oa\_ d2zboa\_ d3dmia\_ d1ls9a\_ d1wvec\_ d2yk3a\_  
d3ph2b\_ d1dw0a\_ d5aura\_ d1q13a\_ d1qn2a\_ d1f1ca\_ d2nqya\_ d1h4ga\_  
d1hixa\_ d1oa2a\_ d1olra\_ d3b7ma\_ d4h7ma1 d3wp3a\_ d2vgda\_ d1igoa\_  
d3zsea\_ d2nlra\_ d3wx5a\_ d1oa3a\_ d1pvxa\_ d1m4wa\_ d1f5ja\_ d1oa4a\_  
d1ks5a\_ d4ix1a1 d3sita1 d2ah2a1 d1n1ta1 d1evsa\_ d1cnt1\_ d1pvhb\_  
d1z7ca\_ d1huwa\_ d1bgea\_ d1rhga\_ d1f6fa\_ d1f45b\_ d1i1rb\_ d1axia\_  
d1letea\_ d3tgxb\_ d1scfa\_ d2z3qa1 d3qb1a\_ d1hula\_ d4nkqb\_ d1eera\_  
d1v7mv\_ d5e4ea\_ d2o27a\_ d3b5ka\_ d2psma1 d4zf7a\_ d3uf5a\_ d4x51a\_  
d4ypgc1 d3oq3a\_ d1lqsl\_ d1n1fa\_ d1aula\_ d1wu3i\_ d3bes1\_ d3ux9a\_  
d1v8fa\_ d2ejca\_ d3muea1 d1lihoa\_ d3q12a1 d3rbaa\_ d2qtra\_ d1nupa\_  
d3l92a\_ d1f9aa\_ d1qjca\_ d2h29a\_ d1vlha\_ d1lw7a1 d1mrza2 d4ruka\_  
d2el7a\_ d1iq0a2 d1irxa2 d1r6ta2 d1livsa4 d2cyba\_ d1rqga2 d1j09a2  
d2yxna\_ d1f7ua2 d1h3fa1 d1ffya3 d2g36a1 d1nzja\_ d1jila\_ d1n31a\_  
d1i61a\_ d1pfva2 d1h3na3 d3n9ia\_ d3sz3a1 d3sw2a\_ d1moxc\_ d1dx5i3  
d1ledmb\_ d1aut12 d1aut11 d1nqlb\_ d1dval1 d1szba2 d1kigl\_ d2y5f1\_  
d1ijqa2 d1gk5a\_ d1g1sa2 d1nt0a3 d1lmja2 d1lmja1 d1nzia2 d2wphe\_

d1kli1\_ d1pfx12 d1pfx11 d1p9ja\_ d1g1ta2 d1f7ea\_ d4yzub\_ d1nuba2  
d2y5ia\_ d1qlsa\_ d1psra\_ d3n22a\_ d2egda\_ d4ggfc\_ d2wcea\_ d2luca\_  
d4aqia\_ d3nsia\_ d2lp3a\_ d1j55a\_ d1a4pa\_ d1nsha\_ d1pvaa\_ d3fs7a\_  
d1ttxa\_ d1rwya\_ d2kyfa\_ d1rk9a\_ d1a75a\_ d1exra\_ d1tiza1 d1nyaa\_  
d1g8ia\_ d1ggwa\_ d1wdcc\_ d3fwba\_ d1ggza\_ d2o5ga\_ d1ctaa\_ d1m45a\_  
d3i5gc\_ d1s18a\_ d1fpwa\_ d2scpa\_ d2roaa\_ d4aqra\_ d3pn7b\_ d1br1b\_  
d2mysb\_ d1s6ca\_ d1bjfa\_ d2obha\_ d1jfka\_ d1j0a\_ d1qv0a\_ d1lkja\_  
d2mlfc\_ d2m97a\_ d2d8na\_ d4by5a\_ d1jbaa\_ d4nqga\_ d1wdcb\_ d2mysc\_  
d1j7qa\_ d1s6ia\_ d1uhka2 d1r2ua\_ d1dtla\_ d3kf9a\_ d3pn7c\_ d1qjta\_  
d1fi6a\_ d1c07a\_ d5d67d\_ d1tuza\_ d1h8ba\_ d1eg3a2 d2zkmx1 d1snla\_  
d1gjya\_ d1y1xa\_ d1hqva\_ d1dvia\_ d1df0a1 d4usla\_ d1k94a\_ d1wkya2  
d1uuqa\_ d3wh9a\_ d4m1ra\_ d1xyza\_ d4xuya\_ d2je8a5 d4bf7a1 d3cuia\_  
d1ur4a\_ d1qw9a2 d1odza\_ d2vzsa5 d1bqca\_ d2x2ya1 d1hjqa\_ d1qnra\_  
d4y7ea1 d1vjza\_ d4k68a\_ d2v3ga\_ d4hpga\_ d1nofa2 d1nq6a\_ d1h4pa\_  
d1aq0a\_ d3ziza\_ d4bs0a\_ d1ecea\_ d1h1na\_ d1ta3b\_ d1w91a2 d1i1wa\_  
d1uhva2 d1us3a2 d1egza\_ d7a3ha\_ d1tvna1 d3nyda1 d1ghsa\_ d2cyga1  
d4xv0a\_ d2c8na2 d1w32a\_ d3emca\_ d1v6ya1 d1foba\_ d2uwfa1 d2fgla\_  
d3niya1 d2c0ha1 d1rh9a1 d1yq2a5 d1szna2 d1fa2a\_ d1pama4 d5do8a1  
d1ea9c3 d1hx0a2 d2fhfa5 d1qhoa4 d1avaa2 d1m53a2 d4m8ua1 d2gjpa2  
d1lwha2 d4howa1 d1ktba2 d1j0ha3 d3vm5a1 d2x1ia\_ d1wzaa2 d1uasa2  
d2diea1 d1mxga2 d1ht6a2 d1liv8a2 d5cpsa\_ d1ud2a2 d1zjaa1 d3gbea1  
d1kwa2 d1wdpa\_ d1gcya2 d1g5aa2 d1hvxa2 d3dhp2 d2bhua3 d4do4a1  
d3qgva1 d1e43a2 d1g94a2 d2d3na2 d1gjwa2 d1gvia3 d1x1na1 d1r7aa2  
d1tz7a1 d4c7ga2 d2gjxa1 d1jaka1 d1yhta1 d4toqa\_ d1wb0a1 d1w9pa1  
d1eoka\_ d1itxa1 d1kfwal d1goia2 d1edqa2 d2gsja\_ d1hjxa1 d1jnda1  
d1vf8a1 d3wdpp1 d3wq5a\_ d1gnxa\_ d4gxpa\_ d4hz8a\_ d1e4mm\_ d3aiua\_  
d1wcga1 d3ahxa\_ d1v02a\_ d2dgaa\_ d1pbga\_ d1vffa1 d1qoxa\_ d4ha4a\_  
d1mixa2 d1e5wa2 d1j19a2 d1isna2 d2a16b2 d3syxa1 d1mkea1 d2p8va\_  
d1xoda1 d1evha\_ d1qc6a\_ d1legxa\_ d2y8ga\_ d1xkea1 d2y8fa\_ d1b9ra\_  
d1offa\_ d1frra\_ d3wcqa\_ d1e9ma\_ d1l5pa\_ d1wria\_ d1i7ha\_ d3av8a\_  
d1czpa\_ d1rfka\_ d3p1ma1 d3b2ga\_ d2bt6a2 d1wgqa1 d1v89a1 d2coda1  
d1zc3b\_ d1wg7a1 d1u5ea1 d1v61a1 d2coca1 d2ys1a1 d1v5pa1 d1ntya2  
d1wjma1 d1wi1a1 d1u29a\_ d1xx0a1 d1unqa\_ d2zkmx3 d1fhoa\_ d1v88a1  
d2adza1 d1x1fa1 d1p6sa\_ d2coaa1 d1btka\_ d1v5ma1 d1faoa\_ d2x18a\_  
d1dyna\_ d1x1ga1 d4kaxb\_ d2j59m1 d1ki1b2 d1xcga2 d1txda2 d1u5da1  
d1dbha2 d1wlha\_ d1upqa\_ d1v5ua1 d1foea2 d2fjla1 d1eaza\_ d2dfka2  
d2cofa1 d1kz7a2 d1h6ua1 d9l1da1 d2ewda3 d1up7a1 d2dfda1 d1s6ya1  
d1vjta1 d7mdha1 d1hyea1 d1t2da1 d1ojsa3 d1ldna1 d1hyha1 d1civa1  
d2a92a1 d1ez4a1 d1i0za1 d1y6ja1 d1gv0a1 d1ur5a1 d1l1da1 d1lobba1  
d1v8ba1 d1l7da1 d2d1da1 d1mx3a1 d1ygya1 d1qp8a1 d1li4a1 d1j4aa1  
d2naca1 d1npya1 d3t4ea2 d1a4ia1 d1o0sa1 d2hk9a2 d2egga2 d1b26a1  
d1bvua1 d1gq2a1 d1c1da1 d1leha1 d1gtma1 d1euza1 d3dona2 d1ledza1  
d1gpja2 d1vi2a1 d1p77a1 d1nyta1 d1b0aa1 d1vl6a1 d1v91a1 d1txga2  
d3f47a1 d1mv8a2 d2pv7a2 d1xc2a3 d2ahra2 d4xiya1 d2f1ka2 d1pgja2

d1i36a2 d1np3a2 d1lj8a4 d1teaa3 d1qmg2 d2i76a2 d2g5ca2 d1wdka3  
d1dlja2 d3cuma3 d1kola2 d1f8fa2 d1qora2 d1jqba2 d1vj0a2 d1cdoa2  
d1gu7a2 d1d1ta2 d1xa0a2 d2dm6a2 d1jvba2 d1llua2 d1h2ba2 d1tt7a2  
d1piwa2 d1o89a2 d1liz0a2 d1e3ja2 d1yb5a2 d1uufa2 d1vj1a2 d1e3ia2  
d3gpdg1 d2nvwa1 d1u8fo1 d1ydwa1 d1hdgo1 d2g17a1 d1cf2o1 d2czca2  
d1r0ka2 d1obfo1 d2cvoa1 d1ebfa1 d1h6da1 d1i32a1 d1zh8a1 d2q49a1  
d1qkia1 d1j5pa4 d3pzra1 d1xeaa1 d1vkoa1 d1vm6a3 d3qvsa1 d2pkqo1  
d1b7go1 d1gr0a1 d1p1ja1 d1lc0a1 d1j0xo1 d3pwka1 d2hjsa1 d1zyao1  
d1vkna1 d1t1ta1 d1nvmb1 d3sjua\_ d3ojfa1 d1xu9a1 d2jjya1 d1n7ha\_  
d1y1pa1 d1h5qa\_ d1jtva\_ d4fs3a\_ d2bkaa1 d1gy8a\_ d2c5aa1 d1ulsa\_  
d1ooea\_ d2b69a1 d1y5ma1 d1spxa\_ d1ae1a\_ d1bxka\_ d1ydea1 d1gega\_  
d1hdoa\_ d1o5ia\_ d1e6ua\_ d1snya1 d2rhca\_ d3zv4a\_ d5ceja\_ d2d1ya1  
d1fjha\_ d3w8ea\_ d2fmua1 d1x1ta\_ d1rpna\_ d3ay7a1 d1k2wa\_ d1eq2a\_  
d2hrba1 d3ruaa\_ d2ew8a1 d4hwka\_ d1xgka\_ d2bd0a1 d1yo6a1 d2a35a1  
d2ntva\_ d1vl8a\_ d1hdca\_ d4bkua\_ d2ag5a1 d2q45a\_ d1nffa\_ d4iy1a\_  
d1zbqa1 d1kewa\_ d1ek6a\_ d1ja9a\_ d2q46a2 d1iy8a\_ d1cyda\_ d2ptga\_  
d1hxha\_ d1uzma1 d3lyla\_ d4m89a\_ d3wyea\_ d2blla1 d1w6ua\_ d1sb8a\_  
d2q2va\_ d4nr0a\_ d1e6wa\_ d2gasa\_ d3oiga1 d2bgka1 d1mxha\_ d1vl0a1  
d1rkxa\_ d1r6da\_ d1wmaa1 d1e7wa\_ d2c07a1 d1xkqa\_ d3tzha\_ d1g0oa\_  
d3lz6a\_ d1qyca\_ d1edoa\_ d1gz6a\_ d1oc2a\_ d1zema1 d2xoxa\_ d1z45a2  
d1geea\_ d1p33a\_ d3lt0a\_ d4e6pa\_ d2wyua\_ d1db3a\_ d4q9na\_ d1xhla\_  
d4o1ma\_ d1fmca\_ d2uvda\_ d2gdza1 d1uaya\_ d2z1ma\_ d2o23a2 d2fr1a2  
d2fr1a1 d1qsga\_ d1qyda\_ d4zjua\_ d2a4ka1 d1yb1a\_ d1wvga1 d1yxma1  
d3f4ba\_ d1mg5a\_ d1xg5a1 d1t77a2 d2w0pa\_ d2diaa1 d2e9ia2 d2e9ja1  
d2dj4a1 d2eeba1 d2diba1 d2dmba1 d2dmca1 d2d7oa1 d2ee6a1 d2d7pa1  
d2eeaa1 d2di8a1 d1wlha1 d2d7na1 d2nqca\_ d2d7ma1 d2dica1 d3cnka\_  
d2k3ta1 d2eeca1 d1qfha2 d2bp3a1 d1v05a\_ d2ee9a1 d2eeda1 d2di9a1  
d1t3ca\_ d1epwa3 d2a97a\_ d3fiea\_ g1e1h.1 d3ioqa\_ d1fh0a\_ d1o0ea\_  
d1khqa\_ d1m6da\_ d2cb5a\_ d1cs8a\_ g8pch.1 d1s4va\_ d2pnsa\_ d1vsna1  
d1mira\_ d1iwda\_ d2oula\_ d7pcka\_ d3bwka\_ d3bcna\_ d2p86a\_ d1pvja\_  
d1pcia\_ d1gece\_ d1deua\_ d4bs6a\_ d1xkga1 d1cqda\_ d1jqpa2 d2c0ya\_  
d2bdza\_ d3p5ua\_ d2o36a\_ d1k9xa\_ d1zoya1 d1d4ca2 d1chua2 d1jnra2  
d1kf6a2 d2jk6a2 d2jk6a1 d1feca1 d1feca2 d1lpfa1 d1lpfa2 d1xhca1  
d1xhca2 d1dx1a2 d1dx1a1 d1gera2 d1m6ia2 d1onfa1 d1onfa2 d3lada2  
d3lada1 d1w4xa1 d1w4xa2 d1gesa2 d1mo9a1 d1xdia1 d1fl2a2 d1fl2a1  
d1fcda1 d1fcda2 d1h6va2 d1h6va1 d1mo9a2 d1gv4a2 d1gv4a1 d2gv8a2  
d2gv8a1 d1aoga1 d1aoga2 d1hyua1 d1ebda1 d1ebda2 d3dk9a1 d1q1ra2  
d1q1ra1 d1gesa1 d1pn0a1 d1reoa1 d1ju2a1 d2f5va1 d3c96a1 d2gmha1  
d1pj5a2 d1gpea1 d1o5wa1 d1n4wa1 d1k0ia1 d2dw4a2 d2ivda1 d2voua1  
d1kdga1 d1xl4a1 d3vsqa\_ d2gixa1 d1p7ba1 d1js9c\_ d1f15b\_ d1za7a\_  
d1laja\_ g1apy.1 d3ljqa\_ g1k2x.1 d2v76a\_ d1wj1a1 d1aqca\_ d1qqga2  
d1ntva\_ d1n3ha\_ d4dbba\_ d3f0wa1 d1p3ra\_ d1wgua1 d2cy4a1 d3hqca\_  
d1wvha1 d1xr0b1 d4iuaa3 d4bvva\_ d5hpga\_ d3k65a\_ d1ki0a3 d1ki0a2  
d1ki0a1 d1a0ha1 d1pmla\_ d3sp8a3 d2feba1 d3nvva1 d1krha3 d2h88b1

d1n62a2 d1t3qa2 d1kf6b2 d1zoyb1 d1jq4a\_ d1ffva2 d1rm6c2 d1k8ka2  
d1k8ka1 d3uleb1 d3i33a2 d3i33a1 d1bupa1 d1dkgd2 d1dkgd1 d4ci6a2  
d1jcfal d4a2ba2 d2fxua1 d1yaga2 d1yaga1 d4cbua2 d1bupa2 d1r7ha\_  
d1faaa\_ d1wika1 d1xfla\_ d1ttza1 d2f51a1 d1ti3a\_ d1nhoa\_ d1sena\_  
d2i4aa\_ d1ep7a\_ d1zmaa1 d1fo5a\_ d3lefa1 d3diea1 d2yana1 d1z6na1  
d1oaza\_ d3zywa1 d4aj8a\_ d1nm3a1 d4fiwa\_ d1wmja\_ d4hs1a1 d1liloa\_  
d1xwaa1 d1wjka1 d2vm1a\_ d1fb6a\_ d1gh2a\_ d1h75a\_ d1nw2a\_ d1kx5b\_  
d3a6na\_ d4m6ba2 d2nqbd\_ d3wkjd\_ d2yfwe\_ d4h9na\_ d5bnxa\_ d1kx5c\_  
d3r45a\_ d1eqzb\_ d4jjnb\_ d1f66c\_ d1eqza\_ d4wnnb\_ d1kx5a\_ d1u35c1  
d1id3a\_ d2nqbc\_ d1kx5d\_ d1f1ea\_ d1b67a\_ d2b5ea2 d2b5ea3 d2b5ea1  
d2b5ea4 d2kp1a1 d2kp2a1 d1hyua3 d1hyua4 d1j08a1 d1pd212 d1nhya2  
d2a2ra2 d1k0dd2 d1f2ea2 d1gsua2 d1f3ba2 d2fhea2 d2pvqa1 d1tw9a2  
d1oyja2 d1e6ba2 d1k0ma2 d3ik7a1 d4is0a1 d1r5aa2 d1jlva2 d1m0ua2  
d3gtub2 d1z9ha2 d1okta2 d1axda2 d2gsra2 d1tu7a2 d1k3ya2 d1zgm1  
d1b48a2 d1gnwa2 d1gwca2 d2gsta2 d1glqa2 d1oe8a2 d1pn9a2 d1v2aa2  
d1fwla2 d1duga2 d3vrda1 d3vrda2 d1fcdc2 d1fcdc1 d1h1oa2 d1h1oa1  
d1m70a2 d1a0rp\_ d1ig8a1 d1czan2 d1czan3 d1czan1 d1ig8a2 d1czan4  
d1bg3a3 d1bg3a2 d1bg3a1 d1741a\_ d1691a\_ d2o4wa\_ d1p37a\_ d1k28a3  
d1xjta1 d1jtma\_ d2f2qa\_ d4e97a1 d3w3ea\_ d4tx7a\_ d3cq1a\_ d4msta\_  
d3iwra\_ d1dxja\_ d2z37a\_ d4dyga\_ d2za0a\_ d2c21a1 d2pjsa1 d1k11a\_  
d2i7ra1 d1e1csa\_ d1xqaa1 d5cj3a1 d1npba\_ d1jifa\_ d2p7oa\_ d1nkia\_  
d1mpya2 d1kw3b2 d1kw3b1 d4ghga1 d1tfza1 d3isqa1 d3isqa2 d1sqia1  
d1sqia2 d1lkda1 d1mpya1 d1cjxa2 d1cjxa1 d1sp9b2 d1t47a1 d1t47a2  
d1f1ua2 d1sp8a1 d1sp8a2 d1f1ua1 d1etob\_ d1g2ha\_ d1iyka2 d1rxta1  
d1iica2 d1iica1 d1qsta\_ d2beia1 d4m3sa\_ d1u6ma1 d1ygha\_ d1yk3a1  
d3dr6a\_ d1xmta\_ d1z4ea1 d2ge3a1 d2fiaa1 d2jdca1 d1y9wa1 d3to7a\_  
d1wwza1 d2f14a1 d2ozua1 d2b5ga\_ d2cy2a1 d2p0wa\_ d1cm0a\_ d4pswa\_  
d1yrea1 d1yr0a1 d1m4ia\_ d2gana1 d1yvka1 d1ghea\_ d2g3aa1 d1y7ra1  
d2euia1 d1q2ya\_ d2fsra1 d1xeba\_ d2ae6a1 d1cjwa\_ d1qsm1a\_ d2aj6a1  
d1y9ka1 d1i12a\_ d1vkca\_ d2atra1 d1n71a\_ d2d4pa1 d2fiwa1 d2fe7a1  
d1tiqa1 d2ou2a\_ d1yx0a1 d2fcka1 d1p0ha\_ d2j8ma\_ d2pq8a\_ d1z4ra1  
d1s3za1 d1ufha\_ d1ax4a\_ d1c7ga\_ d2v1pa1 d2ez1a\_ d1xvqa1 d1pn0a2  
d3hy2a\_ d2cvba1 d1o8xa\_ d1lu4a\_ d1we0a1 d2bmx1a1 d2a4va1 d1psqa\_  
d1xiya1 d1q98a\_ d1n8ja\_ d1zofa1 d2ggta\_ d3tjja\_ d4je1a1 d3s9fa\_  
d2zcta\_ d1qmva\_ d1jfua\_ d2b1ka\_ d5dvba1 d2b5xa1 d2v2ga\_ d1st9a\_  
d3tb2a\_ d4llra\_ d4fh8a1 d1e2ya\_ d1knga\_ d2h30a\_ d1i5ga\_ d2z9sa\_  
d2f8aa1 d1tp9a1 d2b7ka\_ d1nm3a2 d3hvva\_ d2wfca1 d4kcea\_ d1xvwa1  
d4gqca1 d3qpma\_ d4k1fa\_ d1zzoa1 d1gp1a\_ d1prxa\_ d4od7a1 d1z6ma1  
d4mcua1 d4dvca1 d1r4wa\_ d3l9sa\_ d3rppa\_ d2m5ta\_ d1cqqa\_ d1wqsa\_  
d5bpea\_ d2ipha\_ d1lvoa\_ d2bhga1 d3tnta\_ d3sjia\_ d3d23a1 d2fyqa\_  
d3tloa\_ d3zvea1 d2hrva\_ d3q3ya1 d4asha1 d1etha2 d1w52x1 d2ppla1  
d1hpla2 d1lpbb2 d2oxea1 d1rp1a2 d1ys1x\_ d4hs9a\_ d1ispa\_ d1ex9a\_  
d1ku0a\_ d3qmma\_ d1bbua1 d1e1oa1 d1c0aa1 d1b8aa1 d1l0wa1 d3a74a1  
d1eova1 d1lgya\_ d4l3wa\_ d1llfa\_ d1gz7a\_ d1lukca\_ d1jlia\_ d2rhwa\_



d2ftba\_ d1pmpa\_ d2rcqa1 d1fdqa\_ d4lkpa\_ d1sa8a\_ d1vyfa\_ d1lpja\_  
d3vg7a1 d4azqa1 d1o8va\_ d5bvqa\_ d1p6pa\_ d2qo4a\_ d1opba\_ d1yiva1  
d1o1va\_ d4bvma1 d4tkba\_ d4i3ba\_ d1ftpa\_ d1ggla\_ d4gkca\_ d1cbia\_  
d3p6da1 d1kqwa\_ d2a0aa1 d1xwdc1 d3kj4a\_ d1w8aa\_ d2ifga3 d1p9ag\_  
d1xkua\_ d3p0ya1 d1igra2 d1n8yc2 d1n8yc1 d1m6ba2 d1m6ba1 d1dzka\_  
d4tlja\_ d2a2ua\_ d4wfva\_ d3t1da\_ d4iaxa\_ d3zq3a\_ d2nnda\_ d1i4ua\_  
d1kxoa\_ d1bbpa\_ d1kt7a\_ d1exsa\_ d3s26a1 d1lf7a\_ d1qfta\_ d4gh7a\_  
d1z24a1 d1qabe\_ d1xkia\_ d1ew3a\_ d3bx7a\_ d4iawa1 d1n0sa\_ d1gkab\_  
d3kzaa\_ d2k23a\_ d2l9ca1 d2joza1 d1gm6a\_ d3kffa\_ d3saoa1 d1e5pa\_  
d1yupa1 d1iiua\_ d1jgta2 d1ea0a3 d1ecfa2 d1q15a2 d1ct9a2 d1ao0a2  
d1te5a\_ d2tbvc\_ d1c8nc\_ d1x36a\_ d1smvc\_ d1ng0c\_ d4sbvc\_ d1lopa\_  
d1f2nc\_ d1cixa\_ d1y29a\_ d1v7fa\_ d2jtba\_ d1d1ha\_ d1g9pa\_ d1lupa\_  
d1qk7a\_ d1mb6a\_ d2a2va\_ d1niya\_ d1i25a\_ d1hvwa\_ d2mpqa\_ d1ie6a\_  
d1kqha\_ d1la4a\_ d2mxoa1 d1d10a\_ d1koza\_ d1qk6a\_ d1emxa\_ d1lgra\_  
d1c6wa\_ d1rmka\_ d1ixta\_ d1eyoa\_ d1cna\_ d1fu3a\_ d1g1pa\_ d1f3ka\_  
d1fyga\_ g1f8v.1 d1novc\_ d1ny721 d1ny722 d1a6ca3 d1a6ca2 d1pgl22  
d1pgl21 d1pgl11 d1ny711 d1mqta\_ d1d4m3\_ d1fmd3\_ d2mev1\_ g1aym.1  
d1ev13\_ d4q4w1\_ d1r1a3\_ d2x5ia\_ g1r1a.1 g1d4m.1 g1rhi.1 d1b35b\_  
d1lopa\_ d1tme1\_ d4iv1a\_ g1pvc.1 g1fpn.1 d1fpn1\_ d4gb31\_ d1d4m1\_  
d1fmd1\_ d1ev11\_ d2wzr3\_ g1cov.1 d1qqp3\_ g1fmd.1 d2x5ic\_ d1rhi3\_  
g1oop.1 d1hxs1\_ g1hxs.1 d1fpn3\_ d1bev1\_ g2mev.1 d1eah3\_ d1aym1\_  
d1pvc3\_ d1qqp1\_ d1zba3\_ d1h8ta\_ d3vbhc\_ g1b35.1 g1bev.1 d1hxs3\_  
g1ev1.1 d1bev3\_ g1tmf.1 d1tmf1\_ d1b35a\_ d2mev3\_ g1eah.1 g1h8t.1  
d1eah1\_ d4q4w3\_ d1r1a1\_ d1aym3\_ d1pvc1\_ d1zba1\_ d1h8tc\_ d1loopc\_  
d1tme3\_ g1qqp.1 d4iv1c\_ g1tme.1 d1y14b1 d2nn6i1 d1i941\_ d2zjra2  
d1smxa\_ d2qamc2 d1hh2p1 d2r7da1 d1rl2a2 d1wfqa1 d3bzka4 d1x6oa2  
d3a0ja\_ d2j01d2 d2ja9a1 d4q15a\_ d1hr0w\_ d1luza\_ d2n3sa\_ d2vnud1  
d1h95a\_ d1go3e1 d2nn6h1 d1ne3a\_ d2mola\_ d1iz6a2 d1jjga\_ d1e3pa2  
d2ix0a3 d2ix0a2 d2lxja\_ d1ueba3 d1ueba2 d2z0sa1 d1u01a1 d2ix0a1  
d2je6i1 d3i2za1 d2c35b1 d2ahob2 d1t9ha1 d3i4oa\_ d2qall1 d1jt8a\_  
d2nn6g1 d1g6pa\_ d3cama\_ d1i94q\_ d1c9oa\_ d1d7qa\_ d2ba0a1 d2vnud2  
d2vnud3 d1khia2 d2qalq1 d1wi5a1 d1xta2 d1ny4a\_ d4w9ta\_ d1jvna1  
d4x2ra1 d1ka9f\_ d4axka1 d1thfd\_ d1h5ya\_ d4u28a\_ d2y88a\_ d4wd0a\_  
d1vzwa1 d1eixa\_ d3exra\_ d2ffca1 d2fdsa1 d3n3ma1 d2czda\_ d1q6oa\_  
d2yyua\_ d1vqta1 d1dbta\_ d3ldva1 d2flia1 d1h1ya\_ d1tqja\_ d1tqxa\_  
d41t9a1 d3tc7a1 d3hoja\_ d1i4na\_ d3vnda\_ d3n18a1 d1geqa\_ d3naval  
d1v5xa\_ d4a2ra1 d3tc6a1 d1ujpa\_ d4ijba\_ d1xcfa\_ d1vc4a\_ d1rd5a\_  
d1qopa\_ d3b5va\_ d2r80b\_ d1cqxa1 d1cg5a\_ d1gcvb\_ d3boma\_ d2h8fb\_  
d2raoa\_ d3bj1a\_ d4hrrb\_ d2r50a\_ d3d1kb\_ d2aa1b1 d3zhwa\_ d3hf4b\_  
d3gdja\_ d1jebb\_ d3bj1b\_ d1x9fb\_ d1wmub\_ d1gcva\_ d3bcqb\_ d3d4xb\_  
d1gvha1 d2dc3a\_ d3hf4a\_ d4yu3a\_ d3k8ba\_ d1qpwb\_ d2r80a\_ d3bcqa\_  
d1v4wa\_ d3wtgb\_ d1j17a\_ d4esaa\_ d1a9we\_ d3d1ab\_ d1fsla\_ d4h21a\_  
d1v4wb\_ d1mwca\_ d1vhba\_ d1jeba\_ d1spgb\_ d1h97a\_ d1q1fa\_ d1tu9a1  
d3d1aa\_ d1hdsb\_ d3hyub\_ d2zfb\_ d3fs4a\_ d1oj6a\_ d1shrb\_ d4h21b\_

d4yu3b\_ d1spga\_ d3hrwa\_ d3qqra\_ d3at5a\_ d4wchd\_ d3hyua\_ d1cg5b\_  
d1uc3a\_ d1hbra\_ d2raob\_ d1outb\_ d4esab\_ d3gdjb\_ d3qqqa\_ d1x9fc\_  
d3vrf\_ d1litha\_ d3mkba\_ d3d4xa\_ d3mjpa\_ d1j16a\_ d3fh9a\_ d1outa\_  
d2dc3b\_ d1lit2a\_ d3eoka\_ d3g46a\_ d1qpwa\_ d3vrfb\_ d1ch4a\_ d1x9fd\_  
d1hdsa\_ d2zfa\_ d3mkbb\_ d1or4a\_ d3wtga\_ d1a4fa\_ d3fh9b\_ d3bomb\_  
d3cy5a\_ d3at5b\_ d1x9fa\_ d2oifa\_ d4lmb\_ d1cpcb\_ d3v57a\_ d1kn1a\_  
d1cpca\_ d4f0ta\_ d2vjha\_ d4po5b\_ d1eyxa\_ d1alla\_ d4f0tb\_ d1b33b\_  
d1b8db\_ d4h0mb\_ d1b33a\_ d2vjhb\_ d4l6b\_ d2vmlb\_ d1allb\_ d2vjta\_  
d3dbja\_ d2vmla\_ d2vjtb\_ d4f0ub\_ d1f99b\_ d4rmpa1 d1liaa\_ d1eyxb\_  
d2uulb\_ d4lmsb\_ d4f0ua\_ d2bv8a\_ d1f99a\_ d2bv8b\_ d2c7lb\_ d3dbjb\_  
d4rmpb1 d1b8da\_ d4h0ma\_ d3v57b\_ d1kn1b\_ d1liab\_ d2uula\_ d2j96a\_  
d1f00i3 d1k8qa\_ d2xqfa\_ d1ea5a\_ d1f6wa\_ d1dx4a\_ d1qe3a\_ d1k4ya\_  
d4qwwa\_ d2ha2a\_ d1r88a\_ d1sfra\_ d1f0na\_ d4qeka\_ d1jmx2 d1jmx1  
d1pbya2 d1jmx3 d1pbya3 d1pbya4 d1s5ja2 d1qhta2 d4dlea2 d1tgoa2  
d3py8a2 d1q8ia2 d1kfsa2 d2py5a2 d1d5aa2 d1f74a\_ d3l21a\_ d2e1da\_  
d1to3a1 d1w3ia\_ d1sfla\_ d1n7ka\_ d1vcva1 d4imea\_ d1wa3a\_ d2ocza1  
d1f2ja\_ d3m16a\_ d2yxga\_ d1ub3a\_ d3a5fa\_ d1fbaa\_ d1l6wa\_ d1xfba1  
d1wx0a1 d1vpxa1 d1mxsa\_ d2a4aa1 d1xkya1 d3cq0a1 d3s1xa\_ d1f05a\_  
d1fdja\_ d3cpa1 d4d2ja\_ d1l6ja5 d1l6ja4 d1eaka4 d1eaka3 d1l6ja3  
d1h8pa2 d1h8pa1 d3rp2a\_ g1ucy.1 d1fuja\_ d2zchp\_ d3w94a\_ d1si5h\_  
d1l06a\_ g2pka.1 d1cgha\_ d1kigh\_ d1a5ia\_ d3s9ba\_ d1hj8a\_ d1ao5a\_  
d2anya\_ d1q3xa1 d1gvza\_ d4gsoa\_ d2f91a1 d1iaua\_ d1gdna\_ d1eufa\_  
g1fiw.1 d1eq9a\_ d4nfea\_ d2rdla\_ d1spja\_ d1elva1 d1a7sa\_ d1ekbb\_  
d1pfxc\_ d1yc0a\_ d2aiqa\_ g1fiz.1 d1fi8a\_ d4k60a\_ d4dgja\_ d1mzaa\_  
d1op0a\_ d3tjva\_ d1pytd\_ d1sgfg\_ g1gg6.1 d2eeka\_ g1rtf.1 d1a0ja\_  
d3g01a\_ d1pytc\_ d4e7na\_ d1ddja\_ d1z8ga1 d2hlca\_ d1npma\_ d1brup\_  
g1jou.1 d1sgfa\_ d1autc\_ g2hnt.1 g1kdq.1 d1orfa\_ d3s69a\_ d4crga\_  
d1fxya\_ d1bqya\_ d1ra6a\_ d1muka\_ d3gsza\_ d1khva\_ d1te9a\_ d2xwha\_  
d3uqsa\_ d3hkwa\_ d3n6ma\_ d2cjqa\_ d2xyma\_ d1teba\_ d1te8a\_ d1u09a1  
d4wfxa\_ d3tyqa\_ d2pgga1 d1jx4a2 d3gv5b1 d1t94a2 d3bq0a2 d3lgia\_  
d3i77a\_ d2z9ia2 d4nsva\_ d1lcya2 d4jcna\_ d1agja\_ d1os8a\_ d1p3ca\_  
d1l1ja\_ d1qtfa\_ d1e69a\_ d1mv5a\_ d3g60a4 g1ii8.1 d1ewqa2 d1ji0a\_  
d1v43a3 d2wmfa1 d1vpla\_ d1g2912 d4a82a2 g1f2t.1 d2d62a1 d3tuic1  
d2bbsa1 d3g60a3 d2ixea\_ d1g6ha\_ d1sgwa1 d2qi9c\_ d3rlfa1 d3b60a1  
d3d31a2 d2pzea1 g1xew.1 d1jj7a\_ d1loxk2 d2onka1 d1wlwa\_ d1liwa\_  
d1qf5a\_ d1vmaa2 d1nija1 d1np6a\_ d2p67a1 d3ihla\_ d1okkd2 d1ls1a2  
d1s1ma2 d1liona\_ d2v40a\_ d3hida\_ d2vo1a1 d2g0ta1 d1vcoa2 d1j8mf2  
d1g3qa\_ d1xjca\_ d1p9ba\_ d1qzxa3 d1lihua2 d1lihua1 d2qm8a\_ d1dj2a\_  
d4ioja\_ d1cp2a\_ d1yrba2 d1hyqa\_ d3gqba2 d1skye3 d1xp8a1 d1tf7a2  
d1tf7a1 d1ye8a1 d1skyb3 d2qe7d2 d4blta\_ d4huta\_ d3l1daa2 d4hyya\_  
d2i3ba1 d1cr1a\_ d3j9tb2 d3ntua2 d1vdza1 d2z43a\_ d1e9ra\_ d1nlfa\_  
d3ziaa2 d1n0wa\_ d1g6oa\_ d3ziad2 d3j9ta2 d1pzna2 d3gqbb2 d2i49a\_  
d1nnfa\_ d1xvxa\_ d1ursa\_ d1h3da1 d1iuda\_ d4m1va1 d1twya\_ d3e13x\_  
d2nxoa1 d4pfua\_ d3ttma\_ d1elja\_ d2qmwa1 d1us5a\_ d1y3na1 d1jeta\_

d1uqwa\_ d4f19a1 d2esna2 d3thia\_ d3fasa1 d2uyeb\_ d2xwva1 d1r9la\_  
d2fyia1 d1pb7a\_ d2ozza1 d1sw5a\_ d1nh8a1 d1vr5a1 d2g29a\_ d1xs5a\_  
d3lswa\_ d2z23a\_ d3w9va\_ d3tcha\_ d1q35a\_ d1z7me1 d3q27a\_ d1p99a\_  
d1ve4a1 d2i6ea1 d4mcoa1 d4n8ya\_ d1leu8a\_ d1zbma1 d1hsla\_ d1ixca2  
d1j1na\_ d1xvya\_ d1y9ua\_ d2z22a1 d1xoca1 d4oera\_ d1wdna\_ d5f1qa1  
d1xt8a1 d1i6aa\_ d4gwoa\_ d4igta1 d1pc3a\_ d4mmpa1 d1o63a\_ d2czla1  
d2onsa2 d4mija1 d1eh3a\_ d3skpa\_ d1dtza1 d1dtza2 d1lieja\_ d1jnfa2  
d1ce2a1 d1jnfa1 d1b1xa2 d1b1xa1 d1jw1a1 d1jw1a2 d1h76a1 d1h76a2  
d1c4oa1 d2p6ra3 d2p6ra4 d1oywa2 d1oywa3 d1wrba1 d1w36b2 d1w36b1  
d1c4oa2 d3bora\_ d1t6na\_ d2eyqa5 d2eyqa3 d2eyqa2 d2zu6a2 d1veca\_  
d1uaaa1 d1w36d1 d2g9na1 d1z3ix2 d2rb4a\_ d1hv8a1 d1hv8a2 d1t5ia\_  
d1w36c2 d2j0sa2 d2j0sa1 d1fuka\_ d3hjha1 d1z5za1 d1qdea\_ d1z63a1  
d1s2ma2 d1s2ma1 d1wp9a1 d1wp9a2 d1gm5a3 d1gm5a4 d3dina4 d3dina3  
d1q0ua\_ d1w36c1 d1z3ix1 d1nkta4 d1uaaa2 d1w36d2 g1qhh.1 d2fwra2  
d2fwra1 d3q3ma\_ d1za0a1 d1mxra\_ d2inca\_ d1jk0a\_ d2incb\_ d1mhyb\_  
d3hflb\_ d1mtyb\_ d1r2fa\_ d2uw1a\_ d1mhyd\_ d3n37a\_ d1afra\_ d1syya\_  
d1mtyd\_ d2o1za\_ d1uzra\_ d1smsa\_ d2fkza\_ d1zuja1 d1s3qa1 d2fjca1  
d1z6om1 d1veia\_ d4dyya\_ d1jiga\_ d3gvya\_ d2pyba\_ d4cy9a1 d3bvfa1  
d1r03a\_ d2cf7a\_ d1nf4a\_ d1zs3a1 d4iwka\_ d3ka8a\_ d3np0x\_ d1n1qa\_  
d1lb3a\_ d4e6ka\_ d1z6oa1 d2fzfa1 d4dyua\_ d3ge4a\_ d1jgca\_ d4am4a\_  
d2z6ma\_ d1ji5a\_ d1vlga\_ d1lkoa1 d3qz3a\_ d1o9ra\_ d2ffxj\_ d1euma\_  
d1yv1a1 d2v2pa\_ d1j30a\_ d4di0a\_ d1dpsa\_ d2cbia2 d1gqia1 d2choa2  
d1oewa\_ d2qzxa\_ d2asia\_ d1psoe\_ d1miqa\_ d1smra\_ d2h6ta\_ d1pfza\_  
d1lizda\_ d3hd8a\_ d1j71a\_ d1dpja\_ d4aa9a\_ d1t6ex\_ g1b5f.1 g1lya.1  
g1htr.1 d1qdma2 d1bxoa\_ d1wkra\_ d1tzsa\_ d1libqa\_ d2qzwa\_ d1bdqa\_  
d3ggta\_ d3ixoa\_ d1mrxa\_ d2haha\_ d1tw7a\_ d4njsa\_ d1sgua\_ d2p3da\_  
d1nsoa\_ d3d3ta\_ d2rkfa\_ d1c6ya\_ d2rspa\_ d3ogpa\_ d3ekwa\_ d2o4na\_  
d2j9ja\_ d1baia\_ d3ggua\_ d3lzua\_ d4npua\_ d4j55a\_ d2r8na\_ d2fxda\_  
d2p3ca\_ d4dqea\_ d3ttpa\_ d3t3ca\_ d2p3aa\_ d2hc0a\_ d2fdda\_ d3mwsa\_  
d1um8a\_ d1ixza\_ d1qvra2 d1qvra3 d1qzma\_ d1sxjc2 d1jr3d2 d2p65a\_  
d1l8qa2 d1g8pa\_ d3hu3a3 d1sxjd2 d1njfa\_ d1in4a2 d1sxja2 d1tuea1  
d2ce7a2 d1w5sa2 d1sxjb2 d1d2na\_ d1ny5a2 d2gnoa2 d2a5yb3 d1fnna2  
d1u0ja1 d1lv7a\_ d1iqpa2 d2fnaa2 d1ixsb2 d4gita\_ d1sxje2 d1g41a\_  
d1k8rb\_ d1wgra1 d1ef5a\_ d1wfy1 d1e8ya3 d1wgya1 d1l1fda\_ d2cs4a1  
d1wxma1 d2byea1 d3kh0a1 d2byfa1 d1wxaa1 d1h4ra3 d4y18a1 d2a16a3  
d1wgda1 d1wgg1 d4q5eb\_ d1wjna1 d1se9a\_ d3n3kb\_ d1wz0a1 d1we6a1  
d2m0xa\_ d2gbka\_ d3rt3b1 d1wh3a1 d1sifa\_ d2ekec2 d4ii2b1 d4hk2a1  
d1c3ta\_ d1m94a\_ d1wgha1 d1ttna1 d1j8ca\_ d1wx8a1 d3v6cb1 d2ma9b\_  
d4i61b1 d1bt0a\_ d2jvca1 d1iyfa\_ d2k1fa\_ d1wxva1 d1wf9a1 d1t0ya\_  
d2io0b2 d1x1ma1 d2gbma\_ d1zw7a1 d2m17a\_ d1ud7a\_ d1we7a1 d2l1wpa\_  
d2gbja\_ d1wjua1 d1v6ea1 d1v86a1 d4eewa\_ d1w1aa1 d4icva\_ d4gu2a\_  
d1wx7a1 d1wy8a1 d4hjka1 d2faza1 d1v5oa1 d3ruib\_ d3waob\_ d2r2qa1  
d3m95a\_ d3wana\_ d3ubra\_ d1qo8a1 d1d4ca1 d2k3va\_ d1ft5a\_ d1qdba\_  
d1m1qa\_ d2j7aa\_ d1h21a\_ d1ogyb\_ d4fasa\_ d1oaha\_ d1sp3a\_ d2h0ba\_

d2erfa\_ d1h30a2 d1h30a1 d3mw4a1 d1pz7a\_ d2r1ba\_ d3v64a1 d1d2sa\_  
d3bopa1 d3mw3a1 d1okqa2 d1ccza2 d1vcaa1 d1dr9a2 d1ic1a1 d2d9qb1  
d2nxyb2 d1adqa1 d1fnga1 d1uvqb1 d1zs8a1 d2vola1 d2vola2 d1mfb12  
d2jelh2 d1uwel2 d3qq4b1 d1kjob\_ d1k5na1 d1osph2 d4odh12 d1ow0a1  
d1ow0a2 d1bfob2 d3l9ra2 d3jtth1 d2fath2 d4elkb2 d1fn4b2 d2xfxb\_  
d1pg7x2 d1cqka\_ d4k71b2 d1lk2a1 d1eapb2 d4lfhg2 d1i4fa1 d2nw2a2  
d1kfah2 d1mhca1 d1h3ua1 d1wejh2 d1h0db2 d1a5fh2 d1kcvh2 d1mjuh2  
d1qqda1 d1kcrh2 d1k8ia1 d3huja2 d2nnab1 d1nfd2 d3mffb2 d1s9va1  
d1lk3h2 d1q0x12 d1fv1b1 d1neza1 d4rfeb2 d1r3ha1 d1a6tb2 d1kjva1  
d1pz5b2 d1onqa1 d2bc4a2 d1de4a1 d1k8da1 d1tcra2 d1dn0b2 d1nfde2  
d2xwtb2 d1bfoa2 d1mexh2 d1iakb1 d1ypzf2 d4f7ea2 d1q72l2 d2fbjh2  
d1fe8h2 d1clzh2 d1fngb1 d1uvqa1 d1vgka1 d1c16a1 d4j12a2 d4x99b2  
d1igtb3 d1je6a1 d1q72h2 d1nldh2 d1teth2 d2hmic2 d1i1ca2 d1i1ca1  
d1k8ib1 d1q0yh2 d1kfa12 d3frua1 d1pg7w2 d1u58a1 d1igyb4 d1igyb3  
d1hyrc1 d1klub1 d1deeb2 d1c12b2 d2bc4b2 d2ig2h2 d1kcv12 d3wn5b1  
d1lk2b\_ d1lk3l2 d1mjul2 d1sm3h2 d1q0xh2 d1zvsal d1ydpal d1u8ib2  
d1ypze2 d1kcu2 d1svpa\_ d1mbma\_ d3su6a1 d1cula1 d4agka\_ d1q31a\_  
g1n11.1 d3e90b\_ d1ep5a\_ d3u1jb\_ d3ia2a\_ d1a88a\_ d4dgqa1 d1hkha\_  
d1zoia\_ d2k4ua\_ d1hp2a\_ d2lu9a\_ d1baha\_ d2meoa1 d1wm7a\_ d1h1ya\_  
d1n8ma\_ d1jlza\_ d1wpda\_ d1pvza\_ d1wt7a\_ d1rjia\_ d1lw5a\_ d1m2sa\_  
d1pjva\_ d1c49a\_ d1qkya\_ d2ktca1 d1wmta\_ d1du9a\_ d1j5ja\_ d1rlga\_  
d1t0za\_ d2i61a\_ d1t1ta\_ d1sn4a\_ d1kv0a\_ d2lkba\_ d1npia\_ d1wwna\_  
d1pe4a\_ d2kbka\_ d2li7a\_ d2kbha\_ d1dq7a\_ d1sega\_ d1omya\_ d1zywa1  
d1jzaa\_ d1bnla\_ d1dy2a\_ d2m9wa1 d3dfxa\_ d3ubub\_ d1legia\_ d1qo3c\_  
d1v7pa\_ d1tdqb\_ d3ubua\_ d1c3ab\_ d1h8ua\_ d3bx4b\_ d1t8ca1 d1sb2a1  
d1qdda\_ d2ziba1 d3cada\_ d1j34b\_ d1jwia\_ d1jzna\_ d1c3aa\_ d1oz7b\_  
d1wmza\_ d3bdwb\_ d1hq8a\_ d1fifa1 d1dv8a\_ d3hupa\_ d1wk1a1 d1umra\_  
d2afpa\_ d3bx4a\_ d1gz2a\_ d1sl6a\_ d1v7pb\_ d3g8ka\_ d1ixxa\_ d1j34a\_  
d1jwib\_ d1g1sa1 d1y17a1 d1ja3a\_ d1fvub\_ d3bdwa\_ d1sb2b1 d1fvua\_  
d1umrc\_ d1oz7a\_ d4m17a\_ d3cfwa1 d1ypqa1 d1g1ta1 d3fd4a\_ d3l9jc\_  
d4dn8a1 d1v41b\_ d1rdl1\_ d2msba\_ d3zxha\_ d1cgla\_ d1rm8a\_ d1eaka2  
d1hy7a\_ d2jsda\_ d1cxva\_ d1hv5a\_ d1i76a\_ d1rpma\_ d2shpa1 d1yfoa\_  
d1l8ka\_ d2ooqa1 d1g4us2 d1p15a\_ d1lara2 d1lara1 d1wcha\_ d2fh7a2  
d2fh7a1 d1ohea1 d2f4da\_ d1rxda\_ d2hxpa\_ d1xria\_ d1d5ra2 d1fpza\_  
d3ezza\_ d4y2ea\_ d1i9sa\_ d1iyjb4 d1iyjb5 d1iyjb3 d1o7ia\_ d4ipca1  
d1x3ea\_ d4apva\_ d1jb7a1 d1jb7a2 d1jb7a3 d3kdfa\_ d1ue1b\_ d1wjja1  
d3eiva\_ d1xjva2 d1xjva1 d2ccza2 d1se8a\_ d1l1oc\_ d1jb7b\_ d1qvca\_  
d3ulla\_ d1qzga\_ d1miua4 d1miua5 d1miua3 d3azya\_ d3wvja\_ d1upsa1  
d1ajoa\_ d2hyka\_ d1ajka\_ d2vy0a\_ d1o4ya\_ d3o5sa\_ d3d6ea\_ d3atga\_  
d1umza\_ d3i4ia\_ d1c1la\_ d4lbqa\_ d1slta\_ d4no4a\_ d3zsja\_ d3duia\_  
d1g86a\_ d1is3a\_ d1qmja\_ d1hlca\_ d1tdha3 d1q3ba3 d1ee8a3 d1k82a3  
g1len.1 d3zyra\_ d1fnya\_ d1n47a\_ g2ltn.1 d1avba\_ d3usua\_ d1dhkb\_  
d1f9ka\_ d1ukga\_ d1g8wa\_ d1g9fa\_ d1wbfa\_ d3wcsa\_ d1g7ya\_ g1loe.1  
d1mvqa\_ d1hq1a\_ d1v6ia\_ d1dbna\_ d1qnwa\_ d1fx5a\_ d4l8qa\_ d1ioaa\_

d3n35a\_ d1lepwa1 d3h33a\_ d1rwja\_ d19hca\_ d1os6a\_ d3bxua\_ d3h4na\_  
d1i77a\_ d3caoa\_ d1j0pa\_ d2ctha\_ d1duwa\_ d1ofwa\_ d2e84a\_ d1hh5a\_  
d1gyoa\_ d3h34a\_ d1dszb\_ d1a6ya\_ d3cbb\_ d1ynwa1 d1r4ia\_ d1hcqa\_  
d2hana\_ d2hanb\_ d2enva1 d1kb4b\_ d2n11b\_ d1lola\_ d1cita\_ d2dara2  
d2dara1 d1wyha2 d2dloa2 d1rutx4 d1rutx3 d2cuqa2 d1x4la2 d1x4la1  
d1x3ha2 d1x3ha1 d2d8za1 d1x61a2 d1x6aa1 d1x6aa2 d2cora2 d2cora1  
d1v6ga1 d1v6ga2 d2d8za2 d1x64a1 d1x64a2 d1b8ta1 d2co8a1 d1x63a2  
d2dj7a2 d2dj7a1 d2cu8a2 d2cu8a1 d1g47a2 d1g47a1 d1j2oa1 d1wyha1  
d2dloa1 d1wiga1 d1wiga2 d2cupa2 d2cupa3 d1x68a1 d2d8ya2 d2d8ya1  
d1x62a1 d1x68a2 d1x61a1 d1b8ta3 d1b8ta2 d2d8xa2 d2d8xa1 d1x4ka1  
d1x4ka2 d2cuqa1 d1m3va1 d2co8a2 d1j2oa2 d1x63a1 d2cura1 d2cura2  
d1x62a2 d1op9a\_ d1y0la1 d1etzb1 d1egj11 d2gsib1 d1nj9a1 d4jfhdl  
d1aqk11 d1t2ja\_ d1l04h1 d1zvya1 d3v4v11 d4enec1 d1kxtb\_ d5e8ea1  
d2pxya\_ d4weud\_ d1xiwc\_ d2esvd1 d1qgnzh\_ d1logae1 d1f4xh1 d4n1hb\_  
d3ezjb1 d3mlw11 d1kfah1 d1etza1 d1b4jh1 d3cfic\_ d4w68a\_ d2arja1  
d1ek3a\_ d2ok011 d1vera\_ d1uwgh1 d1blnb1 d1fpth1 d1lrza1 d2giya1  
d4m3kb1 d1nc2a1 d2nyyd1 d1ncna\_ d1fbi11 d5dxwa\_ d4fqqa1 d1dqdh1  
d1jfq11 d1kelh1 d1faih1 d1frgl1 d1fig11 d4m6n11 d1fo0a\_ d4hxb11  
d3b5ga\_ d3quyd1 d2h9gb1 d1i8kb\_ d2dd8h1 d2ck0h1 d1eaja\_ d4w6wb1  
d2a6ib3 d1t66d1 d2e27h\_ d1ob1b1 d1f11b1 d2v7na1 d1ad0a1 d2xt1b1  
d1pskh1 d4i13b1 d2op411 d1a0q11 d1uwel1 d1za3a1 d1ncb11 d4uu9a\_  
d1bm3h1 d1cloh1 d1nqba2 d1cf8h1 d4y5va\_ d1mhph1 d5anma1 d4cdgc1  
d4ldeb\_ d1y0lb1 d2pcpb1 d1z3g11 d1dfb11 d1fh5h1 d3g5xa1 d1tzib1  
d4dn311 d3zhka1 d2b1hh1 d2uyla1 d1f3dh1 d1nj9b1 d2agjh1 d2h1p11  
d1q72h1 d8fabbb1 d1ndmb1 d1rjca1 d4u6hb1 d3upca\_ d2fbj11 d1osph1  
d1tvda\_ d2cjev\_ d4fhbd1 d1bd2d1 d1rz7h1 d3nn8a\_ d1knoa1 d1nfdal  
d2bmkb1 d1dq11\_ d1igyb1 d1igf11 d12e8h1 d3utza1 d1nc2b1 d1rihh1  
d4mwfb1 d4jvpa1 d1mieh1 d1rhfa1 d1fgn11 d1sbsh1 d1lp9e1 d1dn0a1  
d4lqf11 d1iaih1 d1kgcd1 d1mh5b1 d1gpol1 d2g60h3 d1f8t11 d2jixd1  
d4grwh\_ d1fo0b\_ d1bfob1 d1axsa1 d1u9ka\_ d1nmbh\_ d1h8na1 d1h8na2  
d1jguh1 d4eura1 d3sdy11 d35c8h1 d1w7211 d1mvub\_ d1i9rh1 d1ob1a1  
d4wenb\_ d1yeeh1 d3ietc1 d1f58h1 d1ad0b1 d1mqk1\_ d1nbvh1 d4b50a\_  
d3r8bb\_ d1baf11 d1mamh1 d4rgne1 d2gsgb\_ d35c811 d1bafh1 d1ai1h1  
d2pcpa1 d2fath1 d2x1pa\_ d1orsb1 d1ibg11 d1shma\_ d1a2yb\_ d1u0qa\_  
d2coqa\_ d1hilb1 d1qfwi\_ d1jv5b\_ d1fn4b1 d5e0qa\_ d1nsnh1 d1plg11  
d4ocx11 d1kb5h1 d1rzfh1 d1pg7x1 d2fx7h1 d2oi9c\_ d1l7i11 d3eyva1  
d1d5i11 d4ffyl\_ d1tet11 d1a6wh\_ d1lac6a\_ d3dvfa\_ d1nfdel d1mimh1  
d1ri8a1 d1jhlh\_ d3dura\_ d1fskb1 d1f97a1 d3so3b1 d2ak4d1 d1lp9f1  
d4z7wf1 d1l7th1 d4y5ya\_ d4x7ec1 d1emth1 d1ikf11 d1nlbh1 d4utal1  
d1bjma1 d1eapb1 d1u6ah1 d2dtgd1 d1kj2b\_ d1xeda1 d1cleh1 d1fgvh\_  
d2bnub1 d2fb4h1 d2dtgb1 d1ktrh\_ d1jpth1 d1qkz11 d4hepg\_ d2atpb1  
d1flrh1 d2hrpl1 d1mvfa\_ d1iaim1 d3k80a1 d2jb5h1 d3zkxc\_ d4grwe\_  
d1it9h1 d1rhhb1 d3w9ec\_ d1e4wh1 d1sy6h1 d2j6eh1 d3qxta\_ d1jglh1  
d1p7ka1 d1tzhb1 d4n8pa1 d1gaf11 d2jelh1 d1wioa2 d4i0cc1 d1cicb1

d1lmka2 d1lmka1 d1liqwh1 d1lorqb1 d1lejoh1 d1jnlh1 d4zgia\_ d43c9b\_  
d1ggbl1 d1wejh1 d3q6fa1 d1f3dj1 d3c6la1 d1bqlh1 d3p9wb\_ d1a3r11  
d1h0db1 d2uzil\_ d1eo8l1 d1qfwl\_ d1n7ml1 d1igja1 d1c5ch1 d2a9mh\_  
d1rmfh1 d1fj1b1 d4heme\_ d1ccza1 d1a5fh1 d1logad1 d1dlfh\_ d1qa9b\_  
d1vge11 d3qskb\_ d1sjxa\_ d4ozfg1 d1sq2n\_ d1qd0a\_ d1kcvh1 d1c5db1  
d3qcul1 d8faba1 d3bn9d1 d1mjuh1 d4y8dc\_ d7fabh1 d3dvgb1 d1lo0l1  
d1a6tb1 d1gigh1 d1kcrh1 d2hwz11 d1yjdc1 d3clfl1 d4krna\_ d1dl7l\_  
d1e6o11 d1mexh1 d3r0ma\_ d4kkna\_ d1fns11 d1loaqh\_ d1rzia1 d1ucbh1  
d1ncw11 d4b41a\_ d1nfd1 d2mpah1 d2d7t11 d4grwf\_ d4b5ea\_ d1lk3h1  
d3u79a\_ d4u3xa\_ d1ghfl1 d1bvkb\_ d1mcww1 d1b88a\_ d1jrhh1 d32c2b1  
d4wemb\_ d1dsfh\_ d1op3h1 d1ce111 d1iqda1 d1qoka1 d1qoka2 d1qfuh1  
d2crya1 d1ay1h1 d1loaq1\_ d3ab0b\_ d1rur11 d1t4kb1 d1bz7b1 d1n0xh1  
d1for11 d1lucb11 d4w6yb\_ d43c9a\_ d2aabl1 d1tzia1 d4n1ca\_ d1k6qh1  
d3g9ab\_ d4tvsa1 d1ligmh\_ d1pz5b1 d3dx9a1 d3wxwh\_ d1nakh1 d1kcull1  
d3eaka\_ d4qlra1 d1cr9l1 d1d9ka\_ d1f4x11 d1deea1 d2i27n2 d1c12a1  
d2orb11 d1j8hd1 d1mcp1 d1c5da1 d1kenh1 d1bd2e1 d1h5ba\_ d4x7fc1  
d3upaa\_ d1t3fa1 d1indh1 d2dtgc1 d4hc111 d1zv5a1 d4wgvb\_ d1uwgl1  
d4f37k1 d1laqkh1 d1vesa\_ d3zkqd\_ d1fpt11 d1lo4l1 d1knob1 d3rrqa\_  
d1ct8b1 d4orz\_ d1mlbb1 d4hgkc1 d1dqd11 d1bogb1 d4ozhe1 d1dr9a1  
d1i7za1 d1dn0b1 d1kell1 d1rzib1 d1ypzf1 d1wtla\_ d1hkfa\_ d1fail1  
d1figh1 d2vyre\_ d1sjva\_ d1ohqa\_ d1bfoa1 d1pkqb1 d1mjul1 d1b4j11  
d1nsn11 d2arjb1 d1p4bh\_ d4aj0a\_ d3nn8b\_ d2rcja1 d1f2xk\_ d4v1dd\_  
d1ladqh1 d2eksa\_ d4k3ga\_ d1jfqh1 d1uweh1 d1frgh1 d4gftb\_ d1uz8b1  
d4n1ea\_ d1bm3l1 d1clo11 d3mcka1 d2vq1a1 d1ae6h1 d4aq1b1 d1uj3b1  
d1nbqa1 d1fh5l1 d2ck0l1 d2ywza\_ d1q72l1 d4nxbx\_ d1hila1 d4hz1b1  
d2j88l1 d1zmya1 d1cd0a\_ d1a4ka1 d1psk11 d1a0qh1 d4krmb\_ d1ncbh1  
d2fbjh1 d1j8he1 d1i3ua\_ d1cf8l1 d1fe8h1 d2p1ya1 d1eeqa\_ d2x89a\_  
d1o10a\_ d2r0lh1 d1ub5a1 d1dfbh1 d3eyvb1 d4jdvb1 d4p2cg\_ d2gsia1  
d2agj11 d1u3ha1 d2h1ph1 d1rih11 d1fskc1 d1boga1 d2a77l1 d1osp11  
d1qfoa\_ d3dwta\_ d2fx7l1 d1rz7l1 d3stba1 d1pkqa1 d1b6da1 d1dzba2  
d1dzba1 d1kj2a\_ d4l1ha\_ d1rzgb1 d1dqlh\_ d12e8l1 d1miel1 d1jmaa\_  
d1sbs11 d1fgnh1 d1f58l1 d1mqkh\_ d1ndgb1 d3qegl1 d1iail1 d2aw2a1  
d1tqbc1 d3fo2a1 d4dkaa\_ d1f8th1 d2g60l1 d2ywya\_ d1uj3a1 d1yc7a\_  
d3bd3a\_ d4w6xb1 d1nmb1\_ d1i8ka\_ d1rjlb1 d1ypze1 d1p7kb1 d1kxqe\_  
d1gpoh1 d2z4qa1 d1w72h1 d1i9rl1 d4qgya1 d4xt1c\_ d2qqnh1 d1cical  
d3c08h1 d2cd0a\_ d2bdnh1 d1hnga1 d1mam11 d1nldh1 d1cr9h1 d4lcih1  
d3bkyh1 d3qg7l1 d1ai111 d1kxvc\_ d4iosd\_ d1l7ih1 d2x1qa\_ d1ub6b1  
d3k74b\_ d1libgh1 d1teth1 d1igya1 d1hxma1 d2x6ma\_ d2e7la\_ d5e03a\_  
d1qfwm\_ d2r0kh1 d1igjb1 d1rurh1 d1plgh1 d1mj8h1 d1yuhb1 d3fmg11  
d1rzzfl1 d1emtl1 d1ad9b1 d1igtb1 d1nlb11 d1d5ih1 d3k7ua\_ d4ffyh\_  
d1bwwa\_ d3dvga1 d1a6ta1 d1fgvl\_ d4qxgl1 d1mim11 d1jh11\_ d2hffb1  
d2hh0l1 d1qkzh1 d1l7t11 d1afvh1 d1iaii1 d2cjuh\_ d1um5h1 d2ghwb2  
d2ghwb1 d1kgce1 d2fgwh1 d1likfh1 d1dvfd\_ d2i24n1 d2xtjb\_ d1za3b1  
d2yc1a\_ d2hh0h1 d2x1oa\_ d1bvka\_ d1rjla1 d5e7ba1 d1igta1 d1il1b1

d2fb4l1 d1mvua\_ d1jptl1 d32c2a1 d1fvca\_ d1iqdb1 d2hrph1 d2p4ab\_  
d4qola\_ d1p2cb1 d1wt5c\_ d1t4ka1 d5c1mb\_ d1it9l1 d1bz7a1 d1b2wh1  
d1e4wl1 d1jnl11 d1yedb1 d1za6b1 d3u7aa\_ d1igfh1 d3gnml1 d1orsa1  
d1wej11 d1a2ya\_ d1hxmb1 d1gafh1 d2j4wh1 d1pz5a1 d1j05a\_ d1a3rh1  
d4fqll1 d1qfwh\_ d1eo8h1 d1n7mh1 d4s11a\_ d1kegh1 d5da4a\_ d1iqwl1  
d3whxb1 d1vgeh1 d1deeb1 d1c12b1 d1t2ql1 d1ad9a1 d3gsnb1 d3b2uc1  
d1ggbh1 d1t3fb1 d1nakl1 d4ocmc\_ d1lila1 d2v7hb3 d2esve1 d1mcoh1  
d2qr0b1 d2q3aa\_ d1ct8a1 d1kcr11 d2pxyb\_ d2uzih\_ d5c3ld\_ d3durb\_  
d1c5c11 d2ak4e1 d1d17h\_ d1xiwd\_ d1mlba1 d1rmfl1 d1i7zb1 d1d1fl\_  
d2xa3a\_ d5bq7b1 d1dqqb1 d3h42l1 d1legjh1 d1kcv11 d1fe8l1 d2j6e11  
d1f3rb2 d1l1k3l1 d1sm3h1 d1q0xh1 d1ghfh1 d7fabl1 d1igch1 d1lo0h1  
d4idla\_ d5c2bl\_ d1jrh11 d1lila1 d3zhda1 d4kfzc\_ d1b0wa\_ d1e6oh1  
d1mex11 d4krpb\_ d1fnsh1 d1ncwh1 d4hgma\_ d4eigb1 d4rzca\_ d2mpa11  
d4y5xa\_ d5en2b1 d3lrga1 d4ej1c1 d1rhha1 d1j05b\_ d1forh1 d1q9wb1  
d2wzpd\_ d2aq2a1 d1h0da1 d3revb1 d2ij0c1 d1tzha1 d4m7j11 d1k6q11  
d3b9kc1 d1igml\_ d3qea1 d1dsfl\_ d1ce1h1 d1kcu11 d1zvha1 d1zvoa1  
d1tqbb1 d1ay1l1 d2qsc11 d2cgrh1 d1n10h1 d1ken11 d3eo0a1 d4n9ob1  
d1n0xl1 d3k1kc\_ d2aq2b1 d1ck1a1 d1enfa1 d1i4pa1 d1vloa1 d1et9a1  
d1esfa1 d2g9hd1 d4ohja1 d1klud1 d1bxta1 d1eu3a1 d1ty0a1 d1fnua1  
d2qa1n1 d2cqva1 d1fhga\_ d2k1ma\_ d2d12a1 d1biha3 d1biha1 d1biha4  
d3qp3a1 d1g1ca\_ d1gxea\_ d1cvsc2 d1cvsc1 d1xmwa2 d1m4ka2 d2otpa2  
d1biha2 d1rhfa2 d2fcba2 d2fcba1 d1gsma2 d1lepfa1 d1lepfa2 d2dava1  
d1waaa\_ d1f97a2 d1x44a1 d1vcaa2 d1fnla2 d1fnla1 d3b5ha2 d3h8na2  
d3h8na1 d1jbj1a1 d1jbj2a1 d1pd6a\_ d1f2qa2 d1f2qa1 d3cx2a\_ d1nbqa2  
d3b5ha1 d1n26a1 d1xiwb\_ d1xaua\_ d1fltx\_ d2ifga1 d1olla1 d1olla2  
d1cs6a4 d1cs6a3 d1cs6a2 d1cs6a1 d2gw5a2 d1sy6a1 d1xiwa\_ d1lucta2  
d1lucta1 d1ry7b2 d1gl4b\_ d1qz1a3 d1olza1 d2c9aa1 d1wwca\_

**Family-75 (c.56.5.4)**

**Positive dataset contains 8 protein sequences.**

d1yloa2 d1y7ea2 d1y0ya3 d1ysja1 d1z2la1 d2fvga2 d2grea2 d1xmba1

**Negative dataset contains 4066 protein sequences.**

d1m32a\_ d1libja\_ d1c7na\_ d1iuga\_ d4q75a\_ d2bkwa1 d1t3ia\_ d1n8pa\_  
d1qz9a\_ d1jff9a\_ d1leg5a\_ d1p3wa\_ d3kgwa\_ d1cl1a\_ d2ctza1 d1vjoa\_  
d2rfva\_ d1gc0a\_ d1cs1a\_ d1d2fa\_ d2ch1a1 d1qgna\_ d1pffa\_ d1elua\_  
d1ax4a\_ d2v1pa1 d2ez1a\_ d1u08a\_ d1lc5a\_ d1b5pa\_ d2ay1a\_ d1bw0a\_  
d3pd6a\_ d7aata\_ d2csta\_ d1j32a\_ d1fg7a\_ d4wlha\_ d1o4sa\_ d1v2da\_  
d1gdea\_ d1m6sa\_ d1v72a1 d1svva\_ d1ajsa\_ d1wsta1 d2f8ja2 d1lk9a\_  
d1vp4a1 d1xi9a1 d2gb3a1 d1js3a\_ d3rcha\_ d3k40a\_ d1xkta1 d2hfka\_  
d5d3ka\_ d2cfba1 d1dfoa\_ d1o69a\_ d1bj4a\_ d3k28a\_ d2bwpa\_ d3lg0a\_  
d2fnua\_ d3ou5a\_ d1z7da1 d1b9ha\_ d1iaya\_ d4msoa\_ d1bs0a\_ d1s0aa\_  
d1sffa\_ d3tqxa\_ d1mdoa\_ d3qboa\_ d3pgya\_ d1bjna\_ d2dkja\_ d1ejia\_  
d1vefa1 d4wxga\_ d3bs8a\_ d3gbxa1 d1w23a\_ d1h6ta2 d1h6ua2 d2tbvc\_  
d1x36a\_ d1smvc\_ d1ng0c\_ d4sbvc\_ d1opoa\_ d1f2nc\_ d1t61c1 d3lgia\_  
d3i77a\_ d2z9ia2 d4nsva\_ d1lcya2 d4jcna\_ d1os8a\_ d1hpga\_ d1p3ca\_

d1l1ja\_ d1qtfa\_ d1fwxa1 d1libya\_ d1f56a\_ d1bypa\_ dlazca\_ d1ws8a\_  
d3u25a\_ d1cuoa\_ d1lid2a\_ d1rkra\_ d2iaac\_ d4dplx\_ d1nwpa\_ d2gima\_  
d2i7sa\_ d1qhqa\_ d3ehbb1 d1fftb1 d1gyca3 d1hfua2 d1kbva1 d1kbva2  
d1sdda1 d1sdda2 d1gyca1 d1gyca2 d1mzya1 d2bw4a1 d1aoza1 d1aoza3  
d1aoza2 d1kyaa2 d1kyaa3 d1kyaa1 d1mzya2 d4e9sa1 d1sddb1 d1sddb2  
d1hfua1 d1hfua3 d1oe1a2 d1oe1a1 d1v10a2 d1v10a3 d1v10a1 g1f8v.1  
d1novc\_ d2bbvc\_ d1iknc\_ d3brda1 d1p7h11 d1oy3c\_ d1imhc1 d1gjia1  
d1zk9a1 d2cxka1 d2bema\_ d1ea9c1 d1qhoa1 d2fhfa2 d2fhfa1 d1k3ia1  
d1j0ha1 d1cxl1a1 d2bhua1 d1edqa1 d1f1sa2 d1ut9a2 d1gvia1 d1txka1  
d1adqa1 d1fnga1 d1uvqb1 d1zs8a1 d2vola1 d2vola2 d1mfb12 d2jelh2  
d1uwel2 d3qq4b1 d1kjob\_ d1k5na1 d1osph2 d4odh12 d1low0a1 d1low0a2  
d1bfob2 d3l9ra2 d3jtth1 d2fath2 d4elkb2 d1fn4b2 d2xfxb\_ d1pg7x2  
d1cqka\_ d4k71b2 d1lk2a1 d1eapb2 d4lfhg2 d1i4fa1 d2nw2a2 d1kfah2  
d1mhca1 d1h3ua1 d1wejh2 d1h0db2 d1a5fh2 d1kcvh2 d1mjuh2 d1qqda1  
d1kcrh2 d1k8ia1 d3huja2 d2nnab1 d1nfd2 d3mffb2 d1s9va1 d1lk3h2  
d1q0xl2 d1fv1b1 d1neza1 d4rfeb2 d1r3ha1 d1a6tb2 d1kjva1 d1pz5b2  
d1onqa1 d2bc4a2 d1de4a1 d1k8da1 d1tcra2 d1dn0b2 d1nfd2 d2xwtb2  
d1bfoa2 d1mexh2 d1iakb1 d1ypzf2 d4f7ea2 d1q7212 d2fbjh2 d1fe8h2  
d1clzh2 d1fngb1 d1uvqa1 d1vgka1 d1c16a1 d4j12a2 d4x99b2 d1igtb3  
d1je6a1 d1q72h2 d1nldh2 d1teth2 d2hmic2 d1i1ca2 d1i1ca1 d1k8ib1  
d1q0yh2 d1kfa12 d3frua1 d1pg7w2 d1u58a1 d1igyb4 d1igyb3 d1hyrc1  
d1klub1 d1deeb2 d1c12b2 d2bc4b2 d2ig2h2 d1kcv12 d3wn5b1 d1lk2b\_  
d1lk3l2 d1mjul2 d1sm3h2 d1q0xh2 d1zvs1 d1ydp1 d1u8ib2 d1ypze2  
d1kcu2 d4alac\_ d1pjwa\_ d1rera1 d1s6na\_ d3uzqb\_ d1ep0a\_ d2pa7a1  
d1wlt1 d1nxma\_ d2c0za1 d1ktja\_ d1ds6b\_ d1fstb\_ d2bjca1 d2hsga1  
d1qpza1 d1efaa1 d1k9ua\_ d2opoa\_ d1r0ka3 d1j5pa3 d1vkoa2 d1vm6a2  
d3qvs1 d1gr0a2 d1p1ja2 d2ovga\_ d1sq8a\_ d1rzsa\_ d3kz3a\_ d3orca\_  
d3gpdg2 d2q49a2 d1hdgo2 d2g17a2 d2cvoa2 d2czca1 d3pwka2 d1obfo2  
d1i32a2 d1zyao2 d2pkqo2 d1b7go2 d2hjsa2 d1cf2o2 d1vkna2 d2msya\_  
d2djoa1 d2r5za\_ d1au7a1 d1f43a\_ d2lmda1 d1akhb\_ d1s7ea1 d3nara\_  
d1zq3p1 d2craa1 d1mija\_ d4uuta\_ d3a01a\_ d1x58a1 d3rkqa1 d3cmya1  
d2cqxa1 d2da6a1 d1e3oc1 d1fjla\_ d1mh3a1 d1x41a1 d1wh7a1 d1gt0c1  
d2mw8a\_ d1lfup\_ d1x2ma1 d1b72a\_ d1wi3a1 d1jgga\_ d1wjha1 d1x2na1  
d1mnm\_ d2cuea1 d3k2aa\_ d2hosa\_ d2jwta2 d1pufa\_ d1octc1 d2hi3a\_  
d1b8ia\_ d4j19a\_ d3lnqa\_ d1wh5a1 d1b8ib\_ d1hcra\_ d1tc3c\_ d1gdta1  
d1u78a2 d6paxa1 d1k78a1 d1k78a2 d1hlva2 d1iufa2 d1iufa1 d1ligna2  
d2iu5a1 d1zk8a1 d2g7sa1 d2fd5a1 d2np5a1 d1z0xa1 d2id6a1 d2d6ya1  
d2i10a1 d1vi0a1 d2oi8a1 d3c07a1 d2ns7a1 d2fq4a1 d2yvea1 d1t33a1  
d2o7ta1 d1rkta1 d2np3b1 d2g7ga1 d2gena1 d2fbqa1 d2g7la1 d2gfna1  
d2g3ba1 d2jj7a1 d2hyja1 d1sgma1 d1ui5a1 d2hkua1 d2id3a1 d4jyka1  
d3lv8a\_ d1s3ga1 d1zaka1 d1s4qa\_ d3tvta2 d1uf9a\_ d1khta\_ d1ckea\_  
d1osna\_ d1p5zb\_ d4tmka\_ d3cm0a\_ d1tmka\_ d1jaga\_ d3h86a\_ d1t0hb\_  
d1nn5a\_ d2h92a\_ d3kb2a1 d2c95a1 d1yj5a2 d1kgda\_ d1ly1a\_ d2ak3a1  
d1vyva2 d1deka\_ d2grja1 d1p3ja1 d1y63a\_ d1e4ya1 d1s96a\_ d3iija1



d1lvga\_ d1nkasa\_ d1vyua2 d4e22a\_ d1qf9a\_ d1jjva\_ d1q3ta\_ d1ki9a\_  
d1lw7a2 d1teva\_ d1kjwa2 d1gsia\_ d2iyva2 d1kaga\_ d1viaa\_ d1e6ca\_  
d1m7ga\_ d1x6va3 d1odfa\_ d1uj2a\_ d4gi7a\_ d2jeoa1 d1z0ja1 d3umra2  
d3gj0a1 d2gaoa1 d1yzga1 d1x3sa1 d1g7sa4 d1puja\_ d1udxa2 d1kk1a3  
d2o52a\_ d1jwyb\_ d1zcaa2 d1zcba2 d2fv8a1 d2cjwa\_ d3dz8a1 d1xzpa2  
d1vg8a\_ d4qxaa\_ d2ew1a1 d1x1ra1 d2bcgy\_ d3doea1 d3con\_ d3rega\_  
d3wyga\_ d1upta\_ d2b6ha1 d1zd9a1 d1lnza2 d1r5ba3 d1n0ua2 d1r2qa\_  
d2f91a1 d2rhda\_ d3q3jb\_ d3q85a\_ d1efma1 d1r8qa\_ d2gf9a1 d2akab1  
d1ek0a\_ d1z08a1 d2gcoa1 d2dy1a2 d4g01b\_ d2cxxa1 d1svia\_ d3q72a\_  
d1ni3a1 d4ac9a4 d2erxa1 d2bmea\_ d1wxqa1 d2gf0a1 d4ldja1 d1zunb3  
d1d5ca\_ d4lv5b\_ d1efca3 d1kmqa\_ d2g6ba1 d3lrpa\_ d1tada2 d2y8ea\_  
d4rd4a1 d1z06a1 d2heia\_ d3a58b\_ d1u01a2 d1d2ea3 d1zj6a1 d2ocba\_  
d3rwoa\_ d1mr3f\_ d2e9sa1 d4u5xa1 d2iwra\_ d2fn4a1 d3bwdd\_ d2nzja1  
d2atva1 d2ksqa\_ d3l43a\_ d1mkya2 d1mkya1 d1wmsa\_ d1jnya3 d2rmka\_  
d1f6ba\_ d1f60a3 d1gota2 d1jala1 d2fh5b1 d1g16a\_ d2wblc\_ d1m7ba\_  
d1wf3a1 d1f5na2 d1t9ha2 d1z6xa1 d1z0aa1 d2fg5a1 d2a5ja1 d2bcjq2  
d1s0ua3 d1ky3a\_ d4y0va\_ d4lhwa\_ d2qmea1 d2atxa1 dlegaa1 d1ryha\_  
d1moza\_ d1nrjb\_ d2erya1 d3bfka\_ d1puia\_ d1fzqa\_ d3j3az1 d3t5ga\_  
d1shza2 d3defa\_ d2f7sa1 d3raba\_ d3tsoa\_ d3aq4a\_ d2a17a1 d3sfva1  
d3bc1a\_ d2ncda\_ d1sdma\_ d3h4sa1 d2heha\_ d2grya\_ g3kin.1 d1kk8a2  
d1br2a2 d1f9va\_ d2mysa2 d1lkxa\_ d3t0qa\_ d4db1a1 d3gbja\_ d1ry6a\_  
d1v8ka\_ d1s5ja2 d1qhta2 d4dlea2 d1tgoa2 d3py8a2 d1q8ia2 d1kfsa2  
d2py5a2 d1d5aa2 d1k8ka2 d1k8ka1 d3uleb1 d3i33a2 d3i33a1 d1bupa1  
d1dkgd2 d1dkgd1 d4ci6a2 d1jcf1a1 d4a2ba2 d2fxua1 d1yaga2 d4cbua2  
d1bupa2 d3vrda1 d3vrda2 d1fcdc2 d1fcdc1 d1h1oa1 d1m70a2 d1m70a1  
d1iqca2 d1iqca1 d1eb7a1 d1nmla2 d1nmla1 d1nira1 d1qksa1 d3h1jd1  
d1hroa\_ d4gedb\_ d3zooa\_ d1mz4a\_ d1gu2a\_ d1f1fa\_ d1dvva\_ d1c6ra\_  
d1c75a\_ d1e29a\_ d1gdva\_ d1cnoa\_ d1h32b\_ d1co6a\_ d2bh4x\_ d2aiua\_  
d5cytr\_ d1jdl1a\_ d1i8oa\_ d2zboa\_ d3dmia\_ d1ls9a\_ d1wvec\_ d2yk3a\_  
d3ph2b\_ d1dw0a\_ d5aura\_ d1q13a\_ d1qn2a\_ d1f1ca\_ d4zzva\_ d2xspa\_  
d1leg1a\_ d4v20a\_ d1ojja\_ d4ipma1 d4csia\_ d3pfza\_ d3ovwa\_ d2yoka\_  
d2nqya\_ d1h4ga\_ d1hixa\_ d1oa2a\_ d1olra\_ d3b7ma\_ d4h7ma1 d3wp3a\_  
d2vgda\_ d1ligoa\_ d3zsea\_ d2nlra\_ d3wx5a\_ d1oa3a\_ d1pvxa\_ d1m4wa\_  
d1f5ja\_ d1oa4a\_ d4ix1a1 d3sita1 d1h32a2 d1evsa\_ d1cnt1\_ d1pvhb\_  
d1z7ca\_ d1huwa\_ d1bgea\_ d1rhga\_ d1f6fa\_ d1f45b\_ d1i1rb\_ d1axia\_  
d1letea\_ d3tgxb\_ d1scfa\_ d2z3qa1 d3qb1a\_ d1hula\_ d1m48a\_ d4nkqb\_  
d1v7mv\_ d5e4ea\_ d2o27a\_ d3b5ka\_ d2psma1 d4zf7a\_ d3uf5a\_ d4x51a\_  
d4ypgc1 d3oq3a\_ d1lqsl\_ d1n1fa\_ d1aula\_ d1wu3i\_ d3bes1\_ d3ux9a\_  
d4dnxa2 d1m8pa2 d1v47a2 d1g8fa2 d1x6va2 d2el7a\_ d1iq0a2 d1irxa2  
d1r6ta2 d1ivsa4 d2cyba\_ d1rqga2 d1j09a2 d2yxna\_ d1f7ua2 d1h3fa1  
d1ffya3 d2g36a1 d1jila\_ d1n31a\_ d1i61a\_ d1pfva2 d1h3na3 d3n9ia\_  
d3sz3a1 d3sw2a\_ d1moxc\_ d1dx5i3 d1edmb\_ d1aut12 d1aut11 d1dva11  
d1szba2 d1kigl\_ d2y5f1\_ d1ijqa2 d1gk5a\_ d1g1sa2 d1nt0a3 d1xdtr\_  
d1lmja2 d1lmja1 d1nzia2 d2wphe\_ d1klil\_ d1pfx12 d1pfx11 d1p9ja\_

d1g1ta2 d1f7ea\_ d4yzub\_ d1lr7a1 d2mgpa1 d1b9wa1 d2mgpa2 d1oblcl  
d1oblcl2 d1nlia2 d1nlia1 d2npra2 d2npra1 d1qx2a\_ d2y5ia\_ d1qlsa\_  
d1psra\_ d3n22a\_ d2egda\_ d4ggfc\_ d2wcea\_ d2luca\_ d4aqia\_ d3nsia\_  
d2lp3a\_ d1j55a\_ d1a4pa\_ d1k8ua\_ d1nsha\_ d1pvaa\_ d3fs7a\_ d2pvba\_  
d1ttxa\_ d1rwy\_ d2kyfa\_ d1rk9a\_ d1a75a\_ d1exra\_ d1tiza1 d1nyaa\_  
d1g8ia\_ d1ggwa\_ d1wdcc\_ d3fwba\_ d1ggza\_ d2o5ga\_ d1ctaa\_ d1m45a\_  
d3i5gc\_ d1sl8a\_ d1fpwa\_ d2scpa\_ d2roaa\_ d4agra\_ d3pn7b\_ d1br1b\_  
d2mysb\_ d1s6ca\_ d1bjfa\_ d2obha\_ d1jfk\_ d1jfoa\_ d1qv0a\_ d1lkja\_  
d2mlfc\_ d2m97a\_ d2d8na\_ d4by5a\_ d1jbaa\_ d4nqga\_ d1wdcb\_ d2mysc\_  
d1j7qa\_ d1s6ia\_ d1uhka2 d1r2ua\_ d1dtla\_ d3kf9a\_ d3pn7c\_ d1qjta\_  
d1fi6a\_ d1c07a\_ d5d67d\_ d1tuza\_ d1h8ba\_ d1eg3a1 d1eg3a2 d2zkmx1  
d1snla\_ d1gjya\_ d1y1xa\_ d1hqva\_ d1dvia\_ d1df0a1 d4usla\_ d1k94a\_  
d1wkya2 d1uuqa\_ d3wh9a\_ d4m1ra\_ d4xuya\_ d2je8a5 d4bf7a1 d3cuia\_  
d1ur4a\_ d1qw9a2 d1odza\_ d2vzsa5 d1bqca\_ d2x2ya1 d1hjqa\_ d1qnra\_  
d4y7ea1 d1vjza\_ d4k68a\_ d2v3ga\_ d4hpga\_ d1nofa2 d1nq6a\_ d1h4pa\_  
d1aq0a\_ d3ziza\_ d4bs0a\_ d1ecea\_ d1h1na\_ d1ta3b\_ d1w91a2 d1l1wa\_  
d1uhva2 d1us3a2 d1legza\_ d7a3ha\_ d1tvna1 d3nyda1 d1ghsa\_ d2cyga1  
d4xv0a\_ d2c8na2 d1w32a\_ d3emca\_ d1v6ya1 d1foba\_ d2uwfa1 d2fgla\_  
d3niya1 d2c0ha1 d1rh9a1 d1yq2a5 d1szna2 d1fa2a\_ d1pama4 d5do8a1  
d1ea9c3 d1hx0a2 d2fhfa5 d1qhoa4 d1avaa2 d1m53a2 d4m8ua1 d2gjpa2  
d1lwha2 d4howa1 d1ktba2 d1j0ha3 d3vm5a1 d2x1ia\_ d1wzaa2 d1uasa2  
d2diea1 d1mxga2 d1ht6a2 d1eswa\_ d1iv8a2 d5cpsa\_ d1ud2a2 d1zjaa1  
d3gbea1 d1kwga2 d1wdpa\_ d1gcya2 d1g5aa2 d1hvxa2 d3dhpa2 d2bhua3  
d4do4a1 d3qgva1 d1e43a2 d1g94a2 d2d3na2 d1gjwa2 d1gvia3 d1x1na1  
d1r7aa2 d1tz7a1 g1apy.1 d3ljqa\_ d4c7ga2 d2gjxa1 d1jaka1 d1yhta1  
d4toqa\_ d1wb0a1 d1w9pa1 d1eoka\_ d1itxa1 d1kfwa1 d1goia2 d1ledqa2  
d2gsja\_ d1hjxa1 d1vf8a1 d3wdpp1 d3wq5a\_ d1gnxa\_ d4gxpa\_ d4hz8a\_  
d1e4mm\_ d3aiua\_ d1wcga1 d1qvba\_ d3ahxa\_ d1v02a\_ d2dgaa\_ d1pbga\_  
d1vffa1 d1qoxa\_ d4ha4a\_ d1mixa2 d1e5wa2 d1isna2 d2a16b2 d3syxa1  
d1mkea1 d2p8va\_ d1xoda1 d1evha\_ d1qc6a\_ d1legxa\_ d2y8ga\_ d1xkea1  
d2y8fa\_ d1liuka\_ d2csua1 d3q9ub\_ d2yv1a1 d3q9na\_ d2d59a\_ d2yv2a1  
d1euca1 d1y81a1 d3nvva1 d1krha3 d2h88b1 d1n62a2 d1t3qa2 d1kf6b2  
d1zoyb1 d1jq4a\_ d1ffva2 d1dgja2 d1rm6c2 d1h6ta1 d9ldta1 d2ewda3  
d1up7a1 d2dfda1 d1s6ya1 d1vjta1 d7mdha1 d1hyea1 d1t2da1 d1ojsa3  
d1b8pa1 d1ldna1 d1hyha1 d1civa1 d2a92a1 d1ez4a1 d1i0za1 d1y6ja1  
d1gv0a1 d1ur5a1 d1ll1da1 d1lobba1 d1v8ba1 d1gdha1 d1l17da1 d2dl1da1  
d1mx3a1 d1ygya1 d1li4a1 d1j4aa1 d2naca1 d1npya1 d3t4ea2 d1a4ia1  
d1o0sa1 d2hk9a2 d2egga2 d1b26a1 d1bvua1 d1gq2a1 d1c1da1 d1leha1  
d1gtma1 d1euza1 d1nvtal d3dona2 d1gpja2 d1vi2a1 d1p77a1 d1nyta1  
d1b0aa1 d1vl6a1 d1v9la1 d1txga2 d3f47a1 d1mv8a2 d2pv7a2 d1xc2a3  
d2ahra2 d4xiya1 d2f1ka2 d1pgja2 d1i36a2 d1np3a2 d1l1j8a4 d1teaa3  
d1qmga2 d2i76a2 d2g5ca2 d1wdka3 d1dlja2 d3cuma3 d1kola2 d1f8fa2  
d1qora2 d1jqba2 d1vj0a2 d1cdoa2 d1gu7a2 d1d1ta2 d1xa0a2 d2dm6a2  
d1jvba2 d1rjwa2 d1llua2 d1h2ba2 d1tt7a2 d1piwa2 d1o89a2 d1liz0a2

d1e3ja2 d1yb5a2 d1uufa2 d1e3ia2 d3gpdg1 d1vc2a1 d2nvwa1 d1u8fo1  
d1ydwa1 d1hdgo1 d2g17a1 d1cf2o1 d2czca2 d1r0ka2 d1obfo1 d2cvoa1  
d1ebfa1 d1h6da1 d1i32a1 d1zh8a1 d2q49a1 d1qkia1 d1j5pa4 d3pzra1  
d1xeaa1 d1vkoa1 d1vm6a3 d3qvsa1 d2pkqo1 d1b7go1 d1gr0a1 d1p1ja1  
d1lc0a1 d1j0xo1 d3pwka1 d2hjsa1 d1zyao1 d1vkna1 d1t1ta1 d1nvmb1  
d3sjua\_ d3ojfa1 d1xu9a1 d2jjya1 d1n7ha\_ d1y1pa1 d1h5qa\_ d1jtva\_  
d4fs3a\_ d2bkaa1 d1gy8a\_ d2c5aa1 d1ulsa\_ d1ooea\_ d2b69a1 d1y5ma1  
d1spxa\_ d1aela\_ d1bxka\_ d1ydea1 d1gega\_ d1hdoa\_ d1o5ia\_ d1e6ua\_  
d1snya1 d2rhca\_ d3zv4a\_ d5ceja\_ d2d1ya1 d1fjha\_ d3w8ea\_ d2fmua1  
d1x1ta\_ d1rpna\_ d3ay7a1 d1k2wa\_ d1eq2a\_ d2hrba1 d3ruaa\_ d2ew8a1  
d4hwka\_ d1xgka\_ d2bd0a1 d1yo6a1 d2a35a1 d2ntva\_ d1vl8a\_ d1hdca\_  
d4bkua\_ d2ag5a1 d2q45a\_ d1nffa\_ d4iy1a\_ d1zbqa1 d1ek6a\_ d1ja9a\_  
d2q46a2 d1iy8a\_ d1cyda\_ d2ptga\_ d1hxha\_ d1uzma1 d3lyla\_ d4m89a\_  
d3wyea\_ d2b1la1 d1w6ua\_ d1sb8a\_ d2q2va\_ d4nr0a\_ d1e6wa\_ d2gasa\_  
d3oiga1 d2bgka1 d1mxha\_ d1vl0a1 d1rkxa\_ d1r6da\_ d1wmaa1 d1e7wa\_  
d2c07a1 d1xkqa\_ d3tzha\_ d1g0oa\_ d3lz6a\_ d1qyca\_ d1ledoa\_ d1gz6a\_  
d1oc2a\_ d1t2aa\_ d1zema1 d2xoxa\_ d1z45a2 d1geea\_ d1p33a\_ d3lt0a\_  
d4e6pa\_ d2wyua\_ d1db3a\_ d4q9na\_ d1xhla\_ d4o1ma\_ d1fmca\_ d2uvda\_  
d2gdza1 d1uaya\_ d2z1ma\_ d2o23a2 d2fr1a2 d2fr1a1 d1qsga\_ d1qyda\_  
d4zjua\_ d2a4ka1 d1yb1a\_ d1wvga1 d1yxma1 d3f4ba\_ d1mg5a\_ d1xg5a1  
d1r55a1 d3gboa\_ d1atla\_ d1kufa\_ d1buda\_ d4q1la\_ d1quaa\_ d1yp1a\_  
d1wnia\_ d2gfoa1 d1vjva\_ d2ayna1 d3nhea\_ d4ekfa\_ d2ckga\_ d1th0a\_  
d2bkra\_ d1g0da4 d2f4ma1 d1x3za\_ d3u1ra1 d1g9ka2 d1kapp2 d1k7ia2  
d1t3ca\_ d1epwa3 d2a97a\_ d3fiea\_ g1e1h.1 d3ioqa\_ d1fh0a\_ d1o0ea\_  
d1khqa\_ d1m6da\_ d2cb5a\_ d1cs8a\_ g8pch.1 d1s4va\_ d2pnsa\_ d1vsna1  
d1mira\_ d1liwda\_ d2oula\_ d7pcka\_ d3bwka\_ d3bcna\_ d2p86a\_ d1pvja\_  
d1pcia\_ d1gece\_ d1deua\_ d4bs6a\_ d1xkga1 d1cqda\_ d1jqpa2 d2c0ya\_  
d2bdza\_ d3p5ua\_ d1ex4a2 d1c6va\_ d2jk6a2 d2jk6a1 d1fecal d1fecal  
d1lpfa1 d1lpfa2 d1xhca1 d1xhca2 d1dxla2 d1dxla1 d1gera2 d1m6ia2  
d1onfa1 d3lada2 d3lada1 d1w4xa1 d1w4xa2 d1gesa2 d1mo9a1 d1xdia1  
d1f12a2 d1f12a1 d1fcda1 d1fcda2 d1h6va2 d1h6va1 d1mo9a2 d1gv4a2  
d1gv4a1 d2gv8a2 d2gv8a1 d1aoga1 d1aoga2 d1hyua1 d1ebda1 d1ebda2  
d3dk9a1 d1q1ra2 d1q1ra1 d1gesa1 d1zbfal d2z1ha\_ d2etja1 d3qioa1  
d1j11a\_ d2e41a\_ d1j12a\_ d2l1sna1 d1io2a\_ d1uaxa\_ d2yv0x\_ d1mu2a1  
d1ekea\_ d1i39a\_ d1pn0a1 d1reoa1 d1ju2a1 d2f5va1 d3c96a1 d2gmha1  
d1pj5a2 d1gpea1 d1n4wa1 d1k0ia1 d2dw4a2 d2ivda1 d1seza1 d2voua1  
d1kdga1 d1s5ja1 d2hbja2 d2igia\_ d1wlja\_ d1qhta1 d4dlea1 d1tgoa1  
d2f96a1 d3tr8a1 d3mxma\_ d1q8ia1 d1y97a1 d1w0ha\_ d1kfsa1 d2py5a1  
d1noya\_ d1d5aa1 d1yt3a3 d2guia\_ d3mwpal d4kbl1a\_ d1id1a\_ d2hmta\_  
d1b9ra\_ d1offa\_ d1frra\_ d3wcqa\_ d1e9ma\_ d1l5pa\_ d1wria\_ d1i7ha\_  
d3av8a\_ d1czpa\_ d1rfka\_ d3p1ma1 d3b2ga\_ d2bt6a2 d2av4a1 d1wgqa1  
d1v89a1 d2coda1 d1zc3b\_ d1wg7a1 d1u5ea1 d1v61a1 d2coca1 d2ys1a1  
d1v5pa1 d1ntya2 d1wjma1 d1wil1a1 d1u29a\_ d1xx0a1 d1unqa\_ d2zkmx3  
d1fhoa\_ d1v88a1 d2adza1 d1x1fa1 d1p6sa\_ d2coaa1 d1btka\_ d1v5ma1

d1faoa\_ d2x18a\_ d1dyna\_ d1x1ga1 d4kaxb\_ d2j59m1 d1kilb2 d1xcga2  
d1txda2 d1u5da1 d1dbha2 d1wlha\_ d1upqa\_ d1v5ua1 d1foea2 d2fjla1  
d1eaza\_ d2dfka2 d2cofa1 d1kz7a2 d1r7ha\_ d1faaa\_ d1wika1 d1xfla\_  
d1ttza1 d2f51a1 d1ti3a\_ d1nhoa\_ d1sena\_ d2i4aa\_ d1lep7a\_ d1zmaa1  
d1fo5a\_ d3lefa1 d3diea1 d2yana1 d1z6na1 d1oaza\_ d3zywa1 d4aj8a\_  
d1nm3a1 d4fiwa\_ d1wmja\_ d4hs1a1 d1liloa\_ d1xwaa1 d1wjka1 d2vm1a\_  
d1fb6a\_ d1gh2a\_ d1h75a\_ d1nw2a\_ d1kx5b\_ d3a6na\_ d4m6ba2 d2nqbd\_  
d3wkjd\_ d2yfwe\_ d4h9na\_ d5bnxa\_ d1kx5c\_ d3r45a\_ d1eqzb\_ d4jjnb\_  
d1f66c\_ d1eqza\_ d4wnnb\_ d1kx5a\_ d1u35c1 d1id3a\_ d2nqbc\_ d1kx5d\_  
d1flea\_ d1b67a\_ d1tafa\_ d1bh9b\_ d1tafb\_ d1jfifb\_ d1q9ca\_ d1h3ob\_  
d2byka1 d1n1ja\_ d4g92b\_ d1bh9a\_ d1jfia\_ d1h3oa\_ d2bykb1 d1pd212  
d1nhya2 d2a2ra2 d1k0dd2 d1f2ea2 d1gsua2 d1f3ba2 d2fhea2 d2pvqa1  
d1tw9a2 d1oyja2 d1e6ba2 d1k0ma2 d3ik7a1 d4is0a1 d1r5aa2 d1jlva2  
d1m0ua2 d3gtub2 d1z9ha2 d1okta2 d1axda2 d2gsra2 d1tu7a2 d1k3ya2  
d1zgma1 d1gnwa2 d1gwca2 d2gsta2 d1glqa2 d1oe8a2 d1pn9a2 d1v2aa2  
d1fwla2 d1duga2 d1g7ea\_ d1ig8a1 d1czan2 d1czan3 d1czan1 d1ig8a2  
d1czan4 d1bg3a4 d1bg3a3 d1bg3a1 d1qqya\_ d1gd6a\_ d1livma\_ d2gv0a\_  
d1iiza\_ d2z2fa\_ d1j8xa\_ d1ghla\_ d1b9oa\_ d1741a\_ d1691a\_ d2o4wa\_  
d1p37a\_ d1k28a3 d1xjta1 d1jtma\_ d2f2qa\_ d4e97a1 d1g4ma2 d2pjsa1  
d1k1la\_ d2i7ra1 d1xqaa1 d5cj3a1 d1npba\_ d1jifa\_ d2p7oa\_ d1r9ca\_  
d1nkia\_ d1mpya2 d1kw3b2 d1kw3b1 d4ghga1 d1tfza1 d3isqa1 d3isqa2  
d1sqia1 d1sqia2 d1lkda2 d1lkda1 d1mpya1 d1cjxa2 d1cjxa1 d1sp9b2  
d1t47a1 d1t47a2 d1f1ua2 d1sp8a1 d1sp8a2 d1pv8a\_ d1w5qa\_ d2c1ha\_  
d1l6sa\_ d1qsta\_ d2beia1 d4m3sa\_ d1u6ma1 d1ygha\_ d1yk3a1 d3dr6a\_  
d1xmta\_ d1z4ea1 d2ge3a1 d1bo4a\_ d2fiaa1 d2jdca1 d1y9wa1 d3to7a\_  
d1wwza1 d2f14a1 d2ozua1 d2b5ga\_ d2cy2a1 d2p0wa\_ d1cm0a\_ d4pswa\_  
d1yrea1 d1yr0a1 d1m4ia\_ d2gana1 d1yvka1 d1ghea\_ d2g3aa1 d1y7ra1  
d2euia1 d1q2ya\_ d2fsra1 d1xeba\_ d2ae6a1 d1cjwa\_ d1qsmma\_ d2aj6a1  
d1y9ka1 d1i12a\_ d1vkca\_ d2atra1 d1n71a\_ d2d4pa1 d2fiwa1 d2fe7a1  
d1tiqa1 d2ou2a\_ d1yx0a1 d2fcka1 d1p0ha\_ d2j8ma\_ d2pq8a\_ d1z4ra1  
d1s3za1 d1ufha\_ d1xvqa1 d1pn0a2 d3hy2a\_ d2cvba1 d1o8xa\_ d1lu4a\_  
d1we0a1 d2bmx1a1 d2a4va1 d1psqa\_ d1xiya1 d1q98a\_ d1n8ja\_ d1zofa1  
d2ggta\_ d3tjja\_ d4je1a1 d1o73a\_ d3s9fa\_ d2zcta\_ d1qmva\_ d1jfua\_  
d2b1ka\_ d5dvba1 d2b5xa1 d2v2ga\_ d1st9a\_ d3tb2a\_ d41lra\_ d4fh8a1  
d1e2ya\_ d1knga\_ d2h30a\_ d1i5ga\_ d2z9sa\_ d2f8aa1 d1tp9a1 d2b7ka\_  
d1nm3a2 d3hvva\_ d2wfca1 d4kcea\_ d1xvwa1 d4gqca1 d3qpma\_ d4k1fa\_  
d1zsoa1 d1gp1a\_ d1prxa\_ d4od7a1 d1z6ma1 d4mcua1 d4dvca1 d1r4wa\_  
d3l9sa\_ d3rppa\_ d1rmka\_ d1ixta\_ d1eyoa\_ d1cnna\_ d1fu3a\_ d1glpa\_  
d1f3ka\_ d1fyga\_ d1etha2 d1w52x1 d2ppla1 d1hpla2 d1lpbb2 d2oxea1  
d1bu8a2 d1rp1a2 d1ys1x\_ d4hs9a\_ d1lspa\_ d1ex9a\_ d1ku0a\_ d3qmma\_  
d1bnla\_ d1dy2a\_ d4wfia\_ d4cg1a1 d3visa\_ d1jlia\_ d2rhwa\_ d3groa\_  
d1pjaa\_ d1ei9a\_ d2ftba\_ d1pmpa\_ d2rcqa1 d1fdqa\_ d4lkpa\_ d1sa8a\_  
d1vyfa\_ d1lpja\_ d3vg7a1 d4azqa1 d5bvqa\_ d1p6pa\_ d2qo4a\_ d1opba\_  
d1yiva1 d1o1va\_ d4bvma1 d4tkba\_ d4i3ba\_ d1bwya\_ d1ftpa\_ d1ggla\_

d4gkca\_ d1cbia\_ d3p6da1 d1kqwa\_ d2a0aa1 d3zxha\_ d1cgla\_ d1rm8a\_  
d1eaka2 d1hy7a\_ d2jsda\_ d1cxva\_ d1hv5a\_ d1i76a\_ d1eb6a\_ d3p0ya1  
d1lgra1 d1lgra2 d1n8yc2 d1n8yc1 d1m6ba2 d1m6ba1 d1dzka\_ d4tlja\_  
d2a2ua\_ d4wfva\_ d3t1da\_ d4iaxa\_ d3zq3a\_ d2nnda\_ d1i4ua\_ d1kxoa\_  
d1bbpa\_ d1kt7a\_ d1exsa\_ d3s26a1 d1lf7a\_ d1qfta\_ d4gh7a\_ d1z24a1  
d1qabe\_ d1xkia\_ d1ew3a\_ d3bx7a\_ d4iawa1 d1n0sa\_ d1gkab\_ d3kzaa\_  
d2k23a\_ d2l9ca1 d2joza1 d1gm6a\_ d3kffa\_ d3saoa1 d1e5pa\_ d1yupa1  
d1liua\_ d1jgta2 d1ea0a3 d1ecfa2 d1q15a2 d1ct9a2 d1ao0a2 d1te5a\_  
d1ohfc\_ d1i26a\_ d1cixa\_ d1y29a\_ d1v7fa\_ d2jtba\_ d1d1ha\_ d1g9pa\_  
d1lupa\_ d1qk7a\_ d1mb6a\_ d2a2va\_ d1niya\_ d1hvwa\_ d2mpqa\_ d1ie6a\_  
d1kqha\_ d1la4a\_ d2mxoa1 d1d10a\_ d1koza\_ d1qk6a\_ d1emxa\_ d1lqra\_  
d1c6wa\_ d1js9c\_ d1f15b\_ d1za7a\_ d1laja\_ d1rypd\_ d1lirua\_ d1rypc\_  
d3unfk\_ d1rypa\_ d1j2pa\_ d1lirui\_ d1j2qh\_ d3unfh\_ d1m4ya\_ d1rypb\_  
d1lirul\_ d1lirug\_ d1liru2\_ d1q5rh\_ d1rypg\_ d1g3ka\_ d1liruf\_ d1q5qa\_  
d1e94a\_ d1lirub\_ d1ryph\_ d3ty6a\_ d1liruj\_ d1liruk\_ d1rype\_ d1lirud\_  
d1lirue\_ d3mi01\_ d1rypf\_ d1liruh\_ d2z3ba\_ d3mka2\_ d1liru1\_ d1ny721  
d1ny722 d1a6ca3 d1a6ca2 d1a6ca1 d1pgl22 d1pgl11 d1ny711 d1mqta\_  
d1d4m3\_ d1fmd3\_ d2mev1\_ g1aym.1 d1ev13\_ d4q4w1\_ d1r1a3\_ d2x5ia\_  
d1rhi1\_ g1r1a.1 g1d4m.1 g1rhi.1 d1b35b\_ d1loopa\_ d1tme1\_ d4iv1a\_  
g1pvc.1 g1fpn.1 d1fpn1\_ d4gb31\_ d1d4m1\_ d1fmd1\_ d1ev11\_ d2wzr3\_  
g1cov.1 d1qqp3\_ g1fmd.1 d2x5ic\_ d1rhi3\_ g1oop.1 d1hxs1\_ d1fpn3\_  
d1bev1\_ g2mev.1 d1eah3\_ d1aym1\_ d1pvc3\_ d1qqp1\_ d1zba3\_ d1h8ta\_  
d3vbhc\_ g1b35.1 g1bev.1 d1hxs3\_ g1ev1.1 d1bev3\_ g1tmf.1 d1tmf1\_  
d1b35a\_ d2mev3\_ g1eah.1 g1h8t.1 d1eah1\_ d4q4w3\_ d1r1a1\_ d1aym3\_  
d1pvc1\_ d1zba1\_ d1h8tc\_ d1loopc\_ d1tme3\_ g1qqp.1 d4iv1c\_ g1tme.1  
d1y14b1 d2nn6i1 d1i941\_ d2zjra2 d1smxa\_ d2qamc2 d1hh2p1 d2r7da1  
d1r12a2 d1wfaq1 d3bzka4 d1x6oa2 d3a0ja\_ d2j01d2 d2ja9a1 d4q15a\_  
d1hr0w\_ d1l1uza\_ d2n3sa\_ d2vnud1 d1h95a\_ d1go3e1 d2nn6h1 d2mola\_  
d1iz6a2 d1jjga\_ d1e3pa2 d2ix0a3 d2ix0a2 d2lxja\_ d1ueba3 d1ueba2  
d2z0sa1 d1u0la1 d2ix0a1 d2eifa2 d2je6i1 d3i2za1 d2c35b1 d2ahob2  
d1t9ha1 d3i4oa\_ d2qall1 d1jt8a\_ d2nn6g1 d1g6pa\_ d3cama\_ d1i94q\_  
d1c9oa\_ d1d7qa\_ d2ba0a1 d2vnud2 d2vnud3 d1khia2 d2qalq1 d1wi5a1  
d1xtda2 d1ny4a\_ d3extra\_ d2ffca1 d2fdsa1 d3n3ma1 d2czda\_ d1q6oa\_  
d2yyua\_ d1vqta1 d1dbta\_ d3ldva1 d4lt9a1 d3tc7a1 d3hoja\_ d1i4na\_  
d3vnda\_ d3n18a1 d1geqa\_ d3naval d1v5xa\_ d4a2ra1 d3tc6a1 d1ujpa\_  
d4ijba\_ d1xcfa\_ d1vc4a\_ d1rd5a\_ d3b5va\_ d2r80b\_ d1cqa1 d1cg5a\_  
d1gcvb\_ d3boma\_ d2h8fb\_ d2raoa\_ d3bj1a\_ d4hrrb\_ d2r50a\_ d3d1kb\_  
d2aa1b1 d3zhwa\_ d3hf4b\_ d3gdja\_ d1jebb\_ d3bj1b\_ d1x9fb\_ d1wmub\_  
d1gcva\_ d3bcqb\_ d3d4xb\_ d1gvha1 d2dc3a\_ d3hf4a\_ d4yu3a\_ d3k8ba\_  
d1qpwb\_ d2r80a\_ d3bcqa\_ d1v4wa\_ d3wtgb\_ d1j17a\_ d4esaa\_ d1a9we\_  
d3d1lab\_ d1fsla\_ d4h21a\_ d1v4wb\_ d1mwca\_ d1vhba\_ d1jeba\_ d1spgb\_  
d1h97a\_ d1q1fa\_ d1tu9a1 d3d1aa\_ d1hdsb\_ d3hyub\_ d2zfb\_ d3fs4a\_  
d1oj6a\_ d1shrb\_ d4h21b\_ d4yu3b\_ d1spga\_ d3hrwa\_ d3qgra\_ d3at5a\_  
d4wchd\_ d3hyua\_ d1cg5b\_ d1uc3a\_ d1hbra\_ d2raob\_ d1outb\_ d4esab\_

d3gdjb\_ d3qqqa\_ d1x9fc\_ d3vrfa\_ dlitha\_ d3mkba\_ d3d4xa\_ d3mjpa\_  
d1jl6a\_ d3fh9a\_ dlouta\_ d2dc3b\_ dlit2a\_ d3eoka\_ d3g46a\_ dlqpwa\_  
d3vrfb\_ d1ch4a\_ d1x9fd\_ d1hdsa\_ d2zfa\_ d3mkbb\_ dlora\_ d3wtga\_  
d1a4fa\_ d3fh9b\_ d3bomb\_ d3cy5a\_ d3at5b\_ d1x9fa\_ d2oifa\_ d4lmbx\_  
d1cpcb\_ d3v57a\_ d1kn1a\_ d1cpca\_ d4f0ta\_ d2vjha\_ d4po5b\_ d1eyxa\_  
d1alla\_ d4f0tb\_ d1b33b\_ d1b8db\_ d4h0mb\_ d1b33a\_ d2vjhb\_ d4lm6b\_  
d2vmlb\_ d1allb\_ d2vjta\_ d3dbja\_ d2vmla\_ d2vjtb\_ d4f0ub\_ d1f99b\_  
d4rmpa1 d1liaa\_ d1eyxb\_ d2uulb\_ d4lmsb\_ d4f0ua\_ d2bv8a\_ d1f99a\_  
d2bv8b\_ d2c71b\_ d3dbjb\_ d4rmpb1 d1b8da\_ d4h0ma\_ d3v57b\_ d1liab\_  
d2uula\_ d2j96a\_ d3nqyb\_ d4gera\_ d1bqba\_ d1sfra\_ d1f0na\_ d4qeka\_  
d3c8da2 d2pbla1 d1jjia\_ d1lzl\_ d1jjfa\_ d2qvba\_ d2v9za\_ d4kafa1  
d1jmx4 d1pbya3 d1pbya4 d4iuaa3 d4bvva\_ d5hpga\_ d3k65a\_ d1ki0a3  
d1ki0a2 d1ki0a1 d1a0ha1 d1pmla\_ d3sp8a3 d2feba1 d3l21a\_ d2e1da\_  
d1to3a1 d1w3ia\_ d1sfla\_ d1n7ka\_ d1vcva1 d4imea\_ d1wa3a\_ d2ocza1  
d1f2ja\_ d3m16a\_ d2yxga\_ d1ub3a\_ d3a5fa\_ d1fbaa\_ d1l6wa\_ d1xfba1  
d1wx0a1 d1vpxa1 d1ojxa\_ d1mxsa\_ d2a4aa1 d1xkya1 d3cq0a1 d3s1xa\_  
d1f05a\_ d1fdja\_ d3cpra1 d4d2ja\_ d4mh8a\_ d4i7ga1 d3rp2a\_ glucy.1  
d1fuja\_ d2zchp\_ d3w94a\_ d1si5h\_ d1l06a\_ g2pka.1 d1cgha\_ d1kigh\_  
d1a5ia\_ d3s9ba\_ d1hj8a\_ d1ao5a\_ d2anya\_ d1q3xa1 d1gvza\_ d1azza\_  
d4gsoa\_ d2f91a1 d1iaua\_ d1eufa\_ g1fiw.1 d1eq9a\_ d4nfea\_ d2rdla\_  
d1spja\_ d1elva1 d1a7sa\_ d1ekbb\_ d1pfxc\_ d1yc0a\_ d2aiqa\_ g1fiz.1  
d1fi8a\_ d4k60a\_ d4dgja\_ d1mzaa\_ d1op0a\_ d3tjva\_ d1pytd\_ d1sgfg\_  
g1gg6.1 d2eeka\_ g1rtf.1 d1a0ja\_ d3g01a\_ d1pytc\_ d4e7na\_ d1ddja\_  
d1z8ga1 d2hlca\_ d1npma\_ d1brup\_ g1jou.1 d1sgfa\_ d1autc\_ g2hnt.1  
g1kdq.1 d1orfa\_ d3s69a\_ d4crga\_ d1fxya\_ d1bqya\_ d1mbma\_ d3su6a1  
d1cula1 d4agka\_ d1vcpa\_ d1q31a\_ g1n11.1 d3e90b\_ d1ep5a\_ d3u1jb\_  
d1jx4a2 d3gv5b1 d1t94a2 d3bq0a2 d4lu0a\_ d1of8a\_ d3unda1 d3e9aa1  
d1vr6a2 d1n8fa\_ d2qkfa\_ d1d9ea\_ d1o60a\_ d1e69a\_ d1mv5a\_ d3g60a4  
g1ii8.1 d1ewqa2 d1ji0a\_ d1qhla\_ d1v43a3 d2wmfa1 d1vpla\_ d1g2912  
d4a82a2 g1f2t.1 d2d62a1 d3tuic1 d2bbsa1 d3g60a3 d2ixea\_ d1sgwa1  
d2qi9c\_ d3rlfa1 d3b60a1 d3d31a2 d2pzea1 g1xew.1 d1jj7a\_ d1oxk2  
d2onka1 d1wlwa\_ d1iwea\_ d1qf5a\_ d1vmaa2 d1nija1 d1np6a\_ d2p67a1  
d3ihla\_ d1ls1a2 d1slma2 d1liona\_ d2v40a\_ d1dj3a\_ d3hida\_ d2vola1  
d2g0ta1 d1vcoa2 d1j8mf2 d1g3qa\_ d1xjca\_ d1p9ba\_ d1qzxa3 d1lihua2  
d1lihua1 d2qm8a\_ d1dj2a\_ d4ioja\_ d1cp2a\_ d1yrba2 d1hyqa\_ d3gqba2  
d1skye3 d1xp8a1 d1tf7a2 d1tf7a1 d1ye8a1 d1skyb3 d2qe7d2 d4blta\_  
d4huta\_ d3ldaa2 d4hyya\_ d2i3ba1 d1cr1a\_ d3j9tb2 d3ntua2 d1vdza1  
d2z43a\_ d1e9ra\_ d1nlfa\_ d3ziaa2 d1n0wa\_ d1g6oa\_ d3ziad2 d3j9ta2  
d1pzna2 d3gqbb2 d2i49a\_ d1nnfa\_ d1xvxa\_ d1ursa\_ d1h3da1 d1iuda\_  
d4m1va1 d1twya\_ d3e13x\_ d2nxoa1 d4pfua\_ d3ttma\_ d1elja\_ d2qmw1  
d1us5a\_ d1y3na1 d1jeta\_ d1uqwa\_ d4f19a1 d2esna2 d3thia\_ d3fasa1  
d2uyeb\_ d2xwva1 d1r9la\_ d2fyia1 d1pb7a\_ d2ozza1 d1sw5a\_ d1nh8a1  
d1vr5a1 d2g29a\_ d1xs5a\_ d3lswa\_ d2z23a\_ d3w9va\_ d3tcha\_ d1q35a\_  
d1z7me1 d3q27a\_ d1p99a\_ d1ve4a1 d2i6ea1 d4mcoa1 d4n8ya\_ d1eu8a\_

d1zbma1 d1hsla\_ d1ixca2 d1j1na\_ d1xvya\_ d1y9ua\_ d2z22a1 d1xoca1  
d4oera\_ d1wdna\_ d5f1qa1 d1xt8a1 d1i6aa\_ d4gwoa\_ d4igta1 d1pc3a\_  
d4mmpa1 d1o63a\_ d2czla1 d2onsa2 d4mija1 d4ok5a1 d2bmfa1 d2bmfa2  
d1ykxa1 d1ykxa2 d2qeqa1 d2j1qa1 d1a1va2 d1eh3a\_ d3skpa\_ d1dtza2  
d1ieja\_ d1jnfa2 d1ce2a1 d1jnfa1 d1b1xa2 d1b1xa1 d1jw1a1 d1jw1a2  
d1ryoa\_ d1h76a1 d1h76a2 d1c4oa1 d2p6ra3 d2p6ra4 d1oywa2 d1oywa3  
d1wrba1 d1w36b2 d1w36b1 d1c4oa2 d3bora\_ d1t6na\_ d2eyqa5 d2eyqa3  
d2eyqa2 d2zu6a2 d1veca\_ d1w36d1 d2g9na1 d1z3ix2 d2rb4a\_ d1hv8a1  
d1hv8a2 d1t5ia\_ d1w36c2 d2j0sa2 d2j0sa1 d1fuka\_ d3hjha1 d1z5za1  
d1qdea\_ d1z63a1 d1s2ma2 d1s2ma1 d1wp9a1 d1wp9a2 d1gm5a3 d1gm5a4  
d3dina4 d3dina3 d1q0ua\_ d1w36c1 d1z3ix1 d1nkta3 d1nkta4 d1uaaa2  
d1w36d2 g1qhh.1 d2fwra2 d2fwra1 d3q3ma\_ d1za0a1 d1mxra\_ d2inca\_  
d1jk0a\_ d2incb\_ d1mhyb\_ d3hf1b\_ d1mtyb\_ d1r2fa\_ d2uw1a\_ d3n37a\_  
d1afra\_ d1oquc\_ d1syys\_ d1mtyd\_ d2o1za\_ d1uzra\_ d1smsa\_ d2fkza\_  
d1zujal d1s3qa1 d2fjca1 d1z6om1 d1veia\_ d4dyys\_ d1jiga\_ d3gvys\_  
d2pyba\_ d4cy9a1 d3bvfa1 d1r03a\_ d2cf7a\_ d1nf4a\_ d1zs3a1 d4iwka\_  
d3ka8a\_ d3np0x\_ d1n1qa\_ d1lb3a\_ d4e6ka\_ d1z6oa1 d2fzfa1 d4dyua\_  
d3ge4a\_ d4am4a\_ d2z6ma\_ d1ji5a\_ d1vlga\_ d1lkoa1 d1krqa\_ d3qz3a\_  
d1o9ra\_ d2ffxj\_ d1euma\_ d1yv1a1 d2v2pa\_ d1j30a\_ d4di0a\_ d1dpsa\_  
d2cbia2 d2choa2 d1l8na1 d1oewa\_ d2qzxa\_ d2asia\_ d1psoe\_ d1miqa\_  
d1smra\_ d2h6ta\_ d1pfza\_ d1lizda\_ d3hd8a\_ d1j71a\_ d1dpja\_ d4aa9a\_  
d1t6ex\_ g1b5f.1 g1lya.1 g1htr.1 d1qdma2 d1bxoa\_ d1wkra\_ d1tzsa\_  
d1libqa\_ d2qzwa\_ d1bdqa\_ d3ggta\_ d3ixoa\_ d1mrxs\_ d2haha\_ d1tw7a\_  
d4njsa\_ d1sgua\_ d2p3da\_ d1nsoa\_ d3d3ta\_ d2rkfa\_ d1c6ya\_ d2rspa\_  
d3ogpa\_ d3ekwa\_ d2o4na\_ d2j9ja\_ d1baia\_ d3ggua\_ d3lzua\_ d4npua\_  
d4j55a\_ d2r8na\_ d2fxda\_ d2p3ca\_ d4dqa\_ d3ttpa\_ d3t3ca\_ d2p3aa\_  
d2hc0a\_ d2fdda\_ d3mwsa\_ d1k8rb\_ d1wgra1 d1ef5a\_ d1wfyal d1e8ya3  
d1wgyal d1lfda\_ d2cs4a1 d1wxma1 d2byeal d3kh0a1 d2byfal d1wxaa1  
d1h4ra3 d4yl8a1 d2a16a3 d1wgda1 d1wggal d4q5eb\_ d1wjnal d1se9a\_  
d3n3kb\_ d1wz0a1 d1we6a1 d2m0xa\_ d2gbka\_ d3rt3b1 d1wh3a1 d1sifa\_  
d2ekec2 d4ii2b1 d4hk2a1 d1c3ta\_ d1m94a\_ d1wghal d1ttnal d1j8ca\_  
d1wx8a1 d3v6cb1 d2ma9b\_ d4i6lb1 d1bt0a\_ d2jvca1 d1iyfa\_ d2k1fa\_  
d1wxval d1wf9a1 d1t0ya\_ d2io0b2 d1x1ma1 d2gbma\_ d1zw7a1 d2m17a\_  
d1ud7a\_ d1we7a1 d2lwpa\_ d2gbja\_ d1wjua1 d1v6ea1 d1v86a1 d4eewa\_  
d1wiaa1 d4icva\_ d4gu2a\_ d1wx7a1 d1wy8a1 d4hjka1 d2faza1 d1v5oa1  
d2a13a1 d2cr5a1 d1wj4a1 d1s3sg\_ d3ubra\_ d1qo8a1 d1d4ca1 d2k3va\_  
d1ft5a\_ d1qdba\_ d1m1qa\_ d2j7aa\_ d1h21a\_ d1ogyb\_ d4fasa\_ d1oaha\_  
d1sp3a\_ d1qoza\_ d5ajha1 d3h33a\_ d1rwja\_ d19hca\_ d1os6a\_ d3bxua\_  
d3h4na\_ d1i77a\_ d3caoa\_ d1j0pa\_ d2ctha\_ d1duwa\_ d1ofwa\_ d2e84a\_  
d1hh5a\_ d1gyoa\_ d3h34a\_ d1wioa4 d1ccza2 d1vcaa1 d1dr9a2 d2d9qb1  
d2nxyb2 d1um8a\_ d1ixza\_ d1qvra2 d1qvra3 d1qzma\_ d1sxjc2 d1jr3d2  
d2p65a\_ d1l8qa2 d1g8pa\_ d3hu3a3 d1sxjd2 d1njfa\_ d1in4a2 d1sxja2  
d1tuea1 d2ce7a2 d1w5sa2 d1sxjb2 d1d2na\_ d1ny5a2 d1ofha\_ d2gnoa2  
d2a5yb3 d1fnna2 d1u0ja1 d1lv7a\_ d2fnna2 d1ixsb2 d4gita\_ d1sxje2

d1g41a\_ d2e3fa\_ d1mm0a\_ d2e3ea\_ d211da\_ d2ny8x\_ d2e3ga\_ d2ny9x\_  
d2nz3a\_ d21j7a\_ d1n4na\_ d2m8bb1 d2kyqa\_ d3psma\_ d1jxca\_ d2g11a\_  
d1ugla\_ d4uj0a\_ d2k4ua\_ d1hp2a\_ d21u9a\_ d1baha\_ d2meoa1 d1wm7a\_  
d1hlya\_ d1n8ma\_ d1j1za\_ d1wpda\_ d1c55a\_ d1pvza\_ d1wt7a\_ d1rjia\_  
d1wz5a\_ d1m2sa\_ d1pjva\_ d1c49a\_ d1qkya\_ d2ktca1 d1wmta\_ d1du9a\_  
d1j5ja\_ d1r1ga\_ d1t0za\_ d2i61a\_ d1t1ta\_ d1sn4a\_ d1kv0a\_ d21kba\_  
d1npia\_ d1wwna\_ d1pe4a\_ d2kbka\_ d21i7a\_ d1djta\_ d2kbha\_ d1dq7a\_  
d1sega\_ d1omya\_ d1zywa1 d1jzaa\_ d2jca\_ d1n9wa1 d1bbua1 d1e1oa1  
d1b8aa1 d110wa1 d3a74a1 d1eova1 d1bvsa3 d1iyjb4 d1iyjb5 d1iyjb3  
d1o7ia\_ d4ipca1 d1x3ea\_ d4apva\_ d1jb7a1 d1jb7a2 d1jb7a3 d3kdfa\_  
d1uelb\_ d1wjja1 d3eiva\_ d1xjva2 d1xjva1 d2ccza2 d1se8a\_ d111oc\_  
d1jb7b\_ d1qvca\_ d3ulla\_ d1qzga\_ d1miua4 d1miua5 d1miua3 d3g48a1  
d1mkha\_ d1jjcb3 d1pyba\_ d3ubub\_ d1legia\_ d1qo3c\_ d1v7pa\_ d1tdqb\_  
d3ubua\_ d1c3ab\_ d1h8ua\_ d3bx4b\_ d1t8ca1 d1sb2a1 d1qdda\_ d2ziba1  
d3cada\_ d1byfa\_ d1j34b\_ d1jwia\_ d1jzna\_ d1c3aa\_ d1oz7b\_ d1wmza\_  
d3bdwb\_ d1hq8a\_ d1fifa1 d1dv8a\_ d3hupa\_ d1wk1a1 d1umra\_ d2afpa\_  
d3bx4a\_ d1gz2a\_ d1sl6a\_ d1v7pb\_ d3g8ka\_ d1ixxa\_ d1j34a\_ d1jwib\_  
d1g1sa1 d1y17a1 d1ja3a\_ d1fvub\_ d3bdwa\_ d1sb2b1 d1fvua\_ d1umrc\_  
d1oz7a\_ d4m17a\_ d3cfwa1 d1ypqa1 d1g1ta1 d3fd4a\_ d319jc\_ d4dn8a1  
d1v41b\_ d2msba\_ d1pfsa\_ d2a1ka\_ d1je5a\_ d1rpma\_ d1yfoa\_ d118ka\_  
d2ooqa1 d1g4us2 d1p15a\_ d1lara2 d1lara1 d1wcha\_ d2fh7a2 d2fh7a1  
d3azya\_ d3wvja\_ d1upsa1 d1ajoa\_ d2hyka\_ d1ajka\_ d2vy0a\_ d1o4ya\_  
d3o5sa\_ d3d6ea\_ d3atga\_ d1dypa\_ d1umza\_ d3i4ia\_ d1c11a\_ d41bqa\_  
d1a78a\_ d1slta\_ d4no4a\_ d3zsja\_ d3duia\_ d1g86a\_ d1is3a\_ d1hlca\_  
d1tdha3 d1q3ba3 d1ee8a3 d1k82a3 g1len.1 d3zyra\_ d1fnua\_ d1n47a\_  
g21tn.1 d1avba\_ d3usua\_ d1dhkb\_ d1f9ka\_ d1lukga\_ d1g8wa\_ d1g9fa\_  
d1wbfa\_ d3wcsa\_ d1g7ya\_ g1loe.1 d1mvqa\_ d1hq1a\_ d1v6ia\_ d1dbna\_  
d1qnwa\_ d1fx5a\_ d418qa\_ d1ioaa\_ d3n35a\_ d1epwa1 d2h0ba\_ d2erfa\_  
d1h30a2 d1h30a1 d3mw4a1 d1pz7a\_ d2r1ba\_ d3v64a1 d1d2sa\_ d3bopa1  
d3mw3a1 d1okqa1 d1dszb\_ d1a6ya\_ d3cbb\_ d1ynwa1 d1r4ia\_ d1hcqa\_  
d2hana\_ d2hanb\_ d2enva1 d1kb4b\_ d2n11b\_ d11o1a\_ d1cita\_ d2dara2  
d2dara1 d1wyha2 d2d1oa2 d1rutx4 d1rutx3 d2cuqa2 d1x41a2 d1x41a1  
d1x3ha2 d1x3ha1 d2d8za1 d1x61a2 d1x6aa1 d1x6aa2 d2cora2 d2cora1  
d1v6ga1 d1v6ga2 d2d8za2 d1x64a1 d1x64a2 d1b8ta1 d2co8a1 d1x63a2  
d2dj7a2 d2dj7a1 d2cu8a2 d2cu8a1 d1g47a2 d1g47a1 d1j2oa1 d1wyha1  
d2d1oa1 d1wiga1 d1wiga2 d2cupa2 d2cupa3 d1x68a1 d2d8ya2 d2d8ya1  
d1m3va2 d1x62a1 d1x68a2 d1x61a1 d1b8ta3 d1b8ta2 d2d8xa2 d2d8xa1  
d1x4ka1 d1x4ka2 d2cuqa1 d1m3va1 d2co8a2 d1j2oa2 d1x63a1 d2cura1  
d2cura2 d1x62a2 d1op9a\_ d1y01a1 d1letzb1 d1legj11 d2gsib1 d1nj9a1  
d4jfhdl d1aqk11 d1t2ja\_ d11o4h1 d1zvy1 d3v4v11 d4enec1 d1kxtb\_  
d5e8ea1 d2pxya\_ d4weud\_ d1xiwc\_ d2esvd1 d1qnzh\_ d1logae1 d1f4xh1  
d4n1hb\_ d3ezjb1 d3mlw11 d1kfah1 d1etza1 d1b4jh1 d3cfic\_ d4w68a\_  
d2arja1 d1ek3a\_ d2ok011 d1vera\_ d1uwgh1 d1blnb1 d1fpth1 d1rzga1  
d2giya1 d4m3kb1 d1nc2a1 d2nyyd1 d1ncna\_ d1fbih1 d5dxwa\_ d4fqqa1



d1dqdh1 d1jfq11 d1kelh1 d1faih1 d1frgl1 d1figl1 d4m6n11 d1fo0a\_  
d4hxb11 d3b5ga\_ d3quyd1 d2h9gb1 d1i8kb\_ d2dd8h1 d2ck0h1 d1eaja\_  
d4w6wb1 d2a6ib3 d1t66d1 d2e27h\_ d1ob1b1 d1f11b1 d2v7na1 d1ad0a1  
d2xt1b1 d1pskh1 d4i13b1 d2op411 d1a0q11 d1uwell1 d1za3a1 d1ncb11  
d4uu9a\_ d1bm3h1 d1cloh1 d1nqba2 d1cf8h1 d4y5va\_ d1mhph1 d5anma1  
d4cdgc1 d4ldeb\_ d1y0lb1 d2pcpb1 d1z3gl1 d1dfb11 d1fh5h1 d3g5xa1  
d1tzib1 d4dn311 d3zhka1 d2b1hh1 d2uyl1a1 d1f3dh1 d1nj9b1 d2agjh1  
d2h1pl1 d1q72h1 d8fabbb1 d1ndmb1 d1rjca1 d4u6hb1 d3upca\_ d2fbj11  
d1osph1 d1tvda\_ d2cjev\_ d4fhd1 d1bd2d1 d1rz7h1 d3nn8a\_ d1blna1  
d1knoa1 d1nfda1 d2bmkb1 d1dq11\_ d1igyb1 d1igf11 d12e8h1 d3utza1  
d1nc2b1 d1rihh1 d4mwfb1 d4jvpa1 d1mieh1 d1rhfa1 d1fgn11 d1sbsb1  
d1lp9e1 d1dn0a1 d4lqf11 d1iaih1 d1kgcd1 d1mh5b1 d1gpol1 d2g60h3  
d1f8t11 d2jixd1 d4grwh\_ d1fo0b\_ d1bfob1 d1axsa1 d1u9ka\_ d1nmbh\_  
d1h8na1 d1h8na2 d1jguh1 d4eura1 d3sdy11 d35c8h1 d1w7211 d1mvub\_  
d1i9rh1 d1ob1a1 d4wenb\_ d1yeeh1 d3ietc1 d1f58h1 d1ad0b1 d1mqk1\_  
d1nbvh1 d4b50a\_ d3r8bb\_ d1baf11 d1mamh1 d4rgne1 d2gsgb\_ d35c811  
d1bafh1 d1aih1 d2pcpa1 d2fath1 d2x1pa\_ d1orsb1 d1ibgl1 d1shma\_  
d1a2yb\_ d1u0qa\_ d2coqa\_ d1hilb1 d1qfwi\_ d1jv5b\_ d1fn4b1 d5e0qa\_  
d1nsnh1 d1plgl1 d4ocx11 d1kb5h1 d1rzfh1 d1pg7x1 d2fx7h1 d2oi9c\_  
d1l7i11 d3eyva1 d1d5i11 d4ffyl\_ d1tet11 d1a6wh\_ d1ac6a\_ d3dvfa\_  
d1nfdel d1mimh1 d1ri8a1 d1jhlh\_ d3dura\_ d1fskb1 d1f97a1 d3so3b1  
d2ak4d1 d1lp9f1 d4z7wf1 d1l7th1 d4y5ya\_ d4x7ec1 d1emth1 d1ikf11  
d1nlbh1 d4uta11 d1bjma1 d1eapb1 d1u6ah1 d2dtgd1 d1kj2b\_ d1xeda1  
d1cleh1 d1fgvh\_ d2bnub1 d2fb4h1 d2dtgb1 d1ktrh\_ d1jpth1 d1qkz11  
d4hepg\_ d2atpb1 d1flrh1 d2hrpl1 d1mvfa\_ d1iaim1 d3k80a1 d2jb5h1  
d3zkxc\_ d4grwe\_ d1it9h1 d1rhhb1 d3w9ec\_ d1e4wh1 d1sy6h1 d2j6eh1  
d3qxta\_ d1jglh1 d1p7ka1 d1tzhb1 d4n8pa1 d1gaf11 d2jelh1 d1wioa2  
d4i0cc1 d1cicb1 d1lmka2 d1lmka1 d1iqwh1 d1orqb1 d1ejoh1 d1jnlh1  
d4zg1a\_ d43c9b\_ d1ggb11 d1wejh1 d3q6fa1 d1f3dj1 d3c6la1 d1bqlh1  
d3p9wb\_ d1a3r11 d1h0db1 d2uzil\_ d1eo811 d1qfw1\_ d1n7ml1 d1igja1  
d1c5ch1 d2a9mh\_ d1rmfh1 d1fj1b1 d4heme\_ d1ccza1 d1a5fh1 d1ogad1  
d1dlfh\_ d1qa9b\_ d1vgel1 d3qskb\_ d1sjxa\_ d4ozfg1 d1sq2n\_ d1qd0a\_  
d1kcvh1 d1c5db1 d3qcull1 d3bn9d1 d1mjuh1 d4y8dc\_ d7fabh1 d3dvgb1  
d1l0011 d1a6tb1 d1gigh1 d1kcrh1 d2hwz11 d1yjdc1 d3clfl1 d4krna\_  
d1dl71\_ d1e6o11 d1mexh1 d3r0ma\_ d4kkna\_ d1fns11 d1loaqh\_ d1rzia1  
d1ucbh1 d1ncw11 d4b41a\_ d1nfd1 d2mpah1 d2d7t11 d4grwf\_ d4b5ea\_  
d1l1k3h1 d3u79a\_ d4u3xa\_ d1ghf11 d1bvk\_ d1mcw11 d1b88a\_ d1jrhh1  
d32c2b1 d4wemb\_ d1dsfh\_ d1op3h1 d1ce111 d1iqda1 d1qoka1 d1qoka2  
d1qfuh1 d2crya1 d1ay1h1 d1oaql\_ d3ab0b\_ d1rur11 d1t4kb1 d1bz7b1  
d1n0xh1 d1for11 d1ucb11 d4w6yb\_ d43c9a\_ d2aab11 d1tzia1 d4n1ca\_  
d1k6qh1 d3g9ab\_ d4tvsa1 d1ligmh\_ d1pz5b1 d3dx9a1 d3wxwh\_ d1nakh1  
d1kcull1 d3eaka\_ d4qlra1 d1cr911 d1d9ka\_ d1f4x11 d1deea1 d2i27n2  
d1c12a1 d2orb11 d1j8hd1 d1mcph1 d1c5da1 d1kenh1 d1bd2e1 d1h5ba\_  
d4x7fc1 d3upaa\_ d1t3fa1 d1indh1 d2dtgc1 d4hc111 d1zv5a1 d4wgvb\_

d1uwg11 d4f37k1 d1aqkh1 d1vesa\_ d3zkqd\_ d1fpt11 d1lo4l1 d1knob1  
d3rrqa\_ d1ct8b1 d4orz\_ d1mlbb1 d4hgkc1 d1dqd11 d1bogb1 d4ozhe1  
d1dr9a1 d1i7za1 d1dn0b1 d1kell1 d1rzi1 d1ypzf1 d1wtla\_ d1hkfa\_  
d1fail1 d1figh1 d2vyre\_ d1sjva\_ d1ohqa\_ d1bfoa1 d1pkqb1 d1mjul1  
d1b4jl1 d1nsl1 d2arjb1 d1p4bh\_ d4aj0a\_ d3nn8b\_ d2rcja1 d1f2xk\_  
d4v1dd\_ d1adqh1 d2eksa\_ d4k3ga\_ d1jfqh1 d1uweh1 d1frgh1 d4gftb\_  
d1uz8b1 d4nlea\_ d1bm3l1 d1clol1 d3mcka1 d2vqla1 d1ae6h1 d4aq1b1  
d1uj3b1 d1nbqa1 d1fh5l1 d2ck0l1 d2ywza\_ d1q72l1 d4nxb\_ d1hila1  
d4hzb1 d2j88l1 d1zmya1 d1cd0a\_ d1a4ka1 d1psk11 d1a0qh1 d4krmb\_  
d1ncbh1 d2fbjh1 d1j8he1 d1i3ua\_ d1cf8l1 d1fe8h1 d2plya1 d1eeqa\_  
d2x89a\_ d1ol0a\_ d2r0lh1 d1ub5a1 d1dfbh1 d3eyvb1 d4jdvb1 d4p2cg\_  
d2gsia1 d2agjl1 d1u3ha1 d2h1ph1 d1rih1 d1fskc1 d1boga1 d2a77l1  
d1osp11 d1qfoa\_ d3dwta\_ d2fx7l1 d1rz7l1 d3stba1 d1pkqa1 d1b6da1  
d1dzba2 d1dzba1 d1kj2a\_ d4l1ha\_ d1rzgb1 d1dqlh\_ d12e8l1 d1mie11  
d1jmaa\_ d1sbs11 d1fgnh1 d1f58l1 d1mqkh\_ d1ndgb1 d3qegl1 d1ia11  
d2aw2a1 d1tqbc1 d3fo2a1 d4dkaa\_ d1f8th1 d2g60l1 d2ywy\_ d1uj3a1  
d1yc7a\_ d3bd3a\_ d4w6xb1 d1nmb1\_ d1i8ka\_ d1rjlb1 d1ypze1 d1p7kb1  
d1kxqe\_ d1gpoh1 d2z4qa1 d1w72h1 d1i9rl1 d4qgya1 d4xt1c\_ d2qqnh1  
d1cica1 d3c08h1 d2cd0a\_ d2bdnh1 d1hnga1 d1mam11 d1nldh1 d1cr9h1  
d4lcih1 d3bkyh1 d3qg7l1 d1ai1l1 d1kxvc\_ d4iosd\_ d1l7ih1 d2x1qa\_  
d1ub6b1 d3k74b\_ d1ibgh1 d1teth1 d1igya1 d1hxma1 d2x6ma\_ d2e7la\_  
d5e03a\_ d1qfwm\_ d2r0kh1 d1igjb1 d1rurh1 d1plgh1 d1mj8h1 d1yuhb1  
d3fmg11 d1rzfl1 d1emt11 d1ad9b1 d1igtb1 d1nlb11 d1d5ih1 d3k7ua\_  
d4ffyh\_ d1bwwa\_ d3dvga1 d1a6ta1 d1fgvl\_ d4qxgl1 d1mim11 d1jh11\_  
d2hffb1 d2hh0l1 d1qkzh1 d1l7t11 d1afvh1 d1iaii1 d2cjuh\_ d1um5h1  
d2ghwb2 d2ghwb1 d1kgce1 d2fgwh1 d1ikfh1 d1dvfd\_ d2i24n1 d2xtjb\_  
d1za3b1 d2yc1a\_ d2hh0h1 d2x1oa\_ d1bvka\_ d1rjla1 d5e7ba1 d1lgtal  
d1i11b1 d2fb4l1 d1mvua\_ d1jpt11 d32c2a1 d1fvca\_ d1iqdb1 d2hrph1  
d2p4ab\_ d4qo1a\_ d1p2cb1 d1wt5c\_ d1t4ka1 d5c1mb\_ d1it9l1 d1bz7a1  
d1b2wh1 d1e4wl1 d1jnl11 d1yedb1 d1za6b1 d3u7aa\_ d1igfh1 d3gnml1  
d1orsa1 d1wejl1 d1a2ya\_ d1hxmb1 d1gafh1 d2j4wh1 d1pz5a1 d1j05a\_  
d1a3rh1 d4fq1l1 d1qfwh\_ d1eo8h1 d1n7mh1 d4s11a\_ d1kegh1 d5da4a\_  
d1iqw11 d3whxb1 d1vgeh1 d1deeb1 d1c12b1 d1t2ql1 d1ad9a1 d3gsnb1  
d3b2uc1 d1ggbh1 d1t3fb1 d1nak11 d4ocmc\_ d1lila1 d2v7hb3 d2esve1  
d1mcoh1 d2qr0b1 d2q3aa\_ d1ct8a1 d1kcr11 d2pxyb\_ d2uzih\_ d5c3ld\_  
d3durb\_ d1c5c11 d2ak4e1 d1d17h\_ d1xiwd\_ d1mlba1 d1rmfl1 d1i7zb1  
d1dlfl\_ d2xa3a\_ d5bq7b1 d1dqqb1 d3h42l1 d1egjh1 d1kcv11 d1fe8l1  
d2j6e11 d1f3rb2 d1l1k3l1 d1sm3h1 d1q0xh1 d1ghfh1 d7fab11 d1igch1  
d1lo0h1 d4idla\_ d5c2b1\_ d1jrh11 d1lila1 d3zhda1 d4kfzc\_ d1b0wa\_  
d1e6oh1 d1mexl1 d4krpb\_ d1fnsh1 d1ncwh1 d4hgma\_ d4eigb1 d4rzca\_  
d2mpa11 d4y5xa\_ d5en2b1 d3lrga1 d4ej1c1 d1rhha1 d1j05b\_ d1forh1  
d1q9wb1 d2wzpd\_ d2aq2a1 d1h0da1 d3revb1 d2ij0c1 d1tzha1 d4m7jl1  
d1k6ql1 d3b9kc1 d1igml\_ d3qeua1 d1dsfl\_ d1ce1h1 d1kcu11 d1zvha1  
d1zvoa1 d1tqbb1 d1ay1l1 d2qsc11 d2cgrh1 d1nl0h1 d1ken11 d3eo0a1

d4n9ob1 d1n0x11 d3k1kc\_ d2cqva1 d1fhga\_ d2k1ma\_ d2d12a1 d1biha3  
d1biha1 d1biha4 d3qp3a1 d1g1ca\_ d1gxea\_ d1cvsc2 d1cvsc1 d1xmwa2  
d1m4ka2 d2otpa2 d1biha2 d1rhfa2 d2fcba2 d2fcba1 d1wwbx\_ d1gsma2  
d1lepfa1 d1lepfa2 d2dava1 d1waaa\_ d1f97a2 d1x44a1 d1vcaa2 d1fn1a2  
d1fn1a1 d3b5ha2 d3h8na2 d3h8na1 d1jbja1 d1jbja2 d1pd6a\_ d1f2qa2  
d1f2qa1 d3cx2a\_ d1nbqa2 d3b5ha1 d1n26a1 d1xiwb\_ d1xaua\_ d1fltx\_  
d2ifga1 d1olla1 d1olla2 d1cs6a4 d1cs6a3 d1cs6a2 d1cs6a1 d2gw5a2  
d1sy6a1 d1xiwa\_ d1lucta2 d1lucta1 d1ry7b2 d1gl4b\_ d1qz1a3 d1olza1  
d2c9aa1 d1wwca\_ d2aq2b1 d1ck1a1 d1lenfa1 d1i4pa1 d1v1oa1 d1et9a1  
d1esfa1 d2g9hd1 d4ohja1 d1klud1 d1bxta1 d1ty0a1 d1fnua1 d1c4qa\_  
d1prtcl d2wv6d\_ d1prtfl\_ d1l1trd\_ d4l63b1 d1r4pb\_ d1prtd\_ d1tl0f\_  
d2bosa\_ d1prtb1

**Family-76 (c.67.1.1)**

**Positive dataset contains 11 protein sequences.**

d1u08a\_ d3pd6a\_ d4wlha\_ d1v2da\_ d1v72a1 d1svva\_ d1wsta1 d2f8ja2  
d1vp4a1 d1xi9a1 d2gb3a1

**Negative dataset contains 3970 protein sequences.**

d1xfda2 d1sefa\_ d1sfna\_ d1rc6a\_ d3i2ka1 d1lnsa3 d2tbvc\_ d1c8nc\_  
d1x36a\_ d1smvc\_ d1ng0c\_ d4sbvc\_ d1lopoa\_ d1f2nc\_ d1ddla\_ d1e57b\_  
d1f56a\_ d1bypa\_ d1azca\_ d1ws8a\_ d3u25a\_ d1cuoa\_ d1id2a\_ d1rkra\_  
d2iaac\_ d4dp1x\_ d1nwpa\_ d2gima\_ d2i7sa\_ d1qhqa\_ d3ehbb1 d1fftb1  
d1gyca3 d1hfua2 d1kbva1 d1kbva2 d1sdda1 d1sdda2 d1gyca1 d1gyca2  
d1mzya1 d2bw4a1 d1aoza1 d1aoza3 d1aoza2 d1kyaa2 d1kyaa3 d1kyaa1  
d1mzya2 d4e9sa1 d1sddb1 d1sddb2 d1hfua1 d1hfua3 d1oe1a2 d1oe1a1  
d1v10a2 d1v10a3 d1v10a1 d2dara2 d2dara1 d1wyha2 d2dloa2 d1rutx4  
d1rutx3 d2cuqa2 d1x41a2 d1x41a1 d1x3ha2 d1x3ha1 d2d8za1 d1x61a2  
d1x6aa1 d1x6aa2 d2cora2 d2cora1 d1v6ga1 d1v6ga2 d2d8za2 d1x64a1  
d1x64a2 d1b8ta1 d2co8a1 d1x63a2 d2dj7a2 d2dj7a1 d2cu8a2 d2cu8a1  
d1g47a2 d1g47a1 d1j2oa1 d1wyha1 d2dloa1 d1wiga1 d1wiga2 d2cupa2  
d2cupa3 d1x68a1 d2d8ya2 d2d8ya1 d1m3va2 d1x62a1 d1x68a2 d1x61a1  
d1b8ta3 d1b8ta2 d2d8xa2 d2d8xa1 d1x4ka1 d1x4ka2 d2cuqa1 d1m3va1  
d2co8a2 d1j2oa2 d1x63a1 d2cura1 d2cura2 d1x62a2 d1s5ja2 d1qhta2  
d4dlea2 d1tgoa2 d3py8a2 d1q8ia2 d2py5a2 d1d5aa2 d2h0va\_ d1zx5a1  
d1qwra\_ d2ph1a2 d2ph1a1 d1fxza2 d1fxza1 d1lrha\_ d1uija1 g1dgw.1  
d2v09a\_ d1uika2 d1uika1 d1dgwa\_ d1ogpa1 d1ds6b\_ d1fstb\_ d1ex0a1  
d3us3a3 d3us3a1 d1bh9b\_ d1tafb\_ d1jfib\_ d1q9ca\_ d1h3ob\_ d2byka1  
d1n1ja\_ d4g92b\_ d1bh9a\_ d1jfia\_ d1h3oa\_ d2bykb1 d1n1jb\_ d2bjca1  
d2hsga1 d1qpza1 d1efaa1 d2ovga\_ d1sq8a\_ d1rzsa\_ d3kz3a\_ d3orca\_  
d2q49a2 d1hdgo2 d2g17a2 d2cvoa2 d2czca1 d3pwka2 d1obfo2 d1i32a2  
d1zyao2 d2pkqo2 d1b7go2 d2hjsa2 d1cf2o2 d1vkna2 d1nvm2 d1ux8a\_  
d1dlya\_ d4i0va\_ d2bkma\_ d1dlwa\_ d2bmma\_ d2msya\_ d2djoa1 d2r5za\_  
d1au7a1 d1f43a\_ d2lmda1 d1akhb\_ d1s7ea1 d3nara\_ d1zq3p1 d2craa1  
d1mija\_ d4uuta\_ d3a01a\_ d1x58a1 d3rkqa1 d3cmya1 d2cqxa1 d2da6a1  
d1e3oc1 d1fj1a\_ d1mh3a1 d1ig7a\_ d1x41a1 d1wh7a1 d1gt0c1 d2mw8a\_

d1lfup\_ d1x2ma1 d1b72a\_ d1wi3a1 d1jgga\_ d1wjha1 d1x2na1 d1mnmc\_  
d2cuea1 d3k2aa\_ d2hosa\_ d2jwta2 d1pufa\_ d1oactc1 d2hi3a\_ d1b8ia\_  
d4j19a\_ d3lnqa\_ d1wh5a1 d1fexa\_ d2cqra1 d1guua\_ d1ug2a1 d2cqqa1  
d2ajea1 d4a69c\_ d1h8ac1 d2crga1 d2iw5b1 d1xc5a1 d1ofcx1 d2cu7a1  
d1wgxa1 d2cjja1 d2ckxa1 d1gvda\_ d1tc3c\_ d1gdta1 d1u78a2 d6paxa1  
d6paxa2 d1k78a2 d1xg1a1 d1hlva2 d1iufa2 d1iufa1 d2iu5a1 d1zk8a1  
d2g7sa1 d2fd5a1 d2np5a1 d1z0xa1 d2id6a1 d2d6ya1 d2i10a1 d1vi0a1  
d2oi8a1 d3c07a1 d2ns7a1 d2fq4a1 d2yvea1 d1t33a1 d2o7ta1 d1rhta1  
d2np3b1 d2g7ga1 d2gena1 d2fbqa1 d2g7la1 d2gfna1 d2g3ba1 d2jj7a1  
d2hyja1 d1sgma1 d1ui5a1 d2hkua1 d2id3a1 d4jyka1 d1bl0a1 d1d5ya1  
d1d5ya2 d3lv8a\_ d1s3ga1 d1zaka1 d1s4qa\_ d3tvta2 d1uf9a\_ d1khta\_  
d1ckea\_ d1osna\_ d1p5zb\_ d4tmka\_ d3cm0a\_ d1tmka\_ d1jaga\_ d3h86a\_  
d1t0hb\_ d1nn5a\_ d2h92a\_ d3kb2a1 d2c95a1 d1yj5a2 d1kgda\_ d1ly1a\_  
d2ak3a1 d1vyva2 d1deka\_ d2grja1 d1p3ja1 d1y63a\_ d1e4ya1 d1s96a\_  
d3iija1 d1lvga\_ d1nksa\_ d1vyua2 d4e22a\_ d1qf9a\_ d1jjva\_ d1q3ta\_  
d1ki9a\_ d1lw7a2 d1teva\_ d1kjwa2 d1g3ma\_ d1j99a\_ d1t8ta1 d1nsta\_  
d1fmja\_ d1zrha\_ d1ls6a\_ d2a3ra\_ d2zptx\_ d3ckla\_ d1texa\_ d1q44a\_  
d2gwha\_ d1odfa\_ d1uj2a\_ d4gi7a\_ d2jeoa1 d1z0ja1 d3umra2 d3gj0a1  
d2gaoa1 d1yzga1 d1x3sa1 d1g7sa4 d1puja\_ d1udxa2 d1kk1a3 d2o52a\_  
d1jwyb\_ d1zcaa2 d1zcba2 d2fv8a1 d2cjwa\_ d3dz8a1 d1xzpa2 d1vg8a\_  
d4qxaa\_ d2ew1a1 d1x1ra1 d2bcgy\_ d3doea1 d3cona\_ d3rega\_ d3wyga\_  
d1upta\_ d2b6ha1 d1zd9a1 d1lnza2 d1r5ba3 d1n0ua2 d1r2qa\_ d2f91a1  
d2rhda\_ d3q3jb\_ d3q85a\_ d1efma1 d1r8qa\_ d2gf9a1 d2akab1 d1ek0a\_  
d1z08a1 d2gcoa1 d2dy1a2 d4g01b\_ d2cxxa1 d1svia\_ d3q72a\_ d1ni3a1  
d4ac9a4 d2erxa1 d2bmea\_ d1wxqa1 d2gf0a1 d4ldja1 d1zunb3 d1d5ca\_  
d4lv5b\_ d1efca3 d1kmqa\_ d2g6ba1 d3lrpa\_ d1tada2 d2y8ea\_ d4rd4a1  
d1z06a1 d2heia\_ d3a58b\_ d1u01a2 d1d2ea3 d1zj6a1 d2ocba\_ d3rwoa\_  
d1mr3f\_ d2e9sa1 d4u5xa1 d2iwra\_ d2fn4a1 d3bwdd\_ d2nzja1 d2atva1  
d2ksqa\_ d3l43a\_ d1mkya2 d1mkya1 d1wmsa\_ d1jnja3 d2rmka\_ d1f6ba\_  
d1f60a3 d1gota2 d1jala1 d2fh5b1 d1g16a\_ d2wblc\_ d1m7ba\_ d1wf3a1  
d1f5na2 d1t9ha2 d1z6xa1 d1z0aa1 d2fg5a1 d2a5ja1 d2bcjq2 d1ky3a\_  
d4y0va\_ d4lhwa\_ d2qmea1 d2atxa1 d1egaa1 d1ryha\_ d1moza\_ d1nrjb\_  
d2erya1 d3bfka\_ d1puia\_ d1fzqa\_ d3j3az1 d3t5ga\_ d1shza2 d3defa\_  
d2f7sa1 d3raba\_ d3tsoa\_ d3aq4a\_ d2a17a1 d3sfva1 d3bc1a\_ d2ncda\_  
d1sdma\_ d3h4sa1 d2heha\_ d2grya\_ g3kin.1 d1kk8a2 d1br2a2 d1goja\_  
d1f9va\_ d2mysa2 d1lkxa\_ d3t0qa\_ d4db1a1 d3gbja\_ d1ry6a\_ d1v8ka\_  
d1vava\_ d1uaia\_ d1jmxa2 d1jmxa1 d1pbya1 d1ig8a1 d1czan2 d1czan3  
d1ig8a2 d1czan4 d1bg3a4 d1bg3a3 d1bg3a2 d1bg3a1 d3h3no1 d3h3no2  
d3ezwa2 d1zc6a1 d1zbsa1 d1zbsa2 d1zc6a2 d2ch5a2 d2ch5a1 d1zxo2  
d1zxo2 d2d0oa3 d2d0oa2 d1nbwa3 d1hroa\_ d4gedb\_ d3zooa\_ d1mz4a\_  
d1gu2a\_ d1f1fa\_ d1dvva\_ d1c6ra\_ d1c75a\_ d1e29a\_ d1gdva\_ d1cnoa\_  
d1h32b\_ d2bh4x\_ d2aiua\_ d5cytr\_ d1jdl1a\_ d1i8oa\_ d2zboa\_ d3dmia\_  
d1ls9a\_ d1wvec\_ d2yk3a\_ d3ph2b\_ d1dw0a\_ d5aura\_ d1ql3a\_ d1qn2a\_  
d1f1ca\_ d4zzva\_ d2xspa\_ d1eg1a\_ d4v20a\_ d1ojja\_ d4ipma1 d1gpia\_

d4csia\_ d3pfza\_ d2yoka\_ d2nqya\_ dlh4ga\_ dlhixa\_ dloa2a\_ dlolra\_  
d3b7ma\_ d4h7ma1 d3wp3a\_ d2vgda\_ dligoa\_ d3zsea\_ d2nlra\_ d3wx5a\_  
dloa3a\_ d1pvxa\_ d1m4wa\_ d1f5ja\_ d1ks5a\_ d4ixla1 d1evsa\_ d1cnt1\_  
d1pvhb\_ d1z7ca\_ d1huwa\_ d1bgea\_ d1rhga\_ d1f6fa\_ d1f45b\_ d1i1rb\_  
dlaxia\_ dletea\_ d3tgxb\_ d1scfa\_ d2z3qa1 d3qb1a\_ dlhula\_ d1m48a\_  
d4nkqb\_ dleera\_ d1v7mv\_ d5e4ea\_ d2o27a\_ d3b5ka\_ d2psma1 d4zf7a\_  
d3uf5a\_ d4x51a\_ d1d9ca\_ d4ypgc1 d3oq3a\_ d1lqsl\_ d1n1fa\_ d1lau1a\_  
d1wu3i\_ d3bes1\_ d3ux9a\_ d3rbaa\_ d2qtra\_ d1nupa\_ d3l92a\_ d1f9aa\_  
d1qjca\_ d2h29a\_ d1vlha\_ d1od6a\_ d1lw7a1 d1mrza2 d4ruka\_ d2el7a\_  
d1iq0a2 d1irxa2 d1r6ta2 d1ivsa4 d2cyba\_ d1rqga2 d1j09a2 d2yxna\_  
d1f7ua2 d1h3fa1 d1ffya3 d2g36a1 d1nzja\_ d1jila\_ d1n3la\_ d1i6la\_  
d1pfva2 d1h3na3 d3n9ia\_ d3sz3a1 d1f00i3 d3sw2a\_ d1moxc\_ d1dx5i3  
d1edmb\_ d1autl2 d1autl1 d1nqlb\_ d1dval1 d1szba2 d1kigl\_ d2y5fl\_  
d1ijqa2 d1gk5a\_ d1g1sa2 d1nt0a3 d1xdtr\_ d1lmja2 d1lmja1 d1nzia2  
d2wphe\_ d1klil\_ d1pfxl2 d1pfxl1 d1p9ja\_ d1g1ta2 d1f7ea\_ d4yzub\_  
d1qx2a\_ d1ig5a\_ d2y5ia\_ d1qlsa\_ d1psra\_ d3n22a\_ d2egda\_ d4ggfc\_  
d2wcea\_ d2luca\_ d4aqia\_ d3nsia\_ d2lp3a\_ d1j55a\_ d1a4pa\_ d1nsha\_  
d1pvaa\_ d3fs7a\_ d2pvba\_ d1ttxa\_ d1rwy\_ d2kyfa\_ d1rk9a\_ d1a75a\_  
d1exra\_ d1tiza1 d1nyaa\_ d1g8ia\_ d1wdcc\_ d3fwba\_ d1ggza\_ d2o5ga\_  
d1ctaa\_ d1m45a\_ d3i5gc\_ d1s18a\_ d1fpwa\_ d2scpa\_ d2roaa\_ d4aqra\_  
d3pn7b\_ d1br1b\_ d2mysb\_ d1s6ca\_ d1bjfa\_ d2obha\_ d1jfka\_ d1jf0a\_  
d1qv0a\_ d1lkja\_ d2mlfc\_ d2m97a\_ d2d8na\_ d4by5a\_ d1jbaa\_ d4nqga\_  
d1wdcb\_ d2mysc\_ d1j7qa\_ d1s6ia\_ d1uhka2 d1r2ua\_ d1dtla\_ d3kf9a\_  
d3pn7c\_ d1qjta\_ d1fi6a\_ d1gjya\_ d1y1xa\_ d1hqva\_ d1dvia\_ d1qxp2  
d4usla\_ d1k94a\_ d1jfxa\_ d1wkya2 d1uuqa\_ d3wh9a\_ d4mlra\_ d1xyza\_  
d4xuya\_ d2je8a5 d4bf7a1 d3cuia\_ d1ur4a\_ d1qw9a2 d1lodza\_ d2vzsa5  
d1bqca\_ d2x2ya1 d1hjqa\_ d1qnra\_ d4y7ea1 d1vjza\_ d4k68a\_ d2v3ga\_  
d4hpga\_ d1nofa2 d1nq6a\_ d1h4pa\_ d1aq0a\_ d3ziza\_ d4bs0a\_ d1lecea\_  
d1h1na\_ d1ta3b\_ d1w91a2 d1ilwa\_ d1uhva2 d1us3a2 d1legza\_ d7a3ha\_  
d1tvna1 d3nyda1 d1ghsa\_ d2cyga1 d4xv0a\_ d2c8na2 d1w32a\_ d3emca\_  
d1v6ya1 d1foba\_ d2uwfa1 d2fgla\_ d3niya1 d2c0ha1 d1rh9a1 d1yq2a5  
d1szna2 d1fa2a\_ d1pama4 d5do8a1 d1ea9c3 d1hx0a2 d2fhfa5 d1qhoa4  
d1avaa2 d1m53a2 d4m8ua1 d2gjpa2 d1lwha2 d4howa1 d1ktba2 d1j0ha3  
d3vm5a1 d2x1ia\_ d1wzaa2 d1uasa2 d2diea1 d1mxga2 d1ht6a2 d1leswa\_  
d1iv8a2 d5cpsa\_ d1ud2a2 d1zjaa1 d3gbea1 d1kwga2 d1wdpa\_ d1gcya2  
d1g5aa2 d1hvxa2 d3dhpa2 d2bhua3 d4do4a1 d3qgva1 d1e43a2 d1g94a2  
d2d3na2 d1gjwa2 d1gvia3 d1x1na1 d1r7aa2 d1tz7a1 d4toqa\_ d1wb0a1  
d1w9pa1 d1eoka\_ d1litxa1 d1kfwa1 d1edqa2 d2gsja\_ d1hjxa1 d1jnda1  
d1vf8a1 d3wdpp1 d3wq5a\_ d1gnxa\_ d4gxpa\_ d4hz8a\_ d1e4mm\_ d3aiua\_  
d1wcca1 d1qvba\_ d3ahxa\_ d1v02a\_ d2dgaa\_ d1pbga\_ d1vffa1 d1qoxa\_  
d4ha4a\_ d1bvsa3 d1ixra2 d2w0pa\_ d2diaa1 d2e9ia2 d2e9ja1 d2dj4a1  
d2eeba1 d2diba1 d2dmba1 d2dmca1 d2d7oa1 d2ee6a1 d2d7pa1 d2eeaa1  
d2di8a1 d1wlha1 d2d7na1 d2nqca\_ d2d7ma1 d2dica1 d3cnka\_ d2k3ta1  
d2eeca1 d1qfha1 d1qfha2 d2bp3a1 d1v05a\_ d2ee9a1 d2eeda1 d2di9a1

d3syxa1 d2p8va\_ dlxoda1 dli7aa\_ dlevha\_ dlqc6a\_ dlegxa\_ d1xl4a1  
d3vsqa\_ d2gixa1 dlp7ba1 d1b9ra\_ dloffa\_ dlfrra\_ d3wcqa\_ d1e9ma\_  
d1l5pa\_ dlwria\_ dli7ha\_ d3av8a\_ dlczpa\_ dlrfka\_ d3plma1 d3b2ga\_  
d2bt6a2 dlwgqa1 dlv89a1 d2coda1 dlzc3b\_ dlwg7a1 d1u5ea1 dlv61a1  
d2coca1 d2ys1a1 dlv5pa1 dlntya2 dlwjma1 dlwila1 d1u29a\_ dlxx0a1  
dlunqa\_ d2zkmx3 dlfhoa\_ dlv88a1 d2adza1 dlx1fa1 dlp6sa\_ d2coaa1  
dlbtka\_ dlv5ma1 dlfaoa\_ d2x18a\_ dlodyna\_ dlx1ga1 d4kaxb\_ d2j59m1  
dlxcga2 dltxda2 d1u5da1 dl dbha2 dlw1ha\_ dlupqa\_ dlv5ua1 dlfoea2  
d2fjla1 d1eaza\_ d2dfka2 d2cofa1 dlkz7a2 dlh6ua1 d9ldta1 d2ewda3  
dlup7a1 d2dfda1 d1s6ya1 dlvjta1 d7mdha1 dlhyea1 d1t2da1 d1ojsa3  
dlldna1 dlhyha1 dlciva1 d2a92a1 d1ez4a1 d1i0za1 d1y6ja1 dlgv0a1  
dlur5a1 dl1lda1 dl obba1 dl npya1 d3t4ea2 d1o0sa1 d2hk9a2 d2egga2  
dlb26a1 dlbvua1 dl gq2a1 dl c1da1 dl leha1 dlgtma1 d1euza1 dl nvtal  
d3dona2 dl edza1 dl gpja2 dl vi2a1 dl p77a1 dl nyta1 dl b0aa1 dl v16a1  
dlv91a1 dltxga2 d3f47a1 d2pv7a2 dlxc2a3 d2ahra2 d4xiya1 d2f1ka2  
dlpgja2 d1i36a2 dl np3a2 dl1j8a4 dl teaa3 dl qmga2 d2i76a2 d2g5ca2  
dlwdka3 dl dlja2 d3cuma3 dl kola2 dl f8fa2 dl qora2 dljqba2 dl vj0a2  
dlcdoa2 dlgu7a2 dlxa0a2 d2dm6a2 dljvba2 dl rjwa2 dl llua2 dl h2ba2  
dltt7a2 dlpiwa2 dl o89a2 dl iz0a2 dl e3ja2 dl yb5a2 dl uufa2 dl vj1a2  
dl e3ia2 d3gpdg1 dlvc2a1 d2nvwa1 dl u8fo1 dl ydwa1 dlhdgo1 d2g17a1  
dlcf2o1 d2czca2 dl r0ka2 dl obfo1 d2cvoa1 dl ebfa1 dl h6da1 dl i32a1  
dlzh8a1 d2q49a1 dlqkia1 dlj5pa4 d3pzra1 dl xea1 dl vkoa1 dlvm6a3  
d3qvsa1 d2pkqo1 dl b7go1 dlgr0a1 dl p1ja1 dl lc0a1 dl j0xo1 d3pwka1  
d2hjsa1 dlzyao1 dlvkna1 dl tlta1 dl nvmbl d3sjua\_ d3ojfa1 dl xu9a1  
d2jjya1 dl n7ha\_ dl y1pa1 dl h5qa\_ dljtva\_ d4fs3a\_ d2bkaa1 dlgy8a\_  
d2c5aa1 dlulsa\_ dl ooea\_ d2b69a1 dl y5ma1 dl spxa\_ dl aela\_ dl bxka\_  
dl ydea1 dlgega\_ dl hdoa\_ dl o5ia\_ dl e6ua\_ dl snya1 d2rhca\_ d3zv4a\_  
d5ceja\_ d2d1ya1 d3w8ea\_ d2fmua1 dl x1ta\_ dl rpna\_ d3ay7a1 dl k2wa\_  
dl eq2a\_ d2hrba1 d3ruaa\_ d2ew8a1 d4hwka\_ dl xgka\_ d2bd0a1 dl yo6a1  
d2a35a1 d2ntva\_ dl v18a\_ dl hdca\_ d4bkua\_ d2ag5a1 d2q45a\_ dl nffa\_  
d4iy1a\_ dlzbqa1 dlkewa\_ dl ek6a\_ dlja9a\_ d2q46a2 dl iy8a\_ dl cyda\_  
d2ptga\_ dlhxha\_ dluzma1 d3lyla\_ d4m89a\_ d3wyea\_ d2b1la1 dlw6ua\_  
dl sb8a\_ d2q2va\_ d4nr0a\_ dl e6wa\_ d2gasa\_ d3oiga1 d2bgka1 dl mxha\_  
dl v10a1 dl rkxa\_ dl r6da\_ dl wmaa1 dl e7wa\_ d2c07a1 dl xkqa\_ d3tzha\_  
dl g0oa\_ d3lz6a\_ dl qyca\_ dl edoa\_ dl gz6a\_ dl oc2a\_ dl t2aa\_ dl zemal  
d2xoxa\_ dlz45a2 dl geea\_ dl p33a\_ d3lt0a\_ d4e6pa\_ d2wyua\_ dl db3a\_  
d4q9na\_ dl xhla\_ d4o1ma\_ dl fmca\_ d2uvda\_ d2gdza1 dl uaya\_ d2z1ma\_  
d2o23a2 d2fr1a2 d2fr1a1 dl qsga\_ dl qyda\_ d4zjua\_ d2a4ka1 dl yb1a\_  
dlwvga1 dl yxma1 d3f4ba\_ dl mg5a\_ dl xg5a1 d2gfoa1 dl vjva\_ d2ayna1  
d3nhea\_ d4ekfa\_ d2ckga\_ dl th0a\_ d2bkra\_ dl cmxa\_ dl xd3a\_ d3ifwa\_  
dl g0da4 d2f4ma1 dl x3za\_ dl mdwa\_ dl ziva1 dl zcma1 dl mixa2 dl e5wa2  
dl j19a2 dl isna2 d2a16b2 d3ioqa\_ dl fh0a\_ dl o0ea\_ dl khqa\_ dl m6da\_  
d2cb5a\_ dl cs8a\_ g8pch.1 dl s4va\_ d2pnsa\_ dl vsna1 dl mira\_ dl iwda\_  
d2oula\_ d7pcka\_ d3bwka\_ d3bcna\_ d2p86a\_ dl pvja\_ dl pcia\_ dl gece\_

d1deua\_ d4bs6a\_ d1xkga1 d1cqda\_ d1jqpa2 d2c0ya\_ d2bdza\_ d3p5ua\_  
d1zoya1 d1qo8a2 d1d4ca2 d1jnra2 d1kf6a2 d2jk6a2 d2jk6a1 d1fecal  
d1fecal d1lpfa1 d1lpfa2 d1xhca1 d1xhca2 d1dsla2 d1dsla1 d1gera2  
d1m6ia2 d1onfa1 d3lada2 d3lada1 d1w4xa1 d1w4xa2 d1gesa2 d1mo9a1  
d1xdia1 d1fl2a2 d1fl2a1 d1fcda1 d1fcda2 d1h6va2 d1h6va1 d1mo9a2  
d1gv4a2 d1gv4a1 d2gv8a2 d2gv8a1 d1aoga1 d1aoga2 d1hyua1 d1ebda1  
d1ebda2 d3dk9a1 d1qlra2 d1qlra1 d1gesa1 d1zbfal d2z1ha\_ d2etja1  
d3qioa1 d1j11a\_ d2e41a\_ d1j12a\_ d21sna1 d1io2a\_ d1uaxa\_ d2yv0x\_  
d1mu2a1 d1lekea\_ d1i39a\_ d1ep0a\_ d2pa7a1 d1wlta1 d1nxma\_ d2c0za1  
d1pn0a1 d1reoa1 d1ju2a1 d2f5va1 d3c96a1 d2gmha1 d1pj5a2 d1gpea1  
d1o5wa1 d1n4wa1 d1k0ia1 d2dw4a2 d2ivda1 d2voua1 d1kdga1 d1s5ja1  
d2hbja2 d2igia\_ d1wlja\_ d1qhta1 d4dleal d1tgoa1 d2f96a1 d3tr8a1  
d3mxma\_ d1q8ia1 d1y97a1 d1w0ha\_ d1kfsa1 d2py5a1 d1d5aa1 d1yt3a3  
d2guia\_ d3mwpal d4kb1a\_ d1id1a\_ d2hmta\_ d1lssa\_ d1iv0a\_ d1nu0a\_  
g1apy.1 d3ljqa\_ g1k2x.1 d2csua1 d3q9ub\_ d2yv1a1 d3q9na\_ d2d59a\_  
d1oi7a1 d2yv2a1 d1leuca1 d1y81a1 d3nvva1 d1krha3 d2h88b1 d1n62a2  
d1t3qa2 d1kf6b2 d1zoyb1 d1jq4a\_ d1ffva2 d1dgja2 d1rm6c2 d1r7ha\_  
d1faaa\_ d1wika1 d1xfla\_ d1ttza1 d2f51a1 d1ti3a\_ d1nhoa\_ d1sena\_  
d2i4aa\_ d1ep7a\_ d1zmaa1 d3lefa1 d3diea1 d2yana1 d1z6na1 d1oaza\_  
d3zywa1 d4aj8a\_ d1nm3a1 d4fiwa\_ d1wmja\_ d4hs1a1 d1liloa\_ d1xwaa1  
d1wjka1 d2vm1a\_ d1fb6a\_ d1gh2a\_ d1h75a\_ d1nw2a\_ d1kx5b\_ d3a6na\_  
d4m6ba2 d2nqbd\_ d3wkjd\_ d2yfwe\_ d4h9na\_ d5bnxa\_ d1kx5c\_ d3r45a\_  
d1eqzb\_ d4jjnb\_ d1f66c\_ d1eqza\_ d4wnnb\_ d1kx5a\_ d1u35c1 d1id3a\_  
d2nqbc\_ d1kx5d\_ d1ku5a\_ d1f1ea\_ d2b5ea2 d2b5ea3 d2b5ea1 d2b5ea4  
d2kp1a1 d2kp2a1 d1hyua3 d1hyua4 d1j08a1 d1pd212 d1nhyua2 d2a2ra2  
d1k0dd2 d1f2ea2 d1gsua2 d2fhea2 d2pvqa1 d1tw9a2 d1loyja2 d1e6ba2  
d1k0ma2 d3ik7a1 d4is0a1 d1r5aa2 d1jlva2 d1m0ua2 d3gtub2 d1z9ha2  
d1okta2 d1axda2 d2gsra2 d1tu7a2 d1k3ya2 d1zgma1 d1b48a2 d1gnwa2  
d1gwca2 d2gsta2 d1glqa2 d1oe8a2 d1pn9a2 d1v2aa2 d1fw1a2 d1duga2  
d1y14b1 d2nn6i1 d1i941\_ d2zjra2 d1smxa\_ d2qamc2 d1hh2p1 d2r7da1  
d1r12a2 d1wfqa1 d3bzka4 d1x6oa2 d3a0ja\_ d2j01d2 d2ja9a1 d4q15a\_  
d1hr0w\_ d1luza\_ d2n3sa\_ d2vnud1 d1h95a\_ d1go3e1 d2nn6h1 d1ne3a\_  
d2mo1a\_ d1iz6a2 d1jjga\_ d1e3pa2 d2ix0a3 d2ix0a2 d2lxja\_ d1ueba3  
d1ueba2 d2z0sa1 d1u01a1 d2ix0a1 d2eifa2 d2je6i1 d3i2za1 d2c35b1  
d2ahob2 d1t9ha1 d3i4oa\_ d2qall1 d1jt8a\_ d2nn6g1 d1g6pa\_ d3cama\_  
d1i94q\_ d1c9oa\_ d1d7qa\_ d2ba0a1 d2vnud2 d2vnud3 d1khia2 d2qalq1  
d1wi5a1 d1xtda2 d1ny4a\_ d1novc\_ d2bbvc\_ d3h1jd1 d1qqya\_ d1gd6a\_  
d1livma\_ d2gv0a\_ d1iiza\_ d2z2fa\_ d1j8xa\_ d1ghla\_ d1b9oa\_ d1g4ma1  
d3w3ea\_ d4tx7a\_ d3cq1a\_ d4msta\_ d3iwra\_ d2z37a\_ d4dyga\_ d2pjsa1  
d1klla\_ d2i7ra1 d1ecsa\_ d1xqaa1 d5cj3a1 d1jifa\_ d2p7oa\_ d1r9ca\_  
d1nkia\_ d1mpya2 d1kw3b2 d1kw3b1 d4ghga1 d1tfza1 d3isqa1 d3isqa2  
d1sqia1 d1sqia2 d1lkda2 d1lkda1 d1mpya1 d1cjxa2 d1cjxa1 d1sp9b2  
d1t47a1 d1t47a2 d1sp8a1 d1sp8a2 d1flua1 d2bema\_ d1pama1 d1ea9c1  
d1qhoa1 d2fhfa2 d2fhfa1 d1k3ia1 d1j0ha1 d1cxla1 d2bhua1 d1ledqa1

d1f1sa2 d1lut9a2 d1gvia1 d1txka1 d4iuuaa3 d4bvva\_ d5hpga\_ d3k65a\_  
d1ki0a3 d1ki0a2 d1ki0a1 d1a0ha1 d1pmla\_ d3sp8a3 d2feba1 d1qsta\_  
d2beia1 d4m3sa\_ d1u6ma1 d1ygha\_ d1yk3a1 d3dr6a\_ d1xmta\_ d1z4ea1  
d2ge3a1 d1bo4a\_ d2fiaa1 d2jdca1 d1y9wa1 d3to7a\_ d1wwza1 d2f14a1  
d2ozua1 d2b5ga\_ d2cy2a1 d2p0wa\_ d1cm0a\_ d4pswa\_ d1yrea1 d1yr0a1  
d1m4ia\_ d2gana1 d1yvka1 d1ghea\_ d2g3aa1 d1y7ra1 d2euia1 d1q2ya\_  
d2fsra1 d1xeba\_ d2ae6a1 d1cjwa\_ d1qsma\_ d2aj6a1 d1y9ka1 d1i12a\_  
d1vkca\_ d2atra1 d1n71a\_ d2d4pa1 d2fiwa1 d2fe7a1 d1tiqa1 d2ou2a\_  
d1yx0a1 d2fcka1 d1p0ha\_ d2j8ma\_ d2pq8a\_ d1z4ra1 d1s3za1 d1ufha\_  
d1c4qa\_ d1prtc1 d2wv6d\_ d1prtf\_ d1l1trd\_ d4l63b1 d1r4pb\_ d1t10f\_  
d2bosa\_ d1prtb1 d3chbd\_ d1xvqa1 d1pn0a2 d3hy2a\_ d2cvba1 d1o8xa\_  
d1lu4a\_ d1we0a1 d2bmxal d2a4va1 d1psqa\_ d1xiya1 d1n8ja\_ d1zofa1  
d2ggta\_ d3tjja\_ d4je1a1 d1o73a\_ d3s9fa\_ d2zcta\_ d1qmva\_ d1jfua\_  
d2b1ka\_ d5dvba1 d2b5xa1 d2v2ga\_ d1st9a\_ d3tb2a\_ d41lra\_ d4fh8a1  
d1e2ya\_ d1knga\_ d2h30a\_ d1i5ga\_ d2z9sa\_ d2f8aa1 d1tp9a1 d2b7ka\_  
d1nm3a2 d3hvva\_ d2wfca1 d4kcea\_ d1xvwa1 d4gqca1 d3qpma\_ d4k1fa\_  
d1zzoa1 d1gp1a\_ d1prxa\_ d2m5ta\_ d1cqqa\_ d1wqsa\_ d5bpea\_ d2ipha\_  
d1lvoa\_ d2bhga1 d3tnta\_ d3sjia\_ d3d23a1 d2fyqa\_ d3tloa\_ d3zvea1  
d2hrva\_ d3q3ya1 d4asha1 d1etha2 d1w52x1 d2ppla1 d1hpla2 d1lpbb2  
d2oxea1 d1bu8a2 d1rp1a2 d1ys1x\_ d4hs9a\_ d1ispa\_ d1ku0a\_ d3qmma\_  
d1cr6a2 d1j1ia\_ d2rhwa\_ d2ftba\_ d1pmpa\_ d2rcqa1 d1fdqa\_ d4lkpa\_  
d1sa8a\_ d1vyfa\_ d1lpja\_ d3vg7a1 d4azqa1 d1o8va\_ d5bvqa\_ d1p6pa\_  
d2qo4a\_ d1opba\_ d1yiva1 d1o1va\_ d4bvma1 d4tkba\_ d4i3ba\_ d1bwya\_  
d1ftpa\_ d4gkca\_ d1cbia\_ d3p6da1 d1kqwa\_ d2a0aa1 d2ddfa\_ d3zxha\_  
d1cgl1a\_ d1rm8a\_ d1eaka2 d1hy7a\_ d2jsda\_ d1cxva\_ d1hv5a\_ d1i76a\_  
d3p0ya1 d1igra1 d1igra2 d1n8yc2 d1n8yc1 d1m6ba2 d1m6ba1 d1dzka\_  
d4t1ja\_ d2a2ua\_ d4wfva\_ d3t1da\_ d4iaxa\_ d3zq3a\_ d2nnda\_ d1i4ua\_  
d1kxoa\_ d1bbpa\_ d1kt7a\_ d1exsa\_ d3s26a1 d1lf7a\_ d1qfta\_ d4gh7a\_  
d1z24a1 d1qabe\_ d1xkia\_ d1ew3a\_ d3bx7a\_ d4iawa1 d1n0sa\_ d1gkab\_  
d3kzaa\_ d2k23a\_ d2l9ca1 d2joza1 d1gm6a\_ d3kffa\_ d3saoa1 d1e5pa\_  
d1yupa1 d1iiua\_ d1jgta2 d1ofda3 d1ea0a3 d1ecfa2 d1ct9a2 d1ao0a2  
d1te5a\_ d1h6ta2 d1h6ua2 d1lmra\_ d1cixa\_ d1y29a\_ d1v7fa\_ d2jtba\_  
d1d1ha\_ d1g9pa\_ d1lupa\_ d1qk7a\_ d2a2va\_ d1niya\_ d1i25a\_ d1hvwa\_  
d2mpqa\_ d1ie6a\_ d1kqha\_ d1la4a\_ d2mxa1 d1d10a\_ d1koza\_ d1qk6a\_  
d1emxa\_ d1lqra\_ d1c6wa\_ d1rmka\_ d1ixta\_ d1eyoa\_ d1cna\_ d1g1pa\_  
d1f3ka\_ d1fyga\_ d1rypd\_ d1irua\_ d1rypc\_ d3unfk\_ d1rypa\_ d1j2pa\_  
d1irui\_ d1j2qh\_ d3unfh\_ d1m4ya\_ d1rypb\_ d1irul\_ d1irug\_ d1iru2\_  
d1q5rh\_ d1rypg\_ d1g3ka\_ d1iruf\_ d1q5qa\_ d1e94a\_ d1irub\_ d1ryph\_  
d3ty6a\_ d1iruj\_ d1iruk\_ d1rype\_ d1irud\_ d1irue\_ d3mi01\_ d1rypf\_  
d1iruh\_ d2z3ba\_ d1iruc\_ d3mka2\_ d1iru1\_ g1gk9.1 g1cp9.1 g1e3a.1  
d1mqta\_ d1d4m3\_ d1fmd3\_ d2mev1\_ g1aym.1 d1ev13\_ d4q4w1\_ d1r1a3\_  
d2x5ia\_ d1rhi1\_ g1r1a.1 g1d4m.1 g1rhi.1 d1b35b\_ d1loopa\_ d1tme1\_  
d4iv1a\_ g1pvc.1 g1fpn.1 d1fpn1\_ d4gb31\_ d1d4m1\_ d1fmd1\_ d1ev11\_  
d2wzr3\_ g1cov.1 d1qqp3\_ g1fmd.1 d2x5ic\_ d1rhi3\_ g1loop.1 d1hxs1\_



d1fpn3\_ d1bev1\_ g2mev.1 d1eah3\_ d1aym1\_ d1pvc3\_ d1qqp1\_ d1zba3\_  
d1h8ta\_ d3vbhc\_ g1b35.1 g1bev.1 d1hxs3\_ g1ev1.1 d1bev3\_ g1tmf.1  
d1tmf1\_ d1b35a\_ d2mev3\_ g1eah.1 g1h8t.1 d1eah1\_ d4q4w3\_ d1r1a1\_  
d1aym3\_ d1pvc1\_ d1zba1\_ d1h8tc\_ d1loopc\_ d1tme3\_ g1qqp.1 d4iv1c\_  
g1tme.1 d1p8ba\_ d4w9ta\_ d1jvna1 d4x2ra1 d1ka9f\_ d1qo2a\_ d4axka1  
d1h5ya\_ d4u28a\_ d2y88a\_ d4wd0a\_ d1vzwa1 d1eixa\_ d3exra\_ d2ffca1  
d2fdsa1 d3n3ma1 d2czda\_ d1q6oa\_ d2yyua\_ d1vqta1 d1dbta\_ d3ldva1  
d2flia1 d1h1ya\_ d1tqja\_ d1tqxa\_ d4lt9a1 d3tc7a1 d3hoja\_ d1i4na\_  
d3vnda\_ d3n18a1 d1geqa\_ d3naval d1v5xa\_ d4a2ra1 d3tc6a1 d1ujpa\_  
d4ijba\_ d1xcfa\_ d1vc4a\_ d1rd5a\_ d3b5va\_ d2r80b\_ d1cqxa1 d1cg5a\_  
d1gcvb\_ d3boma\_ d2h8fb\_ d2raoa\_ d3bj1a\_ d4hrrb\_ d2r50a\_ d3d1kb\_  
d2aalb1 d3zhwa\_ d3hf4b\_ d3gdja\_ d1jebb\_ d3bj1b\_ d1x9fb\_ d1wmub\_  
d1gcva\_ d3bcqb\_ d3d4xb\_ d1gvha1 d2dc3a\_ d3hf4a\_ d4yu3a\_ d3k8ba\_  
d1qpwb\_ d2r80a\_ d3bcqa\_ d1v4wa\_ d3wtgb\_ d1j17a\_ d4esaa\_ d1a9we\_  
d3d1ab\_ d1fsla\_ d4h21a\_ d1v4wb\_ d1mwca\_ d1vhba\_ d1jeba\_ d1spgb\_  
d1h97a\_ d1q1fa\_ d1tu9a1 d3d1aa\_ d1hdsb\_ d3hyub\_ d2zffb\_ d3fs4a\_  
d1oj6a\_ d1shrb\_ d4h21b\_ d4yu3b\_ d1spga\_ d3hrwa\_ d3qqra\_ d3at5a\_  
d4wchd\_ d3hyua\_ d1cg5b\_ d1uc3a\_ d1hbra\_ d2raob\_ d1outb\_ d4esab\_  
d3gdjb\_ d3qqqa\_ d1x9fc\_ d3vrfa\_ d1litha\_ d3mkba\_ d3d4xa\_ d3mjpa\_  
d1j16a\_ d3fh9a\_ d1outa\_ d2dc3b\_ d1lit2a\_ d3eoka\_ d3g46a\_ d1qpwa\_  
d3vrfb\_ d1ch4a\_ d1x9fd\_ d1hdsa\_ d2zfb\_ d3mkbb\_ d1or4a\_ d3wtga\_  
d1a4fa\_ d3fh9b\_ d3bomb\_ d3cy5a\_ d3at5b\_ d1x9fa\_ d2oifa\_ d4lmbx\_  
d1cpcb\_ d3v57a\_ d1kn1a\_ d1cpca\_ d4f0ta\_ d2vjha\_ d4po5b\_ d1eyxa\_  
d1alla\_ d4f0tb\_ d1b33b\_ d1b8db\_ d4h0mb\_ d1b33a\_ d2vjhb\_ d4lmb6\_  
d2vmlb\_ d2vjta\_ d3dbja\_ d2vmla\_ d2vjtb\_ d4f0ub\_ d1f99b\_ d4rmpa1  
d1liaa\_ d1eyxb\_ d2uulb\_ d4lmsb\_ d4f0ua\_ d2bv8a\_ d1f99a\_ d2bv8b\_  
d2c71b\_ d3dbjb\_ d4rmpb1 d1b8da\_ d4h0ma\_ d3v57b\_ d1kn1b\_ d1liab\_  
d2uula\_ d2j96a\_ d3nqyb\_ d4gera\_ d1bqba\_ d1mtza\_ d1hlga\_ d2xqfa\_  
d1ea5a\_ d1f6wa\_ d1dx4a\_ d1k4ya\_ d4qwwa\_ d2ha2a\_ d1r88a\_ d1sfra\_  
d4qeka\_ d1jmx4 d1pbya3 d1pbya4 d1pv8a\_ d1w5qa\_ d2c1ha\_ d1ohla\_  
d1l6sa\_ d1dosa\_ d1gvfa\_ d3qm3a1 d2fjka\_ d1f74a\_ d3l21a\_ d2e1da\_  
d1to3a1 d1w3ia\_ d1sfla\_ d1n7ka\_ d1vcva1 d4imea\_ d1wa3a\_ d2ocza1  
d1f2ja\_ d3m16a\_ d2yxga\_ d1ub3a\_ d3a5fa\_ d1fbaa\_ d1l6wa\_ d1xfba1  
d1wx0a1 d1vpxa1 d1ojxa\_ d1mxsa\_ d2a4aa1 d1xkya1 d3cq0a1 d3s1xa\_  
d1f05a\_ d1fdja\_ d3cpra1 d4d2ja\_ d1e88a1 d1l6ja5 d1l6ja4 d1eaka4  
d1eaka3 d1h8pa2 d1h8pa1 d3rp2a\_ glucy.1 d1fuja\_ d2zchp\_ d3w94a\_  
d1si5h\_ d1lo6a\_ g2pka.1 d1cgha\_ d1kigh\_ d1a5ia\_ d3s9ba\_ d1hj8a\_  
d1ao5a\_ d2anya\_ d1q3xa1 d1gvza\_ d4gsoa\_ d2f91a1 d1iaua\_ d1gdna\_  
d1eufo\_ g1fiw.1 d1eq9a\_ d4nfea\_ d2rdla\_ d1spja\_ d1elva1 d1a7sa\_  
d1lekbb\_ d1pfxc\_ d1yc0a\_ d2aiqa\_ g1fiz.1 d1fi8a\_ d4k60a\_ d4dgja\_  
d1mzaa\_ d1op0a\_ d3tjva\_ d1pytd\_ d1sgfg\_ g1gg6.1 d2eeka\_ g1rtf.1  
d1a0ja\_ d3g01a\_ d1pytc\_ d4e7na\_ d1ddja\_ d1z8ga1 d2hlca\_ d1npma\_  
d1brup\_ g1jou.1 d1sgfa\_ d1autc\_ g2hnt.1 g1kdq.1 d1orfa\_ d3s69a\_  
d4crga\_ d1fxya\_ d1bqya\_ d1ra6a\_ d1muka\_ d3gsza\_ d1khva\_ d1te9a\_

d2xwha\_ d3uqsa\_ d3hkwa\_ d3n6ma\_ d2cjqa\_ d2xyma\_ dlteba\_ dlte8a\_  
d1s48a\_ d1u09a1 d4wfxa\_ d3tyqa\_ d2pgga1 d1jx4a2 d3gv5b1 d1t94a2  
d3bq0a2 d3lgia\_ d3i77a\_ d2z9ia2 d4nsva\_ d1lcya2 d4jcn\_ d1agja\_  
d1os8a\_ d1hpga\_ d1p3ca\_ d1l1ja\_ d1qtfa\_ d1e69a\_ d1mv5a\_ d3g60a4  
d1ewqa2 d1ji0a\_ d1qhla\_ d1v43a3 d2wmfa1 d1vpla\_ d1g2912 d4a82a2  
g1f2t.1 d2d62a1 d3tuic1 d2bbsa1 d3g60a3 d2ixea\_ d1g6ha\_ d1sgwa1  
d2qi9c\_ d3rlfa1 d3b60a1 d3d31a2 d2pzea1 g1xew.1 d1jj7a\_ d1oxxk2  
d2onka1 d1wlwa\_ d1iwea\_ d1qf5a\_ d1vmaa2 d1nija1 d1np6a\_ d2p67a1  
d3ihla\_ d1okkd2 d1l1s1a2 d1s1ma2 d1liona\_ d2v40a\_ d1dj3a\_ d3hida\_  
d2vo1a1 d2g0ta1 d1vcoa2 d1j8mf2 d1g3qa\_ d1xjca\_ d1p9ba\_ d1qzxa3  
d1ihua2 d2qm8a\_ d1dj2a\_ d4ioja\_ d1cp2a\_ d1yrba2 d1hyqa\_ d3gqba2  
d1skye3 d1xp8a1 d1tf7a2 d1tf7a1 d1ye8a1 d1skyb3 d2qe7d2 d4blta\_  
d4huta\_ d3ldaa2 d4hyya\_ d2i3ba1 d1cr1a\_ d3j9tb2 d3ntua2 d1vdza1  
d2z43a\_ d1e9ra\_ d1nlfa\_ d3ziaa2 d1n0wa\_ d1g6oa\_ d3ziad2 d3j9ta2  
d1pzna2 d3gqbb2 d2i49a\_ d1nnfa\_ d1xvxa\_ d1ursa\_ d1h3da1 d1iuda\_  
d4mlva1 d1twya\_ d3e13x\_ d2nxoa1 d4pfua\_ d3ttma\_ d1elja\_ d2qmwal  
d1us5a\_ d1y3na1 d1jeta\_ d1uqwa\_ d4f19a1 d2esna2 d3thia\_ d3fasa1  
d2uyeb\_ d2xwva1 d1r9la\_ d2fyia1 d1pb7a\_ d2ozza1 d1sw5a\_ d1nh8a1  
d1vr5a1 d2g29a\_ d1xs5a\_ d3lswa\_ d2z23a\_ d3w9va\_ d3tcha\_ d1q35a\_  
d1z7me1 d3q27a\_ d1p99a\_ d1ve4a1 d2i6ea1 d4mcoa1 d4n8ya\_ d1zbma1  
d1hsla\_ d1ixca2 d1j1na\_ d1xvya\_ d1y9ua\_ d2z22a1 d1xoca1 d4oera\_  
d1wdna\_ d5f1qa1 d1xt8a1 d1i6aa\_ d4gwoa\_ d4igta1 d1pc3a\_ d4mmpa1  
d1o63a\_ d2cz1a1 d2onsa2 d4mija1 d1eh3a\_ d3skpa\_ d1dtza1 d1dtza2  
d1ieja\_ d1jnfa2 d1ce2a1 d1jnfa1 d1b1xa2 d1b1xa1 d1jw1a1 d1jw1a2  
d1h76a1 d1h76a2 d1c4oa1 d2p6ra3 d2p6ra4 d1oywa2 d1oywa3 d1wrba1  
d1w36b2 d1w36b1 d1c4oa2 d3bora\_ d1t6na\_ d2eyqa5 d2eyqa3 d2eyqa2  
d2zu6a2 d1veca\_ d1uaaa1 d1w36d1 d2g9na1 d1z3ix2 d2rb4a\_ d1hv8a1  
d1hv8a2 d1t5ia\_ d1w36c2 d2j0sa2 d2j0sa1 d1fuka\_ d3hjha1 d1z5za1  
d1qdea\_ d1z63a1 d1s2ma2 d1s2ma1 d1wp9a1 d1wp9a2 d1gm5a3 d1gm5a4  
d3dina4 d3dina3 d1q0ua\_ d1w36c1 d1z3ix1 d1nkta4 d1uaaa2 d1w36d2  
g1qhh.1 d2fwra2 d2fwra1 d2fkza\_ d1zuja1 d1s3qa1 d2fjca1 d1z6om1  
d1veia\_ d4dyya\_ d1jiga\_ d3gvya\_ d2pyba\_ d4cy9a1 d3bvfa1 d1r03a\_  
d2cf7a\_ d1nf4a\_ d1zs3a1 d4iwka\_ d3ka8a\_ d3np0x\_ d1n1qa\_ d1lb3a\_  
d4e6ka\_ d1z6oa1 d2fzfa1 d4dyua\_ d3ge4a\_ d4am4a\_ d2z6ma\_ d1ji5a\_  
d1vlga\_ d1lkoa1 d1krqa\_ d3qz3a\_ d1o9ra\_ d2ffxj\_ d1euma\_ d1yv1a1  
d2v2pa\_ d1j30a\_ d4di0a\_ d1dpsa\_ d1oewa\_ d2qzxa\_ d2asia\_ d1psoe\_  
d1miqa\_ d1smra\_ d2h6ta\_ d1pfza\_ d1izda\_ d3hd8a\_ d1j71a\_ d1dpja\_  
d4aa9a\_ d1t6ex\_ g1lya.1 g1htr.1 d1qdma2 d1bxoa\_ d1wkra\_ d1tzsa\_  
d1libqa\_ d2qzwa\_ d1ex4a2 d1c6va\_ d1bdqa\_ d3ggta\_ d3ixoa\_ d1mrxa\_  
d2haha\_ d1tw7a\_ d4njsa\_ d1sgua\_ d2p3da\_ d1nsoa\_ d3d3ta\_ d2rkfa\_  
d1c6ya\_ d2rspa\_ d3ogpa\_ d3ekwa\_ d2o4na\_ d2j9ja\_ d1baia\_ d3ggua\_  
d3lzua\_ d4npua\_ d4j55a\_ d2r8na\_ d2fxda\_ d2p3ca\_ d4dqa\_ d3ttpa\_  
d3t3ca\_ d2p3aa\_ d2hc0a\_ d2fdda\_ d3mwsa\_ d1k8rb\_ d1wgra1 d1ef5a\_  
d1wfyal d1e8ya3 d1wgya1 d1l1fda\_ d2cs4a1 d1wxma1 d2byea1 d3kh0a1

d2byfa1 d1wxaa1 d1e7ua3 d1h4ra3 d4yl8a1 d2a16a3 d1wgda1 d1wgga1  
d4q5eb\_ d1wjna1 d1se9a\_ d3n3kb\_ d1wz0a1 d1we6a1 d2m0xa\_ d2gbka\_  
d3rt3b1 d1wh3a1 d1sifa\_ d2ekek2 d4ii2b1 d4hk2a1 d1c3ta\_ d1m94a\_  
d1wgha1 d1ttna1 d1j8ca\_ d1wx8a1 d3v6cb1 d2ma9b\_ d4i61b1 d1bt0a\_  
d2jvca1 d2k1fa\_ d1wxva1 d1wf9a1 d1t0ya\_ d2io0b2 d1x1ma1 d2gbma\_  
d1zw7a1 d2m17a\_ d1ud7a\_ d1we7a1 d2lwpa\_ d2gbja\_ d1wjua1 d1v6ea1  
d1v86a1 d4eewa\_ d1wiaa1 d4icva\_ d4gu2a\_ d1wx7a1 d1wy8a1 d4hjk1a1  
d2fazaa1 d1v5oa1 d1g66a\_ d1qoza\_ d5ajha1 d1iyka2 d1rxta1 d1iica2  
d1iica1 d1dszb\_ d1a6ya\_ d3cbba\_ d1ynwa1 d1r4ia\_ d1hcqa\_ d2hana\_  
d2hanb\_ d2enva1 d1kb4b\_ d2n11b\_ d1lo1a\_ d1cita\_ d1lum8a\_ d1lixza\_  
d1qvra2 d1qvra3 d1qzma\_ d1sxjc2 d1jr3d2 d2p65a\_ d1l8qa2 d1g8pa\_  
d3hu3a3 d1sxjd2 d1njfa\_ d1in4a2 d1sxja2 d1tuea1 d2ce7a2 d1w5sa2  
d1sxjb2 d1d2na\_ d1ny5a2 d1ofha\_ d2gnoa2 d2a5yb3 d1fnna2 d1u0ja1  
d1lv7a\_ d1iqpa2 d2fnna2 d1ixsb2 d4gita\_ d1sxje2 d1g41a\_ d1svpa\_  
d1mbma\_ d3su6a1 d4agka\_ d1vcpa\_ d1q31a\_ g1n11.1 d3e90b\_ d1ep5a\_  
d3u1jb\_ d2l1j7a\_ d2m8bb1 d2kyqa\_ d3psma\_ d1jkza\_ d1jxca\_ d2g11a\_  
d1ugla\_ d4uj0a\_ d2k4ua\_ d1hp2a\_ d2lu9a\_ d1baha\_ d2meoa1 d1wm7a\_  
d1hlya\_ d1n8ma\_ d1j1za\_ d1wpda\_ d1c55a\_ d1pvza\_ d1wt7a\_ d1rjia\_  
d1wz5a\_ d1m2sa\_ d1pjva\_ d1c49a\_ d1qkya\_ d2ktca1 d1wmta\_ d1j5ja\_  
d1r1ga\_ d1t0za\_ d2i61a\_ d1t1ta\_ d1sn4a\_ d1kv0a\_ d2l1kba\_ d1npia\_  
d1wwna\_ d1pe4a\_ d2kbka\_ d2li7a\_ d2kbha\_ d1dq7a\_ d1sega\_ d1omya\_  
d1zywa1 d1jzaa\_ d1n9wa1 d1bbua1 d1e1oa1 d1c0aa1 d1l0wa1 d3a74a1  
d1eova1 d1t61c1 d1iyjb4 d1iyjb5 d1iyjb3 d1o7ia\_ d4ipca1 d1x3ea\_  
d4apva\_ d1jb7a1 d1jb7a2 d1jb7a3 d3kdfa\_ d1ue1b\_ d1wjja1 d3eiva\_  
d1xjva2 d1xjva1 d2ccza2 d1se8a\_ d1l1loc\_ d1jb7b\_ d1qvca\_ d3ulla\_  
d1qzga\_ d1miua4 d1miua5 d1miua3 d3g48a1 d1gd7a\_ d1mkha\_ d1jjcb3  
d1pyba\_ d3ubub\_ d1legia\_ d1qo3c\_ d1v7pa\_ d1tdqb\_ d3ubua\_ d1c3ab\_  
d1h8ua\_ d3bx4b\_ d1t8ca1 d1sb2a1 d1qdda\_ d2ziba1 d3cada\_ d1byfa\_  
d1j34b\_ d1jwia\_ d1jzna\_ d1c3aa\_ d1wmza\_ d3bdwb\_ d1hq8a\_ d1fifa1  
d1dv8a\_ d3hupa\_ d1wk1a1 d1umra\_ d2afpa\_ d3bx4a\_ d1gz2a\_ d1sl6a\_  
d1v7pb\_ d3g8ka\_ d1lixa\_ d1j34a\_ d1jwib\_ d1g1sa1 d1y17a1 d1ja3a\_  
d1fvub\_ d3bdwa\_ d1sb2b1 d1fvua\_ d1umrc\_ d1oz7a\_ d4m17a\_ d3cfwa1  
d1ypqa1 d1g1ta1 d3fd4a\_ d3l9jc\_ d4dn8a1 d1v41b\_ d1rdl1\_ d2msba\_  
d2a1ka\_ d1je5a\_ d1rpma\_ d2shpa1 d1yfoa\_ d1l8ka\_ d2ooqa1 d1g4us2  
d1p15a\_ d1lara2 d1lara1 d1wcha\_ d2fh7a2 d2fh7a1 d1ohea1 d2f4da\_  
d1rxda\_ d2hxpa\_ d1xria\_ d1d5ra2 d1fpza\_ d3ezza\_ d4y2ea\_ d1i9sa\_  
d3azya\_ d3wvja\_ d1upsa1 d1ajoa\_ d2hyka\_ d1ajka\_ d2vy0a\_ d1o4ya\_  
d3o5sa\_ d3d6ea\_ d3atga\_ d1dypa\_ d1umza\_ d3i4ia\_ g1qmo.1 g1len.1  
d3zyra\_ d1fnya\_ g2ltn.1 d1avba\_ d3usua\_ d1dhkb\_ d1f9ka\_ d1lukga\_  
d1g8wa\_ d1g9fa\_ d1wbfa\_ d3wcsa\_ d1g7ya\_ g1loe.1 d1mvqa\_ d1hq1a\_  
d1v6ia\_ d1dbna\_ d1qnwa\_ d1fx5a\_ d4l8qa\_ d1ioaa\_ d3n35a\_ d2h0ba\_  
d2erfa\_ d1h30a2 d1h30a1 d3mw4a1 d1pz7a\_ d2r1ba\_ d3v64a1 d1d2sa\_  
d3bopa1 d3mw3a1 d1okqa2 d1wioa4 d1ccza2 d1vcaa1 d1dr9a2 d2d9qb1  
d2nxyb2 d1adqa1 d1fnga1 d1uvqb1 d1zs8a1 d2vola1 d2vola2 d1mfbl2

d2jelh2 d1luwel2 d3qq4b1 d1kjvb\_ d1k5na1 d1osph2 d4odhl2 d1low0a1  
d1low0a2 d1bfob2 d3l9ra2 d3jtth1 d2fath2 d4elkb2 d1fn4b2 d2xfxb\_  
d1pg7x2 d1cqka\_ d4k71b2 d1lk2a1 d1eapb2 d4lfhg2 d1i4fa1 d2nw2a2  
d1kfah2 d1mhca1 d1h3ua1 d1wejh2 d1h0db2 d1a5fh2 d1kcvh2 d1mjuh2  
d1qqda1 d1kcrh2 d1k8ia1 d3huja2 d2nnab1 d1nfd2 d3mffb2 d1s9va1  
d1lk3h2 d1q0x12 d1fv1b1 d1neza1 d4rfeb2 d1r3ha1 d1a6tb2 d1kjva1  
d1pz5b2 d1onqa1 d2bc4a2 d1de4a1 d1k8da1 d1tcra2 d1dn0b2 d1nfd2  
d2xwtb2 d1bfoa2 d1mexh2 d1iakb1 d1ypzf2 d4f7ea2 d1q72l2 d2fbjh2  
d1fe8h2 d1clzh2 d1fngb1 d1uvqa1 d1vgka1 d1c16a1 d4j12a2 d4x99b2  
d1igtb3 d1je6a1 d1q72h2 d1nldh2 d1teth2 d2hmic2 d1l1ca2 d1l1ca1  
d1k8ib1 d1q0yh2 d1kfa12 d3frua1 d1pg7w2 d1u58a1 d1igyb4 d1igyb3  
d1hyrc1 d1klub1 d1deeb2 d1c12b2 d2bc4b2 d1kcvl2 d3wn5b1 d1lk2b\_  
d1lk3l2 d1mjul2 d1sm3h2 d1q0xh2 d1zvsal d1ydpal d1u8ib2 d1ypze2  
d1kcu2 d1op9a\_ d1y0la1 d1etzb1 d1egj11 d2gsib1 d1nj9a1 d4jfhd1  
d1aqk11 d1t2ja\_ d1lo4h1 d1zvya1 d3v4v11 d4enec1 d1kxtb\_ d5e8ea1  
d2pxya\_ d4weud\_ d1xiwc\_ d2esvd1 d1qznh\_ d1ogae1 d1f4xh1 d4n1hb\_  
d3ezjb1 d3mlw11 d1kfah1 d1etza1 d1b4jh1 d3cfic\_ d4w68a\_ d2arja1  
d1ek3a\_ d2ok0l1 d1vera\_ d1uwgh1 d1blnb1 d1fpth1 d1rzga1 d2giya1  
d4m3kb1 d1nc2a1 d2nyyd1 d1ncna\_ d1fbih1 d5dxwa\_ d4fqqa1 d1dqdh1  
d1jfq11 d1kelh1 d1faih1 d1frgl1 d1figl1 d4m6n11 d1fo0a\_ d4hxb11  
d3b5ga\_ d3quyd1 d2h9gb1 d1i8kb\_ d2dd8h1 d2ck0h1 d1eaja\_ d4w6wb1  
d2a6ib3 d1t66d1 d2e27h\_ d1ob1b1 d1f11b1 d2v7na1 d1ad0a1 d2xt1b1  
d1pskh1 d4i13b1 d2op4l1 d1a0q11 d1luwel1 d1za3a1 d1ncb11 d4uu9a\_  
d1bm3h1 d1cloh1 d1nqba2 d1cf8h1 d4y5va\_ d1mhph1 d5anma1 d4cdgc1  
d4ldeb\_ d1y0lb1 d2pcpb1 d1z3gl1 d1dfb11 d1fh5h1 d3g5xa1 d1tzib1  
d4dn3l1 d3zhka1 d2b1hh1 d2uyla1 d1f3dh1 d1nj9b1 d2agjh1 d2h1pl1  
d1q72h1 d8fabbb1 d1ndmb1 d1rjca1 d4u6hb1 d3upca\_ d2fbj11 d1osph1  
d1tvda\_ d2cjh\_ d4fhbd1 d1bd2d1 d1rz7h1 d3nn8a\_ d1blna1 d1knoa1  
d1nfda1 d2bmkb1 d1dq11\_ d1igyb1 d1igf11 d12e8h1 d3utza1 d1nc2b1  
d1rihh1 d4mwfb1 d4jvpa1 d1mieh1 d1rhfa1 d1fgn11 d1sbsh1 d1lp9e1  
d1dn0a1 d4lqf11 d1iaih1 d1kgcd1 d1mh5b1 d1gpol1 d2g60h3 d1f8t11  
d2jixd1 d4grwh\_ d1fo0b\_ d1bfob1 d1axsa1 d1u9ka\_ d1nmbh\_ d1h8na1  
d1h8na2 d1jguh1 d4eura1 d3sdy11 d35c8h1 d1w72l1 d1mvub\_ d1i9rh1  
d1ob1a1 d4wenb\_ d1yeeh1 d3ietc1 d1f58h1 d1ad0b1 d1mqkl\_ d1nbvh1  
d4b50a\_ d3r8bb\_ d1baf11 d1mamh1 d4rgne1 d2gsgb\_ d35c8l1 d1bafh1  
d1ailh1 d2pcpa1 d2fath1 d2x1pa\_ d1orsb1 d1ibgl1 d1shma\_ d1a2yb\_  
d1u0qa\_ d2coqa\_ d1hilb1 d1qfwi\_ d1jv5b\_ d1fn4b1 d5e0qa\_ d1nsh1  
d1plgl1 d4ocx11 d1kb5h1 d1rzfh1 d1pg7x1 d2fx7h1 d2oi9c\_ d1l7il1  
d3eyva1 d1d5il1 d4ffyl\_ d1a6wh\_ d1ac6a\_ d3dvfa\_ d1nfd2 d1mimh1  
d1ri8a1 d1jhlh\_ d3dura\_ d1fskb1 d1f97a1 d3so3b1 d2ak4d1 d1lp9f1  
d4z7wf1 d1l7th1 d4y5ya\_ d4x7ec1 d1emth1 d1ikf11 d1nlbh1 d4uta11  
d1bjma1 d1eapb1 d1u6ah1 d2dtgd1 d1kj2b\_ d1xeda1 d1cleh1 d1fgvh\_  
d2bnub1 d2fb4h1 d2dtgb1 d1ktrh\_ d1jpth1 d1qkz11 d4hepg\_ d2atpb1  
d1flrh1 d2hrpl1 d1mvfa\_ d1iaim1 d3k80a1 d2jb5h1 d3zkxc\_ d4grwe\_

d1it9h1 d1rhhb1 d3w9ec\_ d1e4wh1 d1sy6h1 d2j6eh1 d3qxta\_ d1jglh1  
d1p7ka1 d1tzhb1 d4n8pa1 d1gaf11 d2jelh1 d1wioa2 d4i0cc1 d1cicb1  
d1lmka2 d1lmka1 d1iqwh1 d1lorqb1 d1ejoh1 d1jnlh1 d4zg1a\_ d43c9b\_  
d1ggbl1 d1wejh1 d3q6fa1 d1f3dj1 d3c6la1 d1bqlh1 d3p9wb\_ d1a3r11  
d1h0db1 d2uzil\_ d1eo8l1 d1qfwl\_ d1n7ml1 d1igja1 d1c5ch1 d2a9mh\_  
d1rmfh1 d1fj1b1 d4heme\_ d1ccza1 d1a5fh1 d1logad1 d1dlfh\_ d1qa9b\_  
d1vgel1 d3qskb\_ d1sjxa\_ d4ozfg1 d1sq2n\_ d1qd0a\_ d1kcvh1 d1c5db1  
d3qcul1 d8faba1 d3bn9d1 d1mjuh1 d4y8dc\_ d7fabh1 d3dvgb1 d1lo0l1  
d1a6tb1 d1gigh1 d1kcrh1 d2hwz11 d1yjdc1 d3clfl1 d4krna\_ d1dl7l\_  
d1e6ol1 d1mexh1 d3r0ma\_ d4kkna\_ d1fns11 d1loaqh\_ d1rzia1 d1lucb1  
d1ncwl1 d4b41a\_ d1nfdfl d2mpah1 d2d7t11 d4grwf\_ d4b5ea\_ d1lk3h1  
d3u79a\_ d4u3xa\_ d1ghfl1 d1bvkb\_ d1mcww1 d1b88a\_ d1jrhh1 d32c2b1  
d4wemb\_ d1dsfh\_ d1op3h1 d1ce1l1 d1iqda1 d1qoka1 d1qoka2 d1qfuh1  
d2crya1 d1ay1h1 d1loaql\_ d3ab0b\_ d1rur11 d1t4kb1 d1bz7b1 d1n0xh1  
d1for11 d1lucb11 d4w6yb\_ d43c9a\_ d2aab11 d1tzia1 d4n1ca\_ d1k6qh1  
d3g9ab\_ d4tvsa1 d1ligmh\_ d1pz5b1 d3dx9a1 d3wxwh\_ d1nakh1 d1kcul1  
d3eaka\_ d4qlra1 d1cr9l1 d1d9ka\_ d1f4x11 d1deea1 d2i27n2 d1c12a1  
d2orb11 d1j8hd1 d1mcph1 d1c5da1 d1kenh1 d1bd2e1 d1h5ba\_ d4x7fc1  
d3upaa\_ d1t3fa1 d1indh1 d2dtgc1 d4hc111 d1zv5a1 d4wgvb\_ d1uwgl1  
d4f37k1 d1aqkh1 d1vesa\_ d3zkqd\_ d1fpt11 d1lo4l1 d1knob1 d3rrqa\_  
d1ct8b1 d4orz\_ d1mlbb1 d4hgkc1 d1dqdl1 d1bogb1 d4ozhe1 d1dr9a1  
d1i7za1 d1dn0b1 d1kell1 d1rzib1 d1ypzf1 d1wtla\_ d1hkfa\_ d1fail1  
d1figh1 d2vyre\_ d1sjva\_ d1ohqa\_ d1bfoa1 d1pkqb1 d1mjul1 d1b4j11  
d1nsn11 d2arjb1 d1p4bh\_ d4aj0a\_ d3nn8b\_ d2rcja1 d1f2xk\_ d4v1dd\_  
d1adqh1 d2eksa\_ d4k3ga\_ d1jfqh1 d1uweh1 d1frgh1 d4gftb\_ d1uz8b1  
d4nlea\_ d1bm3l1 d1clol1 d3mcka1 d2vq1a1 d1ae6h1 d4aq1b1 d1uj3b1  
d1nbqa1 d1fh5l1 d2ck0l1 d2ywza\_ d1q72l1 d4nxbx\_ d1hila1 d4hz1b1  
d2j88l1 d1zmya1 d1cd0a\_ d1a4ka1 d1pskl1 d1a0qh1 d4krmb\_ d1ncbh1  
d2fbjh1 d1j8he1 d1i3ua\_ d1cf8l1 d1fe8h1 d2p1ya1 d1eeqa\_ d2x89a\_  
d1ol0a\_ d2r0lh1 d1ub5a1 d1dfbh1 d3eyvb1 d4jdvb1 d4p2cg\_ d2gsia1  
d2agj11 d1u3ha1 d2h1ph1 d1rih11 d1fskc1 d1boga1 d2a77l1 d1osp11  
d1qfoa\_ d3dwta\_ d2fx7l1 d1rz7l1 d3stba1 d1pkqa1 d1b6da1 d1dzba2  
d1dzba1 d1kj2a\_ d4l1ha\_ d1rzgb1 d1dq1h\_ d12e8l1 d1miel1 d1jmaa\_  
d1sbs11 d1fgnh1 d1f58l1 d1mqkh\_ d1ndgb1 d3qegl1 d1iail1 d2aw2a1  
d1tqbc1 d3fo2a1 d4dkaa\_ d1f8th1 d2g60l1 d2ywya\_ d1uj3a1 d1yc7a\_  
d3bd3a\_ d4w6xb1 d1nmb1\_ d1i8ka\_ d1rjlb1 d1ypze1 d1p7kb1 d1kxqe\_  
d1gpoh1 d2z4qa1 d1w72h1 d1i9r11 d4qgya1 d4xt1c\_ d2qqnh1 d1cical  
d3c08h1 d2cd0a\_ d2bdnh1 d1hnga1 d1mam11 d1nldh1 d1cr9h1 d4lcih1  
d3bkyh1 d3qg7l1 d1ai1l1 d1kxvc\_ d4iosd\_ d1l7ih1 d2x1qa\_ d1ub6b1  
d3k74b\_ d1libgh1 d1teth1 d1igya1 d1hxma1 d2x6ma\_ d2e7la\_ d5e03a\_  
d1qfwm\_ d2r0kh1 d1igjb1 d1rurh1 d1plgh1 d1mj8h1 d1yuhb1 d3fmg11  
d1rzfl1 d1emt11 d1ad9b1 d1igtb1 d1nlb11 d1d5ih1 d3k7ua\_ d4ffyh\_  
d1bwwa\_ d3dvga1 d1a6ta1 d1fgvl\_ d4qxgl1 d1mim11 d1jh11\_ d2hffb1  
d2hh0l1 d1qkzh1 d1l7t11 d1afvh1 d1iaii1 d2cjuh\_ d1um5h1 d2ghwb2

d2ghwb1 d1kgce1 d2fgwh1 d1likfh1 d1dvfd\_ d2i24n1 d2xtjb\_ d1za3b1  
d2yc1a\_ d2hh0h1 d2x1oa\_ d1bvka\_ d1rjla1 d5e7ba1 d1igta1 d1l11b1  
d2fb4l1 d1mvua\_ d1jptl1 d32c2a1 d1fvca\_ d1iqdb1 d2hrph1 d2p4ab\_  
d4qola\_ d1p2cb1 d1wt5c\_ d1t4ka1 d5c1mb\_ d1it9l1 d1bz7a1 d1b2wh1  
d1e4wl1 d1jnl11 d1yedb1 d1za6b1 d3u7aa\_ d1igfh1 d3gnml1 d1orsa1  
d1wejl1 d1a2ya\_ d1hxmb1 d1gafh1 d2j4wh1 d1pz5a1 d1j05a\_ d1a3rh1  
d4fqll1 d1qfwh\_ d1eo8h1 d1n7mh1 d4s11a\_ d1kegh1 d5da4a\_ d1iqwl1  
d3whxb1 d1vgeh1 d1deeb1 d1c12b1 d1t2ql1 d1ad9a1 d3gsnb1 d3b2uc1  
d1ggbh1 d1t3fb1 d1nakl1 d4ocmc\_ d1lila1 d2v7hb3 d2esve1 d1mcoh1  
d2qr0b1 d2q3aa\_ d1ct8a1 d1kcr11 d2pxyb\_ d2uzih\_ d5c3ld\_ d3durb\_  
d1c5cl1 d2ak4e1 d1d17h\_ d1xiwd\_ d1mlba1 d1rmfl1 d1i7zb1 d1dlfl\_  
d2xa3a\_ d5bq7b1 d1dqqb1 d3h42l1 d1egjh1 d1kcvl1 d1fe8l1 d2j6e11  
d1f3rb2 d1lk3l1 d1sm3h1 d1q0xh1 d1ghfh1 d7fabl1 d1igch1 d1lo0h1  
d4idla\_ d5c2b1\_ d1jrh11 d1lila1 d3zhda1 d4kfzc\_ d1b0wa\_ d1e6oh1  
d1mexl1 d4krpb\_ d1fnsh1 d1ncwh1 d4hgma\_ d4eigb1 d4rzca\_ d2mpa11  
d4y5xa\_ d5en2b1 d3lrga1 d4ej1c1 d1rhha1 d1j05b\_ d1forh1 d1q9wb1  
d2wzpd\_ d2aq2a1 d1h0da1 d3revb1 d2ij0c1 d1tzha1 d4m7j11 d1k6ql1  
d3b9kc1 d1igml\_ d3quea1 d1dsfl\_ d1celh1 d1kcuh1 d1zvha1 d1zvoa1  
d1tqbb1 d1ayl11 d2qsc11 d2cgrh1 d1n10h1 d1kenl1 d3eo0a1 d4n9ob1  
d1n0xl1 d3k1kc\_ d2m9wa1 d3dfxa\_ d2aq2b1 d1ck1a1 d1lenfa1 d1i4pa1  
d1v1oa1 d1et9a1 d1esfa1 d2g9hd1 d4ohja1 d1klud1 d1bxta1 d1eu3a1  
d1ty0a1 d1fnua1 d2qaln1 d2cqva1 d1fhga\_ d2k1ma\_ d2d12a1 d1biha3  
d1biha1 d1biha4 d3qp3a1 d1g1ca\_ d1gxea\_ d1cvsc2 d1cvsc1 d1xmwa2  
d1m4ka2 d2otpa2 d1biha2 d1rhfa2 d2fcba2 d2fcba1 d1wwbx\_ d1gsma2  
d1epfa1 d1epfa2 d2dava1 d1waaa\_ d1f97a2 d1x44a1 d1vcaa2 d1fnla2  
d1fnla1 d3b5ha2 d3h8na2 d3h8na1 d1bjba1 d1bjba2 d1pd6a\_ d1f2qa2  
d1f2qa1 d3cx2a\_ d1nbqa2 d3b5ha1 d1n26a1 d1xiwb\_ d1xaua\_ d1fltx\_  
d2ifga1 d1olla1 d1olla2 d1cs6a4 d1cs6a3 d1cs6a2 d1cs6a1 d2gw5a2  
d1sy6a1 d1xiwa\_ d1lucta2 d1lucta1 d1ry7b2 d1gl4b\_ d1qz1a3 d1olza1  
d2c9aa1 d1wwca\_

**Family-77 (c.67.1.3)**

**Positive dataset contains 8 protein sequences.**

d4q75a\_ d2bkwa1 d1t3ia\_ d3kgwa\_ d2ctza1 d2rfva\_ d2ch1a1 d1pffa\_

**Negative dataset contains 4000 protein sequences.**

d2xlba\_ d3m83a1 d1sefa\_ d1sfna\_ d1rc6a\_ d1xkla\_ d2wfla\_ d1ddla\_  
d1auyb\_ d1fwxa1 d1libya\_ d1f56a\_ d1bypa\_ d1azca\_ d1ws8a\_ d3u25a\_  
d1cuoa\_ d1lid2a\_ d1rkra\_ d2iaac\_ d4dp1x\_ d1nwpa\_ d2gima\_ d2i7sa\_  
d1qhqa\_ d3ehbb1 d1fftb1 d1gyca3 d1hfua2 d1kbva1 d1kbva2 d1sdda1  
d1sdda2 d1gyca1 d1gyca2 d1mzya1 d2bw4a1 d1aoza1 d1aoza3 d1aoza2  
d1kyaa2 d1kyaa3 d1kyaa1 d1mzya2 d4e9sa1 d1sddb1 d1sddb2 d1hfua1  
d1hfua3 d1oe1a2 d1oe1a1 d1v10a2 d1v10a3 d1v10a1 d3kasa1 d3bi1a3  
g1or0.1 g1cp9.1 g1e3a.1 d1a3qa1 d1iknc\_ d3brda1 d1p7h11 d1oy3c\_  
d1imhc1 d1zk9a1 d2cxka1 d2bema\_ d1pama1 d1ea9c1 d1qhoa1 d2fhfa2  
d2fhfa1 d1k3ia1 d1j0ha1 d1csla1 d2bhua1 d1edqa1 d1f1sa2 d1lut9a2

d1gvia1 d1txka1 d4alac\_ d1pjwa\_ dlrera1 d1s6na\_ d3uzqb\_ d2phla2  
d2phla1 d1fxza2 d1fxza1 d1lrha\_ d1uija1 g1dgw.1 d2v09a\_ d1uika2  
d1uika1 d2pa7a1 d1wlta1 d1nxma\_ d2c0za1 d1nepa\_ d1ds6b\_ d1fstb\_  
d1ju8a\_ d2bjca1 d2hsga1 d1qpza1 d1efaa1 d1ydwa2 d2nvwa2 d1zh8a2  
d1qkia2 d1xeaa2 d1t1ta2 d1r0ka3 d1j5pa3 d1vkoa2 d1vm6a2 d3qvs2  
d1gr0a2 d1p1ja2 d2ovga\_ d1sq8a\_ d1rzsa\_ d3kz3a\_ d3gpdg2 d2q49a2  
d1hdgo2 d2g17a2 d2cvoa2 d2czca1 d3pwka2 d1obfo2 d1i32a2 d1zyao2  
d2pkqo2 d1b7go2 d2hjsa2 d1cf2o2 d1vkna2 d1nvmb2 d1ux8a\_ d1dlya\_  
d4i0va\_ d2bkma\_ d1dlwa\_ d2bmma\_ d2msya\_ d2djoa1 d2r5za\_ d1au7a1  
d1f43a\_ d2lmda1 d1akhb\_ d1s7ea1 d3nara\_ d1zq3p1 d2craa1 d1mija\_  
d4uuta\_ d3a01a\_ d1x58a1 d3rkqa1 d3cmya1 d2cqa1 d2da6a1 d1e3oc1  
d1fjla\_ d1mh3a1 d1ig7a\_ d1x41a1 d1wh7a1 d1gt0c1 d2mw8a\_ d1lfup\_  
d1x2ma1 d1b72a\_ d1wi3a1 d1jgga\_ d1wjha1 d1x2na1 d1mnmc\_ d2cuea1  
d3k2aa\_ d2hosa\_ d2jwta2 d1pufa\_ d1octic1 d2hi3a\_ d1b8ia\_ d4j19a\_  
d3lnqa\_ d1wh5a1 d1b8ib\_ d1fexa\_ d2cqra1 d1ug2a1 d2cqqa1 d2ajea1  
d4a69c\_ d1h8ac1 d2crga1 d2iw5b1 d1xc5a1 d1ofcx1 d2cu7a1 d1wgxa1  
d2cjja1 d2ckxa1 d1gvda\_ d1hcra\_ d1tc3c\_ d1gdta1 d1u78a2 d2iu5a1  
d1zk8a1 d2g7sa1 d2fd5a1 d2np5a1 d1z0xa1 d2id6a1 d2d6ya1 d2i10a1  
d1vi0a1 d2oi8a1 d3c07a1 d2ns7a1 d2fq4a1 d2yvea1 d1t33a1 d2o7ta1  
d2np3b1 d2g7ga1 d2gena1 d2fbqa1 d2g71a1 d2gfna1 d2g3ba1 d2jj7a1  
d2hyja1 d1sgma1 d1ui5a1 d2hkua1 d2id3a1 d4jyka1 d1prtc2 d1prtb2  
d3lv8a\_ d1s3ga1 d1s4qa\_ d3tvta2 d1uf9a\_ d1khta\_ d1ckea\_ d1osna\_  
d1p5zb\_ d4tmka\_ d3cm0a\_ d1tmka\_ d1jaga\_ d3h86a\_ d1t0hb\_ d1nn5a\_  
d2h92a\_ d3kb2a1 d2c95a1 d1yj5a2 d1kgda\_ d1ly1a\_ d2ak3a1 d1vyva2  
d1deka\_ d2grja1 d1p3ja1 d1y63a\_ d1e4ya1 d1s96a\_ d3iija1 d1lvga\_  
d1nksa\_ d1vyua2 d4e22a\_ d1qf9a\_ d1jjva\_ d1q3ta\_ d1ki9a\_ d1lw7a2  
d1teva\_ d1kjwa2 d1gsia\_ d2iyva2 d1kaga\_ d1viaa\_ d1e6ca\_ d1g3ma\_  
d1j99a\_ d1t8ta1 d1nsta\_ d1fmja\_ d1zrha\_ d1ls6a\_ d2a3ra\_ d1aqua\_  
d2zptx\_ d3ckla\_ d1teta\_ d1q44a\_ d2gwha\_ d1odfa\_ d1uj2a\_ d4gi7a\_  
d2jeoa1 d1z0ja1 d3umra2 d3gj0a1 d2gaoa1 d1yzga1 d1x3sa1 d1g7sa4  
d1puja\_ d1udxa2 d1kk1a3 d2o52a\_ d1jwyb\_ d1zcaa2 d1zcba2 d2fv8a1  
d2cjwa\_ d3dz8a1 d1xzpa2 d1vg8a\_ d4qxaa\_ d2ew1a1 d1x1ra1 d2bcgy\_  
d3doea1 d3cona\_ d3rega\_ d3wyga\_ d1upta\_ d2b6ha1 d1zd9a1 d1lnza2  
d1r5ba3 d1n0ua2 d1r2qa\_ d2f91a1 d2rhda\_ d3q3jb\_ d3q85a\_ d1efma1  
d1r8qa\_ d2gf9a1 d2akab1 d1ek0a\_ d1z08a1 d2gcoa1 d2dy1a2 d4g01b\_  
d2cxa1 d1svia\_ d3q72a\_ d1ni3a1 d4ac9a4 d2erxa1 d2bmea\_ d1wxqa1  
d2gf0a1 d4ldja1 d1zunb3 d1d5ca\_ d4lv5b\_ d1efca3 d1kmqa\_ d2g6ba1  
d3lrpa\_ d1tada2 d2y8ea\_ d4rd4a1 d1z06a1 d2heia\_ d3a58b\_ d1u01a2  
d1d2ea3 d1zj6a1 d2ocba\_ d3rwoa\_ d1mr3f\_ d2e9sa1 d4u5xa1 d2iwra\_  
d2fn4a1 d3bwdd\_ d2nzja1 d2atva1 d2ksqa\_ d3l43a\_ d1mkya2 d1mkya1  
d1wmsa\_ d1jnja3 d2rmka\_ d1f6ba\_ d1f60a3 d1gota2 d1jala1 d2fh5b1  
d1g16a\_ d2wblc\_ d1m7ba\_ d1wf3a1 d1f5na2 d1t9ha2 d1z6xa1 d1z0aa1  
d2fg5a1 d2a5ja1 d2bcjq2 d1s0ua3 d1ky3a\_ d4y0va\_ d4lhwa\_ d2qmea1  
d2atxa1 d1legaa1 d1ryha\_ d1moza\_ d1nrjb\_ d2erya1 d3bfka\_ d1puia\_

d1fzqa\_ d3j3az1 d3t5ga\_ d1shza2 d3defa\_ d2f7sa1 d3raba\_ d3tsoa\_  
d3aq4a\_ d2a17a1 d3sfva1 d3bc1a\_ d2ncda\_ d1sdma\_ d3h4sa1 d2heha\_  
d2grya\_ g3kin.1 d1kk8a2 d1br2a2 d1goja\_ d1f9va\_ d2mysa2 d1lkxa\_  
d3t0qa\_ d4db1a1 d3gbja\_ d1ry6a\_ d1kb0a1 d1jmx2 d1jmx1 d1pbya1  
d3h3no1 d3h3no2 d3ezwa2 d3h1jd1 d2d0oa3 d2d0oa2 d1nbwa3 d1hroa\_  
d4gedb\_ d3zooa\_ d1mz4a\_ d1gu2a\_ d1f1fa\_ d1dvva\_ d1c6ra\_ d1c75a\_  
d1e29a\_ d1gdva\_ d1cnoa\_ d1h32b\_ d1co6a\_ d2bh4x\_ d2aiua\_ d5cytr\_  
d1jdl1a\_ d1i8oa\_ d2zboa\_ d3dmia\_ d1ls9a\_ d1wvec\_ d2yk3a\_ d3ph2b\_  
d1dw0a\_ d5aura\_ d1qn2a\_ d1f1ca\_ d2nqya\_ d1h4ga\_ d1hixa\_ d1oa2a\_  
d1olra\_ d3b7ma\_ d4h7ma1 d3wp3a\_ d2vgda\_ d1igoa\_ d3zsea\_ d2nlra\_  
d3wx5a\_ d1oa3a\_ d1pvxa\_ d1m4wa\_ d1f5ja\_ d1oa4a\_ d1ks5a\_ d4ix1a1  
d3sita1 d1evsa\_ d1cnt1\_ d1pvhb\_ d1z7ca\_ d1huwa\_ d1bgea\_ d1rhga\_  
d1f6fa\_ d1f45b\_ d1i1rb\_ d1axia\_ d1letea\_ d3tgxb\_ d1scfa\_ d2z3qa1  
d3qb1a\_ d1hula\_ d1m48a\_ d4nkqb\_ d1eera\_ d1v7mv\_ d5e4ea\_ d2o27a\_  
d3b5ka\_ d2psma1 d4zf7a\_ d3uf5a\_ d4x51a\_ d1d9ca\_ d4ypgc1 d3oq3a\_  
d1n1fa\_ d1aula\_ d1wu3i\_ d3bes1\_ d3ux9a\_ d4dnxa2 d1v47a2 d1g8fa2  
d1jhda2 d1x6va2 d3rbaa\_ d2qtra\_ d3l92a\_ d1f9aa\_ d1qjca\_ d2h29a\_  
d1vlha\_ d1od6a\_ d1lw7a1 d1mrza2 d4ruka\_ d3wdpp1 d3wq5a\_ d1gnxa\_  
d4gxpa\_ d4hz8a\_ d1e4mm\_ d3aiua\_ d1wcga1 d1qvba\_ d3ahxa\_ d1v02a\_  
d2dgaa\_ d1pbga\_ d1vffa1 d1qoxa\_ d4ha4a\_ d2el7a\_ d1iq0a2 d1irxa2  
d1r6ta2 d1livsa4 d2cyba\_ d1rqga2 d1j09a2 d2yxna\_ d1f7ua2 d1h3fa1  
d1ffya3 d2g36a1 d1nzja\_ d1jila\_ d1n3la\_ d1i6la\_ d1pfva2 d1h3na3  
d3n9ia\_ d3sz3a1 d4aw8a\_ d3sw2a\_ d1moxc\_ d1dx5i3 d1edmb\_ d1aut12  
d1aut11 d1nqlb\_ d1dva11 d1szba2 d1kigl\_ d2y5fl\_ d1ijqa2 d1gk5a\_  
d1g1sa2 d1nt0a3 d1xdtr\_ d1lmja2 d1lmja1 d1nzia2 d2wphe\_ d1klil\_  
d1pfx12 d1pfx11 d1p9ja\_ d1g1ta2 d1f7ea\_ d4yzub\_ d2y5ia\_ d1qlsa\_  
d1psra\_ d3n22a\_ d2egda\_ d4ggfc\_ d2wcea\_ d2luca\_ d4aqia\_ d3nsia\_  
d2lp3a\_ d1j55a\_ d1a4pa\_ d1k8ua\_ d1nsha\_ d1pvaa\_ d3fs7a\_ d2pvba\_  
d1ttxa\_ d1rwya\_ d2kyfa\_ d1rk9a\_ d1a75a\_ d1exra\_ d1tiza1 d1nyaa\_  
d1g8ia\_ d1ggwa\_ d1wdcc\_ d3fwba\_ d1ggza\_ d2o5ga\_ d1ctaa\_ d1m45a\_  
d3i5gc\_ d1s18a\_ d1fpwa\_ d2scpa\_ d2roaa\_ d4aqra\_ d3pn7b\_ d1br1b\_  
d2mysb\_ d1s6ca\_ d1bjfa\_ d2obha\_ d1jfka\_ d1jf0a\_ d1qv0a\_ d1lkja\_  
d2mlfc\_ d2m97a\_ d2d8na\_ d4by5a\_ d1jbaa\_ d4nqga\_ d1wdcb\_ d2mysc\_  
d1j7qa\_ d1s6ia\_ d1uhka2 d1r2ua\_ d1dtla\_ d3kf9a\_ d3pn7c\_ d1fi6a\_  
d1c07a\_ d1gjya\_ d1y1xa\_ d1hqva\_ d1dvia\_ d1df0a1 d1qxp2 d4usla\_  
d1k94a\_ d1sfsa\_ d1wkya2 d1uuqa\_ d3wh9a\_ d4m1ra\_ d1xyza\_ d4xuya\_  
d2je8a5 d4bf7a1 d3cuia\_ d1ur4a\_ d1qw9a2 d1odza\_ d2vzsa5 d1bqca\_  
d2x2ya1 d1hjqa\_ d1qnra\_ d4y7ea1 d1vjza\_ d4k68a\_ d2v3ga\_ d4hpga\_  
d1nofa2 d1nq6a\_ d1h4pa\_ d1aq0a\_ d3ziza\_ d4bs0a\_ d1ecea\_ d1h1na\_  
d1ta3b\_ d1w91a2 d1i1wa\_ d1uhva2 d1us3a2 d1legza\_ d7a3ha\_ d1tvna1  
d3nyda1 d1ghsa\_ d2cyga1 d4xv0a\_ d2c8na2 d1w32a\_ d3emca\_ d1v6ya1  
d1foba\_ d2uwfa1 d2fgla\_ d3niya1 d2c0ha1 d1rh9a1 d1yq2a5 d1szna2  
d1fa2a\_ d1pama4 d5do8a1 d1ea9c3 d1hx0a2 d2fhfa5 d1qhoa4 d1avaa2  
d1m53a2 d4m8ua1 d2gjpa2 d1lwha2 d4howa1 d1ktba2 d1j0ha3 d3vm5a1



d2x1ia\_ d1wzaa2 d1uasa2 d2diea1 d1mxga2 d1ht6a2 d1eswa\_ d1iv8a2  
d5cpsa\_ d1ud2a2 d1zjaa1 d3gbea1 d1kwga2 d1wdpa\_ d1gcya2 d1g5aa2  
d1hvx2 d3dhpa2 d2bhua3 d4do4a1 d3qgva1 d1e43a2 d1g94a2 d2d3na2  
d1gjwa2 d1gvia3 d1x1na1 d1r7aa2 d1tz7a1 d4c7ga2 d2gjxa1 d1nowa1  
d1jaka1 d1yhta1 d4toqa\_ d1wb0a1 d1w9pa1 d1eoka\_ d1itxa1 d1kfwa1  
d1goia2 d1edqa2 d2gsja\_ d1hjxa1 d1jnda1 d1vf8a1 d1etob\_ d1umqa\_  
d1g2ha\_ d1mixa2 d1e5wa2 d1j19a2 d1isna2 d2a16b2 d3syxa1 d1mkea1  
d2p8va\_ d1xoda1 d1evha\_ d1qc6a\_ d1legxa\_ d2hmta\_ d1lssa\_ d2v76a\_  
d1wj1a1 d1aqca\_ d1qqga2 d1qqga1 d1ntva\_ d1n3ha\_ d4dbba\_ d3f0wa1  
d1p3ra\_ d1wgua1 d2cy4a1 d3hqca\_ d1wvha1 d1xr0b1 d3nvva1 d1krha3  
d2h88b1 d1n62a2 d1t3qa2 d1kf6b2 d1zoyb1 d1ffva2 d1dgja2 d1rm6c2  
d1d4ua2 d9ldta1 d2ewda3 d1up7a1 d2dfda1 d1s6ya1 d1vjta1 d7mdha1  
d1hyea1 d1t2da1 d1ojsa3 d1b8pa1 d1ldna1 d1hyha1 d1civa1 d2a92a1  
d1ez4a1 d1i0za1 d1y6ja1 d1gv0a1 d1ur5a1 d1lllda1 d1lobba1 d1v8ba1  
d1gdha1 d1l7da1 d2dlda1 d1mx3a1 d1ygya1 d1qp8a1 d1li4a1 d1j4aa1  
d2naca1 d1npya1 d3t4ea2 d1a4ia1 d1o0sa1 d2hk9a2 d2egga2 d1b26a1  
d1bvua1 d1gq2a1 d1clda1 d1leha1 d1gtma1 d1euzal d1nvtal d3dona2  
d1ledza1 d1vi2a1 d1p77a1 d1nyta1 d1b0aa1 d1vl6a1 d1v9la1 d1txga2  
d3f47a1 d1mv8a2 d2pv7a2 d1xc2a3 d2ahra2 d4xiya1 d2f1ka2 d1pgja2  
d1i36a2 d1np3a2 d1lj8a4 d1teaa3 d1qmg2 d2i76a2 d2g5ca2 d1wdka3  
d1dlja2 d3cuma3 d1kola2 d1f8fa2 d1qora2 d1jqba2 d1vj0a2 d1cdoa2  
d1gu7a2 d1d1ta2 d1xa0a2 d2dm6a2 d1jvba2 d1rjwa2 d1llua2 d1tt7a2  
d1piwa2 d1o89a2 d1iz0a2 d1e3ja2 d1yb5a2 d1uufa2 d1vj1a2 d1e3ia2  
d3gpdg1 d1vc2a1 d2nvwa1 d1u8fo1 d1ydwa1 d1hdgo1 d2g17a1 d1cf2o1  
d2czca2 d1r0ka2 d1lobfo1 d2cvoa1 d1ebfa1 d1h6da1 d1i32a1 d1zh8a1  
d2q49a1 d1qkia1 d3pzra1 d1xeea1 d1vkoa1 d1vm6a3 d3qvsa1 d2pkqo1  
d1b7go1 d1gr0a1 d1p1ja1 d1lc0a1 d1j0xo1 d3pwka1 d2hjasa1 d1zyao1  
d1vkna1 d1tlta1 d1nvmb1 d3sjua\_ d3ojfa1 d1xu9a1 d2jjya1 d1n7ha\_  
d1ylpa1 d1h5qa\_ d1jtva\_ d4fs3a\_ d2bkaa1 d1gy8a\_ d2c5aa1 d1ulsa\_  
d1ooea\_ d2b69a1 d1y5ma1 d1spxa\_ d1ae1a\_ d1bxka\_ d1ydea1 d1gega\_  
d1hdoa\_ d1o5ia\_ d1e6ua\_ d1snya1 d2rhca\_ d3zv4a\_ d5ceja\_ d2d1ya1  
d3w8ea\_ d2fmua1 d1x1ta\_ d1rpna\_ d3ay7a1 d1k2wa\_ d1eq2a\_ d2hrba1  
d3ruaa\_ d2ew8a1 d4hwka\_ d1xgka\_ d2bd0a1 d1yo6a1 d2a35a1 d2ntva\_  
d1vl8a\_ d1hdca\_ d4bkua\_ d2ag5a1 d2q45a\_ d1nffa\_ d4iy1a\_ d1zbqa1  
d1kewa\_ d1ek6a\_ d1ja9a\_ d2q46a2 d1iy8a\_ d1cyda\_ d2ptga\_ d1hxha\_  
d1uzma1 d3lyla\_ d4m89a\_ d3wyea\_ d2blla1 d1w6ua\_ d1sb8a\_ d2q2va\_  
d4nr0a\_ d1e6wa\_ d2gasa\_ d3oiga1 d2bgka1 d1mxha\_ d1vl0a1 d1rkxa\_  
d1r6da\_ d1wmaa1 d1e7wa\_ d2c07a1 d1xkqa\_ d3tzha\_ d1g0oa\_ d3lz6a\_  
d1qyca\_ d1ledoa\_ d1gz6a\_ d1oc2a\_ d1t2aa\_ d1zema1 d2xoxa\_ d1z45a2  
d1geea\_ d1p33a\_ d3lt0a\_ d4e6pa\_ d2wyua\_ d1db3a\_ d4q9na\_ d1xhla\_  
d4o1ma\_ d1fmca\_ d2uvda\_ d2gdza1 d1uaya\_ d2z1ma\_ d2o23a2 d2fr1a2  
d2fr1a1 d1qsga\_ d1qyda\_ d4zjua\_ d2a4ka1 d1yb1a\_ d1wvga1 d1yxma1  
d3f4ba\_ d1mg5a\_ d1xg5a1 d1ex0a4 d2f4ma1 d1x3za\_ d1mdwa\_ d1ziva1  
d1zcmal d3ioqa\_ d1fh0a\_ d1o0ea\_ d1khqa\_ d1m6da\_ d2cb5a\_ d1cs8a\_

g8pch.1 d1s4va\_ d2pnsa\_ d1vsna1 d1mira\_ d1iwda\_ d2oula\_ d7pcka\_  
d3bwka\_ d3bcna\_ d2p86a\_ d1pvja\_ d1gece\_ d1deua\_ d4bs6a\_ d1xkga1  
d1cqda\_ d1jqpa2 d2c0ya\_ d2bdza\_ d3p5ua\_ d1ex4a2 d1c6va\_ d2jk6a2  
d2jk6a1 d1feca1 d1feca2 d1lpfa1 d1lpfa2 d1xhca1 d1xhca2 d1dx1a2  
d1dx1a1 d1gera2 d1m6ia2 d1onfa1 d1onfa2 d3lada2 d3lada1 d1w4xa1  
d1w4xa2 d1mo9a1 d1xdia1 d1f12a2 d1f12a1 d1fcda1 d1fcda2 d1h6va2  
d1h6va1 d1mo9a2 d1gv4a2 d1gv4a1 d2gv8a2 d2gv8a1 d1aoga1 d1aoga2  
d1hyua1 d1ebda1 d1ebda2 d3dk9a1 d1q1ra2 d1q1ra1 d1gesa1 d1zbf1a1  
d2z1ha\_ d2etja1 d3qioa1 d1j11a\_ d2e41a\_ d1j12a\_ d21sna1 d1io2a\_  
d1uaxa\_ d2yv0x\_ d1mu2a1 d1ekea\_ d1ps9a2 d1o94a2 d1lqta1 d1pn0a1  
d1reoal d1ju2a1 d2f5va1 d3c96a1 d2gmha1 d1gpea1 d1o5wa1 d1n4wa1  
d1k0ia1 d2dw4a2 d2ivda1 d1seza1 d2voua1 d1kdga1 d1s5ja1 d2hbja2  
d2igia\_ d1wlja\_ d1qhta1 d4dlea1 d1tgoa1 d2f96a1 d3tr8a1 d3mxma\_  
d1q8ia1 d1y97a1 d1w0ha\_ d2py5a1 d1noya\_ d1d5aa1 d1yt3a3 d2guia\_  
d3mwpa1 d4kb1a\_ d1x14a1 d3vsqa\_ d2gixa1 d1p7ba1 d1nu0a\_ d2d5ra1  
d1js9c\_ d1f15b\_ d1za7a\_ d11aja\_ glapy.1 d3ljqa\_ glk2x.1 d1offa\_  
d1frra\_ d3wcqa\_ d1e9ma\_ d115pa\_ d1wria\_ d1i7ha\_ d3av8a\_ d1czpa\_  
d1rfka\_ d3plma1 d3b2ga\_ d2bt6a2 d1v58a1 d1t3ba1 d4ilfa2 d4npba2  
d1wgqa1 d1v89a1 d2coda1 d1zc3b\_ d1wg7a1 d1u5ea1 d1v61a1 d2coca1  
d2ys1a1 d1v5pa1 d1nty2a d1wjma1 d1wi1a1 d1u29a\_ d1xx0a1 d1unqa\_  
d2zkmx3 d1fhoa\_ d1v88a1 d2adza1 d1x1fa1 d1p6sa\_ d2coaa1 d1btka\_  
d1v5ma1 d1faoa\_ d2x18a\_ d1dyna\_ d1x1ga1 d4kaxb\_ d2j59m1 d1kilb2  
d1xcga2 d1txda2 d1u5da1 d1dbha2 d1wl1ha\_ d1upqa\_ d1v5ua1 d1foea2  
d2fj1a1 d1eaza\_ d2dfka2 d2cofa1 d1kz7a2 d1k8ka2 d1k8ka1 d3uleb1  
d3i33a2 d3i33a1 d1bupa1 d1dkgd2 d1dkgd1 d4ci6a2 d1jcf1a1 d4a2ba2  
d2fxua1 d1yaga2 d1yaga1 d4cbua2 d1bupa2 d1r7ha\_ d1faaa\_ d1wika1  
d1xfla\_ d1ttza1 d2f51a1 d1ti3a\_ d1nhoa\_ d1sena\_ d2i4aa\_ d1lep7a\_  
d1zmaa1 d3lefa1 d3diea1 d2yana1 d1z6na1 d1oaza\_ d3zywa1 d4aj8a\_  
d1nm3a1 d4fiwa\_ d1wmja\_ d4hs1a1 d1iloa\_ d1xwaa1 d1wjka1 d2vm1a\_  
d1fb6a\_ d1gh2a\_ d1h75a\_ d1nw2a\_ d1kx5b\_ d3a6na\_ d4m6ba2 d2nqbd\_  
d3wkjd\_ d2yfwe\_ d4h9na\_ d5bnxa\_ d1kx5c\_ d3r45a\_ d1eqzb\_ d4jjnb\_  
d1f66c\_ d1eqza\_ d4wnnb\_ d1kx5a\_ d1u35c1 d1id3a\_ d2nqbc\_ d1kx5d\_  
d1f1ea\_ d1b67a\_ d1bh9b\_ d1tafb\_ d1jfib\_ d1q9ca\_ d1h3ob\_ d2byka1  
d1n1ja\_ d4g92b\_ d1bh9a\_ d1jfia\_ d1h3oa\_ d2bykb1 d1n1jb\_ d1pd212  
d1nhya2 d2a2ra2 d1k0dd2 d1f2ea2 d1gsua2 d1f3ba2 d2fhea2 d2pvqa1  
d1tw9a2 d1oyja2 d1e6ba2 d1k0ma2 d3ik7a1 d4is0a1 d1r5aa2 d1j1va2  
d1m0ua2 d3gtub2 d1z9ha2 d1okta2 d1axda2 d2gsra2 d1tu7a2 d1k3ya2  
d1zgma1 d1b48a2 d1gnwa2 d1gwca2 d2gsta2 d1glqa2 d1oe8a2 d1pn9a2  
d1v2aa2 d1fw1a2 d1duga2 d1ovna2 d1nira1 d1qksa1 d1qsaa2 d2csua1  
d3q9ub\_ d2yv1a1 d3q9na\_ d2d59a\_ d1oi7a1 d2yv2a1 d1euca1 d1y81a1  
d3wyha\_ d4g9sa1 d3gxra\_ d1qqya\_ d1gd6a\_ d1f6ra\_ d1livma\_ d2gv0a\_  
d1iiza\_ d2z2fa\_ d1j8xa\_ d1gh1a\_ d1741a\_ d1691a\_ d2o4wa\_ d1p37a\_  
d1k28a3 d1xjta1 d1jtma\_ d2f2qa\_ d4e97a1 d1iyka2 d1iyka1 d1rxta1  
d1iica2 d2pjsa1 d1k11a\_ d2i7ra1 d1ecea\_ d1xqaa1 d5cj3a1 d1npba\_

d1jifa\_ d2p7oa\_ d1r9ca\_ d1mpya2 d1kw3b2 d1kw3b1 d4ghga1 d1tfza1  
d3isqa1 d3isqa2 d1sqia1 d1sqia2 d1lkda1 d1mpya1 d1cjxa2 d1cjxa1  
d1sp9b2 d1t47a1 d1t47a2 d1f1ua2 d1sp8a1 d1sp8a2 d1f1ua1 d1s5ja2  
d1qhta2 d4dlea2 d1tgoa2 d3py8a2 d1kfsa2 d2py5a2 d1d5aa2 d1qsta\_  
d2beia1 d4m3sa\_ d1u6ma1 d1ygha\_ d1yk3a1 d3dr6a\_ d1xmta\_ d1z4ea1  
d2ge3a1 d1bo4a\_ d2fiaa1 d2jdca1 d1y9wa1 d3to7a\_ d1wwza1 d2fl4a1  
d2ozua1 d2b5ga\_ d2cy2a1 d2p0wa\_ d1cm0a\_ d4pswa\_ d1yrea1 d1yr0a1  
d1m4ia\_ d2gana1 d1yvka1 d1ghea\_ d2g3aa1 d1y7ra1 d2eulia1 d1q2ya\_  
d2fsra1 d1xeba\_ d2ae6a1 d1cjwa\_ d1qsm\_ d2aj6a1 d1y9ka1 d1i12a\_  
d1vkca\_ d2atra1 d1n71a\_ d2d4pa1 d2fiwa1 d2fe7a1 d1tiqa1 d2ou2a\_  
d1yx0a1 d2fcka1 d1p0ha\_ d2j8ma\_ d2pq8a\_ d1z4ra1 d1s3za1 d1ufha\_  
d1dgsa2 d1fvia1 d1ckma1 d1x9na2 d1xvqa1 d1pn0a2 d3hy2a\_ d2cvba1  
d1o8xa\_ d1lu4a\_ d1we0a1 d2bmxa1 d2a4va1 d1psqa\_ d1xiya1 d1q98a\_  
d1n8ja\_ d1zofa1 d2ggta\_ d3tjja\_ d4je1a1 d1o73a\_ d3s9fa\_ d2zcta\_  
d1qmva\_ d1jfua\_ d2b1ka\_ d5dvba1 d2b5xa1 d2v2ga\_ d1st9a\_ d3tb2a\_  
d41lra\_ d4fh8a1 d1e2ya\_ d1knga\_ d2h30a\_ d1i5ga\_ d2z9sa\_ d2f8aa1  
d1tp9a1 d2b7ka\_ d1nm3a2 d3hvva\_ d2wfca1 d4kcea\_ d1xvwa1 d4gqca1  
d3qpma\_ d4k1fa\_ d1zzoa1 d1gp1a\_ d1prxa\_ d3l21a\_ d2e1da\_ d1to3a1  
d1w3ia\_ d1sfla\_ d1n7ka\_ d1vcva1 d4imea\_ d1wa3a\_ d2ocza1 d1f2ja\_  
d3m16a\_ d2yxga\_ d1ub3a\_ d3a5fa\_ d1fbaa\_ d1l6wa\_ d1xfba1 d1wx0a1  
d1vpxa1 d1ojxa\_ d1mxsa\_ d2a4aa1 d1xkya1 d3cq0a1 d3s1xa\_ d1f05a\_  
d1fdja\_ d3cpra1 d4d2ja\_ d1e88a1 d1l6ja5 d1l6ja4 d1eaka4 d1eaka3  
d1l6ja3 d1h8pa1 d1etha2 d1w52x1 d2ppla1 d1hpla2 d1lpbb2 d2oxea1  
d1bu8a2 d1rpla2 d1ys1x\_ d4hs9a\_ d1ispa\_ d1ku0a\_ d3qmma\_ d1bn1a\_  
d1dy2a\_ d1gyta2 d1lgya\_ d4l3wa\_ d1l1fa\_ d1gz7a\_ d1lukca\_ d1c4xa\_  
d1jlia\_ d2rhwa\_ d3ia2a\_ d1a88a\_ d4dgqa1 d1hkha\_ d1zoia\_ d3zxha\_  
d1cgl\_ d1rm8a\_ d1eaka2 d1hy7a\_ d2jsda\_ d1cxva\_ d1hv5a\_ d3p0ya1  
d1igra1 d1igra2 d1n8yc2 d1m6ba2 d1m6ba1 d1jx4a2 d3gv5b1 d1t94a2  
d3bq0a2 d1jgta2 d1ofda3 d1ea0a3 d1q15a2 d1ct9a2 d1ao0a2 d1te5a\_  
d1ohfc\_ d2tbvc\_ d1c8nc\_ d1x36a\_ d1smvc\_ d1ng0c\_ d4sbvc\_ d1lopa\_  
d1f2nc\_ d1cixa\_ d1y29a\_ d1v7fa\_ d2jtba\_ d1d1ha\_ d1g9pa\_ d1lupa\_  
d1qk7a\_ d1mb6a\_ d2a2va\_ d1niya\_ d1hvwa\_ d2mpqa\_ d1ie6a\_ d1kqha\_  
d1la4a\_ d2mxoa1 d1d10a\_ d1koza\_ d1qk6a\_ d1emxa\_ d1lqra\_ d1c6wa\_  
d1rmka\_ d1ixta\_ d1eyoa\_ d1fu3a\_ d1glpa\_ d1f3ka\_ d1fyga\_ d1rypd\_  
d1irua\_ d1rypc\_ d3unfk\_ d1rypa\_ d1j2pa\_ d1irui\_ d1j2qh\_ d3unfh\_  
d1m4ya\_ d1rypb\_ d1irul\_ d1irug\_ d1iru2\_ d1q5rh\_ d1rypg\_ d1iruf\_  
d1q5qa\_ d1e94a\_ d1irub\_ d1ryph\_ d3ty6a\_ d1iruj\_ d1iruk\_ d1rype\_  
d1irud\_ d1irue\_ d3mi01\_ d1rypf\_ d1iruh\_ d2z3ba\_ d1iruc\_ d3mka2\_  
d1irul\_ d1ny721 d1a6ca3 d1a6ca2 d1a6ca1 d1pgl22 d1pgl21 d1pgl11  
d1ny711 d1mqta\_ d1d4m3\_ d1fmd3\_ d2mev1\_ g1aym.1 d1ev13\_ d4q4w1\_  
d1r1a3\_ d2x5ia\_ d1rhi1\_ g1r1a.1 g1d4m.1 g1rhi.1 d1b35b\_ d1lopa\_  
d1tme1\_ d4iv1a\_ g1pvc.1 g1fpn.1 d1fpn1\_ d4gb31\_ d1d4m1\_ d1fmd1\_  
d1ev11\_ d2wzr3\_ g1cov.1 d1qqp3\_ g1fmd.1 d2x5ic\_ d1rhi3\_ g1loop.1  
d1hxs1\_ g1hxs.1 d1fpn3\_ d1bev1\_ g2mev.1 d1eah3\_ d1aym1\_ d1pvc3\_

d1qqp1\_ d1zba3\_ d1h8ta\_ d3vbhc\_ g1b35.1 g1bev.1 d1hxs3\_ g1ev1.1  
d1bev3\_ g1tmf.1 d1tmf1\_ d2mev3\_ gleah.1 g1h8t.1 d1eah1\_ d4q4w3\_  
d1r1a1\_ d1aym3\_ d1pvc1\_ d1zba1\_ d1h8tc\_ d1oopc\_ d1tme3\_ g1qqp.1  
d4iv1c\_ g1tme.1 d3ubub\_ d1legia\_ d1qo3c\_ d1v7pa\_ d1tdqb\_ d3ubua\_  
d1c3ab\_ d1h8ua\_ d3bx4b\_ d1t8ca1 d1sb2a1 d1qdda\_ d2ziba1 d3cada\_  
d1byfa\_ d1j34b\_ d1jwia\_ d1jzna\_ d1c3aa\_ d1wmza\_ d3bdwb\_ d1hq8a\_  
d1fifa1 d1dv8a\_ d3hupa\_ d1wk1a1 d1umra\_ d2afpa\_ d3bx4a\_ d1gz2a\_  
d1sl6a\_ d1v7pb\_ d3g8ka\_ d1ixxa\_ d1j34a\_ d1jwib\_ d1g1sa1 d1y17a1  
d1ja3a\_ d1fvub\_ d3bdwa\_ d1sb2b1 d1fvua\_ d1umrc\_ d1oz7a\_ d4m17a\_  
d3cfwa1 d1ypqa1 d1g1ta1 d3fd4a\_ d3l9jc\_ d4dn8a1 d1v4lb\_ d1rdl1\_  
d2msba\_ d1eixa\_ d3exra\_ d2ffca1 d2fdsa1 d3n3ma1 d2czda\_ d1q6oa\_  
d2yyua\_ d1vqta1 d1dbta\_ d3ldva1 d4lt9a1 d3tc7a1 d3hoja\_ d1i4na\_  
d3vnda\_ d3n18a1 d1geqa\_ d3nav1 d4a2ra1 d3tc6a1 d1ujpa\_ d4ijba\_  
d1xcfa\_ d1vc4a\_ d1rd5a\_ d1qopa\_ d3b5va\_ d2r80b\_ d1cqxa1 d1cg5a\_  
d1gcvb\_ d3boma\_ d2h8fb\_ d2raoa\_ d3bj1a\_ d4hrrb\_ d2r50a\_ d3d1kb\_  
d2aalb1 d3zhwa\_ d3hf4b\_ d3gdja\_ d1jebb\_ d3bj1b\_ d1x9fb\_ d1wmub\_  
d1gcva\_ d3bcqb\_ d3d4xb\_ d2dc3a\_ d3hf4a\_ d4yu3a\_ d3k8ba\_ d1qpwb\_  
d2r80a\_ d3bcqa\_ d1v4wa\_ d3wtgb\_ d1j17a\_ d4esaa\_ d1a9we\_ d3d1ab\_  
d1fsla\_ d4h21a\_ d1v4wb\_ d1mwca\_ d1vhba\_ d1jeba\_ d1spgb\_ d1h97a\_  
d1q1fa\_ d1tu9a1 d3d1aa\_ d1hdsb\_ d3hyub\_ d2zfb\_ d3fs4a\_ d1oj6a\_  
d1shrb\_ d4h21b\_ d4yu3b\_ d1spga\_ d3hrwa\_ d3qqra\_ d3at5a\_ d4wchd\_  
d3hyua\_ d1cg5b\_ d1uc3a\_ d1hbra\_ d2raob\_ d1outb\_ d4esab\_ d3gdjb\_  
d3qqqa\_ d1x9fc\_ d3vrfa\_ d1litha\_ d3mkba\_ d3d4xa\_ d3mjpa\_ d1j16a\_  
d3fh9a\_ d1outa\_ d2dc3b\_ d1lit2a\_ d3eoka\_ d3g46a\_ d1qpwa\_ d3vrfb\_  
d1ch4a\_ d1x9fd\_ d1hdsa\_ d2zfb\_ d3mkbb\_ d1or4a\_ d3wtga\_ d1a4fa\_  
d3fh9b\_ d3bomb\_ d3cy5a\_ d3at5b\_ d1x9fa\_ d2oifa\_ d4lmb\_ d1cpcb\_  
d3v57a\_ d1kn1a\_ d1cpca\_ d4f0ta\_ d2vjha\_ d4po5b\_ d1eyxa\_ d1alla\_  
d4f0tb\_ d1b33b\_ d4h0mb\_ d1b33a\_ d2vjhb\_ d4lm6b\_ d2vmlb\_ d1allb\_  
d2vjta\_ d3dbja\_ d2vmla\_ d2vjtb\_ d4f0ub\_ d1f99b\_ d4rmpa1 d1liaa\_  
d1eyxb\_ d2uulb\_ d4lmsb\_ d4f0ua\_ d2bv8a\_ d1f99a\_ d2bv8b\_ d2c71b\_  
d3dbjb\_ d4rmpb1 d1b8da\_ d4h0ma\_ d3v57b\_ d1kn1b\_ d1liab\_ d2uula\_  
d2j96a\_ d1pjqa1 d3gqba2 d1skye3 d1xp8a1 d1tf7a2 d1tf7a1 d1ye8a1  
d2qe7d2 d4blta\_ d4huta\_ d3ltaa2 d4hyya\_ d2i3ba1 d1cr1a\_ d3j9tb2  
d3ntua2 d1vdza1 d2z43a\_ d1e9ra\_ d1nlfa\_ d3ziaa2 d1n0wa\_ d1g6oa\_  
d3ziad2 d3j9ta2 d1pzna2 d3gqbb2 d2xqfa\_ d1ea5a\_ d1f6wa\_ d1dx4a\_  
d1qe3a\_ d1k4ya\_ d4qwwa\_ d2ha2a\_ d1r88a\_ d1sfra\_ d1f0na\_ d4qeka\_  
d3c8da2 d2pbla1 d1jkma\_ d1jjia\_ d1lzl1a\_ d1jjfa\_ d1g19b1 d1gkub2  
d4iuua3 d4bvva\_ d5hpga\_ d3k65a\_ d1ki0a3 d1ki0a2 d1ki0a1 d1a0ha1  
d1pmla\_ d3sp8a3 d2feba1 d2m5ta\_ d1cqqa\_ d1wqsa\_ d5bpea\_ d2ipha\_  
d2bhga1 d3tnta\_ d3sjia\_ d3d23a1 d2fyqa\_ d3tloa\_ d3zvea1 d2hrva\_  
d3q3ya1 d4asha1 d1cg2a1 d1yloa2 d1y7ea2 d1y0ya3 d1lfwa1 d1vixa1  
d1fnoa4 d1vhoa2 d1ysja1 d1vhea2 d1z21a1 d2fvga2 d1vgya1 d1r3na1  
d2grea2 d1xmba1 g1q71.1 d1rtqa\_ d3rp2a\_ glucy.1 d1fuja\_ d2zchp\_  
d3w94a\_ d1si5h\_ d1lo6a\_ g2pka.1 d1cgha\_ d1kigh\_ d1a5ia\_ d3s9ba\_

d1hj8a\_ d1ao5a\_ d2anya\_ d1q3xa1 d1gvza\_ dlazza\_ d4gsoa\_ d2f91a1  
d1iaua\_ d1gdna\_ d1eufa\_ g1fiw.1 d1eq9a\_ d4nfea\_ d2rdla\_ d1spja\_  
d1elva1 d1a7sa\_ d1lekbb\_ d1pfxc\_ d1yc0a\_ d2aiqa\_ g1fiz.1 d1fi8a\_  
d4k60a\_ d4dgja\_ d1mzaa\_ d1op0a\_ d3tjva\_ d1pytd\_ d1sgfg\_ g1gg6.1  
d2eeka\_ g1rtf.1 d1a0ja\_ d3g01a\_ d1pytc\_ d4e7na\_ d1ddja\_ d1z8ga1  
d2hlca\_ d1npma\_ d1brup\_ g1jou.1 d1sgfa\_ d1autc\_ g2hnt.1 g1kdq.1  
d1orfa\_ d3s69a\_ d4crga\_ d1fxya\_ d1bqya\_ d1ra6a\_ d1muka\_ d3gsza\_  
d1khva\_ d1te9a\_ d2xwha\_ d3uqsa\_ d3hkwa\_ d3n6ma\_ d2cjqa\_ d2xyma\_  
d1teba\_ d1te8a\_ d1s48a\_ d1u09a1 d4wfxa\_ d3tyqa\_ d2pgga1 d1m4la\_  
d2bk7a\_ d3fjua\_ d1z5ra1 d1uwya2 d1jqga1 d2c1ca1 d1dtda\_ d1h8la2  
d3lgia\_ d3i77a\_ d2z9ia2 d4nsva\_ d1lcya2 d4jcna\_ d1agja\_ d1os8a\_  
d1hpga\_ d1p3ca\_ d1l1ja\_ d1qtfa\_ d1e69a\_ d1mv5a\_ d3g60a4 g1ii8.1  
d1ewqa2 d1ji0a\_ d1qhla\_ d1v43a3 d2wmfa1 d1vpla\_ d1g2912 d4a82a2  
g1f2t.1 d2d62a1 d3tuic1 d2bbsa1 d3g60a3 d2ixea\_ d1g6ha\_ d1sgwa1  
d2qi9c\_ d3rlfa1 d3b60a1 d3d31a2 d2pzea1 g1xew.1 d1jj7a\_ d1oxxk2  
d2onka1 d1w1wa\_ d1iwea\_ d1qf5a\_ d1vmaa2 d1nija1 d1np6a\_ d2p67a1  
d3ihla\_ d1okkd2 d1lsla2 d1slma2 d1liona\_ d2v40a\_ d3hida\_ d2vo1a1  
d2g0ta1 d1vcoa2 d1j8mf2 d1g3qa\_ d1xjca\_ d1p9ba\_ d1qzxa3 d1ihua2  
d1ihua1 d2qm8a\_ d1dj2a\_ d4ioja\_ d1cp2a\_ d1yrba2 d1hyqa\_ d2m9wa1  
d3dfxa\_ d2i49a\_ d1nnfa\_ d1xvxa\_ d1ursa\_ d1h3da1 d1iuda\_ d4mlva1  
d1twya\_ d3e13x\_ d2nxoa1 d4pfua\_ d3ttma\_ d1elja\_ d2qmwa1 d1us5a\_  
d1y3na1 d1jeta\_ d1uqwa\_ d4f19a1 d2esna2 d3thia\_ d3fasa1 d2uyeb\_  
d2xwva1 d1r9la\_ d2fyia1 d1pb7a\_ d2ozza1 d1sw5a\_ d1nh8a1 d1vr5a1  
d2g29a\_ d1xs5a\_ d3lswa\_ d2z23a\_ d3w9va\_ d3tcha\_ d1q35a\_ d1z7me1  
d3q27a\_ d1p99a\_ d1ve4a1 d2i6ea1 d4mcoa1 d4n8ya\_ d1eu8a\_ d1zbma1  
d1ixca2 d1j1na\_ d1xvya\_ d1y9ua\_ d2z22a1 d1xoca1 d4oera\_ d1wdna\_  
d5f1qa1 d1xt8a1 d1i6aa\_ d4gwoa\_ d4igta1 d1pc3a\_ d4mmpa1 d1o63a\_  
d2czla1 d2onsa2 d4mija1 d1eh3a\_ d3skpa\_ d1dtza1 d1dtza2 d1ieja\_  
d1jnfa2 d1ce2a1 d1b1xa2 d1b1xa1 d1jw1a1 d1jw1a2 d1ryoa\_ d1h76a1  
d1h76a2 d1c4oa1 d2p6ra3 d2p6ra4 d1oywa2 d1wrba1 d1w36b2 d1w36b1  
d1c4oa2 d3bora\_ d1t6na\_ d2eyqa5 d2eyqa3 d2eyqa2 d2zu6a2 d1veca\_  
d1uaaa1 d1w36d1 d2g9na1 d1z3ix2 d2rb4a\_ d1hv8a1 d1hv8a2 d1t5ia\_  
d1w36c2 d2j0sa2 d2j0sa1 d1fuka\_ d3hjha1 d1z5za1 d1qdea\_ d1z63a1  
d1s2ma2 d1s2ma1 d1wp9a1 d1wp9a2 d1gm5a3 d1gm5a4 d3dina4 d3dina3  
d1q0ua\_ d1w36c1 d1z3ix1 d1nkta3 d1nkta4 d1uaaa2 d1w36d2 g1qhh.1  
d2fwra2 d2fwra1 d2fkza\_ d1zujal d1s3qa1 d2fjca1 d1z6om1 d1veia\_  
d4dyya\_ d1jiga\_ d3gvya\_ d2pyba\_ d4cy9a1 d3bvfa1 d1r03a\_ d2cf7a\_  
d1nf4a\_ d1zs3a1 d4iwka\_ d3ka8a\_ d3np0x\_ d1n1qa\_ d1lb3a\_ d4e6ka\_  
d1z6oa1 d2fzfa1 d4dyua\_ d3ge4a\_ d1jgca\_ d4am4a\_ d2z6ma\_ d1ji5a\_  
d1vlga\_ d1lkoa1 d3qz3a\_ d1o9ra\_ d2ffxj\_ d1euma\_ d1yv1a1 d2v2pa\_  
d1j30a\_ d4di0a\_ d1dpsa\_ d1oewa\_ d2qzxa\_ d2asia\_ d1psoe\_ d1miqa\_  
d1smra\_ d2h6ta\_ d1pfza\_ d1izda\_ d3hd8a\_ d1j71a\_ d1dpja\_ d4aa9a\_  
d1t6ex\_ g1b5f.1 g1lya.1 g1htr.1 d1qdma2 d1bxoa\_ d1wkra\_ d1tzsa\_  
d1libqa\_ d2qzwa\_ d1bdqa\_ d3ggta\_ d3ixoa\_ d1mrxa\_ d2haha\_ d1tw7a\_

d4njsa\_ d1sgua\_ d2p3da\_ d1nsoa\_ d3d3ta\_ d2rkfa\_ d1c6ya\_ d2rspa\_  
d3ogpa\_ d3ekwa\_ d2o4na\_ d2j9ja\_ d1baia\_ d3ggua\_ d3lzua\_ d4npua\_  
d4j55a\_ d2r8na\_ d2fxda\_ d2p3ca\_ d4dqea\_ d3ttpa\_ d3t3ca\_ d2p3aa\_  
d2hc0a\_ d2fdda\_ d3mwsa\_ d1um8a\_ d1ixza\_ d1qvra2 d1qvra3 d1qzma\_  
d1sxjc2 d1jr3d2 d2p65a\_ d1l8qa2 d1g8pa\_ d3hu3a3 d1sxjd2 d1njfa\_  
d1in4a2 d1sxja2 d1tuea1 d2ce7a2 d1w5sa2 d1sxjb2 d1d2na\_ d1ny5a2  
d1ofha\_ d2gnoa2 d2a5yb3 d1fnna2 d1u0ja1 d1lv7a\_ d1iqpa2 d2fnaa2  
d1ixsb2 d4gita\_ d1sxje2 d1k8rb\_ d1wgra1 d1ef5a\_ d1wfy1 d1e8ya3  
d1wgya1 d2cs4a1 d1wxma1 d2byea1 d3kh0a1 d2byfa1 d1wxaa1 d1e7ua3  
d4y18a1 d2a16a3 d1wgda1 d1wgga1 d4q5eb\_ d1wjna1 d1se9a\_ d3n3kb\_  
d1wz0a1 d1we6a1 d2m0xa\_ d2gbka\_ d3rt3b1 d1wh3a1 d1sifa\_ d2ekek2  
d4ii2b1 d4hk2a1 d1c3ta\_ d1m94a\_ d1wgha1 d1ttna1 d1j8ca\_ d1wx8a1  
d3v6cb1 d2ma9b\_ d4i6lb1 d1bt0a\_ d2jvca1 d1iyfa\_ d2k1fa\_ d1wxva1  
d1wf9a1 d1t0ya\_ d2io0b2 d1x1ma1 d2gbma\_ d1zw7a1 d2m17a\_ d1ud7a\_  
d1we7a1 d2lwpa\_ d2gbja\_ d1wjua1 d1v6ea1 d1v86a1 d4eewa\_ d1wiaa1  
d4icva\_ d4gu2a\_ d1wx7a1 d1wy8a1 d4hjka1 d2faza1 d1v5oa1 d1g66a\_  
d5ajha1 d2h0ba\_ d2erfa\_ d1h30a2 d1h30a1 d3mw4a1 d1pz7a\_ d2r1ba\_  
d3v64a1 d1d2sa\_ d3bopa1 d3mw3a1 d1okqa1 d2bcgg1 d2bcgg2 d1d5ta1  
d2dara2 d2dara1 d1wyha2 d2dloa2 d1rutx4 d1rutx3 d2cuqa2 d1x4la2  
d1x4la1 d1x3ha2 d1x3ha1 d2d8za1 d1x61a2 d1x6aa1 d1x6aa2 d2cora2  
d2cora1 d1v6ga1 d1v6ga2 d2d8za2 d1x64a1 d1x64a2 d1b8ta1 d2co8a1  
d1x63a2 d2dj7a2 d2dj7a1 d2cu8a2 d2cu8a1 d1g47a2 d1g47a1 d1j2oa1  
d1wyha1 d2dloa1 d1wiga1 d1wiga2 d2cupa2 d2cupa3 d1x68a1 d2d8ya2  
d2d8ya1 d1m3va2 d1x62a1 d1x68a2 d1x61a1 d1b8ta3 d1b8ta2 d2d8xa2  
d2d8xa1 d1x4ka1 d1x4ka2 d2cuqa1 d1m3va1 d2co8a2 d1j2oa2 d1x63a1  
d2cura1 d2cura2 d1x62a2 d1svpa\_ d1mbma\_ d3su6a1 d1cu1a1 d4agka\_  
d1vcpa\_ d1q31a\_ g1n11.1 d3e90b\_ d1ep5a\_ d3u1jb\_ d21j7a\_ d1n4na\_  
d2m8bb1 d2kyqa\_ d3psma\_ d1jkza\_ d1jxca\_ d2g11a\_ d4uj0a\_ d2k4ua\_  
d1hp2a\_ d2lu9a\_ d1baha\_ d2meoa1 d1wm7a\_ d1hlya\_ d1n8ma\_ d1jlza\_  
d1wpda\_ d1c55a\_ d1pvza\_ d1wt7a\_ d1rjia\_ d1wz5a\_ d1m2sa\_ d1pjva\_  
d1c49a\_ d1qkya\_ d2ktca1 d1wmta\_ d1du9a\_ d1j5ja\_ d1rlga\_ d1t0za\_  
d2i61a\_ d1t1ta\_ d1sn4a\_ d1kv0a\_ d2lkba\_ d1npia\_ d1wwna\_ d1pe4a\_  
d2kbbka\_ d2li7a\_ d1djta\_ d2kbha\_ d1dq7a\_ d1sega\_ d1omya\_ d1zywa1  
d1jzaa\_ d2jca\_ d1n9wa1 d1bbua1 d1c0aa1 d1b8aa1 d1l0wa1 d3a74a1  
d1eova1 d1iyjb4 d1iyjb5 d1iyjb3 d1o7ia\_ d4ipca1 d1x3ea\_ d4apva\_  
d1jb7a1 d1jb7a2 d1jb7a3 d3kdfa\_ d1ue1b\_ d1wjja1 d3eiva\_ d1xjva2  
d1xjva1 d2ccza2 d1se8a\_ d1l1oc\_ d1jb7b\_ d1qvca\_ d3ulla\_ d1qzga\_  
d1miua4 d1miua5 d1miua3 d3g48a1 d1gd7a\_ d1mkha\_ d1pyba\_ d1y14b1  
d2nn6i1 d1i94l\_ d2zjra2 d1smxa\_ d2qamc2 d1hh2p1 d2r7da1 d1rl2a2  
d1wfga1 d3bzka4 d1x6oa2 d3a0ja\_ d2j01d2 d2ja9a1 d4q15a\_ d1hr0w\_  
d1luza\_ d2n3sa\_ d2vnud1 d1h95a\_ d1go3e1 d2nn6h1 d2mo1a\_ d1iz6a2  
d1jjga\_ d1e3pa2 d2ix0a3 d2ix0a2 d2lxja\_ d1ueba3 d1ueba2 d2z0sa1  
d1u0la1 d2ix0a1 d2eifa2 d2je6i1 d3i2za1 d2c35b1 d2ahob2 d1t9ha1  
d3i4oa\_ d2qall1 d1jt8a\_ d2nn6g1 d1g6pa\_ d3cama\_ d1i94q\_ d1c9oa\_

d1d7qa\_ d2ba0a1 d2vnud2 d2vnud3 d1khia2 d2qalq1 d1wi5a1 d1xtda2  
d1ny4a\_ d1dzka\_ d4tlja\_ d2a2ua\_ d4wfva\_ d3tlda\_ d4iaxa\_ d3zq3a\_  
d2nnda\_ d1i4ua\_ d1kxoa\_ d1bbpa\_ d1kt7a\_ d1exsa\_ d3s26a1 d1lf7a\_  
d1qfta\_ d4gh7a\_ d1z24a1 d1qabe\_ d1xkia\_ d3bx7a\_ d4iawa1 d1n0sa\_  
d1gkab\_ d3kzaa\_ d2k23a\_ d2l9ca1 d2joza1 d1gm6a\_ d3kffa\_ d3saoa1  
d1e5pa\_ d1yupa1 d1iiua\_ d2a1ka\_ d1je5a\_ d1rpma\_ d2shpa1 d1yfoa\_  
d1l8ka\_ d2ooqa1 d1g4us2 d1lara2 d1lara1 d1wcha\_ d2fh7a2 d2fh7a1  
d1ohea1 d1ohea2 d2f4da\_ d1rxda\_ d2hxpa\_ d1xria\_ d1d5ra2 d1fpza\_  
d3ezza\_ d4y2ea\_ d1i9sa\_ d3azya\_ d3wvja\_ d1upsa1 d1ajoa\_ d2hyka\_  
d1ajka\_ d2vy0a\_ d1o4ya\_ d3o5sa\_ d3d6ea\_ d3atga\_ d1dypa\_ d1umza\_  
d3i4ia\_ d1tdha3 d1q3ba3 d1ee8a3 d1k82a3 g1qmo.1 g1len.1 d3zyra\_  
d1fnya\_ g2ltn.1 d1avba\_ d3usua\_ d1dhkb\_ d1f9ka\_ d1ukga\_ d1g8wa\_  
d1g9fa\_ d1wbfa\_ d3wcsa\_ d1g7ya\_ g1loe.1 d1mvqa\_ d1hq1a\_ d1v6ia\_  
d1dbna\_ d1qnwa\_ d1fx5a\_ d4l8qa\_ d1ioaa\_ d3n35a\_ d3ubra\_ d1qo8a1  
d1d4ca1 d2k3va\_ d1ft5a\_ d1qdba\_ d1m1qa\_ d2j7aa\_ d1h21a\_ d1ogyb\_  
d4fasa\_ d1jnia\_ d1oaha\_ d1sp3a\_ d3h33a\_ d1rwja\_ d19hca\_ d1os6a\_  
d3bxua\_ d3h4na\_ d1i77a\_ d3caoa\_ d1j0pa\_ d2ctha\_ d1duwa\_ d1ofwa\_  
d2e84a\_ d1hh5a\_ d3h34a\_ d1dszb\_ d1a6ya\_ d3cbba\_ d1ynwa1 d1r4ia\_  
d1hcqa\_ d2hana\_ d2hanb\_ d2enval d1kb4b\_ d2n11b\_ d1l01a\_ d1cita\_  
d1adqa1 d1fnga1 d1uvqb1 d1zs8a1 d2vola1 d2vola2 d1mfb12 d2jelh2  
d1uwel2 d3qq4b1 d1kjob\_ d1k5na1 d1osph2 d4odh12 d1low0a1 d1low0a2  
d1bfob2 d3l9ra2 d3jtth1 d2fath2 d4elkb2 d1fn4b2 d2xfxb\_ d1pg7x2  
d1cqka\_ d4k71b2 d1l1k2a1 d1eapb2 d4l1fhg2 d1i4fa1 d2nw2a2 d1kfah2  
d1mhca1 d1h3ua1 d1wejh2 d1h0db2 d1a5fh2 d1kcvh2 d1mjuh2 d1qqda1  
d1kcrh2 d1k8ia1 d3huja2 d2nnab1 d1nfd2 d3mffb2 d1s9va1 d1l1k3h2  
d1q0x12 d1fv1b1 d1neza1 d4rfeb2 d1r3ha1 d1a6tb2 d1kjva1 d1pz5b2  
d1onqa1 d2bc4a2 d1de4a1 d1k8da1 d1tcra2 d1dn0b2 d1nfd2 d2xwtb2  
d1bfoa2 d1mexh2 d1iakb1 d1ypzf2 d4f7ea2 d1q7212 d2fbjh2 d1fe8h2  
d1clzh2 d1fngb1 d1uvqa1 d1vgka1 d1c16a1 d4j12a2 d4x99b2 d1je6a1  
d1q72h2 d1nldh2 d1teth2 d2hmic2 d1i1ca2 d1i1ca1 d1k8ib1 d1q0yh2  
d1kfa12 d3frua1 d1pg7w2 d1u58a1 d1igyb4 d1igyb3 d1hyrc1 d1klub1  
d1deeb2 d1c12b2 d2bc4b2 d2ig2h2 d1kcv12 d3wn5b1 d1l1k2b\_ d1l1k312  
d1mjul2 d1sm3h2 d1q0xh2 d1zvsa1 d1ydpal d1u8ib2 d1ypze2 d1kcu2  
d1op9a\_ d1y01a1 d1letzb1 d1egj11 d2gsib1 d1nj9a1 d4jfh1 d1laqk11  
d1t2ja\_ d1l04h1 d1zvya1 d3v4v11 d4enec1 d1kxtb\_ d5e8ea1 d2pxya\_  
d4weud\_ d1xiwc\_ d2esvd1 d1qnzh\_ d1logae1 d1f4xh1 d4n1hb\_ d3ezjb1  
d3mlw11 d1kfah1 d1letza1 d1b4jh1 d3cfic\_ d4w68a\_ d2arja1 d1ek3a\_  
d2ok011 d1vera\_ d1uwgh1 d1blnb1 d1fpth1 d1rzga1 d2giya1 d4m3kb1  
d1nc2a1 d2nyyd1 d1ncna\_ d1fbih1 d5dxwa\_ d4fqqa1 d1dqdh1 d1jfq11  
d1kelh1 d1faih1 d1frgl1 d1figl1 d4m6n11 d1fo0a\_ d4hxb11 d3b5ga\_  
d3quyd1 d2h9gb1 d1i8kb\_ d2dd8h1 d2ck0h1 d1eaja\_ d4w6wb1 d2a6ib3  
d1t66d1 d2e27h\_ d1ob1b1 d1f11b1 d2v7na1 d1ad0a1 d2xt1b1 d1pskh1  
d4i13b1 d2op411 d1a0q11 d1uwel1 d1za3a1 d1ncb11 d4uu9a\_ d1bm3h1  
d1cloh1 d1nqba2 d1cf8h1 d4y5va\_ d1mhph1 d5anma1 d4cdgc1 d4ldeb\_

d1y0lb1 d2pcpb1 d1z3gl1 d1dfb11 d1fh5h1 d3g5xa1 d1tzib1 d4dn3l1  
d3zhka1 d2b1hh1 d2uyla1 d1f3dh1 d1nj9b1 d2agjh1 d2h1pl1 d1q72h1  
d8fabbl d1ndmb1 d1rjca1 d4u6hb1 d3upca\_ d2fbj11 d1osph1 d1tvda\_  
d2cjev\_ d4fhbd1 d1bd2d1 d1rz7h1 d3nn8a\_ d1blna1 d1knoa1 d1nfdal  
d2bmkb1 d1dq11\_ d1igyb1 d1igfl1 d12e8h1 d3utza1 d1nc2b1 d1rihh1  
d4mwfb1 d4jvpa1 d1mieh1 d1rhfa1 d1fgn11 d1sbs1 d1lp9e1 d1dn0a1  
d4lqfl1 d1iaih1 d1kgcd1 d1mh5b1 d1gpol1 d2g60h3 d1f8tl1 d2jixd1  
d4grwh\_ d1fo0b\_ d1bfob1 d1axsa1 d1u9ka\_ d1nmbh\_ d1h8na1 d1h8na2  
d1jguh1 d4eura1 d3sdy11 d35c8h1 d1w72l1 d1mvub\_ d1i9rh1 d1ob1a1  
d4wenb\_ d1yeeh1 d3ietc1 d1f58h1 d1ad0b1 d1mqk1\_ d1nbvh1 d4b50a\_  
d3r8bb\_ d1baf11 d1mamh1 d4rgne1 d2gsgb\_ d35c8l1 d1bafh1 d1ai1h1  
d2pcpa1 d2fath1 d2x1pa\_ d1orsb1 d1ibgl1 d1shma\_ d1a2yb\_ d1u0qa\_  
d2coqa\_ d1hilb1 d1qfwi\_ d1jv5b\_ d1fn4b1 d5e0qa\_ d1nsnh1 d1plgl1  
d4ocxl1 d1kb5h1 d1rzhf1 d1pg7x1 d2fx7h1 d2oi9c\_ d1l7i11 d3eyva1  
d1d5il1 d4ffyl\_ d1tet11 d1a6wh\_ d1lac6a\_ d3dvfa\_ d1nfdel d1mimh1  
d1ri8a1 d1jhlh\_ d3dura\_ d1fskb1 d1f97a1 d3so3b1 d2ak4d1 d1lp9f1  
d4z7wf1 d1l7th1 d4y5ya\_ d4x7ec1 d1emth1 d1ikfl1 d1nlbh1 d4utal1  
d1bjma1 d1eapb1 d1u6ah1 d2dtgd1 d1kj2b\_ d1xeda1 d1cleh1 d1fgvh\_  
d2bnub1 d2fb4h1 d2dtgb1 d1ktrh\_ d1jpth1 d1qkz11 d4hepg\_ d2atpb1  
d1flrh1 d2hrpl1 d1mvfa\_ d1iaim1 d3k80a1 d2jb5h1 d3zkxc\_ d4grwe\_  
d1it9h1 d1rhhb1 d3w9ec\_ d1e4wh1 d1sy6h1 d2j6eh1 d3qxta\_ d1jglh1  
d1p7ka1 d1tzhb1 d4n8pa1 d1gaf11 d2jelh1 d1wioa2 d4i0cc1 d1cicb1  
d1lmka2 d1lmka1 d1iqwh1 d1orqb1 d1ejoh1 d1jnlh1 d4zg1a\_ d43c9b\_  
d1ggbl1 d1wejh1 d3q6fa1 d1f3dj1 d3c6la1 d1bqlh1 d3p9wb\_ d1a3r11  
d1h0db1 d2uzil\_ d1eo8l1 d1qfwl\_ d1n7ml1 d1igja1 d1c5ch1 d2a9mh\_  
d1rmfh1 d1fj1b1 d4heme\_ d1ccza1 d1a5fh1 d1logad1 d1dlfh\_ d1qa9b\_  
d1vge11 d3qskb\_ d1sjxa\_ d4ozfg1 d1sq2n\_ d1qd0a\_ d1kcvh1 d1c5db1  
d3qcul1 d8faba1 d3bn9d1 d1mjuh1 d4y8dc\_ d7fabh1 d3dvgb1 d1lo0l1  
d1a6tb1 d1gigh1 d1kcrh1 d2hwz11 d1yjdcl d3clfl1 d4krna\_ d1dl7l\_  
d1e6ol1 d1mexh1 d3r0ma\_ d4kkna\_ d1fns11 d1oaqh\_ d1rzia1 d1lucb1  
d1ncwl1 d4b41a\_ d1nfdfl d2mpah1 d2d7tl1 d4grwf\_ d4b5ea\_ d1lk3h1  
d3u79a\_ d4u3xa\_ d1ghfl1 d1bvkb\_ d1mcww1 d1b88a\_ d1jrhh1 d32c2b1  
d4wemb\_ d1dsfh\_ d1op3h1 d1ce1l1 d1iqda1 d1qoka1 d1qoka2 d1qfuh1  
d2crya1 d1ay1h1 d1oaql\_ d3ab0b\_ d1rur11 d1t4kb1 d1bz7b1 d1n0xh1  
d1for11 d1lucb11 d4w6yb\_ d43c9a\_ d2aab11 d1tzia1 d4n1ca\_ d1k6qh1  
d3g9ab\_ d4tvsa1 d1igmh\_ d1pz5b1 d3dx9a1 d3wxwh\_ d1nakh1 d1kcull  
d3eaka\_ d4qlra1 d1cr9l1 d1d9ka\_ d1f4x11 d1deea1 d2i27n2 d1c12a1  
d2orbl1 d1j8hd1 d1mcp11 d1c5da1 d1kenh1 d1bd2e1 d1h5ba\_ d4x7fc1  
d3upaa\_ d1t3fa1 d1indh1 d2dtgc1 d4hc1l1 d1zv5a1 d4wgvb\_ d1uwgl1  
d4f37k1 d1aqkh1 d1vesa\_ d3zkqd\_ d1fpt11 d1lo4l1 d1knob1 d3rrqa\_  
d1ct8b1 d4orz\_ d1mlbb1 d4hgkc1 d1dqdl1 d1bogb1 d4ozhe1 d1dr9a1  
d1i7za1 d1dn0b1 d1kell1 d1rzib1 d1ypzf1 d1wtla\_ d1hkfa\_ d1fail1  
d1figh1 d2vyre\_ d1sjva\_ d1ohqa\_ d1bfoa1 d1pkqb1 d1mjul1 d1b4j11  
d1nsnl1 d2arjb1 d1p4bh\_ d4aj0a\_ d3nn8b\_ d2rcja1 d1f2xk\_ d4v1dd\_



d1adqh1 d2eksa\_ d4k3ga\_ d1jfqh1 dluweh1 d1frgh1 d4gftb\_ dluz8b1  
d4n1ea\_ d1bm3l1 d1clol1 d3mcka1 d2vqla1 d1ae6h1 d4aq1b1 dluj3b1  
d1nbqa1 d1fh5l1 d2ck0l1 d2ywza\_ d1q72l1 d4nxbx\_ d1hila1 d4hzlb1  
d2j88l1 d1zmya1 d1cd0a\_ d1a4ka1 d1pskl1 d1a0qh1 d4krmb\_ d1ncbh1  
d2fbjh1 d1j8he1 d1i3ua\_ d1cf8l1 d1fe8h1 d2p1ya1 d2x89a\_ d1ol0a\_  
d2r0lh1 d1ub5a1 d1dfbh1 d3eyvb1 d4jdvb1 d4p2cg\_ d2gsia1 d2agj11  
d1u3ha1 d2h1ph1 d1rihl1 d1fskc1 d1boga1 d2a77l1 d1ospl1 d1qfoa\_  
d3dwta\_ d2fx7l1 d1rz7l1 d3stba1 d1pkqa1 d1b6da1 d1dzba2 d1dzba1  
d1kj2a\_ d4l1ha\_ d1rzgb1 d1dq1h\_ d12e8l1 d1miel1 d1jmaa\_ d1sbsl1  
d1fgnh1 d1f58l1 d1mqkh\_ d1ndgb1 d3qeg11 d1iail1 d2aw2a1 d1tqbc1  
d3fo2a1 d4dkaa\_ d1f8th1 d2g60l1 d2ywy\_ d1uj3a1 d1yc7a\_ d3bd3a\_  
d4w6xb1 d1nmb1\_ d1i8ka\_ d1rjlb1 d1ypze1 d1p7kb1 d1kxqe\_ d1gpoh1  
d2z4qa1 d1w72h1 d1i9rl1 d4qgya1 d4xt1c\_ d2qqnh1 d1cica1 d3c08h1  
d2cd0a\_ d2bdnh1 d1hnga1 d1maml1 d1nldh1 d1cr9h1 d4lcih1 d3bkyh1  
d3qg7l1 d1ai1l1 d1kxvc\_ d4iosd\_ d1l7ih1 d2x1qa\_ d1ub6b1 d3k74b\_  
d1ibgh1 d1teth1 d1igy1 d1hxma1 d2x6ma\_ d2e7la\_ d5e03a\_ d1qfwm\_  
d2r0kh1 d1igjb1 d1rurh1 d1plgh1 d1mj8h1 d1yuhb1 d3fmg11 d1rzfl1  
d1emt11 d1ad9b1 d1igtb1 d1nlbl1 d1d5ih1 d3k7ua\_ d4ffyh\_ d1bwwa\_  
d3dvga1 d1a6ta1 d1fgvl\_ d4qxgl1 d1mim11 d1jh11\_ d2hffb1 d2hh0l1  
d1qkzh1 d1l7tl1 d1afvh1 d1iaii1 d2cjuh\_ d1um5h1 d2ghwb2 d2ghwb1  
d1kgce1 d2fgwh1 d1ikfh1 d1dvfd\_ d2i24n1 d2xtjb\_ d1za3b1 d2yc1a\_  
d2hh0h1 d2x1oa\_ d1bvka\_ d1rjla1 d5e7ba1 d1igta1 d1il1b1 d2fb4l1  
d1mvua\_ d1jpt11 d32c2a1 d1fvca\_ d1iqdb1 d2hrph1 d2p4ab\_ d4qo1a\_  
d1p2cb1 d1wt5c\_ d1t4ka1 d5c1mb\_ d1it9l1 d1bz7a1 d1b2wh1 d1e4wl1  
d1jnl11 d1yedb1 d1za6b1 d3u7aa\_ d1igfh1 d3gnml1 d1orsa1 d1wejl1  
d1a2ya\_ d1hxmb1 d1gafh1 d2j4wh1 d1pz5a1 d1j05a\_ d1a3rh1 d4fq1l1  
d1qfwh\_ d1eo8h1 d1n7mh1 d4s11a\_ d1kegh1 d5da4a\_ d1iqwl1 d3whxb1  
d1vgeh1 d1deeb1 d1c12b1 d1t2ql1 d1ad9a1 d3gsnb1 d3b2uc1 d1ggbh1  
d1t3fb1 d1nak11 d4ocmc\_ d1lila1 d2v7hb3 d2esve1 d1mcoh1 d2qr0b1  
d2q3aa\_ d1ct8a1 d1kcr11 d2pxyb\_ d2uzih\_ d5c3ld\_ d3durb\_ d1c5cl1  
d2ak4e1 d1dl7h\_ d1xiwd\_ d1mlba1 d1rmfl1 d1i7zb1 d1dlfl\_ d2xa3a\_  
d5bq7b1 d1dqqb1 d3h42l1 d1egjh1 d1kcv11 d1fe8l1 d2j6e11 d1f3rb2  
d1lk3l1 d1sm3h1 d1q0xh1 d1ghfh1 d7fab11 d1igch1 d1lo0h1 d4idla\_  
d5c2bl\_ d1jrh11 d1il1a1 d3zhda1 d4kfzc\_ d1b0wa\_ d1e6oh1 d1mex11  
d4krpb\_ d1fnsh1 d1ncwh1 d4hgma\_ d4eigb1 d4rzca\_ d2mpal1 d4y5xa\_  
d5en2b1 d3lrga1 d4ej1c1 d1rhha1 d1j05b\_ d1forh1 d1q9wb1 d2wzpd\_  
d2aq2a1 d1h0da1 d3revb1 d2ij0c1 d1tzh1 d4m7j11 d1k6ql1 d3b9kc1  
d1igml\_ d3qeua1 d1dsfl\_ d1celh1 d1kcuh1 d1zvha1 d1zvoa1 d1tqbb1  
d1ay1l1 d2qsc11 d2cgrh1 d1nl0h1 d1ken11 d3eo0a1 d4n9ob1 d1n0xl1  
d3k1kc\_ d1c4qa\_ d1prtcl d2wv6d\_ d1prtfl\_ d1ltrd\_ d4l63b1 d1r4pb\_  
d1prtd\_ d1tl0f\_ d2bosa\_ d1prtb1 d2aq2b1 d1ck1a1 d1lenfa1 d1i4pa1  
d1vloa1 d1esfa1 d2g9hd1 d4ohja1 d1klud1 d1bxta1 d1eu3a1 d1ty0a1  
d1fnua1 d2cqva1 d1fhga\_ d2k1ma\_ d2dl2a1 d1biha3 d1biha1 d1biha4  
d3qp3a1 d1glca\_ d1gxea\_ d1cvsc2 d1cvsc1 d1xmwa2 d1m4ka2 d2otpa2

d1biha2 d1rhfa2 d2fcba2 d2fcba1 dlwwbx\_ dlgsma2 dlepfa1 dlepfa2  
d2dava1 dlwaaa\_ d1f97a2 d1x44a1 dlvcaa2 d1fnla2 d1fnla1 d3b5ha2  
d3h8na2 d3h8na1 d1jbjja1 d1jbjja2 d1pd6a\_ d1f2qa2 d1f2qa1 d3cx2a\_  
d1nbqa2 d3b5ha1 d1n26a1 d1xiwb\_ d1xaua\_ d1fltx\_ d2ifga1 d1olla1  
d1olla2 d1cs6a4 d1cs6a3 d1cs6a2 d1cs6a1 d2gw5a2 d1sy6a1 d1xiwa\_  
d1lucta2 d1lucta1 d1ry7b2 d1gl4b\_ d1qz1a3 d1olza1 d2c9aa1 dlwwca\_

**Family-78 (c.67.1.4)**

**Positive dataset contains 18 protein sequences.**

d2cfba1 d3k28a\_ d2bwpa\_ d3lg0a\_ d2fnua\_ d3ou5a\_ dlz7da1 d4msoa\_  
d1sffa\_ d3tqxa\_ d3qboa\_ d3pgya\_ d2dkja\_ dlvefa1 d4wxga\_ d3bs8a\_  
d3gbxa1 dlw23a\_

**Negative dataset contains 4002 protein sequences.**

d4nmwa\_ d1ddla\_ d1e57b\_ d1auyb\_ d1fwxa1 dlibya\_ d1f56a\_ dlbypa\_  
d1azca\_ d1ws8a\_ d3u25a\_ d1cuoa\_ d1lid2a\_ d1rkra\_ d2iaac\_ d4dp1x\_  
d1nwpa\_ d2gima\_ d2i7sa\_ d1qhqa\_ d3ehbb1 d1gyca3 d1hfua2 d1kbva1  
d1kbva2 d1sdda1 d1sdda2 d1gyca1 d1gyca2 d1mzya1 d2bw4a1 d1aoza1  
d1aoza3 d1aoza2 d1kyaa2 d1kyaa3 d1kyaa1 d1mzya2 d4e9sa1 d1sddb1  
d1sddb2 d1hfua1 d1hfua3 d1oela2 d1oela1 d1v10a2 d1v10a3 d1v10a1  
g1f8v.1 d1novc\_ d2bbvc\_ d2y5ia\_ d1qlsa\_ d1psra\_ d3n22a\_ d2egda\_  
d4ggfc\_ d2wcea\_ d2luca\_ d4aqia\_ d3nsia\_ d2lp3a\_ d1j55a\_ d1a4pa\_  
d1nsha\_ d1a3qa1 d1iknc\_ d3brda1 d1p7hl1 d1oy3c\_ d1imhc1 d1zk9a1  
d2cxka1 d2bema\_ d1pama1 d1ea9c1 d1qhoa1 d2fhfa2 d2fhfa1 d1k3ia1  
d1j0ha1 d1cxla1 d2bhua1 d1edqa1 d1f1sa2 d1ut9a2 d1gvia1 d1txka1  
d2phla2 d2phla1 d1fxza2 d1fxza1 d1lrha\_ d1uija1 g1dgw.1 d2v09a\_  
d1uika2 d1uika1 d1dgwa\_ d1ogpa1 d1nepa\_ d1fstb\_ d1ex0a1 d1g0da1  
d2b5ea2 d2b5ea3 d2b5ea1 d2b5ea4 d2kp1a1 d2kp2a1 d1hyua3 d1hyua4  
d1j08a1 d1j08a2 d2bjca1 d2hsga1 d1qpza1 d1ydwa2 d2nvwa2 d1zh8a2  
d1qkia2 d1xeea2 d1tlta2 d1mqta\_ d1d4m3\_ d1fmd3\_ d2mev1\_ g1aym.1  
d1ev13\_ d4q4w1\_ d1r1a3\_ d2x5ia\_ d1rhi1\_ g1r1a.1 g1d4m.1 g1rhi.1  
d1b35b\_ d1loopa\_ d1tme1\_ d4iv1a\_ g1pvc.1 g1fpn.1 d1fpn1\_ d4gb31\_  
d1d4m1\_ d1fmd1\_ d1ev11\_ d2wzr3\_ g1cov.1 d1qqp3\_ g1fmd.1 d2x5ic\_  
d1rhi3\_ g1oop.1 d1hxs1\_ g1hxs.1 d1fpn3\_ d1bev1\_ g2mev.1 d1eah3\_  
d1aym1\_ d1qqp1\_ d1zba3\_ d1h8ta\_ d3vbhc\_ g1b35.1 g1bev.1 d1hxs3\_  
g1ev1.1 d1bev3\_ g1tmf.1 d1tmf1\_ d1b35a\_ d2mev3\_ g1eah.1 g1h8t.1  
d1eah1\_ d4q4w3\_ d1r1a1\_ d1aym3\_ d1pvc1\_ d1zba1\_ d1h8tc\_ d1loopc\_  
d1tme3\_ g1qqp.1 d4iv1c\_ g1tme.1 d1au7a2 d1lic8a2 d2ovga\_ d1sq8a\_  
d1rzsa\_ d3kz3a\_ d3orca\_ d3gpdg2 d2q49a2 d1hdgo2 d2g17a2 d2cvoa2  
d2czca1 d3pwka2 d1obfo2 d1i32a2 d1zyao2 d2pkqo2 d1b7go2 d2hjsa2  
d1cf2o2 d1vkna2 d1nvmb2 d1ux8a\_ d1dlya\_ d4i0va\_ d2bkma\_ d2bmma\_  
d2msya\_ d2djoa1 d2r5za\_ d1au7a1 d1f43a\_ d2lmda1 d1akhb\_ d1s7ea1  
d3nara\_ d1zq3p1 d2craa1 d1mija\_ d4uuta\_ d3a01a\_ d1x58a1 d3rkqa1  
d3cmya1 d2cqxa1 d2da6a1 d1e3oc1 d1fjla\_ d1mh3a1 d1ig7a\_ d1x41a1  
d1wh7a1 d1gt0c1 d2mw8a\_ d1lfup\_ d1x2ma1 d1b72a\_ d1wi3a1 d1jgga\_  
d1wjha1 d1x2na1 d1mnmc\_ d2cuea1 d3k2aa\_ d2hosa\_ d2jwta2 d1pufa\_

d1octc1 d2hi3a\_ d1b8ia\_ d4j19a\_ d3lnqa\_ d1wh5a1 d1b8ib\_ d1fexa\_  
d2cqra1 d1guua\_ d1ug2a1 d2cqqa1 d2ajea1 d4a69c\_ d1h8ac1 d2crga1  
d2iw5b1 d1xc5a1 d2cu7a1 d1wgxa1 d2cjja1 d2ckxa1 d1gvda\_ d6paxa2  
d1k78a1 d1k78a2 d1xg1a1 d1igna1 d1b10a1 d1b10a2 d1d5ya2 d3lv8a\_  
d1s3ga1 d1zaka1 d1s4qa\_ d3tvta2 d1uf9a\_ d1khta\_ d1ckea\_ d1osna\_  
d1p5zb\_ d4tmka\_ d3cm0a\_ d1tmka\_ d1jaga\_ d3h86a\_ d1t0hb\_ d1nn5a\_  
d2h92a\_ d3kb2a1 d2c95a1 d1yj5a2 d1kgda\_ d1ly1a\_ d2ak3a1 d1vyva2  
d1deka\_ d2grja1 d1p3ja1 d1y63a\_ d1e4ya1 d1s96a\_ d3iija1 d1lvga\_  
d1nksa\_ d1vyua2 d4e22a\_ d1qf9a\_ d1jjva\_ d1q3ta\_ d1ki9a\_ d1lw7a2  
d1teva\_ d1kjwa2 d1gsia\_ d2iyva2 d1kaga\_ d1viaa\_ d1e6ca\_ d1g3ma\_  
d1j99a\_ d1t8ta1 d1nsta\_ d1fmja\_ d1zrha\_ d1ls6a\_ d2a3ra\_ d1aqua\_  
d2zptx\_ d3ckla\_ d1teta\_ d1q44a\_ d2gwha\_ d1odfa\_ d1uj2a\_ d4gi7a\_  
d2jeoa1 d1z0ja1 d3umra2 d3gj0a1 d2gaoa1 d1yzga1 d1x3sa1 d1g7sa4  
d1puja\_ d1udxa2 d1kk1a3 d2o52a\_ d1jwyb\_ d1zcaa2 d1zcba2 d2fv8a1  
d2cjwa\_ d3dz8a1 d1xzpa2 d1vg8a\_ d4qxaa\_ d2ew1a1 d1x1ra1 d2bcgy\_  
d3doea1 d3cona\_ d3rega\_ d3wyga\_ d1upta\_ d2b6ha1 d1zd9a1 d1lnza2  
d1r5ba3 d1n0ua2 d1r2qa\_ d2f91a1 d2rhda\_ d3q3jb\_ d3q85a\_ d1efma1  
d1r8qa\_ d2gf9a1 d2akab1 d1ek0a\_ d1z08a1 d2gcoa1 d2dyla2 d4g01b\_  
d2cxxa1 d1svia\_ d3q72a\_ d1ni3a1 d4ac9a4 d2erxa1 d2bmea\_ d1wxqa1  
d2gf0a1 d4ldja1 d1zunb3 d1d5ca\_ d4lv5b\_ d1efca3 d1kmqa\_ d2g6ba1  
d3lrpa\_ d1tada2 d2y8ea\_ d4rd4a1 d1z06a1 d2heia\_ d3a58b\_ d1u01a2  
d1d2ea3 d1zj6a1 d2ocba\_ d3rwoa\_ d1mr3f\_ d2e9sa1 d4u5xa1 d2iwra\_  
d2fn4a1 d3bwdd\_ d2nzja1 d2atva1 d2ksqa\_ d3l43a\_ d1mkya2 d1mkya1  
d1wmsa\_ d1jn3a3 d2rmka\_ d1f6ba\_ d1f60a3 d1gota2 d1jala1 d2fh5b1  
d1g16a\_ d2wblc\_ d1m7ba\_ d1wf3a1 d1t9ha2 d1z6xa1 d1z0aa1 d2fg5a1  
d2a5ja1 d2bcjq2 d1s0ua3 d1ky3a\_ d4y0va\_ d4lhwa\_ d2qmea1 d2atxa1  
d1egaa1 d1ryha\_ d1moza\_ d1nrjb\_ d2erya1 d3bfka\_ d1puia\_ d1fzqa\_  
d3j3az1 d3t5ga\_ d1shza2 d3defa\_ d2f7sa1 d3raba\_ d3tsoa\_ d3aq4a\_  
d2a17a1 d3sfva1 d3bc1a\_ d2ncda\_ d1sdma\_ d3h4sa1 d2heha\_ d2grya\_  
g3kin.1 d1kk8a2 d1br2a2 d1goja\_ d2mysa2 d1lkxa\_ d3t0qa\_ d4db1a1  
d3gbja\_ d1ry6a\_ d1v8ka\_ d2i49a\_ d1nnfa\_ d1xvxa\_ d1ursa\_ d1iuda\_  
d4m1va1 d1twya\_ d3e13x\_ d2nxoa1 d4pfua\_ d3ttma\_ d1elja\_ d2qmwa1  
d1us5a\_ d1y3na1 d1jeta\_ d1luqwa\_ d4f19a1 d2esna2 d3thia\_ d3fasa1  
d2uyeb\_ d2xwva1 d1r91a\_ d2fyia1 d1pb7a\_ d2ozza1 d1sw5a\_ d1nh8a1  
d1vr5a1 d2g29a\_ d1xs5a\_ d3lswa\_ d2z23a\_ d3w9va\_ d3tcha\_ d1q35a\_  
d1z7me1 d3q27a\_ d1p99a\_ d1ve4a1 d2i6ea1 d4mcoa1 d4n8ya\_ d1eu8a\_  
d1zbma1 d1hs1a\_ d1ixca2 d1j1na\_ d1xvya\_ d1y9ua\_ d2z22a1 d1xoca1  
d4oera\_ d1wdna\_ d5f1qa1 d1xt8a1 d1i6aa\_ d4gwoa\_ d4igta1 d1pc3a\_  
d4mmpa1 d1o63a\_ d2cz1a1 d2onsa2 d4mija1 d1kv9a1 d1y4wa1 d3vrda1  
d3vrda2 d1fcdc1 d1h1oa2 d1h1oa1 d1m70a2 d1m70a1 d1ig8a1 d1czan2  
d1czan3 d1czan1 d1ig8a2 d1czan4 d1bg3a4 d1bg3a3 d1bg3a1 d1nira1  
d1zc6a1 d1zbsa1 d1zbsa2 d1zc6a2 d2ch5a2 d2ch5a1 d1zxoa2 d1zxoa1  
d1hroa\_ d4gedb\_ d3zooa\_ d1mz4a\_ d1gu2a\_ d1f1fa\_ d1dvva\_ d1c6ra\_  
d1c75a\_ d1e29a\_ d1gdva\_ d1cnoa\_ d1h32b\_ d1co6a\_ d2bh4x\_ d2aiua\_

d5cytr\_ d1jdl\_ d1i8oa\_ d2zboa\_ d3dmia\_ d1ls9a\_ d1wvec\_ d2yk3a\_  
d3ph2b\_ d1dw0a\_ d5aura\_ d1ql3a\_ d1qn2a\_ d1flca\_ d4zzva\_ d2xspa\_  
d1leg1a\_ d4v20a\_ d1ojja\_ d4ipma1 d1gpia\_ d4csia\_ d3pfza\_ d2yoka\_  
d2nqya\_ d1h4ga\_ d1hixa\_ d1oa2a\_ d1olra\_ d3b7ma\_ d4h7ma1 d3wp3a\_  
d2vgda\_ d1igoa\_ d3zsea\_ d2nlra\_ d3wx5a\_ d1oa3a\_ d1pvxa\_ d1m4wa\_  
d1f5ja\_ d1oa4a\_ d4ixla1 d3sita1 d2ah2a1 d1evsa\_ d1cnt1\_ d1pvhb\_  
d1z7ca\_ d1huwa\_ d1rhga\_ d1f6fa\_ d1f45b\_ d1ilrb\_ d1axia\_ d1letea\_  
d3tgxb\_ d1scfa\_ d2z3qa1 d3qb1a\_ d1hula\_ d1m48a\_ d4nkqb\_ d1leera\_  
d1v7mv\_ d5e4ea\_ d2o27a\_ d3b5ka\_ d2psma1 d4zf7a\_ d3uf5a\_ d4x51a\_  
d1d9ca\_ d4ypgc1 d3oq3a\_ d1lqsl\_ d1n1fa\_ d1aula\_ d1wu3i\_ d3bes1\_  
d3ux9a\_ d2ejca\_ d3muea1 d1lihoa\_ d3q12a1 d3rbaa\_ d2qtra\_ d1nupa\_  
d3l92a\_ d1f9aa\_ d1qjca\_ d2h29a\_ d1vlha\_ d1lw7a1 d1mrza2 d4ruka\_  
d2e17a\_ d1liq0a2 d1irxa2 d1r6ta2 d1ivsa4 d2cyba\_ d1rqga2 d1j09a2  
d2yxna\_ d1f7ua2 d1h3fa1 d2g36a1 d1nzja\_ d1jila\_ d1n3la\_ d1i6la\_  
d1pfva2 d1h3na3 d3n9ia\_ d3sz3a1 d2bk7a\_ d3fjua\_ d1z5ra1 d1kwma1  
d1uwya2 d1jqga1 d2c1ca1 d1dtda\_ d1h8la2 d3sw2a\_ d1moxc\_ d1dx5i3  
d1edmb\_ d1autl2 d1autl1 d1nqlb\_ d1dval1 d1szba2 d1kigl\_ d2y5fl\_  
d1ijqa2 d1gk5a\_ d1gl1sa2 d1nt0a3 d1xdtr\_ d1lmja2 d1lmja1 d1nzia2  
d2wphe\_ d1klil\_ d1pfxl2 d1pfxl1 d1p9ja\_ d1gl1ta2 d1f7ea\_ d4yzub\_  
d1nuba2 d2mgpa1 d1b9wa1 d1b9wa2 d2mgpa2 d1ob1c1 d1n1ia2 d1n1ia1  
d2npra2 d2npra1 d1s5ja2 d1qhta2 d4dlea2 d3py8a2 d1q8ia2 d1kfsa2  
d2py5a2 d1d5aa2 d1pvaa\_ d3fs7a\_ d2pvba\_ d1ttxa\_ d1rwy\_ d2kyfa\_  
d1rk9a\_ d1a75a\_ d1lexra\_ d1tiza1 d1nyaa\_ d1g8ia\_ d1ggwa\_ d1wdcc\_  
d3fwba\_ d1ggza\_ d2o5ga\_ d1ctaa\_ d1m45a\_ d3i5gc\_ d1sl8a\_ d1fpwa\_  
d2scpa\_ d2roaa\_ d4aqra\_ d3pn7b\_ d1br1b\_ d2mysb\_ d1s6ca\_ d1bjfa\_  
d2obha\_ d1jfka\_ d1qv0a\_ d1lkja\_ d2mlfc\_ d2m97a\_ d2d8na\_ d4by5a\_  
d1jbaa\_ d4nqga\_ d1wdcb\_ d2mysc\_ d1j7qa\_ d1s6ia\_ d1uhka2 d1r2ua\_  
d1dtla\_ d3kf9a\_ d3pn7c\_ d1qjta\_ d1fi6a\_ d1c07a\_ d1gjya\_ d1y1xa\_  
d1hqva\_ d1dvia\_ d1df0a1 d1qxp2 d4usla\_ d1sfsa\_ d1wkya2 d1uuqa\_  
d3wh9a\_ d4m1ra\_ d1xyza\_ d4xuya\_ d2je8a5 d4bf7a1 d3cuia\_ d1ur4a\_  
d1qw9a2 d1odza\_ d2vzsa5 d1bqca\_ d2x2ya1 d1hjqa\_ d1qnra\_ d4y7ea1  
d1vjza\_ d4k68a\_ d2v3ga\_ d4hpga\_ d1nofa2 d1nq6a\_ d1h4pa\_ d1aq0a\_  
d3ziza\_ d4bs0a\_ d1lecea\_ d1h1na\_ d1ta3b\_ d1w91a2 d1uhva2 d1us3a2  
d1legza\_ d7a3ha\_ d1tvna1 d3nyda1 d1ghsa\_ d2cyga1 d4xv0a\_ d2c8na2  
d1w32a\_ d3emca\_ d1v6ya1 d1foba\_ d2uwfa1 d2fgla\_ d3niya1 d2c0ha1  
d1rh9a1 d1yq2a5 d1szna2 d1fa2a\_ d1pama4 d5do8a1 d1ea9c3 d1hx0a2  
d2fhfa5 d1qhoa4 d1avaa2 d1m53a2 d4m8ua1 d2gjpa2 d1lwha2 d4howa1  
d1ktba2 d1j0ha3 d3vm5a1 d2x1ia\_ d1wzaa2 d1uasa2 d2diea1 d1mxga2  
d1ht6a2 d1eswa\_ d1liv8a2 d5cpsa\_ d1ud2a2 d1zjaa1 d3gbea1 d1kwga2  
d1wdpa\_ d1gcy2 d1g5aa2 d1hvxa2 d3dhpa2 d2bhua3 d4do4a1 d3qgva1  
d1e43a2 d1g94a2 d2d3na2 d1gjwa2 d1gvia3 d1x1na1 d1r7aa2 d1tz7a1  
d4c7ga2 d2gjxa1 d1jaka1 d1yhta1 d4toqa\_ d1wb0a1 d1w9pa1 d1eoka\_  
d1itxa1 d1kfw1 d1goia2 d1ledqa2 d2gsja\_ d1hjxa1 d1jnda1 d1vf8a1  
d1mixa2 d1e5wa2 d1isna2 d2a16b2 d3syxa1 d1mkea1 d2p8va\_ d1xoda1

dli7aa\_ dlevha\_ dlqc6a\_ dlid1a\_ d2hmta\_ dllssa\_ d2v76a\_ dlwj1a1  
dlaqca\_ dlqqga1 dlntva\_ dln3ha\_ d4dbba\_ d3f0wa1 dlp3ra\_ dlwgua1  
d2cy4a1 d3hqca\_ dlwvha1 dlxr0b1 dlwgqa1 dlw89a1 d2coda1 dlzc3b\_  
dlwg7a1 dlu5ea1 dlv61a1 d2coca1 d2ys1a1 dlw5pa1 dlntya2 dlwjma1  
dlwila1 dlu29a\_ dlxx0a1 dlunqa\_ d2zkmx3 dlfhoa\_ dlw88a1 d2adza1  
dlx1fa1 dlp6sa\_ d2coaa1 dlbtka\_ dlv5ma1 dlfaoa\_ d2x18a\_ dldyna\_  
dlx1ga1 d4kaxb\_ d2j59m1 dlxcga2 dltxda2 dlu5da1 dl dbha2 dlwlha\_  
dlupqa\_ dlv5ua1 dlfoea2 d2fj1a1 dleaza\_ d2dfka2 d2cofa1 dlkz7a2  
d9ldta1 d2ewda3 dlup7a1 d2dfda1 dls6ya1 dlvjta1 d7mdha1 dlhyea1  
dl t2da1 dlojsa3 dlb8pa1 dlldna1 dlhyha1 dlciva1 d2a92a1 dlez4a1  
dli0za1 dly6ja1 dlgv0a1 dlur5a1 dl1lda1 dl obba1 dlw8ba1 dl17da1  
d2dlda1 dlmx3a1 dlygya1 dlqp8a1 dl1i4a1 dlj4aa1 d2naca1 dl npya1  
d3t4ea2 dlo0sa1 d2hk9a2 d2egga2 dlb26a1 dlbvua1 dl gq2a1 dlclda1  
dlleha1 dlgtma1 dleuza1 dl nvtal d3dona2 dledza1 dlgpja2 dlvi2a1  
dlp77a1 dl nyta1 dlb0aa1 dlvl6a1 dlw9la1 dltxga2 d3f47a1 dlmv8a2  
d2pv7a2 dlxc2a3 d2ahra2 d4xiya1 d2f1ka2 dli36a2 dl np3a2 dl1j8a4  
dlteaa3 dlqmgga2 d2i76a2 d2g5ca2 dlwdka3 dl dlja2 d3cuma3 dlkola2  
dlf8fa2 dlqora2 dljqba2 dlvj0a2 dlcdoa2 dlgu7a2 dl d1ta2 dlxa0a2  
d2dm6a2 dljvba2 dl rjwa2 dl1lua2 dlh2ba2 dl tt7a2 dlpiwa2 dlo89a2  
dliz0a2 dle3ja2 dlyb5a2 dl uufa2 dlvj1a2 dle3ia2 d3gpdg1 dlvc2a1  
d2nvwa1 dlu8fo1 dlydwa1 dlhdgo1 d2g17a1 dlcf2o1 d2czca2 dl r0ka2  
dl obfo1 d2cvoa1 dl ebfa1 dlh6da1 dlzh8a1 d2q49a1 dlqkia1 dlj5pa4  
d3pzra1 dl xaaa1 dlvkoa1 dlvm6a3 d3qvsa1 d2pkqo1 dlb7go1 dlgr0a1  
dlp1ja1 dl1lc0a1 dlj0xo1 d3pwka1 d2hjsa1 dlzyao1 dlvkna1 dl t1ta1  
dl nvmbl d3sjua\_ d3ojfa1 dlxu9a1 d2jjya1 dl n7ha\_ dlylpa1 dlh5qa\_  
dljtva\_ d4fs3a\_ d2bkaa1 dlgy8a\_ d2c5aa1 dlulsa\_ dl ooea\_ d2b69a1  
dly5ma1 dl spxa\_ dlaela\_ dl bxka\_ dlydea1 dlgega\_ dlhdoa\_ dlo5ia\_  
dle6ua\_ dl snya1 d2rhca\_ d3zv4a\_ d5ceja\_ d2dlya1 dl fjha\_ d3w8ea\_  
d2fmua1 dl x1ta\_ dl rpna\_ d3ay7a1 dlk2wa\_ dleq2a\_ d2hrba1 d3ruaa\_  
d2ew8a1 d4hwka\_ dl xgka\_ d2bd0a1 dlyo6a1 d2a35a1 d2ntva\_ dlvl8a\_  
dlhdca\_ d4bkua\_ d2ag5a1 d2q45a\_ dl nffa\_ d4iy1a\_ dlzbqa1 dlkewa\_  
dle6a\_ dlja9a\_ d2q46a2 dl iy8a\_ dlcyda\_ d2ptga\_ dlhxha\_ dluzma1  
d3lyla\_ d4m89a\_ d3wyea\_ d2blla1 dlw6ua\_ dl sb8a\_ d2q2va\_ d4nr0a\_  
dle6wa\_ d2gasa\_ d3oiga1 d2bgka1 dlmxha\_ dlvl0a1 dl rkxa\_ dl r6da\_  
dlwmaa1 dle7wa\_ d2c07a1 dl xkqa\_ d3tzha\_ dl g0oa\_ d3lz6a\_ dlqyca\_  
dl edoa\_ dl gz6a\_ dl oc2a\_ dl t2aa\_ dlzema1 d2xoxa\_ dlz45a2 dlgeea\_  
dlp33a\_ d3lt0a\_ d4e6pa\_ d2wyua\_ dl db3a\_ d4q9na\_ dl xhla\_ d4o1ma\_  
dl fmca\_ d2uvda\_ d2gdza1 dl uaya\_ d2z1ma\_ d2o23a2 d2fr1a2 d2fr1a1  
dlqsga\_ dlqyda\_ d4zjua\_ d2a4ka1 dlyb1a\_ dlwvga1 dlyxma1 d3f4ba\_  
dlmg5a\_ dl xg5a1 dl r55a1 d3gboa\_ dl atla\_ dlkufa\_ d4q1la\_ dl quaa\_  
dlypl1a\_ dlwnia\_ d4ekfa\_ d2ckga\_ dl th0a\_ d2bkra\_ d3u1ra1 dl g9ka2  
dlkapp2 dl t3ca\_ dl epwa3 d2a97a\_ d3fiea\_ g1elh.1 d3ioqa\_ dl fh0a\_  
dlo0ea\_ dl khqa\_ dl m6da\_ d2cb5a\_ dlcs8a\_ g8pch.1 dls4va\_ d2pnsa\_  
dlvsna1 dlmira\_ dl iwda\_ d2oula\_ d7pcka\_ d3bwka\_ d3bcna\_ d2p86a\_

d1pvja\_ d1pcia\_ d1gece\_ d1deua\_ d4bs6a\_ d1xkga1 d1cqda\_ d1jqpa2  
d2c0ya\_ d2bdza\_ d3p5ua\_ d2o36a\_ d1zoya1 d1qo8a2 d1d4ca2 d1chua2  
d1jnra2 d1kf6a2 d2jk6a2 d2jk6a1 d1feca1 d1feca2 d1lpfa1 d1lpfa2  
d1xhca1 d1xhca2 d1dxla2 d1dxla1 d1gera2 d1m6ia2 d1onfa2 d3lada2  
d3lada1 d1w4xa1 d1w4xa2 d1gesa2 d1mo9a1 d1xdia1 d1fl2a2 d1fl2a1  
d1fcda1 d1fcda2 d1h6va2 d1h6va1 d1mo9a2 d1gv4a2 d1gv4a1 d2gv8a2  
d2gv8a1 d1aoga1 d1aoga2 d1hyua1 d1ebda1 d1ebda2 d3dk9a1 d1q1ra2  
d1q1ra1 d1gesa1 d1zbfal d2z1ha\_ d2etja1 d3qioa1 d1jl1a\_ d2e41a\_  
d1jl2a\_ d2lsna1 d1lio2a\_ d1uaxa\_ d2yv0x\_ d1mu2a1 d1lekea\_ d1i39a\_  
d1pn0a1 d1reoa1 d1ju2a1 d2f5va1 d3c96a1 d2gmha1 d1pj5a2 d1gpea1  
d1n4wa1 d1k0ia1 d2dw4a2 d2ivda1 d1seza1 d2voua1 d1kdga1 d1s5ja1  
d2hbja2 d2igia\_ d1wlja\_ d1qhta1 d4dlea1 d1tgoa1 d2f96a1 d3tr8a1  
d3mxma\_ d1q8ia1 d1y97a1 d1w0ha\_ d1kfsa1 d2py5a1 d1noya\_ d1d5aa1  
d1yt3a3 d2guia\_ d3mwpal d4kb1a\_ d1liv0a\_ d1nu0a\_ d1b9ra\_ d1offa\_  
d1frra\_ d3wcqa\_ d1e9ma\_ d1l5pa\_ d1wria\_ d1i7ha\_ d3av8a\_ d1czpa\_  
d1rfka\_ d3plma1 d3b2ga\_ d2bt6a2 d3nvva1 d1krha3 d2h88b1 d1n62a2  
d1t3qa2 d1kf6b2 d1zoyb1 d1jq4a\_ d1ffva2 d1dgja2 d1rm6c2 d1k8ka2  
d1k8ka1 d3uleb1 d3i33a2 d3i33a1 d1bupa1 d1dkgd2 d1dkgd1 d4ci6a2  
d1jcfa1 d4a2ba2 d2fxua1 d1yaga2 d4cbua2 d1bupa2 d1r7ha\_ d1faaa\_  
d1wika1 d1xfla\_ d1ttza1 d2f51a1 d1ti3a\_ d1nhoa\_ d1sena\_ d2i4aa\_  
d1ep7a\_ d1zmaa1 d1fo5a\_ d3lefa1 d3diea1 d2yana1 d1z6na1 d1oaza\_  
d3zywa1 d4aj8a\_ d1nm3a1 d4fiwa\_ d1wmja\_ d4hs1a1 d1liloa\_ d1xwaa1  
d1wjka1 d2vm1a\_ d1fb6a\_ d1gh2a\_ d1h75a\_ d1nw2a\_ d1kx5b\_ d3a6na\_  
d4m6ba2 d2nqbd\_ d3wkjd\_ d2yfwe\_ d4h9na\_ d5bnxa\_ d1kx5c\_ d3r45a\_  
d1eqzb\_ d4jjnb\_ d1f66c\_ d1eqza\_ d4wnnb\_ d1kx5a\_ d1u35c1 d1id3a\_  
d2nqbc\_ d1kx5d\_ d1tafa\_ d1bh9b\_ d1tafb\_ d1jfib\_ d1q9ca\_ d1h3ob\_  
d2byka1 d1n1ja\_ d4g92b\_ d1bh9a\_ d1jfia\_ d1h3oa\_ d2bykb1 d1pd212  
d1nhya2 d2a2ra2 d1k0dd2 d1f2ea2 d1gsua2 d1f3ba2 d2fhea2 d2pvqa1  
d1tw9a2 d1oyja2 d1e6ba2 d1k0ma2 d3ik7a1 d4is0a1 d1r5aa2 d1jlva2  
d1m0ua2 d3gtub2 d1z9ha2 d1okta2 d1axda2 d2gsra2 d1tu7a2 d1k3ya2  
d1zgma1 d1b48a2 d1gnwa2 d1gwca2 d2gsta2 d1glqa2 d1oe8a2 d1pn9a2  
d1v2aa2 d1fw1a2 d1duga2 d1g7ea\_ d3h1jd1 d1qusa\_ d2csua1 d3q9ub\_  
d2yv1a1 d3q9na\_ d2d59a\_ d1oi7a1 d2yv2a1 d1euca1 d1y81a1 d1gd6a\_  
d1f6ra\_ d1livma\_ d2gv0a\_ d1iiza\_ d2z2fa\_ d1j8xa\_ d1ghla\_ d1b9oa\_  
d1741a\_ d1691a\_ d2o4wa\_ d1p37a\_ d1k28a3 d1xjta1 d1jtma\_ d2f2qa\_  
d4e97a1 d1mpya2 d1kw3b1 d4ghga1 d1tfza1 d3isqa1 d3isqa2 d1sqia1  
d1sqia2 d1lkda2 d1lkda1 d1mpya1 d1cjxa2 d1cjxa1 d1sp9b2 d1t47a1  
d1t47a2 d1f1ua2 d1sp8a1 d1sp8a2 d1f1ua1 d3ia2a\_ d1a88a\_ d4dgqa1  
d1zoia\_ d1pv8a\_ d1w5qa\_ d2c1ha\_ d1l6sa\_ d1qsta\_ d2beia1 d4m3sa\_  
d1u6ma1 d1ygha\_ d1yk3a1 d3dr6a\_ d1xmta\_ d1z4ea1 d2ge3a1 d1bo4a\_  
d2fiaa1 d2jdca1 d1y9wa1 d3to7a\_ d1wwza1 d2f14a1 d2ozua1 d2b5ga\_  
d2cy2a1 d2p0wa\_ d1cm0a\_ d4pswa\_ d1yrea1 d1yr0a1 d1m4ia\_ d2gana1  
d1yvka1 d1ghea\_ d2g3aa1 d1y7ra1 d2euia1 d1q2ya\_ d2fsra1 d1xeba\_  
d2ae6a1 d1qsma\_ d2aj6a1 d1y9ka1 d1i12a\_ d1vkca\_ d2atra1 d1n71a\_

d2d4pa1 d2fiwa1 d2fe7a1 d1tiqa1 d2ou2a\_ d1yx0a1 d2fcka1 d1p0ha\_  
d2j8ma\_ d2pq8a\_ d1z4ra1 d1s3za1 d1ufha\_ d1c4qa\_ d1prtcl d2wv6d\_  
d1prtfl\_ d1ltrd\_ d4l63b1 d1prtd\_ d1tl0f\_ d2bosa\_ d1prtb1 d3chbd\_  
d1xvqa1 d1pn0a2 d3hy2a\_ d2cvba1 d1o8xa\_ d1we0a1 d2bmxa1 d2a4va1  
d1psqa\_ d1xiya1 d1q98a\_ d1n8ja\_ d1zofa1 d2ggta\_ d3tjja\_ d4je1a1  
d1o73a\_ d3s9fa\_ d2zcta\_ d1qmva\_ d1jfua\_ d2b1ka\_ d5dvba1 d2b5xa1  
d2v2ga\_ d1st9a\_ d3tb2a\_ d4llra\_ d4fh8a1 d1e2ya\_ d1knga\_ d2h30a\_  
d1i5ga\_ d2z9sa\_ d2f8aa1 d1tp9a1 d2b7ka\_ d1nm3a2 d3hvva\_ d2wfca1  
d4kcea\_ d1xvwa1 d4gqca1 d3qpma\_ d4k1fa\_ d1zsoa1 d1gpla\_ d1prxa\_  
d1f74a\_ d3l21a\_ d2e1da\_ d1to3a1 d1w3ia\_ d1sfla\_ d1n7ka\_ d1vcva1  
d4imea\_ d1wa3a\_ d2ocza1 d1f2ja\_ d3m16a\_ d2yxga\_ d1ub3a\_ d3a5fa\_  
d1fbaa\_ d1l6wa\_ d1xfba1 d1wx0a1 d1vpxa1 d1ojxa\_ d1mxsa\_ d2a4aa1  
d1xkya1 d3cq0a1 d3s1xa\_ d1f05a\_ d1fdja\_ d3cpa1 d4d2ja\_ d1e88a1  
d1l6ja5 d1l6ja4 d1eaka4 d1eaka3 d1l6ja3 d1h8pa1 d1ep0a\_ d2pa7a1  
d1wlta1 d1nxma\_ d2c0za1 d1ra6a\_ d1muka\_ d3gsza\_ d1khva\_ d1te9a\_  
d2xwha\_ d3uqsa\_ d3hkwa\_ d3n6ma\_ d2cjqa\_ d2xyma\_ d1teba\_ d1te8a\_  
d1s48a\_ d1u09a1 d4wfxa\_ d3tyqa\_ d2pgga1 d1lgya\_ d4l3wa\_ d1llfa\_  
d1gz7a\_ d1lukca\_ d2hqya1 d2hqya2 d1lrza2 d1ne9a1 d1lrza3 d1c4xa\_  
d1jlia\_ d2rhwa\_ d3groa\_ d1pjaa\_ d1thta\_ d2ftba\_ d1pmpa\_ d2rcqa1  
d4lkpa\_ d1sa8a\_ d1vyfa\_ d1lpja\_ d3vg7a1 d4azqa1 d1o8va\_ d5bvqa\_  
d1p6pa\_ d2qo4a\_ d1opba\_ d1yiva1 d1o1va\_ d4bvma1 d4tkba\_ d4i3ba\_  
d1bwya\_ d1ftpa\_ d1ggl\_a\_ d4gkca\_ d1cbia\_ d3p6da1 d1kqwa\_ d2a0aa1  
d1xwcd1 d3kj4a\_ d1w8aa\_ d2ifga3 d1p9ag\_ d1xkua\_ d3p0ya1 d1igra1  
d1igra2 d1n8yc2 d1n8yc1 d1m6ba2 d1jx4a2 d3gv5b1 d1t94a2 d3bq0a2  
d1h6ta2 d1h6ua2 d2tbvc\_ d1c8nc\_ d1x36a\_ d1smvc\_ d1ng0c\_ d1lopa\_  
d1f2nc\_ d1cixa\_ d1y29a\_ d1v7fa\_ d2jtba\_ d1d1ha\_ d1g9pa\_ d1lupa\_  
d1qk7a\_ d1mb6a\_ d2a2va\_ d1niya\_ d1i25a\_ d1hvwa\_ d2mpqa\_ d1ie6a\_  
d1kqha\_ d1la4a\_ d2mxoa1 d1koza\_ d1qk6a\_ d1emxa\_ d1lqra\_ d1c6wa\_  
d1rmka\_ d1ixta\_ d1eyoa\_ d1cnna\_ d1fu3a\_ d1g1pa\_ d1f3ka\_ d1rypd\_  
d1irua\_ d1rypc\_ d3unfk\_ d1rypa\_ d1j2pa\_ d1irui\_ d1j2qh\_ d3unfh\_  
d1m4ya\_ d1rypb\_ d1irul\_ d1irug\_ d1iru2\_ d1q5rh\_ d1rypg\_ d1g3ka\_  
d1iruf\_ d1q5qa\_ d1e94a\_ d1irub\_ d1ryph\_ d3ty6a\_ d1iruj\_ d1iruk\_  
d1rype\_ d1irud\_ d1irue\_ d3mi01\_ d1rypf\_ d1iruh\_ d2z3ba\_ d1iruc\_  
d3mka2\_ d1irul\_ d1ny722 d1a6ca3 d1a6ca2 d1a6ca1 d1pgl22 d1pgl21  
d1pgl11 d1ny711 d1jgta2 d1ofda3 d1ecfa2 d1q15a2 d1ct9a2 d1ao0a2  
d1te5a\_ d1y14b1 d2nn6i1 d1i941\_ d2zjra2 d1smxa\_ d2qamc2 d1hh2p1  
d2r7da1 d1rl2a2 d1wfga1 d3bzka4 d1x6oa2 d3a0ja\_ d2j01d2 d2ja9a1  
d4q15a\_ d1luza\_ d2n3sa\_ d2vnud1 d1h95a\_ d1go3e1 d2nn6h1 d1ne3a\_  
d2mola\_ d1liz6a2 d1jjga\_ d1e3pa2 d2ix0a3 d2ix0a2 d2lxja\_ d1ueba3  
d1ueba2 d2z0sa1 d1u0la1 d2ix0a1 d2eifa2 d2je6i1 d3i2za1 d2c35b1  
d2ahob2 d1t9ha1 d3i4oa\_ d2qall1 d1jt8a\_ d2nn6g1 d1g6pa\_ d3cama\_  
d1i94q\_ d1c9oa\_ d1d7qa\_ d2ba0a1 d2vnud2 d2vnud3 d1khia2 d2qalq1  
d1wi5a1 d1xtda2 d1ny4a\_ d4w9ta\_ d1jvna1 d4x2ra1 d1ka9f\_ d1qo2a\_  
d4axka1 d1h5ya\_ d4u28a\_ d2y88a\_ d4wd0a\_ d1vzwa1 d1eixa\_ d3exra\_

d2ffca1 d2fdsa1 d3n3ma1 d2czda\_ dlq6oa\_ d2yyua\_ dlvqta1 d3ldva1  
d4lt9a1 d3tc7a1 d3hoja\_ dli4na\_ d3vnda\_ d3nl8a1 d3naval dlv5xa\_  
d4a2ra1 d3tc6a1 dlujpa\_ d4ijba\_ dlxcfa\_ dlvc4a\_ dlrd5a\_ dlqopa\_  
d3b5va\_ d2r80b\_ dlcqxa1 dlcg5a\_ dlgcvb\_ d3boma\_ d2h8fb\_ d2raoa\_  
d3bj1a\_ d4hrrb\_ d2r50a\_ d3d1kb\_ d2aa1b1 d3zhwa\_ d3hf4b\_ d3gdja\_  
dljebb\_ d3bj1b\_ dlx9fb\_ dlwmub\_ dlgcva\_ d3bcqb\_ d3d4xb\_ dlgvha1  
d2dc3a\_ d3hf4a\_ d4yu3a\_ d3k8ba\_ dlqpwb\_ d2r80a\_ d3bcqa\_ dl1v4wa\_  
d3wtgb\_ dljl7a\_ d4esaa\_ d1a9we\_ d3d1ab\_ dlflsa\_ d4h21a\_ dl1v4wb\_  
dlmwca\_ dlvhba\_ dljeba\_ dlspgb\_ dlq1fa\_ dl1tu9a1 d3d1aa\_ dlhdsb\_  
d3hyub\_ d2zfb\_ d3fs4a\_ dl0j6a\_ dlshrb\_ d4h21b\_ d4yu3b\_ dlspga\_  
d3hrwa\_ d3qgra\_ d3at5a\_ d4wchd\_ d3hyua\_ dlcg5b\_ dluc3a\_ dlhbra\_  
d2raob\_ dloutb\_ d4esab\_ d3gdjb\_ d3qqqa\_ dlx9fc\_ d3vrfa\_ dlitha\_  
d3mkba\_ d3d4xa\_ d3mjpa\_ dljl6a\_ d3fh9a\_ dlouta\_ d2dc3b\_ dlit2a\_  
d3eoka\_ d3g46a\_ dlqpwa\_ d3vrfb\_ dlch4a\_ dlx9fd\_ dlhdsa\_ d2zfa\_  
d3mkbb\_ dl0r4a\_ d3wtga\_ d1a4fa\_ d3fh9b\_ d3bomb\_ d3cy5a\_ d3at5b\_  
dlx9fa\_ d2oifa\_ d4lmb\_ dlcpcb\_ d3v57a\_ dlkn1a\_ dlcpca\_ d4f0ta\_  
d2vjha\_ d4po5b\_ dleyxa\_ dlalla\_ d4f0tb\_ dlb33b\_ dlb8db\_ d4h0mb\_  
dlb33a\_ d2vjhb\_ d4lm6b\_ d2vmlb\_ dlallb\_ d2vjta\_ d3dbja\_ d2vmla\_  
d2vjtb\_ d4f0ub\_ dl1f99b\_ d4rmpa1 dl1liaa\_ dleyxb\_ d2uulb\_ d4lmsb\_  
d4f0ua\_ d2bv8a\_ dl1f99a\_ d2bv8b\_ d2c71b\_ d3dbjb\_ d4rmpb1 dlb8da\_  
d4h0ma\_ d3v57b\_ dlkn1b\_ dl1liab\_ d2uula\_ d2j96a\_ dlmtza\_ dlk8qa\_  
d2xqfa\_ dl1f6wa\_ dl1dx4a\_ dlqe3a\_ dlk4ya\_ d4qwwa\_ d2ha2a\_ d2h0ba\_  
d2erfa\_ dl1h30a1 d3mw4a1 dl1pz7a\_ d2r1ba\_ d3v64a1 dl1d2sa\_ d3bopa1  
d3mw3a1 dl0kqa1 dl0kqa2 dl1xm5a\_ dl1xaxa\_ dl1tvia\_ d4iuaa3 d4bvva\_  
d5hpga\_ d3k65a\_ dl1ki0a3 dl1ki0a2 dl1ki0a1 dl1a0ha1 dl1pmla\_ d3sp8a3  
d2feba1 d2m5ta\_ dl1cqqa\_ dl1wqsa\_ d5bpea\_ d2ipha\_ dl1lvoa\_ d2bhga1  
d3tnta\_ d3sjia\_ d3d23a1 d2fyqa\_ d3tloa\_ d3zvea1 d2hrva\_ d3q3ya1  
d4asha1 dl1eh3a\_ d3skpa\_ dl1dtza1 dl1dtza2 dl1ieja\_ dl1jnfa2 dl1jnfa1  
dl1b1xa2 dl1b1xa1 dl1jw1a1 dl1jw1a2 dl1ryoa\_ dl1h76a1 dl1h76a2 d3rp2a\_  
glucy.1 dl1fuja\_ d2zchp\_ d3w94a\_ dl1si5h\_ dl1lo6a\_ g2pka.1 dl1cgha\_  
dl1kigh\_ dl1a5ia\_ d3s9ba\_ dl1hj8a\_ dl1ao5a\_ d2anya\_ dl1q3xa1 dl1gvza\_  
dl1azza\_ d4gsoa\_ d2f91a1 dl1iaua\_ dl1gdna\_ dl1eufa\_ gl1fiw.1 dl1eq9a\_  
d4nfea\_ d2rdla\_ dl1spja\_ dl1elva1 dl1a7sa\_ dl1ekbb\_ dl1pfxc\_ dl1yc0a\_  
d2aiqa\_ gl1fiz.1 dl1fi8a\_ d4k60a\_ d4dgja\_ dl1mzaa\_ dl1lop0a\_ d3tjva\_  
dl1pytd\_ dl1sgfg\_ gl1gg6.1 d2eeka\_ gl1rtf.1 dl1a0ja\_ d3g01a\_ dl1pytc\_  
d4e7na\_ dl1ddja\_ dl1z8ga1 d2hlca\_ dl1nрма\_ dl1brup\_ gl1jou.1 dl1sgfa\_  
dl1autc\_ g2hnt.1 gl1kdq.1 d3s69a\_ d4crga\_ dl1fxya\_ dl1bqya\_ dl1svpa\_  
dl1mbma\_ d3su6a1 dl1cu1a1 d4agka\_ dl1vcpa\_ dl1q31a\_ gl1n11.1 d3e90b\_  
dl1ep5a\_ d3uljb\_ dl1dzka\_ d4tlja\_ d2a2ua\_ d4wfva\_ d3t1da\_ d4iaxa\_  
d3zq3a\_ d2nnda\_ dl1i4ua\_ dl1bbpa\_ dl1kt7a\_ dl1exsa\_ d3s26a1 dl1lf7a\_  
dl1qfta\_ d4gh7a\_ dl1z24a1 dl1qabe\_ dl1xkia\_ dl1ew3a\_ d3bx7a\_ d4iawa1  
dl1n0sa\_ dl1gkab\_ d3kzaa\_ d2k23a\_ d2l9ca1 d2joza1 dl1gm6a\_ d3kffa\_  
d3saoa1 dl1e5pa\_ dl1yupa1 dl1iiua\_ d3lgia\_ d3i77a\_ d2z9ia2 d4nsva\_  
dl1lcya2 d4jcna\_ dl1agja\_ dl1os8a\_ dl1hpga\_ dl1p3ca\_ dl1l1ja\_ dl1qtfa\_



d1e69a\_ d1mv5a\_ d3g60a4 d1ewqa2 d1ji0a\_ d1qhla\_ d1v43a3 d2wmfa1  
d1vpla\_ d1g2912 d4a82a2 g1f2t.1 d2d62a1 d3tuic1 d2bbsa1 d3g60a3  
d2ixea\_ d1g6ha\_ d1sgwa1 d2qi9c\_ d3r1fa1 d3b60a1 d3d31a2 d2pzea1  
g1xew.1 d1jj7a\_ d1oxxk2 d2onka1 d1wlwa\_ d1iwea\_ d1qf5a\_ d1vmaa2  
d1nija1 d1np6a\_ d2p67a1 d3ihla\_ d1ls1a2 d1slma2 d1liona\_ d2v40a\_  
d1dj3a\_ d3hida\_ d2vo1a1 d2g0ta1 d1vcoa2 d1j8mf2 d1g3qa\_ d1xjca\_  
d1p9ba\_ d1qzxa3 d1ihua2 d1ihua1 d2qm8a\_ d1dj2a\_ d4ioja\_ d1cp2a\_  
d1yrba2 d1hyqa\_ d3gqba2 d1skye3 d1xp8a1 d1tf7a2 d1tf7a1 d1ye8a1  
d1skyb3 d2qe7d2 d4blta\_ d4huta\_ d3l1daa2 d4hyya\_ d2i3ba1 d1crla\_  
d3j9tb2 d3ntua2 d1vdza1 d2z43a\_ d1e9ra\_ d1nlfa\_ d3ziaa2 d1n0wa\_  
d1g6oa\_ d3ziad2 d3j9ta2 d1pzna2 d3gqbb2 d1gkub1 d1gkub2 d4ok5a1  
d2bmfa1 d2bmfa2 d1yksa1 d1yksa2 d1jr6a\_ d2qeqa1 d2jlqa1 d1alva2  
d1g8fa3 d1c4oa1 d2p6ra3 d2p6ra4 d1oywa2 d1oywa3 d1wrba1 d1w36b2  
d1w36b1 d1c4oa2 d3bora\_ d1t6na\_ d2eyqa5 d2eyqa3 d2eyqa2 d2zu6a2  
d1veca\_ d1uaaa1 d1w36d1 d2g9na1 d1z3ix2 d2rb4a\_ d1hv8a1 d1hv8a2  
d1t5ia\_ d1w36c2 d2j0sa2 d2j0sa1 d1fuka\_ d3hjha1 d1z5za1 d1qdea\_  
d1z63a1 d1s2ma2 d1s2ma1 d1wp9a1 d1wp9a2 d1gm5a3 d3dina4 d3dina3  
d1q0ua\_ d1w36c1 d1z3ix1 d1nkta3 d1nkta4 d1uaaa2 d1w36d2 g1qhh.1  
d2fwra2 d2fwra1 d3q3ma\_ d1za0a1 d1mxra\_ d2inca\_ d1jk0a\_ d2incb\_  
d1mhyb\_ d3hflb\_ d1mtyb\_ d1r2fa\_ d2uw1a\_ d3n37a\_ d1afra\_ d1oquc\_  
d1syya\_ d1mtyd\_ d2o1za\_ d1uzra\_ d1smsa\_ d2fkza\_ d1zuja1 d1s3qa1  
d2fjca1 d1z6om1 d1veia\_ d4dyya\_ d1jiga\_ d3gvya\_ d2pyba\_ d4cy9a1  
d3bvfa1 d1r03a\_ d2cf7a\_ d1nf4a\_ d1zs3a1 d4iwka\_ d3ka8a\_ d3np0x\_  
d1n1qa\_ d1l1b3a\_ d4e6ka\_ d1z6oa1 d2fzfa1 d4dyua\_ d3ge4a\_ d1jgca\_  
d4am4a\_ d2z6ma\_ d1ji5a\_ d1vlga\_ d1lkoa1 d3qz3a\_ d1o9ra\_ d2ffxj\_  
d1euma\_ d1yv1a1 d2v2pa\_ d1j30a\_ d4di0a\_ d1dpsa\_ d1oewa\_ d2qzxa\_  
d2asia\_ d1psoe\_ d1miqa\_ d2h6ta\_ d1pfza\_ d1izda\_ d3hd8a\_ d1j71a\_  
d1dpja\_ d4aa9a\_ d1t6ex\_ g1b5f.1 g1lya.1 g1htr.1 d1qdma2 d1bxoa\_  
d1wkra\_ d1tzsa\_ d1libqa\_ d2qzwa\_ d1bdqa\_ d3ggta\_ d3ixoa\_ d1mrxa\_  
d2haha\_ d1tw7a\_ d4njsa\_ d1sgua\_ d2p3da\_ d1nsoa\_ d3d3ta\_ d2rkfa\_  
d1c6ya\_ d2rspa\_ d3ogpa\_ d3ekwa\_ d2o4na\_ d2j9ja\_ d1baia\_ d3ggua\_  
d3lzua\_ d4npua\_ d4j55a\_ d2r8na\_ d2fxda\_ d2p3ca\_ d4dqea\_ d3ttpa\_  
d3t3ca\_ d2p3aa\_ d2hc0a\_ d2fdda\_ d3mwsa\_ d1um8a\_ d1lixza\_ d1qvra2  
d1qvra3 d1qzma\_ d1sxjc2 d1jr3d2 d2p65a\_ d1l8qa2 d1g8pa\_ d3hu3a3  
d1sxjd2 d1njfa\_ d1in4a2 d1sxja2 d1tuea1 d2ce7a2 d1w5sa2 d1sxjb2  
d1d2na\_ d1ny5a2 d1ofha\_ d2gnoa2 d2a5yb3 d1fnna2 d1u0ja1 d1lv7a\_  
d1iqpa2 d2fnaa2 d1ixsb2 d4gita\_ d1sxje2 d1g41a\_ d1c11a\_ d4lbqa\_  
d1slta\_ d4no4a\_ d3zsja\_ d3duia\_ d1g86a\_ d1is3a\_ d1qmja\_ d1hlca\_  
d1k8rb\_ d1wgra1 d1wfy1 d1e8ya3 d1wgya1 d1lfda\_ d2cs4a1 d1wxma1  
d2byea1 d3kh0a1 d2byfa1 d1wxaa1 d1e7ua3 d4yl8a1 d2al6a3 d1l7ya\_  
d1wgda1 d1wga1 d4q5eb\_ d1wjna1 d1se9a\_ d3n3kb\_ d1wz0a1 d1we6a1  
d2m0xa\_ d2gbka\_ d3rt3b1 d1wh3a1 d1sifa\_ d2ekek2 d4ii2b1 d4hk2a1  
d1c3ta\_ d1m94a\_ d1wgha1 d1ttna1 d1j8ca\_ d1wx8a1 d3v6cb1 d2ma9b\_  
d4i6lb1 d1bt0a\_ d2jvca1 d1iyfa\_ d2k1fa\_ d1wxva1 d1wf9a1 d1t0ya\_

d2io0b2 d1x1ma1 d2gbma\_ d1zw7a1 d2m17a\_ dlud7a\_ dlwe7a1 d2lwp\_  
d2gbja\_ dlwjua1 d1v6ea1 d1v86a1 d4eewa\_ dlwiaa1 d4icva\_ d4gu2a\_  
d1wx7a1 d1wy8a1 d4hjk1 d2faza1 d1v5oa1 d3ruib\_ d3waob\_ d2r2qa1  
d3m95a\_ d3wana\_ d2a13a1 d2cr5a1 d1wj4a1 d1s3sg\_ d4lu0a\_ d1of8a\_  
d3unda1 d3e9aa1 d1vr6a2 d1n8fa\_ d2qkfa\_ d1d9ea\_ d1o60a\_ d1dszb\_  
d1a6ya\_ d3cbba\_ d1ynwa1 d1r4ia\_ d2hana\_ d2hanb\_ d2enva1 d1kb4b\_  
d2n11b\_ d1l01a\_ d1cita\_ d2dara2 d2dara1 d1wyha2 d2dloa2 d1rutx4  
d1rutx3 d2cuqa2 d1x41a2 d1x41a1 d1x3ha2 d1x3ha1 d2d8za1 d1x61a2  
d1x6aa1 d1x6aa2 d2cora2 d2cora1 d1v6ga1 d1v6ga2 d2d8za2 d1x64a1  
d1x64a2 d1b8ta1 d2co8a1 d1x63a2 d2dj7a2 d2dj7a1 d2cu8a2 d2cu8a1  
d1g47a2 d1g47a1 d1j2oa1 d1wyha1 d2dloa1 d1wiga1 d1wiga2 d2cupa2  
d2cupa3 d1x68a1 d2d8ya2 d2d8ya1 d1m3va2 d1x62a1 d1x68a2 d1x61a1  
d1b8ta3 d1b8ta2 d2d8xa2 d2d8xa1 d1x4ka1 d1x4ka2 d2cuqa1 d1m3va1  
d2co8a2 d1j2oa2 d1x63a1 d2cura1 d2cura2 d1x62a2 d21j7a\_ d1n4na\_  
d2m8bb1 d2kyqa\_ d3psma\_ d1jkza\_ d1jxca\_ d2g11a\_ d1ugla\_ d4uj0a\_  
d2k4ua\_ d1hp2a\_ d21u9a\_ d1baha\_ d2meoa1 d1wm7a\_ d1hlya\_ d1n8ma\_  
d1jlza\_ d1wpda\_ d1c55a\_ d1pvza\_ d1wt7a\_ d1rjia\_ d1wz5a\_ d1m2sa\_  
d1pjva\_ d1qkya\_ d2ktca1 d1wmta\_ d1du9a\_ d1j5ja\_ d1rlga\_ d1t0za\_  
d2i61a\_ d1t1ta\_ d1sn4a\_ d1kv0a\_ d21kba\_ d1npia\_ d1wwna\_ d1pe4a\_  
d2kbka\_ d2li7a\_ d1djta\_ d2kbha\_ d1dq7a\_ d1sega\_ d1omya\_ d1zywa1  
d1jzaa\_ d1iyjb4 d1iyjb5 d1iyjb3 d1o7ia\_ d4ipca1 d1x3ea\_ d4apva\_  
d1jb7a1 d1jb7a2 d1jb7a3 d3kdfa\_ d1ue1b\_ d1wjja1 d3eiva\_ d1xjva2  
d1xjva1 d2ccza2 d1se8a\_ d1l1oc\_ d1jb7b\_ d1qvca\_ d3ulla\_ d1qzga\_  
d1miua4 d1miua5 d1miua3 d3ubub\_ d1legia\_ d1qo3c\_ d1v7pa\_ d1tdqb\_  
d3ubua\_ d1c3ab\_ d1h8ua\_ d3bx4b\_ d1t8ca1 d1sb2a1 d1qdda\_ d2ziba1  
d3cada\_ d1j34b\_ d1jwia\_ d1jzna\_ d1c3aa\_ d1oz7b\_ d1wmza\_ d3bdwb\_  
d1hq8a\_ d1fifa1 d1dv8a\_ d3hupa\_ d1wk1a1 d1umra\_ d2afpa\_ d3bx4a\_  
d1gz2a\_ d1sl6a\_ d1v7pb\_ d3g8ka\_ d1ixxa\_ d1j34a\_ d1jwib\_ d1g1sa1  
d1y17a1 d1ja3a\_ d1fvub\_ d3bdwa\_ d1sb2b1 d1fvua\_ d1umrc\_ d1oz7a\_  
d4m17a\_ d3cfwa1 d1ypqa1 d1g1ta1 d3fd4a\_ d3l9jc\_ d4dn8a1 d1v41b\_  
d1rdl1\_ d2msba\_ d1prtc2 d1prtb2 d3zxha\_ d1cgla\_ d1rm8a\_ d1eaka2  
d2jsda\_ d1cxva\_ d1hv5a\_ d1i76a\_ d1ohea1 d2f4da\_ d1rxda\_ d2hxpa\_  
d1xria\_ d1d5ra2 d1fpza\_ d3ezza\_ d4y2ea\_ d1i9sa\_ d3azy\_ d3wvja\_  
d1upsa1 d1ajoa\_ d2hyka\_ d1ajka\_ d2vy0a\_ d1o4ya\_ d3o5sa\_ d3d6ea\_  
d3atga\_ d1dypa\_ d1umza\_ d3i4ia\_ d1tdha3 d1q3ba3 d1k82a3 g1len.1  
d3zyra\_ d1fnya\_ d1n47a\_ g2ltn.1 d1avba\_ d3usua\_ d1dhkb\_ d1f9ka\_  
d1ukga\_ d1g8wa\_ d1g9fa\_ d1wbfa\_ d3wcsa\_ d1g7ya\_ g1loe.1 d1mvqa\_  
d1hq1a\_ d1v6ia\_ d1dbna\_ d1qnwa\_ d1fx5a\_ d4l8qa\_ d1ioaa\_ d3n35a\_  
d3ubra\_ d1qo8a1 d1d4ca1 d2k3va\_ d1ft5a\_ d1qdba\_ d1m1qa\_ d2j7aa\_  
d1h21a\_ d1ogyb\_ d4fasa\_ d1jnia\_ d1oaha\_ d1sp3a\_ d3h33a\_ d1rwja\_  
d19hca\_ d1os6a\_ d3bxua\_ d3h4na\_ d1i77a\_ d3caoa\_ d1j0pa\_ d2ctha\_  
d1duwa\_ d2e84a\_ d1hh5a\_ d1gyoa\_ d3h34a\_ d1wioa4 d1vcaa1 d1dr9a2  
d1ic1a1 d2d9qb1 d2nxyb2 d1adqa1 d1fnga1 d1uvqb1 d1zs8a1 d2vola1  
d2vola2 d1mfb12 d2jelh2 d1uwel2 d3qq4b1 d1kjvb\_ d1k5na1 d1osph2

d4odh12 d1low0a1 d1low0a2 d1bfob2 d3l9ra2 d3jtth1 d2fath2 d4elkb2  
d1fn4b2 d2xfxb\_ d1pg7x2 d1cqka\_ d4k71b2 d1lk2a1 d1leapb2 d4lfhg2  
d1i4fa1 d2nw2a2 d1kfah2 d1mhca1 d1h3ua1 d1wejh2 d1h0db2 d1a5fh2  
d1kcvh2 d1mjuh2 d1qqda1 d1kcrh2 d1k8ia1 d3huja2 d2nnab1 d1nfd2  
d3mffb2 d1s9va1 d1lk3h2 d1q0xl2 d1fv1b1 d1neza1 d4rfeb2 d1r3ha1  
d1a6tb2 d1kjva1 d1pz5b2 d1onqa1 d2bc4a2 d1de4a1 d1k8da1 d1tcra2  
d1dn0b2 d1nfde2 d2xwtb2 d1bfoa2 d1mexh2 d1iakb1 d1ypzf2 d4f7ea2  
d1q72l2 d2fbjh2 d1fe8h2 d1clzh2 d1fngb1 d1uvqa1 d1vgka1 d1c16a1  
d4j12a2 d4x99b2 d1igtb3 d1je6a1 d1q72h2 d1nldh2 d1teth2 d2hmic2  
d1i1ca2 d1i1ca1 d1k8ib1 d1q0yh2 d1kfa12 d3frua1 d1pg7w2 d1u58a1  
d1igyb4 d1igyb3 d1hyrc1 d1klub1 d1deeb2 d1c12b2 d2bc4b2 d1kcv12  
d3wn5b1 d1lk2b\_ d1lk3l2 d1mjul2 d1sm3h2 d1q0xh2 d1zvsal d1ydpal  
d1u8ib2 d1ypze2 d1kcuh2 d1op9a\_ d1y0la1 d1letzb1 d1legj11 d2gsib1  
d1nj9a1 d4jfh1 d1aqk11 d1t2ja\_ d1l04h1 d1zvya1 d3v4v11 d4enec1  
d1kxtb\_ d5e8ea1 d2pxya\_ d4weud\_ d1xiwc\_ d2esvd1 d1qznh\_ d1logae1  
d1f4xh1 d4n1hb\_ d3ezjb1 d3mlw11 d1kfah1 d1etza1 d1b4jh1 d3cfic\_  
d4w68a\_ d2arja1 d1ek3a\_ d2ok0l1 d1vera\_ d1uwgh1 d1blnb1 d1fpth1  
d1rzga1 d2giya1 d4m3kb1 d1nc2a1 d2nyyd1 d1ncna\_ d1fbih1 d5dxwa\_  
d4fqqa1 d1dqdh1 d1jfq11 d1kelh1 d1faih1 d1frgl1 d1figl1 d4m6n11  
d1fo0a\_ d4hxb11 d3b5ga\_ d3quyd1 d2h9gb1 d1i8kb\_ d2dd8h1 d2ck0h1  
d1eaja\_ d4w6wb1 d2a6ib3 d1t66d1 d2e27h\_ d1ob1b1 d1f11b1 d2v7na1  
d1ad0a1 d2xt1b1 d1pskh1 d4i13b1 d2op4l1 d1a0ql1 d1luwel1 d1za3a1  
d1ncb11 d4uu9a\_ d1bm3h1 d1cloh1 d1nqba2 d1cf8h1 d4y5va\_ d1mhph1  
d5anma1 d4cdgc1 d4ldeb\_ d1y0lb1 d2pcpb1 d1z3gl1 d1dfb11 d1fh5h1  
d3g5xa1 d1tzib1 d4dn3l1 d3zhka1 d2b1hh1 d2uyla1 d1f3dh1 d1nj9b1  
d2agjh1 d2h1pl1 d1q72h1 d8fabb1 d1ndmb1 d1rjca1 d4u6hb1 d3upca\_  
d2fbj11 d1osph1 d1tvda\_ d2cjh\_ d4fhbd1 d1bd2d1 d1rz7h1 d3nn8a\_  
d1blna1 d1knoa1 d1nfdal d2bmkb1 d1dq11\_ d1igyb1 d1igf11 d12e8h1  
d3utza1 d1nc2b1 d1rihh1 d4mwfb1 d4jvpa1 d1mieh1 d1rhfa1 d1fgn11  
d1sbs1 d1lp9e1 d1dn0a1 d4lqf11 d1iaih1 d1kgcd1 d1mh5b1 d1gpol1  
d2g60h3 d1f8t11 d2jixd1 d4grwh\_ d1fo0b\_ d1bfob1 d1axsa1 d1u9ka\_  
d1nmbh\_ d1h8na1 d1h8na2 d1jguh1 d4eura1 d3sdy11 d35c8h1 d1w72l1  
d1mvub\_ d1i9rh1 d1ob1a1 d4wenb\_ d1yeeh1 d3ietc1 d1f58h1 d1ad0b1  
d1mqk1\_ d1nbvh1 d4b50a\_ d3r8bb\_ d1baf11 d1mamh1 d4rgne1 d2gsgb\_  
d35c8l1 d1bafh1 d1ai1h1 d2pcpa1 d2fath1 d2x1pa\_ d1orsb1 d1libgl1  
d1shma\_ d1a2yb\_ d1u0qa\_ d2coqa\_ d1hilb1 d1qfwi\_ d1jv5b\_ d1fn4b1  
d5e0qa\_ d1nsnh1 d1plgl1 d4ocxl1 d1kb5h1 d1rzfh1 d1pg7x1 d2fx7h1  
d2oi9c\_ d1l7il1 d3eyva1 d1d5il1 d4ffyl\_ d1tet11 d1a6wh\_ d1ac6a\_  
d3dvfa\_ d1nfde1 d1mimh1 d1ri8a1 d1jhlh\_ d3dura\_ d1fskb1 d1f97a1  
d3so3b1 d2ak4d1 d1lp9f1 d4z7wf1 d1l7th1 d4y5ya\_ d4x7ec1 d1emth1  
d1ikf11 d1nlbh1 d4utal1 d1bjma1 d1leapb1 d1u6ah1 d2dtgd1 d1kj2b\_  
d1xeda1 d1cleh1 d1fgvh\_ d2bnub1 d2fb4h1 d2dtgb1 d1ktrh\_ d1jpth1  
d1qkz11 d4hepg\_ d2atpb1 d1flrh1 d2hrpl1 d1mvfa\_ d1iaim1 d3k80a1  
d2jb5h1 d3zkxc\_ d4grwe\_ d1it9h1 d1rhhb1 d3w9ec\_ d1e4wh1 d1sy6h1

d2j6eh1 d3qxta\_ d1jglh1 d1p7ka1 d1tzhb1 d4n8pa1 d1gaf11 d2jelh1  
d1wioa2 d4i0cc1 d1cicb1 d1lmka2 d1lmka1 d1iqwh1 d1lorqb1 d1ejoh1  
d1jnlh1 d4zgl1\_ d43c9b\_ d1ggbl1 d1wejh1 d3q6fa1 d1f3dj1 d3c6la1  
d1bqlh1 d3p9wb\_ d1a3r11 d1h0db1 d2uzil\_ d1eo811 d1qfwl\_ d1n7m11  
d1igja1 d1c5ch1 d2a9mh\_ d1rmfh1 d1fj1b1 d4heme\_ d1ccza1 d1a5fh1  
d1ogad1 d1dlfh\_ d1qa9b\_ d1vge11 d3qskb\_ d1sjxa\_ d4ozfg1 d1sq2n\_  
d1qd0a\_ d1kcvh1 d1c5db1 d3qcull d8faba1 d3bn9d1 d1mjuh1 d4y8dc\_  
d7fabh1 d3dvgb1 d1l0011 d1a6tb1 d1gigh1 d1kcrh1 d2hwz11 d1yjdc1  
d3clfl1 d4krna\_ d1d171\_ d1e6o11 d1mexh1 d3r0ma\_ d4kkna\_ d1fnsl1  
d1oaqh\_ d1rzia1 d1ucbh1 d1ncw11 d4b41a\_ d1nfd11 d2mpah1 d2d7t11  
d4grwf\_ d4b5ea\_ d11k3h1 d3u79a\_ d4u3xa\_ d1ghf11 d1bvkb\_ d1mcww1  
d1b88a\_ d1jrhh1 d32c2b1 d4wemb\_ d1dsfh\_ d1op3h1 d1cell1 d1iqda1  
d1qoka1 d1qoka2 d1qfuh1 d2crya1 d1ay1h1 d1oaql\_ d3ab0b\_ d1rur11  
d1t4kb1 d1bz7b1 d1n0xh1 d1for11 d1ucbl1 d4w6yb\_ d43c9a\_ d2aab11  
d1tzia1 d4n1ca\_ d1k6qh1 d3g9ab\_ d4tvsa1 d1igmh\_ d1pz5b1 d3dx9a1  
d3wxwh\_ d1nakh1 d1kcul1 d3eaka\_ d4qlra1 d1cr911 d1d9ka\_ d1f4x11  
d1deea1 d2i27n2 d1c12a1 d2orb11 d1j8hd1 d1mcph1 d1c5da1 d1kenh1  
d1bd2e1 d1h5ba\_ d4x7fc1 d3upaa\_ d1t3fa1 d1indh1 d2dtgc1 d4hc111  
d1zv5a1 d4wgvb\_ d1uwgl1 d4f37k1 d1aqkh1 d1vesa\_ d3zkqd\_ d1fpt11  
d1l0411 d1knob1 d3rrqa\_ d1ct8b1 d4orz\_ d1mlbb1 d4hgkc1 d1dqdl1  
d1bogb1 d4ozhe1 d1dr9a1 d1i7za1 d1dn0b1 d1kell1 d1rzb1 d1ypzf1  
d1wtla\_ d1hkfa\_ d1fail1 d1figh1 d2vyre\_ d1sjva\_ d1ohqa\_ d1bfoa1  
d1pkqb1 d1mjul1 d1b4j11 d1nsl1 d2arjb1 d1p4bh\_ d4aj0a\_ d3nn8b\_  
d2rcja1 d1f2xk\_ d4v1dd\_ d1adqh1 d2eksa\_ d4k3ga\_ d1jfqh1 d1uweh1  
d1frgh1 d4gftb\_ d1uz8b1 d4n1ea\_ d1bm311 d1clo11 d3mcka1 d2vq1a1  
d1ae6h1 d4aq1b1 d1uj3b1 d1nbqa1 d1fh511 d2ck011 d2ywza\_ d1q7211  
d4nxbx\_ d1hila1 d4hz1b1 d2j8811 d1zmya1 d1cd0a\_ d1a4ka1 d1psk11  
d1a0qh1 d4krmb\_ d1ncbh1 d2fbjh1 d1j8he1 d1i3ua\_ d1cf811 d1fe8h1  
d2p1ya1 d1eeqa\_ d2x89a\_ d1o10a\_ d2r01h1 d1ub5a1 d1dfbh1 d3eyvb1  
d4jdvb1 d4p2cg\_ d2gsia1 d2agj11 d1u3ha1 d2h1ph1 d1rih11 d1fskc1  
d1boga1 d2a7711 d1osp11 d1qfoa\_ d3dwta\_ d2fx711 d1rz711 d3stba1  
d1pkqa1 d1b6da1 d1dzba2 d1dzba1 d1kj2a\_ d411ha\_ d1rzgb1 d1dq1h\_  
d12e811 d1mie11 d1jmaa\_ d1sbs11 d1fgnh1 d1f5811 d1mqkh\_ d1ndgb1  
d3qeg11 d1ia111 d2aw2a1 d1tqbc1 d3fo2a1 d4dkaa\_ d1f8th1 d2g6011  
d2ywya\_ d1uj3a1 d1yc7a\_ d3bd3a\_ d4w6xb1 d1nmb1\_ d1i8ka\_ d1rj1b1  
d1ypze1 d1p7kb1 d1kxqe\_ d1gpoh1 d2z4qa1 d1w72h1 d1i9r11 d4qgya1  
d4xt1c\_ d2qqnh1 d1cica1 d3c08h1 d2cd0a\_ d2bdnh1 d1hnga1 d1mam11  
d1nldh1 d1cr9h1 d41cih1 d3bkyh1 d3qg711 d1ai111 d1kxvc\_ d4iosd\_  
d1l7ih1 d2x1qa\_ d1ub6b1 d3k74b\_ d1ibgh1 d1teth1 d1igya1 d1hxma1  
d2x6ma\_ d2e71a\_ d5e03a\_ d1qfwm\_ d2r0kh1 d1igjb1 d1rurh1 d1plgh1  
d1mj8h1 d1yuhb1 d3fmg11 d1rzf11 d1emt11 d1ad9b1 d1igtb1 d1nlb11  
d1d5ih1 d3k7ua\_ d4ffyh\_ d1bwwa\_ d3dvga1 d1a6ta1 d1fgvl\_ d4qxgl1  
d1mim11 d1jh11\_ d2hffb1 d2hh011 d1qkzh1 d1l7t11 d1afvh1 d1iaii1  
d2cjuh\_ d1um5h1 d2ghwb2 d2ghwb1 d1kgce1 d2fgwh1 d1ikfh1 d1dvfd\_

d2i24n1 d2xtjb\_ d1za3b1 d2yc1a\_ d2hh0h1 d2x1oa\_ d1bvka\_ d1rjla1  
d5e7ba1 d1igta1 d1i11b1 d2fb4l1 d1mvua\_ d1jptl1 d32c2a1 d1fvca\_  
d1iqdb1 d2hrph1 d2p4ab\_ d4qo1a\_ d1p2cb1 d1wt5c\_ d1t4ka1 d5c1mb\_  
d1it9l1 d1bz7a1 d1b2wh1 d1e4wl1 d1jnl11 d1yedb1 d1za6b1 d3u7aa\_  
d1igfh1 d3gnml1 d1orsa1 d1wejl1 d1a2ya\_ d1hxmb1 d1gafh1 d2j4wh1  
d1pz5a1 d1j05a\_ d1a3rh1 d4fq1l1 d1qfwh\_ d1eo8h1 d1n7mh1 d4s11a\_  
d1kegh1 d5da4a\_ d1iqwl1 d3whxb1 d1vgeh1 d1deeb1 d1c12b1 d1t2ql1  
d1ad9a1 d3gsnb1 d3b2uc1 d1ggbh1 d1t3fb1 d1nakl1 d4ocmc\_ d1lila1  
d2v7hb3 d2esve1 d1mcoh1 d2qr0b1 d2q3aa\_ d1ct8a1 d1kcr11 d2pxyb\_  
d2uzih\_ d5c3ld\_ d3durb\_ d1c5c11 d2ak4e1 d1dl7h\_ d1xiwd\_ d1mlba1  
d1rmfl1 d1i7zb1 d1dlfl\_ d2xa3a\_ d5bq7b1 d1dqqb1 d3h42l1 d1egjh1  
d1kcvl1 d1fe8l1 d2j6e11 d1f3rb2 d1lk3l1 d1sm3h1 d1q0xh1 d1ghfh1  
d7fabl1 d1igch1 d1l00h1 d4idla\_ d5c2b1\_ d1jrh11 d1l11a1 d3zhda1  
d4kfzc\_ d1b0wa\_ d1e6oh1 d1mexl1 d4krpb\_ d1fnsh1 d1ncwh1 d4hgma\_  
d4eigb1 d4rzca\_ d2mpal1 d4y5xa\_ d5en2b1 d3lrga1 d4ej1c1 d1rhha1  
d1j05b\_ d1forh1 d1q9wb1 d2wzpd\_ d2aq2a1 d1h0da1 d3revb1 d2ij0c1  
d1tzh1 d4m7j11 d1k6q11 d3b9kc1 d1igml\_ d3qeua1 d1dsfl\_ d1celh1  
d1kcu1 d1zvha1 d1zvoa1 d1tqbb1 d1ay1l1 d2qsc11 d2cgrh1 d1nl0h1  
d1ken11 d3eo0a1 d4n9ob1 d1n0xl1 d3k1kc\_ d2aq2b1 d1ck1a1 d1enf11  
d1i4pa1 d1vloa1 d1et9a1 d1esfa1 d2g9hd1 d4ohja1 d1klud1 d1bxta1  
d1eu3a1 d1ty0a1 d1fnua1 d2cqva1 d1fhga\_ d2k1ma\_ d2dl2a1 d1biha3  
d1biha1 d1biha4 d3qp3a1 d1g1ca\_ d1gxea\_ d1cvsc2 d1cvsc1 d1xmwa2  
d1m4ka2 d2otpa2 d1biha2 d1rhfa2 d2fcba2 d2fcba1 d1wwbx\_ d1gsma2  
d1epfa1 d1epfa2 d2dava1 d1waaa\_ d1f97a2 d1x44a1 d1vcaa2 d1fnla2  
d1fnla1 d3b5ha2 d3h8na2 d3h8na1 d1jbja1 d1jbja2 d1pd6a\_ d1f2qa2  
d1f2qa1 d3cx2a\_ d1nbqa2 d3b5ha1 d1n26a1 d1xiwb\_ d1xaua\_ d1fltx\_  
d2ifga1 d1olla1 d1olla2 d1cs6a4 d1cs6a3 d1cs6a2 d1cs6a1 d2gw5a2  
d1sy6a1 d1xiwa\_ d1lucta2 d1lucta1 d1ry7b2 d1gl4b\_ d1qz1a3 d1olza1  
d2c9aa1 d1wwca\_

**Family-79 (c.94.1.1)**

**Positive dataset contains 47 protein sequences.**

d2i49a\_ d1xvxa\_ d1iuda\_ d4m1va1 d1twya\_ d3e13x\_ d2nxa1 d4pfua\_  
d3ttma\_ d2qmwa1 d1y3na1 d4f19a1 d2esna2 d3fasa1 d2uyeb\_ d2xwva1  
d2fyia1 d2ozza1 d1sw5a\_ d1vr5a1 d2g29a\_ d1xs5a\_ d3lswa\_ d2z23a\_  
d3w9va\_ d3tcha\_ d1z7me1 d3q27a\_ d1ve4a1 d2i6ea1 d4mcoa1 d4n8ya\_  
d1zba1 d1xvya\_ d1y9ua\_ d2z22a1 d1xoca1 d4oera\_ d5f1qa1 d1xt8a1  
d4gwoa\_ d4igta1 d1pc3a\_ d4mmpa1 d2czla1 d2onsa2 d4mija1

**Negative dataset contains 3994 protein sequences.**

d1m32a\_ d1libja\_ d1c7na\_ d1iuga\_ d4q75a\_ d2bkwa1 d1t3ia\_ d1n8pa\_  
d1qz9a\_ d1jff9a\_ d1eg5a\_ d1p3wa\_ d3kgwa\_ d2ctza1 d1vjoa\_ d2rfva\_  
d1gc0a\_ d1cs1a\_ d1d2fa\_ d2ch1a1 d1qgna\_ d1pffa\_ d1elua\_ d1xfda2  
d1u08a\_ d1lc5a\_ d1b5pa\_ d2ay1a\_ d1bw0a\_ d3pd6a\_ d7aata\_ d2csta\_  
d1j32a\_ d1fg7a\_ d4wlha\_ d1o4sa\_ d1v2da\_ d1gdea\_ d1m6sa\_ d1v72a1  
d1svva\_ d1wsta1 d2f8ja2 d1lk9a\_ d1vp4a1 d1xi9a1 d2gb3a1 d1yaaa\_

d1js3a\_ d3rcha\_ d3k40a\_ d1xkta1 d2hfka\_ d1jmkc\_ d5d3ka\_ d2cfba1  
d1dfoa\_ d1o69a\_ d1bj4a\_ d3k28a\_ d2bwpa\_ d3lg0a\_ d2fnua\_ d3ou5a\_  
d1z7da1 d1b9ha\_ d1iaya\_ d4msoa\_ d1bs0a\_ d1s0aa\_ d1sffa\_ d3tqxa\_  
d1mdoa\_ d3qboa\_ d3pgya\_ d1bjna\_ d2dkja\_ d1ejia\_ d1vefa1 d4wxga\_  
d3bs8a\_ d3gbxa1 d1w23a\_ d1ddla\_ d1auyb\_ d1qnia1 d1libya\_ d1f56a\_  
d1bypa\_ d1azca\_ d1ws8a\_ d3u25a\_ d1cuoa\_ d1id2a\_ d2iaac\_ d4dp1x\_  
d1nwpa\_ d2gima\_ d2i7sa\_ d1qhqa\_ d3ehbb1 d3i2ka1 d1lnsa3 d1mpxa2  
d2dara2 d2dara1 d1wyha2 d2dloa2 d1rutx4 d1rutx3 d2cuqa2 d1x4la2  
d1x4la1 d1x3ha2 d1x3ha1 d2d8za1 d1x61a2 d1x6aa1 d1x6aa2 d2cora2  
d2cora1 d1v6ga1 d1v6ga2 d2d8za2 d1x64a1 d1x64a2 d1b8ta1 d2co8a1  
d1x63a2 d2dj7a2 d2dj7a1 d2cu8a2 d2cu8a1 d1g47a2 d1g47a1 d1j2oa1  
d1wyha1 d2dloa1 d1wiga1 d1wiga2 d2cupa2 d2cupa3 d1x68a1 d2d8ya2  
d2d8ya1 d1m3va2 d1x62a1 d1x68a2 d1x61a1 d1b8ta3 d1b8ta2 d2d8xa2  
d2d8xa1 d1x4ka1 d1x4ka2 d2cuqa1 d1m3va1 d2co8a2 d1x63a1 d2cura1  
d2cura2 d1x62a2 d117ya\_ g1or0.1 g1cp9.1 g1e3a.1 d3sxwa1 d4luka\_  
d1a3qa1 d1iknc\_ d3brda1 d1p7h11 d1oy3c\_ d1imhc1 d1gjia1 d1zk9a1  
d2cxka1 d2bema\_ d1pama1 d1ea9c1 d1qhoa1 d2fhfa2 d2fhfa1 d1k3ia1  
d1j0ha1 d1cxla1 d2bhua1 d1ledqa1 d1f1sa2 d1lut9a2 d1gvia1 d1txka1  
d4alac\_ d1pjwa\_ d1rera1 d1s6na\_ d3uzqb\_ d2phla2 d2phla1 d1fxza2  
d1fxza1 d1lrha\_ d1uija1 g1dgw.1 d2v09a\_ d1uika2 d1uika1 d1dgwa\_  
d1ep0a\_ d2pa7a1 d1wlta1 d2c0za1 d1ktja\_ d1ds6b\_ d1fstb\_ d1tafa\_  
d1bh9b\_ d1tafb\_ d1jfib\_ d1q9ca\_ d1h3ob\_ d2byka1 d1n1ja\_ d4g92b\_  
d1jfia\_ d1h3oa\_ d2bykb1 d1n1jb\_ d1cg2a1 d1yloa2 d1y7ea2 d1y0ya3  
d1vixa1 d1fnoa4 d1vhoa2 d1ysja1 d1vhea2 d1z21a1 d2fvga2 d1vgya1  
d1r3na1 d2grea2 d1xmba1 g1q71.1 d1rtqa\_ d2bjca1 d2hsga1 d1qpza1  
d1efaa1 d1ydwa2 d2nvwa2 d1zh8a2 d1qkia2 d1xeea2 d1t1ta2 d1r0ka3  
d1j5pa3 d1vkoa2 d1vm6a2 d3qvsa2 d1gr0a2 d1p1ja2 d2ovga\_ d1sq8a\_  
d1rzsa\_ d3kz3a\_ d3orca\_ d3gpdg2 d2q49a2 d1hdgo2 d2g17a2 d2cvoa2  
d2czca1 d3pwka2 d1obfo2 d1i32a2 d1zyao2 d2pkqo2 d1b7go2 d2hjsa2  
d1cf2o2 d1vkna2 d1nvmb2 d4lt9a1 d3tc7a1 d3hoja\_ d3vnda\_ d3n18a1  
d1geqa\_ d3naval d1v5xa\_ d4a2ra1 d3tc6a1 d1ujpa\_ d4ijba\_ d1xcfa\_  
d1vc4a\_ d1rd5a\_ d1qopa\_ d3b5va\_ d2msya\_ d2djoa1 d2r5za\_ d1au7a1  
d1f43a\_ d2lmda1 d1akhb\_ d1s7ea1 d3nara\_ d1zq3p1 d2craa1 d1mija\_  
d4uuta\_ d3a01a\_ d1x58a1 d3rkqa1 d3cmya1 d2cqxa1 d2da6a1 d1e3oc1  
d1fjla\_ d1mh3a1 d1ig7a\_ d1x41a1 d1wh7a1 d1gt0c1 d2mw8a\_ d1lfup\_  
d1x2ma1 d1b72a\_ d1wi3a1 d1jgga\_ d1wjha1 d1x2na1 d1mnm\_ d2cuea1  
d3k2aa\_ d2hosa\_ d2jwta2 d1pufa\_ d1octc1 d2hi3a\_ d1b8ia\_ d4j19a\_  
d3lnqa\_ d1wh5a1 d1b8ib\_ d1fexa\_ d2cqra1 d1guua\_ d1lug2a1 d2cqqa1  
d2ajea1 d4a69c\_ d1h8ac1 d2crga1 d2iw5b1 d1xc5a1 d1ofcx1 d2cu7a1  
d1wgxa1 d2cjja1 d2ckxa1 d1gvda\_ d6paxa1 d6paxa2 d1k78a2 d1hlva1  
d1hlva2 d1iufa1 d1mdwa\_ d1ziva1 d1zcm1 d2iu5a1 d1zk8a1 d2g7sa1  
d2fd5a1 d2np5a1 d1z0xa1 d2id6a1 d2d6ya1 d2i10a1 d1vi0a1 d2oi8a1  
d3c07a1 d2ns7a1 d2fq4a1 d2yvea1 d1t33a1 d2o7ta1 d1rкта1 d2np3b1  
d2g7ga1 d2gena1 d2fbqa1 d2g71a1 d2gfna1 d2g3ba1 d2jj7a1 d2hyja1

d1sgma1 d1ui5a1 d2hkua1 d2id3a1 d4jyka1 d1bl0a1 d1bl0a2 d1d5ya1  
d3lv8a\_ d1s3ga1 d1zaka1 d1s4qa\_ d3tvta2 d1uf9a\_ d1khta\_ d1ckea\_  
d1osna\_ d1p5zb\_ d4tmka\_ d3cm0a\_ d1tmka\_ d1jaga\_ d3h86a\_ d1t0hb\_  
d1nn5a\_ d2h92a\_ d3kb2a1 d2c95a1 d1yj5a2 d1kgda\_ d1ly1a\_ d2ak3a1  
d1vyva2 d1deka\_ d2grja1 d1p3ja1 d1y63a\_ d1e4ya1 d1s96a\_ d3iija1  
d1lvga\_ d1nksa\_ d1vyua2 d4e22a\_ d1qf9a\_ d1jjva\_ d1q3ta\_ d1ki9a\_  
d1lw7a2 d1teva\_ d1kjwa2 d1odfa\_ d1uj2a\_ d4gi7a\_ d2jeoa1 d1rz3a\_  
d1z0ja1 d3umra2 d3gj0a1 d2gaoa1 d1yzga1 d1x3sa1 d1g7sa4 d1puja\_  
d1udxa2 d1kk1a3 d2o52a\_ d1jwyb\_ d1zcaa2 d1zcba2 d2fv8a1 d2cjwa\_  
d3dz8a1 d1xzpa2 d1vg8a\_ d4qxaa\_ d2ew1a1 d1x1ra1 d2bcgy\_ d3doea1  
d3cona\_ d3rega\_ d3wyga\_ d1upta\_ d2b6ha1 d1zd9a1 d1lnza2 d1r5ba3  
d1n0ua2 d1r2qa\_ d2f91a1 d2rhda\_ d3q3jb\_ d3q85a\_ d1efma1 d1r8qa\_  
d2gf9a1 d2akab1 d1ek0a\_ d1z08a1 d2gcoa1 d2dy1a2 d4g01b\_ d2cxxa1  
d1svia\_ d3q72a\_ d1ni3a1 d4ac9a4 d2erxa1 d2bmea\_ d1wxqa1 d2gf0a1  
d4ldja1 d1zunb3 d1d5ca\_ d4lv5b\_ d1efca3 d1kmqa\_ d2g6ba1 d3lrpa\_  
d1tada2 d2y8ea\_ d4rd4a1 d1z06a1 d2heia\_ d3a58b\_ d1u01a2 d1d2ea3  
d1zj6a1 d2ocba\_ d3rwoa\_ d1mr3f\_ d2e9sa1 d4u5xa1 d2iwra\_ d2fn4a1  
d3bwdd\_ d2nzja1 d2atva1 d2ksqa\_ d3l43a\_ d1mkya2 d1mkya1 d1wmsa\_  
d1jnva3 d2rmka\_ d1f6ba\_ d1f60a3 d1gota2 d1jala1 d2fh5b1 d1g16a\_  
d2wblc\_ d1m7ba\_ d1wf3a1 d1f5na2 d1t9ha2 d1z6xa1 d1z0aa1 d2fg5a1  
d2a5ja1 d2bcjq2 d1s0ua3 d1ky3a\_ d4y0va\_ d4lhwa\_ d2qmea1 d2atxa1  
d1egaa1 d1ryha\_ d1moza\_ d1nrjb\_ d2erya1 d3bfka\_ d1puia\_ d3j3az1  
d3t5ga\_ d1shza2 d3defa\_ d2f7sa1 d3raba\_ d3tsoa\_ d3aq4a\_ d2a17a1  
d3sfva1 d3bc1a\_ d2ncda\_ d1sdma\_ d3h4sa1 d2heha\_ d2grya\_ g3kin.1  
d1kk8a2 d1br2a2 d1goja\_ d1f9va\_ d2mysa2 d1lkxa\_ d3t0qa\_ d4db1a1  
d3gbja\_ d1ry6a\_ d1s5ja2 d1qhta2 d4dlea2 d1tgoa2 d3py8a2 d1q8ia2  
d1kfsa2 d2py5a2 d1d5aa2 d1k8ka2 d1k8ka1 d3uleb1 d3i33a2 d3i33a1  
d1bupa1 d1dkgd2 d1dkgd1 d4ci6a2 d1jcfa1 d4a2ba2 d2fxua1 d1yaga2  
d4cbua2 d1bupa2 d3vrda1 d3vrda2 d1fcdc2 d1h1oa2 d1h1oa1 d1m70a2  
d1m70a1 d1iqca1 d1eb7a2 d1eb7a1 d1nmla2 d1nmla1 d1nira1 d1qksa1  
d1hroa\_ d4gedb\_ d3zooa\_ d1mz4a\_ d1gu2a\_ d1f1fa\_ d1dvva\_ d1c6ra\_  
d1c75a\_ d1e29a\_ d1gdva\_ d1cnoa\_ d1h32b\_ d1co6a\_ d2bh4x\_ d2aiua\_  
d5cytr\_ d1jdla\_ d1i8oa\_ d2zboa\_ d3dmia\_ d1ls9a\_ d1wvec\_ d2yk3a\_  
d3ph2b\_ d1dw0a\_ d5aura\_ d1qn2a\_ d1f1ca\_ d4zzva\_ d2xspa\_ d1lega1\_  
d4v20a\_ d4ipma1 d1gpia\_ d4csia\_ d3pfza\_ d3ovwa\_ d2yoka\_ d2nqya\_  
d1h4ga\_ d1hixa\_ d1oa2a\_ d3b7ma\_ d4h7ma1 d3wp3a\_ d2vgda\_ d1ligoa\_  
d3zsea\_ d2nlra\_ d3wx5a\_ d1oa3a\_ d1pvxa\_ d1m4wa\_ d1f5ja\_ d1oa4a\_  
d1ks5a\_ d4ix1a1 d2a6za1 d3a4ua\_ d2a6va1 d1evsa\_ d1cnt1\_ d1pvhb\_  
d1z7ca\_ d1huwa\_ d1bgea\_ d1rhga\_ d1f6fa\_ d1f45b\_ d1i1rb\_ d1axia\_  
d1letea\_ d3tgxb\_ d1scfa\_ d2z3qa1 d3qb1a\_ d1hula\_ d1m48a\_ d4nkqb\_  
d1eera\_ d1v7mv\_ d5e4ea\_ d2o27a\_ d3b5ka\_ d2psma1 d4zf7a\_ d3uf5a\_  
d4x51a\_ d1d9ca\_ d4ypgc1 d3oq3a\_ d1lqsl\_ d1n1fa\_ d1lau1a\_ d1wu3i\_  
d3bes1\_ d3ux9a\_ d2ejca\_ d3muea1 d1iho\_ d3q12a1 d4dnxa2 d1m8pa2  
d1v47a2 d1g8fa2 d1x6va2 d3rbaa\_ d2qtra\_ d1nupa\_ d3l92a\_ d1qjca\_

d2h29a\_ d1vlha\_ d1lod6a\_ d1lw7a1 d1mrza2 d4ruka\_ d3wdpp1 d3wq5a\_  
d1gnxa\_ d4gxpa\_ d4hz8a\_ d1e4mm\_ d3aiua\_ d1wcga1 d1qvba\_ d3ahxa\_  
d1v02a\_ d2dgaa\_ d1pbga\_ d1vffa1 d1qoxa\_ d4ha4a\_ d2el7a\_ d1irxa2  
d1r6ta2 d1livsa4 d2cyba\_ d1rqga2 d1j09a2 d2yxna\_ d1f7ua2 d1h3fa1  
d1ffya3 d2g36a1 d1nzja\_ d1jila\_ d1n3la\_ d1i6la\_ d1pfva2 d1h3na3  
d3n9ia\_ d3sz3a1 d3sw2a\_ d1moxc\_ d1dx5i3 d1edmb\_ d1autl2 d1autl1  
d1nqlb\_ d1dva11 d1szba2 d1kigl\_ d2y5fl\_ d1ijqa2 d1gk5a\_ d1g1sa2  
d1nt0a3 d1xdtr\_ d1lmja2 d1lmja1 d1nzia2 d2wphe\_ d1klil\_ d1pfxl2  
d1pfxl1 d1p9ja\_ d1g1ta2 d1f7ea\_ d4yzub\_ d1nuba2 d2y5ia\_ d1qlsa\_  
d1psra\_ d3n22a\_ d2egda\_ d4ggfc\_ d2wcea\_ d2luca\_ d4aqia\_ d3nsia\_  
d2lp3a\_ d1j55a\_ d1a4pa\_ d1k8ua\_ d1pvaa\_ d3fs7a\_ d2pvba\_ d1ttxa\_  
d1rwya\_ d2kyfa\_ d1rk9a\_ d1a75a\_ d1exra\_ d1tiza1 d1nyaa\_ d1g8ia\_  
d1ggwa\_ d1wdcc\_ d3fwba\_ d1ggza\_ d2o5ga\_ d1ctaa\_ d1m45a\_ d3i5gc\_  
d1s18a\_ d1fpwa\_ d2scpa\_ d2roaa\_ d4aqra\_ d3pn7b\_ d1br1b\_ d2mysb\_  
d1s6ca\_ d1bjfa\_ d2obha\_ d1jfka\_ d1jf0a\_ d1qv0a\_ d1lkja\_ d2mlfc\_  
d2m97a\_ d2d8na\_ d4by5a\_ d1jbaa\_ d4nqga\_ d1wdcb\_ d2mysc\_ d1j7qa\_  
d1s6ia\_ d1uhka2 d1r2ua\_ d1dtla\_ d3kf9a\_ d3pn7c\_ d1qjta\_ d1c07a\_  
d5d67d\_ d1tuza\_ d1h8ba\_ d1eg3a1 d1eg3a2 d2zkmx1 d1snla\_ d1y1xa\_  
d1hqva\_ d1dvia\_ d1df0a1 d1qxp2a d4usla\_ d1k94a\_ d1gyca3 d1hfua2  
d1kbva1 d1kbva2 d1sdda1 d1sdda2 d1gyca1 d1gyca2 d1mzya1 d2bw4a1  
d1aoza1 d1aoza3 d1aoza2 d1kyaa2 d1kyaa3 d1kyaa1 d1mzya2 d4e9sa1  
d1sddb1 d1sddb2 d1hfua1 d1hfua3 d1oela2 d1oela1 d1v10a2 d1v10a3  
d1v10a1 d1wkya2 d1uuqa\_ d3wh9a\_ d4mlra\_ d1xyza\_ d4xuya\_ d2je8a5  
d4bf7a1 d3cuia\_ d1ur4a\_ d1qw9a2 d1odza\_ d2vzsa5 d1bqca\_ d2x2ya1  
d1hjqa\_ d1qnra\_ d4y7ea1 d1vjza\_ d4k68a\_ d2v3ga\_ d4hpga\_ d1nofa2  
d1nq6a\_ d1h4pa\_ d1aq0a\_ d3ziza\_ d4bs0a\_ d1ecea\_ d1h1na\_ d1ta3b\_  
d1w91a2 d1ilwa\_ d1uhva2 d1us3a2 d1legza\_ d7a3ha\_ d1tvna1 d3nyda1  
d1ghsa\_ d2cyga1 d4xv0a\_ d2c8na2 d1w32a\_ d3emca\_ d1v6ya1 d1foba\_  
d2uwfa1 d2fgla\_ d3niya1 d2c0ha1 d1rh9a1 d1yq2a5 d1szna2 d1fa2a\_  
d1pama4 d5do8a1 d1ea9c3 d1hx0a2 d2fhfa5 d1qhoa4 d1avaa2 d1m53a2  
d4m8ua1 d2gjpa2 d1lwaha2 d4howa1 d1ktba2 d1j0ha3 d3vm5a1 d2x1ia\_  
d1wzaa2 d1uasa2 d2diea1 d1mxga2 d1ht6a2 d1eswa\_ d1iv8a2 d5cpsa\_  
d1ud2a2 d1zjaa1 d3gbea1 d1kwga2 d1wdpa\_ d1gcya2 d1g5aa2 d1hvxa2  
d3dhpa2 d2bhua3 d4do4a1 d3qgva1 d1e43a2 d1g94a2 d2d3na2 d1gjwa2  
d1gvia3 d1x1na1 d1r7aa2 d1tz7a1 d4toqa\_ d1wb0a1 d1w9pa1 d1itxa1  
d1kfwa1 d1goia2 d1ledqa2 d2gsja\_ d1hjxa1 d1jnda1 d1vf8a1 d1etob\_  
d1umqa\_ d1g2ha\_ d1mixa2 d1e5wa2 d1j19a2 d1isna2 d2a16b2 d3syxa1  
d1mkea1 d2p8va\_ d1xoda1 d1i7aa\_ d1evha\_ d1qc6a\_ d2hmta\_ d1lssa\_  
d1b9ra\_ d1offa\_ d3wcqa\_ d1e9ma\_ d1l5pa\_ d1wria\_ d1i7ha\_ d3av8a\_  
d1czpa\_ d1rfka\_ d3p1ma1 d3b2ga\_ d2bt6a2 d1wgqa1 d1v89a1 d2coda1  
d1zc3b\_ d1wg7a1 d1u5ea1 d1v61a1 d2coca1 d2ys1a1 d1v5pa1 d1ntya2  
d1wjma1 d1wila1 d1u29a\_ d1xx0a1 d1unqa\_ d2zkmx3 d1fhoa\_ d1v88a1  
d2adza1 d1x1fa1 d1p6sa\_ d2coaa1 d1btka\_ d1v5ma1 d1faoa\_ d2x18a\_  
d1dyna\_ d1x1ga1 d4kaxb\_ d2j59m1 d1xcga2 d1txda2 d1u5da1 d1dbha2



d1wlha\_ d1upqa\_ d1v5ua1 d1foea2 d2fjla1 d1eaza\_ d2dfka2 d2cofa1  
d1kz7a2 d9ldta1 d2ewda3 d1up7a1 d2dfda1 d1s6ya1 d1vjta1 d7mdha1  
d1hyea1 d1t2da1 d1ojsa3 d1b8pa1 d1ldna1 d1hyha1 d1civa1 d2a92a1  
d1ez4a1 d1i0za1 d1y6ja1 d1ur5a1 d1llda1 d1obba1 d1v8ba1 d1l7da1  
d2dlda1 d1mx3a1 d1ygya1 d1qp8a1 d1li4a1 d1j4aa1 d2naca1 d1npya1  
d3t4ea2 d1a4ia1 d1o0sa1 d2hk9a2 d2egga2 d1b26a1 d1bvua1 d1gq2a1  
d1clda1 d1leha1 d1gtma1 d1euza1 d1nvt1 d3dona2 d1gpja2 d1vi2a1  
d1p77a1 d1nyta1 d1b0aa1 d1vl6a1 d1v9la1 d1txga2 d3f47a1 d1mv8a2  
d2pv7a2 d1xc2a3 d2ahra2 d4xiya1 d2f1ka2 d1pgja2 d1i36a2 d1np3a2  
d1lj8a4 d1teaa3 d1qmga2 d2i76a2 d2g5ca2 d1wdka3 d1dlja2 d3cuma3  
d1kola2 d1f8fa2 d1qora2 d1jqba2 d1vj0a2 d1cdoa2 d1gu7a2 d1d1ta2  
d1xa0a2 d2dm6a2 d1jvba2 d1rjwa2 d1llua2 d1h2ba2 d1tt7a2 d1piwa2  
d1o89a2 d1iz0a2 d1e3ja2 d1yb5a2 d1uufa2 d1e3ia2 d3gpdg1 d1vc2a1  
d2nvwa1 d1u8fo1 d1ydw1 d1hdgo1 d2g17a1 d1cf2o1 d2czca2 d1r0ka2  
d1obfo1 d2cvoa1 d1ebfa1 d1h6da1 d1i32a1 d1zh8a1 d2q49a1 d1qkia1  
d1j5pa4 d3pzra1 d1xeea1 d1vkoa1 d1vm6a3 d3qvsa1 d2pkqo1 d1b7go1  
d1gr0a1 d1p1ja1 d1lc0a1 d1j0xo1 d3pwka1 d2hjsa1 d1zyao1 d1vkna1  
d1tlt1 d1nvmb1 d3sjua\_ d3ojfa1 d1xu9a1 d2jjya1 d1n7ha\_ d1ylpa1  
d1h5qa\_ d1jtv1\_ d4fs3a\_ d2bkaa1 d1gy8a\_ d2c5aa1 d1ulsa\_ d1ooea\_  
d2b69a1 d1y5ma1 d1spxa\_ d1aela\_ d1bxka\_ d1ydea1 d1gega\_ d1hdoa\_  
d1o5ia\_ d1e6ua\_ d1snya1 d2rhca\_ d3zv4a\_ d5ceja\_ d2d1ya1 d1fjha\_  
d3w8ea\_ d2fmua1 d1x1ta\_ d1rpna\_ d3ay7a1 d1k2wa\_ d1eq2a\_ d2hrba1  
d3ruaa\_ d2ew8a1 d4hwka\_ d1xgka\_ d2bd0a1 d1yo6a1 d2a35a1 d2ntva\_  
d1vl8a\_ d1hdca\_ d4bkua\_ d2ag5a1 d2q45a\_ d1nffa\_ d4iy1a\_ d1zbqa1  
d1kewa\_ d1ek6a\_ d1ja9a\_ d2q46a2 d1iy8a\_ d1cyda\_ d2ptga\_ d1hxha\_  
d1uzma1 d3lyla\_ d4m89a\_ d3weya\_ d2blla1 d1w6ua\_ d1sb8a\_ d2q2va\_  
d4nr0a\_ d1e6wa\_ d2gasa\_ d3oiga1 d2bgka1 d1mxha\_ d1vl0a1 d1rkxa\_  
d1r6da\_ d1wmaa1 d1e7wa\_ d2c07a1 d1xkqa\_ d3tzha\_ d1g0oa\_ d3lz6a\_  
d1qyca\_ d1ledoa\_ d1gz6a\_ d1loc2a\_ d1t2aa\_ d1zema1 d2xoxa\_ d1z45a2  
d1geea\_ d1p33a\_ d3lt0a\_ d4e6pa\_ d2wyua\_ d1db3a\_ d4q9na\_ d1xhla\_  
d4o1ma\_ d1fmca\_ d2uvda\_ d2gdza1 d1uaya\_ d2z1ma\_ d2o23a2 d2fr1a2  
d2fr1a1 d1qsga\_ d4zjua\_ d2a4ka1 d1yb1a\_ d1wvga1 d1yxma1 d3f4ba\_  
d1mg5a\_ d1xg5a1 d3u1ra1 d1g9ka2 d1kapp2 d1k7ia2 d2w0pa\_ d2diaa1  
d2e9ia2 d2e9ja1 d2dj4a1 d2eeba1 d2diba1 d2dmba1 d2dmca1 d2d7oa1  
d2ee6a1 d2d7pa1 d2eeaa1 d2di8a1 d1wlha1 d2d7na1 d2nqca\_ d2d7ma1  
d2dica1 d3cnka\_ d2k3ta1 d2eeca1 d1qfha2 d2bp3a1 d1v05a\_ d2ee9a1  
d2eeda1 d2di9a1 d3ioqa\_ d1fh0a\_ d1o0ea\_ d1khqa\_ d2cb5a\_ d1cs8a\_  
g8pch.1 d1s4va\_ d2pnsa\_ d1vsna1 d1mira\_ d1iwda\_ d2oula\_ d7pcka\_  
d3bwka\_ d3bcna\_ d2p86a\_ d1pvja\_ d1pcia\_ d1gece\_ d1deua\_ d4bs6a\_  
d1xkga1 d1cqda\_ d1jqpa2 d2c0ya\_ d2bdza\_ d3p5ua\_ d1zoya1 d1qo8a2  
d1d4ca2 d1jnra2 d1kf6a2 d2jk6a2 d2jk6a1 d1feca1 d1feca2 d1lpfa1  
d1lpfa2 d1xhca1 d1xhca2 d1dxla2 d1dxla1 d1gera2 d1m6ia2 d1onfa1  
d3lada2 d3lada1 d1w4xa1 d1w4xa2 d1gesa2 d1mo9a1 d1xdia1 d1fl2a2  
d1fl2a1 d1fcda1 d1fcda2 d1h6va2 d1h6va1 d1mo9a2 d1gv4a2 d1gv4a1

d2gv8a2 d2gv8a1 d1aoga1 d1aoga2 d1hyua1 d1ebda1 d1ebda2 d3dk9a1  
d1qlra2 d1qlra1 d1gesa1 d1g4ma1 d1g4ma2 d1ps9a2 d1o94a2 d1lqta1  
d1pn0a1 d1reoa1 d1ju2a1 d2f5va1 d3c96a1 d2gmha1 d1pj5a2 d1gpea1  
d1o5wa1 d1n4wa1 d1k0ia1 d2dw4a2 d2ivda1 d1seza1 d2voua1 d1kdga1  
d1s5ja1 d2hbja2 d2igia\_ d1wlja\_ d1qhta1 d4dlea1 d1tgoa1 d2f96a1  
d3tr8a1 d3mxma\_ d1q8ia1 d1y97a1 d1w0ha\_ d1kfsa1 d2py5a1 d1noya\_  
d1d5aa1 d1yt3a3 d2guia\_ d3mwpal d4kbl1a\_ d3nvva1 d1krha3 d2h88b1  
d1n62a2 d1t3qa2 d1zoyb1 d1jq4a\_ d1ffva2 d1dgja2 d1rm6c2 d1r7ha\_  
d1faaa\_ d1wika1 d1xfla\_ d1ttza1 d2f51a1 d1ti3a\_ d1nhoa\_ d1sena\_  
d2i4aa\_ d1ep7a\_ d1zmaa1 d1fo5a\_ d3lefa1 d3diea1 d2yana1 d1z6na1  
d1oaza\_ d3zywa1 d4aj8a\_ d1nm3a1 d4fiwa\_ d1wmja\_ d4hs1a1 d1liloa\_  
d1xwaa1 d1wjka1 d2vm1a\_ d1fb6a\_ d1gh2a\_ d1h75a\_ d1nw2a\_ d1kx5b\_  
d3a6na\_ d4m6ba2 d2nqbd\_ d3wkjd\_ d2yfw\_ d4h9na\_ d5bnxa\_ d1kx5c\_  
d3r45a\_ d1eqzb\_ d4jjnb\_ d1f66c\_ d1eqza\_ d4wnnb\_ d1kx5a\_ d1u35c1  
d1id3a\_ d2nqbc\_ d1kx5d\_ d3us3a3 d3us3a1 d2b5ea2 d2b5ea3 d2b5ea1  
d2b5ea4 d2kp1a1 d2kp2a1 d1hyua3 d1hyua4 d1j08a2 d1pd212 d1nhya2  
d2a2ra2 d1k0dd2 d1f2ea2 d1gsua2 d1f3ba2 d2fhea2 d2pvqa1 d1tw9a2  
d1oyja2 d1e6ba2 d1k0ma2 d3ik7a1 d4is0a1 d1r5aa2 d1jlva2 d1m0ua2  
d3gtub2 d1z9ha2 d1okta2 d1axda2 d2gsra2 d1tu7a2 d1k3ya2 d1zgma1  
d1b48a2 d1gnwa2 d1gwca2 d2gsta2 d1glqa2 d1oe8a2 d1pn9a2 d1v2aa2  
d1fwla2 d1duga2 d1ig8a1 d1czan2 d1czan3 d1czan1 d1ig8a2 d1czan4  
d1bg3a4 d1bg3a3 d1bg3a2 d1bg3a1 d3wyha\_ d4g9sa1 d3gxra\_ d1qqya\_  
d1gd6a\_ d1f6ra\_ d1ivma\_ d2gv0a\_ d1iiza\_ d2z2fa\_ d1j8xa\_ d1ghla\_  
d1b9oa\_ d1691a\_ d2o4wa\_ d1p37a\_ d1k28a3 d1xjta1 d1jtma\_ d2f2qa\_  
d4e97a1 d1iyka2 d1iyka1 d1rxta1 d1iica2 d2za0a\_ d2c21a1 d1f9za\_  
d2pjsa1 d1klla\_ d2i7ra1 d1ecea\_ d1xqaa1 d5cj3a1 d1jifa\_ d2p7oa\_  
d1r9ca\_ d1nkia\_ d1mpya2 d1kw3b2 d1kw3b1 d4ghga1 d1tfza1 d3isqa1  
d3isqa2 d1sqia1 d1sqia2 d1lkda2 d1lkda1 d1mpya1 d1cjxa2 d1cjxa1  
d1sp9b2 d1t47a1 d1t47a2 d1flua2 d1sp8a1 d1sp8a2 d1w5qa\_ d2c1ha\_  
d1ohla\_ d1l6sa\_ d1qsta\_ d2beia1 d4m3sa\_ d1u6ma1 d1ygha\_ d1yk3a1  
d3dr6a\_ d1xmta\_ d1z4ea1 d2ge3a1 d1bo4a\_ d2fiaa1 d2jdca1 d1y9wa1  
d3to7a\_ d1wwza1 d2fl4a1 d2ozua1 d2b5ga\_ d2cy2a1 d2p0wa\_ d1cm0a\_  
d4pswa\_ d1yrea1 d1yr0a1 d1m4ia\_ d2gana1 d1yvka1 d1ghea\_ d2g3aa1  
d1y7ra1 d2euia1 d1q2ya\_ d2fsra1 d1xeba\_ d2ae6a1 d1cjwa\_ d1qsma\_  
d2aj6a1 d1y9ka1 d1i12a\_ d1vkca\_ d2atra1 d1n71a\_ d2d4pa1 d2fiwa1  
d2fe7a1 d1tiqa1 d2ou2a\_ d1yx0a1 d2fcka1 d1p0ha\_ d2j8ma\_ d2pq8a\_  
d1z4ra1 d1s3za1 d1ufha\_ d4od7a1 d1z6ma1 d4mcua1 d4dvca1 d1r4wa\_  
d3l9sa\_ d1un2a\_ d3rppa\_ d2qked\_ d4ksoa\_ d1t4za1 d1wwja\_ d4mh8a\_  
d4i7ga1 d1etha2 d1w52x1 d2ppla1 d1hpla2 d1lpbb2 d2oxea1 d1bu8a2  
d1rpla2 d1dy2a\_ d4l3wa\_ d1llfa\_ d1gz7a\_ d1lukca\_ d1cr6a2 d3groa\_  
d1pjaa\_ d1ei9a\_ d3ia2a\_ d1a88a\_ d4dgqa1 d1zoia\_ d3zxha\_ d1cgl1a\_  
d1rm8a\_ d1eaka2 d1hy7a\_ d2jsda\_ d1cxva\_ d1hv5a\_ d3p0ya1 d1lgra1  
d1n8yc2 d1n8yc1 d1m6ba2 d1m6ba1 d1dzka\_ d4tlja\_ d2a2ua\_ d4wfva\_  
d3t1da\_ d4i1axa\_ d3zq3a\_ d2nnda\_ d1i4ua\_ d1kxoa\_ d1bbpa\_ d1kt7a\_

dlexsa\_ d3s26a1 d1lf7a\_ d1qfta\_ d4gh7a\_ d1z24a1 d1qabe\_ d1xkia\_  
d1ew3a\_ d3bx7a\_ d4iawa1 d1n0sa\_ d1gkab\_ d3kzaa\_ d2k23a\_ d2l9ca1  
d2joza1 d1gm6a\_ d3kffa\_ d3saoa1 d1e5pa\_ d1yupa1 d1iiua\_ d2tbvc\_  
d1c8nc\_ d1x36a\_ d1smvc\_ d1ng0c\_ d4sbvc\_ d1lopa\_ d1f2nc\_ d1cixa\_  
d1y29a\_ d1v7fa\_ d2jtba\_ d1d1ha\_ d1g9pa\_ d1lupa\_ d1qk7a\_ d1mb6a\_  
d2a2va\_ d1niya\_ d1i25a\_ d1hvwa\_ d2mpqa\_ d1ie6a\_ d1kqha\_ d1la4a\_  
d2mxoa1 d1d10a\_ d1koza\_ d1qk6a\_ d1emxa\_ d1lgra\_ d1c6wa\_ glapy.1  
d3ljqa\_ d1rypd\_ d1irua\_ d1rypc\_ d3unfk\_ d1rypa\_ d1j2pa\_ d1irui\_  
d1j2qh\_ d3unfh\_ d1m4ya\_ d1rypb\_ d1irul\_ d1irug\_ d1iru2\_ d1q5rh\_  
d1rypg\_ d1g3ka\_ d1q5qa\_ d1e94a\_ d1irub\_ d1ryph\_ d3ty6a\_ d1iruj\_  
d1iruk\_ d1rype\_ d1irud\_ d1irue\_ d3mi01\_ d1rypf\_ d1iruh\_ d2z3ba\_  
d1iruc\_ d3mka2\_ d1iru1\_ d1ny721 d1a6ca3 d1a6ca2 d1a6ca1 d1pgl22  
d1pgl21 d1pgl11 d1ny711 d1mqta\_ d1d4m3\_ d1fmd3\_ d2mev1\_ glaym.1  
d1evl3\_ d4q4w1\_ d1r1a3\_ d2x5ia\_ d1rhi1\_ g1r1a.1 g1d4m.1 g1rhi.1  
d1b35b\_ d1loopa\_ d1tme1\_ d4iv1a\_ g1pvc.1 g1fpn.1 d1fpn1\_ d4gb31\_  
d1d4m1\_ d1fmd1\_ d1evl1\_ d2wzr3\_ g1cov.1 d1qqp3\_ g1fmd.1 d2x5ic\_  
d1rhi3\_ g1oop.1 d1hxs1\_ d1fpn3\_ d1bev1\_ g2mev.1 d1eah3\_ d1aym1\_  
d1pvc3\_ d1qqp1\_ d1zba3\_ d1h8ta\_ d3vbhc\_ g1b35.1 g1bev.1 d1hxs3\_  
g1ev1.1 d1bev3\_ g1tmf.1 d1tmf1\_ d1b35a\_ d2mev3\_ g1eah.1 g1h8t.1  
d1eah1\_ d4q4w3\_ d1r1a1\_ d1aym3\_ d1pvc1\_ d1zba1\_ d1h8tc\_ d1loopc\_  
d1tme3\_ g1qqp.1 d4iv1c\_ g1tme.1 d1y14b1 d2nn6i1 d1i941\_ d2zjra2  
d1smxa\_ d2qamc2 d1hh2p1 d2r7da1 d1r12a2 d1wfqa1 d3bzka4 d1x6oa2  
d3a0ja\_ d2j01d2 d2ja9a1 d4q15a\_ d1hr0w\_ d1luza\_ d2n3sa\_ d2vnud1  
d1h95a\_ d1go3e1 d2nn6h1 d2mo1a\_ d1iz6a2 d1jjga\_ d1e3pa2 d2ix0a3  
d2ix0a2 d2lxja\_ d1ueba3 d1ueba2 d2z0sa1 d1u0la1 d2ix0a1 d2eifa2  
d2je6i1 d3i2za1 d2c35b1 d2ahob2 d1t9ha1 d3i4oa\_ d2qall1 d1jt8a\_  
d2nn6g1 d1g6pa\_ d3cama\_ d1i94q\_ d1c9oa\_ d1d7qa\_ d2ba0a1 d2vnud2  
d2vnud3 d1khia2 d2qalq1 d1wi5a1 d1xtda2 d1ny4a\_ d1eixa\_ d3exra\_  
d2ffca1 d2fdsa1 d3n3ma1 d2czda\_ d2yyua\_ d1vqta1 d1dbta\_ d3ldva1  
d1ux8a\_ d1dlya\_ d4i0va\_ d2bkma\_ d2bmma\_ d2r80b\_ d1cqxa1 d1cg5a\_  
d1gcvb\_ d3boma\_ d2h8fb\_ d2raoa\_ d3bj1a\_ d4hrrb\_ d2r50a\_ d3d1kb\_  
d2aalb1 d3zhwa\_ d3hf4b\_ d3gdja\_ d1jebb\_ d3bj1b\_ d1x9fb\_ d1wmub\_  
d1gcva\_ d3bcqb\_ d3d4xb\_ d1gvha1 d2dc3a\_ d3hf4a\_ d4yu3a\_ d3k8ba\_  
d1qpwb\_ d2r80a\_ d3bcqa\_ d1v4wa\_ d3wtgb\_ d1jl7a\_ d4esaa\_ d1a9we\_  
d3d1ab\_ d1fsla\_ d4h2la\_ d1v4wb\_ d1mwca\_ d1vhba\_ d1jeba\_ d1spgb\_  
d1h97a\_ d1q1fa\_ d1tu9a1 d3d1aa\_ d1hdsb\_ d3hyub\_ d2zfb\_ d3fs4a\_  
d1oj6a\_ d1shrb\_ d4h2lb\_ d4yu3b\_ d1spga\_ d3hrwa\_ d3qqra\_ d3at5a\_  
d4wchd\_ d3hyua\_ d1cg5b\_ d1uc3a\_ d1hbra\_ d2raob\_ d1outb\_ d4esab\_  
d3gdjb\_ d3qqqa\_ d1x9fc\_ d3vrfa\_ d1litha\_ d3mkba\_ d3d4xa\_ d3mjpa\_  
d1jl6a\_ d3fh9a\_ d1outa\_ d2dc3b\_ d1lit2a\_ d3eoka\_ d3g46a\_ d1qpwa\_  
d3vrfb\_ d1ch4a\_ d1x9fd\_ d1hdsa\_ d2zfb\_ d3mkbb\_ d1or4a\_ d3wtga\_  
d1a4fa\_ d3fh9b\_ d3bomb\_ d3cy5a\_ d3at5b\_ d1x9fa\_ d2oifa\_ d4lmb\_  
d1cpcb\_ d3v57a\_ d1kn1a\_ d1cpca\_ d4f0ta\_ d2vjha\_ d4po5b\_ d1eyxa\_  
d1alla\_ d4f0tb\_ d1b33b\_ d1b8db\_ d4h0mb\_ d1b33a\_ d2vjhb\_ d4lmb6\_

d2vmlb\_ dlallb\_ d2vjta\_ d3dbja\_ d2vmla\_ d2vjtb\_ d4f0ub\_ d1f99b\_  
d4rmpa1 d1liaa\_ d1eyxb\_ d2uulb\_ d4lmsb\_ d4f0ua\_ d2bv8a\_ d1f99a\_  
d2bv8b\_ d2c7lb\_ d3dbjb\_ d4rmpb1 d1b8da\_ d4h0ma\_ d3v57b\_ d1kn1b\_  
d1liab\_ d2uula\_ d2j96a\_ d1f00i3 g1gxs.1 d1hlga\_ d2xqfa\_ d1ea5a\_  
d1f6wa\_ d1dx4a\_ d1qe3a\_ d1k4ya\_ d4qwwa\_ d2ha2a\_ d2h0ba\_ d2erfa\_  
d1h30a1 d3mw4a1 d1pz7a\_ d2r1ba\_ d3v64a1 d1d2sa\_ d3bopa1 d3mw3a1  
d1okqa1 d1okqa2 d2qvba\_ d2v9za\_ d4kafa1 d4iuua3 d4bvva\_ d5hpga\_  
d3k65a\_ d1ki0a3 d1ki0a2 d1ki0a1 d1a0ha1 d1pmla\_ d3sp8a3 d2feba1  
d1gvfa\_ d3qm3a1 d2fjka\_ d1f74a\_ d3l21a\_ d2elda\_ d1to3a1 d1w3ia\_  
d1sfla\_ d1n7ka\_ d1vcva1 d4imea\_ d1wa3a\_ d2ocza1 d1f2ja\_ d3m16a\_  
d2yxga\_ d1ub3a\_ d3a5fa\_ d1fbaa\_ d1l6wa\_ d1xfba1 d1wx0a1 d1vpxa1  
d1ojxa\_ d1mxsa\_ d2a4aa1 d1xkya1 d3cq0a1 d3s1xa\_ d1f05a\_ d1fdja\_  
d3cpra1 d4d2ja\_ d1e88a1 d1l6ja5 d1eaka4 d1eaka3 d1l6ja3 d1h8pa2  
d1h8pa1 d3rp2a\_ g1ucy.1 d1fuja\_ d2zchp\_ d3w94a\_ d1si5h\_ d1lo6a\_  
g2pka.1 d1cgha\_ d1kigh\_ d1a5ia\_ d3s9ba\_ d1hj8a\_ d1ao5a\_ d2anya\_  
d1q3xa1 d1gvza\_ d1azza\_ d4gsoa\_ d2f91a1 d1iaua\_ d1gdna\_ d1eufa\_  
g1fiw.1 d1eq9a\_ d4nfea\_ d2rdla\_ d1spja\_ d1elva1 d1a7sa\_ d1ekbb\_  
d1pfxc\_ d1yc0a\_ d2aiqa\_ g1fiz.1 d1fi8a\_ d4k60a\_ d4dgja\_ d1mzaa\_  
d1op0a\_ d3tjva\_ d1pytd\_ d1sgfg\_ g1gg6.1 d2eeka\_ g1rtf.1 d1a0ja\_  
d3g01a\_ d1pytc\_ d4e7na\_ d1ddja\_ d1z8ga1 d2hlca\_ d1npga\_ d1brup\_  
g1jou.1 d1sgfa\_ d1autc\_ g2hnt.1 g1kdq.1 d1orfa\_ d3s69a\_ d4crga\_  
d1fxya\_ d1bqya\_ d1ra6a\_ d1muka\_ d3gsza\_ d1te9a\_ d2xwha\_ d3uqsa\_  
d3hkwa\_ d3n6ma\_ d2cjqa\_ d2xyma\_ d1teba\_ d1te8a\_ d1s48a\_ d1u09a1  
d4wfxa\_ d3tyqa\_ d2pgga1 d1m4la\_ d2bk7a\_ d3fjua\_ d1z5ra1 d1kwma1  
d1uwya2 d1jqga1 d2c1ca1 d1dtda\_ d3lgia\_ d3i77a\_ d2z9ia2 d4nsva\_  
d1lcya2 d4jcna\_ d1os8a\_ d1hpga\_ d1p3ca\_ d1l1ja\_ d1qtfa\_ d1e69a\_  
d1mv5a\_ d3g60a4 g1ii8.1 d1ewqa2 d1ji0a\_ d1qhla\_ d1v43a3 d2wmfa1  
d1vpla\_ d1g2912 d4a82a2 g1f2t.1 d2d62a1 d3tuic1 d2bbsa1 d3g60a3  
d2ixea\_ d1g6ha\_ d1sgwa1 d2qi9c\_ d3rlfa1 d3b60a1 d3d31a2 d2pzea1  
g1xew.1 d1jj7a\_ d1oxxk2 d2onka1 d1w1wa\_ d1iwea\_ d1qf5a\_ d1vmaa2  
d1nija1 d1np6a\_ d2p67a1 d3ihla\_ d1okkd2 d1ls1a2 d1s1ma2 d1iona\_  
d2v40a\_ d1dj3a\_ d3hida\_ d2vola1 d2g0ta1 d1vcoa2 d1j8mf2 d1g3qa\_  
d1xjca\_ d1qzxa3 d1ihua2 d1ihua1 d2qm8a\_ d1dj2a\_ d4ioja\_ d1cp2a\_  
d1yrba2 d1hyqa\_ d3gqba2 d1skye3 d1xp8a1 d1tf7a2 d1tf7a1 d1ye8a1  
d1skyb3 d2qe7d2 d4blta\_ d4huta\_ d3ldaa2 d4hyya\_ d2i3ba1 d1cr1a\_  
d3j9tb2 d3ntua2 d1vdza1 d2z43a\_ d1e9ra\_ d1nlfa\_ d3ziaa2 d1n0wa\_  
d1g6oa\_ d3ziad2 d3j9ta2 d1pzna2 d3gqbb2 d1c4oa1 d2p6ra3 d2p6ra4  
d1oywa2 d1oywa3 d1wrba1 d1w36b2 d1w36b1 d1c4oa2 d3bora\_ d1t6na\_  
d2eyqa5 d2eyqa3 d2eyqa2 d2zu6a2 d1veca\_ d1uaaa1 d1w36d1 d2g9na1  
d1z3ix2 d2rb4a\_ d1hv8a1 d1hv8a2 d1t5ia\_ d1w36c2 d2j0sa2 d2j0sa1  
d1fuka\_ d3hjha1 d1z5za1 d1z63a1 d1s2ma2 d1s2ma1 d1wp9a1 d1wp9a2  
d1gm5a3 d1gm5a4 d3dina4 d3dina3 d1q0ua\_ d1w36c1 d1z3ix1 d1nkta3  
d1nkta4 d1uaaa2 d1w36d2 g1qhh.1 d2fwra2 d2fwra1 d3q3ma\_ d1za0a1  
d1mxra\_ d2inca\_ d1jk0a\_ d2incb\_ d1mhyb\_ d3hf1b\_ d1mtyb\_ d1r2fa\_

d2uw1a\_ d1mhyd\_ d3n37a\_ d1afra\_ dloquc\_ d1syya\_ d1mtyd\_ d2o1za\_  
d1uzra\_ d1smsa\_ d2fkza\_ d1zujal d1s3qa1 d2fjca1 d1z6om1 d1veia\_  
d4dyya\_ d1jiga\_ d3gvya\_ d2pyba\_ d4cy9a1 d3bvfa1 d1r03a\_ d2cf7a\_  
d1nf4a\_ d1zs3a1 d4iwka\_ d3ka8a\_ d3np0x\_ d1n1qa\_ d11b3a\_ d4e6ka\_  
d1z6oa1 d2fzfa1 d4dyua\_ d3ge4a\_ d1jgca\_ d4am4a\_ d2z6ma\_ d1ji5a\_  
d1vlga\_ d1lkoa1 d3qz3a\_ d1o9ra\_ d2ffxj\_ d1euma\_ d1yv1a1 d2v2pa\_  
d1j30a\_ d4di0a\_ d1dpsa\_ d1oewa\_ d2qzxa\_ d2asia\_ d1psoe\_ d1miqa\_  
d1smra\_ d2h6ta\_ d1pfza\_ d1lizda\_ d3hd8a\_ d1j71a\_ d1dpja\_ d4aa9a\_  
d1t6ex\_ g1b5f.1 g1lya.1 g1htr.1 d1qdma2 d1bxoa\_ d1wkra\_ d1tzsa\_  
d1libqa\_ d2qzwa\_ d1ex4a2 d1c6va\_ d1bdqa\_ d3ggta\_ d3ixoa\_ d1mrxa\_  
d2haha\_ d1tw7a\_ d4njja\_ d1sgua\_ d2p3da\_ d1nsoa\_ d3d3ta\_ d2rkfa\_  
d1c6ya\_ d2rspa\_ d3ogpa\_ d3ekwa\_ d2o4na\_ d2j9ja\_ d1baia\_ d3ggua\_  
d3lzua\_ d4npua\_ d4j55a\_ d2r8na\_ d2fxda\_ d2p3ca\_ d4dqa\_ d3ttpa\_  
d3t3ca\_ d2p3aa\_ d2hc0a\_ d2fdda\_ d3mwsa\_ d1k8rb\_ d1wgra1 d1ef5a\_  
d1wfyal d1e8ya3 d1wgya1 d2cs4a1 d1wxma1 d2byea1 d3kh0a1 d2byfa1  
d1wxaa1 d1e7ua3 d1h4ra3 d4yl8a1 d2a16a3 d1zbfal d2z1ha\_ d2etja1  
d3qioa1 d1j11a\_ d2e41a\_ d1j12a\_ d21sna1 d1io2a\_ d1uaxa\_ d2yv0x\_  
d1mu2a1 d1lekea\_ d1i39a\_ d1wgda1 d1wggal d4q5eb\_ d1wjnal d1se9a\_  
d3n3kb\_ d1wz0a1 d1we6a1 d2m0xa\_ d2gbka\_ d3rt3b1 d1wh3a1 d1sifa\_  
d2ekec2 d4ii2b1 d4hk2a1 d1m94a\_ d1wgha1 d1ttna1 d1j8ca\_ d1wx8a1  
d3v6cb1 d2ma9b\_ d4i61b1 d1bt0a\_ d2jvca1 d1iyfa\_ d2k1fa\_ d1wxval  
d1wf9a1 d1t0ya\_ d2io0b2 d1x1ma1 d2gbma\_ d1zw7a1 d2m17a\_ d1ud7a\_  
d1we7a1 d2lwpal d2gджа\_ d1wjua1 d1v6ea1 d1v86a1 d4eewa\_ d1wial1  
d4icva\_ d4gu2a\_ d1wx7a1 d1wy8a1 d4hjka1 d2faza1 d1v5oa1 d3ruib\_  
d1eo6a\_ d3waob\_ d2r2qa1 d3m95a\_ d3wana\_ d2a13a1 d2cr5a1 d1wj4a1  
d1s3sg\_ d1yvca1 d1yeza1 d1qoza\_ d5ajha1 d2ftba\_ d1pmpa\_ d2rcqa1  
d1fdqa\_ d4lkpa\_ d1sa8a\_ d1vyfa\_ d1lpja\_ d3vg7a1 d4azqa1 d5bvqa\_  
d1p6pa\_ d2qo4a\_ d1opba\_ d1yival d1o1va\_ d4bvma1 d4tkba\_ d4i3ba\_  
d1bwya\_ d1ftpa\_ d1ggla\_ d4gkca\_ d1cbia\_ d3p6da1 d1kqwa\_ d2a0aa1  
d1dszb\_ d3cbba\_ d1ynwal d1r4ia\_ d1hcqa\_ d2hana\_ d2hanb\_ d2enva1  
d1kb4b\_ d2n11b\_ d1lola\_ d1cita\_ d1lum8a\_ d1ixza\_ d1qvra2 d1qvra3  
d1sxjc2 d1jr3d2 d2p65a\_ d118qa2 d1g8pa\_ d3hu3a3 d1sxjd2 d1njfa\_  
d1in4a2 d1sxja2 d1tuea1 d2ce7a2 d1w5sa2 d1sxjb2 d1d2na\_ d1ny5a2  
d1ofha\_ d2gnoa2 d2a5yb3 d1fnna2 d1u0ja1 d1lv7a\_ d1iqpa2 d2fnaa2  
d1ixsb2 d4gita\_ d1sxje2 d1g41a\_ d21j7a\_ d1n4na\_ d2m8bb1 d2kyqa\_  
d3psma\_ d1jkza\_ d1jxca\_ d2g11a\_ d1ugla\_ d4uj0a\_ d2k4ua\_ d1hp2a\_  
d2lu9a\_ d1baha\_ d2meoa1 d1wm7a\_ d1hlya\_ d1n8ma\_ d1jlza\_ d1wpda\_  
d1c55a\_ d1pvza\_ d1wt7a\_ d1rjia\_ d1wz5a\_ d1m2sa\_ d1pjva\_ d1c49a\_  
d1qkya\_ d2ktca1 d1wmta\_ d1du9a\_ d1j5ja\_ d1t0za\_ d2i61a\_ d1t1ta\_  
d1sn4a\_ d1kv0a\_ d21kba\_ d1npia\_ d1wwna\_ d1pe4a\_ d2kbka\_ d2li7a\_  
d2kbha\_ d1dq7a\_ d1sega\_ d1omya\_ d1zywal d1jzaa\_ d2jcqa\_ d1n9wal  
d1bbua1 d1e1oa1 d1c0aa1 d1b8aa1 d3a74a1 d1eova1 d1t61c1 d1iyjb4  
d1iyjb5 d1iyjb3 d1o7ia\_ d4ipca1 d1x3ea\_ d4apva\_ d1jb7a1 d1jb7a2  
d1jb7a3 d3kdfa\_ d1ue1b\_ d1wjja1 d3eiva\_ d1xjva2 d1xjva1 d2ccza2

d1se8a\_ d1jb7b\_ d1qvca\_ d3ulla\_ d1qzga\_ d1miua4 d1miua5 d1miua3  
d3g48a1 d1gd7a\_ d1jjcb3 d1pyba\_ d3ubub\_ dlegia\_ d1qo3c\_ d1v7pa\_  
d1tdqb\_ d3ubua\_ d1c3ab\_ d1h8ua\_ d3bx4b\_ d1t8ca1 d1sb2a1 d1qdda\_  
d2ziba1 d3cada\_ d1byfa\_ d1j34b\_ d1jwia\_ d1jzna\_ d1c3aa\_ d1wmza\_  
d3bdwb\_ d1hq8a\_ d1fifa1 d1dv8a\_ d3hupa\_ d1wk1a1 d1umra\_ d2afpa\_  
d3bx4a\_ d1gz2a\_ d1sl6a\_ d1v7pb\_ d3g8ka\_ d1ixxa\_ d1j34a\_ d1jwib\_  
d1g1sa1 d1y17a1 d1ja3a\_ d1fvub\_ d3bdwa\_ d1sb2b1 d1fvua\_ d1umrc\_  
d1oz7a\_ d4m17a\_ d3cfwa1 d1ypqa1 d1g1ta1 d3fd4a\_ d3l9jc\_ d4dn8a1  
d1v4lb\_ d1rd1l\_ d2msba\_ d1prtc2 d1pfsa\_ d2a1ka\_ d1rpma\_ d2shpa1  
d1yfoa\_ d1l8ka\_ d2ooqa1 d1g4us2 d1p15a\_ d1lara2 d1lara1 d1wcha\_  
d2fh7a2 d2fh7a1 d1ohea1 d1ohea2 d2f4da\_ d1rxda\_ d2hxpa\_ d1xria\_  
d1d5ra2 d1fpza\_ d3ezza\_ d4y2ea\_ d1i9sa\_ d3azya\_ d3wvja\_ d1upsa1  
d1ajoa\_ d2hyka\_ d1ajka\_ d2vy0a\_ d1o4ya\_ d3o5sa\_ d3d6ea\_ d3atga\_  
d1umza\_ d3i4ia\_ d1c1la\_ d4lbqa\_ d1a78a\_ d1slta\_ d4no4a\_ d3zsja\_  
d3duia\_ d1is3a\_ d1qmja\_ d1hlca\_ g1qmo.1 g1len.1 d3zyra\_ d1fnya\_  
d1n47a\_ g2ltn.1 d1avba\_ d3usua\_ d1dhkb\_ d1ukga\_ d1g8wa\_ d1g9fa\_  
d1wbfa\_ d3wcsa\_ d1g7ya\_ g1loe.1 d1mvqa\_ d1hq1a\_ d1v6ia\_ d1dbna\_  
d1qnwa\_ d1fx5a\_ d4l8qa\_ d1ioaa\_ d3n35a\_ d3ubra\_ d1qo8a1 d1d4ca1  
d2k3va\_ d1ft5a\_ d1qdba\_ d1mlqa\_ d2j7aa\_ d1h21a\_ d1ogyb\_ d4fasa\_  
d1oaha\_ d1sp3a\_ d3h33a\_ d1rwja\_ d19hca\_ d1os6a\_ d3bxua\_ d3h4na\_  
d1i77a\_ d3caoa\_ d1j0pa\_ d2ctha\_ d1duwa\_ d1ofwa\_ d2e84a\_ d1hh5a\_  
d1gyoa\_ d3h34a\_ d1wioa4 d1ccza2 d1dr9a2 d1ic1a1 d2d9qb1 d2nxyb2  
d1adqa1 d1fnga1 d1uvqb1 d1zs8a1 d2vola1 d2vola2 d1mfb12 d2jelh2  
d1uwe12 d3qq4b1 d1kjob\_ d1k5na1 d1osph2 d4odh12 d1ow0a1 d1ow0a2  
d1bfob2 d3l9ra2 d3jtt1 d2fath2 d4elkb2 d1fn4b2 d2xfxb\_ d1pg7x2  
d1cqka\_ d4k71b2 d1lk2a1 d1eapb2 d4lfhg2 d1i4fa1 d2nw2a2 d1kfah2  
d1mhca1 d1h3ua1 d1wejh2 d1h0db2 d1a5fh2 d1kcvh2 d1mjuh2 d1qqda1  
d1kcrh2 d1k8ia1 d3huja2 d2nnab1 d1nfd2 d3mffb2 d1s9va1 d1lk3h2  
d1q0x12 d1fv1b1 d1neza1 d4rfeb2 d1r3ha1 d1a6tb2 d1kjva1 d1pz5b2  
d1onqa1 d2bc4a2 d1de4a1 d1k8da1 d1tcra2 d1dn0b2 d1nfd2 d2xwtb2  
d1bfoa2 d1mexh2 d1iakb1 d1ypzf2 d4f7ea2 d1q7212 d2fbjh2 d1fe8h2  
d1clzh2 d1fngb1 d1uvqa1 d1vgka1 d1c16a1 d4j12a2 d4x99b2 d1igtb3  
d1je6a1 d1q72h2 d1nldh2 d1teth2 d2hmic2 d1ilca2 d1ilca1 d1k8ib1  
d1q0yh2 d1kfa12 d3frua1 d1pg7w2 d1u58a1 d1igyb4 d1igyb3 d1hyrc1  
d1klub1 d1deeb2 d1c12b2 d2bc4b2 d2ig2h2 d1kcv12 d3wn5b1 d1lk2b\_  
d1lk312 d1mjul2 d1sm3h2 d1q0xh2 d1zvsal d1ydpal d1u8ib2 d1ypze2  
d1kcu2 d1op9a\_ d1y0la1 d1etzb1 d1legj11 d2gsib1 d1nj9a1 d4jfhd1  
d1aqk11 d1t2ja\_ d1lo4h1 d1zvya1 d3v4v11 d4enec1 d1kxtb\_ d5e8ea1  
d2pxya\_ d4weud\_ d1xiwc\_ d2esvd1 d1qnzh\_ d1ogae1 d1f4xh1 d4n1hb\_  
d3ezjb1 d3mlw11 d1kfah1 d1etza1 d1b4jh1 d3cfic\_ d4w68a\_ d2arja1  
d1ek3a\_ d2ok011 d1vera\_ d1uwgh1 d1blnb1 d1fpth1 d1rzga1 d2giya1  
d4m3kb1 d1nc2a1 d2nyyd1 d1ncna\_ d1fbih1 d5dxwa\_ d4fqqa1 d1dqdh1  
d1jfq11 d1kelh1 d1faih1 d1frgl1 d1figl1 d4m6n11 d1fo0a\_ d4hxb11  
d3b5ga\_ d3quyd1 d2h9gb1 d1i8kb\_ d2dd8h1 d2ck0h1 d1eaja\_ d4w6wb1

d2a6ib3 d1t66d1 d2e27h\_ d1ob1b1 d1f11b1 d2v7na1 d1ad0a1 d2xt1b1  
d1pskh1 d4i13b1 d2op4l1 d1a0ql1 d1uwell d1za3a1 d1ncbl1 d4uu9a\_  
d1bm3h1 d1cloh1 d1nqba2 d1cf8h1 d4y5va\_ d1mhph1 d5anma1 d4cdgc1  
d4ldeb\_ d1y01b1 d2pcpb1 d1z3gl1 d1dfb11 d1fh5h1 d3g5xa1 d1tzib1  
d4dn3l1 d3zhka1 d2b1hh1 d2uy1a1 d1f3dh1 d1nj9b1 d2agjh1 d2h1pl1  
d1q72h1 d8fabb1 d1ndmb1 d1rjca1 d4u6hb1 d3upca\_ d2fbj11 d1osph1  
d1tvda\_ d2cjev\_ d4fhbd1 d1bd2d1 d1rz7h1 d3nn8a\_ d1blna1 d1knoa1  
d1nfdal d2bmkb1 d1dq11\_ d1igyb1 d1igf11 d12e8h1 d3utza1 d1nc2b1  
d1rihh1 d4mwfb1 d4jvpa1 d1mieh1 d1rhfa1 d1fgn11 d1sbsh1 d1lp9e1  
d1dn0a1 d4lqf11 d1iaih1 d1kgcd1 d1mh5b1 d1gpo11 d2g60h3 d1f8t11  
d2jixd1 d4grwh\_ d1fo0b\_ d1bfob1 d1axsa1 d1u9ka\_ d1nmbh\_ d1h8na1  
d1h8na2 d1jguh1 d4eura1 d3sdy11 d35c8h1 d1w7211 d1mvub\_ d1i9rh1  
d1ob1a1 d4wenb\_ d1yeeh1 d3ietc1 d1f58h1 d1ad0b1 d1mqk1\_ d1nbvh1  
d4b50a\_ d3r8bb\_ d1baf11 d1mamh1 d4rgne1 d2gsgb\_ d35c811 d1bafh1  
d1ai1h1 d2pcpa1 d2fath1 d2x1pa\_ d1orsb1 d1ibgl1 d1shma\_ d1a2yb\_  
d1u0qa\_ d2coqa\_ d1hilb1 d1qfwi\_ d1jv5b\_ d1fn4b1 d5e0qa\_ d1nsh1  
d1plgl1 d4ocx11 d1kb5h1 d1rzfh1 d1pg7x1 d2fx7h1 d2oi9c\_ d1l7i11  
d3eyva1 d1d5i11 d4ffyl\_ d1tet11 d1a6wh\_ d1ac6a\_ d3dvfa\_ d1nfdel  
d1mimh1 d1ri8a1 d1jhlh\_ d3dura\_ d1fskb1 d1f97a1 d3so3b1 d2ak4d1  
d1lp9f1 d4z7wf1 d1l7th1 d4y5ya\_ d4x7ec1 d1emth1 d1ikfl1 d1nlbh1  
d4utal1 d1bjma1 d1eapb1 d1u6ah1 d2dtgd1 d1kj2b\_ d1xeda1 d1c1eh1  
d1fgvh\_ d2bnub1 d2fb4h1 d2dtgb1 d1ktrh\_ d1jpth1 d1qkz11 d4hepg\_  
d2atpb1 d1flrh1 d2hrp11 d1mvfa\_ d1iaim1 d3k80a1 d2jb5h1 d3zkxc\_  
d4grwe\_ d1it9h1 d1rhhb1 d3w9ec\_ d1e4wh1 d1sy6h1 d2j6eh1 d3qxta\_  
d1jglh1 d1p7ka1 d1tzhb1 d4n8pa1 d1gaf11 d2jelh1 d1wioa2 d4i0cc1  
d1cicb1 d1lmka2 d1lmka1 d1iqwh1 d1lorqb1 d1ejoh1 d1jnlh1 d4zg1a\_  
d43c9b\_ d1ggbl1 d1wejh1 d3q6fa1 d1f3dj1 d3c61a1 d1bqlh1 d3p9wb\_  
d1a3r11 d1h0db1 d2uzil\_ d1eo811 d1qfw1\_ d1n7m11 d1igja1 d1c5ch1  
d2a9mh\_ d1rmfh1 d1fj1b1 d4heme\_ d1ccza1 d1a5fh1 d1ogad1 d1dlfh\_  
d1qa9b\_ d1vgel1 d3qskb\_ d1sjxa\_ d4ozfg1 d1sq2n\_ d1qd0a\_ d1kcvh1  
d1c5db1 d3qcul1 d3bn9d1 d1mjuh1 d4y8dc\_ d7fabh1 d3dvgb1 d1lo011  
d1a6tb1 d1gigh1 d1kcrh1 d2hwz11 d1yjdc1 d3clfl1 d4krna\_ d1dl7l\_  
d1e6o11 d1mexh1 d3r0ma\_ d4kkna\_ d1fns11 d1oaqh\_ d1rzia1 d1lucbh1  
d1ncw11 d4b41a\_ d1nfd11 d2mpah1 d2d7t11 d4grwf\_ d4b5ea\_ d1lk3h1  
d3u79a\_ d4u3xa\_ d1ghf11 d1bvkb\_ d1mcww1 d1b88a\_ d1jrhh1 d32c2b1  
d4wemb\_ d1dsfh\_ d1op3h1 d1ce111 d1iqda1 d1qoka1 d1qoka2 d1qfuh1  
d2crya1 d1ay1h1 d1oaql\_ d3ab0b\_ d1rur11 d1t4kb1 d1bz7b1 d1n0xh1  
d1for11 d1lucb11 d4w6yb\_ d43c9a\_ d2aab11 d1tzia1 d4n1ca\_ d1k6qh1  
d3g9ab\_ d4tvsa1 d1igmh\_ d1pz5b1 d3dx9a1 d3wxwh\_ d1nakh1 d1kcull1  
d3eaka\_ d4qlra1 d1cr911 d1d9ka\_ d1f4x11 d1deea1 d2i27n2 d1c12a1  
d2orbl1 d1j8hd1 d1mcp11 d1c5da1 d1kenh1 d1bd2e1 d1h5ba\_ d4x7fc1  
d3upaa\_ d1t3fa1 d1indh1 d2dtgc1 d4hc111 d1zv5a1 d4wgvb\_ d1uwgl1  
d4f37k1 d1aqkh1 d1vesa\_ d3zkqd\_ d1fpt11 d1lo411 d1knob1 d3rrqa\_  
d1ct8b1 d4orz\_ d1mlbb1 d4hgkc1 d1dqdl1 d1bogb1 d4ozhe1 d1dr9a1

d1i7za1 d1dn0b1 d1kell1 d1rzi1b1 d1ypz1f1 d1wtla\_ d1hkfa\_ d1fail1  
d1figh1 d2vyre\_ d1sjva\_ d1ohqa\_ d1bfoa1 d1pkqb1 d1mjul1 d1b4j11  
d1nsn11 d2arjb1 d1p4bh\_ d4aj0a\_ d3nn8b\_ d2rcja1 d1f2xk\_ d4v1dd\_  
d1adqh1 d2eksa\_ d4k3ga\_ d1jfqh1 d1uweh1 d1frgh1 d4gftb\_ d1uz8b1  
d4n1ea\_ d1bm3l1 d1clol1 d3mcka1 d2vq1a1 d1ae6h1 d4aq1b1 d1uj3b1  
d1nbqa1 d1fh5l1 d2ck0l1 d2ywza\_ d1q72l1 d4nxbx\_ d1hila1 d4hz1b1  
d2j88l1 d1zmya1 d1cd0a\_ d1a4ka1 d1pskl1 d1a0qh1 d4krmb\_ d1ncbh1  
d2fbjh1 d1j8he1 d1i3ua\_ d1cf8l1 d1fe8h1 d2p1ya1 d1eeqa\_ d2x89a\_  
d1ol0a\_ d2r01h1 d1ub5a1 d1dfbh1 d3eyvb1 d4jdvb1 d4p2cg\_ d2gsia1  
d2agj11 d1u3ha1 d2h1ph1 d1rih11 d1fskc1 d1boga1 d2a77l1 d1ospl1  
d1qfoa\_ d3dwta\_ d2fx7l1 d1rz7l1 d3stba1 d1pkqa1 d1b6da1 d1dzba2  
d1dzba1 d1kj2a\_ d4l1ha\_ d1rzgb1 d1dqlh\_ d12e8l1 d1miel1 d1jmaa\_  
d1sbs11 d1fgnh1 d1f58l1 d1mqkh\_ d1ndgb1 d3qegl1 d1iail1 d2aw2a1  
d1tqbc1 d3fo2a1 d4dkaa\_ d1f8th1 d2g60l1 d2ywya\_ d1uj3a1 d1yc7a\_  
d3bd3a\_ d4w6xb1 d1nmb1\_ d1i8ka\_ d1rj1b1 d1ypze1 d1p7kb1 d1kxqe\_  
d1gpoh1 d2z4qa1 d1w72h1 d1i9r11 d4qgya1 d4xt1c\_ d2qqnh1 d1cica1  
d3c08h1 d2cd0a\_ d2bdnh1 d1hnga1 d1mam11 d1nldh1 d1cr9h1 d4lcih1  
d3bkyh1 d3qg7l1 d1ai1l1 d1kxvc\_ d4iosd\_ d1l7ih1 d2x1qa\_ d1ub6b1  
d3k74b\_ d1ibgh1 d1teth1 d1igya1 d1hxma1 d2x6ma\_ d2e7la\_ d5e03a\_  
d1qfwm\_ d2r0kh1 d1igjb1 d1rurh1 d1plgh1 d1mj8h1 d1yuhb1 d3fmgl1  
d1rzfl1 d1emt11 d1ad9b1 d1igtb1 d1nlb11 d1d5ih1 d3k7ua\_ d4ffyh\_  
d1bwwa\_ d3dvga1 d1a6ta1 d1fgvl\_ d4qxgl1 d1mim11 d1jh11\_ d2hffb1  
d2hh0l1 d1qkzh1 d1l7t11 d1afvh1 d1iaii1 d2cjuh\_ d1um5h1 d2ghwb2  
d2ghwb1 d1kgce1 d2fgwh1 d1likfh1 d1dvfd\_ d2i24n1 d2xtjb\_ d1za3b1  
d2yc1a\_ d2hh0h1 d2x1oa\_ d1bvka\_ d1rj1a1 d5e7ba1 d1igta1 d1i11b1  
d2fb4l1 d1mvua\_ d1jpt11 d32c2a1 d1fvca\_ d1iqdb1 d2hrph1 d2p4ab\_  
d4qo1a\_ d1p2cb1 d1wt5c\_ d1t4ka1 d5c1mb\_ d1it9l1 d1bz7a1 d1b2wh1  
d1e4wl1 d1jnl11 d1yedb1 d1za6b1 d3u7aa\_ d1igfh1 d3gnml1 d1orsa1  
d1wejl1 d1a2ya\_ d1hxmb1 d1gafh1 d2j4wh1 d1pz5a1 d1j05a\_ d1a3rh1  
d4fq1l1 d1qfwh\_ d1eo8h1 d1n7mh1 d4s11a\_ d1kegh1 d5da4a\_ d1iqwl1  
d3whxb1 d1vgeh1 d1deeb1 d1c12b1 d1t2ql1 d1ad9a1 d3gsnb1 d3b2uc1  
d1ggbh1 d1t3fb1 d1nak11 d4ocmc\_ d1lila1 d2v7hb3 d2esve1 d1mcoh1  
d2qr0b1 d2q3aa\_ d1ct8a1 d1kcr11 d2pxyb\_ d2uzih\_ d5c3ld\_ d3durb\_  
d1c5c11 d2ak4e1 d1dl7h\_ d1xiwd\_ d1mlba1 d1rmfl1 d1i7zb1 d1dlfl\_  
d2xa3a\_ d5bq7b1 d1dqqb1 d3h42l1 d1legjh1 d1kcvl1 d1fe8l1 d2j6el1  
d1f3rb2 d1l1k3l1 d1sm3h1 d1q0xh1 d1ghfh1 d7fabl1 d1igch1 d1lo0h1  
d4idla\_ d5c2b1\_ d1jrh11 d1i11a1 d3zhda1 d4kfzc\_ d1b0wa\_ d1e6oh1  
d1mex11 d4krpb\_ d1fnsh1 d1ncwh1 d4hgma\_ d4eigb1 d4rzca\_ d2mpa11  
d4y5xa\_ d5en2b1 d3lrga1 d4ej1c1 d1rhha1 d1j05b\_ d1forh1 d1q9wb1  
d2wzpd\_ d2aq2a1 d1h0da1 d3revb1 d2ij0c1 d1tzha1 d4m7j11 d1k6ql1  
d3b9kc1 d1igml\_ d3qeua1 d1dsfl\_ d1celh1 d1kcuh1 d1zvha1 d1zvoa1  
d1tqbb1 d1ay1l1 d2qsc11 d2cgrh1 d1n10h1 d1ken11 d3eo0a1 d4n9ob1  
d1n0x11 d3k1kc\_ d1c4qa\_ d1prtcl d2wv6d\_ d1prtfl\_ d1l1trd\_ d4l63b1  
d1r4pb\_ d1prtd\_ d1tl0f\_ d2bosa\_ d1prtb1 d3chbd\_ d2aq2b1 d1lenfa1



dli4pa1 dlv1oa1 dlet9a1 dlesfa1 d2g9hd1 d4ohja1 d1klud1 d1bxta1  
d1eu3a1 d1ty0a1 d1fnua1 d2cqva1 d1fhga\_ d2k1ma\_ d2d12a1 d1biha3  
d1biha1 d1biha4 d3qp3a1 d1g1ca\_ d1gxea\_ d1cvsc2 d1cvsc1 d1xmwa2  
d1m4ka2 d2otpa2 d1biha2 d1rhfa2 d2fcba2 d2fcba1 d1wwbx\_ d1gsma2  
d1epfa1 d1epfa2 d2dava1 d1waaa\_ d1f97a2 d1x44a1 d1vcaa2 d1fnla2  
d1fnla1 d3b5ha2 d3h8na2 d3h8na1 d1jbja1 d1jbja2 d1pd6a\_ d1f2qa2  
d1f2qa1 d3cx2a\_ d1nbqa2 d3b5ha1 d1n26a1 d1xiwb\_ d1xaua\_ d1fltx\_  
d2ifga1 d1olla1 d1olla2 d1cs6a4 d1cs6a3 d1cs6a2 d1cs6a1 d2gw5a2  
d1sy6a1 d1xiwa\_ d1lucta2 d1lucta1 d1ry7b2 d1gl4b\_ d1qz1a3 d1olza1  
d2c9aa1 d1wwca\_

**Family-80 (c.94.1.2)**

**Positive dataset contains 2 protein sequences.**

d1eh3a\_ d3skpa\_

**Negative dataset contains 3961 protein sequences.**

d1xfda2 d1ax4a\_ d2v1pa1 d2ez1a\_ d1u08a\_ d1lc5a\_ d1b5pa\_ d2ay1a\_  
d3pd6a\_ d7aata\_ d2csta\_ d1j32a\_ d1fg7a\_ d4wlha\_ d1o4sa\_ d1v2da\_  
d1gdea\_ d1m6sa\_ d1v72a1 d1svva\_ d1ajsa\_ d1wsta1 d2f8ja2 d1lk9a\_  
d1vp4a1 d1xi9a1 d2gb3a1 d1yaaa\_ d2bnma2 d1xkla\_ d2wfla\_ d1js3a\_  
d3rcha\_ d3k40a\_ d2cfba1 d1dfoa\_ d1o69a\_ d1bj4a\_ d3k28a\_ d2bwpa\_  
d3lg0a\_ d2fnua\_ d3ou5a\_ d1z7da1 d1b9ha\_ d1iaya\_ d4msoa\_ d1bs0a\_  
d1s0aa\_ d1sffa\_ d3tqxa\_ d1mdoa\_ d3qboa\_ d3pgya\_ d2dkja\_ d1ejia\_  
d1vefa1 d4wxga\_ d3bs8a\_ d3gbxa1 d1w23a\_ d1sefa\_ d1sfna\_ d1sq4a\_  
d1cixa\_ d1y29a\_ d1v7fa\_ d2jtba\_ d1d1ha\_ d1g9pa\_ d1lupa\_ d1qk7a\_  
d2a2va\_ d1niya\_ d1i25a\_ d1hvwa\_ d2mpqa\_ d1ie6a\_ d1kqha\_ d1la4a\_  
d2mxoa1 d1dl0a\_ d1koza\_ d1qk6a\_ d1emxa\_ d1lqra\_ d1c6wa\_ d1f56a\_  
d1bypa\_ d1azca\_ d1ws8a\_ d3u25a\_ d1cuoa\_ d1id2a\_ d1rkra\_ d2iaac\_  
d4dp1x\_ d1nwpa\_ d2gima\_ d2i7sa\_ d1qhqa\_ d1gyca3 d1hfua2 d1kbva1  
d1kbva2 d1sdda1 d1sdda2 d1gyca1 d1gyca2 d1mzya1 d2bw4a1 d1aoza1  
d1aoza3 d1aoza2 d1kyaa2 d1kyaa3 d1kyaa1 d1mzya2 d4e9sa1 d1sddb1  
d1sddb2 d1hfua1 d1hfua3 d1oe1a2 d1oe1a1 d1v10a2 d1v10a3 d1v10a1  
g1f8v.1 d1novc\_ d2bema\_ d1pama1 d1ea9c1 d1qhoa1 d2fhfa2 d2fhfa1  
d1k3ia1 d1j0ha1 d1csla1 d2bhua1 d1edqa1 d1f1sa2 d1ut9a2 d1gvia1  
d1txka1 d1adqa1 d1fnga1 d1uvqb1 d1zs8a1 d2vola1 d2vola2 d1mfbl2  
d2jelh2 d1uwel2 d3qq4b1 d1kjob\_ d1k5na1 d1osph2 d4odh12 d1ow0a1  
d1ow0a2 d1bfob2 d3l9ra2 d3jtth1 d2fath2 d4elkb2 d1fn4b2 d2xfxb\_  
d1pg7x2 d1cqka\_ d4k71b2 d1lk2a1 d1eapb2 d4lfhg2 d1i4fa1 d2nw2a2  
d1kfah2 d1mhca1 d1h3ua1 d1wejh2 d1h0db2 d1a5fh2 d1kcvh2 d1mjuh2  
d1qqda1 d1kcrh2 d1k8ia1 d3huja2 d2nnab1 d1nfd2 d3mffb2 d1s9va1  
d1lk3h2 d1q0x12 d1fv1b1 d1neza1 d4rfeb2 d1r3ha1 d1a6tb2 d1kjva1  
d1pz5b2 d1onqa1 d2bc4a2 d1de4a1 d1k8da1 d1tcra2 d1dn0b2 d1nfde2  
d2xwtb2 d1bfoa2 d1mexh2 d1iakb1 d1ypzf2 d4f7ea2 d1q7212 d2fbjh2  
d1fe8h2 d1clzh2 d1fngb1 d1uvqa1 d1vgka1 d1c16a1 d4j12a2 d4x99b2  
d1igtb3 d1je6a1 d1q72h2 d1nldh2 d1teth2 d2hmic2 d1ilca2 d1ilca1  
d1k8ib1 d1q0yh2 d1kfa12 d3frua1 d1pg7w2 d1u58a1 d1igyb4 d1igyb3

d1hyrc1 d1klub1 d1deeb2 d1c12b2 d2bc4b2 d2ig2h2 d1kcvl2 d3wn5b1  
d1lk2b\_ d1lk3l2 d1mjul2 d1sm3h2 d1q0xh2 d1zvsa1 d1ydpal dlu8ib2  
d1ypze2 d1kcu2 d4alac\_ d1pjwa\_ d1s6na\_ d3uzqb\_ d2phla2 d2phla1  
d1fxza2 d1fxza1 d1uija1 g1dgw.1 d2v09a\_ d1uika2 d1uika1 d1dgwa\_  
d1ep0a\_ d2pa7a1 d1wlta1 d2c0za1 d1tafa\_ d1bh9b\_ d1tafb\_ d1jfib\_  
d1h3ob\_ d2byka1 d1n1ja\_ d4g92b\_ d1bh9a\_ d1jfia\_ d1h3oa\_ d2bykb1  
d1n1jb\_ d1h32a1 d2bjca1 d2hsga1 d1qpza1 d1efaa1 d1mqta\_ d1d4m3\_  
d1fmd3\_ d2mev1\_ g1aym.1 d1ev13\_ d4q4w1\_ d1r1a3\_ d2x5ia\_ d1rhi1\_  
g1r1a.1 g1d4m.1 g1rhi.1 d1b35b\_ d1loopa\_ d1tme1\_ d4iv1a\_ g1pvc.1  
g1fnp.1 d1fnp1\_ d4gb31\_ d1d4m1\_ d1fmd1\_ d1ev11\_ d2wzr3\_ g1cov.1  
d1qqp3\_ g1fmd.1 d2x5ic\_ d1rhi3\_ g1oop.1 d1hxs1\_ d1fnp3\_ d1bev1\_  
g2mev.1 d1eah3\_ d1aym1\_ d1pvc3\_ d1qqp1\_ d1zba3\_ d1h8ta\_ d3vbhc\_  
g1b35.1 g1bev.1 d1hxs3\_ g1ev1.1 d1bev3\_ g1tmf.1 d1tmf1\_ d1b35a\_  
d2mev3\_ g1eah.1 g1h8t.1 d1eah1\_ d4q4w3\_ d1r1a1\_ d1aym3\_ d1pvc1\_  
d1zba1\_ d1h8tc\_ d1oopc\_ d1tme3\_ g1qqp.1 d4iv1c\_ g1tme.1 d1r0ka3  
d1vkoa2 d1vm6a2 d3qvsa2 d1gr0a2 d1p1ja2 d2ovga\_ d1sq8a\_ d1rzsa\_  
d3kz3a\_ d3orca\_ d3gpdg2 d2q49a2 d1hdgo2 d2g17a2 d2cvoa2 d2czca1  
d3pwka2 d1obfo2 d1i32a2 d1zyao2 d2pkqo2 d1b7go2 d2hjsa2 d1cf2o2  
d1vkna2 d1nvmb2 d1lux8a\_ d1dlya\_ d4i0va\_ d2bkma\_ d1dlwa\_ d2bmma\_  
d2msya\_ d2djoa1 d2r5za\_ d1au7a1 d1f43a\_ d2lmda1 d1akhb\_ d1s7ea1  
d3nara\_ d1zq3p1 d2craa1 d1mija\_ d4uuta\_ d3a01a\_ d1x58a1 d3rkqa1  
d3cmya1 d2cqxa1 d2da6a1 d1e3oc1 d1fjla\_ d1mh3a1 d1ig7a\_ d1x41a1  
d1wh7a1 d1gt0c1 d2mw8a\_ d1lfup\_ d1x2ma1 d1b72a\_ d1wi3a1 d1jgga\_  
d1wjha1 d1x2na1 d1mnm\_ d2cuea1 d3k2aa\_ d2hosa\_ d2jwta2 d1pufa\_  
d1octc1 d2hi3a\_ d1b8ia\_ d4j19a\_ d3lnqa\_ d1wh5a1 d1b8ib\_ d1hcra\_  
d1tc3c\_ d1gdta1 d1u78a2 d6paxa1 d6paxa2 d1k78a2 d1hlva2 d1iufa2  
d1iufa1 d2iu5a1 d1zk8a1 d2g7sa1 d2fd5a1 d2np5a1 d1z0xa1 d2id6a1  
d2d6ya1 d2i10a1 d1vi0a1 d2oi8a1 d3c07a1 d2ns7a1 d2fq4a1 d2yvea1  
d1t33a1 d2o7ta1 d1rkta1 d2np3b1 d2g7ga1 d2gena1 d2fbqa1 d2g7la1  
d2gfna1 d2g3ba1 d2jj7a1 d2hyja1 d1sgma1 d1ui5a1 d2hkua1 d2id3a1  
d4jyka1 d3ubub\_ d1legia\_ d1qo3c\_ d1v7pa\_ d1tdqb\_ d3ubua\_ d1c3ab\_  
d1h8ua\_ d3bx4b\_ d1t8ca1 d1sb2a1 d1qdda\_ d2ziba1 d3cada\_ d1byfa\_  
d1j34b\_ d1jwia\_ d1jzna\_ d1c3aa\_ d1oz7b\_ d1wmza\_ d3bdwb\_ d1hq8a\_  
d1fifa1 d1dv8a\_ d3hupa\_ d1wk1a1 d1umra\_ d2afpa\_ d3bx4a\_ d1gz2a\_  
d1sl6a\_ d1v7pb\_ d3g8ka\_ d1ixxa\_ d1j34a\_ d1jwib\_ d1g1sa1 d1y17a1  
d1ja3a\_ d1fvub\_ d3bdwa\_ d1sb2b1 d1fvua\_ d1umrc\_ d1oz7a\_ d4m17a\_  
d3cfwa1 d1ypqa1 d1g1ta1 d3fd4a\_ d3l9jc\_ d4dn8a1 d1v4lb\_ d2msba\_  
d3lv8a\_ d1s3ga1 d1zaka1 d1s4qa\_ d3tvta2 d1uf9a\_ d1khta\_ d1ckea\_  
d1osna\_ d1p5zb\_ d4tmka\_ d3cm0a\_ d1tmka\_ d1jaga\_ d3h86a\_ d1t0hb\_  
d1nn5a\_ d2h92a\_ d3kb2a1 d2c95a1 d1yj5a2 d1kgda\_ d1ly1a\_ d2ak3a1  
d1vyva2 d1deka\_ d2grja1 d1p3ja1 d1y63a\_ d1e4ya1 d1s96a\_ d3iija1  
d1lvga\_ d1nksa\_ d1vyua2 d4e22a\_ d1qf9a\_ d1q3ta\_ d1ki9a\_ d1lw7a2  
d1teva\_ d1kjwa2 d1gsia\_ d2iyva2 d1kaga\_ d1viaa\_ d1g3ma\_ d1j99a\_  
d1t8ta1 d1nsta\_ d1zrha\_ d1ls6a\_ d2a3ra\_ d1aqua\_ d2zptx\_ d3ckla\_

d1texa\_ d1q44a\_ d2gwha\_ d1lodfa\_ d1luj2a\_ d4gi7a\_ d2jeoa1 d1z0ja1  
d3umra2 d3gj0a1 d2gaoa1 d1yzga1 d1x3sa1 d1g7sa4 d1puja\_ dludxa2  
d1kk1a3 d2o52a\_ d1jwyb\_ d1zcaa2 d1zcba2 d2fv8a1 d2cjwa\_ d3dz8a1  
d1xzpa2 d1vg8a\_ d4qxaa\_ d2ew1a1 d1x1ra1 d2bcgy\_ d3doea1 d3cona\_  
d3rega\_ d3wyga\_ d1upta\_ d2b6ha1 d1zd9a1 d1lnza2 d1r5ba3 d1n0ua2  
d1r2qa\_ d2f91a1 d2rhda\_ d3q3jb\_ d3q85a\_ d1efma1 d1r8qa\_ d2gf9a1  
d2akab1 d1ek0a\_ d1z08a1 d2gcoa1 d2dyla2 d4g01b\_ d2cxxa1 d1svia\_  
d3q72a\_ d1ni3a1 d4ac9a4 d2erxa1 d2bmea\_ d1wxqa1 d2gf0a1 d4ldja1  
d1zunb3 d1d5ca\_ d41v5b\_ d1efca3 d1kmqa\_ d2g6ba1 d3lrpa\_ d1tada2  
d2y8ea\_ d4rd4a1 d1z06a1 d2heia\_ d3a58b\_ d1u01a2 d1d2ea3 d1zj6a1  
d2ocba\_ d3rwoa\_ d1mr3f\_ d2e9sa1 d4u5xa1 d2iwra\_ d2fn4a1 d3bwdd\_  
d2nzja1 d2atva1 d2ksqa\_ d3l43a\_ d1mkya2 d1mkya1 d1wmsa\_ d1jnja3  
d2rmka\_ d1f6ba\_ d1f60a3 d1gota2 d1jala1 d2fh5b1 d1g16a\_ d2wblc\_  
d1m7ba\_ d1wf3a1 d1f5na2 d1t9ha2 d1z6xa1 d1z0aa1 d2fg5a1 d2a5ja1  
d2bcjq2 d1s0ua3 d1ky3a\_ d4y0va\_ d4lhwa\_ d2qmea1 d2atxa1 d1egaa1  
d1ryha\_ d1moza\_ d1nrjb\_ d2erya1 d3bfka\_ d1puia\_ d3j3az1 d3t5ga\_  
d1shza2 d3defa\_ d2f7sa1 d3raba\_ d3tsoa\_ d3aq4a\_ d2a17a1 d3sfva1  
d3bc1a\_ d2ncda\_ d1sdma\_ d3h4sa1 d2heha\_ d2grya\_ g3kin.1 d1kk8a2  
d1br2a2 d1goja\_ d1f9va\_ d2mysa2 d1lkxa\_ d3t0qa\_ d4db1a1 d3gbja\_  
d1ry6a\_ d1k8ka2 d1k8ka1 d3uleb1 d3i33a2 d3i33a1 d1bupa1 d1dkgd2  
d4ci6a2 d1jcfal d4a2ba2 d2fxua1 d1yaga2 d1yaga1 d4cbua2 d1bupa2  
d1g99a1 d2e1za2 d2e1za1 d1saza1 d1saza2 d1czan2 d1czan3 d1czan1  
d1lig8a2 d1czan4 d1bg3a4 d1bg3a3 d1bg3a2 d1bg3a1 d2d0oa3 d2d0oa2  
d1nbwa2 d1hroa\_ d4gedb\_ d3zooa\_ d1mz4a\_ d1gu2a\_ d1f1fa\_ d1dvva\_  
d1c6ra\_ d1c75a\_ d1e29a\_ d1gdva\_ d1cnoa\_ d1h32b\_ d1co6a\_ d2bh4x\_  
d2aiua\_ d5cytr\_ d1jdl\_ d1i8oa\_ d2zboa\_ d3dmia\_ d1ls9a\_ d1wvec\_  
d2yk3a\_ d3ph2b\_ d1dw0a\_ d5aura\_ d1ql3a\_ d1qn2a\_ d1f1ca\_ d2nqya\_  
d1h4ga\_ d1hixa\_ d1loa2a\_ d1olra\_ d3b7ma\_ d4h7ma1 d3wp3a\_ d2vgda\_  
d1ligoa\_ d3zsea\_ d2nlra\_ d3wx5a\_ d1oa3a\_ d1pvxa\_ d1m4wa\_ d1f5ja\_  
d1oa4a\_ d1ks5a\_ d4ix1a1 d2ah2a1 d1n1ta1 d1evsa\_ d1cnt1\_ d1pvhb\_  
d1z7ca\_ d1huwa\_ d1bgea\_ d1rhga\_ d1f6fa\_ d1f45b\_ d1i1rb\_ d1axia\_  
d4x51a\_ d1d9ca\_ d4ypgc1 d3oq3a\_ d1lqsl\_ d1n1fa\_ d1aula\_ d1wu3i\_  
d3bes1\_ d3ux9a\_ d2ejca\_ d3muea1 d1lihoa\_ d3q12a1 d3rbaa\_ d2qtra\_  
d1nupa\_ d3l92a\_ d1f9aa\_ d1qjca\_ d2h29a\_ d1vlha\_ d1lod6a\_ d1lw7a1  
d1mrza2 d4ruka\_ d3wdpp1 d3wq5a\_ d1gnxa\_ d4gxpa\_ d4hz8a\_ d1e4mm\_  
d3aiua\_ d1wcca1 d1qvba\_ d3ahxa\_ d1v02a\_ d2dgaa\_ d1pbga\_ d1vffa1  
d1qoxa\_ d4ha4a\_ d2e17a\_ d1iq0a2 d1irxa2 d1r6ta2 d1liva4 d2cyba\_  
d1rqga2 d1j09a2 d2yxna\_ d1f7ua2 d1ffya3 d2g36a1 d1nzja\_ d1jlila\_  
d1n3la\_ d1i61a\_ d1pfva2 d1h3na3 d3n9ia\_ d3sz3a1 d3sw2a\_ d1moxc\_  
d1dx5i3 d1edmb\_ d1aut12 d1aut11 d1nqlb\_ d1dva11 d1szba2 d1kigl\_  
d2y5f1\_ d1ijqa2 d1gk5a\_ d1gl1sa2 d1nt0a3 d1xdtr\_ d1lmja2 d1lmja1  
d1nzia2 d2wphe\_ d1klil\_ d1pfx12 d1pfx11 d1p9ja\_ d1gl1ta2 d1f7ea\_  
d4yzub\_ d2mgpa1 d1b9wa1 d2mgpa2 d1ob1c1 d1ob1c2 d1n1ia2 d1n1ia1  
d2npra2 d2npra1 d2y5ia\_ d1qlsa\_ d1psra\_ d3n22a\_ d2egda\_ d4ggfc\_

d2wcea\_ d2luca\_ d4aqia\_ d3nsia\_ d2lp3a\_ dlj55a\_ d1a4pa\_ d1k8ua\_  
d1nsha\_ d1pvaa\_ d3fs7a\_ d2pvba\_ d1ttxa\_ d1rwy\_ d2kyfa\_ d1rk9a\_  
d1a75a\_ d1exra\_ d1tiza1 d1nyaa\_ d1g8ia\_ d1ggwa\_ d1wdcc\_ d3fwba\_  
d1ggza\_ d2o5ga\_ d1ctaa\_ d1m45a\_ d3i5gc\_ d1sl8a\_ d1fpwa\_ d2scpa\_  
d2roaa\_ d4aqra\_ d3pn7b\_ d1br1b\_ d2mysb\_ d1s6ca\_ d1bjfa\_ d2obha\_  
d1jfka\_ d1jf0a\_ d1qv0a\_ d1lkja\_ d2mlfc\_ d2m97a\_ d2d8na\_ d4by5a\_  
d1jbaa\_ d4nqga\_ d1wdcb\_ d2mysc\_ d1j7qa\_ d1s6ia\_ d1uhka2 d1r2ua\_  
d1dtla\_ d3kf9a\_ d3pn7c\_ d1gjya\_ d1y1xa\_ d1hqva\_ d1dvia\_ d1qxp2  
d4usla\_ d1k94a\_ d1wkya2 d1uuqa\_ d3wh9a\_ d4mlra\_ d1xyza\_ d4xuya\_  
d2je8a5 d4bf7a1 d3cuia\_ d1ur4a\_ d1qw9a2 d1odza\_ d2vzsa5 d1bqca\_  
d2x2ya1 d1qnra\_ d4y7ea1 d1vjza\_ d4k68a\_ d2v3ga\_ d4hpga\_ d1nofa2  
d1nq6a\_ d1h4pa\_ d1aq0a\_ d3ziza\_ d4bs0a\_ d1ecea\_ d1h1na\_ d1ta3b\_  
d1w91a2 d1ilwa\_ d1uhva2 d1us3a2 d1legza\_ d7a3ha\_ d1tvna1 d3nyda1  
d1ghsa\_ d2cyga1 d4xv0a\_ d2c8na2 d1w32a\_ d3emca\_ d1v6ya1 d1foba\_  
d2uwfa1 d2fgla\_ d3niya1 d2c0ha1 d1rh9a1 d1yq2a5 d1szna2 d1fa2a\_  
d1pama4 d5do8a1 d1ea9c3 d1hx0a2 d2fhfa5 d1qhoa4 d1avaa2 d1m53a2  
d4m8ua1 d2gjpa2 d1lwha2 d4howa1 d1ktba2 d1j0ha3 d3vm5a1 d2x1ia\_  
d1wzaa2 d1uasa2 d2diea1 d1mxga2 d1ht6a2 d1eswa\_ d1liv8a2 d5cpsa\_  
d1ud2a2 d1zjaa1 d3gbea1 d1kwga2 d1wdpa\_ d1gcya2 d1g5aa2 d3dhpa2  
d2bhua3 d4do4a1 d3qgva1 d1e43a2 d1g94a2 d2d3na2 d1gjwa2 d1gvia3  
d1x1na1 d1r7aa2 d1tz7a1 d4toqa\_ d1wb0a1 d1w9pa1 d1itxa1 d1kfwal  
d1goia2 d1edqa2 d2gsja\_ d1hjxa1 d1jnda1 d1vf8a1 d1etob\_ d1umqa\_  
d1g2ha\_ d3syxa1 d1mkea1 d2p8va\_ d1xoda1 d1i7aa\_ d1qc6a\_ d1legxa\_  
d2v76a\_ d1wj1a1 d1aqca\_ d1qqga1 d1ntva\_ d1n3ha\_ d4dbba\_ d3f0wa1  
d1p3ra\_ d1wgua1 d2cy4a1 d3hqca\_ d1wvha1 d1xr0b1 d3nvva1 d1krha3  
d2h88b1 d1n62a2 d1t3qa2 d1kf6b2 d1zoyb1 d1jq4a\_ d1dgja2 d1rm6c2  
d9ldta1 d2ewda3 d1up7a1 d2dfda1 d1s6ya1 d1vjta1 d7mdha1 d1hyea1  
d1t2da1 d1ojsa3 d1b8pa1 d1ldna1 d1hyha1 d1civa1 d2a92a1 d1ez4a1  
d1i0za1 d1y6ja1 d1gv0a1 d1ur5a1 d1llda1 d1obba1 d1v8ba1 d1gdha1  
d1l7da1 d2dllda1 d1ygya1 d1qp8a1 d1li4a1 d1j4aa1 d2naca1 d1npya1  
d3t4ea2 d1a4ia1 d1o0sa1 d2hk9a2 d2egga2 d1b26a1 d1bvua1 d1gq2a1  
d1clda1 d1leha1 d1gtma1 d1euza1 d1nvtal d3dona2 d1ledza1 d1vi2a1  
d1p77a1 d1nyta1 d1b0aa1 d1vl6a1 d1v9la1 d1txga2 d3f47a1 d1mv8a2  
d2pv7a2 d1xc2a3 d2ahra2 d4xiya1 d2f1ka2 d1pgja2 d1i36a2 d1np3a2  
d1lj8a4 d1teaa3 d1qmg2a d2i76a2 d2g5ca2 d1wdka3 d1dlja2 d3cuma3  
d1kola2 d1f8fa2 d1qora2 d1jqba2 d1vj0a2 d1cdoa2 d1gu7a2 d1d1ta2  
d1xa0a2 d2dm6a2 d1jvba2 d1rjwa2 d1llua2 d1h2ba2 d1tt7a2 d1piwa2  
d1o89a2 d1liz0a2 d1e3ja2 d1yb5a2 d1uufa2 d1e3ia2 d3gpdg1 d1vc2a1  
d2nvwa1 d1u8fo1 d1ydwa1 d1hdgo1 d2g17a1 d1cf2o1 d2czca2 d1r0ka2  
d1obfo1 d2cvoa1 d1ebfa1 d1h6da1 d1i32a1 d1zh8a1 d2q49a1 d1qkia1  
d1j5pa4 d3pzra1 d1xeaa1 d1vkoa1 d1vm6a3 d3qvsa1 d2pkqo1 d1b7go1  
d1gr0a1 d1p1ja1 d1lc0a1 d1j0xo1 d3pwka1 d2hjsa1 d1zyao1 d1vkna1  
d1t1ta1 d1nvmb1 d3sjua\_ d3ojfa1 d1xu9a1 d2jjya1 d1n7ha\_ d1y1pa1  
d1h5qa\_ d1jtva\_ d4fs3a\_ d2bkaa1 d1gy8a\_ d2c5aa1 d1ulsa\_ d1loea\_

d2b69a1 d1y5ma1 d1spxa\_ d1ae1a\_ d1bxka\_ d1ydea1 d1gega\_ d1hdoa\_  
d1o5ia\_ d1e6ua\_ d1snya1 d2rhca\_ d3zv4a\_ d5ceja\_ d2d1ya1 d1fjha\_  
d3w8ea\_ d2fmua1 d1x1ta\_ d1rpna\_ d3ay7a1 d1k2wa\_ d1eq2a\_ d2hrba1  
d3ruaa\_ d2ew8a1 d4hwka\_ d1xgka\_ d2bd0a1 d1yo6a1 d2a35a1 d2ntva\_  
d1vl8a\_ d1hdca\_ d4bkua\_ d2ag5a1 d2q45a\_ d1nffa\_ d4iy1a\_ d1zbqa1  
d1kewa\_ d1ek6a\_ d1ja9a\_ d2q46a2 d1iy8a\_ d1cyda\_ d2ptga\_ d1hxha\_  
d1uzma1 d3lyla\_ d4m89a\_ d3wyea\_ d2b11a1 d1w6ua\_ d1sb8a\_ d2q2va\_  
d4nr0a\_ d1e6wa\_ d2gasa\_ d3oiga1 d2bgka1 d1mxha\_ d1vl0a1 d1rkxa\_  
d1r6da\_ d1wmaa1 d1e7wa\_ d2c07a1 d1xkqa\_ d3tzha\_ d1g0oa\_ d3lz6a\_  
d1qyca\_ d1edoa\_ d1gz6a\_ d1oc2a\_ d1t2aa\_ d1zema1 d2xoxa\_ d1z45a2  
d1geea\_ d1p33a\_ d31t0a\_ d4e6pa\_ d2wyua\_ d1db3a\_ d4q9na\_ d1xhla\_  
d4o1ma\_ d1fmca\_ d2uvda\_ d2gdza1 d1uaya\_ d2z1ma\_ d2o23a2 d2fr1a2  
d2fr1a1 d1qsga\_ d4zjua\_ d2a4ka1 d1yb1a\_ d1wvga1 d1yxma1 d3f4ba\_  
d1mg5a\_ d1xg5a1 d1r55a1 d3gboa\_ d1atla\_ d1kufa\_ d4q11a\_ d1quaa\_  
d1yp1a\_ d1wnia\_ d2gfoa1 d1vjva\_ d2ayna1 d3nhea\_ d1qxp4 d1ziva1  
d1zcmal d1t3ca\_ d1epwa3 d2a97a\_ d3fiea\_ g1e1h.1 d3ioqa\_ d1fh0a\_  
d1o0ea\_ d1khqa\_ d1m6da\_ d2cb5a\_ g8pch.1 d1s4va\_ d2pnsa\_ d1vsna1  
d1mira\_ d1liwda\_ d2oula\_ d7pcka\_ d3bwka\_ d3bcna\_ d2p86a\_ d1pvja\_  
d1pcia\_ d1gece\_ d1deua\_ d4bs6a\_ d1xkga1 d1cqda\_ d1jppa2 d2c0ya\_  
d2bdza\_ d3p5ua\_ d1zoya1 d1qo8a2 d1d4ca2 d1chua2 d1jnra2 d1kf6a2  
d2jk6a2 d2jk6a1 d1fecal d1fecal d1lpfa1 d1lpfa2 d1xhca1 d1xhca2  
d1dxla2 d1dxla1 d1gera2 d1m6ia2 d1onfa1 d3lada2 d3lada1 d1w4xa1  
d1w4xa2 d1gesa2 d1mo9a1 d1xdia1 d1fl2a2 d1fl2a1 d1fcda1 d1fcda2  
d1h6va2 d1h6va1 d1mo9a2 d1gv4a2 d1gv4a1 d2gv8a2 d2gv8a1 d1aoga1  
d1aoga2 d1hyua1 d1ebda1 d1ebda2 d3dk9a1 d1q1ra2 d1q1ra1 d1gesa1  
d1w5qa\_ d2c1ha\_ d1ohla\_ d1l6sa\_ d1zbfal d2z1ha\_ d2etja1 d3qioa1  
d1j11a\_ d2e41a\_ d1j12a\_ d2lsna1 d1lio2a\_ d1uaxa\_ d2yv0x\_ d1mu2a1  
d1ekea\_ d1pn0a1 d1reoal d1ju2a1 d2f5va1 d3c96a1 d2gmha1 d1pj5a2  
d1gpea1 d1n4wa1 d1k0ia1 d2dw4a2 d2ivda1 d1seza1 d2voual d1kdga1  
d1s5ja1 d2hbja2 d2igia\_ d1wlja\_ d1qhta1 d4dlea1 d1tgoa1 d2f96a1  
d3tr8a1 d3mxma\_ d1q8ia1 d1y97a1 d1w0ha\_ d1kfsa1 d2py5a1 d1noya\_  
d1d5aa1 d1yt3a3 d2guia\_ d3mwpal d4kb1a\_ d1iv0a\_ d1nu0a\_ d1js9c\_  
d1f15b\_ d1za7a\_ d1laja\_ d1b9ra\_ d1offa\_ d1frfa\_ d3wcqa\_ d1e9ma\_  
d1l5pa\_ d1wria\_ d1i7ha\_ d3av8a\_ d1czpa\_ d1rfka\_ d3p1ma1 d3b2ga\_  
d2bt6a2 d1wgqa1 d1v89a1 d2coda1 d1zc3b\_ d1wg7a1 d1u5ea1 d1v61a1  
d2coca1 d2ys1a1 d1v5pa1 d1ntya2 d1wjma1 d1wila1 d1u29a\_ d1xx0a1  
d1unqa\_ d2zkmx3 d1fhoa\_ d1v88a1 d2adza1 d1x1fa1 d1p6sa\_ d2coaa1  
d1btka\_ d1v5ma1 d1faoa\_ d2x18a\_ d1dyna\_ d1x1ga1 d4kaxb\_ d2j59m1  
d1ki1b2 d1xcga2 d1txda2 d1u5da1 d1dbha2 d1wlha\_ d1upqa\_ d1v5ua1  
d1foea2 d2fjla1 d1eaza\_ d2dfka2 d2cofa1 d1kz7a2 d1r7ha\_ d1faaa\_  
d1wika1 d1xfla\_ d1ttza1 d2f51a1 d1ti3a\_ d1nhoa\_ d1sena\_ d2i4aa\_  
d1ep7a\_ d1zmaa1 d3lefa1 d3diea1 d2yana1 d1z6na1 d1oaza\_ d3zywa1  
d4aj8a\_ d1nm3a1 d4fiwa\_ d1wmja\_ d4hs1a1 d1iloa\_ d1xwaa1 d1wjka1  
d2vm1a\_ d1fb6a\_ d1gh2a\_ d1h75a\_ d1nw2a\_ d1kx5b\_ d3a6na\_ d4m6ba2

d2nqbd\_ d3wkjd\_ d2yfwe\_ d4h9na\_ d5bnxa\_ d1kx5c\_ d3r45a\_ d1eqzb\_  
d4jjnb\_ d1f66c\_ d1eqza\_ d4wnnb\_ d1kx5a\_ d1u35c1 d1id3a\_ d2nqbc\_  
d1kx5d\_ d2b5ea2 d2b5ea3 d2b5ea1 d2b5ea4 d2kp1a1 d2kp2a1 d1hyua3  
d1hyua4 d1j08a1 d1j08a2 d1pd212 d1nhya2 d2a2ra2 d1k0dd2 d1f2ea2  
d1gsua2 d1f3ba2 d2fhea2 d2pvqa1 d1tw9a2 d1oyja2 d1e6ba2 d3ik7a1  
d4is0a1 d1r5aa2 d1j1va2 d1m0ua2 d3gtub2 d1z9ha2 d1okta2 d1axda2  
d2gsra2 d1tu7a2 d1k3ya2 d1zgma1 d1b48a2 d1gnwa2 d1gwca2 d2gsta2  
d1glqa2 d1oe8a2 d1pn9a2 d1v2aa2 d1fw1a2 d1duga2 d1iqca2 d1iqca1  
d1eb7a2 d1eb7a1 d1nmla2 d1741a\_ d1691a\_ d2o4wa\_ d1p37a\_ d1k28a3  
d1xjta1 d1jtma\_ d2f2qa\_ d4e97a1 d1g4ma1 d1g4ma2 d1iyka1 d1rxta1  
d1iica2 d1iica1 d2za0a\_ d2c21a1 d1f9za\_ d2pjsa1 d2i7ra1 d1ecsa\_  
d1xqaa1 d5cj3a1 d1npba\_ d1jifa\_ d2p7oa\_ d1r9ca\_ d1nkia\_ d1mpya2  
d1kw3b2 d1kw3b1 d4ghga1 d1tfza1 d3isqa1 d3isqa2 d1sqia1 d1sqia2  
d1lkda2 d1lkda1 d1mpya1 d1cjxa1 d1sp9b2 d1t47a1 d1t47a2 d1f1ua2  
d1sp8a1 d1sp8a2 d1f1ua1 d4iuua3 d4bvva\_ d5hpga\_ d3k65a\_ d1ki0a3  
d1ki0a1 d1a0ha1 d1pmla\_ d3sp8a3 d2feba1 d1qsta\_ d2beia1 d4m3sa\_  
d1u6ma1 d1ygha\_ d1yk3a1 d3dr6a\_ d1xmta\_ d1z4ea1 d2ge3a1 d1bo4a\_  
d2fiaa1 d2jdca1 d1y9wa1 d3to7a\_ d1lwza1 d2fl4a1 d2ozua1 d2b5ga\_  
d2cy2a1 d2p0wa\_ d1cm0a\_ d4pswa\_ d1yrea1 d1yr0a1 d1m4ia\_ d2gana1  
d1yvka1 d1ghea\_ d2g3aa1 d1y7ra1 d2eulia1 d1q2ya\_ d2fsra1 d1xeba\_  
d2ae6a1 d1cjwa\_ d1qsma\_ d2aj6a1 d1y9ka1 d1i12a\_ d1vkca\_ d2atra1  
d1n71a\_ d2d4pa1 d2fiwa1 d2fe7a1 d1tiqa1 d2ou2a\_ d1yx0a1 d2fcka1  
d1p0ha\_ d2j8ma\_ d2pq8a\_ d1z4ra1 d1s3za1 d1ufha\_ d1xvqa1 d1pn0a2  
d3hy2a\_ d2cvba1 d1o8xa\_ d1lu4a\_ d1we0a1 d2bmx1 d2a4va1 d1psqa\_  
d1xiya1 d1q98a\_ d1n8ja\_ d1zofa1 d2ggta\_ d3tjja\_ d4je1a1 d1o73a\_  
d3s9fa\_ d2zcta\_ d1qmva\_ d1jfua\_ d2b1ka\_ d5dvba1 d2b5xa1 d2v2ga\_  
d1st9a\_ d3tb2a\_ d411ra\_ d4fh8a1 d1e2ya\_ d1knga\_ d2h30a\_ d1i5ga\_  
d2z9sa\_ d2f8aa1 d1tp9a1 d2b7ka\_ d1nm3a2 d3hvva\_ d2wfca1 d4kcea\_  
d1xvwa1 d4gqca1 d3qpma\_ d4k1fa\_ d1zzoa1 d1gp1a\_ d1prxa\_ d4od7a1  
d1z6ma1 d4mcua1 d4dvca1 d3l9sa\_ d1un2a\_ d3rppa\_ d2m5ta\_ d1cqqa\_  
d1wqsa\_ d5bpea\_ d2ipha\_ d1lvoa\_ d2bhga1 d3tnta\_ d3sjia\_ d3d23a1  
d2fyqa\_ d3tloa\_ d3zvea1 d2hrva\_ d3q3ya1 d4asha1 d1etha2 d1w52x1  
d2ppla1 d1hpla2 d1lpbb2 d2oxea1 d1bu8a2 d1rpla2 d1bnla\_ d1dy2a\_  
d1ra6a\_ d1muka\_ d3gsza\_ d1khva\_ d1te9a\_ d2xwha\_ d3uqsa\_ d3hkwa\_  
d3n6ma\_ d2cjqa\_ d2xyma\_ d1teba\_ d1te8a\_ d1u09a1 d4wfxa\_ d3tyqa\_  
d2pgga1 d1lgya\_ d4l3wa\_ d1llfa\_ d1gz7a\_ d1lukca\_ d1c4xa\_ d1jl1a\_  
d2rhwa\_ d3groa\_ d1pjaa\_ d1thta\_ d1svpa\_ d1mbma\_ d3su6a1 d1cula1  
d4agka\_ d1vcpa\_ d1q31a\_ g1n11.1 d3e90b\_ d1ep5a\_ d3u1jb\_ d3zxha\_  
d1cgla\_ d1rm8a\_ d1eaka2 d1hy7a\_ d2jsda\_ d1cxva\_ d1hv5a\_ d1eb6a\_  
d3p0ya1 d1igra1 d1igra2 d1n8yc2 d1n8yc1 d1m6ba2 d1m6ba1 d1m4la\_  
d2bk7a\_ d3fjua\_ d1z5ra1 d1kwma1 d1uwya2 d1jqga1 d2c1ca1 d1h81a2  
d1lmra\_ d1ddla\_ d1e57b\_ d1auyb\_ d1rmka\_ d1ixta\_ d1eyoa\_ d1cnna\_  
d1fu3a\_ d1glpa\_ d1fyga\_ d1rypd\_ d1irua\_ d1rypc\_ d3unfk\_ d1rypa\_  
d1j2pa\_ d1irui\_ d1j2qh\_ d3unfh\_ d1m4ya\_ d1rypb\_ d1irul\_ d1irug\_

d1iru2\_ d1q5rh\_ d1rypg\_ d1g3ka\_ d1q5qa\_ d1e94a\_ d1irub\_ d1ryph\_  
d3ty6a\_ d1iruj\_ d1iruk\_ d1rype\_ d1irud\_ d1irue\_ d3mi01\_ d1rypf\_  
d1iruh\_ d2z3ba\_ d1iruc\_ d3mka2\_ d1iru1\_ d1ny721\_ d1a6ca3\_ d1a6ca2  
d1a6ca1\_ d1pgl22\_ d1pgl21\_ d1pgl11\_ d1ny711\_ d1jgta2\_ d1ofda3\_ d1ea0a3  
d1ecfa2\_ d1q15a2\_ d1ct9a2\_ d1te5a\_ d1ju8a\_ d4w9ta\_ d4x2ra1\_ d1ka9f\_  
d1qo2a\_ d4axka1\_ d1thfd\_ d1h5ya\_ d4u28a\_ d2y88a\_ d4wd0a\_ d1vzwa1  
d1eixa\_ d3exra\_ d2ffca1\_ d2fdsa1\_ d3n3ma1\_ d2czda\_ d1q6oa\_ d2yyua\_  
d1vqta1\_ d1dbta\_ d3ldva1\_ d4lt9a1\_ d3tc7a1\_ d3hoja\_ d1i4na\_ d3vnda\_  
d3n18a1\_ d1geqa\_ d3naval\_ d1v5xa\_ d4a2ra1\_ d3tc6a1\_ d4ijba\_ d1xcfa\_  
d1vc4a\_ d1rd5a\_ d1qopa\_ d3b5va\_ d2r80b\_ d1cqxa1\_ d1cg5a\_ d1gcvb\_  
d3boma\_ d2h8fb\_ d2raoa\_ d3bj1a\_ d4hrrb\_ d2r50a\_ d3d1kb\_ d2aalb1  
d3zhwa\_ d3hf4b\_ d3gdja\_ d1jebb\_ d3bj1b\_ d1x9fb\_ d1wmub\_ d1gcva\_  
d3bcqb\_ d3d4xb\_ d1gvha1\_ d2dc3a\_ d3hf4a\_ d4yu3a\_ d3k8ba\_ d1qpwb\_  
d2r80a\_ d3bcqa\_ d1v4wa\_ d3wtgb\_ d1j17a\_ d4esaa\_ d1a9we\_ d3d1ab\_  
d1fsla\_ d4h21a\_ d1v4wb\_ d1mwca\_ d1vhba\_ d1jeba\_ d1spgb\_ d1h97a\_  
d1q1fa\_ d1tu9a1\_ d3d1aa\_ d1hdsb\_ d3hyub\_ d2zfb\_ d3fs4a\_ d1oj6a\_  
d1shrb\_ d4h21b\_ d4yu3b\_ d1spga\_ d3hrwa\_ d3qgra\_ d3at5a\_ d4wchd\_  
d3hyua\_ d1cg5b\_ d1uc3a\_ d1hbra\_ d2raob\_ d1outb\_ d4esab\_ d3gdjb\_  
d3qqqa\_ d1x9fc\_ d3vrfa\_ d1litha\_ d3mkba\_ d3d4xa\_ d3mjpa\_ d1j16a\_  
d3fh9a\_ d1outa\_ d2dc3b\_ d1it2a\_ d3eoka\_ d3g46a\_ d1qpwa\_ d3vrfb\_  
d1x9fd\_ d1hdsa\_ d2zfb\_ d3mkbb\_ d1or4a\_ d3wtga\_ d1a4fa\_ d3fh9b\_  
d3bomb\_ d3cy5a\_ d3at5b\_ d1x9fa\_ d2oifa\_ d4lmb\_ d1cpcb\_ d3v57a\_  
d1kn1a\_ d1cpca\_ d4f0ta\_ d2vjha\_ d4po5b\_ d1eyxa\_ d1alla\_ d4f0tb\_  
d1b33b\_ d1b8db\_ d4h0mb\_ d1b33a\_ d2vjhb\_ d4lmb\_ d2vmlb\_ d1allb\_  
d2vjta\_ d3dbja\_ d2vmla\_ d2vjtb\_ d4f0ub\_ d1f99b\_ d4rmpa1\_ d1liaa\_  
d1eyxb\_ d2uulb\_ d4lmsb\_ d4f0ua\_ d2bv8a\_ d1f99a\_ d2bv8b\_ d2c71b\_  
d3dbjb\_ d4rmpb1\_ d1b8da\_ d4h0ma\_ d3v57b\_ d1kn1b\_ d1liab\_ d2uula\_  
d2j96a\_ g1gxs.1\_ g1wht.1\_ d1azwa\_ d1k8qa\_ d2xqfa\_ d1f6wa\_ d1dx4a\_  
d1qe3a\_ d1k4ya\_ d4qwwa\_ d2ha2a\_ d1r88a\_ d1sfra\_ d4qeka\_ d3c8da2  
d2pbla1\_ d1jjia\_ d1lzl1a\_ d1jjfa\_ d1xm5a\_ d1xaxa\_ d1tvia\_ d1s5ja2  
d4dlea2\_ d1tgoa2\_ d3py8a2\_ d1q8ia2\_ d1kfsa2\_ d2py5a2\_ d1d5aa2\_ d1dosa\_  
d1gvfa\_ d3qm3a1\_ d2fjka\_ d1f74a\_ d3l21a\_ d2e1da\_ d1to3a1\_ d1w3ia\_  
d1sfla\_ d1n7ka\_ d1vcva1\_ d4imea\_ d1wa3a\_ d2ocza1\_ d1f2ja\_ d3m16a\_  
d2yxga\_ d1ub3a\_ d3a5fa\_ d1fbaa\_ d1l6wa\_ d1xfba1\_ d1wx0a1\_ d1vpxa1  
d1ojxa\_ d1mxsa\_ d2a4aa1\_ d1xkya1\_ d3cq0a1\_ d3s1xa\_ d1f05a\_ d1fdja\_  
d3cpra1\_ d4d2ja\_ d1e88a1\_ d1l6ja5\_ d1l6ja4\_ d1eaka4\_ d1eaka3\_ d1l6ja3  
d1h8pa2\_ d1h8pa1\_ d3rp2a\_ g1lucy.1\_ d1fuja\_ d2zchp\_ d3w94a\_ d1si5h\_  
d1l06a\_ g2pka.1\_ d1cgha\_ d1kigh\_ d1a5ia\_ d3s9ba\_ d1hj8a\_ d1ao5a\_  
d2anya\_ d1q3xa1\_ d1gvza\_ d1azza\_ d4gsoa\_ d2f91a1\_ d1iaua\_ d1gdna\_  
d1eufa\_ g1fiw.1\_ d1eq9a\_ d4nfea\_ d2rdla\_ d1spja\_ d1elva1\_ d1a7sa\_  
d1ekbb\_ d1pfxc\_ d1yc0a\_ d2aiqa\_ g1fiz.1\_ d1fi8a\_ d4k60a\_ d4dgja\_  
d1mzaa\_ d1op0a\_ d3tjva\_ d1pytd\_ d1sgfg\_ g1gg6.1\_ d2eeka\_ g1rtf.1  
d1a0ja\_ d3g01a\_ d1pytc\_ d4e7na\_ d1ddja\_ d1z8ga1\_ d2hlca\_ d1npma\_  
d1brup\_ g1jou.1\_ d1sgfa\_ d1autc\_ g2hnt.1\_ g1kdq.1\_ d1orfa\_ d3s69a\_

d4crga\_ d1fxya\_ d1bqya\_ d2ftba\_ d1pmpa\_ d2rcqa1 d1fdqa\_ d4lkpa\_  
d1sa8a\_ d1vyfa\_ d1lpja\_ d3vg7a1 d4azqa1 d1o8va\_ d5bvqa\_ d1p6pa\_  
d2qo4a\_ d1opba\_ d1yiva1 d1o1va\_ d4bvma1 d4tkba\_ d4i3ba\_ d1bwya\_  
d1ftpa\_ d1ggla\_ d4gkca\_ d1cbia\_ d3p6da1 d1kqwa\_ d2a0aa1 d1dzka\_  
d4tlja\_ d2a2ua\_ d4wfva\_ d3t1da\_ d4iaxa\_ d3zq3a\_ d2nnda\_ d1i4ua\_  
d1kxoa\_ d1bbpa\_ d1kt7a\_ d1exsa\_ d3s26a1 d1lf7a\_ d1qfta\_ d4gh7a\_  
d1z24a1 d1qabe\_ d1xkia\_ d1ew3a\_ d3bx7a\_ d4iawa1 d1n0sa\_ d3kzaa\_  
d2k23a\_ d2l9ca1 d2joza1 d1gm6a\_ d3kffa\_ d3saoa1 d1e5pa\_ d1yupa1  
d1iiua\_ d3lgia\_ d3i77a\_ d2z9ia2 d4nsva\_ d1lcya2 d4jcna\_ d1agja\_  
d1os8a\_ d1hpga\_ d1p3ca\_ d1l1ja\_ d1qtfa\_ d1e69a\_ d1mv5a\_ d3g60a4  
g1ii8.1 d1ewqa2 d1ji0a\_ d1qhla\_ d1v43a3 d2wmfa1 d1vpla\_ d1g2912  
d4a82a2 g1f2t.1 d2d62a1 d3tuic1 d2bbsa1 d3g60a3 d2ixea\_ d1g6ha\_  
d1sgwa1 d2qi9c\_ d3rlfa1 d3b60a1 d3d31a2 d2pzea1 g1xew.1 d1jj7a\_  
d1oxxk2 d2onka1 d1wlwa\_ d1iwea\_ d1qf5a\_ d1vmaa2 d1nija1 d1np6a\_  
d2p67a1 d3ihla\_ d1l1sa2 d1s1ma2 d1iona\_ d2v40a\_ d1dj3a\_ d3hida\_  
d2vola1 d2g0ta1 d1vcoa2 d1j8mf2 d1g3qa\_ d1xjca\_ d1p9ba\_ d1qzxa3  
d1ihua2 d1ihua1 d2qm8a\_ d1dj2a\_ d4ioja\_ d1cp2a\_ d1yrba2 d1hyqa\_  
d3gqba2 d1skye3 d1xp8a1 d1tf7a2 d1tf7a1 d1ye8a1 d1skyb3 d2qe7d2  
d4blta\_ d4huta\_ d3l1daa2 d4hyya\_ d2i3ba1 d1crla\_ d3j9tb2 d3ntua2  
d1vdza1 d2z43a\_ d1e9ra\_ d1nlfa\_ d3ziaa2 d1n0wa\_ d1g6oa\_ d3ziad2  
d3j9ta2 d1pzna2 d3gqbb2 d1gl9b1 d1gkub2 d4ok5a1 d2bmfa1 d2bmfa2  
d1yksa1 d1yksa2 d1jr6a\_ d2qeqa1 d2j1qa1 d1a1va2 d1g8fa3 d1c4oa1  
d2p6ra3 d2p6ra4 d1oywa3 d1wrba1 d1w36b2 d1w36b1 d1c4oa2 d3bora\_  
d1t6na\_ d2eyqa5 d2eyqa3 d2eyqa2 d2zu6a2 d1veca\_ d1uaaa1 d1w36d1  
d2g9na1 d1z3ix2 d2rb4a\_ d1hv8a1 d1hv8a2 d1t5ia\_ d1w36c2 d2j0sa2  
d2j0sa1 d1fuka\_ d3hjha1 d1z5za1 d1qdea\_ d1z63a1 d1s2ma2 d1s2ma1  
d1wp9a1 d1wp9a2 d1gm5a3 d1gm5a4 d3dina4 d3dina3 d1q0ua\_ d1w36c1  
d1z3ix1 d1nkta3 d1nkta4 d1uaaa2 d1w36d2 g1qhh.1 d2fwra2 d2fwra1  
d2v8ta\_ d3q3ma\_ d1za0a1 d1mxra\_ d2inca\_ d1jk0a\_ d2incb\_ d1mhyb\_  
d3hf1b\_ d1mtyb\_ d1r2fa\_ d2uw1a\_ d1mhyd\_ d3n37a\_ d1afra\_ d1oquc\_  
d1syya\_ d1mtyd\_ d2o1za\_ d1uzra\_ d1smsa\_ d2fkza\_ d1zuja1 d1s3qa1  
d2fjca1 d1z6om1 d1veia\_ d4dyya\_ d1jiga\_ d3gvya\_ d2pyba\_ d4cy9a1  
d3bvfa1 d1r03a\_ d2cf7a\_ d1nf4a\_ d1zs3a1 d4iwka\_ d3ka8a\_ d3np0x\_  
d1n1qa\_ d1lb3a\_ d4e6ka\_ d1z6oa1 d2fzfa1 d4dyua\_ d3ge4a\_ d1jgca\_  
d4am4a\_ d2z6ma\_ d1ji5a\_ d1vlga\_ d1lkoa1 d1krqa\_ d3qz3a\_ d1o9ra\_  
d2ffxj\_ d1euma\_ d1yv1a1 d2v2pa\_ d1j30a\_ d4di0a\_ d1dpsa\_ d1oewa\_  
d2qzxa\_ d2asia\_ d1psoe\_ d1miqa\_ d1smra\_ d2h6ta\_ d1lizda\_ d3hd8a\_  
d1j71a\_ d1dpja\_ d4aa9a\_ d1t6ex\_ g1b5f.1 g1lya.1 g1htr.1 d1qdma2  
d1bxoa\_ d1wkra\_ d1tzsa\_ d1libqa\_ d2qzwa\_ d1bdqa\_ d3ggta\_ d3ixoa\_  
d1mrxa\_ d2haha\_ d1tw7a\_ d4njsa\_ d1sgua\_ d2p3da\_ d1nsoa\_ d3d3ta\_  
d2rkfa\_ d1c6ya\_ d2rspa\_ d3ogpa\_ d3ekwa\_ d2o4na\_ d2j9ja\_ d1baia\_  
d3ggua\_ d3lzua\_ d4npua\_ d4j55a\_ d2r8na\_ d2fxda\_ d2p3ca\_ d4dqa\_  
d3ttpa\_ d3t3ca\_ d2p3aa\_ d2hc0a\_ d2fdda\_ d3mwsa\_ d1h4ra3 d4yl8a1  
d2a16a3 d1l7ya\_ d1wgda1 d1wggal d4q5eb\_ d1wjna1 d1se9a\_ d3n3kb\_



d1wz0a1 d1we6a1 d2m0xa\_ d2gbka\_ d3rt3b1 d1wh3a1 d1sifa\_ d2ekec2  
d4ii2b1 d4hk2a1 d1c3ta\_ d1m94a\_ d1wgha1 d1ttna1 d1j8ca\_ d1wx8a1  
d3v6cb1 d2ma9b\_ d4i6lb1 d1bt0a\_ d2jvca1 d1iyfa\_ d2k1fa\_ d1wxva1  
d1wf9a1 d1t0ya\_ d2io0b2 d1x1ma1 d2gbma\_ d1zw7a1 d2m17a\_ d1we7a1  
d21wpa\_ d2gbja\_ d1wjua1 d1v6ea1 d1v86a1 d4eewa\_ d1wiaa1 d4icva\_  
d4gu2a\_ d1wx7a1 d1wy8a1 d4hjka1 d2faza1 d1v5oa1 d2h1ia1 d2r8ba1  
d3b5ea1 d3cn9a\_ d1epwa1 d4lu0a\_ d1of8a\_ d3unda1 d3e9aa1 d1vr6a2  
d2qkfa\_ d1d9ea\_ d1o60a\_ d2bcgg1 d2bcgg2 d1d5ta1 d1dszb\_ d1a6ya\_  
d3cbba\_ d1ynwa1 d1r4ia\_ d1hcqa\_ d2hana\_ d2hanb\_ d2enva1 d1kb4b\_  
d2n11b\_ d1lo1a\_ d1cita\_ d1um8a\_ d1ixza\_ d1qvra2 d1qvra3 d1qzma\_  
d1sxjc2 d1jr3d2 d2p65a\_ d1l8qa2 d1g8pa\_ d3hu3a3 d1sxjd2 d1njfa\_  
d1in4a2 d1sxja2 d1tuea1 d2ce7a2 d1w5sa2 d1sxjb2 d1d2na\_ d1ny5a2  
d1ofha\_ d2gnoa2 d2a5yb3 d1fnna2 d1u0ja1 d1lv7a\_ d1iqpa2 d2fnaa2  
d1ixsb2 d4gita\_ d1sxje2 d1g41a\_ d2e3fa\_ d1mm0a\_ d2e3ea\_ d2l1da\_  
d2ny8x\_ d2e3ga\_ d2ny9x\_ d2nz3a\_ d2lj7a\_ d1n4na\_ d2m8bb1 d2kyqa\_  
d3psma\_ d1jxca\_ d2g11a\_ d1ugla\_ d4uj0a\_ d2k4ua\_ d1hp2a\_ d2lu9a\_  
d1baha\_ d2meoa1 d1wm7a\_ d1hlya\_ d1n8ma\_ d1jlza\_ d1wpda\_ d1c55a\_  
d1pvza\_ d1wt7a\_ d1rjia\_ d1wz5a\_ d1m2sa\_ d1pjva\_ d1c49a\_ d1qkya\_  
d2ktca1 d1wmta\_ d1du9a\_ d1j5ja\_ d1rlga\_ d1t0za\_ d2i61a\_ d1t1ta\_  
d1sn4a\_ d1kv0a\_ d2l1kba\_ d1npia\_ d1wwna\_ d1pe4a\_ d2kbka\_ d2li7a\_  
d1djta\_ d2kbha\_ d1dq7a\_ d1sega\_ d1omya\_ d1zywa1 d1jzaa\_ d1n9wa1  
d1bbua1 d1e1oa1 d1c0aa1 d1b8aa1 d1l0wa1 d3a74a1 d1t61c1 d1iyjb4  
d1iyjb5 d1iyjb3 d1o7ia\_ d4ipca1 d1x3ea\_ d4apva\_ d1jb7a1 d1jb7a3  
d3kdfa\_ d1ue1b\_ d1wjja1 d3eiva\_ d1xjva2 d1xjva1 d2ccza2 d1se8a\_  
d1l1loc\_ d1jb7b\_ d1qvca\_ d3ulla\_ d1qzga\_ d1miua4 d1miua5 d1miua3  
d1y14b1 d2nn6i1 d1i94l\_ d2zjra2 d1smxa\_ d2qamc2 d1hh2p1 d2r7da1  
d1rl2a2 d1wfga1 d3bzka4 d1x6oa2 d3a0ja\_ d2j01d2 d2ja9a1 d4q15a\_  
d1hr0w\_ d1luza\_ d2n3sa\_ d2vnud1 d1h95a\_ d1go3e1 d2nn6h1 d1ne3a\_  
d2mola\_ d1liz6a2 d1jjga\_ d1e3pa2 d2ix0a3 d2ix0a2 d2lxja\_ d1ueba3  
d1ueba2 d2z0sa1 d1u0la1 d2ix0a1 d2eifa2 d2je6i1 d3i2za1 d2c35b1  
d2ahob2 d1t9ha1 d3i4oa\_ d2qall1 d1jt8a\_ d2nn6g1 d3cama\_ d1i94q\_  
d1c9oa\_ d1d7qa\_ d2ba0a1 d2vnud2 d2vnud3 d1khia2 d2qalq1 d1wi5a1  
d1xtda2 d1ny4a\_ d1prt2 d2a1ka\_ d1je5a\_ d1rpma\_ d2shpa1 d1yfoa\_  
d1l8ka\_ d2ooqa1 d1g4us2 d1p15a\_ d1lara2 d1lara1 d1wcha\_ d2fh7a2  
d2fh7a1 d1ohea1 d1ohea2 d2f4da\_ d1rxda\_ d2hxpa\_ d1xria\_ d1fpza\_  
d3ezza\_ d4y2ea\_ d1i9sa\_ d1c11a\_ d4lbqa\_ d1a78a\_ d1slta\_ d4no4a\_  
d3zsja\_ d3duia\_ d1g86a\_ d1qmja\_ d1hlca\_ d1tdha3 d1q3ba3 d1ee8a3  
d1k82a3 g1qmo.1 g1len.1 d3zyra\_ d1fnya\_ d1n47a\_ g2ltn.1 d1avba\_  
d3usua\_ d1dhkb\_ d1f9ka\_ d1lukga\_ d1g8wa\_ d1g9fa\_ d1wbfa\_ d3wcsa\_  
d1g7ya\_ g1loe.1 d1mvqa\_ d1hq1a\_ d1dbna\_ d1qnwa\_ d1fx5a\_ d4l8qa\_  
d1ioaa\_ d3n35a\_ d3ubra\_ d1qo8a1 d1d4ca1 d2k3va\_ d1ft5a\_ d1qdba\_  
d1m1qa\_ d2j7aa\_ d1h21a\_ d1ogyb\_ d4fasa\_ d1oaha\_ d1sp3a\_ d3h33a\_  
d1rwja\_ d1os6a\_ d3bxua\_ d3h4na\_ d1i77a\_ d3caoa\_ d1j0pa\_ d2ctha\_  
d1duwa\_ d1ofwa\_ d2e84a\_ d1hh5a\_ d1gyoa\_ d3h34a\_ d1wioa4 d1ccza2

d1vcaa1 d1dr9a2 d1ic1a1 d2d9qb1 d2nxyb2 d2dara2 d2dara1 d1wyha2  
d2dloa2 d1rutx4 d1rutx3 d2cuqa2 d1x4la2 d1x4la1 d1x3ha2 d1x3ha1  
d2d8za1 d1x61a2 d1x6aa1 d1x6aa2 d2cora2 d2cora1 d1v6ga1 d1v6ga2  
d2d8za2 d1x64a1 d1x64a2 d1b8ta1 d2co8a1 d1x63a2 d2dj7a2 d2dj7a1  
d2cu8a2 d2cu8a1 d1g47a2 d1g47a1 d1j2oa1 d1wyha1 d2dloa1 d1wiga1  
d1wiga2 d2cupa2 d2cupa3 d1x68a1 d2d8ya2 d2d8ya1 d1m3va2 d1x62a1  
d1x68a2 d1x61a1 d1b8ta3 d1b8ta2 d2d8xa2 d2d8xa1 d1x4ka1 d1x4ka2  
d2cuqa1 d1m3va1 d2co8a2 d1j2oa2 d1x63a1 d2cura1 d2cura2 d1x62a2  
d1op9a\_ d1y01a1 d1letzb1 d1legj11 d2gsib1 d1nj9a1 d4jfhdl d1aqkl1  
d1t2ja\_ d1llo4h1 d1zvya1 d3v4vl1 d4enec1 d1kxtb\_ d5e8ea1 d2pxya\_  
d4weud\_ d1xiwc\_ d2esvd1 d1qznh\_ d1logae1 d1f4xh1 d4n1hb\_ d3ezjb1  
d3mlwl1 d1kfah1 d1letza1 d1b4jh1 d3cfic\_ d4w68a\_ d2arja1 d1ek3a\_  
d2ok011 d1vera\_ d1uwgh1 d1blnb1 d1fpth1 d1rzga1 d2giya1 d4m3kb1  
d1nc2a1 d2nyyd1 d1ncna\_ d1fbih1 d5dxwa\_ d4fqqa1 d1dqdh1 d1jfq11  
d1kelh1 d1faih1 d1frgl1 d1figl1 d4m6n11 d1fo0a\_ d4hxb11 d3b5ga\_  
d3quyd1 d2h9gb1 d1i8kb\_ d2dd8h1 d2ck0h1 d1eaja\_ d4w6wb1 d2a6ib3  
d1t66d1 d2e27h\_ d1ob1b1 d1f11b1 d2v7na1 d1ad0a1 d2xt1b1 d1pskh1  
d4i13b1 d2op4l1 d1a0ql1 d1uwell1 d1za3a1 d1ncb11 d4uu9a\_ d1bm3h1  
d1cloh1 d1nqba2 d1cf8h1 d4y5va\_ d1mhph1 d5anma1 d4cdgc1 d4ldeb\_  
d1y01b1 d2pcpb1 d1z3gl1 d1dfb11 d1fh5h1 d3g5xa1 d1tzib1 d4dn3l1  
d3zhka1 d2b1hh1 d2uyl1 d1f3dh1 d1nj9b1 d2agjh1 d2h1pl1 d1q72h1  
d8fabb1 d1ndmb1 d1rjca1 d4u6hb1 d3upca\_ d2fbj11 d1osph1 d1tvda\_  
d2cjev\_ d4fhd1 d1bd2d1 d1rz7h1 d3nn8a\_ d1blna1 d1knoa1 d1nfd1  
d2bmkb1 d1dq11\_ d1igyb1 d1igf11 d12e8h1 d3utza1 d1nc2b1 d1rihh1  
d4mwfb1 d4jvpa1 d1mieh1 d1rhfa1 d1fgn11 d1sbsh1 d1lp9e1 d1dn0a1  
d4lqf11 d1iaih1 d1kgcd1 d1mh5b1 d1gpol1 d2g60h3 d1f8t11 d2jixd1  
d4grwh\_ d1fo0b\_ d1bfob1 d1axsa1 d1u9ka\_ d1nmbh\_ d1h8na1 d1h8na2  
d1jguh1 d4eura1 d3sdy11 d35c8h1 d1w7211 d1mvub\_ d1i9rh1 d1ob1a1  
d4wenb\_ d1yeeh1 d3ietc1 d1f58h1 d1ad0b1 d1mqkl\_ d1nbvh1 d4b50a\_  
d3r8bb\_ d1baf11 d1mamh1 d4rgne1 d2gsgb\_ d35c811 d1bafh1 d1ai1h1  
d2pcpa1 d2fath1 d2x1pa\_ d1orsb1 d1libg11 d1shma\_ d1a2yb\_ d1u0qa\_  
d2coqa\_ d1hilb1 d1qfwi\_ d1jv5b\_ d1fn4b1 d5e0qa\_ d1nsnh1 d1plgl1  
d4ocx11 d1kb5h1 d1rzfh1 d1pg7x1 d2fx7h1 d2oi9c\_ d1l7i11 d3eyva1  
d1d5i11 d4ffyl\_ d1tet11 d1a6wh\_ d1lac6a\_ d3dvfa\_ d1nfd1 d1mimh1  
d1ri8a1 d1jhlh\_ d3dura\_ d1fskb1 d1f97a1 d3so3b1 d2ak4d1 d1lp9f1  
d4z7wf1 d1l7th1 d4y5ya\_ d4x7ec1 d1emth1 d1ikf11 d1nlbh1 d4uta11  
d1bjma1 d1eapb1 d1u6ah1 d2dtgd1 d1kj2b\_ d1xeda1 d1cleh1 d1fgvh\_  
d2bnub1 d2fb4h1 d2dtgb1 d1ktrh\_ d1jpth1 d1qkz11 d4hepg\_ d2atpb1  
d1flrh1 d2hrpl1 d1mvfa\_ d1iaim1 d3k80a1 d2jb5h1 d3zkxc\_ d4grwe\_  
d1it9h1 d1rhhb1 d3w9ec\_ d1e4wh1 d1sy6h1 d2j6eh1 d3qxta\_ d1jglh1  
d1p7ka1 d1tzhb1 d4n8pa1 d1gaf11 d2jelh1 d1wioa2 d4i0cc1 d1cicb1  
d1lmka2 d1lmka1 d1iqwh1 d1orqb1 d1ejoh1 d1jnlh1 d4zg1a\_ d43c9b\_  
d1ggbl1 d1wejh1 d3q6fa1 d1f3dj1 d3c6la1 d1bqlh1 d3p9wb\_ d1a3rl1  
d1h0db1 d2uzil\_ d1eo811 d1qfwl\_ d1n7ml1 d1igja1 d1c5ch1 d2a9mh\_

d1rmfh1 d1fj1b1 d4heme\_ d1ccza1 d1a5fh1 d1ogad1 d1dlfh\_ d1qa9b\_  
d1vge11 d3qskb\_ d1sjxa\_ d4ozfg1 d1sq2n\_ d1qd0a\_ d1kcvh1 d1c5db1  
d3qcull d8faba1 d3bn9d1 d1mjuh1 d4y8dc\_ d7fabh1 d3dvgb1 d1l0011  
d1a6tb1 d1gigh1 d1kcrh1 d2hwz11 d1yjdc1 d3clfl1 d4krna\_ d1d171\_  
d1e6oll d1mexh1 d3r0ma\_ d4kkna\_ d1fns11 d1oaqh\_ d1rzia1 d1lucb1  
d1ncw11 d4b41a\_ d1nfd1 d2mpah1 d2d7t11 d4grwf\_ d4b5ea\_ d1lk3h1  
d3u79a\_ d4u3xa\_ d1ghf11 d1bvkb\_ d1mcww1 d1b88a\_ d1jrhh1 d32c2b1  
d4wemb\_ d1dsfh\_ d1op3h1 d1ce111 d1iqda1 d1qoka1 d1qoka2 d1qfuh1  
d2crya1 d1ay1h1 d1oaql\_ d3ab0b\_ d1rur11 d1t4kb1 d1bz7b1 d1n0xh1  
d1for11 d1lucb11 d4w6yb\_ d43c9a\_ d2aab11 d1tzia1 d4n1ca\_ d1k6qh1  
d3g9ab\_ d4tvsa1 d1ligmh\_ d1pz5b1 d3dx9a1 d3wxwh\_ d1nakh1 d1kcull  
d3eaka\_ d4qlra1 d1cr911 d1d9ka\_ d1f4x11 d1deea1 d2i27n2 d1c12a1  
d2orb11 d1j8hd1 d1mcph1 d1c5da1 d1kenh1 d1bd2e1 d1h5ba\_ d4x7fc1  
d3upaa\_ d1t3fa1 d1indh1 d2dtgc1 d4hc111 d1zv5a1 d4wgvb\_ d1uwg11  
d4f37k1 d1aqkh1 d1vesa\_ d3zkqd\_ d1fpt11 d1l0411 d1knob1 d3rrqa\_  
d1ct8b1 d4orz\_ d1mlbb1 d4hgkc1 d1dqd11 d1bogb1 d4ozhe1 d1dr9a1  
d1i7za1 d1dn0b1 d1kell1 d1rzib1 d1ypzf1 d1wtla\_ d1hkfa\_ d1fail1  
d1figh1 d2vyre\_ d1sjva\_ d1ohqa\_ d1bfoa1 d1pkqb1 d1mjul1 d1b4j11  
d1nsn11 d2arjb1 d1p4bh\_ d4aj0a\_ d3nn8b\_ d2rcja1 d1f2xk\_ d4v1dd\_  
d1adqh1 d2eksa\_ d4k3ga\_ d1jfqh1 d1uweh1 d1frgh1 d4gftb\_ d1uz8b1  
d4n1ea\_ d1bm311 d1cl011 d3mcka1 d2vq1a1 d1ae6h1 d4aq1b1 d1uj3b1  
d1nbqa1 d1fh511 d2ck011 d2ywza\_ d1q7211 d4nxbx\_ d1hila1 d4hz1b1  
d2j8811 d1zmya1 d1cd0a\_ d1a4ka1 d1psk11 d1a0qh1 d4krmb\_ d1ncbh1  
d2fbjh1 d1j8he1 d1i3ua\_ d1cf811 d1fe8h1 d2p1ya1 d1eeqa\_ d2x89a\_  
d1o10a\_ d2r0lh1 d1ub5a1 d1dfbh1 d3eyvb1 d4jdvb1 d4p2cg\_ d2gsia1  
d2agj11 d1u3ha1 d2h1ph1 d1rih11 d1fskc1 d1boga1 d2a7711 d1osp11  
d1qfoa\_ d3dwta\_ d2fx711 d1rz711 d3stba1 d1pkqa1 d1b6da1 d1dzba2  
d1dzba1 d1kj2a\_ d4l1ha\_ d1rzgb1 d1dq1h\_ d12e811 d1miel1 d1jmaa\_  
d1sbs11 d1fgnh1 d1f5811 d1mqkh\_ d1ndgb1 d3qegl1 d1iail1 d2aw2a1  
d1tqbc1 d3fo2a1 d4dkaa\_ d1f8th1 d2g6011 d2ywy\_ d1uj3a1 d1yc7a\_  
d3bd3a\_ d4w6xb1 d1nmb1\_ d1i8ka\_ d1rjlb1 d1ypze1 d1p7kb1 d1kxqe\_  
d1gpoh1 d2z4qa1 d1w72h1 d1i9r11 d4qgya1 d4xt1c\_ d2qqnh1 d1cica1  
d3c08h1 d2cd0a\_ d2bdnh1 d1hnga1 d1mam11 d1nldh1 d1cr9h1 d4lcih1  
d3bkyh1 d3qg711 d1ai111 d1kxvc\_ d4iosd\_ d1l7ih1 d2x1qa\_ d1ub6b1  
d3k74b\_ d1libgh1 d1teth1 d1igya1 d1hxma1 d2x6ma\_ d2e71a\_ d5e03a\_  
d1qfwm\_ d2r0kh1 d1igjb1 d1rurh1 d1plgh1 d1mj8h1 d1yuhb1 d3fmg11  
d1rzf11 d1emt11 d1ad9b1 d1igtb1 d1nlb11 d1d5ih1 d3k7ua\_ d4ffyh\_  
d1bwwa\_ d3dvga1 d1a6ta1 d1fgvl\_ d4qxgl1 d1mim11 d1jh11\_ d2hffb1  
d2hh011 d1qkzh1 d1l7t11 d1afvh1 d1iaii1 d2cjuh\_ d1um5h1 d2ghwb2  
d2ghwb1 d1kgce1 d2fgwh1 d1ikfh1 d1dvfd\_ d2i24n1 d2xtjb\_ d1za3b1  
d2yc1a\_ d2hh0h1 d2x1oa\_ d1bvka\_ d1rjla1 d5e7ba1 d1igta1 d1il1b1  
d2fb411 d1mvua\_ d32c2a1 d1fvca\_ d1iqdb1 d2hrph1 d2p4ab\_ d4qo1a\_  
d1p2cb1 d1wt5c\_ d1t4ka1 d5c1mb\_ d1it911 d1bz7a1 d1b2wh1 d1e4w11  
d1jnl11 d1yedb1 d1za6b1 d3u7aa\_ d1igfh1 d3gnml1 d1orsa1 d1wejl1

d1a2ya\_ d1hxmb1 d1gafh1 d2j4wh1 d1pz5a1 d1j05a\_ d1a3rh1 d4fq1l1  
d1qfwh\_ d1eo8h1 d1n7mh1 d4s11a\_ d1kegh1 d5da4a\_ d1iqw11 d3whxb1  
d1vgeh1 d1deeb1 d1c12b1 d1t2q11 d1ad9a1 d3gsnb1 d3b2uc1 d1ggbh1  
d1t3fb1 d1nak11 d4ocmc\_ d1l1la1 d2v7hb3 d2esve1 d1mcoh1 d2qr0b1  
d2q3aa\_ d1ct8a1 d1kcr11 d2pxyb\_ d2uzih\_ d5c3ld\_ d3durb\_ d1c5c11  
d2ak4e1 d1d17h\_ d1xiwd\_ d1mlba1 d1rmf11 d1i7zb1 d1dlf1\_ d2xa3a\_  
d5bq7b1 d1dqqb1 d3h4211 d1egjh1 d1kcv11 d1fe811 d2j6e11 d1f3rb2  
d11k311 d1sm3h1 d1q0xh1 d1ghfh1 d7fab11 d1igch1 d11o0h1 d4idla\_  
d5c2b1\_ d1jrh11 d1l11a1 d3zhda1 d4kfzc\_ d1b0wa\_ d1e6oh1 d1mex11  
d4krpb\_ d1fnsh1 d1ncwh1 d4hgma\_ d4eigb1 d4rzca\_ d2mpa11 d4y5xa\_  
d5en2b1 d3lrga1 d4ej1c1 d1rhha1 d1j05b\_ d1forh1 d1q9wb1 d2wzpd\_  
d2aq2a1 d1h0da1 d3revb1 d2ij0c1 d1tzh1 d4m7j11 d1k6q11 d3b9kc1  
d1igml\_ d3qeua1 d1dsfl\_ d1ce1h1 d1kcuh1 d1zvha1 d1zvoa1 d1tqbb1  
d1ay111 d2qscl1 d2cgrh1 d1n10h1 d1ken11 d3eo0a1 d4n9ob1 d1n0x11  
d3k1kc\_ d1c4qa\_ d1prtc1 d2wv6d\_ d1prtf\_ d1ltrd\_ d4l63b1 d1r4pb\_  
d1prtd\_ d1tl0f\_ d2bosa\_ d3chbd\_ d2aq2b1 d1ck1a1 d1lenfa1 d1i4pa1  
d1v1oa1 d1et9a1 d1esfa1 d2g9hd1 d4ohja1 d1klud1 d1bxta1 d1eu3a1  
d1ty0a1 d1fnua1 d2cqva1 d1fhga\_ d2k1ma\_ d2dl2a1 d1biha3 d1biha1  
d1biha4 d3qp3a1 d1g1ca\_ d1gxea\_ d1cvsc2 d1cvsc1 d1xmwa2 d1m4ka2  
d2otpa2 d1biha2 d1rhfa2 d2fcba2 d2fcba1 d1wwbx\_ d1gsma2 d1epfa1  
d1epfa2 d2dava1 d1waaa\_ d1f97a2 d1x44a1 d1vcaa2 d1fnla2 d1fnla1  
d3b5ha2 d3h8na2 d3h8na1 d1bjba1 d1bjba2 d1pd6a\_ d1f2qa2 d1f2qa1  
d3cx2a\_ d1nbqa2 d3b5ha1 d1n26a1 d1xiwb\_ d1xaau\_ d1fltx\_ d2ifga1  
d1olla1 d1olla2 d1cs6a4 d1cs6a3 d1cs6a2 d1cs6a1 d2gw5a2 d1sy6a1  
d1xiwa\_ d1lucta2 d1lucta1 d1ry7b2 d1gl4b\_ d1qz1a3 d1olza1 d2c9aa1  
d1wwca\_

**Family-81 (d.108.1.1)**

**Positive dataset contains 46 protein sequences.**

d2beia1 d4m3sa\_ d1u6ma1 d1yk3a1 d3dr6a\_ d1xmta\_ d1z4ea1 d2ge3a1  
d2fiaa1 d2jdca1 d1y9wa1 d3to7a\_ d1wwza1 d2fl4a1 d2ozua1 d2b5ga\_  
d2cy2a1 d2p0wa\_ d4pswa\_ d1yrea1 d1yr0a1 d1m4ia\_ d2gana1 d1yvka1  
d2g3aa1 d1y7ra1 d2euia1 d2fsra1 d1xeba\_ d2ae6a1 d1qsm1a\_ d2aj6a1  
d1y9ka1 d1vkca\_ d2atra1 d2d4pa1 d2fiwa1 d2fe7a1 d1tiqa1 d2ou2a\_  
d1yx0a1 d2fcka1 d2j8ma\_ d2pq8a\_ d1z4ra1 d1s3za1

**Negative dataset contains 3989 protein sequences.**

d1m32a\_ d1libja\_ d1c7na\_ d1iuga\_ d4q75a\_ d2bkwa1 d1t3ia\_ d1qz9a\_  
d1jf9a\_ d1eg5a\_ d1p3wa\_ d3kgwa\_ d1c11a\_ d2ctza1 d1vjoa\_ d2rfva\_  
d1gc0a\_ d1cs1a\_ d1d2fa\_ d2ch1a1 d1qgna\_ d1pffa\_ d1elua\_ d2xlba\_  
d3m83a1 d4nmwa\_ d1xkla\_ d2wfla\_ d3i2ka1 d1lnsa3 d1mpxa2 d2cfba1  
d1dfoa\_ d1o69a\_ d1bj4a\_ d3k28a\_ d2bwpa\_ d3lg0a\_ d2fnua\_ d3ou5a\_  
d1z7da1 d1b9ha\_ d4msoa\_ d1bs0a\_ d1s0aa\_ d1sffa\_ d3tqxa\_ d1mdoa\_  
d3qboa\_ d3pgya\_ d1bjna\_ d2dkja\_ d1ejia\_ d1vefa1 d4wxga\_ d3bs8a\_  
d3gbxa1 d1w23a\_ d1u08a\_ d1lc5a\_ d1b5pa\_ d2ay1a\_ d1bw0a\_ d3pd6a\_  
d7aata\_ d2csta\_ d1j32a\_ d4wlha\_ d1o4sa\_ d1v2da\_ d1gdea\_ d1m6sa\_

d1v72a1 d1svva\_ d1ajsa\_ d1wsta1 d2f8ja2 d1lk9a\_ d1vp4a1 d1xi9a1  
d2gb3a1 d1yaaa\_ d1ddla\_ d1auyb\_ d2wo3b\_ d1shxa\_ d1f56a\_ d1bypa\_  
d1azca\_ d1ws8a\_ d3u25a\_ d1cuoa\_ d1id2a\_ d1rkra\_ d2iaac\_ d4dp1x\_  
d1nwp\_ d2gima\_ d2i7sa\_ d1qhqa\_ d3ehbb1 d1fftb1 d1gyca3 d1hfua2  
d1kbva1 d1kbva2 d1sdda1 d1sdda2 d1gyca1 d1gyca2 d1mzya1 d2bw4a1  
d1aoza1 d1aoza3 d1aoza2 d1kyaa2 d1kyaa3 d1kyaa1 d1mzya2 d4e9sa1  
d1sddb1 d1sddb2 d1hfua1 d1hfua3 d1oela2 d1oela1 d1v10a2 d1v10a3  
d1v10a1 g1f8v.1 d2bbvc\_ d3sxwa1 d4luka\_ d1iknc\_ d3brda1 d1p7hl1  
d1oy3c\_ d1imhc1 d1gjia1 d1zk9a1 d2cxka1 d2bema\_ d1pama1 d1lea9c1  
d1qhoa1 d2fhfa2 d2fhfa1 d1k3ia1 d1j0ha1 d1csla1 d2bhua1 d1ledqa1  
d1f1sa2 d1ut9a2 d1gvia1 d1txka1 d2phla1 d1fxza2 d1fxza1 d1lrha\_  
d1uija1 g1dgw.1 d2v09a\_ d1uika2 d1uika1 d1dgwa\_ d1nepa\_ d1ktja\_  
d1ds6b\_ d1fstb\_ d1ex0a1 d1g0da1 d2b5ea2 d2b5ea3 d2b5ea1 d2b5ea4  
d2kp1a1 d2kp2a1 d1hyua3 d1hyua4 d1j08a1 d2bjca1 d2hsga1 d1qpza1  
d1efaa1 d1ydwa2 d2nvwa2 d1zh8a2 d1qkia2 d1xeea2 d1t1ta2 d3gpdg2  
d2q49a2 d1hdgo2 d2g17a2 d2cvoa2 d2czca1 d3pwka2 d1lobfo2 d1i32a2  
d1zyao2 d2pkqo2 d1b7go2 d2hjsa2 d1cf2o2 d1vkna2 d1nvm2 d4lt9a1  
d3tc7a1 d3hoja\_ d1i4na\_ d3vnda\_ d3n18a1 d1geqa\_ d3nav1 d1v5xa\_  
d4a2ra1 d3tc6a1 d1ujpa\_ d4ijba\_ d1xcfa\_ d1vc4a\_ d1rd5a\_ d1qopa\_  
d3b5va\_ d2msya\_ d2djoa1 d2r5za\_ d1au7a1 d1f43a\_ d21mda1 d1akhb\_  
d1s7ea1 d3nara\_ d1zq3p1 d2craa1 d1mija\_ d4uuta\_ d3a01a\_ d1x58a1  
d3rkqa1 d3cmya1 d2cqxa1 d2da6a1 d1e3oc1 d1fjla\_ d1mh3a1 d1ig7a\_  
d1x41a1 d1wh7a1 d1gt0c1 d2mw8a\_ d1lfup\_ d1x2ma1 d1b72a\_ d1wi3a1  
d1jgga\_ d1wjha1 d1x2na1 d1mnmc\_ d2cuea1 d3k2aa\_ d2hosa\_ d2jwta2  
d1pufa\_ d1oetc1 d2hi3a\_ d1b8ia\_ d4j19a\_ d3lnqa\_ d1wh5a1 d1b8ib\_  
d1fexa\_ d2cqra1 d1guua\_ d1ug2a1 d2cqqa1 d2ajea1 d4a69c\_ d1h8ac1  
d2crga1 d2iw5b1 d1xc5a1 d1ofcx1 d2cu7a1 d1wgxa1 d2cjja1 d2ckxa1  
d1gvda\_ d1hcra\_ d1tc3c\_ d1gdta1 d1u78a2 d1hlva1 d1iufa2 d1iufa1  
d2iu5a1 d1zk8a1 d2g7sa1 d2fd5a1 d2np5a1 d1z0xa1 d2id6a1 d2d6ya1  
d2i10a1 d1vi0a1 d2oi8a1 d3c07a1 d2ns7a1 d2fq4a1 d2yvea1 d1t33a1  
d2o7ta1 d2np3b1 d2g7ga1 d2gena1 d2fbqa1 d2g71a1 d2gfna1 d2g3ba1  
d2jj7a1 d2hyja1 d1sgma1 d1ui5a1 d2hkua1 d2id3a1 d4jyka1 d3lv8a\_  
d1s3ga1 d1zaka1 d1s4qa\_ d3tvta2 d1uf9a\_ d1khta\_ d1ckea\_ d1losna\_  
d1p5zb\_ d4tmka\_ d3cm0a\_ d1tmka\_ d1jaga\_ d3h86a\_ d1t0hb\_ d1nn5a\_  
d2h92a\_ d3kb2a1 d2c95a1 d1yj5a2 d1kgda\_ d1ly1a\_ d2ak3a1 d1vyva2  
d1deka\_ d2grja1 d1p3ja1 d1y63a\_ d1e4ya1 d1s96a\_ d3iija1 d1lvga\_  
d1nksa\_ d1vyua2 d4e22a\_ d1qf9a\_ d1jjva\_ d1q3ta\_ d1ki9a\_ d1lw7a2  
d1teva\_ d1kjwa2 d1gsia\_ d2iyva2 d1viaa\_ d1e6ca\_ d1g3ma\_ d1j99a\_  
d1t8ta1 d1nsta\_ d1fmja\_ d1zrha\_ d1ls6a\_ d2a3ra\_ d2zptx\_ d3ckla\_  
d1texas\_ d1q44a\_ d2gwha\_ d1uj2a\_ d4gi7a\_ d2jeoa1 d1rz3a\_ d1z0ja1  
d3umra2 d3gj0a1 d2gaoa1 d1yzga1 d1x3sa1 d1g7sa4 d1puja\_ d1udxa2  
d1kk1a3 d2o52a\_ d1jwyb\_ d1zcaa2 d1zcba2 d2fv8a1 d2cjwa\_ d3dz8a1  
d1xzpa2 d1vg8a\_ d4qxaa\_ d2ew1a1 d1x1ra1 d2bcgy\_ d3doea1 d3cona\_  
d3rega\_ d3wyga\_ d1upta\_ d2b6ha1 d1zd9a1 d1lnza2 d1r5ba3 d1n0ua2

d1r2qa\_ d2f9la1 d2rhda\_ d3q3jb\_ d3q85a\_ d1efma1 d1r8qa\_ d2gf9a1  
d2akab1 d1ek0a\_ d1z08a1 d2gcoal d2dyla2 d4g01b\_ d2cxxa1 d1svia\_  
d3q72a\_ d1ni3a1 d4ac9a4 d2erxa1 d2bmea\_ d1wxqa1 d2gf0a1 d4ldja1  
d1zunb3 d1d5ca\_ d4lv5b\_ d1efca3 d1kmqa\_ d2g6ba1 d3lrpa\_ d1tada2  
d2y8ea\_ d4rd4a1 d1z06a1 d2heia\_ d3a58b\_ d1u0la2 d1d2ea3 d1zj6a1  
d2ocba\_ d3rwoa\_ d1mr3f\_ d2e9sa1 d4u5xa1 d2iwra\_ d2fn4a1 d3bwdd\_  
d2nzja1 d2atva1 d2ksqa\_ d3l43a\_ d1mkya2 d1mkya1 d1wmsa\_ d1jnja3  
d2rmka\_ d1f6ba\_ d1f60a3 d1gota2 d1jala1 d2fh5b1 d1g16a\_ d2wblc\_  
d1m7ba\_ d1wf3a1 d1f5na2 d1t9ha2 d1z6xa1 d1z0aa1 d2fg5a1 d2a5ja1  
d2bcjq2 d1s0ua3 d1ky3a\_ d4y0va\_ d4lhwa\_ d2qmea1 d2atxa1 d1legaa1  
d1ryha\_ d1moza\_ d1nrjb\_ d2erya1 d3bfka\_ d1puia\_ d1fzqa\_ d3j3az1  
d3t5ga\_ d1shza2 d3defa\_ d2f7sa1 d3raba\_ d3tsoa\_ d3aq4a\_ d2a17a1  
d3sfva1 d3bc1a\_ d2ncda\_ d1sdma\_ d3h4sa1 d2heha\_ d2grya\_ g3kin.1  
d1kk8a2 d1br2a2 d1goja\_ d1f9va\_ d2mysa2 d3t0qa\_ d4db1a1 d3gbja\_  
d1ry6a\_ d1v8ka\_ d1vava\_ d1uaia\_ d1k8ka2 d1k8ka1 d3uleb1 d3i33a2  
d3i33a1 d1bupa1 d1dkgd2 d1dkgd1 d4ci6a2 d1jcfa1 d4a2ba2 d2fxua1  
d1yaga1 d4cbua2 d1bupa2 d1g99a1 d2e1za2 d2e1za1 d1saza1 d1saza2  
d1liqca1 d1eb7a2 d1eb7a1 d1nmla2 d1nmla1 d1zc6a1 d1zbsa1 d1zbsa2  
d1zc6a2 d2ch5a2 d2ch5a1 d1zxo2 d1zxo1 d1hroa\_ d4gedb\_ d3zooa\_  
d1mz4a\_ d1gu2a\_ d1f1fa\_ d1dvva\_ d1c6ra\_ d1c75a\_ d1e29a\_ d1gdva\_  
d1cnoa\_ d1h32b\_ d1co6a\_ d2bh4x\_ d2aiua\_ d5cytr\_ d1jdl\_ d1i8oa\_  
d2zboa\_ d3dmia\_ d1ls9a\_ d1wvec\_ d2yk3a\_ d3ph2b\_ d1dw0a\_ d5aura\_  
d1ql3a\_ d1qn2a\_ d1f1ca\_ d4zzva\_ d2xspa\_ d1eg1a\_ d4v20a\_ d1ojja\_  
d4ipma1 d4csia\_ d3pfza\_ d3ovwa\_ d2yoka\_ d2nqya\_ d1h4ga\_ d1hixa\_  
d1oa2a\_ d1olra\_ d3b7ma\_ d4h7ma1 d3wp3a\_ d2vgda\_ d1ligoa\_ d3zsea\_  
d2nlra\_ d3wx5a\_ d1oa3a\_ d1pvxa\_ d1m4wa\_ d1f5ja\_ d1oa4a\_ d4ix1a1  
d2ah2a1 d1n1ta1 d1evsa\_ d1cnt1\_ d1pvhb\_ d1z7ca\_ d1huwa\_ d1bgea\_  
d1rhga\_ d1f6fa\_ d1f45b\_ d1i1rb\_ d1axia\_ d1etea\_ d3tgxb\_ d1scfa\_  
d2z3qa1 d3qb1a\_ d1hula\_ d1m48a\_ d4nkqb\_ d1eera\_ d5e4ea\_ d2o27a\_  
d3b5ka\_ d2psma1 d4zf7a\_ d3uf5a\_ d4x51a\_ d1d9ca\_ d4ypgc1 d3oq3a\_  
d1lqsl\_ d1n1fa\_ d1aula\_ d1wu3i\_ d3bes1\_ d3ux9a\_ d2ejca\_ d3muea1  
d1ihoa\_ d3q12a1 d3rbaa\_ d2qtra\_ d1nupa\_ d3l92a\_ d1f9aa\_ d1qjca\_  
d2h29a\_ d1vlha\_ d1lw7a1 d1mrza2 d4ruka\_ d2e17a\_ d1iq0a2 d1r6ta2  
d1ivsa4 d2cyba\_ d1rqga2 d1j09a2 d2yxna\_ d1f7ua2 d1h3fa1 d1ffya3  
d2g36a1 d1nzja\_ d1jila\_ d1n3la\_ d1i6la\_ d1pfva2 d1h3na3 d3n9ia\_  
d3sz3a1 d3sw2a\_ d1moxc\_ d1dx5i3 d1edmb\_ d1aut12 d1aut11 d1nqlb\_  
d1dva11 d1szba2 d1kigl\_ d2y5fl\_ d1ijqa2 d1gk5a\_ d1g1sa2 d1nt0a3  
d1lmja2 d1lmja1 d1nzia2 d2wphe\_ d1klil\_ d1pfx12 d1pfx11 d1p9ja\_  
d1g1ta2 d1f7ea\_ d4yzub\_ d2mgpa1 d1b9wa1 d1b9wa2 d2mgpa2 d1ob1c1  
d1ob1c2 d1n1ia2 d1n1ia1 d2npra2 d2npra1 d2y5ia\_ d1qlsa\_ d1psra\_  
d3n22a\_ d2egda\_ d4ggfc\_ d2wcea\_ d2luca\_ d4aqia\_ d3nsia\_ d2lp3a\_  
d1j55a\_ d1a4pa\_ d1k8ua\_ d1nsha\_ d1pvaa\_ d3fs7a\_ d2pvba\_ d1ttxa\_  
d1rwy\_ d2kyfa\_ d1rk9a\_ d1exra\_ d1tiza1 d1nyaa\_ d1g8ia\_ d1ggwa\_  
d1wdcc\_ d3fwba\_ d1ggza\_ d2o5ga\_ d1ctaa\_ d1m45a\_ d3i5gc\_ d1sl8a\_

d1fpwa\_ d2scpa\_ d2roaa\_ d4aqra\_ d3pn7b\_ d1br1b\_ d2mysb\_ d1s6ca\_  
d1bjfa\_ d2obha\_ d1jfka\_ d1jfoa\_ d1qv0a\_ d1lkja\_ d2mlfc\_ d2m97a\_  
d2d8na\_ d4by5a\_ d1jbaa\_ d4nqga\_ d1wdcb\_ d2mysc\_ d1j7qa\_ d1s6ia\_  
d1uhka2 d1r2ua\_ d1dtla\_ d3kf9a\_ d3pn7c\_ d1fi6a\_ d1c07a\_ d5d67d\_  
d1tuza\_ d1h8ba\_ d1eg3a1 d2zkmx1 d1snla\_ d1y1xa\_ d1hqva\_ d1dvia\_  
d1df0a1 d1qxp2 d4usla\_ d1k94a\_ d1sfsa\_ d1jfxa\_ d1wkya2 d1uuqa\_  
d3wh9a\_ d4m1ra\_ d1xyza\_ d4xuya\_ d2je8a5 d4bf7a1 d3cuia\_ d1ur4a\_  
d1qw9a2 d1odza\_ d2vzsa5 d1bqca\_ d2x2ya1 d1hjqa\_ d1qnra\_ d4y7ea1  
d1vjza\_ d4k68a\_ d2v3ga\_ d4hpga\_ d1nofa2 d1nq6a\_ d1h4pa\_ d3ziza\_  
d4bs0a\_ d1ecea\_ d1h1na\_ d1ta3b\_ d1w91a2 d1ilwa\_ d1uhva2 d1us3a2  
d1egza\_ d7a3ha\_ d1tvna1 d3nyda1 d1ghsa\_ d2cyga1 d4xv0a\_ d2c8na2  
d1w32a\_ d3emca\_ d1v6ya1 d1foba\_ d2uwfa1 d2fgla\_ d3niya1 d2c0ha1  
d1rh9a1 d1yq2a5 d1szna2 d1fa2a\_ d1pama4 d5do8a1 d1ea9c3 d1hx0a2  
d2fhfa5 d1qhoa4 d1avaa2 d1m53a2 d4m8ua1 d2gjpa2 d1lwha2 d4howa1  
d1ktba2 d1j0ha3 d3vm5a1 d2x1ia\_ d1wzaa2 d1uasa2 d2diea1 d1mxga2  
d1ht6a2 d1eswa\_ d1iv8a2 d5cpsa\_ d1ud2a2 d1zjaa1 d3gbea1 d1kwga2  
d1wdpa\_ d1gcy2 d1g5aa2 d1hvxa2 d3dhpa2 d2bhua3 d4do4a1 d3qgva1  
d1e43a2 d1g94a2 d2d3na2 d1gjwa2 d1gvia3 d1x1na1 d1r7aa2 d1tz7a1  
g1apy.1 d3ljqa\_ g1k2x.1 d4c7ga2 d2gjxa1 d1jaka1 d1yhta1 d4toqa\_  
d1wb0a1 d1w9pa1 d1eoka\_ d1itxa1 d1kfwa1 d1goia2 d1ledqa2 d2gsja\_  
d1hjxa1 d1jnda1 d1vf8a1 d3wdpp1 d3wq5a\_ d1gnxa\_ d4gxp2 d4hz8a\_  
d1e4mm\_ d3aiua\_ d1wcga1 d1qvba\_ d3ahxa\_ d1v02a\_ d2dgaa\_ d1pbga\_  
d1vffa1 d4ha4a\_ d1mixa2 d1e5wa2 d1j19a2 d1isna2 d2a16b2 d1g4ma1  
d1g4ma2 d1iuka\_ d2csua1 d3q9ub\_ d2yv1a1 d3q9na\_ d2d59a\_ d1oi7a1  
d2yv2a1 d1euca1 d1y81a1 d3nvva1 d1krha3 d2h88b1 d1n62a2 d1t3qa2  
d1kf6b2 d1zoyb1 d1jq4a\_ d1ffva2 d1dgja2 d1rm6c2 d91dta1 d2ewda3  
d1up7a1 d2dfda1 d1s6ya1 d1vjta1 d7mdha1 d1hyea1 d1t2da1 d1ojsa3  
d1b8pa1 d1lldna1 d1hyha1 d1civa1 d2a92a1 d1ez4a1 d1i0za1 d1y6ja1  
d1gv0a1 d1ur5a1 d1lllda1 d1lobba1 d1npya1 d3t4ea2 d1a4ia1 d1o0sa1  
d2hk9a2 d2egga2 d1b26a1 d1bvua1 d1c1da1 d1leha1 d1gtma1 d1euza1  
d1nvtal d3dona2 d1ledza1 d1gpja2 d1vi2a1 d1p77a1 d1nyta1 d1b0aa1  
d1vl6a1 d1v91a1 d1txga2 d3f47a1 d1mv8a2 d2pv7a2 d1xc2a3 d2ahra2  
d4xiya1 d2f1ka2 d1pgja2 d1i36a2 d1np3a2 d1lj8a4 d1teaa3 d1qmg2  
d2i76a2 d2g5ca2 d1wdka3 d1dlja2 d3cuma3 d1kola2 d1f8fa2 d1qora2  
d1jqba2 d1vj0a2 d1cdoa2 d1gu7a2 d1d1ta2 d1xa0a2 d2dm6a2 d1jvba2  
d1rjwa2 d1lllua2 d1h2ba2 d1tt7a2 d1piwa2 d1o89a2 d1iz0a2 d1e3ja2  
d1yb5a2 d1uufa2 d1vj1a2 d1e3ia2 d3gpdg1 d1vc2a1 d2nvwal d1u8fo1  
d1ydwa1 d1hdgo1 d2g17a1 d1cf2o1 d2czca2 d1r0ka2 d1lobfo1 d2cvoa1  
d1ebfa1 d1h6da1 d1i32a1 d1zh8a1 d2q49a1 d1qkia1 d3pzra1 d1xeaa1  
d1vkoa1 d1vm6a3 d3qvsa1 d2pkqo1 d1b7go1 d1gr0a1 d1p1ja1 d1lc0a1  
d1j0xo1 d3pwka1 d2hjsa1 d1zyao1 d1vkna1 d1t1ta1 d1nvmb1 d3sjua\_  
d3ojfa1 d1xu9a1 d2jjya1 d1n7ha\_ d1y1pa1 d1h5qa\_ d1jtva\_ d4fs3a\_  
d2bkaa1 d1gy8a\_ d2c5aa1 d1ulsa\_ d1ooea\_ d2b69a1 d1y5ma1 d1spxa\_  
d1aela\_ d1bxka\_ d1ydea1 d1gega\_ d1hdoa\_ d1o5ia\_ d1e6ua\_ d1snya1

d2rhca\_ d3zv4a\_ d5ceja\_ d2d1ya1 d1fjha\_ d3w8ea\_ d2fmua1 d1x1ta\_  
d1rpna\_ d3ay7a1 d1k2wa\_ d1eq2a\_ d2hrba1 d3ruaa\_ d2ew8a1 d4hwka\_  
d1xgka\_ d2bd0a1 d1yo6a1 d2a35a1 d2ntva\_ d1vl8a\_ d1hdca\_ d4bkua\_  
d2ag5a1 d2q45a\_ d1nffa\_ d4iy1a\_ d1zbqa1 d1kewa\_ d1ek6a\_ d1ja9a\_  
d2q46a2 d1iy8a\_ d1cyda\_ d2ptga\_ d1hxha\_ d1uzma1 d3lyla\_ d4m89a\_  
d3wyea\_ d2b11a1 d1w6ua\_ d1sb8a\_ d2q2va\_ d4nr0a\_ d1e6wa\_ d2gasa\_  
d3oiga1 d2bgka1 d1mxha\_ d1vl0a1 d1rkxa\_ d1r6da\_ d1wmaa1 d1e7wa\_  
d2c07a1 d1xkqa\_ d3tzha\_ d1g0oa\_ d3lz6a\_ d1qyca\_ d1edoa\_ d1gz6a\_  
d1oc2a\_ d1t2aa\_ d1zema1 d2xoxa\_ d1z45a2 d1p33a\_ d3lt0a\_ d4e6pa\_  
d2wyua\_ d1db3a\_ d4q9na\_ d1xh1a\_ d4o1ma\_ d1fmca\_ d2uvda\_ d2gdza1  
d1uaya\_ d2z1ma\_ d2o23a2 d2fr1a2 d2fr1a1 d1qsga\_ d1qyda\_ d4zjua\_  
d2a4ka1 d1yb1a\_ d1wvga1 d1yxma1 d3f4ba\_ d1mg5a\_ d1xg5a1 d1r55a1  
d3gboa\_ d1atla\_ d1kufa\_ d1buda\_ d4q11a\_ d1quaa\_ d1yp1a\_ d1wnia\_  
d2gfoa1 d1vjva\_ d2ayna1 d3nhea\_ d3u1ra1 d1g9ka2 d1k7ia2 d3ioqa\_  
d1fh0a\_ d1o0ea\_ d1khqa\_ d1m6da\_ d2cb5a\_ d1cs8a\_ g8pch.1 d1s4va\_  
d2pnsa\_ d1vsna1 d1mira\_ d1liwda\_ d2oula\_ d7pcka\_ d3bwka\_ d3bcna\_  
d2p86a\_ d1pvja\_ d1gece\_ d1deua\_ d4bs6a\_ d1xkga1 d1cqda\_ d1jqpa2  
d2c0ya\_ d2bdza\_ d3p5ua\_ d2o36a\_ d1ex4a2 d1c6va\_ d2jk6a2 d2jk6a1  
d1feca1 d1feca2 d1lpfa1 d1lpfa2 d1xhca1 d1xhca2 d1dx1a2 d1dx1a1  
d1gera2 d1m6ia2 d1onfa1 d1onfa2 d3lada2 d3lada1 d1w4xa1 d1w4xa2  
d1gesa2 d1mo9a1 d1xdia1 d1fl2a2 d1fl2a1 d1fcda1 d1fcda2 d1h6va2  
d1h6va1 d1mo9a2 d1gv4a2 d1gv4a1 d2gv8a2 d2gv8a1 d1aoga1 d1aoga2  
d1hyua1 d1ebda1 d1ebda2 d3dk9a1 d1q1ra2 d1q1ra1 d1zbf1a1 d2z1ha\_  
d2etja1 d3qioa1 d1j11a\_ d2e41a\_ d1j12a\_ d2lsna1 d1io2a\_ d1uaxa\_  
d2yv0x\_ d1mu2a1 d1ekea\_ d1reoa1 d1ju2a1 d2f5va1 d3c96a1 d2gmha1  
d1pj5a2 d1gpea1 d1o5wa1 d1n4wa1 d1k0ia1 d2dw4a2 d2ivda1 d1seza1  
d2voua1 d1kdga1 d1s5ja1 d2hbja2 d2igia\_ d1wlja\_ d1qhta1 d4dlea1  
d1tgoa1 d2f96a1 d3tr8a1 d3mxma\_ d1q8ia1 d1y97a1 d1w0ha\_ d2py5a1  
d1noya\_ d1d5aa1 d1yt3a3 d2guia\_ d3mwp1a1 d4kb1a\_ d1b9ra\_ d1offa\_  
d1frra\_ d3wcqa\_ d1e9ma\_ d1l5pa\_ d1wria\_ d1i7ha\_ d3av8a\_ d1rfka\_  
d3p1ma1 d3b2ga\_ d2bt6a2 d1kb0a1 d1tq5a1 d1wgqa1 d1v89a1 d2coda1  
d1zc3b\_ d1wg7a1 d1u5ea1 d1v61a1 d2coca1 d2ys1a1 d1v5pa1 d1ntya2  
d1wjma1 d1wi1a1 d1u29a\_ d1xx0a1 d1unqa\_ d2zkmx3 d1fhoa\_ d1v88a1  
d2adza1 d1x1fa1 d1p6sa\_ d2coaa1 d1btka\_ d1v5ma1 d1faoa\_ d2x18a\_  
d1dyna\_ d1x1ga1 d4kaxb\_ d2j59m1 d1ki1b2 d1xcga2 d1txda2 d1u5da1  
d1dbha2 d1wl1ha\_ d1upqa\_ d1v5ua1 d1foea2 d2fj1a1 d1eaza\_ d2dfka2  
d2cofa1 d1kz7a2 d1r7ha\_ d1faaa\_ d1wika1 d1xfla\_ d1ttza1 d2f51a1  
d1ti3a\_ d1nhoa\_ d1sena\_ d2i4aa\_ d1ep7a\_ d1zmaa1 d1fo5a\_ d3lefa1  
d3diea1 d2yana1 d1z6na1 d1oaza\_ d3zywa1 d4aj8a\_ d1nm3a1 d4fiwa\_  
d1wmja\_ d4hs1a1 d1i1oa\_ d1xwaa1 d1wjka1 d2vm1a\_ d1fb6a\_ d1gh2a\_  
d1h75a\_ d1nw2a\_ d1kx5b\_ d3a6na\_ d4m6ba2 d2nqbd\_ d3wkjd\_ d2yfwe\_  
d4h9na\_ d5bnxa\_ d1kx5c\_ d3r45a\_ d1eqzb\_ d4jjnb\_ d1f66c\_ d1eqza\_  
d4wnnb\_ d1kx5a\_ d1u35c1 d1id3a\_ d2nqbc\_ d1kx5d\_ d1f1ea\_ d1b67a\_  
d1um8a\_ d1qvra2 d1qvra3 d1qzma\_ d1sxjc2 d1jr3d2 d2p65a\_ d1l8qa2



d1g8pa\_ d3hu3a3 d1sxjd2 d1njfa\_ d1in4a2 d1sxja2 d1tuea1 d2ce7a2  
d1w5sa2 d1sxjb2 d1d2na\_ d1ny5a2 d1ofha\_ d2gnoa2 d2a5yb3 d1fnna2  
d1u0ja1 d1lv7a\_ d1iqpa2 d2fnaa2 d1ixsb2 d4gita\_ d1sxje2 d1g41a\_  
d1pd212 d1nhya2 d2a2ra2 d1k0dd2 d1f2ea2 d1gsua2 d1f3ba2 d2fhea2  
d2pvqa1 d1tw9a2 d1oyja2 d1e6ba2 d1k0ma2 d3ik7a1 d4is0a1 d1r5aa2  
d1jlva2 d1m0ua2 d3gtub2 d1z9ha2 d1okta2 d1axda2 d1tu7a2 d1k3ya2  
d1zgma1 d1b48a2 d1gnwa2 d1gwca2 d2gsta2 d1glqa2 d1oe8a2 d1pn9a2  
d1v2aa2 d1fw1a2 d1duga2 d3vrda1 d3vrda2 d1fcdc1 d1h1oa2 d1h1oa1  
d1m70a2 d1m70a1 d1g7ea\_ d3h1jd1 d4ilya\_ d1chka\_ d4olta\_ d1qqya\_  
d1gd6a\_ d1livma\_ d2gv0a\_ d1iiza\_ d2z2fa\_ d1j8xa\_ d1ghla\_ d1b9oa\_  
d1741a\_ d1691a\_ d2o4wa\_ d1p37a\_ d1xjta1 d1jtma\_ d2f2qa\_ d4e97a1  
d1mpya2 d1kw3b2 d1kw3b1 d4ghga1 d1tfza1 d3isqa1 d3isqa2 d1sqia1  
d1sqia2 d1lkda2 d1lkda1 d1cjxa2 d1cjxa1 d1sp9b2 d1t47a1 d1t47a2  
d1f1ua2 d1sp8a1 d1sp8a2 d1f1ua1 d1etob\_ d1umqa\_ d1g2ha\_ d1s5ja2  
d1qhta2 d4dlea2 d1tgoa2 d3py8a2 d1q8ia2 d1kfsa2 d2py5a2 d1d5aa2  
d1xvqa1 d1pn0a2 d3hy2a\_ d2cvba1 d1o8xa\_ d1lu4a\_ d1we0a1 d2bmx1  
d2a4va1 d1psqa\_ d1xiya1 d1q98a\_ d1n8ja\_ d1zofa1 d2ggta\_ d3tjja\_  
d4jela1 d3s9fa\_ d2zcta\_ d1qmva\_ d1jfua\_ d2b1ka\_ d5dvba1 d2b5xa1  
d2v2ga\_ d1st9a\_ d3tb2a\_ d4llra\_ d4fh8a1 d1e2ya\_ d1knga\_ d2h30a\_  
d1i5ga\_ d2z9sa\_ d2f8aa1 d1tp9a1 d2b7ka\_ d1nm3a2 d3hvva\_ d2wfc1  
d4kcea\_ d1xvwa1 d4gqca1 d3qpma\_ d4k1fa\_ d1zzoa1 d1gp1a\_ d1prxa\_  
d2m5ta\_ d1cqqa\_ d1wqsa\_ d5bpea\_ d2ipha\_ d1lvoa\_ d2bhga1 d3tnta\_  
d3sjia\_ d3d23a1 d2fyqa\_ d3tloa\_ d3zvea1 d2hrva\_ d3q3ya1 d4asha1  
d1cg2a1 d1yloa2 d1y7ea2 d1y0ya3 d1l1fwa1 d1vixa1 d1fnoa4 d1vhoa2  
d1ysja1 d1z21a1 d2fvga2 d1vgya1 d1r3na1 d2grea2 d1xmba1 g1q71.1  
d1rtqa\_ d1jgta2 d1ea0a3 d1ecfa2 d1q15a2 d1ct9a2 d1ao0a2 d1te5a\_  
d1ys1x\_ d4hs9a\_ d1ispa\_ d1ex9a\_ d1ku0a\_ d3qmma\_ d1lgya\_ d4l3wa\_  
d1gz7a\_ d1lukca\_ d1cr6a2 d1svpa\_ d1mbma\_ d3su6a1 d1cula1 d4agka\_  
d1vcpa\_ d1q31a\_ g1n11.1 d3e90b\_ d3u1jb\_ d1eb6a\_ d1dzka\_ d4tlja\_  
d2a2ua\_ d4wfva\_ d3t1da\_ d4iaxa\_ d3zq3a\_ d2nnda\_ d1i4ua\_ d1kxoa\_  
d1bbpa\_ d1kt7a\_ d1exsa\_ d3s26a1 d1lf7a\_ d1qfta\_ d4gh7a\_ d1z24a1  
d1qabe\_ d1xkia\_ d1ew3a\_ d3bx7a\_ d4iawa1 d1n0sa\_ d1gkab\_ d3kzaa\_  
d2k23a\_ d2l9ca1 d2joza1 d1gm6a\_ d3kffa\_ d3saoa1 d1e5pa\_ d1yupa1  
d1iiua\_ d2tbvc\_ d1c8nc\_ d1x36a\_ d1smvc\_ d1ng0c\_ d4sbvc\_ d1lopoa\_  
d1f2nc\_ d1cixa\_ d1y29a\_ d1v7fa\_ d2jtba\_ d1d1ha\_ d1g9pa\_ d1llupa\_  
d1qk7a\_ d1mb6a\_ d2a2va\_ d1niya\_ d1hvwa\_ d2mpqa\_ d1ie6a\_ d1kqha\_  
d1la4a\_ d2mxoa1 d1d10a\_ d1koza\_ d1qk6a\_ d1emxa\_ d1lqra\_ d1c6wa\_  
d1rmka\_ d1ixta\_ d1eyoa\_ d1cnna\_ d1fu3a\_ d1glpa\_ d1f3ka\_ d1fyga\_  
d1rypd\_ d1irua\_ d1rypc\_ d3unfk\_ d1rypa\_ d1j2pa\_ d1irui\_ d1j2qh\_  
d3unfh\_ d1m4ya\_ d1rypb\_ d1lirul\_ d1lirug\_ d1liru2\_ d1q5rh\_ d1rypg\_  
d1g3ka\_ d1liruf\_ d1q5qa\_ d1e94a\_ d1lirub\_ d1ryph\_ d3ty6a\_ d1liruj\_  
d1liruk\_ d1rype\_ d1lirud\_ d1lirue\_ d3mi01\_ d1rypf\_ d1liruh\_ d2z3ba\_  
d3mka2\_ d1lirul\_ d1ny721 d1a6ca3 d1a6ca2 d1a6ca1 d1pgl22 d1pgl21  
d1pgl11 d1ny711 d1mqta\_ d1d4m3\_ d1fmd3\_ d2mev1\_ g1aym.1 d1ev13\_

d4q4w1\_ d1r1a3\_ d2x5ia\_ d1rhi1\_ glr1a.1 gld4m.1 glrhi.1 d1b35b\_  
d1loopa\_ d4iv1a\_ glpvc.1 glfnp.1 d1fnp1\_ d4gb31\_ d1d4m1\_ d1fmd1\_  
d1lev11\_ d2wzr3\_ glcov.1 d1qqp3\_ glfmd.1 d2x5ic\_ d1rhi3\_ gloop.1  
d1hxsl\_ glhxs.1 d1fnp3\_ d1bev1\_ g2mev.1 d1eah3\_ d1aym1\_ d1pvc3\_  
d1qqp1\_ d1zba3\_ d1h8ta\_ d3vbhc\_ glb35.1 glbev.1 d1hxsl\_ glev1.1  
d1bev3\_ gltmf.1 d1tmf1\_ d1b35a\_ d2mev3\_ g1eah.1 glh8t.1 d1eah1\_  
d4q4w3\_ d1r1a1\_ d1aym3\_ d1pvc1\_ d1zba1\_ d1h8tc\_ d1loopc\_ d1tme3\_  
glqqp.1 d4iv1c\_ gltme.1 d3ubub\_ d1legia\_ d1v7pa\_ d1tdqb\_ d3ubua\_  
d1c3ab\_ d1h8ua\_ d3bx4b\_ d1t8ca1 d1sb2a1 d1qdda\_ d2ziba1 d3cada\_  
d1byfa\_ d1j34b\_ d1jwia\_ d1jzna\_ d1c3aa\_ d1oz7b\_ d1wmza\_ d3bdwb\_  
d1hq8a\_ d1fifa1 d1dv8a\_ d3hupa\_ d1wk1a1 d1umra\_ d2afpa\_ d3bx4a\_  
d1gz2a\_ d1sl6a\_ d1v7pb\_ d3g8ka\_ d1ixxa\_ d1j34a\_ d1jwib\_ d1gl1sa1  
d1y17a1 d1ja3a\_ d1fvub\_ d3bdwa\_ d1sb2b1 d1fvua\_ d1umrc\_ d1oz7a\_  
d4m17a\_ d3cfwa1 d1ypqa1 d1gl1ta1 d3fd4a\_ d3l9jc\_ d4dn8a1 d1v41b\_  
d1rd11\_ d2msba\_ d4w9ta\_ d1jvna1 d4x2ra1 d1ka9f\_ d1qo2a\_ d4axka1  
d1thfd\_ d4u28a\_ d2y88a\_ d4wd0a\_ d1vzwa1 d1eixa\_ d3exra\_ d2ffca1  
d2fdsa1 d3n3ma1 d2czda\_ d1q6oa\_ d2yyua\_ d1vqta1 d1dbta\_ d3ldva1  
d2flia1 d1h1ya\_ d1tqja\_ d1tqxa\_ d1lux8a\_ d1dlya\_ d4i0va\_ d2bkma\_  
d1dlwa\_ d2bmma\_ d2r80b\_ d1cqxa1 d1cg5a\_ d1gcvb\_ d3boma\_ d2h8fb\_  
d2raoa\_ d3bj1a\_ d4hrrb\_ d2r50a\_ d3d1kb\_ d2aa1b1 d3zhwa\_ d3hf4b\_  
d3gdja\_ d1jebb\_ d3bj1b\_ d1x9fb\_ d1wmub\_ d1gcva\_ d3bcqb\_ d3d4xb\_  
d2dc3a\_ d3hf4a\_ d4yu3a\_ d3k8ba\_ d1qpwb\_ d2r80a\_ d3bcqa\_ d1v4wa\_  
d3wtgb\_ d1j17a\_ d4esaa\_ d1a9we\_ d3d1ab\_ d1fsla\_ d4h21a\_ d1v4wb\_  
d1mwca\_ d1vhba\_ d1jeba\_ d1spgb\_ d1h97a\_ d1q1fa\_ d1tu9a1 d3d1aa\_  
d1hdsb\_ d3hyub\_ d2zfb\_ d3fs4a\_ d1oj6a\_ d1shrb\_ d4h21b\_ d4yu3b\_  
d1spga\_ d3hrwa\_ d3qqra\_ d3at5a\_ d4wchd\_ d3hyua\_ d1cg5b\_ d1uc3a\_  
d1hbra\_ d2raob\_ d1outb\_ d4esab\_ d3gdjb\_ d3qqqa\_ d1x9fc\_ d3vrfa\_  
d1litha\_ d3mkba\_ d3d4xa\_ d3mjpa\_ d1j16a\_ d3fh9a\_ d1outa\_ d2dc3b\_  
d1lit2a\_ d3eoka\_ d3g46a\_ d1qpwa\_ d3vrfb\_ d1ch4a\_ d1x9fd\_ d1hdsa\_  
d2zfb\_ d3mkbb\_ d1or4a\_ d3wtga\_ d1a4fa\_ d3fh9b\_ d3bomb\_ d3cy5a\_  
d3at5b\_ d1x9fa\_ d2oifa\_ d4lmb\_ d1cpcb\_ d3v57a\_ d1kn1a\_ d1cpca\_  
d4f0ta\_ d2vjha\_ d4po5b\_ d1eyxa\_ d1alla\_ d4f0tb\_ d1b33b\_ d1b8db\_  
d4h0mb\_ d2vjhb\_ d4l6b\_ d2vmlb\_ d1allb\_ d2vjta\_ d3dbja\_ d2vmla\_  
d2vjtb\_ d4f0ub\_ d1f99b\_ d4rmpa1 d1liaa\_ d1eyxb\_ d2uulb\_ d4lmsb\_  
d4f0ua\_ d2bv8a\_ d1f99a\_ d2bv8b\_ d2c71b\_ d3dbjb\_ d4rmpb1 d1b8da\_  
d4h0ma\_ d3v57b\_ d1kn1b\_ d1liab\_ d2uula\_ d2j96a\_ d1kyqa1 d3ia2a\_  
d1a88a\_ d4dgqa1 d1hkha\_ d1zoia\_ d2xqfa\_ d1ea5a\_ d1f6wa\_ d1dx4a\_  
d1qe3a\_ d1k4ya\_ d4qwwa\_ d2ha2a\_ d1gl9b1 d1gkub1 d2qvba\_ d2v9za\_  
d4kafa1 d1pv8a\_ d1w5qa\_ d2c1ha\_ d1l6sa\_ d1f74a\_ d3l21a\_ d2e1da\_  
d1to3a1 d1w3ia\_ d1sfla\_ d1n7ka\_ d1vcva1 d4imea\_ d1wa3a\_ d2ocza1  
d1f2ja\_ d3m16a\_ d2yxga\_ d1ub3a\_ d3a5fa\_ d1fbaa\_ d1l6wa\_ d1xfba1  
d1wx0a1 d1vpxa1 d1ojxa\_ d1mxsa\_ d2a4aa1 d1xkya1 d3cq0a1 d3slxa\_  
d1f05a\_ d1fdja\_ d3cpra1 d4d2ja\_ d1g8fa3 d3rp2a\_ glucy.1 d1fuja\_  
d2zchp\_ d3w94a\_ d1si5h\_ d1lo6a\_ g2pka.1 d1cgha\_ d1kigh\_ d1a5ia\_

d3s9ba\_ dlhj8a\_ d1ao5a\_ d2anya\_ dlq3xa1 dlgvza\_ dlazza\_ d4gsoa\_  
d2f91a1 dliaua\_ dlgdna\_ dleufa\_ glfiw.1 dleq9a\_ d4nfea\_ d2rdla\_  
dlspja\_ d1elva1 d1a7sa\_ d1ekbb\_ dlpfxc\_ d1yc0a\_ d2aiqa\_ glfiz.1  
dlfi8a\_ d4k60a\_ d4dgja\_ dlmmaa\_ dl0p0a\_ d3tjva\_ dlpytd\_ dlsgfg\_  
glgg6.1 d2eeka\_ glrtf.1 d1a0ja\_ d3g01a\_ dlpytc\_ d4e7na\_ dladdja\_  
dlz8ga1 d2hlca\_ dlnpma\_ dlbrup\_ gljou.1 dlsgfa\_ dlautc\_ g2hnt.1  
glkdq.1 d3s69a\_ d4crga\_ dlfxya\_ dlbqya\_ dlra6a\_ dlmuka\_ d3gsza\_  
dlkhva\_ dlte9a\_ d2xwha\_ d3uqsa\_ d3hkwa\_ d3n6ma\_ d2cjqa\_ d2xyma\_  
dlteba\_ dlte8a\_ d1s48a\_ dl09a1 d4wfxa\_ d3tyqa\_ d2pgga1 dlm4la\_  
d2bk7a\_ d3fjua\_ dlz5ra1 dlkwwa1 dljqga1 d2clca1 dltda\_ dlh8la2  
d3lgia\_ d3i77a\_ d2z9ia2 d4nsva\_ dl1cya2 d4jcna\_ dlaga\_ dl0s8a\_  
dlhpga\_ dl3ca\_ dl11ja\_ dlqtf\_ d1e69a\_ dlmv5a\_ d3g60a4 gl1i8.1  
dlwqa2 dlji0a\_ dlqha\_ dl1v43a3 d2wmfa1 dl1vpla\_ dl1g2912 d4a82a2  
gl1f2t.1 d2d62a1 d3tuic1 d2bbsa1 d3g60a3 d2ixea\_ dl1g6ha\_ dl1sgwa1  
d2qi9c\_ d3rlfa1 d3b60a1 d3d31a2 d2pzea1 gl1xew.1 dl1jj7a\_ dl10xxk2  
d2onka1 dl1w1wa\_ dl1iwea\_ dl1qf5a\_ dl1vmaa2 dl1nija1 dl1np6a\_ d2p67a1  
d3ihla\_ dl1okkd2 dl1s1a2 dl1s1ma2 dl1iona\_ d2v40a\_ dl1dj3a\_ d3hida\_  
d2vol1a1 d2g0ta1 dl1vcoa2 dl1j8mf2 dl1g3qa\_ dl1xjca\_ dl1qzxa3 dl1hua2  
dl1hua1 d2qm8a\_ dl1dj2a\_ d4ioja\_ dl1cp2a\_ dl1yrba2 dl1hya\_ d3gqba2  
dl1skye3 dl1xp8a1 dl1tf7a2 dl1tf7a1 dl1ye8a1 dl1skyb3 d2qe7d2 d4blta\_  
d4huta\_ d3l1daa2 d4hyya\_ d2i3ba1 dl1crla\_ d3j9tb2 d3ntua2 dl1vdza1  
d2z43a\_ dl1e9ra\_ dl1nlfa\_ d3ziaa2 dl1n0wa\_ dl1g6oa\_ d3ziad2 d3j9ta2  
dl1pzna2 d3gqbb2 d2i49a\_ dl1nnfa\_ dl1xvxa\_ dl1ursa\_ dl1iuda\_ d4mlva1  
dl1twya\_ d3e13x\_ d2nxoa1 d4pfua\_ d3ttma\_ dl1elja\_ d2qmwa1 dl1us5a\_  
dl1y3na1 dl1jeta\_ dl1uqwa\_ d4f19a1 d2esna2 d3thia\_ d3fasa1 d2uyeb\_  
d2xwva1 dl1r91a\_ d2fyia1 dl1pb7a\_ d2ozza1 dl1sw5a\_ dl1nh8a1 dl1vr5a1  
d2g29a\_ dl1xs5a\_ d3lswa\_ d2z23a\_ d3w9va\_ d3tcha\_ dl1q35a\_ dl1z7me1  
d3q27a\_ dl1p99a\_ dl1ve4a1 d2i6ea1 d4mcoa1 d4n8ya\_ dl1eu8a\_ dl1zba1  
dl1hsla\_ dl1ixca2 dl1j1na\_ dl1xvya\_ dl1y9ua\_ d2z22a1 dl1xoca1 d4oera\_  
dl1wdna\_ d5f1qa1 dl1xt8a1 dl1i6aa\_ d4gwoa\_ d4igta1 dl1pc3a\_ d4mmpa1  
dl1o63a\_ d2czla1 d2onsa2 d4mija1 d4ok5a1 d2bmfa1 d2bmfa2 dl1yksa1  
dl1yksa2 dl1jr6a\_ d2qeqa1 d2j1qa1 dl1a1va2 dl1eh3a\_ d3skpa\_ dl1dtza2  
dl1ieja\_ dl1jnfa2 dl1ce2a1 dl1jnfa1 dl1b1xa2 dl1b1xa1 dl1jw1a1 dl1jw1a2  
dl1ryoa\_ dl1h76a1 dl1h76a2 dl1etha2 dl1w52x1 d2ppla1 dl1hpla2 dl1lppb2  
d2oxea1 dl1bu8a2 dl1rpl1a2 dl1c4oa1 d2p6ra3 d2p6ra4 dl1oywa2 dl1oywa3  
dl1wrba1 dl1w36b2 dl1w36b1 dl1c4oa2 d3bora\_ dl1t6na\_ d2eyqa5 d2eyqa3  
d2eyqa2 d2zu6a2 dl1veca\_ dl1uaaa1 dl1w36d1 d2g9na1 dl1z3ix2 d2rb4a\_  
dl1hv8a1 dl1hv8a2 dl1t5ia\_ dl1w36c2 d2j0sa2 d2j0sa1 dl1fuka\_ d3hjha1  
dl1z5za1 dl1qdea\_ dl1z63a1 dl1s2ma2 dl1s2ma1 dl1wp9a1 dl1wp9a2 dl1gm5a3  
dl1gm5a4 d3dina4 d3dina3 dl1w36c1 dl1z3ix1 dl1nkta3 dl1nkta4 dl1uaaa2  
dl1w36d2 gl1qhh.1 d2fwra2 d2fwra1 d3q3ma\_ dl1za0a1 d2inca\_ dl1jk0a\_  
d2incb\_ dl1mhyb\_ d3hf1b\_ dl1mtyb\_ dl1r2fa\_ d2uw1a\_ dl1mhyd\_ d3n37a\_  
dl1afra\_ dl1oquc\_ dl1syya\_ dl1mtyd\_ d2o1za\_ dl1uzra\_ dl1smsa\_ d2fkza\_  
dl1zujal dl1s3qa1 d2fjca1 dl1z6om1 dl1veia\_ d4dyya\_ dl1jiga\_ d3gvya\_

d2pyba\_ d4cy9a1 d3bvfa1 d1r03a\_ d2cf7a\_ d1nf4a\_ d1zs3a1 d4iwka\_  
d3ka8a\_ d3np0x\_ d1n1qa\_ d11b3a\_ d4e6ka\_ d1z6oa1 d2fzfa1 d4dyua\_  
d3ge4a\_ d1jgca\_ d4am4a\_ d2z6ma\_ d1ji5a\_ d1vlga\_ d11koa1 d1krqa\_  
d3qz3a\_ d1o9ra\_ d2ffxj\_ d1yv1a1 d2v2pa\_ d1j30a\_ d4di0a\_ d1dpsa\_  
d1oewa\_ d2qzxa\_ d2asia\_ d1psoe\_ d1miqa\_ d2h6ta\_ d1pfza\_ d1lizda\_  
d3hd8a\_ d1j71a\_ d1dpja\_ d4aa9a\_ d1t6ex\_ g1b5f.1 g1lya.1 g1htr.1  
d1qdma2 d1bxoa\_ d1wkra\_ d1tzsa\_ d1libqa\_ d2qzwa\_ d1bdqa\_ d3ggta\_  
d3ixoa\_ d1mrxa\_ d2haha\_ d1tw7a\_ d4njsa\_ d1sgua\_ d2p3da\_ d1nsoa\_  
d3d3ta\_ d2rkfa\_ d1c6ya\_ d2rspa\_ d3ogpa\_ d3ekwa\_ d2o4na\_ d2j9ja\_  
d1baia\_ d3ggua\_ d31zua\_ d4npua\_ d4j55a\_ d2r8na\_ d2fxda\_ d2p3ca\_  
d4dqea\_ d3ttpa\_ d3t3ca\_ d2p3aa\_ d2hc0a\_ d2fdda\_ d3mwsa\_ d1h4ra3  
d4y18a1 d2a16a3 d1wgda1 d1wggal d4q5eb\_ d1wjna1 d1se9a\_ d3n3kb\_  
d1wz0a1 d1we6a1 d2m0xa\_ d2gbka\_ d3rt3b1 d1wh3a1 d1sifa\_ d2ekek2  
d4ii2b1 d4hk2a1 d1c3ta\_ d1m94a\_ d1wgha1 d1ttna1 d1wx8a1 d3v6cb1  
d2ma9b\_ d4i61b1 d1bt0a\_ d2jvca1 d1iyfa\_ d2k1fa\_ d1wxva1 d1wf9a1  
d1t0ya\_ d2io0b2 d1x1ma1 d2gbma\_ d1zw7a1 d2m17a\_ d1ud7a\_ d1we7a1  
d21wpa\_ d2gbja\_ d1wjua1 d1v6ea1 d1v86a1 d4eewa\_ d1wiaa1 d4icva\_  
d4gu2a\_ d1wx7a1 d1wy8a1 d4hjka1 d2faza1 d1v5oa1 d1tafa\_ d1bh9b\_  
d1jfib\_ d1q9ca\_ d1h3ob\_ d2byka1 d1n1ja\_ d4g92b\_ d1bh9a\_ d1jfia\_  
d1h3oa\_ d2bykb1 d1n1jb\_ d4lu0a\_ d1of8a\_ d3unda1 d3e9aa1 d1vr6a2  
d2qkfa\_ d1d9ea\_ d1o60a\_ d2ftba\_ d1pmpa\_ d2rcqa1 d1fdqa\_ d4lkpa\_  
d1sa8a\_ d1vyfa\_ d1lpja\_ d3vg7a1 d4azqa1 d1o8va\_ d5bvqa\_ d1p6pa\_  
d2qo4a\_ d1opba\_ d1yiva1 d1o1va\_ d4bvma1 d4tkba\_ d4i3ba\_ d1bwya\_  
d1ftpa\_ d1ggla\_ d4gkca\_ d1cbia\_ d3p6da1 d1kqwa\_ d2a0aa1 d1adqa1  
d1fnga1 d1uvqb1 d1zs8a1 d2vola1 d2vola2 d1mfb12 d2jelh2 d1uwel2  
d3qq4b1 d1kjvb\_ d1k5na1 d1osph2 d4odh12 d1ow0a1 d1ow0a2 d1bfob2  
d319ra2 d3jtth1 d2fath2 d4elkb2 d1fn4b2 d2xfxb\_ d1pg7x2 d1cqka\_  
d4k71b2 d11k2a1 d1eapb2 d41fhg2 d1i4fa1 d2nw2a2 d1kfah2 d1mhca1  
d1h3ua1 d1wejh2 d1h0db2 d1a5fh2 d1kcvh2 d1mjuh2 d1qqda1 d1kcrh2  
d1k8ia1 d3huja2 d2nnab1 d1nfd2 d3mffb2 d1s9va1 d11k3h2 d1q0xl2  
d1fv1b1 d1neza1 d4rfeb2 d1r3ha1 d1a6tb2 d1kjva1 d1pz5b2 d1onqa1  
d2bc4a2 d1de4a1 d1k8da1 d1tcra2 d1dn0b2 d1nfde2 d2xwtb2 d1bfoa2  
d1mexh2 d1iakb1 d1ypzf2 d4f7ea2 d1q7212 d2fbjh2 d1fe8h2 d1clzh2  
d1fngb1 d1uvqa1 d1vgka1 d1c16a1 d4j12a2 d4x99b2 d1igtb3 d1je6a1  
d1q72h2 d1nldh2 d1teth2 d2hmic2 d1i1ca2 d1i1ca1 d1k8ib1 d1q0yh2  
d1kfa12 d3frua1 d1pg7w2 d1u58a1 d1igyb4 d1igyb3 d1hyrc1 d1klub1  
d1deeb2 d1c12b2 d2bc4b2 d2ig2h2 d1kcv12 d3wn5b1 d11k2b\_ d11k312  
d1mjul2 d1sm3h2 d1q0xh2 d1zvsa1 d1ydpal d1u8ib2 d1ypze2 d1kcuh2  
d21j7a\_ d1n4na\_ d2m8bb1 d2kyqa\_ d3psma\_ d1jkza\_ d1jxca\_ d2g11a\_  
d1ugla\_ d4uj0a\_ d2k4ua\_ d1hp2a\_ d2lu9a\_ d1baha\_ d2meoa1 d1wm7a\_  
d1hlya\_ d1n8ma\_ d1j1za\_ d1wpda\_ d1c55a\_ d1pvza\_ d1wt7a\_ d1rjia\_  
d1wz5a\_ d1m2sa\_ d1pjva\_ d1c49a\_ d1qkya\_ d2ktca1 d1wmta\_ d1du9a\_  
d1j5ja\_ d1r1ga\_ d1t0za\_ d2i61a\_ d1t1ta\_ d1sn4a\_ d21kba\_ d1npia\_  
d1wwna\_ d1pe4a\_ d2kbka\_ d2li7a\_ d1djta\_ d2kbha\_ d1dq7a\_ d1sega\_

d1omya\_ d1zywa1 d1jzaa\_ d1iyjb4 d1iyjb5 d1iyjb3 d1o7ia\_ d4ipca1  
d1x3ea\_ d4apva\_ d1jb7a1 d1jb7a2 d1jb7a3 d3kdfa\_ d1ue1b\_ d1wjja1  
d3eiva\_ d1xjva2 d1xjva1 d2ccza2 d1se8a\_ d1l1oc\_ d1jb7b\_ d1qvca\_  
d1qzga\_ d1miua4 d1miua5 d1miua3 d1y14b1 d2nn6i1 d1i94l\_ d2zjra2  
d1smxa\_ d2qamc2 d1hh2p1 d2r7da1 d1rl2a2 d1wfqa1 d3bzka4 d1x6oa2  
d3a0ja\_ d2j01d2 d2ja9a1 d4q15a\_ d1hr0w\_ d1luza\_ d2n3sa\_ d2vnud1  
d1h95a\_ d1go3e1 d2nn6h1 d1ne3a\_ d2mola\_ d1iz6a2 d1jjga\_ d1e3pa2  
d2ix0a3 d2ix0a2 d2lxja\_ d1ueba3 d1ueba2 d2z0sa1 d1u01a1 d2ix0a1  
d2eifa2 d2je6i1 d3i2za1 d2c35b1 d2ahob2 d1t9ha1 d3i4oa\_ d2qall1  
d1jt8a\_ d2nn6g1 d1g6pa\_ d3cama\_ d1i94q\_ d1c9oa\_ d1d7qa\_ d2ba0a1  
d2vnud2 d2vnud3 d1khia2 d2qalq1 d1wi5a1 d1xtda2 d1ny4a\_ d1fvia1  
d1ckma1 d1p16a1 d1x9na2 d1rpma\_ d2shpa1 d1yfoa\_ d1l8ka\_ d2ooqa1  
d1g4us2 d1p15a\_ d1lara2 d1lara1 d1wcha\_ d2fh7a2 d2fh7a1 d3azya\_  
d3wvja\_ d1upsa1 d1ajoa\_ d2hyka\_ d1ajka\_ d2vy0a\_ d1o4ya\_ d3o5sa\_  
d3d6ea\_ d3atga\_ d1dypa\_ d1umza\_ d3i4ia\_ d1c1la\_ d4lbqa\_ d1a78a\_  
d1slta\_ d4no4a\_ d3zsja\_ d3duia\_ d1g86a\_ d1is3a\_ d1hlca\_ d1tdha3  
d1q3ba3 d1ee8a3 d1k82a3 g1qmo.1 g1len.1 d3zyra\_ d1fnya\_ d1n47a\_  
g2ltn.1 d1avba\_ d3usua\_ d1dhkb\_ d1f9ka\_ d1lukga\_ d1g8wa\_ d1g9fa\_  
d1wbfa\_ d3wcsa\_ d1g7ya\_ g1loe.1 d1mvqa\_ d1hq1a\_ d1v6ia\_ d1dbna\_  
d1qnwa\_ d1fx5a\_ d4l8qa\_ d1ioaa\_ d3n35a\_ d3ubra\_ d1qo8a1 d1d4ca1  
d2k3va\_ d1ft5a\_ d1qdba\_ d1m1qa\_ d2j7aa\_ d1h21a\_ d1ogyb\_ d4fasa\_  
d1jnia\_ d1oaha\_ d1sp3a\_ d3h33a\_ d1rwja\_ d19hca\_ d1os6a\_ d3bxua\_  
d3h4na\_ d1i77a\_ d3caoa\_ d1j0pa\_ d2ctha\_ d1duwa\_ d1ofwa\_ d2e84a\_  
d1hh5a\_ d1gyoa\_ d3h34a\_ d1dszb\_ d1a6ya\_ d3cbba\_ d1ynwa1 d1r4ia\_  
d1hcqa\_ d2hana\_ d2hanb\_ d2enval d2n11b\_ d1lola\_ d1cita\_ d2dara2  
d2dara1 d1wyha2 d2dloa2 d1rutx4 d1rutx3 d2cuqa2 d1x41a2 d1x41a1  
d1x3ha2 d1x3ha1 d2d8za1 d1x61a2 d1x6aa1 d1x6aa2 d2cora2 d2cora1  
d1v6ga1 d1v6ga2 d2d8za2 d1x64a1 d1x64a2 d1b8ta1 d2co8a1 d1x63a2  
d2dj7a2 d2dj7a1 d2cu8a2 d2cu8a1 d1g47a2 d1g47a1 d1j2oa1 d1wyha1  
d2dloa1 d1wiga1 d1wiga2 d2cupa2 d2cupa3 d1x68a1 d2d8ya2 d2d8ya1  
d1m3va2 d1x62a1 d1x68a2 d1x61a1 d1b8ta3 d1b8ta2 d2d8xa2 d2d8xa1  
d1x4ka1 d1x4ka2 d2cuqa1 d1m3va1 d2co8a2 d1j2oa2 d1x63a1 d2cura1  
d2cura2 d1x62a2 d1op9a\_ d1y01a1 d1letzb1 d1egj11 d2gsib1 d1nj9a1  
d4jfhdl d1aqk11 d1t2ja\_ d1lo4h1 d1zvya1 d3v4vl1 d4enec1 d1kxtb\_  
d5e8ea1 d2pxya\_ d4weud\_ d1xiwc\_ d2esvd1 d1qnzh\_ d1logae1 d1f4xh1  
d4n1hb\_ d3ezjb1 d3mlwl1 d1kfah1 d1etza1 d1b4jh1 d3cfic\_ d4w68a\_  
d2arja1 d1ek3a\_ d2ok011 d1vera\_ d1uwgh1 d1blnb1 d1fpth1 d1rzga1  
d2giya1 d4m3kb1 d1nc2a1 d2nyyd1 d1ncna\_ d1fbih1 d5dxwa\_ d4fqqa1  
d1dqdh1 d1jfq11 d1kelh1 d1faih1 d1frgl1 d1figl1 d4m6n11 d1fo0a\_  
d4hxb11 d3b5ga\_ d3quyd1 d2h9gb1 d1i8kb\_ d2dd8h1 d2ck0h1 d1eaja\_  
d4w6wb1 d2a6ib3 d1t66d1 d2e27h\_ d1ob1b1 d1f11b1 d2v7na1 d1ad0a1  
d2xt1b1 d1pskh1 d4i13b1 d2op411 d1a0q11 d1uwel1 d1za3a1 d1ncb11  
d4uu9a\_ d1bm3h1 d1cloh1 d1nqba2 d1cf8h1 d4y5va\_ d1mhph1 d5anma1  
d4cdgc1 d4ldeb\_ d1y01b1 d2pcpb1 d1z3gl1 d1dfb11 d1fh5h1 d3g5xa1

d1tzib1 d4dn3l1 d3zhka1 d2b1hh1 d2uyla1 d1f3dh1 d1nj9b1 d2agjh1  
d2h1pl1 d1q72h1 d8fabb1 d1ndmb1 d1rjca1 d4u6hb1 d3upca\_ d2fbj11  
d1osph1 d1tvda\_ d2cjev\_ d4fhbd1 d1bd2d1 d1rz7h1 d3nn8a\_ d1blna1  
d1knoa1 d1nfda1 d2bmkb1 d1dq11\_ d1igyb1 d1igfl1 d12e8h1 d3utza1  
d1nc2b1 d1rihh1 d4mwfb1 d4jvpa1 d1mieh1 d1rhfa1 d1fgn11 d1sbsh1  
d1lp9e1 d1dn0a1 d4lqf11 d1iaih1 d1kgcd1 d1mh5b1 d1gpol1 d2g60h3  
d1f8t11 d2jixd1 d4grwh\_ d1fo0b\_ d1bfob1 d1axsa1 d1u9ka\_ d1nmbh\_  
d1h8na1 d1h8na2 d1jguh1 d4eura1 d3sdy11 d35c8h1 d1w72l1 d1mvub\_  
d1i9rh1 d1ob1a1 d4wenb\_ d1yeeh1 d3ietc1 d1f58h1 d1ad0b1 d1mqkl\_  
d1nbvh1 d4b50a\_ d3r8bb\_ d1baf11 d1mamh1 d4rgne1 d2gsgb\_ d35c8l1  
d1bafh1 d1ai1h1 d2pcpa1 d2fath1 d2x1pa\_ d1orsb1 d1libgl1 d1shma\_  
d1a2yb\_ d1u0qa\_ d2coqa\_ d1hilb1 d1qfwi\_ d1jv5b\_ d1fn4b1 d5e0qa\_  
d1nsnh1 d1plgl1 d4ocxl1 d1kb5h1 d1rzhf1 d1pg7x1 d2fx7h1 d2oi9c\_  
d1l7i11 d3eyva1 d1d5i11 d4ffyl\_ d1tet11 d1a6wh\_ d1ac6a\_ d3dvfa\_  
d1nfde1 d1mimh1 d1ri8a1 d1jhlh\_ d3dura\_ d1fskb1 d1f97a1 d3so3b1  
d2ak4d1 d1lp9f1 d4z7wf1 d1l7th1 d4y5ya\_ d4x7ec1 d1emth1 d1ikfl1  
d1nlbh1 d4utal1 d1bjma1 d1eapb1 d1u6ah1 d2dtgd1 d1kj2b\_ d1xeda1  
d1cleh1 d1fgvh\_ d2bnub1 d2fb4h1 d2dtgb1 d1ktrh\_ d1jpth1 d1qkz11  
d4hepg\_ d2atpb1 d1flrh1 d2hrpl1 d1mvfa\_ d1iaim1 d3k80a1 d2jb5h1  
d3zkxc\_ d4grwe\_ d1it9h1 d1rhhb1 d3w9ec\_ d1e4wh1 d1sy6h1 d2j6eh1  
d3qxta\_ d1jglh1 d1p7ka1 d1tzhb1 d4n8pa1 d1gaf11 d2jelh1 d1wioa2  
d4i0cc1 d1cicb1 d1lmka2 d1lmka1 d1iqwh1 d1orqb1 d1ejoh1 d1jnlh1  
d4zgl1a\_ d43c9b\_ d1ggbl1 d1wejh1 d3q6fa1 d1f3dj1 d3c6la1 d1bqlh1  
d3p9wb\_ d1a3r11 d1h0db1 d2uzil\_ d1eo8l1 d1qfwl\_ d1n7ml1 d1igja1  
d1c5ch1 d2a9mh\_ d1rmfh1 d1fj1b1 d4heme\_ d1ccza1 d1a5fh1 d1ogad1  
d1dlfh\_ d1qa9b\_ d1vgel1 d3qskb\_ d1sjxa\_ d4ozfg1 d1sq2n\_ d1qd0a\_  
d1kcvh1 d1c5db1 d3qcull d3bn9d1 d1mjuh1 d4y8dc\_ d7fabh1 d3dvgb1  
d1lo0l1 d1a6tb1 d1gigh1 d1kcrh1 d2hwz11 d1yjdc1 d3clfl1 d4krna\_  
d1d17l\_ d1e6ol1 d1mexh1 d3r0ma\_ d4kkna\_ d1fnsl1 d1oaqh\_ d1rzia1  
d1ucbh1 d1ncw11 d4b41a\_ d1nfdfl d2mpah1 d2d7t11 d4grwf\_ d4b5ea\_  
d1lk3h1 d3u79a\_ d4u3xa\_ d1ghfl1 d1bvkb\_ d1mcww1 d1b88a\_ d1jrhh1  
d32c2b1 d4wemb\_ d1dsfh\_ d1op3h1 d1ce111 d1iqda1 d1qoka1 d1qoka2  
d1qfuh1 d2crya1 d1ay1h1 d1oaql\_ d3ab0b\_ d1rur11 d1t4kb1 d1bz7b1  
d1n0xh1 d1for11 d1lucbl1 d4w6yb\_ d43c9a\_ d2aabl1 d1tzia1 d4n1ca\_  
d1k6qh1 d3g9ab\_ d4tvsa1 d1igmh\_ d1pz5b1 d3dx9a1 d3wxwh\_ d1nakh1  
d1kcul1 d3eaka\_ d4qlra1 d1cr9l1 d1d9ka\_ d1f4x11 d1deea1 d2i27n2  
d1c12a1 d2orbl1 d1j8hd1 d1mcph1 d1c5da1 d1kenh1 d1bd2e1 d1h5ba\_  
d4x7fc1 d3upaa\_ d1t3fa1 d1indh1 d2dtgc1 d4hc111 d1zv5a1 d4wgvb\_  
d1uwgl1 d4f37k1 d1aqkh1 d1vesa\_ d3zkqd\_ d1fpt11 d1lo4l1 d1knob1  
d3rrqa\_ d1ct8b1 d4orz\_ d1mlbb1 d4hgkc1 d1dqdl1 d1bogb1 d4ozhe1  
d1dr9a1 d1i7za1 d1dn0b1 d1kell1 d1rzib1 d1ypzf1 d1wtla\_ d1hkfa\_  
d1fail1 d1figh1 d2vyre\_ d1sjva\_ d1ohqa\_ d1bfoa1 d1pkqb1 d1mjul1  
d1b4j11 d1nsn11 d2arjb1 d1p4bh\_ d4aj0a\_ d3nn8b\_ d2rcja1 d1f2xk\_  
d4v1dd\_ d1adqh1 d2eksa\_ d4k3ga\_ d1jfqh1 d1uweh1 d1frgh1 d4gftb\_

d1uz8b1 d4n1ea\_ d1bm3l1 d1cl0l1 d3mcka1 d2vq1a1 d1ae6h1 d4aq1b1  
d1uj3b1 d1nbqa1 d1fh5l1 d2ck0l1 d2ywza\_ d1q72l1 d4nbxb\_ d1hila1  
d4hzb1 d2j88l1 d1zmya1 d1cd0a\_ d1a4ka1 d1pskl1 d1a0qh1 d4krmb\_  
d1ncbh1 d2fbjh1 d1j8he1 d1i3ua\_ d1cf8l1 d1fe8h1 d2plya1 d1eeqa\_  
d2x89a\_ d1o10a\_ d2r0lh1 d1ub5a1 d1dfbh1 d3eyvb1 d4jdvb1 d4p2cg\_  
d2gsia1 d2agjl1 d1u3ha1 d2h1ph1 d1rihl1 d1fskc1 d1boga1 d2a77l1  
d1ospl1 d1qfoa\_ d3dwta\_ d2fx7l1 d1rz7l1 d3stba1 d1pkqa1 d1b6da1  
d1dzba2 d1dzba1 d1kj2a\_ d4l1ha\_ d1rzgb1 d1dqlh\_ d12e8l1 d1mie11  
d1jmaa\_ d1sbsl1 d1fgnh1 d1f58l1 d1mqkh\_ d1ndgb1 d3qegl1 d1iail1  
d2aw2a1 d1tqbc1 d3fo2a1 d4dkaa\_ d1f8th1 d2g60l1 d2ywy\_ d1uj3a1  
d1yc7a\_ d3bd3a\_ d4w6xb1 d1nmb1\_ d1i8ka\_ d1rjlb1 d1ypze1 d1p7kb1  
d1kxqe\_ d1gpoh1 d2z4qa1 d1w72h1 d1i9rl1 d4qgya1 d4xt1c\_ d2qqnh1  
d1cica1 d3c08h1 d2cd0a\_ d2bdnh1 d1hnga1 d1maml1 d1nldh1 d1cr9h1  
d4lcih1 d3bkyh1 d3qg7l1 d1ai1l1 d1kxvc\_ d4iosd\_ d1l7ih1 d2x1qa\_  
d1ub6b1 d3k74b\_ d1ibgh1 d1teth1 d1igya1 d1hxma1 d2x6ma\_ d2e7la\_  
d5e03a\_ d1qfwm\_ d2r0kh1 d1igjb1 d1rurh1 d1plgh1 d1mj8h1 d1yuhb1  
d3fmg11 d1rzfl1 d1emt11 d1ad9b1 d1igtb1 d1nlb11 d1d5ih1 d3k7ua\_  
d4ffyh\_ d1bwwa\_ d3dvgal d1a6ta1 d1fgvl\_ d4qxgl1 d1mim11 d1jhl1\_  
d2hffb1 d2hh0l1 d1qkzh1 d1l7tl1 d1afvh1 d1iaii1 d2cjuh\_ d1um5h1  
d2ghwb2 d2ghwb1 d1kgce1 d2fgwh1 d1ikfh1 d1dvfd\_ d2i24n1 d2xtjb\_  
d1za3b1 d2yc1a\_ d2hh0h1 d2x1oa\_ d1bvka\_ d1rjla1 d5e7ba1 d1igta1  
d1il1b1 d2fb4l1 d1mvua\_ d1jptl1 d32c2a1 d1fvca\_ d1iqdb1 d2hrph1  
d2p4ab\_ d4qo1a\_ d1p2cb1 d1wt5c\_ d1t4ka1 d5c1mb\_ d1it9l1 d1bz7a1  
d1b2wh1 d1e4wl1 d1jnl11 d1yedb1 d1za6b1 d3u7aa\_ d1igfh1 d3gnml1  
d1orsa1 d1wejl1 d1a2ya\_ d1hxmb1 d1gafh1 d2j4wh1 d1pz5a1 d1j05a\_  
d1a3rh1 d4fq1l1 d1qfwh\_ d1eo8h1 d1n7mh1 d4s1la\_ d1kegh1 d5da4a\_  
d1iqw11 d3whxb1 d1vgeh1 d1deeb1 d1c12b1 d1t2ql1 d1ad9a1 d3gsnb1  
d3b2uc1 d1ggbh1 d1t3fb1 d1nakl1 d4ocmc\_ d1lila1 d2v7hb3 d2esve1  
d1mcoh1 d2qr0b1 d2q3aa\_ d1ct8a1 d1kcr11 d2pxyb\_ d2uzih\_ d5c3ld\_  
d3durb\_ d1c5cl1 d2ak4e1 d1d17h\_ d1xiwd\_ d1mlba1 d1rmfl1 d1i7zb1  
d1dlfl\_ d2xa3a\_ d5bq7b1 d1dqqb1 d3h42l1 d1egjh1 d1kcv11 d1fe8l1  
d2j6e11 d1f3rb2 d1lk3l1 d1sm3h1 d1q0xh1 d1ghfh1 d7fab11 d1igch1  
d1lo0h1 d4idla\_ d5c2bl\_ d1jrh11 d1lilla1 d3zhda1 d4kfzc\_ d1b0wa\_  
d1e6oh1 d1mexl1 d4krpb\_ d1fnsh1 d1ncwh1 d4hgma\_ d4eigb1 d4rzca\_  
d2mpa11 d4y5xa\_ d5en2b1 d3lrga1 d4ej1c1 d1rhha1 d1j05b\_ d1forh1  
d1q9wb1 d2wzpd\_ d2aq2a1 d1h0da1 d3revb1 d2ij0c1 d1tzha1 d4m7jl1  
d1k6ql1 d3b9kc1 d1igml\_ d3qeua1 d1dsfl\_ d1ce1h1 d1kcu11 d1zvha1  
d1zvoa1 d1tqbb1 d1ay1l1 d2qscl1 d2cgrh1 d1nl0h1 d1ken11 d3eo0a1  
d4n9ob1 d1n0xl1 d3k1kc\_ d1c4qa\_ d1prtc1 d2wv6d\_ d1prtfl\_ d1l1trd\_  
d4l63b1 d1r4pb\_ d1prtd\_ d1t10f\_ d2bosa\_ d1prtb1 d3chbd\_ d2aq2b1  
d1ck1a1 d1enfa1 d1i4pa1 d1v1oa1 d1et9a1 d1esfa1 d2g9hd1 d4ohja1  
d1klud1 d1bxta1 d1eu3a1 d1ty0a1 d1fnua1 d2qaln1 d2cqva1 d1fhga\_  
d2k1ma\_ d2d12a1 d1biha3 d1biha1 d1biha4 d3qp3a1 d1glca\_ d1gxea\_  
d1cvsc2 d1cvsc1 d1xmwa2 d1m4ka2 d2otpa2 d1biha2 d1rhfa2 d2fcba2

d2fcba1 d1wwbx\_ dlgsma2 dlepfa1 dlepfa2 d2dava1 dlwaaa\_ d1f97a2  
d1x44a1 d1vcaa2 d1fnla2 d1fnla1 d3b5ha2 d3h8na2 d3h8na1 d1bjba1  
d1bjba2 d1pd6a\_ d1f2qa2 d1f2qa1 d3cx2a\_ d1nbqa2 d3b5ha1 d1n26a1  
d1xiwb\_ d1xaua\_ d1fltx\_ d2ifga1 d1olla1 d1olla2 d1cs6a4 d1cs6a3  
d1cs6a2 d1cs6a1 d2gw5a2 d1sy6a1 d1xiwa\_ dlucta2 dlucta1 dlry7b2  
d1gl4b\_ d1qz1a3 d1olza1 d2c9aa1 d1wwca\_

**Family-82 (d.15.1.1)**

**Positive dataset contains 45 protein sequences.**

d1wgda1 d1wggal d4q5eb\_ d1wjna1 d3n3kb\_ d1wz0a1 dlwe6a1 d2m0xa\_  
d2gbka\_ d3rt3b1 d1wh3a1 d1sifa\_ d2ekec2 d4ii2b1 d4hk2a1 d1wgha1  
d1ttna1 d1wx8a1 d3v6cb1 d2ma9b\_ d4i61b1 d2jvca1 d2k1fa\_ d1wxva1  
d1wf9a1 d2io0b2 d1x1ma1 d2gbma\_ d1zw7a1 d2m17a\_ dlwe7a1 d2lwp\_a  
d2gbja\_ d1wjua1 d1v6ea1 d1v86a1 d4eewa\_ dlwiaa1 d4icva\_ d4gu2a\_  
d1wx7a1 d1wy8a1 d4hjka1 d2faza1 d1v5oa1

**Negative dataset contains 3980 protein sequences.**

d1m32a\_ d1libja\_ d1c7na\_ d1iuga\_ d4q75a\_ d2bkwa1 d1t3ia\_ d1n8pa\_  
d1qz9a\_ d1jff9a\_ d1eg5a\_ d1p3wa\_ d3kgwa\_ d1cl1a\_ d2ctza1 d1vjoa\_  
d2rfva\_ d1gc0a\_ d1cs1a\_ d1d2fa\_ d2ch1a1 d1qgna\_ d1pffa\_ d1orva2  
d1xfda2 d1u08a\_ d1lc5a\_ d1b5pa\_ d2ay1a\_ d1bw0a\_ d3pd6a\_ d7aata\_  
d2csta\_ d1j32a\_ d1fg7a\_ d4wlha\_ d1o4sa\_ d1v2da\_ d1gdea\_ d1m6sa\_  
d1v72a1 d1svva\_ d1wsta1 d2f8ja2 d1lk9a\_ d1vp4a1 d1xi9a1 d2gb3a1  
d1yaaa\_ d1jx4a2 d3gv5b1 d1t94a2 d3bq0a2 d2cfba1 d1dfoa\_ d1o69a\_  
d1bj4a\_ d3k28a\_ d2bwpa\_ d3lg0a\_ d2fnua\_ d3ou5a\_ d1z7da1 d1b9ha\_  
d1iaya\_ d4msoa\_ d1bs0a\_ d1s0aa\_ d1sffa\_ d3tqxa\_ d1mdoa\_ d3qboa\_  
d3pgya\_ d1bjna\_ d2dkja\_ d1ejia\_ d1vefa1 d4wxga\_ d3bs8a\_ d3gbxa1  
d1w23a\_ d1r0ka3 d1j5pa3 d1vkoa2 d1vm6a2 d3qvsa2 d1gr0a2 d1p1ja2  
d1f56a\_ d1bypa\_ d1azca\_ d1ws8a\_ d3u25a\_ d1cuoa\_ d1lid2a\_ d1rkra\_  
d2iaac\_ d4dp1x\_ d1nwpa\_ d2gima\_ d2i7sa\_ d1qhqa\_ d1gyca3 d1hfua2  
d1kbva1 d1kbva2 d1sdda1 d1sdda2 d1gyca1 d1gyca2 d1mzya1 d2bw4a1  
d1aoza1 d1aoza3 d1aoza2 d1kyaa2 d1kyaa3 d1kyaa1 d1mzya2 d4e9sa1  
d1sddb1 d1sddb2 d1hfua1 d1hfua3 d1oel1a2 d1oel1a1 d1v10a2 d1v10a3  
d1v10a1 g1f8v.1 d1novc\_ d2bbvc\_ d2bema\_ d1pama1 d1ea9c1 d1qhoa1  
d2fhfa2 d2fhfa1 d1k3ia1 d1j0ha1 d1cxla1 d2bhua1 d1edqa1 d1f1sa2  
d1ut9a2 d1gvia1 d1txka1 d2phla2 d2phla1 d1fxza2 d1fxza1 d1lrha\_  
d1uija1 g1dgw.1 d2v09a\_ d1uika2 d1uika1 d1dgwa\_ d1ep0a\_ d2pa7a1  
d1wlta1 d1nxma\_ d2c0za1 d1ds6b\_ d1fstb\_ d1ex0a1 d1g0da1 d1v70a\_  
d2f4pa1 d1yhfa1 d2b5ea2 d2b5ea3 d2b5ea1 d2b5ea4 d2kp1a1 d2kp2a1  
d1hyua3 d1hyua4 d1j08a1 d1au7a2 d1e3oc2 d2ovga\_ d1sq8a\_ d1rzsa\_  
d3kz3a\_ d3orca\_ d3gpdg2 d2q49a2 d1hdgo2 d2g17a2 d2cvoa2 d2czca1  
d3pwka2 d1obfo2 d1i32a2 d1zyao2 d2pkqo2 d1b7go2 d2hjsa2 d1cf2o2  
d1vkna2 d1nvmb2 d1ux8a\_ d4i0va\_ d2bkma\_ d1dlwa\_ d2bmma\_ d2msya\_  
d2djoa1 d2r5za\_ d1au7a1 d1f43a\_ d2lmda1 d1akhb\_ d1s7ea1 d3nara\_  
d1zq3p1 d2craa1 d1mija\_ d4uuta\_ d3a01a\_ d1x58a1 d3rkqa1 d3cmya1  
d2cqxa1 d2da6a1 d1e3oc1 d1fjla\_ d1mh3a1 d1ig7a\_ d1x41a1 d1wh7a1



d1gt0c1 d2mw8a\_ d1lfup\_ d1x2ma1 d1b72a\_ d1wi3a1 d1wjha1 d1x2na1  
d1mnmc\_ d2cuea1 d3k2aa\_ d2hosa\_ d2jwta2 d1pufa\_ d1octic1 d2hi3a\_  
d1b8ia\_ d4j19a\_ d3lnqa\_ d1wh5a1 d1b8ib\_ d1fexa\_ d2cqra1 d1guua\_  
d1ug2a1 d2cqqa1 d2ajea1 d4a69c\_ d1h8ac1 d2crga1 d2iw5b1 d1xc5a1  
d1ofcx1 d2cu7a1 d1wgxa1 d2cjja1 d2ckxa1 d1gvda\_ d1ligna2 d1bl0a1  
d1bl0a2 d1d5ya1 d3lv8a\_ d1s3ga1 d1zaka1 d1s4qa\_ d3tvta2 d1uf9a\_  
d1khta\_ d1ckea\_ d1osna\_ d1p5zb\_ d4tmka\_ d3cm0a\_ d1tmka\_ d1jaga\_  
d3h86a\_ d1t0hb\_ d1nn5a\_ d2h92a\_ d3kb2a1 d2c95a1 d1yj5a2 d1kgda\_  
d1ly1a\_ d2ak3a1 d1vyva2 d1deka\_ d2grja1 d1p3ja1 d1y63a\_ d1e4ya1  
d1s96a\_ d3iija1 d1lvga\_ d1vyua2 d4e22a\_ d1qf9a\_ d1jjva\_ d1q3ta\_  
d1ki9a\_ d1lw7a2 d1teva\_ d1kjwa2 d1gsia\_ d2iyva2 d1kaga\_ d1viaa\_  
d1e6ca\_ d1g3ma\_ d1j99a\_ d1t8ta1 d1nsta\_ d1fmja\_ d1zrha\_ d1ls6a\_  
d2a3ra\_ d1aqua\_ d2zptx\_ d3ckla\_ d1teta\_ d1q44a\_ d2gwha\_ d1odfa\_  
d1uj2a\_ d4gi7a\_ d2jeoa1 d1rz3a\_ d1z0ja1 d3umra2 d3gj0a1 d2gaoa1  
d1yzga1 d1x3sa1 d1g7sa4 d1puja\_ d1udxa2 d1kk1a3 d2o52a\_ d1jwyb\_  
d1zcaa2 d1zcba2 d2fv8a1 d2cjwa\_ d3dz8a1 d1xzpa2 d1vg8a\_ d4qxaa\_  
d2ew1a1 d1x1ra1 d2bcgy\_ d3doea1 d3cona\_ d3rega\_ d3wyga\_ d1upta\_  
d2b6ha1 d1zd9a1 d1lnza2 d1r5ba3 d1n0ua2 d1r2qa\_ d2f91a1 d2rhda\_  
d3q3jb\_ d3q85a\_ d1efma1 d1r8qa\_ d2gf9a1 d2akab1 d1ek0a\_ d1z08a1  
d2gcoa1 d2dyla2 d4g01b\_ d2cxxa1 d1svia\_ d3q72a\_ d1ni3a1 d4ac9a4  
d2erxa1 d2bmea\_ d1wxqa1 d2gf0a1 d4ldja1 d1zunb3 d1d5ca\_ d4lv5b\_  
d1efca3 d1kmqa\_ d2g6ba1 d3lrpa\_ d1tada2 d2y8ea\_ d4rd4a1 d1z06a1  
d2heia\_ d3a58b\_ d1u0la2 d1d2ea3 d1zj6a1 d2ocba\_ d3rwoa\_ d1mr3f\_  
d2e9sa1 d4u5xa1 d2iwra\_ d2fn4a1 d3bwdd\_ d2nzja1 d2atva1 d2ksqa\_  
d3l43a\_ d1mkya2 d1mkya1 d1wmsa\_ d1jnya3 d2rmka\_ d1f6ba\_ d1f60a3  
d1gota2 d1jala1 d2fh5b1 d1g16a\_ d2wblc\_ d1m7ba\_ d1wf3a1 d1f5na2  
d1t9ha2 d1z6xa1 d1z0aa1 d2fg5a1 d2a5ja1 d2bcjq2 d1s0ua3 d1ky3a\_  
d4y0va\_ d4lhwa\_ d2qmea1 d2atxa1 d1egaa1 d1ryha\_ d1moza\_ d1nrjb\_  
d2erya1 d3bfka\_ d1puia\_ d1fzqa\_ d3j3az1 d3t5ga\_ d1shza2 d3defa\_  
d2f7sa1 d3raba\_ d3tsoa\_ d3aq4a\_ d2a17a1 d3sfva1 d3bc1a\_ d2ncda\_  
d1sdma\_ d3h4sa1 d2heha\_ d2grya\_ g3kin.1 d1br2a2 d1goja\_ d1f9va\_  
d2mysa2 d1lkxa\_ d3t0qa\_ d4db1a1 d3gbja\_ d1ry6a\_ d1v8ka\_ d1vava\_  
d1uaia\_ d1k8ka2 d1k8ka1 d3uleb1 d3i33a2 d3i33a1 d1bupa1 d1dkgd2  
d4ci6a2 d1jcf1a1 d4a2ba2 d2fxua1 d1yaga2 d1yaga1 d4cbua2 d1bupa2  
d1liqca2 d1liqca1 d1eb7a2 d1eb7a1 d1nmla2 d1nira1 d1qksa1 d1zc6a1  
d1zbsa1 d1zbsa2 d1zc6a2 d2ch5a2 d2ch5a1 d1zxo2a1 d1zxo1a1 d1hroa\_  
d4gedb\_ d3zooa\_ d1mz4a\_ d1gu2a\_ d1f1fa\_ d1dvva\_ d1c6ra\_ d1c75a\_  
d1e29a\_ d1gdva\_ d1cnoa\_ d1h32b\_ d1co6a\_ d2bh4x\_ d2aiua\_ d5cytr\_  
d1jdl1a\_ d1i8oa\_ d2zboa\_ d3dmia\_ d1ls9a\_ d1wvec\_ d2yk3a\_ d3ph2b\_  
d1dw0a\_ d5aura\_ d1ql3a\_ d1qn2a\_ d1f1ca\_ d4zzva\_ d2xspa\_ d1eg1a\_  
d4v20a\_ d1ojja\_ d4ipma1 d4csia\_ d3pfza\_ d3ovwa\_ d2yoka\_ d2nqya\_  
d1h4ga\_ d1hixa\_ d1oa2a\_ d1olra\_ d3b7ma\_ d4h7ma1 d3wp3a\_ d2vgda\_  
d1ligoa\_ d3zsea\_ d2nlra\_ d3wx5a\_ d1oa3a\_ d1pvxa\_ d1m4wa\_ d1f5ja\_  
d1oa4a\_ d1ks5a\_ d4ixla1 d2a6za1 d3a4ua\_ d2a6va1 d3sital d1levsa\_

d1cnt1\_ d1pvhb\_ d1z7ca\_ d1huwa\_ d1rhga\_ d1f6fa\_ d1f45b\_ d1i1rb\_  
d1axia\_ d1etea\_ d3tgxb\_ d1scfa\_ d2z3qa1 d3qbl1a\_ d1hula\_ d1m48a\_  
d4nkqb\_ d1eera\_ d5e4ea\_ d2o27a\_ d3b5ka\_ d2psma1 d4zf7a\_ d3uf5a\_  
d4x51a\_ d1d9ca\_ d4ypgc1 d3oq3a\_ d1lqsl\_ d1n1fa\_ d1au1a\_ d1wu3i\_  
d3bes1\_ d3ux9a\_ d4dnxa2 d1m8pa2 d1g8fa2 d1jhda2 d1x6va2 d3rbaa\_  
d2qtra\_ d1nupa\_ d3l92a\_ d1f9aa\_ d2h29a\_ d1vlha\_ d1od6a\_ d1lw7a1  
d1mrza2 d4ruka\_ d2e17a\_ d1liq0a2 d1irxa2 d1r6ta2 d1ivsa4 d2cyba\_  
d1rqga2 d1j09a2 d2yxna\_ d1f7ua2 d1h3fa1 d1ffya3 d2g36a1 d1jila\_  
d1n3la\_ d1i6la\_ d1pfva2 d1h3na3 d3n9ia\_ d3sz3a1 d1m4la\_ d2bk7a\_  
d3fjua\_ d1z5ra1 d1kwma1 d1uwya2 d1jqga1 d2c1ca1 d1dtda\_ d3sw2a\_  
d1moxc\_ d1dx5i3 d1edmb\_ d1autl2 d1autl1 d1dval1 d1szba2 d1kigl\_  
d2y5fl\_ d1ijqa2 d1gk5a\_ d1g1sa2 d1nt0a3 d1xdtr\_ d1lmja2 d1lmja1  
d1nzia2 d2wphe\_ d1klil\_ d1pfxl2 d1pfxl1 d1p9ja\_ d1g1ta2 d1f7ea\_  
d4yzub\_ d2mgpa1 d1b9wa1 d1b9wa2 d2mgpa2 d1ob1c1 d1n1ia2 d1n1ia1  
d2npra2 d2npra1 d1g14a2 d1m1xb4 d1qx2a\_ d1ig5a\_ d2y5ia\_ d1qlsa\_  
d1psra\_ d3n22a\_ d2egda\_ d4ggfc\_ d2wcea\_ d2luca\_ d4aqia\_ d3nsia\_  
d2lp3a\_ d1j55a\_ d1a4pa\_ d1k8ua\_ d1pvaa\_ d3fs7a\_ d2pvba\_ d1ttxa\_  
d2kyfa\_ d1rk9a\_ d1a75a\_ d1exra\_ d1tiza1 d1nyaa\_ d1g8ia\_ d1ggwa\_  
d1wdcc\_ d3fwba\_ d1ggza\_ d2o5ga\_ d1ctaa\_ d1m45a\_ d3i5gc\_ d1sl8a\_  
d1fpwa\_ d2scpa\_ d2roaa\_ d4aqra\_ d3pn7b\_ d1br1b\_ d1s6ca\_ d1bjfa\_  
d2obha\_ d1jfka\_ d1jf0a\_ d1qv0a\_ d1lkja\_ d2mlfc\_ d2m97a\_ d2d8na\_  
d4by5a\_ d1jbaa\_ d4nqga\_ d1wdcb\_ d2mysc\_ d1j7qa\_ d1s6ia\_ d1uhka2  
d1r2ua\_ d1dtla\_ d3kf9a\_ d3pn7c\_ d5d67d\_ d1tuza\_ d1h8ba\_ d1eg3a1  
d2zkmx1 d1snla\_ d1gjya\_ d1y1xa\_ d1dvia\_ d1df0a1 d1qxp2a\_ d4usla\_  
d1k94a\_ d1sfsa\_ d1wkya2 d1uuqa\_ d3wh9a\_ d4m1ra\_ d1xyza\_ d4xuya\_  
d2je8a5 d4bf7a1 d3cuia\_ d1ur4a\_ d1qw9a2 d1odza\_ d2vzsa5 d1bqca\_  
d2x2ya1 d1hjqa\_ d1qnra\_ d4y7ea1 d1vjza\_ d4k68a\_ d2v3ga\_ d4hpga\_  
d1nq6a\_ d1h4pa\_ d1aq0a\_ d3ziza\_ d4bs0a\_ d1ecea\_ d1h1na\_ d1ta3b\_  
d1w91a2 d1i1wa\_ d1uhva2 d1us3a2 d1legza\_ d7a3ha\_ d1tvna1 d3nyda1  
d1ghsa\_ d2cyga1 d4xv0a\_ d2c8na2 d1w32a\_ d3emca\_ d1v6ya1 d1foba\_  
d2uwfa1 d2fgla\_ d3niya1 d2c0ha1 d1rh9a1 d1yq2a5 d1szna2 d1fa2a\_  
d1pama4 d5do8a1 d1ea9c3 d1hx0a2 d2fhfa5 d1qhoa4 d1avaa2 d1m53a2  
d4m8ua1 d2gjpa2 d1lwha2 d4howa1 d1ktba2 d1j0ha3 d3vm5a1 d2x1ia\_  
d1wzaa2 d1uasa2 d2diea1 d1mxga2 d1ht6a2 d1eswa\_ d1iv8a2 d5cpsa\_  
d1ud2a2 d1zjaa1 d3gbea1 d1kwga2 d1wdpa\_ d1gcya2 d1g5aa2 d1hvxa2  
d3dhp2a2 d2bhua3 d4do4a1 d3qgva1 d1e43a2 d1g94a2 d2d3na2 d1gjwa2  
d1gvia3 d1x1na1 d1r7aa2 d1tz7a1 d2x42a1 d1tr9a1 d3abza1 d4toqa\_  
d1wb0a1 d1w9pa1 d1eoka\_ d1litxa1 d1goia2 d1ledqa2 d2gsja\_ d1hjxa1  
d1jnda1 d1vf8a1 d3wdpp1 d3wq5a\_ d1gnxa\_ d4gxpa\_ d4hz8a\_ d1e4mm\_  
d3aiua\_ d1wcga1 d1qvba\_ d3ahxa\_ d1v02a\_ d2dgaa\_ d1pbga\_ d1vffa1  
d1qoxa\_ d4ha4a\_ d1mixa2 d1e5wa2 d1j19a2 d1isna2 d2a16b2 d3syxa1  
d1mkea1 d2p8va\_ d1xoda1 d1evha\_ d1qc6a\_ d1legxa\_ d2hmta\_ d1lssa\_  
d1b9ra\_ d1offa\_ d1frra\_ d3wcqa\_ d1e9ma\_ d1l5pa\_ d1wria\_ d1i7ha\_  
d3av8a\_ d1czpa\_ d1rfka\_ d3p1ma1 d3b2ga\_ d2bt6a2 d1wgqa1 d1v89a1

d2coda1 d1zc3b\_ d1wg7a1 d1u5ea1 d1v61a1 d2coca1 d2ys1a1 d1v5pa1  
d1ntya2 d1wjma1 d1wila1 d1u29a\_ d1xx0a1 d1unqa\_ d2zkmx3 d1fhoa\_  
d1v88a1 d2adza1 d1x1fa1 d1p6sa\_ d2coaa1 d1btka\_ d1v5ma1 d1faoa\_  
d2x18a\_ d1dyna\_ d1x1ga1 d4kaxb\_ d2j59m1 d1xcga2 d1txda2 d1u5da1  
d1dbha2 d1wlha\_ d1upqa\_ d1v5ua1 d1foea2 d2fjla1 d1lea\_ d2dfka2  
d2cofa1 d1kz7a2 d1h6ua1 d9ldta1 d2ewda3 d1up7a1 d2dfda1 d1s6ya1  
d1vjta1 d7mdha1 d1hyea1 d1t2da1 d1ojsa3 d1b8pa1 d1hyha1 d1civa1  
d2a92a1 d1ez4a1 d1i0za1 d1y6ja1 d1gv0a1 d1ur5a1 d1ll1da1 d1obba1  
d1v8ba1 d1gdha1 d1l7da1 d2dlda1 d1mx3a1 d1ygya1 d1qp8a1 d1li4a1  
d1j4aa1 d2naca1 d1npya1 d3t4ea2 d1a4ia1 d1o0sa1 d2hk9a2 d2egga2  
d1b26a1 d1bvua1 d1gq2a1 d1c1da1 d1leha1 d1gtma1 d1leuza1 d3dona2  
d1edza1 d1gpja2 d1vi2a1 d1p77a1 d1nyta1 d1b0aa1 d1vl6a1 d1v9la1  
d1txga2 d3f47a1 d2pv7a2 d1xc2a3 d2ahra2 d4xiya1 d2f1ka2 d1pgja2  
d1i36a2 d1np3a2 d1lj8a4 d1teaa3 d1qmg2 d2i76a2 d2g5ca2 d1wdka3  
d1dlja2 d3cuma3 d1kola2 d1f8fa2 d1qora2 d1jqba2 d1vj0a2 d1cdoa2  
d1gu7a2 d1d1ta2 d1xa0a2 d2dm6a2 d1jvba2 d1rjwa2 d1llua2 d1tt7a2  
d1piwa2 d1o89a2 d1iz0a2 d1e3ja2 d1yb5a2 d1uufa2 d1vj1a2 d1e3ia2  
d3gpdg1 d1vc2a1 d2nvwa1 d1u8fo1 d1ydw1 d1hdgo1 d2g17a1 d1cf2o1  
d2czca2 d1r0ka2 d1obfo1 d2cvoa1 d1ebfa1 d1h6da1 d1i32a1 d1zh8a1  
d2q49a1 d1qkia1 d1j5pa4 d3pzra1 d1xeea1 d1vkoa1 d1vm6a3 d3qvsal  
d2pkqo1 d1b7go1 d1gr0a1 d1p1ja1 d1lc0a1 d1j0xo1 d3pwka1 d2hjsa1  
d1zyao1 d1vkna1 d1tlt1a1 d1nvmb1 d3sjua\_ d3ojfa1 d1xu9a1 d2jjya1  
d1n7ha\_ d1ylpa1 d1h5qa\_ d1jtva\_ d4fs3a\_ d2bkaa1 d1gy8a\_ d2c5aa1  
d1ulsa\_ d1ooea\_ d2b69a1 d1y5ma1 d1spxa\_ d1aela\_ d1bxka\_ d1ydea1  
d1gega\_ d1hdoa\_ d1o5ia\_ d1e6ua\_ d1snya1 d2rhca\_ d3zv4a\_ d5ceja\_  
d2d1ya1 d3w8ea\_ d2fmua1 d1x1ta\_ d1rpna\_ d3ay7a1 d1k2wa\_ d1eq2a\_  
d2hrba1 d3ruaa\_ d2ew8a1 d4hwka\_ d1xgka\_ d2bd0a1 d1yo6a1 d2a35a1  
d2ntva\_ d1vl8a\_ d1hdca\_ d4bkua\_ d2ag5a1 d2q45a\_ d1nffa\_ d4iy1a\_  
d1zbqa1 d1kewa\_ d1ek6a\_ d1ja9a\_ d2q46a2 d1iy8a\_ d1cyda\_ d2ptga\_  
d1hxha\_ d1uzma1 d3lyla\_ d4m89a\_ d3wyea\_ d2blla1 d1w6ua\_ d1sb8a\_  
d2q2va\_ d4nr0a\_ d1e6wa\_ d2gasa\_ d3oiga1 d2bgka1 d1mxha\_ d1vl0a1  
d1rkxa\_ d1r6da\_ d1wmaa1 d1e7wa\_ d2c07a1 d1xkqa\_ d3tzha\_ d1g0oa\_  
d3lz6a\_ d1qyca\_ d1ledoa\_ d1gz6a\_ d1oc2a\_ d1t2aa\_ d1zema1 d2xoxa\_  
d1z45a2 d1geea\_ d1p33a\_ d3lt0a\_ d4e6pa\_ d2wyua\_ d1db3a\_ d4q9na\_  
d1xhla\_ d4o1ma\_ d1fmca\_ d2uvda\_ d2gdza1 d1uaya\_ d2z1ma\_ d2o23a2  
d2fr1a2 d2fr1a1 d1qsga\_ d1qyda\_ d4zjua\_ d2a4ka1 d1yb1a\_ d1wvga1  
d1yxma1 d3f4ba\_ d1mg5a\_ d1xg5a1 d1r55a1 d3gboa\_ d1atla\_ d1buda\_  
d4q1la\_ d1quaa\_ d1yp1a\_ d1wnia\_ d2gfoa1 d1vjva\_ d2ayna1 d3nhea\_  
d3nqyb\_ d4gera\_ d1bqba\_ d4c5pa\_ d2bsza1 d4bgfa\_ d1w4ta1 d1g0da4  
d2f4ma1 d1x3za\_ d1t3ca\_ d2a97a\_ d3fiea\_ g1e1h.1 d3ioqa\_ d1fh0a\_  
d1o0ea\_ d1khqa\_ d1m6da\_ d2cb5a\_ d1cs8a\_ g8pch.1 d1s4va\_ d2pnsa\_  
d1vsna1 d1mira\_ d1iwda\_ d2oula\_ d7pcka\_ d3bwka\_ d3bcna\_ d2p86a\_  
d1pvja\_ d1pcia\_ d1gece\_ d1deua\_ d4bs6a\_ d1xkga1 d1cqda\_ d1jqpa2  
d2c0ya\_ d2bdza\_ d3p5ua\_ d1ex4a2 d1c6va\_ d2jk6a2 d2jk6a1 d1fecal

d1feca2 d1lpfa1 d1lpfa2 d1xhca1 d1xhca2 d1dxla2 d1dxla1 d1gera2  
d1m6ia2 d1onfa2 d3lada2 d3lada1 d1w4xa1 d1w4xa2 d1gesa2 d1mo9a1  
d1xdia1 d1fl2a2 d1fl2a1 d1fcda1 d1fcda2 d1h6va2 d1h6va1 d1mo9a2  
d1gv4a2 d1gv4a1 d2gv8a2 d2gv8a1 d1aoga1 d1aoga2 d1hyua1 d1ebda1  
d1ebda2 d3dk9a1 d1q1ra2 d1q1ra1 d1gesa1 d1pv8a\_ d1w5qa\_ d2c1ha\_  
d1l6sa\_ d1zbf1a1 d2z1ha\_ d2etja1 d3qioa1 d1j11a\_ d2e41a\_ d1j12a\_  
d21sna1 d1lio2a\_ d1uaxa\_ d2yv0x\_ d1mu2a1 d1lekea\_ d1i39a\_ d1pn0a1  
d1reoal d1ju2a1 d2f5va1 d3c96a1 d2gmha1 d1pj5a2 d1gpea1 d1o5wa1  
d1n4wa1 d1k0ia1 d2dw4a2 d2ivda1 d2voua1 d1kdga1 d1s5ja1 d2hbja2  
d2igia\_ d1wlja\_ d1qhta1 d4dleal d1tgoa1 d2f96a1 d3tr8a1 d3mxma\_  
d1q8ia1 d1y97a1 d1w0ha\_ d1kfsa1 d2py5a1 d1noya\_ d1d5aa1 d1yt3a3  
d2guia\_ d3mwpal d4kb1a\_ d1iuka\_ d2csua1 d3q9ub\_ d2yv1a1 d3q9na\_  
d2d59a\_ d1oi7a1 d2yv2a1 d1euca1 d1y81a1 d1r7ha\_ d1faaa\_ d1wika1  
d1xfla\_ d1ttza1 d2f51a1 d1ti3a\_ d1nhoa\_ d1sena\_ d2i4aa\_ d1ep7a\_  
d1zmaa1 d1fo5a\_ d3lefa1 d3diea1 d2yana1 d1z6na1 d1oaza\_ d3zywa1  
d4aj8a\_ d1nm3a1 d4fiwa\_ d1wmja\_ d4hs1a1 d1iloa\_ d1xwaa1 d1wjka1  
d2vm1a\_ d1fb6a\_ d1gh2a\_ d1h75a\_ d1nw2a\_ d1kx5b\_ d3a6na\_ d4m6ba2  
d2nqbd\_ d3wkjd\_ d2yfwe\_ d4h9na\_ d5bnxa\_ d1kx5c\_ d3r45a\_ d1eqzb\_  
d4jjnb\_ d1f66c\_ d1eqza\_ d4wnnb\_ d1kx5a\_ d1u35c1 d1id3a\_ d2nqbc\_  
d1kx5d\_ d1tafa\_ d1bh9b\_ d1tafb\_ d1jfib\_ d1q9ca\_ d1h3ob\_ d2byka1  
d1n1ja\_ d4g92b\_ d1jfia\_ d1h3oa\_ d2bykb1 d1n1jb\_ d1pd212 d1nhya2  
d2a2ra2 d1k0dd2 d1f2ea2 d1gsua2 d1f3ba2 d2fhea2 d2pvqa1 d1tw9a2  
d1oyja2 d1e6ba2 d3ik7a1 d4is0a1 d1r5aa2 d1jlva2 d1m0ua2 d3gtub2  
d1z9ha2 d1okta2 d1axda2 d2gsra2 d1tu7a2 d1k3ya2 d1zgma1 d1b48a2  
d1gnwa2 d1gwca2 d2gsta2 d1glqa2 d1oe8a2 d1pn9a2 d1v2aa2 d1fw1a2  
d1duga2 d1a0rp\_ d1ig8a1 d1czan2 d1czan3 d1czan1 d1ig8a2 d1czan4  
d1bg3a3 d1bg3a2 d1bg3a1 d4ilya\_ d4olta\_ d1qgia\_ d1sefa\_ d1sfna\_  
d1rc6a\_ d1qqya\_ d1gd6a\_ d1f6ra\_ d2gv0a\_ d1iiza\_ d2z2fa\_ d1j8xa\_  
d1ghla\_ d1b9oa\_ d1741a\_ d1691a\_ d2o4wa\_ d1p37a\_ d1k28a3 d1xjta1  
d1jtma\_ d2f2qa\_ d4e97a1 d1g4ma1 d1g4ma2 d3w3ea\_ d4tx7a\_ d3cq1a\_  
d4msta\_ d3iwra\_ d1dxja\_ d2z37a\_ d4dyga\_ d1mpya2 d1kw3b2 d1kw3b1  
d4ghga1 d1tfza1 d3isqa1 d3isqa2 d1sqia1 d1sqia2 d1lkda2 d1lkda1  
d1mpya1 d1cjxa2 d1cjxa1 d1sp9b2 d1t47a1 d1t47a2 d1flua2 d1sp8a1  
d1sp8a2 d1flua1 d1etob\_ d1umqa\_ d1g2ha\_ d1iyka2 d1iyka1 d1rxta1  
d1iica1 d1qsta\_ d2beia1 d4m3sa\_ d1u6ma1 d1ygha\_ d1yk3a1 d3dr6a\_  
d1xmta\_ d1z4ea1 d2ge3a1 d1bo4a\_ d2fiaa1 d2jdca1 d1y9wa1 d3to7a\_  
d1wwza1 d2fl4a1 d2ozua1 d2b5ga\_ d2cy2a1 d2p0wa\_ d1cm0a\_ d4pswa\_  
d1yrea1 d1yr0a1 d1m4ia\_ d2gana1 d1yvka1 d1ghea\_ d2g3aa1 d1y7ra1  
d2eua1 d1q2ya\_ d2fsra1 d1xeba\_ d2ae6a1 d1cjwa\_ d1qsm1a\_ d2aj6a1  
d1y9ka1 d1i12a\_ d1vkca\_ d2atra1 d1n71a\_ d2d4pa1 d2fiwa1 d2fe7a1  
d1tiqa1 d2ou2a\_ d1yx0a1 d2fcka1 d1p0ha\_ d2j8ma\_ d2pq8a\_ d1z4ra1  
d1s3za1 d1ufha\_ d1ax4a\_ d1c7ga\_ d2v1pa1 d2ez1a\_ d1dosa\_ d3qm3a1  
d2fjka\_ d1xvqa1 d1pn0a2 d3hy2a\_ d2cvba1 d1o8xa\_ d1we0a1 d2bmx1a1  
d2a4va1 d1psqa\_ d1xiya1 d1q98a\_ d1n8ja\_ d1zofa1 d2ggta\_ d3tjja\_

d4je1a1 d1o73a\_ d3s9fa\_ d2zcta\_ d1qmva\_ d1jfua\_ d2b1ka\_ d5dvba1  
d2b5xa1 d2v2ga\_ d1st9a\_ d3tb2a\_ d4llra\_ d4fh8a1 d1e2ya\_ d1knga\_  
d2h30a\_ d1i5ga\_ d2z9sa\_ d2f8aa1 d1tp9a1 d2b7ka\_ d1nm3a2 d3hvva\_  
d2wfc1 d4kcea\_ d1xvwa1 d4gqca1 d3qpma\_ d4k1fa\_ d1zzoa1 d1gp1a\_  
d1prxa\_ d1zsq1 d1rmka\_ d1ixta\_ d1cna\_ d1fu3a\_ d1glpa\_ d1f3ka\_  
d1fyga\_ d2m5ta\_ d1cqqa\_ d1wqsa\_ d5bpea\_ d2ipha\_ d1lvoa\_ d2bhga1  
d3tnta\_ d3sjia\_ d3d23a1 d2fyqa\_ d3tloa\_ d3zvea1 d3q3ya1 d4asha1  
d1jgta2 d1ofda3 d1ea0a3 d1ecfa2 d1q15a2 d1ct9a2 d1te5a\_ d1ysl1x\_  
d4hs9a\_ d1ispa\_ d1ex9a\_ d3qmma\_ d1ra6a\_ d1muka\_ d3gsza\_ d1khva\_  
d1te9a\_ d2xwha\_ d3uqsa\_ d3hkwa\_ d3n6ma\_ d2cjqa\_ d2xyma\_ d1teba\_  
d1te8a\_ d1s48a\_ d1u09a1 d4wfxa\_ d3tyqa\_ d2pgga1 d4l3wa\_ d1llfa\_  
d1gz7a\_ d1lukca\_ d3groa\_ d1thta\_ d1ei9a\_ d2ftba\_ d1pmpa\_ d2rcqa1  
d1fdqa\_ d4lkpa\_ d1sa8a\_ d1vyfa\_ d1lpja\_ d3vg7a1 d4azqa1 d1o8va\_  
d5bvqa\_ d1p6pa\_ d2qo4a\_ d1opba\_ d1yiva1 d1o1va\_ d4bvma1 d4tkba\_  
d4i3ba\_ d1bwya\_ d1ftpa\_ d1ggla\_ d4gkca\_ d3p6da1 d1kqwa\_ d2a0aa1  
d3zxha\_ d1cgla\_ d1rm8a\_ d1leaka2 d1hy7a\_ d2jsda\_ d1cxva\_ d1hv5a\_  
d1i76a\_ d1gl2a\_ d3p0ya1 d1lgra1 d1lgra2 d1n8yc2 d1m6ba2 d1m6ba1  
d1sr9a2 d1rqba2 d1h6ua2 d1c8nc\_ d1x36a\_ d1smvc\_ d1ng0c\_ d4sbvc\_  
d1lopa\_ d1f2nc\_ d1cixa\_ d1y29a\_ d1v7fa\_ d2jtba\_ d1d1ha\_ d1g9pa\_  
d1lupa\_ d1qk7a\_ d1mb6a\_ d2a2va\_ d1niya\_ d1i25a\_ d1hwva\_ d2mpqa\_  
d1ie6a\_ d1kqha\_ d1la4a\_ d2mxoa1 d1d10a\_ d1koza\_ d1qk6a\_ d1emxa\_  
d1lqra\_ d1c6wa\_ d1js9c\_ d1za7a\_ d1laja\_ d1rypd\_ d1lrua\_ d1rypc\_  
d3unfk\_ d1rypa\_ d1j2pa\_ d1lru1\_ d1j2qh\_ d3unfh\_ d1m4ya\_ d1rypb\_  
d1lru1\_ d1lru2\_ d1q5rh\_ d1rypg\_ d1g3ka\_ d1lru1\_ d1lru2\_ d1q5qa\_  
d1e94a\_ d1lru1\_ d1ryph\_ d3ty6a\_ d1lru1\_ d1lru2\_ d1rype\_ d1lru1\_  
d1lru1\_ d3mi01\_ d1rypf\_ d2z3ba\_ d1lru1\_ d3mka2\_ d1lru1\_ g1gk9.1  
g1or0.1 g1e3a.1 d1mqta\_ d1d4m3\_ d1fmd3\_ d2mev1\_ g1aym.1 d1ev13\_  
d4q4w1\_ d1r1a3\_ d2x5ia\_ d1rhi1\_ g1r1a.1 g1d4m.1 g1rhi.1 d1b35b\_  
d1lopa\_ d1tme1\_ d4iv1a\_ g1pvc.1 g1fpn.1 d1fpn1\_ d4gb31\_ d1d4m1\_  
d1fmd1\_ d1ev11\_ d2wzr3\_ g1cov.1 d1qqp3\_ g1fmd.1 d2x5ic\_ d1rhi3\_  
g1oop.1 d1hxs1\_ d1fpn3\_ d1bev1\_ g2mev.1 d1eah3\_ d1aym1\_ d1pvc3\_  
d1qqp1\_ d1zba3\_ d1h8ta\_ d3vbhc\_ g1b35.1 g1bev.1 d1hxs3\_ g1ev1.1  
d1bev3\_ g1tmf.1 d1tmf1\_ d1b35a\_ d2mev3\_ g1eah.1 g1h8t.1 d1eah1\_  
d4q4w3\_ d1r1a1\_ d1aym3\_ d1pvc1\_ d1zba1\_ d1h8tc\_ d1loopc\_ d1tme3\_  
g1qqp.1 d4iv1c\_ g1tme.1 d3ubub\_ d1legia\_ d1qo3c\_ d1v7pa\_ d1tdqb\_  
d3ubua\_ d1c3ab\_ d1h8ua\_ d3bx4b\_ d1t8ca1 d1sb2a1 d1qdda\_ d2ziba1  
d3cada\_ d1j34b\_ d1jwia\_ d1jzna\_ d1c3aa\_ d1oz7b\_ d1wmza\_ d3bdwb\_  
d1hq8a\_ d1fifa1 d1dv8a\_ d3hupa\_ d1wk1a1 d1umra\_ d2afpa\_ d3bx4a\_  
d1gz2a\_ d1s16a\_ d1v7pb\_ d3g8ka\_ d1ixxa\_ d1j34a\_ d1jwib\_ d1g1sa1  
d1y17a1 d1ja3a\_ d1fvub\_ d3bdwa\_ d1sb2b1 d1fvua\_ d1umrc\_ d1oz7a\_  
d4m17a\_ d3cfwa1 d1ypqa1 d1gl1ta1 d3fd4a\_ d3l9jc\_ d4dn8a1 d1v4lb\_  
d1rd11\_ d2msba\_ d1eixa\_ d3exra\_ d2ffca1 d2fda1 d3n3ma1 d2czda\_  
d1q6oa\_ d2yyua\_ d1vqta1 d1dbta\_ d3ldva1 d1rw1a\_ d1z3ea1 d3l78a\_  
d4lt9a1 d3tc7a1 d3hoja\_ d1i4na\_ d3vnda\_ d3n18a1 d1geqa\_ d3nava1

d1v5xa\_ d4a2ra1 d3tc6a1 d1ujpa\_ d4ijba\_ d1xcfa\_ d1vc4a\_ d1rd5a\_  
d1qopa\_ d3b5va\_ d2r80b\_ d1cqxa1 d1gcvb\_ d3boma\_ d2h8fb\_ d2raoa\_  
d3bj1a\_ d4hrrb\_ d2r50a\_ d3d1kb\_ d2aa1b1 d3zhwa\_ d3hf4b\_ d3gdja\_  
d1jebb\_ d3bj1b\_ d1x9fb\_ d1wmub\_ d1gcva\_ d3bcqb\_ d3d4xb\_ d1gvha1  
d2dc3a\_ d3hf4a\_ d4yu3a\_ d3k8ba\_ d1qpwb\_ d2r80a\_ d3bcqa\_ d1v4wa\_  
d3wtgb\_ d1j17a\_ d4esaa\_ d1a9we\_ d3d1ab\_ d1fsla\_ d4h21a\_ d1v4wb\_  
d1mwca\_ d1vhba\_ d1jeba\_ d1spgb\_ d1h97a\_ d1q1fa\_ d1tu9a1 d3d1aa\_  
d1hdsb\_ d3hyub\_ d2zfb\_ d3fs4a\_ d1oj6a\_ d1shrb\_ d4h21b\_ d4yu3b\_  
d1spga\_ d3hrwa\_ d3qqra\_ d3at5a\_ d4wchd\_ d3hyua\_ d1cg5b\_ d1uc3a\_  
d1hbra\_ d2raob\_ d1outb\_ d4esab\_ d3gdjb\_ d3qqqa\_ d1x9fc\_ d3vrfb\_  
d1litha\_ d3mkba\_ d3d4xa\_ d3mjpa\_ d1j16a\_ d3fh9a\_ d1outa\_ d2dc3b\_  
d1lit2a\_ d3eoka\_ d3g46a\_ d1qpwa\_ d3vrfb\_ d1ch4a\_ d1x9fd\_ d1hdsa\_  
d2zfb\_ d3mkbb\_ d1or4a\_ d3wtga\_ d1a4fa\_ d3fh9b\_ d3bomb\_ d3cy5a\_  
d3at5b\_ d1x9fa\_ d2oifa\_ d4lmxb\_ d1cpcb\_ d3v57a\_ d1kn1a\_ d1cpca\_  
d4f0ta\_ d2vjha\_ d4po5b\_ d1eyxa\_ d1alla\_ d4f0tb\_ d1b33b\_ d1b8db\_  
d4h0mb\_ d2vjhb\_ d4l6b\_ d2vmlb\_ d1allb\_ d2vjta\_ d3dbja\_ d2vmla\_  
d2vjtb\_ d4f0ub\_ d1f99b\_ d4rmpa1 d1liaa\_ d1eyxb\_ d2uulb\_ d4lmsb\_  
d4f0ua\_ d2bv8a\_ d1f99a\_ d2bv8b\_ d2c71b\_ d3dbjb\_ d4rmpb1 d1b8da\_  
d4h0ma\_ d3v57b\_ d1kn1b\_ d1liab\_ d2uula\_ d2j96a\_ d3ia2a\_ d1a88a\_  
d4dgqa1 d1hkha\_ d1zoia\_ g1gxs.1 d1azwa\_ d1mtza\_ d1hlga\_ d2xqfa\_  
d1ea5a\_ d1f6wa\_ d1dx4a\_ d1qe3a\_ d1k4ya\_ d4qwwa\_ d2ha2a\_ d1sfra\_  
d1f0na\_ d4qeka\_ d3c8da2 d2pbla1 d1jkma\_ d1jjia\_ d1lzl\_ d1jjfa\_  
d2qvba\_ d2v9za\_ d4kafa1 d4iuua3 d4bvva\_ d5hpga\_ d3k65a\_ d1ki0a3  
d1ki0a2 d1ki0a1 d1a0ha1 d3sp8a3 d2feba1 d1xova2 d1f74a\_ d3l21a\_  
d2elda\_ d1to3a1 d1w3ia\_ d1sfla\_ d1n7ka\_ d1vcva1 d4ime\_ d1wa3a\_  
d2ocza1 d1f2ja\_ d3m16a\_ d2yxga\_ d1ub3a\_ d3a5fa\_ d1fbaa\_ d1l6wa\_  
d1xfba1 d1wx0a1 d1vpxa1 d1ojxa\_ d1mxsa\_ d2a4aa1 d1xkya1 d3cq0a1  
d3s1xa\_ d1f05a\_ d1fdja\_ d3cpa1 d4d2ja\_ d1cg2a1 d1yloa2 d1y7ea2  
d1y0ya3 d1lfwa1 d1vixa1 d1vhoa2 d1ysja1 d1vhea2 d1z21a1 d2fvga2  
d1vgya1 d1r3na1 d2grea2 d1xmba1 g1q71.1 d1rtqa\_ d3rp2a\_ glucy.1  
d1fuja\_ d2zchp\_ d3w94a\_ d1si5h\_ d1l06a\_ g2pka.1 d1cgha\_ d1kigh\_  
d1a5ia\_ d3s9ba\_ d1hj8a\_ d1ao5a\_ d2anya\_ d1q3xa1 d1gvza\_ d1azza\_  
d4gsoa\_ d2f91a1 d1liau\_ d1gdna\_ d1eufa\_ g1fiw.1 d1eq9a\_ d4nfea\_  
d2rdla\_ d1spja\_ d1elva1 d1a7sa\_ d1ekbb\_ d1pfx\_ d1yc0a\_ d2aiqa\_  
g1fiz.1 d1fi8a\_ d4k60a\_ d4dgja\_ d1mzaa\_ d1op0a\_ d3tjva\_ d1pytd\_  
d1sgfg\_ g1gg6.1 d2eeka\_ g1rtf.1 d1a0ja\_ d3g01a\_ d1pytc\_ d4e7na\_  
d1ddja\_ d1z8ga1 d2hlca\_ d1npma\_ d1brup\_ g1jou.1 d1sgfa\_ d1autc\_  
g2hnt.1 g1kdq.1 d1orfa\_ d3s69a\_ d4crga\_ d1fxya\_ d1bqya\_ d1svpa\_  
d1mbma\_ d3su6a1 d4agka\_ d1vcpa\_ d1q31a\_ g1n11.1 d3e90b\_ d1ep5a\_  
d3u1jb\_ d1dzka\_ d4tlja\_ d2a2ua\_ d4wfva\_ d3t1da\_ d4iixa\_ d3zq3a\_  
d2nnda\_ d1i4ua\_ d1kxo\_ d1bbpa\_ d1kt7a\_ d1exsa\_ d3s26a1 d1lf7a\_  
d1qfta\_ d4gh7a\_ d1z24a1 d1qabe\_ d1xkia\_ d1ew3a\_ d3bx7a\_ d4iawa1  
d1n0sa\_ d1gkab\_ d3kzaa\_ d2k23a\_ d2l9ca1 d2joza1 d1gm6a\_ d3kffa\_  
d3saoa1 d1e5pa\_ d1yupa1 d1iiua\_ d3lgia\_ d3i77a\_ d2z9ia2 d4nsva\_

d1lcya2 d4jcna\_ d1agja\_ d1hpga\_ d1p3ca\_ d1l1ja\_ d1qtfa\_ d1e69a\_  
d1mv5a\_ d3g60a4 glii8.1 d1ewqa2 d1ji0a\_ d1qhla\_ d1v43a3 d2wmfa1  
d1vpla\_ d1g2912 d4a82a2 g1f2t.1 d2d62a1 d3tuic1 d2bbsa1 d3g60a3  
d2ixea\_ d1g6ha\_ d1sgwa1 d2qi9c\_ d3rlfa1 d3b60a1 d3d31a2 d2pzea1  
g1xew.1 d1oxxk2 d2onka1 d1wlwa\_ d1iwea\_ d1qf5a\_ d1vmaa2 d1nija1  
d1np6a\_ d2p67a1 d3ihla\_ d1okkd2 d1ls1a2 d1s1ma2 d1liona\_ d2v40a\_  
d1dj3a\_ d3hida\_ d2vola1 d2g0ta1 d1vcoa2 d1j8mf2 d1xjca\_ d1p9ba\_  
d1qzxa3 d1ihua2 d1ihua1 d2qm8a\_ d1dj2a\_ d4ioja\_ d1cp2a\_ d1yrba2  
d1hyqa\_ d2i49a\_ d1nnfa\_ d1xvxa\_ d1ursa\_ d1h3da1 d1iuda\_ d4m1va1  
d1twya\_ d3e13x\_ d2nxoa1 d4pfua\_ d3ttma\_ d1elja\_ d2qmw1 d1us5a\_  
d1y3na1 d1jeta\_ d1uqwa\_ d4f19a1 d2esna2 d3thia\_ d3fasa1 d2uyeb\_  
d2xwva1 d1r91a\_ d2fyia1 d1pb7a\_ d2ozza1 d1sw5a\_ d1vr5a1 d2g29a\_  
d1xs5a\_ d3lswa\_ d2z23a\_ d3w9va\_ d3tcha\_ d1q35a\_ d1z7me1 d3q27a\_  
d1p99a\_ d1ve4a1 d2i6ea1 d4mcoa1 d4n8ya\_ d1eu8a\_ d1zbma1 d1hsla\_  
d1ixca2 d1j1na\_ d1xvya\_ d1y9ua\_ d2z22a1 d1xoca1 d4oera\_ d1wdna\_  
d5f1qa1 d1xt8a1 d1i6aa\_ d4gwoa\_ d4igta1 d1pc3a\_ d4mmpa1 d1o63a\_  
d2czla1 d2onsa2 d4mija1 d1eh3a\_ d3skpa\_ d1dtza1 d1dtza2 d1ieja\_  
d1jnfa2 d1ce2a1 d1jnf1a1 d1b1xa2 d1b1xa1 d1jw1a1 d1jw1a2 d1ryoa\_  
d1h76a1 d1h76a2 d1etha2 d1w52x1 d2ppla1 d1hpla2 d2oxea1 d1bu8a2  
d1rpla2 d1c4oa1 d2p6ra3 d2p6ra4 d1oywa2 d1oywa3 d1wrba1 d1w36b2  
d1w36b1 d1c4oa2 d3bora\_ d1t6na\_ d2eyqa5 d2eyqa3 d2eyqa2 d2zu6a2  
d1veca\_ d1w36d1 d2g9na1 d1z3ix2 d2rb4a\_ d1hv8a1 d1hv8a2 d1t5ia\_  
d1w36c2 d2j0sa2 d2j0sa1 d1fuka\_ d3hjha1 d1z5za1 d1qdea\_ d1z63a1  
d1s2ma2 d1s2ma1 d1wp9a1 d1wp9a2 d1gm5a3 d1gm5a4 d3dina4 d3dina3  
d1q0ua\_ d1w36c1 d1z3ix1 d1nkta3 d1nkta4 d1uaaa2 d1w36d2 g1qhh.1  
d2fwra2 d2fwra1 d3q3ma\_ d1za0a1 d2inca\_ d1jk0a\_ d2incb\_ d1mhyb\_  
d3hf1b\_ d1mtyb\_ d1r2fa\_ d2uw1a\_ d1mhyd\_ d3n37a\_ d1afra\_ d1oquc\_  
d1syya\_ d1mtyd\_ d2o1za\_ d1uzra\_ d1smsa\_ d2fkza\_ d1zuj1a1 d1s3qa1  
d2fjca1 d1z6om1 d1veia\_ d4dyya\_ d1jiga\_ d3gvya\_ d2pyba\_ d4cy9a1  
d3bvfa1 d1r03a\_ d2cf7a\_ d1nf4a\_ d1zs3a1 d4iwka\_ d3ka8a\_ d3np0x\_  
d1n1qa\_ d1l1b3a\_ d4e6ka\_ d1z6oa1 d2fzfa1 d4dyua\_ d3ge4a\_ d1jgca\_  
d4am4a\_ d2z6ma\_ d1ji5a\_ d1vlga\_ d1lkoa1 d1krqa\_ d3qz3a\_ d1o9ra\_  
d2ffxj\_ d1euma\_ d1yv1a1 d2v2pa\_ d1j30a\_ d4di0a\_ d1dpsa\_ d1oewa\_  
d2qzxa\_ d2asia\_ d1psoe\_ d1miqa\_ d1smra\_ d2h6ta\_ d1pfza\_ d1lizda\_  
d3hd8a\_ d1j71a\_ d1dpja\_ d4aa9a\_ d1t6ex\_ g1b5f.1 g1lya.1 g1htr.1  
d1qdma2 d1bxoa\_ d1wkra\_ d1tzsa\_ d1libqa\_ d2qzwa\_ d1bdqa\_ d3ggta\_  
d3ixoa\_ d1mrxa\_ d2haha\_ d1tw7a\_ d4njsa\_ d1sgua\_ d2p3da\_ d1nsoa\_  
d3d3ta\_ d2rkfa\_ d1c6ya\_ d2rspa\_ d3ogpa\_ d3ekwa\_ d2o4na\_ d2j9ja\_  
d1baia\_ d3ggua\_ d3lzua\_ d4npua\_ d4j55a\_ d2r8na\_ d2fxda\_ d2p3ca\_  
d4dqea\_ d3ttpa\_ d3t3ca\_ d2p3aa\_ d2hc0a\_ d2fdda\_ d3mwsa\_ d1um8a\_  
d1ixza\_ d1qvra2 d1qvra3 d1qzma\_ d1sxjc2 d1jr3d2 d2p65a\_ d1l8qa2  
d1g8pa\_ d3hu3a3 d1sxjd2 d1njfa\_ d1in4a2 d1sxja2 d1tuea1 d2ce7a2  
d1w5sa2 d1sxjb2 d1d2na\_ d1ny5a2 d1ofha\_ d2gnoa2 d2a5yb3 d1fna2  
d1u0ja1 d1lv7a\_ d1iqpa2 d2fnaa2 d1ixsb2 d4gita\_ d1sxje2 d1g41a\_

d3ubra\_ d1qo8a1 d1d4ca1 d2k3va\_ d1ft5a\_ d1qdba\_ d1m1qa\_ d2j7aa\_  
d1h21a\_ d1ogyb\_ d4fasa\_ d1oaha\_ d1sp3a\_ d4lu0a\_ d3unda1 d3e9aa1  
d1vr6a2 d1n8fa\_ d2qkfa\_ d1d9ea\_ d1o60a\_ d2bcgg1 d2bcgg2 d1adqa1  
d1fnga1 d1uvqb1 d1zs8a1 d2vola1 d2vola2 d1mfb12 d2jelh2 d1uwe12  
d3qq4b1 d1kjbv\_ d1k5na1 d1osph2 d4odh12 d1ow0a1 d1ow0a2 d1bfob2  
d319ra2 d3jtth1 d2fath2 d4elkb2 d1fn4b2 d2xfxb\_ d1pg7x2 d1cqka\_  
d4k71b2 d1lk2a1 d1eapb2 d4lfhg2 d1i4fa1 d2nw2a2 d1kfah2 d1mhca1  
d1h3ua1 d1wejh2 d1h0db2 d1a5fh2 d1kcvh2 d1mjuh2 d1qqda1 d1kcrh2  
d1k8ia1 d3huja2 d2nnab1 d1nfd2 d3mffb2 d1s9va1 d1lk3h2 d1q0x12  
d1fv1b1 d1neza1 d4rfeb2 d1r3ha1 d1a6tb2 d1kjva1 d1pz5b2 d1onqa1  
d2bc4a2 d1de4a1 d1k8da1 d1tcra2 d1dn0b2 d1nfde2 d2xwtb2 d1bfoa2  
d1mexh2 d1iakb1 d1ypzf2 d4f7ea2 d1q7212 d2fbjh2 d1fe8h2 d1clzh2  
d1fngb1 d1uvqa1 d1vgka1 d1c16a1 d4j12a2 d4x99b2 d1igtb3 d1je6a1  
d1q72h2 d1nldh2 d1teth2 d2hmic2 d1i1ca2 d1i1ca1 d1k8ib1 d1q0yh2  
d1kfa12 d3frua1 d1pg7w2 d1u58a1 d1igyb4 d1igyb3 d1hyrc1 d1klub1  
d1deeb2 d1c12b2 d2bc4b2 d2ig2h2 d1kcv12 d3wn5b1 d1lk2b\_ d1lk312  
d1mjul2 d1sm3h2 d1q0xh2 d1zvs1 d1ydp1 d1u8ib2 d1ypze2 d1kcuh2  
d2e3fa\_ d1mm0a\_ d2e3ea\_ d2l1da\_ d2ny8x\_ d2e3ga\_ d2ny9x\_ d2nz3a\_  
d21j7a\_ d1n4na\_ d2m8bb1 d2kyqa\_ d3psma\_ d1jkza\_ d1jxca\_ d2g11a\_  
d4uj0a\_ d2k4ua\_ d1hp2a\_ d2lu9a\_ d1baha\_ d2meoa1 d1wm7a\_ d1hlya\_  
d1n8ma\_ d1jlza\_ d1wpda\_ d1c55a\_ d1pvza\_ d1wt7a\_ d1rjia\_ d1wz5a\_  
d1m2sa\_ d1pjva\_ d1c49a\_ d1qkya\_ d2ktca1 d1wmta\_ d1du9a\_ d1j5ja\_  
d1r1ga\_ d1t0za\_ d2i61a\_ d1t1ta\_ d1sn4a\_ d1kv0a\_ d21kba\_ d1npia\_  
d1wwna\_ d1pe4a\_ d2kbka\_ d2li7a\_ d1djta\_ d2kbha\_ d1dq7a\_ d1sega\_  
d1omya\_ d1zywa1 d1jzaa\_ d1iyjb4 d1iyjb5 d1iyjb3 d1o7ia\_ d4ipca1  
d1x3ea\_ d4apva\_ d1jb7a1 d1jb7a2 d1jb7a3 d3kdfa\_ d1ue1b\_ d1wjja1  
d3eiva\_ d1xjva2 d1xjva1 d2ccza2 d1se8a\_ d1lloc\_ d1jb7b\_ d1qvca\_  
d3ulla\_ d1qzga\_ d1miua4 d1miua5 d1miua3 d1y14b1 d2nn6i1 d1i941\_  
d2zjra2 d1smxa\_ d2qamc2 d1hh2p1 d2r7da1 d1rl2a2 d1wfga1 d3bzka4  
d1x6oa2 d3a0ja\_ d2j01d2 d2ja9a1 d4q15a\_ d1luza\_ d2n3sa\_ d2vnud1  
d1h95a\_ d1go3e1 d2nn6h1 d1ne3a\_ d2mola\_ d1iz6a2 d1jjga\_ d1e3pa2  
d2ix0a3 d2ix0a2 d2lxja\_ d1ueba3 d1ueba2 d2z0sa1 d1u0la1 d2ix0a1  
d2eifa2 d2je6i1 d3i2za1 d2c35b1 d2ahob2 d1t9ha1 d3i4oa\_ d2qall1  
d1jt8a\_ d2nn6g1 d1g6pa\_ d3cama\_ d1i94q\_ d1c9oa\_ d1d7qa\_ d2ba0a1  
d2vnud2 d2vnud3 d1khia2 d2qalq1 d1wi5a1 d1xta2 d1ny4a\_ d1pfsa\_  
d2a1ka\_ d1je5a\_ d2shpa1 d1yfoa\_ d1l8ka\_ d2ooqa1 d1g4us2 d1p15a\_  
d1lara2 d1lara1 d1wcha\_ d2fh7a2 d2fh7a1 d1ohea1 d1ohea2 d2f4da\_  
d1rxda\_ d2hxpa\_ d1xria\_ d1fpza\_ d3ezza\_ d4y2ea\_ d1i9sa\_ d1d4ua2  
d3azya\_ d3wvja\_ d1upsa1 d1ajoa\_ d2hyka\_ d1ajka\_ d2vy0a\_ d1o4ya\_  
d3o5sa\_ d3d6ea\_ d3atga\_ d1dypa\_ d1lumza\_ d3i4ia\_ d1c11a\_ d4lbqa\_  
d1a78a\_ d1slta\_ d4no4a\_ d3zsja\_ d3duia\_ d1g86a\_ d1qmja\_ d1hlca\_  
d1tdha3 d1q3ba3 d1ee8a3 d1k82a3 g1qmo.1 g1len.1 d3zyra\_ d1fnya\_  
d1n47a\_ g21tn.1 d1avba\_ d3usua\_ d1dhkb\_ d1f9ka\_ d1ukga\_ d1g8wa\_  
d1g9fa\_ d1wbf\_ d3wcsa\_ g1loe.1 d1mvqa\_ d1hq1a\_ d1v6ia\_ d1dbna\_



d1qnwa\_ d1fx5a\_ d4l8qa\_ d1ioaa\_ d3n35a\_ d3h33a\_ d1rwja\_ d19hca\_  
d1os6a\_ d3bxua\_ d3h4na\_ d1i77a\_ d3caoa\_ d2ctha\_ d1duwa\_ d1lofwa\_  
d2e84a\_ d1hh5a\_ d1gyoa\_ d3h34a\_ d1dszb\_ d1a6ya\_ d3c3bba\_ d1ynwa1  
d1r4ia\_ d1hcqa\_ d2hana\_ d2hanb\_ d2enva1 d1kb4b\_ d2n11b\_ d1lo1a\_  
d1cita\_ d2dara2 d2dara1 d1wyha2 d2dloa2 d1rutx4 d1rutx3 d2cuqa2  
d1x4la2 d1x4la1 d1x3ha2 d1x3ha1 d2d8za1 d1x61a2 d1x6aa1 d1x6aa2  
d2cora2 d2cora1 d1v6ga1 d1v6ga2 d2d8za2 d1x64a1 d1x64a2 d1b8ta1  
d2co8a1 d1x63a2 d2dj7a2 d2dj7a1 d2cu8a2 d2cu8a1 d1g47a2 d1g47a1  
d1j2oa1 d1wyha1 d2dloa1 d1wiga1 d1wiga2 d2cupa2 d2cupa3 d1x68a1  
d2d8ya2 d2d8ya1 d1m3va2 d1x62a1 d1x68a2 d1x61a1 d1b8ta3 d1b8ta2  
d2d8xa2 d2d8xa1 d1x4ka1 d1x4ka2 d2cuqa1 d1m3va1 d2co8a2 d1x63a1  
d2cura1 d2cura2 d1x62a2 d1op9a\_ d1y01a1 d1etzb1 d1egj11 d2gsib1  
d1nj9a1 d4jfhd1 d1aqk11 d1t2ja\_ d1lo4h1 d1zvya1 d3v4v11 d4enec1  
d1kxtb\_ d5e8ea1 d2pxya\_ d4weud\_ d1xiwc\_ d2esvd1 d1qznh\_ d1logae1  
d1f4xh1 d4n1hb\_ d3ezjb1 d3mlw11 d1kfah1 d1etza1 d1b4jh1 d3cfic\_  
d4w68a\_ d2arja1 d1ek3a\_ d2ok011 d1vera\_ d1uwgh1 d1blnb1 d1fpth1  
d1rzga1 d2giya1 d4m3kb1 d1nc2a1 d2nyyd1 d1ncna\_ d1fbih1 d5dxwa\_  
d4fqqa1 d1dqdh1 d1jfq11 d1kelh1 d1faih1 d1frgl1 d1figl1 d4m6n11  
d1fo0a\_ d4hxb11 d3b5ga\_ d3quyd1 d2h9gb1 d1i8kb\_ d2dd8h1 d2ck0h1  
d1eaja\_ d4w6wb1 d2a6ib3 d1t66d1 d2e27h\_ d1ob1b1 d1f11b1 d2v7na1  
d2xt1b1 d1pskh1 d4i13b1 d2op411 d1a0q11 d1uwel1 d1za3a1 d1ncb11  
d4uu9a\_ d1bm3h1 d1cloh1 d1nqba2 d1cf8h1 d4y5va\_ d1mhph1 d5anma1  
d4cdgc1 d4ldeb\_ d1y01b1 d2pcpb1 d1z3gl1 d1dfb11 d1fh5h1 d3g5xa1  
d1tzib1 d4dn311 d3zhka1 d2b1hh1 d2uyl1a1 d1f3dh1 d1nj9b1 d2agjh1  
d2h1p11 d1q72h1 d8fabbb1 d1ndmb1 d1rjca1 d4u6hb1 d3upca\_ d2fbj11  
d1osph1 d1tvda\_ d2cjev\_ d4fhbd1 d1bd2d1 d1rz7h1 d3nn8a\_ d1blna1  
d1knoa1 d1nfda1 d2bmkb1 d1dq11\_ d1igyb1 d1igf11 d12e8h1 d3utza1  
d1nc2b1 d1rihh1 d4mwfb1 d4jvpa1 d1mieh1 d1rhfa1 d1fgn11 d1sbsh1  
d1lp9e1 d1dn0a1 d4lqf11 d1iaih1 d1kgcd1 d1mh5b1 d1gpol1 d2g60h3  
d1f8t11 d2jixd1 d4grwh\_ d1fo0b\_ d1bfob1 d1axsa1 d1u9ka\_ d1nmbh\_  
d1h8na1 d1h8na2 d1jguh1 d4eura1 d3sdy11 d35c8h1 d1w7211 d1mvub\_  
d1i9rh1 d1ob1a1 d4wenb\_ d1yeeh1 d3ietc1 d1f58h1 d1ad0b1 d1mqk1\_  
d1nbvh1 d4b50a\_ d3r8bb\_ d1baf11 d1mamh1 d4rgne1 d2gsgb\_ d35c811  
d1bafh1 d1ai1h1 d2pcpa1 d2fath1 d2x1pa\_ d1orsb1 d1ibgl1 d1shma\_  
d1a2yb\_ d1u0qa\_ d2coqa\_ d1hilb1 d1qfwi\_ d1jv5b\_ d1fn4b1 d5e0qa\_  
d1nsnh1 d1plgl1 d4ocxl1 d1kb5h1 d1rzfh1 d1pg7x1 d2fx7h1 d2oi9c\_  
d1l7i11 d3eyva1 d1d5i11 d4ffyl\_ d1tet11 d1a6wh\_ d1lac6a\_ d3dvfa\_  
d1nfde1 d1mimh1 d1ri8a1 d1jhlh\_ d3dura\_ d1fskb1 d1f97a1 d3so3b1  
d2ak4d1 d1lp9f1 d4z7wf1 d1l7th1 d4y5ya\_ d4x7ec1 d1emth1 d1ikf11  
d1nlbh1 d4utal1 d1bjma1 d1eapb1 d1u6ah1 d2dtgd1 d1kj2b\_ d1xeda1  
d1cleh1 d1fgvh\_ d2bnub1 d2fb4h1 d2dtgb1 d1ktrh\_ d1jpth1 d1qkz11  
d4hepg\_ d2atpb1 d1flrh1 d2hrp11 d1mvfa\_ d1iaim1 d3k80a1 d2jb5h1  
d3zkxc\_ d4grwe\_ d1it9h1 d1rhhb1 d3w9ec\_ d1e4wh1 d1sy6h1 d2j6eh1  
d3qxta\_ d1jglh1 d1p7ka1 d1tzhb1 d4n8pa1 d1gaf11 d2jelh1 d1wioa2

d4i0cc1 d1cicb1 d1lmka2 d1lmka1 dliqwh1 dlorqb1 dlejoh1 d1jnlh1  
d4zg1a\_ d43c9b\_ d1ggbl1 d1wejh1 d3q6fa1 d1f3dj1 d3c6la1 d1bqlh1  
d3p9wb\_ d1a3r1l d1h0db1 d2uzi1\_ d1eo8l1 d1qfwl\_ d1n7ml1 d1igja1  
d1c5ch1 d2a9mh\_ d1rmfh1 d1fj1b1 d4heme\_ d1ccza1 d1a5fh1 d1ogad1  
d1dlfh\_ d1qa9b\_ d1vgel1 d3qskb\_ d1sjxa\_ d4ozfg1 d1sq2n\_ d1qd0a\_  
d1kcvh1 d1c5db1 d3qcull d8faba1 d3bn9d1 d1mjuh1 d4y8dc\_ d7fabh1  
d3dvgb1 d1lo0l1 d1a6tb1 d1gigh1 d1kcrh1 d2hwz1l d1yjdcl d3clfl1  
d4krna\_ d1dl7l\_ d1e6ol1 d1mexh1 d3r0ma\_ d4kkna\_ d1fnsl1 d1oaqh\_  
d1rzia1 d1ucbh1 d1ncwl1 d4b41a\_ d1nfdfl d2mpah1 d2d7tl1 d4grwf\_  
d4b5ea\_ d1lk3h1 d3u79a\_ d4u3xa\_ d1ghfl1 d1bvkb\_ d1mcww1 d1b88a\_  
d1jrrh1 d32c2b1 d4wemb\_ d1dsfh\_ d1op3h1 d1ce1l1 d1iqda1 d1qoka1  
d1qoka2 d1qfuh1 d2crya1 d1ay1h1 d1oaql\_ d3ab0b\_ d1rurl1 d1t4kb1  
d1bz7b1 d1n0xh1 d1for1l d1ucbl1 d4w6yb\_ d43c9a\_ d2aabl1 d1tzia1  
d4n1ca\_ d1k6qh1 d3g9ab\_ d4tvsa1 d1ligmh\_ d1pz5b1 d3dx9a1 d3wxwh\_  
d1nakhl d1kcul1 d3eaka\_ d4qlra1 d1cr9l1 d1d9ka\_ d1f4xl1 d1deea1  
d2i27n2 d1c12a1 d2orb1l d1j8hd1 d1mcph1 d1c5da1 d1kenh1 d1bd2e1  
d1h5ba\_ d4x7fc1 d3upaa\_ d1t3fa1 d1indh1 d2dtgc1 d4hc1l1 d1zv5a1  
d4wgvb\_ d1uwgl1 d4f37k1 d1aqkh1 d1vesa\_ d3zkqd\_ d1fpt1l d1lo4l1  
d1knob1 d3rrqa\_ d1ct8b1 d4orz\_ d1mlbb1 d4hgkc1 d1dgd1l d1bogb1  
d4ozhe1 d1dr9a1 d1i7za1 d1dn0b1 d1kell1 d1rzib1 d1ypzfl d1wtla\_  
d1hkfa\_ d1fail1 d1figh1 d2vyre\_ d1sjva\_ d1ohqa\_ d1bfoa1 d1pkqb1  
d1mjul1 d1b4jl1 d1nsnl1 d2arjb1 d1p4bh\_ d4aj0a\_ d3nn8b\_ d2rcja1  
d1f2xk\_ d4v1dd\_ d1adqh1 d2eksa\_ d4k3ga\_ d1jfqh1 d1uweh1 d1frgh1  
d4gftb\_ d1uz8b1 d4n1ea\_ d1bm3l1 d1clo1l d3mcka1 d2vq1a1 d1ae6h1  
d4aq1b1 d1uj3b1 d1nbqa1 d1fh5l1 d2ck0l1 d2ywza\_ d1q72l1 d4nxbx\_  
d1hila1 d4hz1b1 d2j88l1 d1zmya1 d1cd0a\_ d1a4ka1 d1pskl1 d1a0qh1  
d4krmb\_ d1ncbh1 d2fbjh1 d1j8he1 d1i3ua\_ d1cf8l1 d1fe8h1 d2p1ya1  
d1eeqa\_ d2x89a\_ d1ol0a\_ d2r0lh1 d1ub5a1 d1dfbh1 d3eyvb1 d4jdvb1  
d4p2cg\_ d2gsia1 d2agjl1 d1u3ha1 d2h1ph1 d1rihl1 d1fskc1 d1boga1  
d2a77l1 d1ospl1 d1qfoa\_ d3dwta\_ d2fx7l1 d1rz7l1 d3stba1 d1pkqa1  
d1b6da1 d1dzba2 d1dzba1 d1kj2a\_ d4l1ha\_ d1rzgb1 d1dqlh\_ d12e8l1  
d1mie1l d1jmaa\_ d1sbs1l d1fgnh1 d1f58l1 d1mqkh\_ d1ndgb1 d3qegl1  
d1iail1 d2aw2a1 d1tqbc1 d3fo2a1 d4dkaa\_ d1f8th1 d2g60l1 d2ywy\_  
d1uj3a1 d1yc7a\_ d3bd3a\_ d4w6xb1 d1nmb1\_ d1i8ka\_ d1rjlb1 d1ypze1  
d1p7kb1 d1kxqe\_ d1gpoh1 d2z4qa1 d1w72h1 d1i9rl1 d4qgya1 d4xt1c\_  
d2qqnh1 d1cical d3c08h1 d2cd0a\_ d2bdnh1 d1hnga1 d1mam1l d1nldh1  
d1cr9h1 d4lcih1 d3bkyl1 d3qg7l1 d1ai1l1 d1kxvc\_ d4iosd\_ d1l7ih1  
d2x1qa\_ d1ub6b1 d3k74b\_ d1libgh1 d1teth1 d1igya1 d1hxma1 d2x6ma\_  
d2e7la\_ d5e03a\_ d1qfwm\_ d2r0kh1 d1igjb1 d1rurh1 d1plgh1 d1mj8h1  
d1yuhb1 d3fmg1l d1rzfl1 d1emtl1 d1ad9b1 d1igtb1 d1nlbl1 d1d5ih1  
d3k7ua\_ d4ffyh\_ d1bwwa\_ d3dvga1 d1a6ta1 d1fgvl\_ d4qxgl1 d1mim1l  
d1jh1l\_ d2hffb1 d2hh0l1 d1qkzh1 d1l7tl1 d1afvh1 d1iaii1 d2cjuh\_  
d1um5h1 d2ghwb2 d2ghwb1 d1kgce1 d2fgwh1 d1ikfh1 d1dvfd\_ d2i24n1  
d2xtjb\_ d1za3b1 d2ycla\_ d2hh0h1 d2x1oa\_ d1bvka\_ d1rjla1 d5e7ba1

d1igta1 d1l11b1 d2fb411 d1mvua\_ d1jpt11 d32c2a1 d1fvca\_ d1iqdb1  
d2hrph1 d2p4ab\_ d4qola\_ d1p2cb1 d1wt5c\_ d1t4ka1 d5c1mb\_ d1it911  
d1bz7a1 d1b2wh1 d1e4w11 d1jnl11 d1yedb1 d1za6b1 d3u7aa\_ d1igfh1  
d3gnm11 d1orsa1 d1wejl1 d1a2ya\_ d1hxmb1 d1gafh1 d2j4wh1 d1pz5a1  
d1j05a\_ d1a3rh1 d4fq111 d1qfwh\_ d1eo8h1 d1n7mh1 d4s11a\_ d1kegh1  
d5da4a\_ d1iqw11 d3whxb1 d1vgeh1 d1deeb1 d1c12b1 d1t2q11 d1ad9a1  
d3gsnb1 d3b2uc1 d1ggbh1 d1t3fb1 d1nak11 d4ocmc\_ d1l1la1 d2v7hb3  
d2esve1 d1mcoh1 d2qr0b1 d2q3aa\_ d1ct8a1 d1kcrl1 d2pxyb\_ d2uzih\_  
d5c3ld\_ d3durb\_ d1c5c11 d2ak4e1 d1d17h\_ d1xiwd\_ d1mlba1 d1rmfl1  
d1i7zb1 d1d1fl\_ d2xa3a\_ d5bq7b1 d1dqqb1 d3h4211 d1legjh1 d1kcv11  
d1fe811 d2j6e11 d1f3rb2 d11k311 d1sm3h1 d1q0xh1 d1ghfh1 d7fab11  
d1igch1 d1l00h1 d4idla\_ d5c2b1\_ d1jrh11 d1l1la1 d3zhda1 d4kfzc\_  
d1b0wa\_ d1e6oh1 d1mex11 d4krpb\_ d1fnsh1 d1ncwh1 d4hgma\_ d4eigb1  
d4rzca\_ d2mpa11 d4y5xa\_ d5en2b1 d3lrga1 d4ej1c1 d1rhha1 d1j05b\_  
d1forh1 d1q9wb1 d2wzpd\_ d2aq2a1 d1h0da1 d3revb1 d2ij0c1 d1tzh11  
d4m7j11 d1k6q11 d3b9kc1 d1igml\_ d3qea1 d1dsfl\_ d1ce1h1 d1kcu11  
d1zvha1 d1zvoa1 d1tqbb1 d1ay111 d2qsc11 d2cgrh1 d1n10h1 d1ken11  
d3eo0a1 d4n9ob1 d1n0x11 d3k1kc\_ d1prtc1 d2wv6d\_ d1prtf\_ d1ltrd\_  
d4163b1 d1r4pb\_ d1prtd\_ d1t10f\_ d2bosa\_ d1prtb1 d3chbd\_ d2aq2b1  
d1ck1a1 d1enfa1 d1i4pa1 d1v1oa1 d1et9a1 d1esfa1 d2g9hd1 d4ohja1  
d1klud1 d1bxta1 d1eu3a1 d1ty0a1 d1fnua1 d2cqva1 d1fhga\_ d2k1ma\_  
d2d12a1 d1biha3 d1biha1 d1biha4 d3qp3a1 d1g1ca\_ d1gxea\_ d1cvsc2  
d1cvsc1 d1xmwa2 d1m4ka2 d2otpa2 d1biha2 d1rhfa2 d2fcba2 d2fcba1  
d1wwbx\_ d1gsma2 d1epfa1 d1epfa2 d2dava1 d1waaa\_ d1f97a2 d1x44a1  
d1vcaa2 d1fnla2 d1fnla1 d3b5ha2 d3h8na2 d3h8na1 d1jbja1 d1jbja2  
d1pd6a\_ d1f2qa2 d1f2qa1 d3cx2a\_ d1nbqa2 d3b5ha1 d1n26a1 d1xiwb\_  
d1xaua\_ d1fltx\_ d2ifga1 d1olla1 d1olla2 d1cs6a4 d1cs6a3 d1cs6a2  
d1cs6a1 d2gw5a2 d1sy6a1 d1xiwa\_ d1lucta2 d1lucta1 d1ry7b2 d1gl4b\_  
d1qz1a3 d1olza1 d2c9aa1 d1wwca\_

**Family-83 (d.15.4.1)**

**Positive dataset contains 7 protein sequences.**

d3wcqa\_ d1wria\_ d3av8a\_ d1rfka\_ d3p1ma1 d3b2ga\_ d2bt6a2

**Negative dataset contains 4090 protein sequences.**

d1libja\_ d1c7na\_ d1iuga\_ d4q75a\_ d2bkwa1 d1t3ia\_ d1n8pa\_ d1qz9a\_  
d1j9a\_ d1leg5a\_ d1p3wa\_ d3kgwa\_ d1cl1a\_ d2ctza1 d1vjoa\_ d2rfva\_  
d1gc0a\_ d1cs1a\_ d1d2fa\_ d2ch1a1 d1qgna\_ d1pffa\_ d1elua\_ d2xlba\_  
d3m83a1 d1u08a\_ d1lc5a\_ d2ay1a\_ d1bw0a\_ d3pd6a\_ d7aata\_ d2csta\_  
d1j32a\_ d1fg7a\_ d4wlha\_ d1o4sa\_ d1v2da\_ d1gdea\_ d1m6sa\_ d1v72a1  
d1svva\_ d1ajsa\_ d1wsta1 d2f8ja2 d1lk9a\_ d1vp4a1 d1xi9a1 d2gb3a1  
d1yaaa\_ d3i2ka1 d1lnsa3 d1mpxa2 d2cfba1 d1o69a\_ d1bj4a\_ d3k28a\_  
d2bwpa\_ d3lg0a\_ d2fnua\_ d3ou5a\_ d1z7da1 d1b9ha\_ d1iaya\_ d4msoa\_  
d1bs0a\_ d1s0aa\_ d1sffa\_ d3tqxa\_ d1mdoa\_ d3qboa\_ d3pgya\_ d1bjna\_  
d2dkja\_ d1ejia\_ d1vefa1 d4wxga\_ d3bs8a\_ d3gbxa1 d1w23a\_ d1m8pa3  
d1e57b\_ d1auyb\_ d1f56a\_ d1bypa\_ d1azca\_ d1ws8a\_ d3u25a\_ d1cuoa\_

d1id2a\_ d1rkra\_ d2iaac\_ d4dp1x\_ d1nwpa\_ d2gima\_ d2i7sa\_ d1qhqa\_  
d3ehbb1 d1fftb1 d1gyca3 d1hfua2 d1kbva1 d1kbva2 d1sdda1 d1sdda2  
d1gyca1 d1gyca2 d1mzya1 d2bw4a1 d1aoza1 d1aoza3 d1aoza2 d1kyaa2  
d1kyaa3 d1kyaa1 d1mzya2 d4e9sa1 d1sddb1 d1sddb2 d1hfua1 d1hfua3  
d1oe1a2 d1oe1a1 d1v10a2 d1v10a3 d1v10a1 d2w0pa\_ d2diaa1 d2e9ia2  
d2e9ja1 d2dj4a1 d2eeba1 d2diba1 d2dmba1 d2dmca1 d2d7oa1 d2ee6a1  
d2d7pa1 d2eeaa1 d2di8a1 d1wlha1 d2d7na1 d2nqca\_ d2d7ma1 d2dica1  
d3cnka\_ d2k3ta1 d2eeca1 d1qfha1 d2bp3a1 d1v05a\_ d2ee9a1 d2eeda1  
d2di9a1 d1a3qa1 d1iknc\_ d3brda1 d1p7h11 d1oy3c\_ d1imhc1 d1zk9a1  
d2cxka1 d2bema\_ d1pama1 d1ea9c1 d1qhoa1 d2fhfa2 d2fhfa1 d1k3ia1  
d1j0ha1 d1cxa1 d2bhua1 d1edqa1 d1f1sa2 d1ut9a2 d1gvia1 d1txka1  
d1adqa1 d1fnga1 d1uvqb1 d1zs8a1 d2vola1 d2vola2 d1mfb12 d2jelh2  
d1uwe12 d3qq4b1 d1kjob\_ d1k5na1 d1osph2 d4odh12 d1low0a1 d1low0a2  
d1bfob2 d3l9ra2 d3jtth1 d2fath2 d4elkb2 d1fn4b2 d2xfxb\_ d1pg7x2  
d1cqka\_ d4k71b2 d1l1k2a1 d1eapb2 d4l1fhg2 d1i4fa1 d2nw2a2 d1kfah2  
d1mhca1 d1h3ua1 d1wejh2 d1h0db2 d1a5fh2 d1kcvh2 d1mjuh2 d1qqda1  
d1kcrh2 d1k8ia1 d3huja2 d2nnab1 d1nfd2 d3mffb2 d1s9va1 d1l1k3h2  
d1q0x12 d1fv1b1 d1neza1 d4rfeb2 d1r3ha1 d1a6tb2 d1kja1 d1pz5b2  
d1onqa1 d2bc4a2 d1de4a1 d1k8da1 d1tcra2 d1dn0b2 d1nfd2 d2xwtb2  
d1bfoa2 d1mexh2 d1iakb1 d1ypzf2 d4f7ea2 d1q7212 d2fbjh2 d1fe8h2  
d1clzh2 d1fngb1 d1uvqa1 d1vgka1 d1c16a1 d4j12a2 d4x99b2 d1igtb3  
d1je6a1 d1q72h2 d1nldh2 d1teth2 d2hmic2 d1ilca2 d1ilca1 d1k8ib1  
d1q0yh2 d1kfa12 d3frua1 d1pg7w2 d1u58a1 d1igyb4 d1igyb3 d1hyrc1  
d1klub1 d1deeb2 d1c12b2 d2bc4b2 d2ig2h2 d1kcv12 d3wn5b1 d1l1k2b\_  
d1l1k312 d1mju12 d1sm3h2 d1q0xh2 d1zvs1 d1ydp1 d1u8ib2 d1ypze2  
d1kcu12 d4alac\_ d1rera1 d1s6na\_ d3uzqb\_ d1mqta\_ d1d4m3\_ d1fmd3\_  
d2mev1\_ g1aym.1 d1ev13\_ d4q4w1\_ d1r1a3\_ d2x5ia\_ d1rhi1\_ g1r1a.1  
g1d4m.1 g1rhi.1 d1b35b\_ d1lopa\_ d1tme1\_ d4iv1a\_ g1pvc.1 g1fpn.1  
d1fpn1\_ d4gb31\_ d1d4m1\_ d1fmd1\_ d1ev11\_ d2wzr3\_ g1cov.1 d1qqp3\_  
g1fmd.1 d2x5ic\_ d1rhi3\_ g1oop.1 d1hxs1\_ d1fpn3\_ d1bev1\_ g2mev.1  
d1eah3\_ d1aym1\_ d1pvc3\_ d1qqp1\_ d1zba3\_ d1h8ta\_ d3vbhc\_ g1b35.1  
g1bev.1 d1hxs3\_ g1ev1.1 d1bev3\_ g1tmf.1 d1tmf1\_ d1b35a\_ d2mev3\_  
g1eah.1 g1h8t.1 d1eah1\_ d4q4w3\_ d1r1a1\_ d1aym3\_ d1pvc1\_ d1zba1\_  
d1h8tc\_ d1oopc\_ d1tme3\_ g1qqp.1 d4iv1c\_ g1tme.1 d1ktja\_ d1ds6b\_  
d1fstb\_ d4w9ta\_ d1jvna1 d4x2ra1 d1ka9f\_ d1qo2a\_ d4axka1 d1thfd\_  
d4u28a\_ d2y88a\_ d4wd0a\_ d1vzwa1 d2bjca1 d2hsga1 d1qpza1 d1efaa1  
d1k9ua\_ d2opoa\_ d1r0ka3 d1j5pa3 d1vkoa2 d1vm6a2 d3qvs2 d1gr0a2  
d1p1ja2 d2ovga\_ d1sq8a\_ d1rzsa\_ d3kz3a\_ d3orca\_ d3gpdg2 d2q49a2  
d1hdgo2 d2g17a2 d2cvoa2 d2czca1 d3pwka2 d1obfo2 d1i32a2 d1zyao2  
d2pkqo2 d1b7go2 d2hjsa2 d1cf2o2 d1vkna2 d1nvm2 d2msya\_ d2djoa1  
d2r5za\_ d1au7a1 d1f43a\_ d2lmda1 d1akhb\_ d1s7ea1 d3nara\_ d1zq3p1  
d2craa1 d1mija\_ d4uuta\_ d3a01a\_ d1x58a1 d3rkqa1 d3cmya1 d2cqa1  
d2da6a1 d1e3oc1 d1fjla\_ d1mh3a1 d1ig7a\_ d1x41a1 d1wh7a1 d1gt0c1  
d2mw8a\_ d1lfup\_ d1x2ma1 d1b72a\_ d1wi3a1 d1jgga\_ d1wjha1 d1x2na1

d1mnmc\_ d2cuea1 d3k2aa\_ d2hosa\_ d2jwta2 d1pufa\_ d1oetcl d2hi3a\_  
d1b8ia\_ d4j19a\_ d3lnqa\_ d1wh5a1 d1b8ib\_ d1fexa\_ d2cqra1 d1guua\_  
d1ug2a1 d2cqqa1 d2ajea1 d4a69c\_ d1h8ac1 d2crga1 d2iw5b1 d1xc5a1  
d2cu7a1 d1wgxa1 d2cjja1 d2ckxa1 d1gvda\_ d1hcra\_ d1tc3c\_ d1gdta1  
d1u78a2 d6paxa1 d1k78a1 d1k78a2 d1hlva1 d1hlva2 d1iufa2 d1igna1  
d2iu5a1 d1zk8a1 d2g7sa1 d2fd5a1 d2np5a1 d1z0xa1 d2id6a1 d2d6ya1  
d2i10a1 d1vi0a1 d2oi8a1 d3c07a1 d2ns7a1 d2fq4a1 d2yvea1 d1t33a1  
d2o7ta1 d1rkta1 d2np3b1 d2g7ga1 d2gena1 d2fbqa1 d2g7la1 d2gfna1  
d2g3ba1 d2jj7a1 d2hyja1 d1sgma1 d1ui5a1 d2hkua1 d2id3a1 d4jyka1  
d1b10a1 d1d5ya1 d1d5ya2 d3lv8a\_ d1s3ga1 d1zaka1 d1s4qa\_ d3tvta2  
d1uf9a\_ d1khta\_ d1ckea\_ d1osna\_ d1p5zb\_ d3cm0a\_ d1tmka\_ d1jaga\_  
d3h86a\_ d1t0hb\_ d1nn5a\_ d2h92a\_ d3kb2a1 d2c95a1 d1yj5a2 d1kgda\_  
d1ly1a\_ d2ak3a1 d1vyva2 d1deka\_ d2grja1 d1p3ja1 d1y63a\_ d1e4ya1  
d1s96a\_ d3iija1 d1lvga\_ d1nksa\_ d1vyua2 d4e22a\_ d1qf9a\_ d1jjva\_  
d1q3ta\_ d1ki9a\_ d1lw7a2 d1teva\_ d1kjwa2 d1gsia\_ d1x6va3 d1odfa\_  
d1uj2a\_ d4gi7a\_ d2jeoa1 d1rz3a\_ d1z0ja1 d3umra2 d3gj0a1 d2gaoa1  
d1yzga1 d1x3sa1 d1g7sa4 d1puja\_ d1udxa2 d1kk1a3 d2o52a\_ d1jwyb\_  
d1zcaa2 d1zcba2 d2fv8a1 d2cjwa\_ d3dz8a1 d1xzpa2 d1vg8a\_ d4qxaa\_  
d2ew1a1 d1x1ra1 d2bcgy\_ d3doea1 d3cona\_ d3rega\_ d3wyga\_ d1upta\_  
d2b6ha1 d1zd9a1 d1lnza2 d1r5ba3 d1n0ua2 d1r2qa\_ d2f91a1 d2rhda\_  
d3q3jb\_ d3q85a\_ d1efma1 d1r8qa\_ d2gf9a1 d2akab1 d1ek0a\_ d1z08a1  
d2gcoa1 d2dyla2 d4g01b\_ d2cxxa1 d1svia\_ d3q72a\_ d1ni3a1 d4ac9a4  
d2erxa1 d2bmea\_ d1wxqa1 d2gf0a1 d4ldja1 d1zunb3 d1d5ca\_ d4lv5b\_  
d1efca3 d1kmqa\_ d2g6ba1 d3lrpa\_ d1tada2 d2y8ea\_ d4rd4a1 d1z06a1  
d2heia\_ d3a58b\_ d1u0la2 d1d2ea3 d1zj6a1 d2ocba\_ d3rwoa\_ d1mr3f\_  
d2e9sa1 d4u5xa1 d2iwra\_ d2fn4a1 d3bwdd\_ d2nzja1 d2atva1 d2ksqa\_  
d3143a\_ d1mkya2 d1mkya1 d1wmsa\_ d1jnaya3 d2rmka\_ d1f6ba\_ d1f60a3  
d1gota2 d1jala1 d2fh5b1 d1g16a\_ d2wblc\_ d1m7ba\_ d1wf3a1 d1f5na2  
d1t9ha2 d1z6xa1 d1z0aa1 d2fg5a1 d2a5ja1 d2bcjq2 d1s0ua3 d1ky3a\_  
d4y0va\_ d4lhwa\_ d2qmea1 d2atxa1 d1egaa1 d1ryha\_ d1moza\_ d1nrjb\_  
d2erya1 d3bfka\_ d1puia\_ d1fzqa\_ d3j3az1 d3t5ga\_ d1shza2 d3defa\_  
d2f7sa1 d3raba\_ d3tsoa\_ d3aq4a\_ d2a17a1 d3sfva1 d3bc1a\_ d2ncda\_  
d1sdma\_ d3h4sa1 d2heha\_ d2grya\_ g3kin.1 d1kk8a2 d1br2a2 d1f9va\_  
d2mysa2 d1lkxa\_ d3t0qa\_ d4db1a1 d3gbja\_ d1ry6a\_ d1v8ka\_ d1k8ka2  
d1k8ka1 d3uleb1 d3i33a2 d3i33a1 d1dkgd2 d1dkgd1 d4ci6a2 d1jcfa1  
d4a2ba2 d2fxua1 d1yaga2 d1yaga1 d4cbua2 d1bupa2 d1lig8a1 d1czan2  
d1czan3 d1czan1 d1lig8a2 d1czan4 d1bg3a4 d1bg3a3 d1bg3a1 d1hroa\_  
d4gedb\_ d3zooa\_ d1mz4a\_ d1gu2a\_ d1f1fa\_ d1dvva\_ d1c6ra\_ d1c75a\_  
d1e29a\_ d1gdva\_ d1cnoa\_ d1h32b\_ d1co6a\_ d2bh4x\_ d2aiua\_ d5cytr\_  
d1i8oa\_ d2zboa\_ d3dmia\_ d1ls9a\_ d1wvec\_ d2yk3a\_ d3ph2b\_ d1dw0a\_  
d5aura\_ d1ql3a\_ d1qn2a\_ d1f1ca\_ d2nqya\_ d1h4ga\_ d1hixa\_ d1oa2a\_  
d1olra\_ d3b7ma\_ d4h7ma1 d3wp3a\_ d2vgda\_ d1igoa\_ d3zsea\_ d2nlra\_  
d3wx5a\_ d1oa3a\_ d1pvxa\_ d1f5ja\_ d1oa4a\_ d1ks5a\_ d4ixla1 d1levsa\_  
d1cnt1\_ d1pvhb\_ d1z7ca\_ d1huwa\_ d1bgea\_ d1rhga\_ d1f6fa\_ d1f45b\_

d1i1rb\_ dlaxia\_ dletea\_ d3tgxb\_ dlscfa\_ d2z3qa1 d3qb1a\_ dlhula\_  
d1m48a\_ d4nkqb\_ dleera\_ dl1v7mv\_ d5e4ea\_ d2o27a\_ d3b5ka\_ d2psma1  
d4zf7a\_ d3uf5a\_ d3rbaa\_ d2qtra\_ dl1nupa\_ d3l92a\_ d1f9aa\_ d1qjca\_  
d2h29a\_ dl1vlha\_ dl1od6a\_ dl1lw7a1 dl1mrza2 d4ruka\_ d2e17a\_ dl1iq0a2  
dl1irxa2 dl1r6ta2 dl1ivsa4 d2cyba\_ dl1rqga2 dl1j09a2 d2yxna\_ dl1f7ua2  
dl1h3fa1 dl1ffya3 d2g36a1 dl1nzja\_ dl1n3la\_ dl1i6la\_ dl1pfva2 dl1h3na3  
d3n9ia\_ d3sz3a1 d3sw2a\_ dl1moxc\_ dl1dx5i3 dl1edmb\_ dl1autl2 dl1autl1  
dl1nqlb\_ dl1dval1 dl1szba2 dl1kigl\_ d2y5f1\_ dl1ijqa2 dl1gk5a\_ dl1g1sa2  
dl1nt0a3 dl1xdtr\_ dl1lmja2 dl1lmja1 dl1nzia2 d2wphe\_ dl1klil\_ dl1pfxl2  
dl1pfxl1 dl1p9ja\_ dl1g1ta2 dl1f7ea\_ d4yzub\_ dl1lr7a1 d2mgpa1 dl1b9wa1  
dl1b9wa2 d2mgpa2 dl1ob1c1 dl1n1ia2 dl1n1ia1 d2npra2 d2npra1 dl1m1xb5  
d2y5ia\_ dl1qlsa\_ dl1psra\_ d3n22a\_ d2egda\_ d4ggfc\_ d2wcea\_ d2luca\_  
d4aqia\_ d3nsia\_ d2lp3a\_ dl1j55a\_ dl1a4pa\_ dl1k8ua\_ dl1nsha\_ dl1pvaa\_  
d3fs7a\_ dl1ttxa\_ dl1rwy\_ d2kyfa\_ dl1rk9a\_ dl1a75a\_ dl1exra\_ dl1tiza1  
dl1nyaa\_ dl1g8ia\_ dl1ggwa\_ dl1wdcc\_ d3fwba\_ dl1ggza\_ d2o5ga\_ dl1ctaa\_  
dl1m45a\_ d3i5gc\_ dl1s18a\_ dl1fpwa\_ d2scpa\_ d2roaa\_ d4aqra\_ d3pn7b\_  
dl1br1b\_ d2mysb\_ dl1s6ca\_ dl1bjfa\_ d2obha\_ dl1jfka\_ dl1jf0a\_ dl1qv0a\_  
dl1lkja\_ d2mlfc\_ d2m97a\_ d2d8na\_ d4by5a\_ dl1jbaa\_ d4nqga\_ dl1wdcb\_  
d2mysc\_ dl1j7qa\_ dl1s6ia\_ dl1uhka2 dl1r2ua\_ dl1dtla\_ d3kf9a\_ d3pn7c\_  
dl1qjta\_ dl1fi6a\_ dl1c07a\_ dl1gjya\_ dl1y1xa\_ dl1hqva\_ dl1dvia\_ dl1df0a1  
dl1qxp2\_ d4usla\_ dl1k94a\_ dl1wkya2 dl1uuqa\_ d3wh9a\_ d4mlra\_ dl1xyza\_  
d4xuya\_ d2je8a5 d4bf7a1 d3cuia\_ dl1ur4a\_ dl1qw9a2 dl1odza\_ d2vzsa5  
dl1bqca\_ d2x2ya1 dl1hjqa\_ dl1qnra\_ d4y7ea1 dl1vjza\_ d4k68a\_ d2v3ga\_  
d4hpga\_ dl1nofa2 dl1nq6a\_ dl1h4pa\_ dl1aq0a\_ d3ziza\_ d4bs0a\_ dlecea\_  
dl1h1na\_ dl1ta3b\_ dl1w91a2 dl1ilwa\_ dl1us3a2 dl1egza\_ d7a3ha\_ dl1tvna1  
d3nyda1 dl1ghsa\_ d2cyga1 d4xv0a\_ d2c8na2 dl1w32a\_ d3emca\_ dl1v6ya1  
dl1foba\_ d2uwfa1 d2fgla\_ d3niya1 d2c0ha1 dl1rh9a1 dl1yq2a5 dl1szna2  
dl1fa2a\_ dl1pama4 d5do8a1 d1lea9c3 dl1hx0a2 d2fhfa5 dl1qhoa4 dl1avaa2  
dl1m53a2 d4m8ua1 d2gjpa2 dl1lwha2 d4howa1 dl1ktba2 dl1j0ha3 d3vm5a1  
d2x1ia\_ dl1wzaa2 dl1uasa2 d2diea1 dl1mxga2 dl1ht6a2 dl1eswa\_ dl1iv8a2  
d5cpsa\_ dl1ud2a2 dl1zjaa1 d3gbea1 dl1kwga2 dl1wdpa\_ dl1gcya2 dl1g5aa2  
dl1hvxa2 d3dhp2\_ d2bhua3 d4do4a1 d3qgva1 dl1e43a2 dl1g94a2 d2d3na2  
dl1gjwa2 dl1gvia3 dl1x1na1 dl1r7aa2 dl1tz7a1 d2x42a1 dl1tr9a1 d3abza1  
d4c7ga2 d2gjxa1 dl1jaka1 dl1yhta1 d4toqa\_ dl1wb0a1 dl1w9pa1 dl1eoka\_  
dl1itxa1 dl1kfwa1 dl1goia2 dl1edqa2 d2gsja\_ dl1hjxa1 dl1jnda1 dl1vf8a1  
dl1etob\_ dl1umqa\_ dl1g2ha\_ dl1mixa2 dl1e5wa2 dl1j19a2 dl1isna2 d2a16b2  
d3syxa1 dl1mkea1 d2p8va\_ dl1xoda1 dl1i7aa\_ dl1qc6a\_ dl1legxa\_ dl1lid1a\_  
d2hmta\_ dl1iuka\_ d2csua1 d3q9ub\_ d2yv1a1 d3q9na\_ d2d59a\_ dl1oi7a1  
d2yv2a1 dl1euca1 dl1y81a1 dl1wgqa1 dl1v89a1 d2coda1 dl1zc3b\_ dl1wg7a1  
dl1u5ea1 dl1v61a1 d2coca1 d2ys1a1 dl1v5pa1 dl1ntya2 dl1wjma1 dl1wi1a1  
dl1u29a\_ dl1xx0a1 dl1unqa\_ d2zkmx3 dl1fhoa\_ dl1v88a1 d2adza1 dl1x1fa1  
dl1p6sa\_ d2coaa1 dl1btka\_ dl1v5ma1 dl1faoa\_ d2x18a\_ dl1dyna\_ dl1x1ga1  
d4kaxb\_ d2j59m1 dl1ki1b2 dl1xcga2 dl1txda2 dl1u5da1 dl1dbha2 dl1wlha\_  
dl1upqa\_ dl1v5ua1 dl1foea2 d2fjla1 dl1eaza\_ d2dfka2 d2cofa1 dl1kz7a2

d1h6ua1 d9ldta1 d2ewda3 d1up7a1 d2dfda1 d1s6ya1 d1vjta1 d7mdha1  
d1t2da1 d1ojsa3 d1b8pa1 d1ldna1 d1hyha1 d1civa1 d2a92a1 d1ez4a1  
d1i0za1 d1y6ja1 d1gv0a1 d1ur5a1 d1ll1da1 d1obba1 d1v8ba1 d1gdha1  
d2dlda1 d1mx3a1 d1ygya1 d1qp8a1 d1li4a1 d1j4aa1 d2naca1 d1npya1  
d3t4ea2 d1a4ia1 d1o0sa1 d2hk9a2 d2egga2 d1b26a1 d1bvua1 d1gq2a1  
d1clda1 d1leha1 d1gtma1 d1euza1 d1nvta1 d3dona2 d1ledza1 d1gpja2  
d1p77a1 d1nyta1 d1b0aa1 d1vl6a1 d1v9la1 d3wdpp1 d3wq5a\_ d1gnxa\_  
d4gxpa\_ d4hz8a\_ d1e4mm\_ d3aiua\_ d1wcca1 d3ahxa\_ d1v02a\_ d2dga\_  
d1pbga\_ d1vffa1 d1qoxa\_ d4ha4a\_ d1kola2 d1f8fa2 d1qora2 d1vj0a2  
d1cdoa2 d1gu7a2 d1d1ta2 d1xa0a2 d2dm6a2 d1jvba2 d1rjwa2 d1llua2  
d1h2ba2 d1tt7a2 d1piwa2 d1o89a2 d1liz0a2 d1e3ja2 d1yb5a2 d1uufa2  
d1vj1a2 d1e3ia2 d3gpdg1 d1vc2a1 d2nvwa1 d1u8fo1 d1ydwa1 d1hdgo1  
d2g17a1 d1cf2o1 d2czca2 d1r0ka2 d1lobfo1 d2cvoa1 d1ebfa1 d1h6da1  
d1i32a1 d1zh8a1 d2q49a1 d1qkia1 d1j5pa4 d3pzra1 d1xeea1 d1vkoa1  
d1vm6a3 d3qvsa1 d2pkqo1 d1b7go1 d1gr0a1 d1p1ja1 d1lc0a1 d1j0xo1  
d3pwka1 d2hjsa1 d1zyao1 d1vkna1 d1t1ta1 d1nvmb1 d3sjua\_ d3ojfa1  
d1xu9a1 d2jjya1 d1n7ha\_ d1y1pa1 d1h5qa\_ d1jtva\_ d4fs3a\_ d2bkaa1  
d1gy8a\_ d2c5aa1 d1ulsa\_ d1ooea\_ d2b69a1 d1y5ma1 d1aela\_ d1bxka\_  
d1ydea1 d1gega\_ d1hdoa\_ d1o5ia\_ d1e6ua\_ d1snya1 d2rhca\_ d3zv4a\_  
d5ceja\_ d2d1ya1 d1fjha\_ d3w8ea\_ d2fmua1 d1x1ta\_ d1rpna\_ d3ay7a1  
d1k2wa\_ d1eq2a\_ d2hrba1 d3ruaa\_ d2ew8a1 d4hwka\_ d1xgka\_ d2bd0a1  
d1yo6a1 d2a35a1 d2ntva\_ d1vl8a\_ d1hdca\_ d4bkua\_ d2ag5a1 d2q45a\_  
d1nffa\_ d4iy1a\_ d1zbqa1 d1kewa\_ d1lek6a\_ d1ja9a\_ d2q46a2 d1iy8a\_  
d1cyda\_ d2ptga\_ d1hxha\_ d1uzma1 d3lyla\_ d4m89a\_ d3wyea\_ d2b11a1  
d1w6ua\_ d1sb8a\_ d2q2va\_ d4nr0a\_ d1e6wa\_ d2gasa\_ d3oiga1 d2bgka1  
d1mxha\_ d1vl0a1 d1rkxa\_ d1r6da\_ d1wmaa1 d1e7wa\_ d2c07a1 d1xkqa\_  
d3tzha\_ d1g0oa\_ d3lz6a\_ d1qyca\_ d1ledoa\_ d1gz6a\_ d1loc2a\_ d1t2aa\_  
d1zema1 d2xoxa\_ d1z45a2 d1geea\_ d1p33a\_ d3lt0a\_ d4e6pa\_ d2wyua\_  
d1db3a\_ d4q9na\_ d1xhla\_ d4olma\_ d1fmca\_ d2uvda\_ d2gdza1 d1uaya\_  
d2z1ma\_ d2o23a2 d2fr1a2 d2fr1a1 d1qsga\_ d1qyda\_ d4zjua\_ d2a4ka1  
d1yb1a\_ d1wvga1 d1yxma1 d3f4ba\_ d1mg5a\_ d1xg5a1 d1e2ta\_ d4c5pa\_  
d2bsza1 d4bgfa\_ d1w4ta1 d1mdwa\_ d1qxp4 d1ziva1 d1zcma1 d1t3ca\_  
d1epwa3 d2a97a\_ d3f1ea\_ g1e1h.1 d3ioqa\_ d1fh0a\_ d1o0ea\_ d1m6da\_  
d2cb5a\_ d1cs8a\_ g8pch.1 d1s4va\_ d2pnsa\_ d1vsna1 d1mira\_ d1liwda\_  
d2oula\_ d7pcka\_ d3bwka\_ d3bcna\_ d2p86a\_ d1pvja\_ d1pcia\_ d1gece\_  
d1deua\_ d4bs6a\_ d1xkga1 d1cqda\_ d1jqpa2 d2c0ya\_ d2bdza\_ d3p5ua\_  
d1ex4a2 d2jk6a2 d2jk6a1 d1feca1 d1feca2 d1lpfa1 d1lpfa2 d1xhca1  
d1xhca2 d1dx1a2 d1dx1a1 d1gera2 d1m6ia2 d1onfa1 d1onfa2 d3lada2  
d3lada1 d1w4xa1 d1w4xa2 d1gesa2 d1mo9a1 d1xdia1 d1fl2a2 d1fl2a1  
d1fcda1 d1fcda2 d1h6va2 d1h6va1 d1mo9a2 d1gv4a2 d1gv4a1 d2gv8a2  
d2gv8a1 d1aoga1 d1aoga2 d1hyua1 d1ebda1 d1ebda2 d3dk9a1 d1q1ra2  
d1q1ra1 d1gesa1 d1zbfa1 d2z1ha\_ d2etja1 d3qioa1 d1j11a\_ d2e4la\_  
d21sna1 d1io2a\_ d1uaxa\_ d2yv0x\_ d1mu2a1 d1ekea\_ d1i39a\_ d1ps9a2  
d1lqta1 d1cjca1 d1pn0a1 d1reoa1 d1ju2a1 d2f5va1 d3c96a1 d2gmha1

d1pj5a2 d1gpea1 d1o5wa1 d1n4wa1 d1k0ia1 d2dw4a2 d2ivda1 d1seza1  
d2voua1 d1kdga1 d1s5ja1 d2hbja2 d2igia\_ d1wlja\_ d1qhta1 d4dlea1  
d1tgoa1 d2f96a1 d3tr8a1 d3mxma\_ d1q8ia1 d1y97a1 d1w0ha\_ d2py5a1  
d1noya\_ d1d5aa1 d1yt3a3 d2guia\_ d3mwpa1 d4kb1a\_ d2v76a\_ d1wj1a1  
d1aqca\_ d1qqga2 d1ntva\_ d1n3ha\_ d4dbba\_ d3f0wa1 d1p3ra\_ d1wgua1  
d2cy4a1 d3hqca\_ d1wvha1 d1xr0b1 d1jmx4 d1pbya3 d1pbya4 d1jmx2  
d1jmx1 d1pbya1 d1r7ha\_ d1faaa\_ d1wika1 d1xfla\_ d1ttza1 d2f51a1  
d1ti3a\_ d1nhoa\_ d1sena\_ d2i4aa\_ d1zmaa1 d1fo5a\_ d3lefa1 d3diea1  
d2yana1 d1z6na1 d1oaza\_ d3zywa1 d4aj8a\_ d1nm3a1 d4fiwa\_ d1wmja\_  
d4hs1a1 d1iloa\_ d1xwaa1 d1wjka1 d2vm1a\_ d1fb6a\_ d1gh2a\_ d1h75a\_  
d1nw2a\_ d1kx5b\_ d3a6na\_ d4m6ba2 d2nqbd\_ d3wkjd\_ d2yfwe\_ d4h9na\_  
d5bnxa\_ d1kx5c\_ d3r45a\_ d1eqzb\_ d4jjnb\_ d1f66c\_ d1eqza\_ d4wnnb\_  
d1kx5a\_ d1u35c1 d1id3a\_ d2nqbc\_ d1kx5d\_ d3us3a3 d3us3a1 d1tafa\_  
d1bh9b\_ d1tafb\_ d1jfib\_ d1q9ca\_ d1h3ob\_ d2byka1 d1n1ja\_ d4g92b\_  
d1bh9a\_ d1h3oa\_ d2bykb1 d1n1jb\_ d1pd212 d1nhya2 d2a2ra2 d1k0dd2  
d1f2ea2 d1gsua2 d1f3ba2 d2fhea2 d2pvqa1 d1tw9a2 d1oyja2 d1e6ba2  
d1k0ma2 d3ik7a1 d4is0a1 d1r5aa2 d1jlva2 d1m0ua2 d3gtub2 d1z9ha2  
d1okta2 d1axda2 d2gsra2 d1tu7a2 d1k3ya2 d1zgma1 d1gnwa2 d1gwca2  
d2gsta2 d1glqa2 d1oe8a2 d1pn9a2 d1v2aa2 d1fw1a2 d1duga2 d1ovna2  
d1iqca2 d1iqca1 d1eb7a2 d1eb7a1 d1nmla1 d1txga2 d3f47a1 d2pv7a2  
d1xc2a3 d2ahra2 d4xiya1 d2f1ka2 d1pgja2 d1i36a2 d1np3a2 d1lj8a4  
d1teaa3 d1qmga2 d2i76a2 d2g5ca2 d1wdka3 d1dlja2 d3cuma3 d1qqya\_  
d1f6ra\_ d1livma\_ d2gv0a\_ d1iiza\_ d2z2fa\_ d1j8xa\_ d1ghla\_ d1b9oa\_  
d1741a\_ d1691a\_ d2o4wa\_ d1p37a\_ d1k28a3 d1xjta1 d1jtma\_ d2f2qa\_  
d4e97a1 d3w3ea\_ d4tx7a\_ d3cq1a\_ d4msta\_ d3iwra\_ d2z37a\_ d4dyga\_  
d2pjsa1 d1k1la\_ d2i7ra1 d1ecsa\_ d1xqaa1 d5cj3a1 d1npba\_ d1jifa\_  
d2p7oa\_ d1nkia\_ d1mpya2 d1kw3b2 d4ghga1 d1tfza1 d3isqa1 d3isqa2  
d1sqia1 d1sqia2 d1lkda2 d1lkda1 d1mpya1 d1cjxa2 d1cjxa1 d1sp9b2  
d1t47a1 d1t47a2 d1f1ua2 d1sp8a1 d1sp8a2 d1f1ua1 d1w5qa\_ d2c1ha\_  
d1ohla\_ d1l6sa\_ d1qsta\_ d2beia1 d4m3sa\_ d1u6ma1 d1ygha\_ d1yk3a1  
d3dr6a\_ d1xmta\_ d1z4ea1 d2ge3a1 d1bo4a\_ d2fiaa1 d2jdca1 d1y9wa1  
d3to7a\_ d1wwza1 d2f14a1 d2ozua1 d2b5ga\_ d2cy2a1 d2p0wa\_ d1cm0a\_  
d4pswa\_ d1yrea1 d1yr0a1 d1m4ia\_ d2gana1 d1yvka1 d1ghea\_ d2g3aa1  
d1y7ra1 d2euia1 d1q2ya\_ d2fsra1 d1xeba\_ d2ae6a1 d1cjwa\_ d1qsma\_  
d2aj6a1 d1y9ka1 d1i12a\_ d1vkca\_ d2atra1 d1n71a\_ d2d4pa1 d2fiwa1  
d2fe7a1 d1tiqa1 d2ou2a\_ d1yx0a1 d2fcka1 d1p0ha\_ d2j8ma\_ d2pq8a\_  
d1z4ra1 d1s3za1 d1ufha\_ d2hqya1 d2hqya2 d1lrza2 d1ne9a1 d1ne9a2  
d1f37b\_ d1xvqa1 d1pn0a2 d3hy2a\_ d2cvba1 d1o8xa\_ d1lu4a\_ d1we0a1  
d2bmx1 d2a4va1 d1psqa\_ d1xiya1 d1q98a\_ d1n8ja\_ d1zofa1 d2ggta\_  
d3tjja\_ d4je1a1 d3s9fa\_ d2zcta\_ d1qmva\_ d1jfua\_ d2b1ka\_ d5dvba1  
d2b5xa1 d2v2ga\_ d1st9a\_ d3tb2a\_ d4llra\_ d4fh8a1 d1e2ya\_ d1knga\_  
d2h30a\_ d1i5ga\_ d2z9sa\_ d2f8aa1 d1tp9a1 d2b7ka\_ d1nm3a2 d3hvva\_  
d2wfca1 d4kcea\_ d1xvwa1 d4gqca1 d3qpma\_ d4k1fa\_ d1zzoa1 d1gp1a\_  
d1prxa\_ d1zsq1 d2m5ta\_ d1cqqa\_ d1wqsa\_ d5bpea\_ d2ipha\_ d1lvoa\_



d2bhga1 d3tnta\_ d3sjia\_ d3d23a1 d2fyqa\_ d3tloa\_ d3zvea1 d2hrva\_  
d3q3ya1 d4asha1 d2phla2 d2phla1 d1fxza2 d1fxza1 d1lrha\_ dluija1  
g1dgw.1 d2v09a\_ d1uika2 d1uika1 d1e88a1 d1l6ja5 d1leaka4 d1leaka3  
d1l6ja3 d1h8pa2 d1h8pa1 d1w52x1 d2ppla1 d1hpla2 d1lpbb2 d2oxea1  
d1bu8a2 d1rpla2 d1ys1x\_ d4hs9a\_ d1ispa\_ d1ex9a\_ d1ku0a\_ d3qmma\_  
d3rp2a\_ glucy.1 d1fuja\_ d2zchp\_ d3w94a\_ d1si5h\_ d1lo6a\_ g2pka.1  
d1cgha\_ d1kigh\_ d1a5ia\_ d3s9ba\_ d1hj8a\_ d1ao5a\_ d2anya\_ d1q3xa1  
d1gvza\_ d1azza\_ d4gsoa\_ d2f91a1 d1iaua\_ d1gdna\_ d1eufa\_ g1fiw.1  
d1eq9a\_ d4nfea\_ d2rdla\_ d1spja\_ d1elva1 d1a7sa\_ d1ekbb\_ d1pfxc\_  
d1yc0a\_ d2aiqa\_ g1fiz.1 d1fi8a\_ d4k60a\_ d4dgja\_ d1mzaa\_ d1lop0a\_  
d3tjva\_ d1pytd\_ d1sgfg\_ g1gg6.1 d2eeka\_ g1rtf.1 d1a0ja\_ d3g01a\_  
d1pytc\_ d4e7na\_ d1ddja\_ d1z8ga1 d2hlca\_ d1npma\_ d1brup\_ g1jou.1  
d1sgfa\_ d1autc\_ g2hnt.1 g1kdq.1 d3s69a\_ d4crga\_ d1fxya\_ d1lbqya\_  
d1lgya\_ d4l3wa\_ d1gz7a\_ d1lukca\_ d1cr6a2 d3groa\_ d1pjaa\_ d1ei9a\_  
d1ra6a\_ d1muka\_ d3gsza\_ d1khva\_ d1te9a\_ d2xwha\_ d3uqsa\_ d3hkwa\_  
d3n6ma\_ d2cjqa\_ d2xyma\_ d1teba\_ d1te8a\_ d1s48a\_ d1u09a1 d4wfxa\_  
d3tyqa\_ d2pgga1 d3zxha\_ d1cgl\_a\_ d1rm8a\_ d1leaka2 d1hy7a\_ d2jsda\_  
d1cxva\_ d1hv5a\_ d1i76a\_ d1eb6a\_ d3p0ya1 d1igra1 d1igra2 d1n8yc2  
d1n8yc1 d1m6ba2 d1m6ba1 d1jx4a2 d3gv5b1 d1t94a2 d3bq0a2 d2tbvc\_  
d1c8nc\_ d1x36a\_ d1smvc\_ d1ng0c\_ d4sbvc\_ d1lopa\_ d1f2nc\_ d1cixa\_  
d1y29a\_ d1v7fa\_ d2jtba\_ d1d1ha\_ d1g9pa\_ d1lupa\_ d1qk7a\_ d1mb6a\_  
d2a2va\_ d1niya\_ d1i25a\_ d1hvwa\_ d2mpqa\_ d1ie6a\_ d1kqha\_ d1la4a\_  
d2mxoa1 d1d10a\_ d1koza\_ d1qk6a\_ d1emxa\_ d1lqra\_ d1rmka\_ d1ixta\_  
d1eyoa\_ d1cnna\_ d1fu3a\_ d1g1pa\_ d1f3ka\_ d1fyga\_ d1rypd\_ d1irua\_  
d1rypc\_ d3unfk\_ d1rypa\_ d1j2pa\_ d1irui\_ d1j2qh\_ d3unfh\_ d1m4ya\_  
d1rypb\_ d1irul\_ d1irug\_ d1liru2\_ d1q5rh\_ d1rypg\_ d1g3ka\_ d1liruf\_  
d1q5qa\_ d1e94a\_ d1lirub\_ d1ryph\_ d3ty6a\_ d1liruj\_ d1liruk\_ d1rype\_  
d1lirud\_ d1lirue\_ d3mi01\_ d1rypf\_ d1liruh\_ d2z3ba\_ d1liruc\_ d3mka2\_  
d1liru1\_ d1ny721 d1ny722 d1a6ca3 d1a6ca2 d1a6ca1 d1pgl22 d1pgl21  
d1pgl11 d1ny711 d1jgta2 d1ofda3 d1ea0a3 d1ecfa2 d1q15a2 d1ct9a2  
d1te5a\_ d3ubub\_ d1legia\_ d1qo3c\_ d1v7pa\_ d1tdqb\_ d3ubua\_ d1c3ab\_  
d1h8ua\_ d3bx4b\_ d1t8ca1 d1sb2a1 d1qdda\_ d2ziba1 d3cada\_ d1byfa\_  
d1j34b\_ d1jwia\_ d1jzna\_ d1c3aa\_ d1oz7b\_ d1wmza\_ d3bdwb\_ d1hq8a\_  
d1fifa1 d1dv8a\_ d3hupa\_ d1wk1a1 d1umra\_ d2afpa\_ d3bx4a\_ d1gz2a\_  
d1sl6a\_ d1v7pb\_ d3g8ka\_ d1ixxa\_ d1j34a\_ d1jwib\_ d1g1sa1 d1y17a1  
d1ja3a\_ d3bdwa\_ d1sb2b1 d1fvua\_ d1umrc\_ d1oz7a\_ d4m17a\_ d3cfwa1  
d1ypqa1 d1g1ta1 d3fd4a\_ d3l9jc\_ d4dn8a1 d1v41b\_ d1rdl1\_ d2msba\_  
d1eixa\_ d3exra\_ d2ffca1 d2fdsa1 d3n3ma1 d2czda\_ d1q6oa\_ d2yyua\_  
d1vqta1 d1dbta\_ d3ldva1 d4lt9a1 d3tc7a1 d3hoja\_ d1i4na\_ d3vnda\_  
d3nl8a1 d1geqa\_ d3naval d1v5xa\_ d4a2ra1 d3tc6a1 d4ijba\_ d1xcfa\_  
d1vc4a\_ d1rd5a\_ d1qopa\_ d3b5va\_ d2r80b\_ d1cqa1 d1cg5a\_ d1gcvb\_  
d3boma\_ d2h8fb\_ d2raoa\_ d3bj1a\_ d4hrrb\_ d2r50a\_ d3d1kb\_ d2aalb1  
d3zhwa\_ d3hf4b\_ d3gdja\_ d1jebb\_ d3bj1b\_ d1x9fb\_ d1wmub\_ d1gcva\_  
d3bcqb\_ d3d4xb\_ d2dc3a\_ d3hf4a\_ d4yu3a\_ d3k8ba\_ d1qpwb\_ d2r80a\_

d3bcqa\_ d1v4wa\_ d3wtgb\_ d1j17a\_ d4esaa\_ d1a9we\_ d3d1ab\_ d1fsla\_  
d4h21a\_ d1v4wb\_ d1mwca\_ d1vhba\_ d1jeba\_ d1spgb\_ d1h97a\_ d1q1fa\_  
d1tu9a1 d3d1aa\_ d1hdsb\_ d3hyub\_ d2zfb\_ d3fs4a\_ d1oj6a\_ d1shrb\_  
d4h21b\_ d4yu3b\_ d1spga\_ d3hrwa\_ d3qqra\_ d3at5a\_ d4wchd\_ d3hyua\_  
d1cg5b\_ d1uc3a\_ d1hbra\_ d2raob\_ d1outb\_ d4esab\_ d3gdjb\_ d3qqqa\_  
d1x9fc\_ d3vrfa\_ d1litha\_ d3mkba\_ d3d4xa\_ d3mjpa\_ d1j16a\_ d3fh9a\_  
d1outa\_ d2dc3b\_ d1lit2a\_ d3eoka\_ d3g46a\_ d1qpwa\_ d3vrfb\_ d1ch4a\_  
d1x9fd\_ d1hdsa\_ d2zfb\_ d3mkbb\_ d1or4a\_ d3wtga\_ d1a4fa\_ d3fh9b\_  
d3bomb\_ d3cy5a\_ d3at5b\_ d1x9fa\_ d2oifa\_ d4lmb\_ d1cpcb\_ d3v57a\_  
d1kn1a\_ d1cpca\_ d4f0ta\_ d2vjha\_ d4po5b\_ d1eyxa\_ d1alla\_ d4f0tb\_  
d1b33b\_ d1b8db\_ d4h0mb\_ d1b33a\_ d2vjhb\_ d4lm6b\_ d2vmlb\_ d1allb\_  
d2vjta\_ d3dbja\_ d2vmla\_ d2vjtb\_ d4f0ub\_ d1f99b\_ d4rmpa1 d1liaa\_  
d1eyxb\_ d2uulb\_ d4lmsb\_ d4f0ua\_ d2bv8a\_ d1f99a\_ d2bv8b\_ d2c71b\_  
d3dbjb\_ d4rmpb1 d1b8da\_ d4h0ma\_ d3v57b\_ d1kn1b\_ d1liab\_ d2uula\_  
d2j96a\_ g1gxs.1 g1wht.1 d3c8da2 d2pbla1 d1jkma\_ d1lzl\_ d1jjfa\_  
d1g19b1 d1gkub1 d2qvba\_ d2v9za\_ d4kafa1 d4iuaa3 d4bvva\_ d5hpga\_  
d3k65a\_ d1ki0a3 d1ki0a2 d1ki0a1 d1a0ha1 d1pmla\_ d3sp8a3 d2feba1  
d1f74a\_ d3l21a\_ d2e1da\_ d1to3a1 d1w3ia\_ d1sfla\_ d1n7ka\_ d1vcva1  
d4imea\_ d1wa3a\_ d2ocza1 d1f2ja\_ d3m16a\_ d2yxga\_ d1ub3a\_ d3a5fa\_  
d1fbaa\_ d1l6wa\_ d1xfba1 d1wx0a1 d1vpxa1 d1ojxa\_ d2a4aa1 d1xkya1  
d3cq0a1 d3s1xa\_ d1f05a\_ d1fdja\_ d3cpa1 d4d2ja\_ d1cg2a1 d1yloa2  
d1y7ea2 d1y0ya3 d1lfwa1 d1vixa1 d1fnoa4 d1ysja1 d1vhea2 d1z21a1  
d2fvga2 d1vgya1 d1r3na1 d2grea2 d1xmba1 g1q71.1 d1rtqa\_ d2ftba\_  
d1pmpa\_ d2rcqa1 d1fdqa\_ d4lkpa\_ d1sa8a\_ d1vyfa\_ d1lpja\_ d3vg7a1  
d4azqa1 d1o8va\_ d5bvqa\_ d1p6pa\_ d2qo4a\_ d1opba\_ d1yiva1 d1o1va\_  
d4bvma1 d4tkba\_ d4i3ba\_ d1ftpa\_ d1ggla\_ d4gkca\_ d1cbia\_ d3p6da1  
d1kqwa\_ d2a0aa1 d1dzka\_ d4tlja\_ d2a2ua\_ d4wfva\_ d3t1da\_ d4iaxa\_  
d3zq3a\_ d2nnda\_ d1i4ua\_ d1kxo\_ d1bbpa\_ d1kt7a\_ d1exsa\_ d3s26a1  
d1lf7a\_ d1qfta\_ d4gh7a\_ d1z24a1 d1qabe\_ d1xkia\_ d3bx7a\_ d4iawa1  
d1n0sa\_ d1gkab\_ d3kzaa\_ d2k23a\_ d2l9ca1 d2joza1 d1gm6a\_ d3kffa\_  
d3saoa1 d1e5pa\_ d1yupa1 d1iiua\_ d3lgia\_ d3i77a\_ d2z9ia2 d4nsva\_  
d1lcya2 d4jcna\_ d1agja\_ d1os8a\_ d1hpga\_ d1p3ca\_ d1qtfa\_ d1e69a\_  
d1mv5a\_ d3g60a4 g1ii8.1 d1ewqa2 d1ji0a\_ d1qhla\_ d1v43a3 d2wmfa1  
d1vpla\_ d1g2912 d4a82a2 g1f2t.1 d2d62a1 d3tuic1 d2bbsa1 d3g60a3  
d2ixea\_ d1g6ha\_ d1sgwa1 d2qi9c\_ d3rlfa1 d3b60a1 d3d31a2 d2pzea1  
g1xew.1 d1jj7a\_ d1oxxk2 d2onka1 d1wlwa\_ d1iwea\_ d1qf5a\_ d1vmaa2  
d1nija1 d1np6a\_ d2p67a1 d3ihla\_ d1okkd2 d1ls1a2 d1s1ma2 d1iona\_  
d2v40a\_ d1dj3a\_ d3hida\_ d2vo1a1 d2g0ta1 d1vcoa2 d1j8mf2 d1g3qa\_  
d1xjca\_ d1p9ba\_ d1qzxa3 d1ihua2 d1ihua1 d2qm8a\_ d1dj2a\_ d4ioja\_  
d1cp2a\_ d1yrba2 d3gqba2 d1skye3 d1xp8a1 d1tf7a2 d1tf7a1 d1ye8a1  
d1skyb3 d2qe7d2 d4blta\_ d4huta\_ d3l1daa2 d4hyya\_ d2i3ba1 d1cr1a\_  
d3j9tb2 d3ntua2 d1vdza1 d2z43a\_ d1e9ra\_ d1nlfa\_ d3ziaa2 d1n0wa\_  
d3ziad2 d3j9ta2 d1pzna2 d3gqbb2 d2i49a\_ d1nnfa\_ d1xvxa\_ d1ursa\_  
d1h3da1 d1iuda\_ d4m1va1 d1twya\_ d3e13x\_ d2nxoa1 d4pfua\_ d3ttma\_

d1elja\_ d2qmwa1 d1us5a\_ d1y3na1 d1jeta\_ d1uqwa\_ d4f19a1 d2esna2  
d3thia\_ d3fasa1 d2uyeb\_ d2xwva1 d1r9la\_ d2fyia1 d2ozza1 d1sw5a\_  
d1nh8a1 d1vr5a1 d2g29a\_ d1xs5a\_ d3lswa\_ d2z23a\_ d3w9va\_ d3tcha\_  
d1q35a\_ d1z7me1 d3q27a\_ d1p99a\_ d1ve4a1 d2i6ea1 d4mcoa1 d4n8ya\_  
d1eu8a\_ d1zbma1 d1hsla\_ d1ixca2 d1j1na\_ d1xvya\_ d1y9ua\_ d2z22a1  
d1xoca1 d4oera\_ d1wdna\_ d5f1qa1 d1xt8a1 d1i6aa\_ d4gwoa\_ d4igta1  
d1pc3a\_ d4mmpa1 d1o63a\_ d2cz1a1 d2onsa2 d4mija1 d1eh3a\_ d3skpa\_  
d1dtza1 d1ieja\_ d1jnfa2 d1ce2a1 d1jnfa1 d1b1xa2 d1b1xa1 d1jw1a1  
d1jw1a2 d1ryoa\_ d1h76a1 d1h76a2 d1c4oa1 d2p6ra3 d2p6ra4 d1oywa2  
d1oywa3 d1wrba1 d1w36b2 d1w36b1 d1c4oa2 d3bora\_ d1t6na\_ d2eyqa5  
d2eyqa3 d2eyqa2 d2zu6a2 d1veca\_ d1uaaa1 d1w36d1 d2g9na1 d1z3ix2  
d2rb4a\_ d1hv8a1 d1hv8a2 d1t5ia\_ d1w36c2 d2j0sa2 d2j0sa1 d1fuka\_  
d3hjha1 d1z5za1 d1qdea\_ d1z63a1 d1s2ma2 d1s2ma1 d1wp9a1 d1wp9a2  
d1gm5a3 d1gm5a4 d3dina4 d3dina3 d1q0ua\_ d1w36c1 d1z3ix1 d1nkta3  
d1uaaa2 d1w36d2 g1qhh.1 d2fwra2 d2fwra1 d3q3ma\_ d1za0a1 d1mxra\_  
d2inca\_ d1jk0a\_ d2incb\_ d3hf1b\_ d1mtyb\_ d1r2fa\_ d2uw1a\_ d1mhyd\_  
d3n37a\_ d1afra\_ d1oquc\_ d1syya\_ d1mtyd\_ d2o1za\_ d1uzra\_ d1smsa\_  
d2fkza\_ d1zuja1 d1s3qa1 d2fjca1 d1z6om1 d1veia\_ d4dyya\_ d1jiga\_  
d3gvya\_ d2pyba\_ d4cy9a1 d3bvfa1 d1r03a\_ d2cf7a\_ d1nf4a\_ d1zs3a1  
d4iwka\_ d3ka8a\_ d3np0x\_ d1n1qa\_ d1l1b3a\_ d4e6ka\_ d1z6oa1 d2fzfa1  
d4dyua\_ d3ge4a\_ d1jgca\_ d4am4a\_ d2z6ma\_ d1ji5a\_ d1vlga\_ d1lkoal  
d3qz3a\_ d1o9ra\_ d2ffxj\_ d1euma\_ d1yv1a1 d2v2pa\_ d1j30a\_ d4di0a\_  
d1dpsa\_ d2cbia2 d2choa2 d1l8na1 d1oewa\_ d2qzxa\_ d2asia\_ d1psoe\_  
d1smra\_ d2h6ta\_ d1pfza\_ d1lizda\_ d3hd8a\_ d1j71a\_ d1dpja\_ d4aa9a\_  
d1t6ex\_ g1b5f.1 g1lya.1 g1htr.1 d1qdma2 d1bxoa\_ d1wkra\_ d1tzsa\_  
d1libqa\_ d2qzwa\_ d1zoya1 d1qo8a2 d1d4ca2 d1chua2 d1kf6a2 d1bdqa\_  
d3ggta\_ d3ixoa\_ d1mrx\_ d2haha\_ d1tw7a\_ d4njsa\_ d1sgua\_ d2p3da\_  
d1nsoa\_ d3d3ta\_ d2rkfa\_ d1c6ya\_ d2rspa\_ d3ogpa\_ d3ekwa\_ d2o4na\_  
d2j9ja\_ d1baia\_ d3ggua\_ d3lzua\_ d4npua\_ d4j55a\_ d2r8na\_ d2fxda\_  
d2p3ca\_ d4dqea\_ d3ttpa\_ d3t3ca\_ d2p3aa\_ d2hc0a\_ d2fdda\_ d3mwsa\_  
d3rcha\_ d3k40a\_ d1pmma\_ d1k8rb\_ d1wgra1 d1ef5a\_ d1wfy1 d1e8ya3  
d1wgya1 d2cs4a1 d1wxma1 d2byea1 d3kh0a1 d2byfa1 d1wxaa1 d1e7ua3  
d1h4ra3 d4y18a1 d2a16a3 d1wgda1 d1wgga1 d4q5eb\_ d1wjna1 d1se9a\_  
d3n3kb\_ d1wz0a1 d1we6a1 d2m0xa\_ d2gbka\_ d3rt3b1 d1wh3a1 d1sifa\_  
d2ekec2 d4ii2b1 d4hk2a1 d1c3ta\_ d1m94a\_ d1wgha1 d1ttna1 d1wx8a1  
d3v6cb1 d2ma9b\_ d4i61b1 d1bt0a\_ d2jvca1 d1iyfa\_ d2k1fa\_ d1wxva1  
d1wf9a1 d1t0ya\_ d2io0b2 d1x1ma1 d2gbma\_ d1zw7a1 d2m17a\_ d1ud7a\_  
d1we7a1 d2lwp\_ d2gджа\_ d1wjua1 d1v6ea1 d1v86a1 d4eewa\_ d1wiaa1  
d4icva\_ d4gu2a\_ d1wx7a1 d1wy8a1 d4hjka1 d2faza1 d1v5oa1 d3ruib\_  
d1eo6a\_ d3waob\_ d2r2qa1 d3m95a\_ d3wana\_ d2h1ia1 d2r8ba1 d3b5ea1  
d3cn9a\_ d1auoa\_ d4lu0a\_ d1of8a\_ d3unda1 d3e9aa1 d1vr6a2 d1n8fa\_  
d2qkfa\_ d1o60a\_ d2h0ba\_ d2erfa\_ d1h30a2 d1h30a1 d3mw4a1 d1pz7a\_  
d2r1ba\_ d3v64a1 d1d2sa\_ d3bopa1 d3mw3a1 d1okqa2 d1iyka2 d1iyka1  
d1rxta1 d1iica1 d1dszb\_ d1a6ya\_ d3cbba\_ d1ynwa1 d1r4ia\_ d1hcqa\_

d2hana\_ d2hanb\_ d2enva1 d1kb4b\_ d2n11b\_ d1l01a\_ d1cita\_ d1um8a\_  
d1ixza\_ d1qvra2 d1qvra3 d1qzma\_ d1sxjc2 d1jr3d2 d2p65a\_ d1l8qa2  
d1g8pa\_ d3hu3a3 d1sxjd2 d1njfa\_ d1in4a2 d1sxja2 d1tuea1 d2ce7a2  
d1w5sa2 d1sxjb2 d1d2na\_ d1ny5a2 d1ofha\_ d2gnoa2 d2a5yb3 d1fnna2  
d1u0ja1 d1lv7a\_ d2fnaa2 d1ixsb2 d4gita\_ d1sxje2 d1g41a\_ d1svpa\_  
d1mbma\_ d3su6a1 d1cu1a1 d4agka\_ d1vcpa\_ d1q31a\_ g1n11.1 d3e90b\_  
d1ep5a\_ d3ul1jb\_ d2e3fa\_ d1mm0a\_ d2e3ea\_ d2l1da\_ d2ny8x\_ d2e3ga\_  
d2ny9x\_ d2nz3a\_ d2l1j7a\_ d1n4na\_ d2m8bb1 d2kyqa\_ d3psma\_ d1jkza\_  
d1jxca\_ d2g11a\_ d1ug1a\_ d4uj0a\_ d2k4ua\_ d1hp2a\_ d2lu9a\_ d1baha\_  
d2meoa1 d1wm7a\_ d1h1ya\_ d1n8ma\_ d1jlza\_ d1wpda\_ d1c55a\_ d1pvza\_  
d1wt7a\_ d1rjia\_ d1wz5a\_ d1m2sa\_ d1pjva\_ d1c49a\_ d1qkya\_ d2ktca1  
d1wmta\_ d1j5ja\_ d1r1ga\_ d1t61c1 d1iyjb4 d1iyjb5 d1iyjb3 d1o7ia\_  
d4ipca1 d1x3ea\_ d4apva\_ d1jb7a1 d1jb7a2 d1jb7a3 d3kdfa\_ d1uelb\_  
d1wjja1 d3eiva\_ d1xjva2 d1xjva1 d2ccza2 d1se8a\_ d1l1loc\_ d1jb7b\_  
d1qvca\_ d3ulla\_ d1qzga\_ d1miua4 d1miua5 d1miua3 d3g48a1 d1gd7a\_  
d1mkha\_ d1jjcb3 d1pyba\_ d1y14b1 d2nn6i1 d1i94l\_ d2zjra2 d1smxa\_  
d2qamc2 d1hh2p1 d2r7da1 d1r12a2 d1wfga1 d3bzka4 d1x6oa2 d3a0ja\_  
d2j01d2 d2ja9a1 d4q15a\_ d1hr0w\_ d1luza\_ d2n3sa\_ d2vnud1 d1h95a\_  
d1go3e1 d2nn6h1 d1ne3a\_ d2mo1a\_ d1iz6a2 d1jjga\_ d1e3pa2 d2ix0a3  
d2ix0a2 d2lxja\_ d1ueba3 d1ueba2 d2z0sa1 d1u01a1 d2ix0a1 d2eifa2  
d2je6i1 d3i2za1 d2c35b1 d2ahob2 d1t9ha1 d3i4oa\_ d2qall1 d1jt8a\_  
d2nn6g1 d1g6pa\_ d3cama\_ d1i94q\_ d1c9oa\_ d1d7qa\_ d2ba0a1 d2vnud2  
d2vnud3 d1khia2 d2qalq1 d1wi5a1 d1xtda2 d1ny4a\_ d1rpma\_ d2shpa1  
d1yfoa\_ d1l8ka\_ d2ooqa1 d1g4us2 d1lara2 d1lara1 d1wcha\_ d2fh7a2  
d2fh7a1 d1ohea2 d2f4da\_ d1rxda\_ d2hxpa\_ d1xria\_ d1d5ra2 d1fpza\_  
d3ezza\_ d4y2ea\_ d1i9sa\_ d3azya\_ d3wvja\_ d1upsa1 d1ajoa\_ d2hyka\_  
d1ajka\_ d2vy0a\_ d1o4ya\_ d3o5sa\_ d3d6ea\_ d3atga\_ d1dypa\_ d1umza\_  
d3i4ia\_ d1c11a\_ d41bqa\_ d1a78a\_ d1slta\_ d4no4a\_ d3zsja\_ d3duia\_  
d1g86a\_ d1is3a\_ d1hlca\_ g1qmo.1 g1len.1 d3zyra\_ d1fnya\_ d1n47a\_  
g21tn.1 d1avba\_ d3usua\_ d1dhkb\_ d1f9ka\_ d1lukga\_ d1g8wa\_ d1g9fa\_  
d3wcsa\_ d1g7ya\_ g1loe.1 d1mvqa\_ d1hq1a\_ d1v6ia\_ d1dbna\_ d1qnwa\_  
d1fx5a\_ d4l8qa\_ d1ioaa\_ d3n35a\_ d3ubra\_ d1qo8a1 d1d4ca1 d2k3va\_  
d1ft5a\_ d1qdba\_ d1m1qa\_ d2j7aa\_ d1h21a\_ d1ogyb\_ d4fasa\_ d1jnia\_  
d1sp3a\_ d1eysc\_ d3h33a\_ d1rwja\_ d1os6a\_ d3bxua\_ d3h4na\_ d1i77a\_  
d3caoa\_ d1j0pa\_ d2ctha\_ d1duwa\_ d1ofwa\_ d2e84a\_ d1hh5a\_ d1gyoa\_  
d3h34a\_ d1wioa4 d1vcaa1 d1dr9a2 d1ic1a1 d2d9qb1 d2nxyb2 d2dara2  
d2dara1 d1wyha2 d2dloa2 d1rutx4 d1rutx3 d2cuqa2 d1x41a2 d1x41a1  
d1x3ha2 d1x3ha1 d2d8za1 d1x61a2 d1x6aa1 d1x6aa2 d2cora2 d2cora1  
d1v6ga1 d1v6ga2 d2d8za2 d1x64a1 d1x64a2 d1b8ta1 d2co8a1 d1x63a2  
d2dj7a2 d2dj7a1 d2cu8a2 d2cu8a1 d1g47a2 d1g47a1 d1j2oa1 d1wyha1  
d2dloa1 d1wiga1 d1wiga2 d2cupa2 d2cupa3 d1x68a1 d2d8ya2 d2d8ya1  
d1m3va2 d1x62a1 d1x68a2 d1x61a1 d1b8ta3 d1b8ta2 d2d8xa2 d2d8xa1  
d1x4ka1 d1x4ka2 d2cuqa1 d1m3va1 d2co8a2 d1j2oa2 d1x63a1 d2cura1  
d2cura2 d1x62a2 d1op9a\_ d1y01a1 d1letzb1 d1egj11 d2gsib1 d1nj9a1

d4jfhd1 d1aqk11 d1t2ja\_ d1lo4h1 d1zvya1 d3v4v11 d4enec1 d1kxtb\_  
d5e8ea1 d2pxya\_ d4weud\_ d1xiwc\_ d2esvd1 d1qnzh\_ d1logae1 d1f4xh1  
d4n1hb\_ d3ezjb1 d3mlw11 d1kfah1 d1letza1 d1b4jh1 d3cfic\_ d4w68a\_  
d2arja1 d1ek3a\_ d2ok011 d1vera\_ d1uwgh1 d1blnb1 d1fpth1 d1rzga1  
d2giya1 d4m3kb1 d1nc2a1 d2nyyd1 d1ncna\_ d1fbih1 d5dxwa\_ d4fqqa1  
d1dqdh1 d1jfq11 d1kelh1 d1faih1 d1frgl1 d1figl1 d4m6n11 d1fo0a\_  
d4hxb11 d3b5ga\_ d3quyd1 d2h9gb1 d1i8kb\_ d2dd8h1 d2ck0h1 d1eaja\_  
d4w6wb1 d2a6ib3 d1t66d1 d2e27h\_ d1ob1b1 d1f11b1 d2v7na1 d1ad0a1  
d2xt1b1 d1pskh1 d4i13b1 d2op411 d1a0q11 d1uwell1 d1za3a1 d1ncb11  
d4uu9a\_ d1bm3h1 d1cloh1 d1nqba2 d1cf8h1 d4y5va\_ d1mhph1 d5anma1  
d4cdgc1 d4ldeb\_ d1y0lb1 d2pcpb1 d1z3gl1 d1dfb11 d1fh5h1 d3g5xa1  
d1tzib1 d4dn311 d3zhka1 d2b1hh1 d2uyla1 d1f3dh1 d1nj9b1 d2agjh1  
d2h1p11 d1q72h1 d8fab11 d1ndmb1 d1rjca1 d4u6hb1 d3upca\_ d2fbj11  
d1osph1 d1tvda\_ d2cjev\_ d4fhbd1 d1bd2d1 d1rz7h1 d3nn8a\_ d1knoa1  
d1nfda1 d2bmkb1 d1dq11\_ d1igyb1 d1igf11 d12e8h1 d3utza1 d1nc2b1  
d1rihh1 d4mwfb1 d4jvpa1 d1mieh1 d1rhfa1 d1fgn11 d1sbsh1 d1lp9e1  
d1dn0a1 d4lqf11 d1iaih1 d1kgcd1 d1mh5b1 d1gpol1 d2g60h3 d1f8t11  
d2jixd1 d4grwh\_ d1fo0b\_ d1bfob1 d1axsa1 d1u9ka\_ d1nmbh\_ d1h8na1  
d1h8na2 d1jguh1 d4eura1 d3sdy11 d35c8h1 d1w7211 d1mvub\_ d1i9rh1  
d1ob1a1 d4wenb\_ d1yeeh1 d3ietc1 d1f58h1 d1ad0b1 d1mqk1\_ d1nbvh1  
d4b50a\_ d3r8bb\_ d1baf11 d1mamh1 d4rgne1 d2gsgb\_ d35c811 d1bafh1  
d1ailh1 d2pcpa1 d2fath1 d2x1pa\_ d1orsb1 d1ibgl1 d1shma\_ d1a2yb\_  
d1u0qa\_ d2coqa\_ d1hilb1 d1qfwi\_ d1jv5b\_ d1fn4b1 d5e0qa\_ d1nsh11  
d1plgl1 d4ocx11 d1kb5h1 d1rzfh1 d1pg7x1 d2fx7h1 d2oi9c\_ d1l7i11  
d3eyva1 d1d5i11 d4ffyl\_ d1tet11 d1a6wh\_ d1lac6a\_ d3dvfa\_ d1nfde1  
d1mimh1 d1ri8a1 d1jhlh\_ d3dura\_ d1fskb1 d1f97a1 d3so3b1 d2ak4d1  
d1lp9f1 d4z7wf1 d1l7th1 d4y5ya\_ d4x7ec1 d1emth1 d1ikf11 d1nlbh1  
d4utal1 d1bjma1 d1eapb1 d1u6ah1 d2dtgd1 d1kj2b\_ d1xeda1 d1c1eh1  
d1fgvh\_ d2bnub1 d2fb4h1 d2dtgb1 d1ktrh\_ d1jpth1 d1qkz11 d4hepg\_  
d2atpb1 d1flrh1 d2hrp11 d1mvfa\_ d1iaim1 d3k80a1 d2jb5h1 d3zkxc\_  
d4grwe\_ d1it9h1 d1rhhb1 d3w9ec\_ d1e4wh1 d1sy6h1 d2j6eh1 d3qxta\_  
d1jglh1 d1p7ka1 d1tzhb1 d4n8pa1 d1gaf11 d2jelh1 d1wioa2 d4i0cc1  
d1cicb1 d1lmka2 d1lmka1 d1iqwh1 d1orqb1 d1ejoh1 d1jnlh1 d4zga1\_  
d43c9b\_ d1ggbl1 d1wejh1 d3q6fa1 d1f3dj1 d3c6la1 d1bqlh1 d3p9wb\_  
d1a3r11 d1h0db1 d2uzil\_ d1eo811 d1qfw1\_ d1n7m11 d1igja1 d1c5ch1  
d2a9mh\_ d1rmfh1 d1fj1b1 d4heme\_ d1ccza1 d1a5fh1 d1logad1 d1dlfh\_  
d1qa9b\_ d1vgel1 d3qskb\_ d1sjxa\_ d4ozfg1 d1sq2n\_ d1qd0a\_ d1kcvh1  
d1c5db1 d3qcul1 d8faba1 d3bn9d1 d1mjuh1 d4y8dc\_ d7fabh1 d3dvgb1  
d1lo011 d1a6tb1 d1gigh1 d1kcrh1 d2hwz11 d1yjdc1 d3clfl1 d4krna\_  
d1dl71\_ d1e6o11 d1mexh1 d3r0ma\_ d4kkna\_ d1fns11 d1oaqh\_ d1rzia1  
d1ucbh1 d1ncw11 d4b41a\_ d1nfd11 d2mpah1 d2d7t11 d4grwf\_ d4b5ea\_  
d1lk3h1 d3u79a\_ d4u3xa\_ d1ghf11 d1bvkb\_ d1mcww1 d1b88a\_ d1jrhh1  
d32c2b1 d4wemb\_ d1dsfh\_ d1op3h1 d1ce111 d1iqda1 d1qoka1 d1qoka2  
d1qfuh1 d2crya1 d1ay1h1 d1oaql\_ d3ab0b\_ d1rur11 d1t4kb1 d1bz7b1

d1n0xh1 d1for11 d1lucb11 d4w6yb\_ d43c9a\_ d2aab11 d1tzia1 d4n1ca\_  
d1k6qh1 d3g9ab\_ d4tvsa1 d1ligmh\_ d1pz5b1 d3dx9a1 d3wxwh\_ d1nakh1  
d1kcu11 d3eaka\_ d4qlra1 d1cr9l1 d1d9ka\_ d1f4xl1 d1deea1 d2i27n2  
d1c12a1 d2orbl1 d1j8hd1 d1mcph1 d1c5da1 d1kenh1 d1bd2e1 d1h5ba\_  
d4x7fc1 d3upaa\_ d1t3fa1 d1indh1 d2dtgc1 d4hc111 d1zv5a1 d4wgvb\_  
d1uwg11 d4f37k1 d1aqkh1 d1vesa\_ d3zkqd\_ d1fpt11 d1lo4l1 d1knob1  
d3rrqa\_ d1ct8b1 d4orz\_ d1mlbb1 d4hgkc1 d1dqdl1 d1bogb1 d4ozhe1  
d1dr9a1 d1i7za1 d1dn0b1 d1kell1 d1rzi11 d1ypzf1 d1wtla\_ d1hkfa\_  
d1fail1 d1figh1 d2vyre\_ d1sjva\_ d1ohqa\_ d1bfoa1 d1pkqb1 d1mjul1  
d1b4j11 d1nsl1 d2arjb1 d1p4bh\_ d4aj0a\_ d3nn8b\_ d2rcja1 d1f2xk\_  
d4v1dd\_ d1adqh1 d2eksa\_ d4k3ga\_ d1jfqh1 d1uweh1 d1frgh1 d4gftb\_  
d1uz8b1 d4n1ea\_ d1bm3l1 d1clol1 d3mcka1 d2vq1a1 d1ae6h1 d4aq1b1  
d1uj3b1 d1nbqa1 d1fh5l1 d2ck0l1 d2ywza\_ d1q72l1 d4nbxb\_ d1hila1  
d4hz1b1 d2j88l1 d1zmya1 d1cd0a\_ d1a4ka1 d1psk11 d1a0qh1 d4krmb\_  
d1ncbh1 d2fbjh1 d1j8he1 d1i3ua\_ d1cf8l1 d1fe8h1 d2plya1 d1eeqa\_  
d2x89a\_ d1ol0a\_ d2r0lh1 d1ub5a1 d1dfbh1 d3eyvb1 d4jdvb1 d4p2cg\_  
d2gsia1 d2agj11 d1u3ha1 d2h1ph1 d1rih11 d1fskc1 d1boga1 d2a77l1  
d1osp11 d1qfoa\_ d3dwta\_ d2fx7l1 d1rz7l1 d3stba1 d1pkqa1 d1b6da1  
d1dzba2 d1dzba1 d1kj2a\_ d4l1ha\_ d1rzgb1 d1dqlh\_ d12e8l1 d1miel1  
d1jmaa\_ d1sbs11 d1fgnh1 d1f58l1 d1mqkh\_ d1ndgb1 d3qegl1 d1iaii1  
d2aw2a1 d1tqbc1 d3fo2a1 d4dkaa\_ d1f8th1 d2g60l1 d2ywy\_ d1uj3a1  
d1yc7a\_ d3bd3a\_ d4w6xb1 d1nmb1\_ d1i8ka\_ d1rjlb1 d1ypze1 d1p7kb1  
d1kxqe\_ d1gpoh1 d2z4qa1 d1w72h1 d1i9rl1 d4qgya1 d4xt1c\_ d2qqnh1  
d1cica1 d3c08h1 d2cd0a\_ d2bdnh1 d1hnga1 d1mam11 d1nldh1 d1cr9h1  
d4lcih1 d3bkyh1 d3qg7l1 d1ai1l1 d1kxvc\_ d4iosd\_ d1l7ih1 d2x1qa\_  
d1ub6b1 d3k74b\_ d1ibgh1 d1teth1 d1lgya1 d1hxma1 d2x6ma\_ d2e7la\_  
d5e03a\_ d1qfwm\_ d2r0kh1 d1lign1 d1rurh1 d1plgh1 d1mj8h1 d1yuhb1  
d3fmg11 d1rzfl1 d1emt11 d1ad9b1 d1lign1 d1nlb11 d1d5ih1 d3k7ua\_  
d4ffyh\_ d1bwva\_ d3dvga1 d1a6ta1 d1fgvl\_ d4qxgl1 d1mim11 d1jh11\_  
d2hffb1 d2hh0l1 d1qkzh1 d1l7tl1 d1afvh1 d1iaiii1 d2cjuh\_ d1um5h1  
d2ghwb2 d2ghwb1 d1kgce1 d2fgwh1 d1likfh1 d1dvfd\_ d2i24n1 d2xtjb\_  
d1za3b1 d2yc1a\_ d2hh0h1 d2x1oa\_ d1bvka\_ d1rjla1 d5e7ba1 d1lign1  
d1i11b1 d2fb4l1 d1mvua\_ d1jpt11 d32c2a1 d1fvca\_ d1iqdb1 d2hrph1  
d2p4ab\_ d4qo1a\_ d1p2cb1 d1wt5c\_ d1t4ka1 d5c1mb\_ d1it9l1 d1bz7a1  
d1b2wh1 d1e4wl1 d1jnl11 d1yedb1 d1za6b1 d3u7aa\_ d1lign1 d3gnml1  
d1orsa1 d1wejl1 d1a2ya\_ d1hxmb1 d1gafh1 d2j4wh1 d1pz5a1 d1j05a\_  
d1a3rh1 d4fq1l1 d1qfwh\_ d1eo8h1 d1n7mh1 d4s11a\_ d1kegh1 d5da4a\_  
d1iqw11 d3whxb1 d1vgeh1 d1deeb1 d1c12b1 d1t2ql1 d1ad9a1 d3gsnb1  
d3b2uc1 d1ggbh1 d1t3fb1 d1nak11 d4ocmc\_ d1lila1 d2v7hb3 d2esve1  
d1mcoh1 d2qr0b1 d2q3aa\_ d1ct8a1 d1kcr11 d2pxyb\_ d2uzih\_ d5c3ld\_  
d3durb\_ d1c5c11 d2ak4e1 d1dl7h\_ d1xiwd\_ d1mlba1 d1rmfl1 d1i7zb1  
d1dlfl\_ d2xa3a\_ d5bq7b1 d1dqqb1 d3h42l1 d1legjh1 d1kcv11 d1fe8l1  
d2j6e11 d1f3rb2 d1l1k3l1 d1sm3h1 d1q0xh1 d1ghfh1 d7fab11 d1lign1  
d1lo0h1 d4idla\_ d5c2bl\_ d1jrh11 d1lila1 d3zhda1 d4kfcz\_ d1b0wa\_

d1e6oh1 d1mexl1 d4krpb\_ d1fnsh1 d1ncwh1 d4hgma\_ d4eigb1 d4rzca\_  
d2mpal1 d4y5xa\_ d5en2b1 d3lrga1 d4ejlc1 d1rhha1 d1j05b\_ d1forh1  
d1q9wb1 d2wzpd\_ d2aq2a1 d1h0da1 d3revb1 d2ij0c1 d1tzh1 d4m7j11  
d1k6ql1 d3b9kc1 d1igml\_ d3qeua1 d1dsfl\_ d1ce1h1 d1kcuh1 d1zvha1  
d1zvoa1 d1tqbb1 d1ay1l1 d2qsc11 d2cgrh1 d1n10h1 d1ken11 d3eo0a1  
d4n9ob1 d1n0x11 d3k1kc\_ d1c4qa\_ d1prtc1 d2wv6d\_ d1prtf\_ d1ltrd\_  
d4l63b1 d1r4pb\_ d1t10f\_ d2bosa\_ d1prtb1 d3chbd\_ d2aq2b1 d1ck1a1  
d1enf1a1 d1i4pa1 d1v1oa1 d1et9a1 d1esfa1 d2g9hd1 d4ohja1 d1bxta1  
d1eu3a1 d1ty0a1 d1fnua1 d2qaln1 d2cqva1 d1fhga\_ d2k1ma\_ d2dl2a1  
d1biha3 d1biha1 d1biha4 d3qp3a1 d1g1ca\_ d1cvsc2 d1cvsc1 d1xmwa2  
d1m4ka2 d2otpa2 d1biha2 d1rhfa2 d2fcba2 d2fcba1 d1wwbx\_ d1gsma2  
d1epfa1 d1epfa2 d2dava1 d1waaa\_ d1f97a2 d1x44a1 d1vcaa2 d1fnla2  
d1fnla1 d3b5ha2 d3h8na2 d3h8na1 d1jbj1a1 d1jbj2a1 d1pd6a\_ d1f2qa2  
d1f2qa1 d3cx2a\_ d1nbqa2 d3b5ha1 d1n26a1 d1xiwb\_ d1xaua\_ d1fltx\_  
d2ifga1 d1olla1 d1olla2 d1cs6a4 d1cs6a3 d1cs6a2 d1cs6a1 d2gw5a2  
d1sy6a1 d1xiwa\_ d1lucta2 d1lucta1 d1ry7b2 d1gl4b\_ d1qz1a3 d1olza1  
d2c9aa1 d1wwca\_

**Family-84 (d.15.4.2)**

**Positive dataset contains 5 protein sequences.**

d3nvv1a1 d2h88b1 d1t3qa2 d1zoyb1 d1rm6c2

**Negative dataset contains 3955 protein sequences.**

d1m32a\_ d1libja\_ d1c7na\_ d1iuga\_ d4q75a\_ d2bkwa1 d1t3ia\_ d1n8pa\_  
d1qz9a\_ d1jff9a\_ d1leg5a\_ d1p3wa\_ d3kgwa\_ d1c11a\_ d2ctza1 d1vjoa\_  
d2rfva\_ d1gc0a\_ d1cs1a\_ d1d2fa\_ d2ch1a1 d1qgna\_ d1pffa\_ d1c7ga\_  
d2v1pa1 d2ez1a\_ d1u08a\_ d1l1c5a\_ d1b5pa\_ d2ay1a\_ d1bw0a\_ d3pd6a\_  
d7aata\_ d2csta\_ d1j32a\_ d4wlha\_ d1o4sa\_ d1v2da\_ d1gdea\_ d1m6sa\_  
d1v72a1 d1svva\_ d1ajsa\_ d1wsta1 d2f8ja2 d1l1k9a\_ d1vp4a1 d1xi9a1  
d2gb3a1 d1yaaa\_ d3i2ka1 d1l1nsa3 d1mpxa2 d1rmka\_ d1ixta\_ d1leyoa\_  
d1cnna\_ d1fu3a\_ d1g1pa\_ d1f3ka\_ d1fyga\_ d1cixa\_ d1y29a\_ d1v7fa\_  
d2jtb1a\_ d1d1ha\_ d1g9pa\_ d1lupa\_ d1qk7a\_ d1mb6a\_ d2a2va\_ d1niya\_  
d1i25a\_ d1hvwa\_ d2mpqa\_ d1ie6a\_ d1kqha\_ d1la4a\_ d2mxoa1 d1koza\_  
d1qk6a\_ d1emxa\_ d1lqra\_ d1c6wa\_ d1f56a\_ d1bypa\_ d1azca\_ d1ws8a\_  
d3u25a\_ d1cuoa\_ d1id2a\_ d1rkra\_ d2iaac\_ d4dp1x\_ d1nwpa\_ d2gima\_  
d2i7sa\_ d1qhqa\_ d3ehbb1 d1fftb1 d1gyca3 d1hfua2 d1kbva1 d1kbva2  
d1sdda1 d1sdda2 d1gyca1 d1gyca2 d1mzya1 d2bw4a1 d1laoza1 d1laoza3  
d1laoza2 d1kyaa2 d1kyaa3 d1mzya2 d4e9sa1 d1sddb1 d1sddb2 d1hfua1  
d1hfua3 d1oe1a2 d1oe1a1 d1v10a2 d1v10a3 d1v10a1 d2cfba1 d1dfoa\_  
d1o69a\_ d1bj4a\_ d3k28a\_ d2bwpa\_ d3lg0a\_ d2fnua\_ d3ou5a\_ d1z7da1  
d1b9ha\_ d1liaya\_ d4msoa\_ d1bs0a\_ d1s0aa\_ d1sffa\_ d3tqxa\_ d1mdoa\_  
d3qboa\_ d3pgya\_ d1bjna\_ d2dkja\_ d1ejia\_ d1vefa1 d4wxga\_ d3bs8a\_  
d3gbxa1 d1w23a\_ d1iknc\_ d3brda1 d1p7h11 d1oy3c\_ d1imhc1 d1gjia1  
d1zk9a1 d2cxka1 d2bema\_ d1pama1 d1ea9c1 d1qhoa1 d2fhfa2 d2fhfa1  
d1k3ia1 d1j0ha1 d1cxla1 d2bhua1 d1ledqa1 d1f1sa2 d1lut9a2 d1gvia1  
d1txka1 d1zx5a1 d2phla2 d2phla1 d1fxza2 d1lrha\_ d1uija1 gldgw.1

d2v09a\_ d1uika2 d1uika1 d1dgwa\_ d2pa7a1 d1wlta1 d1nxma\_ d2c0za1  
d1nepa\_ d1ds6b\_ d1fstb\_ d1g0da1 d3us3a3 d3us3a1 d4mh8a\_ d1mu2a2  
d4i7ga1 d1tafa\_ d1bh9b\_ d1jfib\_ d1q9ca\_ d1h3ob\_ d2byka1 d1n1ja\_  
d4g92b\_ d1bh9a\_ d1jfia\_ d1h3oa\_ d2bykb1 d1n1jb\_ d2bjca1 d2hsga1  
d1qpza1 d1efaa1 d2ovga\_ d1sq8a\_ d1rzsa\_ d3kz3a\_ d3orca\_ d3gpdg2  
d2q49a2 d1hdgo2 d2g17a2 d2cvoa2 d2czca1 d3pwka2 d1obfo2 d1i32a2  
d1zyao2 d2pkqo2 d1b7go2 d2hjsa2 d1cf2o2 d1vkna2 d1nvmb2 d2m9wa1  
d3dfxa\_ d2msya\_ d2djoa1 d2r5za\_ d1au7a1 d1f43a\_ d21mda1 d1akhb\_  
d1s7ea1 d3nara\_ d1zq3p1 d2craa1 d1mija\_ d4uuta\_ d3a01a\_ d1x58a1  
d3rkqa1 d3cmya1 d2cqxa1 d2da6a1 d1e3oc1 d1fjla\_ d1mh3a1 d1ig7a\_  
d1x41a1 d1wh7a1 d1gt0c1 d2mw8a\_ d1lfup\_ d1x2ma1 d1b72a\_ d1wi3a1  
d1jgga\_ d1wjha1 d1x2na1 d1mnm\_ d2cuea1 d3k2aa\_ d2hosa\_ d2jwta2  
d1pufa\_ d1octc1 d2hi3a\_ d1b8ia\_ d4j19a\_ d3lnqa\_ d1wh5a1 d1b8ib\_  
d1tc3c\_ d1gdta1 d1u78a2 d6paxa1 d6paxa2 d1k78a2 d1hlva1 d1hlva2  
d1iufa2 d1iufa1 d1b10a1 d1d5ya1 d1d5ya2 d1prtc2 d3lv8a\_ d1s3ga1  
d1zaka1 d1s4qa\_ d3tvta2 d1uf9a\_ d1khta\_ d1ckea\_ d1losna\_ d1p5zb\_  
d3cm0a\_ d1tmka\_ d1jaga\_ d3h86a\_ d1t0hb\_ d1nn5a\_ d2h92a\_ d3kb2a1  
d2c95a1 d1yj5a2 d1kgda\_ d1ly1a\_ d2ak3a1 d1vyva2 d1deka\_ d2grja1  
d1p3ja1 d1y63a\_ d1e4ya1 d1s96a\_ d3iija1 d1lvga\_ d1nksa\_ d1vyua2  
d4e22a\_ d1qf9a\_ d1jjva\_ d1q3ta\_ d1ki9a\_ d1lw7a2 d1teva\_ d1kjwa2  
d1gsia\_ d1g3ma\_ d1j99a\_ d1t8ta1 d1nsta\_ d1fmja\_ d1zrha\_ d1ls6a\_  
d2a3ra\_ d1aqua\_ d2zptx\_ d3ckla\_ d1teta\_ d1q44a\_ d2gwha\_ d1odfa\_  
d1uj2a\_ d4gi7a\_ d2jeoa1 d1z0ja1 d3umra2 d3gj0a1 d2gaoa1 d1yzga1  
d1x3sa1 d1g7sa4 d1puja\_ d1udxa2 d1kk1a3 d2o52a\_ d1jwyb\_ d1zcaa2  
d1zcba2 d2fv8a1 d2cjwa\_ d3dz8a1 d1xzpa2 d1vg8a\_ d4qxaa\_ d2ew1a1  
d1x1ra1 d2bcgy\_ d3doea1 d3cona\_ d3rega\_ d3wyga\_ d1upta\_ d2b6ha1  
d1zd9a1 d1lnza2 d1r5ba3 d1n0ua2 d1r2qa\_ d2f91a1 d2rhda\_ d3q3jb\_  
d3q85a\_ d1efma1 d1r8qa\_ d2gf9a1 d2akab1 d1ek0a\_ d1z08a1 d2gcoa1  
d2dyla2 d4g01b\_ d2cxa1 d1svia\_ d3q72a\_ d1ni3a1 d4ac9a4 d2erxa1  
d2bmea\_ d1wxqa1 d2gf0a1 d4ldja1 d1zunb3 d1d5ca\_ d4lv5b\_ d1efca3  
d1kmqa\_ d2g6ba1 d3lrpa\_ d1tada2 d2y8ea\_ d4rd4a1 d1z06a1 d2heia\_  
d3a58b\_ d1u01a2 d1d2ea3 d1zj6a1 d2ocba\_ d3rwoa\_ d1mr3f\_ d2e9sa1  
d4u5xa1 d2iwra\_ d2fn4a1 d3bwdd\_ d2nzja1 d2atva1 d2ksqa\_ d3l43a\_  
d1mkya2 d1mkya1 d1wmsa\_ d1jnja3 d2rmka\_ d1f6ba\_ d1f60a3 d1gota2  
d2fh5b1 d1gl6a\_ d2wblc\_ d1m7ba\_ d1wf3a1 d1f5na2 d1t9ha2 d1z6xa1  
d1z0aa1 d2fg5a1 d2a5ja1 d2bcjq2 d1s0ua3 d1ky3a\_ d4y0va\_ d4lhwa\_  
d2qmea1 d2atxa1 d1egaa1 d1ryha\_ d1moza\_ d1nrjb\_ d2erya1 d3bfka\_  
d1puia\_ d1fzqa\_ d3j3az1 d3t5ga\_ d1shza2 d3defa\_ d2f7sa1 d3raba\_  
d3tsoa\_ d3aq4a\_ d2a17a1 d3sfva1 d3bc1a\_ d2ncda\_ d1sdma\_ d3h4sa1  
d2heha\_ d2grya\_ g3kin.1 d1kk8a2 d1br2a2 d1goja\_ d1f9va\_ d2mysa2  
d1lkxa\_ d3t0qa\_ d4db1a1 d3gbja\_ d1ry6a\_ d1v8ka\_ d3vrda1 d3vrda2  
d1fcdc2 d1fcdc1 d1h1oa2 d1h1oa1 d1m70a1 d1ig8a1 d1czan2 d1czan3  
d1czan1 d1ig8a2 d1czan4 d1bg3a4 d1bg3a3 d1bg3a1 d3h1jd1 d2d0oa3  
d2d0oa2 d1nbwa3 d1hroa\_ d4gedb\_ d3zooa\_ d1mz4a\_ d1gu2a\_ d1f1fa\_



d1dvva\_ d1c6ra\_ d1c75a\_ d1e29a\_ d1gdva\_ d1cnoa\_ d1co6a\_ d2bh4x\_  
d2aiua\_ d5cytr\_ d1jdl\_ d1i8oa\_ d2zboa\_ d3dmia\_ d1ls9a\_ d1wvec\_  
d2yk3a\_ d3ph2b\_ d1dw0a\_ d5aura\_ d1ql3a\_ d1qn2a\_ d1f1ca\_ d2nqya\_  
d1h4ga\_ d1hixa\_ d1oa2a\_ d3b7ma\_ d4h7ma1 d3wp3a\_ d2vgda\_ d1igoa\_  
d3zsea\_ d2nlra\_ d3wx5a\_ d1oa3a\_ d1pvxa\_ d1m4wa\_ d1f5ja\_ d1oa4a\_  
d1ks5a\_ d4ix1a1 d2a6za1 d3a4ua\_ d2a6va1 d1evsa\_ d1cnt1\_ d1pvhb\_  
d1z7ca\_ d1huwa\_ d1bgea\_ d1rhga\_ d1f6fa\_ d1f45b\_ d1l1rb\_ d1axia\_  
d1etea\_ d3tgxb\_ d1scfa\_ d2z3qa1 d3qb1a\_ d1hula\_ d1m48a\_ d4nkqb\_  
d1eera\_ d5e4ea\_ d2o27a\_ d3b5ka\_ d2psma1 d4zf7a\_ d3uf5a\_ d2e17a\_  
d1iq0a2 d1r6ta2 d1ivsa4 d2cyba\_ d1rqga2 d1j09a2 d2yxna\_ d1f7ua2  
d1h3fa1 d1ffya3 d2g36a1 d1nzja\_ d1jila\_ d1n3la\_ d1i6la\_ d1pfva2  
d1h3na3 d3n9ia\_ d3sz3a1 d3sw2a\_ d1moxc\_ d1dx5i3 d1edmb\_ d1aut12  
d1aut11 d1dva11 d1szba2 d1kigl\_ d2y5f1\_ d1ijqa2 d1gk5a\_ d1g1sa2  
d1nt0a3 d1xdtr\_ d1lmja2 d1lmja1 d1nzia2 d2wphe\_ d1klil\_ d1pfx12  
d1pfx11 d1p9ja\_ d1g1ta2 d1f7ea\_ d4yzub\_ d2mgpa1 d1b9wa1 d1b9wa2  
d2mgpa2 d1ob1c1 d1ob1c2 d1n1ia2 d1n1ia1 d2npra2 d2npra1 d1m1xb5  
d2y5ia\_ d1qlsa\_ d1psra\_ d3n22a\_ d2egda\_ d4ggfc\_ d2wcea\_ d2luca\_  
d4aqia\_ d3nsia\_ d2lp3a\_ d1j55a\_ d1a4pa\_ d1k8ua\_ d1nsha\_ d1pvaa\_  
d3fs7a\_ d2pvba\_ d1ttxa\_ d1rwya\_ d2kyfa\_ d1rk9a\_ d1a75a\_ d1tiza1  
d1nyaa\_ d1g8ia\_ d1ggwa\_ d1wdcc\_ d3fwba\_ d1ggza\_ d2o5ga\_ d1ctaa\_  
d1m45a\_ d3i5gc\_ d1sl8a\_ d1fpwa\_ d2scpa\_ d2roaa\_ d4aqra\_ d3pn7b\_  
d1br1b\_ d2mysb\_ d1s6ca\_ d1bjfa\_ d2obha\_ d1jfka\_ d1jf0a\_ d1qv0a\_  
d1lkja\_ d2mlfc\_ d2m97a\_ d2d8na\_ d4by5a\_ d1jbaa\_ d4nqga\_ d1wdcb\_  
d2mysc\_ d1j7qa\_ d1s6ia\_ d1uhka2 d1r2ua\_ d1dtla\_ d3kf9a\_ d3pn7c\_  
d1gjya\_ d1y1xa\_ d1hqva\_ d1dvia\_ d1df0a1 d1qxp2\_ d4usla\_ d1wkya2  
d1uuqa\_ d3wh9a\_ d4m1ra\_ d1xyza\_ d4xuya\_ d2je8a5 d4bf7a1 d3cuia\_  
d1ur4a\_ d1qw9a2 d1odza\_ d2vzsa5 d1bqca\_ d2x2ya1 d1hjqa\_ d1qnra\_  
d4y7ea1 d1vjza\_ d4k68a\_ d2v3ga\_ d4hpga\_ d1nofa2 d1nq6a\_ d1h4pa\_  
d1aq0a\_ d3ziza\_ d4bs0a\_ d1ecea\_ d1h1na\_ d1ta3b\_ d1w91a2 d1l1wa\_  
d1uhva2 d1egza\_ d7a3ha\_ d1tvna1 d3nyda1 d1ghsa\_ d2cyga1 d4xv0a\_  
d2c8na2 d1w32a\_ d3emca\_ d1v6ya1 d1foba\_ d2uwfa1 d2fgla\_ d3niya1  
d2c0ha1 d1rh9a1 d1yq2a5 d1szna2 d1fa2a\_ d1pama4 d5do8a1 d1ea9c3  
d1hx0a2 d2fhfa5 d1qhoa4 d1avaa2 d1m53a2 d4m8ua1 d2gjpa2 d1lwha2  
d4howa1 d1ktba2 d1j0ha3 d3vm5a1 d2x1ia\_ d1wzaa2 d1uasa2 d2diea1  
d1mxga2 d1ht6a2 d1eswa\_ d1iv8a2 d5cpsa\_ d1ud2a2 d1zjaa1 d3gbea1  
d1kwga2 d1wdpa\_ d1gcya2 d1g5aa2 d1hvxa2 d3dhpa2 d2bhua3 d4do4a1  
d3qgva1 d1e43a2 d1g94a2 d2d3na2 d1gjwa2 d1gvia3 d1x1na1 d1r7aa2  
d1tz7a1 d2x42a1 d1tr9a1 d3abza1 d4c7ga2 d2gjxa1 d1nowa1 d1jaka1  
d1yhta1 d4toqa\_ d1wb0a1 d1w9pa1 d1eoka\_ d1itxa1 d1kfwal d1ledqa2  
d2gsja\_ d1hjxa1 d1jnda1 d1vf8a1 d3wdpp1 d3wq5a\_ d1gnxa\_ d4gxpa\_  
d4hz8a\_ d3aiua\_ d1wcga1 d1qvba\_ d3ahxa\_ d1v02a\_ d2dgaa\_ d1pbga\_  
d1vffa1 d1qoxa\_ d4ha4a\_ d2w0pa\_ d2diaa1 d2e9ia2 d2e9ja1 d2dj4a1  
d2eeba1 d2diba1 d2dmba1 d2dmca1 d2d7oa1 d2ee6a1 d2d7pa1 d2eeaa1  
d2di8a1 d1wlha1 d2d7na1 d2nqca\_ d2d7ma1 d2dica1 d3cnka\_ d2k3ta1

d2eeca1 d1qfha1 d2bp3a1 d1v05a\_ d2ee9a1 d2eeda1 d2di9a1 d3syxa1  
d1mkea1 d2p8va\_ d1xoda1 d1i7aa\_ d1qc6a\_ d1legxa\_ d1id1a\_ d2hmta\_  
d1iuka\_ d2csua1 d3q9ub\_ d2yv1a1 d3q9na\_ d2d59a\_ d1oi7a1 d2yv2a1  
d1y81a1 d1wgqa1 d1v89a1 d2coda1 d1zc3b\_ d1wg7a1 d1u5ea1 d1v61a1  
d2coca1 d2ys1a1 d1v5pa1 d1ntya2 d1wjma1 d1wila1 d1u29a\_ d1xx0a1  
d1unqa\_ d2zkmx3 d1fhoa\_ d1v88a1 d2adza1 d1x1fa1 d1p6sa\_ d2coaa1  
d1btka\_ d1v5ma1 d1faoa\_ d2x18a\_ d1dyna\_ d1x1ga1 d4kaxb\_ d2j59m1  
d1ki1b2 d1xcga2 d1txda2 d1u5da1 d1dbha2 d1wlha\_ d1upqa\_ d1v5ua1  
d1foea2 d2fj1a1 d1eaza\_ d2dfka2 d2cofa1 d1kz7a2 d1h6ta1 d1h6ua1  
d91dta1 d2ewda3 d1up7a1 d2dfda1 d1s6ya1 d1vjta1 d7mdha1 d1hyea1  
d1t2da1 d1ojsa3 d1b8pa1 d1ldna1 d1hyha1 d1civa1 d2a92a1 d1ez4a1  
d1i0za1 d1y6ja1 d1gv0a1 d1ur5a1 d1llda1 d1obba1 d1v8ba1 d1gdha1  
d1l7da1 d2dlda1 d1mx3a1 d1ygya1 d1qp8a1 d1li4a1 d1j4aa1 d2naca1  
d1npya1 d3t4ea2 d1a4ia1 d1o0sa1 d2hk9a2 d2egga2 d1b26a1 d1bvua1  
d1gq2a1 d1c1da1 d1leha1 d1gtma1 d1euzal d1nvtal d3dona2 d1edza1  
d1gpja2 d1p77a1 d1nyta1 d1b0aa1 d1v16a1 d1v91a1 d1txga2 d3f47a1  
d1mv8a2 d2pv7a2 d1xc2a3 d2ahra2 d4xiya1 d2f1ka2 d1pgja2 d1i36a2  
d1np3a2 d1lj8a4 d1teaa3 d1qmga2 d2i76a2 d2g5ca2 d1wdka3 d1dlja2  
d3cuma3 d1kola2 d1f8fa2 d1qora2 d1jqba2 d1vj0a2 d1cdoa2 d1gu7a2  
d1d1ta2 d1xa0a2 d2dm6a2 d1jvba2 d1rjwa2 d1llua2 d1h2ba2 d1tt7a2  
d1piwa2 d1o89a2 d1iz0a2 d1e3ja2 d1yb5a2 d1uufa2 d1e3ia2 d3gpdg1  
d1vc2a1 d2nvwa1 d1u8fo1 d1ydwa1 d1hdgo1 d2g17a1 d1cf2o1 d2czca2  
d1r0ka2 d1obfo1 d2cvoa1 d1ebfa1 d1h6da1 d1i32a1 d1zh8a1 d2q49a1  
d1qkia1 d1j5pa4 d3pzra1 d1xeea1 d1vkoa1 d1vm6a3 d3qvsa1 d2pkqo1  
d1b7go1 d1gr0a1 d1p1ja1 d1lc0a1 d1j0xo1 d3pwka1 d2hjsa1 d1zyao1  
d1vkna1 d1tlta1 d1nvmbl d3sjua\_ d3ojfa1 d1xu9a1 d2jjya1 d1n7ha\_  
d1y1pa1 d1h5qa\_ d1jtva\_ d4fs3a\_ d2bkaa1 d1gy8a\_ d2c5aa1 d1ulsa\_  
d1ooea\_ d2b69a1 d1y5ma1 d1spxa\_ d1aela\_ d1bxka\_ d1ydea1 d1gega\_  
d1hdoa\_ d1o5ia\_ d1e6ua\_ d1snya1 d2rhca\_ d3zv4a\_ d5ceja\_ d2d1ya1  
d1fjha\_ d3w8ea\_ d2fmua1 d1x1ta\_ d1rpna\_ d3ay7a1 d1k2wa\_ d1eq2a\_  
d2hrba1 d3ruaa\_ d2ew8a1 d4hwka\_ d1xgka\_ d2bd0a1 d1yo6a1 d2a35a1  
d2ntva\_ d1vl8a\_ d1hdca\_ d4bkua\_ d2ag5a1 d2q45a\_ d1nffa\_ d4iy1a\_  
d1zbqa1 d1kewa\_ d1ek6a\_ d1ja9a\_ d2q46a2 d1iy8a\_ d1cyda\_ d2ptga\_  
d1hxha\_ d1uzma1 d3lyla\_ d4m89a\_ d3wyea\_ d2blla1 d1w6ua\_ d1sb8a\_  
d2q2va\_ d4nr0a\_ d1e6wa\_ d2gasa\_ d3oiga1 d2bgka1 d1mxha\_ d1vl0a1  
d1rkxa\_ d1r6da\_ d1wmaa1 d1e7wa\_ d2c07a1 d1xkqa\_ d3tzha\_ d1g0oa\_  
d3lz6a\_ d1qyca\_ d1ledoa\_ d1gz6a\_ d1oc2a\_ d1t2aa\_ d1zema1 d2xoxa\_  
d1z45a2 d1geea\_ d1p33a\_ d3lt0a\_ d4e6pa\_ d2wyua\_ d1db3a\_ d4q9na\_  
d1xhla\_ d4olma\_ d1fmca\_ d2uvda\_ d2gdza1 d1uaya\_ d2z1ma\_ d2o23a2  
d2fr1a2 d2fr1a1 d1qsga\_ d1qyda\_ d4zjua\_ d2a4ka1 d1yb1a\_ d1wvga1  
d1yxma1 d3f4ba\_ d1mg5a\_ d1xg5a1 d1r55a1 d3gboa\_ d1atla\_ d1kufa\_  
d1buda\_ d4q1la\_ d1yp1a\_ d1wnia\_ d1t77a2 d3nqyb\_ d4gera\_ d1bqba\_  
d1xd3a\_ d3ifwa\_ d1t3ca\_ d1epwa3 d2a97a\_ d3fiea\_ d3ioqa\_ d1fh0a\_  
d1o0ea\_ d1khqa\_ d1m6da\_ d2cb5a\_ d1cs8a\_ g8pch.1 d1s4va\_ d2pnsa\_

d1vsna1 dlmira\_ dliwda\_ d2oula\_ d7pcka\_ d3bwka\_ d3bcna\_ d2p86a\_  
d1pvja\_ d1pcia\_ d1gece\_ d1deua\_ d4bs6a\_ d1xkga1 d1cqda\_ d1jqpa2  
d2c0ya\_ d2bdza\_ d3p5ua\_ d1zoya1 d1qo8a2 d1d4ca2 d1chua2 d1jnra2  
d1kf6a2 d2jk6a2 d2jk6a1 d1feca1 d1feca2 d1lpfa1 d1lpfa2 d1xhca1  
d1xhca2 d1dxla2 d1dxla1 d1gera2 d1m6ia2 d1onfa1 d3lada2 d3lada1  
d1w4xa1 d1w4xa2 d1gesa2 d1mo9a1 d1xdia1 d1fl2a2 d1fl2a1 d1fcda1  
d1fcda2 d1h6va2 d1h6va1 d1mo9a2 d1gv4a2 d1gv4a1 d2gv8a2 d2gv8a1  
d1aoga1 d1aoga2 d1hyua1 d1ebda1 d1ebda2 d3dk9a1 d1qlra2 d1qlra1  
d1gesa1 d1zbfal d2z1ha\_ d2etja1 d3qioa1 d1j11a\_ d2e41a\_ d1j12a\_  
d21sna1 d1io2a\_ d1uaxa\_ d2yv0x\_ d1mu2a1 d1i39a\_ d1o94a2 d1lqta1  
d1cjca1 d1pn0a1 d1reoa1 d1ju2a1 d2f5va1 d3c96a1 d2gmha1 d1pj5a2  
d1gpea1 d1n4wa1 d1k0ia1 d2dw4a2 d2ivda1 d1seza1 d2voua1 d1kdga1  
d1s5ja1 d2hbja2 d2igia\_ d1wlja\_ d1qhta1 d4dlea1 d1tgoa1 d2f96a1  
d3tr8a1 d3mxma\_ d1q8ia1 d1y97a1 d1w0ha\_ d1kfsa1 d2py5a1 d1noya\_  
d1d5aa1 d1yt3a3 d2guia\_ d3mwpal d4kb1a\_ d1xl4a1 d3vsqa\_ d2gixa1  
d1p7ba1 d2v76a\_ d1wj1a1 d1aqca\_ d1qqga2 d1qqga1 d1ntva\_ d1n3ha\_  
d4dbba\_ d3f0wa1 d1wgua1 d2cy4a1 d3hqca\_ d1wvha1 d1xr0b1 d1jmx4  
d1pbya3 d1pbya4 d1r7ha\_ d1faaa\_ d1wika1 d1xfla\_ d1ttza1 d2f51a1  
d1ti3a\_ d1nhoa\_ d1sena\_ d2i4aa\_ d1ep7a\_ d1zmaa1 d1fo5a\_ d3lefa1  
d3diea1 d2yana1 d1z6na1 d1oaza\_ d3zywa1 d4aj8a\_ d1nm3a1 d4fiwa\_  
d1wmja\_ d4hs1a1 d1iloa\_ d1xwaa1 d1wjka1 d2vmla\_ d1fb6a\_ d1gh2a\_  
d1h75a\_ d1nw2a\_ d1kx5b\_ d3a6na\_ d4m6ba2 d2nqbd\_ d3wkjd\_ d2yfwe\_  
d4h9na\_ d5bnxa\_ d1kx5c\_ d3r45a\_ d1eqzb\_ d4jjnb\_ d1f66c\_ d1eqza\_  
d4wnnb\_ d1u35c1 d1id3a\_ d2nqbc\_ d1kx5d\_ d1ku5a\_ d1b67a\_ d2b5ea2  
d2b5ea3 d2b5ea1 d2b5ea4 d2kp1a1 d2kp2a1 d1hyua3 d1j08a1 d1j08a2  
d1pd212 d1nhya2 d2a2ra2 d1k0dd2 d1f2ea2 d1gsua2 d1f3ba2 d2fhea2  
d2pvqa1 d1tw9a2 d1oyja2 d1e6ba2 d3ik7a1 d4is0a1 d1r5aa2 d1jlva2  
d1m0ua2 d3gtub2 d1z9ha2 d1okta2 d1axda2 d2gsra2 d1tu7a2 d1k3ya2  
d1zgma1 d1b48a2 d1gnwa2 d1gwca2 d2gsta2 d1glqa2 d1oe8a2 d1pn9a2  
d1v2aa2 d1fw1a2 d1duga2 d1g7ea\_ d1qsaa2 d3wyha\_ d4g9sa1 d3gxra\_  
d1qqya\_ d1gd6a\_ d1f6ra\_ d1livma\_ d2gv0a\_ d1iiza\_ d2z2fa\_ d1j8xa\_  
d1gh1a\_ d1b9oa\_ d1741a\_ d1691a\_ d2o4wa\_ d1p37a\_ d1k28a3 d1xjta1  
d1jtma\_ d2f2qa\_ d4e97a1 d2za0a\_ d2c21a1 d1f9za\_ d1mpya2 d1kw3b2  
d1kw3b1 d4ghga1 d1tfza1 d3isqa1 d3isqa2 d1sqia1 d1sqia2 d1lkda2  
d1lkda1 d1mpya1 d1cjxa2 d1cjxa1 d1sp9b2 d1t47a1 d1t47a2 d1f1ua2  
d1sp8a1 d1sp8a2 d1f1ua1 d1etob\_ d1umqa\_ d1s5ja2 d1qhta2 d4dlea2  
d1tgoa2 d3py8a2 d1q8ia2 d1kfsa2 d2py5a2 d1qsta\_ d2beia1 d4m3sa\_  
d1u6ma1 d1ygha\_ d1yk3a1 d3dr6a\_ d1xmta\_ d1z4ea1 d2ge3a1 d1bo4a\_  
d2fiaa1 d2jdca1 d1y9wa1 d3to7a\_ d1wwza1 d2fl4a1 d2ozua1 d2b5ga\_  
d2cy2a1 d2p0wa\_ d1cm0a\_ d4pswa\_ d1yrea1 d1yr0a1 d1m4ia\_ d2gana1  
d1yvka1 d1ghea\_ d2g3aa1 d1y7ra1 d2euia1 d1q2ya\_ d2fsra1 d1xeba\_  
d2ae6a1 d1cjwa\_ d1qsma\_ d2aj6a1 d1y9ka1 d1i12a\_ d1vkca\_ d2atra1  
d1n71a\_ d2d4pa1 d2fiwa1 d2fe7a1 d1tiqa1 d2ou2a\_ d1yx0a1 d2fcka1  
d2j8ma\_ d2pq8a\_ d1z4ra1 d1s3za1 d1ufha\_ d2hqya1 d2hqya2 d1lrza2

d1ne9a1 d1lrza3 d1xvqa1 d1pn0a2 d3hy2a\_ d2cvba1 d1o8xa\_ d1lu4a\_  
d1we0a1 d2bmxa1 d2a4va1 d1psqa\_ d1xiya1 d1q98a\_ d1n8ja\_ d1zofa1  
d2ggta\_ d3tjja\_ d4je1a1 d1o73a\_ d3s9fa\_ d2zcta\_ d1qmv\_a\_ d1jfua\_  
d2b1ka\_ d5dvba1 d2b5xa1 d2v2ga\_ d1st9a\_ d3tb2a\_ d41lra\_ d4fh8a1  
d1e2ya\_ d1knga\_ d2h30a\_ d1i5ga\_ d2z9sa\_ d2f8aa1 d1tp9a1 d2b7ka\_  
d1nm3a2 d3hvva\_ d2wfca1 d4kcea\_ d1xvwa1 d4gqca1 d3qpma\_ d4k1fa\_  
d1zzoa1 d1gp1a\_ d1prxa\_ d2qked\_ d4ksoa\_ d1t4za1 d1wwja\_ d2m5ta\_  
d1cqqa\_ d1wqsa\_ d5bpea\_ d2ipha\_ d1lvoa\_ d2bhga1 d3tnta\_ d3sjia\_  
d3d23a1 d2fyqa\_ d3tloa\_ d3zvea1 d2hrva\_ d3q3ya1 d4asha1 d1e88a1  
d1l6ja5 d1l6ja4 d1eaka4 d1eaka3 d1l6ja3 d1h8pa1 d1jgta2 d1ofda3  
d1ea0a3 d1ecfa2 d1q15a2 d1ct9a2 d1te5a\_ d2h1ia1 d2r8ba1 d3b5ea1  
d3cn9a\_ d1auoa\_ d1lgya\_ d4l3wa\_ d1llfa\_ d1gz7a\_ d1lukca\_ d1c4xa\_  
d2rhwa\_ d1svpa\_ d1mbma\_ d3su6a1 d1cula1 d4agka\_ d1vcpa\_ d1q31a\_  
g1n1l.1 d3e90b\_ d1ep5a\_ d3u1jb\_ d1xwdc1 d3kj4a\_ d1w8aa\_ d2ifga3  
d1p9ag\_ d1xkua\_ d1eb6a\_ d1m4la\_ d2bk7a\_ d3fjua\_ d1z5ra1 d1kwma1  
d1uwy\_a2 d1jqga1 d2c1ca1 d1dtda\_ d2tbvc\_ d1c8nc\_ d1x36a\_ d1smvc\_  
d1ng0c\_ d4sbvc\_ d1lopa\_ d1f2nc\_ d1ddla\_ d1e57b\_ d1js9c\_ d1f15b\_  
d1za7a\_ d1laja\_ d1rypd\_ d1irua\_ d1rypc\_ d3unfk\_ d1rypa\_ d1j2pa\_  
d1irui\_ d1j2qh\_ d3unfh\_ d1m4ya\_ d1rypb\_ d1irul\_ d1irug\_ d1iru2\_  
d1rypg\_ d1g3ka\_ d1iruf\_ d1q5qa\_ d1e94a\_ d1irub\_ d1ryph\_ d3ty6a\_  
d1iruj\_ d1iruk\_ d1rype\_ d1irud\_ d1irue\_ d3mi01\_ d1rypf\_ d1iruh\_  
d2z3ba\_ d1iruc\_ d3mka2\_ d1irul\_ d1ny721 d1a6ca3 d1a6ca2 d1a6ca1  
d1pgl22 d1pgl21 d1pgl11 d1ny711 d1mqta\_ d1d4m3\_ d1fmd3\_ d2mev1\_  
g1aym.1 d1ev13\_ d4q4w1\_ d1r1a3\_ d2x5ia\_ d1rhi1\_ g1r1a.1 g1d4m.1  
g1rhi.1 d1b35b\_ d1loopa\_ d1tme1\_ d4iv1a\_ g1pvc.1 g1fpn.1 d1fpn1\_  
d4gb31\_ d1d4m1\_ d1fmd1\_ d1ev11\_ d2wzr3\_ d1qqp3\_ g1fmd.1 d2x5ic\_  
d1rhi3\_ g1oop.1 d1hxs1\_ g1hxs.1 d1fpn3\_ d1bev1\_ g2mev.1 d1eah3\_  
d1aym1\_ d1pvc3\_ d1qqp1\_ d1zba3\_ d1h8ta\_ d3vbhc\_ g1b35.1 g1bev.1  
d1hxs3\_ g1ev1.1 d1bev3\_ g1tmf.1 d1tmf1\_ d1b35a\_ d2mev3\_ g1eah.1  
g1h8t.1 d1eah1\_ d4q4w3\_ d1r1a1\_ d1aym3\_ d1pvc1\_ d1zba1\_ d1h8tc\_  
d1oopc\_ d1tme3\_ g1qqp.1 d4iv1c\_ g1tme.1 d3ubub\_ d1legia\_ d1qo3c\_  
d1v7pa\_ d1tdqb\_ d3ubua\_ d1c3ab\_ d1h8ua\_ d3bx4b\_ d1t8ca1 d1sb2a1  
d2ziba1 d3cada\_ d1byfa\_ d1j34b\_ d1jwia\_ d1jzna\_ d1c3aa\_ d1oz7b\_  
d1wmza\_ d3bdwb\_ d1hq8a\_ d1fifa1 d1dv8a\_ d3hupa\_ d1wk1a1 d1lumra\_  
d2afpa\_ d3bx4a\_ d1gz2a\_ d1sl6a\_ d1v7pb\_ d3g8ka\_ d1ixxa\_ d1j34a\_  
d1jwib\_ d1g1sa1 d1y17a1 d1ja3a\_ d1fvub\_ d3bdwa\_ d1sb2b1 d1fvua\_  
d1lumrc\_ d1oz7a\_ d4m17a\_ d3cfwa1 d1ypqa1 d1g1ta1 d3fd4a\_ d3l9jc\_  
d4dn8a1 d1v4lb\_ d1rdl1\_ d2msba\_ d4lt9a1 d3tc7a1 d3hoja\_ d1i4na\_  
d3vnda\_ d3n18a1 d1geqa\_ d3naval d1v5xa\_ d4a2ra1 d3tc6a1 d1ujpa\_  
d4ijba\_ d1xcfa\_ d1vc4a\_ d1rd5a\_ d1qopa\_ d3b5va\_ d2r80b\_ d1cqxa1  
d1cg5a\_ d3boma\_ d2h8fb\_ d2raoa\_ d3bj1a\_ d4hrrb\_ d2r50a\_ d3d1kb\_  
d2aa1b1 d3zhwa\_ d3hf4b\_ d3gdja\_ d1jebb\_ d3bj1b\_ d1x9fb\_ d1wmub\_  
d1gcva\_ d3bcqb\_ d3d4xb\_ d1gvha1 d2dc3a\_ d3hf4a\_ d4yu3a\_ d3k8ba\_  
d1qpwb\_ d2r80a\_ d3bcqa\_ d1v4wa\_ d3wtgb\_ d1j17a\_ d4esaa\_ d1a9we\_

d3d1ab\_ d1fsla\_ d4h21a\_ d1v4wb\_ d1mwca\_ d1vhba\_ d1jeba\_ d1spgb\_  
d1h97a\_ d1q1fa\_ d1tu9a1 d3d1aa\_ d1hdsb\_ d3hyub\_ d2zfb\_ d3fs4a\_  
d1oj6a\_ d1shrb\_ d4h21b\_ d4yu3b\_ d1spga\_ d3hrwa\_ d3qqra\_ d3at5a\_  
d4wchd\_ d3hyua\_ d1cg5b\_ d1uc3a\_ d1hbra\_ d2raob\_ d1outb\_ d4esab\_  
d3gdjb\_ d3qqqa\_ d1x9fc\_ d3vrfa\_ d1litha\_ d3mkba\_ d3d4xa\_ d3mjpa\_  
d1j16a\_ d3fh9a\_ d1outa\_ d2dc3b\_ d1lit2a\_ d3eoka\_ d3g46a\_ d1qpwa\_  
d3vrfb\_ d1ch4a\_ d1x9fd\_ d1hdsa\_ d2zfb\_ d3mkbb\_ d1or4a\_ d3wtga\_  
d1a4fa\_ d3fh9b\_ d3bomb\_ d3cy5a\_ d3at5b\_ d1x9fa\_ d2oifa\_ d4lmb\_  
d1cpcb\_ d3v57a\_ d1kn1a\_ d1cpca\_ d4f0ta\_ d2vjha\_ d4po5b\_ d1eyxa\_  
d1alla\_ d4f0tb\_ d1b33b\_ d1b8db\_ d4h0mb\_ d1b33a\_ d2vjhb\_ d4lm6b\_  
d2vmlb\_ d1allb\_ d2vjta\_ d3dbja\_ d2vmla\_ d2vjtb\_ d4f0ub\_ d1f99b\_  
d4rmpa1 d1liaa\_ d1eyxb\_ d2uulb\_ d4lmsb\_ d4f0ua\_ d2bv8a\_ d1f99a\_  
d2bv8b\_ d2c71b\_ d3dbjb\_ d4rmpb1 d1b8da\_ d4h0ma\_ d3v57b\_ d1kn1b\_  
d2uula\_ d2j96a\_ d1pjqa1 d1pfsa\_ d2a1ka\_ g1wht.1 d1azwa\_ d1mtza\_  
d2xqfa\_ d1ea5a\_ d1f6wa\_ d1dx4a\_ d1k4ya\_ d4qwwa\_ d2ha2a\_ d3c8da2  
d2pbla1 d1jkma\_ d1lzl\_ d1jjfa\_ d1gkub1 d1gkub2 d4zzva\_ d2xspa\_  
d1eg1a\_ d4v20a\_ d1ojja\_ d4ipma1 d4csia\_ d3pfza\_ d3ovwa\_ d2yoka\_  
d1xm5a\_ d1xaxa\_ d1tvia\_ d4iuua3 d4bvva\_ d5hpga\_ d3k65a\_ d1ki0a3  
d1ki0a2 d1ki0a1 d1a0ha1 d1pmla\_ d3sp8a3 d2feba1 d1dosa\_ d3qm3a1  
d2fjka\_ d1f74a\_ d3l21a\_ d2e1da\_ d1to3a1 d1w3ia\_ d1sfla\_ d1n7ka\_  
d1vcva1 d4imea\_ d1wa3a\_ d2ocza1 d1f2ja\_ d3m16a\_ d2yxga\_ d1ub3a\_  
d3a5fa\_ d1fbaa\_ d1l6wa\_ d1xfba1 d1wx0a1 d1vpxa1 d1ojxa\_ d2a4aa1  
d1xkya1 d3cq0a1 d3s1xa\_ d1f05a\_ d1fdja\_ d3cpa1 d4d2ja\_ d1yloa2  
d1y7ea2 d1y0ya3 d1l1fwa1 d1vixa1 d1fnoa4 d1vhua2 d1ysja1 d1vhea2  
d1z21a1 d2fvga2 d1vgya1 d1r3na1 d2grea2 d1xmba1 g1q71.1 d1rtqa\_  
d3rp2a\_ g1lucy.1 d1fuja\_ d2zchp\_ d3w94a\_ d1si5h\_ d1lo6a\_ g2pka.1  
d1cgha\_ d1kigh\_ d1a5ia\_ d3s9ba\_ d1hj8a\_ d1ao5a\_ d2anya\_ d1q3xa1  
d1gvza\_ d1azza\_ d4gsoa\_ d2f91a1 d1iaua\_ d1gdna\_ d1eufa\_ g1fiw.1  
d1eq9a\_ d4nfea\_ d2rdla\_ d1spja\_ d1elva1 d1a7sa\_ d1ekbb\_ d1pfxc\_  
d1yc0a\_ d2aiqa\_ g1fiz.1 d1fi8a\_ d4k60a\_ d4dgja\_ d1mzaa\_ d1op0a\_  
d3tjva\_ d1pytd\_ d1sgfg\_ g1gg6.1 d2eeka\_ g1rtf.1 d1a0ja\_ d3g01a\_  
d1pytc\_ d4e7na\_ d1ddja\_ d1z8ga1 d2hlca\_ d1npma\_ g1jou.1 d1sgfa\_  
d1autc\_ g2hnt.1 g1kdq.1 d1orfa\_ d3s69a\_ d4crga\_ d1fxya\_ d1bqya\_  
d1ra6a\_ d1muka\_ d3gsza\_ d1khva\_ d1te9a\_ d2xwha\_ d3uqsa\_ d3hkwa\_  
d3n6ma\_ d2cjqa\_ d2xyma\_ d1teba\_ d1te8a\_ d1s48a\_ d1u09a1 d4wfxa\_  
d3tyqa\_ d2pgga1 d3gv5b1 d1t94a2 d3bq0a2 d3lgia\_ d3i77a\_ d2z9ia2  
d4nsva\_ d1lcya2 d4jcna\_ d1agja\_ d1os8a\_ d1hpga\_ d1p3ca\_ d1l1ja\_  
d1qtfa\_ d1e69a\_ d1mv5a\_ d3g60a4 g1ii8.1 d1ewqa2 d1ji0a\_ d1qhla\_  
d1v43a3 d2wmfa1 d1vpla\_ d1g2912 d4a82a2 g1f2t.1 d2d62a1 d3tuic1  
d2bbsa1 d3g60a3 d2ixea\_ d1g6ha\_ d1sgwa1 d2qi9c\_ d3rlfa1 d3b60a1  
d3d31a2 d2pzea1 g1xew.1 d1jj7a\_ d1loxxk2 d2onka1 d1w1wa\_ d3gqba2  
d1skye3 d1xp8a1 d1tf7a2 d1tf7a1 d1ye8a1 d1skyb3 d2qe7d2 d4blta\_  
d4huta\_ d3l1daa2 d4hyya\_ d2i3ba1 d1cr1a\_ d3j9tb2 d3ntua2 d1vdza1  
d2z43a\_ d1e9ra\_ d1nlfa\_ d3ziaa2 d1n0wa\_ d1g6oa\_ d3ziad2 d3j9ta2

d1pzna2 d3gqbb2 d2i49a\_ d1nnfa\_ d1xvxa\_ dlursa\_ dlh3da1 dliuda\_  
d4mlva1 d1twya\_ d3e13x\_ d2nxoa1 d4pfua\_ d3ttma\_ d1elja\_ d2qmwal  
d1us5a\_ d1y3na1 d1jeta\_ d1uqwa\_ d4f19a1 d2esna2 d3thia\_ d3fasa1  
d2uyeb\_ d2xwva1 d1r9la\_ d2fyia1 d1pb7a\_ d2ozza1 d1sw5a\_ d1nh8a1  
d1vr5a1 d2g29a\_ d1xs5a\_ d3lswa\_ d2z23a\_ d3w9va\_ d3tcha\_ d1q35a\_  
d1z7me1 d3q27a\_ d1p99a\_ d1ve4a1 d2i6ea1 d4mcoa1 d4n8ya\_ d1eu8a\_  
d1zdma1 d1hs1a\_ d1ixca2 d1j1na\_ d1xvya\_ d1y9ua\_ d2z22a1 d1xoca1  
d4oera\_ d1wdna\_ d5f1qa1 d1xt8a1 d1i6aa\_ d4gwoa\_ d4igta1 d1pc3a\_  
d4mmpa1 d1o63a\_ d2cz1a1 d2onsa2 d4mija1 d4ok5a1 d2bmfa1 d2bmfa2  
d1yksa1 d1yksa2 d1jr6a\_ d2qeqa1 d2j1qa1 d1a1va2 d1eh3a\_ d3skpa\_  
d1dtza1 d1dtza2 d1ieja\_ d1jnfa2 d1jnfal d1b1xa2 d1b1xa1 d1jw1a1  
d1jw1a2 d1ryoa\_ d1h76a1 d1h76a2 d1etha2 d1w52x1 d2pp1a1 d1hpla2  
d2oxea1 d1bu8a2 d1rp1a2 d1c4oa1 d2p6ra3 d2p6ra4 d1oywa2 d1oywa3  
d1wrba1 d1w36b2 d1w36b1 d1c4oa2 d3bora\_ d1t6na\_ d2eyqa5 d2eyqa3  
d2eyqa2 d2zu6a2 d1veca\_ d1w36d1 d2g9na1 d1z3ix2 d2rb4a\_ d1hv8a1  
d1hv8a2 d1t5ia\_ d1w36c2 d2j0sa2 d2j0sa1 d1fuka\_ d3hjha1 d1z5za1  
d1qdea\_ d1z63a1 d1s2ma2 d1s2ma1 d1wp9a1 d1wp9a2 d1gm5a3 d1gm5a4  
d3dina4 d3dina3 d1q0ua\_ d1w36c1 d1z3ix1 d1nkta3 d1nkta4 d1uaaa2  
d1w36d2 g1qhh.1 d2fwra2 d2fwra1 d3q3ma\_ d1za0a1 d1mxra\_ d2inca\_  
d1jk0a\_ d2incb\_ d3hf1b\_ d1mtyb\_ d1r2fa\_ d2uw1a\_ d1mhyd\_ d3n37a\_  
d1afra\_ d1oquc\_ d1syya\_ d1mtyd\_ d2o1za\_ d1uzra\_ d1smsa\_ d2fkza\_  
d1zujal d1s3qa1 d2fjca1 d1z6om1 d1veia\_ d4dyya\_ d1jiga\_ d3gvya\_  
d2pyba\_ d4cy9a1 d3bvfa1 d1r03a\_ d2cf7a\_ d1nf4a\_ d1zs3a1 d4iwka\_  
d3ka8a\_ d3np0x\_ d11b3a\_ d4e6ka\_ d1z6oa1 d2fzfa1 d4dyua\_ d3ge4a\_  
d1jgca\_ d4am4a\_ d2z6ma\_ d1ji5a\_ d1vlga\_ d1lkoa1 d1krqa\_ d3qz3a\_  
d1o9ra\_ d2ffxj\_ d1euma\_ d1yv1a1 d2v2pa\_ d1j30a\_ d4di0a\_ d1dpsa\_  
d1oewa\_ d2qzxa\_ d2asia\_ d1psoe\_ d1miqa\_ d1smra\_ d2h6ta\_ d1pfza\_  
d1lizda\_ d3hd8a\_ d1j71a\_ d1dpja\_ d4aa9a\_ d1t6ex\_ g1b5f.1 g1lya.1  
g1htr.1 d1qdma2 d1bxoa\_ d1wkra\_ d1tzsa\_ d1libqa\_ d2qzwa\_ d1ex4a2  
d1c6va\_ d1bdqa\_ d3ggta\_ d3ixoa\_ d1mrxa\_ d2haha\_ d1tw7a\_ d4njsa\_  
d1sgua\_ d2p3da\_ d3d3ta\_ d2rkfa\_ d1c6ya\_ d2rspa\_ d3ogpa\_ d3ekwa\_  
d2o4na\_ d2j9ja\_ d1baia\_ d3ggua\_ d3lzua\_ d4npua\_ d4j55a\_ d2r8na\_  
d2fxda\_ d2p3ca\_ d4dqea\_ d3ttpa\_ d3t3ca\_ d2p3aa\_ d2hc0a\_ d2fdda\_  
d3mwsa\_ d1um8a\_ d1ixza\_ d1qvra2 d1qvra3 d1sxjc2 d1jr3d2 d2p65a\_  
d118qa2 d1g8pa\_ d3hu3a3 d1sxjd2 d1njfa\_ d1in4a2 d1sxja2 d1tuea1  
d2ce7a2 d1w5sa2 d1sxjb2 d1d2na\_ d1ny5a2 d1ofha\_ d2gnoa2 d2a5yb3  
d1fnaa2 d1u0ja1 d11v7a\_ d1iqpa2 d2fnaa2 d1ixsb2 d4gita\_ d1sxje2  
d1g41a\_ d1ux8a\_ d1dlya\_ d4i0va\_ d2bkma\_ d2bmma\_ d1k8rb\_ d1wgra1  
d1ef5a\_ d1wfyal d1e8ya3 d1wgyal d2cs4a1 d1wxma1 d2byeal d3kh0a1  
d2byfa1 d1wxaa1 d1e7ua3 d1h4ra3 d4yl8a1 d2a16a3 d4lu0a\_ d1of8a\_  
d3unda1 d3e9aa1 d1vr6a2 d1n8fa\_ d2qkfa\_ d1d9ea\_ d1o60a\_ d2h0ba\_  
d2erfa\_ d1h30a2 d1h30a1 d3mw4a1 d1pz7a\_ d2r1ba\_ d3v64a1 d3bopa1  
d3mw3a1 d1okqa1 d1okqa2 d2ftba\_ d1pmpa\_ d2rcqa1 d1fdqa\_ d4lkpa\_  
d1sa8a\_ d1vyfa\_ d1lpja\_ d3vg7a1 d4azqa1 d1o8va\_ d5bvqa\_ d1p6pa\_

d2qo4a\_ dlopba\_ dlyiva1 dlo1va\_ d4bvma1 d4tkba\_ d4i3ba\_ d1bwya\_  
d1ftpa\_ dlggla\_ d4gkca\_ d1cbia\_ d3p6da1 d1kqwa\_ d2a0aa1 gly43.1  
d1adqa1 d1fnga1 d1uvqb1 d1zs8a1 d2vola1 d2vola2 d1mfb12 d2jelh2  
d1uwel2 d3qq4b1 d1kjob\_ d1k5na1 d1osph2 d4odh12 d1low0a1 d1low0a2  
d1bfob2 d3l9ra2 d3jtth1 d2fath2 d4elkb2 d1fn4b2 d2xfxb\_ d1pg7x2  
d1cqka\_ d4k71b2 d1l1k2a1 d1leapb2 d4lfhg2 d1i4fa1 d2nw2a2 d1kfah2  
d1mhca1 d1h3ua1 d1wejh2 d1h0db2 d1a5fh2 d1kcvh2 d1mjuh2 d1qqda1  
d1kcrh2 d1k8ia1 d3huja2 d2nnab1 d1nfd2 d3mffb2 d1s9va1 d1l1k3h2  
d1q0x12 d1fv1b1 d1neza1 d4rfeb2 d1r3ha1 d1a6tb2 d1kjva1 d1pz5b2  
d1onqa1 d2bc4a2 d1de4a1 d1k8da1 d1tcra2 d1dn0b2 d1nfd2 d2xwtb2  
d1bfoa2 d1mexh2 d1iakb1 d1ypzf2 d4f7ea2 d1q7212 d2fbjh2 d1fe8h2  
d1clzh2 d1fngb1 d1uvqa1 d1vgka1 d1c16a1 d4j12a2 d4x99b2 d1igtb3  
d1je6a1 d1q72h2 d1nldh2 d1teth2 d2hmic2 d1i1ca2 d1i1ca1 d1k8ib1  
d1q0yh2 d1kfa12 d3frua1 d1pg7w2 d1u58a1 d1igyb4 d1igyb3 d1hyrc1  
d1klub1 d1deeb2 d1c12b2 d2bc4b2 d2ig2h2 d1kcv12 d3wn5b1 d1l1k2b\_  
d1l1k312 d1mjul2 d1sm3h2 d1q0xh2 d1zvs1 d1ydp1 d1u8ib2 d1ypze2  
d1kcu2 d2l1j7a\_ d1n4na\_ d2m8bb1 d2kyqa\_ d3psma\_ d1jkza\_ d1jxca\_  
d2g11a\_ d1ugla\_ d4uj0a\_ d2k4ua\_ d1hp2a\_ d2lu9a\_ d1baha\_ d2meoa1  
d1wm7a\_ d1hlya\_ d1n8ma\_ d1jlza\_ d1wpda\_ d1pvza\_ d1wt7a\_ d1rjia\_  
d1wz5a\_ d1m2sa\_ d1pjva\_ d1c49a\_ d1qkya\_ d2ktca1 d1wmta\_ d1du9a\_  
d1j5ja\_ d1r1ga\_ d1t0za\_ d2i61a\_ d1t1ta\_ d1sn4a\_ d1kv0a\_ d2l1kba\_  
d1npia\_ d1wwna\_ d1pe4a\_ d2kbka\_ d2li7a\_ d1djta\_ d2kbha\_ d1dq7a\_  
d1sega\_ d1omya\_ d1zywa1 d1jzaa\_ d1n9wa1 d1bbua1 d1e1oa1 d1c0aa1  
d1b8aa1 d3a74a1 d1eova1 d1t61c1 d1iyjb4 d1iyjb5 d1iyjb3 d1o7ia\_  
d4ipca1 d1x3ea\_ d4apva\_ d1jb7a1 d1jb7a2 d1jb7a3 d3kdfa\_ d1ue1b\_  
d1wjja1 d3eiva\_ d1xjva2 d1xjva1 d2ccza2 d1se8a\_ d1l1oc\_ d1jb7b\_  
d1qvca\_ d3ulla\_ d1qzga\_ d1miua4 d1miua5 d1miua3 d3g48a1 d1gd7a\_  
d1jjcb3 d1pyba\_ d1y14b1 d2nn6i1 d1i941\_ d2zjra2 d1smxa\_ d2qamc2  
d1hh2p1 d2r7da1 d1r12a2 d1wfga1 d3bzka4 d1x6oa2 d3a0ja\_ d2j01d2  
d2ja9a1 d4q15a\_ d1hr0w\_ d1luza\_ d2n3sa\_ d2vnud1 d1h95a\_ d1go3e1  
d2nn6h1 d2mola\_ d1iz6a2 d1jjga\_ d1e3pa2 d2ix0a3 d2ix0a2 d2lxja\_  
d1ueba3 d1ueba2 d2z0sa1 d1u0la1 d2ix0a1 d2eifa2 d2je6i1 d3i2za1  
d2c35b1 d2ahob2 d1t9ha1 d3i4oa\_ d2qall1 d1jt8a\_ d2nn6g1 d1g6pa\_  
d3cama\_ d1i94q\_ d1c9oa\_ d1d7qa\_ d2ba0a1 d2vnud2 d2vnud3 d1khia2  
d2qalq1 d1wi5a1 d1xta2 d1ny4a\_ d1dzka\_ d4tlja\_ d2a2ua\_ d4wfva\_  
d3t1da\_ d4iaxa\_ d3zq3a\_ d2nnda\_ d1i4ua\_ d1kxoa\_ d1bbpa\_ d1kt7a\_  
d1lexsa\_ d3s26a1 d1l1f7a\_ d1qfta\_ d4gh7a\_ d1z24a1 d1qabe\_ d1lxkia\_  
d1ew3a\_ d3bx7a\_ d4iawa1 d1n0sa\_ d3kzaa\_ d2k23a\_ d2l9ca1 d2joza1  
d1gm6a\_ d3kffa\_ d3saoa1 d1e5pa\_ d1yupa1 d1iua\_ d3zxha\_ d1cgl1a\_  
d1rm8a\_ d1hy7a\_ d2jsda\_ d1cxva\_ d1hv5a\_ d1i76a\_ d1d4ua2 d4alac\_  
d1pjwa\_ d1rera1 d1s6na\_ d3uzqb\_ d1c11a\_ d4lbqa\_ d1a78a\_ d1slta\_  
d4no4a\_ d3zsja\_ d3duia\_ d1g86a\_ d1is3a\_ d1qmja\_ d1hlca\_ d1tdha3  
d1q3ba3 d1ee8a3 d1k82a3 g1qmo.1 g1len.1 d3zyra\_ d1fnya\_ d1n47a\_  
g2ltn.1 d1avba\_ d3usua\_ d1dhkb\_ d1f9ka\_ d1ukga\_ d1g8wa\_ d1g9fa\_

d1wbfa\_ d3wcsa\_ d1g7ya\_ g1loe.1 d1mvqa\_ d1hqla\_ d1v6ia\_ d1dbna\_  
d1qnwa\_ d1fx5a\_ d4l8qa\_ d1ioaa\_ d3n35a\_ d3ubra\_ d1qo8a1 d1d4ca1  
d2k3va\_ d1ft5a\_ d1qdba\_ d1m1qa\_ d2j7aa\_ d1h21a\_ d1ogyb\_ d4fasa\_  
d1jnia\_ d1oaha\_ d1sp3a\_ d3h33a\_ d1rwja\_ d19hca\_ d1os6a\_ d3bxua\_  
d3h4na\_ d1i77a\_ d3caoa\_ d1j0pa\_ d2ctha\_ d1duwa\_ d1ofwa\_ d2e84a\_  
d1gyoa\_ d3h34a\_ d1dszb\_ d1a6ya\_ d3cbba\_ d1ynwa1 d1r4ia\_ d1hcqa\_  
d2hana\_ d2hanb\_ d2enval d1kb4b\_ d2n11b\_ d1lola\_ d1cita\_ d2dara2  
d2dara1 d1wyha2 d2dloa2 d1rutx4 d1rutx3 d2cuqa2 d1x4la2 d1x4la1  
d1x3ha2 d1x3ha1 d2d8za1 d1x61a2 d1x6aa1 d1x6aa2 d2cora2 d2cora1  
d1v6ga1 d1v6ga2 d2d8za2 d1x64a1 d1x64a2 d1b8ta1 d2co8a1 d1x63a2  
d2dj7a2 d2dj7a1 d2cu8a2 d2cu8a1 d1g47a2 d1g47a1 d1j2oa1 d1wyha1  
d2dloa1 d1wiga1 d1wiga2 d2cupa2 d2cupa3 d1x68a1 d2d8ya2 d2d8ya1  
d1m3va2 d1x62a1 d1x68a2 d1x61a1 d1b8ta3 d1b8ta2 d2d8xa2 d2d8xa1  
d1x4ka1 d1x4ka2 d2cuqa1 d1m3va1 d2co8a2 d1x63a1 d2cura1 d2cura2  
d1x62a2 d1op9a\_ d1y0la1 d1etzb1 d1egj11 d2gsib1 d1nj9a1 d4jfhd1  
d1aqk11 d1t2ja\_ d1l04h1 d1zvya1 d3v4v11 d4enec1 d1kxtb\_ d5e8ea1  
d2pxya\_ d4weud\_ d1xiwc\_ d2esvd1 d1qznh\_ d1logae1 d1f4xh1 d4n1hb\_  
d3ezjb1 d3mlwl1 d1kfah1 d1etza1 d1b4jh1 d3cfic\_ d4w68a\_ d2arja1  
d1ek3a\_ d2ok0l1 d1vera\_ d1uwgh1 d1blnb1 d1fpth1 d1rzga1 d2giya1  
d4m3kb1 d1nc2a1 d2nyyd1 d1ncna\_ d1fbih1 d5dxwa\_ d4fqqa1 d1dqdh1  
d1jfq11 d1kelh1 d1faih1 d1frgl1 d4m6n11 d1fo0a\_ d4hxb11 d3b5ga\_  
d3quyd1 d2h9gb1 d1i8kb\_ d2dd8h1 d2ck0h1 d1eaja\_ d4w6wb1 d2a6ib3  
d1t66d1 d2e27h\_ d1ob1b1 d1f11b1 d2v7na1 d1ad0a1 d2xt1b1 d1pskh1  
d4i13b1 d2op4l1 d1a0q11 d1uwel1 d1za3a1 d1ncb11 d4uu9a\_ d1bm3h1  
d1cloh1 d1nqba2 d1cf8h1 d4y5va\_ d1mhph1 d5anma1 d4cdgc1 d4ldeb\_  
d1y0lb1 d2pcpb1 d1z3gl1 d1dfb11 d1fh5h1 d3g5xa1 d1tzib1 d4dn3l1  
d3zhka1 d2b1hh1 d2uyla1 d1f3dh1 d1nj9b1 d2agjh1 d2h1p11 d1q72h1  
d8fabbb1 d1ndmb1 d1rjca1 d4u6hb1 d3upca\_ d2fbj11 d1osph1 d1tvda\_  
d2cjh\_ d4fhbd1 d1bd2d1 d1rz7h1 d3nn8a\_ d1blna1 d1knoa1 d1nfda1  
d2bmbb1 d1dq11\_ d1igyb1 d1igf11 d12e8h1 d3utza1 d1nc2b1 d1rihh1  
d4mwfb1 d4jvpa1 d1mieh1 d1rhfa1 d1fgn11 d1sbsh1 d1lp9e1 d1dn0a1  
d4lqf11 d1iaih1 d1kgcd1 d1mh5b1 d1gp011 d2g60h3 d1f8t11 d2jixd1  
d4grwh\_ d1fo0b\_ d1bfob1 d1axsa1 d1u9ka\_ d1nmbh\_ d1h8na1 d1h8na2  
d1jguh1 d4eura1 d3sdy11 d35c8h1 d1w7211 d1mvub\_ d1i9rh1 d1ob1a1  
d4wenb\_ d1yeeh1 d3ietc1 d1f58h1 d1ad0b1 d1mqk1\_ d1nbvh1 d4b50a\_  
d3r8bb\_ d1baf11 d1mamh1 d4rgne1 d2gsgb\_ d35c8l1 d1bafh1 d1aih1  
d2pcpa1 d2fath1 d2x1pa\_ d1orsb1 d1ibgl1 d1shma\_ d1a2yb\_ d1u0qa\_  
d2coqa\_ d1hilb1 d1qfwi\_ d1jv5b\_ d1fn4b1 d5e0qa\_ d1nsnh1 d1plgl1  
d4ocx11 d1kb5h1 d1rzfh1 d1pg7x1 d2fx7h1 d2oi9c\_ d1l7il1 d3eyva1  
d1d5il1 d4ffyl\_ d1tet11 d1a6wh\_ d1ac6a\_ d3dvfa\_ d1nfde1 d1mimh1  
d1ri8a1 d1jhlh\_ d3dura\_ d1fskb1 d1f97a1 d3so3b1 d2ak4d1 d1lp9f1  
d4z7wf1 d1l7th1 d4y5ya\_ d4x7ec1 d1emth1 d1ikf11 d1nlbh1 d4utal1  
d1bjma1 d1eapb1 d1u6ah1 d2dtgd1 d1kj2b\_ d1xeda1 d1cleh1 d1fgvh\_  
d2bnub1 d2fb4h1 d2dtgb1 d1ktrh\_ d1jpth1 d1qkz11 d4hepg\_ d2atpb1



d1flrh1 d2hrpl1 d1mvfa\_ d1iaim1 d3k80a1 d2jb5h1 d3zkxc\_ d4grwe\_  
d1it9h1 d1rhhb1 d3w9ec\_ d1e4wh1 d1sy6h1 d2j6eh1 d3qxta\_ d1jglh1  
d1p7ka1 d1tzhb1 d4n8pa1 d1gaf11 d2jelh1 d1wioa2 d4i0cc1 d1cicb1  
d1lmka2 d1lmka1 d1iqwh1 d1lorqb1 d1ejoh1 d1jnlh1 d4zg1a\_ d43c9b\_  
d1ggb11 d1wejh1 d3q6fa1 d1f3dj1 d3c6la1 d1bqlh1 d3p9wb\_ d1a3r11  
d1h0db1 d2uzil\_ d1eo811 d1qfwl\_ d1n7ml1 d1igja1 d1c5ch1 d2a9mh\_  
d1rmfh1 d1fj1b1 d4heme\_ d1ccza1 d1a5fh1 d1ogad1 d1dlfh\_ d1qa9b\_  
d1vge11 d3qskb\_ d1sjxa\_ d4ozfg1 d1sq2n\_ d1qd0a\_ d1kcvh1 d1c5db1  
d3qcul1 d8faba1 d3bn9d1 d1mjuh1 d4y8dc\_ d7fabh1 d3dvgb1 d1lo011  
d1a6tb1 d1gigh1 d1kcrh1 d2hwz11 d1yjdc1 d3clfl1 d4krna\_ d1dl7l\_  
d1e6ol1 d1mexh1 d3r0ma\_ d4kkna\_ d1fns11 d1oaqh\_ d1rzia1 d1lucb1  
d1ncw11 d4b41a\_ d1nfd1 d2mpah1 d2d7t11 d4grwf\_ d4b5ea\_ d1lk3h1  
d3u79a\_ d4u3xa\_ d1ghf11 d1bvkb\_ d1mcww1 d1b88a\_ d1jrhh1 d32c2b1  
d4wemb\_ d1dsfh\_ d1op3h1 d1ce111 d1iqda1 d1qoka1 d1qoka2 d1qfuh1  
d2crya1 d1ay1h1 d1oaql\_ d3ab0b\_ d1rur11 d1t4kb1 d1bz7b1 d1n0xh1  
d1for11 d1lucb11 d4w6yb\_ d43c9a\_ d2aabl1 d1tzia1 d4n1ca\_ d1k6qh1  
d3g9ab\_ d4tvsa1 d1igmh\_ d1pz5b1 d3dx9a1 d3wxwh\_ d1nakh1 d1kcull1  
d3eaka\_ d4qlra1 d1cr911 d1d9ka\_ d1f4x11 d1deea1 d2i27n2 d1c12a1  
d2orb11 d1j8hd1 d1mcph1 d1c5da1 d1kenh1 d1bd2e1 d1h5ba\_ d4x7fc1  
d3upaa\_ d1t3fa1 d1indh1 d2dtgc1 d4hc111 d1zv5a1 d4wgvb\_ d1uwgl1  
d4f37k1 d1aqkh1 d1vesa\_ d3zkqd\_ d1fpt11 d1lo411 d1knob1 d3rrqa\_  
d1ct8b1 d4orz\_ d1mlbb1 d4hgkc1 d1dqd11 d1bogb1 d4ozhe1 d1dr9a1  
d1i7za1 d1dn0b1 d1kell1 d1rzib1 d1ypzf1 d1wtla\_ d1hkfa\_ d1fail1  
d1figh1 d2vyre\_ d1sjva\_ d1ohqa\_ d1bfoa1 d1pkqb1 d1mjul1 d1b4j11  
d1nsn11 d2arjb1 d1p4bh\_ d4aj0a\_ d3nn8b\_ d2rcja1 d1f2xk\_ d4v1dd\_  
d1adqh1 d2eksa\_ d4k3ga\_ d1jfqh1 d1uweh1 d1frgh1 d4gftb\_ d1uz8b1  
d4n1ea\_ d1bm311 d1clo11 d3mcka1 d2vq1a1 d1ae6h1 d4aq1b1 d1uj3b1  
d1nbqa1 d1fh511 d2ck011 d2ywza\_ d1q7211 d4nxbx\_ d1hila1 d4hz1b1  
d2j8811 d1zmya1 d1cd0a\_ d1a4ka1 d1psk11 d1a0qh1 d4krmb\_ d1ncb11  
d2fbjh1 d1j8he1 d1i3ua\_ d1cf811 d1fe8h1 d2p1ya1 d1eeqa\_ d2x89a\_  
d1o10a\_ d2r01h1 d1ub5a1 d1dfbh1 d3eyvb1 d4jdvb1 d4p2cg\_ d2gsia1  
d2agj11 d1u3ha1 d2h1ph1 d1rih11 d1fskc1 d1boga1 d2a7711 d1osp11  
d1qfoa\_ d3dwta\_ d2fx711 d1rz711 d3stba1 d1pkqa1 d1b6da1 d1dzba2  
d1dzba1 d1kj2a\_ d4l1ha\_ d1rzgb1 d1dqlh\_ d12e811 d1miel1 d1jmaa\_  
d1sbs11 d1fgnh1 d1f5811 d1mqkh\_ d1ndgb1 d3qeg11 d1iail1 d2aw2a1  
d1tqbc1 d3fo2a1 d4dkaa\_ d1f8th1 d2g6011 d2ywya\_ d1uj3a1 d1yc7a\_  
d3bd3a\_ d4w6xb1 d1nmb1\_ d1i8ka\_ d1rj1b1 d1ypze1 d1p7kb1 d1kxqe\_  
d1gpoh1 d2z4qa1 d1w72h1 d1i9r11 d4qgya1 d4xt1c\_ d2qqnh1 d1cical  
d3c08h1 d2cd0a\_ d2bdnh1 d1hnga1 d1mam11 d1nldh1 d1cr9h1 d4lcih1  
d3bkylh1 d3qg711 d1ai111 d1kxvc\_ d4iosd\_ d1l7ih1 d2x1qa\_ d1ub6b1  
d3k74b\_ d1libgh1 d1teth1 d1igya1 d1hxma1 d2x6ma\_ d2e71a\_ d5e03a\_  
d1qfwm\_ d2r0kh1 d1igjb1 d1rurh1 d1plgh1 d1mj8h1 d1yuhb1 d3fmgl1  
d1rzf11 d1emt11 d1ad9b1 d1igtb1 d1nlb11 d1d5ih1 d3k7ua\_ d4ffyh\_  
d1bwwa\_ d3dvga1 d1a6ta1 d1fgvl\_ d4qxgl1 d1mim11 d1jh11\_ d2hffb1

d2hh0l1 d1qkzh1 d1l7t1l d1afvh1 dliaii1 d2cjuh\_ dlum5h1 d2ghwb2  
d2ghwb1 d1kgce1 d2fgwh1 dlikfh1 dldvfd\_ d2i24n1 d2xtjb\_ dlza3b1  
d2yc1a\_ d2hh0h1 d2x1oa\_ d1bvka\_ d1rjla1 d5e7ba1 d1igta1 dlil1b1  
d2fb4l1 d1mvua\_ d1jpt1l d32c2a1 d1fvca\_ d1iqdb1 d2hrph1 d2p4ab\_  
d4qo1a\_ d1p2cb1 d1wt5c\_ d1t4ka1 d5c1mb\_ d1it9l1 d1bz7a1 d1b2wh1  
d1e4wl1 d1jnl1l d1yedb1 d1za6b1 d3u7aa\_ d1igfh1 d3gnml1 dlorsa1  
d1wejl1 d1a2ya\_ d1hxmb1 d1gafh1 d2j4wh1 d1pz5a1 d1j05a\_ d1a3rh1  
d4fq1l1 d1qfwh\_ d1eo8h1 d1n7mh1 d4s11a\_ d1kegh1 d5da4a\_ d1iqwl1  
d3whxb1 d1vgeh1 d1deeb1 d1c12b1 d1t2ql1 d1ad9a1 d3gsnb1 d3b2uc1  
d1ggbh1 d1t3fb1 d1nak1l d4ocmc\_ d1lila1 d2v7hb3 d2esve1 d1mcoh1  
d2qr0b1 d2q3aa\_ d1ct8a1 d1kcr1l d2pxyb\_ d2uzih\_ d5c3ld\_ d3durb\_  
d1c5c1l d2ak4e1 d1d17h\_ d1xiwd\_ d1mlba1 d1rmfl1 d1i7zb1 d1dlfl\_  
d2xa3a\_ d5bq7b1 d1dqqb1 d3h42l1 d1egjh1 d1kcv1l d1fe8l1 d2j6el1  
d1f3rb2 d1l1k3l1 d1sm3h1 d1q0xh1 d1ghfh1 d7fab1l d1igch1 d1lo0h1  
d4idla\_ d5c2bl\_ d1jrh1l d1il1a1 d3zhda1 d4kfzc\_ d1b0wa\_ d1e6oh1  
d1mex1l d4krpb\_ d1fnsh1 d1ncwh1 d4hgma\_ d4eigb1 d4rzca\_ d2mpal1  
d4y5xa\_ d5en2b1 d3lrga1 d4ej1c1 d1rhha1 d1j05b\_ d1forh1 d1q9wb1  
d2wzpd\_ d2aq2a1 d1h0da1 d3revb1 d2ij0c1 d1tzha1 d4m7jl1 d1k6ql1  
d3b9kc1 d1igml\_ d3qeua1 d1dsfl\_ d1celh1 d1kcuh1 d1zvha1 d1zvoa1  
d1tqbb1 d1ay1l1 d2qsc1l d2cgrh1 d1n10h1 d1ken1l d3eo0a1 d4n9ob1  
d1n0xl1 d3k1kc\_ d1c4qa\_ d1prtcl d2wv6d\_ d1prtf\_ d1l1trd\_ d4l63b1  
d1r4pb\_ d1t10f\_ d2bosa\_ d1prtb1 d3chbd\_ d2aq2b1 d1ck1a1 d1enfal  
d1i4pa1 d1vloa1 d1et9a1 d1esfa1 d2g9hd1 d4ohja1 d1klud1 d1bxta1  
d1eu3a1 d1ty0a1 d1fnua1 d2qaln1 d2cqva1 d1fhga\_ d2k1ma\_ d2d12a1  
d1biha3 d1biha1 d1biha4 d3qp3a1 d1g1ca\_ d1gxea\_ d1cvsc2 d1cvsc1  
d1xmwa2 d1m4ka2 d2otpa2 d1biha2 d1rhfa2 d2fcba2 d2fcba1 d1wwbx\_  
d1gsma2 d1epfa1 d1epfa2 d2dava1 d1waaa\_ d1f97a2 d1x44a1 d1vcaa2  
d1fnla2 d1fnla1 d3b5ha2 d3h8na2 d3h8na1 d1jbja1 d1jbja2 d1pd6a\_  
d1f2qa2 d1f2qa1 d3cx2a\_ d1nbqa2 d3b5ha1 d1n26a1 d1xiwb\_ d1xaua\_  
d1fltx\_ d2ifga1 d1olla1 d1olla2 d1cs6a4 d1cs6a3 d1cs6a2 d1cs6a1  
d2gw5a2 d1sy6a1 d1xiwa\_ d1lucta2 d1lucta1 d1ry7b2 d1gl4b\_ d1qz1a3  
d1olza1 d2c9aa1 d1wwca\_

**Family-85 (d.153.1.4)**

**Positive dataset contains 15 protein sequences.**

d1rypd\_ d1rypc\_ d3unfk\_ d1rypa\_ d1j2pa\_ d3unfh\_ d1rypb\_ d1rypg\_  
d1ryph\_ d3ty6a\_ d1rype\_ d3mi01\_ d1rypf\_ d2z3ba\_ d3mka2\_

**Negative dataset contains 3934 protein sequences.**

d1m32a\_ d1libja\_ d1c7na\_ d4q75a\_ d2bkwa1 d1t3ia\_ d1n8pa\_ d1qz9a\_  
d1jf9a\_ d1eg5a\_ d1p3wa\_ d3kgwa\_ d1cl1a\_ d2ctza1 d1vjoa\_ d2rfva\_  
d1gc0a\_ d1cs1a\_ d1d2fa\_ d2ch1a1 d1qgna\_ d1pffa\_ d1elua\_ d2xlba\_  
d3m83a1 d1u08a\_ d1lc5a\_ d1b5pa\_ d2ay1a\_ d1bw0a\_ d3pd6a\_ d7aata\_  
d2csta\_ d1j32a\_ d1fg7a\_ d4wlha\_ d1o4sa\_ d1v2da\_ d1gdea\_ d1m6sa\_  
d1v72a1 d1svva\_ d1ajsa\_ d1wsta1 d2f8ja2 d1lk9a\_ d1vp4a1 d1xi9a1  
d2gb3a1 d1yaaa\_ d3i2ka1 d1lnsa3 d1mpxa2 d2cfba1 d1dfoa\_ d1o69a\_

d1bj4a\_ d3k28a\_ d2bwpa\_ d3lg0a\_ d2fnua\_ d3ou5a\_ dlz7da1 d1b9ha\_  
dliaya\_ d4msoa\_ d1bs0a\_ d1s0aa\_ d1sffa\_ d3tqxa\_ dlmdoa\_ d3qboa\_  
d3pgya\_ d1bjna\_ d2dkja\_ d1ejia\_ d1vefa1 d4wxga\_ d3bs8a\_ d3gbxa1  
d1w23a\_ d1h6ta2 d1sefa\_ d1sfna\_ d1sq4a\_ d1qnia1 d1libya\_ d1f56a\_  
d1bypa\_ d1azca\_ d1ws8a\_ d3u25a\_ d1cuoa\_ d1id2a\_ d1rkra\_ d2iaac\_  
d4dp1x\_ d1nwpa\_ d2gima\_ d2i7sa\_ d1qhqa\_ d1hfua2 d1kbva1 d1kbva2  
d1sdda1 d1sdda2 d1gyca1 d1gyca2 d1mzya1 d2bw4a1 d1aoza1 d1aoza3  
d1aoza2 d1kyaa2 d1kyaa3 d1kyaa1 d1mzya2 d4e9sa1 d1sddb1 d1sddb2  
d1hfua1 d1hfua3 d1oela2 d1oela1 d1v10a2 d1v10a3 d1v10a1 d1a3qa1  
d1iknc\_ d3brda1 d1p7h11 d1oy3c\_ d1imhc1 d1gjia1 d1zk9a1 d2cxa1  
d2bema\_ d1pama1 d1ea9c1 d1qhoa1 d2fhfa2 d2fhfa1 d1k3ia1 d1j0ha1  
d1cxl1a1 d2bhua1 d1edqa1 d1flsa2 d1ut9a2 d1gvia1 d1txka1 d1zx5a1  
d1qwra\_ d2phla2 d2phla1 d1fxza2 d1fxza1 d1lrha\_ d1uija1 g1dgw.1  
d2v09a\_ d1uika2 d1uika1 d1dgwa\_ d1ep0a\_ d2pa7a1 d1wlta1 d1nxma\_  
d2c0za1 d1ktja\_ d1ds6b\_ d1fstb\_ d1ex0a1 d1p8ba\_ d2bjca1 d2hsga1  
d1qpza1 d1efaa1 d1h4ba\_ d2opoa\_ d1ydw2 d2nvwa2 d1zh8a2 d1qkia2  
d1xeea2 d1tlta2 d1au7a2 d1e3oc2 d2ovga\_ d1sq8a\_ d1rzsa\_ d3kz3a\_  
d3gpdg2 d2q49a2 d1hdgo2 d2g17a2 d2cvoa2 d2czca1 d3pwka2 d1obfo2  
d1i32a2 d1zyao2 d2pkqo2 d1b7go2 d2hjsa2 d1cf2o2 d1vkna2 d1nvmb2  
d2m9wa1 d3dfxa\_ d2msya\_ d2djoa1 d2r5za\_ d1au7a1 d1f43a\_ d2lmda1  
d1akhb\_ d1s7ea1 d3nara\_ d1zq3p1 d2craa1 d1mija\_ d4uuta\_ d3a01a\_  
d1x58a1 d3rkqa1 d3cmya1 d2cqxa1 d2da6a1 d1e3oc1 d1fjla\_ d1mh3a1  
d1ig7a\_ d1x41a1 d1wh7a1 d1gt0c1 d2mw8a\_ d1lfup\_ d1x2ma1 d1b72a\_  
d1wi3a1 d1jgga\_ d1wjha1 d1x2na1 d1mnmc\_ d2cuea1 d3k2aa\_ d2hosa\_  
d2jwta2 d1pufa\_ d1octc1 d2hi3a\_ d1b8ia\_ d4j19a\_ d3lnqa\_ d1wh5a1  
d1b8ib\_ d1fexa\_ d2cqra1 d1guua\_ d1ug2a1 d2cqqa1 d2ajea1 d4a69c\_  
d2crga1 d2iw5b1 d1xc5a1 d1ofcx1 d2cu7a1 d1wgxa1 d2cjja1 d2ckxa1  
d1gvda\_ d1hlva2 d1iufa2 d1iufa1 d1igna2 d3lv8a\_ d1s3ga1 d1zaka1  
d1s4qa\_ d3tvta2 d1uf9a\_ d1khta\_ d1ckea\_ d1osna\_ d1p5zb\_ d4tmka\_  
d3cm0a\_ d1tmka\_ d1jaga\_ d3h86a\_ d1t0hb\_ d1nn5a\_ d2h92a\_ d3kb2a1  
d2c95a1 d1yj5a2 d1kgda\_ d1ly1a\_ d2ak3a1 d1vyva2 d1deka\_ d2grja1  
d1p3ja1 d1y63a\_ d1e4ya1 d1s96a\_ d3iija1 d1lvga\_ d1nksa\_ d1vyua2  
d4e22a\_ d1qf9a\_ d1jjva\_ d1q3ta\_ d1lw7a2 d1teva\_ d1kjwa2 d1gsia\_  
d2iyva2 d1kaga\_ d1viaa\_ d1x6va3 d1z0ja1 d3umra2 d3gj0a1 d2gaoa1  
d1yzga1 d1x3sa1 d1g7sa4 d1puja\_ d1ludxa2 d1kk1a3 d2o52a\_ d1jwyb\_  
d1zcaa2 d1zcba2 d2fv8a1 d2cjwa\_ d3dz8a1 d1xzpa2 d1vg8a\_ d4qxaa\_  
d2ew1a1 d1x1ra1 d2bcgy\_ d3doea1 d3con\_ d3rega\_ d3wyga\_ d1upta\_  
d2b6ha1 d1zd9a1 d1lnza2 d1r5ba3 d1n0ua2 d1r2qa\_ d2f91a1 d2rhda\_  
d3q3jb\_ d3q85a\_ d1efma1 d1r8qa\_ d2gf9a1 d2akab1 d1ek0a\_ d1z08a1  
d2gcoa1 d2dy1a2 d4g01b\_ d2cxa1 d1svia\_ d3q72a\_ d4ac9a4 d2erxa1  
d2bmea\_ d1wxqa1 d2gf0a1 d4ldja1 d1zunb3 d1d5ca\_ d4lv5b\_ d1efca3  
d1kmqa\_ d2g6ba1 d3lrpa\_ d1tada2 d2y8ea\_ d4rd4a1 d1z06a1 d2heia\_  
d3a58b\_ d1u01a2 d1d2ea3 d1zj6a1 d2ocba\_ d3rwoa\_ d1mr3f\_ d2e9sa1  
d4u5xa1 d2iwra\_ d2fn4a1 d3bwdd\_ d2nzja1 d2atva1 d2ksqa\_ d3l43a\_

d1mkya2 d1mkya1 d1wmsa\_ d1jnuya3 d2rmka\_ d1f6ba\_ d1f60a3 d1gota2  
d1jala1 d2fh5b1 d1g16a\_ d2wblc\_ d1m7ba\_ d1wf3a1 d1f5na2 d1t9ha2  
d1z6xa1 d1z0aa1 d2fg5a1 d2a5ja1 d2bcjq2 d1s0ua3 d1ky3a\_ d4y0va\_  
d4lhwa\_ d2qmea1 d2atxa1 d1egaa1 d1ryha\_ d1moza\_ d1nrjb\_ d2erya1  
d3bfka\_ d1puia\_ d1fzqa\_ d3j3az1 d3t5ga\_ d1shza2 d3defa\_ d2f7sa1  
d3raba\_ d3tsoa\_ d3aq4a\_ d2a17a1 d3sfva1 d3bc1a\_ d2ncda\_ d1sdma\_  
d3h4sa1 d2heha\_ d2grya\_ g3kin.1 d1kk8a2 d1br2a2 d1goja\_ d1f9va\_  
d2mysa2 d1lkxa\_ d3t0qa\_ d4db1a1 d3gbja\_ d1ry6a\_ d1v8ka\_ d1s5ja2  
d1qhta2 d4dlea2 d1tgoa2 d3py8a2 d1q8ia2 d1kfsa2 d2py5a2 d1d5aa2  
d1k8ka2 d1k8ka1 d3uleb1 d3i33a2 d3i33a1 d1bupa1 d1dkgd2 d1dkgd1  
d4ci6a2 d1jcf1a1 d4a2ba2 d2fxua1 d1yaga2 d1yaga1 d4cbua2 d1bupa2  
d1g99a2 d2e1za2 d2e1za1 d1saza1 d1saza2 d1iqca2 d1iqca1 d1eb7a2  
d1eb7a1 d1nmla2 d1hroa\_ d4gedb\_ d3zooa\_ d1mz4a\_ d1gu2a\_ d1f1fa\_  
d1dvva\_ d1c6ra\_ d1c75a\_ d1e29a\_ d1gdva\_ d1cnoa\_ d1h32b\_ d2bh4x\_  
d2aiua\_ d5cytr\_ d1jdl1a\_ d1i8oa\_ d2zboa\_ d3dmia\_ d1ls9a\_ d1wvec\_  
d2yk3a\_ d3ph2b\_ d1dw0a\_ d5aura\_ d1ql3a\_ d1qn2a\_ d1f1ca\_ d4zzva\_  
d2xspa\_ d4v20a\_ d1ojja\_ d4ipma1 d1gpia\_ d4csia\_ d3pfza\_ d3ovwa\_  
d2yoka\_ d2nqya\_ d1h4ga\_ d1hixa\_ d1oa2a\_ d1olra\_ d3b7ma\_ d4h7ma1  
d3wp3a\_ d2vgda\_ d1igoa\_ d3zsea\_ d2nlra\_ d3wx5a\_ d1oa3a\_ d1pvxa\_  
d1m4wa\_ d1f5ja\_ d1oa4a\_ d1ks5a\_ d4ix1a1 d2ah2a1 d1n1ta1 d1etea\_  
d3tgxb\_ d1scfa\_ d2z3qa1 d3qb1a\_ d1hula\_ d1m48a\_ d4nkqb\_ d1eera\_  
d1v7mv\_ d5e4ea\_ d2o27a\_ d3b5ka\_ d2psma1 d4zf7a\_ d3uf5a\_ d4x51a\_  
d1d9ca\_ d4ypgc1 d3oq3a\_ d1lqsl\_ d1n1fa\_ d1aula\_ d1wu3i\_ d3bes1\_  
d3ux9a\_ d4dnxa2 d1m8pa2 d1v47a2 d1g8fa2 d1x6va2 d3rbaa\_ d2qtra\_  
d1nupa\_ d3l92a\_ d1f9aa\_ d1qjca\_ d2h29a\_ d1vlha\_ d1lod6a\_ d1lw7a1  
d1mrza2 d4ruka\_ d3wdpp1 d3wq5a\_ d1gnxa\_ d4gxp1a\_ d4hz8a\_ d1e4mm\_  
d3aiua\_ d1wcga1 d1qvba\_ d3ahxa\_ d1v02a\_ d2dgaa\_ d1pbga\_ d1vffa1  
d1qoxa\_ d4ha4a\_ d2e17a\_ d1liq0a2 d1irxa2 d1r6ta2 d2cyba\_ d1rqga2  
d1j09a2 d2yxna\_ d1f7ua2 d1h3fa1 d1ffya3 d2g36a1 d1nzja\_ d1jila\_  
d1n3la\_ d1i6la\_ d1pfva2 d1h3na3 d3n9ia\_ d3sz3a1 d3sw2a\_ d1moxc\_  
d1dx5i3 d1edmb\_ d1aut12 d1aut11 d1nqlb\_ d1dval1 d1szba2 d1kigl\_  
d2y5fl\_ d1ijqa2 d1gk5a\_ d1g1sa2 d1nt0a3 d1lmja2 d1lmja1 d1nzia2  
d2wphe\_ d1klil\_ d1pfx12 d1pfx11 d1p9ja\_ d1g1ta2 d1f7ea\_ d4yzub\_  
d1m1xb5 d1qx2a\_ d2y5ia\_ d1qlsa\_ d3n22a\_ d2egda\_ d4ggfc\_ d2wcea\_  
d2luca\_ d4aqia\_ d3nsia\_ d2lp3a\_ d1j55a\_ d1a4pa\_ d1k8ua\_ d1nsha\_  
d1exra\_ d1tiza1 d1nyaa\_ d1g8ia\_ d1ggwa\_ d1wdcc\_ d3fwba\_ d1ggza\_  
d2o5ga\_ d1ctaa\_ d1m45a\_ d3i5gc\_ d1sl8a\_ d1fpwa\_ d2scpa\_ d2roaa\_  
d4aqra\_ d3pn7b\_ d1br1b\_ d2mysb\_ d1s6ca\_ d1bjfa\_ d2obha\_ d1jfka\_  
d1jf0a\_ d1qv0a\_ d1lkja\_ d2mlfc\_ d2m97a\_ d2d8na\_ d4by5a\_ d1jbaa\_  
d4nqga\_ d1wdcb\_ d2mysc\_ d1j7qa\_ d1s6ia\_ d1uhka2 d1r2ua\_ d1dtla\_  
d3kf9a\_ d3pn7c\_ d1qjta\_ d1fi6a\_ d1c07a\_ d1wkya2 d1uuqa\_ d3wh9a\_  
d4m1ra\_ d1xyza\_ d4xuya\_ d2je8a5 d4bf7a1 d3cuia\_ d1ur4a\_ d1qw9a2  
d1odza\_ d2vzsa5 d1bqca\_ d2x2ya1 d1hjqa\_ d1qnra\_ d4y7ea1 d1vjza\_  
d4k68a\_ d2v3ga\_ d4hpga\_ d1nofa2 d1nq6a\_ d1h4pa\_ d1aq0a\_ d3ziza\_

d4bs0a\_ dlecea\_ dlh1na\_ dlta3b\_ dlw91a2 dlilwa\_ dluhva2 dlus3a2  
dlegza\_ d7a3ha\_ dltna1 d3nyda1 dlghsa\_ d2cyga1 d4xv0a\_ d2c8na2  
dlw32a\_ d3emca\_ dlv6ya1 dlfoaba\_ d2uwfa1 d2fgla\_ d3niya1 d2c0ha1  
dlrh9a1 d1yq2a5 d1szna2 dlfa2a\_ dlpama4 d5do8a1 dlea9c3 dlhx0a2  
d2fhfa5 dlqhoa4 dlavaa2 dl1m53a2 d4m8ua1 d2gjpa2 dl1wha2 d4howa1  
dlktba2 dlj0ha3 d3vm5a1 d2x1ia\_ dlwzaa2 dluasa2 d2diea1 dlmxga2  
dlht6a2 dleswa\_ dliv8a2 d5cpsa\_ dlud2a2 dlzjaa1 d3gbea1 dlkwga2  
dlwdpa\_ dlgcya2 dl1g5aa2 dlhvxa2 d3dhpa2 d2bhua3 d4do4a1 d3qgva1  
dl1e43a2 dl1g94a2 d2d3na2 dl1gjwa2 dl1gvia3 dl1x1na1 dl1r7aa2 dl1tz7a1  
d2x42a1 dl1tr9a1 d3abza1 d4c7ga2 d2gjxa1 dl1nowa1 dl1yhta1 dl1umqa\_  
dl1g2ha\_ dl1t77a2 d2w0pa\_ d2diaa1 d2e9ia2 d2e9ja1 d2dj4a1 d2eeba1  
d2diba1 d2dmba1 d2dmca1 d2d7oa1 d2ee6a1 d2d7pa1 d2eeaa1 d2di8a1  
dl1wlha1 d2d7na1 d2nqca\_ d2d7ma1 d2dica1 d3cnka\_ d2k3ta1 d2eeca1  
dl1qfha1 dl1qfha2 d2bp3a1 dl1v05a\_ d2ee9a1 d2eeda1 d2di9a1 d3syxa1  
dl1mkea1 d2p8va\_ dl1xoda1 dl1i7aa\_ dl1evha\_ dl1egxa\_ dl1id1a\_ d2hmta\_  
dl1lssa\_ dl1iuka\_ d2csua1 d3q9ub\_ d2yv1a1 d3q9na\_ d2d59a\_ dl1oi7a1  
d2yv2a1 dl1euca1 dl1y81a1 dl1wgqa1 dl1v89a1 d2coda1 dl1zc3b\_ dl1wg7a1  
dl1u5ea1 dl1v61a1 d2coca1 d2ys1a1 dl1v5pa1 dl1ntya2 dl1wjma1 dl1wila1  
dl1u29a\_ dl1xx0a1 dl1unqa\_ d2zkmx3 dl1fhoa\_ dl1v88a1 d2adza1 dl1x1fa1  
dl1p6sa\_ d2coaa1 dl1btka\_ dl1v5ma1 dl1faoa\_ d2x18a\_ dl1x1ga1 d4kaxb\_  
d2j59m1 dl1ki1b2 dl1xcga2 dl1txda2 dl1u5da1 dl1dbha2 dl1wlha\_ dl1upqa\_  
dl1v5ua1 dl1foea2 d2fjla1 dl1eaza\_ d2dfka2 d2cofa1 dl1kz7a2 d9ldta1  
d2ewda3 dl1up7a1 d2dfda1 dl1s6ya1 dl1vjta1 d7mdha1 dl1hyea1 dl1t2da1  
dl1ojsa3 dl1ldna1 dl1hyha1 dl1civa1 d2a92a1 dl1ez4a1 dl1i0za1 dl1y6ja1  
dl1gv0a1 dl1ur5a1 dl1llda1 dl1obba1 dl1v8ba1 dl1gdha1 dl1l7da1 d2dlda1  
dl1mx3a1 dl1ygya1 dl1qp8a1 dl1j4aa1 d2naca1 dl1npya1 d3t4ea2 dl1a4ia1  
dl1o0sa1 d2hk9a2 d2egga2 dl1b26a1 dl1bvua1 dl1gq2a1 dl1c1da1 dl1leha1  
dl1gtma1 dl1euza1 d3dona2 dl1edza1 dl1gpja2 dl1vi2a1 dl1p77a1 dl1nyta1  
dl1b0aa1 dl1v16a1 dl1v91a1 dl1txga2 d3f47a1 dl1mv8a2 d2pv7a2 dl1xc2a3  
d2ahra2 d4xiya1 d2f1ka2 dl1pgja2 dl1i36a2 dl1np3a2 dl1lj8a4 dl1teaa3  
dl1qmgga2 d2i76a2 d2g5ca2 dl1wdka3 dl1dlja2 d3cuma3 dl1kola2 dl1f8fa2  
dl1qora2 dl1jqba2 dl1vj0a2 dl1cdoa2 dl1gu7a2 dl1d1ta2 dl1xa0a2 d2dm6a2  
dl1jvba2 dl1rjwa2 dl1llua2 dl1h2ba2 dl1tt7a2 dl1piwa2 dl1o89a2 dl1iz0a2  
dl1e3ja2 dl1yb5a2 dl1uufa2 dl1e3ia2 d3gpdg1 dl1vc2a1 d2nvwal dl1u8fo1  
dl1ydwa1 dl1hdgo1 d2g17a1 dl1cf2o1 d2czca2 dl1r0ka2 dl1obfo1 d2cvoa1  
dl1ebfa1 dl1h6da1 dl1i32a1 dl1zh8a1 d2q49a1 dl1qkia1 dl1j5pa4 d3pzra1  
dl1xeea1 dl1vkoa1 dl1vm6a3 d3qvsa1 d2pkqo1 dl1b7go1 dl1gr0a1 dl1p1ja1  
dl1lc0a1 dl1j0xo1 d3pwka1 d2hjsa1 dl1zyao1 dl1vkna1 dl1tltal dl1nvmb1  
d3sjua\_ d3ojfa1 dl1xu9a1 d2jjya1 dl1n7ha\_ dl1ylpa1 dl1h5qa\_ dl1jtva\_  
d4fs3a\_ d2bkaa1 dl1gy8a\_ d2c5aa1 dl1ulsa\_ dl1ooea\_ d2b69a1 dl1y5ma1  
dl1spxa\_ dl1aela\_ dl1bxka\_ dl1ydea1 dl1gega\_ dl1hdoa\_ dl1o5ia\_ dl1e6ua\_  
dl1snya1 d2rhca\_ d3zv4a\_ d5ceja\_ d2d1ya1 dl1fjha\_ d3w8ea\_ d2fmua1  
dl1x1ta\_ dl1rpna\_ d3ay7a1 dl1k2wa\_ dl1eq2a\_ d2hrba1 d3ruaa\_ d2ew8a1  
d4hwka\_ dl1xgka\_ d2bd0a1 dl1yo6a1 d2a35a1 d2ntva\_ dl1v18a\_ dl1hdca\_

d4bkua\_ d2ag5a1 d2q45a\_ d1nffa\_ d4iy1a\_ d1zbqa1 d1kewa\_ d1ek6a\_  
d1ja9a\_ d2q46a2 d1iy8a\_ d1cyda\_ d2ptga\_ d1hxha\_ d1uzma1 d3lyla\_  
d4m89a\_ d3weya\_ d2b11a1 d1w6ua\_ d1sb8a\_ d2q2va\_ d4nr0a\_ d2gasa\_  
d3oiga1 d2bgka1 d1mxha\_ d1vl0a1 d1rkxa\_ d1r6da\_ d1wmaa1 d1e7wa\_  
d2c07a1 d1xkqa\_ d3tzha\_ d1g0oa\_ d3lz6a\_ d1qyca\_ d1ledoa\_ d1gz6a\_  
d1oc2a\_ d1t2aa\_ d1zema1 d2xoxa\_ d1z45a2 d1geea\_ d1p33a\_ d3lt0a\_  
d4e6pa\_ d2wyua\_ d1db3a\_ d4q9na\_ d1xhla\_ d4o1ma\_ d1fmca\_ d2uvda\_  
d2gdza1 d1uaya\_ d2z1ma\_ d2o23a2 d2fr1a2 d2fr1a1 d1qsga\_ d1qyda\_  
d4zjua\_ d2a4ka1 d1yb1a\_ d1wvga1 d1yxma1 d3f4ba\_ d1mg5a\_ d1xg5a1  
d1r55a1 d3gboa\_ d1kufa\_ d1buda\_ d4q11a\_ d1quaa\_ d1yp1a\_ d1wnia\_  
d2gfoa1 d1vjva\_ d2ayna1 d3nhea\_ g1y43.1 d1ex0a4 d2f4ma1 d1x3za\_  
d3ulra1 d1g9ka2 d1k7ia2 d1t3ca\_ d1epwa3 d2a97a\_ d3fiea\_ d3ioqa\_  
d1fh0a\_ d1o0ea\_ d1khqa\_ d1m6da\_ d2cb5a\_ d1cs8a\_ g8pch.1 d1s4va\_  
d2pnsa\_ d1vsna1 d1mira\_ d1liwda\_ d2oula\_ d7pcka\_ d3bwka\_ d3bcna\_  
d2p86a\_ d1pvja\_ d1pcia\_ d1gece\_ d1deua\_ d4bs6a\_ d1xkga1 d1cqda\_  
d1jqpa2 d2c0ya\_ d2bdza\_ d3p5ua\_ d2o36a\_ d1k9xa\_ d1zoya1 d1d4ca2  
d1chua2 d1jnra2 d1kf6a2 d2jk6a2 d2jk6a1 d1feca1 d1feca2 d1lpfa1  
d1lpfa2 d1xhca1 d1xhca2 d1dx1a2 d1dx1a1 d1gera2 d1m6ia2 d1onfa1  
d3lada2 d3lada1 d1w4xa1 d1w4xa2 d1gesa2 d1mo9a1 d1xdia1 d1fl2a2  
d1fl2a1 d1fcda1 d1fcda2 d1h6va2 d1h6va1 d1mo9a2 d1gv4a2 d1gv4a1  
d2gv8a2 d2gv8a1 d1aoga1 d1aoga2 d1hyua1 d1ebda1 d1ebda2 d3dk9a1  
d1q1ra2 d1q1ra1 d1gesa1 d1zbf1a\_ d2z1ha\_ d2etja1 d3qioa1 d1j11a\_  
d2e41a\_ d1j12a\_ d21sna1 d1io2a\_ d1uaxa\_ d2yv0x\_ d1mu2a1 d1i39a\_  
d1pn0a1 d1reo1 d1ju2a1 d2f5va1 d3c96a1 d2gmha1 d1gpea1 d1o5wa1  
d1n4wa1 d1k0ia1 d2dw4a2 d2ivda1 d1seza1 d2voua1 d1kdga1 d1s5ja1  
d2hbja2 d2igia\_ d1wlja\_ d1qhta1 d4dlea1 d1tgoa1 d2f96a1 d3tr8a1  
d3mxma\_ d1q8ia1 d1y97a1 d1w0ha\_ d1kfsa1 d2py5a1 d1noya\_ d1d5aa1  
d1yt3a3 d2guia\_ d3mwpa1 d4kb1a\_ d2y8ga\_ d1xkea1 d2y8fa\_ d2d5ra1  
d1offa\_ d1frra\_ d3wcqa\_ d1e9ma\_ d1l5pa\_ d1wria\_ d1i7ha\_ d3av8a\_  
d1czpa\_ d1rfka\_ d3p1ma1 d3b2ga\_ d2bt6a2 d1tq5a1 d3nva1 d1krha3  
d2h88b1 d1n62a2 d1t3qa2 d1kf6b2 d1zoyb1 d1jq4a\_ d1ffva2 d1dgja2  
d1rm6c2 d1jmx2 d1pbya1 d1pbya2 d1r7ha\_ d1faaa\_ d1wika1 d1xfla\_  
d1ttza1 d2f51a1 d1ti3a\_ d1nhoa\_ d1sena\_ d2i4aa\_ d1ep7a\_ d1zmaa1  
d1fo5a\_ d3lefa1 d3diea1 d2yana1 d1z6na1 d1oaza\_ d3zywa1 d4aj8a\_  
d1nm3a1 d4fiwa\_ d1wmja\_ d4hs1a1 d1iloa\_ d1xwaa1 d1wjka1 d2vm1a\_  
d1fb6a\_ d1gh2a\_ d1h75a\_ d1nw2a\_ d1kx5b\_ d3a6na\_ d4m6ba2 d2nqbd\_  
d3wkjd\_ d2yfwe\_ d4h9na\_ d5bnxa\_ d1kx5c\_ d3r45a\_ d1eqzb\_ d4jjnb\_  
d1f66c\_ d1eqza\_ d4wnnb\_ d1kx5a\_ d1u35c1 d1id3a\_ d2nqbc\_ d1kx5d\_  
d3us3a3 d3us3a1 d1tafa\_ d1bh9b\_ d1tafb\_ d1jf1b\_ d1q9ca\_ d2byka1  
d1n1ja\_ d4g92b\_ d1bh9a\_ d1jf1a\_ d1h3oa\_ d2bykb1 d1n1jb\_ d1pd212  
d1nhya2 d2a2ra2 d1k0dd2 d1f2ea2 d1gsua2 d1f3ba2 d2fhea2 d2pvqa1  
d1tw9a2 d1oyja2 d1e6ba2 d3ik7a1 d4is0a1 d1r5aa2 d1jlva2 d1m0ua2  
d3gtub2 d1z9ha2 d1okta2 d1axda2 d2gsra2 d1tu7a2 d1k3ya2 d1zgm1  
d1b48a2 d1gnwa2 d1gwca2 d2gsta2 d1glqa2 d1oe8a2 d1pn9a2 d1v2aa2

d1fw1a2 d1duga2 d1a0rp\_ d1lig8a1 d1lczan2 d1lczan3 d1lig8a2 d1lczan4  
d1bg3a4 d1bg3a3 d1bg3a2 d1bg3a1 d1qusa\_ d4ilya\_ d4olta\_ d1qgia\_  
d1qqya\_ d1gd6a\_ d1f6ra\_ d1livma\_ d2gv0a\_ d1iiza\_ d2z2fa\_ d1j8xa\_  
d1ghla\_ d1b9oa\_ d1741a\_ d1691a\_ d2o4wa\_ d1p37a\_ d1k28a3 d1xjta1  
d1jtma\_ d2f2qa\_ d4e97a1 d3w3ea\_ d4tx7a\_ d3cqla\_ d4msta\_ d3iwra\_  
d2z37a\_ d4dyga\_ d1mpya2 d1kw3b2 d1kw3b1 d4ghga1 d1tfza1 d3isqa1  
d3isqa2 d1sqia1 d1sqia2 d1lkda2 d1lkda1 d1mpya1 d1cjxa2 d1cjxa1  
d1sp9b2 d1t47a1 d1t47a2 d1f1ua2 d1sp8a1 d1sp8a2 d1w5qa\_ d2c1ha\_  
d1ohla\_ d1l6sa\_ d1qsta\_ d2beia1 d4m3sa\_ d1u6ma1 d1ygha\_ d1yk3a1  
d3dr6a\_ d1xmta\_ d1z4ea1 d2ge3a1 d1bo4a\_ d2fiaa1 d2jdca1 d1y9wa1  
d3to7a\_ d1wwza1 d2f14a1 d2ozua1 d2b5ga\_ d2cy2a1 d2p0wa\_ d1cm0a\_  
d4pswa\_ d1yrea1 d1yr0a1 d1m4ia\_ d2gana1 d1yvka1 d1ghea\_ d2g3aa1  
d1y7ra1 d2euia1 d1q2ya\_ d2fsra1 d1xeba\_ d2ae6a1 d1cjwa\_ d1qsma\_  
d2aj6a1 d1y9ka1 d1i12a\_ d1vkca\_ d2atra1 d1n71a\_ d2d4pa1 d2fiwa1  
d2fe7a1 d1tiqa1 d2ou2a\_ d1yx0a1 d2fcka1 d1p0ha\_ d2j8ma\_ d2pq8a\_  
d1z4ra1 d1s3za1 d1ufha\_ d1dosa\_ d1gvfa\_ d3qm3a1 d2fjka\_ d1xvqa1  
d1pn0a2 d3hy2a\_ d2cvba1 d1o8xa\_ d1lu4a\_ d1we0a1 d2bmxa1 d2a4va1  
d1psqa\_ d1xiya1 d1q98a\_ d1n8ja\_ d1zofa1 d2ggta\_ d3tjja\_ d4jela1  
d3s9fa\_ d2zcta\_ d1qmva\_ d1jfua\_ d2b1ka\_ d5dvba1 d2b5xa1 d2v2ga\_  
d1st9a\_ d3tb2a\_ d4llra\_ d4fh8a1 d1e2ya\_ d1knga\_ d2h30a\_ d1i5ga\_  
d2z9sa\_ d2f8aa1 d1tp9a1 d2b7ka\_ d1nm3a2 d3hvva\_ d2wfca1 d4kcea\_  
d1xvwa1 d4gqca1 d3qpma\_ d4k1fa\_ d1zzoa1 d1gpla\_ d1prxa\_ d4od7a1  
d1z6ma1 d4mcua1 d4dvca1 d1r4wa\_ d3l9sa\_ d1un2a\_ d3rppa\_ d1f74a\_  
d3l21a\_ d2e1da\_ d1to3a1 d1w3ia\_ d1sfla\_ d1n7ka\_ d1vcva1 d4imea\_  
d1wa3a\_ d2ocza1 d1f2ja\_ d3m16a\_ d2yxga\_ d1ub3a\_ d3a5fa\_ d1fbaa\_  
d1l6wa\_ d1xfba1 d1wx0a1 d1vpxa1 d1ojxa\_ d1mxsa\_ d2a4aa1 d1xkya1  
d3cq0a1 d3s1xa\_ d1f05a\_ d1fdja\_ d3cpra1 d4d2ja\_ d4mh8a\_ d1mu2a2  
d4i7ga1 d1etha2 d1w52x1 d2ppla1 d1hpla2 d1lpbb2 d2oxea1 d1bu8a2  
d1rpla2 d1ys1x\_ d4hs9a\_ d1ispa\_ d1ex9a\_ d3qmma\_ d2flia1 d1rpxa\_  
d1tqja\_ d1tqxa\_ d1mixa2 d1e5wa2 d1isna2 d2a16b2 d1lgya\_ d4l3wa\_  
d1llfa\_ d1gz7a\_ d1lukca\_ d4wfia\_ d4cg1a1 d3visa\_ d1lixra2 d2ddfa\_  
d3zxha\_ d1rm8a\_ d1eaka2 d1hy7a\_ d2jsda\_ d1cxva\_ d1hv5a\_ d1i76a\_  
d3p0ya1 d1igra1 d1igra2 d1n8yc2 d1n8yc1 d1m6ba2 d1m6ba1 d1m4la\_  
d2bk7a\_ d3fjua\_ d1z5ra1 d1kwma1 d1uwy2 d1jqga1 d2c1ca1 d1dtda\_  
d2tbvc\_ d1c8nc\_ d1x36a\_ d1smvc\_ d1ng0c\_ d4sbvc\_ d1lopa\_ d1f2nc\_  
d1cixa\_ d1y29a\_ d1v7fa\_ d2jtba\_ d1d1ha\_ d1g9pa\_ d1lupa\_ d1qk7a\_  
d1mb6a\_ d2a2va\_ d1niya\_ d1i25a\_ d2mpqa\_ d1ie6a\_ d1kqha\_ d1la4a\_  
d2mxoa1 d1dl0a\_ d1koza\_ d1qk6a\_ d1emxa\_ d1lqra\_ d1c6wa\_ d1js9c\_  
d1f15b\_ d1za7a\_ d1laja\_ d1ny721 d1a6ca3 d1a6ca2 d1a6ca1 d1pgl22  
d1pgl21 d1pgl11 d1ny711 d1mqta\_ d1d4m3\_ d1fmd3\_ d2mev1\_ g1aym.1  
d1evl3\_ d4q4w1\_ d1r1a3\_ d2x5ia\_ d1rhi1\_ g1r1a.1 g1d4m.1 g1rhi.1  
d1b35b\_ d1lopa\_ d1tme1\_ d4iv1a\_ g1pvc.1 g1fpn.1 d1fpn1\_ d4gb31\_  
d1d4m1\_ d1fmd1\_ d1evl1\_ d2wzr3\_ g1cov.1 d1qqp3\_ g1fmd.1 d2x5ic\_  
d1rhi3\_ g1oop.1 d1hxs1\_ g1hxs.1 d1fpn3\_ d1bev1\_ g2mev.1 d1eah3\_

d1aym1\_ d1pvc3\_ d1zba3\_ d1h8ta\_ d3vbhc\_ g1b35.1 g1bev.1 d1hxs3\_  
glev1.1 d1bev3\_ g1tmf.1 d1tmf1\_ d1b35a\_ d2mev3\_ gleah.1 g1h8t.1  
d1eah1\_ d4q4w3\_ d1r1a1\_ d1aym3\_ d1pvc1\_ d1zba1\_ d1h8tc\_ d1loopc\_  
d1tme3\_ g1qqp.1 d4iv1c\_ g1tme.1 d3ubub\_ d1legia\_ d1qo3c\_ d1v7pa\_  
d1tdqb\_ d3ubua\_ d1c3ab\_ d1h8ua\_ d3bx4b\_ d1t8ca1 d1sb2a1 d1qdda\_  
d2ziba1 d3cada\_ d1byfa\_ d1j34b\_ d1jwia\_ d1jzna\_ d1c3aa\_ d1oz7b\_  
d1wmza\_ d3bdwb\_ d1hq8a\_ d1fifa1 d1dv8a\_ d3hupa\_ d1wk1a1 d1lumra\_  
d2afpa\_ d3bx4a\_ d1gz2a\_ d1sl6a\_ d1v7pb\_ d3g8ka\_ d1ixxa\_ d1j34a\_  
d1jwib\_ d1g1sa1 d1y17a1 d1ja3a\_ d1fvub\_ d3bdwa\_ d1sb2b1 d1fvua\_  
d1umrc\_ d1oz7a\_ d4m17a\_ d3cfwa1 d1ypqa1 d1g1ta1 d3fd4a\_ d3l9jc\_  
d4dn8a1 d1rd1l\_ d2msba\_ d4w9ta\_ d1jvna1 d4x2ra1 d1ka9f\_ d4axka1  
d1thfd\_ d1h5ya\_ d4u28a\_ d2y88a\_ d4wd0a\_ d1vzwa1 d4toqa\_ d1wb0a1  
d1w9pa1 d1eoka\_ d1itxa1 d1kfwa1 d1goia2 d2gsja\_ d1hjxa1 d1jnda1  
d1vf8a1 d4lt9a1 d3tc7a1 d3hoja\_ d1i4na\_ d3vnda\_ d3n18a1 d1geqa\_  
d3naval d1v5xa\_ d4a2ra1 d3tc6a1 d1ujpa\_ d4ijba\_ d1xcfa\_ d1vc4a\_  
d1rd5a\_ d1qopa\_ d3b5va\_ d2r80b\_ d1cqxa1 d1cg5a\_ d3boma\_ d2h8fb\_  
d2raoa\_ d3bj1a\_ d4hrrb\_ d2r50a\_ d3d1kb\_ d2aa1b1 d3zhwa\_ d3hf4b\_  
d3gdja\_ d1jebb\_ d3bj1b\_ d1x9fb\_ d1wmub\_ d1gcva\_ d3bcqb\_ d3d4xb\_  
d1gvha1 d2dc3a\_ d3hf4a\_ d4yu3a\_ d3k8ba\_ d1qpwb\_ d2r80a\_ d3bcqa\_  
d1v4wa\_ d3wtgb\_ d1j17a\_ d4esaa\_ d1a9we\_ d3d1ab\_ d1fsla\_ d4h21a\_  
d1v4wb\_ d1mwca\_ d1vhba\_ d1jeba\_ d1spgb\_ d1h97a\_ d1q1fa\_ d1tu9a1  
d3d1aa\_ d1hdsb\_ d3hyub\_ d2zfbb\_ d3fs4a\_ d1oj6a\_ d1shrb\_ d4h21b\_  
d4yu3b\_ d1spga\_ d3hrwa\_ d3qqra\_ d3at5a\_ d4wchd\_ d3hyua\_ d1cg5b\_  
d1uc3a\_ d1hbra\_ d2raob\_ d1outb\_ d4esab\_ d3gdjb\_ d3qqqa\_ d1x9fc\_  
d3vrfa\_ d1litha\_ d3mkba\_ d3d4xa\_ d3mjpa\_ d1j16a\_ d3fh9a\_ d1outa\_  
d2dc3b\_ d1it2a\_ d3eoka\_ d3g46a\_ d1qpwa\_ d3vrfb\_ d1ch4a\_ d1x9fd\_  
d1hdsa\_ d2zfba\_ d3mkbb\_ d1or4a\_ d3wtga\_ d1a4fa\_ d3fh9b\_ d3bomb\_  
d3cy5a\_ d3at5b\_ d1x9fa\_ d2oifa\_ d4lmbx\_ d1cpcb\_ d3v57a\_ d1kn1a\_  
d1cpca\_ d4f0ta\_ d2vjha\_ d4po5b\_ d1eyxa\_ d1alla\_ d4f0tb\_ d1b8db\_  
d4h0mb\_ d1b33a\_ d2vjhb\_ d4lm6b\_ d2vmlb\_ d1allb\_ d2vjta\_ d3dbja\_  
d2vmla\_ d2vjtb\_ d4f0ub\_ d1f99b\_ d4rmpa1 d1liaa\_ d1eyxb\_ d2uulb\_  
d4lmsb\_ d4f0ua\_ d2bv8a\_ d1f99a\_ d2bv8b\_ d2c71b\_ d3dbjb\_ d4rmpb1  
d1b8da\_ d4h0ma\_ d3v57b\_ d1kn1b\_ d1liab\_ d2uula\_ d2j96a\_ d1azwa\_  
d1mtza\_ d2xqfa\_ d1ea5a\_ d1f6wa\_ d1dx4a\_ d1qe3a\_ d1k4ya\_ d4qwwa\_  
d2ha2a\_ d3c8da2 d2pbla1 d1jkma\_ d1lzl1a\_ d1jjfa\_ d2qvba\_ d2v9za\_  
d4kafa1 d4iuua3 d4bvva\_ d5hpga\_ d3k65a\_ d1ki0a3 d1ki0a2 d1ki0a1  
d1a0ha1 d1pmla\_ d3sp8a3 d2feba1 d1mdwa\_ d1qxp4 d1ziva1 d1zcmal  
d2m5ta\_ d1cqqa\_ d1wqsa\_ d5bpea\_ d2ipha\_ d1lvoa\_ d2bhga1 d3tnta\_  
d3sjia\_ d3d23a1 d2fyqa\_ d3tloa\_ d3zvea1 d2hrva\_ d3q3ya1 d4asha1  
d1cg2a1 d1yloa2 d1y7ea2 d1y0ya3 d1lfwa1 d1fnoa4 d1vhua2 d1ysja1  
d1vhea2 d1z21a1 d2fvga2 d1vgya1 d1r3na1 d2grea2 d1xmba1 g1q71.1  
d1rtqa\_ d3rp2a\_ g1lucy.1 d1fuja\_ d2zchp\_ d3w94a\_ d1si5h\_ d1lo6a\_  
g2pka.1 d1cgha\_ d1kigh\_ d1a5ia\_ d3s9ba\_ d1hj8a\_ d1ao5a\_ d2anya\_  
d1q3xa1 d1gvza\_ d1azza\_ d4gsoa\_ d2f91a1 d1iaua\_ d1gdna\_ d1eufa\_



g1fiw.1 d1eq9a\_ d4nfea\_ d2rdla\_ dlspja\_ d1elva1 d1a7sa\_ d1ekbb\_  
d1pfxc\_ d1yc0a\_ d2aiqa\_ g1fiz.1 d1fi8a\_ d4k60a\_ d4dgja\_ d1mzaa\_  
d1op0a\_ d3tjva\_ d1pytd\_ d1sgfg\_ g1gg6.1 d2eeka\_ g1rtf.1 d1a0ja\_  
d3g01a\_ d1pytc\_ d4e7na\_ d1ddja\_ d1z8ga1 d2hlca\_ d1npma\_ d1brup\_  
g1jou.1 d1sgfa\_ d1autc\_ g2hnt.1 g1kdq.1 d3s69a\_ d4crga\_ d1fxya\_  
d1bqya\_ d2ftba\_ d1pmpa\_ d2rcqa1 d1fdqa\_ d4lkpa\_ d1sa8a\_ d1vyfa\_  
d1lpja\_ d3vg7a1 d4azqa1 d1o8va\_ d5bvqa\_ d1p6pa\_ d2qo4a\_ d1opba\_  
d1yiva1 d1o1va\_ d4bvma1 d4tkba\_ d4i3ba\_ d1bwya\_ d1ftpa\_ d1ggla\_  
d4gkca\_ d1cbia\_ d3p6da1 d1kqwa\_ d2a0aa1 d1dzka\_ d4tlja\_ d2a2ua\_  
d4wfva\_ d3t1da\_ d4iaxa\_ d3zq3a\_ d2nnda\_ d1i4ua\_ d1kxoa\_ d1bbpa\_  
d1kt7a\_ d1exsa\_ d3s26a1 d1lf7a\_ d1qfta\_ d4gh7a\_ d1z24a1 d1qabe\_  
d1xkia\_ d1ew3a\_ d3bx7a\_ d4iawa1 d1n0sa\_ d1gkab\_ d3kzaa\_ d2k23a\_  
d2l9ca1 d2joza1 d1gm6a\_ d3kffa\_ d3saoa1 d1e5pa\_ d1yupa1 d1iia\_  
d3lgia\_ d3i77a\_ d2z9ia2 d4nsva\_ d1lcya2 d4jcna\_ d1agja\_ d1os8a\_  
d1hpga\_ d1p3ca\_ d1l1ja\_ d1e69a\_ d3g60a4 g1ii8.1 d1ewqa2 d1ji0a\_  
d1ghla\_ d1v43a3 d2wmfal d1vpla\_ d1g2912 d4a82a2 g1f2t.1 d2d62a1  
d3tuic1 d2bbsa1 d3g60a3 d2ixea\_ d1g6ha\_ d1sgwa1 d2qi9c\_ d3rlfa1  
d3b60a1 d3d31a2 d2pzea1 g1xew.1 d1jj7a\_ d1oxxk2 d2onka1 d1wlwa\_  
d1iwea\_ d1qf5a\_ d1vmaa2 d1nija1 d1np6a\_ d2p67a1 d3ihla\_ d1ls1a2  
d1s1ma2 d1iona\_ d2v40a\_ d1dj3a\_ d3hida\_ d2vo1a1 d2g0ta1 d1vcoa2  
d1j8mf2 d1g3qa\_ d1xjca\_ d1p9ba\_ d1qzxa3 d1ihua2 d1ihua1 d2qm8a\_  
d1dj2a\_ d4ioja\_ d1cp2a\_ d1yrba2 d1hyqa\_ d3gqba2 d1skye3 d1xp8a1  
d1tf7a2 d1tf7a1 d1ye8a1 d1skyb3 d2qe7d2 d4blta\_ d4huta\_ d3l1daa2  
d4hyya\_ d2i3ba1 d1cr1a\_ d3j9tb2 d3ntua2 d1vdza1 d2z43a\_ d1e9ra\_  
d1nlfa\_ d3ziaa2 d1n0wa\_ d1g6oa\_ d3ziad2 d3j9ta2 d1pzna2 d3gqbb2  
d2i49a\_ d1nnfa\_ d1xvxa\_ d1ursa\_ d1h3da1 d1iuda\_ d4m1va1 d1twya\_  
d3e13x\_ d2nxoa1 d4pfua\_ d3ttma\_ d1elja\_ d2qmwa1 d1us5a\_ d1y3na1  
d1jeta\_ d1uqwa\_ d4f19a1 d2esna2 d3thia\_ d3fasa1 d2uyeb\_ d2xwva1  
d1r9la\_ d2fyia1 d1pb7a\_ d2ozza1 d1sw5a\_ d1nh8a1 d1vr5a1 d2g29a\_  
d1xs5a\_ d3lswa\_ d2z23a\_ d3w9va\_ d3tcha\_ d1z7me1 d3q27a\_ d1p99a\_  
d1ve4a1 d2i6ea1 d4mcoa1 d4n8ya\_ d1eu8a\_ d1zbma1 d1hsla\_ d1ixca2  
d1j1na\_ d1xvya\_ d1y9ua\_ d2z22a1 d1xoca1 d4oera\_ d1wdna\_ d5f1qa1  
d1xt8a1 d1i6aa\_ d4gwoa\_ d4igta1 d1pc3a\_ d4mmpa1 d1o63a\_ d2czla1  
d2onsa2 d4mija1 d4ok5a1 d2bmfa1 d2bmfa2 d1yksa1 d1yksa2 d1jr6a\_  
d2qeqa1 d2jlqa1 d1a1va2 d1eh3a\_ d3skpa\_ d1dtza1 d1dtza2 d1ieja\_  
d1jnfa2 d1ce2a1 d1jnfa1 d1b1xa2 d1b1xa1 d1jw1a1 d1jw1a2 d1h76a1  
d1h76a2 d1c4oa1 d2p6ra3 d2p6ra4 d1oywa2 d1oywa3 d1wrba1 d1w36b2  
d1w36b1 d1c4oa2 d3bora\_ d1t6na\_ d2eyqa5 d2eyqa3 d2eyqa2 d2zu6a2  
d1veca\_ d1uaaa1 d1w36d1 d2g9na1 d1z3ix2 d2rb4a\_ d1hv8a2 d1t5ia\_  
d1w36c2 d2j0sa2 d2j0sa1 d1fuka\_ d3hjha1 d1z5za1 d1qdea\_ d1z63a1  
d1s2ma2 d1s2ma1 d1wp9a1 d1wp9a2 d1gm5a3 d1gm5a4 d3dina4 d3dina3  
d1q0ua\_ d1w36c1 d1z3ix1 d1nkta3 d1nkta4 d1uaaa2 d1w36d2 g1qhh.1  
d2fwra2 d2fwra1 d3q3ma\_ d1za0a1 d1mxra\_ d2inca\_ d1jk0a\_ d2incb\_  
d1mhyb\_ d3hf1b\_ d1mtyb\_ d1r2fa\_ d2uw1a\_ d1mhyd\_ d3n37a\_ d1afra\_

d1syya\_ dlmtyd\_ d2o1za\_ dluzra\_ dlmsa\_ d2fkza\_ dlzujal d1s3qa1  
d2fjca1 dlz6om1 dlveia\_ d4dyya\_ dljiga\_ d3gvya\_ d2pyba\_ d4cy9a1  
d3bvfa1 d1r03a\_ d2cf7a\_ d1nf4a\_ d1zs3a1 d4iwka\_ d3ka8a\_ d3np0x\_  
d1n1qa\_ d11b3a\_ d4e6ka\_ dlz6oa1 d2fzfa1 d4dyua\_ d3ge4a\_ dljgca\_  
d4am4a\_ d2z6ma\_ dlji5a\_ d1vlga\_ dlkrqa\_ d3qz3a\_ d1o9ra\_ d2ffxj\_  
d1euma\_ d1yv1a1 d2v2pa\_ dlj30a\_ d4di0a\_ d1dpsa\_ d1oewa\_ d2qzxa\_  
d2asia\_ d1psoe\_ dlmiqa\_ dlsmra\_ d2h6ta\_ d1pfza\_ dlizda\_ d3hd8a\_  
dlj71a\_ d1dpja\_ d4aa9a\_ d1t6ex\_ g1b5f.1 g11ya.1 g1htr.1 d1qdma2  
d1bxoa\_ d1wkra\_ d1tzsa\_ d1libqa\_ d2qzwa\_ d1ex4a2 d1c6va\_ d2v76a\_  
d1wj1a1 d1aqca\_ d1qqga2 d1qqga1 d1n3ha\_ d4dbba\_ d3f0wa1 d1p3ra\_  
d1wgua1 d2cy4a1 d3hqca\_ d1wvha1 d1xr0b1 d1bdqa\_ d3ggta\_ d3ixoa\_  
d1mrx\_ d2haha\_ d1tw7a\_ d4njsa\_ d1sgua\_ d2p3da\_ d1nsoa\_ d3d3ta\_  
d2rkfa\_ d1c6ya\_ d2rspa\_ d3ogpa\_ d3ekwa\_ d2o4na\_ d2j9ja\_ d1baia\_  
d3ggua\_ d31zua\_ d4npua\_ d4j55a\_ d2r8na\_ d2fxda\_ d2p3ca\_ d4dqea\_  
d3ttpa\_ d3t3ca\_ d2p3aa\_ d2hc0a\_ d2fdda\_ d3mwsa\_ d1k8rb\_ d1wgra1  
d1wfyal d1e8ya3 d1wgyal d11fda\_ d2cs4a1 d1wxma1 d2byeal d3kh0a1  
d2byfa1 d1wxaa1 d1e7ua3 d4yl8a1 d2a16a3 d2a13a1 d2cr5a1 d1wj4a1  
d3ubra\_ d1qo8a1 d1d4ca1 d2k3va\_ d1ft5a\_ d1qdba\_ d1m1qa\_ d2j7aa\_  
d1h21a\_ d1ogyb\_ d4fasa\_ d1jnia\_ d1oaha\_ d1sp3a\_ d1qoza\_ d5ajha1  
d3h33a\_ d1rwja\_ d19hca\_ d1os6a\_ d3bxua\_ d3h4na\_ d1i77a\_ d3caoa\_  
d1j0pa\_ d2ctha\_ d1duwa\_ d2e84a\_ d1hh5a\_ d1gyoa\_ d3h34a\_ d1wioa4  
d1ccza2 d1vcaa1 d1ic1a1 d2d9qb1 d2nxyb2 d2dara2 d2dara1 d1wyha2  
d2dloa2 d1rutx4 d1rutx3 d2cuqa2 d1x41a2 d1x41a1 d1x3ha2 d1x3ha1  
d2d8za1 d1x61a2 d1x6aa1 d1x6aa2 d2cora2 d2cora1 d1v6ga1 d1v6ga2  
d2d8za2 d1x64a1 d1x64a2 d1b8ta1 d2co8a1 d1x63a2 d2dj7a2 d2dj7a1  
d2cu8a2 d2cu8a1 d1g47a2 d1g47a1 d1j2oa1 d1wyha1 d2dloa1 d1wiga1  
d1wiga2 d2cupa2 d2cupa3 d1x68a1 d2d8ya2 d2d8ya1 d1m3va2 d1x62a1  
d1x68a2 d1x61a1 d1b8ta3 d1b8ta2 d2d8xa2 d2d8xa1 d1x4ka1 d1x4ka2  
d2cuqa1 d1m3va1 d2co8a2 d1j2oa2 d1x63a1 d2cura1 d2cura2 d1x62a2  
d2e3fa\_ d2e3ea\_ d211da\_ d2ny8x\_ d2e3ga\_ d2ny9x\_ d2nz3a\_ d21j7a\_  
d2m8bb1 d2kyqa\_ d3psma\_ d1jkza\_ d1jxca\_ d2g11a\_ d1ugla\_ d4uj0a\_  
d2k4ua\_ d1hp2a\_ d21u9a\_ d1baha\_ d2meoa1 d1wm7a\_ d1hlya\_ d1n8ma\_  
d1jlza\_ d1wpda\_ d1c55a\_ d1pvza\_ d1wt7a\_ d1rjia\_ d1wz5a\_ d1m2sa\_  
d1pjva\_ d1c49a\_ d1qkya\_ d2ktca1 d1wmta\_ d1j5ja\_ d1rlga\_ d1t0za\_  
d2i61a\_ d1t1ta\_ d1sn4a\_ d1kv0a\_ d21kba\_ d1npia\_ d1wwna\_ d1pe4a\_  
d2kbka\_ d21i7a\_ d1djta\_ d2kbha\_ d1dq7a\_ d1sega\_ d1omya\_ d1zywa1  
d1jzaa\_ d1n9wa1 d1e1oa1 d1c0aa1 d1b8aa1 d1l0wa1 d3a74a1 d1eova1  
d1t61c1 d1iyjb4 d1iyjb5 d1iyjb3 d1o7ia\_ d4ipca1 d1x3ea\_ d4apva\_  
d1jb7a1 d1jb7a2 d1jb7a3 d3kdfa\_ d1ue1b\_ d1wjja1 d3eiva\_ d1xjva2  
d1xjva1 d2ccza2 d1se8a\_ d111oc\_ d1jb7b\_ d1qvca\_ d3ulla\_ d1qzga\_  
d1miua4 d1miua5 d1miua3 d3g48a1 d1mkha\_ d1jjcb3 d1pyba\_ d1y14b1  
d2nn6i1 d1i941\_ d2zjra2 d1smxa\_ d2qamc2 d1hh2p1 d2r7da1 d1rl2a2  
d1wfga1 d3bzka4 d1x6oa2 d3a0ja\_ d2j01d2 d2ja9a1 d4q15a\_ d1hr0w\_  
d1luza\_ d2n3sa\_ d2vnud1 d1h95a\_ d1go3e1 d2nn6h1 d2mola\_ d1iz6a2

d1jjga\_ d1e3pa2 d2ix0a3 d2ix0a2 d21xja\_ d1ueba3 d1ueba2 d2z0sa1  
d1u0la1 d2ix0a1 d2eifa2 d2je6i1 d3i2za1 d2c35b1 d2ahob2 d1t9ha1  
d3i4oa\_ d2qall1 d1jt8a\_ d2nn6g1 d1g6pa\_ d3cama\_ d1i94q\_ d1c9oa\_  
d1d7qa\_ d2ba0a1 d2vnud2 d2vnud3 d1khia2 d2qalq1 d1wi5a1 d1xtda2  
d1ny4a\_ d1fvia1 d1ckma1 d1p16a1 d1x9na2 d1rpma\_ d2shpa1 d1yfoa\_  
d1l8ka\_ d2ooqa1 d1g4us2 d1p15a\_ d1lara2 d1lara1 d1wcha\_ d2fh7a2  
d2fh7a1 d1ohea1 d1ohea2 d2f4da\_ d1rxda\_ d2hxpa\_ d1xria\_ d1d5ra2  
d3ezza\_ d4y2ea\_ d1i9sa\_ d3azya\_ d3wvja\_ d1upsa1 d1ajoa\_ d2hyka\_  
d1ajka\_ d2vy0a\_ d1o4ya\_ d3o5sa\_ d3d6ea\_ d3atga\_ d1dypa\_ d1umza\_  
d3i4ia\_ d1c1la\_ d41bqa\_ d1a78a\_ d1slta\_ d4no4a\_ d3zsja\_ d3duia\_  
d1g86a\_ d1is3a\_ d1qmja\_ d2h0ba\_ d2erfa\_ d1h30a2 d1h30a1 d3mw4a1  
d2r1ba\_ d3v64a1 d1d2sa\_ d3bopa1 d3mw3a1 d1okqa1 d1okqa2 d1dszb\_  
d1a6ya\_ d3cbba\_ d1ynwa1 d1r4ia\_ d1hcqa\_ d2hana\_ d2hanb\_ d2enval  
d1kb4b\_ d2n11b\_ d1l01a\_ d1cita\_ d1adqa1 d1fnga1 d1uvqb1 d1zs8a1  
d2vola1 d2vola2 d1mfb12 d2jelh2 d1uwe12 d3qq4b1 d1kjob\_ d1k5na1  
d1osph2 d4odh12 d1ow0a1 d1ow0a2 d1bfob2 d3l9ra2 d3jtt1 d2fath2  
d4elkb2 d1fn4b2 d2xfxb\_ d1pg7x2 d1cqka\_ d4k71b2 d1lk2a1 d1leapb2  
d4lfhg2 d1i4fa1 d2nw2a2 d1kfah2 d1mhca1 d1h3ua1 d1wejh2 d1h0db2  
d1a5fh2 d1kcvh2 d1mjuh2 d1qqda1 d1kcrh2 d1k8ia1 d3huja2 d2nnab1  
d1nfd2 d3mffb2 d1s9va1 d1lk3h2 d1q0x12 d1fv1b1 d1neza1 d4rfeb2  
d1r3ha1 d1a6tb2 d1kjva1 d1pz5b2 d1onqa1 d2bc4a2 d1de4a1 d1k8da1  
d1tcra2 d1dn0b2 d1nfde2 d2xwtb2 d1bfoa2 d1mexh2 d1iakb1 d1ypzf2  
d4f7ea2 d1q72l2 d2fbjh2 d1fe8h2 d1clzh2 d1fngb1 d1uvqa1 d1vgka1  
d1c16a1 d4j12a2 d4x99b2 d1igtb3 d1je6a1 d1q72h2 d1nldh2 d1teth2  
d2hmic2 d1i1ca2 d1i1ca1 d1k8ib1 d1q0yh2 d1kfa12 d3frua1 d1pg7w2  
d1u58a1 d1igyb4 d1igyb3 d1hyrc1 d1klub1 d1deeb2 d1c12b2 d2bc4b2  
d2ig2h2 d1kcv12 d3wn5b1 d1lk2b\_ d1lk312 d1mjul2 d1sm3h2 d1q0xh2  
d1zvsal d1ydpal d1u8ib2 d1ypze2 d1kcu2 d1op9a\_ d1y0la1 d1etzb1  
d1egj11 d2gsib1 d1nj9a1 d4jfhd1 d1aqk11 d1t2ja\_ d1l04h1 d1zvya1  
d3v4v11 d4enec1 d1kxtb\_ d5e8ea1 d2pxya\_ d4weud\_ d1xiwc\_ d2esvd1  
d1qznh\_ d1ogae1 d1f4xh1 d4n1hb\_ d3ezjb1 d3mlw11 d1kfah1 d1etza1  
d1b4jh1 d3cfic\_ d4w68a\_ d2arja1 d1ek3a\_ d2ok011 d1vera\_ d1uwgh1  
d1blnb1 d1fpth1 d1rzga1 d2giya1 d4m3kb1 d1nc2a1 d2nyyd1 d1ncna\_  
d1fbih1 d5dxwa\_ d4fqqa1 d1dqdh1 d1jfq11 d1kelh1 d1faih1 d1frgl1  
d1fig11 d4m6n11 d1fo0a\_ d4hxb11 d3b5ga\_ d3quyd1 d2h9gb1 d1i8kb\_  
d2dd8h1 d2ck0h1 d1eaja\_ d4w6wb1 d2a6ib3 d1t66d1 d2e27h\_ d1ob1b1  
d1f11b1 d2v7na1 d1ad0a1 d2xt1b1 d1pskh1 d4i13b1 d2op411 d1a0q11  
d1uwe11 d1za3a1 d1ncb11 d4uu9a\_ d1bm3h1 d1cloh1 d1nqba2 d1cf8h1  
d4y5va\_ d1mhph1 d5anma1 d4cdgc1 d4ldeb\_ d1y01b1 d2pcpb1 d1z3gl1  
d1dfb11 d1fh5h1 d3g5xa1 d1tzib1 d4dn311 d3zhka1 d2b1hh1 d2uyla1  
d1f3dh1 d1nj9b1 d2agjh1 d2h1p11 d1q72h1 d8fabb1 d1ndmb1 d1rjca1  
d4u6hb1 d3upca\_ d2fbj11 d1osph1 d1tvda\_ d2cjh\_ d4fhbd1 d1bd2d1  
d1rz7h1 d3nn8a\_ d1blna1 d1knoa1 d1nfda1 d2bmkb1 d1dq11\_ d1igyb1  
d1igfl1 d12e8h1 d3utza1 d1nc2b1 d1rihh1 d4mwfb1 d4jvpa1 d1mieh1

d1rhfa1 d1fgn11 d1sbsh1 d1lp9e1 d1dn0a1 d4lqfl1 dliaih1 d1kgcd1  
d1mh5b1 d1gpol1 d2g60h3 d1f8t11 d2jixd1 d4grwh\_ d1fo0b\_ d1bfob1  
d1axsa1 d1u9ka\_ d1nmbh\_ d1h8na1 d1h8na2 d1jguh1 d4eura1 d3sdy11  
d35c8h1 d1w7211 d1mvub\_ d1i9rh1 d1ob1a1 d4wenb\_ d1yeeh1 d3ietc1  
d1f58h1 d1ad0b1 d1mqkl\_ d1nbvh1 d4b50a\_ d3r8bb\_ d1baf11 d1mamh1  
d4rgne1 d2gsgb\_ d35c811 d1bafh1 d1ai1h1 d2pcpa1 d2fath1 d2x1pa\_  
d1orsb1 d1libg11 d1shma\_ d1a2yb\_ d1u0qa\_ d2coqa\_ d1hilb1 d1qfwi\_  
d1jv5b\_ d1fn4b1 d5e0qa\_ d1nsnh1 d1plgl1 d4ocx11 d1kb5h1 d1rzfh1  
d1pg7x1 d2fx7h1 d2oi9c\_ d1l7i11 d3eyva1 d1d5i11 d4ffyl\_ d1tet11  
d1a6wh\_ d1ac6a\_ d3dvfa\_ d1nfde1 d1mimh1 d1ri8a1 d1jhlh\_ d3dura\_  
d1fskb1 d1f97a1 d3so3b1 d2ak4d1 d1lp9f1 d4z7wf1 d1l7th1 d4y5ya\_  
d4x7ec1 d1emth1 d1ikf11 d1nlbh1 d4utal1 d1bjma1 d1eapb1 d1u6ah1  
d2dtgd1 d1kj2b\_ d1xeda1 d1c1eh1 d1fgvh\_ d2bnub1 d2fb4h1 d2dtgb1  
d1ktrh\_ d1jpth1 d1qkz11 d4hepg\_ d2atpb1 d1flrh1 d2hrpl1 d1mvfa\_  
d1iaim1 d3k80a1 d2jb5h1 d3zkxc\_ d4grwe\_ d1it9h1 d1rhbb1 d3w9ec\_  
d1e4wh1 d1sy6h1 d2j6eh1 d3qxta\_ d1jglh1 d1p7ka1 d1tzhb1 d4n8pa1  
d1gaf11 d2jelh1 d1wioa2 d4i0cc1 d1cicb1 d1lmka2 d1lmka1 d1iqwh1  
d1orqb1 d1ejoh1 d1jnlh1 d4zgl1\_ d43c9b\_ d1ggbl1 d1wejh1 d3q6fa1  
d1f3dj1 d3c61a1 d1bqlh1 d3p9wb\_ d1a3r11 d1h0db1 d2uzil\_ d1eo811  
d1qfw1\_ d1n7m11 d1igja1 d1c5ch1 d2a9mh\_ d1rmfh1 d1fj1b1 d4heme\_  
d1ccza1 d1a5fh1 d1ogad1 d1dlfh\_ d1qa9b\_ d1vgel1 d3qskb\_ d1sjxa\_  
d4ozfg1 d1sq2n\_ d1qd0a\_ d1kcvh1 d1c5db1 d3qcul1 d8faba1 d3bn9d1  
d1mjuh1 d4y8dc\_ d7fabh1 d3dvgb1 d1l0011 d1a6tb1 d1gigh1 d1kcrh1  
d2hwhz11 d1yjdc1 d3clfl1 d4krna\_ d1d171\_ d1e6o11 d1mexh1 d3r0ma\_  
d4kkna\_ d1fnsl1 d1oaqh\_ d1rzia1 d1lucbh1 d1ncwl1 d4b41a\_ d1nfdfl1  
d2mpah1 d2d7t11 d4grwf\_ d4b5ea\_ d1lk3h1 d3u79a\_ d4u3xa\_ d1ghfl1  
d1bvkb\_ d1mcww1 d1b88a\_ d1jrhh1 d32c2b1 d4wemb\_ d1dsfh\_ d1op3h1  
d1ce111 d1iqda1 d1qoka1 d1qoka2 d1qfuh1 d2crya1 d1ay1h1 d1oaql\_  
d3ab0b\_ d1rur11 d1t4kb1 d1bz7b1 d1n0xh1 d1for11 d1lucbl1 d4w6yb\_  
d43c9a\_ d2aab11 d1tzia1 d4n1ca\_ d1k6qh1 d3g9ab\_ d4tvsa1 d1igmh\_  
d1pz5b1 d3dx9a1 d3wxwh\_ d1nakh1 d1kcul1 d3eaka\_ d4qlra1 d1cr911  
d1d9ka\_ d1f4x11 d1deea1 d2i27n2 d1c12a1 d2orb11 d1j8hd1 d1mcph1  
d1c5da1 d1kenh1 d1bd2e1 d1h5ba\_ d4x7fc1 d3upaa\_ d1t3fa1 d1indh1  
d2dtgc1 d4hc111 d1zv5a1 d4wgvb\_ d1uwgl1 d4f37k1 d1aqkh1 d1vesa\_  
d3zkqd\_ d1fpt11 d1l0411 d1knob1 d3rrqa\_ d1ct8b1 d4orz\_ d1mlbb1  
d4hgkc1 d1dqdl1 d1bogb1 d4ozhe1 d1dr9a1 d1i7za1 d1dn0b1 d1kell1  
d1rzib1 d1ypzf1 d1wtla\_ d1hkfa\_ d1fail1 d1figh1 d2vyre\_ d1sjva\_  
d1ohqa\_ d1bfoa1 d1pkqb1 d1mjul1 d1b4j11 d1nsn11 d2arjb1 d1p4bh\_  
d4aj0a\_ d3nn8b\_ d2rcja1 d1f2xk\_ d4v1dd\_ d1adqh1 d2eksa\_ d4k3ga\_  
d1jfqh1 d1uweh1 d1frgh1 d4gftb\_ d1uz8b1 d4nlea\_ d1bm311 d1clol1  
d3mcka1 d2vq1a1 d1ae6h1 d4aq1b1 d1uj3b1 d1nbqa1 d1fh511 d2ck011  
d2ywza\_ d1q7211 d4nbxb\_ d1hila1 d4hz1b1 d2j8811 d1zmya1 d1cd0a\_  
d1a4ka1 d1psk11 d1a0qh1 d4krmb\_ d1ncbh1 d2fbjh1 d1j8he1 d1i3ua\_  
d1cf811 d1fe8h1 d2p1ya1 d1eeqa\_ d2x89a\_ d1ol0a\_ d2r0lh1 d1ub5a1

d1dfbh1 d3eyvb1 d4jdvb1 d4p2cg\_ d2gsia1 d2agj11 d1u3ha1 d2h1ph1  
d1rihl1 d1fskc1 d1boga1 d2a7711 d1ospl1 d1qfoa\_ d3dwta\_ d2fx711  
d1rz711 d3stba1 d1pkqa1 d1b6da1 d1dzba2 d1dzba1 d1kj2a\_ d411ha\_  
d1rzgl1 d1dq1h\_ d12e811 d1miel1 d1jmaa\_ d1sbs11 d1fgnh1 d1f5811  
d1mqkh\_ d1ndgb1 d3qeg11 d1iail1 d2aw2a1 d1tqbc1 d3fo2a1 d4dkaa\_  
d1f8th1 d2g6011 d2ywya\_ d1uj3a1 d1yc7a\_ d3bd3a\_ d4w6xb1 d1nmb1\_  
d1i8ka\_ d1rjlb1 d1ypze1 d1p7kb1 d1kxqe\_ d1gpoh1 d2z4qa1 d1w72h1  
d1i9rl1 d4qgya1 d4xt1c\_ d2qqnh1 d1cica1 d3c08h1 d2cd0a\_ d2bdnh1  
d1hnga1 d1maml1 d1nldh1 d1cr9h1 d4lcih1 d3bkyh1 d3qg711 d1ai111  
d1kxvc\_ d4iosd\_ d117ih1 d2x1qa\_ d1ub6b1 d3k74b\_ d1libgh1 d1teth1  
d1igya1 d1hxma1 d2x6ma\_ d2e71a\_ d5e03a\_ d1qfwm\_ d2r0kh1 d1igjb1  
d1rurh1 d1plgh1 d1mj8h1 d1yuhb1 d3fmg11 d1rzfl1 d1emt11 d1ad9b1  
d1igtb1 d1nlbl1 d1d5ih1 d3k7ua\_ d4ffyh\_ d1bwwa\_ d3dvga1 d1a6ta1  
d1fgvl\_ d4qxgl1 d1mim11 d1jhl1\_ d2hffb1 d2hh011 d1qkzh1 d117t11  
d1afvh1 d1iaii1 d2cjuh\_ d1um5h1 d2ghwb2 d2ghwb1 d1kgce1 d2fgwh1  
d1ikfh1 d1dvfd\_ d2i24n1 d2xtjb\_ d1za3b1 d2yc1a\_ d2hh0h1 d2x1oa\_  
d1bvka\_ d1rjla1 d5e7ba1 d1igta1 d1il1b1 d2fb411 d1mvua\_ d1jpt11  
d32c2a1 d1fvca\_ d1iqdb1 d2hrph1 d2p4ab\_ d4qo1a\_ d1p2cb1 d1wt5c\_  
d1t4ka1 d5c1mb\_ d1it911 d1bz7a1 d1b2wh1 d1e4w11 d1jnl11 d1za6b1  
d3u7aa\_ d1igfh1 d3gnml1 d1orsa1 d1wejl1 d1a2ya\_ d1hxmb1 d1gafh1  
d2j4wh1 d1pz5a1 d1j05a\_ d1a3rh1 d4fq111 d1qfwh\_ d1eo8h1 d1n7mh1  
d4s11a\_ d1kegh1 d5da4a\_ d1iqw11 d3whxb1 d1vgeh1 d1deeb1 d1c12b1  
d1t2q11 d1ad9a1 d3gsnb1 d3b2uc1 d1ggbh1 d1t3fb1 d1nak11 d4ocmc\_  
d1lila1 d2v7hb3 d2esve1 d1mcoh1 d2qr0b1 d2q3aa\_ d1ct8a1 d1kcr11  
d2pxyb\_ d2uzih\_ d5c3ld\_ d3durb\_ d1c5c11 d2ak4e1 d1d17h\_ d1xiwd\_  
d1mlba1 d1rmfl1 d1i7zb1 d1dlfl\_ d2xa3a\_ d5bq7b1 d1dqqb1 d3h4211  
d1legjh1 d1kcv11 d1fe811 d2j6e11 d1f3rb2 d11k311 d1sm3h1 d1q0xh1  
d1ghfh1 d7fab11 d1igch1 d1lo0h1 d4idla\_ d5c2b1\_ d1jrh11 d1il1a1  
d3zhda1 d4kfzc\_ d1b0wa\_ d1e6oh1 d1mex11 d4krpb\_ d1fnsh1 d1ncwh1  
d4hgma\_ d4eigb1 d4rzca\_ d2mpa11 d4y5xa\_ d5en2b1 d3lrga1 d4ej1c1  
d1rhha1 d1j05b\_ d1forh1 d1q9wb1 d2wzpd\_ d2aq2a1 d1h0da1 d3revb1  
d2ij0c1 d1tzha1 d4m7j11 d1k6ql1 d3b9kc1 d1igml\_ d3qeau1 d1dsfl\_  
d1celh1 d1kcu11 d1zvha1 d1zvoa1 d1tqbb1 d1ay111 d2qscl1 d2cgrh1  
d1n10h1 d1ken11 d3eo0a1 d4n9ob1 d1n0x11 d3k1kc\_ d1c4qa\_ d1prtcl  
d2wv6d\_ d1prtf\_ d1ltrd\_ d4l63b1 d1r4pb\_ d1tl0f\_ d2bosa\_ d1prtb1  
d3chbd\_ d2aq2b1 d1ck1a1 d1lenfa1 d1v1oa1 d1et9a1 d1esfa1 d2g9hd1  
d4ohja1 d1klud1 d1bxta1 d1eu3a1 d1ty0a1 d1fnua1 d2qaln1 d2cqva1  
d1fhga\_ d2k1ma\_ d2d12a1 d1biha3 d1biha1 d1biha4 d3qp3a1 d1g1ca\_  
d1gxea\_ d1cvsc2 d1cvsc1 d1xmwa2 d1m4ka2 d2otpa2 d1biha2 d1rhfa2  
d2fcba2 d2fcba1 d1wwbx\_ d1gsma2 d1lepfa1 d1lepfa2 d2dava1 d1waaa\_  
d1f97a2 d1x44a1 d1vcaa2 d1fnla2 d1fnla1 d3b5ha2 d3h8na2 d3h8na1  
d1jbj11 d1jbj2 d1pd6a\_ d1f2qa2 d1f2qa1 d3cx2a\_ d1nbqa2 d3b5ha1  
d1n26a1 d1xiwb\_ d1xaua\_ d1fltx\_ d2ifga1 d1olla1 d1olla2 d1cs6a4  
d1cs6a3 d1cs6a2 d1cs6a1 d2gw5a2 d1sy6a1 d1xiwa\_ d1lucta2 d1lucta1

d1ry7b2 d1gl4b\_ d1qz1a3 d1olza1 d2c9aa1 d1wwca\_

**Family-86 (d.169.1.1)**

**Positive dataset contains 26 protein sequences.**

d3ubub\_ d1v7pa\_ d1tdqb\_ d3ubua\_ d3bx4b\_ d1t8ca1 d1sb2a1 d2ziba1  
d3cada\_ d1wmza\_ d3bdwb\_ d3hupa\_ d1wk1a1 d3bx4a\_ d1sl6a\_ d1v7pb\_  
d3g8ka\_ d1y17a1 d3bdwa\_ d1sb2b1 d4m17a\_ d3cfwa1 d1ypqa1 d3fd4a\_  
d3l9jc\_ d4dn8a1

**Negative dataset contains 4021 protein sequences.**

d1m32a\_ d1libja\_ d1c7na\_ d1liuga\_ d4q75a\_ d2bkwa1 d1t3ia\_ d1n8pa\_  
d1qz9a\_ d1jff9a\_ d1eg5a\_ d1p3wa\_ d3kgwa\_ d1cl1a\_ d2ctza1 d1vjoa\_  
d2rfva\_ d1gc0a\_ d1cs1a\_ d1d2fa\_ d2ch1a1 d1pffa\_ d1elua\_ d1c7ga\_  
d2v1pa1 d2ez1a\_ d1sefa\_ d1sfna\_ d1sq4a\_ d2bnma2 d1jx4a2 d3gv5b1  
d1t94a2 d3bq0a2 d2cfba1 d1dfoa\_ d1o69a\_ d1bj4a\_ d3k28a\_ d2bwpa\_  
d3lg0a\_ d2fnua\_ d3ou5a\_ d1z7da1 d1b9ha\_ d1iaya\_ d4msoa\_ d1bs0a\_  
d1s0aa\_ d1sffa\_ d3tqxa\_ d3qboa\_ d3pgya\_ d1bjna\_ d2dkja\_ d1ejia\_  
d1vefa1 d4wxga\_ d3bs8a\_ d3gbxa1 d1w23a\_ d1u08a\_ d1lc5a\_ d1b5pa\_  
d2ay1a\_ d1bw0a\_ d3pd6a\_ d7aata\_ d2csta\_ d1j32a\_ d1fg7a\_ d4wlha\_  
d1o4sa\_ d1v2da\_ d1gdea\_ d1m6sa\_ d1v72a1 d1svva\_ d1ajsa\_ d1wsta1  
d2f8ja2 d1lk9a\_ d1vp4a1 d1xi9a1 d2gb3a1 d1r0ka3 d1vkoa2 d1vm6a2  
d3qvsa2 d1gr0a2 d1p1ja2 d1ddla\_ d1e57b\_ d1xkla\_ d2wfla\_ d1f56a\_  
d1bypa\_ d1azca\_ d1ws8a\_ d3u25a\_ d1cuoa\_ d1id2a\_ d1rkra\_ d2iaac\_  
d4dp1x\_ d1nwpa\_ d2gima\_ d2i7sa\_ d1qhqa\_ d3ehbb1 d1fftb1 d1gyca3  
d1hfua2 d1kbva1 d1kbva2 d1sdda1 d1sdda2 d1gyca2 d1mzya1 d2bw4a1  
d1aoza1 d1aoza3 d1aoza2 d1kyaa2 d1kyaa3 d1kyaa1 d1mzya2 d4e9sa1  
d1sddb1 d1sddb2 d1hfua1 d1hfua3 d1oela2 d1oela1 d1v10a2 d1v10a3  
d1v10a1 d2dara2 d2dara1 d1wyha2 d2dloa2 d1rutx4 d1rutx3 d2cuqa2  
d1x4la2 d1x4la1 d1x3ha2 d1x3ha1 d2d8za1 d1x61a2 d1x6aa1 d1x6aa2  
d2cora2 d2cora1 d1v6ga1 d1v6ga2 d2d8za2 d1x64a1 d1x64a2 d1b8ta1  
d2co8a1 d1x63a2 d2dj7a2 d2dj7a1 d2cu8a2 d2cu8a1 d1g47a2 d1g47a1  
d1j2oa1 d1wyha1 d2dloa1 d1wiga1 d1wiga2 d2cupa2 d2cupa3 d1x68a1  
d2d8ya2 d2d8ya1 d1m3va2 d1x62a1 d1x68a2 d1x61a1 d1b8ta3 d1b8ta2  
d2d8xa2 d2d8xa1 d1x4ka1 d1x4ka2 d2cuqa1 d1m3va1 d2co8a2 d1j2oa2  
d1x63a1 d2cura1 d2cura2 d1x62a2 g1or0.1 g1cp9.1 g1e3a.1 d1a3qa1  
d1iknc\_ d3brda1 d1p7h11 d1imhc1 d1gjia1 d1zk9a1 d2cxka1 d2h0va\_  
d4alac\_ d1pjwa\_ d1rera1 d1s6na\_ d3uzqb\_ d2phla2 d2phla1 d1fxza2  
d1fxza1 d1lrha\_ d1uija1 g1dgw.1 d2v09a\_ d1uika2 d1uika1 d1dgwa\_  
d1ep0a\_ d2pa7a1 d1wlta1 d1nxma\_ d2c0za1 d1ds6b\_ d1fstb\_ d1ex0a1  
d2b5ea2 d2b5ea3 d2b5ea1 d2b5ea4 d2kp1a1 d2kp2a1 d1hyua3 d1hyua4  
d1j08a1 d1j08a2 d1yloa2 d1y7ea2 d1y0ya3 d1l1fwa1 d1vixa1 d1fnoa4  
d1vhua2 d1ysja1 d1vhea2 d1z21a1 d2fvga2 d1vgya1 d1r3na1 d2grea2  
d1xmba1 g1q71.1 d1rtqa\_ d2bjca1 d2hsga1 d1qpza1 d1efaa1 d1ydwa2  
d2nvwa2 d1h6da2 d1zh8a2 d1qkia2 d1xeea2 d1tlta2 d1mqta\_ d1d4m3\_  
d1fmd3\_ d2mev1\_ g1aym.1 d1ev13\_ d4q4w1\_ d1r1a3\_ d2x5ia\_ d1rhi1\_  
g1r1a.1 g1d4m.1 g1rhi.1 d1b35b\_ d1loopa\_ d1tme1\_ d4iv1a\_ g1pvc.1

g1fnp.1 d1fnp1\_ d4gb31\_ d1d4m1\_ d1fmd1\_ d2wzr3\_ g1cov.1 d1qqp3\_  
g1fmd.1 d2x5ic\_ d1rhi3\_ gloop.1 d1hxs1\_ g1hxs.1 d1fnp3\_ d1bev1\_  
g2mev.1 d1eah3\_ d1aym1\_ d1pvc3\_ d1qqp1\_ d1zba3\_ d1h8ta\_ d3vbhc\_  
g1b35.1 g1bev.1 d1hxs3\_ g1ev1.1 d1bev3\_ g1tmf.1 d1tmf1\_ d1b35a\_  
d2mev3\_ g1eah.1 g1h8t.1 d1eah1\_ d4q4w3\_ d1r1a1\_ d1aym3\_ d1pvc1\_  
d1zba1\_ d1h8tc\_ d1loopc\_ d1tme3\_ g1qqp.1 d4iv1c\_ g1tme.1 d1au7a2  
d1ic8a2 d3gpdg2 d2q49a2 d1hdgo2 d2g17a2 d2cvoa2 d2czca1 d3pwka2  
d1obfo2 d1i32a2 d1zyao2 d2pkqo2 d1b7go2 d2hjsa2 d1cf2o2 d1vkna2  
d1nymb2 d2msya\_ d2djoa1 d2r5za\_ d1au7a1 d1f43a\_ d2lmda1 d1akhb\_  
d1s7ea1 d3nara\_ d1zq3p1 d2craa1 d1mija\_ d4uuta\_ d3a01a\_ d1x58a1  
d3rkqa1 d3cmya1 d2cqxa1 d2da6a1 d1e3oc1 d1fjla\_ d1mh3a1 d1ig7a\_  
d1x41a1 d1wh7a1 d1gt0c1 d2mw8a\_ d1lfup\_ d1x2ma1 d1b72a\_ d1wi3a1  
d1wjha1 d1x2na1 d1mnmc\_ d2cuea1 d3k2aa\_ d2hosa\_ d2jwta2 d1pufa\_  
d1octc1 d2hi3a\_ d1b8ia\_ d4j19a\_ d3lnqa\_ d1wh5a1 d1b8ib\_ d1fexa\_  
d2cqra1 d1guua\_ d1ug2a1 d2cqqa1 d2ajea1 d4a69c\_ d1h8ac1 d2crga1  
d2iw5b1 d1xc5a1 d1ofcx1 d2cu7a1 d1wgxa1 d2cjja1 d2ckxa1 d1tc3c\_  
d1gda1 d1u78a2 d2iu5a1 d1zk8a1 d2g7sa1 d2fd5a1 d2np5a1 d1z0xa1  
d2id6a1 d2d6ya1 d2i10a1 d1vi0a1 d2oi8a1 d3c07a1 d2ns7a1 d2fq4a1  
d2yvea1 d1t33a1 d2o7ta1 d1rkta1 d2np3b1 d2g7ga1 d2gena1 d2fbqa1  
d2g7la1 d2gfna1 d2g3ba1 d2jj7a1 d2hyja1 d1sgma1 d1ui5a1 d2hkua1  
d2id3a1 d4jyka1 d3lv8a\_ d1s3ga1 d1zaka1 d1s4qa\_ d3tvt2 d1uf9a\_  
d1khta\_ d1ckea\_ d1osna\_ d1p5zb\_ d4tmka\_ d3cm0a\_ d1tmka\_ d1jaga\_  
d3h86a\_ d1t0hb\_ d1nn5a\_ d2h92a\_ d3kb2a1 d2c95a1 d1yj5a2 d1kgda\_  
d1ly1a\_ d2ak3a1 d1vyva2 d1deka\_ d2grja1 d1p3ja1 d1y63a\_ d1e4ya1  
d1s96a\_ d3iija1 d1lvga\_ d1nksa\_ d1vyua2 d4e22a\_ d1qf9a\_ d1jjva\_  
d1q3ta\_ d1ki9a\_ d1lw7a2 d1teva\_ d1kjwa2 d2xlba\_ d3m83a1 d1g3ma\_  
d1j99a\_ d1t8ta1 d1nsta\_ d1fmja\_ d1zrha\_ d2a3ra\_ d1aqua\_ d2zptx\_  
d3ckla\_ d1texas\_ d1q44a\_ d2gwaha\_ d1z0ja1 d3umra2 d3gj0a1 d2gaoa1  
d1yzga1 d1x3sa1 d1g7sa4 d1puja\_ d1udxa2 d1kk1a3 d2o52a\_ d1jwyb\_  
d1zcaa2 d1zcba2 d2fv8a1 d2cjwa\_ d3dz8a1 d1xzpa2 d1vg8a\_ d4qxaa\_  
d2ew1a1 d1x1ra1 d2bcgy\_ d3doea1 d3cona\_ d3rega\_ d3wyga\_ d1upta\_  
d2b6ha1 d1zd9a1 d1lnza2 d1r5ba3 d1n0ua2 d1r2qa\_ d2f91a1 d2rhda\_  
d3q3jb\_ d3q85a\_ d1efma1 d1r8qa\_ d2gf9a1 d2akab1 d1ek0a\_ d1z08a1  
d2gcoa1 d2dy1a2 d4g01b\_ d2cxxa1 d1svia\_ d3q72a\_ d1ni3a1 d4ac9a4  
d2erxa1 d2bmea\_ d1wxqa1 d2gf0a1 d4ldja1 d1zunb3 d4lv5b\_ d1efca3  
d1kmqa\_ d2g6ba1 d3lrpa\_ d1tada2 d2y8ea\_ d4rd4a1 d1z06a1 d2heia\_  
d3a58b\_ d1u01a2 d1d2ea3 d1zj6a1 d2ocba\_ d3rwoa\_ d1mr3f\_ d2e9sa1  
d4u5xa1 d2iwra\_ d2fn4a1 d3bwdd\_ d2nzja1 d2atva1 d2ksqa\_ d3l43a\_  
d1mkya2 d1mkya1 d1wmsa\_ d1jnja3 d2rmka\_ d1f6ba\_ d1f60a3 d1gota2  
d1jala1 d2fh5b1 d1g16a\_ d2wblc\_ d1m7ba\_ d1wf3a1 d1f5na2 d1t9ha2  
d1z6xa1 d1z0aa1 d2fg5a1 d2a5ja1 d2bcjq2 d1s0ua3 d1ky3a\_ d4y0va\_  
d4lhwa\_ d2qmea1 d2atxa1 d1egaa1 d1ryha\_ d1moza\_ d1nrjb\_ d2erya1  
d3bfka\_ d1puia\_ d1fzqa\_ d3j3az1 d3t5ga\_ d1shza2 d3defa\_ d2f7sa1  
d3raba\_ d3tsoa\_ d3aq4a\_ d2a17a1 d3sfva1 d3bc1a\_ d1y4wa1 d1liqca1

d1eb7a2 d1eb7a1 d1nmla2 d1nmla1 d1nira1 d1qksa1 d1hroa\_ d4gedb\_  
d3zooa\_ d1mz4a\_ d1gu2a\_ d1f1fa\_ d1dvva\_ d1c6ra\_ d1c75a\_ d1e29a\_  
d1gdva\_ d1cnoa\_ d1h32b\_ d1co6a\_ d2bh4x\_ d2aiua\_ d5cytr\_ d1jdl\_a\_  
d1i8oa\_ d2zboa\_ d3dmia\_ d1ls9a\_ d1wvec\_ d2yk3a\_ d3ph2b\_ d1dw0a\_  
d5aura\_ d1ql3a\_ d1qn2a\_ d1f1ca\_ d4zzva\_ d2xspa\_ d1eg1a\_ d4v20a\_  
d1ojja\_ d4ipma1 d4csia\_ d3pfza\_ d3ovwa\_ d2yoka\_ d2nqya\_ d1h4ga\_  
d1oa2a\_ d1olra\_ d3b7ma\_ d4h7ma1 d3wp3a\_ d2vgda\_ d1ligoa\_ d3zsea\_  
d2nlra\_ d3wx5a\_ d1oa3a\_ d1pvxa\_ d1m4wa\_ d1f5ja\_ d1oa4a\_ d1ks5a\_  
d4ixla1 d2a6za1 d3a4ua\_ d2a6va1 d1h32a2 d1evsa\_ d1cnt1\_ d1pvhb\_  
d1z7ca\_ d1huwa\_ d1bgea\_ d1rhga\_ d1f6fa\_ d1f45b\_ d1i1rb\_ d1axia\_  
d1etea\_ d3tgxb\_ d1scfa\_ d2z3qa1 d3qb1a\_ d1hula\_ d1m48a\_ d4nkqb\_  
d1eera\_ d1v7mv\_ d5e4ea\_ d2o27a\_ d3b5ka\_ d2psma1 d4zf7a\_ d3uf5a\_  
d4x51a\_ d1d9ca\_ d4ypgc1 d3oq3a\_ d1lqsl\_ d1n1fa\_ d1aula\_ d1wu3i\_  
d3bes1\_ d3ux9a\_ d2ejca\_ d3muea1 d1ihoa\_ d3q12a1 d4dnxa2 d1m8pa2  
d1v47a2 d1g8fa2 d1x6va2 d3rbaa\_ d2qtra\_ d1nupa\_ d3l92a\_ d1f9aa\_  
d1qjca\_ d2h29a\_ d1vlha\_ d1od6a\_ d1mrza2 d4ruka\_ d2el7a\_ d1iq0a2  
d1irxa2 d1r6ta2 d1ivsa4 d2cyba\_ d1rqga2 d1j09a2 d2yxna\_ d1f7ua2  
d1ffya3 d2g36a1 d1nzja\_ d1jila\_ d1n3la\_ d1i6la\_ d1pfva2 d1h3na3  
d3n9ia\_ d3sz3a1 d3sw2a\_ d1moxc\_ d1dx5i3 d1edmb\_ d1autl2 d1autl1  
d1nqlb\_ d1dval1 d1szba2 d1kigl\_ d2y5f1\_ d1ijqa2 d1gk5a\_ d1g1sa2  
d1nt0a3 d1xdtr\_ d1lmja2 d1lmja1 d1nzia2 d2wphe\_ d1klil\_ d1pfxl2  
d1pfxl1 d1p9ja\_ d1g1ta2 d1f7ea\_ d4yzub\_ d1m1xb5 d2y5ia\_ d1qlsa\_  
d1psra\_ d3n22a\_ d2egda\_ d4ggfc\_ d2wcea\_ d2luca\_ d4aqia\_ d3nsia\_  
d2lp3a\_ d1j55a\_ d1a4pa\_ d1k8ua\_ d1nsha\_ d1tiza1 d1nyaa\_ d1g8ia\_  
d1ggwa\_ d1wdcc\_ d3fwba\_ d1ggza\_ d2o5ga\_ d1ctaa\_ d1m45a\_ d3i5gc\_  
d1s18a\_ d1fpwa\_ d2scpa\_ d2roaa\_ d4aqra\_ d3pn7b\_ d1br1b\_ d2mysb\_  
d1s6ca\_ d1bjfa\_ d2obha\_ d1jfka\_ d1jf0a\_ d1qv0a\_ d1lkja\_ d2mlfc\_  
d2m97a\_ d2d8na\_ d4by5a\_ d1jbaa\_ d4nqga\_ d1wdcb\_ d2mysc\_ d1j7qa\_  
d1s6ia\_ d1uhka2 d1r2ua\_ d1dtla\_ d3kf9a\_ d3pn7c\_ d1qjta\_ d1fi6a\_  
d1c07a\_ d5d67d\_ d1tuza\_ d1h8ba\_ d1eg3a1 d2zkmx1 d1snla\_ d1gjya\_  
d1y1xa\_ d1hqva\_ d1dvia\_ d1df0a1 d1qxp2 d4usla\_ d1k94a\_ d1wkya2  
d1uuqa\_ d3wh9a\_ d4m1ra\_ d1xyza\_ d4xuya\_ d2je8a5 d4bf7a1 d3cuia\_  
d1ur4a\_ d1qw9a2 d1odza\_ d2vzsa5 d1bqca\_ d2x2ya1 d1hjqa\_ d1qnra\_  
d4y7ea1 d1vjza\_ d4k68a\_ d2v3ga\_ d4hpga\_ d1nofa2 d1nq6a\_ d1h4pa\_  
d1aq0a\_ d3ziza\_ d4bs0a\_ d1ecea\_ d1h1na\_ d1ta3b\_ d1w91a2 d1i1wa\_  
d1uhva2 d1us3a2 d1legza\_ d7a3ha\_ d1tvna1 d3nyda1 d1ghsa\_ d2cyga1  
d4xv0a\_ d2c8na2 d1w32a\_ d3emca\_ d1v6ya1 d1foba\_ d2uwfa1 d2fgla\_  
d3niya1 d2c0ha1 d1rh9a1 d1yq2a5 d1szna2 d1fa2a\_ d1pama4 d5do8a1  
d1ea9c3 d1hx0a2 d2fhfa5 d1qhoa4 d1avaa2 d1m53a2 d4m8ua1 d2gjpa2  
d1lwha2 d4howa1 d1ktba2 d1j0ha3 d3vm5a1 d2x1ia\_ d1wzaa2 d1uasa2  
d2diea1 d1mxga2 d1ht6a2 d1eswa\_ d1iv8a2 d5cpsa\_ d1ud2a2 d1zjaa1  
d3gbea1 d1kwga2 d1wdpa\_ d1gcya2 d1g5aa2 d1hvxa2 d3dhpa2 d2bhua3  
d4do4a1 d3qgva1 d1e43a2 d1g94a2 d2d3na2 d1gjwa2 d1gvia3 d1x1na1  
d1r7aa2 d1tz7a1 d4toqa\_ d1wb0a1 d1w9pa1 d1eoka\_ d1itxa1 d1kfwal



d1goia2 d1ledqa2 d2gsja\_ d1hjxa1 d1jnda1 d1vf8a1 d1etob\_ d1umqa\_  
d1g2ha\_ d1mixa2 d1j19a2 d1isna2 d2a16b2 d1id1a\_ d2hmta\_ d1iuka\_  
d2csua1 d3q9ub\_ d2yv1a1 d3q9na\_ d2d59a\_ d1oi7a1 d2yv2a1 d1y81a1  
d3nvva1 d1krha3 d2h88b1 d1n62a2 d1t3qa2 d1kf6b2 d1zoyb1 d1jq4a\_  
d1ffva2 d1dgja2 d1rm6c2 d1h6ua1 d9ldta1 d2ewda3 d1up7a1 d2dfda1  
d1s6ya1 d1vjta1 d7mdha1 d1hyea1 d1t2da1 d1ojsa3 d1b8pa1 d1ldna1  
d1hyha1 d1civa1 d2a92a1 d1ez4a1 d1i0za1 d1y6ja1 d1gv0a1 d1ur5a1  
d1llda1 d1obba1 d1v8ba1 d1gdha1 d1l7da1 d2dlda1 d1mx3a1 d1ygya1  
d1qp8a1 d1j4aa1 d2naca1 d1npya1 d3t4ea2 d1a4ia1 d1o0sa1 d2hk9a2  
d2egga2 d1b26a1 d1bvua1 d1gq2a1 d1c1da1 d1leha1 d1gtma1 d1euzal  
d1nvtal d3dona2 d1ledza1 d1gpja2 d1vi2a1 d1p77a1 d1b0aa1 d1vl6a1  
d1v9la1 d1txga2 d3f47a1 d1mv8a2 d2pv7a2 d1xc2a3 d2ahra2 d4xiya1  
d2f1ka2 d1pgja2 d1i36a2 d1np3a2 d1l1j8a4 d1teaa3 d1qmg2 d2i76a2  
d2g5ca2 d1wdka3 d1dlja2 d3cuma3 d1kola2 d1f8fa2 d1qora2 d1jqba2  
d1vj0a2 d1cdoa2 d1gu7a2 d1d1ta2 d1xa0a2 d2dm6a2 d1jvba2 d1rjwa2  
d1llua2 d1h2ba2 d1tt7a2 d1piwa2 d1o89a2 d1iz0a2 d1e3ja2 d1yb5a2  
d1uufa2 d1e3ia2 d3gpdg1 d1vc2a1 d2nvwal d1u8fo1 d1ydwal d1hdgo1  
d2g17a1 d1cf2o1 d2czca2 d1r0ka2 d1obfo1 d2cvoa1 d1ebfa1 d1h6dal  
d1i32a1 d1zh8a1 d2q49a1 d1qkia1 d1j5pa4 d3pzra1 d1xeaa1 d1vkoa1  
d1vm6a3 d3qvsa1 d2pkqo1 d1b7go1 d1gr0a1 d1p1ja1 d1lc0a1 d1j0xo1  
d3pwka1 d2hjsa1 d1zyao1 d1vkna1 d1t1ta1 d1nvm1 d3sjua\_ d3ojfa1  
d1xu9a1 d2jjya1 d1n7ha\_ d1y1pa1 d1h5qa\_ d1jtva\_ d4fs3a\_ d2bkaa1  
d1gy8a\_ d2c5aa1 d1ulsa\_ d1ooea\_ d2b69a1 d1y5ma1 d1spxa\_ d1aela\_  
d1bxka\_ d1ydea1 d1gega\_ d1hdoa\_ d1o5ia\_ d1e6ua\_ d1snya1 d2rhca\_  
d3zv4a\_ d5ceja\_ d2d1ya1 d3w8ea\_ d2fmua1 d1x1ta\_ d1rpna\_ d3ay7a1  
d1k2wa\_ d1eq2a\_ d2hrba1 d3ruaa\_ d2ew8a1 d4hwka\_ d1xgka\_ d2bd0a1  
d1yo6a1 d2a35a1 d2ntva\_ d1vl8a\_ d1hdca\_ d4bkua\_ d2ag5a1 d2q45a\_  
d1nffa\_ d4iy1a\_ d1zbqa1 d1kewa\_ d1ek6a\_ d1ja9a\_ d2q46a2 d1iy8a\_  
d1cyda\_ d2ptga\_ d1hxha\_ d1uzma1 d3lyla\_ d4m89a\_ d3wyea\_ d2b1la1  
d1w6ua\_ d1sb8a\_ d2q2va\_ d4nr0a\_ d1e6wa\_ d2gasa\_ d3oiga1 d2bgka1  
d1mxha\_ d1vl0a1 d1rkxa\_ d1r6da\_ d1wmaa1 d1e7wa\_ d2c07a1 d1xkqa\_  
d3tzha\_ d1g0oa\_ d3l26a\_ d1qyca\_ d1ledoa\_ d1gz6a\_ d1oc2a\_ d1t2aa\_  
d1zema1 d2xoxa\_ d1z45a2 d1geea\_ d1p33a\_ d3lt0a\_ d4e6pa\_ d2wyua\_  
d1db3a\_ d4q9na\_ d1xhla\_ d4o1ma\_ d1fmca\_ d2uvda\_ d2gdza1 d1uaya\_  
d2z1ma\_ d2o23a2 d2fr1a2 d2fr1a1 d1qsga\_ d1qyda\_ d4zjua\_ d2a4ka1  
d1yb1a\_ d1wvga1 d1yxma1 d3f4ba\_ d1mg5a\_ d1xg5a1 d1r55a1 d3gboa\_  
d1atla\_ d1kufa\_ d4q1la\_ d1quaa\_ d1yp1a\_ d1wnia\_ d4ekfa\_ d2ckga\_  
d1th0a\_ d2bkra\_ d4c5pa\_ d2bsza1 d4bgfa\_ d1w4ta1 d1ex0a4 d1g0da4  
d2f4ma1 d1x3za\_ d3ulra1 d1g9ka2 d1k7ia2 d3ioqa\_ d1fh0a\_ d1o0ea\_  
d1khqa\_ d1m6da\_ d2cb5a\_ d1cs8a\_ g8pch.1 d1s4va\_ d2pnsa\_ d1vsna1  
d1mira\_ d1liwda\_ d2oula\_ d7pcka\_ d3bwka\_ d3bcna\_ d2p86a\_ d1pvja\_  
d1pcia\_ d1gece\_ d1deua\_ d4bs6a\_ d1xkga1 d1cqda\_ d1jqpa2 d2c0ya\_  
d2bdza\_ d3p5ua\_ d1zoya1 d1qo8a2 d1d4ca2 d1chua2 d1jnra2 d2jk6a2  
d2jk6a1 d1feca1 d1feca2 d1lpfa1 d1lpfa2 d1xhca1 d1xhca2 d1dx1a2

d1dyla1 d1gera2 d1m6ia2 d1onfa1 d1onfa2 d3lada2 d3lada1 d1w4xa1  
d1w4xa2 d1gesa2 d1mo9a1 d1xdia1 d1fl2a2 d1fl2a1 d1fcda1 d1fcda2  
d1h6va2 d1h6va1 d1mo9a2 d1gv4a2 d1gv4a1 d2gv8a2 d2gv8a1 d1aoga1  
d1aoga2 d1hyua1 d1ebda1 d1ebda2 d3dk9a1 d1qlra2 d1qlra1 d1gesa1  
d1pv8a\_ d1w5qa\_ d2c1ha\_ d1ohla\_ d1pn0a1 d1reoa1 d1ju2a1 d2f5va1  
d3c96a1 d2gmha1 d1pj5a2 d1gpea1 d1o5wa1 d1n4wa1 d1k0ia1 d2dw4a2  
d2ivda1 d2voua1 d1kdga1 d1s5ja1 d2hbja2 d2igia\_ d1wlja\_ d1qhta1  
d4dlea1 d2f96a1 d3tr8a1 d3mxma\_ d1q8ia1 d1y97a1 d1w0ha\_ d1kfsa1  
d2py5a1 d1noya\_ d1d5aa1 d1yt3a3 d2guia\_ d3mwpal d4kb1a\_ d2y8ga\_  
d1xkea1 d1k5db\_ d2y8fa\_ d1iv0a\_ d1nu0a\_ d2d5ra1 d1b9ra\_ d1offa\_  
d1frfa\_ d3wcqa\_ d1e9ma\_ d1l5pa\_ d1wria\_ d1i7ha\_ d3av8a\_ d1czpa\_  
d1rfka\_ d3plma1 d3b2ga\_ d2bt6a2 d1wgqa1 d1v89a1 d2coda1 d1zc3b\_  
d1wg7a1 d1u5ea1 d1v61a1 d2coca1 d2ys1a1 d1v5pa1 d1ntya2 d1wjma1  
d1wila1 d1u29a\_ d1xx0a1 d1unqa\_ d2zkmx3 d1fhoa\_ d1v88a1 d2adza1  
d1x1fa1 d1p6sa\_ d2coaa1 d1btka\_ d1v5ma1 d1faoa\_ d2x18a\_ d1dyna\_  
d1x1ga1 d4kaxb\_ d2j59m1 d1ki1b2 d1xcga2 d1txda2 d1u5da1 d1dbha2  
d1wlha\_ d1upqa\_ d1v5ua1 d1foea2 d2fjla1 d1eaza\_ d2dfka2 d2cofa1  
d1kz7a2 d1k8ka2 d1k8ka1 d3uleb1 d3i33a2 d3i33a1 d1bupa1 d1dkgd2  
d1dkgd1 d4ci6a2 d1jcfa1 d4a2ba2 d2fxua1 d1yaga2 d1yaga1 d4cbua2  
d1bupa2 d1r7ha\_ d1faaa\_ d1wika1 d1xfla\_ d1ttza1 d2f51a1 d1ti3a\_  
d1nhoa\_ d1sena\_ d2i4aa\_ d1ep7a\_ d1zmaa1 d1fo5a\_ d3lefa1 d3diea1  
d2yana1 d1z6na1 d1oaza\_ d3zywa1 d4aj8a\_ d1nm3a1 d4fiwa\_ d1wmja\_  
d4hs1a1 d1liloa\_ d1xwaa1 d1wjka1 d2vmla\_ d1fb6a\_ d1gh2a\_ d1h75a\_  
d1nw2a\_ d1kx5b\_ d3a6na\_ d4m6ba2 d2nqbd\_ d3wkjd\_ d2yfwe\_ d4h9na\_  
d5bnxa\_ d1kx5c\_ d3r45a\_ d1eqzb\_ d4jjnb\_ d1f66c\_ d1eqza\_ d4wnnb\_  
d1kx5a\_ d1u35c1 d1id3a\_ d2nqbc\_ d1kx5d\_ d1ku5a\_ d1b67a\_ d1tafa\_  
d1bh9b\_ d1tafb\_ d1jfib\_ d1q9ca\_ d1h3ob\_ d2byka1 d1n1ja\_ d4g92b\_  
d1bh9a\_ d1h3oa\_ d2bykb1 d1n1jb\_ d1pd212 d1nhya2 d2a2ra2 d1k0dd2  
d1f2ea2 d1gsua2 d1f3ba2 d2fhea2 d2pvqa1 d1tw9a2 d1oyja2 d1e6ba2  
d1k0ma2 d3ik7a1 d4is0a1 d1r5aa2 d1j1va2 d1m0ua2 d3gtub2 d1z9ha2  
d1okta2 d1axda2 d2gsra2 d1tu7a2 d1k3ya2 d1zgma1 d1b48a2 d1gnwa2  
d1gwca2 d2gsta2 d1glqa2 d1oe8a2 d1pn9a2 d1v2aa2 d1fw1a2 d1duga2  
d1ig8a1 d1czan2 d1czan3 d1czan1 d1ig8a2 d1czan4 d1bg3a4 d1bg3a3  
d1bg3a2 d1bg3a1 g1f8v.1 d1novc\_ d2bbvc\_ d1qusa\_ d3wyha\_ d4g9sa1  
d3gxra\_ d1qqya\_ d1gd6a\_ d1f6ra\_ d1livma\_ d2gv0a\_ d1iiza\_ d2z2fa\_  
d1j8xa\_ d1ghla\_ d1b9oa\_ d1741a\_ d1691a\_ d2o4wa\_ d1p37a\_ d1k28a3  
d1xjta1 d1jtma\_ d2f2qa\_ d4e97a1 d1mpya2 d1kw3b1 d4ghga1 d1tfza1  
d3isqa1 d3isqa2 d1sqia1 d1sqia2 d1lkda2 d1lkda1 d1mpya1 d1cjxa2  
d1cjxa1 d1sp9b2 d1t47a1 d1t47a2 d1flua2 d1sp8a1 d1sp8a2 d1flua1  
d2bema\_ d1pama1 d1ea9c1 d1qhoa1 d2fhfa2 d2fhfa1 d1k3ia1 d1j0ha1  
d1cxla1 d2bhua1 d1edqa1 d1flsa2 d1ut9a2 d1gvia1 d1txka1 d1s5ja2  
d1qhta2 d4dlea2 d1tgoa2 d3py8a2 d1q8ia2 d1kfsa2 d2py5a2 d1d5aa2  
d1qsta\_ d2beia1 d4m3sa\_ d1u6ma1 d1ygha\_ d1yk3a1 d3dr6a\_ d1xmta\_  
d1z4ea1 d2ge3a1 d1bo4a\_ d2fiaa1 d2jdca1 d1y9wa1 d3to7a\_ d1wwza1

d2f14a1 d2ozua1 d2b5ga\_ d2cy2a1 d2p0wa\_ d1cm0a\_ d4pswa\_ d1yreal  
d1yr0a1 d1m4ia\_ d2gana1 d1yvka1 d1ghea\_ d2g3aa1 d1y7ra1 d2euia1  
d1q2ya\_ d2fsra1 d1xeba\_ d2ae6a1 d1cjwa\_ d1qsma\_ d2aj6a1 d1y9ka1  
d1vkca\_ d2atra1 d1n71a\_ d2d4pa1 d2fiwa1 d2fe7a1 d1tiqa1 d2ou2a\_  
d1yx0a1 d2fcka1 d1p0ha\_ d2j8ma\_ d2pq8a\_ d1z4ra1 d1s3za1 d1ufha\_  
d1xvqa1 d1pn0a2 d3hy2a\_ d2cvba1 d1o8xa\_ d1lu4a\_ d1we0a1 d2bmx1  
d2a4va1 d1psqa\_ d1xiya1 d1n8ja\_ d1zofa1 d2ggta\_ d3tjja\_ d4je1a1  
d1o73a\_ d3s9fa\_ d2zcta\_ d1qmva\_ d1jfu1 d2b1ka\_ d5dvba1 d2b5xa1  
d2v2ga\_ d1st9a\_ d3tb2a\_ d4llra\_ d4fh8a1 d1e2ya\_ d1knga\_ d2h30a\_  
d1i5ga\_ d2z9sa\_ d2f8aa1 d1tp9a1 d2b7ka\_ d1nm3a2 d3hvva\_ d2wfc1  
d4kcea\_ d1xvwa1 d4gqca1 d3qpma\_ d4k1fa\_ d1zzoa1 d1gpla\_ d1prxa\_  
d4od7a1 d1z6ma1 d4mcua1 d4dvca1 d1r4wa\_ d3l9sa\_ d1un2a\_ d3rppa\_  
d1f74a\_ d3l21a\_ d2e1da\_ d1to3a1 d1w3ia\_ d1sfla\_ d1n7ka\_ d1vcva1  
d4imea\_ d1wa3a\_ d2ocza1 d1f2ja\_ d3m16a\_ d2yxga\_ d1ub3a\_ d3a5fa\_  
d1fbaa\_ d1l6wa\_ d1xfba1 d1wx0a1 d1vpxa1 d1mxsa\_ d2a4aa1 d1xkya1  
d3cq0a1 d3s1xa\_ d1f05a\_ d1fdja\_ d3cpra1 d4d2ja\_ d1e88a1 d1l6ja5  
d1l6ja4 d1eaka4 d1eaka3 d1l6ja3 d1h8pa2 d1h8pa1 d1etha2 d1w52x1  
d2ppla1 d1hpla2 d1lpbb2 d2oxea1 d1bu8a2 d1rpla2 d1ys1x\_ d4hs9a\_  
d1ispa\_ d1ex9a\_ d1ku0a\_ d3qmma\_ d2h1ia1 d2r8ba1 d3b5ea1 d3cn9a\_  
d4l3wa\_ d1llfa\_ d1gz7a\_ d1ukca\_ d1c4xa\_ d2rhwa\_ d1svpa\_ d1mbma\_  
d3su6a1 d1cula1 d4agka\_ d1vcpa\_ d1q31a\_ g1n11.1 d3e90b\_ d1ep5a\_  
d3uljb\_ d2ddfa\_ d3zxha\_ d1cgl1 d1rm8a\_ d1leaka2 d1hy7a\_ d2jsda\_  
d1cxva\_ d1hv5a\_ d1i76a\_ d1g12a\_ d3p0ya1 d1igra1 d1igra2 d1n8yc1  
d1m6ba2 d1m6ba1 d1dzka\_ d4tlja\_ d2a2ua\_ d4wfva\_ d3t1da\_ d4i1axa\_  
d3zq3a\_ d2nnda\_ d1i4ua\_ d1kxoa\_ d1bbpa\_ d1kt7a\_ d1lexsa\_ d3s26a1  
d1l17a\_ d1qfta\_ d4gh7a\_ d1z24a1 d1qabe\_ d1xkia\_ d1lew3a\_ d3bx7a\_  
d4iawa1 d1n0sa\_ d1gkab\_ d3kzaa\_ d2k23a\_ d2l9ca1 d2joza1 d1gm6a\_  
d3kffa\_ d3saoa1 d1e5pa\_ d1yupa1 d1liua\_ d1h6ta2 d1h6ua2 d2tbvc\_  
d1c8nc\_ d1x36a\_ d1smvc\_ d1ng0c\_ d4sbvc\_ d1f2nc\_ d1cixa\_ d1y29a\_  
d1v7fa\_ d2jtba\_ d1d1ha\_ d1g9pa\_ d1lupa\_ d1qk7a\_ d1mb6a\_ d2a2va\_  
d1niya\_ d1hvwa\_ d2mpqa\_ d1ie6a\_ d1kqha\_ d1la4a\_ d2mxoa1 d1dl0a\_  
d1koza\_ d1qk6a\_ d1emxa\_ d1lqra\_ d1c6wa\_ d1rmka\_ d1ixta\_ d1eyoa\_  
d1cna\_ d1fu3a\_ d1g1pa\_ d1f3ka\_ d1rypd\_ d1irua\_ d1rypc\_ d3unfk\_  
d1rypa\_ d1j2pa\_ d1irui\_ d1j2qh\_ d3unfh\_ d1m4ya\_ d1rypb\_ d1lirul\_  
d1lirug\_ d1liru2\_ d1q5rh\_ d1rypg\_ d1g3ka\_ d1liruf\_ d1q5qa\_ d1lirub\_  
d1ryph\_ d3ty6a\_ d1liruj\_ d1liruk\_ d1rype\_ d1lirud\_ d1lirue\_ d3mi01\_  
d1rypf\_ d1liruh\_ d2z3ba\_ d1liruc\_ d3mka2\_ d1liru1\_ d1ny721 d1ny722  
d1a6ca3 d1a6ca2 d1a6ca1 d1pgl22 d1pgl21 d1pgl11 d1ny711 d1jgta2  
d1ea0a3 d1ecfa2 d1q15a2 d1ct9a2 d1ao0a2 d1te5a\_ d4w9ta\_ d4x2ra1  
d1ka9f\_ d1qo2a\_ d4axka1 d1thfd\_ d1h5ya\_ d4u28a\_ d2y88a\_ d4wd0a\_  
d1vzwa1 d1eixa\_ d3exra\_ d2ffca1 d2fdsa1 d3n3ma1 d2czda\_ d1q6oa\_  
d2yyua\_ d1vqta1 d1dbta\_ d3ldva1 d2flia1 d1h1ya\_ d1tqja\_ d1tqxa\_  
d2r80b\_ d1cqxa1 d1gcvb\_ d3boma\_ d2h8fb\_ d2raoa\_ d3bj1a\_ d4hrrb\_  
d2r50a\_ d3d1kb\_ d2aa1b1 d3zhwa\_ d3hf4b\_ d3gdja\_ d1jebb\_ d3bj1b\_

d1x9fb\_ d1wmub\_ d1gcva\_ d3bcqb\_ d3d4xb\_ d1gvha1 d2dc3a\_ d3hf4a\_  
d4yu3a\_ d3k8ba\_ d1qpwb\_ d2r80a\_ d3bcqa\_ d1v4wa\_ d3wtgb\_ d1jl7a\_  
d4esaa\_ d1a9we\_ d3d1ab\_ d1fsla\_ d4h21a\_ d1v4wb\_ d1mwca\_ d1vhba\_  
d1jeba\_ d1spgb\_ d1h97a\_ d1q1fa\_ d1tu9a1 d3d1aa\_ d1hdsb\_ d3hyub\_  
d2zfb\_ d3fs4a\_ d1oj6a\_ d1shrb\_ d4h21b\_ d4yu3b\_ d1spga\_ d3hrwa\_  
d3qqra\_ d3at5a\_ d4wchd\_ d3hyua\_ d1cg5b\_ d1uc3a\_ d1hbra\_ d2raob\_  
d1outb\_ d4esab\_ d3gdjb\_ d3qqqa\_ d1x9fc\_ d3vrfa\_ d1litha\_ d3mkba\_  
d3d4xa\_ d3mjpa\_ d1jl6a\_ d3fh9a\_ d1outa\_ d2dc3b\_ d1lit2a\_ d3eoka\_  
d3g46a\_ d1qpwa\_ d3vrfb\_ d1ch4a\_ d1x9fd\_ d1hdsa\_ d2zfa\_ d3mkbb\_  
d1or4a\_ d3wtga\_ d1a4fa\_ d3fh9b\_ d3bomb\_ d3cy5a\_ d3at5b\_ d1x9fa\_  
d2oifa\_ d4lmb\_ d1cpcb\_ d3v57a\_ d1cpc\_ d4f0ta\_ d2vjha\_ d4po5b\_  
d1eyxa\_ d1alla\_ d4f0tb\_ d1b33b\_ d1b8db\_ d4h0mb\_ d1b33a\_ d2vjhb\_  
d4lmb\_ d2vmlb\_ d1allb\_ d2vjta\_ d3dbja\_ d2vmla\_ d2vjtb\_ d4f0ub\_  
d1f99b\_ d4rmpa1 d1liaa\_ d1eyxb\_ d2uulb\_ d4lmsb\_ d4f0ua\_ d2bv8a\_  
d1f99a\_ d2bv8b\_ d2c71b\_ d3dbjb\_ d4rmpb1 d1b8da\_ d4h0ma\_ d3v57b\_  
d1kn1b\_ d1liab\_ d2uula\_ d2j96a\_ d3ia2a\_ d1a88a\_ d4dgqa1 d1hkha\_  
d1zoia\_ g1wht.1 d3nqyb\_ d4gera\_ d1bqba\_ d1k8qa\_ d2xqfa\_ d1ea5a\_  
d1f6wa\_ d1dx4a\_ d1qe3a\_ d1k4ya\_ d4qwwa\_ d2ha2a\_ d1jmx4 d1jmx3  
d1pbya3 d4iuua3 d4bvva\_ d5hpga\_ d3k65a\_ d1ki0a3 d1ki0a2 d1ki0a1  
d1pmla\_ d3sp8a3 d2feba1 d1mdwa\_ d1qxp4 d1ziva1 d1zcm1 d2m5ta\_  
d1cqq\_ d1wqsa\_ d5bpea\_ d2ipha\_ d1lvoa\_ d2bhga1 d3tnta\_ d3sjia\_  
d3d23a1 d2fyqa\_ d3tloa\_ d3zvea1 d2hrva\_ d3q3ya1 d4asha1 d4mh8a\_  
d1mu2a2 d4i7ga1 d3rp2a\_ g1lucy.1 d1fuja\_ d2zchp\_ d3w94a\_ d1si5h\_  
d1lo6a\_ g2pka.1 d1cgha\_ d1kigh\_ d1a5ia\_ d3s9ba\_ d1hj8a\_ d1ao5a\_  
d2anya\_ d1q3xa1 d1gvza\_ d1azza\_ d4gsoa\_ d2f91a1 d1iaua\_ d1gdna\_  
d1eufa\_ g1fiw.1 d1eq9a\_ d4nfea\_ d2rdla\_ d1spja\_ d1elva1 d1a7sa\_  
d1ekbb\_ d1pfx\_ d1yc0a\_ d2aiqa\_ g1fiz.1 d1fi8a\_ d4k60a\_ d4dgja\_  
d1mzaa\_ d1op0a\_ d3tjva\_ d1pytd\_ d1sgfg\_ g1gg6.1 d2eeka\_ g1rtf.1  
d1a0ja\_ d3g01a\_ d1pytc\_ d4e7na\_ d1ddja\_ d1z8ga1 d2hlca\_ d1npma\_  
d1brup\_ g1jou.1 d1sgfa\_ d1autc\_ g2hnt.1 g1kdq.1 d3s69a\_ d4crga\_  
d1fxya\_ d1bqya\_ d1ra6a\_ d1muka\_ d3gsza\_ d1khva\_ d1te9a\_ d2xwha\_  
d3uqsa\_ d3hkwa\_ d3n6ma\_ d2cjqa\_ d2xyma\_ d1teba\_ d1te8a\_ d1s48a\_  
d1u09a1 d4wfxa\_ d3tyqa\_ d2pgga1 d1m4la\_ d2bk7a\_ d3fjua\_ d1z5ra1  
d1kwma1 d1jqga1 d2c1ca1 d1dtda\_ d1h8la2 d3lgia\_ d3i77a\_ d2z9ia2  
d4nsva\_ d1lcya2 d4jcna\_ d1agja\_ d1os8a\_ d1hpga\_ d1l1ja\_ d1qtfa\_  
d1e69a\_ d3g60a4 g1ii8.1 d1ewqa2 d1ji0a\_ d1qhla\_ d1v43a3 d2wmfa1  
d1vpla\_ d1g2912 d4a82a2 g1f2t.1 d2d62a1 d3tuic1 d2bbsa1 d3g60a3  
d2ixea\_ d1g6ha\_ d1sgwa1 d2qi9c\_ d3rlfa1 d3b60a1 d3d31a2 d2pzea1  
g1xew.1 d1jj7a\_ d1oxk2 d2onka1 d1wlwa\_ d1iwea\_ d1qf5a\_ d1vmaa2  
d1nija1 d1np6a\_ d2p67a1 d3ihla\_ d1okkd2 d1ls1a2 d1s1ma2 d1liona\_  
d2v40a\_ d1dj3a\_ d3hida\_ d2vo1a1 d2g0ta1 d1vcoa2 d1j8mf2 d1g3qa\_  
d1xjca\_ d1p9ba\_ d1qzxa3 d1ihua2 d1ihua1 d2qm8a\_ d1dj2a\_ d4ioja\_  
d1cp2a\_ d1yrba2 d3gqba2 d1skye3 d1xp8a1 d1tf7a2 d1tf7a1 d1ye8a1  
d1skyb3 d2qe7d2 d4blta\_ d4huta\_ d3l1daa2 d4hyya\_ d2i3ba1 d1crla\_

d3j9tb2 d3ntua2 d1vdza1 d2z43a\_ d1e9ra\_ d1nlfa\_ d3ziaa2 d1n0wa\_  
d1g6oa\_ d3ziad2 d3j9ta2 d1pzna2 d3gqbb2 d2i49a\_ d1nnfa\_ d1xvxa\_  
d1ursa\_ d1h3da1 d1iuda\_ d4m1va1 d1twya\_ d3e13x\_ d2nxoa1 d4pfua\_  
d3ttma\_ d1elja\_ d2qmw1 d1us5a\_ d1y3na1 d1jeta\_ d1uqwa\_ d4f19a1  
d2esna2 d3thia\_ d3fasa1 d2uyeb\_ d2xwva1 d1r9la\_ d2fyia1 d1pb7a\_  
d2ozza1 d1sw5a\_ d1nh8a1 d1vr5a1 d2g29a\_ d1xs5a\_ d3lswa\_ d2z23a\_  
d3w9va\_ d3tcha\_ d1z7me1 d3q27a\_ d1p99a\_ d1ve4a1 d2i6ea1 d4mcoa1  
d4n8ya\_ d1eu8a\_ d1zbma1 d1hsla\_ d1lixca2 d1j1na\_ d1xvya\_ d1y9ua\_  
d2z22a1 d1xoca1 d4oera\_ d1wdna\_ d5f1qa1 d1xt8a1 d1i6aa\_ d4gwoa\_  
d4igta1 d1pc3a\_ d4mmpa1 d1o63a\_ d2czla1 d2onsa2 d4mija1 d4ok5a1  
d2bmfa1 d2bmfa2 d1yksa1 d1yksa2 d1jr6a\_ d2qeqa1 d2jlqa1 d1a1va2  
d1eh3a\_ d3skpa\_ d1dtza2 d1ieja\_ d1jnfa2 d1ce2a1 d1jnfa1 d1b1xa2  
d1b1xa1 d1jw1a1 d1jw1a2 d1ryoa\_ d1h76a1 d1h76a2 d1c4oa1 d2p6ra3  
d2p6ra4 d1oywa2 d1wrba1 d1w36b2 d1w36b1 d1c4oa2 d3bora\_ d1t6na\_  
d2eyqa5 d2eyqa3 d2eyqa2 d2zu6a2 d1veca\_ d1uaaa1 d1w36d1 d2g9na1  
d1z3ix2 d2rb4a\_ d1hv8a1 d1hv8a2 d1t5ia\_ d1w36c2 d2j0sa2 d2j0sa1  
d1fuka\_ d3hjha1 d1z5za1 d1qdea\_ d1z63a1 d1s2ma2 d1s2ma1 d1wp9a1  
d1wp9a2 d1gm5a3 d1gm5a4 d3dina4 d3dina3 d1q0ua\_ d1w36c1 d1z3ix1  
d1nkta3 d1nkta4 d1uaaa2 d1w36d2 g1qhh.1 d2fwra2 d2fwra1 d3q3ma\_  
d1za0a1 d1mxra\_ d2inca\_ d1jk0a\_ d2incb\_ d1mhyb\_ d3hflb\_ d1mtyb\_  
d1r2fa\_ d2uw1a\_ d1mhyd\_ d3n37a\_ d1oquc\_ d1syya\_ d1mtyd\_ d2o1za\_  
d1uzra\_ d1smsa\_ d2fkza\_ d1zuja1 d1s3qa1 d2fjca1 d1z6om1 d1veia\_  
d4dyya\_ d1jiga\_ d3gvya\_ d2pyba\_ d4cy9a1 d3bvfa1 d1r03a\_ d2cf7a\_  
d1nf4a\_ d1zs3a1 d4iwka\_ d3ka8a\_ d3np0x\_ d1n1qa\_ d1lb3a\_ d4e6ka\_  
d1z6oa1 d2fzfa1 d4dyua\_ d3ge4a\_ d1jgca\_ d4am4a\_ d2z6ma\_ d1ji5a\_  
d1vlga\_ d1lkoa1 d3qz3a\_ d1o9ra\_ d2ffxj\_ d1euma\_ d1yv1a1 d2v2pa\_  
d1j30a\_ d4di0a\_ d1dpsa\_ d1oewa\_ d2qzxa\_ d2asia\_ d1psoe\_ d1miqa\_  
d1smra\_ d2h6ta\_ d1lizda\_ d3hd8a\_ d1j71a\_ d1dpja\_ d4aa9a\_ d1t6ex\_  
g1b5f.1 g1lya.1 g1htr.1 d1qdma2 d1bxoa\_ d1wkra\_ d1tzsa\_ d1libqa\_  
d2qzwa\_ d1ex4a2 d1c6va\_ d2v76a\_ d1wj1a1 d1aqca\_ d1qqga2 d1qqga1  
d1ntva\_ d1n3ha\_ d4dbba\_ d3f0wa1 d1p3ra\_ d1wgua1 d2cy4a1 d3hqca\_  
d1wvha1 d1xr0b1 d1bdqa\_ d3ggta\_ d3ixoa\_ d1mrx\_ d2haha\_ d1tw7a\_  
d4njja\_ d1sgua\_ d2p3da\_ d1nsoa\_ d3d3ta\_ d2rkfa\_ d1c6ya\_ d2rspa\_  
d3ogpa\_ d3ekwa\_ d2o4na\_ d2j9ja\_ d1baia\_ d3ggua\_ d3lzua\_ d4npua\_  
d4j55a\_ d2r8na\_ d2fxda\_ d2p3ca\_ d4dqa\_ d3ttpa\_ d3t3ca\_ d2p3aa\_  
d2hc0a\_ d2fdda\_ d3mwsa\_ d1sr9a2 d1rqba2 d1h4ra3 d4yl8a1 d2a16a3  
d1wgda1 d1wgg1 d4q5eb\_ d1wjna1 d1se9a\_ d3n3kb\_ d1wz0a1 d1we6a1  
d2m0xa\_ d2gbka\_ d3rt3b1 d1wh3a1 d1sifa\_ d2ekek2 d4ii2b1 d4hk2a1  
d1c3ta\_ d1m94a\_ d1wgha1 d1ttna1 d1j8ca\_ d1wx8a1 d3v6cb1 d2ma9b\_  
d4i61b1 d1bt0a\_ d2jvca1 d1iyfa\_ d2k1fa\_ d1wxva1 d1wf9a1 d1t0ya\_  
d2io0b2 d1x1ma1 d2gbma\_ d1zw7a1 d2m17a\_ d1we7a1 d2lwp\_ d2gbja\_  
d1wjua1 d1v6ea1 d1v86a1 d4eewa\_ d1wiaa1 d4icva\_ d4gu2a\_ d1wx7a1  
d1wy8a1 d4hjka1 d2faza1 d1v5oa1 d2ftba\_ d1pmpa\_ d2rcqa1 d1fdqa\_  
d4lkpa\_ d1sa8a\_ d1vyfa\_ d1lpja\_ d3vg7a1 d4azqa1 d1o8va\_ d5bvqa\_

d1p6pa\_ d2qo4a\_ d1opba\_ d1yiva1 d1o1va\_ d4bvma1 d4tkba\_ d4i3ba\_  
d1bwya\_ d1ggla\_ d4gkca\_ d1cbia\_ d3p6da1 d1kqwa\_ d2a0aa1 d2bcgg1  
d2bcgg2 d1wioa4 d1ccza2 d1vcaa1 d1dr9a2 d1ic1a1 d2d9qb1 d2nxyb2  
d1um8a\_ d1lixza\_ d1qvra2 d1qvra3 d1qzma\_ d1sxjc2 d1jr3d2 d2p65a\_  
d1l8qa2 d1g8pa\_ d3hu3a3 d1sxjd2 d1njfa\_ d1in4a2 d1sxja2 d1tuea1  
d2ce7a2 d1w5sa2 d1sxjb2 d1d2na\_ d1ny5a2 d2gnoa2 d2a5yb3 d1fnna2  
d1u0ja1 d1lv7a\_ d1iqpa2 d2fnaa2 d1ixsb2 d4gita\_ d1sxje2 d1g41a\_  
d2lj7a\_ d1n4na\_ d2m8bb1 d2kyqa\_ d3psma\_ d1jkza\_ d1jxca\_ d2g11a\_  
d1ugla\_ d4uj0a\_ d2k4ua\_ d1hp2a\_ d2lu9a\_ d1baha\_ d2meoa1 d1wm7a\_  
d1hlya\_ d1n8ma\_ d1jlza\_ d1wpda\_ d1c55a\_ d1pvza\_ d1wt7a\_ d1wz5a\_  
d1m2sa\_ d1pjva\_ d1c49a\_ d1qkya\_ d2ktca1 d1wmta\_ d1du9a\_ d1j5ja\_  
d1rlga\_ d1t0za\_ d2i61a\_ d1t1ta\_ d1sn4a\_ d1kv0a\_ d2lkba\_ d1npia\_  
d1wwna\_ d1pe4a\_ d2kbka\_ d2li7a\_ d2kbha\_ d1dq7a\_ d1sega\_ d1omya\_  
d1zywa1 d1jzaa\_ d1n9wa1 d1bbua1 d1c0aa1 d1b8aa1 d1l0wa1 d3a74a1  
d1eova1 d1iyjb4 d1iyjb5 d1iyjb3 d1o7ia\_ d4ipca1 d1x3ea\_ d4apva\_  
d1jb7a1 d1jb7a2 d1jb7a3 d3kdfa\_ d1ue1b\_ d1wjja1 d3eiva\_ d1xjva2  
d1xjva1 d2ccza2 d1se8a\_ d1l1oc\_ d1jb7b\_ d1qvca\_ d3ulla\_ d1qzga\_  
d1miau4 d1miau5 d1miau3 d1y14b1 d2nn6i1 d1i94l\_ d2zjra2 d1smxa\_  
d2qamc2 d1hh2p1 d2r7da1 d1rl2a2 d1wfga1 d3bzka4 d1x6oa2 d3a0ja\_  
d2j01d2 d2ja9a1 d4q15a\_ d1hr0w\_ d1luza\_ d2n3sa\_ d2vnud1 d1h95a\_  
d1go3e1 d2nn6h1 d2mola\_ d1liz6a2 d1jjga\_ d1e3pa2 d2ix0a3 d2ix0a2  
d2lxja\_ d1ueba3 d1ueba2 d2z0sa1 d1u0la1 d2ix0a1 d2eifa2 d2je6i1  
d3i2za1 d2c35b1 d2ahob2 d1t9ha1 d3i4oa\_ d2qall1 d1jt8a\_ d2nn6g1  
d1g6pa\_ d3cama\_ d1i94q\_ d1c9oa\_ d1d7qa\_ d2ba0a1 d2vnud2 d2vnud3  
d1khia2 d2qalq1 d1wi5a1 d1xtda2 d1ny4a\_ d1dgsa2 d1fvia1 d1ckma1  
d1x9na2 d1rpma\_ d2shpa1 d1yfoa\_ d1l8ka\_ d2ooqa1 d1g4us2 d1p15a\_  
d1lara2 d1lara1 d1wcha\_ d2fh7a2 d2fh7a1 d1ohea1 d1ohea2 d2f4da\_  
d1rxda\_ d2hxpa\_ d1xria\_ d1d5ra2 d1fpza\_ d3ezza\_ d4y2ea\_ d1i9sa\_  
d3azya\_ d3wvja\_ d1upsa1 d1ajoa\_ d2hyka\_ d1ajka\_ d2vy0a\_ d1o4ya\_  
d3o5sa\_ d3d6ea\_ d3atga\_ d1umza\_ d3i4ia\_ d1c11a\_ d4lbqa\_ d1a78a\_  
d1slta\_ d4no4a\_ d3zsja\_ d3duia\_ d1g86a\_ d1is3a\_ d1qmja\_ d1hlca\_  
d1tdha3 d1q3ba3 d1ee8a3 d1k82a3 g1qmo.1 g1len.1 d3zyra\_ d1n47a\_  
g2ltn.1 d1avba\_ d3usua\_ d1dhkb\_ d1f9ka\_ d1lukga\_ d1g8wa\_ d1g9fa\_  
d1wbfa\_ d3wcsa\_ d1g7ya\_ g1loe.1 d1mvqa\_ d1hq1a\_ d1v6ia\_ d1dbna\_  
d1qnwa\_ d1fx5a\_ d4l8qa\_ d1ioaa\_ d3n35a\_ d3ubra\_ d1qo8a1 d1d4ca1  
d2k3va\_ d1qdba\_ d1mlqa\_ d2j7aa\_ d1h21a\_ d1ogyb\_ d4fasa\_ d1jnia\_  
d1oaha\_ d1sp3a\_ d2h0ba\_ d2erfa\_ d1h30a2 d3mw4a1 d1pz7a\_ d2rlba\_  
d3v64a1 d1d2sa\_ d3bopa1 d3mw3a1 d1okqa1 d1okqa2 d1dszb\_ d3cbba\_  
d1ynwa1 d1r4ia\_ d1hcqa\_ d2hana\_ d2hanb\_ d2enva1 d1kb4b\_ d2n11b\_  
d1lo1a\_ d1cita\_ d1adqa1 d1fnga1 d1uvqb1 d1zs8a1 d2vola1 d2vola2  
d1mfb12 d2jelh2 d1uwel2 d3qq4b1 d1kjbv\_ d1k5na1 d1osph2 d4odh12  
d1ow0a1 d1ow0a2 d1bfob2 d3l9ra2 d3jtth1 d2fath2 d4elkb2 d1fn4b2  
d2xfxb\_ d1pg7x2 d1cqka\_ d4k71b2 d1lk2a1 d1eapb2 d4lfhg2 d1i4fa1  
d2nw2a2 d1kfah2 d1mhca1 d1h3ua1 d1wejh2 d1h0db2 d1a5fh2 d1kcvh2

d1mjuh2 d1qqda1 d1kcrh2 d1k8ia1 d3huja2 d2nnab1 d1nfd2 d3mffb2  
d1s9va1 d1lk3h2 d1q0xl2 d1fv1b1 d1neza1 d4rfeb2 d1r3ha1 d1a6tb2  
d1kjsva1 d1pz5b2 d1onqa1 d2bc4a2 d1de4a1 d1k8da1 d1tcra2 d1dn0b2  
d1nfd2 d2xwtb2 d1bfoa2 d1mexh2 d1iakb1 d1ypzf2 d4f7ea2 d1q7212  
d2fbjh2 d1fe8h2 d1clzh2 d1fngb1 d1uvqa1 d1vgka1 d1c16a1 d4j12a2  
d4x99b2 d1igtb3 d1je6a1 d1q72h2 d1nldh2 d1teth2 d2hmic2 d1i1ca2  
d1i1ca1 d1k8ib1 d1q0yh2 d1kfa1 d3frua1 d1pg7w2 d1u58a1 d1igyb4  
d1igyb3 d1hyrc1 d1klub1 d1deeb2 d1c12b2 d2bc4b2 d2ig2h2 d1kcv12  
d3wn5b1 d1lk2b\_ d1lk312 d1mjul2 d1sm3h2 d1q0xh2 d1zvsal d1ydpal  
d1u8ib2 d1ypze2 d1kcu1 d1op9a\_ d1y0la1 d1etzb1 d1legj1 d2gsib1  
d1nj9a1 d4jfh1 d1aqk1 d1t2ja\_ d1lo4h1 d1zvya1 d3v4v1 d4enec1  
d1kxtb\_ d5e8ea1 d2pxya\_ d4weud\_ d1xiwc\_ d2esvd1 d1qznh\_ d1logae1  
d1f4xh1 d4n1hb\_ d3ezjb1 d3mlw1 d1kfah1 d1etza1 d1b4jh1 d3cfic\_  
d4w68a\_ d2arja1 d1ek3a\_ d2ok011 d1vera\_ d1uwgh1 d1blnb1 d1fpth1  
d1rzga1 d2giya1 d4m3kb1 d1nc2a1 d2nyyd1 d1ncna\_ d1fbih1 d5dxwa\_  
d4fqqa1 d1dqdh1 d1jfq1 d1kelh1 d1faih1 d1frgl1 d1figl1 d4m6n11  
d1fo0a\_ d4hxb1 d3b5ga\_ d3quyd1 d2h9gb1 d1i8kb\_ d2dd8h1 d2ck0h1  
d1eaja\_ d4w6wb1 d2a6ib3 d1t66d1 d2e27h\_ d1ob1b1 d1f11b1 d2v7na1  
d1ad0a1 d2xt1b1 d1pskh1 d4i13b1 d2op411 d1a0q1 d1uwell d1za3a1  
d1ncb1 d4uu9a\_ d1bm3h1 d1cloh1 d1nqba2 d1cf8h1 d4y5va\_ d1mhph1  
d5anma1 d4cdgc1 d4ldeb\_ d1y01b1 d2pcpb1 d1z3gl1 d1dfb1 d1fh5h1  
d3g5xa1 d1tzib1 d4dn311 d3zhka1 d2b1hh1 d2uyl1 d1f3dh1 d1nj9b1  
d2agjh1 d2h1p1 d1q72h1 d8fabb1 d1ndmb1 d1rjca1 d4u6hb1 d3upca\_  
d2fbj1 d1osph1 d1tvda\_ d2cjh\_ d4fhbd1 d1bd2d1 d1rz7h1 d3nn8a\_  
d1blna1 d1knoa1 d1nfda1 d2bmkb1 d1dq11\_ d1igyb1 d1igfl1 d1e8h1  
d3utzal d1nc2b1 d1rihh1 d4mwfb1 d4jvpa1 d1mieh1 d1rhfa1 d1fgn11  
d1sbs1 d1lp9e1 d1dn0a1 d4lqf1 d1iaih1 d1kgcd1 d1mh5b1 d1gpol1  
d2g60h3 d1f8t1 d2jixd1 d4grwh\_ d1fo0b\_ d1bfob1 d1axsa1 d1u9ka\_  
d1nmbh\_ d1h8na1 d1h8na2 d1jguh1 d4eura1 d3sdy1 d35c8h1 d1w7211  
d1mvub\_ d1i9rh1 d1ob1a1 d4wenb\_ d1yeeh1 d3ietc1 d1f58h1 d1ad0b1  
d1mqk1\_ d1nbvh1 d4b50a\_ d3r8bb\_ d1baf1 d1mamh1 d4rgne1 d2gsgb\_  
d35c81 d1bafh1 d1ailh1 d2pcpa1 d2fath1 d2x1pa\_ d1orsb1 d1ibgl1  
d1shma\_ d1a2yb\_ d1u0qa\_ d2coqa\_ d1hilb1 d1qfwi\_ d1jv5b\_ d1fn4b1  
d5e0qa\_ d1nsnh1 d1plgl1 d4ocx1 d1kb5h1 d1rzfh1 d1pg7x1 d2fx7h1  
d2oi9c\_ d1l7il1 d3eyva1 d1d5il1 d4ffyl\_ d1a6wh\_ d1lac6a\_ d3dvfa\_  
d1nfd1 d1mimh1 d1ri8a1 d1jhlh\_ d3dura\_ d1fskb1 d1f97a1 d3so3b1  
d2ak4d1 d1lp9f1 d4z7wf1 d1l7th1 d4y5ya\_ d4x7ec1 d1emth1 d1likf11  
d1nlbh1 d4utal1 d1bjma1 d1eapb1 d1u6ah1 d2dtgd1 d1kj2b\_ d1xeda1  
d1cleh1 d1fgvh\_ d2bnub1 d2fb4h1 d2dtgb1 d1ktrh\_ d1jpth1 d1qkz11  
d4hepg\_ d2atpb1 d1flrh1 d2hrp1 d1mvfa\_ d1iaim1 d3k80a1 d2jb5h1  
d3zkxc\_ d4grwe\_ d1it9h1 d1rhhb1 d3w9ec\_ d1e4wh1 d1sy6h1 d2j6eh1  
d3qxta\_ d1jglh1 d1p7ka1 d1tzhb1 d4n8pa1 d1gaf1 d2jelh1 d1wioa2  
d4i0cc1 d1cicb1 d1lmka2 d1lmka1 d1iqwh1 d1orqb1 d1ejoh1 d1jnlh1  
d4zga\_ d43c9b\_ d1ggbl1 d1wejh1 d3q6fa1 d1f3dj1 d3c6la1 d1bqlh1

d3p9wb\_ d1a3r1l d1h0db1 d2uzil\_ d1eo81l d1qfwl\_ d1n7ml1 d1igja1  
d1c5ch1 d2a9mh\_ d1rmfh1 d1fj1b1 d4heme\_ d1ccza1 d1a5fh1 d1ogad1  
d1dlfh\_ d1qa9b\_ d1vge1l d3qskb\_ d1sjxa\_ d4ozfg1 d1sq2n\_ d1qd0a\_  
d1kcvh1 d1c5db1 d3qcull d8faba1 d3bn9d1 d1mjuh1 d4y8dc\_ d7fabh1  
d3dvgb1 d1lo0l1 d1a6tb1 d1gigh1 d1kcrh1 d2hwz1l d1yjdc1 d3clfl1  
d4krna\_ d1d17l\_ d1e6o1l d1mexh1 d3r0ma\_ d4kkna\_ d1fns1l d1loaqh\_  
d1rzia1 d1lucbh1 d1ncw1l d4b41a\_ d1nfd1 d2mpah1 d2d7t1l d4grwf\_  
d4b5ea\_ d1l1k3h1 d3u79a\_ d4u3xa\_ d1ghf1l d1bvkb\_ d1mcww1 d1b88a\_  
d1jrhh1 d32c2b1 d4wemb\_ d1dsfh\_ d1op3h1 d1ce1l1 d1iqda1 d1qoka1  
d1qoka2 d1qfuh1 d2crya1 d1ay1h1 d1loaq1\_ d3ab0b\_ d1rur1l d1t4kb1  
d1bz7b1 d1n0xh1 d1for1l d1lucb1l d4w6yb\_ d43c9a\_ d2aabl1 d1tzia1  
d4n1ca\_ d1k6qh1 d3g9ab\_ d4tvsa1 d1ligmh\_ d1pz5b1 d3dx9a1 d3wxwh\_  
d1nakh1 d1kcul1 d3eaka\_ d4qlra1 d1cr91l d1d9ka\_ d1f4x1l d1deea1  
d2i27n2 d1c12a1 d2orb1l d1j8hd1 d1mcp1l d1c5da1 d1kenh1 d1bd2e1  
d1h5ba\_ d4x7fc1 d3upaa\_ d1t3fa1 d1indh1 d2dtgc1 d4hc1l1l d1zv5a1  
d4wgvb\_ d1uwgl1 d4f37k1 d1laqkh1 d1vesa\_ d3zkqd\_ d1fpt1l d1lo4l1  
d1knob1 d3rrqa\_ d1ct8b1 d4orz\_ d1mlbb1 d4hgkc1 d1dgd1l d1bogb1  
d4ozhe1 d1dr9a1 d1i7za1 d1dn0b1 d1kell1 d1rzib1 d1ypzf1 d1wtla\_  
d1hkfa\_ d1fail1 d1figh1 d2vyre\_ d1sjva\_ d1ohqa\_ d1bfoa1 d1pkqb1  
d1mjul1 d1b4jl1 d1nsn1l d2arjb1 d1p4bh\_ d4aj0a\_ d3nn8b\_ d2rcja1  
d1f2xk\_ d4v1dd\_ d1adqh1 d2eksa\_ d4k3ga\_ d1jfqh1 d1uweh1 d1frgh1  
d4gftb\_ d1uz8b1 d4n1ea\_ d1bm3l1 d1clo1l d3mcka1 d2vq1a1 d1ae6h1  
d4aq1b1 d1uj3b1 d1nbqa1 d1fh5l1 d2ck0l1 d2ywza\_ d1q72l1 d4nbxb\_  
d1hila1 d4hz1b1 d2j88l1 d1zmya1 d1cd0a\_ d1a4ka1 d1psk1l d1a0qh1  
d4krmb\_ d1ncbh1 d2fbjh1 d1j8he1 d1i3ua\_ d1cf8l1 d1fe8h1 d2p1ya1  
d1eeqa\_ d2x89a\_ d1o10a\_ d2r0lh1 d1ub5a1 d1dfbh1 d3eyvb1 d4jdvb1  
d4p2cg\_ d2gsia1 d2agj1l d1u3ha1 d2h1ph1 d1rih1l d1fskc1 d1boga1  
d2a77l1 d1ospl1 d1qfoa\_ d3dwta\_ d2fx7l1 d1rz7l1 d3stba1 d1pkqa1  
d1b6da1 d1dzba2 d1dzba1 d1kj2a\_ d4l1ha\_ d1rzgb1 d1dqlh\_ d12e8l1  
d1mie1l d1jmaa\_ d1sbs1l d1fgnh1 d1f58l1 d1mqkh\_ d1ndgb1 d3qeg1l  
d1iail1 d2aw2a1 d1tqbc1 d3fo2a1 d4dkaa\_ d1f8th1 d2g60l1 d2ywya\_  
d1uj3a1 d1yc7a\_ d3bd3a\_ d4w6xb1 d1nmb1\_ d1i8ka\_ d1rjlb1 d1ypze1  
d1p7kb1 d1kxqe\_ d1gpoh1 d2z4qa1 d1w72h1 d1i9rl1 d4qgya1 d4xt1c\_  
d2qqnh1 d1cica1 d3c08h1 d2cd0a\_ d2bdnh1 d1hnga1 d1mam1l d1nldh1  
d1cr9h1 d4lcih1 d3bkyh1 d3qg7l1 d1ai1l1 d1kxvc\_ d4iosd\_ d1l7ih1  
d2x1qa\_ d1ub6b1 d3k74b\_ d1libgh1 d1teth1 d1igya1 d1hxma1 d2x6ma\_  
d2e7la\_ d5e03a\_ d1qfwm\_ d2r0kh1 d1igjb1 d1rurh1 d1plgh1 d1mj8h1  
d1yuhb1 d3fmg1l d1rzf1l d1emt1l d1ad9b1 d1igtb1 d1nbl1l d1d5ih1  
d3k7ua\_ d4ffyh\_ d1bwwa\_ d3dvga1 d1a6ta1 d1fgvl\_ d4qxgl1 d1mim1l  
d1jh1l\_ d2hffb1 d2hh0l1 d1qkzh1 d1l7t1l d1afvh1 d1iaii1 d2cjuh\_  
d1um5h1 d2ghwb2 d2ghwb1 d1kgce1 d2fgwh1 d1ikfh1 d1dvfd\_ d2i24n1  
d2xtjb\_ d1za3b1 d2yc1a\_ d2hh0h1 d2x1oa\_ d1bvka\_ d1rjla1 d5e7ba1  
d1igta1 d1il1b1 d2fb4l1 d1mvua\_ d1jpt1l d32c2a1 d1fvca\_ d1iqdb1  
d2hrph1 d2p4ab\_ d4qola\_ d1p2cb1 d1wt5c\_ d1t4ka1 d5c1mb\_ d1it9l1



d1bz7a1 d1b2wh1 d1e4w11 d1jnl11 d1yedb1 d1za6b1 d3u7aa\_ d1igfh1  
d3gnml1 d1orsa1 d1wejl1 d1a2ya\_ d1hxmb1 d1gafh1 d2j4wh1 d1pz5a1  
d1j05a\_ d1a3rh1 d4fq111 d1qfwh\_ d1eo8h1 d1n7mh1 d4s11a\_ d1kegh1  
d5da4a\_ d1iqw11 d3whxb1 d1vgeh1 d1deeb1 d1c12b1 d1t2q11 d1ad9a1  
d3gsnb1 d3b2uc1 d1ggbh1 d1t3fb1 d1nak11 d4ocmc\_ d1lila1 d2v7hb3  
d2esve1 d1mcoh1 d2qr0b1 d2q3aa\_ d1ct8a1 d1kcrl1 d2pxyb\_ d2uzih\_  
d5c3ld\_ d3durb\_ d1c5cl1 d2ak4e1 d1dl7h\_ d1xiwd\_ d1mlba1 d1rmfl1  
d1i7zb1 d1dlfl\_ d2xa3a\_ d5bq7b1 d1dqqb1 d3h4211 d1legjh1 d1kcv11  
d1fe811 d2j6e11 d1f3rb2 d11k311 d1sm3h1 d1q0xh1 d1ghfh1 d7fab11  
d1igch1 d1lo0h1 d4idla\_ d5c2b1\_ d1jrh11 d1illa1 d3zhda1 d4kfzc\_  
d1b0wa\_ d1e6oh1 d1mex11 d4krpb\_ d1fnsh1 d1ncwh1 d4hgma\_ d4eigb1  
d4rzca\_ d2mpa11 d4y5xa\_ d5en2b1 d3lrga1 d4ej1c1 d1rhha1 d1j05b\_  
d1forh1 d1q9wb1 d2wzpd\_ d2aq2a1 d1h0da1 d3revb1 d2ij0c1 d1tzh11  
d4m7j11 d1k6q11 d3b9kc1 d1igml\_ d3qeu1 d1dsfl\_ d1ce1h1 d1kcuh1  
d1zvha1 d1zvoa1 d1tqbb1 d1ay111 d2qsc11 d2cgrh1 d1n10h1 d1ken11  
d3eo0a1 d4n9ob1 d1n0x11 d3k1kc\_ d2cqva1 d1fhga\_ d2k1ma\_ d2dl2a1  
d1biha3 d1biha1 d1biha4 d3qp3a1 d1g1ca\_ d1gxea\_ d1cvsc2 d1cvsc1  
d1xmwa2 d1m4ka2 d2otpa2 d1biha2 d1rhfa2 d2fcba2 d2fcba1 d1wwbx\_  
d1gsma2 d1epfa1 d1epfa2 d2dava1 d1waaa\_ d1f97a2 d1x44a1 d1vcaa2  
d1fnla2 d1fnla1 d3b5ha2 d3h8na2 d3h8na1 d1jbja1 d1jbja2 d1pd6a\_  
d1f2qa2 d1f2qa1 d3cx2a\_ d1nbqa2 d3b5ha1 d1n26a1 d1xiwb\_ d1xaua\_  
d1fltx\_ d2ifga1 d1olla1 d1olla2 d1cs6a4 d1cs6a3 d1cs6a2 d1cs6a1  
d2gw5a2 d1sy6a1 d1xiwa\_ d1lucta2 d1lucta1 d1ry7b2 d1gl4b\_ d1qz1a3  
d1olza1 d2c9aa1 d1wwca\_ d2aq2b1 d1ck1a1 d1enfa1 d1i4pa1 d1v1oa1  
d1et9a1 d1esfa1 d2g9hd1 d4ohja1 d1klud1 d1bxta1 d1eu3a1 d1ty0a1  
d1fnua1 d1c4qa\_ d1prtcl d2wv6d\_ d1prtfl\_ d1ltrd\_ d4l63b1 d1r4pb\_  
d1prtd\_ d1tl0f\_ d2bosa\_ d1prtb1 d3chbd\_

**Family-87 (d.2.1.2)**

**Positive dataset contains 3 protein sequences.**

d2gv0a\_ d2z2fa\_ d1j8xa\_

**Negative dataset contains 4097 protein sequences.**

d1m32a\_ d1libja\_ d1c7na\_ d1iuga\_ d4q75a\_ d2bkwa1 d1t3ia\_ d1n8pa\_  
d1qz9a\_ d1jf9a\_ d1leg5a\_ d1p3wa\_ d3kgwa\_ d1cl1a\_ d2ctza1 d1vjoa\_  
d2rfva\_ d1gc0a\_ d1cs1a\_ d1d2fa\_ d2chl1a1 d1qgna\_ d1pffa\_ d1u08a\_  
d1lc5a\_ d2ay1a\_ d1bw0a\_ d3pd6a\_ d7aata\_ d2csta\_ d1j32a\_ d1fg7a\_  
d4wlha\_ d1o4sa\_ d1v2da\_ d1gdea\_ d1m6sa\_ d1v72a1 d1svva\_ d1ajsa\_  
d1wsta1 d2f8ja2 d11k9a\_ d1vp4a1 d1xi9a1 d2gb3a1 d1yaaa\_ d2bnma2  
d1js3a\_ d3rcha\_ d3k40a\_ d1xkta1 d2hfka\_ d1jmkc\_ d5d3ka\_ d2cfba1  
d1dfoa\_ d1o69a\_ d1bj4a\_ d3k28a\_ d2bwpa\_ d3lg0a\_ d2fnua\_ d3ou5a\_  
d1z7da1 d1b9ha\_ d1iaya\_ d4msoa\_ d1bs0a\_ d1s0aa\_ d1sffa\_ d3tqxa\_  
d1mdoa\_ d3qboa\_ d3pgya\_ d1bjna\_ d2dkja\_ d1ejia\_ d1vefa1 d4wxga\_  
d3bs8a\_ d3gbxa1 d1w23a\_ d1m8pa3 d1qnia1 d1fwa1 d2wo3b\_ d1shxa\_  
d1f56a\_ d1bypa\_ d1azca\_ d1ws8a\_ d3u25a\_ d1cuoa\_ d1lid2a\_ d1rkra\_  
d2iaac\_ d4dp1x\_ d1nwp\_ d2gima\_ d2i7sa\_ d1qhqa\_ d1gyca3 d1hfua2

d1kbva1 d1kbva2 d1sdda1 d1sdda2 d1gyca1 d1gyca2 d1mzya1 d2bw4a1  
d1aoza1 d1aoza3 d1aoza2 d1kyaa2 d1kyaa3 d1kyaa1 d1mzya2 d4e9sa1  
d1sddb1 d1sddb2 d1hfua1 d1hfua3 d1oe1a2 d1oe1a1 d1v10a2 d1v10a3  
d1v10a1 d1novc\_ d2bbvc\_ d2b5ea2 d2b5ea3 d2b5ea1 d2b5ea4 d2kp1a1  
d2kp2a1 d1hyua3 d1hyua4 d1j08a1 g1gk9.1 g1or0.1 g1e3a.1 d1a3qa1  
d1iknc\_ d3brda1 d1p7h11 d1oy3c\_ d1imhc1 d1zk9a1 d2cxka1 d2bema\_  
d1pama1 d1ea9c1 d1qhoa1 d2fhfa2 d2fhfa1 d1k3ia1 d1j0ha1 d1cxl1a1  
d2bhua1 d1edqa1 d1f1sa2 d1ut9a2 d1gvia1 d1txka1 d1zx5a1 d1qwra\_  
d1jgta2 d1ea0a3 d1ecfa2 d1q15a2 d1ct9a2 d1ao0a2 d1te5a\_ d1ep0a\_  
d2pa7a1 d1wlta1 d2c0za1 d1ktja\_ d1ds6b\_ d1fstb\_ d1ex0a1 d1g0da1  
d4w9ta\_ d4x2ra1 d1ka9f\_ d1qo2a\_ d4axka1 d1thfd\_ d1h5ya\_ d4u28a\_  
d2y88a\_ d4wd0a\_ d1vzwa1 d1tafa\_ d1bh9b\_ d1tafb\_ d1jfib\_ d1q9ca\_  
d1h3ob\_ d2byka1 d1n1ja\_ d4g92b\_ d1bh9a\_ d1jfia\_ d2bykb1 d1n1jb\_  
d2bjca1 d2hsga1 d1qpza1 d1efaa1 d1ebfa2 d1r0ka3 d1j5pa3 d1vkoa2  
d1vm6a2 d3qvsa2 d1gr0a2 d1p1ja2 d2ovga\_ d1sq8a\_ d1rzsa\_ d3kz3a\_  
d3orca\_ d3gpdg2 d2q49a2 d1hdgo2 d2g17a2 d2cvoa2 d2czca1 d3pwka2  
d1obfo2 d1i32a2 d1zyao2 d2pkqo2 d1b7go2 d2hjsa2 d1vkna2 d1nvm2  
d2trcp\_ d4lt9a1 d3tc7a1 d3hoja\_ d1i4na\_ d3vnda\_ d3n18a1 d1geqa\_  
d3naval d4a2ra1 d3tc6a1 d1ujpa\_ d4ijba\_ d1xcfa\_ d1vc4a\_ d1rd5a\_  
d1qopa\_ d3b5va\_ d2msya\_ d2djoa1 d2r5za\_ d1au7a1 d1f43a\_ d21mda1  
d1akhb\_ d1s7ea1 d3nara\_ d1zq3p1 d2craa1 d1mija\_ d4uuta\_ d3a01a\_  
d1x58a1 d3rkqa1 d3cmya1 d2cqxa1 d2da6a1 d1e3oc1 d1fjla\_ d1mh3a1  
d1ig7a\_ d1x41a1 d1wh7a1 d1gt0c1 d2mw8a\_ d1lfup\_ d1x2ma1 d1b72a\_  
d1wi3a1 d1wjha1 d1x2na1 d1mnmc\_ d2cuea1 d3k2aa\_ d2hosa\_ d2jwta2  
d1pufa\_ d1octic1 d2hi3a\_ d1b8ia\_ d4j19a\_ d3lnqa\_ d1wh5a1 d1b8ib\_  
d6paxa2 d1k78a1 d1k78a2 d1hlva1 d1hlva2 d1iufa2 d2iu5a1 d1zk8a1  
d2g7sa1 d2fd5a1 d2np5a1 d1z0xa1 d2id6a1 d2d6ya1 d2i10a1 d1vi0a1  
d2oi8a1 d3c07a1 d2ns7a1 d2fq4a1 d2yvea1 d1t33a1 d2o7ta1 d1rkta1  
d2np3b1 d2g7ga1 d2gena1 d2fbqa1 d2g7la1 d2gfna1 d2g3ba1 d2jj7a1  
d2hyja1 d1sgma1 d1ui5a1 d2hkua1 d2id3a1 d4jyka1 d3lv8a\_ d1s3ga1  
d1zaka1 d1s4qa\_ d3tvta2 d1uf9a\_ d1khta\_ d1ckea\_ d1losna\_ d1p5zb\_  
d4tmka\_ d3cm0a\_ d1tmka\_ d1jaga\_ d3h86a\_ d1t0hb\_ d1nn5a\_ d2h92a\_  
d3kb2a1 d2c95a1 d1yj5a2 d1kgda\_ d1ly1a\_ d2ak3a1 d1vyva2 d1deka\_  
d2grja1 d1p3ja1 d1y63a\_ d1e4ya1 d1s96a\_ d3iija1 d1lvga\_ d1vyua2  
d4e22a\_ d1qf9a\_ d1jjva\_ d1q3ta\_ d1ki9a\_ d1lw7a2 d1teva\_ d1kjwa2  
d1gsia\_ d2iyva2 d1viaa\_ d1e6ca\_ d1g3ma\_ d1j99a\_ d1t8ta1 d1nsta\_  
d1fmja\_ d1zrha\_ d1ls6a\_ d2a3ra\_ d1aqua\_ d2zptx\_ d3ckla\_ d1texa\_  
d1q44a\_ d2gwha\_ d1z0ja1 d3umra2 d3gj0a1 d2gaoa1 d1yzga1 d1x3sa1  
d1g7sa4 d1puja\_ d1udxa2 d1kk1a3 d2o52a\_ d1jwyb\_ d1zcaa2 d1zcba2  
d2fv8a1 d2cjwa\_ d3dz8a1 d1xzpa2 d1vg8a\_ d4qxaa\_ d2ew1a1 d1x1ra1  
d2bcgy\_ d3doea1 d3cona\_ d3rega\_ d3wyga\_ d1upta\_ d2b6ha1 d1zd9a1  
d1lnza2 d1r5ba3 d1n0ua2 d1r2qa\_ d2f91a1 d2rhda\_ d3q3jb\_ d3q85a\_  
d1efma1 d1r8qa\_ d2gf9a1 d2akab1 d1ek0a\_ d1z08a1 d2gcoa1 d2dy1a2  
d4g01b\_ d2cxxa1 d1svia\_ d3q72a\_ d1ni3a1 d4ac9a4 d2erxa1 d2bmea\_

d1wxqa1 d2gf0a1 d41dja1 d1zunb3 d1d5ca\_ d41v5b\_ d1efca3 d1kmqa\_  
d2g6ba1 d3lrpa\_ d1tada2 d2y8ea\_ d4rd4a1 d1z06a1 d2heia\_ d3a58b\_  
d1u01a2 d1d2ea3 d1zj6a1 d2ocba\_ d3rwoa\_ d1mr3f\_ d2e9sa1 d4u5xa1  
d2iwra\_ d2fn4a1 d3bwdd\_ d2nzja1 d2atva1 d2ksqa\_ d3143a\_ d1mkya2  
d1mkya1 d1wmsa\_ d1jnya3 d2rmka\_ d1f6ba\_ d1f60a3 d1gota2 d1jala1  
d2fh5b1 d1g16a\_ d2wblc\_ d1m7ba\_ d1wf3a1 d1f5na2 d1t9ha2 d1z6xa1  
d1z0aa1 d2fg5a1 d2a5ja1 d2bcjq2 d1s0ua3 d1ky3a\_ d4y0va\_ d4lhwa\_  
d2qmea1 d2atxa1 d1egaa1 d1ryha\_ d1moza\_ d1nrjb\_ d2erya1 d3bfka\_  
d1puia\_ d1fzqa\_ d3j3az1 d3t5ga\_ d1shza2 d3defa\_ d2f7sa1 d3raba\_  
d3tsoa\_ d3aq4a\_ d2a17a1 d3sfva1 d3bc1a\_ d2ncda\_ d1sdma\_ d3h4sa1  
d2heha\_ d2grya\_ g3kin.1 d1kk8a2 d1br2a2 d1goja\_ d1f9va\_ d2mysa2  
d1lkxa\_ d3t0qa\_ d4db1a1 d3gbja\_ d1ry6a\_ d1v8ka\_ d1k8ka2 d1k8ka1  
d3uleb1 d3i33a2 d3i33a1 d1bupa1 d1dkgd2 d1dkgd1 d4ci6a2 d1jcfal  
d4a2ba2 d2fxua1 d1yaga2 d4cbua2 d1bupa2 d3vrda1 d3vrda2 d1fcdc2  
d1h1oa2 d1h1oa1 d1m70a2 d1m70a1 d1ig8a1 d1czan2 d1czan3 d1czan1  
d1ig8a2 d1czan4 d1bg3a4 d1bg3a2 d1bg3a1 d3h3no1 d3h3no2 d3ezwa2  
d1hroa\_ d4gedb\_ d3zooa\_ d1mz4a\_ d1gu2a\_ d1f1fa\_ d1dvva\_ d1c6ra\_  
d1c75a\_ d1e29a\_ d1gdva\_ d1cnoa\_ d1co6a\_ d2bh4x\_ d2aiua\_ d5cytr\_  
d1jdl\_ d1i8oa\_ d2zboa\_ d3dmia\_ d1ls9a\_ d1wvec\_ d2yk3a\_ d3ph2b\_  
d1dw0a\_ d5aura\_ d1ql3a\_ d1qn2a\_ d1f1ca\_ d4zzva\_ d2xspa\_ d1eg1a\_  
d4v20a\_ d1ojja\_ d4ipma1 d1gpia\_ d4csia\_ d3pfza\_ d3ovwa\_ d2yoka\_  
d2nqya\_ d1h4ga\_ d1hixa\_ d1oa2a\_ d1olra\_ d3b7ma\_ d4h7ma1 d3wp3a\_  
d2vgda\_ d1ligoa\_ d3zsea\_ d2nlra\_ d3wx5a\_ d1oa3a\_ d1pvxa\_ d1m4wa\_  
d1f5ja\_ d1oa4a\_ d1ks5a\_ d4ixla1 d3sita1 d1evsa\_ d1cnt1\_ d1pvhb\_  
d1z7ca\_ d1huwa\_ d1bgea\_ d1rhga\_ d1f6fa\_ d1f45b\_ d1i1rb\_ d1axia\_  
d1etea\_ d3tgxb\_ d1scfa\_ d2z3qa1 d3qb1a\_ d1hula\_ d1m48a\_ d4nkqb\_  
d1eera\_ d5e4ea\_ d2o27a\_ d3b5ka\_ d2psma1 d4zf7a\_ d3uf5a\_ d4x51a\_  
d1d9ca\_ d4ypgc1 d3oq3a\_ d1lqsl\_ d1aula\_ d1wu3i\_ d3bes1\_ d3ux9a\_  
d2ejca\_ d3muea1 d1ihoa\_ d3q12a1 d4dnxa2 d1m8pa2 d1v47a2 d1g8fa2  
d1x6va2 d3rbaa\_ d2qtra\_ d1nupa\_ d3192a\_ d1f9aa\_ d1qjca\_ d2h29a\_  
d1vlha\_ d1od6a\_ d1lw7a1 d1mrza2 d4ruka\_ d3wdpp1 d3wq5a\_ d4gxp\_  
d4hz8a\_ d1e4mm\_ d3aiua\_ d1wcga1 d1qvba\_ d3ahxa\_ d1v02a\_ d2dgaa\_  
d1pbg\_ d1vffa1 d1qoxa\_ d4ha4a\_ d2el7a\_ d1iq0a2 d1irxa2 d1r6ta2  
d1ivsa4 d2cyba\_ d1rqga2 d1j09a2 d2yxna\_ d1f7ua2 d1h3fa1 d1ffya3  
d2g36a1 d1nzja\_ d1n3la\_ d1i6la\_ d1pfva2 d1h3na3 d3n9ia\_ d3sz3a1  
d3sw2a\_ d1moxc\_ d1dx5i3 d1edmb\_ d1autl2 d1autl1 d1dval1 d1szba2  
d1kigl\_ d2y5fl\_ d1ijqa2 d1gk5a\_ d1g1sa2 d1nt0a3 d1xdtr\_ d1lmja2  
d1lmja1 d1nzia2 d2wphe\_ d1klil\_ d1pfxl2 d1pfxl1 d1p9ja\_ d1g1ta2  
d1f7ea\_ d4yzub\_ d2mgpa1 d1b9wa1 d1b9wa2 d2mgpa2 d1obl2 d1n1ia2  
d1n1ia1 d2npra2 d2npra1 d1qx2a\_ d1lig5a\_ d2y5ia\_ d1qlsa\_ d1psra\_  
d3n22a\_ d2egda\_ d4ggfc\_ d2wcea\_ d2luca\_ d4aqia\_ d3nsia\_ d2lp3a\_  
d1j55a\_ d1a4pa\_ d1nsha\_ d1exra\_ d1tiza1 d1nyaa\_ d1g8ia\_ d1ggwa\_  
d1wdcc\_ d3fwba\_ d1ggza\_ d2o5ga\_ d1ctaa\_ d3i5gc\_ d1sl8a\_ d1fpwa\_  
d2scpa\_ d2roaa\_ d4aqra\_ d3pn7b\_ d1br1b\_ d2mysb\_ d1s6ca\_ d1bjfa\_

d2obha\_ d1jfka\_ d1jf0a\_ d1qv0a\_ d1lkja\_ d2mlfc\_ d2m97a\_ d2d8na\_  
d4by5a\_ d1jbaa\_ d4nqga\_ d1wdcb\_ d2mysc\_ d1j7qa\_ d1s6ia\_ d1uhka2  
d1r2ua\_ d1dtla\_ d3kf9a\_ d3pn7c\_ d1qjta\_ d1fi6a\_ d1c07a\_ d1sfsa\_  
d1jfxa\_ d1wkya2 d1luuqa\_ d3wh9a\_ d4mlra\_ d1xyza\_ d4xuya\_ d2je8a5  
d4bf7a1 d3cuia\_ d1ur4a\_ d1qw9a2 d1odza\_ d2vzsa5 d1bqca\_ d2x2ya1  
d1hjqa\_ d1qnra\_ d4y7ea1 d1vjza\_ d4k68a\_ d2v3ga\_ d4hpga\_ d1nofa2  
d1nq6a\_ d1h4pa\_ d1aq0a\_ d3ziza\_ d4bs0a\_ d1ecea\_ d1h1na\_ d1ta3b\_  
d1w91a2 d1ilwa\_ d1uhva2 d1us3a2 d1legza\_ d7a3ha\_ d1tvna1 d3nyda1  
d1ghsa\_ d2cyga1 d4xv0a\_ d2c8na2 d1w32a\_ d3emca\_ d1v6ya1 d1foba\_  
d2uwfa1 d2fgla\_ d3niya1 d2c0ha1 d1rh9a1 d1yq2a5 d1szna2 d1fa2a\_  
d1pama4 d5do8a1 d1ea9c3 d2fhfa5 d1qhoa4 d1avaa2 d1m53a2 d4m8ua1  
d2gjpa2 d1lwha2 d4howa1 d1ktba2 d1j0ha3 d3vm5a1 d2x1ia\_ d1wzaa2  
d1uasa2 d2diea1 d1mxga2 d1ht6a2 d1eswa\_ d1iv8a2 d5cpsa\_ d1ud2a2  
d1zjaa1 d3gbea1 d1kwga2 d1wdpa\_ d1gcya2 d1g5aa2 d1hvxa2 d3dhp2  
d2bhua3 d4do4a1 d3qgva1 d1e43a2 d1g94a2 d2d3na2 d1gjwa2 d1gvia3  
d1x1na1 d1r7aa2 d1tz7a1 d2x42a1 d1tr9a1 d3abza1 d4toqa\_ d1wb0a1  
d1w9pa1 d1eoka\_ d1itxa1 d1kfw1 d1goia2 d2gsja\_ d1hjxa1 d1jnda1  
d1vf8a1 d1etob\_ d1lumqa\_ d1h6ta1 d1h6ua1 d3syxa1 d2p8va\_ d1xoda1  
d1i7aa\_ d1evha\_ d1qc6a\_ d1legxa\_ d2y8ga\_ d1xkea1 d2y8fa\_ d1b9ra\_  
d1offa\_ d1frra\_ d3wcqa\_ d1l5pa\_ d1wria\_ d1i7ha\_ d3av8a\_ d1czpa\_  
d1rfka\_ d3p1ma1 d3b2ga\_ d2bt6a2 d1wgqa1 d1v89a1 d2coda1 d1zc3b\_  
d1wg7a1 d1u5ea1 d1v61a1 d2coca1 d2ys1a1 d1v5pa1 d1ntya2 d1wjma1  
d1wila1 d1u29a\_ d1xx0a1 d1unqa\_ d2zkmx3 d1fhoa\_ d1v88a1 d2adza1  
d1x1fa1 d1p6sa\_ d2coaa1 d1btka\_ d1v5ma1 d2x18a\_ d1dyna\_ d1x1ga1  
d4kaxb\_ d2j59m1 d1ki1b2 d1xcga2 d1txda2 d1u5da1 d1dbha2 d1wlha\_  
d1upqa\_ d1v5ua1 d1foea2 d2fj1a1 d1eaza\_ d2dfka2 d2cofa1 d1kz7a2  
d9ldta1 d2ewda3 d1up7a1 d2dfda1 d1s6ya1 d1vjta1 d7mdha1 d1hyea1  
d1t2da1 d1oj3a3 d1b8pa1 d1ldna1 d1hyha1 d1civa1 d2a92a1 d1ez4a1  
d1i0za1 d1y6ja1 d1gv0a1 d1ur5a1 d1llda1 d1obba1 d1v8ba1 d1gdha1  
d1l7da1 d2dlda1 d1ygya1 d1qp8a1 d1li4a1 d1j4aa1 d2naca1 d1npya1  
d3t4ea2 d1a4ia1 d1o0sa1 d2hk9a2 d2egga2 d1b26a1 d1bvua1 d1gg2a1  
d1clda1 d1leha1 d1gtma1 d1euza1 d3dona2 d1edza1 d1gpja2 d1vi2a1  
d1p77a1 d1nyta1 d1b0aa1 d1v16a1 d1v91a1 d1txga2 d3f47a1 d1mv8a2  
d2pv7a2 d1xc2a3 d2ahra2 d4xiya1 d2f1ka2 d1pgja2 d1i36a2 d1np3a2  
d1lj8a4 d1teaa3 d1qmga2 d2i76a2 d2g5ca2 d1wdka3 d1dlja2 d3cuma3  
d1kola2 d1f8fa2 d1qora2 d1jqba2 d1vj0a2 d1cdoa2 d1gu7a2 d1d1ta2  
d1xa0a2 d2dm6a2 d1jvba2 d1rjwa2 d1llua2 d1h2ba2 d1tt7a2 d1piwa2  
d1o89a2 d1liz0a2 d1e3ja2 d1yb5a2 d1uufa2 d1vj1a2 d1e3ia2 d3gpdg1  
d1vc2a1 d2nvwa1 d1u8fo1 d1ydwa1 d1hdgo1 d2g17a1 d1cf2o1 d2czca2  
d1r0ka2 d1obfo1 d2cvoa1 d1ebfa1 d1h6da1 d1i32a1 d1zh8a1 d2q49a1  
d1qkia1 d1j5pa4 d3pzra1 d1xeaa1 d1vkoa1 d1vm6a3 d3qvsa1 d2pkqo1  
d1b7go1 d1gr0a1 d1p1ja1 d1lc0a1 d1j0xo1 d3pwka1 d2hjsa1 d1zyao1  
d1vkna1 d1tlta1 d1nvm1 d3sjua\_ d3ojfa1 d1xu9a1 d2jjya1 d1n7ha\_  
d1ylpa1 d1h5qa\_ d1jtva\_ d4fs3a\_ d2bkaa1 d1gy8a\_ d2c5aa1 d1ulsa\_

d1ooea\_ d2b69a1 d1y5ma1 d1spxa\_ d1ae1a\_ d1bxka\_ d1ydea1 d1gega\_  
d1hdoa\_ d1o5ia\_ d1e6ua\_ d1snya1 d2rhca\_ d3zv4a\_ d5ceja\_ d2d1ya1  
d3w8ea\_ d2fmua1 d1x1ta\_ d1rpna\_ d3ay7a1 d1k2wa\_ d1eq2a\_ d2hrba1  
d3ruaa\_ d2ew8a1 d4hwka\_ d1xgka\_ d2bd0a1 d1yo6a1 d2a35a1 d2ntva\_  
d1vl8a\_ d1hdca\_ d4bkua\_ d2ag5a1 d2q45a\_ d1nffa\_ d4iy1a\_ d1zbqa1  
d1kewa\_ d1ek6a\_ d1ja9a\_ d2q46a2 d1iy8a\_ d1cyda\_ d2ptga\_ d1hxha\_  
d1uzma1 d3lyla\_ d4m89a\_ d3wyea\_ d2b11a1 d1w6ua\_ d1sb8a\_ d2q2va\_  
d4nr0a\_ d1e6wa\_ d2gasa\_ d3oiga1 d2bgka1 d1mxha\_ d1vl0a1 d1rkxa\_  
d1r6da\_ d1wmaa1 d1e7wa\_ d2c07a1 d1xkqa\_ d3tzha\_ d1g0oa\_ d3lz6a\_  
d1qyca\_ d1edoa\_ d1gz6a\_ d1oc2a\_ d1t2aa\_ d1zema1 d2xoxa\_ d1z45a2  
d1geea\_ d1p33a\_ d31t0a\_ d4e6pa\_ d2wyua\_ d1db3a\_ d4q9na\_ d1xhla\_  
d4o1ma\_ d1fmca\_ d2uvda\_ d2gdza1 d1uaya\_ d2z1ma\_ d2o23a2 d2fr1a2  
d2fr1a1 d1qsga\_ d1qyda\_ d4zjua\_ d2a4ka1 d1yb1a\_ d1wvga1 d1yxma1  
d3f4ba\_ d1mg5a\_ d1xg5a1 d1t77a2 d4ekfa\_ d2ckga\_ d1th0a\_ d2bkra\_  
d1t3ca\_ d2a97a\_ d3f1ea\_ g1e1h.1 d3ioqa\_ d1fh0a\_ d1o0ea\_ d1khqa\_  
d1m6da\_ d2cb5a\_ d1cs8a\_ g8pch.1 d1s4va\_ d2pnsa\_ d1vsna1 d1mira\_  
d1iwda\_ d2oula\_ d3bwka\_ d3bcna\_ d2p86a\_ d1pvja\_ d1pcia\_ d1gece\_  
d1deua\_ d4bs6a\_ d1xkga1 d1cqda\_ d1jqpa2 d2c0ya\_ d2bdza\_ d3p5ua\_  
d2o36a\_ d1k9xa\_ d1zoya1 d1qo8a2 d1d4ca2 d1jnra2 d1kf6a2 d2jk6a2  
d2jk6a1 d1feca1 d1feca2 d1lpfa1 d1lpfa2 d1xhca1 d1xhca2 d1dx1a2  
d1dx1a1 d1m6ia2 d1onfa1 d1onfa2 d3lada2 d3lada1 d1w4xa1 d1w4xa2  
d1gesa2 d1mo9a1 d1xdia1 d1f12a2 d1f12a1 d1fcda1 d1fcda2 d1h6va2  
d1h6va1 d1mo9a2 d1gv4a2 d1gv4a1 d2gv8a2 d2gv8a1 d1aoga1 d1aoga2  
d1hyua1 d1ebda1 d1ebda2 d3dk9a1 d1q1ra2 d1q1ra1 d1gesa1 d1w5qa\_  
d2c1ha\_ d1ohla\_ d1l6sa\_ d1zbfa1 d2z1ha\_ d2etja1 d3qioa1 d1j11a\_  
d2e4la\_ d1j12a\_ d2l1sna1 d1lio2a\_ d1uaxa\_ d2yv0x\_ d1mu2a1 d1lekea\_  
d1i39a\_ d1o94a2 d1lqta1 d1cjca1 d1reoa1 d1ju2a1 d2f5va1 d3c96a1  
d2gmha1 d1pj5a2 d1gpea1 d1o5wa1 d1n4wa1 d1k0ia1 d2dw4a2 d2ivda1  
d1seza1 d2voua1 d1kdga1 d1s5ja1 d2hbja2 d2igia\_ d1wlja\_ d1qhta1  
d4dlea1 d1tgoa1 d2f96a1 d3tr8a1 d3mxma\_ d1q8ia1 d1y97a1 d1w0ha\_  
d1kfsa1 d2py5a1 d1noya\_ d1d5aa1 d1yt3a3 d2guia\_ d3mwpal d4kb1a\_  
d1nu0a\_ d2d5ra1 g1apy.1 d3ljqa\_ g1k2x.1 d1iuka\_ d2csua1 d3q9ub\_  
d2yv1a1 d3q9na\_ d2d59a\_ d1oi7a1 d2yv2a1 d1euca1 d1y81a1 d3nvva1  
d1krha3 d2h88b1 d1t3qa2 d1kf6b2 d1zoyb1 d1jq4a\_ d1ffva2 d1dgja2  
d1rm6c2 d1r7ha\_ d1faaa\_ d1wika1 d1xfla\_ d1ttza1 d2f51a1 d1ti3a\_  
d1nhoa\_ d1sena\_ d2i4aa\_ d1ep7a\_ d1zmaa1 d3lefa1 d3diea1 d2yana1  
d1z6na1 d1oaza\_ d3zywa1 d4aj8a\_ d1nm3a1 d4fiwa\_ d1wmja\_ d4hs1a1  
d1iloa\_ d1xwaa1 d1wjka1 d2vm1a\_ d1fb6a\_ d1gh2a\_ d1h75a\_ d1nw2a\_  
d1kx5b\_ d3a6na\_ d4m6ba2 d2nqbd\_ d3wkjd\_ d2yfwe\_ d4h9na\_ d5bnxa\_  
d1kx5c\_ d3r45a\_ d1eqzb\_ d4jjnb\_ d1f66c\_ d1eqza\_ d4wnnb\_ d1kx5a\_  
d1u35c1 d1lid3a\_ d2nqbc\_ d1kx5d\_ d3us3a3 d3us3a1 d1um8a\_ d1ixza\_  
d1qvra2 d1qvra3 d1qzma\_ d1sxjc2 d1jr3d2 d2p65a\_ d1l8qa2 d3hu3a3  
d1sxjd2 d1njfa\_ d1in4a2 d1sxja2 d1tuea1 d2ce7a2 d1w5sa2 d1sxjb2  
d1d2na\_ d1ny5a2 d1ofha\_ d2gnoa2 d2a5yb3 d1fnna2 d1u0ja1 d1lv7a\_

d1iqpa2 d2fnaa2 d1ixsb2 d4gita\_ d1sxje2 d1g41a\_ d1pd212 d2a2ra2  
d1k0dd2 d1f2ea2 d1gsua2 d1f3ba2 d2fhea2 d2pvqa1 d1tw9a2 dloyja2  
d1e6ba2 d1k0ma2 d3ik7a1 d4is0a1 d1r5aa2 d1j1va2 d1m0ua2 d3gtub2  
d1z9ha2 d1okta2 d1axda2 d2gsra2 d1tu7a2 d1k3ya2 d1zgm1 d1b48a2  
d1gnwa2 d1gwca2 d2gsta2 d1glqa2 d1oe8a2 d1pn9a2 d1v2aa2 d1fw1a2  
d1duga2 d2m9wa1 d3dfxa\_ d1iyka2 d1iyka1 d1rxta1 d1iica2 d2za0a\_  
d2c21a1 d2pjsa1 d1k1la\_ d2i7ra1 d1ecea\_ d1xqaa1 d5cj3a1 d1npba\_  
d1jifa\_ d2p7oa\_ d1nkia\_ d1mpya2 d1kw3b2 d1kw3b1 d4ghga1 d1tfza1  
d3isqa1 d3isqa2 d1sqia1 d1sqia2 d1lkda2 d1lkda1 d1mpya1 d1cjxa1  
d1sp9b2 d1t47a1 d1t47a2 d1f1ua2 d1sp8a1 d1sp8a2 d1f1ua1 d4iuaa3  
d4bvva\_ d5hpga\_ d3k65a\_ d1ki0a3 d1ki0a2 d1ki0a1 d1a0ha1 d1pmla\_  
d3sp8a3 d2feba1 d1qsta\_ d2beia1 d4m3sa\_ d1u6ma1 d1ygha\_ d1yk3a1  
d3dr6a\_ d1xmta\_ d1z4ea1 d2ge3a1 d1bo4a\_ d2fiaa1 d2jdca1 d1y9wa1  
d3to7a\_ d1wwza1 d2f14a1 d2ozua1 d2b5ga\_ d2cy2a1 d2p0wa\_ d1cm0a\_  
d4pswa\_ d1yrea1 d1yr0a1 d1m4ia\_ d2gana1 d1yvka1 d1ghea\_ d2g3aa1  
d1y7ra1 d2euia1 d1q2ya\_ d2fsra1 d1xeba\_ d2ae6a1 d1cjwa\_ d1qsma\_  
d2aj6a1 d1y9ka1 d1i12a\_ d1vkca\_ d2atra1 d1n71a\_ d2d4pa1 d2fiwa1  
d2fe7a1 d1tiqa1 d2ou2a\_ d1yx0a1 d2fcka1 d1p0ha\_ d2j8ma\_ d2pq8a\_  
d1z4ra1 d1s3za1 d1ufha\_ d2hqya1 d2hqya2 d1lrza2 d1lrza3 d1ne9a2  
d1xvqa1 d1pn0a2 d3hy2a\_ d2cvba1 d1o8xa\_ d1lu4a\_ d1we0a1 d2bmx1  
d2a4va1 d1psqa\_ d1xiya1 d1q98a\_ d1n8ja\_ d1zofa1 d2ggta\_ d3tjja\_  
d4jela1 d3s9fa\_ d2zcta\_ d1qmva\_ d1jfua\_ d2b1ka\_ d5dvba1 d2b5xa1  
d2v2ga\_ d1st9a\_ d3tb2a\_ d4llra\_ d4fh8a1 d1e2ya\_ d1knga\_ d2h30a\_  
d1i5ga\_ d2z9sa\_ d2f8aa1 d1tp9a1 d2b7ka\_ d1nm3a2 d3hvva\_ d2wfca1  
d4kcea\_ d1xvwa1 d4gqca1 d3qpma\_ d4k1fa\_ d1zzoa1 d1gpla\_ d1prxa\_  
d1rmka\_ d1ixta\_ d1eyoa\_ d1cnna\_ d1glpa\_ d1f3ka\_ d1fyga\_ d3kasa1  
d3bila3 d4mh8a\_ d1mu2a2 d4i7ga1 d1etha2 d1w52x1 d2ppla1 d1hpla2  
d1lpbb2 d2oxea1 d1bu8a2 d1rpla2 d1ogpa1 d1ra6a\_ d1muka\_ d3gsza\_  
d1khva\_ d1te9a\_ d2xwha\_ d3uqsa\_ d3hkwa\_ d3n6ma\_ d2cjqa\_ d2xyma\_  
d1teba\_ d1te8a\_ d1s48a\_ d1u09a1 d4wfxa\_ d3tyqa\_ d2pgga1 d1gyta2  
d4l3wa\_ d1llfa\_ d1gz7a\_ d1lukca\_ d1cr6a2 d3groa\_ d1pjaa\_ d1ei9a\_  
d1svpa\_ d1mbma\_ d3su6a1 d1cula1 d4agka\_ d1q31a\_ g1n11.1 d3e90b\_  
d1ep5a\_ d3u1jb\_ d3zxha\_ d1cgla\_ d1leaka2 d1hy7a\_ d2jsda\_ d1cxva\_  
d1hv5a\_ d1i76a\_ d3p0ya1 d1lgra1 d1lgra2 d1n8yc1 d1m6ba2 d1m6ba1  
d4dv8a2 d1j7na1 d1sr9a2 d1rqba2 d2tbvc\_ d1c8nc\_ d1x36a\_ d1smvc\_  
d1ng0c\_ d4sbvc\_ d1lopa\_ d1f2nc\_ d1cixa\_ d1y29a\_ d1v7fa\_ d2jtba\_  
d1d1ha\_ d1g9pa\_ d1lupa\_ d1qk7a\_ d1mb6a\_ d2a2va\_ d1niya\_ d1i25a\_  
d1hvwa\_ d2mpqa\_ d1ie6a\_ d1kqha\_ d1la4a\_ d2mxoa1 d1koza\_ d1qk6a\_  
d1emxa\_ d1lqra\_ d1c6wa\_ d1js9c\_ d1f15b\_ d1za7a\_ d1rypd\_ d1irua\_  
d1rypc\_ d3unfk\_ d1rypa\_ d1j2pa\_ d1irui\_ d1j2qh\_ d3unfh\_ d1m4ya\_  
d1rypb\_ d1irul\_ d1irug\_ d1liru2\_ d1q5rh\_ d1rypg\_ d1g3ka\_ d1iruf\_  
d1q5qa\_ d1e94a\_ d1lirub\_ d1ryph\_ d3ty6a\_ d1liruj\_ d1liruk\_ d1rype\_  
d1lirud\_ d1lirue\_ d3mi01\_ d1rypf\_ d1liruh\_ d2z3ba\_ d1liruc\_ d3mka2\_  
d1liru1\_ d1ny721 d1ny722 d1a6ca3 d1a6ca2 d1a6ca1 d1pgl22 d1pgl21

d1pgl11 d1ny711 d1mqta\_ d1d4m3\_ d1fmd3\_ d2mev1\_ glaym.1 d1ev13\_  
d4q4w1\_ d1r1a3\_ d2x5ia\_ d1rhi1\_ glr1a.1 gl1d4m.1 glrhi.1 d1b35b\_  
d1loopa\_ d1tme1\_ d4iv1a\_ g1pvc.1 glfpn.1 d1fpn1\_ d4gb31\_ d1d4m1\_  
d1fmd1\_ d1ev11\_ d2wzr3\_ g1cov.1 d1qqp3\_ g1fmd.1 d2x5ic\_ d1rhi3\_  
gloop.1 d1hxs1\_ g1hxs.1 d1fpn3\_ d1bev1\_ g2mev.1 d1eah3\_ d1aym1\_  
d1pvc3\_ d1qqp1\_ d1zba3\_ d1h8ta\_ d3vbhc\_ g1b35.1 g1bev.1 d1hxs3\_  
g1ev1.1 d1bev3\_ g1tmf.1 d1tmf1\_ d2mev3\_ g1eah.1 g1h8t.1 d1eah1\_  
d4q4w3\_ d1r1a1\_ d1aym3\_ d1pvc1\_ d1zba1\_ d1h8tc\_ d1loopc\_ d1tme3\_  
g1qqp.1 d4iv1c\_ g1tme.1 d1y14b1 d2nn6i1 d1i94l\_ d2zjra2 d1smxa\_  
d2qamc2 d1hh2p1 d2r7da1 d1r12a2 d1wfaq1 d3bzka4 d1x6oa2 d3a0ja\_  
d2j01d2 d2ja9a1 d4q15a\_ d1hr0w\_ d1luza\_ d2n3sa\_ d2vnud1 d1h95a\_  
d1go3e1 d2nn6h1 d1ne3a\_ d2mola\_ d1iz6a2 d1jjga\_ d1e3pa2 d2ix0a3  
d2ix0a2 d2lxja\_ d1ueba3 d1ueba2 d2z0sa1 d1u0la1 d2ix0a1 d2eifa2  
d2je6i1 d3i2za1 d2c35b1 d2ahob2 d1t9ha1 d3i4oa\_ d2qall1 d1jt8a\_  
d2nn6g1 d1g6pa\_ d3cama\_ d1i94q\_ d1c9oa\_ d1d7qa\_ d2ba0a1 d2vnud2  
d2vnud3 d1khia2 d2qalq1 d1wi5a1 d1xtda2 d1ny4a\_ d1eixa\_ d3exra\_  
d2ffca1 d2fdsa1 d3n3ma1 d2czda\_ d2yyua\_ d1vqta1 d1dbta\_ d3ldva1  
d1lux8a\_ d1dlya\_ d4i0va\_ d2bkma\_ d1dlwa\_ d2bmma\_ d2r80b\_ d1cqxa1  
d1cg5a\_ d1gcvb\_ d3boma\_ d2h8fb\_ d2raoa\_ d3bj1a\_ d4hrrb\_ d2r50a\_  
d3d1kb\_ d2aa1b1 d3zhwa\_ d3hf4b\_ d3gdja\_ d1jebb\_ d3bj1b\_ d1x9fb\_  
d1wmub\_ d1gcva\_ d3bcqb\_ d3d4xb\_ d1gvha1 d2dc3a\_ d3hf4a\_ d4yu3a\_  
d3k8ba\_ d1qpwb\_ d2r80a\_ d3bcqa\_ d1v4wa\_ d3wtgb\_ d1jl7a\_ d4esaa\_  
d3d1ab\_ d1fsla\_ d4h2la\_ d1v4wb\_ d1mwca\_ d1vhba\_ d1jeba\_ d1spgb\_  
d1h97a\_ d1q1fa\_ d1tu9a1 d3d1aa\_ d1hdsb\_ d3hyub\_ d2zfb\_ d3fs4a\_  
d1oj6a\_ d1shrb\_ d4h2lb\_ d4yu3b\_ d1spga\_ d3hrwa\_ d3qqra\_ d3at5a\_  
d4wchd\_ d3hyua\_ d1cg5b\_ d1uc3a\_ d1hbra\_ d2raob\_ d1outb\_ d4esab\_  
d3gdjb\_ d3qqqa\_ d1x9fc\_ d3vrfa\_ d1litha\_ d3mkba\_ d3d4xa\_ d3mjpa\_  
d1jl6a\_ d3fh9a\_ d1outa\_ d2dc3b\_ d1lit2a\_ d3eoka\_ d3g46a\_ d1qpwa\_  
d3vrfb\_ d1ch4a\_ d1x9fd\_ d1hdsa\_ d2zfb\_ d3mkbb\_ d1or4a\_ d3wtga\_  
d1a4fa\_ d3fh9b\_ d3bomb\_ d3cy5a\_ d3at5b\_ d1x9fa\_ d2oifa\_ d4lmb\_  
d1cpcb\_ d3v57a\_ d1kn1a\_ d1cpca\_ d4f0ta\_ d2vjha\_ d4po5b\_ d1eyxa\_  
d1alla\_ d4f0tb\_ d1b33b\_ d1b8db\_ d4h0mb\_ d1b33a\_ d2vjhb\_ d4lm6b\_  
d2vmlb\_ d1a1lb\_ d2vjta\_ d3dbja\_ d2vmla\_ d2vjtb\_ d4f0ub\_ d1f99b\_  
d4rmpa1 d1liaa\_ d1eyxb\_ d2uulb\_ d4lmsb\_ d4f0ua\_ d2bv8a\_ d1f99a\_  
d2bv8b\_ d2c7lb\_ d3dbjb\_ d4rmpb1 d1b8da\_ d4h0ma\_ d3v57b\_ d1kn1b\_  
d1liab\_ d2uula\_ d2j96a\_ d1azwa\_ d1mtza\_ d2xqfa\_ d1ea5a\_ d1f6wa\_  
d1dx4a\_ d1qe3a\_ d1k4ya\_ d4qwwa\_ d2ha2a\_ d1r88a\_ d1sfra\_ d1f0na\_  
d4qeka\_ d3c8da2 d2pbla1 d1jkma\_ d1jjia\_ d1lzla\_ d1jjfa\_ d1gl9b1  
d1gkub1 d2qvba\_ d2v9za\_ d4kafa1 d2m5ta\_ d1wqsa\_ d5bpea\_ d2ipha\_  
d1lvoa\_ d2bhga1 d3tnta\_ d3sjia\_ d3d23a1 d2fyqa\_ d3tloa\_ d3zvea1  
d2hrva\_ d3q3ya1 d4asha1 d1s5ja2 d1qhta2 d4dlea2 d1tgoa2 d3py8a2  
d1q8ia2 d1kfsa2 d2py5a2 d1d5aa2 d1f74a\_ d3l21a\_ d2e1da\_ d1to3a1  
d1w3ia\_ d1sfla\_ d1n7ka\_ d1vcva1 d4imea\_ d1wa3a\_ d2ocza1 d1f2ja\_  
d3m16a\_ d2yxga\_ d1ub3a\_ d3a5fa\_ d1fbaa\_ d1l6wa\_ d1xfba1 d1wx0a1

d1vpxa1 d1ojxa\_ d1mxsa\_ d2a4aa1 d1xkya1 d3cq0a1 d3s1xa\_ d1f05a\_  
d1fdja\_ d3cpra1 d4d2ja\_ d1e88a1 d1l6ja5 d1l6ja4 d1eaka4 d1eaka3  
d1l6ja3 d1h8pa2 d3rp2a\_ g1lucy.1 d1fuja\_ d2zchp\_ d3w94a\_ d1si5h\_  
d1l06a\_ g2pka.1 d1cgha\_ d1kigh\_ d1a5ia\_ d3s9ba\_ d1hj8a\_ d1ao5a\_  
d2anya\_ d1q3xa1 d1gvza\_ d1azza\_ d4gsoa\_ d2f91a1 d1liau\_ d1gdna\_  
d1eufa\_ g1fiw.1 d1eq9a\_ d4nfea\_ d2rdla\_ d1spja\_ d1elva1 d1a7sa\_  
d1ekbb\_ d1pfxc\_ d1yc0a\_ d2aiqa\_ g1fiz.1 d1fi8a\_ d4k60a\_ d4dgja\_  
d1mzaa\_ d1op0a\_ d3tjva\_ d1pytd\_ d1sgfg\_ g1gg6.1 d2eeka\_ g1rtf.1  
d1a0ja\_ d3g01a\_ d1pytc\_ d4e7na\_ d1ddja\_ d1z8ga1 d2hlca\_ d1npma\_  
g1jou.1 d1sgfa\_ d1autc\_ g2hnt.1 g1kdq.1 d1orfa\_ d3s69a\_ d4crga\_  
d1fxya\_ d1bqya\_ d2ftba\_ d1pmpa\_ d2rcqa1 d1fdqa\_ d4lkpa\_ d1sa8a\_  
d1vyfa\_ d1lpja\_ d3vg7a1 d4azqa1 d1o8va\_ d5bvqa\_ d1p6pa\_ d2qo4a\_  
d1opba\_ d1yiva1 d1o1va\_ d4bvma1 d4tkba\_ d4i3ba\_ d1bwya\_ d1ftpa\_  
d1ggla\_ d4gkca\_ d1cbia\_ d3p6da1 d1kqwa\_ d2a0aa1 d1m4la\_ d2bk7a\_  
d3fjua\_ d1z5ra1 d1kwma1 d1uwya2 d1jqga1 d2c1ca1 d1dtda\_ d3lgia\_  
d3i77a\_ d2z9ia2 d4nsva\_ d1lcya2 d4jcna\_ d1os8a\_ d1hpga\_ d1p3ca\_  
d1l1ja\_ d1qtfa\_ d1e69a\_ d1mv5a\_ d3g60a4 g1ii8.1 d1ji0a\_ d1qhla\_  
d1v43a3 d2wmfa1 d1vpla\_ d1g2912 d4a82a2 g1f2t.1 d2d62a1 d3tuic1  
d2bbsa1 d3g60a3 d2ixea\_ d1g6ha\_ d1sgwa1 d2qi9c\_ d3rlfa1 d3b60a1  
d3d31a2 d2pzea1 g1xew.1 d1jj7a\_ d1oxxk2 d2onka1 d1wlwa\_ d1iwea\_  
d1qf5a\_ d1vmaa2 d1nija1 d1np6a\_ d2p67a1 d3ihla\_ d1okkd2 d1ls1a2  
d1s1ma2 d1iona\_ d2v40a\_ d3hida\_ d2vo1a1 d2g0ta1 d1vcoa2 d1j8mf2  
d1g3qa\_ d1xjca\_ d1p9ba\_ d1qzxa3 d1ihua2 d1ihua1 d2qm8a\_ d1dj2a\_  
d4ioja\_ d1cp2a\_ d1yrba2 d1hyqa\_ d3gqba2 d1skye3 d1xp8a1 d1tf7a2  
d1tf7a1 d1ye8a1 d1skyb3 d2qe7d2 d4blta\_ d4huta\_ d3l1daa2 d4hyya\_  
d2i3ba1 d1cr1a\_ d3j9tb2 d3ntua2 d1vdza1 d2z43a\_ d1e9ra\_ d1nlfa\_  
d3ziaa2 d1n0wa\_ d1g6oa\_ d3ziad2 d3j9ta2 d1pzna2 d3gqbb2 d2i49a\_  
d1nnfa\_ d1xvxa\_ d1lursa\_ d1h3da1 d1iuda\_ d4m1va1 d1twya\_ d3e13x\_  
d2nxoa1 d4pfua\_ d3ttma\_ d1elja\_ d2qmwa1 d1us5a\_ d1y3na1 d1jeta\_  
d1uqwa\_ d4f19a1 d2esna2 d3thia\_ d3fasa1 d2uyeb\_ d2xwva1 d1r9la\_  
d2fyia1 d1pb7a\_ d2ozza1 d1sw5a\_ d1nh8a1 d1vr5a1 d2g29a\_ d1xs5a\_  
d3lswa\_ d2z23a\_ d3w9va\_ d3tcha\_ d1q35a\_ d1z7me1 d3q27a\_ d1p99a\_  
d1ve4a1 d2i6ea1 d4mcoa1 d4n8ya\_ d1eu8a\_ d1zbma1 d1hsla\_ d1ixca2  
d1j1na\_ d1xvya\_ d1y9ua\_ d2z22a1 d1xoca1 d4oera\_ d1wdna\_ d5f1qa1  
d1xt8a1 d1i6aa\_ d4gwoa\_ d4igta1 d1pc3a\_ d4mmpa1 d1o63a\_ d2czla1  
d2onsa2 d4mija1 d1eh3a\_ d3skpa\_ d1dtza1 d1ieja\_ d1jnfa2 d1ce2a1  
d1jnfa1 d1b1xa2 d1b1xa1 d1jw1a1 d1jw1a2 d1ryoa\_ d1h76a1 d1h76a2  
d1c4oa1 d2p6ra3 d2p6ra4 d1oywa2 d1oywa3 d1wrba1 d1w36b2 d1w36b1  
d1c4oa2 d3bora\_ d1t6na\_ d2eyqa5 d2eyqa3 d2eyqa2 d2zu6a2 d1veca\_  
d1uaaa1 d1w36d1 d2g9na1 d1z3ix2 d2rb4a\_ d1hv8a1 d1hv8a2 d1t5ia\_  
d1w36c2 d2j0sa2 d2j0sa1 d1fuka\_ d3hjha1 d1z5za1 d1qdea\_ d1z63a1  
d1s2ma2 d1s2ma1 d1wp9a1 d1wp9a2 d1gm5a3 d1gm5a4 d3dina4 d3dina3  
d1q0ua\_ d1w36c1 d1z3ix1 d1nkta3 d1uaaa2 d1w36d2 g1qhh.1 d2fwra2  
d2fwra1 d3q3ma\_ d1za0a1 d1mxra\_ d2inca\_ d1jk0a\_ d2incb\_ d1mhyb\_



d3hflb\_ dlmtyb\_ d1r2fa\_ d2uw1a\_ d1mhyd\_ d3n37a\_ d1afra\_ d1oquc\_  
d1syya\_ dlmtyd\_ d2o1za\_ dluzra\_ d1smsa\_ d2fkza\_ d1zujal d1s3qa1  
d2fjca1 d1z6om1 d1veia\_ d4dyya\_ d1jiga\_ d3gvya\_ d2pyba\_ d4cy9a1  
d3bvfa1 d1r03a\_ d2cf7a\_ d1nf4a\_ d1zs3a1 d4iwka\_ d3ka8a\_ d3np0x\_  
d11b3a\_ d4e6ka\_ d1z6oa1 d2fzfa1 d4dyua\_ d3ge4a\_ d1jgca\_ d4am4a\_  
d2z6ma\_ d1ji5a\_ d1vlga\_ d11koa1 d1krqa\_ d3qz3a\_ d1o9ra\_ d2ffxj\_  
d1euma\_ d1yv1a1 d2v2pa\_ d1j30a\_ d4di0a\_ d1dpsa\_ d1oewa\_ d2qzxa\_  
d2asia\_ d1psoe\_ d1miqa\_ d1smra\_ d2h6ta\_ d1pfza\_ d1lizda\_ d3hd8a\_  
d1j71a\_ d1dpja\_ d4aa9a\_ d1t6ex\_ g1b5f.1 g11ya.1 g1htr.1 d1qdma2  
d1bxoa\_ d1wkra\_ d1tzsa\_ d1libqa\_ d2qzwa\_ d1ex4a2 d2v76a\_ d1wj1a1  
d1aqca\_ d1qgga2 d1qgga1 d1ntva\_ d1n3ha\_ d4dbba\_ d3f0wa1 d1wgua1  
d2cy4a1 d3hqca\_ d1wvha1 d1xr0b1 d1bdqa\_ d3ggta\_ d3ixoa\_ d1mrx\_a\_  
d2haha\_ d1tw7a\_ d4njsa\_ d1sgua\_ d2p3da\_ d1nsoa\_ d3d3ta\_ d2rkfa\_  
d1c6ya\_ d2rspa\_ d3ogpa\_ d3ekwa\_ d2o4na\_ d2j9ja\_ d1baia\_ d3ggua\_  
d31zua\_ d4npua\_ d4j55a\_ d2r8na\_ d2fxda\_ d2p3ca\_ d4dqa\_ d3ttpa\_  
d3t3ca\_ d2p3aa\_ d2hc0a\_ d2fdda\_ d3mwsa\_ d1k8rb\_ d1wgra1 d1ef5a\_  
d1wfyal d1e8ya3 d1wgyal d11fda\_ d2cs4a1 d1wxma1 d2byeal d3kh0a1  
d2byfal d1wxaa1 d1e7ua3 d1wgda1 d1wggal d4q5eb\_ d1wjna1 d1se9a\_  
d3n3kb\_ d1wz0a1 d1we6a1 d2m0xa\_ d2gbka\_ d3rt3b1 d1wh3a1 d1sifa\_  
d2ekec2 d4ii2b1 d4hk2a1 d1c3ta\_ d1m94a\_ d1wgha1 d1ttna1 d1j8ca\_  
d1wx8a1 d3v6cb1 d2ma9b\_ d4i61b1 d1bt0a\_ d2jvca1 d2k1fa\_ d1wxva1  
d1wf9a1 d1t0ya\_ d2io0b2 d1x1ma1 d2gbma\_ d1zw7a1 d2m17a\_ d1ud7a\_  
d1we7a1 d2lwp\_a\_ d2gbja\_ d1wjua1 d1v6ea1 d1v86a1 d4eewa\_ d1wiaa1  
d4icva\_ d4gu2a\_ d1wx7a1 d1wy8a1 d4hjka1 d2faza1 d1v5oa1 d2a13a1  
d2cr5a1 d1wj4a1 d1s3sg\_ d3ubra\_ d1qo8a1 d1d4ca1 d2k3va\_ d1ft5a\_  
d1qdba\_ d1m1qa\_ d2j7aa\_ d1h21a\_ d4fasa\_ d1jnia\_ d1oaha\_ d1sp3a\_  
d1g66a\_ d1qoza\_ d5ajha1 d4lu0a\_ d1of8a\_ d3unda1 d3e9aa1 d1vr6a2  
d1n8fa\_ d2qkfa\_ d1d9ea\_ d1o60a\_ d2h0ba\_ d2erfa\_ d1h30a1 d3mw4a1  
d1pz7a\_ d2r1ba\_ d3v64a1 d1d2sa\_ d3bopa1 d3mw3a1 d1okqa1 d1okqa2  
d1wioa4 d1ccza2 d1vcaa1 d1dr9a2 d1ic1a1 d2d9qb1 d2nxyb2 d2dara2  
d2dara1 d1wyha2 d2dloa2 d1rutx4 d1rutx3 d2cuqa2 d1x41a2 d1x41a1  
d1x3ha2 d1x3ha1 d2d8za1 d1x61a2 d1x6aa1 d1x6aa2 d2cora2 d2cora1  
d1v6ga1 d1v6ga2 d2d8za2 d1x64a1 d1x64a2 d1b8ta1 d2co8a1 d1x63a2  
d2dj7a2 d2dj7a1 d2cu8a2 d2cu8a1 d1g47a2 d1g47a1 d1wyha1 d2dloa1  
d1wiga1 d1wiga2 d2cupa2 d2cupa3 d1x68a1 d2d8ya2 d2d8ya1 d1m3va2  
d1x62a1 d1x68a2 d1x61a1 d1b8ta3 d1b8ta2 d2d8xa2 d2d8xa1 d1x4ka1  
d1x4ka2 d2cuqa1 d1m3va1 d2co8a2 d1j2oa2 d1x63a1 d2cura1 d2cura2  
d1x62a2 d2e3fa\_ d1mm0a\_ d2e3ea\_ d21lda\_ d2ny8x\_ d2e3ga\_ d2ny9x\_  
d2nz3a\_ d3ia2a\_ d4dgqa1 d1hkha\_ d1zoia\_ d2k4ua\_ d1hp2a\_ d2lu9a\_  
d1baha\_ d2meoa1 d1wm7a\_ d1hlya\_ d1n8ma\_ d1j1za\_ d1wpda\_ d1c55a\_  
d1pvza\_ d1wt7a\_ d1rjia\_ d1wz5a\_ d1m2sa\_ d1pjva\_ d1qkya\_ d2ktca1  
d1wmta\_ d1du9a\_ d1j5ja\_ d1r1ga\_ d1t0za\_ d2i61a\_ d1t1ta\_ d1sn4a\_  
d1kv0a\_ d21kba\_ d1npia\_ d1wwna\_ d1pe4a\_ d2kbka\_ d2li7a\_ d1djta\_  
d2kbha\_ d1dq7a\_ d1sega\_ d1omya\_ d1zywa1 d1jzaa\_ d2jca\_ d1dy2a\_

dlixra2 dliyjb4 dliyjb5 dliyjb3 dlo7ia\_ d4ipca1 d1x3ea\_ d4apva\_  
d1jb7a1 d1jb7a2 d1jb7a3 d3kdfa\_ dluelb\_ dlwjja1 d3eiva\_ dlxjva2  
dlxjva1 d2ccza2 d1se8a\_ d111oc\_ d1jb7b\_ d1qvca\_ d3ulla\_ d1qzga\_  
d1miua4 d1miua5 d3g48a1 d1gd7a\_ d1mkha\_ d1jjcb3 d1pyba\_ d3ubub\_  
d1legia\_ d1qo3c\_ d1v7pa\_ d1tdqb\_ d3ubua\_ d1c3ab\_ d1h8ua\_ d3bx4b\_  
d1t8ca1 d1sb2a1 d1qdda\_ d2ziba1 d3cada\_ d1byfa\_ d1j34b\_ d1jwia\_  
d1jzna\_ d1c3aa\_ d1oz7b\_ d1wmza\_ d3bdwb\_ d1hq8a\_ d1fifa1 d1dv8a\_  
d3hupa\_ d1wk1a1 d1umra\_ d2afpa\_ d3bx4a\_ d1gz2a\_ d1sl6a\_ d1v7pb\_  
d3g8ka\_ d1ixxa\_ d1j34a\_ d1jwib\_ d1g1sa1 d1y17a1 d1ja3a\_ d1fvub\_  
d3bdwa\_ d1sb2b1 d1fvua\_ d1umrc\_ d1oz7a\_ d4m17a\_ d3cfwa1 d1ypqa1  
d1g1ta1 d3fd4a\_ d3l9jc\_ d4dn8a1 d1v41b\_ d1rdl1\_ d2msba\_ d1dzka\_  
d4tlja\_ d2a2ua\_ d4wfva\_ d3t1da\_ d4iaxa\_ d3zq3a\_ d2nnda\_ d1i4ua\_  
d1bbpa\_ d1kt7a\_ d1exsa\_ d3s26a1 d1lf7a\_ d1qfta\_ d4gh7a\_ d1z24a1  
d1qabe\_ d1xkia\_ d1ew3a\_ d3bx7a\_ d4iawa1 d1n0sa\_ d1gkab\_ d3kzaa\_  
d2k23a\_ d2l9ca1 d2joza1 d1gm6a\_ d3kffa\_ d3saoa1 d1e5pa\_ d1yupa1  
d1iiua\_ d1f00i3 d1rpma\_ d2shpa1 d1yfoa\_ d1l8ka\_ d2ooqa1 d1g4us2  
d1p15a\_ d1lara1 d1wcha\_ d2fh7a2 d2fh7a1 d1ohea1 d1ohea2 d2f4da\_  
d1rxda\_ d2hxpa\_ d1xria\_ d1d5ra2 d1fpza\_ d3ezza\_ d4y2ea\_ d1i9sa\_  
d3azya\_ d3wvja\_ d1upsa1 d1ajoa\_ d2hyka\_ d2vy0a\_ d1o4ya\_ d3o5sa\_  
d3d6ea\_ d3atga\_ d1dypa\_ d1umza\_ d3i4ia\_ d1c1la\_ d41bqa\_ d1a78a\_  
d1slta\_ d4no4a\_ d3zsja\_ d3duia\_ d1g86a\_ d1is3a\_ d1hlca\_ d1tdha3  
d1q3ba3 d1k82a3 g1qmo.1 g1len.1 d3zyra\_ d1fnya\_ d1n47a\_ g2ltn.1  
d1avba\_ d3usua\_ d1dhkb\_ d1f9ka\_ d1ukga\_ d1g8wa\_ d1g9fa\_ d1wbfa\_  
d3wcsa\_ d1g7ya\_ g1loe.1 d1mvqa\_ d1hq1a\_ d1dbna\_ d1qnwa\_ d1fx5a\_  
d4l8qa\_ d1ioaa\_ d3n35a\_ d1epwa1 d3h33a\_ d1rwja\_ d19hca\_ d1os6a\_  
d3bxua\_ d3h4na\_ d3caoa\_ d1j0pa\_ d2ctha\_ d1duwa\_ d1ofwa\_ d2e84a\_  
d1hh5a\_ d1gyoa\_ d3h34a\_ d1dszb\_ d1a6ya\_ d3cbba\_ d1ynwa1 d1r4ia\_  
d1hcqa\_ d2hana\_ d2hanb\_ d2enva1 d1kb4b\_ d2n11b\_ d1l01a\_ d1cita\_  
d1adqa1 d1fnga1 d1uvqb1 d1zs8a1 d2vola1 d2vola2 d1mfb12 d2jelh2  
d1uwe12 d3qq4b1 d1kjob\_ d1k5na1 d1osph2 d4odh12 d1ow0a1 d1ow0a2  
d1bfob2 d3l9ra2 d3jttth1 d2fath2 d4elkb2 d1fn4b2 d2xfxb\_ d1pg7x2  
d1cqka\_ d4k71b2 d1l2a1 d1eapb2 d4lfhg2 d1i4fa1 d2nw2a2 d1kfah2  
d1mhca1 d1h3ua1 d1wejh2 d1h0db2 d1a5fh2 d1kcvh2 d1mjuh2 d1qqda1  
d1kcrh2 d1k8ia1 d3huja2 d2nnab1 d1nfd2 d3mffb2 d1s9va1 d1l3h2  
d1q0x12 d1fv1b1 d1neza1 d4rfeb2 d1r3ha1 d1a6tb2 d1kjva1 d1pz5b2  
d1onqa1 d2bc4a2 d1de4a1 d1k8da1 d1tcra2 d1dn0b2 d1nfd2 d2xwtb2  
d1bfoa2 d1mexh2 d1iakb1 d1ypzf2 d4f7ea2 d1q7212 d2fbjh2 d1fe8h2  
d1clzh2 d1fngb1 d1uvqa1 d1vgka1 d1c16a1 d4j12a2 d4x99b2 d1igtb3  
d1je6a1 d1q72h2 d1nldh2 d1teth2 d2hmic2 d1ilca2 d1ilca1 d1k8ib1  
d1q0yh2 d1kfa12 d3frua1 d1pg7w2 d1u58a1 d1igyb4 d1igyb3 d1hyrc1  
d1klub1 d1deeb2 d1c12b2 d2bc4b2 d2ig2h2 d1kcv12 d3wn5b1 d1l2b\_  
d1l312 d1mjul2 d1sm3h2 d1q0xh2 d1zvsal d1ydpal d1u8ib2 d1ypze2  
d1kcu2 d1op9a\_ d1y01a1 d1etzb1 d1legj11 d2gsib1 d1nj9a1 d4jfh1  
d1aqk11 d1t2ja\_ d1l04h1 d1zvya1 d3v4v11 d4enec1 d1kxtb\_ d5e8ea1

d2pxya\_ d4weud\_ dlxiwc\_ d2esvd1 dlqznh\_ dlogae1 dl44xh1 d4nlhb\_  
d3ezjb1 d3mlwl1 dlkfah1 dletza1 dlb4jh1 d3cfic\_ d4w68a\_ d2arja1  
dl1ek3a\_ d2ok0l1 dlvera\_ dluwgh1 dlblnb1 dlfpth1 dlrzga1 d2giya1  
d4m3kb1 dlnc2a1 d2nyyd1 dlncna\_ dlfbih1 d5dxwa\_ d4fqqa1 dl1dqdh1  
dl1jfq11 dlkelh1 dl1faih1 dl1frgl1 dl1fig11 d4m6n11 dl1fo0a\_ d4hxb11  
d3b5ga\_ d3quyd1 d2h9gb1 dl1i8kb\_ d2dd8h1 d2ck0h1 dl1eaja\_ d4w6wb1  
d2a6ib3 dl1t66d1 d2e27h\_ dl1ob1b1 dl1f11b1 d2v7na1 dl1ad0a1 d2xt1b1  
dl1pskh1 d4i13b1 d2op4l1 dl1a0ql1 dl1uwell1 dl1za3a1 dl1ncbl1 d4uu9a\_  
dl1bm3h1 dl1cloh1 dl1nqba2 dl1cf8h1 d4y5va\_ dl1mhph1 d5anma1 d4cdgc1  
d4ldeb\_ dl1y0lb1 d2pcpb1 dl1z3gl1 dl1dfb11 dl1fh5h1 d3g5xa1 dl1tzib1  
d4dn3l1 d3zhka1 d2b1hh1 d2uyla1 dl1f3dh1 dl1nj9b1 d2agjh1 d2h1pl1  
dl1q72h1 d8fabbl dl1ndmb1 dl1rjca1 d4u6hb1 d3upca\_ d2fbj11 dl1osph1  
dl1tvda\_ d2cjh\_ d4fhbd1 dl1bd2d1 dl1rz7h1 d3nn8a\_ dl1blna1 dl1knoa1  
dl1nfdal d2bmkb1 dl1dq11\_ dl1igyb1 dl1igf11 dl12e8h1 d3utza1 dl1nc2b1  
dl1rihh1 d4mwfbl d4jvpa1 dl1mieh1 dl1rhfa1 dl1fgn11 dl1sbsh1 dl1lp9e1  
dl1dn0a1 d4lqf11 dl1iaih1 dl1kgcd1 dl1mh5b1 dl1gpol1 d2g60h3 dl1f8t11  
d2jixd1 d4grwh\_ dl1fo0b\_ dl1bfob1 dl1axsa1 dl1u9ka\_ dl1nmbh\_ dl1h8na1  
dl1h8na2 dl1jguh1 d4eura1 d3sdy11 d35c8h1 dl1w72l1 dl1mvub\_ dl1i9rh1  
dl1ob1a1 d4wenb\_ dl1yeeh1 d3ietc1 dl1f58h1 dl1ad0b1 dl1mqk1\_ dl1nbvh1  
d4b50a\_ d3r8bb\_ dl1baf11 dl1mamh1 d4rgne1 d2gsgb\_ d35c8l1 dl1bafh1  
dl1ailh1 d2pcpa1 d2fath1 d2x1pa\_ dl1orsb1 dl1ibgl1 dl1shma\_ dl1a2yb\_  
dl1u0qa\_ d2coqa\_ dl1hilb1 dl1qfwi\_ dl1jv5b\_ dl1fn4b1 d5e0qa\_ dl1nsnh1  
dl1plgl1 d4ocxl1 dl1kb5h1 dl1rzfh1 dl1pg7x1 d2fx7h1 d2oi9c\_ dl117i11  
d3eyva1 dl1d5i11 d4ffyl\_ dl1tet11 dl1a6wh\_ dl1ac6a\_ d3dvfa\_ dl1nfdel  
dl1mimh1 dl1ri8a1 dl1jhlh\_ d3dura\_ dl1fskb1 dl1f97a1 d3so3b1 d2ak4d1  
dl1lp9f1 d4z7wf1 dl117th1 d4y5ya\_ d4x7ec1 dl1emth1 dl1ikf11 dl1nlbh1  
d4utal1 dl1bjma1 dl1eapb1 dl1u6ah1 d2dtgd1 dl1kj2b\_ dl1xeda1 dl1cleh1  
dl1fgvh\_ d2bnub1 d2fb4h1 d2dtgb1 dl1ktrh\_ dl1jpth1 dl1qkz11 d4hepg\_  
d2atpb1 dl1flrh1 d2hrpl1 dl1mvfa\_ dl1iaim1 d3k80a1 d2jb5h1 d3zkxc\_  
d4grwe\_ dl1it9h1 dl1rhhb1 d3w9ec\_ dl1e4wh1 dl1sy6h1 d2j6eh1 d3qxta\_  
dl1jglh1 dl1p7ka1 dl1tzhb1 d4n8pa1 dl1gaf11 d2jelh1 dl1wioa2 d4i0cc1  
dl1cicb1 dl1lmka2 dl1lmka1 dl1iqwh1 dl1orqb1 dl1ejoh1 dl1jnlh1 d4zgl1a\_  
d43c9b\_ dl1ggbl1 dl1wejh1 d3q6fa1 dl1f3dj1 d3c6la1 dl1bqlh1 d3p9wb\_  
dl1a3r11 dl1h0db1 d2uzil\_ dl1eo8l1 dl1qfwl\_ dl1n7ml1 dl1igja1 dl1c5ch1  
d2a9mh\_ dl1rmfh1 dl1fj1b1 d4heme\_ dl1ccza1 dl1a5fh1 dl1ogad1 dl1dlfh\_  
dl1qa9b\_ dl1vgel1 d3qskb\_ dl1sjxa\_ d4ozfg1 dl1sq2n\_ dl1qd0a\_ dl1kcvh1  
dl1c5db1 d3qcul1 d3bn9d1 dl1mjuh1 d4y8dc\_ d7fabh1 d3dvgb1 dl1lo0l1  
dl1a6tb1 dl1gigh1 dl1kcrh1 d2hwz11 dl1yjdc1 d3clfl1 d4krna\_ dl1dl7l\_  
dl1e6ol1 dl1mexh1 d3r0ma\_ d4kkna\_ dl1fns11 dl1loagh\_ dl1rzial dl1lucbh1  
dl1ncwl1 d4b41a\_ dl1nfdfl d2mpah1 d2d7t11 d4grwf\_ d4b5ea\_ dl1lk3h1  
d3u79a\_ d4u3xa\_ dl1ghfl1 dl1bvkb\_ dl1mcww1 dl1b88a\_ dl1jrhh1 d32c2b1  
d4wemb\_ dl1dsfh\_ dl1op3h1 dl1ce1l1 dl1iqda1 dl1qoka1 dl1qoka2 dl1qfuh1  
d2crya1 dl1ay1h1 dl1oaql\_ d3ab0b\_ dl1rur11 dl1t4kb1 dl1bz7b1 dl1n0xh1  
dl1for11 dl1lucbl1 d4w6yb\_ d43c9a\_ d2aabl1 dl1tzial d4n1ca\_ dl1k6qh1

d3g9ab\_ d4tvsa1 d1ligmh\_ d1pz5b1 d3dx9a1 d3wxwh\_ d1nakhl d1kcul1  
d3eaka\_ d4qlra1 d1cr9l1 d1d9ka\_ d1f4xl1 d1deea1 d2i27n2 d1c12a1  
d2orb1l d1j8hd1 d1mcph1 d1c5da1 d1kenh1 d1bd2e1 d1h5ba\_ d4x7fc1  
d3upaa\_ d1t3fa1 d1lindh1 d2dtgc1 d4hc1l1 d1zv5a1 d4wgvb\_ d1uwgl1  
d4f37k1 d1aqkh1 d1vesa\_ d3zkqd\_ d1fpt1l d1lo4l1 d1knob1 d3rrqa\_  
d1ct8b1 d4orz\_ d1mlbb1 d4hgkc1 d1dqdl1 d1bogb1 d4ozhe1 d1dr9a1  
d1i7za1 d1dn0b1 d1kell1 d1rzib1 d1ypzf1 d1wtla\_ d1hkfa\_ d1fail1  
d1figh1 d2vyre\_ d1sjva\_ d1ohqa\_ d1bfoa1 d1pkqb1 d1mjul1 d1b4jl1  
d1nsnl1 d2arjb1 d1p4bh\_ d4aj0a\_ d3nn8b\_ d2rcja1 d1f2xk\_ d4v1dd\_  
d1adqh1 d2eksa\_ d4k3ga\_ d1jfqh1 d1uweh1 d1frgh1 d4gftb\_ d1uz8b1  
d4nlea\_ d1bm3l1 d1clo1l d3mcka1 d2vq1a1 d1ae6h1 d4aq1b1 d1uj3b1  
d1nbqa1 d1fh5l1 d2ck0l1 d2ywza\_ d1q72l1 d4nxbx\_ d1hila1 d4hzlb1  
d2j88l1 d1zmya1 d1cd0a\_ d1a4ka1 d1pskl1 d1a0qh1 d4krmb\_ d1ncbh1  
d2fbjh1 d1j8he1 d1i3ua\_ d1cf8l1 d1fe8h1 d2p1ya1 d1eeqa\_ d2x89a\_  
d1o10a\_ d2r0lh1 d1ub5a1 d1dfbh1 d3eyvb1 d4jdvb1 d4p2cg\_ d2gsia1  
d2agjl1 d1u3ha1 d2h1ph1 d1rihl1 d1fskc1 d1boga1 d2a77l1 d1ospl1  
d1qfoa\_ d3dwta\_ d2fx7l1 d1rz7l1 d3stba1 d1pkqa1 d1b6da1 d1dzba2  
d1dzba1 d1kj2a\_ d4l1ha\_ d1rzgb1 d1dq1h\_ d12e8l1 d1miel1 d1jmaa\_  
d1sbs1l d1fgnh1 d1f58l1 d1mqkh\_ d1ndgb1 d3qegl1 d1iail1 d2aw2a1  
d1tqbc1 d3fo2a1 d4dkaa\_ d1f8th1 d2g60l1 d2ywy\_ d1uj3a1 d1yc7a\_  
d3bd3a\_ d4w6xb1 d1nmb1\_ d1i8ka\_ d1rjlb1 d1ypze1 d1p7kb1 d1kxqe\_  
d1gpoh1 d2z4qa1 d1w72h1 d1i9rl1 d4qgya1 d4xt1c\_ d2qqnh1 d1cical  
d3c08h1 d2cd0a\_ d2bdnh1 d1hnga1 d1maml1 d1nldh1 d1cr9h1 d4lcih1  
d3bkyh1 d3qg7l1 d1ai1l1 d1kxvc\_ d4iosd\_ d1l7ih1 d2x1qa\_ d1ub6b1  
d3k74b\_ d1libgh1 d1teth1 d1igya1 d1hxma1 d2x6ma\_ d2e7la\_ d5e03a\_  
d1qfwm\_ d2r0kh1 d1igjb1 d1rurh1 d1plgh1 d1mj8h1 d1yuhb1 d3fmg1l  
d1rzzfl1 d1emt1l d1ad9b1 d1igtb1 d1nlbl1 d1d5ih1 d3k7ua\_ d4ffyh\_  
d1bwwa\_ d3dvga1 d1a6ta1 d1fgvl\_ d4qxgl1 d1mim1l d1jhl1\_ d2hffb1  
d2hh0l1 d1qkzh1 d1l7tl1 d1afvh1 d1iaii1 d2cjuh\_ d1um5h1 d2ghwb2  
d2ghwb1 d1kgce1 d2fgwh1 d1ikfh1 d1dvfd\_ d2i24n1 d2xtjb\_ d1za3b1  
d2yc1a\_ d2hh0h1 d2x1oa\_ d1bvka\_ d1rjla1 d5e7ba1 d1igta1 d1il1b1  
d2fb4l1 d1mvua\_ d1jpt1l d3c2a1 d1fvca\_ d1iqdb1 d2hrph1 d2p4ab\_  
d4qo1a\_ d1p2cb1 d1wt5c\_ d1t4ka1 d5c1mb\_ d1it9l1 d1bz7a1 d1b2wh1  
d1e4wl1 d1jnl1l d1yedb1 d1za6b1 d3u7aa\_ d1igfh1 d3gnml1 d1orsa1  
d1wejl1 d1a2ya\_ d1hxmb1 d1gafh1 d2j4wh1 d1pz5a1 d1j05a\_ d1a3rh1  
d4fq1l1 d1qfwh\_ d1eo8h1 d1n7mh1 d4s1la\_ d1kegh1 d5da4a\_ d1iqwl1  
d3whxb1 d1vgeh1 d1deeb1 d1c12b1 d1t2ql1 d1ad9a1 d3gsnb1 d3b2uc1  
d1ggbh1 d1t3fb1 d1nakl1 d4ocmc\_ d1lila1 d2v7hb3 d2esve1 d1mcoh1  
d2qr0b1 d2q3aa\_ d1ct8a1 d1kcr1l d2pxyb\_ d2uzih\_ d5c3ld\_ d3durb\_  
d1c5c1l d2ak4e1 d1d17h\_ d1xiwd\_ d1mlba1 d1rmfl1 d1i7zb1 d1dlfl\_  
d2xa3a\_ d5bq7b1 d1dqqb1 d3h42l1 d1legjh1 d1kcv1l d1fe8l1 d2j6e1l  
d1f3rb2 d1lk3l1 d1sm3h1 d1q0xh1 d1ghfh1 d7fab1l d1igch1 d1lo0h1  
d4idla\_ d5c2b1\_ d1jrh1l d1il1a1 d3zhda1 d4kfzc\_ d1b0wa\_ d1e6oh1  
d1mex1l d4krpb\_ d1fnsh1 d1ncwh1 d4hgma\_ d4eigb1 d4rzca\_ d2mpal1

d4y5xa\_ d5en2b1 d3lrga1 d4ej1c1 d1rhha1 d1j05b\_ d1forh1 d1q9wb1  
d2wzpd\_ d2aq2a1 d1h0da1 d3revb1 d2ij0c1 d1tzha1 d4m7j11 d1k6ql1  
d3b9kc1 d1igml\_ d3qeua1 d1dsfl\_ d1ce1h1 d1kcu1 d1zvha1 d1zvoa1  
d1tqbb1 d1ay111 d2qsc11 d2cgrh1 d1n10h1 d1ken11 d3eo0a1 d4n9ob1  
d1n0x11 d3k1kc\_ d2cqva1 d2k1ma\_ d2d12a1 d1biha3 d1biha1 d1biha4  
d3qp3a1 d1g1ca\_ d1gxea\_ d1cvsc2 d1cvsc1 d1xmwa2 d1m4ka2 d2otpa2  
d1biha2 d1rhfa2 d2fcba2 d2fcba1 d1wwbx\_ d1gsma2 d1lepfa1 d1lepfa2  
d2dava1 d1waaa\_ d1f97a2 d1x44a1 d1vcaa2 d1fnla2 d1fnla1 d3b5ha2  
d3h8na2 d3h8na1 d1jbj1a1 d1jbj2a1 d1pd6a\_ d1f2qa2 d1f2qa1 d3cx2a\_  
d1nbqa2 d3b5ha1 d1n26a1 d1xiwb\_ d1xaua\_ d1fltx\_ d2ifga1 d1olla1  
d1olla2 d1cs6a4 d1cs6a3 d1cs6a2 d1cs6a1 d2gw5a2 d1sy6a1 d1xiwa\_  
d1lucta2 d1lucta1 d1ry7b2 d1gl4b\_ d1qz1a3 d1olza1 d2c9aa1 d1wwca\_  
d2aq2b1 d1ck1a1 d1lenfa1 d1i4pa1 d1v1oa1 d1et9a1 d1esfa1 d2g9hd1  
d4ohja1 d1klud1 d1eu3a1 d1ty0a1 d1fnua1 d1c4qa\_ d1prtc1 d2wv6d\_  
d1prtf\_ d1l1trd\_ d4l63b1 d1r4pb\_ d1prtd\_ d1t10f\_ d2bosa\_ d1prtb1  
d3chbd\_

**Family-88 (d.2.1.3)**

**Positive dataset contains 6 protein sequences.**

d1691a\_ d2o4wa\_ d1p37a\_ d1xjta1 d2f2qa\_ d4e97a1

**Negative dataset contains 4024 protein sequences.**

d1m32a\_ d1libja\_ d1c7na\_ d4q75a\_ d2bkwa1 d1t3ia\_ d1n8pa\_ d1qz9a\_  
d1jf9a\_ d1eg5a\_ d1p3wa\_ d3kgwa\_ d1c11a\_ d2ctza1 d1vjoa\_ d2rfva\_  
d1gc0a\_ d1cs1a\_ d1d2fa\_ d2ch1a1 d1qgna\_ d1pffa\_ d1elua\_ d1ax4a\_  
d1c7ga\_ d2v1pa1 d2ez1a\_ d4nmwa\_ d3i2ka1 d1lnsa3 d1mpxa2 d2cfba1  
d1o69a\_ d1bj4a\_ d3k28a\_ d2bwpa\_ d3lg0a\_ d2fnua\_ d3ou5a\_ d1z7da1  
d1b9ha\_ d1iaya\_ d4msoa\_ d1bs0a\_ d1s0aa\_ d1sffa\_ d3tqxa\_ d1mdoa\_  
d3qboa\_ d3pgya\_ d1bjna\_ d2dkja\_ d1ejia\_ d1vefa1 d4wxga\_ d3bs8a\_  
d3gbxa1 d1w23a\_ d1u08a\_ d1lc5a\_ d1b5pa\_ d2ay1a\_ d1bw0a\_ d3pd6a\_  
d7aata\_ d2csta\_ d1j32a\_ d1fg7a\_ d4wlha\_ d1o4sa\_ d1v2da\_ d1gdea\_  
d1m6sa\_ d1v72a1 d1svva\_ d1ajsa\_ d1wsta1 d2f8ja2 d1lk9a\_ d1vp4a1  
d1xi9a1 d2gb3a1 d1yaaa\_ d2bnma2 d1m8pa3 d1f56a\_ d1bypa\_ d1azca\_  
d1ws8a\_ d3u25a\_ d1cuoa\_ d1id2a\_ d1rkra\_ d2iaac\_ d4dp1x\_ d1nwpa\_  
d2gima\_ d2i7sa\_ d1qhqa\_ d3ehbb1 d1fftb1 d1gyca3 d1hfua2 d1kbva1  
d1kbva2 d1sdda1 d1sdda2 d1gyca1 d1mzya1 d2bw4a1 d1aoza1 d1aoza3  
d1aoza2 d1kyaa2 d1kyaa3 d1kyaa1 d1mzya2 d4e9sa1 d1sddb1 d1sddb2  
d1hfua1 d1hfua3 d1oel1a2 d1oel1a1 d1v10a2 d1v10a3 d1v10a1 d2dara2  
d2dara1 d1wyha2 d2dloa2 d1rutx4 d1rutx3 d2cuqa2 d1x41a2 d1x41a1  
d1x3ha2 d1x3ha1 d2d8za1 d1x61a2 d1x6aa1 d1x6aa2 d2cora2 d2cora1  
d1v6ga1 d1v6ga2 d2d8za2 d1x64a1 d1x64a2 d1b8ta1 d2co8a1 d1x63a2  
d2dj7a2 d2dj7a1 d2cu8a2 d2cu8a1 d1g47a2 d1g47a1 d1j2oa1 d1wyha1  
d2dloa1 d1wiga1 d1wiga2 d2cupa2 d2cupa3 d1x68a1 d2d8ya2 d2d8ya1  
d1m3va2 d1x62a1 d1x68a2 d1x61a1 d1b8ta3 d1b8ta2 d2d8xa2 d2d8xa1  
d1x4ka1 d1x4ka2 d2cuqa1 d1m3va1 d2co8a2 d1j2oa2 d1x63a1 d2cura1  
d2cura2 d1x62a2 g1gk9.1 g1cp9.1 g1e3a.1 d3sxwa1 d4luka\_ d1a3qa1

dliknc\_ d3brda1 d1p7hl1 dloy3c\_ dlimhc1 dlzk9a1 d2cxka1 d2bema\_  
d1pama1 dlea9c1 dlqhoa1 d2fhfa2 d2fhfa1 dlk3ia1 dlcxla1 d2bhua1  
dledqa1 d1f1sa2 d1ut9a2 dlgvia1 d1txka1 dlzx5a1 d2phla2 d2phla1  
d1fxza2 d1fxza1 d1lrha\_ dluija1 gldgw.1 d2v09a\_ dluika2 dluika1  
d1dgwa\_ dlep0a\_ d2pa7a1 d1wlta1 d1nxma\_ d2c0za1 dlnepa\_ d1g0da1  
d4mh8a\_ d1mu2a2 d4i7ga1 d1eixa\_ d3exra\_ d2ffca1 d2fdsa1 d3n3ma1  
d2czda\_ d1q6oa\_ d2yyua\_ d1vqta1 d1dbta\_ d3ldva1 d2bjca1 d2hsga1  
d1qpza1 d1efaa1 d1h4ba\_ d2opoa\_ d1mqta\_ d1d4m3\_ d1fmd3\_ d2mev1\_  
g1aym.1 d1ev13\_ d4q4w1\_ d1r1a3\_ d2x5ia\_ d1rhi1\_ g1r1a.1 g1d4m.1  
g1rhi.1 d1b35b\_ d1loopa\_ d1tme1\_ d4iv1a\_ g1pvc.1 g1fpn.1 d1fpn1\_  
d4gb31\_ d1d4m1\_ d1fmd1\_ d1ev11\_ d2wzr3\_ g1cov.1 d1qqp3\_ g1fmd.1  
d2x5ic\_ d1rhi3\_ g1oop.1 d1hxs1\_ g1hxs.1 d1fpn3\_ d1bev1\_ d1eah3\_  
d1aym1\_ d1pvc3\_ d1qqp1\_ d1zba3\_ d1h8ta\_ d3vbhc\_ g1b35.1 g1bev.1  
d1hxs3\_ g1ev1.1 d1bev3\_ g1tmf.1 d1tmf1\_ d1b35a\_ d2mev3\_ g1eah.1  
g1h8t.1 d1eah1\_ d4q4w3\_ d1r1a1\_ d1aym3\_ d1pvc1\_ d1zba1\_ d1h8tc\_  
d1oopc\_ d1tme3\_ g1qqp.1 d4iv1c\_ g1tme.1 d1e3oc2 d1lic8a2 d2ovga\_  
d1sq8a\_ d1rzsa\_ d3kz3a\_ d3orca\_ d3gpdg2 d2q49a2 d1hdgo2 d2g17a2  
d2cvoa2 d2czca1 d3pwka2 d1obfo2 d1i32a2 d1zyao2 d2pkqo2 d1b7go2  
d2hjsa2 d1cf2o2 d1vkna2 d1nvmb2 d1ux8a\_ d1dlya\_ d4i0va\_ d2bkma\_  
d1dlwa\_ d2bmma\_ d2msya\_ d2djoa1 d2r5za\_ d1au7a1 d1f43a\_ d21mda1  
d1akhb\_ d1s7ea1 d3nara\_ d1zq3p1 d2craa1 d1mija\_ d4uuta\_ d3a01a\_  
d1x58a1 d3rkqa1 d3cmya1 d2cqxa1 d2da6a1 d1e3oc1 d1fjla\_ d1mh3a1  
d1ig7a\_ d1x41a1 d1wh7a1 d1gt0c1 d2mw8a\_ d1x2ma1 d1b72a\_ d1wi3a1  
d1jgga\_ d1wjha1 d1x2na1 d1mnmc\_ d2cuea1 d3k2aa\_ d2hosa\_ d2jwta2  
d1pufa\_ d1octc1 d2hi3a\_ d1b8ia\_ d4j19a\_ d3lnqa\_ d1wh5a1 d1b8ib\_  
d1fexa\_ d2cqra1 d1guua\_ d1ug2a1 d2cqqa1 d2ajea1 d4a69c\_ d1h8ac1  
d2crga1 d2iw5b1 d1xc5a1 d1ofcx1 d2cu7a1 d1wgxa1 d2cjja1 d2ckxa1  
d1gvda\_ d1hcra\_ d1tc3c\_ d1gdta1 d1u78a2 d6paxa2 d1k78a1 d1k78a2  
d1b10a1 d1b10a2 d1d5ya2 d3lv8a\_ d1s3ga1 d1zaka1 d1s4qa\_ d3tvta2  
d1uf9a\_ d1khta\_ d1ckea\_ d1osna\_ d1p5zb\_ d4tmka\_ d3cm0a\_ d1tmka\_  
d1jaga\_ d3h86a\_ d1t0hb\_ d1nn5a\_ d2h92a\_ d3kb2a1 d2c95a1 d1yj5a2  
d1kgda\_ d1ly1a\_ d2ak3a1 d1vyva2 d1deka\_ d2grja1 d1p3ja1 d1y63a\_  
d1e4ya1 d1s96a\_ d3iija1 d1lvga\_ d1nksa\_ d1vyua2 d4e22a\_ d1qf9a\_  
d1jjva\_ d1q3ta\_ d1ki9a\_ d1lw7a2 d1teva\_ d1kjwa2 d1gsia\_ d1m7ga\_  
d1x6va3 d1g3ma\_ d1t8ta1 d1nsta\_ d1fmja\_ d1zrha\_ d1ls6a\_ d2a3ra\_  
d1aqua\_ d2zptx\_ d3ckla\_ d1texas\_ d1q44a\_ d2gwha\_ d1z0ja1 d3umra2  
d3gj0a1 d2gaoa1 d1yzga1 d1x3sa1 d1g7sa4 d1puja\_ d1udxa2 d1kk1a3  
d2o52a\_ d1jwyb\_ d1zcaa2 d1zcba2 d2fv8a1 d2cjwa\_ d3dz8a1 d1xzpa2  
d1vg8a\_ d4qxaa\_ d2ew1a1 d1x1ra1 d2bcgy\_ d3doea1 d3cona\_ d3rega\_  
d3wyga\_ d1upta\_ d2b6ha1 d1zd9a1 d1r5ba3 d1n0ua2 d1r2qa\_ d2f91a1  
d2rhda\_ d3q3jb\_ d3q85a\_ d1efma1 d1r8qa\_ d2gf9a1 d2akab1 d1ek0a\_  
d1z08a1 d2gcoa1 d2dyla2 d4g01b\_ d2cxa1 d1svia\_ d3q72a\_ d1ni3a1  
d4ac9a4 d2erxa1 d2bmea\_ d1wxqa1 d2gf0a1 d4ldja1 d1zunb3 d1d5ca\_  
d4lv5b\_ d1efca3 d1kmqa\_ d2g6ba1 d3lrpa\_ d1tada2 d2y8ea\_ d4rd4a1

d1z06a1 d2heia\_ d3a58b\_ d1u01a2 d1d2ea3 d1zj6a1 d2ocba\_ d3rwoa\_  
d1mr3f\_ d2e9sa1 d4u5xa1 d2iwra\_ d2fn4a1 d3bwdd\_ d2nzja1 d2atva1  
d2ksqa\_ d3l43a\_ d1mkya2 d1mkya1 d1wmsa\_ d1jnya3 d2rmka\_ d1f6ba\_  
d1f60a3 d1gota2 d1jala1 d2fh5b1 d1g16a\_ d2wblc\_ d1m7ba\_ d1wf3a1  
d1f5na2 d1t9ha2 d1z6xa1 d1z0aa1 d2fg5a1 d2a5ja1 d2bcjq2 d1s0ua3  
d1ky3a\_ d4y0va\_ d4lhwa\_ d2qmea1 d2atxa1 d1egaa1 d1ryha\_ d1moza\_  
d1nrjb\_ d2erya1 d3bfka\_ d1puia\_ d1fzqa\_ d3j3az1 d3t5ga\_ d1shza2  
d3defa\_ d2f7sa1 d3raba\_ d3tsoa\_ d3aq4a\_ d2a17a1 d3sfva1 d3bc1a\_  
d2ncda\_ d1sdma\_ d3h4sa1 d2heha\_ d2grya\_ g3kin.1 d1kk8a2 d1br2a2  
d1goja\_ d1f9va\_ d2mysa2 d3t0qa\_ d4db1a1 d3gbja\_ d1ry6a\_ d1v8ka\_  
d1s5ja2 d1qhta2 d4dlea2 d1tgoa2 d3py8a2 d1q8ia2 d1kfsa2 d2py5a2  
d1k8ka2 d1k8ka1 d3uleb1 d3i33a2 d3i33a1 d1bupa1 d1dkgd2 d1dkgd1  
d4ci6a2 d1jcfa1 d4a2ba2 d2fxua1 d1yaga2 d4cbua2 d1bupa2 d1g99a1  
d2elza2 d2elza1 d1saza1 d1saza2 d1ig8a1 d1czan2 d1czan3 d1czan1  
d1ig8a2 d1czan4 d1bg3a4 d1bg3a3 d1bg3a1 d3h3no1 d3h3no2 d3ezwa2  
d1hroa\_ d4gedb\_ d3zooa\_ d1mz4a\_ d1gu2a\_ d1f1fa\_ d1c6ra\_ d1c75a\_  
d1e29a\_ d1gdva\_ d1cnoa\_ d1h32b\_ d1co6a\_ d2bh4x\_ d2aiua\_ d5cytr\_  
d1jdla\_ d1i8oa\_ d2zboa\_ d3dmia\_ d1ls9a\_ d1wvec\_ d2yk3a\_ d3ph2b\_  
d1dw0a\_ d5aura\_ d1ql3a\_ d1qn2a\_ d1f1ca\_ d4zzva\_ d2xspa\_ d1leg1a\_  
d4v20a\_ d1ojja\_ d4ipma1 d1gpia\_ d4csia\_ d3pfza\_ d3ovwa\_ d2yoka\_  
d2nqya\_ d1h4ga\_ d1hixa\_ d1oa2a\_ d1olra\_ d3b7ma\_ d4h7ma1 d3wp3a\_  
d2vgda\_ d1ligoa\_ d3zsea\_ d2nlra\_ d3wx5a\_ d1oa3a\_ d1pvxa\_ d1f5ja\_  
d1oa4a\_ d1ks5a\_ d4ixla1 d1h32a1 d1evsa\_ d1cnt1\_ d1pvhb\_ d1z7ca\_  
d1huwa\_ d1bgea\_ d1rhga\_ d1f6fa\_ d1f45b\_ d1ilrb\_ d1axia\_ d1etea\_  
d3tgxb\_ d1scfa\_ d2z3qa1 d3qb1a\_ d1hula\_ d1m48a\_ d4nkqb\_ d1eera\_  
d1v7mv\_ d5e4ea\_ d2o27a\_ d3b5ka\_ d2psma1 d4zf7a\_ d3uf5a\_ d4x51a\_  
d1d9ca\_ d4ypgc1 d3oq3a\_ d1lqsl\_ d1n1fa\_ d1aula\_ d1wu3i\_ d3bes1\_  
d3ux9a\_ d2ejca\_ d3muea1 d1lihoa\_ d3q12a1 d4dnxa2 d1m8pa2 d1v47a2  
d1g8fa2 d1x6va2 d3wdpp1 d3wq5a\_ d1gnxa\_ d4gxpa\_ d4hz8a\_ d3aiua\_  
d1wcca1 d1qvba\_ d3ahxa\_ d1v02a\_ d2dgaa\_ d1pbga\_ d1vffa1 d1qoxa\_  
d4ha4a\_ d2el7a\_ d1iq0a2 d1irxa2 d1r6ta2 d1ivsa4 d2cyba\_ d1rqga2  
d1j09a2 d2yxna\_ d1f7ua2 d1h3fa1 d1ffya3 d2g36a1 d1nzja\_ d1jila\_  
d1n3la\_ d1i6la\_ d1pfva2 d1h3na3 d3n9ia\_ d3sz3a1 d3sw2a\_ d1moxc\_  
d1dx5i3 d1edmb\_ d1aut12 d1aut11 d1nqlb\_ d1dva11 d1szba2 d1kigl\_  
d2y5fl\_ d1ijqa2 d1gk5a\_ d1g1sa2 d1nt0a3 d1xdtr\_ d1lmja2 d1lmja1  
d1nzia2 d2wphe\_ d1klil\_ d1pfxl2 d1pfxl1 d1p9ja\_ d1g1ta2 d1f7ea\_  
d4yzub\_ d2mgpa1 d1b9wa1 d1b9wa2 d2mgpa2 d1ob1c1 d1ob1c2 d1n1ia1  
d2npra2 d2npra1 d2y5ia\_ d1qlsa\_ d1psra\_ d3n22a\_ d2egda\_ d4ggfc\_  
d2wcea\_ d2luca\_ d4aqia\_ d3nsia\_ d2lp3a\_ d1j55a\_ d1a4pa\_ d1k8ua\_  
d1nsha\_ d1pvaa\_ d3fs7a\_ d1ttxa\_ d1rwy\_ d2kyfa\_ d1rk9a\_ d1a75a\_  
d1exra\_ d1tiza1 d1nyaa\_ d1g8ia\_ d1ggwa\_ d1wdcc\_ d3fwba\_ d1ggza\_  
d2o5ga\_ d1ctaa\_ d1m45a\_ d3i5gc\_ d1sl8a\_ d1fpwa\_ d2scpa\_ d2roaa\_  
d4aqra\_ d3pn7b\_ d1br1b\_ d1s6ca\_ d1bjfa\_ d2obha\_ d1jfka\_ d1jf0a\_  
d1qv0a\_ d1lkja\_ d2mlfc\_ d2m97a\_ d2d8na\_ d4by5a\_ d1jbaa\_ d4nqga\_

d1wdcb\_ d2mysc\_ d1j7qa\_ d1s6ia\_ d1uhka2 d1r2ua\_ d1dtla\_ d3kf9a\_  
d3pn7c\_ d5d67d\_ d1tuza\_ d1h8ba\_ d1leg3a1 d1leg3a2 d2zkmx1 d1snla\_  
d1wkya2 d1uuqa\_ d3wh9a\_ d4m1ra\_ d1xyza\_ d4xuya\_ d2je8a5 d4bf7a1  
d3cuia\_ d1ur4a\_ d1qw9a2 d1odza\_ d2vzsa5 d1bqca\_ d2x2ya1 d1hjqa\_  
d1qnra\_ d4y7ea1 d1vjza\_ d4k68a\_ d2v3ga\_ d4hpga\_ d1nofa2 d1nq6a\_  
d1h4pa\_ d1aq0a\_ d3ziza\_ d4bs0a\_ d1ecea\_ d1h1na\_ d1ta3b\_ d1w91a2  
d1i1wa\_ d1us3a2 d1legza\_ d7a3ha\_ d1tvna1 d3nyda1 d1ghsa\_ d2cyga1  
d4xv0a\_ d2c8na2 d1w32a\_ d3emca\_ d1v6ya1 d1foba\_ d2uwfa1 d2fgla\_  
d3niya1 d2c0ha1 d1rh9a1 d1yq2a5 d1szna2 d1fa2a\_ d1pama4 d5do8a1  
d1ea9c3 d1hx0a2 d2fhfa5 d1qhoa4 d1avaa2 d1m53a2 d4m8ua1 d2gjpa2  
d1lwha2 d4howa1 d1ktba2 d1j0ha3 d3vm5a1 d2x1ia\_ d1wzaa2 d1uasa2  
d2diea1 d1mxga2 d1ht6a2 d1eswa\_ d1iv8a2 d5cpsa\_ d1ud2a2 d1zjaa1  
d3gbea1 d1kwga2 d1wdpa\_ d1gcya2 d1g5aa2 d1hvxa2 d3dhpa2 d2bhua3  
d4do4a1 d3qgva1 d1e43a2 d1g94a2 d2d3na2 d1gvia3 d1x1na1 d1r7aa2  
d1tz7a1 d4c7ga2 d2gjxa1 d1jaka1 d1yhta1 d4toqa\_ d1wb0a1 d1w9pa1  
d1itxa1 d1kfwa1 d1goia2 d1edqa2 d2gsja\_ d1hjxa1 d1jnda1 d1vf8a1  
d1umqa\_ d1g2ha\_ d1mixa2 d1e5wa2 d1j19a2 d1isna2 d2a16b2 d1g4ma2  
d1offa\_ d1frra\_ d3wcqa\_ d1e9ma\_ d1l15pa\_ d1wria\_ d1i7ha\_ d3av8a\_  
d1czpa\_ d1rfka\_ d3p1ma1 d3b2ga\_ d2bt6a2 d1wgqa1 d1v89a1 d2coda1  
d1zc3b\_ d1wg7a1 d1u5ea1 d1v61a1 d2coca1 d2ys1a1 d1v5pa1 d1ntya2  
d1wjma1 d1wila1 d1u29a\_ d1xx0a1 d1unqa\_ d2zkmx3 d1fhoa\_ d1v88a1  
d2adza1 d1x1fa1 d1p6sa\_ d2coaa1 d1btka\_ d1v5ma1 d1faoa\_ d2x18a\_  
d1dyna\_ d1x1ga1 d4kaxb\_ d2j59m1 d1ki1b2 d1xcga2 d1txda2 d1u5da1  
d1dbha2 d1w1ha\_ d1upqa\_ d1v5ua1 d1foea2 d2fjla1 d1eaza\_ d2dfka2  
d2cofa1 d1kz7a2 d9ltda1 d2ewda3 d1up7a1 d2dfda1 d1s6ya1 d1vjta1  
d7mdha1 d1hyea1 d1t2da1 d1ojsa3 d1ldna1 d1hyha1 d1civa1 d2a92a1  
d1ez4a1 d1i0za1 d1y6ja1 d1gv0a1 d1ur5a1 d1llda1 d1lobba1 d1v8ba1  
d1gdha1 d1l17da1 d1mx3a1 d1ygya1 d1qp8a1 d1li4a1 d1j4aa1 d2naca1  
d1npya1 d3t4ea2 d1a4ia1 d1o0sa1 d2hk9a2 d2egga2 d1b26a1 d1bvua1  
d1gq2a1 d1c1da1 d1leha1 d1gtma1 d1euzal d1nvtal d3dona2 d1edza1  
d1gpja2 d1vi2a1 d1p77a1 d1nyta1 d1b0aa1 d1vl6a1 d1v91a1 d1txga2  
d3f47a1 d1mv8a2 d2pv7a2 d1xc2a3 d2ahra2 d4xiya1 d2f1ka2 d1pgja2  
d1i36a2 d1np3a2 d1l1j8a4 d1teaa3 d1qmgaa2 d2i76a2 d2g5ca2 d1wdka3  
d1dlja2 d3cuma3 d1kola2 d1f8fa2 d1qora2 d1jqba2 d1vj0a2 d1cdoa2  
d1gu7a2 d1d1ta2 d1xa0a2 d2dm6a2 d1jvba2 d1rjwa2 d1llua2 d1h2ba2  
d1tt7a2 d1piwa2 d1o89a2 d1liz0a2 d1e3ja2 d1yb5a2 d1uufa2 d1e3ia2  
d3gpdg1 d1vc2a1 d2nvwa1 d1u8fo1 d1ydwal d1hdgo1 d2g17a1 d1cf2o1  
d2czca2 d1r0ka2 d1lobfo1 d2cvoa1 d1ebfa1 d1h6da1 d1i32a1 d1zh8a1  
d2q49a1 d1qkia1 d1j5pa4 d3pzra1 d1xeea1 d1vkoa1 d1vm6a3 d3qvsal  
d2pkqo1 d1b7go1 d1gr0a1 d1p1ja1 d1lc0a1 d1j0xo1 d3pwka1 d2hjsa1  
d1zyao1 d1vkna1 d1t1ta1 d1nvmb1 d3sjua\_ d3ojfa1 d1xu9a1 d2jjya1  
d1n7ha\_ d1y1pa1 d1h5qa\_ d1jtva\_ d4fs3a\_ d2bkaa1 d1gy8a\_ d2c5aa1  
d1ulsa\_ d1ooea\_ d2b69a1 d1y5ma1 d1spxa\_ d1ae1a\_ d1bxka\_ d1ydea1  
d1gega\_ d1hdoa\_ d1o5ia\_ d1e6ua\_ d1snya1 d2rhca\_ d3zv4a\_ d5ceja\_



d2d1ya1 d1fjha\_ d3w8ea\_ d2fmua1 d1x1ta\_ d1rpna\_ d3ay7a1 d1k2wa\_  
d1eq2a\_ d2hrba1 d3ruaa\_ d2ew8a1 d4hwka\_ d1xgka\_ d2bd0a1 d1yo6a1  
d2a35a1 d2ntva\_ d1vl8a\_ d1hdca\_ d4bkua\_ d2ag5a1 d2q45a\_ d1nffa\_  
d4iy1a\_ d1zbqa1 d1kewa\_ d1lek6a\_ d1ja9a\_ d2q46a2 d1iy8a\_ d1cyda\_  
d2ptga\_ d1hxha\_ d1uzma1 d3lyla\_ d4m89a\_ d3wyea\_ d2b11a1 d1w6ua\_  
d1sb8a\_ d2q2va\_ d4nr0a\_ d1e6wa\_ d2gasa\_ d3oiga1 d2bgka1 d1mxha\_  
d1vl0a1 d1rkxa\_ d1r6da\_ d1wmaa1 d1e7wa\_ d2c07a1 d1xkqa\_ d3tzha\_  
d1g0oa\_ d3lz6a\_ d1qyca\_ d1ledoa\_ d1gz6a\_ d1oc2a\_ d1t2aa\_ d1zema1  
d2xoxa\_ d1z45a2 d1geea\_ d1p33a\_ d3lt0a\_ d4e6pa\_ d2wyua\_ d1db3a\_  
d4q9na\_ d1xh1a\_ d4o1ma\_ d1fmca\_ d2uvda\_ d2gdza1 d1uaya\_ d2z1ma\_  
d2o23a2 d2fr1a2 d2fr1a1 d1qsga\_ d4zjua\_ d2a4ka1 d1yb1a\_ d1wvga1  
d1yxma1 d3f4ba\_ d1mg5a\_ d1xg5a1 d3nqyb\_ d4gera\_ d1bqba\_ d1cmxa\_  
d1xd3a\_ d3ifwa\_ d3u1ra1 d1kapp2 d1k7ia2 d3ioqa\_ d1fh0a\_ d1o0ea\_  
d1khqa\_ d1m6da\_ d2cb5a\_ d1cs8a\_ g8pch.1 d1s4va\_ d2pnsa\_ d1vsna1  
d1mira\_ d1iwda\_ d2oula\_ d7pcka\_ d3bwka\_ d3bcna\_ d2p86a\_ d1pvja\_  
d1pcia\_ d1gece\_ d1deua\_ d4bs6a\_ d1xkga1 d1cqda\_ d1jqpa2 d2c0ya\_  
d2bdza\_ d3p5ua\_ d2o36a\_ d1ex4a2 d1c6va\_ d2jk6a2 d2jk6a1 d1fecal  
d1fecal d1lpfa1 d1lpfa2 d1xhca1 d1xhca2 d1dx1a2 d1dx1a1 d1gera2  
d1m6ia2 d1onfa1 d1onfa2 d3lada2 d3lada1 d1w4xa1 d1w4xa2 d1gesa2  
d1mo9a1 d1xdia1 d1f12a2 d1f12a1 d1fcda1 d1fcda2 d1h6va2 d1h6va1  
d1mo9a2 d1gv4a2 d1gv4a1 d2gv8a2 d2gv8a1 d1aoga1 d1aoga2 d1hyua1  
d1ebda1 d1ebda2 d3dk9a1 d1q1ra2 d1q1ra1 d1gesa1 d3syxa1 d1mkea1  
d2p8va\_ d1xoda1 d1i7aa\_ d1evha\_ d1qc6a\_ d1legxa\_ d1o94a2 d1lqta1  
d1cjca1 d1pn0a1 d1reoa1 d1ju2a1 d2f5va1 d3c96a1 d2gmha1 d1pj5a2  
d1gpea1 d1o5wa1 d1n4wa1 d1k0ia1 d2dw4a2 d2ivda1 d2voua1 d1kdga1  
d1s5ja1 d2hbja2 d2igia\_ d1wlja\_ d1qhta1 d4dlea1 d1tgoa1 d2f96a1  
d3tr8a1 d3mxma\_ d1q8ia1 d1y97a1 d1w0ha\_ d1kfsa1 d2py5a1 d1noya\_  
d1d5aa1 d1yt3a3 d2guia\_ d3mwpal d4kb1a\_ d2v76a\_ d1wj1a1 d1aqca\_  
d1qqga2 d1qqga1 d1ntva\_ d1n3ha\_ d4dbba\_ d3f0wa1 d1p3ra\_ d1wgua1  
d2cy4a1 d3hqca\_ d1wvha1 d1xr0b1 d3nvva1 d1krha3 d2h88b1 d1n62a2  
d1t3qa2 d1kf6b2 d1zoyb1 d1jq4a\_ d1ffva2 d1rm6c2 d1r7ha\_ d1faaa\_  
d1wika1 d1xfla\_ d1ttza1 d2f51a1 d1ti3a\_ d1nhoa\_ d1sena\_ d2i4aa\_  
d1ep7a\_ d1zmaa1 d1fo5a\_ d3lefa1 d3diea1 d2yana1 d1z6na1 d1oaza\_  
d3zywa1 d4aj8a\_ d1nm3a1 d4fiwa\_ d1wmja\_ d4hs1a1 d1liloa\_ d1xwaa1  
d1wjka1 d2vm1a\_ d1fb6a\_ d1gh2a\_ d1h75a\_ d1nw2a\_ d1kx5b\_ d3a6na\_  
d4m6ba2 d2nqbd\_ d3wkjd\_ d2yfwe\_ d4h9na\_ d5bnxa\_ d3r45a\_ d1eqzb\_  
d4jjnb\_ d1f66c\_ d1eqza\_ d4wnnb\_ d1kx5a\_ d1u35c1 d1id3a\_ d2nqbc\_  
d1kx5d\_ d3us3a3 d3us3a1 d1tafa\_ d1bh9b\_ d1tafb\_ d1jfib\_ d1q9ca\_  
d1h3ob\_ d2byka1 d1n1ja\_ d4g92b\_ d1bh9a\_ d1jfia\_ d1h3oa\_ d2bykb1  
d1pd212 d1nhya2 d2a2ra2 d1k0dd2 d1f2ea2 d1gsua2 d1f3ba2 d2fhea2  
d2pvqa1 d1tw9a2 d1oyja2 d1e6ba2 d1k0ma2 d3ik7a1 d4is0a1 d1r5aa2  
d1jlva2 d1m0ua2 d3gtub2 d1z9ha2 d1okta2 d1axda2 d2gsra2 d1tu7a2  
d1k3ya2 d1zgm1 d1b48a2 d1gnwa2 d1gwca2 d2gsta2 d1glqa2 d1oe8a2  
d1pn9a2 d1v2aa2 d1fw1a2 d1duga2 d1nira1 d1qksa1 g1f8v.1 d1novc\_

d1sefa\_ d1sfna\_ d1rc6a\_ d1iyka1 d1rxta1 d1iica2 d1iica1 d1mpya2  
d1kw3b2 d1kw3b1 d4ghga1 d1tfza1 d3isqa1 d3isqa2 d1sqia1 d1sqia2  
d1lkda2 d1lkda1 d1cjxa2 d1cjxa1 d1sp9b2 d1t47a1 d1t47a2 d1f1ua2  
d1sp8a1 d1sp8a2 d1f1ua1 d1pv8a\_ d1w5qa\_ d2c1ha\_ d1l6sa\_ d1qsta\_  
d2beia1 d4m3sa\_ d1u6ma1 d1ygha\_ d1yk3a1 d3dr6a\_ d1xmta\_ d1z4ea1  
d2ge3a1 d1bo4a\_ d2fiaa1 d2jdca1 d1y9wa1 d3to7a\_ d1wwza1 d2f14a1  
d2ozua1 d2b5ga\_ d2cy2a1 d2p0wa\_ d1cm0a\_ d4pswa\_ d1yrea1 d1yr0a1  
d1m4ia\_ d2gana1 d1yvka1 d1ghea\_ d2g3aa1 d1y7ra1 d2eulia1 d1q2ya\_  
d2fsra1 d1xeba\_ d2ae6a1 d1cjwa\_ d1qsm\_ d2aj6a1 d1y9ka1 d1i12a\_  
d1vkca\_ d2atra1 d1n71a\_ d2d4pa1 d2fiwa1 d2fe7a1 d1tiqa1 d2ou2a\_  
d1yx0a1 d2fcka1 d1p0ha\_ d2j8ma\_ d2pq8a\_ d1z4ra1 d1s3za1 d1ufha\_  
d1c4qa\_ d1prtcl d2wv6d\_ d1prtfl d1ltrd\_ d4l63b1 d1r4pb\_ d1prtd\_  
d1tl0f\_ d2bosa\_ d1prtbf d3chbd\_ d1xvqa1 d1pn0a2 d3hy2a\_ d2cvba1  
d1o8xa\_ d1lu4a\_ d1we0a1 d2bmxa1 d2a4va1 d1psqa\_ d1xiya1 d1q98a\_  
d1n8ja\_ d1zofa1 d2ggta\_ d3tjja\_ d4je1a1 d1o73a\_ d3s9fa\_ d2zcta\_  
d1qmva\_ d1jfua\_ d2b1ka\_ d5dvba1 d2b5xa1 d2v2ga\_ d1st9a\_ d3tb2a\_  
d4llra\_ d4fh8a1 d1e2ya\_ d1knga\_ d2h30a\_ d1i5ga\_ d2z9sa\_ d2f8aa1  
d1tp9a1 d2b7ka\_ d1nm3a2 d3hvva\_ d2wfca1 d4kcea\_ d1xvwa1 d4gqca1  
d3qpm\_ d4k1fa\_ d1zzoa1 d1gp1a\_ d1prxa\_ d1rw1a\_ d1z3ea1 d3l78a\_  
d2m5ta\_ d1cqqa\_ d1wqsa\_ d5bpea\_ d2ipha\_ d1lvoa\_ d2bhga1 d3tnta\_  
d3sjia\_ d3d23a1 d2fyqa\_ d3tloa\_ d3zvea1 d3q3ya1 d4asha1 d1cg2a1  
d1yloa2 d1y7ea2 d1y0ya3 d1l1fwa1 d1vixa1 d1fnoa4 d1vhoa2 d1ysja1  
d1vhea2 d1z21a1 d2fvga2 d1vgya1 d1r3na1 d2grea2 d1xmba1 glq71.1  
d1etha2 d1w52x1 d2ppla1 d1hpla2 d1lpbb2 d2oxea1 d1rpla2 d1bnla\_  
d1dy2a\_ d1lgya\_ d4l3wa\_ d1llfa\_ d1gz7a\_ d1lukca\_ d2hqya1 d2hqya2  
d1lrza2 d1lrza3 d1ne9a2 d3groa\_ d1pjaa\_ d1ei9a\_ d1svpa\_ d1mbma\_  
d3su6a1 d1cula1 d4agka\_ d1vcpa\_ d1q31a\_ g1n11.1 d3e90b\_ d1ep5a\_  
d3u1jb\_ d3zxha\_ d1rm8a\_ d1leaka2 d1hy7a\_ d2jsda\_ d1cxva\_ d1hv5a\_  
d1i76a\_ d3p0ya1 d1lgra1 d1lgra2 d1n8yc1 d1m6ba2 d1m6ba1 d1m4la\_  
d2bk7a\_ d3fjua\_ d1z5ra1 d1kwma1 d1uwy2 d1jqga1 d2c1ca1 d1tdta\_  
d1h8la2 d1h6ua2 d1lmra\_ d1cixa\_ d1y29a\_ d1v7fa\_ d2jtba\_ d1d1ha\_  
d1g9pa\_ d1lupa\_ d1qk7a\_ d1mb6a\_ d2a2va\_ d1niya\_ d1i25a\_ d1hvwa\_  
d2mpqa\_ d1ie6a\_ d1kqha\_ d1la4a\_ d2mxoa1 d1koza\_ d1qk6a\_ d1emxa\_  
d1lqra\_ d1c6wa\_ d1rmka\_ d1eyoa\_ d1cna\_ d1fu3a\_ d1g1pa\_ d1f3ka\_  
d1fyga\_ d1rypd\_ d1lrua\_ d1rypc\_ d3unfk\_ d1rypa\_ d1j2pa\_ d1lru1\_  
d1j2qh\_ d3unfh\_ d1m4ya\_ d1rypb\_ d1lru1\_ d1lru1\_ d1lru2\_ d1q5rh\_  
d1rypg\_ d1g3ka\_ d1q5qa\_ d1e94a\_ d1lru1\_ d1lru1\_ d3ty6a\_ d1lru1\_  
d1lruk\_ d1rype\_ d1lru1\_ d1lru1\_ d3mi01\_ d1rypf\_ d1lru1\_ d2z3ba\_  
d1lruc\_ d3mka2\_ d1lru1\_ d1ny721 d1a6ca3 d1a6ca2 d1a6ca1 d1pgl22  
d1pgl21 d1pgl11 d1ny711 d1jgta2 d1ofda3 d1ea0a3 d1q15a2 d1ct9a2  
d1ao0a2 d1te5a\_ d3ubub\_ d1legia\_ d1qo3c\_ d1v7pa\_ d1tdqb\_ d3ubua\_  
d1c3ab\_ d1h8ua\_ d3bx4b\_ d1t8ca1 d1sb2a1 d1qdda\_ d2ziba1 d3cada\_  
d1byfa\_ d1j34b\_ d1jwia\_ d1jzna\_ d1c3aa\_ d1oz7b\_ d1wmza\_ d3bdwb\_  
d1hq8a\_ d1fifa1 d1dv8a\_ d3hupa\_ d1wk1a1 d1umra\_ d2afpa\_ d3bx4a\_

d1gz2a\_ d1sl6a\_ d1v7pb\_ d3g8ka\_ d1ixxa\_ d1j34a\_ d1jwib\_ d1glsa1  
d1y17a1 d1ja3a\_ d1fvub\_ d3bdwa\_ d1sb2b1 d1fvua\_ d1umrc\_ d1oz7a\_  
d4m17a\_ d3cfwa1 d1ypqa1 d1g1ta1 d3fd4a\_ d3l9jc\_ d4dn8a1 d1v4lb\_  
d1rd1l\_ d2msba\_ d3ia2a\_ d1a88a\_ d4dgqa1 d1hkha\_ d1zoia\_ d4lt9a1  
d3tc7a1 d3hoja\_ d1i4na\_ d3vnda\_ d3n18a1 d1geqa\_ d3naval d1v5xa\_  
d4a2ra1 d3tc6a1 d4ijba\_ d1xcfa\_ d1vc4a\_ d1rd5a\_ d1qopa\_ d3b5va\_  
d2r80b\_ d1cqxa1 d1cg5a\_ d1gcvb\_ d3boma\_ d2h8fb\_ d2raoa\_ d3bj1a\_  
d4hrrb\_ d2r50a\_ d3d1kb\_ d2aa1b1 d3zhwa\_ d3hf4b\_ d3gdja\_ d1jebb\_  
d3bj1b\_ d1x9fb\_ d1wmub\_ d1gcva\_ d3bcqb\_ d3d4xb\_ d2dc3a\_ d3hf4a\_  
d4yu3a\_ d3k8ba\_ d1qpwb\_ d2r80a\_ d3bcqa\_ d1v4wa\_ d3wtgb\_ d1jl7a\_  
d4esaa\_ d1a9we\_ d3d1ab\_ d1fsla\_ d4h21a\_ d1v4wb\_ d1mwca\_ d1vhba\_  
d1jeba\_ d1spgb\_ d1h97a\_ d1q1fa\_ d1tu9a1 d3d1aa\_ d1hdsb\_ d3hyub\_  
d2zfb\_ d3fs4a\_ d1oj6a\_ d1shrb\_ d4h21b\_ d4yu3b\_ d1spga\_ d3hrwa\_  
d3qqra\_ d3at5a\_ d4wchd\_ d3hyua\_ d1cg5b\_ d1uc3a\_ d1hbra\_ d2raob\_  
d1outb\_ d4esab\_ d3gdjb\_ d3qqqa\_ d1x9fc\_ d3vrfa\_ d1litha\_ d3mkba\_  
d3d4xa\_ d3mjpa\_ d1jl6a\_ d3fh9a\_ d1outa\_ d2dc3b\_ d1lit2a\_ d3eoka\_  
d3g46a\_ d1qpwa\_ d3vrfb\_ d1ch4a\_ d1x9fd\_ d1hdsa\_ d2zfa\_ d3mkbb\_  
d1or4a\_ d3wtga\_ d1a4fa\_ d3fh9b\_ d3bomb\_ d3cy5a\_ d3at5b\_ d1x9fa\_  
d2oifa\_ d4lmb\_ d1cpcb\_ d3v57a\_ d1kn1a\_ d1cpca\_ d4f0ta\_ d2vjha\_  
d4po5b\_ d1eyxa\_ d1alla\_ d4f0tb\_ d1b33b\_ d4h0mb\_ d1b33a\_ d2vjhb\_  
d4lmb\_ d2vmlb\_ d1allb\_ d2vjta\_ d3dbja\_ d2vmla\_ d2vjtb\_ d4f0ub\_  
d1f99b\_ d4rmpa1 d1liaa\_ d1eyxb\_ d2uulb\_ d4lmsb\_ d4f0ua\_ d2bv8a\_  
d1f99a\_ d2bv8b\_ d2c71b\_ d3dbjb\_ d4rmpb1 d1b8da\_ d4h0ma\_ d3v57b\_  
d1kn1b\_ d1liab\_ d2uula\_ d2j96a\_ d4dv8a2 d1j7na1 g1gxs.1 g1wht.1  
d1azwa\_ d1mtza\_ d2xqfa\_ d1ea5a\_ d1f6wa\_ d1dx4a\_ d1qe3a\_ d1k4ya\_  
d4qwwa\_ d2ha2a\_ d3c8da2 d2pbla1 d1jjia\_ d1lzl\_ d1jjfa\_ d1gl9b1  
d1gkub2 d4iuua3 d4bvva\_ d5hpga\_ d3k65a\_ d1ki0a3 d1ki0a2 d1ki0a1  
d1a0ha1 d1pmla\_ d3sp8a3 d2feba1 d1f74a\_ d3l21a\_ d2e1da\_ d1to3a1  
d1w3ia\_ d1sfla\_ d1n7ka\_ d1vcva1 d4imea\_ d1wa3a\_ d2ocza1 d1f2ja\_  
d3m16a\_ d2yxga\_ d1ub3a\_ d3a5fa\_ d1fbaa\_ d1l6wa\_ d1xfba1 d1wx0a1  
d1vpxa1 d1ojxa\_ d1mxsa\_ d2a4aa1 d1xkya1 d3cq0a1 d3s1xa\_ d1f05a\_  
d1fdja\_ d3cpa1 d4d2ja\_ d1e88a1 d1l6ja5 d1l6ja4 d1eaka4 d1eaka3  
d1l6ja3 d1h8pa2 d1h8pa1 d3rp2a\_ g1lucy.1 d1fuja\_ d2zchp\_ d3w94a\_  
d1si5h\_ d1lo6a\_ g2pka.1 d1cgha\_ d1kigh\_ d1a5ia\_ d3s9ba\_ d1hj8a\_  
d1ao5a\_ d2anya\_ d1q3xa1 d1gvza\_ d1azza\_ d4gsoa\_ d2f91a1 d1iaua\_  
d1gdna\_ d1eufa\_ g1fiw.1 d1eq9a\_ d4nfea\_ d2rdla\_ d1spja\_ d1elva1  
d1a7sa\_ d1ekbb\_ d1pfxc\_ d1yc0a\_ d2aiqa\_ g1fiz.1 d1fi8a\_ d4k60a\_  
d4dgja\_ d1mzaa\_ d1op0a\_ d3tjva\_ d1pytd\_ d1sgfg\_ g1gg6.1 d2eeka\_  
g1rtf.1 d1a0ja\_ d3g01a\_ d1pytc\_ d4e7na\_ d1ddja\_ d1z8ga1 d2hlca\_  
d1npma\_ d1brup\_ g1jou.1 d1sgfa\_ d1autc\_ g2hnt.1 g1kdq.1 d1orfa\_  
d3s69a\_ d4crga\_ d1fxya\_ d1ra6a\_ d1muka\_ d3gsza\_ d1khva\_ d1te9a\_  
d2xwha\_ d3uqsa\_ d3hkwa\_ d3n6ma\_ d2cjqa\_ d2xyma\_ d1teba\_ d1te8a\_  
d1s48a\_ d1u09a1 d4wfxa\_ d3tyqa\_ d2pgga1 d1dzka\_ d4tlja\_ d2a2ua\_  
d4wfva\_ d3t1da\_ d4iaxa\_ d3zq3a\_ d2nnda\_ d1i4ua\_ d1kxoa\_ d1bbpa\_

d1kt7a\_ d1exsa\_ d3s26a1 d1lf7a\_ d1qfta\_ d4gh7a\_ d1z24a1 d1qabe\_  
d1xkia\_ d3bx7a\_ d4iawa1 d1n0sa\_ d1gkab\_ d3kzaa\_ d2k23a\_ d2l9ca1  
d2joza1 d1gm6a\_ d3kffa\_ d3saoa1 d1e5pa\_ d1yupa1 d1iiua\_ d3lgia\_  
d3i77a\_ d2z9ia2 d4nsva\_ d1lcya2 d4jyna\_ d1agja\_ d1os8a\_ d1hpga\_  
d1p3ca\_ d1l1ja\_ d1qtfa\_ d1e69a\_ d1mv5a\_ d3g60a4 glii8.1 d1ewqa2  
d1ji0a\_ d1qhla\_ d1v43a3 d2wmfa1 d1vpla\_ d1g2912 d4a82a2 glf2t.1  
d2d62a1 d3tuic1 d2bbsa1 d3g60a3 d2ixea\_ d1g6ha\_ d1sgwa1 d2qi9c\_  
d3rlfa1 d3b60a1 d3d31a2 d2pzea1 glxew.1 d1jj7a\_ d1oxxk2 d2onka1  
d1wlwa\_ d1iwea\_ d1qf5a\_ d1vmaa2 d1nija1 d1np6a\_ d2p67a1 d3ihla\_  
d1okkd2 d1ls1a2 d1s1ma2 d1iona\_ d2v40a\_ d1dj3a\_ d3hida\_ d2vola1  
d2g0ta1 d1vcoa2 d1j8mf2 d1g3qa\_ d1xjca\_ d1p9ba\_ d1qzxa3 d1ihua2  
d2qm8a\_ d1dj2a\_ d4ioja\_ d1cp2a\_ d1yrba2 d1hyqa\_ d3gqba2 d1skye3  
d1xp8a1 d1tf7a2 d1tf7a1 d1ye8a1 d1skyb3 d2qe7d2 d4blta\_ d4huta\_  
d3l1daa2 d4hyya\_ d2i3ba1 d1cr1a\_ d3j9tb2 d3ntua2 d1vdza1 d2z43a\_  
d1e9ra\_ d1nlfa\_ d3ziaa2 d1n0wa\_ d3ziad2 d3j9ta2 d1pzna2 d3gqbb2  
d2i49a\_ d1nnfa\_ d1xvxa\_ d1ursa\_ d1h3da1 d1iuda\_ d4mlva1 d1twya\_  
d3e13x\_ d2nxoa1 d4pfua\_ d3ttma\_ d1elja\_ d2qmwa1 d1us5a\_ d1y3na1  
d1jeta\_ d1uqwa\_ d4f19a1 d2esna2 d3thia\_ d3fasa1 d2uyeb\_ d2xwva1  
d1r9la\_ d2fyia1 d1pb7a\_ d2ozza1 d1sw5a\_ d1nh8a1 d1vr5a1 d2g29a\_  
d1xs5a\_ d3lswa\_ d2z23a\_ d3w9va\_ d3tcha\_ d1q35a\_ d1z7me1 d3q27a\_  
d1p99a\_ d1ve4a1 d2i6ea1 d4mcoa1 d4n8ya\_ d1eu8a\_ d1zba1 d1hsla\_  
d1ixca2 d1j1na\_ d1xvya\_ d1y9ua\_ d2z22a1 d1xoca1 d4oera\_ d1wdna\_  
d5f1qa1 d1xt8a1 d4gwoa\_ d4igta1 d1pc3a\_ d4mmpa1 d1o63a\_ d2czla1  
d2onsa2 d4mija1 d1eh3a\_ d3skpa\_ d1dtza1 d1ieja\_ d1jnfa2 d1ce2a1  
d1jnfa1 d1b1xa2 d1b1xa1 d1jw1a1 d1jw1a2 d1ryoa\_ d1h76a1 d1h76a2  
d1c4oa1 d2p6ra3 d2p6ra4 d1oywa2 d1oywa3 d1wrba1 d1w36b2 d1w36b1  
d1c4oa2 d3bora\_ d1t6na\_ d2eyqa5 d2eyqa3 d2eyqa2 d2zu6a2 d1veca\_  
d1uaaa1 d1w36d1 d2g9na1 d1z3ix2 d2rb4a\_ d1hv8a1 d1hv8a2 d1t5ia\_  
d1w36c2 d2j0sa2 d2j0sa1 d3hjha1 d1z5za1 d1qdea\_ d1z63a1 d1s2ma2  
d1s2ma1 d1wp9a1 d1wp9a2 d1gm5a3 d1gm5a4 d3dina4 d3dina3 d1q0ua\_  
d1w36c1 d1z3ix1 d1nkta3 d1nkta4 d1uaaa2 d1w36d2 glqhh.1 d2fwra2  
d2fwra1 d2fkza\_ d1zujal d1s3qa1 d2fjca1 d1z6om1 d1veia\_ d4dyya\_  
d1jiga\_ d3gvya\_ d2pyba\_ d4cy9a1 d3bvfa1 d1r03a\_ d2cf7a\_ d1nf4a\_  
d1zs3a1 d4iwka\_ d3ka8a\_ d3np0x\_ d1n1qa\_ d1lb3a\_ d4e6ka\_ d1z6oa1  
d2fzfa1 d4dyua\_ d3ge4a\_ d1jgca\_ d4am4a\_ d2z6ma\_ d1ji5a\_ d1vlga\_  
d1lkoal d1krqa\_ d3qz3a\_ d1o9ra\_ d2ffxj\_ d1euma\_ d1yv1a1 d2v2pa\_  
d1j30a\_ d4di0a\_ d1dpsa\_ d1oewa\_ d2qzxa\_ d2asia\_ d1psoe\_ d1smra\_  
d2h6ta\_ d1pfza\_ d1lizda\_ d3hd8a\_ d1j71a\_ d1dpja\_ d4aa9a\_ d1t6ex\_  
glb5f.1 gl1ya.1 glhtr.1 d1qdma2 d1bxoa\_ d1wkra\_ d1tzsa\_ d1libqa\_  
d2qzwa\_ d1bdqa\_ d3ggta\_ d3ixoa\_ d1mrxa\_ d2haha\_ d1tw7a\_ d4njsa\_  
d1sgua\_ d2p3da\_ d1nsoa\_ d3d3ta\_ d2rkfa\_ d2rspa\_ d3ogpa\_ d3ekwa\_  
d2o4na\_ d2j9ja\_ d1baia\_ d3ggua\_ d3lzua\_ d4npua\_ d4j55a\_ d2r8na\_  
d2fxda\_ d2p3ca\_ d4dqea\_ d3ttpa\_ d3t3ca\_ d2p3aa\_ d2hc0a\_ d2fdda\_  
d3mwsa\_ d1wgra1 d1ef5a\_ d1wfyal d1e8ya3 d1wgyal d1l1fda\_ d2cs4a1

d1wxma1 d2byea1 d3kh0a1 d2byfa1 d1wxaa1 d1e7ua3 d1zbfal d2z1ha\_  
d2etja1 d3qioa1 d1j11a\_ d2e41a\_ d1j12a\_ d21sna1 d1uaxa\_ d2yv0x\_  
d1mu2a1 d1ekea\_ d1i39a\_ d1wgda1 d1wgga1 d4q5eb\_ d1wjna1 d1se9a\_  
d3n3kb\_ d1wz0a1 d1we6a1 d2m0xa\_ d2gbka\_ d3rt3b1 d1wh3a1 d1sifa\_  
d2ekec2 d4ii2b1 d4hk2a1 d1c3ta\_ d1m94a\_ d1wgha1 d1ttna1 d1j8ca\_  
d1wx8a1 d3v6cb1 d2ma9b\_ d4i61b1 d1bt0a\_ d2jvca1 d1iyfa\_ d2k1fa\_  
d1wxva1 d1wf9a1 d1t0ya\_ d2io0b2 d1x1ma1 d2gbma\_ d1zw7a1 d2m17a\_  
d1ud7a\_ d1we7a1 d2lwpa\_ d2gbja\_ d1wjua1 d1v6ea1 d1v86a1 d4eewa\_  
d1wiaa1 d4icva\_ d4gu2a\_ d1wx7a1 d1wy8a1 d4hjka1 d2faza1 d1v5oa1  
d3ruib\_ d3waob\_ d2r2qa1 d3m95a\_ d3wana\_ d4lu0a\_ d1of8a\_ d3unda1  
d3e9aa1 d1vr6a2 d2qkfa\_ d1d9ea\_ d1o60a\_ d2h0ba\_ d2erfa\_ d1h30a2  
d1h30a1 d3mw4a1 d1pz7a\_ d2r1ba\_ d3v64a1 d1d2sa\_ d3bopa1 d3mw3a1  
d1okqa1 d2ftba\_ d1pmpa\_ d2rcqa1 d4lkpa\_ d1sa8a\_ d1vyfa\_ d1lpja\_  
d3vg7a1 d4azqa1 d1o8va\_ d5bvqa\_ d1p6pa\_ d2qo4a\_ d1opba\_ d1yiva1  
d1o1va\_ d4bvma1 d4tkba\_ d4i3ba\_ d1bwya\_ d1ftpa\_ d1ggla\_ d4gkca\_  
d1cbia\_ d3p6da1 d1kqwa\_ d2a0aa1 d1um8a\_ d1ixza\_ d1qvra2 d1qvra3  
d1sxjc2 d1jr3d2 d2p65a\_ d1l8qa2 d1g8pa\_ d3hu3a3 d1sxjd2 d1njfa\_  
d1in4a2 d1sxja2 d1tuea1 d2ce7a2 d1w5sa2 d1sxjb2 d1d2na\_ d1ny5a2  
d1ofha\_ d2gnoa2 d2a5yb3 d1fnna2 d1u0ja1 d1lv7a\_ d1iqpa2 d2fnaa2  
d1ixsb2 d4gita\_ d1sxje2 d1g41a\_ d21j7a\_ d2m8bb1 d2kyqa\_ d3psma\_  
d1jkza\_ d1jxca\_ d2g11a\_ d1ugla\_ d4uj0a\_ d2k4ua\_ d1hp2a\_ d2lu9a\_  
d1baha\_ d2meoa1 d1wm7a\_ d1hlya\_ d1n8ma\_ d1jlza\_ d1wpda\_ d1c55a\_  
d1pvza\_ d1wt7a\_ d1rjia\_ d1wz5a\_ d1m2sa\_ d1pjva\_ d1c49a\_ d2ktca1  
d1wmta\_ d1du9a\_ d1j5ja\_ d1rlga\_ d1t0za\_ d2i61a\_ d1t1ta\_ d1sn4a\_  
d1kv0a\_ d21kba\_ d1npia\_ d1wwna\_ d1pe4a\_ d2kbka\_ d21i7a\_ d1djta\_  
d2kbha\_ d1dq7a\_ d1sega\_ d1omya\_ d1zywa1 d1jzaa\_ d1n9wa1 d1bbua1  
d1e1oa1 d1c0aa1 d1b8aa1 d3a74a1 d1eova1 d1iyjb4 d1iyjb5 d1iyjb3  
d1o7ia\_ d4ipca1 d1x3ea\_ d4apva\_ d1jb7a1 d1jb7a2 d1jb7a3 d3kdfa\_  
d1ue1b\_ d1wjja1 d3eiva\_ d1xjva2 d1xjva1 d2ccza2 d1se8a\_ d1l1oc\_  
d1jb7b\_ d1qvca\_ d3ulla\_ d1qzga\_ d1miua4 d1miua5 d1miua3 d3g48a1  
d1gd7a\_ d1jjcb3 d1pyba\_ d1y14b1 d2nn6i1 d1i94l\_ d2zjra2 d1smxa\_  
d2qamc2 d1hh2p1 d2r7da1 d1rl2a2 d1wfga1 d3bzka4 d1x6oa2 d3a0ja\_  
d2j01d2 d2ja9a1 d4q15a\_ d1hr0w\_ d1luza\_ d2n3sa\_ d2vnud1 d1h95a\_  
d1go3e1 d2nn6h1 d1ne3a\_ d2mola\_ d1iz6a2 d1jjga\_ d2ix0a3 d2ix0a2  
d2lxja\_ d1ueba3 d1ueba2 d2z0sa1 d1u01a1 d2ix0a1 d2eifa2 d2je6i1  
d3i2za1 d2c35b1 d2ahob2 d1t9ha1 d3i4oa\_ d2qall1 d1jt8a\_ d2nn6g1  
d1g6pa\_ d3cama\_ d1i94q\_ d1c9oa\_ d1d7qa\_ d2ba0a1 d2vnud2 d2vnud3  
d1khia2 d2qalq1 d1wi5a1 d1xtda2 d1ny4a\_ d1dgsa2 d1ckma1 d1p16a1  
d1x9na2 d1pfsa\_ d2a1ka\_ d1je5a\_ d1rpma\_ d2shpa1 d1yfoa\_ d1l8ka\_  
d2ooqa1 d1g4us2 d1p15a\_ d1lara2 d1lara1 d1wcha\_ d2fh7a2 d2fh7a1  
d1ohea1 d2f4da\_ d1rxda\_ d2hxpa\_ d1xria\_ d1d5ra2 d1fpza\_ d3ezza\_  
d4y2ea\_ d1i9sa\_ d3azya\_ d3wvja\_ d1upsa1 d1ajoa\_ d2hyka\_ d1ajka\_  
d2vy0a\_ d1o4ya\_ d3o5sa\_ d3d6ea\_ d3atga\_ d1dypa\_ d1lumza\_ d3i4ia\_  
d1c11a\_ d41bqa\_ d1a78a\_ d1slta\_ d4no4a\_ d3zsja\_ d3duia\_ d1g86a\_

d1is3a\_ d1qmja\_ d1hlca\_ g1qmo.1 g1len.1 d3zyra\_ d1fnya\_ d1n47a\_  
g21tn.1 d1avba\_ d3usua\_ d1dhkb\_ d1f9ka\_ d1lukga\_ d1g8wa\_ d1g9fa\_  
d1wbfa\_ d3wcsa\_ d1g7ya\_ g1loe.1 d1mvqa\_ d1hq1a\_ d1v6ia\_ d1dbna\_  
d1qnwa\_ d1fx5a\_ d4l8qa\_ d1ioaa\_ d3n35a\_ d3ubra\_ d1qo8a1 d1d4ca1  
d2k3va\_ d1ft5a\_ d1qdba\_ d1m1qa\_ d2j7aa\_ d1h21a\_ d4fasa\_ d1jnia\_  
d1oaha\_ d1sp3a\_ d3h33a\_ d1rwja\_ d1os6a\_ d3bxua\_ d3h4na\_ d1i77a\_  
d3caoa\_ d1j0pa\_ d2ctha\_ d1duwa\_ d1ofwa\_ d2e84a\_ d1hh5a\_ d1gyoa\_  
d3h34a\_ d1dszb\_ d1a6ya\_ d3cbba\_ d1ynwa1 d1r4ia\_ d1hcqa\_ d2hana\_  
d2hanb\_ d2enval d1kb4b\_ d2n11b\_ d1lola\_ d1cita\_ d1adqa1 d1fnga1  
d1uvqb1 d1zs8a1 d2vola1 d2vola2 d1mfb12 d2jelh2 d1uwel2 d3qq4b1  
d1kjob\_ d1k5na1 d1osph2 d4odh12 d1ow0a1 d1ow0a2 d1bfob2 d3l9ra2  
d3jtth1 d2fath2 d4elkb2 d1fn4b2 d2xfxb\_ d1pg7x2 d1cqka\_ d4k71b2  
d1l2a1 d1eapb2 d4l1fhg2 d1i4fa1 d2nw2a2 d1kfah2 d1mhca1 d1h3ua1  
d1wejh2 d1h0db2 d1a5fh2 d1kcvh2 d1mjuh2 d1qqda1 d1kcrh2 d1k8ia1  
d3huja2 d2nnab1 d1nfd2 d3mffb2 d1s9va1 d1l3h2 d1q0x12 d1fv1b1  
d1neza1 d4rfeb2 d1r3ha1 d1a6tb2 d1kjva1 d1pz5b2 d1onqa1 d2bc4a2  
d1de4a1 d1k8da1 d1tcra2 d1dn0b2 d1nfd2 d2xwtb2 d1bfoa2 d1mexh2  
d1iakb1 d1ypzf2 d4f7ea2 d1q7212 d2fbjh2 d1fe8h2 d1clzh2 d1fngb1  
d1uvqa1 d1vgka1 d1c16a1 d4j12a2 d4x99b2 d1igtb3 d1je6a1 d1q72h2  
d1nldh2 d1teth2 d2hmic2 d1i1ca2 d1i1ca1 d1k8ib1 d1q0yh2 d1kfa12  
d3frua1 d1pg7w2 d1u58a1 d1igyb4 d1igyb3 d1hyrc1 d1klub1 d1deeb2  
d1c12b2 d2bc4b2 d2ig2h2 d1kcv12 d3wn5b1 d1l2b\_ d1l312 d1mjul2  
d1sm3h2 d1q0xh2 d1zvsal d1ydpal d1u8ib2 d1ypze2 d1kcu2 d1op9a\_  
d1y0la1 d1etzb1 d1legj11 d2gsib1 d1nj9a1 d4jfhd1 d1aqk11 d1t2ja\_  
d1lo4h1 d1zvya1 d3v4v11 d4enec1 d1kxtb\_ d5e8ea1 d2pxya\_ d4weud\_  
d1xiwc\_ d2esvd1 d1qznh\_ d1logae1 d1f4xh1 d4n1hb\_ d3ezjb1 d3mlw11  
d1kfah1 d1etza1 d1b4jh1 d3cfic\_ d4w68a\_ d2arja1 d1ek3a\_ d2ok011  
d1vera\_ d1uwgh1 d1blnb1 d1fpth1 d1rzga1 d2giya1 d4m3kb1 d1nc2a1  
d2nyyd1 d1ncna\_ d1fbih1 d5dxwa\_ d4fqqa1 d1dgdh1 d1jfq11 d1kelh1  
d1faih1 d1frgl1 d1fig11 d4m6n11 d1fo0a\_ d4hxb11 d3b5ga\_ d3quyd1  
d2h9gb1 d1i8kb\_ d2dd8h1 d2ck0h1 d1eaja\_ d4w6wb1 d2a6ib3 d1t66d1  
d2e27h\_ d1ob1b1 d1f11b1 d2v7na1 d1ad0a1 d2xt1b1 d1pskh1 d4i13b1  
d2op411 d1a0q11 d1uwel1 d1za3a1 d1ncb11 d4uu9a\_ d1bm3h1 d1cloh1  
d1nqba2 d1cf8h1 d4y5va\_ d1mhph1 d5anma1 d4cdgc1 d4ldeb\_ d1y01b1  
d2pcpb1 d1z3gl1 d1dfb11 d1fh5h1 d3g5xa1 d1tzib1 d4dn311 d3zhka1  
d2b1hh1 d2uy1a1 d1f3dh1 d1nj9b1 d2agjh1 d2h1p11 d1q72h1 d8fabb1  
d1ndmb1 d1rjca1 d4u6hb1 d3upca\_ d2fbj11 d1osph1 d1tvda\_ d2cjh\_  
d4fhbd1 d1bd2d1 d1rz7h1 d3nn8a\_ d1blna1 d1knoa1 d1nfda1 d2bmkb1  
d1dq11\_ d1igyb1 d12e8h1 d3utza1 d1nc2b1 d1rihh1 d4mwfb1 d4jvpa1  
d1mieh1 d1rhfa1 d1fgn11 d1sbsh1 d1lp9e1 d1dn0a1 d4lqf11 d1iaih1  
d1kgcd1 d1mh5b1 d1gpol1 d2g60h3 d1f8t11 d2jixd1 d4grwh\_ d1fo0b\_  
d1bfob1 d1axsa1 d1u9ka\_ d1nmbh\_ d1h8na1 d1h8na2 d1jguh1 d4eura1  
d3sdy11 d35c8h1 d1w7211 d1mvub\_ d1i9rh1 d1ob1a1 d4wenb\_ d1yeeh1  
d3ietc1 d1f58h1 d1ad0b1 d1mqk1\_ d1nbvh1 d4b50a\_ d3r8bb\_ d1baf11

d1mamh1 d4rgne1 d2gsgb\_ d35c8l1 d1bafh1 d1ailh1 d2pcpa1 d2fath1  
d2x1pa\_ dlorsb1 d1libgl1 d1shma\_ d1a2yb\_ d1u0qa\_ d2coqa\_ dlhilb1  
d1qfwi\_ d1jv5b\_ d1fn4b1 d5e0qa\_ d1nsh1 d1plgl1 d4ocxl1 d1kb5h1  
d1rzfh1 d1pg7x1 d2fx7h1 d2oi9c\_ d1l7il1 d3eyva1 d1d5il1 d4ffyl\_  
d1tetl1 d1a6wh\_ d1ac6a\_ d3dvfa\_ d1nfde1 d1mimh1 d1ri8a1 d1jhlh\_  
d3dura\_ d1fskb1 d1f97a1 d3so3b1 d2ak4d1 d1lp9f1 d4z7wf1 d1l7th1  
d4y5ya\_ d4x7ec1 d1emth1 d1likfl1 d1nlbh1 d4utal1 d1bjma1 d1leapb1  
d1u6ah1 d2dtgd1 d1kj2b\_ d1xeda1 d1c1eh1 d1fgvh\_ d2bnub1 d2fb4h1  
d2dtgb1 d1ktrh\_ d1jpth1 d1qkz11 d4hepg\_ d2atpb1 d1flrh1 d2hrpl1  
d1mvfa\_ d1iaim1 d3k80a1 d2jb5h1 d3zkxc\_ d4grwe\_ d1it9h1 d1rhhb1  
d3w9ec\_ d1e4wh1 d1sy6h1 d2j6eh1 d3qxta\_ d1jglh1 d1p7ka1 d1tzhb1  
d4n8pa1 d1gaf11 d2jelh1 d1wioa2 d4i0cc1 d1cicb1 d1lmka2 d1lmka1  
d1iqwh1 d1orqb1 d1ejoh1 d1jnlh1 d4zga\_ d43c9b\_ d1ggbl1 d1wejh1  
d3q6fa1 d1f3dj1 d3c6la1 d1bqlh1 d3p9wb\_ d1a3r11 d1h0db1 d2uzil\_  
d1eo8l1 d1qfwl\_ d1n7ml1 d1igja1 d1c5ch1 d2a9mh\_ d1rmfh1 d1fj1b1  
d4heme\_ d1ccza1 d1a5fh1 d1ogad1 d1dlfh\_ d1qa9b\_ d1vgel1 d3qskb\_  
d1sjxa\_ d4ozfg1 d1sq2n\_ d1qd0a\_ d1kcvh1 d1c5db1 d3qcull d8faba1  
d3bn9d1 d1mjuh1 d4y8dc\_ d7fabh1 d3dvgb1 d1lo0l1 d1a6tb1 d1gigh1  
d1kcrh1 d2hwz11 d1yjdc1 d3clfl1 d4krna\_ d1d17l\_ d1e6ol1 d1mexh1  
d3r0ma\_ d4kkna\_ d1fns11 d1oaqh\_ d1rza1 d1ucbh1 d1ncwl1 d4b41a\_  
d1nfdfl d2mpah1 d2d7tl1 d4grwf\_ d4b5ea\_ d1lk3h1 d3u79a\_ d4u3xa\_  
d1ghfl1 d1bvkb\_ d1mcww1 d1b88a\_ d1jrrh1 d32c2b1 d4wemb\_ d1dsfh\_  
d1op3h1 d1ce1l1 d1iqda1 d1qoka1 d1qoka2 d1qfuh1 d2crya1 d1ay1h1  
d1oaql\_ d3ab0b\_ d1rur11 d1t4kb1 d1bz7b1 d1n0xh1 d1for11 d1lucb11  
d4w6yb\_ d43c9a\_ d2aabl1 d1tzia1 d4n1ca\_ d1k6qh1 d3g9ab\_ d4tvsa1  
d1igmh\_ d1pz5b1 d3dx9a1 d3wxwh\_ d1nakh1 d1kcull d3eaka\_ d4qlra1  
d1cr9l1 d1d9ka\_ d1f4x11 d1deea1 d2i27n2 d1c12a1 d2orb11 d1j8hd1  
d1mcp11 d1c5da1 d1kenh1 d1bd2e1 d1h5ba\_ d4x7fc1 d3upaa\_ d1t3fa1  
d1indh1 d2dtgc1 d4hc111 d1zv5a1 d4wgvb\_ d1uwgl1 d4f37k1 d1aqkh1  
d1vesa\_ d3zkqd\_ d1fpt11 d1lo4l1 d1knob1 d3rrqa\_ d1ct8b1 d4orz\_ c\_  
d1mlbb1 d4hgkc1 d1dqdl1 d1bogb1 d4ozhe1 d1dr9a1 d1i7za1 d1dn0b1  
d1kell1 d1rzib1 d1ypzf1 d1wtla\_ d1hkfa\_ d1fail1 d1figh1 d2vyre\_  
d1sjva\_ d1ohqa\_ d1bfoa1 d1pkqb1 d1mjul1 d1b4jl1 d1nsl1 d2arjb1  
d1p4bh\_ d4aj0a\_ d3nn8b\_ d2rcja1 d1f2xk\_ d4v1dd\_ d1adqh1 d2eksa\_  
d4k3ga\_ d1jfqh1 d1uweh1 d1frgh1 d4gftb\_ d1uz8b1 d4nlea\_ d1bm3l1  
d1clol1 d3mcka1 d2vq1a1 d1ae6h1 d4aq1b1 d1uj3b1 d1nbqa1 d1fh5l1  
d2ck0l1 d2ywza\_ d1q72l1 d4nxbx\_ d1hila1 d4hz1b1 d2j88l1 d1zmya1  
d1cd0a\_ d1a4ka1 d1psk11 d1a0qh1 d4krmb\_ d1ncbh1 d2fbjh1 d1j8he1  
d1i3ua\_ d1cf8l1 d1fe8h1 d2p1ya1 d1eeqa\_ d2x89a\_ d1ol0a\_ d2r0lh1  
d1ub5a1 d1dfbh1 d3eyvb1 d4jdvb1 d4p2cg\_ d2gsia1 d2agjl1 d1u3ha1  
d2h1ph1 d1rih11 d1fskc1 d1boga1 d2a77l1 d1ospl1 d1qfoa\_ d3dwta\_  
d2fx7l1 d1rz7l1 d3stba1 d1pkqa1 d1b6da1 d1dzba2 d1dzba1 d1kj2a\_  
d4l1ha\_ d1rzgb1 d1dq1h\_ d1e8l1 d1miel1 d1jmaa\_ d1sbs11 d1fgnh1  
d1f58l1 d1mqkh\_ d1ndgb1 d3qegl1 d1iail1 d2aw2a1 d1tqbc1 d3fo2a1

d4dkaa\_ d1f8th1 d2g60l1 d2ywy\_ dluj3a1 d1yc7a\_ d3bd3a\_ d4w6xb1  
d1nmb1\_ d1i8ka\_ d1rjlb1 d1ypze1 d1p7kb1 d1kxqe\_ d1gpoh1 d2z4qa1  
d1w72h1 d1i9r1l d4qgya1 d4xt1c\_ d2qqnh1 d1cica1 d3c08h1 d2cd0a\_  
d2bdnh1 d1hnga1 d1mam1 d1nldh1 d1cr9h1 d4lcih1 d3bkyh1 d3qg7l1  
d1ai1l1 d1kxvc\_ d4iosd\_ d1l7ih1 d2x1qa\_ d1ub6b1 d3k74b\_ d1ibgh1  
d1teth1 d1igya1 d1hxma1 d2x6ma\_ d2e7la\_ d5e03a\_ d1qfwm\_ d2r0kh1  
d1igjb1 d1rurh1 d1plgh1 d1mj8h1 d1yuhb1 d3fmg1l d1rzfl1 d1emt1l  
d1ad9b1 d1igtb1 d1nlbl1 d1d5ih1 d3k7ua\_ d4ffyh\_ d1bwwa\_ d3dvga1  
d1a6ta1 d1fgvl\_ d4qxgl1 d1mim1l d1jh1l\_ d2hffb1 d2hh0l1 d1qkzh1  
d1l7t1l d1afvh1 d1iaii1 d2cjuh\_ d1um5h1 d2ghwb2 d2ghwb1 d1kgce1  
d2fgwh1 d1ikfh1 d1dvfd\_ d2i24n1 d2xtjb\_ d1za3b1 d2yc1a\_ d2hh0h1  
d2x1oa\_ d1bvka\_ d1rjla1 d5e7ba1 d1igta1 d1il1b1 d2fb4l1 d1mvua\_  
d1jpt1l d32c2a1 d1fvca\_ d1iqdb1 d2hrph1 d2p4ab\_ d4qo1a\_ d1p2cb1  
d1wt5c\_ d1t4ka1 d5c1mb\_ d1it9l1 d1bz7a1 d1b2wh1 d1e4wl1 d1jnl1l  
d1yedb1 d1za6b1 d3u7aa\_ d1igfh1 d3gnm1l d1orsa1 d1wejl1 d1a2ya\_  
d1hxmb1 d1gafh1 d2j4wh1 d1pz5a1 d1j05a\_ d1a3rh1 d4fq1l1 d1qfwh\_  
d1eo8h1 d1n7mh1 d4s11a\_ d1kegh1 d5da4a\_ d1iqwl1 d3whxb1 d1vgeh1  
d1deeb1 d1c12b1 d1t2ql1 d1ad9a1 d3gsnb1 d3b2uc1 d1ggbh1 d1t3fb1  
d1nak1l d4ocmc\_ d1lila1 d2v7hb3 d2esve1 d1mcoh1 d2qr0b1 d2q3aa\_  
d1ct8a1 d1kcr1l d2pxyb\_ d2uzih\_ d5c3ld\_ d3durb\_ d1c5cl1 d2ak4e1  
d1dl7h\_ d1xiwd\_ d1mlba1 d1rmf1l d1i7zb1 d1dlfl\_ d2xa3a\_ d5bq7b1  
d1dqqb1 d3h42l1 d1egjh1 d1kcv1l d1fe8l1 d2j6e1l d1f3rb2 d1lk3l1  
d1sm3h1 d1q0xh1 d1ghfh1 d7fab1l d1igch1 d1lo0h1 d4idla\_ d5c2bl\_  
d1jrh1l d1il1a1 d3zhda1 d4kfzc\_ d1b0wa\_ d1e6oh1 d1mex1l d4krpb\_  
d1fnsh1 d1ncwh1 d4hgma\_ d4eigb1 d4rzca\_ d2mpa1l d4y5xa\_ d5en2b1  
d3lrga1 d4ej1c1 d1rhha1 d1j05b\_ d1forh1 d1q9wb1 d2wzpd\_ d2aq2a1  
d1h0da1 d3revb1 d2ij0c1 d1tzha1 d4m7j1l d1k6ql1 d3b9kc1 d1igml\_  
d3qeua1 d1dsfl\_ d1ce1h1 d1kcuh1 d1zvha1 d1zvoa1 d1tqbb1 d1ay1l1  
d2qsc1l d2cgrh1 d1nl0h1 d1ken1l d3eo0a1 d4n9ob1 d1n0xl1 d3k1kc\_  
d2m9wa1 d3dfxa\_ d2aq2b1 d1ck1a1 d1enfa1 d1i4pa1 d1vloa1 d1et9a1  
d1esfa1 d2g9hd1 d4ohja1 d1klud1 d1bxta1 d1eu3a1 d1ty0a1 d1fnua1  
d2qaln1 d2cqva1 d1fhga\_ d2k1ma\_ d2d12a1 d1biha3 d1biha1 d1biha4  
d3qp3a1 d1g1ca\_ d1gxea\_ d1cvsc2 d1cvsc1 d1xmwa2 d1m4ka2 d2otpa2  
d1biha2 d1rhfa2 d2fcba2 d2fcba1 d1wwbx\_ d1gsma2 d1lepfa1 d1lepfa2  
d2dava1 d1waaa\_ d1f97a2 d1x44a1 d1vcaa2 d1fnla2 d1fnla1 d3b5ha2  
d3h8na2 d3h8na1 d1jbja1 d1jbja2 d1pd6a\_ d1f2qa2 d1f2qa1 d3cx2a\_  
d1nbqa2 d3b5ha1 d1n26a1 d1xiwb\_ d1xaua\_ d1fltx\_ d2ifga1 d1olla1  
d1olla2 d1cs6a4 d1cs6a3 d1cs6a2 d1cs6a1 d2gw5a2 d1sy6a1 d1xiwa\_  
d1lucta2 d1lucta1 d1ry7b2 d1gl4b\_ d1qz1a3 d1olza1 d2c9aa1 d1wwca\_

**Family-89 (d.3.1.1)**

**Positive dataset contains 13 protein sequences.**

d3ioqa\_ d2pnsa\_ d1vsna1 d2oula\_ d3bwka\_ d3bcna\_ d2p86a\_ d1pvja\_  
d4bs6a\_ d1xkga1 d2c0ya\_ d2bdza\_ d3p5ua\_

**Negative dataset contains 4043 protein sequences.**



d1m32a\_ d1libja\_ d1c7na\_ d4q75a\_ d2bkwa1 d1t3ia\_ d1n8pa\_ d1qz9a\_  
d1jf9a\_ d1eg5a\_ d1p3wa\_ d3kgwa\_ d1c11a\_ d2ctza1 d1vjoa\_ d2rfva\_  
d1gc0a\_ d1cs1a\_ d1d2fa\_ d2ch1a1 d1qgna\_ d1pffa\_ d1elua\_ d1ax4a\_  
d1c7ga\_ d2v1pa1 d2ez1a\_ d1u08a\_ d11c5a\_ d1b5pa\_ d2ay1a\_ d3pd6a\_  
d7aata\_ d2csta\_ d1j32a\_ d1fg7a\_ d4wlha\_ d1o4sa\_ d1v2da\_ d1gdea\_  
d1m6sa\_ d1v72a1 d1svva\_ d1ajsa\_ d1wsta1 d2f8ja2 d11k9a\_ d1vp4a1  
d1xi9a1 d2gb3a1 d1yaaa\_ d2bnma2 d1xkla\_ d2wfla\_ d3rcha\_ d3k40a\_  
d1pmma\_ d1xkta1 d2hfka\_ d5d3ka\_ d2b5aa1 d2ofya1 d4mcxa\_ d2xi8a\_  
d2icta\_ d2bnma1 d2ppxa1 d1y7ya1 d1sefa\_ d1sfna\_ d1sq4a\_ d1i26a\_  
d1f56a\_ d1bypa\_ d1azca\_ d1ws8a\_ d3u25a\_ d1cuoa\_ d1id2a\_ d1rkra\_  
d2iaac\_ d4dp1x\_ d1nwpa\_ d2gima\_ d2i7sa\_ d1qhqa\_ d3ehbb1 d1fftb1  
d1gyca3 d1hfua2 d1kbva1 d1kbva2 d1sdda1 d1sdda2 d1gyca1 d1gyca2  
d1mzya1 d2bw4a1 d1aoza1 d1aoza3 d1aoza2 d1kyaa2 d1kyaa3 d1kyaa1  
d1mzya2 d4e9sa1 d1sddb1 d1sddb2 d1hfua1 d1hfua3 d1oe1a2 d1oe1a1  
d1v10a2 d1v10a3 d1v10a1 d2cfba1 d1dfoa\_ d1o69a\_ d1bj4a\_ d3k28a\_  
d2bwpa\_ d3lg0a\_ d2fnua\_ d3ou5a\_ d1z7da1 d1b9ha\_ d1iaya\_ d4msoa\_  
d1bs0a\_ d1s0aa\_ d1sffa\_ d3tqxa\_ d1mdoa\_ d3qboa\_ d3pgya\_ d1bjna\_  
d2dkja\_ d1ejia\_ d1vefa1 d4wxga\_ d3bs8a\_ d3gbxa1 d1w23a\_ d1a3qa1  
d1iknc\_ d3brda1 d1p7hl1 d1oy3c\_ d1imhc1 d1gjia1 d1zk9a1 d2cxka1  
d2bema\_ d1pama1 d1ea9c1 d1qhoa1 d2fhfa2 d2fhfa1 d1k3ia1 d1j0ha1  
d1cxla1 d2bhua1 d1edqa1 d1f1sa2 d1lut9a2 d1gvia1 d1txka1 d1zx5a1  
d1qwra\_ d2ph1a2 d2ph1a1 d1fxza2 d1fxza1 d1lrha\_ d1uija1 g1dgw.1  
d2v09a\_ d1uika2 d1uika1 d1dgwa\_ d1lep0a\_ d2pa7a1 d1wlta1 d1nxma\_  
d2c0za1 d1ds6b\_ d1fstb\_ d1g0da1 d3us3a3 d3us3a1 d1cg2a1 d1yloa2  
d1y7ea2 d1y0ya3 d11fwa1 d1vixa1 d1fnoa4 d1vhua2 d1ysja1 d1vhea2  
d1z2la1 d2fvga2 d1vgya1 d2grea2 d1xmba1 g1q7l.1 d1rtqa\_ d1r0ka3  
d1vkoa2 d1vm6a2 d3qvsa2 d1gr0a2 d1p1ja2 d2ovga\_ d1sq8a\_ d1rzsa\_  
d3kz3a\_ d3orca\_ d3gpdg2 d2q49a2 d1hdgo2 d2g17a2 d2cvoa2 d2czca1  
d3pwka2 d1obfo2 d1i32a2 d1zyao2 d2pkqo2 d1b7go2 d2hjsa2 d1cf2o2  
d1vkna2 d1nvmb2 d1ux8a\_ d4i0va\_ d2bkma\_ d1dlwa\_ d2bmma\_ d2msya\_  
d2djoa1 d2r5za\_ d1au7a1 d1f43a\_ d21mda1 d1akhb\_ d1s7ea1 d3nara\_  
d1zq3p1 d2craa1 d1mija\_ d4uuta\_ d3a01a\_ d1x58a1 d3rkqa1 d3cmya1  
d2cqxa1 d2da6a1 d1e3oc1 d1fjla\_ d1mh3a1 d1ig7a\_ d1x41a1 d1wh7a1  
d1gt0c1 d2mw8a\_ d11fup\_ d1x2ma1 d1b72a\_ d1wi3a1 d1jgga\_ d1wjha1  
d1x2na1 d1mnmc\_ d2cuea1 d3k2aa\_ d2hosa\_ d2jwta2 d1pufa\_ d1oactc1  
d2hi3a\_ d1b8ia\_ d4j19a\_ d3lnqa\_ d1wh5a1 d1b8ib\_ d1fexa\_ d2cqra1  
d1guua\_ d1ug2a1 d2cqqa1 d2ajea1 d4a69c\_ d1h8ac1 d2crga1 d2iw5b1  
d1xc5a1 d2cu7a1 d1wgxa1 d2cjja1 d2ckxa1 d1gvda\_ d1tc3c\_ d1gdta1  
d1u78a2 d2iu5a1 d1zk8a1 d2g7sa1 d2fd5a1 d2np5a1 d1z0xa1 d2id6a1  
d2d6ya1 d2i10a1 d1vi0a1 d2oi8a1 d3c07a1 d2ns7a1 d2fq4a1 d2yvea1  
d1t33a1 d2o7ta1 d1rkta1 d2np3b1 d2g7ga1 d2gena1 d2fbqa1 d2g71a1  
d2gfna1 d2g3ba1 d2jj7a1 d2hyja1 d1sgma1 d1ui5a1 d2hkua1 d2id3a1  
d4jyka1 d1b10a1 d1b10a2 d1d5ya2 d3lv8a\_ d1s3ga1 d1zaka1 d1s4qa\_  
d3tvta2 d1uf9a\_ d1khta\_ d1ckea\_ d1osna\_ d1p5zb\_ d4tmka\_ d3cm0a\_

d1tmka\_ d1jaga\_ d3h86a\_ d1t0hb\_ d1nn5a\_ d2h92a\_ d3kb2a1 d2c95a1  
d1yj5a2 d1kgda\_ d1ly1a\_ d2ak3a1 d1vyva2 d1deka\_ d2grja1 d1p3ja1  
d1y63a\_ d1e4ya1 d1s96a\_ d3iija1 d1lvga\_ d1nksa\_ d1vyua2 d4e22a\_  
d1qf9a\_ d1jjva\_ d1q3ta\_ d1ki9a\_ d1lw7a2 d1teva\_ d1kjwa2 d2iyva2  
d1viaa\_ d1e6ca\_ d1m7ga\_ d1x6va3 d1g3ma\_ d1j99a\_ d1t8ta1 d1nsta\_  
d1zrha\_ d1ls6a\_ d2a3ra\_ d1aqua\_ d2zptx\_ d3ckla\_ d1teta\_ d1q44a\_  
d2gwha\_ d1z0ja1 d3umra2 d3gj0a1 d2gaoa1 d1yzga1 d1x3sa1 d1g7sa4  
d1puja\_ d1udxa2 d1kk1a3 d2o52a\_ d1jwyb\_ d1zcaa2 d1zcba2 d2fv8a1  
d2cjwa\_ d3dz8a1 d1xzpa2 d1vg8a\_ d4qxaa\_ d2ew1a1 d1x1ra1 d2bcgy\_  
d3doea1 d3cona\_ d3rega\_ d3wyga\_ d1upta\_ d2b6ha1 d1zd9a1 d1lnza2  
d1r5ba3 d1n0ua2 d1r2qa\_ d2f91a1 d2rhda\_ d3q3jb\_ d3q85a\_ d1efma1  
d1r8qa\_ d2gf9a1 d2akab1 d1ek0a\_ d1z08a1 d2gcoa1 d2dy1a2 d4g01b\_  
d2cxxa1 d1svia\_ d3q72a\_ d1ni3a1 d4ac9a4 d2erxa1 d2bmea\_ d1wxqa1  
d2gf0a1 d4ldja1 d1zunb3 d1d5ca\_ d4lv5b\_ d1efca3 d1kmqa\_ d2g6ba1  
d3lrpa\_ d1tada2 d2y8ea\_ d4rd4a1 d1z06a1 d2heia\_ d3a58b\_ d1u01a2  
d1d2ea3 d1zj6a1 d2ocba\_ d3rwoa\_ d1mr3f\_ d2e9sa1 d4u5xa1 d2iwra\_  
d2fn4a1 d3bwdd\_ d2nzja1 d2atva1 d2ksqa\_ d3l43a\_ d1mkya2 d1mkya1  
d1wmsa\_ d1jnja3 d2rmka\_ d1f6ba\_ d1f60a3 d1gota2 d1jala1 d2fh5b1  
d1g16a\_ d2wblc\_ d1m7ba\_ d1wf3a1 d1f5na2 d1t9ha2 d1z6xa1 d1z0aa1  
d2fg5a1 d2a5ja1 d2bcjq2 d1s0ua3 d1ky3a\_ d4y0va\_ d4lhwa\_ d2qmea1  
d2atxa1 d1legaa1 d1ryha\_ d1moza\_ d1nrjb\_ d2erya1 d3bfka\_ d1puia\_  
d1fzqa\_ d3j3az1 d3t5ga\_ d1shza2 d3defa\_ d2f7sa1 d3raba\_ d3tsoa\_  
d3aaq4a\_ d2a17a1 d3sfva1 d3bc1a\_ d2ncda\_ d1sdma\_ d3h4sa1 d2heha\_  
d2grya\_ g3kin.1 d1kk8a2 d1br2a2 d1goja\_ d1f9va\_ d2mysa2 d1lkxa\_  
d3t0qa\_ d4db1a1 d3gbja\_ d1ry6a\_ d1v8ka\_ d1k8ka2 d1k8ka1 d3uleb1  
d3i33a2 d3i33a1 d1bupa1 d1dkgd2 d4ci6a2 d1jcfa1 d4a2ba2 d2fxua1  
d1yaga2 d1yaga1 d4cbua2 d1bupa2 d3vrda1 d3vrda2 d1fcdc1 d1h1oa2  
d1h1oa1 d1m70a2 d1m70a1 d1liqca2 d1liqca1 d1eb7a2 d1eb7a1 d1nmla2  
d3h1jd1 d1hroa\_ d4gedb\_ d3zooa\_ d1mz4a\_ d1gu2a\_ d1f1fa\_ d1dvva\_  
d1c6ra\_ d1c75a\_ d1e29a\_ d1gdva\_ d1cnoa\_ d1h32b\_ d1co6a\_ d2bh4x\_  
d2aiua\_ d5cytr\_ d1jdl\_ d1i8oa\_ d2zboa\_ d3dmia\_ d1ls9a\_ d1wvec\_  
d2yk3a\_ d3ph2b\_ d1dw0a\_ d5aura\_ d1ql3a\_ d1qn2a\_ d1f1ca\_ d4zzva\_  
d2xspa\_ d1leg1a\_ d4v20a\_ d4ipma1 d1gpia\_ d4csia\_ d3pfza\_ d3ovwa\_  
d2yoka\_ d2nqya\_ d1h4ga\_ d1oa2a\_ d1olra\_ d3b7ma\_ d4h7ma1 d3wp3a\_  
d2vgda\_ d1ligoa\_ d3zsea\_ d2nlra\_ d3wx5a\_ d1oa3a\_ d1pvxa\_ d1m4wa\_  
d1f5ja\_ d1oa4a\_ d1ks5a\_ d4ixla1 d1evsa\_ d1cnt1\_ d1pvhb\_ d1z7ca\_  
d1huwa\_ d1rhga\_ d1f6fa\_ d1f45b\_ d1i1rb\_ d1axia\_ d1letea\_ d3tgxb\_  
d1scfa\_ d2z3qa1 d3qb1a\_ d1hula\_ d1m48a\_ d4nkqb\_ d1v7mv\_ d5e4ea\_  
d2o27a\_ d3b5ka\_ d2psma1 d4zf7a\_ d3uf5a\_ d4x51a\_ d1d9ca\_ d4ypgc1  
d3oq3a\_ d1lqsl\_ d1n1fa\_ d1au1a\_ d1lwu3i\_ d3bes1\_ d3ux9a\_ d3rbaa\_  
d2qtra\_ d1nupa\_ d3l92a\_ d1f9aa\_ d1qjca\_ d2h29a\_ d1vlha\_ d1od6a\_  
d1lw7a1 d1mrza2 d4ruka\_ d2e17a\_ d1liq0a2 d1irxa2 d1r6ta2 d1ivsa4  
d2cyba\_ d1rqga2 d1j09a2 d2yxna\_ d1f7ua2 d1h3fa1 d1ffya3 d2g36a1  
d1nzza\_ d1jila\_ d1n3la\_ d1pfva2 d1h3na3 d3n9ia\_ d3sz3a1 d3sw2a\_

d1moxc\_ d1dx5i3 d1ledmb\_ d1lautl2 d1lautl1 d1dval1 d1szba2 d1kigl\_  
d2y5fl\_ d1lijqa2 d1lgk5a\_ d1gl1sa2 d1nt0a3 d1xdtr\_ d1lmja2 d1lmja1  
d1nzia2 d2wphe\_ d1klil\_ d1pfxl2 d1pfxl1 d1p9ja\_ d1g1ta2 d1f7ea\_  
d4yzub\_ d1lr7a1 d2mgpa1 d1b9wa1 d1b9wa2 d2mgpa2 d1ob1c1 d1n1ia2  
d1n1ia1 d2npra2 d2npra1 d2y5ia\_ d1qlsa\_ d1psra\_ d3n22a\_ d2egda\_  
d4ggfc\_ d2wcea\_ d2luca\_ d4aqia\_ d3nsia\_ d2lp3a\_ d1j55a\_ d1a4pa\_  
d1nsha\_ d1pvaa\_ d3fs7a\_ d2pvba\_ d1ttxa\_ d1rwya\_ d2kyfa\_ d1rk9a\_  
d1a75a\_ d1exra\_ d1tiza1 d1nyaa\_ d1g8ia\_ d1ggwa\_ d1wdcc\_ d3fwba\_  
d1ggza\_ d2o5ga\_ d1ctaa\_ d1m45a\_ d3i5gc\_ d1sl8a\_ d1fpwa\_ d2scpa\_  
d2roaa\_ d4aqra\_ d3pn7b\_ d1br1b\_ d2mysb\_ d1s6ca\_ d1bjfa\_ d2obha\_  
d1jfka\_ d1jf0a\_ d1qv0a\_ d1lkja\_ d2mlfc\_ d2m97a\_ d2d8na\_ d4by5a\_  
d1jbaa\_ d4nqga\_ d1wdcb\_ d2mysc\_ d1j7qa\_ d1s6ia\_ d1uhka2 d1r2ua\_  
d1dtla\_ d3kf9a\_ d3pn7c\_ d1qjta\_ d1fi6a\_ d1c07a\_ d5d67d\_ d1tuza\_  
d1eg3a1 d1eg3a2 d2zkmx1 d1snla\_ d1gjya\_ d1y1xa\_ d1hqva\_ d1dvia\_  
d1df0a1 d4usla\_ d1k94a\_ d1wkya2 d1uuqa\_ d3wh9a\_ d4mlra\_ d1xyza\_  
d4xuya\_ d2je8a5 d4bf7a1 d3cuia\_ d1ur4a\_ d1qw9a2 d1odza\_ d2vzsa5  
d1bqca\_ d2x2ya1 d1hjqa\_ d1qnra\_ d4y7ea1 d1vjza\_ d4k68a\_ d2v3ga\_  
d4hpga\_ d1nofa2 d1nq6a\_ d1h4pa\_ d1aq0a\_ d3ziza\_ d4bs0a\_ d1lecea\_  
d1h1na\_ d1ta3b\_ d1w91a2 d1ilwa\_ d1uhva2 d1us3a2 d1legza\_ d7a3ha\_  
d1tvna1 d3nyda1 d1ghsa\_ d2cyga1 d4xv0a\_ d2c8na2 d1w32a\_ d3emca\_  
d1v6ya1 d1foba\_ d2uwfa1 d2fgla\_ d3niya1 d2c0ha1 d1rh9a1 d1yq2a5  
d1szna2 d1fa2a\_ d1pama4 d5do8a1 d1ea9c3 d1hx0a2 d2fhfa5 d1qhoa4  
d1avaa2 d1m53a2 d4m8ua1 d2gjpa2 d1lwha2 d4howa1 d1ktba2 d1j0ha3  
d3vm5a1 d2x1ia\_ d1wzaa2 d1uasa2 d2diea1 d1mxga2 d1ht6a2 d1iv8a2  
d5cpsa\_ d1ud2a2 d1zjaa1 d3gbea1 d1kwga2 d1wdpa\_ d1gcya2 d1g5aa2  
d1hvxa2 d3dhpa2 d2bhua3 d4do4a1 d3qgva1 d1e43a2 d1g94a2 d2d3na2  
d1gjwa2 d1gvia3 d1x1na1 d1r7aa2 d1tz7a1 d3c8da2 d2pbla1 d1jkma\_  
d1jjia\_ d1lzl1a\_ d4toqa\_ d1wb0a1 d1w9pa1 d1eoka\_ d1litxa1 d1kfwal  
d1goia2 d2gsja\_ d1hjxa1 d1jnda1 d1vf8a1 d3wdpp1 d3wq5a\_ d1gnxa\_  
d4gxpa\_ d4hz8a\_ d1e4mm\_ d3aiua\_ d1wcca1 d1qvba\_ d3ahxa\_ d1v02a\_  
d2dgaa\_ d1pbga\_ d1vffa1 d1qoxa\_ d4ha4a\_ d1e5wa2 d1j19a2 d1isna2  
d2a16b2 d3syxa1 d2p8va\_ d1xoda1 d1i7aa\_ d1evha\_ d1qc6a\_ d1legxa\_  
d1x14a1 d3vsqa\_ d2gixa1 d1p7ba1 d2v76a\_ d1wj1a1 d1qqga2 d1qqga1  
d1ntva\_ d1n3ha\_ d4dbba\_ d3f0wa1 d1p3ra\_ d1wgua1 d2cy4a1 d3hqca\_  
d1wvha1 d1xr0b1 d1wgqa1 d1v89a1 d2coda1 d1zc3b\_ d1wg7a1 d1u5ea1  
d1v61a1 d2coca1 d2ys1a1 d1v5pa1 d1ntya2 d1wjma1 d1wila1 d1u29a\_  
d1xx0a1 d1unqa\_ d2zkmx3 d1fhoa\_ d1v88a1 d2adza1 d1x1fa1 d1p6sa\_  
d2coaa1 d1btka\_ d1v5ma1 d1faoa\_ d2x18a\_ d1dyna\_ d1x1ga1 d4kaxb\_  
d2j59m1 d1ki1b2 d1xcga2 d1txda2 d1u5da1 d1dbha2 d1wlha\_ d1upqa\_  
d1v5ua1 d1foea2 d2fjla1 d2dfka2 d2cofa1 d1kz7a2 d1d4ua2 d9ldta1  
d2ewda3 d1up7a1 d2dfda1 d1s6ya1 d1vjta1 d7mdha1 d1hyea1 d1t2da1  
d1ojsa3 d1b8pa1 d1ldna1 d1hyha1 d1civa1 d2a92a1 d1ez4a1 d1i0za1  
d1y6ja1 d1gv0a1 d1ur5a1 d1ll1da1 d1lobba1 d1npya1 d3t4ea2 d1a4ia1  
d1o0sa1 d2hk9a2 d2egga2 d1b26a1 d1bvua1 d1gq2a1 d1c1da1 d1leha1

d1gtma1 d1euza1 d1nvtal d3dona2 d1ledza1 d1gpja2 d1vi2a1 d1p77a1  
d1nyta1 d1b0aa1 d1vl6a1 d1v9la1 d1txga2 d3f47a1 d1mv8a2 d2pv7a2  
d1xc2a3 d2ahra2 d4xiya1 d2f1ka2 d1pgja2 d1np3a2 d1lj8a4 d1teaa3  
d1qmgga2 d2i76a2 d2g5ca2 d1wdka3 d1dlja2 d3cuma3 d1kola2 d1f8fa2  
d1qora2 d1jqba2 d1vj0a2 d1cdoa2 d1gu7a2 d1d1ta2 d1xa0a2 d2dm6a2  
d1jvba2 d1rjwa2 d1llua2 d1h2ba2 d1tt7a2 d1piwa2 d1o89a2 d1iz0a2  
d1e3ja2 d1yb5a2 d1uufa2 d1vj1a2 d3gpdg1 d1vc2a1 d2nvwal d1u8fo1  
d1ydwa1 d1hdgo1 d2g17a1 d1cf2o1 d2czca2 d1r0ka2 d1obfo1 d2cvoal  
d1ebfa1 d1h6da1 d1i32a1 d1zh8a1 d2q49a1 d1qkia1 d3pzra1 d1xeaa1  
d1vkoa1 d1vm6a3 d3qvsa1 d2pkqo1 d1b7go1 d1gr0a1 d1p1ja1 d1lc0a1  
d1j0xo1 d3pwka1 d2hjsa1 d1zyao1 d1vkna1 d1tlta1 d1nvmb1 d3sjua\_  
d3ojfa1 d1xu9a1 d2jjya1 d1n7ha\_ d1ylpa1 d1h5qa\_ d1jtva\_ d4fs3a\_  
d2bkaa1 d1gy8a\_ d2c5aa1 d1ulsa\_ d1ooea\_ d2b69a1 d1y5ma1 d1spxa\_  
d1aela\_ d1bxka\_ d1ydea1 d1gega\_ d1hdoo\_ d1o5ia\_ d1e6ua\_ d1snya1  
d2rhca\_ d3zv4a\_ d5ceja\_ d2d1ya1 d1fjha\_ d3w8ea\_ d2fmua1 d1x1ta\_  
d1rpna\_ d3ay7a1 d1eq2a\_ d2hrba1 d3ruaa\_ d2ew8a1 d4hwka\_ d1xgka\_  
d2bd0a1 d1yo6a1 d2a35a1 d2ntva\_ d1vl8a\_ d1hdca\_ d4bkua\_ d2ag5a1  
d2q45a\_ d1nffa\_ d4iy1a\_ d1zbqa1 d1kewa\_ d1ek6a\_ d1ja9a\_ d2q46a2  
d1iy8a\_ d1cyda\_ d2ptga\_ d1hxha\_ d1uzma1 d3lyla\_ d4m89a\_ d3wyea\_  
d2b1la1 d1w6ua\_ d1sb8a\_ d2q2va\_ d4nr0a\_ d1e6wa\_ d2gasa\_ d3oiga1  
d2bgka1 d1mxha\_ d1vl0a1 d1rkxa\_ d1r6da\_ d1wmaa1 d1e7wa\_ d2c07a1  
d1xkqa\_ d3tzha\_ d1g0oa\_ d3lz6a\_ d1qyca\_ d1ledoa\_ d1gz6a\_ d1oc2a\_  
d1t2aa\_ d1zema1 d2xoxa\_ d1z45a2 d1geea\_ d1p33a\_ d3lt0a\_ d4e6pa\_  
d2wyua\_ d1db3a\_ d4q9na\_ d1xhla\_ d4o1ma\_ d1fmca\_ d2uvda\_ d2gdza1  
d1uaya\_ d2z1ma\_ d2o23a2 d2fr1a2 d2fr1a1 d1qsga\_ d1qyda\_ d4zjua\_  
d2a4ka1 d1yb1a\_ d1wvga1 d1yxma1 d3f4ba\_ d1mg5a\_ d1xg5a1 d1r55a1  
d3gboa\_ d1atla\_ d1kufa\_ d1buda\_ d4q1la\_ d1quaa\_ d1ypla\_ d1wnia\_  
d3nqyb\_ d4gera\_ d3u1ra1 d1kapp2 d1k7ia2 d1zoya1 d1qo8a2 d1d4ca2  
d1chua2 d1jnra2 d1kf6a2 d2jk6a2 d2jk6a1 d1feca1 d1feca2 d1lpfa1  
d1lpfa2 d1xhca1 d1xhca2 d1dx1a2 d1dx1a1 d1gera2 d1m6ia2 d1onfa1  
d1onfa2 d3lada2 d3lada1 d1w4xa1 d1w4xa2 d1gesa2 d1mo9a1 d1xdia1  
d1fl2a2 d1fl2a1 d1fcda1 d1fcda2 d1h6va2 d1h6va1 d1mo9a2 d1gv4a2  
d1gv4a1 d2gv8a2 d2gv8a1 d1aoga1 d1aoga2 d1hyua1 d1ebda1 d1ebda2  
d3dk9a1 d1q1ra2 d1q1ra1 d1gesa1 d1g4ma1 d1g4ma2 d1pn0a1 d1reoal  
d1ju2a1 d2f5va1 d3c96a1 d2gmha1 d1pj5a2 d1gpea1 d1n4wa1 d1k0ia1  
d2dw4a2 d2ivda1 d1seza1 d2voua1 d1kdga1 d1s5ja1 d2hbja2 d2igia\_  
d1wlja\_ d1qhta1 d4dlea1 d1tgoa1 d2f96a1 d3tr8a1 d3mxma\_ d1q8ia1  
d1y97a1 d1w0ha\_ d1kfsa1 d2py5a1 d1noya\_ d1d5aa1 d1yt3a3 d2guia\_  
d3mwpal d4kb1a\_ d1js9c\_ d1f15b\_ d1za7a\_ d1b9ra\_ d1offa\_ d1frfa\_  
d3wcqa\_ d1e9ma\_ d1l5pa\_ d1wria\_ d1i7ha\_ d3av8a\_ d1czpa\_ d1rfka\_  
d3p1ma1 d3b2ga\_ d2bt6a2 d4iuua3 d4bvva\_ d5hpga\_ d3k65a\_ d1ki0a3  
d1ki0a2 d1ki0a1 d1a0ha1 d1pmla\_ d3sp8a3 d2feba1 d3nvva1 d1krha3  
d2h88b1 d1n62a2 d1t3qa2 d1zoyb1 d1jq4a\_ d1ffva2 d1dgja2 d1rm6c2  
d1jmx2 d1pbya1 d1pbya2 d1r7ha\_ d1faaa\_ d1wika1 d1xfla\_ d1ttza1

d2f51a1 d1ti3a\_ d1nhoa\_ d1sena\_ d2i4aa\_ d1ep7a\_ d1zmaa1 d1fo5a\_  
d3lefa1 d3diea1 d2yana1 d1z6na1 d1oaza\_ d3zywa1 d4aj8a\_ d1nm3a1  
d4fiwa\_ d1wmja\_ d4hs1a1 d1liloa\_ d1xwaa1 d1wjka1 d2vm1a\_ d1fb6a\_  
d1gh2a\_ d1h75a\_ d1nw2a\_ d1kx5b\_ d3a6na\_ d4m6ba2 d2nqbd\_ d3wkjd\_  
d2yfwe\_ d4h9na\_ d5bnxa\_ d1kx5c\_ d3r45a\_ d1eqzb\_ d4jjnb\_ d1f66c\_  
d1eqza\_ d4wnnb\_ d1kx5a\_ d1u35c1 d1id3a\_ d2nqbc\_ d1kx5d\_ d1ku5a\_  
d1f1ea\_ d1tafa\_ d1bh9b\_ d1tafb\_ d1jfib\_ d1q9ca\_ d1h3ob\_ d2byka1  
d1n1ja\_ d4g92b\_ d1bh9a\_ d1h3oa\_ d2bykb1 d1n1jb\_ d1pd212 d1nhya2  
d2a2ra2 d1k0dd2 d1f2ea2 d1gsua2 d1f3ba2 d2fhea2 d2pvqa1 d1tw9a2  
d1oyja2 d1e6ba2 d1k0ma2 d3ik7a1 d4is0a1 d1r5aa2 d1jlva2 d1m0ua2  
d3gtub2 d1z9ha2 d1okta2 d1axda2 d2gsra2 d1tu7a2 d1k3ya2 d1zgm1  
d1gnwa2 d1gwca2 d2gsta2 d1glqa2 d1oe8a2 d1pn9a2 d1v2aa2 d1fw1a2  
d1duga2 d1a0rp\_ d1ig8a1 d1czan2 d1czan3 d1czan1 d1ig8a2 d1czan4  
d1bg3a3 d1bg3a2 d1bg3a1 d1qsaa2 d21j7a\_ d1n4na\_ d2m8bb1 d2kyqa\_  
d3psma\_ d1jxca\_ d2g11a\_ d1ugla\_ d4uj0a\_ d1qqya\_ d1gd6a\_ d1f6ra\_  
d1ivma\_ d2gv0a\_ d1iiza\_ d2z2fa\_ d1j8xa\_ d1ghla\_ d1b9oa\_ d1741a\_  
d1691a\_ d2o4wa\_ d1p37a\_ d1k28a3 d1xjta1 d1jtma\_ d2f2qa\_ d4e97a1  
d2pjsa1 d1k11a\_ d2i7ra1 d1eicsa\_ d1xqaa1 d5cj3a1 d1npba\_ d1jifa\_  
d2p7oa\_ d1r9ca\_ d1mpya2 d1kw3b2 d1kw3b1 d4ghga1 d1tfza1 d3isqa1  
d3isqa2 d1sqia1 d1sqia2 d1lkda2 d1lkda1 d1mpya1 d1cjxa2 d1cjxa1  
d1sp9b2 d1t47a1 d1t47a2 d1f1ua2 d1sp8a1 d1sp8a2 d1f1ua1 d1s5ja2  
d1qhta2 d4dlea2 d1tgoa2 d3py8a2 d1q8ia2 d1kfsa2 d2py5a2 d1d5aa2  
d1qsta\_ d2beia1 d4m3sa\_ d1u6ma1 d1ygha\_ d1yk3a1 d3dr6a\_ d1xmta\_  
d1z4ea1 d2ge3a1 d1bo4a\_ d2fiaa1 d2jdca1 d1y9wa1 d3to7a\_ d1wwza1  
d2f14a1 d2ozua1 d2b5ga\_ d2cy2a1 d2p0wa\_ d1cm0a\_ d4pswa\_ d1yrea1  
d1yr0a1 d1m4ia\_ d2gana1 d1yvka1 d1ghea\_ d2g3aa1 d1y7ra1 d2euia1  
d1q2ya\_ d2fsra1 d1xeba\_ d2ae6a1 d1cjwa\_ d1qsma\_ d2aj6a1 d1y9ka1  
d1i12a\_ d1vkca\_ d2atra1 d1n71a\_ d2d4pa1 d2fiwa1 d2fe7a1 d1tiqa1  
d2ou2a\_ d1yx0a1 d2fcka1 d1p0ha\_ d2j8ma\_ d2pq8a\_ d1z4ra1 d1s3za1  
d1ufha\_ d1c4qa\_ d1prtcl d2wv6d\_ d1prtfl\_ d1l1trd\_ d4l63b1 d1r4pb\_  
d1prtd\_ d1t10f\_ d2bosa\_ d1prtb1 d1xvqa1 d1pn0a2 d3hy2a\_ d2cvba1  
d1o8xa\_ d1lu4a\_ d1we0a1 d2bmx1 d2a4va1 d1psqa\_ d1xiya1 d1q98a\_  
d1n8ja\_ d1zofa1 d2ggta\_ d3tjja\_ d4je1a1 d1o73a\_ d3s9fa\_ d2zcta\_  
d1qmva\_ d1jfua\_ d2b1ka\_ d5dvba1 d2b5xa1 d2v2ga\_ d1st9a\_ d3tb2a\_  
d411ra\_ d4fh8a1 d1e2ya\_ d1knga\_ d2h30a\_ d1i5ga\_ d2z9sa\_ d2f8aa1  
d1tp9a1 d2b7ka\_ d1nm3a2 d3hvva\_ d2wfca1 d4kcea\_ d1xvwa1 d4gqca1  
d3qpma\_ d4k1fa\_ d1zzoa1 d1gp1a\_ d1prxa\_ d3i2ka1 d1lnsa3 d1e88a1  
d116ja5 d116ja4 d1eaka4 d1eaka3 d116ja3 d1h8pa2 d1h8pa1 d1jgta2  
d1ofda3 d1ea0a3 d1ecfa2 d1q15a2 d1ct9a2 d1te5a\_ d1ys1x\_ d4hs9a\_  
d1ispa\_ d1ku0a\_ d3qmma\_ d1dgsa2 d1fvia1 d1ckma1 d1x9na2 d4l3wa\_  
d111fa\_ d1gz7a\_ d1lukca\_ d1cr6a2 d2ftba\_ d1pmpa\_ d2rcqa1 d4lkpa\_  
d1sa8a\_ d1vyfa\_ d1lpja\_ d3vg7a1 d4azqa1 d1o8va\_ d5bvqa\_ d1p6pa\_  
d2qo4a\_ d1opba\_ d1yiva1 d1o1va\_ d4bvma1 d4tkba\_ d4i3ba\_ d1bwya\_  
d1ftpa\_ d1ggla\_ d4gkca\_ d1cbia\_ d3p6da1 d1kqwa\_ d2a0aa1 d3zxha\_

d1cgl\_a\_ d1rm8a\_ d1leaka2 d1hy7a\_ d2jsda\_ d1cxva\_ d1hv5a\_ d1i76a\_  
d3p0ya1 d1lgra1 d1lgra2 d1n8yc2 d1m6ba2 d1m6ba1 d2tbvc\_ d1c8nc\_  
d1x36a\_ d1smvc\_ d1ng0c\_ d4sbvc\_ d1f2nc\_ d1cixa\_ d1y29a\_ d1v7fa\_  
d2jtba\_ d1d1ha\_ d1g9pa\_ d1llupa\_ d1qk7a\_ d1mb6a\_ d2a2va\_ d1niya\_  
d1i25a\_ d1hvwa\_ d2mpqa\_ d1ie6a\_ d1kqha\_ d1la4a\_ d2mxa01 d1koza\_  
d1qk6a\_ d1emxa\_ d1lqra\_ d1c6wa\_ d1rmka\_ d1ixta\_ d1eyoa\_ d1cnaa\_  
d1glpa\_ d1f3ka\_ d1fyga\_ d1rypd\_ d1lrua\_ d1rypc\_ d3unfk\_ d1rypa\_  
d1j2pa\_ d1lru1\_ d1j2qh\_ d3unfh\_ d1m4ya\_ d1rypb\_ d1lru1\_ d1lru1\_  
d1lru2\_ d1q5rh\_ d1rypg\_ d1g3ka\_ d1q5qa\_ d1e94a\_ d1lru1\_ d1ryph\_  
d3ty6a\_ d1lru1\_ d1lru1\_ d1rype\_ d1lru1\_ d1lru1\_ d3mi01\_ d1rypf\_  
d1lru1\_ d2z3ba\_ d1lru1\_ d3mka2\_ d1lru1\_ d1ny721\_ d1ny722\_ d1a6ca2  
d1a6ca1 d1pg122 d1pg121 d1pg111 d1ny711 d1mqta\_ d1d4m3\_ d1fmd3\_  
d2mev1\_ glaym.1 d1ev13\_ d4q4w1\_ d1r1a3\_ d2x5ia\_ d1rhi1\_ glr1a.1  
g1d4m.1 g1rhi.1 d1b35b\_ d1loopa\_ d1tme1\_ d4iv1a\_ glpvc.1 glfpn.1  
d1fpn1\_ d4gb31\_ d1d4m1\_ d1fmd1\_ d1ev11\_ d2wzr3\_ glcov.1 d1qqp3\_  
g1fmd.1 d2x5ic\_ d1rhi3\_ g1oop.1 d1hxs1\_ glhxs.1 d1fpn3\_ d1bev1\_  
g2mev.1 d1eah3\_ d1aym1\_ d1pvc3\_ d1qqp1\_ d1zba3\_ d1h8ta\_ d3vbhc\_  
g1b35.1 glbev.1 g1ev1.1 d1bev3\_ g1tmf.1 d1tmf1\_ d1b35a\_ d2mev3\_  
g1eah.1 g1h8t.1 d1eah1\_ d4q4w3\_ d1r1a1\_ d1aym3\_ d1pvc1\_ d1zba1\_  
d1h8tc\_ d1loopc\_ d1tme3\_ g1qqp.1 d4iv1c\_ g1tme.1 d3ubub\_ d1legia\_  
d1v7pa\_ d1tdqb\_ d3ubua\_ d1c3ab\_ d1h8ua\_ d3bx4b\_ d1t8ca1 d1sb2a1  
d1qdda\_ d2ziba1 d3cada\_ d1byfa\_ d1j34b\_ d1jwia\_ d1jzna\_ d1c3aa\_  
d1oz7b\_ d1wmza\_ d3bdwb\_ d1hq8a\_ d1fifa1 d1dv8a\_ d3hupa\_ d1wk1a1  
d1umra\_ d2afpa\_ d3bx4a\_ d1gz2a\_ d1sl6a\_ d1v7pb\_ d3g8ka\_ d1ixxa\_  
d1j34a\_ d1jwib\_ d1g1sa1 d1y17a1 d1ja3a\_ d1fvub\_ d3bdwa\_ d1sb2b1  
d1fvua\_ d1umrc\_ d1oz7a\_ d4m17a\_ d3cfwa1 d1ypqa1 d1glta1 d3fd4a\_  
d3l9jc\_ d4dn8a1 d1v4lb\_ d1rd11\_ d2msba\_ d1eixa\_ d3exra\_ d2ffca1  
d2fdsa1 d3n3ma1 d2czda\_ d1q6oa\_ d2yyua\_ d1vqta1 d1dbta\_ d3ldva1  
d2flia1 d1rpxa\_ d1tqja\_ d1tqxa\_ d4lt9a1 d3tc7a1 d3hoja\_ d1i4na\_  
d3vnda\_ d3n18a1 d1geqa\_ d3nav1a1 d1v5xa\_ d4a2ra1 d3tc6a1 d1ujpa\_  
d4ijba\_ d1xcfa\_ d1rd5a\_ d1qopa\_ d3b5va\_ d2r80b\_ d1cqxa1 d1cg5a\_  
d1gcvb\_ d3boma\_ d2h8fb\_ d2raoa\_ d3bj1a\_ d4hrrb\_ d2r50a\_ d3d1kb\_  
d2aa1b1 d3zhwa\_ d3hf4b\_ d3gdja\_ d1jebb\_ d3bj1b\_ d1x9fb\_ d1wmub\_  
d1gcva\_ d3bcqb\_ d3d4xb\_ d1gvha1 d2dc3a\_ d3hf4a\_ d4yu3a\_ d3k8ba\_  
d1qpwb\_ d2r80a\_ d3bcqa\_ d1v4wa\_ d3wtgb\_ d1j17a\_ d4esaa\_ d1a9we\_  
d3d1ab\_ d1fsla\_ d4h21a\_ d1v4wb\_ d1mwca\_ d1vhba\_ d1jeba\_ d1spgb\_  
d1h97a\_ d1q1fa\_ d1tu9a1 d3d1aa\_ d1hdsb\_ d3hyub\_ d2zffb\_ d3fs4a\_  
d1oj6a\_ d1shrb\_ d4h21b\_ d4yu3b\_ d1spga\_ d3hrwa\_ d3qqra\_ d3at5a\_  
d4wchd\_ d3hyua\_ d1cg5b\_ d1uc3a\_ d1hbra\_ d2raob\_ d1outb\_ d4esab\_  
d3gdjb\_ d3qqqa\_ d1x9fc\_ d3vrfa\_ d1litha\_ d3mkba\_ d3d4xa\_ d3mjpa\_  
d1j16a\_ d3fh9a\_ d1outa\_ d2dc3b\_ d1lit2a\_ d3eoka\_ d3g46a\_ d1qpwa\_  
d3vrfb\_ d1ch4a\_ d1x9fd\_ d1hdsa\_ d2zfb\_ d3mkbb\_ d1or4a\_ d3wtga\_  
d1a4fa\_ d3fh9b\_ d3bomb\_ d3cy5a\_ d3at5b\_ d1x9fa\_ d2oifa\_ d4lmbx\_  
d1cpcb\_ d3v57a\_ d1kn1a\_ d1cpc\_ d4f0ta\_ d2vjha\_ d4po5b\_ d1eyxa\_

d1alla\_ d4f0tb\_ d1b33b\_ d1b8db\_ d4h0mb\_ d1b33a\_ d2vjhb\_ d4lm6b\_  
d2vmlb\_ d1allb\_ d2vjta\_ d3dbja\_ d2vmla\_ d2vjtb\_ d4f0ub\_ d1f99b\_  
d4rmpa1 d1liaa\_ d1eyxb\_ d2uulb\_ d4lmsb\_ d4f0ua\_ d2bv8a\_ d1f99a\_  
d2bv8b\_ d2c71b\_ d3dbjb\_ d4rmpb1 d1b8da\_ d4h0ma\_ d3v57b\_ d1kn1b\_  
d1liab\_ d2uula\_ d2j96a\_ g1gxs.1 d2xqfa\_ d1ea5a\_ d1f6wa\_ d1dx4a\_  
d1qe3a\_ d1k4ya\_ d4qwwa\_ d2ha2a\_ d1rpma\_ d2shpa1 d1yfoa\_ d1l8ka\_  
d2ooqa1 d1g4us2 d1p15a\_ d1lara2 d1lara1 d1wcha\_ d2fh7a2 d2fh7a1  
d1jmx4 d1jmx3 d1pbya4 d1pv8a\_ d1w5qa\_ d2c1ha\_ d1ohla\_ d1f74a\_  
d3l21a\_ d2e1da\_ d1to3a1 d1w3ia\_ d1sfla\_ d1n7ka\_ d1vcva1 d4imea\_  
d1wa3a\_ d2ocza1 d1f2ja\_ d3m16a\_ d2yxga\_ d1ub3a\_ d3a5fa\_ d1fbaa\_  
d1l6wa\_ d1xfba1 d1wx0a1 d1vpxa1 d1mxsa\_ d2a4aa1 d1xkya1 d3cq0a1  
d3s1xa\_ d1f05a\_ d1fdja\_ d3cpra1 d4d2ja\_ d4mh8a\_ d1mu2a2 d4i7ga1  
d3rp2a\_ g1lucy.1 d1fuja\_ d2zchp\_ d3w94a\_ d1si5h\_ d1lo6a\_ g2pka.1  
d1cgha\_ d1kigh\_ d1a5ia\_ d3s9ba\_ d1hj8a\_ d1ao5a\_ d2anya\_ d1q3xa1  
d1gvza\_ d1azza\_ d4gsoa\_ d2f91a1 d1iaua\_ d1gdna\_ d1eufa\_ g1fiw.1  
d1eq9a\_ d4nfea\_ d2rdla\_ d1spja\_ d1elva1 d1a7sa\_ d1ekbb\_ d1pfxc\_  
d1yc0a\_ d2aiqa\_ g1fiz.1 d1fi8a\_ d4k60a\_ d4dgja\_ d1mzaa\_ d1lop0a\_  
d3tjva\_ d1pytd\_ d1sgfg\_ g1gg6.1 d2eeka\_ g1rtf.1 d1a0ja\_ d3g01a\_  
d1pytc\_ d4e7na\_ d1ddja\_ d1z8ga1 d2hlca\_ d1npma\_ d1brup\_ g1jou.1  
d1sgfa\_ d1autc\_ g2hnt.1 g1kdq.1 d3s69a\_ d4crga\_ d1fxya\_ d1bqya\_  
d1ra6a\_ d1muka\_ d3gsza\_ d1khva\_ d1te9a\_ d2xwha\_ d3uqsa\_ d3hkwa\_  
d3n6ma\_ d2cjqa\_ d2xyma\_ d1teba\_ d1te8a\_ d1u09a1 d4wfxa\_ d3tyqa\_  
d2pgga1 d1dzka\_ d4tlja\_ d2a2ua\_ d4wfva\_ d3t1da\_ d4iaxa\_ d3zq3a\_  
d2nnda\_ d1i4ua\_ d1kxoa\_ d1bbpa\_ d1kt7a\_ d1exsa\_ d3s26a1 d1lf7a\_  
d4gh7a\_ d1z24a1 d1qabe\_ d1xkia\_ d1ew3a\_ d3bx7a\_ d4iawa1 d1n0sa\_  
d1gkab\_ d3kzaa\_ d2k23a\_ d2l9ca1 d2joza1 d1gm6a\_ d3kffa\_ d3saoa1  
d1e5pa\_ d1yupa1 d1iiua\_ d3lgia\_ d3i77a\_ d2z9ia2 d4nsva\_ d4jcna\_  
d1agja\_ d1os8a\_ d1hpga\_ d1p3ca\_ d1l1ja\_ d1qtfa\_ d1e69a\_ d3g60a4  
g1ii8.1 d1ewqa2 d1ji0a\_ d1qhla\_ d1v43a3 d2wmfa1 d1vpla\_ d1g2912  
d4a82a2 g1f2t.1 d2d62a1 d3tuic1 d2bbsa1 d3g60a3 d2ixea\_ d1g6ha\_  
d1sgwa1 d2qi9c\_ d3r1fa1 d3b60a1 d3d31a2 d2pzea1 g1xew.1 d1jj7a\_  
d1oxk2 d2onka1 d1w1wa\_ d1iwea\_ d1qf5a\_ d1vmaa2 d1nija1 d1np6a\_  
d2p67a1 d3ihla\_ d1okkd2 d1ls1a2 d1s1ma2 d1iona\_ d2v40a\_ d1dj3a\_  
d3hida\_ d2vo1a1 d2g0ta1 d1vcoa2 d1j8mf2 d1g3qa\_ d1xjca\_ d1p9ba\_  
d1qzxa3 d1ihua2 d1ihua1 d2qm8a\_ d1dj2a\_ d4ioja\_ d1yrba2 d1hyqa\_  
d3gqba2 d1skye3 d1xp8a1 d1tf7a2 d1tf7a1 d1ye8a1 d1skyb3 d2qe7d2  
d4blta\_ d4huta\_ d3l1daa2 d4hyya\_ d2i3ba1 d1cr1a\_ d3j9tb2 d3ntua2  
d1vdza1 d2z43a\_ d1e9ra\_ d1nlfa\_ d3ziaa2 d1n0wa\_ d3ziad2 d3j9ta2  
d1pzna2 d3gqbb2 d2i49a\_ d1nnfa\_ d1xvxa\_ d1ursa\_ d1h3da1 d1iuda\_  
d4m1va1 d1twya\_ d3e13x\_ d2nxoa1 d4pfua\_ d3ttma\_ d1elja\_ d2qmw1  
d1us5a\_ d1y3na1 d1jeta\_ d1uqwa\_ d4f19a1 d2esna2 d3thia\_ d3fasa1  
d2uyeb\_ d2xwva1 d1r9la\_ d2fyia1 d1pb7a\_ d2ozza1 d1sw5a\_ d1nh8a1  
d1vr5a1 d2g29a\_ d1xs5a\_ d3lswa\_ d2z23a\_ d3w9va\_ d3tcha\_ d1q35a\_  
d1z7me1 d3q27a\_ d1p99a\_ d1ve4a1 d2i6ea1 d4mcoa1 d4n8ya\_ d1eu8a\_

d1zbma1 d1hsla\_ d1ixca2 d1j1na\_ d1xvya\_ d1y9ua\_ d2z22a1 d1xocal  
d4oera\_ d1wdna\_ d5f1qa1 d1xt8a1 d4gwoa\_ d4igta1 d1pc3a\_ d4mmpa1  
d1o63a\_ d2cz1a1 d2onsa2 d4mija1 d1eh3a\_ d3skpa\_ d1dtza1 d1ieja\_  
d1jnfa2 d1ce2a1 d1jnfa1 d1b1xa2 d1b1xa1 d1jw1a1 d1jw1a2 d1ryoa\_  
d1h76a1 d1h76a2 d1etha2 d1w52x1 d2pp1a1 d1hpla2 d2oxea1 d1bu8a2  
d1rp1a2 d1c4oa1 d2p6ra3 d2p6ra4 d1oywa2 d1oywa3 d1wrba1 d1w36b2  
d1w36b1 d1c4oa2 d3bora\_ d1t6na\_ d2eyqa5 d2eyqa3 d2eyqa2 d2zu6a2  
d1veca\_ d1uaaa1 d1w36d1 d2g9na1 d1z3ix2 d2rb4a\_ d1hv8a1 d1hv8a2  
d1t5ia\_ d1w36c2 d2j0sa2 d2j0sa1 d1fuka\_ d3hjha1 d1z5za1 d1qdea\_  
d1z63a1 d1s2ma2 d1s2ma1 d1wp9a1 d1wp9a2 d1gm5a3 d1gm5a4 d3dina4  
d3dina3 d1q0ua\_ d1w36c1 d1z3ix1 d1nкта3 d1uaaa2 d1w36d2 g1qhh.1  
d2fwra2 d2fwra1 d2v8ta\_ d3q3ma\_ d1za0a1 d1mxra\_ d2inca\_ d1jk0a\_  
d2incb\_ d1mhyb\_ d3hf1b\_ d1mtyb\_ d1r2fa\_ d2uw1a\_ d1mhyd\_ d3n37a\_  
d1afra\_ d1loquc\_ d1syya\_ d1mtyd\_ d2o1za\_ d1uzra\_ d1smsa\_ d2fkza\_  
d1zujal d1s3qa1 d2fjca1 d1z6om1 d1veia\_ d4dyya\_ d1jiga\_ d3gvya\_  
d2pyba\_ d4cy9a1 d3bvfa1 d1r03a\_ d2cf7a\_ d1nf4a\_ d1zs3a1 d4iwka\_  
d3ka8a\_ d3np0x\_ d1n1qa\_ d1lb3a\_ d4e6ka\_ d1z6oa1 d2fzfa1 d4dyua\_  
d3ge4a\_ d1jgca\_ d4am4a\_ d2z6ma\_ d1ji5a\_ d1vlga\_ d1krqa\_ d3qz3a\_  
d1o9ra\_ d2ffxj\_ d1euma\_ d1yv1a1 d2v2pa\_ d1j30a\_ d4di0a\_ d1dpsa\_  
d1oewa\_ d2qzxa\_ d2asia\_ d1psoe\_ d1miqa\_ d1smra\_ d2h6ta\_ d1pfza\_  
d1lizda\_ d3hd8a\_ d1j71a\_ d1dpja\_ d4aa9a\_ d1t6ex\_ g1b5f.1 g1lya.1  
g1htr.1 d1qdma2 d1bxoa\_ d1wkra\_ d1tzsa\_ d1libqa\_ d2qzwa\_ d1ex4a2  
d1bdqa\_ d3ggta\_ d3ixoa\_ d1mrxa\_ d2haha\_ d1tw7a\_ d4njsa\_ d1sgua\_  
d2p3da\_ d1nsoa\_ d3d3ta\_ d2rkfa\_ d1c6ya\_ d2rspa\_ d3ogpa\_ d3ekwa\_  
d2o4na\_ d2j9ja\_ d1baia\_ d3ggua\_ d3lzua\_ d4npua\_ d4j55a\_ d2r8na\_  
d2fxda\_ d2p3ca\_ d4dqea\_ d3ttpa\_ d3t3ca\_ d2p3aa\_ d2hc0a\_ d2fdda\_  
d3mwsa\_ d1um8a\_ d1ixza\_ d1qvra2 d1qvra3 d1qzma\_ d1sxjc2 d1jr3d2  
d2p65a\_ d1l8qa2 d1g8pa\_ d3hu3a3 d1sxjd2 d1njfa\_ d1in4a2 d1sxja2  
d1tuea1 d2ce7a2 d1w5sa2 d1sxjb2 d1d2na\_ d1ny5a2 d1ofha\_ d2gnoa2  
d2a5yb3 d1fnna2 d1u0ja1 d1lv7a\_ d1iqpa2 d2fnaa2 d1ixsb2 d4gita\_  
d1sxje2 d1k8rb\_ d1wgra1 d1ef5a\_ d1wfyal d1e8ya3 d1wgya1 d1lfda\_  
d2cs4a1 d1wxma1 d2byea1 d3kh0a1 d2byfa1 d1wxaa1 d1e7ua3 d1h4ra3  
d4y18a1 d2a16a3 d1wgda1 d1wgga1 d4q5eb\_ d1wjna1 d1se9a\_ d3n3kb\_  
d1wz0a1 d1we6a1 d2m0xa\_ d2gbka\_ d3rt3b1 d1wh3a1 d1sifa\_ d2ekek2  
d4ii2b1 d4hk2a1 d1c3ta\_ d1m94a\_ d1wgha1 d1ttna1 d1j8ca\_ d1wx8a1  
d3v6cb1 d2ma9b\_ d4i61b1 d1bt0a\_ d2jvca1 d1iyfa\_ d2k1fa\_ d1wxva1  
d1wf9a1 d1t0ya\_ d2io0b2 d1x1ma1 d2gbma\_ d1zw7a1 d2m17a\_ d1ud7a\_  
d1we7a1 d2lwpal d2gbjal d1wjua1 d1v6ea1 d1v86a1 d4eewa\_ d1wiaa1  
d4icva\_ d4gu2a\_ d1wx7a1 d1wy8a1 d4hjka1 d2faza1 d1v5oa1 d3ruib\_  
d3waob\_ d2r2qa1 d3m95a\_ d3wana\_ d2a13a1 d2cr5a1 d1wj4a1 d1s3sg\_  
d1ps9a2 d1o94a2 d1cjca1 d1g66a\_ d1qoza\_ d5ajha1 d3h33a\_ d1rwja\_  
d19hca\_ d1os6a\_ d3bxua\_ d3h4na\_ d1i77a\_ d3caoa\_ d1j0pa\_ d2ctha\_  
d1duwa\_ d1ofwa\_ d2e84a\_ d1gyoa\_ d3h34a\_ d1wioa4 d1ccza2 d1vcaa1  
d1dr9a2 d2d9qb1 d2nxyb2 d2dara2 d2dara1 d1wyha2 d2dloa2 d1rutx4



d1rutx3 d2cuqa2 d1x41a2 d1x41a1 d1x3ha2 d1x3ha1 d2d8za1 d1x61a2  
d1x6aa1 d1x6aa2 d2cora2 d2cora1 d1v6ga1 d1v6ga2 d2d8za2 d1x64a1  
d1x64a2 d1b8ta1 d2co8a1 d1x63a2 d2dj7a2 d2dj7a1 d2cu8a2 d2cu8a1  
d1g47a2 d1j2oa1 d1wyha1 d2dloa1 d1wiga1 d1wiga2 d2cupa2 d2cupa3  
d1x68a1 d2d8ya2 d2d8ya1 d1m3va2 d1x62a1 d1x68a2 d1x61a1 d1b8ta3  
d1b8ta2 d2d8xa2 d2d8xa1 d1x4ka1 d1x4ka2 d2cuqa1 d1m3va1 d2co8a2  
d1j2oa2 d1x63a1 d2cura1 d2cura2 d1x62a2 d1svpa\_ d1mbma\_ d3su6a1  
d1cula1 d4agka\_ d1vcpa\_ d1q31a\_ g1n11.1 d3e90b\_ d1ep5a\_ d3u1jb\_  
d3ia2a\_ d1a88a\_ d4dgqa1 d1hkha\_ d1zoia\_ d2k4ua\_ d1hp2a\_ d2lu9a\_  
d1baha\_ d2meoa1 d1wm7a\_ d1hlya\_ d1n8ma\_ d1jlza\_ d1wpda\_ d1c55a\_  
d1pvza\_ d1wt7a\_ d1wz5a\_ d1m2sa\_ d1pjva\_ d1c49a\_ d1qkya\_ d2ktca1  
d1wmta\_ d1du9a\_ d1j5ja\_ d1rlga\_ d1t0za\_ d2i61a\_ d1t1ta\_ d1sn4a\_  
d1kv0a\_ d21kba\_ d1npia\_ d1wwna\_ d1pe4a\_ d2kbka\_ d21i7a\_ d1djta\_  
d2kbha\_ d1dq7a\_ d1sega\_ d1omya\_ d1zywa1 d1jzaa\_ d2jccqa\_ d1bn1a\_  
d1dy2a\_ d1t61c1 d1iyjb4 d1iyjb5 d1iyjb3 d1o7ia\_ d4ipca1 d1x3ea\_  
d4apva\_ d1jb7a1 d1jb7a2 d1jb7a3 d3kdfa\_ d1ue1b\_ d1wjja1 d3eiva\_  
d1xjva2 d1xjva1 d2ccza2 d1se8a\_ d1l1oc\_ d1jb7b\_ d1qvca\_ d3ulla\_  
d1qzga\_ d1miua4 d1miua5 d1miua3 d3g48a1 d1gd7a\_ d1jjcb3 d1pyba\_  
d1y14b1 d2nn6i1 d1i941\_ d2zjra2 d1smxa\_ d2gamc2 d1hh2p1 d2r7da1  
d1rl2a2 d1wfaq1 d3bzka4 d1x6oa2 d3a0ja\_ d2j01d2 d2ja9a1 d4q15a\_  
d1hr0w\_ d1luza\_ d2n3sa\_ d2vnud1 d1h95a\_ d1go3e1 d2nn6h1 d2mo1a\_  
d1iz6a2 d1jjga\_ d1e3pa2 d2ix0a3 d2ix0a2 d2lxja\_ d1ueba3 d1ueba2  
d2z0sa1 d1u01a1 d2ix0a1 d2eifa2 d2je6i1 d3i2za1 d2c35b1 d2ahob2  
d1t9ha1 d3i4oa\_ d2qall1 d1jt8a\_ d2nn6g1 d1g6pa\_ d3cama\_ d1i94q\_  
d1c9oa\_ d1d7qa\_ d2ba0a1 d2vnud2 d2vnud3 d1khia2 d2qalq1 d1wi5a1  
d1xtda2 d1ny4a\_ d1prtc2 d1pfsa\_ d2a1ka\_ d1ohea1 d1ohea2 d2f4da\_  
d1rxda\_ d2hxpa\_ d1xria\_ d1fpza\_ d3ezza\_ d4y2ea\_ d1i9sa\_ d3azya\_  
d3wvja\_ d1upsa1 d1ajoa\_ d2hyka\_ d1ajka\_ d2vy0a\_ d1o4ya\_ d3o5sa\_  
d3d6ea\_ d3atga\_ d1dypa\_ d1lumza\_ d3i4ia\_ d1tdha3 d1q3ba3 d1ee8a3  
d1k82a3 g1qmo.1 g1len.1 d3zyra\_ d1n47a\_ g21tn.1 d1avba\_ d3usua\_  
d1dhkb\_ d1f9ka\_ d1ukga\_ d1g8wa\_ d1g9fa\_ d1wbfa\_ d3wcsa\_ d1g7ya\_  
g1loe.1 d1mvqa\_ d1hq1a\_ d1v6ia\_ d1dbna\_ d1qnwa\_ d1fx5a\_ d418qa\_  
d1ioaa\_ d3n35a\_ d1eysc\_ d2h0ba\_ d2erfa\_ d1h30a2 d3mw4a1 d1pz7a\_  
d2r1ba\_ d3v64a1 d1d2sa\_ d3bopa1 d3mw3a1 d1okqa1 d1okqa2 d1dszb\_  
d1a6ya\_ d3cbba\_ d1ynwa1 d1r4ia\_ d1hcqa\_ d2hana\_ d2hanb\_ d2enval  
d1kb4b\_ d2n11b\_ d1lola\_ d1cita\_ d1adqa1 d1fnga1 d1uvqb1 d1zs8a1  
d2vola1 d2vola2 d1mfb12 d2jelh2 d1uwe12 d3qq4b1 d1kjvb\_ d1k5na1  
d1osph2 d4odh12 d1ow0a1 d1ow0a2 d1bfob2 d3l9ra2 d3jttth1 d2fath2  
d4elkb2 d1fn4b2 d2xfxb\_ d1pg7x2 d1cqka\_ d4k71b2 d1l1k2a1 d1eapb2  
d41fhg2 d1i4fa1 d2nw2a2 d1kfah2 d1mhca1 d1h3ua1 d1wejh2 d1h0db2  
d1a5fh2 d1kcvh2 d1mjuh2 d1qqda1 d1kcrh2 d1k8ia1 d3huja2 d2nnab1  
d1nfd2 d3mffb2 d1s9va1 d1l1k3h2 d1q0x12 d1fv1b1 d1neza1 d4rfeb2  
d1r3ha1 d1a6tb2 d1kjva1 d1pz5b2 d1onqa1 d2bc4a2 d1de4a1 d1k8da1  
d1tcra2 d1dn0b2 d1nfd2 d2xwtb2 d1bfoa2 d1mexh2 d1iakb1 d1ypzf2

d4f7ea2 d1q72l2 d2fbjh2 d1fe8h2 d1clzh2 d1fnqb1 d1uvqa1 d1vgka1  
d1c16a1 d4j12a2 d4x99b2 d1igtb3 d1je6a1 d1q72h2 d1nldh2 d1teth2  
d2hmic2 d1i1ca2 d1i1ca1 d1k8ib1 d1q0yh2 d1kfa12 d3frua1 d1pg7w2  
d1u58a1 d1igyb4 d1igyb3 d1hyrc1 d1klub1 d1deeb2 d1c12b2 d2bc4b2  
d1kcv12 d3wn5b1 d11k2b\_ d11k3l2 d1mju12 d1sm3h2 d1q0xh2 d1zvsa1  
d1ydpal d1u8ib2 d1ypze2 d1kcu2 d1op9a\_ d1y0la1 d1letzb1 d1legj11  
d2gsib1 d1nj9a1 d4jfh1 d1aqk11 d1t2ja\_ d1lo4h1 d1zvya1 d3v4v11  
d4enec1 d1kxtb\_ d5e8ea1 d2pxya\_ d4weud\_ d1xiwc\_ d2esvd1 d1qznh\_  
d1ogae1 d1f4xh1 d4n1hb\_ d3ezjb1 d3mlw11 d1kfah1 d1etza1 d1b4jh1  
d3cfic\_ d4w68a\_ d2arja1 d1ek3a\_ d2ok011 d1vera\_ d1uwgh1 d1blnb1  
d1fpth1 d1rzga1 d2giya1 d4m3kb1 d1nc2a1 d2nyyd1 d1ncna\_ d1fbih1  
d5dxwa\_ d4fqqa1 d1dqdh1 d1jfq11 d1kelh1 d1faih1 d1frgl1 d1figl1  
d4m6n11 d1fo0a\_ d4hxb11 d3b5ga\_ d3quyd1 d2h9gb1 d1i8kb\_ d2dd8h1  
d2ck0h1 d1eaja\_ d4w6wb1 d2a6ib3 d1t66d1 d2e27h\_ d1ob1b1 d1f11b1  
d2v7na1 d1ad0a1 d2xt1b1 d1pskh1 d4i13b1 d2op411 d1a0q11 d1uwel1  
d1za3a1 d1ncb11 d4uu9a\_ d1bm3h1 d1cloh1 d1nqba2 d1cf8h1 d4y5va\_  
d1mhph1 d5anma1 d4cdgc1 d4ldeb\_ d1y0lb1 d2pcpb1 d1z3gl1 d1dfb11  
d1fh5h1 d3g5xa1 d1tzib1 d4dn3l1 d3zhka1 d2b1hh1 d2uylal d1f3dh1  
d1nj9b1 d2agjh1 d2h1pl1 d1q72h1 d8fabb1 d1ndmb1 d1rjca1 d4u6hb1  
d3upca\_ d2fbj11 d1osph1 d1tvda\_ d2cjev\_ d4fhbd1 d1bd2d1 d1rz7h1  
d3nn8a\_ d1blna1 d1knoa1 d1nfda1 d2bmkb1 d1dq11\_ d1igyb1 d1igf11  
d12e8h1 d3utza1 d1nc2b1 d1rihh1 d4mwfb1 d4jvpa1 d1mieh1 d1rhfa1  
d1fgn11 d1sbsh1 d1lp9e1 d1dn0a1 d4lqf11 d1iaih1 d1kgcd1 d1mh5b1  
d1gpol1 d2g60h3 d1f8t11 d2jixd1 d4grwh\_ d1fo0b\_ d1bfob1 d1axsa1  
d1u9ka\_ d1nmbh\_ d1h8na1 d1h8na2 d1jguh1 d4eura1 d3sdy11 d35c8h1  
d1w72l1 d1mvub\_ d1i9rh1 d1ob1a1 d4wenb\_ d1yeeh1 d3ietc1 d1f58h1  
d1ad0b1 d1mqk1\_ d1nbvh1 d4b50a\_ d3r8bb\_ d1baf11 d1mamh1 d4rgne1  
d2gsgb\_ d35c8l1 d1bafh1 d1ai1h1 d2pcpa1 d2fath1 d2x1pa\_ d1orsb1  
d1ibgl1 d1shma\_ d1a2yb\_ d1u0qa\_ d2coqa\_ d1hilb1 d1qfwi\_ d1jv5b\_  
d1fn4b1 d5e0qa\_ d1nsnh1 d1plgl1 d4ocx11 d1kb5h1 d1rzhf1 d1pg7x1  
d2fx7h1 d2oi9c\_ d1l7i11 d3eyva1 d1d5i11 d4ffyl\_ d1tet11 d1a6wh\_  
d1ac6a\_ d3dvfa\_ d1nfde1 d1mimh1 d1ri8a1 d1jhlh\_ d3dura\_ d1fskb1  
d1f97a1 d3so3b1 d2ak4d1 d1lp9f1 d4z7wf1 d1l7th1 d4y5ya\_ d4x7ec1  
d1emth1 d1ikf11 d1nlbh1 d4utal1 d1bjma1 d1eapb1 d1u6ah1 d2dtgd1  
d1kj2b\_ d1xeda1 d1cleh1 d1fgvh\_ d2bnub1 d2fb4h1 d2dtgb1 d1ktrh\_  
d1jpth1 d1qkz11 d4hepg\_ d2atpb1 d1flrh1 d2hrpl1 d1mvfa\_ d1iaim1  
d3k80a1 d2jb5h1 d3zkxc\_ d4grwe\_ d1it9h1 d1rhhb1 d3w9ec\_ d1e4wh1  
d1sy6h1 d2j6eh1 d3qxta\_ d1jglh1 d1p7ka1 d1tzhb1 d4n8pa1 d1gaf11  
d2jelh1 d1wioa2 d4i0cc1 d1cicb1 d1lmka2 d1lmka1 d1iqwh1 d1orqb1  
d1ejoh1 d1jnlh1 d4zg1a\_ d43c9b\_ d1ggbl1 d1wejh1 d3q6fa1 d1f3dj1  
d3c6la1 d1bqlh1 d3p9wb\_ d1a3r11 d1h0db1 d2uzil\_ d1eo8l1 d1qfwl\_  
d1n7ml1 d1igja1 d1c5ch1 d2a9mh\_ d1rmfh1 d1fj1b1 d4heme\_ d1ccza1  
d1a5fh1 d1ogad1 d1dlfh\_ d1qa9b\_ d1vge11 d3qskb\_ d1sjxa\_ d4ozfg1  
d1sq2n\_ d1qd0a\_ d1kcvh1 d1c5db1 d3qcull d8faba1 d3bn9d1 d1mjuh1

d4y8dc\_ d7fabh1 d3dvgb1 d1lo0l1 d1a6tb1 dlgigh1 dlkcrh1 d2hwz11  
d1yjdc1 d3clfl1 d4krna\_ d1dl7l\_ d1e6ol1 dlmexh1 d3r0ma\_ d4kkna\_  
d1fns11 d1oaqh\_ d1rzia1 d1lucbh1 d1ncwl1 d4b41a\_ d1nfdfl1 d2mpah1  
d2d7t11 d4grwf\_ d4b5ea\_ d1lk3h1 d3u79a\_ d4u3xa\_ d1ghfl1 d1bvkb\_  
d1mcww1 d1b88a\_ d1jrhh1 d32c2b1 d4wemb\_ d1dsfh\_ d1lop3h1 d1ce111  
d1iqda1 d1qoka1 d1qoka2 d1qfuh1 d2crya1 d1ay1h1 d1oaql\_ d3ab0b\_  
d1rur11 d1t4kb1 d1bz7b1 d1n0xh1 d1for11 d1lucb11 d4w6yb\_ d43c9a\_  
d2aabl1 d1tzia1 d4n1ca\_ d1k6qh1 d3g9ab\_ d4tvsa1 d1ligmh\_ d1pz5b1  
d3dx9a1 d3wxwh\_ d1nakh1 d1kcull1 d3eaka\_ d4qlra1 d1cr9l1 d1d9ka\_  
d1f4x11 d1deea1 d2i27n2 d1c12a1 d2orb11 d1j8hd1 d1mcph1 d1c5da1  
d1kenh1 d1bd2e1 d1h5ba\_ d4x7fc1 d3upaa\_ d1t3fa1 d1indh1 d2dtgc1  
d4hc111 d1zv5a1 d4wgvb\_ d1uwgl1 d4f37k1 d1aqkh1 d1vesa\_ d3zkqd\_  
d1fpt11 d1lo4l1 d1knob1 d3rrqa\_ d4orz\_ d1mlbb1 d4hgkc1 d1dqdl1  
d1bogb1 d4ozhe1 d1dr9a1 d1i7za1 d1dn0b1 d1kell1 d1rzi11 d1ypzf1  
d1wtla\_ d1hkfa\_ d1fail1 d1figh1 d2vyre\_ d1sjva\_ d1lohqa\_ d1bfoa1  
d1pkqb1 d1mjul1 d1b4j11 d1nsl1 d2arjb1 d1p4bh\_ d4aj0a\_ d3nn8b\_  
d2rcja1 d1f2xk\_ d4v1dd\_ d1adqh1 d2eksa\_ d4k3ga\_ d1jfqh1 d1luweh1  
d1frgh1 d4gftb\_ d1uz8b1 d4n1ea\_ d1bm311 d1clol1 d3mcka1 d2vq1a1  
d1ae6h1 d4aq1b1 d1uj3b1 d1nbqa1 d1fh5l1 d2ck0l1 d2ywza\_ d1q72l1  
d4nxbx\_ d1hila1 d4hzlb1 d2j88l1 d1zmya1 d1cd0a\_ d1a4ka1 d1pskl1  
d1a0qh1 d4krmb\_ d1ncbh1 d2fbjh1 d1j8he1 d1i3ua\_ d1cf8l1 d1fe8h1  
d2plya1 d1eeqa\_ d2x89a\_ d1ol0a\_ d2r0lh1 d1ub5a1 d1dfbh1 d3eyvb1  
d4jdvb1 d4p2cg\_ d2gsia1 d2agj11 d1u3ha1 d2h1ph1 d1rih11 d1fskc1  
d1boga1 d2a77l1 d1osp11 d1qfoa\_ d3dwta\_ d2fx7l1 d1rz7l1 d3stba1  
d1pkqa1 d1b6da1 d1dzba2 d1dzba1 d1kj2a\_ d4l1ha\_ d1rzb1 d1dq1h\_  
d12e8l1 d1miel1 d1jmaa\_ d1sbs11 d1fgnh1 d1f58l1 d1mqkh\_ d1ndgb1  
d3qeg11 d1iail1 d2aw2a1 d1tqbc1 d3fo2a1 d4dkaa\_ d1f8th1 d2g60l1  
d2ywya\_ d1uj3a1 d1yc7a\_ d3bd3a\_ d4w6xb1 d1nmb1\_ d1i8ka\_ d1rjlb1  
d1ypze1 d1p7kb1 d1kxqe\_ d1gpoh1 d2z4qa1 d1w72h1 d1i9rl1 d4qgya1  
d4xt1c\_ d2qqnh1 d1cica1 d3c08h1 d2cd0a\_ d2bdnh1 d1hnga1 d1mam11  
d1nldh1 d1cr9h1 d4lcih1 d3bkyh1 d3qg7l1 d1ai111 d1kxvc\_ d4iosd\_  
d1l7ih1 d2x1qa\_ d1ub6b1 d3k74b\_ d1ibgh1 d1teth1 d1igya1 d1hxma1  
d2x6ma\_ d2e7la\_ d5e03a\_ d1qfwm\_ d2r0kh1 d1igjb1 d1rurh1 d1plgh1  
d1mj8h1 d1yuhb1 d3fmg11 d1rzfl1 d1emt11 d1ad9b1 d1igtb1 d1nlb11  
d1d5ih1 d3k7ua\_ d4ffyh\_ d1bwwa\_ d3dvga1 d1a6ta1 d1fgvl\_ d4qxgl1  
d1mim11 d1jhl1\_ d2hffb1 d2hh0l1 d1qkzh1 d1l7t11 d1afvh1 d1iaii1  
d2cjuh\_ d1um5h1 d2ghwb2 d2ghwb1 d1kgce1 d2fgwh1 d1ikfh1 d1dvfd\_  
d2i24n1 d2xtjb\_ d1za3b1 d2yc1a\_ d2hh0h1 d2x1oa\_ d1bvka\_ d1rjla1  
d5e7ba1 d1igta1 d1il1b1 d2fb4l1 d1mvua\_ d1jpt11 d32c2a1 d1fvca\_  
d1iqdb1 d2hrph1 d2p4ab\_ d4qo1a\_ d1p2cb1 d1wt5c\_ d1t4ka1 d5c1mb\_  
d1it9l1 d1bz7a1 d1b2wh1 d1e4wl1 d1jnl11 d1yedb1 d1za6b1 d3u7aa\_  
d1igfh1 d3gnml1 d1orsa1 d1wejl1 d1a2ya\_ d1hxmb1 d1gafh1 d2j4wh1  
d1pz5a1 d1j05a\_ d1a3rh1 d4fq1l1 d1qfwh\_ d1eo8h1 d1n7mh1 d4s11a\_  
d1kegh1 d5da4a\_ d1iqwl1 d3whxb1 d1vgeh1 d1deeb1 d1c12b1 d1t2ql1

d1ad9a1 d3gsnb1 d3b2uc1 d1ggbh1 d1t3fb1 d1nakl1 d4ocmc\_ d1lila1  
d2v7hb3 d2esve1 d1mcoh1 d2qr0b1 d2q3aa\_ d1ct8a1 d1kcrl1 d2pxyb\_  
d2uzih\_ d5c3ld\_ d3durb\_ d1c5c11 d2ak4e1 d1d17h\_ d1xiwd\_ d1mlba1  
d1rmfl1 d1i7zb1 d1dlfl\_ d2xa3a\_ d5bq7b1 d1dqqb1 d3h4211 d1legjh1  
d1kcvl1 d1fe8l1 d2j6e11 d1f3rb2 d1lk311 d1sm3h1 d1q0xh1 d1ghfh1  
d7fabl1 d1igch1 d1l00h1 d4idla\_ d5c2b1\_ d1jrh11 d1l11a1 d3zhda1  
d4kfzc\_ d1b0wa\_ d1e6oh1 d1mexl1 d4krpb\_ d1fnsh1 d1ncwh1 d4hgma\_  
d4eigb1 d4rzca\_ d2mpal1 d4y5xa\_ d5en2b1 d3lrqa1 d4ej1c1 d1rhha1  
d1j05b\_ d1forh1 d1q9wb1 d2wzpd\_ d2aq2a1 d1h0da1 d3revb1 d2ij0c1  
d1tzh1 d4m7j11 d1k6q11 d3b9kc1 d1igml\_ d3qeua1 d1dsfl\_ d1celh1  
d1kcu1 d1zvha1 d1zvoa1 d1tqbb1 d1ay111 d2qscl1 d2cgrh1 d1n10h1  
d1ken11 d3eo0a1 d4n9ob1 d1n0xl1 d3k1kc\_ d2m9wa1 d3dfxa\_ d2aq2b1  
d1ck1a1 d1lenfa1 d1i4pa1 d1vloa1 d1et9a1 d1esfa1 d2g9hd1 d4ohja1  
d1klud1 d1bxta1 d1eu3a1 d1ty0a1 d1fnua1 d2cqva1 d1fhga\_ d2k1ma\_  
d2d12a1 d1biha3 d1biha1 d1biha4 d3qp3a1 d1g1ca\_ d1gxea\_ d1cvsc2  
d1cvsc1 d1xmwa2 d1m4ka2 d2otpa2 d1biha2 d1rhfa2 d2fcba2 d2fcba1  
d1gsma2 d1epfa1 d1epfa2 d2dava1 d1waaa\_ d1f97a2 d1x44a1 d1vcaa2  
d1fnla2 d1fnla1 d3b5ha2 d3h8na2 d3h8na1 d1jbja1 d1jbja2 d1pd6a\_  
d1f2qa2 d1f2qa1 d3cx2a\_ d1nbqa2 d3b5ha1 d1n26a1 d1xiwb\_ d1xaua\_  
d1fltx\_ d2ifga1 d1olla1 d1olla2 d1cs6a4 d1cs6a3 d1cs6a2 d1cs6a1  
d2gw5a2 d1sy6a1 d1xiwa\_ d1lucta2 d1lucta1 d1ry7b2 d1gl4b\_ d1qz1a3  
d1olza1 d2c9aa1 d1wwca\_

**Family-90 (d.32.1.3)**

**Positive dataset contains 11 protein sequences.**

d4ghga1 d1tfza1 d3isqa1 d3isqa2 d1sqia1 d1sqia2 d1sp9b2 d1t47a1  
d1t47a2 d1sp8a1 d1sp8a2

**Negative dataset contains 3985 protein sequences.**

d1m32a\_ d1libja\_ d1c7na\_ d1liuga\_ d4q75a\_ d2bkwa1 d1t3ia\_ d1n8pa\_  
d1qz9a\_ d1jff9a\_ d1leg5a\_ d1p3wa\_ d3kgwa\_ d1c11a\_ d2ctza1 d2rfva\_  
d1gc0a\_ d1cs1a\_ d1d2fa\_ d2ch1a1 d1qgna\_ d1pffa\_ d1elua\_ d1ax4a\_  
d2v1pa1 d2ez1a\_ d1u08a\_ d1lc5a\_ d2ay1a\_ d1bw0a\_ d3pd6a\_ d7aata\_  
d2csta\_ d1j32a\_ d1fg7a\_ d4wlha\_ d1o4sa\_ d1v2da\_ d1gdea\_ d1m6sa\_  
d1v72a1 d1svva\_ d1ajsa\_ d1wsta1 d2f8ja2 d1lk9a\_ d1vp4a1 d1xi9a1  
d2gb3a1 d1yaaa\_ d1xkla\_ d2wfla\_ d3i2ka1 d1lnsa3 d1mpxa2 d2cfba1  
d1o69a\_ d1bj4a\_ d3k28a\_ d2bwpa\_ d3lg0a\_ d2fnua\_ d3ou5a\_ d1z7da1  
d1b9ha\_ d1iaya\_ d4msoa\_ d1bs0a\_ d1s0aa\_ d1sffa\_ d3tqxa\_ d1mdoa\_  
d3qboa\_ d3pgya\_ d1bjna\_ d2dkja\_ d1ejia\_ d1vefa1 d4wxga\_ d3bs8a\_  
d3gbxa1 d1w23a\_ d1xova2 d2tbvc\_ d1c8nc\_ d1x36a\_ d1smvc\_ d1ng0c\_  
d4sbvc\_ d1lopa\_ d1f2nc\_ d1dzka\_ d4tlja\_ d2a2ua\_ d4wfva\_ d3t1da\_  
d4iaxa\_ d3zq3a\_ d2nnda\_ d1i4ua\_ d1kxoa\_ d1bbpa\_ d1kt7a\_ d1exsa\_  
d3s26a1 d1lf7a\_ d4gh7a\_ d1z24a1 d1qabe\_ d1xkia\_ d1ew3a\_ d3bx7a\_  
d4iawa1 d1n0sa\_ d1gkab\_ d3kzaa\_ d2k23a\_ d2l9ca1 d2joza1 d1gm6a\_  
d3kffa\_ d3saoa1 d1e5pa\_ d1yupa1 d1iiua\_ d1js9c\_ d1f15b\_ d1za7a\_  
d1laja\_ d1gyca3 d1hfua2 d1kbva1 d1kbva2 d1sdda1 d1sdda2 d1gyca1

d1gyca2 d1mzya1 d2bw4a1 d1aoza1 d1aoza3 d1aoza2 d1kyaa2 d1kyaa3  
d1mzya2 d4e9sa1 d1sddb1 d1sddb2 d1hfua1 d1hfua3 d1oela2 d1oela1  
d1v10a2 d1v10a3 d1v10a1 d2y5ia\_ d1qlsa\_ d1psra\_ d3n22a\_ d2egda\_  
d4ggfc\_ d2wcea\_ d2luca\_ d4aqia\_ d3nsia\_ d2lp3a\_ d1j55a\_ d1a4pa\_  
d1nsha\_ d1a3qa1 d1iknc\_ d3brda1 d1p7h11 d1oy3c\_ d1imhc1 d1gjia1  
d1zk9a1 d2cxka1 d2bema\_ d1pama1 d1lea9c1 d1qhoa1 d2fhfa2 d2fhfa1  
d1k3ia1 d1j0ha1 d1csla1 d2bhua1 d1ledqa1 d1flsa2 d1lut9a2 d1gvia1  
d1txka1 d1zx5a1 d2phla2 d2phla1 d1fxza2 d1fxza1 d1lrha\_ d1uija1  
g1dgw.1 d2v09a\_ d1uika2 d1uika1 d1dgwa\_ d1ep0a\_ d2pa7a1 d1wlta1  
d2c0za1 d1nepa\_ d1ds6b\_ d1fstb\_ d1ex0a1 d1g0da1 d2b5ea2 d2b5ea3  
d2b5ea1 d2b5ea4 d2kp1a1 d2kp2a1 d1hyua3 d1hyua4 d1j08a1 d1j08a2  
d2bjca1 d2hsga1 d1qpza1 d1k9ua\_ d2opoa\_ d1ydwa2 d2nvwa2 d1h6da2  
d1zh8a2 d1xeea2 d1tlta2 d1ebfa2 d1e3oc2 d1ic8a2 d2ovga\_ d1sq8a\_  
d1rzsa\_ d3kz3a\_ d3orca\_ d3gpdg2 d2q49a2 d1hdgo2 d2g17a2 d2cvoa2  
d2czca1 d3pwka2 d1obfo2 d1i32a2 d1zyao2 d2pkqo2 d1b7go2 d2hjsa2  
d1cf2o2 d1vkna2 d1nvmb2 d1lux8a\_ d1dlya\_ d4i0va\_ d2bkma\_ d2bmma\_  
d2msya\_ d2djoa1 d2r5za\_ d1au7a1 d1f43a\_ d2lmda1 d1akhb\_ d1s7ea1  
d3nara\_ d1zq3p1 d2craa1 d1mija\_ d4uuta\_ d3a01a\_ d1x58a1 d3rkqa1  
d3cmya1 d2cqxa1 d2da6a1 d1e3oc1 d1fjla\_ d1mh3a1 d1ig7a\_ d1x41a1  
d1wh7a1 d1gt0c1 d2mw8a\_ d1lfup\_ d1x2ma1 d1b72a\_ d1wi3a1 d1wjha1  
d1x2na1 d1mnmc\_ d2cuea1 d3k2aa\_ d2hosa\_ d2jwta2 d1pufa\_ d1oact1  
d2hi3a\_ d1b8ia\_ d4j19a\_ d3lnqa\_ d1wh5a1 d1b8ib\_ d1fexa\_ d2cqra1  
d1guua\_ d1ug2a1 d2cqqa1 d2ajea1 d4a69c\_ d1h8ac1 d2crga1 d2iw5b1  
d1xc5a1 d1ofcx1 d2cu7a1 d1wgxa1 d2cjja1 d2ckxa1 d1gvda\_ d1hcra\_  
d1tc3c\_ d1gdta1 d1u78a2 d1mdwa\_ d1ziva1 d1zcma1 d2iu5a1 d1zk8a1  
d2g7sa1 d2fd5a1 d2np5a1 d1z0xa1 d2id6a1 d2d6ya1 d2i10a1 d1vi0a1  
d2oi8a1 d3c07a1 d2ns7a1 d2fq4a1 d2yvea1 d1t33a1 d2o7ta1 d1rktal  
d2np3b1 d2g7ga1 d2gena1 d2fbqa1 d2g7la1 d2gfna1 d2g3ba1 d2jj7a1  
d2hyja1 d1sgma1 d1ui5a1 d2hkua1 d2id3a1 d4jyka1 d3lv8a\_ d1s3ga1  
d1zaka1 d1s4qa\_ d3tvta2 d1uf9a\_ d1khta\_ d1ckea\_ d1osna\_ d1p5zb\_  
d4tmka\_ d3cm0a\_ d1tmka\_ d1jaga\_ d3h86a\_ d1t0hb\_ d1nn5a\_ d2h92a\_  
d3kb2a1 d2c95a1 d1yj5a2 d1kgda\_ d1ly1a\_ d2ak3a1 d1vyva2 d1deka\_  
d2grja1 d1p3ja1 d1y63a\_ d1e4ya1 d1s96a\_ d3iija1 d1lvga\_ d1nksa\_  
d1vyua2 d4e22a\_ d1qf9a\_ d1q3ta\_ d1ki9a\_ d1lw7a2 d1teva\_ d1kjwa2  
d1gsia\_ d1g3ma\_ d1j99a\_ d1t8ta1 d1nsta\_ d1fmja\_ d1zrha\_ d1ls6a\_  
d2a3ra\_ d1aqua\_ d2zptx\_ d3ckla\_ d1texa\_ d1q44a\_ d2gwaha\_ d1uj2a\_  
d4gi7a\_ d2jeoa1 d1rz3a\_ d1z0ja1 d3umra2 d3gj0a1 d2gaoa1 d1yzga1  
d1x3sa1 d1g7sa4 d1puja\_ d1udxa2 d1kk1a3 d2o52a\_ d1jwyb\_ d1zcaa2  
d1zcba2 d2fv8a1 d2cjwa\_ d3dz8a1 d1xzpa2 d1vg8a\_ d4qxaa\_ d2ew1a1  
d1x1ra1 d2bcgy\_ d3doea1 d3cona\_ d3rega\_ d3wyga\_ d1upta\_ d2b6ha1  
d1zd9a1 d1lnza2 d1r5ba3 d1n0ua2 d1r2qa\_ d2f91a1 d2rhda\_ d3q3jb\_  
d3q85a\_ d1efma1 d1r8qa\_ d2gf9a1 d2akab1 d1ek0a\_ d1z08a1 d2gcoa1  
d2dyla2 d4g01b\_ d2cxxa1 d1svia\_ d3q72a\_ d1ni3a1 d4ac9a4 d2erxa1  
d2bmea\_ d1wxqa1 d2gf0a1 d4ldja1 d1zunb3 d1d5ca\_ d4lv5b\_ d1efca3

d1kmqa\_ d2g6ba1 d3lrpa\_ d1tada2 d2y8ea\_ d4rd4a1 d1z06a1 d2heia\_  
d3a58b\_ d1u01a2 d1d2ea3 d1zj6a1 d2ocba\_ d3rwoa\_ d1mr3f\_ d2e9sa1  
d4u5xa1 d2iwra\_ d2fn4a1 d3bwdd\_ d2nzja1 d2atva1 d2ksqa\_ d3l43a\_  
d1mkya2 d1mkya1 d1wmsa\_ d1jnja3 d2rmka\_ d1f6ba\_ d1f60a3 d1gota2  
d1jala1 d2fh5b1 d1g16a\_ d2wblc\_ d1m7ba\_ d1wf3a1 d1f5na2 d1t9ha2  
d1z6xa1 d1z0aa1 d2fg5a1 d2a5ja1 d2bcjq2 d1s0ua3 d1ky3a\_ d4y0va\_  
d4lhwa\_ d2qmea1 d2atxa1 d1egaa1 d1ryha\_ d1moza\_ d1nrjb\_ d2erya1  
d3bfka\_ d1puia\_ d1fzqa\_ d3j3az1 d3t5ga\_ d1shza2 d3defa\_ d2f7sa1  
d3raba\_ d3tsoa\_ d3aq4a\_ d2a17a1 d3sfva1 d3bc1a\_ d2ncda\_ d1sdma\_  
d3h4sa1 d2heha\_ d2grya\_ g3kin.1 d1kk8a2 d1br2a2 d1goja\_ d1f9va\_  
d2mysa2 d1lkxa\_ d3t0qa\_ d4db1a1 d3gbja\_ d1ry6a\_ d1v8ka\_ d1k8ka2  
d1k8ka1 d3uleb1 d3i33a2 d3i33a1 d1dkgd2 d1dkgd1 d4ci6a2 d1jcfa1  
d4a2ba2 d2fxua1 d1yaga2 d1yaga1 d4cbua2 d1bupa2 d3vrda1 d3vrda2  
d1fcdc2 d1fcdc1 d1h1oa1 d1m70a2 d1m70a1 d1iqca2 d1iqca1 d1eb7a2  
d1nmla2 d1nmla1 d3h1jd1 d1hroa\_ d4gedb\_ d3zooa\_ d1mz4a\_ d1gu2a\_  
d1f1fa\_ d1dvva\_ d1c6ra\_ d1c75a\_ d1e29a\_ d1gdva\_ d1cnoa\_ d1h32b\_  
d1co6a\_ d2bh4x\_ d2aiua\_ d5cytr\_ d1jdl\_ d1i8oa\_ d2zboa\_ d3dmia\_  
d1ls9a\_ d1wvec\_ d2yk3a\_ d3ph2b\_ d1dw0a\_ d5aura\_ d1ql3a\_ d1qn2a\_  
d1f1ca\_ d1prtc2 d2ah2a1 d1fwxal d1libya\_ d1evsa\_ d1cnt1\_ d1pvhb\_  
d1z7ca\_ d1huwa\_ d1rhga\_ d1f6fa\_ d1f45b\_ d1i1rb\_ d1axia\_ d4x51a\_  
d1d9ca\_ d4ypgc1 d3oq3a\_ d1lqsl\_ d1n1fa\_ d1aula\_ d1wu3i\_ d3bes1\_  
d3ux9a\_ d2ejca\_ d3muea1 d1ihoa\_ d3q12a1 d3rbaa\_ d2qtra\_ d1nupa\_  
d3l92a\_ d1f9aa\_ d1qjca\_ d2h29a\_ d1vlha\_ d1od6a\_ d1lw7a1 d1mrza2  
d4ruka\_ d2e17a\_ d1iq0a2 d1r6ta2 d1ivsa4 d2cyba\_ d1rqga2 d1j09a2  
d2yxna\_ d1f7ua2 d1h3fa1 d1ffya3 d2g36a1 d1nzja\_ d1jila\_ d1n31a\_  
d1i6la\_ d1pfva2 d1h3na3 d3n9ia\_ d3sz3a1 d3sw2a\_ d1moxc\_ d1dx5i3  
d1edmb\_ d1autl2 d1autl1 d1nqlb\_ d1dval1 d1szba2 d1kigl\_ d2y5f1\_  
d1ijqa2 d1gk5a\_ d1g1sa2 d1nt0a3 d1xdtr\_ d1lmja2 d1lmja1 d1nzia2  
d2wphe\_ d1klil\_ d1pfxl2 d1pfxl1 d1p9ja\_ d1g1ta2 d1f7ea\_ d4yzub\_  
d2mgpa1 d1b9wa2 d2mgpa2 d1ob1c1 d1ob1c2 d1n1ia2 d1n1ia1 d2npra2  
d2npra1 d1m1xb4 d1m1xb5 d1f56a\_ d1bypa\_ d1azca\_ d1ws8a\_ d3u25a\_  
d1cuoa\_ d1id2a\_ d1rkra\_ d2iaac\_ d4dp1x\_ d1nwpa\_ d2gima\_ d2i7sa\_  
d1qhqa\_ d1s5ja2 d1qhta2 d4dlea2 d1tgoa2 d3py8a2 d1q8ia2 d2py5a2  
d1d5aa2 d1pvaa\_ d3fs7a\_ d2pvba\_ d1ttxa\_ d1rwya\_ d2kyfa\_ d1rk9a\_  
d1a75a\_ d1exra\_ d1tiza1 d1nyaa\_ d1g8ia\_ d1ggwa\_ d1wdcc\_ d3fwba\_  
d1ggza\_ d2o5ga\_ d1ctaa\_ d1m45a\_ d3i5gc\_ d1sl8a\_ d1fpwa\_ d2scpa\_  
d2roaa\_ d4aqra\_ d3pn7b\_ d1br1b\_ d2mysb\_ d1s6ca\_ d1bjfa\_ d2obha\_  
d1jfk\_ d1jf0a\_ d1qv0a\_ d1lkja\_ d2mlfc\_ d2m97a\_ d2d8na\_ d4by5a\_  
d1jbaa\_ d4nqga\_ d1wdcb\_ d2mysc\_ d1j7qa\_ d1s6ia\_ d1uhka2 d1r2ua\_  
d1dtla\_ d3kf9a\_ d3pn7c\_ d1y1xa\_ d1hqva\_ d1dvia\_ d1df0a1 d1qxp2  
d4usla\_ d1k94a\_ d1wkya2 d1uuqa\_ d3wh9a\_ d4m1ra\_ d4xuya\_ d2je8a5  
d4bf7a1 d3cuia\_ d1ur4a\_ d1qw9a2 d1odza\_ d2vzsa5 d1bqca\_ d2x2ya1  
d1hjqa\_ d1qnra\_ d4y7ea1 d1vjza\_ d4k68a\_ d2v3ga\_ d4hpga\_ d1nofa2  
d1nq6a\_ d1h4pa\_ d1aq0a\_ d3ziza\_ d4bs0a\_ d1lecea\_ d1h1na\_ d1ta3b\_

d1w91a2 d1i1wa\_ d1uhva2 d1us3a2 d1legza\_ d7a3ha\_ d1tvna1 d3nyda1  
d1ghsa\_ d2cyga1 d4xv0a\_ d2c8na2 d1w32a\_ d3emca\_ d1v6ya1 d1foba\_  
d2uwfa1 d2fgla\_ d3niya1 d2c0ha1 d1rh9a1 d1yq2a5 d1szna2 d1fa2a\_  
d1pama4 d5do8a1 d1ea9c3 d2fhfa5 d1qhoa4 d1avaa2 d1m53a2 d4m8ua1  
d2gjpa2 d1lwaha2 d4howa1 d1ktba2 d1j0ha3 d3vm5a1 d2x1ia\_ d1wzaa2  
d1uasa2 d2diea1 d1mxga2 d1ht6a2 d1eswa\_ d1iv8a2 d5cpsa\_ d1ud2a2  
d1zjaa1 d3gbea1 d1kwga2 d1wdpa\_ d1gcya2 d1g5aa2 d1hvxa2 d3dhp2a2  
d2bhua3 d4do4a1 d3qgva1 d1e43a2 d1g94a2 d2d3na2 d1gjwa2 d1gvia3  
d1x1na1 d1r7aa2 d1tz7a1 d3c8da2 d2pbla1 d1jkma\_ d1jjia\_ d1lzla\_  
d31jqa\_ g1k2x.1 d4c7ga2 d2gjxa1 d1jaka1 d1yhta1 d4toqa\_ d1wb0a1  
d1w9pa1 d1eoka\_ d1itxa1 d1kfwa1 d1goia2 d1edqa2 d2gsja\_ d1hjxa1  
d1jnda1 d1vf8a1 d3wdpp1 d3wq5a\_ d1gnxa\_ d4gxp2a\_ d4hz8a\_ d1e4mm\_  
d3aiua\_ d1wcca1 d1qvba\_ d3ahxa\_ d1v02a\_ d2dga2\_ d1pbga\_ d1vffa1  
d1qoxa\_ d4ha4a\_ d1mixa2 d1e5wa2 d1j19a2 d1isna2 d2a16b2 d3syxa1  
d1mkea1 d2p8va\_ d1xoda1 d1evha\_ d1qc6a\_ d1egxa\_ d1id1a\_ d2hmta\_  
d1lssa\_ d1b9ra\_ d1offa\_ d1frfa\_ d3wcqa\_ d1e9ma\_ d1l5pa\_ d1wria\_  
d1i7ha\_ d3av8a\_ d1rfka\_ d3p1ma1 d3b2ga\_ d2bt6a2 d3nvva1 d1krha3  
d2h88b1 d1n62a2 d1t3qa2 d1kf6b2 d1zoyb1 d1jq4a\_ d1ffva2 d1rm6c2  
d1h6ta1 d91dta1 d2ewda3 d1up7a1 d2dfda1 d1s6ya1 d1vjta1 d1hyea1  
d1t2da1 d1ojsa3 d1b8pa1 d1ldna1 d1hyha1 d1civa1 d2a92a1 d1ez4a1  
d1i0za1 d1y6ja1 d1gv0a1 d1ur5a1 d1ll1da1 d1obba1 d1v8ba1 d1gdha1  
d1l7da1 d2dlda1 d1mx3a1 d1ygya1 d1qp8a1 d1li4a1 d1j4aa1 d2naca1  
d3t4ea2 d1a4ia1 d1o0sa1 d2hk9a2 d2egga2 d1b26a1 d1bvua1 d1gq2a1  
d1c1da1 d1leha1 d1gtma1 d1euza1 d1nvta1 d3dona2 d1edza1 d1gpja2  
d1vi2a1 d1p77a1 d1nyta1 d1b0aa1 d1vl6a1 d1v9la1 d1umqa\_ d1g2ha\_  
d3gpdg1 d1vc2a1 d2nvwa1 d1u8fo1 d1ydw1 d1hdgo1 d2g17a1 d1cf2o1  
d2czca2 d1r0ka2 d1obfo1 d2cvoa1 d1ebfa1 d1h6da1 d1i32a1 d1zh8a1  
d2q49a1 d1qkia1 d3pzra1 d1xeea1 d1vkoa1 d1vm6a3 d3qvsa1 d2pkqo1  
d1b7go1 d1gr0a1 d1p1ja1 d1lc0a1 d1j0xo1 d3pwka1 d2hjsa1 d1zyao1  
d1vkna1 d1tlta1 d1nvmb1 d3sjua\_ d3ojfa1 d1xu9a1 d2jjya1 d1n7ha\_  
d1y1pa1 d1h5qa\_ d1jtv2a\_ d4fs3a\_ d2bkaa1 d1gy8a\_ d2c5aa1 d1ulsa\_  
d1ooea\_ d2b69a1 d1y5ma1 d1spxa\_ d1ae1a\_ d1ydea1 d1gega\_ d1hdoa\_  
d1o5ia\_ d1e6ua\_ d1snya1 d2rhca\_ d3zv4a\_ d5ceja\_ d2d1ya1 d1fjha\_  
d3w8ea\_ d2fmua1 d1x1ta\_ d1rpna\_ d3ay7a1 d1k2wa\_ d1eq2a\_ d2hrba1  
d3ruaa\_ d2ew8a1 d4hwka\_ d1xgka\_ d2bd0a1 d1yo6a1 d2a35a1 d2ntva\_  
d1vl8a\_ d1hdca\_ d4bkua\_ d2ag5a1 d2q45a\_ d1nffa\_ d4iy1a\_ d1zbqa1  
d1kewa\_ d1ek6a\_ d1ja9a\_ d2q46a2 d1iy8a\_ d1cyda\_ d2ptga\_ d1hxha\_  
d1uzma1 d3lyla\_ d4m89a\_ d3wyea\_ d2b11a1 d1w6ua\_ d1sb8a\_ d2q2va\_  
d4nr0a\_ d1e6wa\_ d2gasa\_ d3oiga1 d2bgka1 d1mxha\_ d1vl0a1 d1rkxa\_  
d1r6da\_ d1wmaa1 d1e7wa\_ d2c07a1 d1xkqa\_ d3tzha\_ d1g0oa\_ d3lz6a\_  
d1qyca\_ d1ledoa\_ d1gz6a\_ d1loc2a\_ d1t2aa\_ d1zema1 d2xoxa\_ d1z45a2  
d1geea\_ d1p33a\_ d31t0a\_ d4e6pa\_ d2wyua\_ d1db3a\_ d4q9na\_ d1xhla\_  
d4o1ma\_ d1fmca\_ d2uvda\_ d2gdza1 d1uaya\_ d2z1ma\_ d2o23a2 d2fr1a2  
d2fr1a1 d1qsga\_ d1qyda\_ d4zjua\_ d2a4ka1 d1yb1a\_ d1wvga1 d1yxma1

d3f4ba\_ d1mg5a\_ d1xg5a1 d1r55a1 d3gboa\_ d1kufa\_ d1buda\_ d4q1la\_  
d1quaa\_ d1yp1a\_ d1wnia\_ d4ekfa\_ d2ckga\_ d1th0a\_ d2bkra\_ d4wfia\_  
d4cg1a1 d3visa\_ d1g0da4 d2f4ma1 d1x3za\_ d3ulra1 d1g9ka2 d1kapp2  
d1k7ia2 d3ioqa\_ d1fh0a\_ d1o0ea\_ d1khqa\_ d1m6da\_ d2cb5a\_ d1cs8a\_  
g8pch.1 d1s4va\_ d2pnsa\_ d1vsna1 d1mira\_ d1iwda\_ d2oula\_ d7pcka\_  
d3bwka\_ d3bcna\_ d2p86a\_ d1pvja\_ d1pcia\_ d1gece\_ d1deua\_ d4bs6a\_  
d1xkga1 d1cqda\_ d1jqpa2 d2c0ya\_ d2bdza\_ d3p5ua\_ d1zoya1 d1d4ca2  
d1chua2 d1jnra2 d1kf6a2 d2jk6a2 d2jk6a1 d1feca1 d1feca2 d1lpfa1  
d1lpfa2 d1xhca1 d1xhca2 d1dx1a2 d1dx1a1 d1gera2 d1m6ia2 d1onfa1  
d1onfa2 d3lada2 d3lada1 d1w4xa1 d1w4xa2 d1gesa2 d1mo9a1 d1xdia1  
d1f12a2 d1fcda1 d1fcda2 d1h6va2 d1h6va1 d1mo9a2 d1gv4a2 d1gv4a1  
d2gv8a2 d2gv8a1 d1aoga1 d1aoga2 d1hyua1 d1ebda1 d1ebda2 d3dk9a1  
d1q1ra2 d1q1ra1 d1gesa1 d1zbf1a1 d2z1ha\_ d2etja1 d3qioa1 d1j11a\_  
d2e41a\_ d1j12a\_ d21sna1 d1io2a\_ d1uaxa\_ d2yv0x\_ d1mu2a1 d1ekea\_  
d1i39a\_ d1ps9a2 d1lqta1 d1cjca1 d1pn0a1 d1ju2a1 d2f5va1 d3c96a1  
d2gmha1 d1pj5a2 d1gpea1 d1o5wa1 d1n4wa1 d1k0ia1 d2dw4a2 d2ivda1  
d1seza1 d2voua1 d1kdga1 d1xl4a1 d3vsqa\_ d2gixa1 d1p7ba1 d1iv0a\_  
d1nu0a\_ d2d5ra1 d1iuka\_ d2csua1 d3q9ub\_ d2yv1a1 d3q9na\_ d2d59a\_  
d2yv2a1 d1euca1 d1y81a1 d1wgqa1 d1v89a1 d2coda1 d1zc3b\_ d1wg7a1  
d1u5ea1 d1v61a1 d2coca1 d2ys1a1 d1v5pa1 d1ntya2 d1wjma1 d1wila1  
d1u29a\_ d1xx0a1 d1unqa\_ d2zkmx3 d1fhoa\_ d1v88a1 d2adza1 d1x1fa1  
d1p6sa\_ d2coaa1 d1btka\_ d1v5ma1 d1faoa\_ d2x18a\_ d1dyna\_ d1x1ga1  
d4kaxb\_ d2j59m1 d1ki1b2 d1xcga2 d1txda2 d1u5da1 d1dbha2 d1w1ha\_  
d1upqa\_ d1v5ua1 d1foea2 d2fj1a1 d1eaza\_ d2dfka2 d2cofa1 d1kz7a2  
d1jmx1a1 d1pbya1 d1pbya2 d1r7ha\_ d1faaa\_ d1wika1 d1xfla\_ d1ttza1  
d2f51a1 d1ti3a\_ d1nhoa\_ d1sena\_ d2i4aa\_ d1ep7a\_ d1zmaa1 d1fo5a\_  
d31efa1 d3diea1 d2yana1 d1z6na1 d1oaza\_ d3zywa1 d4aj8a\_ d1nm3a1  
d4fiwa\_ d1wmja\_ d4hs1a1 d1liloa\_ d1xwaa1 d1wjka1 d2vm1a\_ d1fb6a\_  
d1gh2a\_ d1h75a\_ d1nw2a\_ d1kx5b\_ d3a6na\_ d4m6ba2 d2nqbd\_ d3wkjd\_  
d2yfwe\_ d4h9na\_ d5bnxa\_ d1kx5c\_ d3r45a\_ d1eqzb\_ d4jjnb\_ d1f66c\_  
d1eqza\_ d4wnnb\_ d1kx5a\_ d1u35c1 d1lid3a\_ d2nqbc\_ d1kx5d\_ d1um8a\_  
d1ixza\_ d1qvra2 d1qvra3 d1qzma\_ d1sxjc2 d1jr3d2 d2p65a\_ d1l8qa2  
d1g8pa\_ d3hu3a3 d1sxjd2 d1njfa\_ d1in4a2 d1sxja2 d1tuea1 d2ce7a2  
d1w5sa2 d1sxjb2 d1ny5a2 d1ofha\_ d2gnoa2 d2a5yb3 d1fnna2 d1u0ja1  
d1lv7a\_ d1iqpa2 d2fnaa2 d1ixsb2 d4gita\_ d1sxje2 d1g41a\_ d1pd212  
d2a2ra2 d1k0dd2 d1f2ea2 d1gsua2 d1f3ba2 d2fhea2 d2pvqa1 d1tw9a2  
d1oyja2 d1e6ba2 d1k0ma2 d3ik7a1 d4is0a1 d1r5aa2 d1j1va2 d1m0ua2  
d3gtub2 d1z9ha2 d1okta2 d1axda2 d2gsra2 d1tu7a2 d1k3ya2 d1zgm1  
d1b48a2 d1gnwa2 d1gwca2 d2gsta2 d1glqa2 d1oe8a2 d1pn9a2 d1v2aa2  
d1fw1a2 d1duga2 d1g7ea\_ d2trcp\_ d1lig8a1 d1czan2 d1czan3 d1czan1  
d1lig8a2 d1czan4 d1bg3a4 d1bg3a3 d1bg3a2 d1txga2 d3f47a1 d1mv8a2  
d2pv7a2 d1xc2a3 d2ahra2 d4xiya1 d2f1ka2 d1pgja2 d1i36a2 d1np3a2  
d1lj8a4 d1teaa3 d1qmga2 d2i76a2 d2g5ca2 d1wdka3 d1dlja2 d3cuma3  
d1qqya\_ d1gd6a\_ d1f6ra\_ d1livma\_ d2gv0a\_ d1iiza\_ d2z2fa\_ d1j8xa\_



d1ghla\_ d1b9oa\_ d1741a\_ d1691a\_ d2o4wa\_ d1p37a\_ d1k28a3 d1xjta1  
d1jtma\_ d2f2qa\_ d4e97a1 d1g4ma1 d1g4ma2 d3w3ea\_ d4tx7a\_ d3cq1a\_  
d4msta\_ d3iwra\_ d2z37a\_ d4dyga\_ d2h0va\_ d4iuaa3 d4bvva\_ d5hpga\_  
d3k65a\_ d1ki0a3 d1ki0a2 d1ki0a1 d1a0ha1 d1pmla\_ d3sp8a3 d2feba1  
d1qsta\_ d2beia1 d4m3sa\_ d1u6ma1 d1ygha\_ d1yk3a1 d3dr6a\_ d1xmta\_  
d1z4ea1 d2ge3a1 d1bo4a\_ d2fiaa1 d2jdca1 d1y9wa1 d3to7a\_ d1wwza1  
d2f14a1 d2ozua1 d2b5ga\_ d2cy2a1 d2p0wa\_ d1cm0a\_ d4pswa\_ d1yreal  
d1yr0a1 d1m4ia\_ d2gana1 d1yvka1 d1ghea\_ d2g3aa1 d1y7ra1 d2euia1  
d1q2ya\_ d2fsra1 d1xeba\_ d2ae6a1 d1cjwa\_ d1qsma\_ d2aj6a1 d1y9ka1  
d1i12a\_ d1vkca\_ d2atra1 d1n71a\_ d2d4pa1 d2fiwa1 d2fe7a1 d1tiqa1  
d2ou2a\_ d1yx0a1 d2fcka1 d1p0ha\_ d2j8ma\_ d2pq8a\_ d1z4ra1 d1s3za1  
d2nqya\_ d1h4ga\_ d1hixa\_ d1oa2a\_ d1olra\_ d3b7ma\_ d4h7ma1 d3wp3a\_  
d2vgda\_ d1igoa\_ d3zsea\_ d2nlra\_ d3wx5a\_ d1oa3a\_ d1pvxa\_ d1m4wa\_  
d1f5ja\_ d1oa4a\_ d1ks5a\_ d4ix1a1 d1xvqa1 d3hy2a\_ d2cvba1 d1o8xa\_  
d1lu4a\_ d1we0a1 d2bmx1a1 d2a4va1 d1psqa\_ d1xiya1 d1q98a\_ d1n8ja\_  
d1zofa1 d2ggta\_ d3tjja\_ d4je1a1 d1o73a\_ d3s9fa\_ d2zcta\_ d1qmva\_  
d1jfua\_ d2b1ka\_ d5dvba1 d2b5xa1 d2v2ga\_ d1st9a\_ d3tb2a\_ d4llra\_  
d4fh8a1 d1e2ya\_ d1knga\_ d2h30a\_ d1i5ga\_ d2z9sa\_ d2f8aa1 d1tp9a1  
d2b7ka\_ d1nm3a2 d3hvva\_ d2wfca1 d4kcea\_ d1xvwa1 d4ggca1 d3qpma\_  
d4k1fa\_ d1zzoa1 d1gp1a\_ d1prxa\_ d1rwl1a\_ d1z3ea1 d3l78a\_ d1e88a1  
d1l6ja4 d1eaka4 d1eaka3 d1l6ja3 d1h8pa2 d1h8pa1 d1etha2 d1w52x1  
d2ppla1 d1hpla2 d1lpbb2 d2oxea1 d1rp1a2 d1ys1x\_ d4hs9a\_ d1ispa\_  
d1ex9a\_ d1ku0a\_ d3qmma\_ d1ra6a\_ d1muka\_ d3gsza\_ d1khva\_ d1te9a\_  
d2xwha\_ d3uqsa\_ d3hkwa\_ d3n6ma\_ d2cjqa\_ d2xyma\_ d1teba\_ d1te8a\_  
d1u09a1 d4wfxa\_ d3tyqa\_ d2pgga1 d1gyta2 d1lgya\_ d4l3wa\_ d1llfa\_  
d1ukca\_ d2hqya1 d2hqya2 d1lrza2 d1ne9a1 d1lrza3 d1cr6a2 d1jlia\_  
d2rhwa\_ d3groa\_ d1pjaa\_ d1thta\_ d2ftba\_ d1pmpa\_ d2rcqa1 d1fdqa\_  
d4lkpa\_ d1sa8a\_ d1vyfa\_ d1lpja\_ d3vg7a1 d4azqa1 d5bvqa\_ d1p6pa\_  
d2qo4a\_ d1opba\_ d1yiva1 d1olva\_ d4bvma1 d4tkba\_ d4i3ba\_ d1bwya\_  
d1ftpa\_ d1ggla\_ d4gkca\_ d1cbia\_ d3p6da1 d1kqwa\_ d2a0aa1 d3zxha\_  
d1cgla\_ d1rm8a\_ d1eaka2 d1hy7a\_ d2jsda\_ d1hv5a\_ d1i76a\_ d4qmea2  
d2xdt2a d1z5ha2 d4dv8a2 d1m41a\_ d2bk7a\_ d3fjua\_ d1z5ra1 d1kwma1  
d1uwya2 d1jgga1 d2c1ca1 d1dtda\_ d1jgta2 d1ofda3 d1lea0a3 d1ecfa2  
d1q15a2 d1ct9a2 d1te5a\_ d1i26a\_ d1cixa\_ d1y29a\_ d1v7fa\_ d2jtba\_  
d1g9pa\_ d1lupa\_ d1qk7a\_ d1mb6a\_ d2a2va\_ d1niya\_ d1i25a\_ d1hvwa\_  
d2mpqa\_ d1ie6a\_ d1kqha\_ d1la4a\_ d2mxoa1 d1d10a\_ d1koza\_ d1qk6a\_  
d1emxa\_ d1lqra\_ d1c6wa\_ d1rmka\_ d1ixta\_ d1eyoa\_ d1cna\_ d1fu3a\_  
d1g1pa\_ d1f3ka\_ d1fyga\_ d1rypd\_ d1irua\_ d1rypc\_ d3unfk\_ d1rypa\_  
d1j2pa\_ d1irui\_ d1j2qh\_ d3unfh\_ d1m4ya\_ d1rypb\_ d1irul\_ d1irug\_  
d1iru2\_ d1q5rh\_ d1rypg\_ d1g3ka\_ d1iruf\_ d1q5qa\_ d1irub\_ d1ryph\_  
d3ty6a\_ d1iruj\_ d1iruk\_ d1rype\_ d1irud\_ d1irue\_ d3mi01\_ d1rypf\_  
d1iruh\_ d2z3ba\_ d1iruc\_ d3mka2\_ d1iru1\_ d1mqta\_ d1d4m3\_ d1fmd3\_  
d2mev1\_ g1aym.1 d1ev13\_ d4q4w1\_ d1r1a3\_ d2x5ia\_ d1rhi1\_ g1rla.1  
g1d4m.1 g1rhi.1 d1b35b\_ d1lopa\_ d1tme1\_ d4iv1a\_ g1pvc.1 g1fnp.1

d1fpn1\_ d4gb31\_ d1d4m1\_ d1fmd1\_ d1ev11\_ d2wzr3\_ d1qqp3\_ g1fmd.1  
d2x5ic\_ d1rhi3\_ gloop.1 d1hxs1\_ g1hxs.1 d1fpn3\_ d1bev1\_ g2mev.1  
d1eah3\_ d1aym1\_ d1pvc3\_ d1qqp1\_ d1zba3\_ d1h8ta\_ d3vbhc\_ g1b35.1  
g1bev.1 d1hxs3\_ g1ev1.1 d1bev3\_ g1tmf.1 d1tmf1\_ d1b35a\_ d2mev3\_  
g1eah.1 g1h8t.1 d1eah1\_ d4q4w3\_ d1r1a1\_ d1aym3\_ d1pvc1\_ d1zba1\_  
d1h8tc\_ d1loopc\_ d1tme3\_ g1qqp.1 d4iv1c\_ g1tme.1 d3ubub\_ d1legia\_  
d1qo3c\_ d1v7pa\_ d1tdqb\_ d3ubua\_ d1c3ab\_ d1h8ua\_ d3bx4b\_ d1t8ca1  
d1sb2a1 d1qdda\_ d2ziba1 d3cada\_ d1byfa\_ d1j34b\_ d1jwia\_ d1jzna\_  
d1c3aa\_ d1oz7b\_ d1wmza\_ d3bdwb\_ d1hq8a\_ d1fifa1 d1dv8a\_ d3hupa\_  
d1wk1a1 d1umra\_ d2afpa\_ d3bx4a\_ d1gz2a\_ d1sl6a\_ d1v7pb\_ d3g8ka\_  
d1ixxa\_ d1j34a\_ d1jwib\_ d1g1sa1 d1y17a1 d1ja3a\_ d1fvub\_ d3bdwa\_  
d1sb2b1 d1fvua\_ d1umrc\_ d1oz7a\_ d4m17a\_ d3cfwa1 d1ypqa1 d1g1ta1  
d3fd4a\_ d3l9jc\_ d4dn8a1 d1v41b\_ d1rd11\_ d2msba\_ d4lt9a1 d3tc7a1  
d3hoja\_ d1i4na\_ d3vnda\_ d3n18a1 d1geqa\_ d3nav1 d1v5xa\_ d4a2ra1  
d3tc6a1 d4ijba\_ d1xcfa\_ d1vc4a\_ d1rd5a\_ d1qopa\_ d3b5va\_ d2r80b\_  
d1cqxa1 d1cg5a\_ d1gcvb\_ d3boma\_ d2h8fb\_ d2raoa\_ d3bj1a\_ d4hrrb\_  
d2r50a\_ d3d1kb\_ d2aa1b1 d3zhwa\_ d3hf4b\_ d3gdja\_ d1jebb\_ d3bj1b\_  
d1x9fb\_ d1wmub\_ d1gcva\_ d3bcqb\_ d3d4xb\_ d1gvha1 d2dc3a\_ d3hf4a\_  
d4yu3a\_ d3k8ba\_ d1qpwb\_ d2r80a\_ d3bcqa\_ d1v4wa\_ d3wtgb\_ d1j17a\_  
d4esaa\_ d1a9we\_ d3d1ab\_ d1fsla\_ d4h21a\_ d1v4wb\_ d1mwca\_ d1vhba\_  
d1jeba\_ d1spgb\_ d1h97a\_ d1q1fa\_ d1tu9a1 d3d1aa\_ d1hdsb\_ d3hyub\_  
d2zfb\_ d3fs4a\_ d1oj6a\_ d1shrb\_ d4h21b\_ d4yu3b\_ d1spga\_ d3hrwa\_  
d3qqra\_ d3at5a\_ d4wchd\_ d3hyua\_ d1cg5b\_ d1uc3a\_ d1hbra\_ d2raob\_  
d1outb\_ d4esab\_ d3gdjb\_ d3qqqa\_ d1x9fc\_ d3vrfa\_ d1litha\_ d3mkba\_  
d3d4xa\_ d3mjpa\_ d1j16a\_ d3fh9a\_ d1outa\_ d2dc3b\_ d1lit2a\_ d3eoka\_  
d3g46a\_ d1qpwa\_ d3vrfb\_ d1ch4a\_ d1x9fd\_ d1hdsa\_ d2zfa\_ d3mkbb\_  
d1or4a\_ d3wtga\_ d1a4fa\_ d3fh9b\_ d3bomb\_ d3cy5a\_ d3at5b\_ d1x9fa\_  
d2oifa\_ d4lmb\_ d1cpcb\_ d3v57a\_ d1kn1a\_ d1cpca\_ d4f0ta\_ d2vjha\_  
d4po5b\_ d1eyxa\_ d1alla\_ d4f0tb\_ d1b33b\_ d1b8db\_ d4h0mb\_ d1b33a\_  
d2vjhb\_ d4lm6b\_ d2vmlb\_ d1allb\_ d2vjta\_ d3dbja\_ d2vmla\_ d2vjtb\_  
d4f0ub\_ d1f99b\_ d4rmpa1 d1lliaa\_ d1eyxb\_ d2uulb\_ d4lmsb\_ d4f0ua\_  
d2bv8a\_ d1f99a\_ d2bv8b\_ d2c71b\_ d3dbjb\_ d4rmpb1 d1b8da\_ d4h0ma\_  
d3v57b\_ d1liab\_ d2uula\_ d2j96a\_ d3nqyb\_ d4gera\_ d1mtza\_ d2xqfa\_  
d1ea5a\_ d1f6wa\_ d1dx4a\_ d1qe3a\_ d1k4ya\_ d4qwwa\_ d2ha2a\_ d1r88a\_  
d1sfra\_ d4qeka\_ d1rpma\_ d2shpa1 d1yfoa\_ d1l8ka\_ d2ooqa1 d1g4us2  
d1p15a\_ d1lara2 d1lara1 d1wcha\_ d2fh7a2 d2fh7a1 d1w5qa\_ d2c1ha\_  
d1ohla\_ d1l6sa\_ d1gvfa\_ d3qm3a1 d2fjka\_ d1f74a\_ d3l21a\_ d2e1da\_  
d1to3a1 d1w3ia\_ d1sfla\_ d1vcva1 d4imea\_ d1wa3a\_ d2ocza1 d1f2ja\_  
d3m16a\_ d2yxga\_ d1ub3a\_ d3a5fa\_ d1fbaa\_ d1l6wa\_ d1xfba1 d1wx0a1  
d1vpxa1 d1ojxa\_ d1mxsa\_ d2a4aa1 d1xkya1 d3cq0a1 d3s1xa\_ d1f05a\_  
d1fdja\_ d3cpa1 d4d2ja\_ d1yloa2 d1y7ea2 d1y0ya3 d1lfwa1 d1vixa1  
d1fnoa4 d1vhoa2 d1ysja1 d1vhea2 d1z21a1 d2fvga2 d1vgya1 d1r3na1  
d2grea2 d1xmba1 g1q71.1 d1rtqa\_ d3rp2a\_ glucy.1 d1fuja\_ d2zchp\_  
d3w94a\_ d1si5h\_ d1lo6a\_ g2pka.1 d1cgha\_ d1kigh\_ d1a5ia\_ d3s9ba\_

d1hj8a\_ d1ao5a\_ d2anya\_ d1q3xa1 d1gvza\_ dlazza\_ d4gsoa\_ d2f91a1  
d1iaua\_ d1gdna\_ d1eufa\_ g1fiw.1 d1eq9a\_ d4nfea\_ d2rdla\_ d1spja\_  
d1elva1 d1a7sa\_ d1ekbb\_ d1pfxc\_ d1yc0a\_ d2aiqa\_ g1fiz.1 d1fi8a\_  
d4k60a\_ d4dgja\_ d1mzaa\_ d1op0a\_ d3tjva\_ d1pytd\_ d1sgfg\_ g1gg6.1  
d2eeka\_ g1rtf.1 d1a0ja\_ d3g01a\_ d1pytc\_ d4e7na\_ d1ddja\_ d1z8ga1  
d2hlca\_ d1npma\_ d1brup\_ g1jou.1 d1sgfa\_ d1autc\_ g2hnt.1 g1kdq.1  
d1orfa\_ d3s69a\_ d4crga\_ d1fxya\_ d1bqya\_ d1svpa\_ d1mbma\_ d3su6a1  
d1cula1 d4agka\_ d1vcpa\_ d1q31a\_ g1n11.1 d3e90b\_ d1ep5a\_ d3u1jb\_  
d3gv5b1 d1t94a2 d3bq0a2 d3lgia\_ d3i77a\_ d2z9ia2 d4nsva\_ d1lcya2  
d4jcna\_ d1agja\_ d1os8a\_ d1hpga\_ d1p3ca\_ d1qtfa\_ d1e69a\_ d1mv5a\_  
d3g60a4 g1ii8.1 d1ewqa2 d1ji0a\_ d1qhla\_ d1v43a3 d2wmfa1 d1vpla\_  
d1g2912 d4a82a2 g1f2t.1 d2d62a1 d3tuic1 d2bbsa1 d3g60a3 d2ixea\_  
d1g6ha\_ d1sgwa1 d2qi9c\_ d3rlfa1 d3b60a1 d3d31a2 d2pzea1 g1xew.1  
d1jj7a\_ d2onka1 d1wlwa\_ d1iwea\_ d1qf5a\_ d1vmaa2 d1nija1 d1np6a\_  
d2p67a1 d3ihla\_ d1okkd2 d1ls1a2 d1s1ma2 d1iona\_ d2v40a\_ d1dj3a\_  
d3hida\_ d2vola1 d2g0ta1 d1vcoa2 d1j8mf2 d1xjca\_ d1p9ba\_ d1qzxa3  
d1ihua2 d1ihua1 d2qm8a\_ d1dj2a\_ d4ioja\_ d1cp2a\_ d1yrba2 d1hyqa\_  
d3gqba2 d1skye3 d1xp8a1 d1tf7a2 d1tf7a1 d1ye8a1 d1skyb3 d2qe7d2  
d4blta\_ d4huta\_ d3l1daa2 d4hyya\_ d2i3ba1 d1crla\_ d3j9tb2 d3ntua2  
d1vdza1 d2z43a\_ d1e9ra\_ d1nlfa\_ d3ziaa2 d1n0wa\_ d3ziad2 d3j9ta2  
d1pzna2 d3gqbb2 d2i49a\_ d1nnfa\_ d1xvxa\_ d1ursa\_ d1h3da1 d1iuda\_  
d4m1va1 d1twya\_ d3e13x\_ d2nxoa1 d4pfua\_ d3ttma\_ d1elja\_ d2qmw1  
d1us5a\_ d1y3na1 d1jeta\_ d1uqwa\_ d4f19a1 d2esna2 d3thia\_ d3fasa1  
d2uyeb\_ d2xwva1 d1r91a\_ d2fyia1 d2ozza1 d1sw5a\_ d1nh8a1 d1vr5a1  
d2g29a\_ d1xs5a\_ d3lswa\_ d2z23a\_ d3w9va\_ d3tcha\_ d1q35a\_ d1z7me1  
d3q27a\_ d1p99a\_ d1ve4a1 d2i6ea1 d4mcoa1 d4n8ya\_ d1eu8a\_ d1zbma1  
d1hsla\_ d1ixca2 d1j1na\_ d1xvya\_ d1y9ua\_ d2z22a1 d1xoca1 d4oera\_  
d1wdna\_ d5f1qa1 d1xt8a1 d1i6aa\_ d4gwoa\_ d4igta1 d1pc3a\_ d4mmpa1  
d1o63a\_ d2cz1a1 d2onsa2 d4mija1 d1eh3a\_ d3skpa\_ d1dtza1 d1dtza2  
d1ieja\_ d1jnfa2 d1ce2a1 d1jnfa1 d1b1xa2 d1b1xa1 d1jw1a1 d1jw1a2  
d1ryoa\_ d1h76a1 d1h76a2 d3q3ma\_ d1za0a1 d1mxra\_ d2inca\_ d1jk0a\_  
d2incb\_ d1mhyb\_ d3hf1b\_ d1mtyb\_ d1r2fa\_ d2uw1a\_ d1mhyd\_ d3n37a\_  
d1afra\_ d1syya\_ d1mtyd\_ d2o1za\_ d1uzra\_ d1smsa\_ d2fkza\_ d1zuj1  
d1s3qa1 d2fjca1 d1z6om1 d1veia\_ d4dyya\_ d1jiga\_ d3gvya\_ d2pyba\_  
d4cy9a1 d3bvfa1 d1r03a\_ d2cf7a\_ d1nf4a\_ d1zs3a1 d4iwka\_ d3ka8a\_  
d3np0x\_ d1n1qa\_ d11b3a\_ d4e6ka\_ d1z6oa1 d2fzfa1 d4dyua\_ d3ge4a\_  
d1jgca\_ d4am4a\_ d2z6ma\_ d1ji5a\_ d1vlga\_ d1lkoa1 d1krqa\_ d3qz3a\_  
d1o9ra\_ d2ffxj\_ d1euma\_ d1yv1a1 d2v2pa\_ d1j30a\_ d4di0a\_ d1dpsa\_  
d1oewa\_ d2qzxa\_ d2asia\_ d1psoe\_ d1miqa\_ d1smra\_ d2h6ta\_ d1pfza\_  
d1lizda\_ d3hd8a\_ d1j71a\_ d1dpja\_ d4aa9a\_ d1t6ex\_ g1b5f.1 g1lya.1  
g1htr.1 d1qdma2 d1bxoa\_ d1wkra\_ d1tzsa\_ d1libqa\_ d2qzwa\_ d1ex4a2  
d2v76a\_ d1wj1a1 d1aqca\_ d1qqga2 d1qqga1 d1ntva\_ d1n3ha\_ d4dbba\_  
d3f0wa1 d1p3ra\_ d1wgua1 d2cy4a1 d3hqca\_ d1wvha1 d1xr0b1 d1bdqa\_  
d3ggta\_ d3ixoa\_ d1mrxa\_ d2haha\_ d1tw7a\_ d4njsa\_ d1sgua\_ d2p3da\_

d1nsoa\_ d3d3ta\_ d2rkfa\_ d1c6ya\_ d3ogpa\_ d3ekwa\_ d2o4na\_ d2j9ja\_  
d1baia\_ d3ggua\_ d3lzua\_ d4npua\_ d4j55a\_ d2r8na\_ d2fxda\_ d2p3ca\_  
d4dqea\_ d3ttpa\_ d3t3ca\_ d2p3aa\_ d2hc0a\_ d2fdda\_ d3mwsa\_ d1k8rb\_  
d1wgra1 d1wfyal d1e8ya3 d1wgya1 d1l1fda\_ d2cs4a1 d1wxma1 d2byea1  
d3kh0a1 d2byfa1 d1wxaa1 d1e7ua3 d1h4ra3 d4yl8a1 d2a16a3 d1wgda1  
d1wga1 d4q5eb\_ d1wjna1 d1se9a\_ d3n3kb\_ d1wz0a1 d1we6a1 d2m0xa\_  
d2gbka\_ d3rt3b1 d1wh3a1 d1sifa\_ d2ekec2 d4ii2b1 d4hk2a1 d1c3ta\_  
d1m94a\_ d1wgha1 d1ttna1 d1j8ca\_ d1wx8a1 d3v6cb1 d2ma9b\_ d4i6lb1  
d1bt0a\_ d2jvca1 d1iyfa\_ d2k1fa\_ d1wxva1 d1wf9a1 d1t0ya\_ d2io0b2  
d1x1ma1 d2gbma\_ d1zw7a1 d2m17a\_ d1we7a1 d2lwpa\_ d2gbja\_ d1wjua1  
d1v6ea1 d1v86a1 d4eewa\_ d1waaa1 d4icva\_ d4gu2a\_ d1wx7a1 d1wy8a1  
d4hjk1 d2faza1 d1v5oa1 d2a13a1 d2cr5a1 d1wj4a1 d1s3sg\_ d1tafa\_  
d1tafb\_ d1jfib\_ d1q9ca\_ d1h3ob\_ d2byka1 d1n1ja\_ d4g92b\_ d1bh9a\_  
d1jfia\_ d1h3oa\_ d2bykb1 d1n1jb\_ d3ubra\_ d1qo8a1 d1d4ca1 d2k3va\_  
d1ft5a\_ d1qdba\_ d1m1qa\_ d2j7aa\_ d1h21a\_ d1ogyb\_ d4fasa\_ d1oaha\_  
d1sp3a\_ d1g66a\_ d1qoza\_ d5ajha1 d3h33a\_ d1rwja\_ d19hca\_ d1os6a\_  
d3bxua\_ d3h4na\_ d1i77a\_ d3caoa\_ d1j0pa\_ d2ctha\_ d1duwa\_ d1ofwa\_  
d2e84a\_ d1gyoa\_ d3h34a\_ d1dszb\_ d1a6ya\_ d3cbba\_ d1ynwa1 d1r4ia\_  
d1hcqa\_ d2hana\_ d2hanb\_ d2enval d1kb4b\_ d2n11b\_ d1l01a\_ d1cita\_  
d2dara2 d2dara1 d1wyha2 d2d1oa2 d1rutx4 d1rutx3 d2cuqa2 d1x41a2  
d1x41a1 d1x3ha2 d1x3ha1 d2d8za1 d1x61a2 d1x6aa1 d1x6aa2 d2cora2  
d2cora1 d1v6ga1 d1v6ga2 d2d8za2 d1x64a1 d1x64a2 d1b8ta1 d2co8a1  
d1x63a2 d2dj7a2 d2dj7a1 d2cu8a2 d2cu8a1 d1g47a2 d1g47a1 d1j2oa1  
d1wyha1 d2d1oa1 d1wiga1 d1wiga2 d2cupa2 d2cupa3 d1x68a1 d2d8ya2  
d2d8ya1 d1m3va2 d1x62a1 d1x68a2 d1x61a1 d1b8ta3 d1b8ta2 d2d8xa2  
d2d8xa1 d1x4ka1 d1x4ka2 d2cuqa1 d1m3va1 d2co8a2 d1x63a1 d2cura1  
d2cura2 d1x62a2 d2e3fa\_ d1mm0a\_ d2e3ea\_ d2l1da\_ d2ny8x\_ d2e3ga\_  
d2ny9x\_ d2nz3a\_ d2l1j7a\_ d1n4na\_ d2m8bb1 d2kyqa\_ d3psma\_ d1jkza\_  
d1jxca\_ d2g11a\_ d1ugla\_ d4uj0a\_ d2k4ua\_ d1hp2a\_ d2l1u9a\_ d1baha\_  
d2meoa1 d1wm7a\_ d1h1ya\_ d1n8ma\_ d1j1za\_ d1wpda\_ d1c55a\_ d1pvza\_  
d1wt7a\_ d1rjia\_ d1wz5a\_ d1m2sa\_ d1pjva\_ d1c49a\_ d1qkya\_ d2ktca1  
d1wmta\_ d1du9a\_ d1j5ja\_ d1r1ga\_ d1t0za\_ d2i61a\_ d1t1ta\_ d1sn4a\_  
d1kv0a\_ d2l1kba\_ d1npia\_ d1wwna\_ d1pe4a\_ d2kbka\_ d2l1i7a\_ d1djta\_  
d2kbha\_ d1dq7a\_ d1sega\_ d1omya\_ d1zywa1 d1jzaa\_ d1n9wa1 d1bbua1  
d1c0aa1 d1b8aa1 d1l0wa1 d3a74a1 d1eova1 d1t61c1 d1iyjb4 d1iyjb5  
d1iyjb3 d1o7ia\_ d4ipca1 d1x3ea\_ d4apva\_ d1jb7a1 d1jb7a2 d1jb7a3  
d3kdfa\_ d1ue1b\_ d1wjja1 d3eiva\_ d1xjva2 d1xjva1 d2ccza2 d1se8a\_  
d1l1loc\_ d1jb7b\_ d1qvca\_ d1qzga\_ d1miua4 d1miua5 d1miua3 d3g48a1  
d1gd7a\_ d1mkha\_ d1jjcb3 d1pyba\_ d1y14b1 d2nn6i1 d1i941\_ d2zjra2  
d1smxa\_ d2qamc2 d1hh2p1 d2r7da1 d1r12a2 d1wfqa1 d3bzka4 d1x6oa2  
d3a0ja\_ d2j01d2 d2ja9a1 d4q15a\_ d1hr0w\_ d1l1uza\_ d2n3sa\_ d2vnud1  
d1h95a\_ d1go3e1 d2nn6h1 d2mo1a\_ d1iz6a2 d1jjga\_ d1e3pa2 d2ix0a3  
d2ix0a2 d2l1xja\_ d1ueba3 d1ueba2 d2z0sa1 d1u01a1 d2ix0a1 d2eifa2  
d2je6i1 d3i2za1 d2c35b1 d2ahob2 d1t9ha1 d3i4oa\_ d2qall1 d1jt8a\_

d2nn6g1 d1g6pa\_ d3cama\_ d1i94q\_ d1c9oa\_ d1d7qa\_ d2ba0a1 d2vnud2  
d2vnud3 d1khia2 d2qalq1 d1wi5a1 d1xtda2 d1ny4a\_ d1dgsa2 d1fvial  
d1ckma1 d1p16a1 d1x9na2 d2h1ia1 d2r8ba1 d3b5ea1 d3cn9a\_ d1lauoa\_  
d3azya\_ d3wvja\_ d1upsa1 d1ajoa\_ d2hyka\_ d1ajka\_ d2vy0a\_ d1o4ya\_  
d3o5sa\_ d3d6ea\_ d3atga\_ d1dypa\_ d1umza\_ d3i4ia\_ d1c1la\_ d4lbqa\_  
d1a78a\_ d1slta\_ d4no4a\_ d3zsja\_ d3duia\_ d1g86a\_ d1is3a\_ d1hlca\_  
g1qmo.1 g1len.1 d3zyra\_ d1fnya\_ d1n47a\_ g21tn.1 d1avba\_ d3usua\_  
d1dhkb\_ d1f9ka\_ d1lukga\_ d1g8wa\_ d1g9fa\_ d1wbfa\_ d3wcsa\_ d1g7ya\_  
g1loe.1 d1mvqa\_ d1hq1a\_ d1v6ia\_ d1dbna\_ d1fx5a\_ d418qa\_ d1ioaa\_  
d3n35a\_ d1epwa1 d2h0ba\_ d2erfa\_ d1h30a2 d1h30a1 d3mw4a1 d2r1ba\_  
d3v64a1 d1d2sa\_ d3bopa1 d3mw3a1 d1okqa1 d1okqa2 d1wioa4 d1ccza2  
d1vcaa1 d1dr9a2 d2d9qb1 d2nxyb2 d1adqa1 d1fnga1 d1uvqb1 d1zs8a1  
d2vola1 d2vola2 d1mfb12 d2jelh2 d1uwel2 d3qq4b1 d1kjvb\_ d1k5na1  
d1osph2 d4odh12 d1ow0a1 d1ow0a2 d1bfob2 d319ra2 d3jtth1 d2fath2  
d4elkb2 d1fn4b2 d2xfxb\_ d1pg7x2 d4k71b2 d11k2a1 d1eapb2 d41fhg2  
d1i4fa1 d2nw2a2 d1kfah2 d1mhca1 d1h3ua1 d1wejh2 d1h0db2 d1a5fh2  
d1kcvh2 d1mjuh2 d1qqda1 d1kcrh2 d1k8ia1 d3huja2 d2nnab1 d1nfd2  
d3mffb2 d1s9va1 d11k3h2 d1q0xl2 d1fv1b1 d1neza1 d4rfeb2 d1r3ha1  
d1a6tb2 d1kjva1 d1pz5b2 d1onqa1 d2bc4a2 d1de4a1 d1k8da1 d1tcra2  
d1dn0b2 d1nfde2 d2xwtb2 d1bfoa2 d1mexh2 d1iakb1 d1ypzf2 d4f7ea2  
d1q72l2 d2fbjh2 d1fe8h2 d1clzh2 d1fngb1 d1uvqa1 d1vgka1 d1c16a1  
d4j12a2 d4x99b2 d1igtb3 d1je6a1 d1q72h2 d1nldh2 d1teth2 d2hmic2  
d1i1ca2 d1i1ca1 d1k8ib1 d1q0yh2 d1kfa12 d3frua1 d1pg7w2 d1u58a1  
d1igyb4 d1igyb3 d1hyrc1 d1klub1 d1deeb2 d1c12b2 d2bc4b2 d2ig2h2  
d1kcv12 d3wn5b1 d11k2b\_ d11k3l2 d1mjul2 d1sm3h2 d1q0xh2 d1zvsa1  
d1ydpal d1u8ib2 d1ypze2 d1kcu2 d1op9a\_ d1y01a1 d1letzb1 d1legj11  
d2gsib1 d1nj9a1 d4jfh1 d1aqk11 d1t2ja\_ d1lo4h1 d1zvya1 d3v4v11  
d4enec1 d1kxtb\_ d5e8ea1 d2pxya\_ d4weud\_ d1xiwc\_ d2esvd1 d1qznh\_  
d1ogae1 d1f4xh1 d4n1hb\_ d3ezjb1 d3mlw11 d1kfah1 d1etza1 d1b4jh1  
d3cfic\_ d4w68a\_ d2arja1 d1ek3a\_ d2ok011 d1vera\_ d1uwgh1 d1blnb1  
d1fpth1 d1rzga1 d2giya1 d4m3kb1 d1nc2a1 d2nyyd1 d1ncna\_ d1fbih1  
d5dxwa\_ d4fqqa1 d1dqdh1 d1jfq11 d1kelh1 d1faih1 d1frgl1 d1figl1  
d4m6n11 d1fo0a\_ d4hxb11 d3b5ga\_ d3quyd1 d2h9gb1 d1i8kb\_ d2dd8h1  
d2ck0h1 d1eaja\_ d4w6wb1 d2a6ib3 d1t66d1 d2e27h\_ d1ob1b1 d1f11b1  
d2v7na1 d1ad0a1 d2xt1b1 d1pskh1 d4i13b1 d2op411 d1a0q11 d1uwel1  
d1za3a1 d1ncb11 d4uu9a\_ d1bm3h1 d1cloh1 d1nqba2 d1cf8h1 d4y5va\_  
d1mhph1 d5anma1 d4cdgc1 d4ldeb\_ d1y01b1 d2pcpb1 d1z3gl1 d1dfb11  
d1fh5h1 d3g5xa1 d1tzib1 d4dn311 d3zhka1 d2b1hh1 d2uylal d1f3dh1  
d1nj9b1 d2agjh1 d2h1pl1 d1q72h1 d8fabb1 d1ndmb1 d1rjca1 d4u6hb1  
d3upca\_ d2fbj11 d1osph1 d1tvda\_ d2cjev\_ d4fhbd1 d1bd2d1 d1rz7h1  
d3nn8a\_ d1blna1 d1knoa1 d1nfda1 d2bmkb1 d1dq11\_ d1igyb1 d1igf11  
d12e8h1 d3utza1 d1nc2b1 d1rihh1 d4mwfb1 d4jvpa1 d1mieh1 d1rhfa1  
d1fgn11 d1sbsh1 d1lp9e1 d1dn0a1 d4lqf11 d1iaih1 d1kgcd1 d1mh5b1  
d1gpol1 d2g60h3 d1f8t11 d2jixd1 d4grwh\_ d1fo0b\_ d1bfob1 d1axsa1

d1u9ka\_ d1nmbh\_ d1h8na1 d1h8na2 d1jguh1 d4eura1 d3sdy11 d35c8h1  
d1w72l1 d1mvub\_ d1i9rh1 d1ob1a1 d4wenb\_ d1yeeh1 d3ietc1 d1f58h1  
d1ad0b1 d1mqkl\_ d1nbvh1 d4b50a\_ d3r8bb\_ d1baf11 d1mamh1 d4rgne1  
d2gsgb\_ d35c8l1 d1bafh1 d1ai1h1 d2pcpa1 d2fath1 d2x1pa\_ d1orsb1  
d1ibgl1 d1shma\_ d1a2yb\_ d1u0qa\_ d2coqa\_ d1hilb1 d1qfwi\_ d1jv5b\_  
d1fn4b1 d5e0qa\_ d1nsnh1 d1plgl1 d4ocxl1 d1kb5h1 d1rzhf1 d1pg7x1  
d2fx7h1 d2oi9c\_ d1l7il1 d3eyva1 d1d5il1 d4ffyl\_ d1tet11 d1a6wh\_  
d1ac6a\_ d3dvfa\_ d1nfdel d1mimh1 d1ri8a1 d1jhlh\_ d3dura\_ d1fskb1  
d1f97a1 d3so3b1 d2ak4d1 d1lp9f1 d4z7wf1 d1l7th1 d4y5ya\_ d4x7ec1  
d1emth1 d1ikfl1 d1nlbh1 d4uta11 d1bjma1 d1eapb1 d1u6ah1 d2dtgd1  
d1kj2b\_ d1xeda1 d1cleh1 d1fgvh\_ d2bnub1 d2fb4h1 d2dtgb1 d1ktrh\_  
d1jpth1 d1qkz11 d4hepg\_ d2atpb1 d1flrh1 d2hrp11 d1mvfa\_ d1iaim1  
d3k80a1 d2jb5h1 d3zkxc\_ d4grwe\_ d1it9h1 d1rhhb1 d3w9ec\_ d1e4wh1  
d1sy6h1 d2j6eh1 d3qxta\_ d1jglh1 d1p7ka1 d1tzhb1 d4n8pa1 d1gaf11  
d2jelh1 d1wioa2 d4i0cc1 d1cicb1 d1lmka2 d1lmka1 d1iqwh1 d1orqb1  
d1ejoh1 d1jnlh1 d4zgl1a\_ d43c9b\_ d1ggbl1 d1wejh1 d3q6fa1 d1f3dj1  
d3c6la1 d1bqlh1 d3p9wb\_ d1a3r11 d1h0db1 d2uzil\_ d1eo8l1 d1qfwl\_  
d1n7ml1 d1igja1 d1c5ch1 d2a9mh\_ d1rmfh1 d1fj1b1 d4heme\_ d1ccza1  
d1a5fh1 d1ogad1 d1dlfh\_ d1qa9b\_ d1vgel1 d3qskb\_ d1sjxa\_ d4ozfg1  
d1sq2n\_ d1qd0a\_ d1kcvh1 d1c5db1 d3qcull d3bn9d1 d1mjuh1 d4y8dc\_  
d7fabh1 d3dvgb1 d1lo0l1 d1a6tb1 d1gigh1 d1kcrh1 d2hwz11 d1yjdc1  
d3clfl1 d4krna\_ d1dl7l\_ d1e6ol1 d1mexh1 d3r0ma\_ d4kkna\_ d1fns11  
d1oaqh\_ d1rzia1 d1lucbh1 d1ncwl1 d4b41a\_ d1nfdfl d2mpah1 d2d7t11  
d4grwf\_ d4b5ea\_ d1lk3h1 d3u79a\_ d4u3xa\_ d1ghfl1 d1bvkb\_ d1mcww1  
d1b88a\_ d1jrhh1 d32c2b1 d4wemb\_ d1dsfh\_ d1op3h1 d1ce1l1 d1iqda1  
d1qoka1 d1qoka2 d1qfuh1 d2crya1 d1ay1h1 d1oaql\_ d3ab0b\_ d1rur11  
d1t4kb1 d1bz7b1 d1n0xh1 d1for11 d1lucbl1 d4w6yb\_ d43c9a\_ d2aab11  
d1tzia1 d4n1ca\_ d1k6qh1 d3g9ab\_ d4tvsal d1igmh\_ d1pz5b1 d3dx9a1  
d3wxwh\_ d1nakh1 d1kcul1 d3eaka\_ d4qlra1 d1cr9l1 d1d9ka\_ d1f4x11  
d1deea1 d2i27n2 d1c12a1 d2orbl1 d1j8hd1 d1mcph1 d1c5da1 d1kenh1  
d1bd2e1 d1h5ba\_ d4x7fc1 d3upaa\_ d1t3fa1 d1indh1 d2dtgc1 d4hc111  
d1zv5a1 d4wgvb\_ d1uwgl1 d4f37k1 d1aqkh1 d1vesa\_ d3zkqd\_ d1fpt11  
d1lo4l1 d1knob1 d3rrqa\_ d1ct8b1 d4orz\_ d1mlbb1 d4hgkc1 d1dqdl1  
d1bogb1 d4ozhe1 d1dr9a1 d1i7za1 d1dn0b1 d1kell1 d1rzi1 d1ypzf1  
d1wtla\_ d1hkfa\_ d1fail1 d1figh1 d2vyre\_ d1sjva\_ d1ohqa\_ d1bfoa1  
d1pkqb1 d1mjul1 d1b4j11 d1nsn11 d2arjb1 d1p4bh\_ d4aj0a\_ d3nn8b\_  
d2rcja1 d1f2xk\_ d4v1dd\_ d1adqh1 d2eksa\_ d4k3ga\_ d1jfqh1 d1luweh1  
d1frgh1 d4gftb\_ d1uz8b1 d4n1lea\_ d1bm3l1 d1clol1 d3mcka1 d2vq1a1  
d1ae6h1 d4aq1b1 d1uj3b1 d1nbqa1 d1fh5l1 d2ck0l1 d2ywza\_ d1q72l1  
d4nbxb\_ d1hila1 d4hzlb1 d2j88l1 d1zmya1 d1cd0a\_ d1a4ka1 d1pskl1  
d1a0qh1 d4krmb\_ d1ncbh1 d2fbjh1 d1j8he1 d1i3ua\_ d1cf8l1 d1fe8h1  
d2plya1 d1eeqa\_ d2x89a\_ d1ol0a\_ d2r0lh1 d1ub5a1 d1dfbh1 d3eyvb1  
d4jdvb1 d4p2cg\_ d2gsia1 d2agj11 d1u3ha1 d2h1ph1 d1rih11 d1fskc1  
d1boga1 d2a77l1 d1osp11 d1qfoa\_ d3dwta\_ d2fx7l1 d1rz7l1 d3stba1

d1pkqa1 d1b6da1 d1dzba2 d1dzba1 d1kj2a\_ d4l1ha\_ d1rzgb1 d1dqlh\_  
d12e8l1 d1miel1 d1jmaa\_ d1sbsl1 d1fgnh1 d1f58l1 d1mqkh\_ d1ndgb1  
d3qeg11 d1iaill d2aw2a1 d1tqbc1 d3fo2a1 d4dkaa\_ d1f8th1 d2g60l1  
d2ywy\_ d1uj3a1 d1yc7a\_ d3bd3a\_ d4w6xb1 d1nmb1\_ d1i8ka\_ d1rjlb1  
d1ypze1 d1p7kb1 d1kxqe\_ d1gpoh1 d2z4qa1 d1w72h1 d1i9rl1 d4qgya1  
d4xt1c\_ d2qqnh1 d1cica1 d3c08h1 d2cd0a\_ d2bdnh1 d1hnga1 d1mam11  
d1nldh1 d1cr9h1 d4lcih1 d3bkyh1 d3qg7l1 d1ai1l1 d1kxvc\_ d4iosd\_  
d1l7ih1 d2x1qa\_ d1ub6b1 d3k74b\_ d1libgh1 d1teth1 d1igya1 d1hxma1  
d2x6ma\_ d2e71a\_ d5e03a\_ d1qfwm\_ d2r0kh1 d1igjb1 d1rurh1 d1plgh1  
d1mj8h1 d1yuhb1 d3fmg11 d1rzfl1 d1emt11 d1ad9b1 d1igtb1 d1nlb11  
d1d5ih1 d3k7ua\_ d4ffyh\_ d1bwwa\_ d3dvgal d1a6ta1 d1fgvl\_ d4qxgl1  
d1mim11 d1jhl1\_ d2hffb1 d2hh0l1 d1qkzh1 d1l7tl1 d1afvh1 d1iaii1  
d2cjuh\_ d1um5h1 d2ghwb2 d2ghwb1 d1kgce1 d2fgwh1 d1ikfh1 d1dvfd\_  
d2i24n1 d2xtjb\_ d1za3b1 d2yc1a\_ d2hh0h1 d2x1oa\_ d1bvka\_ d1rjla1  
d5e7ba1 d1igta1 d1i11b1 d2fb4l1 d1mvua\_ d1jpt11 d32c2a1 d1fvca\_  
d1iqdb1 d2hrph1 d2p4ab\_ d4qo1a\_ d1p2cb1 d1wt5c\_ d1t4ka1 d5c1mb\_  
d1it9l1 d1bz7a1 d1b2wh1 d1e4wl1 d1jnl11 d1yedb1 d1za6b1 d3u7aa\_  
d1igfh1 d3gnml1 d1orsa1 d1wejl1 d1a2ya\_ d1hxmb1 d1gafh1 d2j4wh1  
d1pz5a1 d1j05a\_ d1a3rh1 d4fq1l1 d1qfwh\_ d1eo8h1 d1n7mh1 d4s11a\_  
d1kegh1 d5da4a\_ d1iqwl1 d3whxb1 d1vgeh1 d1deeb1 d1c12b1 d1t2ql1  
d1ad9a1 d3gsnb1 d3b2uc1 d1ggbh1 d1t3fb1 d1nak11 d4ocmc\_ d1lila1  
d2v7hb3 d2esve1 d1mcoh1 d2qr0b1 d2q3aa\_ d1ct8a1 d1kcrl1 d2pxyb\_  
d2uzih\_ d5c3ld\_ d3durb\_ d1c5c11 d2ak4e1 d1d17h\_ d1xiwd\_ d1mlba1  
d1rmfl1 d1i7zb1 d1dlfl\_ d2xa3a\_ d5bq7b1 d1dqqb1 d3h42l1 d1legjh1  
d1kcvl1 d1fe8l1 d2j6el1 d1f3rb2 d1lk3l1 d1sm3h1 d1q0xh1 d1ghfh1  
d7fabl1 d1igch1 d1l00h1 d4idla\_ d5c2b1\_ d1jrh11 d1l1la1 d3zhda1  
d4kfcz\_ d1b0wa\_ d1e6oh1 d1mexl1 d4krpb\_ d1fnsh1 d1ncwh1 d4hgma\_  
d4eigb1 d4rzca\_ d2mpal1 d4y5xa\_ d5en2b1 d3lrga1 d4ej1c1 d1rhha1  
d1j05b\_ d1forh1 d1q9wb1 d2wzpd\_ d2aq2a1 d1h0da1 d3revb1 d2ij0c1  
d1tzh1 d4m7jl1 d1k6ql1 d3b9kc1 d1igml\_ d3qeua1 d1dsfl\_ d1celh1  
d1kcu1 d1zvha1 d1zvoa1 d1tqbb1 d1ay1l1 d2qsc11 d2cgrh1 d1n10h1  
d1ken11 d3eo0a1 d4n9ob1 d1n0xl1 d3k1kc\_ d2aq2b1 d1ck1a1 d1enf1  
d1i4pa1 d1v1oa1 d1et9a1 d1esfa1 d2g9hd1 d4ohja1 d1klud1 d1bxta1  
d1eu3a1 d1ty0a1 d1fnua1 d2cqva1 d1fhga\_ d2k1ma\_ d2d12a1 d1biha3  
d1biha1 d1biha4 d3qp3a1 d1g1ca\_ d1gxea\_ d1cvsc2 d1cvsc1 d1xmwa2  
d1m4ka2 d2otpa2 d1biha2 d1rhfa2 d2fcba2 d2fcba1 d1gsma2 d1lepfa1  
d1lepfa2 d2dava1 d1waaa\_ d1f97a2 d1x44a1 d1vcaa2 d1fnla2 d1fnla1  
d3b5ha2 d3h8na2 d3h8na1 d1jbja1 d1jbja2 d1pd6a\_ d1f2qa2 d1f2qa1  
d3cx2a\_ d1nbqa2 d3b5ha1 d1n26a1 d1xiwb\_ d1xaua\_ d1fltx\_ d2ifga1  
d1olla1 d1olla2 d1cs6a4 d1cs6a3 d1cs6a2 d1cs6a1 d2gw5a2 d1sy6a1  
d1xiwa\_ d1lucta2 d1lucta1 d1ry7b2 d1gl4b\_ d1qz1a3 d1olza1 d2c9aa1  
d1wwca\_

**Family-91 (d.81.1.1)**

**Positive dataset contains 9 protein sequences.**

d2q49a2 d2g17a2 d2cvoa2 d2czca1 d3pwka2 dlzyao2 d2pkqo2 d2hjsa2  
d1vkna2

**Negative dataset contains 4014 protein sequences.**

d1m32a\_ d1libja\_ d1c7na\_ d1liuga\_ d4q75a\_ d2bkwa1 d1t3ia\_ d1n8pa\_  
d1qz9a\_ d1jff9a\_ d1leg5a\_ d1p3wa\_ d3kgwa\_ d1c11a\_ d2ctza1 d1vjoa\_  
d2rfva\_ d1gc0a\_ d1cs1a\_ d1d2fa\_ d2ch1a1 d1qgna\_ d1pffa\_ d1ax4a\_  
d2v1pa1 d2ez1a\_ d1u08a\_ d1lc5a\_ d1b5pa\_ d2ay1a\_ d1bw0a\_ d3pd6a\_  
d7aata\_ d2csta\_ d1j32a\_ d1fg7a\_ d4wlha\_ d1o4sa\_ d1v2da\_ d1gdea\_  
d1m6sa\_ d1v72a1 d1svva\_ d1ajsa\_ d1wsta1 d2f8ja2 d1lk9a\_ d1vp4a1  
d1xi9a1 d2gb3a1 d3i2ka1 d1mpxa2 d1xkta1 d2hfka\_ d5d3ka\_ d1tq5a1  
d1g8fa3 d1ddla\_ d1e57b\_ d1auyb\_ d1f56a\_ d1bypa\_ d1azca\_ d1ws8a\_  
d3u25a\_ d1cuoa\_ d1id2a\_ d1rkra\_ d2iaac\_ d4dp1x\_ d1nwpa\_ d2gima\_  
d2i7sa\_ d1qhqa\_ d3ehbb1 d1fftb1 d1gyca3 d1hfua2 d1kbva1 d1kbva2  
d1sdda1 d1sdda2 d1gyca1 d1gyca2 d1mzya1 d2bw4a1 d1aoza1 d1aoza3  
d1aoza2 d1kyaa2 d1kyaa3 d1kyaa1 d1mzya2 d4e9sa1 d1sddb1 d1sddb2  
d1hfua1 d1hfua3 d1oe1a2 d1oe1a1 d1v10a2 d1v10a3 d1v10a1 d2dara2  
d2dara1 d1wyha2 d2dloa2 d1rutx4 d1rutx3 d2cuqa2 d1x41a2 d1x41a1  
d1x3ha2 d1x3ha1 d2d8za1 d1x61a2 d1x6aa1 d1x6aa2 d2cora2 d2cora1  
d1v6ga1 d1v6ga2 d2d8za2 d1x64a1 d1x64a2 d1b8ta1 d2co8a1 d1x63a2  
d2dj7a2 d2dj7a1 d2cu8a2 d2cu8a1 d1g47a2 d1g47a1 d1j2oa1 d1wyha1  
d2dloa1 d1wiga1 d1wiga2 d2cupa2 d2cupa3 d1x68a1 d2d8ya2 d2d8ya1  
d1m3va2 d1x62a1 d1x68a2 d1x61a1 d1b8ta3 d1b8ta2 d2d8xa2 d2d8xa1  
d1x4ka1 d1x4ka2 d2cuqa1 d1m3va1 d2co8a2 d1j2oa2 d1x63a1 d2cura1  
d2cura2 d1x62a2 d2cfba1 d1o69a\_ d1bj4a\_ d3k28a\_ d2bwpa\_ d3lg0a\_  
d2fnua\_ d3ou5a\_ d1z7da1 d1b9ha\_ d1iaya\_ d4msoa\_ d1bs0a\_ d1s0aa\_  
d1sffa\_ d3tqxa\_ d1mdoa\_ d3qboa\_ d3pgya\_ d1bjna\_ d2dkja\_ d1ejia\_  
d1vefa1 d4wxga\_ d3bs8a\_ d3gbxa1 d1w23a\_ g1gk9.1 g1cp9.1 g1e3a.1  
d3sxwa1 d4luka\_ d2bema\_ d1pama1 d1lea9c1 d1qhoa1 d2fhfa2 d2fhfa1  
d1k3ia1 d1j0ha1 d1cxl1a1 d2bhua1 d1edqa1 d1f1sa2 d1ut9a2 d1txka1  
d1zx5a1 d2phla2 d2phla1 d1fxza2 d1fxza1 d1lrha\_ d1uija1 g1dgw.1  
d2v09a\_ d1uika2 d1uika1 d1dgwa\_ d2pa7a1 d1wlta1 d1nxma\_ d2c0za1  
d1ds6b\_ d1fstb\_ d1ex0a1 d1g0da1 d4alac\_ d1pjwa\_ d1rera1 d1s6na\_  
d3uzqb\_ d1tafa\_ d1bh9b\_ d1tafb\_ d1q9ca\_ d1h3ob\_ d2byka1 d1n1ja\_  
d4g92b\_ d1bh9a\_ d1jffia\_ d1h3oa\_ d2bykb1 d1n1jb\_ d1cg2a1 d1yloa2  
d1y7ea2 d1y0ya3 d1l1fwa1 d1vixa1 d1fnoa4 d1vhua2 d1ysja1 d1vhea2  
d1z21a1 d2fvga2 d1vgya1 d2grea2 d1xmba1 g1q71.1 d1rtqa\_ d2ovga\_  
d1sq8a\_ d1rzsa\_ d3kz3a\_ d3orca\_ d2b5aa1 d2ofya1 d4mcxa\_ d2xi8a\_  
d2icta\_ d2bnma1 d2ppxa1 d1y7ya1 d2msya\_ d2djoa1 d2r5za\_ d1au7a1  
d1f43a\_ d2lmda1 d1akhb\_ d1s7ea1 d3nara\_ d1zq3p1 d2craa1 d1mija\_  
d4uuta\_ d3a01a\_ d1x58a1 d3rkqa1 d3cmya1 d2cqxa1 d2da6a1 d1e3oc1  
d1fjla\_ d1mh3a1 d1ig7a\_ d1x41a1 d1wh7a1 d1gt0c1 d2mw8a\_ d1x2ma1  
d1b72a\_ d1wi3a1 d1jgga\_ d1wjha1 d1x2na1 d1nmnc\_ d2cuea1 d3k2aa\_  
d2hosa\_ d2jwta2 d1pufa\_ d1oect1 d2hi3a\_ d1b8ia\_ d4j19a\_ d3lnqa\_  
d1wh5a1 d1b8ib\_ d1hcra\_ d1tc3c\_ d1gtda1 d1u78a2 d1hlva1 d1hlva2



d1iufa1 d2iu5a1 d1zk8a1 d2g7sa1 d2fd5a1 d2np5a1 d1z0xa1 d2id6a1  
d2d6ya1 d2i10a1 d1vi0a1 d2oi8a1 d3c07a1 d2ns7a1 d2fq4a1 d2yvea1  
d1t33a1 d2o7ta1 d1rcta1 d2np3b1 d2g7ga1 d2gena1 d2fbqa1 d2g7la1  
d2gfna1 d2g3ba1 d2jj7a1 d2hyja1 d1sgma1 d1ui5a1 d2hkua1 d2id3a1  
d4jyka1 d3lv8a\_ d1s3ga1 d1zaka1 d1s4qa\_ d3tvta2 d1uf9a\_ d1ckea\_  
d1osna\_ d1p5zb\_ d4tmka\_ d3cm0a\_ d1tmka\_ d1jaga\_ d3h86a\_ d1t0hb\_  
d1nn5a\_ d2h92a\_ d3kb2a1 d2c95a1 d1yj5a2 d1kgda\_ d1ly1a\_ d2ak3a1  
d1vyva2 d1deka\_ d2grja1 d1p3ja1 d1y63a\_ d1e4ya1 d1s96a\_ d3iija1  
d1lvga\_ d1nksa\_ d1vyua2 d4e22a\_ d1qf9a\_ d1jjva\_ d1q3ta\_ d1ki9a\_  
d1lw7a2 d1teva\_ d1kjwa2 d1gsia\_ d1z0ja1 d3umra2 d3gj0a1 d2gaoa1  
d1yzga1 d1x3sa1 d1g7sa4 d1puja\_ d1udxa2 d1kk1a3 d2o52a\_ d1jwyb\_  
d1zcaa2 d1zcba2 d2fv8a1 d2cjwa\_ d3dz8a1 d1xzpa2 d1vg8a\_ d4qxaa\_  
d2ew1a1 d1x1ra1 d2bcgy\_ d3doea1 d3cona\_ d3rega\_ d3wyga\_ d1upta\_  
d2b6ha1 d1zd9a1 d1lnza2 d1r5ba3 d1n0ua2 d1r2qa\_ d2f91a1 d2rhda\_  
d3q3jb\_ d3q85a\_ d1efma1 d1r8qa\_ d2gf9a1 d2akab1 d1ek0a\_ d1z08a1  
d2gcoa1 d2dy1a2 d4g01b\_ d2cxxa1 d1svia\_ d3q72a\_ d1ni3a1 d4ac9a4  
d2erxa1 d2bmea\_ d1wxqa1 d2gf0a1 d4ldja1 d1zunb3 d4lv5b\_ d1efca3  
d1kmqa\_ d2g6ba1 d3lrpa\_ d1tada2 d2y8ea\_ d4rd4a1 d1z06a1 d2heia\_  
d3a58b\_ d1u01a2 d1d2ea3 d1zj6a1 d2ocba\_ d3rwoa\_ d1mr3f\_ d2e9sa1  
d4u5xa1 d2iwra\_ d2fn4a1 d3bwdd\_ d2nzja1 d2atva1 d2ksqa\_ d3l43a\_  
d1mkya2 d1mkya1 d1wmsa\_ d1jnja3 d2rmka\_ d1f6ba\_ d1f60a3 d1gota2  
d1jala1 d2fh5b1 d1g16a\_ d2wblc\_ d1m7ba\_ d1wf3a1 d1f5na2 d1t9ha2  
d1z6xa1 d1z0aa1 d2fg5a1 d2a5ja1 d2bcjq2 d1s0ua3 d1ky3a\_ d4y0va\_  
d4lhwa\_ d2qmea1 d2atxa1 d1egaa1 d1ryha\_ d1moza\_ d1nrjb\_ d2erya1  
d3bfka\_ d1puia\_ d1fzqa\_ d3j3az1 d3t5ga\_ d1shza2 d3defa\_ d2f7sa1  
d3raba\_ d3tsoa\_ d3aq4a\_ d2a17a1 d3sfva1 d3bc1a\_ d2ncda\_ d1sdma\_  
d3h4sa1 d2heha\_ d2grya\_ g3kin.1 d1kk8a2 d1br2a2 d1goja\_ d1f9va\_  
d2mysa2 d1lkxa\_ d3t0qa\_ d4db1a1 d3gbja\_ d1ry6a\_ d1v8ka\_ d1k8ka2  
d1k8ka1 d3uleb1 d3i33a2 d3i33a1 d1bupa1 d1dkgd2 d1dkgd1 d4ci6a2  
d1jcf1a1 d4a2ba2 d2fxua1 d1yaga2 d1yaga1 d4cbua2 d1bupa2 d3vrda1  
d3vrda2 d1fcdc2 d1fcdc1 d1h1oa2 d1h1oa1 d1m70a1 d1iqca2 d1liqca1  
d1eb7a2 d1eb7a1 d1nmla1 d3h3no1 d3h3no2 d3ezwa2 d1zc6a1 d1zbsa1  
d1zbsa2 d1zc6a2 d2ch5a2 d2ch5a1 d1zxo2 d1zxo1 d1hroa\_ d4gedb\_  
d3zooa\_ d1mz4a\_ d1gu2a\_ d1f1fa\_ d1dvva\_ d1c6ra\_ d1c75a\_ d1e29a\_  
d1gdva\_ d1cnoa\_ d1h32b\_ d1co6a\_ d2bh4x\_ d2aiua\_ d5cytr\_ d1jdl1a\_  
d1i8oa\_ d2zboa\_ d3dmia\_ d1ls9a\_ d1wvec\_ d2yk3a\_ d3ph2b\_ d1dw0a\_  
d5aura\_ d1ql3a\_ d1qn2a\_ d1f1ca\_ d2nqya\_ d1h4ga\_ d1hixa\_ d1oa2a\_  
d1olra\_ d3b7ma\_ d4h7ma1 d3wp3a\_ d2vgda\_ d1ligoa\_ d3zsea\_ d2nlra\_  
d3wx5a\_ d1oa3a\_ d1pvxa\_ d1m4wa\_ d1f5ja\_ d1oa4a\_ d1ks5a\_ d4ix1a1  
d1evsa\_ d1cnt1\_ d1pvhb\_ d1z7ca\_ d1huwa\_ d1bgea\_ d1f6fa\_ d1f45b\_  
d1l1rb\_ d1axia\_ d1letea\_ d3tgxb\_ d2z3qa1 d3qb1a\_ d1hula\_ d1m48a\_  
d4nkqb\_ d1eera\_ d1v7mv\_ d5e4ea\_ d2o27a\_ d3b5ka\_ d2psma1 d4zf7a\_  
d3uf5a\_ d4x51a\_ d1d9ca\_ d4ypgc1 d3oq3a\_ d1lqsl\_ d1n1fa\_ d1lau1a\_  
d1wu3i\_ d3bes1\_ d3ux9a\_ d3rbaa\_ d2qtra\_ d1nupa\_ d3l92a\_ d1f9aa\_

d1qjca\_ d2h29a\_ d1vlha\_ d1lod6a\_ d1lw7a1 d1mrza2 d4ruka\_ d3wdpp1  
d3wq5a\_ d1gnxa\_ d4gxpa\_ d4hz8a\_ d1e4mm\_ d3aiua\_ d1wcca1 d1qvba\_  
d3ahxa\_ d1v02a\_ d2dgaa\_ d1pbga\_ d1vffa1 d1qoxa\_ d4ha4a\_ d2e17a\_  
d1liq0a2 d1irxa2 d1r6ta2 d1ivsa4 d2cyba\_ d1rqga2 d1j09a2 d2yxna\_  
d1f7ua2 d1h3fa1 d1ffya3 d2g36a1 d1nzja\_ d1n3la\_ d1i6la\_ d1pfva2  
d1h3na3 d3n9ia\_ d3sz3a1 d3sw2a\_ d1moxc\_ d1dx5i3 d1edmb\_ d1autl2  
d1autl1 d1nqlb\_ d1dva11 d1szba2 d1kigl\_ d2y5fl\_ d1ijqa2 d1gk5a\_  
d1g1sa2 d1nt0a3 d1lmja2 d1lmja1 d1nzia2 d2wphe\_ d1klil\_ d1pfxl2  
d1pfxl1 d1p9ja\_ d1g1ta2 d1f7ea\_ d4yzub\_ d1lr7a1 d2mgpa1 d1b9wa1  
d2mgpa2 d1ob1c1 d1ob1c2 d1n1ia2 d1n1ia1 d2npra2 d2npra1 d1m1xb5  
d2y5ia\_ d1qlsa\_ d1psra\_ d3n22a\_ d2egda\_ d4ggfc\_ d2wcea\_ d2luca\_  
d4aqia\_ d3nsia\_ d2lp3a\_ d1j55a\_ d1a4pa\_ d1k8ua\_ d1nsha\_ d1pvaa\_  
d3fs7a\_ d2pvba\_ d1ttxa\_ d1rwy\_ d2kyfa\_ d1rk9a\_ d1exra\_ d1tiza1  
d1nyaa\_ d1g8ia\_ d1wdcc\_ d3fwba\_ d1ggza\_ d2o5ga\_ d1ctaa\_ d1m45a\_  
d3i5gc\_ d1sl8a\_ d1fpwa\_ d2scpa\_ d2roaa\_ d4aqra\_ d3pn7b\_ d1br1b\_  
d2mysb\_ d1s6ca\_ d1bjfa\_ d2obha\_ d1jfk\_ d1jf0a\_ d1qv0a\_ d1lkja\_  
d2mlfc\_ d2m97a\_ d2d8na\_ d4by5a\_ d1jbaa\_ d4nqga\_ d1wdcb\_ d2mysc\_  
d1j7qa\_ d1s6ia\_ d1uhka2 d1r2ua\_ d1dtla\_ d3kf9a\_ d3pn7c\_ d1fi6a\_  
d1c07a\_ d5d67d\_ d1tuza\_ d1h8ba\_ d1eg3a1 d1eg3a2 d2zkmx1 d1snla\_  
d1gjya\_ d1ylxa\_ d1hqva\_ d1dvia\_ d1df0a1 d1qxp2\_ d4usla\_ d1k94a\_  
d1sfsa\_ d1jfxa\_ d1wkya2 d1uuqa\_ d3wh9a\_ d4mlra\_ d1xyza\_ d4xuya\_  
d2je8a5 d4bf7a1 d3cuia\_ d1ur4a\_ d1qw9a2 d1odza\_ d2vzsa5 d1bqca\_  
d2x2ya1 d1qnra\_ d4y7ea1 d1vjza\_ d4k68a\_ d2v3ga\_ d4hpga\_ d1nofa2  
d1nq6a\_ d1h4pa\_ d1aq0a\_ d3ziza\_ d4bs0a\_ d1ecea\_ d1h1na\_ d1ta3b\_  
d1w91a2 d1ilwa\_ d1uhva2 d1us3a2 d1legza\_ d7a3ha\_ d1tvna1 d3nyda1  
d1ghsa\_ d2cyga1 d4xv0a\_ d2c8na2 d1w32a\_ d3emca\_ d1v6ya1 d1foba\_  
d2uwfa1 d2fgla\_ d3niya1 d2c0ha1 d1rh9a1 d1yq2a5 d1szna2 d1fa2a\_  
d1pama4 d5do8a1 d1ea9c3 d1hx0a2 d2fhfa5 d1qhoa4 d1avaa2 d1m53a2  
d4m8ua1 d2gjpa2 d1lwha2 d4howa1 d1ktba2 d1j0ha3 d3vm5a1 d2x1ia\_  
d1wzaa2 d1uasa2 d2diea1 d1mxga2 d1ht6a2 d1eswa\_ d5cpsa\_ d1ud2a2  
d1zjaa1 d3gbea1 d1kwga2 d1wdpa\_ d1gcya2 d1g5aa2 d1hvxa2 d3dhp2  
d2bhua3 d4do4a1 d3qgva1 d1e43a2 d1g94a2 d2d3na2 d1gjwa2 d1gvia3  
d1x1na1 d1r7aa2 d1tz7a1 glapy.1 d3ljqa\_ d4toqa\_ d1wb0a1 d1w9pa1  
d1eoka\_ d1itxa1 d1kfwa1 d1goia2 d2gsja\_ d1hjxa1 d1jnda1 d1vf8a1  
d1etob\_ d1umqa\_ d1mixa2 d1e5wa2 d1j19a2 d1isna2 d2al6b2 d3syxa1  
d1mkea1 d2p8va\_ d1xoda1 d1i7aa\_ d1evha\_ d1qc6a\_ d1lid1a\_ d2hmta\_  
d1b9ra\_ d1offa\_ d1frra\_ d3wcqa\_ d1e9ma\_ d1l5pa\_ d1lwria\_ d1i7ha\_  
d3av8a\_ d1czpa\_ d1rfka\_ d3p1ma1 d3b2ga\_ d2bt6a2 d1wgqa1 d1v89a1  
d2coda1 d1zc3b\_ d1wg7a1 d1u5ea1 d1v61a1 d2coca1 d2ys1a1 d1v5pa1  
d1nty2\_ d1wjma1 d1wi1a1 d1u29a\_ d1xx0a1 d1unqa\_ d2zkmx3 d1fhoa\_  
d1v88a1 d2adza1 d1x1fa1 d1p6sa\_ d2coaa1 d1btka\_ d1v5ma1 d2x18a\_  
d1dyna\_ d1x1ga1 d4kaxb\_ d2j59m1 d1ki1b2 d1xcga2 d1txda2 d1u5da1  
d1dbha2 d1wlha\_ d1upqa\_ d1v5ua1 d1foea2 d2fjla1 d1eaza\_ d2dfka2  
d2cofa1 d1kz7a2 d9ldta1 d2ewda3 d1up7a1 d2dfda1 d1s6ya1 d1vjta1

d7mdha1 d1hyea1 d1t2da1 d1ojsa3 d1b8pa1 d1ldna1 d1hyha1 d1civa1  
d2a92a1 d1ez4a1 d1i0za1 d1y6ja1 d1gv0a1 d1ur5a1 d1l1da1 d1lobba1  
d1v8ba1 d1gdha1 d2dlda1 d1mx3a1 d1ygya1 d1qp8a1 d1li4a1 d1j4aa1  
d2naca1 d1npya1 d3t4ea2 d1a4ia1 d1o0sa1 d2hk9a2 d2egga2 d1b26a1  
d1bvua1 d1clda1 d1leha1 d1gtma1 d1euza1 d1nvtal d3dona2 d1ledza1  
d1gpja2 d1vi2a1 d1p77a1 d1nyta1 d1b0aa1 d1vl6a1 d1v9la1 d1txga2  
d3f47a1 d1mv8a2 d2pv7a2 d1xc2a3 d2ahra2 d4xiya1 d2f1ka2 d1pgja2  
d1i36a2 d1np3a2 d1lj8a4 d1teaa3 d1qmga2 d2i76a2 d2g5ca2 d1wdka3  
d1dlja2 d3cuma3 d1kola2 d1f8fa2 d1qora2 d1jqba2 d1vj0a2 d1cdoa2  
d1gu7a2 d1d1ta2 d1xa0a2 d2dm6a2 d1jvba2 d1rjwa2 d1llua2 d1h2ba2  
d1tt7a2 d1piwa2 d1o89a2 d1liz0a2 d1e3ja2 d1yb5a2 d1uufa2 d1vj1a2  
d3gpdg1 d1vc2a1 d2nvwa1 d1u8fo1 d1ydwa1 d1hdgo1 d2g17a1 d1cf2o1  
d2czca2 d1r0ka2 d1obfo1 d2cvoa1 d1ebfa1 d1h6da1 d1i32a1 d1zh8a1  
d2q49a1 d1qkia1 d1j5pa4 d3pzra1 d1xeaa1 d1vkoa1 d1vm6a3 d3qvsal  
d2pkqo1 d1b7go1 d1gr0a1 d1p1ja1 d1lc0a1 d1j0xo1 d3pwka1 d2hjsa1  
d1zyao1 d1vkna1 d1tltal d1nvmb1 d3sjua\_ d3ojfa1 d1xu9a1 d2jjya1  
d1n7ha\_ d1ylpa1 d1h5qa\_ d1jtva\_ d4fs3a\_ d2bkaa1 d1gy8a\_ d2c5aa1  
d1ulsa\_ d1ooea\_ d2b69a1 d1y5ma1 d1spxa\_ d1aela\_ d1bxka\_ d1ydea1  
d1gega\_ d1hdoa\_ d1o5ia\_ d1e6ua\_ d1snya1 d2rhca\_ d3zv4a\_ d5ceja\_  
d2d1ya1 d1fjha\_ d3w8ea\_ d2fmua1 d1x1ta\_ d1rpna\_ d3ay7a1 d1k2wa\_  
d1eq2a\_ d2hrba1 d3ruaa\_ d2ew8a1 d4hwka\_ d1xgka\_ d2bd0a1 d1yo6a1  
d2a35a1 d2ntva\_ d1vl8a\_ d1hdca\_ d4bkua\_ d2ag5a1 d2q45a\_ d1nffa\_  
d4iy1a\_ d1zbqa1 d1kewa\_ d1ek6a\_ d1ja9a\_ d2q46a2 d1iy8a\_ d1cyda\_  
d2ptga\_ d1hxha\_ d1uzma1 d3lyla\_ d4m89a\_ d3wyea\_ d2b1la1 d1w6ua\_  
d1sb8a\_ d2q2va\_ d4nr0a\_ d1e6wa\_ d2gasa\_ d3oiga1 d2bgka1 d1mxha\_  
d1vl0a1 d1rkxa\_ d1r6da\_ d1wmaa1 d1e7wa\_ d2c07a1 d1xkqa\_ d3tzha\_  
d1g0oa\_ d3lz6a\_ d1qyca\_ d1ledoa\_ d1gz6a\_ d1oc2a\_ d1t2aa\_ d1zema1  
d2xoxa\_ d1z45a2 d1geea\_ d1p33a\_ d3lt0a\_ d4e6pa\_ d2wyua\_ d1db3a\_  
d4q9na\_ d1xhla\_ d4o1ma\_ d1fmca\_ d2uvda\_ d2gdza1 d1uaya\_ d2z1ma\_  
d2o23a2 d2fr1a2 d2fr1a1 d1qsga\_ d1qyda\_ d4zjua\_ d2a4ka1 d1ybla\_  
d1wvga1 d1yxma1 d3f4ba\_ d1mg5a\_ d1xg5a1 d2gfoa1 d1vjva\_ d2ayna1  
d3nhea\_ g1y43.1 d4ekfa\_ d2ckga\_ d1th0a\_ d2bkra\_ d1xd3a\_ d3ifwa\_  
d3u1ra1 d1g9ka2 d1kapp2 d1t3ca\_ d1lepwa3 d2a97a\_ d3fiea\_ gle1h.1  
d3ioqa\_ d1fh0a\_ d1o0ea\_ d1khqa\_ d1m6da\_ d2cb5a\_ d1cs8a\_ g8pch.1  
d1s4va\_ d2pnsa\_ d1vsna1 d1mira\_ d1iwda\_ d2oula\_ d7pcka\_ d3bwka\_  
d3bcna\_ d2p86a\_ d1pvja\_ d1pcia\_ d1gece\_ d1deua\_ d4bs6a\_ d1xkga1  
d1cqda\_ d1jqpa2 d2c0ya\_ d2bdza\_ d3p5ua\_ d2o36a\_ d1k9xa\_ d1zoya1  
d1d4ca2 d1chua2 d1jnra2 d1kf6a2 d2jk6a2 d2jk6a1 d1fecal d1fecal  
d1lpfa1 d1lpfa2 d1xhca1 d1xhca2 d1dxla2 d1dxla1 d1gera2 d1m6ia2  
d1onfa1 d1onfa2 d3lada2 d3lada1 d1w4xa1 d1w4xa2 d1gesa2 d1mo9a1  
d1xdia1 d1fl2a2 d1fl2a1 d1fcda1 d1fcda2 d1h6va2 d1h6va1 d1mo9a2  
d1gv4a2 d1gv4a1 d2gv8a2 d2gv8a1 d1aoga1 d1aoga2 d1hyua1 d1ebda1  
d1ebda2 d3dk9a1 d1q1ra2 d1q1ra1 d1gesa1 d1zbfal d2z1ha\_ d2etja1  
d3qioa1 d1j1la\_ d2e4la\_ d1j12a\_ d2lsna1 d1io2a\_ d1uaxa\_ d2yv0x\_

d1mu2a1 d1ekea\_ d1i39a\_ d1ps9a2 d1o94a2 d1lqta1 d1pn0a1 d1reoal  
d1ju2a1 d2f5va1 d3c96a1 d2gmha1 d1pj5a2 d1gpea1 d1o5wa1 d1n4wa1  
d2dw4a2 d2ivda1 d1seza1 d2voua1 d1kdga1 d1s5ja1 d2hbja2 d2igia\_  
d1wlja\_ d1qhta1 d4dlea1 d1tgoa1 d2f96a1 d3tr8a1 d3mxma\_ d1q8ia1  
d1y97a1 d1w0ha\_ d1kfsa1 d2py5a1 d1noya\_ d1d5aa1 d1yt3a3 d2guia\_  
d3mwpal d4kb1a\_ d2y8ga\_ d1xkea1 d2y8fa\_ d1iv0a\_ d1nu0a\_ d2d5ra1  
d2v76a\_ d1wj1a1 d1aqca\_ d1qqga2 d1qqga1 d1ntva\_ d1n3ha\_ d4dbba\_  
d3f0wa1 d1p3ra\_ d1wgua1 d2cy4a1 d3hqca\_ d1wvha1 d1xr0b1 d1v58a1  
d1t3ba1 d4ilfa2 d4npba2 d3nvva1 d1krha3 d2h88b1 d1n62a2 d1t3qa2  
d1kf6b2 d1zoyb1 d1ffva2 d1dgja2 d1rm6c2 d1r7ha\_ d1faaa\_ d1wika1  
d1xfla\_ d1ttza1 d2f51a1 d1ti3a\_ d1nhoa\_ d1sena\_ d2i4aa\_ d1ep7a\_  
d1zmaa1 d1fo5a\_ d3lefa1 d3diea1 d2yana1 d1z6na1 d1oaza\_ d3zywa1  
d4aj8a\_ d1nm3a1 d4fiwa\_ d1wmja\_ d4hs1a1 d1iloa\_ d1xwaa1 d1wjka1  
d2vmla\_ d1fb6a\_ d1gh2a\_ d1h75a\_ d1nw2a\_ d1kx5b\_ d3a6na\_ d4m6ba2  
d2nqbd\_ d3wkjd\_ d2yfwe\_ d4h9na\_ d5bnxa\_ d1kx5c\_ d3r45a\_ d1eqzb\_  
d4jjnb\_ d1f66c\_ d1eqza\_ d4wnnb\_ d1kx5a\_ d1u35c1 d1id3a\_ d2nqbc\_  
d1kx5d\_ d1ku5a\_ d1b67a\_ d2b5ea2 d2b5ea3 d2b5ea1 d2b5ea4 d2kp1a1  
d2kp2a1 d1hyua3 d1hyua4 d1j08a1 d1j08a2 d1pd212 d1nhya2 d2a2ra2  
d1k0dd2 d1f2ea2 d1gsua2 d1f3ba2 d2fhea2 d2pvqa1 d1tw9a2 d1oyja2  
d1e6ba2 d1k0ma2 d3ik7a1 d4is0a1 d1r5aa2 d1j1va2 d1m0ua2 d3gtub2  
d1z9ha2 d1okta2 d1axda2 d2gsra2 d1tu7a2 d1k3ya2 d1zgma1 d1b48a2  
d1gnwa2 d1gwca2 d2gsta2 d1glqa2 d1oe8a2 d1pn9a2 d1v2aa2 d1fw1a2  
d1duga2 d3zxha\_ d1cgla\_ d1rm8a\_ d1leaka2 d2jsda\_ d1cxva\_ d1hv5a\_  
d1i76a\_ d1lig8a1 d1czan2 d1czan3 d1czan1 d1lig8a2 d1bg3a4 d1bg3a3  
d1bg3a2 d1bg3a1 d3h1jd1 d1qusa\_ d3wyha\_ d4g9sa1 d3gxra\_ d1gd6a\_  
d1f6ra\_ d1livma\_ d2gv0a\_ d1iiza\_ d2z2fa\_ d1j8xa\_ d1ghla\_ d1b9oa\_  
d1741a\_ d1691a\_ d2o4wa\_ d1p37a\_ d1k28a3 d1xjta1 d1jtma\_ d2f2qa\_  
d4e97a1 d1iyka2 d1rxta1 d1iica2 d1iica1 d1f74a\_ d3l21a\_ d2e1da\_  
d1to3a1 d1w3ia\_ d1sfla\_ d1n7ka\_ d1vcva1 d4imea\_ d1wa3a\_ d2ocza1  
d1f2ja\_ d3m16a\_ d2yxga\_ d1ub3a\_ d3a5fa\_ d1fbaa\_ d1l6wa\_ d1xfba1  
d1wx0a1 d1vpxa1 d1ojxa\_ d1mxsa\_ d2a4aa1 d1xkya1 d3cq0a1 d3s1xa\_  
d1f05a\_ d1fdja\_ d3cpra1 d4d2ja\_ d1w5qa\_ d2c1ha\_ d1ohla\_ d1l6sa\_  
d1qsta\_ d2beia1 d4m3sa\_ d1u6ma1 d1ygha\_ d1yk3a1 d3dr6a\_ d1xmta\_  
d1z4ea1 d2ge3a1 d1bo4a\_ d2fiaa1 d2jdca1 d1y9wa1 d3to7a\_ d1wwza1  
d2f14a1 d2ozua1 d2b5ga\_ d2cy2a1 d2p0wa\_ d1cm0a\_ d4pswa\_ d1yreal  
d1yr0a1 d1m4ia\_ d2gana1 d1yvka1 d1ghea\_ d2g3aa1 d1y7ra1 d2euia1  
d1q2ya\_ d2fsra1 d1xeba\_ d2ae6a1 d1cjwa\_ d1qsma\_ d2aj6a1 d1y9ka1  
d1i12a\_ d1vkca\_ d2atra1 d1n71a\_ d2d4pa1 d2fiwa1 d2fe7a1 d1tiqa1  
d2ou2a\_ d1yx0a1 d2fcka1 d2j8ma\_ d2pq8a\_ d1z4ra1 d1s3za1 d1ufha\_  
d2hqya1 d2hqya2 d1lrza2 d1lrza3 d1ne9a2 d1xvqa1 d1pn0a2 d3hy2a\_  
d2cvba1 d1o8xa\_ d1lu4a\_ d1we0a1 d2bmxal d2a4va1 d1psqa\_ d1xiya1  
d1q98a\_ d1n8ja\_ d1zofa1 d2ggta\_ d3tjja\_ d4je1a1 d1o73a\_ d3s9fa\_  
d2zcta\_ d1qmva\_ d1jfua\_ d2b1ka\_ d5dvba1 d2b5xa1 d2v2ga\_ d3tb2a\_  
d4llra\_ d4fh8a1 d1e2ya\_ d1knga\_ d2h30a\_ d1i5ga\_ d2z9sa\_ d2f8aa1

d1tp9a1 d2b7ka\_ d1nm3a2 d3hvva\_ d2wfca1 d4kcea\_ d1xvwa1 d4gqca1  
d3qpma\_ d4k1fa\_ d1zzoa1 d1gpla\_ d1prxa\_ d1zsqal d3kasa1 d3bila3  
d4aw8a\_ d1ogpa1 d1lgya\_ d4l3wa\_ d1llfa\_ d1gz7a\_ d1lukca\_ d3groa\_  
d1pjaa\_ d1thta\_ d3ia2a\_ d1a88a\_ d4dgqa1 d1zoia\_ d1xwdc1 d3kj4a\_  
d1ozna\_ d1w8aa\_ d2ifga3 d1xkua\_ d1leb6a\_ d3p0ya1 d1lgra1 d1lgra2  
d1n8yc2 d1n8yc1 d1m6ba1 d3gv5b1 d1t94a2 d3bq0a2 d1h6ua2 d1cixa\_  
d1y29a\_ d1v7fa\_ d2jtba\_ d1d1ha\_ d1g9pa\_ d1lupa\_ d1qk7a\_ d1mb6a\_  
d2a2va\_ d1niya\_ d1i25a\_ d1hvwa\_ d2mpqa\_ d1ie6a\_ d1la4a\_ d2mxoa1  
d1d10a\_ d1koza\_ d1qk6a\_ d1emxa\_ d1lqra\_ d1c6wa\_ d1f15b\_ d1za7a\_  
d1laja\_ d1rypd\_ d1irua\_ d1rypc\_ d3unfk\_ d1rypa\_ d1j2pa\_ d1lirui\_  
d1j2qh\_ d3unfh\_ d1m4ya\_ d1rypb\_ d1lirul\_ d1lirug\_ d1liru2\_ d1q5rh\_  
d1rypg\_ d1g3ka\_ d1liruf\_ d1q5qa\_ d1e94a\_ d1lirub\_ d1ryph\_ d3ty6a\_  
d1liruj\_ d1liruk\_ d1rype\_ d1lirud\_ d1lirue\_ d3mi01\_ d1rypf\_ d1liruh\_  
d2z3ba\_ d1liruc\_ d3mka2\_ d1liru1\_ d1ny721 d1ny722 d1a6ca3 d1a6ca2  
d1a6ca1 d1pgl22 d1pgl21 d1pgl11 d1mqta\_ d1d4m3\_ d1fmd3\_ d2mev1\_  
g1aym.1 d1evl3\_ d4q4w1\_ d1r1a3\_ d2x5ia\_ d1rhi1\_ g1r1a.1 g1d4m.1  
g1rhi.1 d1b35b\_ d1loopa\_ d1tme1\_ d4iv1a\_ g1pvc.1 g1fpn.1 d1fpn1\_  
d4gb31\_ d1d4m1\_ d1fmd1\_ d1evl1\_ d2wzr3\_ g1cov.1 d1qqp3\_ g1fmd.1  
d2x5ic\_ d1rhi3\_ g1oop.1 d1hxs1\_ g1hxs.1 d1fpn3\_ d1bev1\_ g2mev.1  
d1eah3\_ d1aym1\_ d1pvc3\_ d1qqp1\_ d1zba3\_ d1h8ta\_ d3vbhc\_ g1b35.1  
g1bev.1 d1hxs3\_ g1evl.1 d1bev3\_ g1tmf.1 d1tmf1\_ d1b35a\_ d2mev3\_  
g1eah.1 d1eah1\_ d4q4w3\_ d1r1a1\_ d1aym3\_ d1pvc1\_ d1zba1\_ d1h8tc\_  
d1loopc\_ d1tme3\_ g1qqp.1 d4iv1c\_ g1tme.1 d3ubub\_ d1legia\_ d1qo3c\_  
d1v7pa\_ d1tdqb\_ d3ubua\_ d1c3ab\_ d1h8ua\_ d3bx4b\_ d1t8ca1 d1sb2a1  
d1qdda\_ d2ziba1\_ d3cada\_ d1byfa\_ d1j34b\_ d1jwia\_ d1jzna\_ d1c3aa\_  
d1oz7b\_ d1wmza\_ d3bdwb\_ d1hq8a\_ d1fifa1\_ d1dv8a\_ d3hupa\_ d1wk1a1  
d1umra\_ d2afpa\_ d3bx4a\_ d1gz2a\_ d1sl6a\_ d1v7pb\_ d3g8ka\_ d1lixa\_  
d1j34a\_ d1jwib\_ d1g1sa1\_ d1y17a1\_ d1ja3a\_ d1fvub\_ d3bdwa\_ d1sb2b1  
d1fvua\_ d1oz7a\_ d4m17a\_ d3cfwa1\_ d1ypqa1\_ d1g1ta1\_ d3fd4a\_ d3l9jc\_  
d4dn8a1\_ d1v4lb\_ d1rdl1\_ d2msba\_ d1eixa\_ d3exra\_ d2ffca1\_ d2fdsa1  
d3n3ma1\_ d2czda\_ d2yyua\_ d1vqta1\_ d1dbta\_ d3ldva1\_ d2r80b\_ d1cqxa1  
d1cg5a\_ d3boma\_ d2h8fb\_ d2raoa\_ d3bj1a\_ d4hrrb\_ d2r50a\_ d3d1kb\_  
d2aa1b1\_ d3zhwa\_ d3hf4b\_ d3gdja\_ d1jebb\_ d3bj1b\_ d1x9fb\_ d1wmub\_  
d1gcva\_ d3bcqb\_ d3d4xb\_ d1gvha1\_ d2dc3a\_ d3hf4a\_ d4yu3a\_ d3k8ba\_  
d1qpwb\_ d2r80a\_ d3bcqa\_ d1v4wa\_ d3wtgb\_ d1j17a\_ d4esaa\_ d1a9we\_  
d3d1ab\_ d1fsla\_ d4h21a\_ d1v4wb\_ d1mwca\_ d1vhba\_ d1jeba\_ d1spgb\_  
d1h97a\_ d1q1fa\_ d1tu9a1\_ d3d1aa\_ d1hdsb\_ d3hyub\_ d2zffb\_ d3fs4a\_  
d1oj6a\_ d1shrb\_ d4h21b\_ d4yu3b\_ d1spga\_ d3hrwa\_ d3qqra\_ d3at5a\_  
d4wchd\_ d3hyua\_ d1cg5b\_ d1uc3a\_ d1hbra\_ d2raob\_ d1outb\_ d4esab\_  
d3gdjb\_ d3qqqa\_ d1x9fc\_ d3vrfa\_ d1litha\_ d3mkba\_ d3d4xa\_ d3mjpa\_  
d1j16a\_ d3fh9a\_ d1outa\_ d2dc3b\_ d1lit2a\_ d3eoka\_ d3g46a\_ d1qpwa\_  
d3vrfb\_ d1ch4a\_ d1x9fd\_ d1hdsa\_ d2zfb\_ d3mkbb\_ d1or4a\_ d3wtga\_  
d1a4fa\_ d3fh9b\_ d3bomb\_ d3cy5a\_ d3at5b\_ d1x9fa\_ d2oifa\_ d4lmbx\_  
d1cpcb\_ d3v57a\_ d1kn1a\_ d1cpc\_ d4f0ta\_ d2vjha\_ d4po5b\_ d1eyxa\_

d1alla\_ d4f0tb\_ d1b33b\_ d1b8db\_ d4h0mb\_ d1b33a\_ d2vjhb\_ d4lm6b\_  
d2vmlb\_ d1allb\_ d2vjta\_ d3dbja\_ d2vmla\_ d2vjtb\_ d4f0ub\_ d1f99b\_  
d4rmpa1 d1liaa\_ d1eyxb\_ d2uulb\_ d4lmsb\_ d4f0ua\_ d2bv8a\_ d1f99a\_  
d2bv8b\_ d2c71b\_ d3dbjb\_ d4rmpb1 d4h0ma\_ d3v57b\_ d1kn1b\_ d1liab\_  
d2uula\_ d2j96a\_ d1mtza\_ d2xqfa\_ d1ea5a\_ d1f6wa\_ d1dx4a\_ d1qe3a\_  
d1k4ya\_ d4qwwa\_ d2ha2a\_ d3c8da2 d2pbla1 d1jkma\_ d1jjia\_ d1lzla\_  
d1jjfa\_ d2i49a\_ d1nnfa\_ d1xvxa\_ d1ursa\_ d1h3da1 d1iuda\_ d4m1va1  
d1twya\_ d3e13x\_ d2nxoa1 d4pfua\_ d3ttma\_ d1elja\_ d2qmwa1 d1us5a\_  
d1y3na1 d1jeta\_ d1uqwa\_ d4f19a1 d2esna2 d3thia\_ d3fasa1 d2uyeb\_  
d2xwva1 d1r91a\_ d2fyia1 d1pb7a\_ d2ozza1 d1sw5a\_ d1nh8a1 d1vr5a1  
d2g29a\_ d1xs5a\_ d3lswa\_ d2z23a\_ d3w9va\_ d3tcha\_ d1q35a\_ d1z7me1  
d3q27a\_ d1p99a\_ d1ve4a1 d2i6ea1 d4mcoa1 d4n8ya\_ d1eu8a\_ d1zbma1  
d1ixca2 d1j1na\_ d1xvya\_ d1y9ua\_ d2z22a1 d1xoca1 d4oera\_ d1wdna\_  
d5f1qa1 d1xt8a1 d1i6aa\_ d4gwoa\_ d4igta1 d1pc3a\_ d4mmpa1 d1o63a\_  
d2czla1 d2onsa2 d4mija1 d4iuua3 d4bvva\_ d5hpga\_ d3k65a\_ d1ki0a3  
d1ki0a2 d1ki0a1 d1a0ha1 d1pmla\_ d3sp8a3 d2feba1 d2m5ta\_ d1wqsa\_  
d5bpea\_ d2ipha\_ d1lvoa\_ d2bhga1 d3tnta\_ d3sjia\_ d3d23a1 d2fyqa\_  
d3tloa\_ d3zvea1 d2hrva\_ d3q3ya1 d4asha1 d4mh8a\_ d1mu2a2 d4i7ga1  
d3rp2a\_ glucy.1 d1fuja\_ d2zchp\_ d3w94a\_ d1si5h\_ d1lo6a\_ g2pka.1  
d1cgha\_ d1kigh\_ d1a5ia\_ d3s9ba\_ d1hj8a\_ d1ao5a\_ d2anya\_ d1q3xa1  
d1gvza\_ d1azza\_ d4gsoa\_ d2f91a1 d1iaua\_ d1gdna\_ d1eufa\_ glfiw.1  
d1eq9a\_ d4nfea\_ d2rdla\_ d1spja\_ d1elva1 d1a7sa\_ d1ekbb\_ d1pfxc\_  
d1yc0a\_ d2aiqa\_ glfiz.1 d1fi8a\_ d4k60a\_ d4dgja\_ d1mzaa\_ d1lop0a\_  
d3tjva\_ d1pytd\_ d1sgfg\_ glgg6.1 d2eeka\_ glrtf.1 d1a0ja\_ d3g01a\_  
d1pytc\_ d4e7na\_ d1ddja\_ d1z8ga1 d2hlca\_ d1npma\_ d1brup\_ d1sgfa\_  
d1autc\_ g2hnt.1 g1kdq.1 d1orfa\_ d3s69a\_ d4crga\_ d1fxya\_ d1bqya\_  
d1ra6a\_ d1muka\_ d3gsza\_ d1khva\_ d1te9a\_ d2xwha\_ d3uqsa\_ d3hkwa\_  
d3n6ma\_ d2cjqa\_ d2xyma\_ d1teba\_ d1te8a\_ d1s48a\_ d1u09a1 d4wfxa\_  
d3tyqa\_ d2pgga1 d1dzka\_ d4tlja\_ d2a2ua\_ d4wfva\_ d3t1da\_ d4iaxa\_  
d3zq3a\_ d2nnda\_ d1i4ua\_ d1kxoa\_ d1bbpa\_ d1kt7a\_ d1exsa\_ d3s26a1  
d1lf7a\_ d1qfta\_ d4gh7a\_ d1z24a1 d1qabe\_ d1xkia\_ d1lew3a\_ d3bx7a\_  
d4iawa1 d1n0sa\_ d1gkab\_ d3kzaa\_ d2k23a\_ d2l9ca1 d2joza1 d1gm6a\_  
d3kffa\_ d3saoa1 d1e5pa\_ d1yupa1 d1iiua\_ d3lgia\_ d3i77a\_ d2z9ia2  
d4nsva\_ d1lcya2 d4jcn\_ d1agja\_ d1os8a\_ d1hpga\_ d1p3ca\_ d1qtfa\_  
d1e69a\_ d1mv5a\_ d3g60a4 gl1i8.1 d1ewqa2 d1ji0a\_ d1qhla\_ d1v43a3  
d2wmfa1 d1vpla\_ d1g2912 d4a82a2 glf2t.1 d2d62a1 d3tuic1 d2bbsa1  
d3g60a3 d2ixea\_ d1g6ha\_ d1sgwa1 d2qi9c\_ d3rlfa1 d3b60a1 d3d31a2  
d2pzea1 glxew.1 d1jj7a\_ d1loxk2 d2onka1 d1wlwa\_ d1iwea\_ d1qf5a\_  
d1vmaa2 d1nija1 d1np6a\_ d2p67a1 d3ihla\_ d1okkd2 d1ls1a2 d1slma2  
d1liona\_ d2v40a\_ d1dj3a\_ d3hida\_ d2vo1a1 d2g0ta1 d1vcoa2 d1j8mf2  
d1g3qa\_ d1xjca\_ d1p9ba\_ d1qzxa3 d1ihua2 d1ihua1 d2qm8a\_ d1dj2a\_  
d4ioja\_ d1cp2a\_ d1yrba2 d1hyqa\_ d3gqba2 d1skye3 d1xp8a1 d1tf7a2  
d1tf7a1 d1ye8a1 d1skyb3 d2qe7d2 d4blta\_ d4huta\_ d3l1daa2 d4hyya\_  
d2i3ba1 d1crla\_ d3j9tb2 d3ntua2 d1vdza1 d2z43a\_ d1e9ra\_ d1nlfa\_

d3ziaa2 d1n0wa\_ d1g6oa\_ d3ziad2 d3j9ta2 d1pzna2 d3gqbb2 d1gl9b1  
d1gkub1 d1eh3a\_ d3skpa\_ d1dtza1 d1dtza2 d1ieja\_ d1jnfa2 d1ce2a1  
d1jnfa1 d1b1xa2 d1b1xa1 d1jw1a1 d1jw1a2 d1ryoa\_ d1h76a1 d1h76a2  
d1c4oa1 d2p6ra3 d2p6ra4 d1oywa2 d1oywa3 d1wrba1 d1w36b2 d1w36b1  
d1c4oa2 d3bora\_ d1t6na\_ d2eyqa5 d2eyqa3 d2eyqa2 d2zu6a2 d1veca\_  
d1uaaa1 d1w36d1 d2g9na1 d1z3ix2 d2rb4a\_ d1hv8a1 d1hv8a2 d1t5ia\_  
d1w36c2 d2j0sa2 d2j0sa1 d1fuka\_ d3hjha1 d1z5za1 d1z63a1 d1s2ma2  
d1s2ma1 d1wp9a1 d1wp9a2 d1gm5a3 d1gm5a4 d3dina4 d3dina3 d1q0ua\_  
d1w36c1 d1z3ix1 d1nkta3 d1nkta4 d1uaaa2 d1w36d2 g1qhh.1 d2fwra2  
d2fwra1 d3q3ma\_ d1za0a1 d1mxra\_ d2inca\_ d1jk0a\_ d2incb\_ d1mhyb\_  
d3hflb\_ d1r2fa\_ d2uw1a\_ d1mhyd\_ d3n37a\_ d1afra\_ d1oquc\_ d1syya\_  
d1mtyd\_ d2o1za\_ d1uzra\_ d1smsa\_ d2fkza\_ d1zujal d1s3qa1 d2fjca1  
d1z6om1 d1veia\_ d4dyya\_ d1jiga\_ d3gvya\_ d2pyba\_ d4cy9a1 d3bvfa1  
d1r03a\_ d2cf7a\_ d1nf4a\_ d1zs3a1 d4iwka\_ d3ka8a\_ d3np0x\_ d1n1qa\_  
d11b3a\_ d4e6ka\_ d1z6oa1 d2fzfa1 d4dyua\_ d3ge4a\_ d1jgca\_ d4am4a\_  
d2z6ma\_ d1ji5a\_ d1vlga\_ d1lkoa1 d1krqa\_ d3qz3a\_ d1o9ra\_ d2ffxj\_  
d1euma\_ d1yv1a1 d2v2pa\_ d1j30a\_ d4di0a\_ d1dpsa\_ d1oewa\_ d2qzxa\_  
d2asia\_ d1psoe\_ d1miqa\_ d1smra\_ d2h6ta\_ d1pfza\_ d1lizda\_ d3hd8a\_  
d1j71a\_ d1dpja\_ d4aa9a\_ d1t6ex\_ g1b5f.1 g11ya.1 g1htr.1 d1qdma2  
d1bxoa\_ d1wkra\_ d1tzsa\_ d1libqa\_ d2qzwa\_ d1bdqa\_ d3ggta\_ d3ixoa\_  
d1mrxa\_ d2haha\_ d1tw7a\_ d4njsa\_ d1sgua\_ d2p3da\_ d1nsoa\_ d3d3ta\_  
d2rkfa\_ d1c6ya\_ d2rspa\_ d3ogpa\_ d3ekwa\_ d2o4na\_ d2j9ja\_ d1baia\_  
d3ggua\_ d3lzua\_ d4npua\_ d4j55a\_ d2r8na\_ d2fxda\_ d2p3ca\_ d4dqa\_  
d3ttpa\_ d3t3ca\_ d2p3aa\_ d2hc0a\_ d2fdda\_ d3mwsa\_ d1sr9a2 d1rqba2  
d1k8rb\_ d1wgra1 d1ef5a\_ d1wfyal d1e8ya3 d1wgya1 d11fda\_ d2cs4a1  
d1wxma1 d2byea1 d3kh0a1 d2byfa1 d1wxaa1 d1h4ra3 d4yl8a1 d2a16a3  
d1wgda1 d1wga1 d4q5eb\_ d1wjna1 d1se9a\_ d3n3kb\_ d1wz0a1 d1we6a1  
d2m0xa\_ d2gbka\_ d3rt3b1 d1wh3a1 d1sifa\_ d2ekek2 d4ii2b1 d4hk2a1  
d1c3ta\_ d1m94a\_ d1wgha1 d1ttna1 d1j8ca\_ d1wx8a1 d3v6cb1 d2ma9b\_  
d4i61b1 d2jvca1 d1iyfa\_ d2k1fa\_ d1wxva1 d1wf9a1 d1t0ya\_ d2io0b2  
d1x1ma1 d2gbma\_ d1zw7a1 d2m17a\_ d1ud7a\_ d1we7a1 d21wpa\_ d2gbja\_  
d1wjua1 d1v6ea1 d1v86a1 d4eewa\_ d1wiaa1 d4icva\_ d4gu2a\_ d1wx7a1  
d1wy8a1 d4hjka1 d2faza1 d1v5oa1 d3ruib\_ d1eo6a\_ d3waob\_ d2r2qa1  
d3m95a\_ d3wana\_ d2a13a1 d2cr5a1 d1wj4a1 d1s3sg\_ d4lu0a\_ d3unda1  
d3e9aa1 d1vr6a2 d1n8fa\_ d2qkfa\_ d1d9ea\_ d1o60a\_ d2h0ba\_ d2erfa\_  
d1h30a2 d1h30a1 d3mw4a1 d1pz7a\_ d2r1ba\_ d3v64a1 d3bopa1 d3mw3a1  
d1lokqa1 d1lokqa2 d2ftba\_ d1mpa\_ d2rcqa1 d1fdqa\_ d4lkpa\_ d1sa8a\_  
d1vyfa\_ d1lpja\_ d3vg7a1 d4azqa1 d1o8va\_ d5bvqa\_ d1p6pa\_ d2qo4a\_  
d1opba\_ d1yiva1 d1o1va\_ d4bvma1 d4tkba\_ d4i3ba\_ d1bwya\_ d1ftpa\_  
d4gkca\_ d1cbia\_ d3p6da1 d1kqwa\_ d2a0aa1 d1wioa4 d1ccza2 d1vcaa1  
d1dr9a2 d1lic1a1 d2d9qb1 d2nxyb2 d1um8a\_ d1lixza\_ d1qvra2 d1qvra3  
d1qzma\_ d1sxjc2 d1jr3d2 d2p65a\_ d1l8qa2 d1g8pa\_ d3hu3a3 d1sxjd2  
d1njfa\_ d1in4a2 d1sxja2 d1tuea1 d2ce7a2 d1w5sa2 d1sxjb2 d1d2na\_  
d1ny5a2 d2gnoa2 d2a5yb3 d1fnna2 d1u0ja1 d1lv7a\_ d1iqpa2 d2fnaa2

dlixsb2 d4gita\_ dlsxje2 d1g41a\_ d1svpa\_ d1mbma\_ d3su6a1 d1cula1  
d4agka\_ d1vcpa\_ d1q31a\_ g1n11.1 d3e90b\_ d1ep5a\_ d3u1jb\_ d21j7a\_  
d1n4na\_ d2m8bb1 d2kyqa\_ d3psma\_ d1jkza\_ d1jxca\_ d2g11a\_ d1ugla\_  
d4uj0a\_ d2k4ua\_ d1hp2a\_ d2lu9a\_ d1baha\_ d2meoa1 d1wm7a\_ d1h1ya\_  
d1n8ma\_ d1jlza\_ d1wpda\_ d1c55a\_ d1pvza\_ d1wt7a\_ d1rjia\_ d1wz5a\_  
d1m2sa\_ d1pjva\_ d1c49a\_ d1qkya\_ d2ktca1 d1wmta\_ d1j5ja\_ d1rlga\_  
d1t0za\_ d2i61a\_ d1t1ta\_ d1sn4a\_ d1kv0a\_ d21kba\_ d1npia\_ d1wwna\_  
d1pe4a\_ d2kbka\_ d21i7a\_ d2kbha\_ d1dq7a\_ d1sega\_ d1omya\_ d1zywa1  
d1jzaa\_ d2jccqa\_ d1n9wa1 d1bbua1 d1e1oa1 d1c0aa1 d110wa1 d3a74a1  
d1eova1 d1iyjb4 d1iyjb5 d1o7ia\_ d4ipca1 d1x3ea\_ d4apva\_ d1jb7a1  
d1jb7a2 d1jb7a3 d3kdfa\_ d1ue1b\_ d1wjja1 d3eiva\_ d1xjva2 d1xjva1  
d2ccza2 d1se8a\_ d111oc\_ d1jb7b\_ d1qvca\_ d3ulla\_ d1qzga\_ d1miau4  
d1miau5 d1miau3 d1y14b1 d2nn6i1 d1i941\_ d2zjra2 d1smxa\_ d2qamc2  
d1hh2p1 d2r7da1 d1r12a2 d1wfga1 d3bzka4 d1x6oa2 d3a0ja\_ d2j01d2  
d2ja9a1 d4q15a\_ d1hr0w\_ d1luza\_ d2n3sa\_ d2vnud1 d1h95a\_ d1go3e1  
d2nn6h1 d1ne3a\_ d2mola\_ d1liz6a2 d1jjga\_ d1e3pa2 d2ix0a3 d2ix0a2  
d21xja\_ d1ueba3 d1ueba2 d2z0sa1 d1u01a1 d2ix0a1 d2eifa2 d2je6i1  
d3i2za1 d2c35b1 d2ahob2 d1t9ha1 d3i4oa\_ d2qall1 d1jt8a\_ d2nn6g1  
d1g6pa\_ d3cama\_ d1i94q\_ d1c9oa\_ d1d7qa\_ d2ba0a1 d2vnud2 d2vnud3  
d1khia2 d2qalq1 d1wi5a1 d1xtda2 d1ny4a\_ d1dgsa2 d1fvia1 d1ckma1  
d1x9na2 d1pfsa\_ d2a1ka\_ d1je5a\_ d1rpma\_ d2shpa1 d1yfoa\_ d1l8ka\_  
d2ooqa1 d1g4us2 d1p15a\_ d1lara2 d1lara1 d1wcha\_ d2fh7a2 d2fh7a1  
d1ohea1 d1ohea2 d2f4da\_ d1rxda\_ d2hxpa\_ d1xria\_ d1fpza\_ d3ezza\_  
d4y2ea\_ d1i9sa\_ g1f8v.1 d1novc\_ d2bbvc\_ d41bqa\_ d1a78a\_ d1slta\_  
d4no4a\_ d3zsja\_ d3duia\_ d1g86a\_ d1is3a\_ d1qmja\_ d1hlca\_ d1tdha3  
d1q3ba3 d1k82a3 g1qmo.1 g1len.1 d3zyra\_ d1fnya\_ d1n47a\_ g2ltn.1  
d1avba\_ d3usua\_ d1dhkb\_ d1f9ka\_ d1ukga\_ d1g8wa\_ d1g9fa\_ d1wbfa\_  
d3wcsa\_ d1g7ya\_ g1loe.1 d1mvqa\_ d1hq1a\_ d1v6ia\_ d1dbna\_ d1qnwa\_  
d1fx5a\_ d418qa\_ d1ioaa\_ d3n35a\_ d3ubra\_ d1d4ca1 d2k3va\_ d1ft5a\_  
d1qdba\_ d1m1qa\_ d2j7aa\_ d1h21a\_ d1ogyb\_ d4fasa\_ d1jnia\_ d1oaha\_  
d1sp3a\_ d3h33a\_ d1rwja\_ d1os6a\_ d3bxua\_ d3h4na\_ d1i77a\_ d3caoa\_  
d1j0pa\_ d2ctha\_ d1duwa\_ d1ofwa\_ d2e84a\_ d1hh5a\_ d1gyoa\_ d3h34a\_  
d1dszb\_ d3cbba\_ d1ynwa1 d1r4ia\_ d1hcqa\_ d2hana\_ d2hanb\_ d2enva1  
d1kb4b\_ d2n11b\_ d1lola\_ d1cita\_ d1adqa1 d1fnga1 d1uvqb1 d1zs8a1  
d2vola1 d2vola2 d1mfb12 d2jelh2 d1luwel2 d3qq4b1 d1kjob\_ d1k5na1  
d1osph2 d4odh12 d1ow0a1 d1ow0a2 d1bfob2 d319ra2 d3jtth1 d2fath2  
d4elkb2 d1fn4b2 d2xfxb\_ d1pg7x2 d1cqka\_ d4k71b2 d1lk2a1 d1eapb2  
d41fhg2 d1i4fa1 d2nw2a2 d1kfah2 d1mhca1 d1h3ua1 d1wejh2 d1h0db2  
d1a5fh2 d1kcvh2 d1mjuh2 d1qqda1 d1kcrh2 d1k8ia1 d3huja2 d2nnab1  
d1nfd2 d3mffb2 d1s9va1 d1lk3h2 d1q0x12 d1fv1b1 d1neza1 d4rfeb2  
d1r3ha1 d1a6tb2 d1kjva1 d1pz5b2 d1onqa1 d2bc4a2 d1de4a1 d1k8da1  
d1tcra2 d1dn0b2 d1nfde2 d2xwtb2 d1bfoa2 d1mexh2 d1iakb1 d1ypzf2  
d4f7ea2 d1q7212 d2fbjh2 d1fe8h2 d1clzh2 d1fngb1 d1uvqa1 d1vgka1  
d1c16a1 d4j12a2 d4x99b2 d1igtb3 d1je6a1 d1q72h2 d1nldh2 d1teth2



d2hmic2 d1i1ca2 d1i1ca1 d1k8ib1 d1q0yh2 d1kfa12 d3frua1 d1pg7w2  
d1u58a1 d1igyb4 d1igyb3 d1hyrc1 d1klub1 d1deeb2 d1c12b2 d2bc4b2  
d2ig2h2 d1kcvl2 d3wn5b1 d11k2b\_ d11k312 d1mjul2 d1sm3h2 d1q0xh2  
d1zvsal d1ydpal d1u8ib2 d1ypze2 d1kcuh2 d1op9a\_ d1y01a1 d1etzb1  
d1egj11 d2gsib1 d1nj9a1 d4jfh1 d1aqk11 d1t2ja\_ d11o4h1 d1zvya1  
d3v4v11 d4enec1 d1kxtb\_ d5e8ea1 d2pxya\_ d4weud\_ d1xiwc\_ d2esvd1  
d1qznh\_ d1ogae1 d1f4xh1 d4n1hb\_ d3ezjb1 d3mlw11 d1kfah1 d1etza1  
d1b4jh1 d3cfic\_ d4w68a\_ d2arja1 d1ek3a\_ d2ok011 d1vera\_ d1uwgh1  
d1blnb1 d1fpth1 d1rzga1 d2giya1 d4m3kb1 d1nc2a1 d2nyyd1 d1ncna\_  
d1fbih1 d5dxwa\_ d4fqqa1 d1dqdh1 d1jfq11 d1kelh1 d1faih1 d1frgl1  
d1fig11 d4m6n11 d1fo0a\_ d4hxb11 d3b5ga\_ d3quyd1 d2h9gb1 d1i8kb\_  
d2dd8h1 d2ck0h1 d1eaja\_ d4w6wb1 d2a6ib3 d1t66d1 d2e27h\_ d1ob1b1  
d1f11b1 d2v7na1 d1ad0a1 d2xt1b1 d1pskh1 d4i13b1 d2op411 d1a0ql1  
d1uwell d1za3a1 d1ncb11 d4uu9a\_ d1bm3h1 d1cloh1 d1nqba2 d1cf8h1  
d4y5va\_ d1mhph1 d5anma1 d4cdgc1 d4ldeb\_ d1y01b1 d2pcpb1 d1z3gl1  
d1dfb11 d1fh5h1 d3g5xa1 d1tzib1 d4dn311 d3zhka1 d2b1hh1 d2uyla1  
d1f3dh1 d1nj9b1 d2agjh1 d2h1p11 d1q72h1 d8fabb1 d1ndmb1 d1rjca1  
d4u6hb1 d3upca\_ d2fbj11 d1osph1 d1tvda\_ d2cjh\_ d4fhbd1 d1bd2d1  
d1rz7h1 d3nn8a\_ d1knoa1 d1nfda1 d2bmkb1 d1dq11\_ d1igyb1 d1igf11  
d12e8h1 d3utza1 d1nc2b1 d1rihh1 d4mwf11 d4jvpa1 d1mieh1 d1rhfa1  
d1fgn11 d1sbsh1 d1lp9e1 d1dn0a1 d4lqf11 d1iaih1 d1kgcd1 d1mh5b1  
d1gpol1 d2g60h3 d1f8t11 d2jixd1 d4grwh\_ d1fo0b\_ d1bfob1 d1axsa1  
d1u9ka\_ d1nmbh\_ d1h8na1 d1h8na2 d1jguh1 d4eura1 d3sdy11 d35c8h1  
d1w7211 d1mvub\_ d1i9rh1 d1ob1a1 d4wenb\_ d1yeeh1 d3ietc1 d1f58h1  
d1ad0b1 d1mqk1\_ d1nbvh1 d4b50a\_ d3r8bb\_ d1baf11 d1mamh1 d4rgne1  
d2gsgb\_ d35c811 d1bafh1 d1ai1h1 d2pcpa1 d2fath1 d2x1pa\_ d1orsb1  
d1ibgl1 d1shma\_ d1a2yb\_ d1u0qa\_ d2coqa\_ d1hilb1 d1qfwi\_ d1jv5b\_  
d1fn4b1 d5e0qa\_ d1nsnh1 d1plgl1 d4ocx11 d1kb5h1 d1rzhf1 d1pg7x1  
d2fx7h1 d2oi9c\_ d117i11 d3eyva1 d1d5i11 d4ffyl\_ d1tet11 d1a6wh\_  
d1ac6a\_ d3dvfa\_ d1nfdel d1mimh1 d1ri8a1 d1jhlh\_ d3dura\_ d1fskb1  
d1f97a1 d3so3b1 d2ak4d1 d1lp9f1 d4z7wf1 d117th1 d4y5ya\_ d4x7ec1  
d1emth1 d1ikf11 d1nlbh1 d4utal1 d1bjma1 d1eapb1 d1u6ah1 d2dtgd1  
d1kj2b\_ d1xeda1 d1cleh1 d1fgvh\_ d2bnub1 d2fb4h1 d2dtgb1 d1ktrh\_  
d1jpth1 d1qkz11 d4hepg\_ d2atpb1 d1flrh1 d2hrp11 d1mvfa\_ d1iaim1  
d3k80a1 d2jb5h1 d3zkxc\_ d4grwe\_ d1it9h1 d1rhhb1 d3w9ec\_ d1e4wh1  
d1sy6h1 d2j6eh1 d3qxta\_ d1jglh1 d1p7ka1 d1tzhb1 d4n8pa1 d1gaf11  
d2jelh1 d1wioa2 d4i0cc1 d1cicb1 d1lmka2 d1lmka1 d1iqwh1 d1lorqb1  
d1ejoh1 d1jnlh1 d4zga1\_ d43c9b\_ d1ggbl1 d1wejh1 d3q6fa1 d1f3dj1  
d3c6la1 d1bqlh1 d3p9wb\_ d1a3r11 d1h0db1 d2uzil\_ d1eo811 d1qfwl\_  
d1n7m11 d1igja1 d1c5ch1 d2a9mh\_ d1rmfh1 d1fj1b1 d4heme\_ d1ccza1  
d1a5fh1 d1ogad1 d1dlfh\_ d1qa9b\_ d1vgel1 d3qskb\_ d1sjxa\_ d4ozfg1  
d1sq2n\_ d1qd0a\_ d1kcvh1 d1c5db1 d3qcul1 d8faba1 d3bn9d1 d1mjuh1  
d4y8dc\_ d7fabh1 d3dvgb1 d1lo011 d1a6tb1 d1gigh1 d1kcrh1 d2hwz11  
d1yjdc1 d3clfl1 d4krna\_ d1dl71\_ d1e6o11 d1mexh1 d3r0ma\_ d4kkna\_

d1fns11 d1loaqh\_ d1rzia1 d1lucbh1 d1ncw11 d4b41a\_ d1nfd11 d2mpah1  
d2d7t11 d4grwf\_ d4b5ea\_ d11k3h1 d3u79a\_ d4u3xa\_ d1ghf11 d1bvkb\_  
d1mcww1 d1b88a\_ d1jrhh1 d32c2b1 d4wemb\_ d1dsfh\_ d1op3h1 d1ce111  
d1liqda1 d1qoka1 d1qoka2 d1qfuh1 d2crya1 d1ay1h1 d1loaq1\_ d3ab0b\_  
d1rur11 d1t4kb1 d1bz7b1 d1n0xh1 d1for11 d1lucb11 d4w6yb\_ d43c9a\_  
d2aabl1 d1tzia1 d4n1ca\_ d1k6qh1 d3g9ab\_ d4tvsa1 d1ligmh\_ d1pz5b1  
d3dx9a1 d3wxwh\_ d1nakh1 d1kcul1 d3eaka\_ d4qlra1 d1cr911 d1d9ka\_  
d1f4x11 d1deea1 d2i27n2 d1c12a1 d2orb11 d1j8hd1 d1mcp11 d1c5da1  
d1kenh1 d1bd2e1 d1h5ba\_ d4x7fc1 d3upaa\_ d1t3fa1 d1indh1 d2dtgc1  
d4hc111 d1zv5a1 d4wgvb\_ d1uwgl1 d4f37k1 d1laqkh1 d1vesa\_ d3zkqd\_  
d1fpt11 d1lo411 d1knob1 d3rrqa\_ d1ct8b1 d4orz\_ d1mlbb1 d4hgkc1  
d1dqdl1 d1bogb1 d4ozhe1 d1dr9a1 d1i7za1 d1dn0b1 d1kell1 d1rzi11  
d1ypzf1 d1wtla\_ d1hkfa\_ d1fail1 d1figh1 d2vyre\_ d1sjva\_ d1ohqa\_  
d1bfoa1 d1pkqb1 d1mjul1 d1b4j11 d1nsn11 d2arjb1 d1p4bh\_ d4aj0a\_  
d3nn8b\_ d2rcja1 d1f2xk\_ d4v1dd\_ d1ladqh1 d2eksa\_ d4k3ga\_ d1jfqh1  
d1uweh1 d1frgh1 d4gftb\_ d1uz8b1 d4n1ea\_ d1bm311 d1clol1 d3mcka1  
d2vq1a1 d1ae6h1 d4aq1b1 d1uj3b1 d1nbqa1 d1fh511 d2ck011 d2ywza\_  
d1q7211 d4nbxb\_ d1hila1 d4hz1b1 d2j8811 d1zmya1 d1cd0a\_ d1a4ka1  
d1psk11 d1a0qh1 d4krmb\_ d1ncbh1 d2fbjh1 d1j8he1 d1i3ua\_ d1cf811  
d1fe8h1 d2p1ya1 d1eeqa\_ d2x89a\_ d1o10a\_ d2r0lh1 d1ub5a1 d1dfbh1  
d3eyvb1 d4jdvb1 d4p2cg\_ d2gsia1 d2agj11 d1u3ha1 d2h1ph1 d1rih11  
d1fskc1 d1boga1 d2a7711 d1ospl1 d1qfoa\_ d3dwta\_ d2fx711 d1rz711  
d3stba1 d1pkqa1 d1b6da1 d1dzba2 d1dzba1 d1kj2a\_ d4l1ha\_ d1rzgb1  
d1dq1h\_ d12e811 d1mie11 d1jmaa\_ d1sbs11 d1fgnh1 d1f5811 d1mqkh\_  
d1ndgb1 d3qeg11 d1ia11 d2aw2a1 d1tqbc1 d3fo2a1 d4dkaa\_ d1f8th1  
d2g6011 d2ywya\_ d1uj3a1 d1yc7a\_ d3bd3a\_ d4w6xb1 d1nmb1\_ d1i8ka\_  
d1rjlb1 d1ypze1 d1p7kb1 d1kxqe\_ d1gpoh1 d2z4qa1 d1w72h1 d1i9r11  
d4qgya1 d4xt1c\_ d2qqnh1 d1cica1 d3c08h1 d2cd0a\_ d2bdnh1 d1hnga1  
d1mam11 d1nldh1 d1cr9h1 d4lcih1 d3bkyh1 d3qg711 d1ai111 d1kxvc\_  
d4iosd\_ d117ih1 d2x1qa\_ d1ub6b1 d3k74b\_ d1libgh1 d1teth1 d1igya1  
d1hxma1 d2x6ma\_ d2e71a\_ d5e03a\_ d1qfwm\_ d2r0kh1 d1igjb1 d1rurh1  
d1plgh1 d1mj8h1 d1yuhb1 d3fmg11 d1rzf11 d1emt11 d1ad9b1 d1igtb1  
d1nlb11 d1d5ih1 d3k7ua\_ d4ffyh\_ d1bwwa\_ d3dvga1 d1a6ta1 d1fgvl\_  
d4qxgl1 d1mim11 d1jh11\_ d2hffb1 d2hh011 d1qkzh1 d117t11 d1afvh1  
d1iaii1 d2cjuh\_ d1um5h1 d2ghwb2 d2ghwb1 d1kgce1 d2fgwh1 d1ikfh1  
d1dvfd\_ d2i24n1 d2xtjb\_ d1za3b1 d2yc1a\_ d2hh0h1 d2x1oa\_ d1bvka\_  
d1rjla1 d5e7ba1 d1igta1 d1i11b1 d2fb411 d1mvua\_ d1jpt11 d32c2a1  
d1fvca\_ d1liqdb1 d2hrph1 d2p4ab\_ d4qo1a\_ d1p2cb1 d1wt5c\_ d1t4ka1  
d5c1mb\_ d1it911 d1bz7a1 d1b2wh1 d1e4w11 d1jnl11 d1yedb1 d1za6b1  
d3u7aa\_ d1igfh1 d3gnm11 d1orsa1 d1wejl1 d1a2ya\_ d1hxmb1 d1gafh1  
d2j4wh1 d1pz5a1 d1j05a\_ d1a3rh1 d4fq111 d1qfwh\_ d1eo8h1 d1n7mh1  
d4s11a\_ d1kegh1 d5da4a\_ d1iqw11 d3whxb1 d1vgeh1 d1deeb1 d1c12b1  
d1t2q11 d1ad9a1 d3gsnb1 d3b2uc1 d1ggbh1 d1t3fb1 d1nak11 d4ocmc\_  
d1lila1 d2v7hb3 d2esve1 d1mcoh1 d2qr0b1 d2q3aa\_ d1ct8a1 d1kcr11

d2pxyb\_ d2uzih\_ d5c3ld\_ d3durb\_ d1c5cl1 d2ak4e1 d1d17h\_ d1xiwd\_  
d1mlba1 d1rmfl1 d1i7zb1 d1dlfl\_ d2xa3a\_ d5bq7b1 d1dqqb1 d3h42l1  
d1legjh1 d1kcvl1 d1fe8l1 d2j6e11 d1f3rb2 d1lk3l1 d1sm3h1 d1q0xh1  
d1ghfh1 d7fabl1 d1igch1 d1lo0h1 d4idla\_ d5c2bl\_ d1jrh11 d1il1a1  
d3zhda1 d4kfzc\_ d1b0wa\_ d1e6oh1 d1mexl1 d4krpb\_ d1fnsh1 d1ncwh1  
d4hgma\_ d4eigb1 d4rzca\_ d2mpa11 d4y5xa\_ d5en2b1 d3lrga1 d4ej1c1  
d1rhha1 d1j05b\_ d1forh1 d1q9wb1 d2wzpd\_ d2aq2a1 d1h0da1 d3revb1  
d2ij0c1 d1tzha1 d4m7jl1 d1k6ql1 d3b9kc1 d1igml\_ d3qeua1 d1dsfl\_  
d1celh1 d1kcu1 d1zvha1 d1zvoa1 d1tqbb1 d1ay1l1 d2qsc11 d2cgrh1  
d1n10h1 d1ken11 d3eo0a1 d4n9ob1 d1n0x11 d3k1kc\_ d1c4qa\_ d1prtc1  
d2wv6d\_ d1prtf\_ d1ltrd\_ d4l63b1 d1r4pb\_ d1prtd\_ d1tl0f\_ d2bosa\_  
d1prtb1 d2aq2b1 d1ck1a1 d1enfa1 d1i4pa1 d1vloa1 d1et9a1 d1esfa1  
d2g9hd1 d4ohja1 d1klud1 d1bxta1 d1eu3a1 d1ty0a1 d1fnua1 d2cqva1  
d1fhga\_ d2k1ma\_ d2d12a1 d1biha3 d1biha1 d1biha4 d3qp3a1 d1g1ca\_  
d1gxea\_ d1cvsc2 d1cvsc1 d1xmwa2 d1m4ka2 d2otpa2 d1biha2 d1rhfa2  
d2fcba2 d2fcba1 d1wwbx\_ d1gsma2 d1epfa1 d1epfa2 d2dava1 d1waaa\_  
d1f97a2 d1x44a1 d1vcaa2 d1fnla2 d1fnla1 d3b5ha2 d3h8na2 d3h8na1  
d1jbj1a1 d1jbj2a1 d1pd6a\_ d1f2qa2 d1f2qa1 d3cx2a\_ d1nbqa2 d3b5ha1  
d1n26a1 d1xiwb\_ d1xaua\_ d1fltx\_ d2ifga1 d1olla1 d1olla2 d1cs6a4  
d1cs6a3 d1cs6a2 d1cs6a1 d2gw5a2 d1sy6a1 d1xiwa\_ d1lucta2 d1lucta1  
d1ry7b2 d1gl4b\_ d1qz1a3 d1olza1 d2c9aa1 d1wwca\_

**Family-92 (d.92.1.11)**

**Positive dataset contains 2 protein sequences.**

d3zxha\_ d2jsda\_

**Negative dataset contains 4053 protein sequences.**

d1m32a\_ d1libja\_ d1c7na\_ d1liuga\_ d4q75a\_ d2bkwa1 d1t3ia\_ d1n8pa\_  
d1qz9a\_ d1jff9a\_ d1eg5a\_ d1p3wa\_ d3kgwa\_ d1cl1a\_ d2ctza1 d1vjoa\_  
d2rfva\_ d1gc0a\_ d1cs1a\_ d1d2fa\_ d2ch1a1 d1qgna\_ d1pffa\_ d1u08a\_  
d1lc5a\_ d1b5pa\_ d2ay1a\_ d3pd6a\_ d7aata\_ d2csta\_ d1j32a\_ d1fg7a\_  
d4wlha\_ d1o4sa\_ d1v2da\_ d1gdea\_ d1m6sa\_ d1v72a1 d1svva\_ d1ajsa\_  
d1wsta1 d2f8ja2 d1lk9a\_ d1vp4a1 d1xi9a1 d2gb3a1 d1yaaa\_ d1xkla\_  
d2wfla\_ d3i2ka1 d1lnsa3 d1mpxa2 d2cfba1 d1dfoa\_ d1o69a\_ d1bj4a\_  
d3k28a\_ d2bwpa\_ d3lg0a\_ d2fnua\_ d3ou5a\_ d1z7da1 d1b9ha\_ d1iaya\_  
d4msoa\_ d1bs0a\_ d1s0aa\_ d1sffa\_ d3tqxa\_ d1mdoa\_ d3qboa\_ d3pgya\_  
d2dkja\_ d1ejia\_ d1vefa1 d4wxga\_ d3bs8a\_ d3gbxa1 d1w23a\_ d2b5aa1  
d2ofya1 d4mcxa\_ d2xi8a\_ d2icta\_ d2bnma1 d2ppxa1 d1y7ya1 d3ljqa\_  
g1k2x.1 d3ehbb1 d1fftb1 d1gyca3 d1hfua2 d1kbva1 d1kbva2 d1sdda1  
d1sdda2 d1gyca1 d1gyca2 d1mzya1 d2bw4a1 d1aoza1 d1aoza3 d1aoza2  
d1kyaa2 d1kyaa3 d1kyaa1 d1mzya2 d4e9sa1 d1sddb1 d1sddb2 d1hfua1  
d1hfua3 d1oe1a2 d1oe1a1 d1v10a2 d1v10a3 d1v10a1 d1rypd\_ d1lirua\_  
d1rypc\_ d3unfk\_ d1rypa\_ d1j2pa\_ d1j2qh\_ d3unfh\_ d1m4ya\_ d1rypb\_  
d1lirul\_ d1lirug\_ d1liru2\_ d1q5rh\_ d1rypg\_ d1g3ka\_ d1liruf\_ d1q5qa\_  
d1e94a\_ d1lirub\_ d1lryph\_ d3ty6a\_ d1liruj\_ d1liruk\_ d1rype\_ d1lirud\_  
d1lirue\_ d3mi01\_ d1rypf\_ d1liruh\_ d2z3ba\_ d1liruc\_ d3mka2\_ d1lirul\_

d1a3qa1 dliknc\_ d3brda1 d1p7h11 dlimhc1 d1gjia1 d1zk9a1 d2cxka1  
d2h0va\_ dladqa1 d1fnga1 d1uvqb1 d1zs8a1 d2vola1 d2vola2 d1mfb12  
d2jelh2 d1uwe12 d3qq4b1 d1kjbv\_ d1k5na1 d1osph2 d4odhl2 d1ow0a1  
d1ow0a2 d1bfob2 d3l9ra2 d3jttth1 d2fath2 d4elkb2 d1fn4b2 d2xfxb\_  
d1pg7x2 d1cqka\_ d4k71b2 d1lk2a1 d1eapb2 d4lfhg2 d1i4fa1 d2nw2a2  
d1kfah2 d1mhca1 d1h3ua1 d1wejh2 d1h0db2 d1a5fh2 d1kcvh2 d1mjuh2  
d1qqda1 d1kcrh2 d1k8ia1 d3huja2 d2nnab1 d1nfd2 d3mffb2 d1s9va1  
d1lk3h2 d1q0xl2 d1fv1b1 d1neza1 d4rfeb2 d1r3ha1 d1a6tb2 d1kjva1  
d1pz5b2 d1onqa1 d2bc4a2 d1de4a1 d1k8da1 d1tcra2 d1dn0b2 d1nfde2  
d2xwtb2 d1bfoa2 d1mexh2 d1iakb1 d1ypzf2 d4f7ea2 d1q72l2 d2fbjh2  
d1fe8h2 d1clzh2 d1fngb1 d1uvqa1 d1vgka1 d1c16a1 d4j12a2 d4x99b2  
d1igtb3 d1je6a1 d1q72h2 d1nldh2 d1teth2 d2hmic2 d1l1ca2 d1l1ca1  
d1k8ib1 d1q0yh2 d1kfa12 d3frua1 d1pg7w2 d1u58a1 d1igyb4 d1igyb3  
d1hyrc1 d1klub1 d1deeb2 d1c12b2 d2bc4b2 d2ig2h2 d1kcv12 d3wn5b1  
d1lk2b\_ d1lk3l2 d1mjul2 d1sm3h2 d1q0xh2 d1zvsa1 d1ydp1 d1u8ib2  
d1ypze2 d1kcu2 d4alac\_ d1pjwa\_ d1rera1 d1s6na\_ d3uzqb\_ d2phla2  
d2phla1 d1fxza2 d1fxza1 d1lrha\_ d1uija1 g1dgw.1 d2v09a\_ d1uika2  
d1uika1 d1dgwa\_ d1ep0a\_ d2pa7a1 d1wlta1 d1nxma\_ d2c0za1 d1ktja\_  
d1fstb\_ d1v70a\_ d2f4pa1 d1yhfa1 d4w9ta\_ d1jvna1 d4x2ra1 d1ka9f\_  
d1qo2a\_ d4axka1 d1h5ya\_ d4u28a\_ d2y88a\_ d4wd0a\_ d1vzwa1 d4mh8a\_  
d1mu2a2 d4i7ga1 d2b5ea2 d2b5ea3 d2b5ea1 d2b5ea4 d2kp1a1 d2kp2a1  
d1hyua3 d1hyua4 d1j08a1 d1k9ua\_ d2opoa\_ d1r0ka3 d1j5pa3 d1vkoa2  
d1vm6a2 d3qvsa2 d1gr0a2 d1p1ja2 d3gpdg2 d2q49a2 d2g17a2 d2cvoa2  
d2czca1 d3pwka2 d1obfo2 d1i32a2 d1zyao2 d2pkqo2 d1b7go2 d2hjsa2  
d1cf2o2 d1vkna2 d1nvmb2 d2msya\_ d2djoa1 d2r5za\_ d1au7a1 d1f43a\_  
d2lmda1 d1akhb\_ d1s7ea1 d3nara\_ d1zq3p1 d2craa1 d1mija\_ d4uuta\_  
d3a01a\_ d1x58a1 d3rkqa1 d3cmya1 d2cqxa1 d2da6a1 d1e3oc1 d1fjla\_  
d1mh3a1 d1x41a1 d1wh7a1 d1gt0c1 d2mw8a\_ d1lfup\_ d1x2ma1 d1b72a\_  
d1wi3a1 d1jgga\_ d1wjha1 d1x2na1 d1mnmc\_ d2cuea1 d3k2aa\_ d2hosa\_  
d2jwta2 d1pufa\_ d1octc1 d2hi3a\_ d1b8ia\_ d4j19a\_ d3lnqa\_ d1wh5a1  
d1b8ib\_ d1hcra\_ d1tc3c\_ d1gdta1 d1u78a2 d6paxa1 d6paxa2 d1k78a1  
d1k78a2 d1b10a2 d1d5ya1 d1d5ya2 d3lv8a\_ d1s3ga1 d1zaka1 d1s4qa\_  
d3tvta2 d1uf9a\_ d1khta\_ d1ckea\_ d1osna\_ d1p5zb\_ d4tmka\_ d3cm0a\_  
d1tmka\_ d1jaga\_ d3h86a\_ d1t0hb\_ d1nn5a\_ d2h92a\_ d3kb2a1 d2c95a1  
d1yj5a2 d1kgda\_ d1ly1a\_ d2ak3a1 d1vyva2 d1deka\_ d2grja1 d1p3ja1  
d1y63a\_ d1e4ya1 d1s96a\_ d3iija1 d1lvga\_ d1nksa\_ d1vyua2 d4e22a\_  
d1qf9a\_ d1jjva\_ d1q3ta\_ d1ki9a\_ d1lw7a2 d1teva\_ d1kjwa2 d1g3ma\_  
d1j99a\_ d1t8ta1 d1nsta\_ d1fmja\_ d1zrha\_ d1ls6a\_ d2a3ra\_ d1aqua\_  
d2zptx\_ d3ckla\_ d1texas\_ d1q44a\_ d2gwha\_ d1odfa\_ d1uj2a\_ d4gi7a\_  
d2jeoa1 d1k6ma1 d1z0ja1 d3umra2 d3gj0a1 d2gaoa1 d1yzga1 d1x3sa1  
d1g7sa4 d1puja\_ d1udxa2 d1kk1a3 d2o52a\_ d1jwyb\_ d1zcaa2 d1zcba2  
d2fv8a1 d2cjwa\_ d3dz8a1 d1xzpa2 d1vg8a\_ d4qxaa\_ d2ew1a1 d1x1ra1  
d2bcgy\_ d3doea1 d3cona\_ d3rega\_ d3wyga\_ d1upta\_ d2b6ha1 d1zd9a1  
d1lnza2 d1r5ba3 d1n0ua2 d1r2qa\_ d2f91a1 d2rhda\_ d3q3jb\_ d3q85a\_

d1efma1 d1r8qa\_ d2gf9a1 d2akab1 d1ek0a\_ d1z08a1 d2gcoa1 d2dyla2  
d4g01b\_ d2cxxa1 d1svia\_ d3q72a\_ d1ni3a1 d4ac9a4 d2erxa1 d2bmea\_  
d1wxqa1 d2gf0a1 d41dja1 d1zunb3 d1d5ca\_ d4lv5b\_ d1efca3 d1kmqa\_  
d2g6ba1 d3lrpa\_ d1tada2 d2y8ea\_ d4rd4a1 d1z06a1 d2heia\_ d3a58b\_  
d1u0la2 d1d2ea3 d1zj6a1 d2ocba\_ d3rwoa\_ d1mr3f\_ d2e9sa1 d4u5xa1  
d2iwra\_ d2fn4a1 d3bwdd\_ d2nzja1 d2atva1 d2ksqa\_ d3l43a\_ d1mkya2  
d1mkya1 d1wmsa\_ d1jnua3 d2rmka\_ d1f6ba\_ d1f60a3 d1gota2 d1jala1  
d2fh5b1 d1g16a\_ d2wblc\_ d1m7ba\_ d1wf3a1 d1f5na2 d1t9ha2 d1z6xa1  
d1z0aa1 d2fg5a1 d2a5ja1 d2bcjq2 d1s0ua3 d1ky3a\_ d4y0va\_ d4lhwa\_  
d2qmea1 d2atxa1 d1egaa1 d1ryha\_ d1moza\_ d1nrjb\_ d2erya1 d3bfka\_  
d1puia\_ d1fzqa\_ d3j3az1 d3t5ga\_ d1shza2 d3defa\_ d2f7sa1 d3raba\_  
d3tsoa\_ d3aq4a\_ d2a17a1 d3sfva1 d3bc1a\_ d2ncda\_ d1sdma\_ d3h4sa1  
d2heha\_ d2grya\_ g3kin.1 d1kk8a2 d1br2a2 d1goja\_ d1f9va\_ d2mysa2  
d3t0qa\_ d4db1a1 d3gbja\_ d1ry6a\_ d1v8ka\_ d1k8ka2 d1k8ka1 d3uleb1  
d3i33a2 d3i33a1 d1bupa1 d1dkgd2 d1dkgd1 d4ci6a2 d1jcf1a1 d4a2ba2  
d2fxua1 d1yaga2 d1yaga1 d4cbua2 d1bupa2 d3vrda1 d3vrda2 d1fcdc2  
d1h1oa2 d1h1oa1 d1m70a2 d1m70a1 d1ig8a1 d1czan2 d1czan3 d1czan1  
d1ig8a2 d1czan4 d1bg3a4 d1bg3a2 d1bg3a1 d1nira1 d1hroa\_ d4gedb\_  
d3zooa\_ d1mz4a\_ d1gu2a\_ d1f1fa\_ d1dvva\_ d1c6ra\_ d1c75a\_ d1e29a\_  
d1gdva\_ d1cnoa\_ d1h32b\_ d1co6a\_ d2bh4x\_ d2aiua\_ d5cytr\_ d1jdl1a\_  
d1i8oa\_ d2zboa\_ d3dmia\_ d1ls9a\_ d1wvec\_ d2yk3a\_ d3ph2b\_ d1dw0a\_  
d5aura\_ d1ql3a\_ d1qn2a\_ d1f1ca\_ d4zzva\_ d2xspa\_ d1eg1a\_ d4v20a\_  
d1ojja\_ d4ipma1 d1gpia\_ d4csia\_ d3pfza\_ d2yoka\_ d2nqya\_ d1h4ga\_  
d1hixa\_ d1oa2a\_ d1olra\_ d3b7ma\_ d4h7ma1 d3wp3a\_ d2vgda\_ d1igoa\_  
d3zsea\_ d2nlra\_ d3wx5a\_ d1oa3a\_ d1pvxa\_ d1m4wa\_ d1f5ja\_ d1oa4a\_  
d1ks5a\_ d4ix1a1 d2ah2a1 d1evsa\_ d1cnt1\_ d1pvhb\_ d1z7ca\_ d1huwa\_  
d1rhga\_ d1f6fa\_ d1f45b\_ d1ilrb\_ d1axia\_ d1letea\_ d3tgxb\_ d1scfa\_  
d2z3qa1 d3qb1a\_ d1hula\_ d1m48a\_ d4nkqb\_ d1eera\_ d1v7mv\_ d5e4ea\_  
d2o27a\_ d3b5ka\_ d2psma1 d4zf7a\_ d3uf5a\_ d4x51a\_ d1d9ca\_ d4ypgc1  
d3oq3a\_ d1lqsl\_ d1n1fa\_ d1aula\_ d1wu3i\_ d3bes1\_ d3ux9a\_ d3rbaa\_  
d2qtra\_ d1nupa\_ d3l92a\_ d1f9aa\_ d1qjca\_ d2h29a\_ d1vlha\_ d1od6a\_  
d1lw7a1 d4ruka\_ d2e17a\_ d1iq0a2 d1irxa2 d1r6ta2 d1ivsa4 d2cyba\_  
d1rqga2 d1j09a2 d2yxna\_ d1f7ua2 d1h3fa1 d1ffya3 d2g36a1 d1nzja\_  
d1n3la\_ d1i61a\_ d1pfva2 d1h3na3 d3n9ia\_ d3sz3a1 d1f00i3 d3sw2a\_  
d1moxc\_ d1dx5i3 d1edmb\_ d1autl2 d1autl1 d1dval1 d1szba2 d1kigl\_  
d2y5fl\_ d1ijqa2 d1gk5a\_ d1g1sa2 d1nt0a3 d1xdtr\_ d1lmja2 d1lmja1  
d1nzia2 d2wphe\_ d1klil\_ d1pfxl2 d1pfxl1 d1p9ja\_ d1g1ta2 d1f7ea\_  
d4yzub\_ d2mgpa1 d1b9wa2 d2mgpa2 d1obl1c1 d1obl1c2 d1n1ia2 d1n1ia1  
d2npra2 d2npra1 d1f56a\_ d1bypa\_ d1lazca\_ d1ws8a\_ d3u25a\_ d1cuoa\_  
d1lid2a\_ d1rkra\_ d2iaac\_ d4dp1x\_ d1nwpa\_ d2gima\_ d2i7sa\_ d1qhqa\_  
d2y5ia\_ d1qlsa\_ d1psra\_ d3n22a\_ d2egda\_ d4ggfc\_ d2wcea\_ d2luca\_  
d4aqia\_ d3nsia\_ d2lp3a\_ d1j55a\_ d1a4pa\_ d1k8ua\_ d1nsha\_ d1pvaa\_  
d3fs7a\_ d2pvba\_ d1ttxa\_ d1rwya\_ d2kyfa\_ d1rk9a\_ d1a75a\_ d1lexra\_  
d1tiza1 d1nyaa\_ d1g8ia\_ d1ggwa\_ d1wdcc\_ d3fwba\_ d1ggza\_ d2o5ga\_

d1ctaa\_ d1m45a\_ d3i5gc\_ d1sl8a\_ d1fpwa\_ d2scpa\_ d2roaa\_ d4aqra\_  
d3pn7b\_ d1br1b\_ d2mysb\_ d1s6ca\_ d1bjfa\_ d2obha\_ d1jfka\_ d1jf0a\_  
d1qv0a\_ d1lkja\_ d2mlfc\_ d2m97a\_ d2d8na\_ d4by5a\_ d1jbaa\_ d4nqga\_  
d1wdcb\_ d2mysc\_ d1j7qa\_ d1s6ia\_ d1uhka2 d1r2ua\_ d1dtla\_ d3kf9a\_  
d3pn7c\_ d1qjta\_ d1c07a\_ d1gjya\_ d1y1xa\_ d1hqva\_ d1dvia\_ d1df0a1  
d1qxp2\_ d4usla\_ d1k94a\_ d1sfsa\_ d1wkya2 d1uuqa\_ d3wh9a\_ d4mlra\_  
d1xyza\_ d4xuya\_ d2je8a5 d4bf7a1 d3cuia\_ d1ur4a\_ d1qw9a2 d1lodza\_  
d2vzsa5 d1bqca\_ d2x2ya1 d1hjqa\_ d1qnra\_ d4y7ea1 d1vjza\_ d4k68a\_  
d2v3ga\_ d4hpga\_ d1nofa2 d1nq6a\_ d1h4pa\_ d1aq0a\_ d3ziza\_ d4bs0a\_  
d1ecea\_ d1h1na\_ d1ta3b\_ d1w91a2 d1ilwa\_ d1us3a2 d1legza\_ d7a3ha\_  
d1tvna1 d3nyda1 d1ghsa\_ d2cyga1 d4xv0a\_ d2c8na2 d1w32a\_ d3emca\_  
d1v6ya1 d1foba\_ d2uwfa1 d2fgla\_ d3niya1 d2c0ha1 d1rh9a1 d1yq2a5  
d1szna2 d1fa2a\_ d1pama4 d5do8a1 d1lea9c3 d1hx0a2 d2fhfa5 d1qhoa4  
d1avaa2 d1m53a2 d4m8ua1 d2gjpa2 d1lwha2 d4howa1 d1ktba2 d1j0ha3  
d3vm5a1 d2x1ia\_ d1wzaa2 d1uasa2 d2diea1 d1mxga2 d1ht6a2 d1eswa\_  
d1iv8a2 d5cpsa\_ d1ud2a2 d1zjaa1 d3gbea1 d1kwga2 d1wdpa\_ d1gcy2  
d1g5aa2 d1hvxa2 d3dhpa2 d2bhua3 d4do4a1 d3ggva1 d1e43a2 d1g94a2  
d2d3na2 d1gjwa2 d1gvia3 d1x1na1 d1r7aa2 d1tz7a1 d4toqa\_ d1wb0a1  
d1w9pa1 d1eoka\_ d1itxa1 d1kfw1 d1goia2 d1edqa2 d2gsja\_ d1hjxa1  
d1jnda1 d1vf8a1 d3wdpp1 d3wq5a\_ d1gnxa\_ d4gxp2\_ d4hz8a\_ d1e4mm\_  
d3aiua\_ d1wcga1 d1qvba\_ d3ahxa\_ d1v02a\_ d2dgaa\_ d1pbga\_ d1vffa1  
d1qoxa\_ d4ha4a\_ d2w0pa\_ d2diaa1 d2e9ia2 d2e9ja1 d2dj4a1 d2eeba1  
d2diba1 d2dmba1 d2dmca1 d2d7oa1 d2ee6a1 d2d7pa1 d2eeaa1 d2di8a1  
d1wlha1 d2d7na1 d2nqca\_ d2d7ma1 d2dica1 d3cnka\_ d2k3ta1 d2eeca1  
d1qfha2 d2bp3a1 d1v05a\_ d2ee9a1 d2eeda1 d2di9a1 d1g4ma1 d1g4ma2  
d1iuka\_ d2csua1 d3q9ub\_ d2yv1a1 d3q9na\_ d2d59a\_ d1oi7a1 d2yv2a1  
d1euca1 d1y81a1 d3nvva1 d1krha3 d2h88b1 d1t3qa2 d1kf6b2 d1zoyb1  
d1jq4a\_ d1ffva2 d1dgja2 d1rm6c2 d1h6ta1 d1h6ua1 d91dta1 d2ewda3  
d1up7a1 d2dfda1 d1s6ya1 d1vjta1 d7mdha1 d1hyea1 d1t2da1 d1ojsa3  
d1ldna1 d1hyha1 d1civa1 d2a92a1 d1ez4a1 d1i0za1 d1y6ja1 d1gv0a1  
d1ur5a1 d1lllda1 d1obba1 d1v8ba1 d1gdha1 d1l7da1 d2dllda1 d1mx3a1  
d1ygya1 d1qp8a1 d1li4a1 d1j4aa1 d2naca1 d1npya1 d3t4ea2 d1a4ia1  
d1o0sa1 d2hk9a2 d2egga2 d1b26a1 d1bvua1 d1gq2a1 d1c1da1 d1leha1  
d1gtma1 d1euza1 d1nvt1 d3dona2 d1ledza1 d1gpja2 d1vi2a1 d1p77a1  
d1nyta1 d1vl6a1 d1v91a1 d1txga2 d3f47a1 d1mv8a2 d2pv7a2 d1xc2a3  
d2ahra2 d4xiya1 d2f1ka2 d1pgja2 d1i36a2 d1np3a2 d1lj8a4 d1teaa3  
d1qmg2\_ d2i76a2 d2g5ca2 d1wdka3 d1dlja2 d3cuma3 d1kola2 d1f8fa2  
d1qora2 d1jqba2 d1vj0a2 d1cdoa2 d1gu7a2 d1d1ta2 d1xa0a2 d2dm6a2  
d1jvba2 d1llua2 d1h2ba2 d1tt7a2 d1piwa2 d1o89a2 d1iz0a2 d1e3ja2  
d1yb5a2 d1uufa2 d1vj1a2 d1e3ia2 d3gpdg1 d1vc2a1 d2nvw1 d1u8fo1  
d1ydwa1 d1hdgo1 d2g17a1 d1cf2o1 d2czca2 d1r0ka2 d1lobfo1 d2cvoa1  
d1ebfa1 d1h6da1 d1i32a1 d1zh8a1 d2q49a1 d1qkia1 d1j5pa4 d3pzra1  
d1xeaa1 d1vkoa1 d1vm6a3 d3qvsa1 d2pkqo1 d1b7go1 d1gr0a1 d1p1ja1  
d1lc0a1 d1j0xo1 d3pwka1 d2hjsa1 d1zyao1 d1vkna1 d1t1ta1 d1nvmb1

d3sjua\_ d3ojfa1 d1xu9a1 d2jjya1 d1n7ha\_ d1y1pa1 d1h5qa\_ d1jtv\_a\_  
d4fs3a\_ d2bkaa1 d1gy8a\_ d2c5aa1 d1ulsa\_ d1ooea\_ d2b69a1 d1y5ma1  
d1spxa\_ d1aela\_ d1bxka\_ d1ydea1 d1gega\_ d1hdoa\_ d1o5ia\_ d1e6ua\_  
d1snya1 d2rhca\_ d3zv4a\_ d5ceja\_ d2d1ya1 d1fjha\_ d3w8ea\_ d2fmua1  
d1x1ta\_ d1rpna\_ d3ay7a1 d1k2wa\_ d1eq2a\_ d2hrba1 d3ruaa\_ d2ew8a1  
d4hwka\_ d1xgka\_ d2bd0a1 d1yo6a1 d2a35a1 d2ntva\_ d1vl8a\_ d1hdca\_  
d4bkua\_ d2ag5a1 d2q45a\_ d1nffa\_ d4iy1a\_ d1zbqa1 d1kewa\_ d1ek6a\_  
d1ja9a\_ d2q46a2 d1iy8a\_ d1cyda\_ d2ptga\_ d1hxha\_ d1uzma1 d3lyla\_  
d4m89a\_ d3wyea\_ d2b11a1 d1w6ua\_ d1sb8a\_ d2q2va\_ d4nr0a\_ d1e6wa\_  
d2gasa\_ d3oiga1 d2bgka1 d1mxha\_ d1vl0a1 d1rkxa\_ d1r6da\_ d1wmaa1  
d1e7wa\_ d2c07a1 d1xkqa\_ d3tzha\_ d1g0oa\_ d3lz6a\_ d1qyca\_ d1ledoa\_  
d1gz6a\_ d1oc2a\_ d1t2aa\_ d1zema1 d2xoxa\_ d1z45a2 d1geea\_ d1p33a\_  
d3lt0a\_ d4e6pa\_ d2wyua\_ d1db3a\_ d4q9na\_ d1xhla\_ d4o1ma\_ d1fmca\_  
d2uvda\_ d2gdza1 d1uaya\_ d2z1ma\_ d2o23a2 d2fr1a2 d2fr1a1 d1qsga\_  
d1qyda\_ d4zjua\_ d2a4ka1 d1yb1a\_ d1wvga1 d1yxma1 d3f4ba\_ d1mg5a\_  
d1xg5a1 d1e2ta\_ d4c5pa\_ d2bsza1 d4bgfa\_ d1w4ta1 d1mixa2 d1e5wa2  
d1j19a2 d1isna2 d2a16b2 d3ioqa\_ d1fh0a\_ d1o0ea\_ d1m6da\_ d2cb5a\_  
d1cs8a\_ g8pch.1 d1s4va\_ d2pnsa\_ d1vsna1 d1mira\_ d1iwda\_ d2oula\_  
d7pcka\_ d3bwka\_ d3bcna\_ d2p86a\_ d1pvja\_ d1pcia\_ d1gece\_ d1deua\_  
d4bs6a\_ d1xkga1 d1cqda\_ d1jqpa2 d2c0ya\_ d2bdza\_ d3p5ua\_ d1ex4a2  
d1c6va\_ d2jk6a2 d2jk6a1 d1feca1 d1feca2 d1lpfa1 d1lpfa2 d1xhca1  
d1xhca2 d1dx1a2 d1dx1a1 d1gera2 d1m6ia2 d1onfa1 d3lada2 d3lada1  
d1w4xa1 d1w4xa2 d1gesa2 d1mo9a1 d1xdia1 d1fl2a2 d1fl2a1 d1fcda1  
d1fcda2 d1h6va2 d1h6va1 d1mo9a2 d1gv4a2 d1gv4a1 d2gv8a2 d2gv8a1  
d1aoga1 d1aoga2 d1hyua1 d1ebda1 d1ebda2 d3dk9a1 d1q1ra2 d1q1ra1  
d1gesa1 d1pv8a\_ d1w5qa\_ d2c1ha\_ d1ohla\_ d1zbf1a1 d2z1ha\_ d2etja1  
d3qioa1 d1j11a\_ d2e41a\_ d1j12a\_ d21sna1 d1io2a\_ d1uaxa\_ d2yv0x\_  
d1mu2a1 d1lekea\_ d1i39a\_ d1ps9a2 d1lqta1 d1cjca1 d1pn0a1 d1reoal  
d1ju2a1 d2f5va1 d3c96a1 d2gmha1 d1pj5a2 d1gpea1 d1o5wa1 d1n4wa1  
d1k0ia1 d2dw4a2 d2ivda1 d1seza1 d2voua1 d1kdga1 d1s5ja1 d2hbja2  
d2igia\_ d1wlja\_ d1qhta1 d4dlea1 d1tgoa1 d2f96a1 d3tr8a1 d3mxma\_  
d1q8ia1 d1y97a1 d1w0ha\_ d1kfsa1 d2py5a1 d1noya\_ d1d5aa1 d1yt3a3  
d2guia\_ d3mwp1a1 d4kb1a\_ d1lix2a\_ d1wgqa1 d1v89a1 d2coda1 d1zc3b\_  
d1wg7a1 d1u5ea1 d1v61a1 d2coca1 d2ys1a1 d1v5pa1 d1nty2a1 d1wjma1  
d1wila1 d1u29a\_ d1xx0a1 d1unqa\_ d2zkmx3 d1fhoa\_ d1v88a1 d2adza1  
d1x1fa1 d1p6sa\_ d2coaa1 d1btka\_ d1v5ma1 d2x18a\_ d1dyna\_ d1x1ga1  
d4kaxb\_ d2j59m1 d1kilb2 d1xcga2 d1txda2 d1u5da1 d1dbha2 d1wlha\_  
d1upqa\_ d1v5ua1 d1foea2 d2fjla1 d1eaza\_ d2dfka2 d2cofa1 d1kz7a2  
d1y4wa1 d1r7ha\_ d1faaa\_ d1wika1 d1xfla\_ d1ttza1 d2f51a1 d1ti3a\_  
d1nhoa\_ d1sena\_ d2i4aa\_ d1ep7a\_ d1zmaa1 d1fo5a\_ d3lefa1 d3diea1  
d2yana1 d1z6na1 d1oaza\_ d3zywa1 d4aj8a\_ d1nm3a1 d4fiwa\_ d1wmja\_  
d4hs1a1 d1iloa\_ d1xwaa1 d1wjka1 d2vm1a\_ d1gh2a\_ d1h75a\_ d1nw2a\_  
d1kx5b\_ d3a6na\_ d4m6ba2 d2nqbd\_ d3wkjd\_ d2yfwe\_ d4h9na\_ d5bnxa\_  
d1kx5c\_ d3r45a\_ d1eqzb\_ d4jjnb\_ d1f66c\_ d1eqza\_ d4wnnb\_ d1kx5a\_

d1u35c1 d1lid3a\_ d2nqbc\_ d1tafa\_ d1tafb\_ d1jfib\_ d1q9ca\_ d1h3ob\_  
d2byka1 d1n1ja\_ d4g92b\_ d1bh9a\_ d1jfia\_ d1h3oa\_ d2bykb1 d1n1jb\_  
d1pd212 d1nhya2 d2a2ra2 d1k0dd2 d1f2ea2 d1gsua2 d1f3ba2 d2fhea2  
d2pvqa1 d1tw9a2 d1oyja2 d1e6ba2 d1k0ma2 d3ik7a1 d4is0a1 d1r5aa2  
d1jlva2 d1m0ua2 d3gtub2 d1z9ha2 d1okta2 d1axda2 d2gsra2 d1tu7a2  
d1k3ya2 d1zagma1 d1b48a2 d1gnwa2 d1gwca2 d2gsta2 d1glqa2 d1pn9a2  
d1v2aa2 d1fw1a2 d1duga2 d1novc\_ d2bbvc\_ d1qsaa2 d3wyha\_ d4g9sa1  
d3gxra\_ d1qqya\_ d1gd6a\_ d1f6ra\_ d1livma\_ d2gv0a\_ d1iiza\_ d2z2fa\_  
d1j8xa\_ d1ghla\_ d1b9oa\_ d1741a\_ d1691a\_ d2o4wa\_ d1p37a\_ d1k28a3  
d1xjta1 d1jtma\_ d2f2qa\_ d4e97a1 d1iyka2 d1iyka1 d1rxta1 d1iica2  
d2za0a\_ d2c21a1 d1mpya2 d1kw3b2 d1kw3b1 d4ghga1 d1tfza1 d3isqa1  
d3isqa2 d1sqia1 d1sqia2 d1lkda2 d1mpya1 d1cjxa2 d1cjxa1 d1sp9b2  
d1t47a1 d1t47a2 d1f1ua2 d1sp8a1 d1sp8a2 d1f1ua1 d2bema\_ d1pama1  
d1lea9c1 d1qhoa1 d2fhfa2 d2fhfa1 d1k3ia1 d1j0ha1 d1csla1 d2bhua1  
d1ledqa1 d1f1sa2 d1ut9a2 d1gvia1 d1txka1 d1s5ja2 d1qhta2 d4dlea2  
d1tgoa2 d3py8a2 d1q8ia2 d1kfsa2 d2py5a2 d1d5aa2 d1qsta\_ d2beia1  
d4m3sa\_ d1u6ma1 d1ygha\_ d1yk3a1 d3dr6a\_ d1xmta\_ d1z4ea1 d2ge3a1  
d1bo4a\_ d2fiaa1 d2jdca1 d1y9wa1 d3to7a\_ d1wwza1 d2fl4a1 d2ozua1  
d2b5ga\_ d2cy2a1 d2p0wa\_ d1cm0a\_ d4pswa\_ d1yrea1 d1yr0a1 d1m4ia\_  
d2gana1 d1yvka1 d2g3aa1 d1y7ra1 d2eulia1 d1q2ya\_ d2fsra1 d1xeba\_  
d2ae6a1 d1cjwa\_ d1qsma\_ d2aj6a1 d1y9ka1 d1i12a\_ d1vkca\_ d2atra1  
d1n71a\_ d2d4pa1 d2fiwa1 d2fe7a1 d1tiqa1 d2ou2a\_ d1yx0a1 d2fcka1  
d1p0ha\_ d2j8ma\_ d2pq8a\_ d1z4ra1 d1s3za1 d1ufha\_ d2hqya1 d2hqya2  
d1lrza2 d1ne9a1 d1ne9a2 d1xvqa1 d1pn0a2 d3hy2a\_ d2cvba1 d1o8xa\_  
d1lu4a\_ d1we0a1 d2bmxal d2a4va1 d1psqa\_ d1xiya1 d1q98a\_ d1n8ja\_  
d1zofa1 d2ggta\_ d3tjja\_ d4je1a1 d3s9fa\_ d2zcta\_ d1qmva\_ d1jfua\_  
d2b1ka\_ d5dvba1 d2b5xa1 d2v2ga\_ d1st9a\_ d3tb2a\_ d41lra\_ d4fh8a1  
d1e2ya\_ d1knga\_ d2h30a\_ d1i5ga\_ d2z9sa\_ d2f8aa1 d1tp9a1 d2b7ka\_  
d1nm3a2 d3hvva\_ d2wfca1 d4kcea\_ d1xvwa1 d4gqca1 d3qpma\_ d4k1fa\_  
d1zsoa1 d1gp1a\_ d1prxa\_ d4od7a1 d1z6ma1 d4mcua1 d4dvca1 d1r4wa\_  
d3l9sa\_ d1un2a\_ d3rppa\_ d1zsqal d2m5ta\_ d1wqsa\_ d5bpea\_ d2ipha\_  
d1lvoa\_ d2bhga1 d3tnta\_ d3sjia\_ d3d23a1 d2fyqa\_ d3tloa\_ d3zvea1  
d2hrva\_ d3q3ya1 d4asha1 d1cg2a1 d1yloa2 d1y7ea2 d1y0ya3 d1l1fwa1  
d1vixa1 d1fnoa4 d1vhoa2 d1ysja1 d1vhea2 d1z21a1 d2fvga2 d1vgya1  
d2grea2 d1xmba1 g1q7l.1 d1rtqa\_ d1letha2 d1w52x1 d2ppla1 d1lpbb2  
d2oxea1 d1bu8a2 d1rpla2 d1ys1x\_ d4hs9a\_ d1ex9a\_ d1ku0a\_ d3qmma\_  
d2h1ia1 d2r8ba1 d3b5ea1 d3cn9a\_ d1auoa\_ d1lgya\_ d4l3wa\_ d1l1fa\_  
d1lukca\_ d3ia2a\_ d1a88a\_ d4dgqa1 d1hkha\_ d1zoia\_ d2bk7a\_ d3fjua\_  
d1z5ra1 d1kwma1 d1uwya2 d1jqga1 d2c1ca1 d1dtda\_ d1h81a2 d2tbvc\_  
d1c8nc\_ d1x36a\_ d1smvc\_ d1ng0c\_ d4sbvc\_ d1lopa\_ d1f2nc\_ d1cixa\_  
d1y29a\_ d1v7fa\_ d2jtba\_ d1d1ha\_ d1g9pa\_ d1lupa\_ d1qk7a\_ d1mb6a\_  
d2a2va\_ d1niya\_ d1i25a\_ d1hvwa\_ d2mpqa\_ d1ie6a\_ d1kqha\_ d1la4a\_  
d2mxoa1 d1d10a\_ d1koza\_ d1qk6a\_ d1emxa\_ d1lqra\_ d1c6wa\_ d1rmka\_  
d1ixta\_ d1eyoa\_ d1cna\_ d1glpa\_ d1f3ka\_ d1fyga\_ d3lgia\_ d3i77a\_



d2z9ia2 d4nsva\_ d1lcya2 d4jcn\_ dlagja\_ dlos8a\_ dlhpga\_ dlp3ca\_  
d1l1ja\_ dl1ny721 d1ny722 d1a6ca3 d1a6ca1 d1pgl22 d1pgl21 d1pgl11  
d1ny711 d1mqta\_ d1d4m3\_ d1fmd3\_ d2mev1\_ glaym.1 d1ev13\_ d4q4w1\_  
d1r1a3\_ d2x5ia\_ d1rhi1\_ glr1a.1 gl1d4m.1 glrhi.1 d1b35b\_ d1loopa\_  
d1tme1\_ d4iv1a\_ glpvc.1 glf1pn.1 d1f1pn1\_ d4gb31\_ d1d4m1\_ d1fmd1\_  
d1ev11\_ d2wzr3\_ glcov.1 d1qqp3\_ glfmd.1 d2x5ic\_ d1rhi3\_ gloop.1  
d1hxs1\_ glhxs.1 d1f1pn3\_ d1bev1\_ g2mev.1 d1eah3\_ d1aym1\_ d1pvc3\_  
d1qqp1\_ d1zba3\_ d1h8ta\_ d3vbhc\_ glb35.1 glbev.1 d1hxs3\_ gl1ev1.1  
d1bev3\_ gl1tmf.1 d1tmf1\_ d1b35a\_ d2mev3\_ gl1eah.1 gl1h8t.1 d1eah1\_  
d4q4w3\_ d1r1a1\_ d1aym3\_ d1pvc1\_ d1zba1\_ d1h8tc\_ d1loopc\_ d1tme3\_  
gl1qqp.1 d4iv1c\_ d3ubub\_ d1legia\_ d1qo3c\_ d1v7pa\_ d1tdqb\_ d3ubua\_  
d1c3ab\_ d1h8ua\_ d3bx4b\_ d1t8ca1 d1sb2a1 d1qdda\_ d2ziba1 d3cada\_  
d1byfa\_ d1j34b\_ d1jwia\_ d1jzna\_ d1c3aa\_ d1oz7b\_ d1wmza\_ d3bdwb\_  
d1hq8a\_ d1fifa1 d1dv8a\_ d3hupa\_ d1wk1a1 d1umra\_ d2afpa\_ d3bx4a\_  
d1gz2a\_ d1sl6a\_ d1v7pb\_ d3g8ka\_ d1ixxa\_ d1j34a\_ d1jwib\_ d1g1sa1  
d1y17a1 d1ja3a\_ d3bdwa\_ d1sb2b1 d1fvua\_ d1umrc\_ d1oz7a\_ d4m17a\_  
d3cfwa1 d1ypqa1 d1g1ta1 d3fd4a\_ d3l9jc\_ d4dn8a1 d1v4lb\_ d1rd11\_  
d2msba\_ d1eixa\_ d3exra\_ d2ffca1 d2fdsa1 d3n3ma1 d2czda\_ d1q6oa\_  
d2yyua\_ d1vqta1 d1dbta\_ d3ldva1 d4lt9a1 d3tc7a1 d3hoja\_ d1i4na\_  
d3vnda\_ d3n18a1 d1geqa\_ d3nav1a1 d1v5xa\_ d4a2ra1 d3tc6a1 d1ujpa\_  
d4ijba\_ d1xcfa\_ d1vc4a\_ d1rd5a\_ d3b5va\_ d2r80b\_ d1cqxa1 d1cg5a\_  
d3boma\_ d2h8fb\_ d2raoa\_ d3bj1a\_ d4hrrb\_ d2r50a\_ d3d1kb\_ d2aalb1  
d3zhwa\_ d3hf4b\_ d3gdja\_ d1jebb\_ d3bj1b\_ d1x9fb\_ d1wmub\_ d1gcva\_  
d3bcqb\_ d3d4xb\_ d1gvha1 d2dc3a\_ d3hf4a\_ d4yu3a\_ d3k8ba\_ d1qpwb\_  
d2r80a\_ d3bcqa\_ d1v4wa\_ d3wtgb\_ d1j17a\_ d4esaa\_ d1a9we\_ d3d1ab\_  
d1fsla\_ d4h21a\_ d1v4wb\_ d1mwca\_ d1vhba\_ d1jeba\_ d1spgb\_ d1h97a\_  
d1q1fa\_ d1tu9a1 d3d1aa\_ d1hdsb\_ d3hyub\_ d2zfb\_ d3fs4a\_ d1oj6a\_  
d1shrb\_ d4h21b\_ d4yu3b\_ d1spga\_ d3hrwa\_ d3qqra\_ d3at5a\_ d4wchd\_  
d3hyua\_ d1cg5b\_ d1uc3a\_ d1hbra\_ d2raob\_ d1outb\_ d4esab\_ d3gdjb\_  
d3qqqa\_ d1x9fc\_ d3vrfa\_ d1litha\_ d3mkba\_ d3d4xa\_ d3mjpa\_ d1j16a\_  
d3fh9a\_ d1outa\_ d2dc3b\_ d1lit2a\_ d3eoka\_ d3g46a\_ d1qpwa\_ d3vrfb\_  
d1ch4a\_ d1x9fd\_ d1hdsa\_ d2zfba\_ d3mkbb\_ d1or4a\_ d3wtga\_ d1a4fa\_  
d3fh9b\_ d3bomb\_ d3cy5a\_ d3at5b\_ d1x9fa\_ d2oifa\_ d4lmb\_ d1cpcb\_  
d3v57a\_ d1kn1a\_ d1cpca\_ d4f0ta\_ d2vjha\_ d4po5b\_ d1eyxa\_ d1alla\_  
d4f0tb\_ d1b33b\_ d1b8db\_ d4h0mb\_ d2vjhb\_ d4lm6b\_ d2vmlb\_ d1allb\_  
d2vjta\_ d3dbja\_ d2vmla\_ d2vjtb\_ d4f0ub\_ d1f99b\_ d4rmpa1 d1liaa\_  
d1eyxb\_ d2uulb\_ d4lmsb\_ d4f0ua\_ d2bv8a\_ d1f99a\_ d2bv8b\_ d2c71b\_  
d3dbjb\_ d4rmpb1 d1b8da\_ d4h0ma\_ d3v57b\_ d1kn1b\_ d1liab\_ d2uula\_  
d2j96a\_ d1azwa\_ d1hlga\_ d2xqfa\_ d1ea5a\_ d1f6wa\_ d1dx4a\_ d1qe3a\_  
d1k4ya\_ d4qwwa\_ d2ha2a\_ d1r88a\_ d1sfra\_ d4qeka\_ d2qvba\_ d2v9za\_  
d4kafa1 d1jmxa4 d1jmxa3 d1pbya3 d1b9ra\_ d1offa\_ d1frra\_ d3wcqa\_  
d1l5pa\_ d1wria\_ d1i7ha\_ d3av8a\_ d1czpa\_ d1rfka\_ d3plma1 d3b2ga\_  
d2bt6a2 d4iuua3 d4bvva\_ d5hpga\_ d3k65a\_ d1ki0a3 d1ki0a2 d1ki0a1  
d1a0ha1 d1pmla\_ d3sp8a3 d2feba1 d1f74a\_ d3l21a\_ d2e1da\_ d1to3a1

d1w3ia\_ d1sfla\_ d1n7ka\_ d1vcva1 d4imea\_ d1wa3a\_ d2ocza1 d1f2ja\_  
d3m16a\_ d2yxga\_ d1ub3a\_ d3a5fa\_ d1fbaa\_ d1l6wa\_ d1xfba1 d1wx0a1  
d1vpxa1 d1ojxa\_ d1mxsa\_ d2a4aa1 d1xkya1 d3cq0a1 d3s1xa\_ d1f05a\_  
d1fdja\_ d3cpra1 d4d2ja\_ d1eh3a\_ d3skpa\_ d1dtza2 d1ieja\_ d1jnfa2  
d1ce2a1 d1jnfa1 d1b1xa2 d1b1xa1 d1jw1a1 d1jw1a2 d1ryoa\_ d1h76a1  
d1h76a2 d3rp2a\_ glucy.1 d1fuja\_ d2zchp\_ d3w94a\_ d1si5h\_ d1lo6a\_  
g2pka.1 d1cgha\_ d1kigh\_ d1a5ia\_ d3s9ba\_ d1hj8a\_ d1ao5a\_ d2anya\_  
d1q3xa1 d1gvza\_ d1azza\_ d4gsoa\_ d2f91a1 d1iaua\_ d1gdna\_ d1eufa\_  
g1fiw.1 d1eq9a\_ d4nfea\_ d2rdla\_ d1spja\_ d1elva1 d1a7sa\_ d1ekbb\_  
d1pfxc\_ d1yc0a\_ d2aiqa\_ g1fiz.1 d1fi8a\_ d4k60a\_ d4dgja\_ d1mzaa\_  
d1op0a\_ d3tjva\_ d1pytd\_ d1sgfg\_ g1gg6.1 d2eeka\_ glrtf.1 d1a0ja\_  
d3g01a\_ d1pytc\_ d4e7na\_ d1ddja\_ d1z8ga1 d2hlca\_ d1npma\_ d1brup\_  
g1jou.1 d1sgfa\_ d1autc\_ g2hnt.1 g1kdq.1 d1orfa\_ d3s69a\_ d4crga\_  
d1fxya\_ d1bqya\_ d2ftba\_ d1pmpa\_ d2rcqa1 d1fdqa\_ d4lkpa\_ d1sa8a\_  
d1vyfa\_ d1lpja\_ d3vg7a1 d4azqa1 d1o8va\_ d5bvqa\_ d1p6pa\_ d2qo4a\_  
d1opba\_ d1yival d1o1va\_ d4bvma1 d4tkba\_ d4i3ba\_ d1bwya\_ d1ftpa\_  
d1ggl\_a\_ d4gkca\_ d1cbia\_ d3p6da1 d1kqwa\_ d2a0aa1 d1jx4a2 d3gv5b1  
d1t94a2 d3bq0a2 d1e69a\_ d1mv5a\_ d3g60a4 g1ii8.1 d1ewqa2 d1ji0a\_  
d1qhla\_ d1v43a3 d2wmfa1 d1vp1a\_ d1g2912 d4a82a2 g1f2t.1 d2d62a1  
d3tuic1 d2bbsa1 d3g60a3 d2ixea\_ d1sgwa1 d2qi9c\_ d3rlfa1 d3b60a1  
d3d31a2 d2pzea1 g1xew.1 d1jj7a\_ d1oxxk2 d2onka1 d1wlwa\_ d1iwea\_  
d1qf5a\_ d1vmaa2 d1nija1 d1np6a\_ d2p67a1 d3ihla\_ d1okkd2 d1ls1a2  
d1s1ma2 d1iona\_ d2v40a\_ d1dj3a\_ d3hida\_ d2vol1a1 d2g0ta1 d1vcoa2  
d1j8mf2 d1g3qa\_ d1xjca\_ d1p9ba\_ d1qzxa3 d1ihua2 d1ihua1 d2qm8a\_  
d1dj2a\_ d4ioja\_ d1cp2a\_ d1yrba2 d1hyqa\_ d3gqba2 d1skye3 d1xp8a1  
d1tf7a2 d1tf7a1 d1ye8a1 d1skyb3 d2qe7d2 d4blta\_ d4huta\_ d3l1daa2  
d4hyya\_ d2i3ba1 d1crla\_ d3j9tb2 d3ntua2 d1vdza1 d2z43a\_ d1e9ra\_  
d1nlfa\_ d3ziaa2 d1n0wa\_ d1g6oa\_ d3ziad2 d3j9ta2 d3gqbb2 d2i49a\_  
d1nnfa\_ d1xvxa\_ d1ursa\_ d1h3da1 d1iuda\_ d4m1va1 d1twya\_ d3e13x\_  
d2nxoa1 d4pfua\_ d3ttma\_ d1elja\_ d2qmwa1 d1us5a\_ d1y3na1 d1jeta\_  
d1uqwa\_ d4f19a1 d2esna2 d3thia\_ d3fasa1 d2uyeb\_ d2xwva1 d1r91a\_  
d2fyia1 d2ozza1 d1sw5a\_ d1nh8a1 d1vr5a1 d2g29a\_ d1xs5a\_ d3lswa\_  
d2z23a\_ d3w9va\_ d3tcha\_ d1q35a\_ d1z7me1 d3q27a\_ d1p99a\_ d1ve4a1  
d2i6ea1 d4mcoa1 d4n8ya\_ d1eu8a\_ d1zbma1 d1hsla\_ d1ixca2 d1j1na\_  
d1xvya\_ d1y9ua\_ d2z22a1 d1xoca1 d4oera\_ d1wdna\_ d5f1qa1 d1xt8a1  
d1i6aa\_ d4gwoa\_ d4igta1 d1pc3a\_ d4mmpa1 d1o63a\_ d2cz1a1 d2onsa2  
d4mija1 d4ok5a1 d2bmfa1 d2bmfa2 d1yksa1 d1yksa2 d2qeqa1 d2j1qa1  
d1a1va2 d1m8pa3 d1c4oa1 d2p6ra3 d2p6ra4 d1oywa2 d1oywa3 d1wrba1  
d1w36b2 d1w36b1 d1c4oa2 d3bora\_ d1t6na\_ d2eyqa5 d2eyqa3 d2eyqa2  
d2zu6a2 d1veca\_ d1uaaa1 d1w36d1 d2g9na1 d1z3ix2 d2rb4a\_ d1hv8a1  
d1hv8a2 d1t5ia\_ d1w36c2 d2j0sa2 d2j0sa1 d1fuka\_ d3hjha1 d1z5za1  
d1qdea\_ d1z63a1 d1s2ma2 d1s2ma1 d1wp9a1 d1wp9a2 d1gm5a3 d1gm5a4  
d3dina4 d3dina3 d1q0ua\_ d1w36c1 d1z3ix1 d1nkta3 d1uaaa2 d1w36d2  
g1qhh.1 d2fwra2 d2fwra1 d3q3ma\_ d1za0a1 d2inca\_ d1jk0a\_ d2incb\_

d1mhyb\_ d3hf1b\_ d1mtyb\_ d1r2fa\_ d2uw1a\_ d1mhyd\_ d3n37a\_ d1afra\_  
d1oquc\_ d1syya\_ d1mtyd\_ d2o1za\_ d1uzra\_ d1smsa\_ d2fkza\_ d1zuja1  
d1s3qa1 d2fjca1 d1z6om1 d1veia\_ d4dyya\_ d1jiga\_ d3gvya\_ d2pyba\_  
d4cy9a1 d3bvfa1 d1r03a\_ d2cf7a\_ d1nf4a\_ d1zs3a1 d4iwka\_ d3ka8a\_  
d3np0x\_ d1n1qa\_ d11b3a\_ d4e6ka\_ d1z6oa1 d2fzfa1 d4dyua\_ d3ge4a\_  
d1jgca\_ d4am4a\_ d2z6ma\_ d1ji5a\_ d1vlga\_ d11koa1 d1krqa\_ d3qz3a\_  
d1o9ra\_ d2ffxj\_ d1euma\_ d1yv1a1 d2v2pa\_ d1j30a\_ d4di0a\_ d1oewa\_  
d2qzxa\_ d2asia\_ d1psoe\_ d1miqa\_ d1smra\_ d2h6ta\_ d1pfza\_ d1lizda\_  
d3hd8a\_ d1j71a\_ d1dpja\_ d4aa9a\_ d1t6ex\_ g1b5f.1 g1lya.1 g1htr.1  
d1qdma2 d1bxoa\_ d1wkra\_ d1tzsa\_ d2qzwa\_ d2v76a\_ d1wj1a1 d1aqca\_  
d1qqga2 d1qqga1 d1ntva\_ d1n3ha\_ d4dbba\_ d3f0wa1 d1p3ra\_ d1wgua1  
d2cy4a1 d3hqca\_ d1wvha1 d1xr0b1 d1bdqa\_ d3ggta\_ d3ixoa\_ d1mrxa\_  
d2haha\_ d1tw7a\_ d4njsa\_ d1sgua\_ d2p3da\_ d1nsoa\_ d3d3ta\_ d2rkfa\_  
d1c6ya\_ d2rspa\_ d3ogpa\_ d3ekwa\_ d2o4na\_ d2j9ja\_ d1baia\_ d3ggua\_  
d3lzua\_ d4npua\_ d4j55a\_ d2r8na\_ d2fxda\_ d2p3ca\_ d4dqa\_ d3ttpa\_  
d3t3ca\_ d2p3aa\_ d2hc0a\_ d2fdda\_ d3mwsa\_ d1wgda1 d1wgga1 d4q5eb\_  
d1wjna1 d1se9a\_ d3n3kb\_ d1wz0a1 d1we6a1 d2m0xa\_ d2gbka\_ d3rt3b1  
d1wh3a1 d1sifa\_ d2ekek2 d4ii2b1 d4hk2a1 d1c3ta\_ d1m94a\_ d1wgha1  
d1ttna1 d1j8ca\_ d1wx8a1 d3v6cb1 d2ma9b\_ d4i61b1 d1bt0a\_ d2jvca1  
d1iyfa\_ d2k1fa\_ d1wxva1 d1wf9a1 d1t0ya\_ d2io0b2 d1x1ma1 d2gbma\_  
d1zw7a1 d2m17a\_ d1we7a1 d2l1wa\_ d2gbja\_ d1wjua1 d1v6ea1 d1v86a1  
d4eewa\_ d1w1aa1 d4icva\_ d4gu2a\_ d1wx7a1 d1wy8a1 d4hjka1 d2faza1  
d1v5oa1 d2a13a1 d2cr5a1 d1wj4a1 d1s3sg\_ d3ubra\_ d1qo8a1 d1d4ca1  
d2k3va\_ d1ft5a\_ d1qdba\_ d1m1qa\_ d2j7aa\_ d1h21a\_ d1ogyb\_ d4fasa\_  
d1jnia\_ d1sp3a\_ d1eysc\_ d2h0ba\_ d2erfa\_ d1h30a2 d1h30a1 d3mw4a1  
d1pz7a\_ d2r1ba\_ d3v64a1 d1d2sa\_ d3bopa1 d3mw3a1 d1okqa1 d2bcgg1  
d2bcgg2 d1d5ta1 d1um8a\_ d1ixza\_ d1qvra2 d1qvra3 d1qzma\_ d1sxjc2  
d1jr3d2 d2p65a\_ d118qa2 d1g8pa\_ d3hu3a3 d1sxjd2 d1njfa\_ d1in4a2  
d1sxja2 d1tuea1 d2ce7a2 d1w5sa2 d1sxjb2 d1d2na\_ d1ny5a2 d1ofha\_  
d2gnoa2 d2a5yb3 d1fnna2 d1u0ja1 d11v7a\_ d1iqpa2 d2fnaa2 d1ixsb2  
d4gita\_ d1sxje2 d1g41a\_ d1svpa\_ d1mbma\_ d3su6a1 d1cu1a1 d4agka\_  
d1vcpa\_ d1q31a\_ g1n11.1 d3e90b\_ d1ep5a\_ d3u1jb\_ d2e3fa\_ d1mm0a\_  
d2e3ea\_ d211da\_ d2ny8x\_ d2e3ga\_ d2ny9x\_ d2nz3a\_ d21j7a\_ d1n4na\_  
d2m8bb1 d2kyqa\_ d3psma\_ d1jxca\_ d2g11a\_ d1ugla\_ d4uj0a\_ d2k4ua\_  
d1hp2a\_ d2lu9a\_ d1baha\_ d2meoa1 d1wm7a\_ d1hlya\_ d1n8ma\_ d1jlza\_  
d1wpda\_ d1c55a\_ d1pvza\_ d1wt7a\_ d1rjia\_ d1wz5a\_ d1m2sa\_ d1pjva\_  
d1c49a\_ d1qkya\_ d2ktca1 d1wmta\_ d1du9a\_ d1j5ja\_ d1r1ga\_ d1t0za\_  
d2i61a\_ d1t1ta\_ d1sn4a\_ d1kv0a\_ d21kba\_ d1npia\_ d1wwna\_ d1pe4a\_  
d2kbka\_ d2li7a\_ d2kbha\_ d1dq7a\_ d1sega\_ d1omya\_ d1zywa1 d1jzaa\_  
d2jcqa\_ d1n9wa1 d1bbua1 d1e1oa1 d1c0aa1 d1b8aa1 d3a74a1 d1eova1  
d1t61c1 d1iyjb4 d1iyjb5 d1iyjb3 d1o7ia\_ d4ipca1 d1x3ea\_ d4apva\_  
d1jb7a1 d1jb7a2 d1jb7a3 d3kdfa\_ d1ue1b\_ d1wjja1 d3eiva\_ d1xjva2  
d1xjva1 d2ccza2 d1se8a\_ d111oc\_ d1jb7b\_ d1qvca\_ d3ulla\_ d1qzga\_  
d1mia4 d1mia5 d1mia3 d3g48a1 d1gd7a\_ d1mkha\_ d1jjcb3 d1y14b1

d2nn6i1 d1i94l\_ d2zjra2 d1smxa\_ d2qamc2 d1hh2p1 d2r7da1 d1rl2a2  
d1wfaq1 d3bzka4 d1x6oa2 d3a0ja\_ d2j01d2 d2ja9a1 d4q15a\_ d1hr0w\_  
d1luza\_ d2n3sa\_ d2vnud1 d1h95a\_ d1go3e1 d2nn6h1 d1ne3a\_ d2mo1a\_  
d1liz6a2 d1jjga\_ d1e3pa2 d2ix0a3 d2ix0a2 d21xja\_ d1ueba3 d1ueba2  
d2z0sa1 d1u01a1 d2ix0a1 d2eifa2 d2je6i1 d3i2za1 d2c35b1 d2ahob2  
d1t9ha1 d3i4oa\_ d2qall1 d1jt8a\_ d2nn6g1 d1g6pa\_ d3cama\_ d1i94q\_  
d1d7qa\_ d2ba0a1 d2vnud2 d2vnud3 d1khia2 d2qalq1 d1wi5a1 d1xtda2  
d1ny4a\_ d1dzka\_ d4tlja\_ d2a2ua\_ d4wfvva\_ d3t1da\_ d4iaxa\_ d3zq3a\_  
d2nnda\_ d1i4ua\_ d1kxoa\_ d1bbpa\_ d1kt7a\_ d1exsa\_ d3s26a1 d1lf7a\_  
d1qfta\_ d4gh7a\_ d1z24a1 d1qabe\_ d1xkia\_ d3bx7a\_ d4iawa1 d1n0sa\_  
d1gkab\_ d3kzaa\_ d2k23a\_ d2l9ca1 d2joza1 d1gm6a\_ d3kffa\_ d3saoa1  
d1e5pa\_ d1yupa1 d1iiua\_ d2a1ka\_ d1je5a\_ d1rpma\_ d2shpa1 d1yfoa\_  
d1l8ka\_ d2ooqa1 d1g4us2 d1p15a\_ d1lara2 d1lara1 d1wcha\_ d2fh7a2  
d2fh7a1 d1ohea1 d1ohea2 d2f4da\_ d1rxda\_ d2hxpa\_ d1xria\_ d1d5ra2  
d1fpza\_ d3ezza\_ d4y2ea\_ d1i9sa\_ d3azya\_ d3wvja\_ d1upsa1 d1ajoa\_  
d2hyka\_ d1ajka\_ d2vy0a\_ d1o4ya\_ d3o5sa\_ d3d6ea\_ d3atga\_ d1dypa\_  
d1umza\_ d3i4ia\_ d4lbqa\_ d1a78a\_ d1slta\_ d4no4a\_ d3zsj\_ d3duia\_  
d1g86a\_ d1lis3a\_ d1qmja\_ d1hlca\_ d1tdha3 d1q3ba3 d1ee8a3 d1k82a3  
g1qmo.1 g1len.1 d3zyra\_ d1fnya\_ d1n47a\_ g21tn.1 d1avba\_ d3usua\_  
d1dhkb\_ d1f9ka\_ d1ukga\_ d1g8wa\_ d1g9fa\_ d1wbfa\_ d3wcsa\_ d1g7ya\_  
g1loe.1 d1mvqa\_ d1hq1a\_ d1v6ia\_ d1dbna\_ d1qnwa\_ d1fx5a\_ d4l8qa\_  
d1ioaa\_ d3n35a\_ d1epwa1 d3h33a\_ d1rwja\_ d19hca\_ d1os6a\_ d3bxua\_  
d3h4na\_ d1i77a\_ d3caoa\_ d1j0pa\_ d2ctha\_ d1duwa\_ d2e84a\_ d1hh5a\_  
d1gyoa\_ d3h34a\_ d1dszb\_ d1a6ya\_ d3cbba\_ d1ynwa1 d1r4ia\_ d1hcqa\_  
d2hana\_ d2hanb\_ d2enva1 d1kb4b\_ d2n11b\_ d1l01a\_ d1cita\_ d2dara2  
d2dara1 d1wyha2 d2d1oa2 d1rutx4 d1rutx3 d2cuqa2 d1x41a2 d1x41a1  
d1x3ha2 d1x3ha1 d2d8za1 d1x61a2 d1x6aa1 d1x6aa2 d2cora2 d2cora1  
d1v6ga1 d1v6ga2 d2d8za2 d1x64a1 d1x64a2 d1b8ta1 d2co8a1 d1x63a2  
d2dj7a2 d2dj7a1 d2cu8a2 d2cu8a1 d1g47a2 d1g47a1 d1j2oa1 d1wyha1  
d2d1oa1 d1wiga1 d1wiga2 d2cupa2 d2cupa3 d1x68a1 d2d8ya2 d2d8ya1  
d1m3va2 d1x62a1 d1x68a2 d1x61a1 d1b8ta3 d1b8ta2 d2d8xa2 d2d8xa1  
d1x4ka1 d1x4ka2 d2cuqa1 d1m3va1 d2co8a2 d1j2oa2 d1x63a1 d2cura1  
d2cura2 d1x62a2 d1op9a\_ d1y01a1 d1letzb1 d1legj11 d2gsib1 d1nj9a1  
d4jfhdl d1aqk11 d1t2ja\_ d1l04h1 d1zvya1 d3v4v11 d4enec1 d1kxtb\_  
d5e8ea1 d2pxya\_ d4weud\_ d1xiwc\_ d2esvd1 d1qnzh\_ d1logae1 d1f4xh1  
d4n1hb\_ d3ezjb1 d3mlw11 d1kfah1 d1letza1 d1b4jh1 d3cfic\_ d4w68a\_  
d2arja1 d1ek3a\_ d2ok011 d1vera\_ d1uwgh1 d1blnb1 d1fpth1 d1rzga1  
d2giya1 d4m3kb1 d1nc2a1 d2nyyd1 d1ncna\_ d1fbih1 d5dxwa\_ d4fqqa1  
d1dqdh1 d1jfq11 d1kelh1 d1faih1 d1frgl1 d1figl1 d4m6n11 d1fo0a\_  
d4hxb11 d3b5ga\_ d3quyd1 d2h9gb1 d1i8kb\_ d2dd8h1 d2ck0h1 d1eaja\_  
d4w6wb1 d2a6ib3 d1t66d1 d2e27h\_ d1ob1b1 d1f11b1 d2v7na1 d1ad0a1  
d2xt1b1 d1pskh1 d4i13b1 d2op411 d1a0q11 d1uwel1 d1za3a1 d1ncb11  
d4uu9a\_ d1bm3h1 d1cloh1 d1nqba2 d1cf8h1 d4y5va\_ d1mhph1 d5anma1  
d4cdgc1 d4ldeb\_ d1y01b1 d2pcpb1 d1z3gl1 d1dfb11 d1fh5h1 d3g5xa1

d1tzib1 d4dn3l1 d3zhka1 d2b1hh1 d2uyla1 d1f3dh1 d1nj9b1 d2agjh1  
d2h1pl1 d1q72h1 d8fabb1 d1ndmb1 d1rjca1 d4u6hb1 d3upca\_ d2fbj11  
d1osph1 d1tvda\_ d2cjev\_ d4fhbd1 d1bd2d1 d1rz7h1 d3nn8a\_ d1blna1  
d1knoa1 d1nfda1 d2bmkb1 d1dq11\_ d1igyb1 d1igfl1 d12e8h1 d3utza1  
d1nc2b1 d1rihh1 d4mwfb1 d4jvpa1 d1mieh1 d1rhfa1 d1fgn11 d1sbsh1  
d1lp9e1 d1dn0a1 d4lqf11 d1iaih1 d1kgcd1 d1mh5b1 d1gpol1 d2g60h3  
d1f8t11 d2jixd1 d4grwh\_ d1fo0b\_ d1bfob1 d1axsa1 d1u9ka\_ d1nmbh\_  
d1h8na1 d1h8na2 d1jguh1 d4eura1 d3sdy11 d35c8h1 d1w72l1 d1mvub\_  
d1i9rh1 d1ob1a1 d4wenb\_ d1yeeh1 d3ietc1 d1f58h1 d1ad0b1 d1mqkl\_  
d1nbvh1 d4b50a\_ d3r8bb\_ d1baf11 d1mamh1 d4rgne1 d2gsgb\_ d35c8l1  
d1bafh1 d1ai1h1 d2pcpa1 d2fath1 d2x1pa\_ d1orsb1 d1libgl1 d1shma\_  
d1a2yb\_ d1u0qa\_ d2coqa\_ d1hilb1 d1qfwi\_ d1jv5b\_ d1fn4b1 d5e0qa\_  
d1nsnh1 d1plgl1 d4ocxl1 d1kb5h1 d1rzhf1 d1pg7x1 d2fx7h1 d2oi9c\_  
d1l7i11 d3eyva1 d1d5i11 d4ffyl\_ d1tet11 d1a6wh\_ d1ac6a\_ d3dvfa\_  
d1nfde1 d1mimh1 d1ri8a1 d1jhlh\_ d3dura\_ d1fskb1 d1f97a1 d3so3b1  
d2ak4d1 d1lp9f1 d4z7wf1 d1l7th1 d4y5ya\_ d4x7ec1 d1emth1 d1ikfl1  
d1nlbh1 d4utal1 d1bjma1 d1eapb1 d1u6ah1 d2dtgd1 d1kj2b\_ d1xeda1  
d1cleh1 d1fgvh\_ d2bnub1 d2fb4h1 d2dtgb1 d1ktrh\_ d1jpth1 d1qkz11  
d4hepg\_ d2atpb1 d1flrh1 d2hrpl1 d1mvfa\_ d1iaim1 d3k80a1 d2jb5h1  
d3zkxc\_ d4grwe\_ d1it9h1 d1rhhb1 d3w9ec\_ d1e4wh1 d1sy6h1 d2j6eh1  
d3qxta\_ d1jglh1 d1p7ka1 d1tzhb1 d4n8pa1 d1gaf11 d2jelh1 d1wioa2  
d4i0cc1 d1cicb1 d1lmka2 d1lmka1 d1iqwh1 d1orqb1 d1ejoh1 d1jnlh1  
d4zg1a\_ d43c9b\_ d1ggbl1 d1wejh1 d3q6fa1 d1f3dj1 d3c6la1 d1bqlh1  
d3p9wb\_ d1a3r11 d1h0db1 d2uzil\_ d1eo8l1 d1qfwl\_ d1n7ml1 d1igja1  
d1c5ch1 d2a9mh\_ d1rmfh1 d1fj1b1 d4heme\_ d1ccza1 d1a5fh1 d1ogad1  
d1dlfh\_ d1qa9b\_ d1vgel1 d3qskb\_ d1sjxa\_ d4ozfg1 d1sq2n\_ d1qd0a\_  
d1kcvh1 d1c5db1 d3qcull d8faba1 d3bn9d1 d1mjuh1 d4y8dc\_ d7fabh1  
d3dvgb1 d1lo0l1 d1a6tb1 d1gigh1 d1kcrh1 d2hwz11 d1yjdc1 d3clfl1  
d4krna\_ d1dl7l\_ d1e6ol1 d1mexh1 d3r0ma\_ d4kkna\_ d1fns11 d1loaqh\_  
d1rzia1 d1lucb1 d1ncw11 d4b41a\_ d1nfd11 d2mpah1 d2d7t11 d4grwf\_  
d4b5ea\_ d1l1k3h1 d3u79a\_ d4u3xa\_ d1ghf11 d1bvkb\_ d1mcww1 d1b88a\_  
d1jrhh1 d32c2b1 d4wemb\_ d1dsfh\_ d1op3h1 d1ce111 d1iqda1 d1qoka1  
d1qoka2 d1qfuh1 d2crya1 d1ay1h1 d1oaql\_ d3ab0b\_ d1rurl1 d1t4kb1  
d1bz7b1 d1n0xh1 d1for11 d1lucb1 d4w6yb\_ d43c9a\_ d2aab11 d1tzia1  
d4n1ca\_ d1k6qh1 d3g9ab\_ d4tvsa1 d1ligmh\_ d1pz5b1 d3dx9a1 d3wxwh\_  
d1nakh1 d1kcul1 d3eaka\_ d4qlra1 d1cr9l1 d1d9ka\_ d1f4x11 d1deea1  
d2i27n2 d1c12a1 d2orb11 d1j8hd1 d1mcp11 d1c5da1 d1kenh1 d1bd2e1  
d1h5ba\_ d4x7fc1 d3upaa\_ d1t3fa1 d1indh1 d2dtgc1 d4hc111 d1zv5a1  
d4wgvb\_ d1uwgl1 d4f37k1 d1aqkh1 d1vesa\_ d3zkqd\_ d1fpt11 d1lo4l1  
d1knob1 d3rrqa\_ d1ct8b1 d4orz\_ d1mlbb1 d4hgkc1 d1dqdl1 d1bogb1  
d4ozhe1 d1dr9a1 d1i7za1 d1dn0b1 d1kell1 d1rzib1 d1ypzf1 d1wtla\_  
d1hkfa\_ d1fail1 d1figh1 d2vyre\_ d1sjva\_ d1ohqa\_ d1bfoa1 d1pkqb1  
d1mjul1 d1b4jl1 d1nsn11 d2arjb1 d1p4bh\_ d4aj0a\_ d3nn8b\_ d2rcja1  
d1f2xk\_ d4v1dd\_ d1adqh1 d2eksa\_ d4k3ga\_ d1jfqh1 d1uweh1 d1frgh1

d4gftb\_ dluz8b1 d4n1ea\_ d1bm3l1 d1cl0l1 d3mcka1 d2vq1a1 d1ae6h1  
d4aq1b1 dluj3b1 d1nbqa1 d1fh5l1 d2ck0l1 d2ywza\_ dlq72l1 d4nxbx\_  
d1hila1 d4hz1b1 d2j88l1 d1zmya1 d1cd0a\_ d1a4ka1 d1pskl1 d1a0qh1  
d4krmb\_ d1ncbh1 d2fbjh1 d1j8he1 d1i3ua\_ d1cf8l1 d1fe8h1 d2p1ya1  
d1eeqa\_ d2x89a\_ d1o10a\_ d2r0lh1 d1ub5a1 d1dfbh1 d3eyvb1 d4jdvb1  
d4p2cg\_ d2gsia1 d2agjl1 d1u3ha1 d2h1ph1 d1rihl1 d1fskc1 d1boga1  
d2a77l1 d1ospl1 d1qfoa\_ d3dwta\_ d2fx7l1 d1rz7l1 d3stba1 d1pkqa1  
d1b6da1 d1dzba2 d1dzba1 d1kj2a\_ d4l1ha\_ d1rzgb1 d1dq1h\_ d12e8l1  
d1miel1 d1jmaa\_ d1sbsl1 d1fgnh1 d1f58l1 d1mqkh\_ d1ndgb1 d3qegl1  
d1iaill1 d2aw2a1 d1tqbc1 d3fo2a1 d4dkaa\_ d1f8th1 d2g60l1 d2ywy\_  
d1uj3a1 d1yc7a\_ d3bd3a\_ d4w6xb1 d1nmb1\_ d1i8ka\_ d1rjlb1 d1ypzel  
d1p7kb1 d1kxqe\_ d1gpoh1 d2z4qa1 d1w72h1 d1i9rl1 d4qgya1 d4xt1c\_  
d2qqnh1 d1cica1 d3c08h1 d2cd0a\_ d2bdnh1 d1hnga1 d1mam11 d1nldh1  
d1cr9h1 d4lcih1 d3bkyh1 d3qg7l1 d1ai1l1 d1kxvc\_ d4iosd\_ d1l7ih1  
d2x1qa\_ d1ub6b1 d3k74b\_ d1ibgh1 d1teth1 d1igya1 d1hxma1 d2x6ma\_  
d2e7la\_ d5e03a\_ d1qfwm\_ d2r0kh1 d1igjb1 d1rurh1 d1plgh1 d1mj8h1  
d1yuhb1 d3fmg11 d1rzfl1 d1emtl1 d1ad9b1 d1igtb1 d1nlbl1 d1d5ih1  
d3k7ua\_ d4ffyh\_ d1bwwa\_ d3dvga1 d1a6ta1 d1fgvl\_ d4qxgl1 d1mim11  
d1jh1l\_ d2hffb1 d2hh0l1 d1qkzh1 d1l7tl1 d1afvh1 d1iaii1 d2cjuh\_  
d1um5h1 d2ghwb2 d2ghwb1 d1kgce1 d2fgwh1 d1ikfh1 d1dvfd\_ d2i24n1  
d2xtjb\_ d1za3b1 d2ycla\_ d2hh0h1 d2x1oa\_ d1bvka\_ d1rjla1 d5e7ba1  
d1igta1 d1il1b1 d2fb4l1 d1mvua\_ d1jptl1 d32c2a1 d1fvca\_ d1iqdb1  
d2hrph1 d2p4ab\_ d4qo1a\_ d1p2cb1 d1wt5c\_ d1t4ka1 d5c1mb\_ d1it9l1  
d1bz7a1 d1b2wh1 d1e4wl1 d1jnl11 d1za6b1 d3u7aa\_ d1igfh1 d3gnml1  
d1orsa1 d1wejl1 d1a2ya\_ d1hxmb1 d1gafh1 d2j4wh1 d1pz5a1 d1j05a\_  
d1a3rh1 d4fq1l1 d1qfwh\_ d1eo8h1 d1n7mh1 d4s11a\_ d1kegh1 d5da4a\_  
d1iqwl1 d3whxb1 d1vgeh1 d1deeb1 d1c12b1 d1t2ql1 d1ad9a1 d3gsnb1  
d3b2uc1 d1ggbh1 d1t3fb1 d1nakl1 d4ocmc\_ d1lila1 d2v7hb3 d2esve1  
d1mcoh1 d2qr0b1 d2q3aa\_ d1ct8a1 d1kcr11 d2pxyb\_ d2uzih\_ d5c3ld\_  
d3durb\_ d1c5cl1 d2ak4e1 d1d17h\_ d1xiwd\_ d1mlba1 d1rmfl1 d1i7zb1  
d1dlfl\_ d2xa3a\_ d5bq7b1 d1dqqb1 d3h42l1 d1egjh1 d1kcvl1 d1fe8l1  
d2j6e11 d1f3rb2 d1l1k3l1 d1sm3h1 d1q0xh1 d1ghfh1 d7fabl1 d1igch1  
d1l00h1 d4idla\_ d5c2bl\_ d1jrh11 d1l11a1 d3zhda1 d4kfzc\_ d1b0wa\_  
d1e6oh1 d1mexl1 d4krpb\_ d1fnsh1 d1ncwh1 d4hgma\_ d4eigb1 d4rzca\_  
d2mpa11 d4y5xa\_ d5en2b1 d3lrga1 d4ej1c1 d1rhha1 d1j05b\_ d1forh1  
d1q9wb1 d2wzpd\_ d2aq2a1 d1h0da1 d3revb1 d2ij0c1 d1tzha1 d4m7jl1  
d1k6ql1 d3b9kc1 d1igml\_ d3qeua1 d1dsfl\_ d1ce1h1 d1kcuh1 d1zvha1  
d1zvoa1 d1tqbb1 d1ay1l1 d2qscl1 d2cgrh1 d1nl0h1 d1kenl1 d3eo0a1  
d4n9ob1 d1n0xl1 d3k1kc\_ d1prtcl1 d2wv6d\_ d1prtfl\_ d1l1trd\_ d4l63b1  
d1r4pb\_ d1prtd\_ d1t10f\_ d2bosa\_ d1prtb1 d3chbd\_ d2cqva1 d1fhga\_  
d2k1ma\_ d2d12a1 d1biha3 d1biha1 d1biha4 d3qp3a1 d1glca\_ d1gxea\_  
d1cvsc2 d1cvsc1 d1xmwa2 d1m4ka2 d2otpa2 d1biha2 d1rhfa2 d2fcba2  
d2fcba1 d1wwbx\_ d1gsma2 d1lepfa1 d1lepfa2 d2dava1 d1waaa\_ d1f97a2  
d1x44a1 d1vcaa2 d1fnla2 d1fnla1 d3b5ha2 d3h8na2 d3h8na1 d1bjba1

d1bjja2 d1pd6a\_ d1f2qa2 d1f2qa1 d3cx2a\_ d1nbqa2 d3b5ha1 d1n26a1  
d1xiwb\_ d1xaua\_ d1fltx\_ d2ifga1 d1olla1 d1olla2 d1cs6a4 d1cs6a3  
d1cs6a2 d1cs6a1 d2gw5a2 d1sy6a1 d1xiwa\_ d1lucta2 d1lucta1 d1ry7b2  
d1gl4b\_ d1qz1a3 d1olza1 d2c9aa1 d1wwca\_

**Family-93 (g.14.1.1)**

**Positive dataset contains 6 protein sequences.**

d4iuaa3 d4bvva\_ d3k65a\_ d1ki0a1 d3sp8a3 d2feba1

**Negative dataset contains 4090 protein sequences.**

d1libja\_ d1c7na\_ d1iuga\_ d4q75a\_ d2bkwa1 d1t3ia\_ d1n8pa\_ d1qz9a\_  
d1jff9a\_ d1eg5a\_ d1p3wa\_ d3kgwa\_ d1c11a\_ d2ctza1 d1vjoa\_ d2rfva\_  
d1gc0a\_ d1cs1a\_ d1d2fa\_ d2ch1a1 d1qgna\_ d1pffa\_ d1elua\_ d1tq5a1  
d1sefa\_ d1sfna\_ d1sq4a\_ d1jx4a2 d3gv5b1 d1t94a2 d3bq0a2 d1js3a\_  
d3rcha\_ d3k40a\_ d2cfba1 d1dfoa\_ d1o69a\_ d1bj4a\_ d3k28a\_ d2bwpa\_  
d3lg0a\_ d2fnua\_ d3ou5a\_ d1z7da1 d1b9ha\_ d1iaya\_ d4msoa\_ d1bs0a\_  
d1s0aa\_ d1sffa\_ d3tqxa\_ d3qboa\_ d3pgya\_ d1bjna\_ d2dkja\_ d1ejia\_  
d1vefa1 d4wxga\_ d3bs8a\_ d3gbxa1 d1w23a\_ d1u08a\_ d1lc5a\_ d1b5pa\_  
d2ay1a\_ d1bw0a\_ d3pd6a\_ d7aata\_ d2csta\_ d1j32a\_ d4wlha\_ d1o4sa\_  
d1v2da\_ d1gdea\_ d1m6sa\_ d1v72a1 d1svva\_ d1ajsa\_ d1wsta1 d2f8ja2  
d1lk9a\_ d1vp4a1 d1xi9a1 d2gb3a1 d1yaaa\_ d1ddla\_ d1e57b\_ d1auyb\_  
d1fwxa1 d1libya\_ d1f56a\_ d1bypa\_ d1azca\_ d1ws8a\_ d3u25a\_ d1cuoa\_  
d1lid2a\_ d1rkra\_ d2iaac\_ d4dp1x\_ d2gima\_ d2i7sa\_ d1qhqa\_ d3ehbb1  
d1fftb1 d1gyca3 d1hfua2 d1kbva1 d1kbva2 d1sdda1 d1sdda2 d1gyca1  
d1gyca2 d1mzya1 d2bw4a1 d1aoza1 d1aoza3 d1aoza2 d1kyaa2 d1kyaa3  
d1kyaa1 d1mzya2 d4e9sa1 d1sddb1 d1sddb2 d1hfua1 d1hfua3 d1oe1a2  
d1oe1a1 d1v10a2 d1v10a3 d1v10a1 g1f8v.1 d1novc\_ d2bbvc\_ d1xkta1  
d2hfka\_ d5d3ka\_ d1iknc\_ d3brda1 d1p7h11 d1oy3c\_ d1imhc1 d1gjia1  
d1zk9a1 d2cxka1 d2bema\_ d1pama1 d1qhoa1 d2fhfa2 d2fhfa1 d1k3ia1  
d1j0ha1 d1cx1a1 d2bhua1 d1edqa1 d1f1sa2 d1ut9a2 d1gvia1 d1txka1  
d1adqa1 d1fnga1 d1uvqb1 d1zs8a1 d2vola1 d2vola2 d1mfb12 d2jelh2  
d1uwe12 d3qq4b1 d1kjob\_ d1k5na1 d1osph2 d4odh12 d1ow0a1 d1ow0a2  
d1bfob2 d3l9ra2 d3jttth1 d2fath2 d4elkb2 d1fn4b2 d2xfxb\_ d1pg7x2  
d1cqka\_ d4k71b2 d1lk2a1 d1eapb2 d4lfhg2 d1i4fa1 d2nw2a2 d1kfah2  
d1mhca1 d1h3ua1 d1wejh2 d1h0db2 d1a5fh2 d1kcvh2 d1mjuh2 d1qqda1  
d1kcrh2 d1k8ia1 d3huja2 d2nnab1 d1nfd2 d3mffb2 d1s9va1 d1lk3h2  
d1q0x12 d1fv1b1 d1neza1 d4rfeb2 d1r3ha1 d1a6tb2 d1kjva1 d1pz5b2  
d1onqa1 d2bc4a2 d1de4a1 d1k8da1 d1tcra2 d1dn0b2 d1nfde2 d2xwtb2  
d1bfoa2 d1mexh2 d1iakb1 d1ypzf2 d4f7ea2 d1q7212 d2fbjh2 d1fe8h2  
d1clzh2 d1fngb1 d1uvqa1 d1vgka1 d1c16a1 d4j12a2 d4x99b2 d1igtb3  
d1je6a1 d1q72h2 d1nldh2 d1teth2 d2hmic2 d1ilca2 d1ilca1 d1k8ib1  
d1q0yh2 d1kfa12 d3frua1 d1pg7w2 d1u58a1 d1igyb4 d1igyb3 d1hyrc1  
d1klub1 d1deeb2 d1c12b2 d2bc4b2 d2ig2h2 d1kcv12 d3wn5b1 d1lk2b\_  
d1lk3l2 d1mjul2 d1sm3h2 d1q0xh2 d1zvsa1 d1ydp1 d1u8ib2 d1ypze2  
d1kcu2 d1zx5a1 d2phla2 d2phla1 d1fxza2 d1fxza1 d1lrrha\_ d1uija1  
g1dgw.1 d2v09a\_ d1uika2 d1uika1 d1dgwa\_ d1lep0a\_ d2pa7a1 d1wlta1

d2c0za1 d1fstb\_ d1ex0a1 d1g0da1 d2b5ea2 d2b5ea3 d2b5ea1 d2b5ea4  
d2kpl1a1 d2kp2a1 d1hyua3 d1hyua4 d1j08a1 d1j08a2 d2bjca1 d2hsga1  
d1qpza1 d1ydwa2 d2nvwa2 d1zh8a2 d1qkia2 d1xeea2 d1t1ta2 d1e3oc2  
d1lic8a2 d3gpdg2 d2q49a2 d1hdgo2 d2g17a2 d2cvoa2 d2czca1 d3pwka2  
d1obfo2 d1i32a2 d1zyao2 d2pkqo2 d1b7go2 d2hjsa2 d1cf2o2 d1vkna2  
d1nvm2 d1ux8a\_ d4i0va\_ d2bkma\_ d1dlwa\_ d2bmma\_ d2msya\_ d2djoa1  
d2r5za\_ d1au7a1 d1f43a\_ d2lmda1 d1akhb\_ d1s7ea1 d3nara\_ d1zq3p1  
d2craa1 d1mija\_ d4uuta\_ d3a01a\_ d1x58a1 d3rkqa1 d3cmya1 d2cqxa1  
d2da6a1 d1e3oc1 d1fjla\_ d1mh3a1 d1ig7a\_ d1x41a1 d1wh7a1 d1gt0c1  
d2mw8a\_ d1lfup\_ d1x2ma1 d1b72a\_ d1wi3a1 d1jgga\_ d1wjha1 d1x2na1  
d1mnm\_ d2cuea1 d3k2aa\_ d2hosa\_ d2jwta2 d1pufa\_ d1octc1 d2hi3a\_  
d1b8ia\_ d4j19a\_ d3lnqa\_ d1wh5a1 d1b8ib\_ d1fexa\_ d2cqra1 d1guua\_  
d1ug2a1 d2cqqa1 d2ajea1 d4a69c\_ d1h8ac1 d2crga1 d2iw5b1 d1xc5a1  
d1ofcx1 d2cu7a1 d1wgxa1 d2cjja1 d2ckxa1 d1gvda\_ d1tc3c\_ d1gdta1  
d1u78a2 d1hlva1 d1iufa2 d1iufa1 d1igna1 d3lv8a\_ d1s3ga1 d1zaka1  
d1s4qa\_ d3tvta2 d1uf9a\_ d1khta\_ d1ckea\_ d1osna\_ d1p5zb\_ d4tmka\_  
d3cm0a\_ d1tmka\_ d1jaga\_ d3h86a\_ d1t0hb\_ d1nn5a\_ d2h92a\_ d3kb2a1  
d2c95a1 d1yj5a2 d1kgda\_ d1ly1a\_ d2ak3a1 d1vyva2 d1deka\_ d2grja1  
d1p3ja1 d1y63a\_ d1e4ya1 d1s96a\_ d3iija1 d1lvga\_ d1nksa\_ d1vyua2  
d4e22a\_ d1qf9a\_ d1jjva\_ d1q3ta\_ d1ki9a\_ d1lw7a2 d1teva\_ d1kjwa2  
d2iyva2 d1viaa\_ d1e6ca\_ d1x6va3 d1g3ma\_ d1j99a\_ d1t8ta1 d1nsta\_  
d1fmja\_ d1zrha\_ d1ls6a\_ d2a3ra\_ d1aqua\_ d2zptx\_ d3ckla\_ d1texas\_  
d1q44a\_ d2gwaha\_ d1odfa\_ d4gi7a\_ d2jeoa1 d1rz3a\_ d1z0ja1 d3umra2  
d3gj0a1 d2gaoa1 d1yzga1 d1x3sa1 d1g7sa4 d1puja\_ d1udxa2 d1kk1a3  
d2o52a\_ d1jwyb\_ d1zcaa2 d1zcba2 d2fv8a1 d2cjwa\_ d3dz8a1 d1xzpa2  
d1vg8a\_ d4qxaa\_ d2ew1a1 d1x1ra1 d2bcgy\_ d3doea1 d3cona\_ d3rega\_  
d3wyga\_ d1upta\_ d2b6ha1 d1zd9a1 d1lnza2 d1r5ba3 d1n0ua2 d1r2qa\_  
d2f91a1 d2rhda\_ d3q3jb\_ d3q85a\_ d1efma1 d1r8qa\_ d2gf9a1 d2akab1  
d1ek0a\_ d1z08a1 d2gcoa1 d2dy1a2 d4g01b\_ d2cxa1 d1svia\_ d3q72a\_  
d1ni3a1 d4ac9a4 d2erxa1 d2bmea\_ d1wxqa1 d2gf0a1 d4ldja1 d1zunb3  
d1d5ca\_ d4lv5b\_ d1efca3 d1kmqa\_ d2g6ba1 d3lrpa\_ d1tada2 d2y8ea\_  
d4rd4a1 d1z06a1 d2heia\_ d3a58b\_ d1u01a2 d1d2ea3 d1zj6a1 d2ocba\_  
d3rwoa\_ d1mr3f\_ d2e9sa1 d4u5xa1 d2iwra\_ d2fn4a1 d3bwdd\_ d2nzja1  
d2atva1 d2ksqa\_ d3l43a\_ d1mkya2 d1mkya1 d1wmsa\_ d1jn3a3 d2rmka\_  
d1f6ba\_ d1f60a3 d1gota2 d1jala1 d2fh5b1 d1g16a\_ d2wblc\_ d1m7ba\_  
d1wf3a1 d1f5na2 d1t9ha2 d1z6xa1 d1z0aa1 d2fg5a1 d2a5ja1 d2bcjq2  
d1s0ua3 d1ky3a\_ d4y0va\_ d4lhwa\_ d2qmea1 d2atxa1 d1legaa1 d1ryha\_  
d1moza\_ d1nrjb\_ d2erya1 d3bfka\_ d1puia\_ d1fzqa\_ d3j3az1 d3t5ga\_  
d1shza2 d3defa\_ d2f7sa1 d3raba\_ d3tsoa\_ d3aq4a\_ d2a17a1 d3sfva1  
d3bc1a\_ d2ncda\_ d1sdma\_ d3h4sa1 d2heha\_ d2grya\_ g3kin.1 d1kk8a2  
d1br2a2 d1goja\_ d1f9va\_ d2mysa2 d1lkxa\_ d3t0qa\_ d4db1a1 d3gbja\_  
d1ry6a\_ d1v8ka\_ d1vava\_ d1uaia\_ d1k8ka2 d1k8ka1 d3uleb1 d3i33a2  
d3i33a1 d1bupa1 d1dkgd2 d4ci6a2 d1jcf1a1 d4a2ba2 d2fxua1 d1yaga2  
d1yaga1 d4cbua2 d1bupa2 d3vrda1 d3vrda2 d1fcdc2 d1fcdc1 d1h1oa1



d1m70a2 d1m70a1 d1ig8a1 d1czan2 d1czan3 d1czan1 d1ig8a2 d1czan4  
d1bg3a4 d1bg3a3 d1bg3a1 d1nira1 d1qksa1 d3h1jd1 d2d0oa3 d2d0oa2  
d1nbwa2 d1hroa\_ d4gedb\_ d3zooa\_ d1mz4a\_ d1gu2a\_ d1f1fa\_ d1dvva\_  
d1c6ra\_ d1c75a\_ d1e29a\_ d1gdva\_ d1cnoa\_ d1h32b\_ d1co6a\_ d2bh4x\_  
d2aiua\_ d5cytr\_ d1jdl\_ d1i8oa\_ d2zboa\_ d3dmia\_ d1ls9a\_ d1wvec\_  
d2yk3a\_ d3ph2b\_ d1dw0a\_ d5aura\_ d1ql3a\_ d1qn2a\_ d1f1ca\_ d4zzva\_  
d2xspa\_ d1eg1a\_ d4v20a\_ d1ojja\_ d4ipma1 d1gpia\_ d4csia\_ d3pfza\_  
d2yoka\_ d2nqya\_ d1h4ga\_ d1hixa\_ d1oa2a\_ d1olra\_ d3b7ma\_ d4h7ma1  
d3wp3a\_ d2vgda\_ d1igoa\_ d3zsea\_ d2nlra\_ d3wx5a\_ d1oa3a\_ d1pvxa\_  
d1m4wa\_ d1f5ja\_ d1oa4a\_ d1ks5a\_ d4ixla1 d2a6za1 d3a4ua\_ d2a6va1  
d1evsa\_ d1pvhb\_ d1z7ca\_ d1huwa\_ d1bgea\_ d1rhga\_ d1f6fa\_ d1f45b\_  
d1ilrb\_ d1axia\_ d1etea\_ d3tgxb\_ d1scfa\_ d2z3qa1 d3qb1a\_ d1hula\_  
d1m48a\_ d4nkqb\_ d1eera\_ d1v7mv\_ d5e4ea\_ d2o27a\_ d3b5ka\_ d2psma1  
d4zf7a\_ d3uf5a\_ d4x51a\_ d1d9ca\_ d4ypgc1 d3oq3a\_ d1lqsl\_ d1n1fa\_  
d1au1a\_ d1wu3i\_ d3bes1\_ d3ux9a\_ d3rbaa\_ d2qtra\_ d1nupa\_ d3l92a\_  
d1f9aa\_ d1qjca\_ d2h29a\_ d1vlha\_ d1od6a\_ d1lw7a1 d4ruka\_ d3wdpp1  
d3wq5a\_ d1gnxa\_ d4gxpa\_ d4hz8a\_ d1e4mm\_ d3aiua\_ d1wcga1 d1qvba\_  
d3ahxa\_ d1v02a\_ d2dgaa\_ d1pbga\_ d1vffa1 d1qoxa\_ d4ha4a\_ d2el7a\_  
d1iq0a2 d1irxa2 d1r6ta2 d1ivsa4 d2cyba\_ d1rqga2 d1j09a2 d2yxna\_  
d1f7ua2 d1h3fa1 d1ffya3 d2g36a1 d1jila\_ d1n3la\_ d1i6la\_ d1pfva2  
d1h3na3 d3n9ia\_ d3sz3a1 d1m4la\_ d2bk7a\_ d3fjua\_ d1z5ra1 d1kwma1  
d1uwya2 d1jqga1 d2c1ca1 d1dtda\_ d1cwva5 d3sw2a\_ d1moxc\_ d1dx5i3  
d1edmb\_ d1aut12 d1aut11 d1nqlb\_ d1dval1 d1szba2 d1kigl\_ d2y5fl\_  
d1ijqa2 d1gk5a\_ d1g1sa2 d1nt0a3 d1xdtr\_ d1lmja2 d1lmja1 d1nzia2  
d2wphe\_ d1klil\_ d1pfxl2 d1pfxl1 d1p9ja\_ d1g1ta2 d1f7ea\_ d4yzub\_  
d2mgpa1 d1b9wa1 d2mgpa2 d1ob1c1 d1ob1c2 d1n1ia2 d1n1ia1 d2npra2  
d2npra1 d1m1xb4 d2y5ia\_ d1qlsa\_ d1psra\_ d3n22a\_ d2egda\_ d4ggfc\_  
d2wcea\_ d2luca\_ d4aqia\_ d3nsia\_ d2lp3a\_ d1j55a\_ d1a4pa\_ d1k8ua\_  
d1nsha\_ d1pvaa\_ d3fs7a\_ d2pvba\_ d1ttxa\_ d1rwya\_ d2kyfa\_ d1rk9a\_  
d1a75a\_ d1exra\_ d1tiza1 d1nyaa\_ d1g8ia\_ d1ggwa\_ d1wdcc\_ d3fwba\_  
d1ggza\_ d2o5ga\_ d1ctaa\_ d1m45a\_ d3i5gc\_ d1sl8a\_ d1fpwa\_ d2scpa\_  
d2roaa\_ d4aqra\_ d3pn7b\_ d1br1b\_ d2mysb\_ d1s6ca\_ d1bjfa\_ d2obha\_  
d1jfka\_ d1jf0a\_ d1qv0a\_ d1lkja\_ d2mlfc\_ d2m97a\_ d2d8na\_ d4by5a\_  
d1jbaa\_ d4nqga\_ d2mysc\_ d1j7qa\_ d1s6ia\_ d1uhka2 d1r2ua\_ d1dtla\_  
d3kf9a\_ d3pn7c\_ d5d67d\_ d1tuza\_ d1h8ba\_ d1eg3a1 d2zkmx1 d1snla\_  
d1gjya\_ d1y1xa\_ d1hqva\_ d1dvia\_ d1df0a1 d1qxp2 d4usla\_ d1k94a\_  
d1jfxa\_ d1wkya2 d1uuqa\_ d3wh9a\_ d4m1ra\_ d1xyza\_ d4xuya\_ d2je8a5  
d4bf7a1 d3cuia\_ d1ur4a\_ d1qw9a2 d1odza\_ d2vzsa5 d1bqca\_ d2x2ya1  
d1hjqa\_ d1qnra\_ d4y7ea1 d1vjza\_ d4k68a\_ d2v3ga\_ d4hpga\_ d1nofa2  
d1nq6a\_ d1h4pa\_ d1aq0a\_ d3ziza\_ d4bs0a\_ d1ecea\_ d1h1na\_ d1ta3b\_  
d1w91a2 d1ilwa\_ d1uhva2 d1egza\_ d7a3ha\_ d1tvna1 d3nyda1 d1ghsa\_  
d2cyga1 d4xv0a\_ d2c8na2 d1w32a\_ d3emca\_ d1v6ya1 d1foba\_ d2uwfa1  
d2fgla\_ d3niya1 d2c0ha1 d1rh9a1 d1yq2a5 d1szna2 d1fa2a\_ d1pama4  
d5do8a1 d1ea9c3 d1hx0a2 d2fhfa5 d1qhoa4 d1avaa2 d1m53a2 d4m8ua1

d2gjpa2 d1lwaha2 d4howa1 d1ktba2 d1j0ha3 d3vm5a1 d2x1ia\_ d1wzaa2  
d1uasa2 d2diea1 d1mxga2 d1ht6a2 d1eswa\_ d1iv8a2 d5cpsa\_ d1ud2a2  
d1zjaa1 d3gbea1 d1kwga2 d1wdpa\_ d1gcya2 d1g5aa2 d1hvxa2 d3dhpa2  
d2bhua3 d4do4a1 d3qgva1 d1e43a2 d1g94a2 d2d3na2 d1gjwa2 d1gvia3  
d1x1na1 d1r7aa2 d1tz7a1 d4toqa\_ d1wb0a1 d1w9pa1 d1eoka\_ d1itxa1  
d1kfwa1 d1goia2 d1ledqa2 d2gsja\_ d1jnda1 d1vf8a1 d1etob\_ d1lumqa\_  
d1g2ha\_ d2w0pa\_ d2diaa1 d2e9ia2 d2e9ja1 d2dj4a1 d2eeba1 d2diba1  
d2dmba1 d2dmca1 d2d7oa1 d2ee6a1 d2d7pa1 d2eeaa1 d2di8a1 d1wlha1  
d2d7na1 d2nqca\_ d2d7ma1 d2dica1 d3cnka\_ d2k3ta1 d2eeca1 d1qfha1  
d1qfha2 d2bp3a1 d1v05a\_ d2ee9a1 d2eeda1 d2di9a1 d3syxa1 d1mkea1  
d2p8va\_ d1xoda1 d1i7aa\_ d1evha\_ d1qc6a\_ d1legxa\_ d2hmta\_ d1lssa\_  
d2v76a\_ d1wj1a1 d1aqca\_ d1qqga2 d1qqga1 d1ntva\_ d1n3ha\_ d4dbba\_  
d3f0wa1 d1p3ra\_ d1wgua1 d2cy4a1 d3hqca\_ d1wvha1 d1xr0b1 d1wgqa1  
d1v89a1 d2coda1 d1zc3b\_ d1wg7a1 d1u5ea1 d1v61a1 d2coca1 d2ys1a1  
d1v5pa1 d1ntya2 d1wjma1 d1wi1a1 d1u29a\_ d1xx0a1 d1unqa\_ d2zkmx3  
d1fhoa\_ d1v88a1 d2adza1 d1x1fa1 d1p6sa\_ d2coaa1 d1btka\_ d1v5ma1  
d1faoa\_ d2x18a\_ d1dyna\_ d1x1ga1 d4kaxb\_ d2j59m1 d1kilb2 d1xcga2  
d1txda2 d1u5da1 d1dbha2 d1wlha\_ d1upqa\_ d1v5ua1 d2fjla1 d1eaza\_  
d2dfka2 d2cofa1 d1kz7a2 d9ldta1 d2ewda3 d1up7a1 d2dfda1 d1s6ya1  
d1vjta1 d7mdha1 d1hyea1 d1t2da1 d1ojsa3 d1b8pa1 d1ldna1 d1hyha1  
d1civa1 d2a92a1 d1ez4a1 d1i0za1 d1y6ja1 d1gv0a1 d1ur5a1 d1llda1  
d1obba1 d1v8ba1 d1gdha1 d1l7da1 d2dlda1 d1mx3a1 d1ygya1 d1qp8a1  
d1li4a1 d1j4aa1 d2naca1 d1npya1 d3t4ea2 d1a4ia1 d1o0sa1 d2hk9a2  
d2egga2 d1b26a1 d1bvua1 d1gq2a1 d1clda1 d1leha1 d1gtma1 d1euzal  
d3dona2 d1ledza1 d1gpja2 d1vi2a1 d1p77a1 d1nyta1 d1b0aa1 d1vl6a1  
d1v9la1 d1txga2 d3f47a1 d1mv8a2 d2pv7a2 d1xc2a3 d2ahra2 d4xiya1  
d2f1ka2 d1pgja2 d1i36a2 d1np3a2 d1lj8a4 d1teaa3 d1qmga2 d2i76a2  
d2g5ca2 d1wdka3 d1dlja2 d3cuma3 d1kola2 d1f8fa2 d1qora2 d1jqba2  
d1vj0a2 d1cdoa2 d1gu7a2 d1dlta2 d1xa0a2 d2dm6a2 d1jvba2 d1rjwa2  
d1llua2 d1h2ba2 d1tt7a2 d1piwa2 d1o89a2 d1iz0a2 d1e3ja2 d1yb5a2  
d1uufa2 d1vj1a2 d1e3ia2 d3gpdg1 d1vc2a1 d2nvwa1 d1u8fo1 d1ydwa1  
d1hdgo1 d2g17a1 d1cf2o1 d2czca2 d1r0ka2 d1obfo1 d2cvoa1 d1ebfa1  
d1h6da1 d1i32a1 d1zh8a1 d2q49a1 d1qkia1 d1j5pa4 d3pzra1 d1xeaa1  
d1vkoa1 d1vm6a3 d3qvsa1 d2pkqo1 d1b7go1 d1gr0a1 d1p1ja1 d1lc0a1  
d3pwka1 d2hjsa1 d1zyao1 d1vkna1 d1tlta1 d1nvmb1 d3sjua\_ d3ojfa1  
d1xu9a1 d2jjya1 d1n7ha\_ d1y1pa1 d1h5qa\_ d1jtva\_ d4fs3a\_ d2bkaa1  
d1gy8a\_ d2c5aa1 d1ulsa\_ d1ooea\_ d2b69a1 d1y5ma1 d1spxa\_ d1lae1a\_  
d1bxka\_ d1ydea1 d1gega\_ d1hdoa\_ d1o5ia\_ d1e6ua\_ d1snya1 d2rhca\_  
d3zv4a\_ d5ceja\_ d2d1ya1 d1fjha\_ d3w8ea\_ d2fmua1 d1x1ta\_ d1rpna\_  
d3ay7a1 d1k2wa\_ d1eq2a\_ d2hrba1 d3ruaa\_ d2ew8a1 d4hwka\_ d1xgka\_  
d2bd0a1 d1yo6a1 d2a35a1 d2ntva\_ d1vl8a\_ d1hdca\_ d4bkua\_ d2ag5a1  
d2q45a\_ d1nffa\_ d4iy1a\_ d1zbqa1 d1kewa\_ d1lek6a\_ d1ja9a\_ d2q46a2  
d1iy8a\_ d1cyda\_ d2ptga\_ d1hxha\_ d1uzma1 d3lyla\_ d4m89a\_ d3weya\_  
d2blla1 d1w6ua\_ d1sb8a\_ d2q2va\_ d4nr0a\_ d1e6wa\_ d2gasa\_ d3oiga1

d2bgka1 d1mxha\_ d1vl0a1 d1rkxa\_ d1r6da\_ d1wmaa1 d1e7wa\_ d2c07a1  
d1xkqa\_ d3tzha\_ d1g0oa\_ d3lz6a\_ d1qyca\_ d1ledoa\_ d1gz6a\_ d1oc2a\_  
d1t2aa\_ d1zema1 d2xoxa\_ d1z45a2 d1geea\_ d1p33a\_ d3lt0a\_ d4e6pa\_  
d2wyua\_ d1db3a\_ d4q9na\_ d1xhla\_ d4o1ma\_ d1fmca\_ d2uvda\_ d2gdza1  
d1uaya\_ d2z1ma\_ d2o23a2 d2fr1a2 d2fr1a1 d1qsga\_ d1qyda\_ d4zjua\_  
d2a4ka1 d1yb1a\_ d1wvga1 d1yxma1 d3f4ba\_ d1mg5a\_ d1xg5a1 d1cmxa\_  
d1xd3a\_ d3ifwa\_ d1ex0a4 d1g0da4 d2f4ma1 d1x3za\_ d3ioqa\_ d1fh0a\_  
d1o0ea\_ d1khqa\_ d1m6da\_ d2cb5a\_ d1cs8a\_ g8pch.1 d1s4va\_ d2pnsa\_  
d1vsna1 d1mira\_ d1iwda\_ d2oula\_ d7pcka\_ d3bwka\_ d3bcna\_ d2p86a\_  
d1pvja\_ d1pcia\_ d1gece\_ d1deua\_ d4bs6a\_ d1xkga1 d1cqda\_ d2c0ya\_  
d2bdza\_ d3p5ua\_ d2o36a\_ d2jk6a2 d2jk6a1 d1feca1 d1feca2 d1lpfa1  
d1lpfa2 d1xhca1 d1xhca2 d1dxla2 d1dxla1 d1gera2 d1m6ia2 d1onfa1  
d3lada2 d3lada1 d1w4xa1 d1w4xa2 d1gesa2 d1mo9a1 d1xdia1 d1fl2a2  
d1fl2a1 d1fcda1 d1fcda2 d1h6va2 d1h6va1 d1mo9a2 d1gv4a2 d1gv4a1  
d2gv8a2 d2gv8a1 d1aoga1 d1aoga2 d1hyua1 d1ebda1 d1ebda2 d3dk9a1  
d1q1ra2 d1q1ra1 d1gesa1 d1zbf1a1 d2z1ha\_ d2etja1 d3qioa1 d1j11a\_  
d2e41a\_ d1j12a\_ d21sna1 d1io2a\_ d1uaxa\_ d2yv0x\_ d1mu2a1 d1lekea\_  
d1i39a\_ d1o94a2 d1lqta1 d1cjca1 d1pn0a1 d1reoa1 d1ju2a1 d2f5va1  
d3c96a1 d2gmha1 d1pj5a2 d1gpea1 d1o5wa1 d1n4wa1 d2dw4a2 d2ivda1  
d1seza1 d2voua1 d1kdga1 d1s5ja1 d2hbja2 d2igia\_ d1wlja\_ d1qhta1  
d4dlea1 d1tgoa1 d2f96a1 d3tr8a1 d3mxma\_ d1q8ia1 d1y97a1 d1w0ha\_  
d1kfsa1 d2py5a1 d1d5aa1 d1yt3a3 d2guia\_ d3mwp1a1 d4kb1a\_ d2y8ga\_  
d1xkea1 d2y8fa\_ d4qmea2 d2xdta2 d1z5ha2 d1v58a1 d1t3ba1 d4ilfa2  
d4npba2 d3nvva1 d1krha3 d2h88b1 d1n62a2 d1t3qa2 d1kf6b2 d1zoyb1  
d1jq4a\_ d1dgja2 d1rm6c2 d1jmxa2 d1pbya1 d1pbya2 d1r7ha\_ d1faaa\_  
d1wika1 d1xfla\_ d1ttza1 d2f51a1 d1ti3a\_ d1nhoa\_ d1sena\_ d2i4aa\_  
d1ep7a\_ d1zmaa1 d1fo5a\_ d3lefa1 d3diea1 d2yana1 d1z6na1 d1oaza\_  
d3zywa1 d4aj8a\_ d1nm3a1 d4fiwa\_ d1wmja\_ d4hs1a1 d1liloa\_ d1xwaa1  
d1wjka1 d2vm1a\_ d1fb6a\_ d1gh2a\_ d1h75a\_ d1nw2a\_ d1kx5b\_ d3a6na\_  
d4m6ba2 d2nqbd\_ d3wkjd\_ d2yfwe\_ d4h9na\_ d5bnxa\_ d1kx5c\_ d3r45a\_  
d1eqzb\_ d4jjnb\_ d1f66c\_ d1eqza\_ d4wnnb\_ d1kx5a\_ d1u35c1 d1id3a\_  
d2nqbc\_ d1kx5d\_ d1ku5a\_ d1b67a\_ d1tafa\_ d1tafb\_ d1jfib\_ d1q9ca\_  
d1h3ob\_ d2byka1 d1n1ja\_ d4g92b\_ d1bh9a\_ d1jfia\_ d1h3oa\_ d2bykb1  
d1n1jb\_ d1pd212 d1nhya2 d2a2ra2 d1k0dd2 d1f2ea2 d1gsua2 d1f3ba2  
d2fhea2 d2pvqa1 d1tw9a2 d1oyja2 d1k0ma2 d3ik7a1 d4is0a1 d1r5aa2  
d1jlva2 d1m0ua2 d3gtub2 d1z9ha2 d1okta2 d1axda2 d2gsra2 d1tu7a2  
d1k3ya2 d1zagma1 d1b48a2 d1gnwa2 d1gwca2 d2gsta2 d1glqa2 d1oe8a2  
d1pn9a2 d1v2aa2 d1fw1a2 d1duga2 d1gd6a\_ d1f6ra\_ d1livma\_ d2gv0a\_  
d1iiza\_ d2z2fa\_ d1j8xa\_ d1ghla\_ d1b9oa\_ d1741a\_ d1691a\_ d2o4wa\_  
d1p37a\_ d1k28a3 d1xjta1 d1jtma\_ d2f2qa\_ d4e97a1 d2za0a\_ d2c21a1  
d2pjsa1 d1k11a\_ d2i7ra1 d1ecsa\_ d1xqaa1 d5cj3a1 d1npba\_ d1jifa\_  
d2p7oa\_ d1r9ca\_ d1mpya2 d1kw3b2 d1kw3b1 d4ghga1 d1tfza1 d3isqa1  
d3isqa2 d1sqia1 d1sqia2 d1lkda1 d1mpya1 d1cjxa2 d1cjxa1 d1sp9b2  
d1t47a1 d1t47a2 d1f1ua2 d1sp8a1 d1sp8a2 d1f1ua1 d1iyka2 d1iyka1

d1rxta1 d1iica1 d1qsta\_ d2beia1 d4m3sa\_ d1u6ma1 d1ygha\_ d1yk3a1  
d3dr6a\_ d1xmta\_ d1z4ea1 d2ge3a1 d1bo4a\_ d2fiaa1 d2jdca1 d1y9wa1  
d3to7a\_ d1wwza1 d2fl4a1 d2ozua1 d2b5ga\_ d2cy2a1 d2p0wa\_ d1cm0a\_  
d4pswa\_ d1yrea1 d1yr0a1 d1m4ia\_ d2gana1 d1yvka1 d1ghea\_ d2g3aa1  
d1y7ra1 d2euia1 d1q2ya\_ d2fsra1 d1xeba\_ d2ae6a1 d1cjwa\_ d1qsmo\_  
d2aj6a1 d1y9ka1 d1vkca\_ d2atra1 d1n71a\_ d2d4pa1 d2fiwa1 d2fe7a1  
d1tiqa1 d2ou2a\_ d1yx0a1 d2fcka1 d1p0ha\_ d2j8ma\_ d2pq8a\_ d1z4ra1  
d1s3za1 d1ufha\_ d2hqya1 d2hqya2 d1lrza2 d1lrza3 d1ne9a2 d1xvqa1  
d3hy2a\_ d2cvba1 d1o8xa\_ d1lu4a\_ d1we0a1 d2bmx1 d2a4va1 d1psqa\_  
d1xiya1 d1q98a\_ d1n8ja\_ d1zofa1 d2ggta\_ d3tjja\_ d4je1a1 d1o73a\_  
d3s9fa\_ d2zcta\_ d1qmva\_ d1jfua\_ d2b1ka\_ d5dvba1 d2b5xa1 d2v2ga\_  
d1st9a\_ d3tb2a\_ d4llra\_ d4fh8a1 d1e2ya\_ d1knga\_ d2h30a\_ d1i5ga\_  
d2z9sa\_ d2f8aa1 d1tp9a1 d2b7ka\_ d1nm3a2 d3hvva\_ d2wfca1 d4kcea\_  
d1xvwa1 d4gqca1 d3qpma\_ d4k1fa\_ d1zzoa1 d1gp1a\_ d1prxa\_ d2qked\_  
d4ksoa\_ d1t4za1 d1wwja\_ d2m5ta\_ d1cqqa\_ d1wqsa\_ d5bpea\_ d2ipha\_  
d1lvoa\_ d2bhga1 d3tnta\_ d3sjia\_ d3d23a1 d2fyqa\_ d3tloa\_ d3zvea1  
d2hrva\_ d3q3ya1 d4asha1 d1etha2 d1w52x1 d2ppla1 d1lpbb2 d2oxea1  
d1bu8a2 d1rpla2 d1ysl1x\_ d4hs9a\_ d1ispa\_ d1ku0a\_ d3qmma\_ d1bnla\_  
d1ra6a\_ d3gsza\_ d1khva\_ d1te9a\_ d2xwha\_ d3uqsa\_ d3hkwa\_ d3n6ma\_  
d2cjqa\_ d2xyma\_ d1teba\_ d1te8a\_ d1s48a\_ d1u09a1 d4wfxa\_ d3tyqa\_  
d2pgga1 d1lgya\_ d4l3wa\_ d1llfa\_ d1gz7a\_ d1lukca\_ d2ftba\_ d1pmpa\_  
d2rcqa1 d1fdqa\_ d4l1ka\_ d1sa8a\_ d1vyfa\_ d1lpja\_ d3vg7a1 d4azqa1  
d5bvqa\_ d1p6pa\_ d2qo4a\_ d1opba\_ d1yiva1 d1o1va\_ d4bvma1 d4tkba\_  
d4i3ba\_ d1bwya\_ d1ftpa\_ d1ggla\_ d4gkca\_ d1cbia\_ d3p6da1 d1kqwa\_  
d2a0aa1 d2ddfa\_ d3zxha\_ d1cgla\_ d1rm8a\_ d1leaka2 d1hy7a\_ d2jsda\_  
d1cxva\_ d1hv5a\_ d1i76a\_ d1g12a\_ d3p0ya1 d1lgra1 d1lgra2 d1n8yc2  
d1n8yc1 d1m6ba2 d4dv8a2 d1j7na1 d1h32a1 d1cixa\_ d1y29a\_ d1v7fa\_  
d2jtba\_ d1d1ha\_ d1g9pa\_ d1llupa\_ d1qk7a\_ d1mb6a\_ d2a2va\_ d1niya\_  
d1i25a\_ d2mpqa\_ d1ie6a\_ d1kqha\_ d1la4a\_ d2mxoa1 d1d10a\_ d1koza\_  
d1qk6a\_ d1emxa\_ d1lqra\_ d1c6wa\_ d1rmka\_ d1ixta\_ d1eyoa\_ d1cnna\_  
d1fu3a\_ d1g1pa\_ d1f3ka\_ d1fyga\_ d1rypd\_ d1lrua\_ d1rypc\_ d3unfk\_  
d1rypa\_ d1j2pa\_ d1lru1\_ d1j2qh\_ d3unfh\_ d1m4ya\_ d1rypb\_ d1lru1\_  
d1lirug\_ d1lru2\_ d1q5rh\_ d1rypg\_ d1liruf\_ d1q5qa\_ d1e94a\_ d1lirub\_  
d1ryph\_ d3ty6a\_ d1lruj\_ d1lruk\_ d1rype\_ d1lirud\_ d1lirue\_ d3mi01\_  
d1rypf\_ d1lruh\_ d2z3ba\_ d1lruc\_ d3mka2\_ d1lru1\_ d1ny721 d1a6ca3  
d1a6ca2 d1a6ca1 d1pgl22 d1pgl21 d1pgl11 d1ny711 d1mqta\_ d1d4m3\_  
d1fmd3\_ d2mev1\_ g1aym.1 d1ev13\_ d4q4w1\_ d1r1a3\_ d2x5ia\_ d1rhi1\_  
g1r1a.1 g1d4m.1 g1rhi.1 d1b35b\_ d1loopa\_ d1tme1\_ d4iv1a\_ g1pvc.1  
g1fpn.1 d1fpn1\_ d4gb31\_ d1d4m1\_ d1fmd1\_ d2wzr3\_ g1cov.1 d1qqp3\_  
g1fmd.1 d2x5ic\_ d1rhi3\_ g1oop.1 d1hxs1\_ g1hxs.1 d1fpn3\_ d1bev1\_  
g2mev.1 d1eah3\_ d1aym1\_ d1pvc3\_ d1qqp1\_ d1zba3\_ d1h8ta\_ d3vbhc\_  
g1b35.1 g1bev.1 d1hxs3\_ g1ev1.1 d1bev3\_ g1tmf.1 d1tmf1\_ d1b35a\_  
d2mev3\_ g1eah.1 g1h8t.1 d1eah1\_ d4q4w3\_ d1r1a1\_ d1aym3\_ d1pvc1\_  
d1zba1\_ d1h8tc\_ d1loopc\_ d1tme3\_ g1qqp.1 d4iv1c\_ g1tme.1 d3ubub\_

d1legia\_ d1qo3c\_ d1v7pa\_ d1tdqb\_ d3ubua\_ d1c3ab\_ d1h8ua\_ d3bx4b\_  
d1t8ca1 d1sb2a1 d1qdda\_ d2ziba1 d3cada\_ d1byfa\_ d1j34b\_ d1jzna\_  
d1c3aa\_ d1oz7b\_ d1wmza\_ d3bdwb\_ d1hq8a\_ d1fifa1 d1dv8a\_ d3hupa\_  
d1wk1a1 d1umra\_ d2afpa\_ d3bx4a\_ d1gz2a\_ d1sl6a\_ d1v7pb\_ d3g8ka\_  
d1ixxa\_ d1j34a\_ d1jwib\_ d1g1sa1 d1y17a1 d1ja3a\_ d1fvub\_ d3bdwa\_  
d1sb2b1 d1fvua\_ d1umrc\_ d1oz7a\_ d4m17a\_ d3cfwa1 d1ypqa1 d1g1ta1  
d3fd4a\_ d3l9jc\_ d4dn8a1 d1v41b\_ d1rd11\_ d2msba\_ d4w9ta\_ d1jvna1  
d4x2ra1 d1ka9f\_ d1qo2a\_ d4axka1 d1h5ya\_ d4u28a\_ d2y88a\_ d4wd0a\_  
d1vzwa1 d1eixa\_ d3exra\_ d2ffca1 d2fdsa1 d3n3ma1 d2czda\_ d1q6oa\_  
d2yyua\_ d1vqta1 d1dbta\_ d3ldva1 d2flia1 d1rpxa\_ d1tqja\_ d1tqxa\_  
d1prt2\_ d2r80b\_ d1cqxa1 d1cg5a\_ d1gcvb\_ d3boma\_ d2h8fb\_ d2raoa\_  
d3bj1a\_ d4hrrb\_ d2r50a\_ d3d1kb\_ d2aa1b1 d3zhwa\_ d3hf4b\_ d3gdja\_  
d1jebb\_ d3bj1b\_ d1x9fb\_ d1wmub\_ d1gcva\_ d3bcqb\_ d3d4xb\_ d1gvha1  
d2dc3a\_ d3hf4a\_ d4yu3a\_ d3k8ba\_ d1qpwb\_ d2r80a\_ d3bcqa\_ d1v4wa\_  
d3wtgb\_ d1j17a\_ d4esaa\_ d1a9we\_ d3d1ab\_ d1fsla\_ d4h21a\_ d1v4wb\_  
d1mwca\_ d1vhba\_ d1jeba\_ d1spgb\_ d1h97a\_ d1q1fa\_ d1tu9a1 d3d1aa\_  
d1hdsb\_ d3hyub\_ d2zfb\_ d3fs4a\_ d1oj6a\_ d1shrb\_ d4h21b\_ d4yu3b\_  
d1spga\_ d3hrwa\_ d3qqra\_ d3at5a\_ d4wchd\_ d3hyua\_ d1cg5b\_ d1uc3a\_  
d1hbra\_ d2raob\_ d1outb\_ d4esab\_ d3gdjb\_ d3qqqa\_ d1x9fc\_ d3vrfa\_  
d1litha\_ d3mkba\_ d3d4xa\_ d3mjpa\_ d1j16a\_ d3fh9a\_ d1louta\_ d2dc3b\_  
d1lit2a\_ d3eoka\_ d3g46a\_ d1qpwa\_ d3vrfb\_ d1ch4a\_ d1x9fd\_ d1hdsa\_  
d2zfba\_ d3mkbb\_ d1or4a\_ d3wtga\_ d1a4fa\_ d3fh9b\_ d3bomb\_ d3cy5a\_  
d3at5b\_ d1x9fa\_ d2oifa\_ d4lmxb\_ d3v57a\_ d1kn1a\_ d1cpc\_ d4f0ta\_  
d2vjha\_ d4po5b\_ d1eyxa\_ d1alla\_ d4f0tb\_ d1b33b\_ d1b8db\_ d4h0mb\_  
d1b33a\_ d2vjhb\_ d4lm6b\_ d2vmlb\_ d1a11b\_ d2vjta\_ d3dbja\_ d2vmla\_  
d2vjtb\_ d4f0ub\_ d1f99b\_ d4rmpa1 d1liaa\_ d1eyxb\_ d2uulb\_ d4lmsb\_  
d4f0ua\_ d2bv8a\_ d1f99a\_ d2bv8b\_ d2c71b\_ d3dbjb\_ d4rmpb1 d1b8da\_  
d4h0ma\_ d3v57b\_ d1kn1b\_ d1liab\_ d2uula\_ d2j96a\_ d1pjqa1 d3ia2a\_  
d4dgqa1 d1hkha\_ d1zoia\_ d1azwa\_ d2xqfa\_ d1ea5a\_ d1f6wa\_ d1dx4a\_  
d1qe3a\_ d1k4ya\_ d4qwwa\_ d2ha2a\_ d1jmx4 d1pbya3 d1pbya4 d1b9ra\_  
d1offa\_ d1frra\_ d3wcqa\_ d1e9ma\_ d1l15pa\_ d1wria\_ d1i7ha\_ d3av8a\_  
d1rfka\_ d3p1ma1 d3b2ga\_ d2bt6a2 d1s5ja2 d1qhta2 d4dlea2 d1tgoa2  
d3py8a2 d1q8ia2 d1kfsa2 d2py5a2 d1d5aa2 d1f74a\_ d3l21a\_ d2e1da\_  
d1to3a1 d1w3ia\_ d1sfla\_ d1n7ka\_ d1vcva1 d4imea\_ d1wa3a\_ d2ocza1  
d1f2ja\_ d3m16a\_ d2yxga\_ d1ub3a\_ d3a5fa\_ d1fbaa\_ d1l16wa\_ d1xfba1  
d1wx0a1 d1vpxa1 d1mxsa\_ d2a4aa1 d1xkya1 d3cq0a1 d3s1xa\_ d1f05a\_  
d1fdja\_ d3cpa1 d4d2ja\_ d1cg2a1 d1yloa2 d1y7ea2 d1y0ya3 d1l1fwa1  
d1vixa1 d1fnoa4 d1vhoa2 d1ysja1 d1vhea2 d1z21a1 d2fvga2 d1r3na1  
d2grea2 d1xmba1 g1q71.1 d1rtqa\_ d3rp2a\_ g1ucy.1 d1fuja\_ d2zchp\_  
d3w94a\_ d1si5h\_ d1lo6a\_ g2pka.1 d1cgha\_ d1kigh\_ d1a5ia\_ d3s9ba\_  
d1hj8a\_ d1ao5a\_ d2anya\_ d1q3xa1 d1gvza\_ d4gsoa\_ d2f91a1 d1iaua\_  
d1gdna\_ d1eufa\_ g1fiw.1 d1eq9a\_ d4nfea\_ d2rdla\_ d1spja\_ d1elva1  
d1a7sa\_ d1ekbb\_ d1pfxc\_ d1yc0a\_ d2aiqa\_ g1fiz.1 d1fi8a\_ d4k60a\_  
d4dgja\_ d1mzaa\_ d1op0a\_ d3tjva\_ d1pytd\_ d1sgfg\_ g1gg6.1 d2eeka\_

g1rtf.1 d1a0ja\_ d3g01a\_ d1pytc\_ d4e7na\_ d1ddja\_ d1z8ga1 d2hlca\_  
d1npma\_ d1brup\_ g1jou.1 d1sgfa\_ d1autc\_ g2hnt.1 g1kdq.1 dlorfa\_  
d3s69a\_ d4crga\_ d1fxya\_ d1bqya\_ d1svpa\_ d1mbma\_ d3su6a1 d1cula1  
d4agka\_ d1vcpa\_ d1q31a\_ g1n11.1 d3e90b\_ d1ep5a\_ d3u1jb\_ d1dzka\_  
d4tlja\_ d2a2ua\_ d4wfva\_ d3t1da\_ d4iaxa\_ d3zq3a\_ d2nnda\_ d1i4ua\_  
d1kxoa\_ d1bbpa\_ d1kt7a\_ d1exsa\_ d3s26a1 d11f7a\_ d1qfta\_ d4gh7a\_  
d1z24a1 d1qabe\_ d1xkia\_ d3bx7a\_ d4iawa1 d1n0sa\_ d1gkab\_ d3kzaa\_  
d2k23a\_ d219ca1 d2joza1 d1gm6a\_ d3kffa\_ d3saoa1 d1e5pa\_ d1yupa1  
d1iiua\_ d3lgia\_ d3i77a\_ d2z9ia2 d4nsva\_ d1lcya2 d4jcna\_ d1agja\_  
d1os8a\_ d1hpga\_ d1p3ca\_ d111ja\_ d1qtfa\_ d1e69a\_ d1mv5a\_ d3g60a4  
g1ii8.1 d1ewqa2 d1ji0a\_ d1qhla\_ d1v43a3 d2wmfa1 d1vpla\_ d1g2912  
d4a82a2 g1f2t.1 d2d62a1 d3tuic1 d2bbsa1 d3g60a3 d2ixea\_ d1g6ha\_  
d1sgwa1 d2qi9c\_ d3rlfa1 d3b60a1 d3d31a2 d2pzea1 g1xew.1 d1jj7a\_  
d1oxxk2 d2onka1 d1wlwa\_ d1iwea\_ d1qf5a\_ d1vmaa2 d1nija1 d1np6a\_  
d2p67a1 d3ihla\_ d1okkd2 d11s1a2 d1s1ma2 d1iona\_ d2v40a\_ d1dj3a\_  
d3hida\_ d2vola1 d2g0ta1 d1vcoa2 d1j8mf2 d1g3qa\_ d1xjca\_ d1qzxa3  
d1ihua2 d1ihua1 d2qm8a\_ d1dj2a\_ d4ioja\_ d1cp2a\_ d1yrba2 d1hyqa\_  
d3gqba2 d1skye3 d1xp8a1 d1tf7a2 d1tf7a1 d1ye8a1 d1skyb3 d2qe7d2  
d4blta\_ d4huta\_ d31daa2 d4hyya\_ d2i3ba1 d1crla\_ d3j9tb2 d3ntua2  
d1vdza1 d2z43a\_ d1e9ra\_ d1nlfa\_ d3ziaa2 d1n0wa\_ d1g6oa\_ d3ziad2  
d3j9ta2 d1pzna2 d3gqbb2 d2i49a\_ d1nnfa\_ d1xvxa\_ d1ursa\_ d1h3da1  
d1iuda\_ d4m1va1 d1twya\_ d3e13x\_ d2nxoa1 d4pfua\_ d3ttma\_ d1elja\_  
d2qmw1 d1us5a\_ d1y3na1 d1jeta\_ d1uqwa\_ d4f19a1 d2esna2 d3thia\_  
d3fasa1 d2uyeb\_ d2xwva1 d1r9la\_ d2fyia1 d1pb7a\_ d2ozza1 d1sw5a\_  
d1nh8a1 d1vr5a1 d2g29a\_ d1xs5a\_ d3lswa\_ d2z23a\_ d3w9va\_ d3tcha\_  
d1q35a\_ d1z7me1 d3q27a\_ d1p99a\_ d1ve4a1 d2i6ea1 d4mcoa1 d4n8ya\_  
d1eu8a\_ d1zbma1 d1hsla\_ d1ixca2 d1j1na\_ d1xvya\_ d1y9ua\_ d2z22a1  
d1xoca1 d4oera\_ d1wdna\_ d5f1qa1 d1xt8a1 d1i6aa\_ d4gwoa\_ d4igta1  
d1pc3a\_ d4mmpa1 d1o63a\_ d2cz1a1 d2onsa2 d4mija1 d1c4oa1 d2p6ra3  
d2p6ra4 d1oywa3 d1wrba1 d1w36b2 d1w36b1 d1c4oa2 d3bora\_ d1t6na\_  
d2eyqa5 d2eyqa3 d2eyqa2 d2zu6a2 d1veca\_ d1uaaa1 d1w36d1 d2g9na1  
d1z3ix2 d2rb4a\_ d1hv8a1 d1hv8a2 d1t5ia\_ d1w36c2 d2j0sa2 d2j0sa1  
d1fuka\_ d3hjha1 d1z5za1 d1qdea\_ d1z63a1 d1s2ma2 d1s2ma1 d1wp9a1  
d1wp9a2 d1gm5a3 d1gm5a4 d3dina4 d3dina3 d1q0ua\_ d1w36c1 d1z3ix1  
d1nkta3 d1nkta4 d1uaaa2 d1w36d2 g1qhh.1 d2fwra2 d2fwra1 d3q3ma\_  
d1za0a1 d1mxra\_ d2inca\_ d1jk0a\_ d2incb\_ d1mhyb\_ d3hf1b\_ d1mtyb\_  
d1r2fa\_ d2uw1a\_ d1mhyd\_ d3n37a\_ d1afra\_ d1oquc\_ d1syya\_ d1mtyd\_  
d2o1za\_ d1uzra\_ d1smsa\_ d2fkza\_ d1zuja1 d1s3qa1 d2fjca1 d1z6om1  
d1veia\_ d4dyya\_ d1jiga\_ d3gvya\_ d2pyba\_ d4cy9a1 d3bvfa1 d1r03a\_  
d2cf7a\_ d1nf4a\_ d1zs3a1 d4iwka\_ d3ka8a\_ d3np0x\_ d1n1qa\_ d11b3a\_  
d4e6ka\_ d1z6oa1 d2fzfa1 d4dyua\_ d3ge4a\_ d1jgca\_ d4am4a\_ d2z6ma\_  
d1ji5a\_ d1vlga\_ d11koa1 d3qz3a\_ d1o9ra\_ d2ffxj\_ d1euma\_ d1yv1a1  
d2v2pa\_ d1j30a\_ d4di0a\_ d1dpsa\_ d2cbia2 d1gqia1 d2choa2 d1oewa\_  
d2qzxa\_ d2asia\_ d1psoe\_ d1miqa\_ d1smra\_ d2h6ta\_ d1pfza\_ d1izda\_

d3hd8a\_ d1j71a\_ d1dpja\_ d4aa9a\_ d1t6ex\_ g1b5f.1 g1lya.1 g1htr.1  
d1qdma2 d1bxoa\_ d1wkra\_ d1tzsa\_ d1libqa\_ d2qzwa\_ d1bdqa\_ d3ggta\_  
d3ixoa\_ d1mrxa\_ d2haha\_ d1tw7a\_ d4njsa\_ d1sgua\_ d2p3da\_ d1nsoa\_  
d3d3ta\_ d2rkfa\_ d1c6ya\_ d2rspa\_ d3ogpa\_ d3ekwa\_ d2o4na\_ d2j9ja\_  
d1baia\_ d3ggua\_ d3lzua\_ d4npua\_ d4j55a\_ d2r8na\_ d2fxda\_ d2p3ca\_  
d4dqea\_ d3ttpa\_ d3t3ca\_ d2p3aa\_ d2hc0a\_ d2fdda\_ d3mwsa\_ d1k8rb\_  
d1wgra1 d1ef5a\_ d1wfy1 d1e8ya3 d1wgya1 d1l1fda\_ d2cs4a1 d1wxma1  
d2byea1 d3kh0a1 d2byfa1 d1wxaa1 d1e7ua3 d1h4ra3 d4yl8a1 d2a16a3  
d1wgda1 d1wgg1 d4q5eb\_ d1wjna1 d1se9a\_ d3n3kb\_ d1wz0a1 d1we6a1  
d2m0xa\_ d2gbka\_ d3rt3b1 d1wh3a1 d1sifa\_ d2ekec2 d4ii2b1 d4hk2a1  
d1c3ta\_ d1m94a\_ d1wgha1 d1ttna1 d1j8ca\_ d1wx8a1 d3v6cb1 d2ma9b\_  
d4i6lb1 d1bt0a\_ d2jvca1 d2k1fa\_ d1wxva1 d1wf9a1 d1t0ya\_ d2io0b2  
d1x1ma1 d2gbma\_ d1zw7a1 d2m17a\_ d1ud7a\_ d1we7a1 d2lwpa\_ d2gbja\_  
d1wjua1 d1v6ea1 d1v86a1 d4eewa\_ d1wiaa1 d4icva\_ d4gu2a\_ d1wx7a1  
d1wy8a1 d4hjka1 d2faza1 d1v5oa1 d2a13a1 d2cr5a1 d1wj4a1 d1s3sg\_  
d1epwa1 d1g66a\_ d5ajha1 d1wioa4 d1ccza2 d1vcaa1 d1dr9a2 d2d9qb1  
d2nxyb2 d1um8a\_ d1qvra2 d1qvra3 d1qzma\_ d1sxjc2 d1jr3d2 d2p65a\_  
d1l8qa2 d1g8pa\_ d3hu3a3 d1sxjd2 d1njfa\_ d1in4a2 d1sxja2 d1tuea1  
d2ce7a2 d1w5sa2 d1sxjb2 d1d2na\_ d1ny5a2 d1ofha\_ d2gnoa2 d2a5yb3  
d1fnaa2 d1u0ja1 d1l1v7a\_ d1iqpa2 d2fnaa2 d1ixsb2 d4gita\_ d1sxje2  
d1g41a\_ d2e3fa\_ d2e3ea\_ d2l1lda\_ d2ny8x\_ d2e3ga\_ d2ny9x\_ d2nz3a\_  
d2l1j7a\_ d1n4na\_ d2m8bb1 d2kyqa\_ d3psma\_ d1jkza\_ d1jxca\_ d2g11a\_  
d4uj0a\_ d2k4ua\_ d1hp2a\_ d2lu9a\_ d1baha\_ d2meoa1 d1wm7a\_ d1hlya\_  
d1n8ma\_ d1jlza\_ d1wpda\_ d1c55a\_ d1pvza\_ d1wt7a\_ d1rjia\_ d1wz5a\_  
d1pjva\_ d1c49a\_ d1qkya\_ d2ktca1 d1wmta\_ d1du9a\_ d1j5ja\_ d1rlga\_  
d1t0za\_ d2i61a\_ d1t1ta\_ d1sn4a\_ d1kv0a\_ d2l1kba\_ d1npia\_ d1wwna\_  
d1pe4a\_ d2kbka\_ d2li7a\_ d1djta\_ d2kbha\_ d1dq7a\_ d1sega\_ d1zywa1  
d1jzaa\_ d1n9wa1 d1bbua1 d1e1oa1 d1c0aa1 d1l0wa1 d3a74a1 d1eova1  
d1iyjb4 d1iyjb5 d1iyjb3 d1o7ia\_ d4ipca1 d1x3ea\_ d4apva\_ d1jb7a1  
d1jb7a2 d1jb7a3 d3kdfa\_ d1ue1b\_ d1wjja1 d3eiva\_ d1xjva2 d1xjva1  
d2ccza2 d1se8a\_ d1l1loc\_ d1jb7b\_ d1qvca\_ d3ulla\_ d1qzga\_ d1miau4  
d1miau5 d1miau3 d3g48a1 d1gd7a\_ d1mkha\_ d1jjcb3 d1y14b1 d2nn6i1  
d1i94l\_ d2zjra2 d1smxa\_ d2qamc2 d1hh2p1 d2r7da1 d1rl2a2 d1wfga1  
d3bzka4 d1x6oa2 d3a0ja\_ d2j01d2 d2ja9a1 d4q15a\_ d1hr0w\_ d1luza\_  
d2n3sa\_ d2vnud1 d1h95a\_ d1go3e1 d2nn6h1 d1ne3a\_ d2mola\_ d1liz6a2  
d1jjga\_ d1e3pa2 d2ix0a3 d2ix0a2 d2lxja\_ d1ueba3 d1ueba2 d2z0sa1  
d1u0la1 d2ix0a1 d2eifa2 d2je6i1 d3i2za1 d2c35b1 d2ahob2 d1t9ha1  
d3i4oa\_ d2qall1 d1jt8a\_ d2nn6g1 d1g6pa\_ d3cama\_ d1i94q\_ d1c9oa\_  
d1d7qa\_ d2ba0a1 d2vnud2 d2vnud3 d1khia2 d2qalq1 d1wi5a1 d1xta2  
d1ny4a\_ d1fvia1 d1ckma1 d1p16a1 d1x9na2 d2a1ka\_ d1je5a\_ d1rpma\_  
d2shpa1 d1yfoa\_ d1l18ka\_ d2ooqa1 d1g4us2 d1p15a\_ d1lara2 d1lara1  
d1wcha\_ d2fh7a2 d2fh7a1 d1ohea1 d1ohea2 d2f4da\_ d1rxda\_ d2hxpa\_  
d1xria\_ d1d5ra2 d1fpza\_ d3ezza\_ d4y2ea\_ d1i9sa\_ d3azya\_ d3wvja\_  
d1upsa1 d1ajoa\_ d2hyka\_ d1ajka\_ d2vy0a\_ d1o4ya\_ d3o5sa\_ d3d6ea\_

d3atga\_ d1dypa\_ d1lumza\_ d3i4ia\_ d1c1la\_ d41bqa\_ d1a78a\_ d1slta\_  
d4no4a\_ d3zsja\_ d3duia\_ d1g86a\_ d1is3a\_ d1qmja\_ d1hlca\_ d1tdha3  
d1q3ba3 d1k82a3 g1qmo.1 g1len.1 d3zyra\_ d1fnja\_ d1n47a\_ g21tn.1  
d1avba\_ d3usua\_ d1dhkb\_ d1f9ka\_ d1lukga\_ d1g8wa\_ d1g9fa\_ d1wbfa\_  
d3wcsa\_ d1g7ya\_ g1loe.1 d1mvqa\_ d1hq1a\_ d1v6ia\_ d1dbna\_ d1qnwa\_  
d1fx5a\_ d418qa\_ d1ioaa\_ d3n35a\_ d3ubra\_ d1qo8a1 d1d4ca1 d2k3va\_  
d1ft5a\_ d1qdba\_ d1m1qa\_ d2j7aa\_ d1h21a\_ d1ogyb\_ d4fasa\_ d1jnia\_  
d1oaha\_ d1sp3a\_ d3h33a\_ d1rwja\_ d19hca\_ d1os6a\_ d3bxua\_ d3h4na\_  
d1i77a\_ d3caoa\_ d1j0pa\_ d2ctha\_ d1duwa\_ d1ofwa\_ d2e84a\_ d1hh5a\_  
d1gyoa\_ d3h34a\_ d1dszb\_ d1a6ya\_ d3cbbba\_ d1ynwa1 d1r4ia\_ d2hana\_  
d2hanb\_ d2enval d1kb4b\_ d2n11b\_ d1lola\_ d1cita\_ d2dara2 d2dara1  
d1wyha2 d2dloa2 d1rutx4 d1rutx3 d2cuqa2 d1x41a2 d1x41a1 d1x3ha2  
d1x3ha1 d2d8za1 d1x61a2 d1x6aa1 d1x6aa2 d2cora2 d2cora1 d1v6ga1  
d1v6ga2 d2d8za2 d1x64a1 d1x64a2 d1b8ta1 d2co8a1 d1x63a2 d2dj7a2  
d2dj7a1 d2cu8a2 d2cu8a1 d1g47a2 d1g47a1 d1j2oa1 d1wyha1 d2dloa1  
d1wiga1 d1wiga2 d2cupa2 d2cupa3 d1x68a1 d2d8ya2 d2d8ya1 d1m3va2  
d1x62a1 d1x68a2 d1x61a1 d1b8ta3 d1b8ta2 d2d8xa2 d2d8xa1 d1x4ka1  
d1x4ka2 d2cuqa1 d1m3va1 d2co8a2 d1j2oa2 d1x63a1 d2cura1 d2cura2  
d1x62a2 d1op9a\_ d1y01a1 d1etzb1 d1egj11 d2gsib1 d1nj9a1 d4jfhd1  
d1aqk11 d1t2ja\_ d1l04h1 d1zvya1 d3v4v11 d4enec1 d1kxtb\_ d5e8ea1  
d2pxya\_ d4weud\_ d1xiwc\_ d2esvd1 d1qznh\_ d1logae1 d1f4xh1 d4n1hb\_  
d3ezjb1 d3mlw11 d1kfah1 d1etza1 d1b4jh1 d3cfic\_ d4w68a\_ d2arja1  
d1ek3a\_ d2ok011 d1vera\_ d1uwgh1 d1blnb1 d1fpth1 d1rzga1 d2giya1  
d4m3kb1 d1nc2a1 d2nyyd1 d1ncna\_ d1fbih1 d5dxwa\_ d4fqqa1 d1dqdh1  
d1jfq11 d1kelh1 d1faih1 d1frgl1 d1figl1 d4m6n11 d1fo0a\_ d4hxb11  
d3b5ga\_ d3quyd1 d2h9gb1 d1i8kb\_ d2dd8h1 d2ck0h1 d1eaja\_ d4w6wb1  
d2a6ib3 d1t66d1 d2e27h\_ d1ob1b1 d1f11b1 d2v7na1 d1ad0a1 d2xt1b1  
d1pskh1 d4i13b1 d2op411 d1a0q11 d1uwel1 d1za3a1 d1ncb11 d4uu9a\_  
d1bm3h1 d1cloh1 d1nqba2 d1cf8h1 d4y5va\_ d1mhph1 d5anma1 d4cdgc1  
d4ldeb\_ d1y01b1 d2pcpb1 d1z3g11 d1dfb11 d1fh5h1 d3g5xa1 d1tzib1  
d4dn311 d3zhka1 d2b1hh1 d2uyla1 d1f3dh1 d1nj9b1 d2agjh1 d2h1pl1  
d1q72h1 d8fabb1 d1ndmb1 d1rjca1 d4u6hb1 d3upca\_ d2fbj11 d1osph1  
d1tvda\_ d2cjev\_ d4fhbd1 d1bd2d1 d1rz7h1 d3nn8a\_ d1knoa1 d1nfd1  
d2bmkb1 d1dq11\_ d1igyb1 d1igf11 d12e8h1 d3utza1 d1nc2b1 d1rihh1  
d4mwfb1 d4jvpa1 d1mieh1 d1rhfa1 d1fgn11 d1sbsh1 d1lp9e1 d1dn0a1  
d41qf11 d1iaih1 d1kgcd1 d1mh5b1 d1gpol1 d2g60h3 d1f8t11 d2jixd1  
d4grwh\_ d1fo0b\_ d1bfob1 d1axsa1 d1u9ka\_ d1nmbh\_ d1h8na1 d1h8na2  
d1jguh1 d4eura1 d3sdy11 d35c8h1 d1w7211 d1mvub\_ d1i9rh1 d1ob1a1  
d4wenb\_ d1yeeh1 d3ietc1 d1f58h1 d1ad0b1 d1mqk1\_ d1nbvh1 d4b50a\_  
d3r8bb\_ d1baf11 d1mamh1 d4rgne1 d2gsgb\_ d35c811 d1bafh1 d1ai1h1  
d2pcpa1 d2fath1 d2x1pa\_ d1orsb1 d1ibgl1 d1shma\_ d1a2yb\_ d1u0qa\_  
d2coqa\_ d1hilb1 d1qfwi\_ d1jv5b\_ d1fn4b1 d5e0qa\_ d1nsnh1 d1plgl1  
d4ocx11 d1kb5h1 d1rzfh1 d1pg7x1 d2fx7h1 d2oi9c\_ d1l7i11 d3eyva1  
d1d5i11 d4ffyl\_ d1tet11 d1a6wh\_ d1lac6a\_ d3dvfa\_ d1nfd1 d1mimh1



d1ri8a1 d1jhlh\_ d3dura\_ d1fskb1 d1f97a1 d3so3b1 d2ak4d1 d1lp9f1  
d4z7wf1 d1l7th1 d4y5ya\_ d4x7ec1 d1emth1 d1ikfl1 d1nlbh1 d4utal1  
d1bjma1 d1eapb1 d1u6ah1 d2dtgd1 d1kj2b\_ d1xeda1 d1cleh1 d1fgvh\_  
d2bnub1 d2fb4h1 d2dtgb1 d1ktrh\_ d1jpth1 d1qkz11 d4hepg\_ d2atpb1  
d1flrh1 d2hrpl1 d1mvfa\_ d1iaim1 d3k80a1 d2jb5h1 d3zkxc\_ d4grwe\_  
d1it9h1 d1rhhb1 d3w9ec\_ d1e4wh1 d1sy6h1 d2j6eh1 d3qxta\_ d1jglh1  
d1p7ka1 d1tzhb1 d4n8pa1 d1gaf11 d2jelh1 d1wioa2 d4i0cc1 d1cicb1  
d1lmka2 d1lmka1 d1iqwh1 d1orqb1 d1ejoh1 d1jnlh1 d4zg1a\_ d43c9b\_  
d1ggbl1 d1wejh1 d3q6fa1 d1f3dj1 d3c6la1 d1bqlh1 d3p9wb\_ d1a3r11  
d1h0db1 d2uzil\_ d1eo811 d1qfwl\_ d1n7m11 d1igja1 d1c5ch1 d2a9mh\_  
d1rmfh1 d1fj1b1 d4heme\_ d1ccza1 d1a5fh1 d1ogad1 d1dlfh\_ d1qa9b\_  
d1vgel1 d3qskb\_ d1sjxa\_ d4ozfg1 d1sq2n\_ d1qd0a\_ d1kcvh1 d1c5db1  
d3qcull d8faba1 d3bn9d1 d1mjuh1 d4y8dc\_ d7fabh1 d3dvgb1 d1lo011  
d1a6tb1 d1gigh1 d1kcrh1 d2hwz11 d1yjd1 d3clfl1 d4krna\_ d1d171\_  
d1e6o11 d1mexh1 d3r0ma\_ d4kkna\_ d1fns11 d1oaqh\_ d1rza1 d1ucbh1  
d1ncw11 d4b41a\_ d1nfd1 d2mpah1 d2d7t11 d4grwf\_ d4b5ea\_ d1lk3h1  
d3u79a\_ d4u3xa\_ d1ghf11 d1bvkb\_ d1mcww1 d1b88a\_ d1jrhh1 d32c2b1  
d4wemb\_ d1dsfh\_ d1op3h1 d1ce111 d1iqda1 d1qoka1 d1qoka2 d1qfuh1  
d2crya1 d1ay1h1 d1oaql\_ d3ab0b\_ d1rur11 d1t4kb1 d1bz7b1 d1n0xh1  
d1for11 d1ucb11 d4w6yb\_ d43c9a\_ d2aab11 d1tzia1 d4n1ca\_ d1k6qh1  
d3g9ab\_ d4tvsa1 d1ligmh\_ d1pz5b1 d3dx9a1 d3wxwh\_ d1nakh1 d1kcull  
d3eaka\_ d4qlra1 d1cr911 d1d9ka\_ d1f4x11 d1deea1 d2i27n2 d1c12a1  
d2orb11 d1j8hd1 d1mcp1 d1c5da1 d1kenh1 d1bd2e1 d1h5ba\_ d4x7fc1  
d3upaa\_ d1t3fa1 d1indh1 d2dtgc1 d4hc111 d1zv5a1 d4wgvb\_ d1uwgl1  
d4f37k1 d1aqkh1 d1vesa\_ d3zkqd\_ d1fpt11 d1lo411 d1knob1 d3rrqa\_  
d1ct8b1 d4orz\_ d1mlbb1 d4hgkc1 d1dqdl1 d1bogb1 d4ozhe1 d1dr9a1  
d1i7za1 d1dn0b1 d1kell1 d1rzib1 d1ypzf1 d1wtla\_ d1hkfa\_ d1fail1  
d1figh1 d2vyre\_ d1sjva\_ d1ohqa\_ d1bfoa1 d1pkqb1 d1mjul1 d1b4j11  
d1nsn11 d2arjb1 d1p4bh\_ d4aj0a\_ d3nn8b\_ d2rcja1 d1f2xk\_ d4v1dd\_  
d1adqh1 d2eksa\_ d4k3ga\_ d1jfqh1 d1uweh1 d1frgh1 d4gftb\_ d1uz8b1  
d4n1ea\_ d1bm311 d1clol1 d3mcka1 d2vq1a1 d1ae6h1 d4aq1b1 d1uj3b1  
d1nbqa1 d1fh511 d2ck011 d2ywza\_ d1q7211 d4nxbx\_ d1hila1 d4hz1b1  
d2j8811 d1zmya1 d1cd0a\_ d1a4ka1 d1psk11 d1a0qh1 d4krmb\_ d1ncbh1  
d2fbjh1 d1j8he1 d1i3ua\_ d1cf811 d1fe8h1 d2p1ya1 d1eeqa\_ d2x89a\_  
d1o10a\_ d2r01h1 d1ub5a1 d1dfbh1 d3eyvb1 d4jdvb1 d4p2cg\_ d2gsia1  
d2agj11 d1u3ha1 d2h1ph1 d1rih11 d1fskc1 d1boga1 d2a7711 d1osp11  
d1qfoa\_ d3dwta\_ d2fx711 d1rz711 d3stba1 d1pkqa1 d1b6da1 d1dzba2  
d1dzba1 d1kj2a\_ d4l1ha\_ d1rzgb1 d1dq1h\_ d12e811 d1miel1 d1jmaa\_  
d1sbs11 d1fgnh1 d1f5811 d1mqkh\_ d1ndgb1 d3qegl1 d1iail1 d2aw2a1  
d1tqbc1 d3fo2a1 d4dkaa\_ d1f8th1 d2g6011 d2ywy\_ d1uj3a1 d1yc7a\_  
d3bd3a\_ d4w6xb1 d1nmb1\_ d1i8ka\_ d1rj1b1 d1ypze1 d1p7kb1 d1kxqe\_  
d1gpoh1 d2z4qa1 d1w72h1 d1i9r11 d4qgya1 d4xt1c\_ d2qqnh1 d1cica1  
d3c08h1 d2cd0a\_ d2bdnh1 d1hnga1 d1mam11 d1nldh1 d1cr9h1 d4lcih1  
d3bkyh1 d3qg711 d1ai111 d1kxvc\_ d4iosd\_ d117ih1 d2x1qa\_ d1ub6b1

d3k74b\_ d1libgh1 d1teth1 d1ligya1 d1hxma1 d2x6ma\_ d2e71a\_ d5e03a\_  
d1qfwm\_ d2r0kh1 d1ligjb1 d1rurh1 d1plgh1 d1mj8h1 d1yuhb1 d3fmg11  
d1rzzf11 d1emtl1 d1ad9b1 d1igtb1 d1nlb11 d1d5ih1 d3k7ua\_ d4ffyh\_  
d1bwva\_ d3dvga1 d1a6ta1 d1fgvl\_ d4qxgl1 d1mim11 d1jhl1\_ d2hffb1  
d2hh011 d1qkzh1 d117t11 d1afvh1 d1iaii1 d2cjuh\_ d1um5h1 d2ghwb2  
d2ghwb1 d1kgce1 d2fgwh1 d1likfh1 d1dvfd\_ d2i24n1 d2xtjb\_ d1za3b1  
d2yc1a\_ d2hh0h1 d2x1oa\_ d1bvka\_ d1rjla1 d5e7ba1 d1igta1 d1il1b1  
d2fb411 d1mvua\_ d1jpt11 d32c2a1 d1fvca\_ d1iqdb1 d2hrph1 d2p4ab\_  
d4qola\_ d1p2cb1 d1wt5c\_ d1t4ka1 d5c1mb\_ d1it911 d1bz7a1 d1b2wh1  
d1e4w11 d1jnl11 d1yedb1 d1za6b1 d3u7aa\_ d1igfh1 d3gnm11 d1orsa1  
d1wejl1 d1a2ya\_ d1hxmb1 d1gafh1 d2j4wh1 d1pz5a1 d1j05a\_ d1a3rh1  
d4fq111 d1qfwh\_ d1eo8h1 d1n7mh1 d4s11a\_ d1kegh1 d5da4a\_ d1iqw11  
d3whxb1 d1vgeh1 d1deeb1 d1c12b1 d1t2ql1 d1ad9a1 d3gsnb1 d3b2uc1  
d1ggbh1 d1t3fb1 d1nak11 d4ocmc\_ d1lila1 d2v7hb3 d2esve1 d1mcoh1  
d2qr0b1 d2q3aa\_ d1ct8a1 d1kcr11 d2pxyb\_ d2uzih\_ d5c3ld\_ d3durb\_  
d1c5c11 d2ak4e1 d1d17h\_ d1xiwd\_ d1mlba1 d1rmf11 d1i7zb1 d1dlf1\_  
d2xa3a\_ d5bq7b1 d1dqqb1 d3h4211 d1legjh1 d1kcv11 d1fe811 d2j6e11  
d1f3rb2 d11k311 d1sm3h1 d1q0xh1 d1ghfh1 d7fab11 d1igch1 d1lo0h1  
d4idla\_ d5c2b1\_ d1jrh11 d1il1a1 d3zhda1 d4kfzc\_ d1b0wa\_ d1e6oh1  
d1mex11 d4krpb\_ d1fnsh1 d1ncwh1 d4hgma\_ d4eigb1 d4rzca\_ d2mpa11  
d4y5xa\_ d5en2b1 d3lrga1 d4ej1c1 d1rhha1 d1j05b\_ d1forh1 d1q9wb1  
d2wzpd\_ d2aq2a1 d1h0da1 d3revb1 d2ij0c1 d1tzha1 d4m7j11 d1k6q11  
d3b9kc1 d1igml\_ d3qeua1 d1dsf1\_ d1ce1h1 d1kcu11 d1zvha1 d1zvoa1  
d1tqbb1 d1ay111 d2qsc11 d2cgrh1 d1n10h1 d1ken11 d3eo0a1 d4n9ob1  
d1n0x11 d3k1kc\_ d2cqva1 d1fhga\_ d2k1ma\_ d2d12a1 d1biha3 d1biha1  
d1biha4 d3qp3a1 d1g1ca\_ d1gxea\_ d1cvsc2 d1cvsc1 d1xmwa2 d1m4ka2  
d2otpa2 d1biha2 d1rhfa2 d2fcba2 d2fcba1 d1wwbx\_ d1gsma2 d1lepfa1  
d1lepfa2 d2dava1 d1waaa\_ d1f97a2 d1x44a1 d1vcaa2 d1fnla2 d1fnla1  
d3b5ha2 d3h8na2 d3h8na1 d1jbja1 d1jbja2 d1pd6a\_ d1f2qa2 d1f2qa1  
d3cx2a\_ d1nbqa2 d3b5ha1 d1n26a1 d1xiwb\_ d1xaua\_ d1fltx\_ d2ifga1  
d1olla1 d1olla2 d1cs6a4 d1cs6a3 d1cs6a2 d1cs6a1 d2gw5a2 d1sy6a1  
d1xiwa\_ d1lucta2 d1lucta1 d1ry7b2 d1gl4b\_ d1qz1a3 d1olza1 d2c9aa1  
d1wwca\_ d2aq2b1 d1lenfa1 d1i4pa1 d1v1oa1 d1et9a1 d1lesfa1 d2g9hd1  
d4ohja1 d1klud1 d1bxta1 d1eu3a1 d1ty0a1 d1fnua1 d1c4qa\_ d1prtcl  
d2wv6d\_ d1prtfl\_ d1ltrd\_ d4l63b1 d1r4pb\_ d1prtd\_ d1tl0f\_ d2bosa\_  
d1prtbl d3chbd\_

**Family-94 (g.3.11.1)**

**Positive dataset contains 5 protein sequences.**

d3sw2a\_ d1szba2 d2y5fl\_ d2wphe\_ d4yzub\_

**Negative dataset contains 4092 protein sequences.**

d1m32a\_ d1libja\_ d1c7na\_ d1iuga\_ d4q75a\_ d2bkwa1 d1t3ia\_ d1n8pa\_  
d1qz9a\_ d1jff9a\_ d1eg5a\_ d1p3wa\_ d3kgwa\_ d1cl1a\_ d2ctza1 d1vjoa\_  
d2rfva\_ d1gc0a\_ d1cs1a\_ d1d2fa\_ d2ch1a1 d1qgna\_ d1pffa\_ d1c7ga\_  
d2v1pa1 d2ez1a\_ d1u08a\_ d1lc5a\_ d1b5pa\_ d2ay1a\_ d1bw0a\_ d3pd6a\_

d7aata\_ d2csta\_ d1j32a\_ d1fg7a\_ d4wlha\_ d1o4sa\_ d1v2da\_ d1gdea\_  
d1m6sa\_ d1v72a1 d1svva\_ d1ajsa\_ d1wsta1 d2f8ja2 d1lk9a\_ d1vp4a1  
d1xi9a1 d2gb3a1 d1jx4a2 d3gv5b1 d1t94a2 d3bq0a2 d3i2ka1 d1mpxa2  
d2x1ba\_ d3m83a1 d1sefa\_ d1sfna\_ d1rc6a\_ d1cixa\_ d1y29a\_ d1v7fa\_  
d2jtba\_ d1d1ha\_ d1g9pa\_ d1lupa\_ d1qk7a\_ d1mb6a\_ d2a2va\_ d1i25a\_  
d1hvwa\_ d2mpqa\_ d1ie6a\_ d1kqha\_ d1la4a\_ d2mxoa1 d1d10a\_ d1koza\_  
d1qk6a\_ d1emxa\_ d1lqra\_ d1c6wa\_ d2wo3b\_ d1shxa\_ d1f56a\_ d1bypa\_  
d1azca\_ d1ws8a\_ d3u25a\_ d1cuoa\_ d1id2a\_ d1rkra\_ d2iaac\_ d4dp1x\_  
d1nwpa\_ d2gima\_ d2i7sa\_ d1qhqa\_ d1gyca3 d1hfua2 d1kbva1 d1kbva2  
d1sdda1 d1sdda2 d1gyca1 d1gyca2 d1mzya1 d2bw4a1 d1aoza1 d1aoza3  
d1aoza2 d1kyaa2 d1kyaa3 d1kyaa1 d1mzya2 d4e9sa1 d1sddb1 d1sddb2  
d1hfua1 d1hfua3 d1oela2 d1oela1 d1v10a2 d1v10a3 d1v10a1 d2dara2  
d2dara1 d1wyha2 d2dloa2 d1rutx4 d1rutx3 d2cuqa2 d1x4la2 d1x4la1  
d1x3ha2 d1x3ha1 d2d8za1 d1x61a2 d1x6aa1 d1x6aa2 d2cora2 d2cora1  
d1v6ga1 d1v6ga2 d2d8za2 d1x64a1 d1x64a2 d1b8ta1 d2co8a1 d1x63a2  
d2dj7a2 d2dj7a1 d2cu8a2 d2cu8a1 d1g47a2 d1g47a1 d1j2oa1 d1wyha1  
d2dloa1 d1wiga1 d1wiga2 d2cupa2 d2cupa3 d1x68a1 d2d8ya2 d2d8ya1  
d1m3va2 d1x62a1 d1x68a2 d1x61a1 d1b8ta3 d1b8ta2 d2d8xa2 d2d8xa1  
d1x4ka1 d1x4ka2 d2cuqa1 d1m3va1 d2co8a2 d1j2oa2 d1x63a1 d2cura1  
d2cura2 d1x62a2 d2cfba1 d1dfoa\_ d1o69a\_ d1bj4a\_ d3k28a\_ d2bwpa\_  
d3lg0a\_ d2fnua\_ d3ou5a\_ d1z7da1 d1b9ha\_ d1iaya\_ d4msoa\_ d1bs0a\_  
d1s0aa\_ d1sffa\_ d3tqxa\_ d1mdoa\_ d3qboa\_ d3pgya\_ d1bjna\_ d2dkja\_  
d1ejia\_ d1vefa1 d4wxga\_ d3bs8a\_ d3gbxa1 d1w23a\_ d1a3qa1 d1iknc\_  
d3brda1 d1p7h11 d1imhc1 d1gjia1 d1zk9a1 d2cxka1 d2bema\_ d1pama1  
d1ea9c1 d1qhoa1 d2fhfa2 d2fhfa1 d1k3ia1 d1j0ha1 d1csla1 d2bhua1  
d1ledqa1 d1f1sa2 d1ut9a2 d1gvia1 d1txka1 d1zx5a1 d1qwra\_ d1jgta2  
d1ea0a3 d1ecfa2 d1q15a2 d1ct9a2 d1ao0a2 d1te5a\_ d1nepa\_ d1ds6b\_  
d1fstb\_ d2b5ea2 d2b5ea3 d2b5ea1 d2b5ea4 d2kp1a1 d2kp2a1 d1hyua3  
d1hyua4 d1j08a1 d1j08a2 d1cg2a1 d1yloa2 d1y7ea2 d1y0ya3 d1l1fwa1  
d1vixa1 d1fnoa4 d1vhoa2 d1ysja1 d1vhea2 d1z21a1 d2fvga2 d1vgya1  
d1r3na1 d2grea2 d1xmba1 d1rtqa\_ d1eixa\_ d3exra\_ d2ffca1 d2fda1  
d3n3ma1 d2czda\_ d1q6oa\_ d2yyua\_ d1vqta1 d1dbta\_ d3ldva1 d2bjca1  
d2hsga1 d1qpza1 d1ydwa2 d2nvwa2 d1h6da2 d1zh8a2 d1xeea2 d1t1ta2  
d1r0ka3 d1j5pa3 d1vkoa2 d1vm6a2 d3qvsa2 d1gr0a2 d1p1ja2 d2ovga\_  
d1sq8a\_ d1rzsa\_ d3kz3a\_ d3orca\_ d3gpdg2 d2q49a2 d1hdgo2 d2g17a2  
d2cvoa2 d2czca1 d3pwka2 d1obfo2 d1i32a2 d1zyao2 d2pkqo2 d1b7go2  
d2hjsa2 d1cf2o2 d1vkna2 d1nvmb2 d2msya\_ d2djoa1 d2r5za\_ d1au7a1  
d1f43a\_ d2lmda1 d1akhb\_ d1s7ea1 d3nara\_ d1zq3p1 d2craa1 d1mija\_  
d4uuta\_ d3a01a\_ d1x58a1 d3rkqa1 d3cmya1 d2cqa1 d2da6a1 d1e3oc1  
d1fjla\_ d1mh3a1 d1ig7a\_ d1x41a1 d1wh7a1 d1gt0c1 d2mw8a\_ d1lfup\_  
d1x2ma1 d1b72a\_ d1wi3a1 d1jgga\_ d1wjha1 d1x2na1 d1mnmc\_ d2cuea1  
d3k2aa\_ d2hosa\_ d2jwta2 d1pufa\_ d1oetc1 d2hi3a\_ d1b8ia\_ d4j19a\_  
d3lnqa\_ d1wh5a1 d1b8ib\_ d1fexa\_ d2cgra1 d1guua\_ d1ug2a1 d2cqa1  
d2ajea1 d4a69c\_ d1h8ac1 d2crga1 d2iw5b1 d1xc5a1 d1ofcx1 d2cu7a1

d1wgxa1 d2cjja1 d2ckxa1 d1gvda\_ d2iu5a1 d1zk8a1 d2g7sa1 d2fd5a1  
d2np5a1 d1z0xa1 d2id6a1 d2d6ya1 d2i10a1 d1vi0a1 d2oi8a1 d3c07a1  
d2ns7a1 d2fq4a1 d2yvea1 d1t33a1 d2o7ta1 d2np3b1 d2g7ga1 d2gena1  
d2fbqa1 d2g7la1 d2gfna1 d2g3ba1 d2jj7a1 d2hyja1 d1sgma1 d1ui5a1  
d2hkua1 d2id3a1 d4jyka1 d3lv8a\_ d1s3ga1 d1zaka1 d1s4qa\_ d3tvta2  
d1uf9a\_ d1khta\_ d1ckea\_ d1osna\_ d1p5zb\_ d4tmka\_ d3cm0a\_ d1tmka\_  
d1jaga\_ d3h86a\_ d1t0hb\_ d1nn5a\_ d2h92a\_ d3kb2a1 d2c95a1 d1yj5a2  
d1kgda\_ d1ly1a\_ d2ak3a1 d1vyva2 d1deka\_ d2grja1 d1p3ja1 d1y63a\_  
d1e4ya1 d1s96a\_ d3iija1 d1lvga\_ d1vyua2 d4e22a\_ d1qf9a\_ d1jjva\_  
d1q3ta\_ d1ki9a\_ d1lw7a2 d1teva\_ d1kjwa2 d1gsia\_ d2iyva2 d1kaga\_  
d1viaa\_ d1e6ca\_ d1m7ga\_ d1x6va3 d1g3ma\_ d1j99a\_ d1t8ta1 d1nsta\_  
d1fmja\_ d1zrha\_ d1ls6a\_ d2a3ra\_ d1aqua\_ d2zptx\_ d3ckla\_ d1teta\_  
d2gwha\_ d1z0ja1 d3umra2 d3gj0a1 d2gaoa1 d1yzga1 d1x3sa1 d1g7sa4  
d1puja\_ d1udxa2 d1kk1a3 d2o52a\_ d1jwyb\_ d1zcaa2 d1zcba2 d2fv8a1  
d2cjwa\_ d3dz8a1 d1xzpa2 d1vg8a\_ d4qxaa\_ d2ew1a1 d1x1ra1 d2bcgy\_  
d3doea1 d3cona\_ d3rega\_ d3wyga\_ d1upta\_ d2b6ha1 d1zd9a1 d1lnza2  
d1r5ba3 d1n0ua2 d1r2qa\_ d2f91a1 d2rhda\_ d3q3jb\_ d3q85a\_ d1efma1  
d1r8qa\_ d2gf9a1 d2akab1 d1ek0a\_ d1z08a1 d2gcoa1 d2dyla2 d4g01b\_  
d2cxxa1 d1svia\_ d3q72a\_ d1ni3a1 d4ac9a4 d2erxa1 d2bmea\_ d1wxqa1  
d2gf0a1 d4ldja1 d1zunb3 d1d5ca\_ d4lv5b\_ d1efca3 d1kmqa\_ d2g6ba1  
d3lrpa\_ d1tada2 d2y8ea\_ d4rd4a1 d1z06a1 d2heia\_ d3a58b\_ d1u01a2  
d1d2ea3 d1zj6a1 d2ocba\_ d3rwoa\_ d1mr3f\_ d2e9sa1 d4u5xa1 d2iwra\_  
d2fn4a1 d3bwdd\_ d2nzja1 d2atva1 d2ksqa\_ d3l43a\_ d1mkya2 d1mkya1  
d1wmsa\_ d1jn3a3 d2rmka\_ d1f6ba\_ d1f60a3 d1gota2 d1jala1 d2fh5b1  
d1g16a\_ d2wblc\_ d1m7ba\_ d1wf3a1 d1f5na2 d1t9ha2 d1z6xa1 d1z0aa1  
d2fg5a1 d2a5ja1 d2bcjq2 d1s0ua3 d1ky3a\_ d4y0va\_ d4lhwa\_ d2qmea1  
d2atxa1 d1egaa1 d1ryha\_ d1moza\_ d1nrjb\_ d2erya1 d3bfka\_ d1puia\_  
d1fzqa\_ d3j3az1 d3t5ga\_ d1shza2 d3defa\_ d2f7sa1 d3raba\_ d3tsoa\_  
d3aq4a\_ d2a17a1 d3sfva1 d3bc1a\_ d2ncda\_ d1sdma\_ d3h4sa1 d2heha\_  
d2grya\_ g3kin.1 d1br2a2 d1goja\_ d1f9va\_ d2mysa2 d1lkxa\_ d3t0qa\_  
d4db1a1 d3gbja\_ d1ry6a\_ d1v8ka\_ d1k8ka2 d1k8ka1 d3uleb1 d3i33a2  
d3i33a1 d1bupa1 d1dkgd2 d1dkgd1 d4ci6a2 d1jcfa1 d4a2ba2 d2fxua1  
d1yaga2 d1yaga1 d4cbua2 d1bupa2 d1ig8a1 d1czan2 d1czan3 d1czan1  
d1ig8a2 d1bg3a4 d1bg3a3 d1bg3a2 d1bg3a1 d3h3no1 d3h3no2 d3ezwa2  
d1hroa\_ d4gedb\_ d3zooa\_ d1mz4a\_ d1gu2a\_ d1f1fa\_ d1dvva\_ d1c6ra\_  
d1c75a\_ d1e29a\_ d1gdva\_ d1cnoa\_ d1h32b\_ d1co6a\_ d2bh4x\_ d2aiua\_  
d5cytr\_ d1jdl\_ d1i8oa\_ d2zboa\_ d3dmia\_ d1ls9a\_ d1wvec\_ d2yk3a\_  
d3ph2b\_ d1dw0a\_ d5aura\_ d1ql3a\_ d1qn2a\_ d1f1ca\_ d2nqya\_ d1h4ga\_  
d1hixa\_ d1oa2a\_ d1olra\_ d3b7ma\_ d4h7ma1 d3wp3a\_ d2vgda\_ d1lgoa\_  
d3zsea\_ d2nlra\_ d3wx5a\_ d1oa3a\_ d1m4wa\_ d1f5ja\_ d1oa4a\_ d1ks5a\_  
d4ix1a1 d2ah2a1 d1evsa\_ d1cnt1\_ d1pvhb\_ d1z7ca\_ d1huwa\_ d1bgea\_  
d1rhga\_ d1f6fa\_ d1f45b\_ d1i1rb\_ d1axia\_ d1etea\_ d3tgxb\_ d1scfa\_  
d2z3qa1 d3qb1a\_ d1hula\_ d1m48a\_ d4nkqb\_ d1eera\_ d1v7mv\_ d5e4ea\_  
d2o27a\_ d3b5ka\_ d2psma1 d4zf7a\_ d3uf5a\_ d4x51a\_ d1d9ca\_ d4ypgc1

d3oq3a\_ d1lqsl\_ d1n1fa\_ d1lau1a\_ d1wu3i\_ d3bes1\_ d3ux9a\_ d1v8fa\_  
d2ejca\_ d3muea1 d1lihoa\_ d3q12a1 d4dnxa2 d1m8pa2 d1v47a2 d1g8fa2  
d1x6va2 d2b71a\_ d3rbaa\_ d2qtra\_ d1nupa\_ d3l92a\_ d1f9aa\_ d1qjca\_  
d2h29a\_ d1vlha\_ d1lod6a\_ d1lw7a1 d4ruka\_ d2el7a\_ d1iq0a2 d1irxa2  
d1r6ta2 d1ivsa4 d2cyba\_ d1rqga2 d1j09a2 d2yxna\_ d1f7ua2 d1ffya3  
d2g36a1 d1nzja\_ d1jila\_ d1n3la\_ d1i6la\_ d1pfva2 d1h3na3 d3n9ia\_  
d3sz3a1 d1qx2a\_ d2y5ia\_ d1qlsa\_ d1psra\_ d3n22a\_ d2egda\_ d4ggfc\_  
d2wcea\_ d2luca\_ d4aqia\_ d3nsia\_ d2lp3a\_ d1j55a\_ d1a4pa\_ d1k8ua\_  
d1nsha\_ d1pvaa\_ d3fs7a\_ d2pvba\_ d1ttxa\_ d1rwya\_ d2kyfa\_ d1rk9a\_  
d1a75a\_ d1exra\_ d1tiza1 d1nyaa\_ d1g8ia\_ d1ggwa\_ d1wdcc\_ d3fwba\_  
d1ggza\_ d2o5ga\_ d1ctaa\_ d1m45a\_ d3i5gc\_ d1sl8a\_ d1fpwa\_ d2scpa\_  
d2roaa\_ d4aqra\_ d3pn7b\_ d1br1b\_ d2mysb\_ d1s6ca\_ d1bjfa\_ d2obha\_  
d1jfka\_ d1jf0a\_ d1qv0a\_ d1lkja\_ d2mlfc\_ d2m97a\_ d2d8na\_ d4by5a\_  
d1jbaa\_ d4nqga\_ d1wdcb\_ d2mysc\_ d1j7qa\_ d1s6ia\_ d1uhka2 d1r2ua\_  
d1dtla\_ d3kf9a\_ d3pn7c\_ d1qjta\_ d1fi6a\_ d1c07a\_ d1gjya\_ d1y1xa\_  
d1hqva\_ d1dvia\_ d1df0a1 d1qxpa2 d4usla\_ d1wkya2 d1uuqa\_ d3wh9a\_  
d4m1ra\_ d1xyza\_ d4xuya\_ d2je8a5 d4bf7a1 d3cuia\_ d1ur4a\_ d1qw9a2  
d1lodza\_ d2vzsa5 d1bqca\_ d2x2ya1 d1hjqa\_ d1qnra\_ d4y7ea1 d1vjza\_  
d4k68a\_ d2v3ga\_ d4hpga\_ d1nofa2 d1nq6a\_ d1h4pa\_ d1aq0a\_ d3ziza\_  
d4bs0a\_ d1ecea\_ d1h1na\_ d1ta3b\_ d1w91a2 d1i1wa\_ d1uhva2 d1us3a2  
d1legza\_ d7a3ha\_ d1tvna1 d3nyda1 d1ghsa\_ d2cyga1 d4xv0a\_ d2c8na2  
d1w32a\_ d3emca\_ d1v6ya1 d1foba\_ d2uwfa1 d2fgla\_ d3niya1 d2c0ha1  
d1rh9a1 d1yq2a5 d1szna2 d1fa2a\_ d1pama4 d5do8a1 d1ea9c3 d1hx0a2  
d2fhfa5 d1qhoa4 d1avaa2 d1m53a2 d4m8ua1 d2gjpa2 d1lwha2 d4howa1  
d1ktba2 d1j0ha3 d3vm5a1 d2x1ia\_ d1wzaa2 d1uasa2 d2diea1 d1mxga2  
d1ht6a2 d1eswa\_ d1iv8a2 d5cpsa\_ d1ud2a2 d1zjaa1 d3gbea1 d1kwga2  
d1wdpa\_ d1gcy2a d1g5aa2 d1hvxa2 d3dhpa2 d2bhua3 d4do4a1 d3qgva1  
d1e43a2 d1g94a2 d2d3na2 d1gjwa2 d1gvia3 d1x1na1 d1r7aa2 d1tz7a1  
g1apy.1 d3ljqa\_ d4toqa\_ d1wb0a1 d1w9pa1 d1eoka\_ d1itxa1 d1kfwa1  
d1goia2 d2gsja\_ d1hjxa1 d1jnda1 d1vf8a1 d3wdpp1 d3wq5a\_ d4gxpa\_  
d4hz8a\_ d1e4mm\_ d3aiua\_ d1wcga1 d1qvba\_ d3ahxa\_ d1v02a\_ d2dgaa\_  
d1pbga\_ d1vffa1 d1qoxa\_ d4ha4a\_ d1t77a2 d1mixa2 d1j19a2 d1isna2  
d2a16b2 d3syxa1 d1mkea1 d2p8va\_ d1xoda1 d1i7aa\_ d1evha\_ d1legxa\_  
d1id1a\_ d2hmta\_ d1lssa\_ d2v76a\_ d1wj1a1 d1aqca\_ d1qqga2 d1ntva\_  
d1n3ha\_ d4dbba\_ d3f0wa1 d1p3ra\_ d1wgua1 d2cy4a1 d3hqca\_ d1wvha1  
d1xr0b1 d3nvva1 d1krha3 d2h88b1 d1n62a2 d1t3qa2 d1zoyb1 d1jq4a\_  
d1ffva2 d1dgja2 d1rm6c2 d91dta1 d2ewda3 d1up7a1 d2dfda1 d1s6ya1  
d1vjta1 d7mdha1 d1hyea1 d1t2da1 d1ojsa3 d1b8pa1 d1hyha1 d1civa1  
d2a92a1 d1ez4a1 d1i0za1 d1y6ja1 d1gv0a1 d1ur5a1 d1l1lda1 d1lobba1  
d1v8ba1 d1gdha1 d1l7da1 d2dlda1 d1mx3a1 d1ygya1 d1li4a1 d1j4aa1  
d2naca1 d1npya1 d3t4ea2 d1a4ia1 d1o0sa1 d2hk9a2 d2egga2 d1b26a1  
d1bvua1 d1gq2a1 d1c1da1 d1leha1 d1gtma1 d1euza1 d1nvtal d3dona2  
d1ledza1 d1vi2a1 d1p77a1 d1nyta1 d1b0aa1 d1vl6a1 d1v9la1 d1txga2  
d3f47a1 d1mv8a2 d2pv7a2 d1xc2a3 d2ahra2 d4xiya1 d2f1ka2 d1pgja2

d1i36a2 d1np3a2 d1lj8a4 d1teaa3 d1qmg2 d2i76a2 d2g5ca2 d1wdka3  
d1dlja2 d3cuma3 d1kola2 d1f8fa2 d1qora2 d1jqba2 d1vj0a2 d1cdoa2  
d1gu7a2 d1d1ta2 d1xa0a2 d2dm6a2 d1jvba2 d1rjwa2 d1llua2 d1tt7a2  
d1piwa2 d1o89a2 d1liz0a2 d1e3ja2 d1yb5a2 d1uufa2 d1vj1a2 d1e3ia2  
d3gpdg1 d1vc2a1 d2nvwa1 d1u8fo1 d1ydwa1 d1hdgo1 d2g17a1 d1cf2o1  
d2czca2 d1r0ka2 d1lobfo1 d2cvoa1 d1ebfa1 d1h6da1 d1i32a1 d1zh8a1  
d2q49a1 d1qkia1 d1j5pa4 d3pzra1 d1xeaa1 d1vkoa1 d1vm6a3 d3qvsal  
d2pkqo1 d1b7go1 d1gr0a1 d1p1ja1 d1lc0a1 d1j0xo1 d3pwka1 d2hjsa1  
d1zyao1 d1vkna1 d1t1ta1 d1nvmb1 d3sjua\_ d3ojfa1 d1xu9a1 d2jjya1  
d1n7ha\_ d1y1pa1 d1h5qa\_ d1jtva\_ d4fs3a\_ d2bkaa1 d1gy8a\_ d2c5aa1  
d1ulsa\_ d1ooea\_ d2b69a1 d1y5ma1 d1spxa\_ d1ae1a\_ d1bxka\_ d1ydea1  
d1gega\_ d1hdoa\_ d1o5ia\_ d1e6ua\_ d1snya1 d2rhca\_ d3zv4a\_ d5ceja\_  
d2d1ya1 d1fjha\_ d3w8ea\_ d2fmua1 d1x1ta\_ d1rpna\_ d3ay7a1 d1k2wa\_  
d1eq2a\_ d2hrba1 d3ruaa\_ d2ew8a1 d4hwka\_ d1xgka\_ d2bd0a1 d1yo6a1  
d2a35a1 d2ntva\_ d1vl8a\_ d1hdca\_ d4bkua\_ d2ag5a1 d2q45a\_ d1nffa\_  
d4iy1a\_ d1zbqa1 d1kewa\_ d1ek6a\_ d1ja9a\_ d2q46a2 d1iy8a\_ d1cyda\_  
d2ptga\_ d1hxha\_ d1uzma1 d3ly1a\_ d4m89a\_ d3wyea\_ d2b11a1 d1w6ua\_  
d1sb8a\_ d2q2va\_ d4nr0a\_ d1e6wa\_ d2gasa\_ d3oiga1 d2bgka1 d1mxha\_  
d1vl0a1 d1rkxa\_ d1r6da\_ d1wmaa1 d1e7wa\_ d2c07a1 d1xkqa\_ d3tzha\_  
d1g0oa\_ d3lz6a\_ d1qyca\_ d1edoa\_ d1oc2a\_ d1t2aa\_ d1zema1 d2xoxa\_  
d1z45a2 d1geea\_ d1p33a\_ d3lt0a\_ d4e6pa\_ d2wyua\_ d1db3a\_ d4q9na\_  
d1xh1a\_ d4o1ma\_ d1fmca\_ d2uvda\_ d2gdza1 d1uaya\_ d2z1ma\_ d2o23a2  
d2fr1a2 d2fr1a1 d1qsga\_ d1qyda\_ d4zjua\_ d2a4ka1 d1yb1a\_ d1wvga1  
d1yxma1 d3f4ba\_ d1mg5a\_ d1xg5a1 d1r55a1 d3gboa\_ d1atla\_ d1kufa\_  
d1buda\_ d4q11a\_ d1quaa\_ d1yp1a\_ d1wnia\_ d1e2ta\_ d4c5pa\_ d2bsza1  
d4bgfa\_ d1w4ta1 d3u1ra1 d1g9ka2 d1kapp2 d1k7ia2 d2w0pa\_ d2diaa1  
d2e9ia2 d2e9ja1 d2dj4a1 d2eeba1 d2diba1 d2dmba1 d2dmca1 d2d7oa1  
d2ee6a1 d2d7pa1 d2eeaa1 d2di8a1 d1wlha1 d2d7na1 d2nqca\_ d2d7ma1  
d2dica1 d3cnka\_ d2k3ta1 d2eeca1 d1qfha1 d1qfha2 d2bp3a1 d1v05a\_  
d2ee9a1 d2eeda1 d2di9a1 d3ioqa\_ d1fh0a\_ d1o0ea\_ d1khqa\_ d1m6da\_  
d2cb5a\_ d1cs8a\_ g8pch.1 d1s4va\_ d2pnsa\_ d1vsna1 d1mira\_ d1iwda\_  
d2oula\_ d7pcka\_ d3bwka\_ d3bcna\_ d2p86a\_ d1pvja\_ d1pcia\_ d1gece\_  
d1deua\_ d4bs6a\_ d1xkga1 d1cqda\_ d1jqpa2 d2c0ya\_ d2bdza\_ d3p5ua\_  
d1zoya1 d1qo8a2 d1d4ca2 d1chua2 d1jnra2 d2jk6a2 d2jk6a1 d1fecal  
d1fecal d1lpfa1 d1lpfa2 d1xhca1 d1xhca2 d1dxla2 d1dxla1 d1gera2  
d1m6ia2 d1onfa1 d1onfa2 d3lada2 d3lada1 d1w4xa1 d1w4xa2 d1gesa2  
d1mo9a1 d1xdia1 d1f12a2 d1f12a1 d1fcda1 d1fcda2 d1h6va1 d1mo9a2  
d1gv4a2 d1gv4a1 d2gv8a2 d2gv8a1 d1aoga1 d1aoga2 d1hyua1 d1ebda1  
d1ebda2 d3dk9a1 d1q1ra2 d1q1ra1 d1gesa1 d1g4ma1 d1g4ma2 d1o94a2  
d1lqta1 d1cjca1 d1pn0a1 d1reoa1 d1ju2a1 d2f5va1 d3c96a1 d2gmha1  
d1pj5a2 d1gpea1 d1o5wa1 d1n4wa1 d1k0ia1 d2dw4a2 d2ivda1 d1seza1  
d2voua1 d1kdga1 d1s5ja1 d2hbja2 d2igia\_ d1wlja\_ d1qhta1 d4dleal  
d1tgoa1 d2f96a1 d3tr8a1 d3mxma\_ d1q8ia1 d1y97a1 d1w0ha\_ d1kfsa1  
d2py5a1 d1d5aa1 d1yt3a3 d2guia\_ d3mwpa1 d4kbl1a\_ d1b9ra\_ d1offa\_

d1frra\_ d3wcqa\_ d1e9ma\_ d1l5pa\_ d1lwria\_ d1i7ha\_ d3av8a\_ d1czpa\_  
d1rfka\_ d3plma1 d3b2ga\_ d2bt6a2 d1wgqa1 d1v89a1 d2coda1 d1zc3b\_  
d1wg7a1 d1u5ea1 d1v61a1 d2coca1 d2ys1a1 d1v5pa1 d1nty2 d1wjma1  
d1wila1 d1u29a\_ d1xx0a1 d1unqa\_ d2zkmx3 d1fhoa\_ d1v88a1 d2adza1  
d1x1fa1 d1p6sa\_ d2coaa1 d1btka\_ d1v5ma1 d1faoa\_ d2x18a\_ d1dyna\_  
d1x1ga1 d4kaxb\_ d2j59m1 d1ki1b2 d1xcga2 d1txda2 d1u5da1 d1dbha2  
d1wlha\_ d1upqa\_ d1v5ua1 d1foea2 d2fjla1 d1eaza\_ d2dfka2 d2cofa1  
d1kz7a2 d1jmx2 d1jmx1 d1pbya2 d1r7ha\_ d1faaa\_ d1wika1 d1xfla\_  
d1ttza1 d2f51a1 d1ti3a\_ d1nhoa\_ d1sena\_ d2i4aa\_ d1ep7a\_ d1zmaa1  
d1fo5a\_ d3lefa1 d3diea1 d2yana1 d1z6na1 d1oaza\_ d3zywa1 d4aj8a\_  
d1nm3a1 d4fiwa\_ d1wmja\_ d4hs1a1 d1liloa\_ d1xwaa1 d1wjka1 d2vm1a\_  
d1fb6a\_ d1gh2a\_ d1h75a\_ d1nw2a\_ d1kx5b\_ d3a6na\_ d4m6ba2 d2nqbd\_  
d3wkjd\_ d2yfwe\_ d4h9na\_ d5bnxa\_ d1kx5c\_ d3r45a\_ d1eqzb\_ d4jjnb\_  
d1f66c\_ d1eqza\_ d4wnnb\_ d1kx5a\_ d1u35c1 d1id3a\_ d2nqbc\_ d1kx5d\_  
d1tafa\_ d1bh9b\_ d1tafb\_ d1jfib\_ d1q9ca\_ d1h3ob\_ d2byka1 d4g92b\_  
d1bh9a\_ d1jfia\_ d1h3oa\_ d2bykb1 d1n1jb\_ d1pd212 d2a2ra2 d1k0dd2  
d1f2ea2 d1gsua2 d1f3ba2 d2fhea2 d2pvqa1 d1tw9a2 d1oyja2 d1e6ba2  
d1k0ma2 d3ik7a1 d4is0a1 d1r5aa2 d1jlva2 d1m0ua2 d3gtub2 d1z9ha2  
d1okta2 d1axda2 d2gsra2 d1tu7a2 d1k3ya2 d1zgma1 d1b48a2 d1gnwa2  
d1gwca2 d2gsta2 d1glqa2 d1oe8a2 d1pn9a2 d1v2aa2 d1fw1a2 d1duga2  
d1y14b1 d2nn6i1 d1i941\_ d2zjra2 d1smxa\_ d2qamc2 d1hh2p1 d2r7da1  
d1rl2a2 d1wfga1 d3bzka4 d1x6oa2 d3a0ja\_ d2j01d2 d2ja9a1 d4q15a\_  
d1hr0w\_ d1luza\_ d2n3sa\_ d2vnud1 d1h95a\_ d1go3e1 d2nn6h1 d2mola\_  
d1iz6a2 d1jjga\_ d1e3pa2 d2ix0a3 d2ix0a2 d2lxja\_ d1ueba3 d1ueba2  
d2z0sa1 d1u0la1 d2ix0a1 d2eifa2 d2je6i1 d3i2za1 d2c35b1 d2ahob2  
d1t9ha1 d3i4oa\_ d2qall1 d1jt8a\_ d2nn6g1 d1g6pa\_ d3cama\_ d1i94q\_  
d1c9oa\_ d1d7qa\_ d2ba0a1 d2vnud2 d2vnud3 d1khia2 d2qalq1 d1wi5a1  
d1xtda2 d1ny4a\_ d1qqya\_ d1gd6a\_ d1f6ra\_ d1livma\_ d2gv0a\_ d1iiza\_  
d2z2fa\_ d1j8xa\_ d1ghla\_ d1b9oa\_ d1741a\_ d1691a\_ d2o4wa\_ d1p37a\_  
d1k28a3 d1xjta1 d1jtma\_ d2f2qa\_ d4e97a1 d4qgna\_ d1vr3a1 d2pjsa1  
d1klla\_ d2i7ra1 d1ecea\_ d1xqaa1 d5cj3a1 d1npba\_ d1jifa\_ d2p7oa\_  
d1nkia\_ d1mpya2 d1kw3b2 d1kw3b1 d4ghga1 d1tfza1 d3isqa1 d3isqa2  
d1sqia1 d1sqia2 d1lkda2 d1lkda1 d1mpya1 d1cjxa2 d1cjxa1 d1sp9b2  
d1t47a1 d1t47a2 d1f1ua2 d1sp8a1 d1sp8a2 d1f1ua1 d1etob\_ d1lumqa\_  
d1g2ha\_ d1iyka2 d1iyka1 d1rxta1 d1iica2 d1qsta\_ d2beia1 d4m3sa\_  
d1u6ma1 d1ygha\_ d1yk3a1 d3dr6a\_ d1xmta\_ d1z4ea1 d2ge3a1 d1bo4a\_  
d2fiaa1 d2jdca1 d1y9wa1 d3to7a\_ d1wwza1 d2fl4a1 d2ozua1 d2b5ga\_  
d2cy2a1 d2p0wa\_ d1cm0a\_ d4pswa\_ d1yrea1 d1yr0a1 d1m4ia\_ d2gana1  
d1yvka1 d2g3aa1 d1y7ra1 d2euia1 d1q2ya\_ d2fsra1 d1xeba\_ d2ae6a1  
d1cjwa\_ d1qsma\_ d2aj6a1 d1y9ka1 d1i12a\_ d1vkca\_ d2atra1 d1n71a\_  
d2d4pa1 d2fiwa1 d2fe7a1 d1tiqa1 d2ou2a\_ d1yx0a1 d2fcka1 d1p0ha\_  
d2j8ma\_ d2pq8a\_ d1z4ra1 d1s3za1 d1ufha\_ d1c4qa\_ d1prtc1 d2wv6d\_  
d1prtf\_ d1ltrd\_ d4l63b1 d1r4pb\_ d1prtd\_ d1tl0f\_ d2bosa\_ d1prtb1  
d3chbd\_ d1xvqa1 d1pn0a2 d3hy2a\_ d2cvba1 d1o8xa\_ d1we0a1 d2bmx1

d2a4va1 d1psqa\_ d1xiya1 d1q98a\_ d1n8ja\_ d1zofa1 d2ggta\_ d3tjja\_  
d4je1a1 d1o73a\_ d3s9fa\_ d2zcta\_ d1qmv\_a\_ d1jfua\_ d2b1ka\_ d5dvba1  
d2b5xa1 d2v2ga\_ d1st9a\_ d3tb2a\_ d41lra\_ d4fh8a1 d1e2ya\_ d1knga\_  
d2h30a\_ d1i5ga\_ d2z9sa\_ d2f8aa1 d1tp9a1 d2b7ka\_ d1nm3a2 d3hvva\_  
d2wfca1 d4kcea\_ d1xvwa1 d4gqca1 d3qpma\_ d4k1fa\_ d1zzoa1 d1gpla\_  
d1prxa\_ d4od7a1 d1z6ma1 d4mcua1 d4dvca1 d1r4wa\_ d3l9sa\_ d1un2a\_  
d3rppa\_ d1zsqal d2m5ta\_ d1cqqa\_ d1wqsa\_ d5bpea\_ d2ipha\_ d1lvoa\_  
d2bhga1 d3tnta\_ d3sjia\_ d3d23a1 d2fyqa\_ d3tloa\_ d3zvea1 d2hrva\_  
d3q3ya1 d4asha1 d2phla2 d1fxza2 d1fxza1 d1lrha\_ d1uija1 g1dgw.1  
d2v09a\_ d1uika2 d1uika1 d1dgwa\_ d4aw8a\_ d1etha2 d1w52x1 d2ppla1  
d1hpla2 d2oxea1 d1bu8a2 d1rpla2 d1ys1x\_ d4hs9a\_ d1ex9a\_ d1ku0a\_  
d3qmma\_ d1dy2a\_ d1ra6a\_ d3gsza\_ d1khva\_ d1te9a\_ d2xwha\_ d3uqsa\_  
d3hkwa\_ d3n6ma\_ d2cjqa\_ d2xyma\_ d1teba\_ d1te8a\_ d1s48a\_ d1u09a1  
d4wfxa\_ d3tyqa\_ d2pgga1 d2h1ia1 d2r8ba1 d3b5ea1 d3cn9a\_ d1auoa\_  
d1lgya\_ d4l3wa\_ d1gz7a\_ d1ukca\_ d3groa\_ d1thta\_ d1ei9a\_ d1svpa\_  
d1mbma\_ d3su6a1 d1cula1 d4agka\_ d1vcpa\_ d1q31a\_ g1n11.1 d3e90b\_  
d1ep5a\_ d3u1jb\_ d3zxha\_ d1cgl\_a\_ d1rm8a\_ d1leaka2 d1hy7a\_ d2jsda\_  
d1cxva\_ d1hv5a\_ d3p0ya1 d1lgral d1lgra2 d1n8yc2 d1n8yc1 d1m6ba2  
d1m6ba1 d1m41a\_ d2bk7a\_ d3fjua\_ d1z5ra1 d1kwma1 d1uwya2 d2c1ca1  
d1dtda\_ d1h81a2 d2tbvc\_ d1x36a\_ d1smvc\_ d1ng0c\_ d4sbvc\_ d1lopa\_  
d1f2nc\_ d1ddla\_ d1auyb\_ d1js9c\_ d1f15b\_ d1za7a\_ d1rypd\_ d1lrua\_  
d1rypc\_ d3unfk\_ d1rypa\_ d1j2pa\_ d1lru1\_ d1j2qh\_ d3unfh\_ d1m4ya\_  
d1rypb\_ d1lru1\_ d1lirug\_ d1lru2\_ d1q5rh\_ d1rypg\_ d1g3ka\_ d1liruf\_  
d1q5qa\_ d1e94a\_ d1lirub\_ d1ryph\_ d3ty6a\_ d1lruj\_ d1lruk\_ d1rype\_  
d1lirud\_ d1lirue\_ d3mi01\_ d1rypf\_ d1lruh\_ d2z3ba\_ d1liruc\_ d3mka2\_  
d1lru1\_ d1e88a1 d1l6ja4 d1leaka4 d1leaka3 d1l6ja3 d1h8pa2 d1h8pa1  
d1ny721 d1ny722 d1a6ca3 d1a6ca2 d1a6ca1 d1pgl21 d1pgl11 d1ny711  
d1mqta\_ d1d4m3\_ d1fmd3\_ d2mev1\_ g1aym.1 d1ev13\_ d4q4w1\_ d1r1a3\_  
d2x5ia\_ d1rhi1\_ g1r1a.1 g1d4m.1 g1rhi.1 d1b35b\_ d1lopa\_ d1tme1\_  
d4iv1a\_ g1pvc.1 g1fpn.1 d1fpn1\_ d4gb31\_ d1d4m1\_ d1fmd1\_ d1ev11\_  
d2wzr3\_ g1cov.1 d1qqp3\_ g1fmd.1 d2x5ic\_ d1rhi3\_ g1loop.1 d1hxs1\_  
g1hxs.1 d1fpn3\_ d1bev1\_ d1eah3\_ d1aym1\_ d1pvc3\_ d1qqp1\_ d1zba3\_  
d1h8ta\_ d3vbhc\_ g1b35.1 g1bev.1 d1hxs3\_ g1ev1.1 d1bev3\_ g1tmf.1  
d1tmf1\_ d1b35a\_ d2mev3\_ g1eah.1 g1h8t.1 d1eah1\_ d4q4w3\_ d1r1a1\_  
d1aym3\_ d1pvc1\_ d1zba1\_ d1h8tc\_ d1loopc\_ d1tme3\_ g1qqp.1 d4iv1c\_  
g1tme.1 d1ju8a\_ d4w9ta\_ d1jvna1 d4x2ra1 d1ka9f\_ d1qo2a\_ d4axka1  
d1h5ya\_ d4u28a\_ d2y88a\_ d4wd0a\_ d1vzwa1 d1ix2a\_ d4lt9a1 d3tc7a1  
d3hoja\_ d3vnda\_ d3n18a1 d1geqa\_ d3nava1 d1v5xa\_ d4a2ra1 d3tc6a1  
d1ujpa\_ d4ijba\_ d1xcfa\_ d1vc4a\_ d1rd5a\_ d1qopa\_ d3b5va\_ d2r80b\_  
d1cqxa1 d1cg5a\_ d1gcvb\_ d3boma\_ d2h8fb\_ d2raoa\_ d3bj1a\_ d4hrrb\_  
d2r50a\_ d3d1kb\_ d2aa1b1 d3zhwa\_ d3hf4b\_ d3gdja\_ d1jebb\_ d3bj1b\_  
d1x9fb\_ d1wmub\_ d1gcva\_ d3bcqb\_ d3d4xb\_ d1gvha1 d2dc3a\_ d3hf4a\_  
d4yu3a\_ d3k8ba\_ d1qpwb\_ d2r80a\_ d3bcqa\_ d1v4wa\_ d3wtgb\_ d1j17a\_  
d4esaa\_ d1a9we\_ d3d1ab\_ d1fsla\_ d4h21a\_ d1v4wb\_ d1mwca\_ d1vhba\_



d1jeba\_ d1spgb\_ d1h97a\_ d1q1fa\_ d1tu9a1 d3d1aa\_ d1hdsb\_ d3hyub\_  
d2zfb\_ d3fs4a\_ d1oj6a\_ d1shrb\_ d4h21b\_ d4yu3b\_ d1spga\_ d3hrwa\_  
d3qqra\_ d3at5a\_ d4wchd\_ d3hyua\_ d1cg5b\_ d1uc3a\_ d1hbra\_ d2raob\_  
d1outb\_ d4esab\_ d3gdjb\_ d3qqqa\_ d1x9fc\_ d3vrfa\_ d1litha\_ d3mkba\_  
d3d4xa\_ d3mjpa\_ d1j16a\_ d3fh9a\_ d1outa\_ d2dc3b\_ d1lit2a\_ d3eoka\_  
d3g46a\_ d1qpwa\_ d3vrfb\_ d1ch4a\_ d1x9fd\_ d1hdsa\_ d2zfb\_ d3mkbb\_  
d1or4a\_ d3wtga\_ d1a4fa\_ d3fh9b\_ d3bomb\_ d3cy5a\_ d3at5b\_ d1x9fa\_  
d2oifa\_ d4lmxb\_ d1cpcb\_ d3v57a\_ d1kn1a\_ d1cpca\_ d4f0ta\_ d2vjha\_  
d4po5b\_ d1eyxa\_ d1alla\_ d4f0tb\_ d1b33b\_ d4h0mb\_ d1b33a\_ d2vjhb\_  
d4lm6b\_ d2vmlb\_ d1a11b\_ d2vjta\_ d3dbja\_ d2vmla\_ d2vjtb\_ d4f0ub\_  
d1f99b\_ d4rmpa1 d1liaa\_ d1eyxb\_ d2uulb\_ d4lmsb\_ d4f0ua\_ d2bv8a\_  
d1f99a\_ d2bv8b\_ d2c71b\_ d3dbjb\_ d4rmpb1 d1b8da\_ d4h0ma\_ d3v57b\_  
d1kn1b\_ d1liab\_ d2uula\_ d2j96a\_ d1pjqa1 d3ia2a\_ d4dgqa1 d1hkha\_  
d1zoia\_ g1wht.1 d2xqfa\_ d1ea5a\_ d1dx4a\_ d1qe3a\_ d1k4ya\_ d4qwwa\_  
d2ha2a\_ d1r88a\_ d1sfra\_ d4qeka\_ d3c8da2 d2pbla1 d1jkma\_ d1jjia\_  
d1lzl\_ d2qvba\_ d2v9za\_ d4kafa1 d1jmx4 d1pbya3 d1pbya4 d1xm5a\_  
d1xaxa\_ d1tvia\_ d4iuua3 d4bvva\_ d5hpga\_ d3k65a\_ d1ki0a3 d1ki0a2  
d1ki0a1 d1a0ha1 d1pmla\_ d3sp8a3 d2feba1 d1mdwa\_ d1ziva1 d1zcm1  
d1f74a\_ d3l21a\_ d2e1da\_ d1to3a1 d1w3ia\_ d1sfla\_ d1n7ka\_ d1vcva1  
d4imea\_ d1wa3a\_ d2ocza1 d1f2ja\_ d3m16a\_ d2yxga\_ d1ub3a\_ d3a5fa\_  
d1fbaa\_ d1l6wa\_ d1xfba1 d1wx0a1 d1vpxa1 d1ojxa\_ d1mxsa\_ d2a4aa1  
d1xkya1 d3cq0a1 d3s1xa\_ d1f05a\_ d1fdja\_ d3cpra1 d4d2ja\_ d4mh8a\_  
d4i7ga1 d3rp2a\_ g1lucy.1 d1fuja\_ d2zchp\_ d3w94a\_ d1si5h\_ d1lo6a\_  
g2pka.1 d1cgha\_ d1kigh\_ d1a5ia\_ d3s9ba\_ d1hj8a\_ d1ao5a\_ d2anya\_  
d1q3xa1 d1gvza\_ d1azza\_ d4gsoa\_ d2f91a1 d1iaua\_ d1gdna\_ d1eufa\_  
g1fiw.1 d1eq9a\_ d4nfea\_ d2rdla\_ d1spja\_ d1elva1 d1a7sa\_ d1ekbb\_  
d1pfxc\_ d1yc0a\_ d2aiqa\_ g1fiz.1 d1fi8a\_ d4k60a\_ d4dgja\_ d1mzaa\_  
d1op0a\_ d3tjva\_ d1pytd\_ d1sgfg\_ g1gg6.1 d2eeka\_ g1rtf.1 d1a0ja\_  
d3g01a\_ d1pytc\_ d4e7na\_ d1ddja\_ d1z8ga1 d1npma\_ d1brup\_ g1jou.1  
d1sgfa\_ d1autc\_ g2hnt.1 g1kdq.1 d1orfa\_ d3s69a\_ d4crga\_ d1fxya\_  
d1bqya\_ d2ftba\_ d1pmpa\_ d2rcqa1 d1fdqa\_ d4lkpa\_ d1sa8a\_ d1vyfa\_  
d1lpja\_ d3vg7a1 d4azqa1 d1o8va\_ d5bvqa\_ d1p6pa\_ d2qo4a\_ d1opba\_  
d1yiva1 d1o1va\_ d4bvma1 d4tkba\_ d4i3ba\_ d1bwya\_ d1ftpa\_ d1ggla\_  
d4gkca\_ d1cbia\_ d3p6da1 d1kqwa\_ d2a0aa1 d1dzka\_ d4tlja\_ d2a2ua\_  
d4wfva\_ d3tlda\_ d4iaxa\_ d3zq3a\_ d2nnda\_ d1i4ua\_ d1kxoa\_ d1bbpa\_  
d1kt7a\_ d1exsa\_ d3s26a1 d1lf7a\_ d4gh7a\_ d1z24a1 d1qabe\_ d1xkia\_  
d1ew3a\_ d3bx7a\_ d4iawa1 d1n0sa\_ d1gkab\_ d3kzaa\_ d2k23a\_ d2l9ca1  
d2joza1 d1gm6a\_ d3kffa\_ d3saoa1 d1e5pa\_ d1yupa1 d1iua\_ d1t3ca\_  
d1epwa3 d2a97a\_ d3fiea\_ d1iwea\_ d1qf5a\_ d1vmaa2 d1nija1 d1np6a\_  
d2p67a1 d3ihla\_ d1okkd2 d1ls1a2 d1s1ma2 d1liona\_ d2v40a\_ d3hida\_  
d2vola1 d2g0ta1 d1vcoa2 d1j8mf2 d1g3qa\_ d1xjca\_ d1p9ba\_ d1qzxa3  
d1ihua2 d1ihua1 d2qm8a\_ d1dj2a\_ d4ioja\_ d1cp2a\_ d1yrba2 d1hyqa\_  
d3gqba2 d1skye3 d1xp8a1 d1tf7a2 d1tf7a1 d1ye8a1 d1skyb3 d2qe7d2  
d4blta\_ d4huta\_ d3l1daa2 d4hyya\_ d2i3ba1 d1crla\_ d3j9tb2 d3ntua2

d1vdza1 d2z43a\_ d1e9ra\_ d1nlfa\_ d3ziaa2 d1n0wa\_ d1g6oa\_ d3ziad2  
d3j9ta2 d1pzna2 d3gqbb2 d2i49a\_ d1nnfa\_ d1xvxa\_ d1ursa\_ d1h3da1  
d1iuda\_ d4m1va1 d1twya\_ d3e13x\_ d2nxoa1 d4pfua\_ d3ttma\_ d1elja\_  
d2qmw1a1 d1us5a\_ d1y3na1 d1jeta\_ d1uqwa\_ d4f19a1 d2esna2 d3thia\_  
d3fasa1 d2uyeb\_ d2xwva1 d1r91a\_ d2fyia1 d1pb7a\_ d2ozza1 d1sw5a\_  
d1nh8a1 d1vr5a1 d2g29a\_ d1xs5a\_ d3lswa\_ d2z23a\_ d3w9va\_ d3tcha\_  
d1q35a\_ d1z7me1 d3q27a\_ d1p99a\_ d1ve4a1 d2i6ea1 d4mcoa1 d4n8ya\_  
d1eu8a\_ d1zbma1 d1ixca2 d1j1na\_ d1xvya\_ d1y9ua\_ d2z22a1 d1xoca1  
d4oera\_ d1wdna\_ d5f1qa1 d1xt8a1 d1i6aa\_ d4gwoa\_ d4igta1 d1pc3a\_  
d4mmpa1 d1o63a\_ d2czla1 d2onsa2 d4mija1 d4ok5a1 d2bmfa1 d2bmfa2  
d1yksa1 d1yksa2 d1jr6a\_ d2qeqa1 d2j1qa1 d1a1va2 d1eh3a\_ d3skpa\_  
d1dtza1 d1dtza2 d1jnfa2 d1ce2a1 d1jnfa1 d1b1xa2 d1b1xa1 d1jw1a1  
d1jw1a2 d1ryoa\_ d1h76a1 d1h76a2 d1c4oa1 d2p6ra3 d2p6ra4 d1oywa2  
d1oywa3 d1wrba1 d1w36b2 d1w36b1 d1c4oa2 d3bora\_ d1t6na\_ d2eyqa5  
d2eyqa3 d2eyqa2 d2zu6a2 d1veca\_ d1uaaa1 d1w36d1 d2g9na1 d1z3ix2  
d2rb4a\_ d1hv8a1 d1hv8a2 d1t5ia\_ d1w36c2 d2j0sa2 d2j0sa1 d1fuka\_  
d3hjha1 d1z5za1 d1z63a1 d1s2ma2 d1s2ma1 d1wp9a1 d1wp9a2 d1gm5a3  
d1gm5a4 d3dina4 d3dina3 d1q0ua\_ d1w36c1 d1z3ix1 d1nkta3 d1nkta4  
d1uaaa2 d1w36d2 g1qhh.1 d2fwra2 d2fwra1 d3q3ma\_ d1za0a1 d1mxra\_  
d2inca\_ d1jk0a\_ d2incb\_ d1mhyb\_ d3hf1b\_ d1mtyb\_ d1r2fa\_ d2uw1a\_  
d1mhyd\_ d3n37a\_ d1afra\_ d1oquc\_ d1syya\_ d1mtyd\_ d2o1za\_ d1uzra\_  
d1smsa\_ d2fkza\_ d1zujal d1s3qa1 d2fjca1 d1z6om1 d1veia\_ d4dyya\_  
d1jiga\_ d3gvya\_ d2pyba\_ d4cy9a1 d3bvfa1 d1r03a\_ d2cf7a\_ d1nf4a\_  
d1zs3a1 d4iwka\_ d3ka8a\_ d3np0x\_ d1n1qa\_ d11b3a\_ d4e6ka\_ d1z6oa1  
d2fzfa1 d4dyua\_ d3ge4a\_ d1jgca\_ d4am4a\_ d2z6ma\_ d1ji5a\_ d1vlga\_  
d11koa1 d1krqa\_ d3qz3a\_ d1o9ra\_ d2ffxj\_ d1euma\_ d1yv1a1 d2v2pa\_  
d1j30a\_ d4di0a\_ d1dpsa\_ d1oewa\_ d2qzxa\_ d2asia\_ d1psoe\_ d1miqa\_  
d1smra\_ d2h6ta\_ d1pfza\_ d1lizda\_ d3hd8a\_ d1j71a\_ d1dpja\_ d4aa9a\_  
d1t6ex\_ g1b5f.1 g1lya.1 g1htr.1 d1qdma2 d1bxoa\_ d1wkra\_ d1tzsa\_  
d2qzwa\_ d1ex4a2 d1bdqa\_ d3ggta\_ d3ixoa\_ d1mrx\_ d2haha\_ d1tw7a\_  
d4njjsa\_ d1sgua\_ d2p3da\_ d1nsoa\_ d3d3ta\_ d2rkfa\_ d1c6ya\_ d2rspa\_  
d3ogpa\_ d3ekwa\_ d2o4na\_ d2j9ja\_ d1baia\_ d3ggua\_ d3lzua\_ d4npua\_  
d4j55a\_ d2r8na\_ d2fxda\_ d2p3ca\_ d4dqea\_ d3ttpa\_ d3t3ca\_ d2p3aa\_  
d2hc0a\_ d2fdda\_ d3mwsa\_ d1sr9a2 d1rqba2 d1k8rb\_ d1wgra1 d1ef5a\_  
d1wfy1a1 d1e8ya3 d1wgya1 d1lfda\_ d2cs4a1 d1wxma1 d2bye1a1 d3kh0a1  
d2byfa1 d1wxaa1 d1e7ua3 d1zbf1a1 d2z1ha\_ d2etja1 d3qioa1 d1j11a\_  
d2e41a\_ d1j12a\_ d21sna1 d1uaxa\_ d2yv0x\_ d1mu2a1 d1ekea\_ d1i39a\_  
d1wgda1 d1wga1 d4q5eb\_ d1wjna1 d1se9a\_ d3n3kb\_ d1wz0a1 d1we6a1  
d2m0xa\_ d2gbka\_ d3rt3b1 d1wh3a1 d1sifa\_ d2ekek2 d4ii2b1 d4hk2a1  
d1c3ta\_ d1m94a\_ d1wgha1 d1ttna1 d1wx8a1 d3v6cb1 d2ma9b\_ d4i61b1  
d1bt0a\_ d2jvca1 d1iyfa\_ d2k1fa\_ d1wxva1 d1wf9a1 d1t0ya\_ d2io0b2  
d1x1ma1 d2gbma\_ d1zw7a1 d2m17a\_ d1ud7a\_ d1we7a1 d21wpa\_ d2gbja\_  
d1wjua1 d1v6ea1 d1v86a1 d4eewa\_ d1wiaa1 d4icva\_ d4gu2a\_ d1wx7a1  
d1wy8a1 d4hjka1 d2faza1 d1v5oa1 d3ruib\_ d3waob\_ d2r2qa1 d3m95a\_

d3wana\_ dlepwa1 dlyvca1 dlyeza1 d4lu0a\_ dlof8a\_ d3unda1 d3e9aa1  
d1vr6a2 dln8fa\_ d2qkfa\_ d1d9ea\_ dlo60a\_ d2bcgg1 d2bcgg2 d1um8a\_  
dlixza\_ d1qvra2 d1qvra3 d1qzma\_ d1sxjc2 d1jr3d2 d2p65a\_ d118qa2  
d1g8pa\_ d3hu3a3 d1sxjd2 d1in4a2 d1sxja2 d1tuea1 d2ce7a2 d1w5sa2  
d1sxjb2 d1d2na\_ d1ny5a2 d1ofha\_ d2gnoa2 d2a5yb3 d1fnna2 d1u0ja1  
d11v7a\_ d1iqpa2 d2fnaa2 d1ixsb2 d4gita\_ d1sxje2 d1g41a\_ d21j7a\_  
d1n4na\_ d2m8bb1 d2kyqa\_ d3psma\_ d1jkza\_ d1jxca\_ d2g11a\_ d1ugla\_  
d4uj0a\_ d2k4ua\_ d1hp2a\_ d2lu9a\_ d1baha\_ d2meoa1 d1wm7a\_ d1hlya\_  
d1jlza\_ d1wpda\_ d1c55a\_ d1pvza\_ d1wt7a\_ d1rjia\_ d1wz5a\_ d1m2sa\_  
d1pjva\_ d1c49a\_ d1qkya\_ d2ktca1 d1wmta\_ d1du9a\_ d1j5ja\_ d1r1ga\_  
d1xwdc1 d3kj4a\_ d1ozna\_ d1w8aa\_ d2ifga3 d1xkua\_ d1t0za\_ d2i61a\_  
d1t1ta\_ d1sn4a\_ d1kv0a\_ d21kba\_ d1npia\_ d1wwna\_ d1pe4a\_ d2kbka\_  
d21i7a\_ d1djta\_ d2kbha\_ d1dq7a\_ d1sega\_ d1omya\_ d1zywa1 d1jzaa\_  
d2jcqa\_ d1n9wa1 d1e1oa1 d1c0aa1 d1b8aa1 d110wa1 d3a74a1 d1eova1  
d1bvsa3 d1ixra2 d1iyjb4 d1iyjb5 d1iyjb3 d1o7ia\_ d4ipca1 d1x3ea\_  
d4apva\_ d1jb7a1 d1jb7a2 d1jb7a3 d3kdfa\_ d1ue1b\_ d1wjja1 d3eiva\_  
d1xjva2 d1xjva1 d2ccza2 d1se8a\_ d111oc\_ d1jb7b\_ d3ulla\_ d1qzga\_  
d1miaua4 d1miaua5 d1miaua3 d3g48a1 d1gd7a\_ d1mkha\_ d1jjcb3 d1pyba\_  
d3ubub\_ d1legia\_ d1qo3c\_ d1v7pa\_ d1tdqb\_ d3ubua\_ d1c3ab\_ d1h8ua\_  
d3bx4b\_ d1t8ca1 d1sb2a1 d1qdda\_ d2ziba1 d3cada\_ d1byfa\_ d1j34b\_  
d1jwia\_ d1jzna\_ d1c3aa\_ d1oz7b\_ d1wmza\_ d3bdwb\_ d1hq8a\_ d1fifa1  
d3hupa\_ d1wk1a1 d1umra\_ d2afpa\_ d3bx4a\_ d1gz2a\_ d1sl6a\_ d1v7pb\_  
d3g8ka\_ d1ixxa\_ d1j34a\_ d1jwib\_ d1g1sa1 d1y17a1 d1ja3a\_ d1fvub\_  
d3bdwa\_ d1sb2b1 d1fvua\_ d1umrc\_ d1oz7a\_ d4m17a\_ d3cfwa1 d1ypqa1  
d1g1ta1 d3fd4a\_ d3l9jc\_ d4dn8a1 d1v41b\_ d1rd11\_ d2msba\_ d1pfsa\_  
d2a1ka\_ d1je5a\_ d1rpma\_ d2shpa1 d1yfoa\_ d118ka\_ d2ooqa1 d1g4us2  
d1p15a\_ d1lara2 d1lara1 d1wcha\_ d2fh7a2 d2fh7a1 d3azya\_ d3wvja\_  
d1upsa1 d1ajoa\_ d2hyka\_ d1ajka\_ d2vy0a\_ d1o4ya\_ d3o5sa\_ d3d6ea\_  
d3atga\_ d1dypa\_ d1umza\_ d3i4ia\_ d1tdha3 d1q3ba3 d1ee8a3 d1k82a3  
g1qmo.1 g1len.1 d3zyra\_ d1fnya\_ d1n47a\_ g21tn.1 d1avba\_ d3usua\_  
d1dhkb\_ d1f9ka\_ d1lukga\_ d1g8wa\_ d1g9fa\_ d3wcsa\_ d1g7ya\_ g1loe.1  
d1mvqa\_ d1hq1a\_ d1v6ia\_ d1dbna\_ d1qnwa\_ d1fx5a\_ d4l8qa\_ d1ioaa\_  
d3n35a\_ d3ubra\_ d1d4ca1 d2k3va\_ d1ft5a\_ d1qdba\_ d1m1qa\_ d2j7aa\_  
d1h21a\_ d1ogyb\_ d4fasa\_ d1jnia\_ d1oaha\_ d1sp3a\_ d3h33a\_ d1rwja\_  
d19hca\_ d1os6a\_ d3bxua\_ d3h4na\_ d1i77a\_ d3caoa\_ d1j0pa\_ d2ctha\_  
d1duwa\_ d1ofwa\_ d2e84a\_ d1hh5a\_ d1gyoa\_ d3h34a\_ d1dszb\_ d1a6ya\_  
d3cbba\_ d1ynwa1 d1r4ia\_ d1hcqa\_ d2hana\_ d2hanb\_ d2enva1 d1kb4b\_  
d2n11b\_ d1lo1a\_ d1cita\_ d1adqa1 d1fnga1 d1uvqb1 d1zs8a1 d2vola1  
d2vola2 d1mfb12 d2jelh2 d1uwel2 d3qq4b1 d1kjvb\_ d1k5na1 d1osph2  
d4odh12 d1ow0a1 d1ow0a2 d1bfob2 d3l9ra2 d3jtth1 d2fath2 d4elkb2  
d1fn4b2 d2xfxb\_ d1pg7x2 d1cqka\_ d4k71b2 d11k2a1 d1eapb2 d41fhg2  
d1i4fa1 d2nw2a2 d1kfah2 d1mhca1 d1h3ua1 d1wejh2 d1h0db2 d1a5fh2  
d1kcvh2 d1mjuh2 d1qqda1 d1kcrh2 d1k8ia1 d3huja2 d2nnab1 d1nfd2  
d3mffb2 d1s9va1 d11k3h2 d1q0x12 d1fv1b1 d1neza1 d4rfeb2 d1r3ha1

d1a6tb2 d1kjva1 d1pz5b2 d1onqa1 d2bc4a2 d1de4a1 d1k8da1 d1tcra2  
d1dn0b2 d1nfde2 d2xwtb2 d1bfoa2 d1mexh2 d1iakb1 d1ypzf2 d4f7ea2  
d1q72l2 d2fbjh2 d1fe8h2 d1clzh2 d1fngb1 d1uvqa1 d1vgka1 d1c16a1  
d4j12a2 d4x99b2 d1igtb3 d1je6a1 d1q72h2 d1nldh2 d1teth2 d2hmic2  
d1ilca2 d1ilca1 d1k8ib1 d1q0yh2 d1kfa12 d3frua1 d1pg7w2 d1u58a1  
d1igyb4 d1igyb3 d1hyrc1 d1klub1 d1deeb2 d1c12b2 d2bc4b2 d2ig2h2  
d1kcv12 d3wn5b1 d1lk2b\_ d1lk3l2 d1mjul2 d1sm3h2 d1q0xh2 d1zvsal  
d1ydpal d1u8ib2 d1ypze2 d1kcuh2 d1op9a\_ d1y0la1 d1letzb1 d1egj11  
d2gsib1 d1nj9a1 d4jfhdl d1aqk11 d1t2ja\_ d1lo4h1 d1zvya1 d3v4v11  
d4enec1 d1kxtb\_ d5e8ea1 d2pxya\_ d4weud\_ d1xiwc\_ d2esvd1 d1qznh\_  
d1ogae1 d1f4xh1 d4n1hb\_ d3ezjb1 d3mlw11 d1kfah1 d1letza1 d1b4jh1  
d3cfic\_ d4w68a\_ d2arja1 d1ek3a\_ d2ok011 d1vera\_ d1uwgh1 d1blnb1  
d1fpth1 d1rzga1 d2giya1 d4m3kb1 d1nc2a1 d2nyyd1 d1ncna\_ d1fbih1  
d5dxwa\_ d4fqqa1 d1dqdh1 d1jfq11 d1kelh1 d1faih1 d1frgl1 d1fig11  
d4m6n11 d1fo0a\_ d4hxb11 d3b5ga\_ d3quyd1 d2h9gb1 d1i8kb\_ d2dd8h1  
d2ck0h1 d1eaja\_ d4w6wb1 d2a6ib3 d1t66d1 d2e27h\_ d1ob1b1 d1f11b1  
d2v7na1 d1ad0a1 d2xt1b1 d1pskh1 d4i13b1 d2op411 d1a0q11 d1luwel1  
d1za3a1 d1ncb11 d4uu9a\_ d1bm3h1 d1cloh1 d1nqba2 d1cf8h1 d4y5va\_  
d1mhph1 d5anma1 d4cdgc1 d4ldeb\_ d1y0lb1 d2pcpb1 d1z3gl1 d1dfb11  
d1fh5h1 d3g5xa1 d1tzib1 d4dn3l1 d3zhka1 d2b1hh1 d2uylal d1f3dh1  
d1nj9b1 d2agjh1 d2h1pl1 d1q72h1 d8fabb1 d1ndmb1 d1rjca1 d4u6hb1  
d3upca\_ d2fbj11 d1osph1 d1tvda\_ d2cjev\_ d4fhbd1 d1bd2d1 d1rz7h1  
d3nn8a\_ d1blna1 d1knoa1 d1nfda1 d2bmkb1 d1dq11\_ d1igyb1 d1igf11  
d12e8h1 d3utza1 d1nc2b1 d1rihh1 d4mwfb1 d4jvpa1 d1mieh1 d1rhfa1  
d1fgn11 d1sbsh1 d1lp9e1 d1dn0a1 d4lqf11 d1iaih1 d1kgcd1 d1mh5b1  
d1gpol1 d2g60h3 d1f8t11 d2jixd1 d4grwh\_ d1fo0b\_ d1bfob1 d1axsa1  
d1u9ka\_ d1nmbh\_ d1h8na1 d1h8na2 d1jguh1 d4eural d3sdy11 d35c8h1  
d1w72l1 d1mvub\_ d1i9rh1 d1ob1a1 d4wenb\_ d1yeeh1 d3ietc1 d1f58h1  
d1ad0b1 d1mqk1\_ d1nbvh1 d4b50a\_ d3r8bb\_ d1baf11 d1mamh1 d4rgne1  
d2gsgb\_ d35c8l1 d1bafh1 d1ai1h1 d2pcpa1 d2fath1 d2x1pa\_ d1orsb1  
d1ibgl1 d1shma\_ d1a2yb\_ d1u0qa\_ d2coqa\_ d1hilb1 d1qfwi\_ d1jv5b\_  
d1fn4b1 d5e0qa\_ d1nsnh1 d1plgl1 d4ocx11 d1kb5h1 d1rzfh1 d1pg7x1  
d2fx7h1 d2oi9c\_ d1l7i11 d3eyva1 d1d5i11 d4ffyl\_ d1a6wh\_ d1ac6a\_  
d3dvfa\_ d1nfde1 d1mimh1 d1ri8a1 d1jhlh\_ d3dura\_ d1fskb1 d1f97a1  
d3so3b1 d2ak4d1 d1lp9f1 d4z7wf1 d1l7th1 d4y5ya\_ d4x7ec1 d1emth1  
d1ikf11 d1nlbh1 d4utal1 d1bjma1 d1eapb1 d1u6ah1 d2dtgd1 d1kj2b\_  
d1xeda1 d1c1eh1 d1fgvh\_ d2bnub1 d2fb4h1 d2dtgb1 d1ktrh\_ d1jpth1  
d1qkz11 d4hepg\_ d2atpb1 d1flrh1 d2hrpl1 d1mvfa\_ d1iaim1 d3k80a1  
d2jb5h1 d3zkxc\_ d4grwe\_ d1it9h1 d1rhhb1 d3w9ec\_ d1e4wh1 d1sy6h1  
d2j6eh1 d3qxta\_ d1jglh1 d1p7ka1 d1tzhb1 d4n8pa1 d1gaf11 d2jelh1  
d1wioa2 d4i0cc1 d1cicb1 d1lmka2 d1lmka1 d1iqwh1 d1lorqb1 d1ejoh1  
d1jnlh1 d4zg1a\_ d43c9b\_ d1ggbl1 d1wejh1 d3q6fa1 d1f3dj1 d3c6la1  
d1bqlh1 d3p9wb\_ d1a3r11 d1h0db1 d2uzil\_ d1eo8l1 d1qfwl\_ d1n7ml1  
d1igja1 d1c5ch1 d2a9mh\_ d1rmfh1 d1fj1b1 d4heme\_ d1ccza1 d1a5fh1

dlogad1 d1dlfh\_ d1qa9b\_ d1vge11 d3qskb\_ d1sjxa\_ d4ozfg1 d1sq2n\_  
d1qd0a\_ d1kcvh1 d1c5db1 d3qcull d8faba1 d3bn9d1 d1mjuh1 d4y8dc\_  
d7fabh1 d3dvgb1 d11o011 d1a6tb1 d1gigh1 d1kcrh1 d2hwz11 d1yjdc1  
d3clfl1 d4krna\_ d1dl71\_ d1e6o11 d1mexh1 d3r0ma\_ d4kkna\_ d1fns11  
d1oaqh\_ d1rzia1 d1ucbh1 d1ncw11 d4b41a\_ d1nfd1 d2mpah1 d2d7t11  
d4grwf\_ d4b5ea\_ d11k3h1 d3u79a\_ d4u3xa\_ d1ghf11 d1bvkb\_ d1mcww1  
d1b88a\_ d1jrhh1 d32c2b1 d4wemb\_ d1dsfh\_ d1op3h1 d1cell1 d1liqda1  
d1qoka1 d1qoka2 d1qfuh1 d2crya1 d1ay1h1 d1oaq1\_ d3ab0b\_ d1rur11  
d1t4kb1 d1bz7b1 d1n0xh1 d1for11 d1ucbl1 d4w6yb\_ d43c9a\_ d2aab11  
d1tzia1 d4n1ca\_ d1k6qh1 d3g9ab\_ d4tvsa1 d1igmh\_ d1pz5b1 d3dx9a1  
d3wxwh\_ d1nakh1 d1kcul1 d3eaka\_ d4qlra1 d1cr911 d1d9ka\_ d1f4x11  
d1deea1 d2i27n2 d1c12a1 d2orb11 d1j8hd1 d1mcph1 d1c5da1 d1kenh1  
d1bd2e1 d1h5ba\_ d4x7fc1 d3upaa\_ d1t3fa1 d1indh1 d2dtgc1 d4hc111  
d1zv5a1 d4wgvb\_ d1uwg11 d4f37k1 d1aqkh1 d1vesa\_ d3zkqd\_ d1fpt11  
d11o411 d1knob1 d3rrqa\_ d1ct8b1 d4orz\_ d1mlbb1 d4hgkc1 d1dqd11  
d1bogb1 d4ozhe1 d1dr9a1 d1i7za1 d1dn0b1 d1kell1 d1rrib1 d1ypzf1  
d1wtla\_ d1hkfa\_ d1fail1 d1figh1 d2vyre\_ d1sjva\_ d1ohqa\_ d1bfoa1  
d1pkqb1 d1mjul1 d1b4j11 d1nsn11 d2arjb1 d1p4bh\_ d4aj0a\_ d3nn8b\_  
d2rcja1 d1f2xk\_ d4v1dd\_ d1adqh1 d2eksa\_ d4k3ga\_ d1jfqh1 d1uweh1  
d1frgh1 d4gftb\_ d1uz8b1 d4n1ea\_ d1bm311 d1clo11 d3mcka1 d2vq1a1  
d1ae6h1 d4aq1b1 d1uj3b1 d1nbqa1 d1fh511 d2ck011 d2ywza\_ d1q7211  
d4nxbx\_ d1hila1 d4hz1b1 d2j8811 d1zmya1 d1cd0a\_ d1a4ka1 d1psk11  
d1a0qh1 d4krmb\_ d1ncbh1 d2fbjh1 d1j8he1 d1i3ua\_ d1cf811 d1fe8h1  
d2p1ya1 d1eeqa\_ d2x89a\_ d1o10a\_ d2r01h1 d1ub5a1 d1dfbh1 d3eyvb1  
d4jdvb1 d4p2cg\_ d2gsia1 d2agj11 d1u3ha1 d2h1ph1 d1rih11 d1fskc1  
d1boga1 d2a7711 d1osp11 d1qfoa\_ d3dwta\_ d2fx711 d1rz711 d3stba1  
d1pkqa1 d1b6da1 d1dzba2 d1dzba1 d1kj2a\_ d411ha\_ d1rzgb1 d1dq1h\_  
d12e811 d1miel1 d1jmaa\_ d1sbs11 d1fgnh1 d1f5811 d1mqkh\_ d1ndgb1  
d3qeg11 d1ia11 d2aw2a1 d1tqbc1 d3fo2a1 d4dkaa\_ d1f8th1 d2g6011  
d2ywy\_ d1uj3a1 d1yc7a\_ d3bd3a\_ d4w6xb1 d1nmb1\_ d1i8ka\_ d1rj1b1  
d1ypze1 d1p7kb1 d1kxqe\_ d1gpoh1 d2z4qa1 d1w72h1 d1i9r11 d4qgya1  
d4xt1c\_ d2qqnh1 d1cica1 d3c08h1 d2cd0a\_ d2bdnh1 d1hnga1 d1mam11  
d1nldh1 d1cr9h1 d41cih1 d3bkyh1 d3qg711 d1ai111 d1kxvc\_ d4iosd\_  
d117ih1 d2x1qa\_ d1ub6b1 d3k74b\_ d1ibgh1 d1teth1 d1igya1 d1hxma1  
d2x6ma\_ d2e71a\_ d5e03a\_ d1qfwm\_ d2r0kh1 d1igjb1 d1rurh1 d1plgh1  
d1mj8h1 d1yuhb1 d3fmg11 d1rzf11 d1emt11 d1ad9b1 d1igtb1 d1nlb11  
d1d5ih1 d3k7ua\_ d4ffyh\_ d1bwwa\_ d3dvga1 d1a6ta1 d1fgvl\_ d4qxgl1  
d1mim11 d1jh11\_ d2hffb1 d2hh011 d1qkzh1 d117t11 d1afvh1 d1iaii1  
d2cjuh\_ d1um5h1 d2ghwb2 d2ghwb1 d1kgce1 d2fgwh1 d1ikfh1 d1dvfd\_  
d2i24n1 d2xtjb\_ d1za3b1 d2yc1a\_ d2hh0h1 d2x1oa\_ d1bvka\_ d1rj1a1  
d5e7ba1 d1igta1 d1i11b1 d2fb411 d1mvua\_ d1jpt11 d32c2a1 d1fvca\_  
d1iqdb1 d2hrph1 d2p4ab\_ d4qo1a\_ d1p2cb1 d1wt5c\_ d1t4ka1 d5c1mb\_  
d1it911 d1bz7a1 d1b2wh1 d1e4w11 d1jnl11 d1yedb1 d1za6b1 d3u7aa\_  
d1igfh1 d3gnm11 d1orsa1 d1wejl1 d1a2ya\_ d1hxmb1 d1gafh1 d2j4wh1

d1pz5a1 d1j05a\_ d1a3rh1 d4fq1l1 d1qfwh\_ d1eo8h1 d1n7mh1 d4s11a\_  
d1kegh1 d5da4a\_ d1iqwl1 d3whxb1 d1vgeh1 d1deeb1 d1c12b1 d1t2ql1  
d1ad9a1 d3gsnb1 d3b2uc1 d1ggbh1 d1t3fb1 d1nakl1 d4ocmc\_ d1lila1  
d2v7hb3 d2esve1 d1mcoh1 d2qr0b1 d2q3aa\_ d1ct8a1 d1kcr11 d2pxyb\_  
d2uzih\_ d5c3ld\_ d3durb\_ d1c5c11 d2ak4e1 d1dl7h\_ d1xiwd\_ d1mlba1  
d1rmfl1 d1i7zb1 d1dlfl\_ d2xa3a\_ d5bq7b1 d1dqqb1 d3h4211 d1egjh1  
d1kcv11 d1fe8l1 d2j6e11 d1f3rb2 d1lk311 d1sm3h1 d1q0xh1 d1ghfh1  
d7fab11 d1igch1 d1lo0h1 d4idla\_ d5c2b1\_ d1jrh11 d1l11a1 d3zhda1  
d4kfzc\_ d1b0wa\_ d1e6oh1 d1mex11 d4krpb\_ d1fnsh1 d1ncwh1 d4hgma\_  
d4eigb1 d4rzca\_ d2mpa11 d4y5xa\_ d5en2b1 d3lrqa1 d4ej1c1 d1rhha1  
d1j05b\_ d1forh1 d1q9wb1 d2wzpd\_ d2aq2a1 d1h0da1 d3revb1 d2ij0c1  
d1tzha1 d4m7j11 d1k6q11 d3b9kc1 d1igml\_ d3qeua1 d1dsfl\_ d1celh1  
d1kcu11 d1zvha1 d1zvoa1 d1tqbb1 d1ay111 d2qsc11 d2cgrh1 d1n10h1  
d1ken11 d3eo0a1 d4n9ob1 d1n0x11 d3k1kc\_ d2m9wa1 d3dfxa\_ d2aq2b1  
d1ck1a1 d1enfa1 d1i4pa1 d1v1oa1 d1et9a1 d1esfa1 d2g9hd1 d4ohja1  
d1klud1 d1bxta1 d1ty0a1 d1fnua1 d2qaln1 d2cqva1 d1fhga\_ d2k1ma\_  
d2d12a1 d1biha3 d1biha1 d1biha4 d3qp3a1 d1g1ca\_ d1gxea\_ d1cvsc2  
d1cvsc1 d1xmwa2 d1m4ka2 d2otpa2 d1biha2 d1rhfa2 d2fcba2 d2fcba1  
d1wwbx\_ d1gsma2 d1epfa1 d1epfa2 d2dava1 d1waaa\_ d1f97a2 d1x44a1  
d1vcaa2 d1fnla2 d1fnla1 d3b5ha2 d3h8na2 d3h8na1 d1jbja1 d1jbja2  
d1pd6a\_ d1f2qa2 d1f2qa1 d3cx2a\_ d1nbqa2 d3b5ha1 d1n26a1 d1xiwb\_  
d1xaua\_ d1fltx\_ d2ifga1 d1olla1 d1olla2 d1cs6a4 d1cs6a3 d1cs6a2  
d1cs6a1 d2gw5a2 d1sy6a1 d1xiwa\_ d1lucta2 d1lucta1 d1ry7b2 d1gl4b\_  
d1qz1a3 d1olza1 d2c9aa1 d1wwca\_

**Family-95 (g.3.6.1)**

**Positive dataset contains 1 protein sequences.**

d1rmka\_

**Negative dataset contains 4099 protein sequences.**

d1m32a\_ d1libja\_ d1c7na\_ d1iuga\_ d4q75a\_ d2bkwa1 d1t3ia\_ d1n8pa\_  
d1qz9a\_ d1jff9a\_ d1eg5a\_ d1p3wa\_ d3kgwa\_ d1cl1a\_ d2ctza1 d1vjoa\_  
d2rfva\_ d1cs1a\_ d1d2fa\_ d2ch1a1 d1qgna\_ d1pffa\_ d1elua\_ d1ax4a\_  
d1c7ga\_ d2v1pa1 d2ez1a\_ d1u08a\_ d1lc5a\_ d1b5pa\_ d2ay1a\_ d1bw0a\_  
d3pd6a\_ d7aata\_ d2csta\_ d1j32a\_ d1fg7a\_ d4wlha\_ d1o4sa\_ d1v2da\_  
d1gdea\_ d1m6sa\_ d1v72a1 d1svva\_ d1ajsa\_ d1wsta1 d2f8ja2 d1lk9a\_  
d1vp4a1 d1xi9a1 d2gb3a1 d2bnma2 d1jx4a2 d3gv5b1 d1t94a2 d3bq0a2  
d3i2ka1 d1lnsa3 d1mpxa2 d2cfba1 d1o69a\_ d1bj4a\_ d3k28a\_ d2bwpa\_  
d3lg0a\_ d2fnua\_ d3ou5a\_ d1z7da1 d1b9ha\_ d1iaya\_ d4msoa\_ d1bs0a\_  
d1s0aa\_ d1sffa\_ d3tqxa\_ d1mdoa\_ d3qboa\_ d3pgya\_ d1bjna\_ d2dkja\_  
d1ejia\_ d1vefa1 d4wxga\_ d3bs8a\_ d3gbxa1 d1w23a\_ d2b5aa1 d2ofya1  
d4mcxa\_ d2xi8a\_ d2icta\_ d2bnma1 d2ppxa1 d1y7ya1 d1sefa\_ d1sfna\_  
d1rc6a\_ d1m8pa3 d1f56a\_ d1bypa\_ d1azca\_ d1ws8a\_ d3u25a\_ d1cuoa\_  
d1id2a\_ d1rkra\_ d2iaac\_ d4dp1x\_ d1nwpa\_ d2gima\_ d2i7sa\_ d1qhqa\_  
d3ehbb1 d1fftb1 d1gyca3 d1hfua2 d1kbva1 d1kbva2 d1sdda1 d1sdda2  
d1gyca1 d1gyca2 d1mzya1 d2bw4a1 d1aoza1 d1aoza3 d1aoza2 d1kyaa3

d1kyaa1 d1mzya2 d4e9sa1 d1sddb1 d1sddb2 d1hfua1 d1hfua3 d1oe1a2  
d1oe1a1 d1v10a2 d1v10a3 d1v10a1 g1f8v.1 d1novc\_ d2bema\_ d1pama1  
d1lea9c1 d1qhoa1 d2fhfa2 d2fhfa1 d1k3ia1 d1j0ha1 d1cxla1 d2bhua1  
d1ledqa1 d1f1sa2 d1ut9a2 d1gvia1 d1txka1 d4alac\_ d1pjwa\_ d1rera1  
d1s6na\_ d3uzqb\_ d2phla2 d2phla1 d1fxza2 d1fxza1 d1lrha\_ d1uija1  
g1dgw.1 d2v09a\_ d1uika2 d1uika1 d1dgwa\_ d1ep0a\_ d2pa7a1 d1wlta1  
d2c0za1 d1ds6b\_ d1fstb\_ d1g0da1 d1eixa\_ d3exra\_ d2ffca1 d2fdsa1  
d3n3ma1 d2czda\_ d1q6oa\_ d2yyua\_ d1vqta1 d1dbta\_ d3ldva1 d2bjca1  
d2hsga1 d1qpza1 d1mqta\_ d1d4m3\_ d1fmd3\_ d2mev1\_ g1aym.1 d1ev13\_  
d4q4w1\_ d1r1a3\_ d2x5ia\_ d1rhi1\_ g1r1a.1 g1d4m.1 g1rhi.1 d1b35b\_  
d1loopa\_ d1tme1\_ d4iv1a\_ g1pvc.1 g1fpn.1 d1fpn1\_ d4gb31\_ d1d4m1\_  
d1fmd1\_ d1ev11\_ d2wzr3\_ g1cov.1 d1qqp3\_ g1fmd.1 d2x5ic\_ d1rhi3\_  
g1oop.1 d1hxs1\_ g1hxs.1 d1fpn3\_ d1bev1\_ g2mev.1 d1eah3\_ d1aym1\_  
d1pvc3\_ d1zba3\_ d1h8ta\_ d3vbhc\_ g1b35.1 g1bev.1 d1hxs3\_ g1ev1.1  
d1bev3\_ g1tmf.1 d1tmf1\_ d1b35a\_ d2mev3\_ g1eah.1 g1h8t.1 d1eah1\_  
d4q4w3\_ d1r1a1\_ d1aym3\_ d1pvc1\_ d1zba1\_ d1h8tc\_ d1loopc\_ d1tme3\_  
g1qqp.1 d4iv1c\_ g1tme.1 d1r0ka3 d1vkoa2 d1vm6a2 d3qvsa2 d1gr0a2  
d1p1ja2 d3gpdg2 d2q49a2 d1hdgo2 d2g17a2 d2cvoa2 d2czca1 d3pwka2  
d1obfo2 d1i32a2 d1zyao2 d2pkqo2 d1b7go2 d2hjsa2 d1cf2o2 d1vkna2  
d1nvm2 d1ux8a\_ d1dlya\_ d4i0va\_ d2bkma\_ d2bmma\_ d2msya\_ d2djoa1  
d2r5za\_ d1au7a1 d1f43a\_ d2lmda1 d1akhb\_ d1s7ea1 d3nara\_ d1zq3p1  
d2craa1 d1mija\_ d4uuta\_ d3a01a\_ d1x58a1 d3rkqa1 d3cmya1 d2cqxa1  
d2da6a1 d1e3oc1 d1fjla\_ d1mh3a1 d1ig7a\_ d1x41a1 d1wh7a1 d1gt0c1  
d2mw8a\_ d1lfup\_ d1x2ma1 d1b72a\_ d1wi3a1 d1jgga\_ d1wjha1 d1x2na1  
d1mnm2 d2cuea1 d3k2aa\_ d2hosa\_ d2jwta2 d1pufa\_ d1oact1 d2hi3a\_  
d1b8ia\_ d4j19a\_ d3lnqa\_ d1wh5a1 d1b8ib\_ d1fexa\_ d2cqra1 d1guua\_  
d1ug2a1 d2cqqa1 d2ajea1 d4a69c\_ d1h8ac1 d2crga1 d2iw5b1 d1xc5a1  
d1ofcx1 d2cu7a1 d1wgxa1 d2cjja1 d2ckxa1 d1gvda\_ d1hcra\_ d1tc3c\_  
d1gdta1 d1u78a2 d1xg1a1 d1itya\_ d1hlva1 d1hlva2 d1iufa2 d1iufa1  
d2iu5a1 d1zk8a1 d2g7sa1 d2fd5a1 d2np5a1 d1z0xa1 d2id6a1 d2d6ya1  
d2i10a1 d1vi0a1 d2oi8a1 d3c07a1 d2ns7a1 d2fq4a1 d2yvea1 d1t33a1  
d2o7ta1 d1rkta1 d2np3b1 d2g7ga1 d2gena1 d2fbqa1 d2g7la1 d2gfna1  
d2g3ba1 d2jj7a1 d2hyja1 d1sgma1 d1ui5a1 d2hkua1 d2id3a1 d4jyka1  
d1b10a1 d1b10a2 d1d5ya1 d1prt2 d3lv8a\_ d1s3ga1 d1zaka1 d1s4qa\_  
d3tvta2 d1uf9a\_ d1khta\_ d1ckea\_ d1osna\_ d1p5zb\_ d4tmka\_ d3cm0a\_  
d1tmka\_ d1jaga\_ d3h86a\_ d1t0hb\_ d1nn5a\_ d2h92a\_ d3kb2a1 d2c95a1  
d1yj5a2 d1kgda\_ d1ly1a\_ d2ak3a1 d1vyva2 d1deka\_ d2grja1 d1p3ja1  
d1y63a\_ d1e4ya1 d1s96a\_ d3iija1 d1lvga\_ d1nksa\_ d1vyua2 d4e22a\_  
d1qf9a\_ d1jjva\_ d1q3ta\_ d1ki9a\_ d1lw7a2 d1teva\_ d1kja2 d1gsia\_  
d1x6va3 d1g3ma\_ d1j99a\_ d1t8ta1 d1fmja\_ d1zrha\_ d1ls6a\_ d2a3ra\_  
d1aqua\_ d2zptx\_ d3ckla\_ d1texa\_ d1q44a\_ d2gwaha\_ d1uj2a\_ d4gi7a\_  
d2jeoa1 d1rz3a\_ d1z0ja1 d3umra2 d3gj0a1 d2gaoa1 d1yzga1 d1x3sa1  
d1g7sa4 d1puja\_ d1udxa2 d1kk1a3 d2o52a\_ d1jwyb\_ d1zcaa2 d1zcba2  
d2fv8a1 d2cjwa\_ d3dz8a1 d1xzpa2 d1vg8a\_ d4qxaa\_ d2ew1a1 d1x1ra1

d2bcgy\_ d3doea1 d3cona\_ d3rega\_ d3wyga\_ d1upta\_ d2b6ha1 d1zd9a1  
d1lnza2 d1r5ba3 d1n0ua2 d1r2qa\_ d2f9la1 d2rhda\_ d3q3jb\_ d3q85a\_  
d1efma1 d1r8qa\_ d2gf9a1 d2akab1 d1lek0a\_ d1z08a1 d2gcoa1 d2dy1a2  
d4g01b\_ d2cxxa1 d1svia\_ d3q72a\_ d1ni3a1 d4ac9a4 d2erxa1 d2bmea\_  
d1wxqa1 d2gf0a1 d41dja1 d1zunb3 d1d5ca\_ d4lv5b\_ d1efca3 d1kmqa\_  
d2g6ba1 d3lrpa\_ d1tada2 d2y8ea\_ d4rd4a1 d1z06a1 d2heia\_ d3a58b\_  
d1u0la2 d1d2ea3 d1zj6a1 d2ocba\_ d3rwoa\_ d1mr3f\_ d2e9sa1 d4u5xa1  
d2iwra\_ d2fn4a1 d3bwdd\_ d2nzja1 d2atva1 d2ksqa\_ d3l43a\_ d1mkya2  
d1mkya1 d1wmsa\_ d1jnua3 d2rmka\_ d1f6ba\_ d1f60a3 d1gota2 d1jala1  
d2fh5b1 d1g16a\_ d2wblc\_ d1m7ba\_ d1wf3a1 d1f5na2 d1t9ha2 d1z6xa1  
d1z0aa1 d2fg5a1 d2a5ja1 d2bcjq2 d1s0ua3 d1ky3a\_ d4y0va\_ d4lhwa\_  
d2qmea1 d2atxa1 d1legaa1 d1ryha\_ d1moza\_ d1nrjb\_ d2erya1 d3bfka\_  
d1puia\_ d1fzqa\_ d3j3az1 d3t5ga\_ d1shza2 d3defa\_ d2f7sa1 d3raba\_  
d3tsoa\_ d3aq4a\_ d2a17a1 d3sfva1 d3bc1a\_ d2ncda\_ d1sdma\_ d3h4sa1  
d2heha\_ d2grya\_ g3kin.1 d1br2a2 d1goja\_ d1f9va\_ d2mysa2 d1lkxa\_  
d3t0qa\_ d4db1a1 d3gbja\_ d1ry6a\_ d1v8ka\_ d1vava\_ d1luaia\_ d1k8ka2  
d1k8ka1 d3uleb1 d3i33a2 d3i33a1 d1bupa1 d1dkgd2 d1dkgd1 d4ci6a2  
d1jcfal d4a2ba2 d2fxua1 d1yaga2 d1yaga1 d4cbua2 d1bupa2 d3vrda1  
d3vrda2 d1fcdc2 d1fcdc1 d1h1oa2 d1h1oa1 d1m70a1 d1iqca2 d1iqca1  
d1eb7a2 d1nmla2 d1nmla1 d3h1jd1 d1hroa\_ d4gedb\_ d3zooa\_ d1mz4a\_  
d1gu2a\_ d1f1fa\_ d1dvva\_ d1c6ra\_ d1c75a\_ d1e29a\_ d1gdva\_ d1cnoa\_  
d1h32b\_ d2bh4x\_ d2aiua\_ d5cytr\_ d1jdl\_ d1i8oa\_ d2zboa\_ d3dmia\_  
d1ls9a\_ d1wvec\_ d2yk3a\_ d3ph2b\_ d1dw0a\_ d5aura\_ d1ql3a\_ d1qn2a\_  
d1f1ca\_ d2nqya\_ d1h4ga\_ d1hixa\_ d1oa2a\_ d1olra\_ d3b7ma\_ d4h7ma1  
d3wp3a\_ d2vgda\_ d1ligoa\_ d3zsea\_ d2nlra\_ d3wx5a\_ d1oa3a\_ d1pvxa\_  
d1f5ja\_ d1oa4a\_ d1ks5a\_ d4ix1a1 d1evsa\_ d1cnt1\_ d1pvhb\_ d1z7ca\_  
d1huwa\_ d1bgea\_ d1rhga\_ d1f6fa\_ d1f45b\_ d1axia\_ d1letea\_ d3tgxb\_  
d1scfa\_ d2z3qa1 d3qb1a\_ d1hula\_ d1m48a\_ d4nkqb\_ d1eera\_ d1v7mv\_  
d5e4ea\_ d2o27a\_ d3b5ka\_ d2psma1 d4zf7a\_ d3uf5a\_ d4x51a\_ d4ypgc1  
d3oq3a\_ d1lqsl\_ d1n1fa\_ d1aula\_ d1wu3i\_ d3bes1\_ d3ux9a\_ d4dnxa2  
d1v47a2 d1g8fa2 d1jhda2 d1x6va2 d3rbaa\_ d2qtra\_ d1nupa\_ d3l92a\_  
d1qjca\_ d2h29a\_ d1vlha\_ d1od6a\_ d1lw7a1 d1mrza2 d4ruka\_ d2e17a\_  
d1iq0a2 d1irxa2 d1r6ta2 d1livsa4 d2cyba\_ d1rqga2 d1j09a2 d2yxna\_  
d1f7ua2 d1ffya3 d2g36a1 d1nzja\_ d1jila\_ d1n3la\_ d1i6la\_ d1pfva2  
d1h3na3 d3n9ia\_ d3sz3a1 d3sw2a\_ d1moxc\_ d1dx5i3 d1edmb\_ d1autl2  
d1autl1 d1nqlb\_ d1dval1 d1szba2 d1kigl\_ d2y5fl\_ d1ijqa2 d1gk5a\_  
d1g1sa2 d1nt0a3 d1xdtr\_ d1lmja2 d1lmja1 d1nzia2 d2wphe\_ d1klil\_  
d1pfxl2 d1p9ja\_ d1g1ta2 d1f7ea\_ d4yzub\_ d2mgpa1 d1b9wa2 d2mgpa2  
d1oblcl d1oblcl2 d1n1ia2 d1n1ia1 d2npra2 d2npra1 d1qx2a\_ d2y5ia\_  
d1qlsa\_ d1psra\_ d3n22a\_ d2egda\_ d4ggfc\_ d2wcea\_ d2luca\_ d4aqia\_  
d3nsia\_ d2lp3a\_ d1j55a\_ d1a4pa\_ d1k8ua\_ d1nsha\_ d1pvaa\_ d3fs7a\_  
d2pvba\_ d1ttxa\_ d1rwya\_ d2kyfa\_ d1rk9a\_ d1a75a\_ d1lexra\_ d1tiza1  
d1nyaa\_ d1g8ia\_ d1ggwa\_ d1wdcc\_ d3fwba\_ d1ggza\_ d2o5ga\_ d1ctaa\_  
d1m45a\_ d3i5gc\_ d1s18a\_ d1fpwa\_ d2scpa\_ d2roaa\_ d4aqra\_ d3pn7b\_



d1br1b\_ d2mysb\_ d1s6ca\_ d1bjfa\_ d2obha\_ d1jfka\_ d1jf0a\_ d1qv0a\_  
d1lkja\_ d2mlfc\_ d2m97a\_ d2d8na\_ d4by5a\_ d1jbaa\_ d4nqga\_ d1wdcb\_  
d2mysc\_ d1j7qa\_ d1s6ia\_ d1uhka2 d1r2ua\_ d1dtla\_ d3kf9a\_ d3pn7c\_  
d1qjta\_ d1c07a\_ d5d67d\_ d1tuza\_ d1leg3a1 d1leg3a2 d2zkmx1 d1snla\_  
d1gjya\_ d1y1xa\_ d1hqva\_ d1dvia\_ d1df0a1 d1qxp2 d4usla\_ d1wkya2  
d1uuqa\_ d3wh9a\_ d4m1ra\_ d1xyza\_ d4xuya\_ d2je8a5 d4bf7a1 d3cuia\_  
d1ur4a\_ d1qw9a2 d1odza\_ d2vzsa5 d1bqca\_ d2x2ya1 d1hjqa\_ d1qnra\_  
d4y7ea1 d1vjza\_ d4k68a\_ d2v3ga\_ d4hpga\_ d1nofa2 d1nq6a\_ d1h4pa\_  
d1aq0a\_ d3ziza\_ d4bs0a\_ d1lecea\_ d1h1na\_ d1ta3b\_ d1w91a2 d1ilwa\_  
d1us3a2 d1egza\_ d7a3ha\_ d1tvna1 d3nyda1 d1ghsa\_ d2cyga1 d4xv0a\_  
d2c8na2 d1w32a\_ d3emca\_ d1v6ya1 d1foba\_ d2uwfa1 d2fgla\_ d3niya1  
d2c0ha1 d1rh9a1 d1yq2a5 d1szna2 d1fa2a\_ d1pama4 d5do8a1 d1ea9c3  
d1hx0a2 d2fhfa5 d1qhoa4 d1avaa2 d1m53a2 d4m8ua1 d2gjpa2 d1lwha2  
d4howa1 d1ktba2 d1j0ha3 d3vm5a1 d2x1ia\_ d1wzaa2 d1uasa2 d2diea1  
d1mxga2 d1ht6a2 d1eswa\_ d1iv8a2 d5cpsa\_ d1ud2a2 d1zjaa1 d3gbea1  
d1kwga2 d1wdpa\_ d1gcya2 d1g5aa2 d1hvxa2 d3dhp2 d2bhua3 d4do4a1  
d3qgva1 d1e43a2 d1g94a2 d2d3na2 d1gjwa2 d1gvia3 d1x1na1 d1r7aa2  
d1tz7a1 d4toqa\_ d1wb0a1 d1w9pa1 d1eoka\_ d1itxa1 d1kfw1 d1ledqa2  
d2gsja\_ d1hjxa1 d1jnda1 d1vf8a1 d3wdpp1 d3wq5a\_ d1gnxa\_ d4gxpa\_  
d4hz8a\_ d1e4mm\_ d3aiua\_ d1wcga1 d1qvba\_ d3ahxa\_ d1v02a\_ d2dgaa\_  
d1pbga\_ d1vffa1 d1qoxa\_ d4ha4a\_ d1mixa2 d1e5wa2 d1j19a2 d1isna2  
d2a16b2 d3syxa1 d1mkea1 d2p8va\_ d1xoda1 d1evha\_ d1qc6a\_ d1legxa\_  
d1x14a1 d3vsqa\_ d2gixa1 d1p7ba1 d1liuka\_ d2csua1 d3q9ub\_ d2yv1a1  
d3q9na\_ d2d59a\_ d2yv2a1 d1euca1 d1y81a1 d1wgqa1 d1v89a1 d2coda1  
d1zc3b\_ d1wg7a1 d1u5ea1 d1v61a1 d2coca1 d2ys1a1 d1v5pa1 d1ntya2  
d1wjma1 d1wila1 d1u29a\_ d1xx0a1 d1unqa\_ d2zkmx3 d1fhoa\_ d1v88a1  
d2adza1 d1x1fa1 d1p6sa\_ d2coaa1 d1btka\_ d1v5ma1 d1faoa\_ d2x18a\_  
d1dyna\_ d1x1ga1 d4kaxb\_ d2j59m1 d1ki1b2 d1xcga2 d1txda2 d1u5da1  
d1dbha2 d1wlha\_ d1upqa\_ d1v5ua1 d1foea2 d2fjla1 d1eaza\_ d2dfka2  
d2cofa1 d1kz7a2 d1h6ua1 d9ldta1 d2ewda3 d1up7a1 d2dfda1 d1s6ya1  
d1vjta1 d7mdha1 d1hyea1 d1t2da1 d1ojsa3 d1ldna1 d1hyha1 d1civa1  
d2a92a1 d1ez4a1 d1i0za1 d1y6ja1 d1gv0a1 d1ur5a1 d1llda1 d1lobba1  
d1v8ba1 d1gdha1 d1l7da1 d2dlda1 d1mx3a1 d1ygya1 d1qp8a1 d1j4aa1  
d2naca1 d1npya1 d3t4ea2 d1a4ia1 d1o0sa1 d2hk9a2 d2egga2 d1b26a1  
d1bvua1 d1gq2a1 d1c1da1 d1leha1 d1gtma1 d1euza1 d1nvt1 d3dona2  
d1ledza1 d1gpja2 d1vi2a1 d1p77a1 d1nyta1 d1b0aa1 d1vl6a1 d1v91a1  
d1txga2 d3f47a1 d1mv8a2 d2pv7a2 d1xc2a3 d2ahra2 d4xiya1 d2f1ka2  
d1pgja2 d1i36a2 d1np3a2 d1l1j8a4 d1teaa3 d2i76a2 d2g5ca2 d1wdka3  
d1dlja2 d3cuma3 d1kola2 d1f8fa2 d1qora2 d1jqba2 d1vj0a2 d1cdoa2  
d1gu7a2 d1d1ta2 d1xa0a2 d2dm6a2 d1jvba2 d1rjwa2 d1llua2 d1h2ba2  
d1tt7a2 d1piwa2 d1o89a2 d1liz0a2 d1e3ja2 d1yb5a2 d1uufa2 d1e3ia2  
d3gpdg1 d1vc2a1 d2nvwa1 d1u8fo1 d1ydwa1 d1hdgo1 d2g17a1 d1cf2o1  
d2czca2 d1r0ka2 d1lobfo1 d2cvoa1 d1ebfa1 d1h6da1 d1i32a1 d1zh8a1  
d2q49a1 d1qkia1 d1j5pa4 d3pzra1 d1xeaa1 d1vkoa1 d1vm6a3 d3qvsal

d2pkqo1 d1b7go1 d1gr0a1 d1p1ja1 d1lc0a1 d1j0xo1 d3pwka1 d2hjsa1  
d1zyao1 d1vkna1 d1tltal d1nvmb1 d3sjua\_ d3ojfa1 d1xu9a1 d2jjya1  
d1n7ha\_ d1y1pa1 d1jtva\_ d4fs3a\_ d2bkaa1 d1gy8a\_ d2c5aa1 d1ulsa\_  
d1ooea\_ d2b69a1 d1y5ma1 d1spxa\_ d1aela\_ d1bxka\_ d1ydea1 d1gega\_  
d1hdoa\_ d1o5ia\_ d1e6ua\_ d1snya1 d2rhca\_ d3zv4a\_ d5ceja\_ d2d1ya1  
d1fjha\_ d3w8ea\_ d2fmua1 d1x1ta\_ d1rpna\_ d3ay7a1 d1k2wa\_ d1eq2a\_  
d2hrba1 d3ruaa\_ d2ew8a1 d4hwka\_ d1xgka\_ d2bd0a1 d1yo6a1 d2a35a1  
d2ntva\_ d1vl8a\_ d1hdca\_ d4bkua\_ d2ag5a1 d2q45a\_ d1nffa\_ d4iy1a\_  
d1zbqa1 d1kewa\_ d1ek6a\_ d1ja9a\_ d2q46a2 d1iy8a\_ d1cyda\_ d2ptga\_  
d1hxha\_ d1uzma1 d31yla\_ d4m89a\_ d3wyea\_ d2blla1 d1w6ua\_ d1sb8a\_  
d2q2va\_ d4nr0a\_ d1e6wa\_ d2gasa\_ d3oiga1 d2bgka1 d1mxha\_ d1vl0a1  
d1rkxa\_ d1r6da\_ d1wmaa1 d1e7wa\_ d2c07a1 d1xkqa\_ d3tzha\_ d1g0oa\_  
d3lz6a\_ d1qyca\_ d1ledoa\_ d1gz6a\_ d1oc2a\_ d1t2aa\_ d1zema1 d2xoxa\_  
d1z45a2 d1geea\_ d1p33a\_ d3lt0a\_ d4e6pa\_ d2wyua\_ d1db3a\_ d4q9na\_  
d1xhla\_ d4o1ma\_ d1fmca\_ d2uvda\_ d2gdza1 d1uaya\_ d2z1ma\_ d2o23a2  
d2fr1a2 d2fr1a1 d1qsga\_ d1qyda\_ d4zjua\_ d2a4ka1 d1yb1a\_ d1wvga1  
d1yxma1 d3f4ba\_ d1mg5a\_ d1xg5a1 d2gfoa1 d1vjva\_ d2ayna1 d3nhea\_  
d1cmxa\_ d1xd3a\_ d3ifwa\_ d1e2ta\_ d4c5pa\_ d2bsza1 d4bgfa\_ d1w4ta1  
d1ex0a4 d1g0da4 d2f4ma1 d1x3za\_ d1qxp4 d1ziva1 d1zema1 d3ioqa\_  
d1fh0a\_ d1o0ea\_ d1khqa\_ d1m6da\_ d2cb5a\_ d1cs8a\_ g8pch.1 d1s4va\_  
d2pnsa\_ d1vsna1 d1mira\_ d1liwda\_ d2oula\_ d7pcka\_ d3bwka\_ d3bcna\_  
d2p86a\_ d1pvja\_ d1pcia\_ d1gece\_ d1deua\_ d4bs6a\_ d1xkga1 d1cqda\_  
d1jqpa2 d2c0ya\_ d2bdza\_ d3p5ua\_ d2o36a\_ d1k9xa\_ d1zoya1 d1qo8a2  
d1d4ca2 d1chua2 d1kf6a2 d2jk6a2 d2jk6a1 d1feca1 d1feca2 d1lpfa1  
d1lpfa2 d1xhca1 d1xhca2 d1dxla2 d1dxla1 d1gera2 d1m6ia2 d1onfa1  
d1onfa2 d3lada2 d3lada1 d1w4xa1 d1w4xa2 d1gesa2 d1mo9a1 d1xdia1  
d1fl2a2 d1fcda1 d1fcda2 d1h6va2 d1h6va1 d1mo9a2 d1gv4a2 d1gv4a1  
d2gv8a2 d2gv8a1 d1aoga1 d1aoga2 d1hyua1 d1ebda1 d1ebda2 d3dk9a1  
d1q1ra2 d1q1ra1 d1gesa1 d1zbfal d2z1ha\_ d2etja1 d3qioa1 d1j11a\_  
d2e41a\_ d1j12a\_ d21sna1 d1io2a\_ d1uaxa\_ d2yv0x\_ d1mu2a1 d1ekea\_  
d1i39a\_ d1ps9a2 d1lqta1 d1cjca1 d1pn0a1 d1reoa1 d1ju2a1 d2f5va1  
d3c96a1 d2gmha1 d1pj5a2 d1gpea1 d1o5wa1 d1n4wa1 d1k0ia1 d2dw4a2  
d2ivda1 d1seza1 d2voua1 d1kdga1 d1s5ja1 d2hbja2 d2igia\_ d1wlja\_  
d1qhta1 d4dlea1 d1tgoa1 d2f96a1 d3tr8a1 d3mxma\_ d1q8ia1 d1y97a1  
d1w0ha\_ d2py5a1 d1noya\_ d1d5aa1 d1yt3a3 d2guia\_ d3mwpa1 d4kb1a\_  
d1b9ra\_ d1offa\_ d1frra\_ d3wcqa\_ d1e9ma\_ d1l5pa\_ d1wria\_ d1i7ha\_  
d3av8a\_ d1czpa\_ d1rfka\_ d3p1ma1 d3b2ga\_ d2bt6a2 d1kv9a1 d1jmx3  
d1pbya3 d1pbya4 d1r7ha\_ d1faaa\_ d1wika1 d1xfla\_ d1ttza1 d2f51a1  
d1ti3a\_ d1nhoa\_ d1sena\_ d2i4aa\_ d1ep7a\_ d1zmaa1 d1fo5a\_ d3lefa1  
d3diea1 d2yana1 d1z6na1 d1oaza\_ d3zywa1 d4aj8a\_ d1nm3a1 d4fiwa\_  
d1wmja\_ d4hs1a1 d1iloa\_ d1xwaa1 d1wjka1 d2vm1a\_ d1fb6a\_ d1gh2a\_  
d1h75a\_ d1nw2a\_ d1kx5b\_ d3a6na\_ d4m6ba2 d2nqbd\_ d3wkjd\_ d2yfwe\_  
d4h9na\_ d5bnxa\_ d1kx5c\_ d3r45a\_ d1eqzb\_ d4jjnb\_ d1f66c\_ d1eqza\_  
d4wnnb\_ d1kx5a\_ d1u35c1 d1id3a\_ d2nqbc\_ d1kx5d\_ d3us3a3 d3us3a1

d2b5ea2 d2b5ea3 d2b5ea1 d2b5ea4 d2kp1a1 d2kp2a1 d1hyua4 d1j08a1  
d1j08a2 d1pd212 d1nhya2 d2a2ra2 d1k0dd2 d1f2ea2 d1gsua2 d1f3ba2  
d2fhea2 d2pvqa1 d1tw9a2 d1oyja2 d1e6ba2 d1k0ma2 d3ik7a1 d4is0a1  
d1r5aa2 d1jlva2 d1m0ua2 d3gtub2 d1z9ha2 d1okta2 d1axda2 d2gsra2  
d1tu7a2 d1k3ya2 d1zgma1 d1gnwa2 d1gwca2 d2gsta2 d1glqa2 d1oe8a2  
d1pn9a2 d1v2aa2 d1fw1a2 d1duga2 d1lig8a1 d1czan2 d1czan1 d1lig8a2  
d1czan4 d1bg3a4 d1bg3a3 d1bg3a2 d1bg3a1 d1qusa\_ d1gd6a\_ d1f6ra\_  
d1livma\_ d2gv0a\_ d1iiza\_ d2z2fa\_ d1j8xa\_ d1ghla\_ d1b9oa\_ d1741a\_  
d1691a\_ d2o4wa\_ d1p37a\_ d1k28a3 d1xjta1 d1jtma\_ d2f2qa\_ d4e97a1  
d1g4ma1 d1g4ma2 d3w3ea\_ d4tx7a\_ d3cq1a\_ d4msta\_ d3iwra\_ d2z37a\_  
d4dyga\_ d2za0a\_ d2c21a1 d2pjsa1 d1k11a\_ d2i7ra1 d1ecea\_ d1xqaa1  
d5cj3a1 d1jifa\_ d2p7oa\_ d1r9ca\_ d1nkia\_ d1mpya2 d1kw3b2 d1kw3b1  
d4ghga1 d1tfza1 d3isqa1 d3isqa2 d1sqia1 d1sqia2 d1lkda2 d1lkda1  
d1mpya1 d1cjxa1 d1sp9b2 d1t47a1 d1t47a2 d1f1ua2 d1sp8a1 d1sp8a2  
d1f1ua1 d1etob\_ d1umqa\_ d1g2ha\_ d1ro5a1 d1s5ja2 d1qhta2 d4dlea2  
d1tgoa2 d3py8a2 d1q8ia2 d1kfsa2 d2py5a2 d1d5aa2 d1qsta\_ d2beia1  
d4m3sa\_ d1u6ma1 d1ygha\_ d1yk3a1 d3dr6a\_ d1xmta\_ d1z4ea1 d2ge3a1  
d1bo4a\_ d2fiaa1 d2jdca1 d1y9wa1 d3to7a\_ d1wwza1 d2fl4a1 d2ozua1  
d2b5ga\_ d2cy2a1 d2p0wa\_ d1cm0a\_ d4pswa\_ d1yrea1 d1yr0a1 d1m4ia\_  
d2gana1 d1yvka1 d1ghea\_ d2g3aa1 d1y7ra1 d2euia1 d1q2ya\_ d2fsra1  
d1xeba\_ d2ae6a1 d1cjwa\_ d1qsmas\_ d2aj6a1 d1y9ka1 d1i12a\_ d1vkca\_  
d2atra1 d1n71a\_ d2d4pa1 d2fiwa1 d2fe7a1 d1tiqa1 d2ou2a\_ d1yx0a1  
d2fcka1 d1p0ha\_ d2j8ma\_ d2pq8a\_ d1z4ra1 d1s3za1 d1ufha\_ d1xvqa1  
d1pn0a2 d3hy2a\_ d2cvba1 d1o8xa\_ d1lu4a\_ d1we0a1 d2bmxal d2a4va1  
d1psqa\_ d1xiya1 d1q98a\_ d1n8ja\_ d1zofa1 d2ggta\_ d3tjja\_ d4jela1  
d1o73a\_ d3s9fa\_ d2zcta\_ d1qmva\_ d1jfua\_ d2b1ka\_ d5dvba1 d2b5xa1  
d2v2ga\_ d1st9a\_ d3tb2a\_ d4llra\_ d4fh8a1 d1e2ya\_ d1knga\_ d2h30a\_  
d1i5ga\_ d2z9sa\_ d2f8aa1 d1tp9a1 d2b7ka\_ d1nm3a2 d3hvva\_ d2wfca1  
d4kcea\_ d1xvwa1 d4gqca1 d3qpma\_ d4k1fa\_ d1zsoa1 d1gp1a\_ d1prxa\_  
d1zsqal d2qked\_ d4ksoa\_ d1t4za1 d1wwja\_ d1f74a\_ d3l21a\_ d2e1da\_  
d1to3a1 d1w3ia\_ d1sfla\_ d1n7ka\_ d1vcva1 d4imea\_ d1wa3a\_ d2ocza1  
d1f2ja\_ d3m16a\_ d2yxga\_ d1ub3a\_ d3a5fa\_ d1fbaa\_ d1l6wa\_ d1xfba1  
d1wx0a1 d1vpxa1 d1ojxa\_ d2a4aa1 d1xkya1 d3cq0a1 d3s1xa\_ d1f05a\_  
d1fdja\_ d3cpra1 d4d2ja\_ d1etha2 d1w52x1 d2ppla1 d1lpbb2 d2oxea1  
d1bu8a2 d1rp1a2 d1lgya\_ d4l3wa\_ d1llfa\_ d1gz7a\_ d1lukca\_ d1j1ia\_  
d2rhwa\_ d1ra6a\_ d1muka\_ d3gsza\_ d1khva\_ d1te9a\_ d2xwha\_ d3uqsa\_  
d3hkwa\_ d3n6ma\_ d2cjqa\_ d2xyma\_ d1teba\_ d1te8a\_ d1u09a1 d4wfxa\_  
d3tyqa\_ d2pgga1 d2ddfa\_ d3zxha\_ d1cgl\_a\_ d1rm8a\_ d1leaka2 d1hy7a\_  
d2jsda\_ d1cxva\_ d1hv5a\_ d1i76a\_ d3p0ya1 d1igra1 d1igra2 d1n8yc2  
d1n8yc1 d1m6ba2 d1m6ba1 d1dzka\_ d4tlja\_ d2a2ua\_ d4wfv\_a\_ d3t1da\_  
d4iaxa\_ d3zq3a\_ d2nnda\_ d1i4ua\_ d1kxoa\_ d1bbpa\_ d1kt7a\_ d1exsa\_  
d3s26a1 d1lf7a\_ d1qfta\_ d4gh7a\_ d1z24a1 d1qabe\_ d1xkia\_ d1ew3a\_  
d3bx7a\_ d4iawa1 d1n0sa\_ d1gkab\_ d3kzaa\_ d2k23a\_ d2l9ca1 d2joza1  
d1gm6a\_ d3kffa\_ d3saoa1 d1e5pa\_ d1yupa1 d1iia\_ d2tbvc\_ d1c8nc\_

d1x36a\_ d1smvc\_ d1ng0c\_ d4sbvc\_ d1f2nc\_ d1js9c\_ d1za7a\_ d1laja\_  
d1rypd\_ d1lirua\_ d1rypc\_ d3unfk\_ d1rypa\_ d1j2pa\_ d1lirui\_ d1j2qh\_  
d3unfh\_ d1m4ya\_ d1rypb\_ d1lirul\_ d1lirug\_ d1liru2\_ d1q5rh\_ d1rypg\_  
d1g3ka\_ d1liruf\_ d1q5qa\_ d1e94a\_ d1lirub\_ d1ryph\_ d3ty6a\_ d1liruj\_  
d1liruk\_ d1rype\_ d1lirud\_ d1lirue\_ d3mi01\_ d1rypf\_ d1liruh\_ d2z3ba\_  
d1liruc\_ d3mka2\_ d1liru1\_ d1ny721\_ d1a6ca3\_ d1a6ca2\_ d1a6ca1\_ d1pgl22  
d1pgl21\_ d1pgl11\_ d1ny711\_ d1jgta2\_ d1ofda3\_ d1ea0a3\_ d1ecfa2\_ d1q15a2  
d1ao0a2\_ d1te5a\_ d1y14b1\_ d2nn6i1\_ d1i941\_ d2zjra2\_ d1smxa\_ d2qamc2  
d1hh2p1\_ d2r7da1\_ d1rl2a2\_ d1wfga1\_ d3bzka4\_ d1x6oa2\_ d3a0ja\_ d2j01d2  
d2ja9a1\_ d4q15a\_ d1hr0w\_ d1luza\_ d2n3sa\_ d2vnud1\_ d1h95a\_ d1go3e1  
d2nn6h1\_ d1ne3a\_ d2mola\_ d1liz6a2\_ d1jjga\_ d1e3pa2\_ d2ix0a3\_ d2ix0a2  
d2lxja\_ d1ueba3\_ d1ueba2\_ d2z0sa1\_ d1u0la1\_ d2ix0a1\_ d2eifa2\_ d2je6i1  
d3i2za1\_ d2c35b1\_ d2ahob2\_ d1t9ha1\_ d3i4oa\_ d2qall1\_ d1jt8a\_ d2nn6g1  
d1g6pa\_ d3cama\_ d1i94q\_ d1c9oa\_ d1d7qa\_ d2ba0a1\_ d2vnud2\_ d2vnud3  
d1khia2\_ d2qalq1\_ d1wi5a1\_ d1xtda2\_ d1ny4a\_ d4w9ta\_ d1jvna1\_ d4x2ra1  
d1ka9f\_ d1qo2a\_ d4axka1\_ d1h5ya\_ d4u28a\_ d2y88a\_ d4wd0a\_ d1vzwa1  
d1ix2a\_ d2flia1\_ d1h1ya\_ d1tqja\_ d1tqxa\_ d4lt9a1\_ d3tc7a1\_ d3hoja\_  
d1i4na\_ d3vnda\_ d3nl8a1\_ d1geqa\_ d3naval\_ d1v5xa\_ d4a2ra1\_ d3tc6a1  
d1ujpa\_ d4ijba\_ d1xcfa\_ d1vc4a\_ d1rd5a\_ d1qopa\_ d3b5va\_ d2r80b\_  
d1cqxa1\_ d1cg5a\_ d1gcvb\_ d3boma\_ d2h8fb\_ d2raoa\_ d3bj1a\_ d4hrrb\_  
d2r50a\_ d3d1kb\_ d2aa1b1\_ d3zhwa\_ d3hf4b\_ d3gdja\_ d1jebb\_ d3bj1b\_  
d1x9fb\_ d1wmub\_ d1gcva\_ d3bcqb\_ d3d4xb\_ d1gvha1\_ d2dc3a\_ d3hf4a\_  
d4yu3a\_ d3k8ba\_ d1qpwb\_ d2r80a\_ d3bcqa\_ d1v4wa\_ d3wtgb\_ d1j17a\_  
d4esaa\_ d1a9we\_ d3d1ab\_ d1fsla\_ d4h21a\_ d1v4wb\_ d1mwca\_ d1vhba\_  
d1jeba\_ d1spgb\_ d1h97a\_ d1q1fa\_ d1tu9a1\_ d3d1aa\_ d1hdsb\_ d3hyub\_  
d2zfb\_ d3fs4a\_ d1oj6a\_ d1shrb\_ d4h21b\_ d4yu3b\_ d1spga\_ d3hrwa\_  
d3qqra\_ d3at5a\_ d4wchd\_ d3hyua\_ d1cg5b\_ d1uc3a\_ d1hbra\_ d2raob\_  
d1outb\_ d4esab\_ d3gdjb\_ d3qqqa\_ d1x9fc\_ d3vrfa\_ d1litha\_ d3mkba\_  
d3d4xa\_ d3mjpa\_ d1j16a\_ d3fh9a\_ d1outa\_ d2dc3b\_ d1it2a\_ d3eoka\_  
d3g46a\_ d1qpwa\_ d3vrfb\_ d1ch4a\_ d1x9fd\_ d1hdsa\_ d2zfa\_ d3mkbb\_  
d1or4a\_ d3wtga\_ d1a4fa\_ d3fh9b\_ d3bomb\_ d3cy5a\_ d3at5b\_ d1x9fa\_  
d2oifa\_ d4lmb\_ d1cpcb\_ d3v57a\_ d1kn1a\_ d1cpca\_ d4f0ta\_ d2vjha\_  
d4po5b\_ d1eyxa\_ d1alla\_ d4f0tb\_ d1b33b\_ d1b8db\_ d4h0mb\_ d2vjhb\_  
d4lm6b\_ d2vmlb\_ d1allb\_ d2vjta\_ d3dbja\_ d2vmla\_ d2vjtb\_ d4f0ub\_  
d1f99b\_ d4rmpa1\_ d1liaa\_ d1eyxb\_ d2uulb\_ d4lmsb\_ d4f0ua\_ d2bv8a\_  
d1f99a\_ d2bv8b\_ d2c71b\_ d3dbjb\_ d4rmpb1\_ d1b8da\_ d4h0ma\_ d3v57b\_  
d1kn1b\_ d1liab\_ d2uula\_ d2j96a\_ d3ia2a\_ d1a88a\_ d4dgqa1\_ d1hkha\_  
d1zoia\_ g1gxs.1\_ g1wht.1\_ d2xqfa\_ d1ea5a\_ d1f6wa\_ d1dx4a\_ d1qe3a\_  
d1k4ya\_ d4qwwa\_ d2ha2a\_ d1r88a\_ d1sfra\_ d4qeka\_ d3c8da2\_ d2pbla1  
d1jjia\_ d1lzl\_ d1jjfa\_ d4iuua3\_ d4bvva\_ d5hpga\_ d3k65a\_ d1ki0a3  
d1ki0a2\_ d1ki0a1\_ d1a0ha1\_ d1pmla\_ d3sp8a3\_ d2feba1\_ d2m5ta\_ d1cqqa\_  
d1wqsa\_ d5bpea\_ d2ipha\_ d1lvoa\_ d2bhga1\_ d3tnta\_ d3sjia\_ d3d23a1  
d2fyqa\_ d3tloa\_ d3zvea1\_ d2hrva\_ d3q3ya1\_ d4asha1\_ d1cg2a1\_ d1yloa2  
d1y7ea2\_ d1y0ya3\_ d1lfwa1\_ d1vixa1\_ d1fnoa4\_ d1ysja1\_ d1vhea2\_ d1z21a1

d2fvga2 d1vgya1 d1r3na1 d2grea2 dlxmba1 glq7l.1 dlrtqa\_ d3rp2a\_  
glucy.1 d1fuja\_ d2zchp\_ d3w94a\_ d1si5h\_ d1lo6a\_ g2pka.1 d1cgha\_  
d1kigh\_ d1a5ia\_ d3s9ba\_ d1hj8a\_ d1ao5a\_ d2anya\_ d1q3xa1 d1gvza\_  
d4gsoa\_ d2f91a1 d1iaua\_ d1gdna\_ d1eufa\_ glfiw.1 d1eq9a\_ d4nfea\_  
d2rdla\_ d1spja\_ d1elva1 d1a7sa\_ d1ekbb\_ d1pfxc\_ d1yc0a\_ d2aiqa\_  
glfiz.1 d1fi8a\_ d4k60a\_ d4dgja\_ d1mzaa\_ d1op0a\_ d3tjva\_ d1pytd\_  
d1sgfg\_ glgg6.1 d2eeka\_ glrtf.1 d1a0ja\_ d3g01a\_ d1pytc\_ d4e7na\_  
d1ddja\_ d1z8ga1 d2hlca\_ d1npma\_ d1lbrup\_ gljou.1 d1sgfa\_ d1autc\_  
g2hnt.1 glkdq.1 d1orfa\_ d3s69a\_ d4crga\_ d1fxya\_ d1bqya\_ d1svpa\_  
d1mbma\_ d3su6a1 d1cula1 d4agka\_ d1vcpa\_ d1q31a\_ gln1l.1 d3e90b\_  
d1ep5a\_ d3u1jb\_ d2bk7a\_ d3fjua\_ d1z5ra1 d1kwma1 d1uwy2 d1jqga1  
d2c1ca1 d1dtda\_ d1h8la2 d3lgia\_ d3i77a\_ d2z9ia2 d4nsva\_ d1lcya2  
d4jcna\_ d1agja\_ d1os8a\_ d1hpga\_ d1p3ca\_ d1l1ja\_ d1e69a\_ d1mv5a\_  
d3g60a4 gl1i8.1 d1ewqa2 d1ji0a\_ d1qhla\_ d1v43a3 d2wmfa1 d1vpla\_  
d1g2912 d4a82a2 glf2t.1 d2d62a1 d3tuic1 d2bbsa1 d3g60a3 d2ixea\_  
d1g6ha\_ d1sgwa1 d2qi9c\_ d3rlfa1 d3b60a1 d3d31a2 d2pzea1 glxew.1  
d1jj7a\_ d1oxxk2 d2onka1 d1wlwa\_ d1iwea\_ d1qf5a\_ d1vmaa2 d1nija1  
d1np6a\_ d2p67a1 d3ihla\_ d1okkd2 d1lsl1a2 d1slma2 d1liona\_ d2v40a\_  
d3hida\_ d2vola1 d2g0ta1 d1vcoa2 d1j8mf2 d1g3qa\_ d1xjca\_ d1p9ba\_  
d1qzxa3 d1ihua2 d1ihua1 d2qm8a\_ d1dj2a\_ d4ioja\_ d1cp2a\_ d1yrba2  
d1hyqa\_ d3gqba2 d1skye3 d1xp8a1 d1tf7a2 d1tf7a1 d1ye8a1 d1skyb3  
d2qe7d2 d4blta\_ d4huta\_ d3ldaa2 d4hyya\_ d2i3ba1 d1crla\_ d3j9tb2  
d3ntua2 d1vdza1 d2z43a\_ d1e9ra\_ d1nlfa\_ d3ziaa2 d1n0wa\_ d1g6oa\_  
d3ziad2 d3j9ta2 d1pzna2 d3gqbb2 d2i49a\_ d1nnfa\_ d1xvxa\_ d1ursa\_  
d1h3da1 d1iuda\_ d4mlva1 d1twya\_ d3e13x\_ d2nxoa1 d4pfua\_ d3ttma\_  
d1elja\_ d2qmwa1 d1us5a\_ d1y3na1 d1jeta\_ d1uqwa\_ d4f19a1 d2esna2  
d3thia\_ d3fasa1 d2uyeb\_ d2xwva1 d1r9la\_ d2fyia1 d1pb7a\_ d2ozza1  
d1sw5a\_ d1nh8a1 d1vr5a1 d2g29a\_ d1xs5a\_ d3lswa\_ d2z23a\_ d3w9va\_  
d3tcha\_ d1q35a\_ d1z7me1 d3q27a\_ d1p99a\_ d1ve4a1 d2i6ea1 d4mcoa1  
d4n8ya\_ d1eu8a\_ d1zbma1 d1hsla\_ d1ixca2 d1j1na\_ d1xvya\_ d1y9ua\_  
d2z22a1 d1xoca1 d4oera\_ d1wdna\_ d5f1qa1 d1xt8a1 d1i6aa\_ d4gwoa\_  
d4igta1 d1pc3a\_ d4mmpa1 d1o63a\_ d2czla1 d2onsa2 d4mija1 d1eh3a\_  
d3skpa\_ d1dtza1 d1dtza2 d1ieja\_ d1jnfa2 d1ce2a1 d1jnfa1 d1b1xa2  
d1b1xa1 d1jw1a1 d1jw1a2 d1h76a1 d1h76a2 d1c4oa1 d2p6ra3 d2p6ra4  
d1oywa2 d1oywa3 d1wrba1 d1w36b2 d1w36b1 d1c4oa2 d3bora\_ d1t6na\_  
d2eyqa5 d2eyqa3 d2eyqa2 d2zu6a2 d1veca\_ d1uaaa1 d1w36d1 d2g9na1  
d1z3ix2 d2rb4a\_ d1hv8a1 d1hv8a2 d1t5ia\_ d1w36c2 d2j0sa2 d2j0sa1  
d1fuka\_ d3hjha1 d1z5za1 d1qdea\_ d1z63a1 d1s2ma2 d1s2ma1 d1wp9a1  
d1wp9a2 d1gm5a3 d1gm5a4 d3dina4 d3dina3 d1q0ua\_ d1w36c1 d1z3ix1  
d1nkta4 d1uaaa2 d1w36d2 glqhh.1 d2fwra2 d2fwra1 d3q3ma\_ d1za0a1  
d1mxra\_ d2inca\_ d1jk0a\_ d2incb\_ d1mhyb\_ d3hf1b\_ d1mtyb\_ d1r2fa\_  
d2uw1a\_ d1mhyd\_ d3n37a\_ d1afra\_ d1oquc\_ d1syya\_ d1mtyd\_ d2o1za\_  
d1uzra\_ d1smsa\_ d2fkza\_ d1zujal d1s3qa1 d2fjca1 d1z6om1 d1veia\_  
d4dyya\_ d1jiga\_ d3gvya\_ d2pyba\_ d4cy9a1 d3bvfa1 d1r03a\_ d2cf7a\_

d1nf4a\_ d1zs3a1 d4iwka\_ d3ka8a\_ d3np0x\_ d1n1qa\_ d1lb3a\_ d4e6ka\_  
d1z6oa1 d2fzfa1 d4dyua\_ d3ge4a\_ d4am4a\_ d2z6ma\_ d1ji5a\_ d1vlga\_  
d1lkoa1 d1krqa\_ d3qz3a\_ d1o9ra\_ d2ffxj\_ d1euma\_ d1yv1a1 d2v2pa\_  
d1j30a\_ d4di0a\_ d1dpsa\_ d1oewa\_ d2qzxa\_ d2asia\_ d1psoe\_ d1smra\_  
d2h6ta\_ d1pfza\_ d1lizda\_ d3hd8a\_ d1j71a\_ d1dpja\_ d4aa9a\_ d1t6ex\_  
g1b5f.1 g1lya.1 g1htr.1 d1qdma2 d1bxoa\_ d1wkra\_ d1tzsa\_ d1libqa\_  
d2qzwa\_ d2v76a\_ d1wj1a1 d1aqca\_ d1qqga2 d1qqga1 d1ntva\_ d1n3ha\_  
d4dbba\_ d3f0wa1 d1p3ra\_ d1wgua1 d2cy4a1 d3hqca\_ d1wvha1 d1xr0b1  
d1bdqa\_ d3ggta\_ d3ixoa\_ d1mrxa\_ d2haha\_ d1tw7a\_ d4njsa\_ d1sgua\_  
d2p3da\_ d1nsoa\_ d3d3ta\_ d2rkfa\_ d1c6ya\_ d2rspa\_ d3ogpa\_ d3ekwa\_  
d2o4na\_ d2j9ja\_ d1baia\_ d3ggua\_ d3lzua\_ d4npua\_ d4j55a\_ d2r8na\_  
d2fxda\_ d2p3ca\_ d4dqea\_ d3ttpa\_ d3t3ca\_ d2p3aa\_ d2hc0a\_ d2fdda\_  
d3mwsa\_ d1um8a\_ d1lixza\_ d1qvra2 d1qvra3 d1qzma\_ d1sxjc2 d1jr3d2  
d2p65a\_ d1l8qa2 d1g8pa\_ d3hu3a3 d1sxjd2 d1njfa\_ d1in4a2 d1sxja2  
d1tuea1 d2ce7a2 d1w5sa2 d1sxjb2 d1d2na\_ d1ny5a2 d1ofha\_ d2gnoa2  
d2a5yb3 d1fnna2 d1u0ja1 d1lv7a\_ d1iqpa2 d2fnaa2 d1ixsb2 d4gita\_  
d1sxje2 d1k8rb\_ d1wgra1 d1ef5a\_ d1wfy1 d1wgya1 d1l1fa\_ d2cs4a1  
d1wxma1 d2byea1 d3kh0a1 d2byfa1 d1wxaa1 d1e7ua3 d1h4ra3 d4yl8a1  
d2a16a3 d1wgda1 d1wgg1 d4q5eb\_ d1wjna1 d1se9a\_ d3n3kb\_ d1wz0a1  
d1we6a1 d2m0xa\_ d2gbka\_ d3rt3b1 d1wh3a1 d1sifa\_ d2ekek2 d4ii2b1  
d4hk2a1 d1c3ta\_ d1m94a\_ d1wgha1 d1ttna1 d1j8ca\_ d1wx8a1 d3v6cb1  
d2ma9b\_ d4i61b1 d1bt0a\_ d2jvca1 d1iyfa\_ d2k1fa\_ d1wxva1 d1wf9a1  
d1t0ya\_ d2io0b2 d1x1ma1 d2gbma\_ d1zw7a1 d2m17a\_ d1ud7a\_ d1we7a1  
d2lwp1 d2gbja\_ d1wjua1 d1v6ea1 d1v86a1 d4eewa\_ d1wiaa1 d4icva\_  
d4gu2a\_ d1wx7a1 d1wy8a1 d4hjka1 d2faza1 d1v5oa1 d4lu0a\_ d1of8a\_  
d3unda1 d3e9aa1 d1vr6a2 d1n8fa\_ d2qkfa\_ d1d9ea\_ d2ftba\_ d1pmpa\_  
d2rcqa1 d1fdqa\_ d4lkpa\_ d1sa8a\_ d1vyfa\_ d1lpja\_ d3vg7a1 d4azqa1  
d1o8va\_ d5bvqa\_ d1p6pa\_ d2qo4a\_ d1opba\_ d1yiva1 d1o1va\_ d4bvma1  
d4tkba\_ d4i3ba\_ d1bwya\_ d1ftpa\_ d1ggla\_ d4gkca\_ d1cbia\_ d3p6da1  
d1kqwa\_ d2a0aa1 d1iyka2 d1rxta1 d1iica2 d1iica1 d1adqa1 d1fnga1  
d1uvqb1 d1zs8a1 d2vola1 d2vola2 d1mfb12 d2jelh2 d1uwel2 d3qq4b1  
d1kjob\_ d1k5na1 d1osph2 d4odh12 d1ow0a1 d1ow0a2 d1bfob2 d3l9ra2  
d3jtth1 d2fath2 d4elkb2 d1fn4b2 d2xfxb\_ d1pg7x2 d1cqa\_ d4k71b2  
d1lk2a1 d1eapb2 d4lfhg2 d1i4fa1 d2nw2a2 d1kfah2 d1mhca1 d1h3ua1  
d1wejh2 d1h0db2 d1a5fh2 d1kcvh2 d1mjuh2 d1qqda1 d1kcrh2 d1k8ia1  
d3huja2 d2nnab1 d1nfd2 d3mffb2 d1s9va1 d1lk3h2 d1q0x12 d1fv1b1  
d1neza1 d4rfeb2 d1r3ha1 d1a6tb2 d1kjva1 d1pz5b2 d1onqa1 d2bc4a2  
d1de4a1 d1k8da1 d1tcra2 d1dn0b2 d1nfd2 d2xwtb2 d1bfoa2 d1mexh2  
d1iakb1 d1ypzf2 d4f7ea2 d1q7212 d2fbjh2 d1fe8h2 d1clzh2 d1fngb1  
d1uvqa1 d1vgka1 d1c16a1 d4j12a2 d4x99b2 d1igtb3 d1je6a1 d1q72h2  
d1nldh2 d1teth2 d2hmic2 d1ilca2 d1ilca1 d1k8ib1 d1q0yh2 d1kfa12  
d3frua1 d1pg7w2 d1u58a1 d1igyb4 d1igyb3 d1hyrc1 d1klub1 d1deeb2  
d1c12b2 d2bc4b2 d2ig2h2 d1kcv12 d3wn5b1 d1lk2b\_ d1lk312 d1mjul2  
d1sm3h2 d1q0xh2 d1zvs1 d1ydp1 d1u8ib2 d1ypze2 d1kcuh2 d21j7a\_

d1n4na\_ d2m8bb1 d2kyqa\_ d3psma\_ d1jxca\_ d2g11a\_ d1ugla\_ d4uj0a\_  
d2k4ua\_ d1hp2a\_ d21u9a\_ d1baha\_ d2meoa1 d1wm7a\_ d1hlya\_ d1n8ma\_  
d1jlza\_ d1wpda\_ d1c55a\_ d1pvza\_ d1wt7a\_ d1wz5a\_ d1m2sa\_ d1pjva\_  
d1c49a\_ d1qkya\_ d2ktca1 d1wmta\_ d1du9a\_ d1j5ja\_ d1r1ga\_ d1e3oc2  
d1ic8a2 d1t0za\_ d2i61a\_ d1t1ta\_ d1sn4a\_ d1kv0a\_ d21kba\_ d1npia\_  
d1wwna\_ d1pe4a\_ d2kbka\_ d2li7a\_ d1djta\_ d2kbha\_ d1dq7a\_ d1sega\_  
d1omya\_ d1zywa1 d1jzaa\_ d1n9wa1 d1bbua1 d1e1oa1 d1b8aa1 d1l0wa1  
d3a74a1 d1eova1 d1t61c1 d1iyjb4 d1iyjb5 d1iyjb3 d1o7ia\_ d4ipca1  
d1x3ea\_ d4apva\_ d1jb7a1 d1jb7a2 d1jb7a3 d3kdfa\_ d1ue1b\_ d1wjja1  
d3eiva\_ d1xjva2 d1xjva1 d2ccza2 d1se8a\_ d1l1oc\_ d1jb7b\_ d1qvca\_  
d1qzga\_ d1miua4 d1miua5 d1miua3 d3g48a1 d1gd7a\_ d1jjcb3 d1pyba\_  
d3ubub\_ d1legia\_ d1qo3c\_ d1v7pa\_ d1tdqb\_ d3ubua\_ d1c3ab\_ d1h8ua\_  
d3bx4b\_ d1t8ca1 d1sb2a1 d1qdda\_ d2ziba1 d3cada\_ d1byfa\_ d1j34b\_  
d1jwia\_ d1jzna\_ d1c3aa\_ d1oz7b\_ d1wmza\_ d3bdwb\_ d1hq8a\_ d1fifa1  
d1dv8a\_ d3hupa\_ d1wk1a1 d1umra\_ d2afpa\_ d3bx4a\_ d1gz2a\_ d1sl6a\_  
d1v7pb\_ d3g8ka\_ d1ixxa\_ d1j34a\_ d1jwib\_ d1g1sa1 d1y17a1 d1ja3a\_  
d1fvub\_ d3bdwa\_ d1sb2b1 d1fvua\_ d1umrc\_ d1oz7a\_ d4m17a\_ d3cfwa1  
d1ypqa1 d3fd4a\_ d3l9jc\_ d4dn8a1 d1v41b\_ d1rdl1\_ d2msba\_ d1dgsa2  
d1fvia1 d1ckma1 d1x9na2 d1pfsa\_ d2a1ka\_ d1rpma\_ d2shpa1 d1yfoa\_  
d1l8ka\_ d2ooqa1 d1g4us2 d1p15a\_ d1lara2 d1lara1 d1wcha\_ d2fh7a2  
d2fh7a1 d1ohea2 d2f4da\_ d1rxda\_ d2hxpa\_ d1xria\_ d1d5ra2 d1fpza\_  
d3ezza\_ d4y2ea\_ d1i9sa\_ d3azya\_ d3wvja\_ d1upsa1 d1ajoa\_ d2hyka\_  
d1ajka\_ d2vy0a\_ d1o4ya\_ d3o5sa\_ d3d6ea\_ d3atga\_ d1dypa\_ d1umza\_  
d3i4ia\_ d1c11a\_ d41bqa\_ d1a78a\_ d1slta\_ d4no4a\_ d3zsj\_ d3duia\_  
d1is3a\_ d1qmja\_ d1hlca\_ d1tdha3 d1q3ba3 d1ee8a3 d1k82a3 g1qmo.1  
g1len.1 d3zyra\_ d1fn\_ d1n47a\_ g2ltn.1 d1avba\_ d3usua\_ d1dhkb\_  
d1f9ka\_ d1ukga\_ d1g8wa\_ d1g9fa\_ d1wbfa\_ d3wcsa\_ d1g7ya\_ g1loe.1  
d1mvqa\_ d1hq1a\_ d1v6ia\_ d1dbna\_ d1qnwa\_ d4l8qa\_ d1ioaa\_ d3n35a\_  
d1eysc\_ d3h33a\_ d1rwja\_ d19hca\_ d1os6a\_ d3bxua\_ d3h4na\_ d1i77a\_  
d3caoa\_ d1j0pa\_ d2ctha\_ d1duwa\_ d1ofwa\_ d2e84a\_ d1hh5a\_ d1gyoa\_  
d3h34a\_ d1dszb\_ d1a6ya\_ d3cbba\_ d1ynwa1 d1r4ia\_ d1hcqa\_ d2hana\_  
d2hanb\_ d2enva1 d1kb4b\_ d2n11b\_ d1l01a\_ d1cita\_ d2dara2 d2dara1  
d1wyha2 d2d1oa2 d1rutx4 d1rutx3 d2cuqa2 d1x41a2 d1x41a1 d1x3ha2  
d1x3ha1 d2d8za1 d1x61a2 d1x6aa1 d1x6aa2 d2cora2 d2cora1 d1v6ga1  
d1v6ga2 d2d8za2 d1x64a1 d1x64a2 d1b8ta1 d2co8a1 d1x63a2 d2dj7a2  
d2dj7a1 d2cu8a2 d2cu8a1 d1g47a2 d1g47a1 d1j2oa1 d1wyha1 d2d1oa1  
d1wiga1 d1wiga2 d2cupa2 d2cupa3 d1x68a1 d2d8ya2 d2d8ya1 d1m3va2  
d1x62a1 d1x68a2 d1x61a1 d1b8ta3 d1b8ta2 d2d8xa2 d2d8xa1 d1x4ka1  
d1x4ka2 d2cuqa1 d1m3va1 d2co8a2 d1j2oa2 d1x63a1 d2cura1 d2cura2  
d1x62a2 d1op9a\_ d1y01a1 d1etzb1 d1legj11 d2gsib1 d1nj9a1 d4jfhdl  
d1aqk11 d1t2ja\_ d1l04h1 d1zvya1 d3v4v11 d4enec1 d1kxtb\_ d5e8ea1  
d2pxya\_ d4weud\_ d1xiwc\_ d2esvd1 d1qnzh\_ d1ogae1 d1f4xh1 d4n1hb\_  
d3ezjb1 d3mlw11 d1kfah1 d1etza1 d1b4jh1 d3cfic\_ d4w68a\_ d2arja1  
d1ek3a\_ d2ok011 d1vera\_ d1uwgh1 d1blnb1 d1fpth1 d1rzga1 d2giya1

d4m3kb1 d1nc2a1 d2nyyd1 d1ncna\_ d1fbih1 d5dxwa\_ d4fqqa1 d1dqdh1  
d1jfq11 d1kelh1 d1faih1 d1frgl1 d1figl1 d4m6n11 d1fo0a\_ d4hxb11  
d3b5ga\_ d3quyd1 d2h9gb1 d1i8kb\_ d2dd8h1 d2ck0h1 d1eaja\_ d4w6wb1  
d2a6ib3 d1t66d1 d2e27h\_ d1ob1b1 d1f11b1 d2v7na1 d1ad0a1 d2xt1b1  
d1pskh1 d4i13b1 d2op4l1 d1a0q11 d1uwel1 d1za3a1 d1ncb11 d4uu9a\_  
d1bm3h1 d1cloh1 d1nqba2 d1cf8h1 d4y5va\_ d1mhph1 d5anma1 d4cdgc1  
d4ldeb\_ d1y01b1 d2pcpb1 d1z3gl1 d1dfb11 d1fh5h1 d3g5xa1 d1tzi11  
d4dn3l1 d3zhka1 d2b1hh1 d2uyla1 d1f3dh1 d1nj9b1 d2agjh1 d2h1pl1  
d1q72h1 d8fabb1 d1ndmb1 d1rjca1 d4u6hb1 d3upca\_ d2fbj11 d1osph1  
d1tvda\_ d2cjh\_ d4fhbd1 d1bd2d1 d1rz7h1 d3nn8a\_ d1blna1 d1knoa1  
d1nfd1 d2bmk1 d1dq11\_ d1igy1 d1igf11 d12e8h1 d3utza1 d1nc2b1  
d1rihh1 d4mwfb1 d4jvpa1 d1mieh1 d1rhfa1 d1fgn11 d1sbsh1 d1lp9e1  
d1dn0a1 d4lqf11 d1iaih1 d1kgcd1 d1mh5b1 d1gpol1 d2g60h3 d1f8t11  
d2jixd1 d4grwh\_ d1fo0b\_ d1bfob1 d1axsa1 d1u9ka\_ d1nmbh\_ d1h8na1  
d1h8na2 d1jguh1 d4eura1 d3sdy11 d35c8h1 d1w72l1 d1mvub\_ d1i9rh1  
d1ob1a1 d4wenb\_ d1yeeh1 d3ietc1 d1f58h1 d1ad0b1 d1mqk1\_ d1nbvh1  
d4b50a\_ d3r8bb\_ d1baf11 d1mamh1 d4rgne1 d2gsgb\_ d35c8l1 d1bafh1  
d1ai1h1 d2pcpa1 d2fath1 d2x1pa\_ d1orsb1 d1libg11 d1shma\_ d1a2yb\_  
d1u0qa\_ d2coqa\_ d1hilb1 d1qfwi\_ d1jv5b\_ d1fn4b1 d5e0qa\_ d1nsnh1  
d1plg11 d4ocx11 d1kb5h1 d1rzfh1 d1pg7x1 d2fx7h1 d2oi9c\_ d1l7i11  
d3eyva1 d1d5i11 d4ffyl\_ d1a6wh\_ d1lac6a\_ d3dvfa\_ d1nfd1 d1mimh1  
d1ri8a1 d1jhlh\_ d3dura\_ d1fskb1 d1f97a1 d3so3b1 d2ak4d1 d1lp9f1  
d4z7wf1 d1l7th1 d4y5ya\_ d4x7ec1 d1emth1 d1ikf11 d1nlbh1 d4uta11  
d1bjma1 d1eapb1 d1u6ah1 d2dtgd1 d1kj2b\_ d1xeda1 d1c1eh1 d1fgvh\_  
d2bnub1 d2fb4h1 d2dtgb1 d1ktrh\_ d1jpth1 d1qkz11 d4hepg\_ d2atpb1  
d1flrh1 d2hrpl1 d1mvfa\_ d1iaim1 d3k80a1 d2jb5h1 d3zkxc\_ d4grwe\_  
d1it9h1 d1rhhb1 d3w9ec\_ d1e4wh1 d1sy6h1 d2j6eh1 d3qxta\_ d1jglh1  
d1p7ka1 d1tzhb1 d4n8pa1 d1gaf11 d2jelh1 d1wioa2 d4i0cc1 d1cicb1  
d1lmka2 d1lmka1 d1iqwh1 d1orqb1 d1ejoh1 d1jnlh1 d4zg1a\_ d43c9b\_  
d1ggb11 d1wejh1 d3q6fa1 d1f3dj1 d3c6la1 d1bqlh1 d3p9wb\_ d1a3r11  
d1h0db1 d2uzil\_ d1eo8l1 d1qfw1\_ d1n7ml1 d1igja1 d1c5ch1 d2a9mh\_  
d1rmfh1 d1fj1b1 d4heme\_ d1ccza1 d1a5fh1 d1ogad1 d1dlfh\_ d1qa9b\_  
d1vge11 d3qskb\_ d1sjxa\_ d4ozfg1 d1sq2n\_ d1qd0a\_ d1kcvh1 d1c5db1  
d3qcull1 d8faba1 d3bn9d1 d1mjuh1 d4y8dc\_ d7fabh1 d3dvgb1 d1lo0l1  
d1a6tb1 d1gigh1 d1kcrh1 d2hwz11 d1yjdc1 d3clfl1 d4krna\_ d1d17l\_  
d1e6ol1 d1mexh1 d3r0ma\_ d4kkna\_ d1fns11 d1oaqh\_ d1rzia1 d1ucbh1  
d1ncw11 d4b41a\_ d1nfd1 d2mpah1 d2d7t11 d4grwf\_ d4b5ea\_ d1lk3h1  
d3u79a\_ d4u3xa\_ d1ghf11 d1bvkb\_ d1mcww1 d1b88a\_ d1jrhh1 d32c2b1  
d4wemb\_ d1dsfh\_ d1op3h1 d1ce111 d1iqda1 d1qoka1 d1qoka2 d1qfuh1  
d2crya1 d1ay1h1 d1oaql\_ d3ab0b\_ d1rur11 d1t4kb1 d1bz7b1 d1n0xh1  
d1for11 d1ucb11 d4w6yb\_ d43c9a\_ d2aabl1 d1tzia1 d4n1ca\_ d1k6qh1  
d3g9ab\_ d4tvsa1 d1igmh\_ d1pz5b1 d3dx9a1 d3wxwh\_ d1nakh1 d1kcul1  
d3eaka\_ d4qlra1 d1cr9l1 d1d9ka\_ d1f4x11 d1deea1 d2i27n2 d1c12a1  
d2orb11 d1j8hd1 d1mcp11 d1c5da1 d1kenh1 d1bd2e1 d1h5ba\_ d4x7fc1



d3upaa\_ d1t3fa1 d1indh1 d2dtgc1 d4hc1l11 d1zv5a1 d4wgvb\_ d1uwgl1  
d4f37k1 d1aqkh1 d1vesa\_ d3zkqd\_ d1fptl1 d1lo4l1 d1knob1 d3rrqa\_  
d1ct8b1 d4orz\_ d1mlbb1 d4hgkc1 d1dqd11 d1bogb1 d4ozhe1 d1dr9a1  
d1i7za1 d1dn0b1 d1kell1 d1rzib1 d1ypzf1 d1wtla\_ d1hkfa\_ d1fail1  
d1figh1 d2vyre\_ d1sjva\_ d1ohqa\_ d1bfoa1 d1pkqb1 d1mjul1 d1b4jl1  
d1nsn11 d2arjb1 d1p4bh\_ d4aj0a\_ d3nn8b\_ d2rcja1 d1f2xk\_ d4v1dd\_  
d1adqh1 d2eksa\_ d4k3ga\_ d1jfqh1 d1uweh1 d1frgh1 d4gftb\_ d1uz8b1  
d4nlea\_ d1bm3l1 d1clol1 d3mcka1 d2vq1a1 d1ae6h1 d4aq1b1 d1uj3b1  
d1nbqa1 d1fh5l1 d2ck0l1 d2ywza\_ d1q72l1 d4nxbx\_ d1hila1 d4hz1b1  
d2j88l1 d1zmya1 d1cd0a\_ d1a4ka1 d1pskl1 d1a0qh1 d4krmb\_ d1ncbh1  
d2fbjh1 d1j8he1 d1i3ua\_ d1cf8l1 d1fe8h1 d2p1ya1 d1eeqa\_ d2x89a\_  
d1ol0a\_ d2r0lh1 d1ub5a1 d1dfbh1 d3eyvb1 d4jdvb1 d4p2cg\_ d2gsia1  
d2agj11 d1u3ha1 d2h1ph1 d1rihl1 d1fskc1 d1boga1 d2a77l1 d1ospl1  
d1qfoa\_ d3dwta\_ d2fx7l1 d1rz7l1 d3stba1 d1pkqa1 d1b6da1 d1dzba2  
d1dzba1 d1kj2a\_ d4l1ha\_ d1rzgb1 d1dq1h\_ d12e8l1 d1miel1 d1jmaa\_  
d1sbs11 d1fgnh1 d1f58l1 d1mqkh\_ d1ndgb1 d3qegl1 d1iail1 d2aw2a1  
d1tqbc1 d3fo2a1 d4dkaa\_ d1f8th1 d2g60l1 d2ywy\_ d1uj3a1 d1yc7a\_  
d3bd3a\_ d4w6xb1 d1nmb1\_ d1i8ka\_ d1rjlb1 d1ypze1 d1p7kb1 d1kxqe\_  
d1gpoh1 d2z4qa1 d1w72h1 d1i9rl1 d4qgya1 d4xt1c\_ d2qqnh1 d1cica1  
d3c08h1 d2cd0a\_ d2bdnh1 d1hnga1 d1mam11 d1nldh1 d1cr9h1 d4lcih1  
d3bkyh1 d3qg7l1 d1ai1l1 d1kxvc\_ d4iosd\_ d1l7ih1 d2x1qa\_ d1ub6b1  
d3k74b\_ d1ibgh1 d1teth1 d1igya1 d1hxma1 d2x6ma\_ d2e7la\_ d5e03a\_  
d1qfwm\_ d2r0kh1 d1igjb1 d1rurh1 d1plgh1 d1mj8h1 d1yuhb1 d3fmg11  
d1rzfl1 d1emt11 d1ad9b1 d1igtb1 d1nlbl1 d1d5ih1 d3k7ua\_ d4ffyh\_  
d1bwwa\_ d3dvga1 d1a6ta1 d1fgvl\_ d4qxgl1 d1mim11 d1jhl1\_ d2hffb1  
d2hh0l1 d1qkzh1 d1l7tl1 d1afvh1 d1iaii1 d2cjuh\_ d1um5h1 d2ghwb2  
d2ghwb1 d1kgce1 d2fgwh1 d1ikfh1 d1dvfd\_ d2i24n1 d2xtjb\_ d1za3b1  
d2yc1a\_ d2hh0h1 d2x1oa\_ d1bvka\_ d1rjla1 d5e7ba1 d1igta1 d1il1b1  
d2fb4l1 d1mvua\_ d1jpt11 d32c2a1 d1fvca\_ d1iqdb1 d2hrph1 d2p4ab\_  
d4qo1a\_ d1p2cb1 d1wt5c\_ d1t4ka1 d5c1mb\_ d1it9l1 d1bz7a1 d1b2wh1  
d1e4wl1 d1jnl11 d1yedb1 d1za6b1 d3u7aa\_ d1igfh1 d3gnml1 d1orsa1  
d1wejl1 d1a2ya\_ d1hxmb1 d1gafh1 d2j4wh1 d1pz5a1 d1j05a\_ d1a3rh1  
d4fq1l1 d1qfwh\_ d1eo8h1 d1n7mh1 d4s11a\_ d1kegh1 d5da4a\_ d1iqwl1  
d3whxb1 d1vgeh1 d1deeb1 d1c12b1 d1t2ql1 d1ad9a1 d3gsnb1 d3b2uc1  
d1ggbh1 d1t3fb1 d1nakl1 d4ocmc\_ d1lila1 d2v7hb3 d2esve1 d1mcoh1  
d2qr0b1 d2q3aa\_ d1ct8a1 d1kcr11 d2pxyb\_ d2uzih\_ d5c3ld\_ d3durb\_  
d1c5cl1 d2ak4e1 d1dl7h\_ d1xiwd\_ d1mlba1 d1rmfl1 d1i7zb1 d1dlfl\_  
d2xa3a\_ d5bq7b1 d1dqqb1 d3h42l1 d1legjh1 d1kcv11 d1fe8l1 d2j6el1  
d1f3rb2 d1l1k3l1 d1sm3h1 d1q0xh1 d1ghfh1 d7fabl1 d1igch1 d1lo0h1  
d4idla\_ d5c2b1\_ d1jrh11 d1il1a1 d3zhda1 d4kfzc\_ d1b0wa\_ d1e6oh1  
d1mex11 d4krpb\_ d1fnsh1 d1ncwh1 d4hgma\_ d4eigb1 d4rzca\_ d2mpa11  
d4y5xa\_ d5en2b1 d3lrga1 d4ej1c1 d1rhha1 d1j05b\_ d1forh1 d1q9wb1  
d2wzpd\_ d2aq2a1 d1h0da1 d3revb1 d2ij0c1 d1tzha1 d4m7jl1 d1k6ql1  
d3b9kc1 d1igml\_ d3qeua1 d1dsfl\_ d1celh1 d1kcu11 d1zvha1 d1zvoa1

d1tqbb1 d1ay1l1 d2qsc11 d2cgrh1 d1n10h1 d1ken11 d3eo0a1 d4n9ob1  
d1n0x11 d3k1kc\_ d1c4qa\_ d1prtcl d2wv6d\_ d1prtf\_ d1ltrd\_ d4l63b1  
d1prtd\_ d1t10f\_ d2bosa\_ d1prtb1 d3chbd\_ d2aq2b1 d1ck1a1 d1enf1  
d1i4pa1 d1v1oa1 d1et9a1 d1esfa1 d2g9hd1 d4ohja1 d1klud1 d1bxta1  
d1eu3a1 d1ty0a1 d1fnua1 d2qaln1 d2cqva1 d1fhga\_ d2k1ma\_ d2dl2a1  
d1biha3 d1biha1 d1biha4 d3qp3a1 d1g1ca\_ d1gxea\_ d1cvsc2 d1cvsc1  
d1xmwa2 d1m4ka2 d2otpa2 d1biha2 d1rhfa2 d2fcba2 d2fcba1 d1wwbx\_  
d1gsma2 d1epfa1 d1epfa2 d2dava1 d1waaa\_ d1f97a2 d1x44a1 d1vcaa2  
d1fnla2 d1fnla1 d3b5ha2 d3h8na2 d3h8na1 d1jbj1a1 d1jbj2a1 d1pd6a\_  
d1f2qa2 d1f2qa1 d3cx2a\_ d1nbqa2 d3b5ha1 d1n26a1 d1xiwb\_ d1xaua\_  
d1fltx\_ d2ifga1 d1olla1 d1olla2 d1cs6a4 d1cs6a3 d1cs6a2 d1cs6a1  
d2gw5a2 d1sy6a1 d1xiwa\_ d1lucta2 d1lucta1 d1ry7b2 d1gl4b\_ d1qz1a3  
d1olza1 d2c9aa1 d1wwca\_

**Family-96 (g.3.6.2)**

**Positive dataset contains 6 protein sequences.**

d1y29a\_ d1v7fa\_ d2jtba\_ d2a2va\_ d2mpqa\_ d2mxoa1

**Negative dataset contains 4073 protein sequences.**

d1m32a\_ d1libja\_ d1c7na\_ d1iuga\_ d4q75a\_ d2bkwa1 d1t3ia\_ d1qz9a\_  
d1jf9a\_ d1leg5a\_ d1p3wa\_ d3kgwa\_ d1c11a\_ d2ctza1 d1vjoa\_ d2rfva\_  
d1gc0a\_ d1cs1a\_ d1d2fa\_ d2ch1a1 d1qgna\_ d1pffa\_ d1elua\_ d1ax4a\_  
d2v1pa1 d2ez1a\_ d1u08a\_ d1lc5a\_ d1b5pa\_ d2ay1a\_ d1bw0a\_ d3pd6a\_  
d7aata\_ d2csta\_ d1j32a\_ d1fg7a\_ d4wlha\_ d1o4sa\_ d1v2da\_ d1gdea\_  
d1m6sa\_ d1v72a1 d1svva\_ d1ajsa\_ d1wsta1 d2f8ja2 d1lk9a\_ d1vp4a1  
d1xi9a1 d2gb3a1 d3i2ka1 d1lnsa3 d1mpxa2 d1xkta1 d2hfka\_ d1jmkc\_  
d5d3ka\_ d2b5aa1 d2ofya1 d4mcxa\_ d2xi8a\_ d2icta\_ d2bnma1 d2ppxa1  
d1y7ya1 d1sefa\_ d1sfna\_ d1sq4a\_ d1t61c1 d1f56a\_ d1bypa\_ d1azca\_  
d1ws8a\_ d3u25a\_ d1cuoa\_ d1id2a\_ d1rkra\_ d2iaac\_ d4dp1x\_ d1nwp1a\_  
d2gima\_ d2i7sa\_ d1qhqa\_ d1hfua2 d1kbva1 d1kbva2 d1sdda1 d1sdda2  
d1gyca1 d1gyca2 d1mzya1 d2bw4a1 d1aoza1 d1aoza3 d1aoza2 d1kyaa2  
d1kyaa3 d1kyaa1 d1mzya2 d4e9sa1 d1sddb1 d1sddb2 d1hfua1 d1hfua3  
d1oela2 d1oela1 d1v10a2 d1v10a3 d1v10a1 d1rypd\_ d1irua\_ d1rypc\_  
d3unfk\_ d1rypa\_ d1j2pa\_ d1irui\_ d1j2qh\_ d3unfh\_ d1m4ya\_ d1rypb\_  
d1irul\_ d1irug\_ d1iru2\_ d1q5rh\_ d1rypg\_ d1g3ka\_ d1iruf\_ d1q5qa\_  
d1irub\_ d1ryph\_ d3ty6a\_ d1iruj\_ d1iruk\_ d1rype\_ d1irud\_ d1irue\_  
d3mi01\_ d1rypf\_ d1iruh\_ d2z3ba\_ d1iruc\_ d3mka2\_ d1iru1\_ d2cfba1  
d1dfoa\_ d1o69a\_ d1bj4a\_ d3k28a\_ d2bwpa\_ d3lg0a\_ d2fnua\_ d3ou5a\_  
d1z7da1 d1b9ha\_ d1iaya\_ d4msoa\_ d1bs0a\_ d1s0aa\_ d1sffa\_ d3tqxa\_  
d1mdoa\_ d3qboa\_ d3pgya\_ d1bjna\_ d2dkja\_ d1ejia\_ d1vefa1 d4wxga\_  
d3bs8a\_ d3gbxa1 d1w23a\_ d4qgna\_ d1vr3a1 d1adqa1 d1fnga1 d1uvqb1  
d1zs8a1 d2vola1 d2vola2 d1mfb12 d2jelh2 d1uwel2 d3qq4b1 d1kjob\_  
d1k5na1 d1osph2 d4odh12 d1ow0a1 d1ow0a2 d1bfob2 d3l9ra2 d3jtth1  
d2fath2 d4elkb2 d1fn4b2 d2xfxb\_ d1pg7x2 d1cqka\_ d4k71b2 d1lk2a1  
d1eapb2 d4lfhg2 d1i4fa1 d2nw2a2 d1kfah2 d1mhca1 d1h3ua1 d1wejh2  
d1h0db2 d1a5fh2 d1kcvh2 d1mjuh2 d1qqda1 d1kcrh2 d1k8ia1 d3huja2

d2nnab1 d1nfd2 d3mffb2 d1s9va1 d1lk3h2 d1q0x12 d1fv1b1 d1neza1  
d4rfeb2 d1r3ha1 d1a6tb2 d1kjva1 d1pz5b2 d1onqa1 d2bc4a2 d1de4a1  
d1k8da1 d1tcra2 d1dn0b2 d1nfde2 d2xwtb2 d1bfoa2 d1mexh2 d1iakb1  
d1ypzf2 d4f7ea2 d1q7212 d2fbjh2 d1fe8h2 d1clzh2 d1fngb1 d1uvqa1  
d1vgka1 d1c16a1 d4j12a2 d4x99b2 d1igtb3 d1je6a1 d1q72h2 d1nldh2  
d1teth2 d2hmic2 d1i1ca2 d1i1ca1 d1k8ib1 d1q0yh2 d1kfa12 d3frua1  
d1pg7w2 d1u58a1 d1igyb4 d1igyb3 d1hyrc1 d1klub1 d1deeb2 d1c12b2  
d2bc4b2 d1kcv12 d3wn5b1 d1lk2b\_ d1lk312 d1mju12 d1sm3h2 d1q0xh2  
d1zvsa1 d1ydp1 d1u8ib2 d1ypze2 d1kcu12 d1zx5a1 d1qwra\_ d2ph1a2  
d2ph1a1 d1fxza2 d1fxza1 d1lrha\_ d1uija1 g1dgw.1 d2v09a\_ d1uika2  
d1uika1 d1dgwa\_ d1nepa\_ d1ds6b\_ d1fstb\_ d1ex0a1 d1g0da1 d1ku5a\_  
d1b67a\_ d1tafa\_ d1bh9b\_ d1jfib\_ d1q9ca\_ d1h3ob\_ d2byka1 d1n1ja\_  
d4g92b\_ d1bh9a\_ d1jfia\_ d1h3oa\_ d2bykb1 d1n1jb\_ d1k9ua\_ d2opoa\_  
d1r0ka3 d1vkoa2 d1vm6a2 d3qvsa2 d1gr0a2 d1p1ja2 d2ovga\_ d1sq8a\_  
d1rzsa\_ d3kz3a\_ d3orca\_ d3gpdg2 d2q49a2 d2g17a2 d2cvoa2 d2czca1  
d3pwka2 d1obfo2 d1i32a2 d1zyao2 d2pkqo2 d1b7go2 d2hjsa2 d1cf2o2  
d1vkna2 d1nvmb2 d41t9a1 d3tc7a1 d3hoja\_ d1i4na\_ d3vnda\_ d3n18a1  
d1geqa\_ d3nav1 d1v5xa\_ d4a2ra1 d3tc6a1 d1ujpa\_ d4ijba\_ d1xcfa\_  
d1rd5a\_ d1qopa\_ d3b5va\_ d2msya\_ d2djoa1 d2r5za\_ d1au7a1 d1f43a\_  
d2lmda1 d1akhb\_ d1s7ea1 d3nara\_ d1zq3p1 d2craa1 d1mija\_ d4uuta\_  
d3a01a\_ d1x58a1 d3rka1 d3cmya1 d2cqxa1 d2da6a1 d1e3oc1 d1fjla\_  
d1ig7a\_ d1x41a1 d1wh7a1 d1gt0c1 d2mw8a\_ d1lfup\_ d1x2ma1 d1b72a\_  
d1wi3a1 d1jgga\_ d1wjha1 d1x2na1 d1mnmc\_ d2cuea1 d3k2aa\_ d2hosa\_  
d2jwta2 d1pufa\_ d1octr1 d2hi3a\_ d1b8ia\_ d4j19a\_ d3l1nqa\_ d1wh5a1  
d1b8ib\_ d1fexa\_ d2cqra1 d1guua\_ d1ug2a1 d2cqqa1 d2ajea1 d4a69c\_  
d2crga1 d2iw5b1 d1xc5a1 d1ofcx1 d2cu7a1 d1wgxa1 d2cjja1 d2ckxa1  
d1gvda\_ d1hcra\_ d1tc3c\_ d1u78a2 d6paxa1 d6paxa2 d1k78a2 d1xg1a1  
d1hlva1 d1hlva2 d1iufa2 d1iufa1 d2iu5a1 d1zk8a1 d2g7sa1 d2fd5a1  
d2np5a1 d1z0xa1 d2id6a1 d2d6ya1 d2i10a1 d2oi8a1 d3c07a1 d2ns7a1  
d2fq4a1 d2yvea1 d1t33a1 d2o7ta1 d1rcta1 d2np3b1 d2g7ga1 d2gena1  
d2fbqa1 d2g71a1 d2gfna1 d2g3ba1 d2jj7a1 d2hyja1 d1sgma1 d1ui5a1  
d2hkua1 d2id3a1 d4jyka1 d1b10a1 d1b10a2 d1d5ya1 d3lv8a\_ d1s3ga1  
d1zaka1 d1s4qa\_ d3tvta2 d1uf9a\_ d1khta\_ d1ckea\_ d1losna\_ d1p5zb\_  
d4tmka\_ d3cm0a\_ d1tmka\_ d1jaga\_ d3h86a\_ d1t0hb\_ d1nn5a\_ d2h92a\_  
d3kb2a1 d2c95a1 d1yj5a2 d1kgda\_ d1ly1a\_ d2ak3a1 d1vyva2 d1deka\_  
d2grja1 d1p3ja1 d1y63a\_ d1e4ya1 d3iija1 d1lvga\_ d1nksa\_ d1vyua2  
d4e22a\_ d1qf9a\_ d1jjva\_ d1q3ta\_ d1ki9a\_ d1lw7a2 d1teva\_ d1kjwa2  
d1gsia\_ d2iyva2 d1viaa\_ d1e6ca\_ d1g3ma\_ d1j99a\_ d1t8ta1 d1nsta\_  
d1fmja\_ d1zrha\_ d1ls6a\_ d2a3ra\_ d1aqua\_ d2zptx\_ d3ckla\_ d1texas\_  
d1q44a\_ d2gwha\_ d1odfa\_ d1uj2a\_ d4gi7a\_ d2jeoa1 d1z0ja1 d3umra2  
d3gj0a1 d2gaoa1 d1yzga1 d1x3sa1 d1g7sa4 d1puja\_ d1udxa2 d1kk1a3  
d2o52a\_ d1jwyb\_ d1zcaa2 d1zcba2 d2fv8a1 d2cjwa\_ d3dz8a1 d1xzpa2  
d1vg8a\_ d4qxaa\_ d2ew1a1 d1x1ra1 d2bcgy\_ d3doea1 d3cona\_ d3rega\_  
d3wyga\_ d1upta\_ d2b6ha1 d1zd9a1 d1lnza2 d1r5ba3 d1n0ua2 d1r2qa\_

d2f9la1 d2rhda\_ d3q3jb\_ d3q85a\_ d1efma1 d1r8qa\_ d2gf9a1 d2akab1  
d1ek0a\_ d1z08a1 d2gcoa1 d2dyla2 d4g01b\_ d2cxa1 d1svia\_ d3q72a\_  
d1ni3a1 d4ac9a4 d2erxa1 d2bmea\_ d1wxqa1 d2gf0a1 d4ldja1 d1zunb3  
d1d5ca\_ d4lv5b\_ d1efca3 d1kmqa\_ d2g6ba1 d3lrpa\_ d1tada2 d2y8ea\_  
d4rd4a1 d1z06a1 d2heia\_ d3a58b\_ d1u0la2 d1d2ea3 d1zj6a1 d2ocba\_  
d3rwoa\_ d1mr3f\_ d2e9sa1 d4u5xa1 d2iwra\_ d2fn4a1 d3bwdd\_ d2nzja1  
d2atva1 d2ksqa\_ d3l43a\_ d1mkya2 d1mkya1 d1wmsa\_ d1jnva3 d2rmka\_  
d1f6ba\_ d1f60a3 d1gota2 d1jala1 d2fh5b1 d1g16a\_ d2wblc\_ d1m7ba\_  
d1wf3a1 d1f5na2 d1t9ha2 d1z6xa1 d1z0aa1 d2fg5a1 d2a5ja1 d2bcjq2  
d1s0ua3 d1ky3a\_ d4y0va\_ d4lhwa\_ d2qmea1 d2atxa1 d1legaa1 d1ryha\_  
d1moza\_ d1nrjb\_ d2erya1 d3bfka\_ d1puia\_ d1fzqa\_ d3j3az1 d3t5ga\_  
d1shza2 d3defa\_ d2f7sa1 d3raba\_ d3tsoa\_ d3aq4a\_ d2a17a1 d3sfva1  
d3bc1a\_ d2ncda\_ d1sdma\_ d3h4sa1 d2heha\_ d2grya\_ g3kin.1 d1kk8a2  
d1br2a2 d1goja\_ d2mysa2 d1lkxa\_ d3t0qa\_ d4db1a1 d3gbja\_ d1ry6a\_  
d1v8ka\_ d1kv9a1 d1k8ka2 d1k8ka1 d3uleb1 d3i33a2 d3i33a1 d1bupa1  
d1dkgd2 d1dkgd1 d4ci6a2 d1jcfa1 d4a2ba2 d2fxua1 d1yaga2 d1yaga1  
d4cbua2 d1bupa2 d1g99a2 d2e1za2 d2e1za1 d1saza1 d1saza2 d1liqca1  
d1eb7a2 d1eb7a1 d1nmla2 d1nmla1 d1hroa\_ d4gedb\_ d3zooa\_ d1mz4a\_  
d1gu2a\_ d1f1fa\_ d1dvva\_ d1c6ra\_ d1c75a\_ d1e29a\_ d1gdva\_ d1h32b\_  
d1co6a\_ d2bh4x\_ d2aiua\_ d5cytr\_ d1jdl\_ d1i8oa\_ d2zboa\_ d3dmia\_  
d1ls9a\_ d1wvec\_ d2yk3a\_ d3ph2b\_ d1dw0a\_ d5aura\_ d1ql3a\_ d1qn2a\_  
d1f1ca\_ d4zzva\_ d2xspa\_ d1eg1a\_ d4v20a\_ d1ojja\_ d4ipma1 d1gpia\_  
d4csia\_ d3pfza\_ d3ovwa\_ d2yoka\_ d2nqya\_ d1h4ga\_ d1hixa\_ d1oa2a\_  
d1olra\_ d3b7ma\_ d4h7ma1 d3wp3a\_ d2vgda\_ d1ligoa\_ d3zsea\_ d2nlra\_  
d3wx5a\_ d1oa3a\_ d1pvxa\_ d1m4wa\_ d1f5ja\_ d1ks5a\_ d4ixla1 d1evsa\_  
d1cnt1\_ d1pvhb\_ d1z7ca\_ d1huwa\_ d1bgea\_ d1rhga\_ d1f6fa\_ d1f45b\_  
d1l1rb\_ d1axia\_ d4x51a\_ d4ypgc1 d3oq3a\_ d1lqsl\_ d1n1fa\_ d1aula\_  
d1wu3i\_ d3bes1\_ d3ux9a\_ d1v8fa\_ d2ejca\_ d3muea1 d1lihoa\_ d3q12a1  
d4dnxa2 d1v47a2 d1g8fa2 d1jhda2 d1x6va2 d2e17a\_ d1liq0a2 d1irxa2  
d1r6ta2 d1ivsa4 d2cyba\_ d1rqga2 d1j09a2 d2yxna\_ d1f7ua2 d1h3fa1  
d1ffya3 d2g36a1 d1nzja\_ d1jila\_ d1n3la\_ d1i6la\_ d1pfva2 d1h3na3  
d3n9ia\_ d3sz3a1 d1xd3a\_ d3ifwa\_ d3sw2a\_ d1moxc\_ d1dx5i3 d1ledmb\_  
d1aut12 d1aut11 d1nqlb\_ d1dva11 d1szba2 d1kigl\_ d2y5fl\_ d1ijqa2  
d1gk5a\_ d1g1sa2 d1nt0a3 d1xdtr\_ d1lmja2 d1lmja1 d1nzia2 d2wphe\_  
d1klil\_ d1pfx12 d1pfx11 d1p9ja\_ d1g1ta2 d1f7ea\_ d4yzub\_ d1m1xb4  
d1m1xb5 d2y5ia\_ d1qlsa\_ d1psra\_ d3n22a\_ d2egda\_ d4ggfc\_ d2wcea\_  
d2luca\_ d4aqia\_ d3nsia\_ d2lp3a\_ d1j55a\_ d1a4pa\_ d1nsha\_ d1pvaa\_  
d3fs7a\_ d2pvba\_ d1ttxa\_ d1rwya\_ d2kyfa\_ d1rk9a\_ d1a75a\_ d1exra\_  
d1tiza1 d1nyaa\_ d1g8ia\_ d1ggwa\_ d1wdcc\_ d3fwba\_ d1ggza\_ d2o5ga\_  
d1ctaa\_ d1m45a\_ d3i5gc\_ d1s18a\_ d1fpwa\_ d2scpa\_ d2roaa\_ d4aqra\_  
d3pn7b\_ d1br1b\_ d2mysb\_ d1s6ca\_ d1bjfa\_ d2obha\_ d1jfka\_ d1jfoa\_  
d1qv0a\_ d1lkja\_ d2mlfc\_ d2m97a\_ d2d8na\_ d4by5a\_ d4nqga\_ d1wdcb\_  
d2mysc\_ d1j7qa\_ d1s6ia\_ d1uhka2 d1r2ua\_ d1dtla\_ d3kf9a\_ d3pn7c\_  
d1qjta\_ d1fi6a\_ d5d67d\_ d1tuza\_ d1h8ba\_ d1leg3a1 d1leg3a2 d2zkmx1

d1snla\_ d1gjya\_ d1y1xa\_ d1hqva\_ d1dvia\_ d1df0a1 d1qxp2 d4usla\_  
d1k94a\_ d1wkya2 d1uuqa\_ d3wh9a\_ d4mlra\_ d1xyza\_ d4xuya\_ d2je8a5  
d4bf7a1 d3cuia\_ d1ur4a\_ d1qw9a2 d1odza\_ d2vzsa5 d1bqca\_ d2x2ya1  
d1hjqa\_ d1qnra\_ d4y7ea1 d1vjza\_ d4k68a\_ d2v3ga\_ d4hpga\_ d1nofa2  
d1nq6a\_ d1h4pa\_ d1aq0a\_ d3ziza\_ d4bs0a\_ d1ecea\_ d1h1na\_ d1ta3b\_  
d1w91a2 d1i1wa\_ d1uhva2 d1us3a2 d1legza\_ d7a3ha\_ d1tvna1 d3nyda1  
d1ghsa\_ d2cyga1 d4xv0a\_ d2c8na2 d1w32a\_ d3emca\_ d1v6ya1 d1foba\_  
d2uwfa1 d2fgla\_ d3niya1 d2c0ha1 d1rh9a1 d1yq2a5 d1szna2 d1fa2a\_  
d1pama4 d5do8a1 d1ea9c3 d1hx0a2 d2fhfa5 d1qhoa4 d1avaa2 d1m53a2  
d4m8ua1 d2gjpa2 d1lwha2 d4howa1 d1ktba2 d1j0ha3 d3vm5a1 d2x1ia\_  
d1wzaa2 d1uasa2 d2diea1 d1mxga2 d1ht6a2 d1eswa\_ d1liv8a2 d5cpsa\_  
d1ud2a2 d1zjaa1 d3gbea1 d1kwga2 d1wdpa\_ d1gcya2 d1g5aa2 d1hvxa2  
d3dhpa2 d2bhua3 d4do4a1 d3qgva1 d1e43a2 d1g94a2 d2d3na2 d1gjwa2  
d1gvia3 d1x1na1 d1r7aa2 d1tz7a1 d2x42a1 d1tr9a1 d3abza1 d4c7ga2  
d2gjxa1 d1jaka1 d1yhta1 d4toqa\_ d1wb0a1 d1w9pa1 d1eoka\_ d1itxa1  
d1kfwal d1goia2 d2gsja\_ d1hjxa1 d1jnda1 d1vf8a1 d3wdpp1 d3wq5a\_  
d1gnxa\_ d4gxpa\_ d4hz8a\_ d1e4mm\_ d3aiua\_ d1wcca1 d1qvba\_ d3ahxa\_  
d1v02a\_ d2dgaa\_ d1pbga\_ d1vffa1 d1qoxa\_ d4ha4a\_ d1mixa2 d1e5wa2  
d1j19a2 d1isna2 d2a16b2 d3syxa1 d1mkea1 d2p8va\_ d1xoda1 d1evha\_  
d1qc6a\_ d1egxa\_ d1b9ra\_ d1offa\_ d1frra\_ d3wcqa\_ d1e9ma\_ d1l5pa\_  
d1wria\_ d1i7ha\_ d3av8a\_ d1czpa\_ d1rfka\_ d3p1ma1 d3b2ga\_ d2bt6a2  
d1wgqa1 d1v89a1 d2coda1 d1zc3b\_ d1wg7a1 d1u5ea1 d1v61a1 d2coca1  
d2ys1a1 d1v5pa1 d1ntya2 d1wjma1 d1wi1a1 d1u29a\_ d1xx0a1 d1unqa\_  
d2zkmx3 d1fhoa\_ d1v88a1 d2adza1 d1x1fa1 d1p6sa\_ d2coaa1 d1btka\_  
d1v5ma1 d1faoa\_ d2x18a\_ d1dyna\_ d1x1ga1 d4kaxb\_ d2j59m1 d1xcga2  
d1txda2 d1u5da1 d1dbha2 d1wlha\_ d1upqa\_ d1v5ua1 d1foea2 d2fjla1  
d1eaza\_ d2dfka2 d2cofa1 d1kz7a2 d9ldta1 d2ewda3 d1up7a1 d2dfda1  
d1s6ya1 d1vjta1 d1hyea1 d1t2da1 d1ojsa3 d1b8pa1 d1ldna1 d1hyha1  
d1civa1 d2a92a1 d1ez4a1 d1i0za1 d1y6ja1 d1gv0a1 d1ur5a1 d1llda1  
d1obba1 d1v8ba1 d1gdha1 d1l7da1 d2dlda1 d1mx3a1 d1ygya1 d1qp8a1  
d1li4a1 d1j4aa1 d2naca1 d1etob\_ d1umqa\_ d1kola2 d1qora2 d1jqba2  
d1vj0a2 d1cdoa2 d1gu7a2 d1d1ta2 d1xa0a2 d2dm6a2 d1jvba2 d1rjwa2  
d1llua2 d1h2ba2 d1tt7a2 d1piwa2 d1o89a2 d1iz0a2 d1e3ja2 d1yb5a2  
d1uufa2 d1vj1a2 d1e3ia2 d3gpdg1 d1vc2a1 d2nvwa1 d1u8fo1 d1ydwa1  
d1hdgo1 d2g17a1 d1cf2o1 d2czca2 d1r0ka2 d1obfo1 d2cvoa1 d1ebfa1  
d1h6da1 d1i32a1 d1zh8a1 d2q49a1 d1qkia1 d1j5pa4 d3pzra1 d1xeea1  
d1vkoa1 d1vm6a3 d3qvsa1 d2pkqo1 d1b7go1 d1gr0a1 d1p1ja1 d1lc0a1  
d3pwka1 d2hjsa1 d1zyao1 d1vkna1 d1tlt1a1 d1nvmb1 d3sjua\_ d3ojfa1  
d1xu9a1 d2jjya1 d1n7ha\_ d1y1pa1 d1h5qa\_ d1jtva\_ d4fs3a\_ d2bkaa1  
d1gy8a\_ d2c5aa1 d1ulsa\_ d1ooea\_ d2b69a1 d1y5ma1 d1spxa\_ d1aela\_  
d1bxka\_ d1ydea1 d1gega\_ d1hdoa\_ d1o5ia\_ d1e6ua\_ d1snya1 d2rhca\_  
d3zv4a\_ d5ceja\_ d2d1ya1 d1fjha\_ d3w8ea\_ d2fmua1 d1x1ta\_ d1rpna\_  
d3ay7a1 d1k2wa\_ d1eq2a\_ d2hrba1 d3ruaa\_ d2ew8a1 d4hwka\_ d1xgka\_  
d2bd0a1 d1yo6a1 d2a35a1 d2ntva\_ d1vl8a\_ d1hdca\_ d4bkua\_ d2ag5a1

d2q45a\_ d1nffa\_ d4iy1a\_ d1zbqa1 d1kewa\_ d1ek6a\_ d1ja9a\_ d2q46a2  
d1iy8a\_ d1cyda\_ d2ptga\_ d1hxha\_ d1uzma1 d3lyla\_ d4m89a\_ d3wyea\_  
d2b11a1 d1w6ua\_ d1sb8a\_ d2q2va\_ d4nr0a\_ d1e6wa\_ d2gasa\_ d3oiga1  
d2bgka1 d1mxha\_ d1vl0a1 d1rkxa\_ d1r6da\_ d1wmaa1 d1e7wa\_ d2c07a1  
d1xkqa\_ d3tzha\_ d1g0oa\_ d3lz6a\_ d1qyca\_ d1ledoa\_ d1gz6a\_ d1oc2a\_  
d1t2aa\_ d1zema1 d2xoxa\_ d1z45a2 d1geea\_ d1p33a\_ d3lt0a\_ d4e6pa\_  
d2wyua\_ d1db3a\_ d4q9na\_ d1xhla\_ d4o1ma\_ d1fmca\_ d2uvda\_ d2gdza1  
d1uaya\_ d2z1ma\_ d2o23a2 d2fr1a2 d2fr1a1 d1qsga\_ d1qyda\_ d4zjua\_  
d2a4ka1 d1yb1a\_ d1wvga1 d1yxma1 d3f4ba\_ d1mg5a\_ d1xg5a1 d1r55a1  
d3gboa\_ d1atla\_ d1kufa\_ d4q11a\_ d1quaa\_ d1yp1a\_ d1wnia\_ gly43.1  
d4ekfa\_ d2ckga\_ d1th0a\_ d2bkra\_ d1ex0a4 d1g0da4 d2f4ma1 d1x3za\_  
d2w0pa\_ d2diaa1 d2e9ia2 d2e9ja1 d2dj4a1 d2eeba1 d2diba1 d2dmba1  
d2dmca1 d2d7oa1 d2ee6a1 d2d7pa1 d2eeaa1 d2di8a1 d1wlha1 d2d7na1  
d2nqca\_ d2d7ma1 d2dica1 d3cnka\_ d2k3ta1 d2eeca1 d1qfha2 d2bp3a1  
d1v05a\_ d2ee9a1 d2eeda1 d2di9a1 d3ioqa\_ d1fh0a\_ d1o0ea\_ d1khqa\_  
d1m6da\_ d2cb5a\_ d1cs8a\_ g8pch.1 d1s4va\_ d2pnsa\_ d1vsna1 d1mira\_  
d1iwda\_ d2oula\_ d7pcka\_ d3bwka\_ d3bcna\_ d2p86a\_ d1pvja\_ d1pcia\_  
d1gece\_ d1deua\_ d4bs6a\_ d1xkga1 d1cqda\_ d2c0ya\_ d2bdza\_ d3p5ua\_  
d1zoya1 d1qo8a2 d1d4ca2 d1chua2 d1jnra2 d1kf6a2 d2jk6a2 d2jk6a1  
d1fecal d1fecal d1lpfa1 d1lpfa2 d1xhca1 d1xhca2 d1dxla2 d1dxla1  
d1gera2 d1m6ia2 d1onfa1 d1onfa2 d3lada2 d3lada1 d1w4xa1 d1w4xa2  
d1gesa2 d1mo9a1 d1xdia1 d1fl2a2 d1fl2a1 d1fcda1 d1fcda2 d1h6va2  
d1h6va1 d1mo9a2 d1gv4a2 d1gv4a1 d2gv8a2 d2gv8a1 d1aoga1 d1aoga2  
d1hyua1 d1ebda1 d1ebda2 d3dk9a1 d1q1ra2 d1q1ra1 d1gesa1 d1g4ma1  
d1g4ma2 d1ps9a2 d1o94a2 d1cjca1 d1reoa1 d1ju2a1 d2f5va1 d3c96a1  
d2gmha1 d1pj5a2 d1gpea1 d1o5wa1 d1n4wa1 d1k0ia1 d2dw4a2 d2ivda1  
d1seza1 d2voua1 d1kdga1 d1s5ja1 d2hbja2 d2igia\_ d1wlja\_ d1qhta1  
d4dlea1 d1tgoa1 d2f96a1 d3tr8a1 d3mxma\_ d1y97a1 d1w0ha\_ d1kfsa1  
d2py5a1 d1noya\_ d1d5aa1 d1yt3a3 d2guia\_ d3mwpal d4kb1a\_ d2d5ra1  
d2v76a\_ d1wj1a1 d1aqca\_ d1qqga1 d1ntva\_ d1n3ha\_ d4dbba\_ d3f0wa1  
d1p3ra\_ d1wgua1 d2cy4a1 d3hqca\_ d1wvha1 d1xr0b1 d1tq5a1 d3nvva1  
d1krha3 d2h88b1 d1t3qa2 d1kf6b2 d1zoyb1 d1jq4a\_ d1ffva2 d1dgja2  
d1rm6c2 d1r7ha\_ d1faaa\_ d1wika1 d1xfla\_ d1ttza1 d2f51a1 d1ti3a\_  
d1nhoa\_ d1sena\_ d2i4aa\_ d1ep7a\_ d1zmaa1 d1fo5a\_ d3lefa1 d3diea1  
d2yana1 d1z6na1 d1oaza\_ d3zywa1 d4aj8a\_ d1nm3a1 d4fiwa\_ d1wmja\_  
d4hs1a1 d1liloa\_ d1xwaa1 d1wjka1 d2vmla\_ d1fb6a\_ d1gh2a\_ d1h75a\_  
d1nw2a\_ d1kx5b\_ d3a6na\_ d4m6ba2 d2nqbd\_ d3wkjd\_ d2yfwe\_ d4h9na\_  
d5bnxa\_ d1kx5c\_ d3r45a\_ d1eqzb\_ d4jjnb\_ d1f66c\_ d1eqza\_ d4wnnb\_  
d1kx5a\_ d1u35c1 d2nqbc\_ d1kx5d\_ d3us3a3 d3us3a1 d2b5ea2 d2b5ea3  
d2b5ea1 d2b5ea4 d2kp1a1 d2kp2a1 d1hyua3 d1j08a1 d1j08a2 d1pd212  
d1nhya2 d2a2ra2 d1k0dd2 d1f2ea2 d1gsua2 d1f3ba2 d2fhea2 d2pvqa1  
d1tw9a2 d1oyja2 d1e6ba2 d1k0ma2 d3ik7a1 d4is0a1 d1r5aa2 d1jlva2  
d1m0ua2 d3gtub2 d1z9ha2 d1okta2 d1axda2 d2gsra2 d1tu7a2 d1k3ya2  
d1zgma1 d1b48a2 d1gnwa2 d1gwca2 d2gsta2 d1glqa2 d1oe8a2 d1pn9a2

d1v2aa2 d1fw1a2 d1duga2 d3vrda1 d3vrda2 d1fcdc2 d1fcdc1 d1h1oa2  
d1h1oa1 d1m70a1 d1a0rp\_ d1lig8a1 d1lczan2 d1lczan3 d1lczan1 d1lig8a2  
d1lczan4 d1bg3a4 d1bg3a3 d1bg3a2 d1lnpya1 d3t4ea2 d1a4ia1 d1o0sa1  
d2hk9a2 d2egga2 d1b26a1 d1bvua1 d1lgq2a1 d1c1da1 d1leha1 d1gtma1  
d1euza1 d3dona2 d1edza1 d1gpja2 d1vi2a1 d1p77a1 d1nyta1 d1b0aa1  
d1vl6a1 d1v91a1 d1lux8a\_ d1dlya\_ d4i0va\_ d2bkma\_ d2bmma\_ d1qqya\_  
d1gd6a\_ d1f6ra\_ d1livma\_ d2gv0a\_ d1iiza\_ d2z2fa\_ d1j8xa\_ d1ghla\_  
d1b9oa\_ d1741a\_ d1691a\_ d2o4wa\_ d1p37a\_ d1k28a3 d1xjta1 d1jtma\_  
d2f2qa\_ d4e97a1 d1iknc\_ d3brda1 d1p7hl1 d1oy3c\_ d1imhc1 d1gjia1  
d1zk9a1 d2cxka1 d2pjsa1 d1k11a\_ d2i7ra1 d1ecsa\_ d1xqaa1 d5cj3a1  
d1npba\_ d1jifa\_ d2p7oa\_ d1nkia\_ d1mpya2 d1kw3b2 d1kw3b1 d4ghga1  
d1tfza1 d3isqa1 d3isqa2 d1sqia1 d1sqia2 d1lkda2 d1lkda1 d1mpya1  
d1cjxa2 d1cjxa1 d1sp9b2 d1t47a1 d1t47a2 d1f1ua2 d1sp8a1 d1sp8a2  
d1f1ua1 d1qsta\_ d2beia1 d4m3sa\_ d1u6ma1 d1ygha\_ d1yk3a1 d3dr6a\_  
d1xmta\_ d1z4ea1 d2ge3a1 d2fiaa1 d2jdca1 d1y9wa1 d3to7a\_ d1wwza1  
d2f14a1 d2ozua1 d2b5ga\_ d2cy2a1 d2p0wa\_ d1cm0a\_ d4pswa\_ d1yreal  
d1yr0a1 d1m4ia\_ d2gana1 d1yvka1 d1ghea\_ d2g3aa1 d1y7ra1 d2euia1  
d1q2ya\_ d2fsra1 d1xeba\_ d2ae6a1 d1cjwa\_ d1qsm\_ d2aj6a1 d1y9ka1  
d1i12a\_ d1vkca\_ d2atra1 d1n71a\_ d2d4pa1 d2fiwa1 d2fe7a1 d1tiqa1  
d2ou2a\_ d1yx0a1 d2fcka1 d1p0ha\_ d2j8ma\_ d2pq8a\_ d1z4ra1 d1s3za1  
d1ufha\_ d2hqya1 d2hqya2 d1lrza2 d1ne9a1 d1ne9a2 d1xvqa1 d1pn0a2  
d3hy2a\_ d2cvba1 d1o8xa\_ d1lu4a\_ d1we0a1 d2bmx1 d2a4va1 d1psqa\_  
d1xiya1 d1q98a\_ d1n8ja\_ d1zofa1 d2ggta\_ d3tjja\_ d4je1a1 d1o73a\_  
d3s9fa\_ d2zcta\_ d1qmva\_ d1jfua\_ d2b1ka\_ d5dvba1 d2b5xa1 d2v2ga\_  
d1st9a\_ d3tb2a\_ d411ra\_ d4fh8a1 d1e2ya\_ d2h30a\_ d1i5ga\_ d2z9sa\_  
d2f8aa1 d1tp9a1 d2b7ka\_ d1nm3a2 d3hvva\_ d2wfca1 d4kcea\_ d1xvwa1  
d4gqca1 d3qpma\_ d4k1fa\_ d1zzoa1 d1gp1a\_ d1prxa\_ d4od7a1 d1z6ma1  
d4mcua1 d4dvca1 d1r4wa\_ d3l9sa\_ d1un2a\_ d3rppa\_ d1e88a1 d1l6ja5  
d1l6ja4 d1eaka4 d1eaka3 d1l6ja3 d1h8pa1 d1jgta2 d1lea0a3 d1lecfa2  
d1q15a2 d1ct9a2 d1ao0a2 d1te5a\_ d1ys1x\_ d4hs9a\_ d1ex9a\_ d1ku0a\_  
d3qmma\_ d1lgya\_ d4l3wa\_ d1llfa\_ d1gz7a\_ d1lukca\_ d1j1ia\_ d2rhwa\_  
d3ia2a\_ d4dgqa1 d1hkha\_ d1zoia\_ d3zxha\_ d1cgl1 d1rm8a\_ d1eaka2  
d2jsda\_ d1cxva\_ d1hv5a\_ d1i76a\_ d1g12a\_ d3p0ya1 d1lgra1 d1lgra2  
d1n8yc2 d1n8yc1 d1m6ba2 d1m6ba1 d1m41a\_ d2bk7a\_ d3fjua\_ d1z5ra1  
d1kwma1 d1uwya2 d2c1ca1 d1dtda\_ d1h81a2 d1ohfc\_ d2tbvc\_ d1c8nc\_  
d1x36a\_ d1smvc\_ d1ng0c\_ d4sbvc\_ d1lopa\_ d1f2nc\_ d1js9c\_ d1f15b\_  
d1za7a\_ d1laja\_ d4l1u0a\_ d3unda1 d3e9aa1 d1vr6a2 d1n8fa\_ d2qkfa\_  
d1d9ea\_ d1o60a\_ d1ny721 d1ny722 d1a6ca3 d1a6ca2 d1a6ca1 d1pgl22  
d1pgl21 d1pgl11 d1ny711 d1mqta\_ d1d4m3\_ d1fmd3\_ d2mev1\_ glaym.1  
d1ev13\_ d4q4w1\_ d1r1a3\_ d2x5ia\_ d1rhi1\_ g1r1a.1 g1d4m.1 g1rhi.1  
d1b35b\_ d1loopa\_ d1tme1\_ d4iv1a\_ g1pvc.1 g1fpn.1 d1fpn1\_ d4gb31\_  
d1d4m1\_ d1fmd1\_ d1ev11\_ d2wzr3\_ g1cov.1 d1qqp3\_ g1fmd.1 d2x5ic\_  
d1rhi3\_ g1oop.1 d1hxs1\_ d1fpn3\_ d1bev1\_ g2mev.1 d1eah3\_ d1aym1\_  
d1pvc3\_ d1qqp1\_ d1zba3\_ d1h8ta\_ d3vbhc\_ g1b35.1 g1bev.1 d1hxs3\_

glev1.1 d1bev3\_ g1tmf.1 d1tmf1\_ d1b35a\_ d2mev3\_ gleah.1 g1h8t.1  
d1eah1\_ d4q4w3\_ d1r1a1\_ d1aym3\_ d1pvc1\_ d1zba1\_ d1h8tc\_ d1loopc\_  
d1tme3\_ g1qqp.1 d4iv1c\_ g1tme.1 d1y14b1 d2nn6i1 d1i941\_ d2zjra2  
d1smxa\_ d2qamc2 d1hh2p1 d2r7da1 d1r12a2 d1wfga1 d3bzka4 d1x6oa2  
d3a0ja\_ d2j01d2 d2ja9a1 d4q15a\_ d1hr0w\_ d1luza\_ d2n3sa\_ d2vnud1  
d1h95a\_ d1go3e1 d2nn6h1 d1ne3a\_ d2mo1a\_ d1iz6a2 d1jjga\_ d1e3pa2  
d2ix0a3 d2ix0a2 d21xja\_ d1ueba3 d1ueba2 d2z0sa1 d1u01a1 d2ix0a1  
d2eifa2 d2je6i1 d3i2za1 d2c35b1 d2ahob2 d1t9ha1 d3i4oa\_ d2qall1  
d1jt8a\_ d2nn6g1 d1g6pa\_ d3cama\_ d1i94q\_ d1c9oa\_ d1d7qa\_ d2ba0a1  
d2vnud2 d2vnud3 d1khia2 d2qalq1 d1wi5a1 d1xta2 d1ny4a\_ d2flia1  
d1h1ya\_ d1tqja\_ d1tqxa\_ d1prtb2 d2r80b\_ d1cqxa1 d1cg5a\_ d1gcvb\_  
d3boma\_ d2h8fb\_ d2raoa\_ d3bj1a\_ d4hrrb\_ d2r50a\_ d3d1kb\_ d2aalb1  
d3zhwa\_ d3hf4b\_ d3gdja\_ d1jebb\_ d3bj1b\_ d1x9fb\_ d1wmub\_ d1gcva\_  
d3bcqb\_ d3d4xb\_ d2dc3a\_ d3hf4a\_ d4yu3a\_ d3k8ba\_ d1qpwb\_ d2r80a\_  
d3bcqa\_ d1v4wa\_ d3wtgb\_ d1j17a\_ d4esaa\_ d1a9we\_ d3d1ab\_ d1fsla\_  
d4h21a\_ d1v4wb\_ d1mwca\_ d1vhba\_ d1jeba\_ d1spgb\_ d1h97a\_ d1q1fa\_  
d1tu9a1 d3d1aa\_ d1hdsb\_ d3hyub\_ d2zfb\_ d3fs4a\_ d1oj6a\_ d1shrb\_  
d4h21b\_ d4yu3b\_ d1spga\_ d3hrwa\_ d3qqra\_ d3at5a\_ d4wchd\_ d3hyua\_  
d1cg5b\_ d1uc3a\_ d1hbra\_ d2raob\_ d1outb\_ d4esab\_ d3gdjb\_ d3qqqa\_  
d1x9fc\_ d3vrfa\_ d1litha\_ d3mkba\_ d3d4xa\_ d3mjpa\_ d1j16a\_ d3fh9a\_  
d1outa\_ d2dc3b\_ d1lit2a\_ d3eoka\_ d3g46a\_ d1qpwa\_ d3vrfb\_ d1ch4a\_  
d1x9fd\_ d1hdsa\_ d2zfb\_ d3mkbb\_ d1or4a\_ d3wtga\_ d1a4fa\_ d3fh9b\_  
d3bomb\_ d3cy5a\_ d3at5b\_ d1x9fa\_ d2oifa\_ d4lmb\_ d1cpcb\_ d3v57a\_  
d1kn1a\_ d1cpca\_ d4f0ta\_ d2vjha\_ d4po5b\_ d1eyxa\_ d1alla\_ d4f0tb\_  
d1b33b\_ d1b8db\_ d4h0mb\_ d1b33a\_ d2vjhb\_ d4lm6b\_ d2vmlb\_ d1allb\_  
d2vjta\_ d3dbja\_ d2vmla\_ d2vjtb\_ d4f0ub\_ d1f99b\_ d4rmpa1 d1liaa\_  
d1eyxb\_ d2uulb\_ d4lmsb\_ d4f0ua\_ d2bv8a\_ d1f99a\_ d2bv8b\_ d2c71b\_  
d3dbjb\_ d4rmpb1 d1b8da\_ d4h0ma\_ d3v57b\_ d1kn1b\_ d1liab\_ d2uula\_  
d2j96a\_ d1kyqa1 d1cwva5 g1gxs.1 g1wht.1 d3nqyb\_ d4gera\_ d1bqba\_  
d1mtza\_ d2xqfa\_ d1ea5a\_ d1f6wa\_ d1qe3a\_ d1k4ya\_ d4qwwa\_ d2ha2a\_  
d3c8da2 d2pbla1 d1jjia\_ d1lzl\_ d1jjfa\_ d2qvba\_ d2v9za\_ d4kafa1  
d4iuaa3 d4bvva\_ d5hpga\_ d3k65a\_ d1ki0a3 d1ki0a2 d1ki0a1 d1a0ha1  
d1pmla\_ d3sp8a3 d2feba1 d1dosa\_ d1gvfa\_ d3qm3a1 d2fjka\_ d1f74a\_  
d3l21a\_ d2e1da\_ d1to3a1 d1w3ia\_ d1sfla\_ d1n7ka\_ d1vcva1 d4imea\_  
d1wa3a\_ d2ocza1 d1f2ja\_ d3m16a\_ d2yxga\_ d1ub3a\_ d3a5fa\_ d1fbaa\_  
d1l6wa\_ d1xfba1 d1wx0a1 d1vpxa1 d1ojxa\_ d1mxsa\_ d2a4aa1 d1xkya1  
d3cq0a1 d3s1xa\_ d1f05a\_ d1fdja\_ d3cpra1 d4d2ja\_ d1yloa2 d1y7ea2  
d1y0ya3 d1lfwa1 d1vixa1 d1fnoa4 d1vhoa2 d1ysja1 d1vhea2 d1z21a1  
d2fvga2 d1vgya1 d1r3na1 d2grea2 d1xmba1 g1q71.1 d1rtqa\_ d3rp2a\_  
g1lucy.1 d1fuja\_ d2zchp\_ d3w94a\_ d1si5h\_ d1lo6a\_ g2pka.1 d1cgha\_  
d1kigh\_ d1a5ia\_ d3s9ba\_ d1hj8a\_ d1ao5a\_ d2anya\_ d1q3xa1 d1gvza\_  
d1azza\_ d4gsoa\_ d2f91a1 d1liaua\_ d1gdna\_ d1eufa\_ g1fiw.1 d1eq9a\_  
d4nfea\_ d2rdla\_ d1spja\_ d1elva1 d1a7sa\_ d1ekbb\_ d1pfxc\_ d1yc0a\_  
d2aiqa\_ g1fiz.1 d1fi8a\_ d4k60a\_ d4dgja\_ d1mzaa\_ d1lop0a\_ d3tjva\_



d1pytd\_ d1sgfg\_ glgg6.1 d2eeka\_ glrtf.1 d3g01a\_ d1pytc\_ d4e7na\_  
d1ddja\_ d1z8ga1 d2hlca\_ d1npma\_ d1brup\_ gljou.1 d1sgfa\_ d1autc\_  
g2hnt.1 g1kdq.1 d1orfa\_ d3s69a\_ d4crga\_ d1fxya\_ d1bqya\_ d2ftba\_  
d1pmpa\_ d2rcqa1 d1fdqa\_ d4lkpa\_ d1sa8a\_ d1vyfa\_ d1lpja\_ d3vg7a1  
d4azqa1 d1o8va\_ d5bvqa\_ d1p6pa\_ d2qo4a\_ d1opba\_ d1yiva1 d1o1va\_  
d4bvma1 d4tkba\_ d4i3ba\_ d1bwya\_ d1ftpa\_ d1ggla\_ d4gkca\_ d1cbia\_  
d3p6da1 d1kqwa\_ d2a0aa1 d1dzka\_ d4tlja\_ d2a2ua\_ d4wfv\_a\_ d3tlda\_  
d4iaxa\_ d3zq3a\_ d2nnda\_ d1i4ua\_ d1kxoa\_ d1bbpa\_ d1kt7a\_ d1exsa\_  
d3s26a1 d1lf7a\_ d1qfta\_ d4gh7a\_ d1z24a1 d1qabe\_ d1xkia\_ d3bx7a\_  
d4iawa1 d1n0sa\_ d1gkab\_ d3kzaa\_ d2k23a\_ d2l9ca1 d2joza1 d1gm6a\_  
d3kffa\_ d3saoa1 d1e5pa\_ d1yupa1 d1liua\_ d3lgia\_ d3i77a\_ d2z9ia2  
d4nsva\_ d1lcya2 d4jcna\_ d1agja\_ d1os8a\_ d1hpga\_ d1p3ca\_ d1l1ja\_  
d1qtfa\_ d1e69a\_ d1mv5a\_ d3g60a4 gl1i8.1 d1ewqa2 d1ji0a\_ d1qhla\_  
d1v43a3 d2wmfa1 d1vpla\_ d1g2912 d4a82a2 glf2t.1 d2d62a1 d3tuic1  
d2bbsa1 d3g60a3 d2ixea\_ d1g6ha\_ d1sgwa1 d2qi9c\_ d3rlfa1 d3b60a1  
d3d31a2 d2pzea1 glxew.1 d1jj7a\_ d1oxxk2 d2onka1 d1wlwa\_ d1iwea\_  
d1qf5a\_ d1vmaa2 d1nija1 d2p67a1 d3ihla\_ d1okkd2 d1lsl\_a2 d1slma2  
d1liona\_ d2v40a\_ d1dj3a\_ d3hida\_ d2v01a1 d2g0ta1 d1vcoa2 d1j8mf2  
d1g3qa\_ d1xjca\_ d1p9ba\_ d1qzxa3 d1ihua2 d1ihua1 d2qm8a\_ d1dj2a\_  
d4ioja\_ d1cp2a\_ d1yrba2 d1hyqa\_ d3gqba2 d1xp8a1 d1tf7a2 d1tf7a1  
d1ye8a1 d1skyb3 d2qe7d2 d4blta\_ d4huta\_ d3ldaa2 d4hyya\_ d2i3ba1  
d1cr1a\_ d3j9tb2 d3ntua2 d1vdza1 d2z43a\_ d1e9ra\_ d1nlfa\_ d3ziaa2  
d1n0wa\_ d1g6oa\_ d3ziad2 d3j9ta2 d1pzna2 d3gqbb2 d2i49a\_ d1nnfa\_  
d1xvxa\_ d1ursa\_ d1h3da1 d1iuda\_ d4mlva1 d1twya\_ d3e13x\_ d2nxoa1  
d4pfua\_ d3ttma\_ d1elja\_ d2qmwa1 d1us5a\_ d1y3na1 d1jeta\_ d1uqwa\_  
d4f19a1 d2esna2 d3thia\_ d3fasa1 d2uyeb\_ d2xwva1 d1r9la\_ d2fyia1  
d1pb7a\_ d2ozza1 d1sw5a\_ d1nh8a1 d1vr5a1 d2g29a\_ d1xs5a\_ d3lswa\_  
d2z23a\_ d3w9va\_ d3tcha\_ d1q35a\_ d1z7me1 d3q27a\_ d1p99a\_ d1ve4a1  
d2i6ea1 d4mcoa1 d4n8ya\_ d1eu8a\_ d1zbma1 d1hsla\_ d1ixca2 d1j1na\_  
d1xvya\_ d1y9ua\_ d2z22a1 d1xoca1 d4oera\_ d1wdna\_ d5f1qa1 d1xt8a1  
d4gwoa\_ d4igta1 d1pc3a\_ d4mmpa1 d1o63a\_ d2czla1 d2onsa2 d4mija1  
d4ok5a1 d2bmfa1 d2bmfa2 d1yksa1 d1yksa2 d1jr6a\_ d2qeqa1 d2j1qa1  
d1a1va2 d1eh3a\_ d3skpa\_ d1dtza1 d1dtza2 d1ieja\_ d1jnfa2 d1ce2a1  
d1jnfa1 d1b1xa2 d1b1xa1 d1jw1a1 d1jw1a2 d1ryoa\_ d1h76a1 d1h76a2  
d1c4oa1 d2p6ra3 d2p6ra4 d1oywa2 d1oywa3 d1wrba1 d1w36b2 d1w36b1  
d1c4oa2 d3bora\_ d1t6na\_ d2eyqa5 d2eyqa3 d2eyqa2 d2zu6a2 d1veca\_  
d1uaaa1 d1w36d1 d2g9na1 d1z3ix2 d2rb4a\_ d1hv8a1 d1hv8a2 d1t5ia\_  
d1w36c2 d2j0sa2 d2j0sa1 d1fuka\_ d3hjha1 d1z5za1 d1qdea\_ d1z63a1  
d1s2ma2 d1s2ma1 d1wp9a1 d1wp9a2 d1gm5a3 d1gm5a4 d3dina4 d3dina3  
d1q0ua\_ d1w36c1 d1z3ix1 d1nkta3 d1nkta4 d1uaaa2 d1w36d2 glqhh.1  
d2fwra2 d2fwra1 d2v8ta\_ d3q3ma\_ d1za0a1 d2inca\_ d1jk0a\_ d2incb\_  
d1mhyb\_ d3hf1b\_ d1mtyb\_ d1r2fa\_ d2uw1a\_ d1mhyd\_ d3n37a\_ d1afra\_  
d1oquc\_ d1syya\_ d1mtyd\_ d2o1za\_ d1uzra\_ d1smsa\_ d2fkza\_ d1zuja1  
d1s3qa1 d2fjca1 d1z6om1 d1veia\_ d4dyya\_ d1jiga\_ d3gvya\_ d2pyba\_

d4cy9a1 d3bvfa1 d1r03a\_ d2cf7a\_ d1nf4a\_ d1zs3a1 d4iwka\_ d3ka8a\_  
d3np0x\_ d1n1qa\_ d11b3a\_ d4e6ka\_ d1z6oa1 d2fzfa1 d4dyua\_ d3ge4a\_  
d1jgca\_ d4am4a\_ d2z6ma\_ d1ji5a\_ d1vlga\_ d11koa1 d1krqa\_ d3qz3a\_  
d1o9ra\_ d2fffxj\_ d1euma\_ d1yv1a1 d2v2pa\_ d4di0a\_ d1dpasa\_ d2cbia2  
d1gqia1 d2choa2 d1oewa\_ d2qzxa\_ d2asia\_ d1psoe\_ d1miqa\_ d1smra\_  
d2h6ta\_ d1pfza\_ d1lizda\_ d3hd8a\_ d1dpja\_ d4aa9a\_ d1t6ex\_ glb5f.1  
g1lya.1 g1htr.1 d1qdma2 d1bxoa\_ d1wkra\_ d1tzsa\_ d1libqa\_ d2qzwa\_  
d1bdqa\_ d3ggta\_ d3ixoa\_ d1mrxa\_ d2haha\_ d1tw7a\_ d4njsa\_ d1sgua\_  
d2p3da\_ d1nsoa\_ d3d3ta\_ d2rkfa\_ d2rspa\_ d3ogpa\_ d3ekwa\_ d2o4na\_  
d2j9ja\_ d1baia\_ d3ggua\_ d3lzua\_ d4npua\_ d4j55a\_ d2r8na\_ d2fxda\_  
d2p3ca\_ d4dgea\_ d3ttpa\_ d3t3ca\_ d2p3aa\_ d2hc0a\_ d2fdda\_ d3mwsa\_  
d1k8rb\_ d1wgra1 d1ef5a\_ d1wfy1 d1e8ya3 d1wgya1 d11fda\_ d2cs4a1  
d1wxma1 d2byea1 d3kh0a1 d2byfa1 d1wxaa1 d1e7ua3 d1h4ra3 d4yl8a1  
d2a16a3 d1zbf1a1 d2z1ha\_ d2etja1 d3qioa1 d1j11a\_ d2e41a\_ d1j12a\_  
d21sna1 d1io2a\_ d1uaxa\_ d2yv0x\_ d1mu2a1 d1ekea\_ d1i39a\_ d1wgda1  
d1wgg1a1 d4q5eb\_ d1wjna1 d1se9a\_ d3n3kb\_ d1wz0a1 d1we6a1 d2m0xa\_  
d2gbka\_ d3rt3b1 d1wh3a1 d1sifa\_ d2ekek2 d4ii2b1 d4hk2a1 d1c3ta\_  
d1m94a\_ d1wgha1 d1ttna1 d1wx8a1 d3v6cb1 d2ma9b\_ d4i61b1 d1bt0a\_  
d2jvca1 d1iyfa\_ d2k1fa\_ d1wxva1 d1wf9a1 d1t0ya\_ d2io0b2 d1x1ma1  
d2gbma\_ d1zw7a1 d2m17a\_ d1ud7a\_ d1we7a1 d21wpa\_ d2gbja\_ d1wjua1  
d1v6ea1 d1v86a1 d4eewa\_ d1wiaa1 d4icva\_ d4gu2a\_ d1wx7a1 d1wy8a1  
d4hjk1a1 d2faza1 d1v5oa1 d3ruib\_ d3waob\_ d2r2qa1 d3m95a\_ d3wana\_  
d1qoza\_ d5ajha1 d2h0ba\_ d2erfa\_ d1h30a2 d1h30a1 d3mw4a1 d1pz7a\_  
d2r1ba\_ d3v64a1 d1d2sa\_ d3bopa1 d3mw3a1 d1okqa1 d1okqa2 d1wioa4  
d1ccza2 d1vcaa1 d1dr9a2 d1ic1a1 d2d9qb1 d2nxyb2 d1um8a\_ d1ixza\_  
d1qvra2 d1qvra3 d1qzma\_ d1sxjc2 d1jr3d2 d2p65a\_ d118qa2 d1g8pa\_  
d3hu3a3 d1sxjd2 d1njfa\_ d1in4a2 d1sxja2 d1tuea1 d2ce7a2 d1w5sa2  
d1sxjb2 d1d2na\_ d1ny5a2 d1ofha\_ d2gnoa2 d2a5yb3 d1fnna2 d1u0ja1  
d11v7a\_ d1iqpa2 d2fnaa2 d1ixsb2 d4gita\_ d1sxje2 d1g41a\_ d1svpa\_  
d1mbma\_ d3su6a1 d1cu1a1 d4agka\_ d1vcpa\_ d1q31a\_ g1n11.1 d3e90b\_  
d1ep5a\_ d3u1jb\_ d21j7a\_ d1n4na\_ d2m8bb1 d2kyqa\_ d3psma\_ d1jkza\_  
d1jxca\_ d2g11a\_ d1ugla\_ d4uj0a\_ d2k4ua\_ d1hp2a\_ d2lu9a\_ d1baha\_  
d2meoa1 d1wm7a\_ d1hlya\_ d1n8ma\_ d1jlza\_ d1wpda\_ d1c55a\_ d1pvza\_  
d1wt7a\_ d1rjia\_ d1wz5a\_ d1m2sa\_ d1pjva\_ d1c49a\_ d1qkya\_ d2ktca1  
d1wmta\_ d1du9a\_ d1j5ja\_ d1r1ga\_ d1t0za\_ d2i61a\_ d1t1ta\_ d1sn4a\_  
d1kv0a\_ d21kba\_ d1npia\_ d1wwna\_ d1pe4a\_ d2kbka\_ d21i7a\_ d1djta\_  
d2kbha\_ d1dq7a\_ d1sega\_ d1omya\_ d1zywa1 d1jzaa\_ d1bnla\_ d1lixra2  
d1iyjb4 d1iyjb5 d1iyjb3 d1o7ia\_ d4ipca1 d1x3ea\_ d4apva\_ d1jb7a1  
d1jb7a2 d1jb7a3 d3kdfa\_ d1ue1b\_ d1wjja1 d3eiva\_ d1xjva2 d1xjva1  
d2ccza2 d1se8a\_ d111oc\_ d1jb7b\_ d1qvca\_ d3ulla\_ d1qzga\_ d1miau4  
d1miau5 d3g48a1 d1gd7a\_ d1mkha\_ d1jjcb3 d1pyba\_ d3ubub\_ d1legia\_  
d1qo3c\_ d1v7pa\_ d1tdqb\_ d3ubua\_ d1c3ab\_ d1h8ua\_ d3bx4b\_ d1t8ca1  
d1sb2a1 d1qdda\_ d2ziba1 d3cada\_ d1j34b\_ d1jwia\_ d1jzna\_ d1c3aa\_  
d1oz7b\_ d1wmza\_ d3bdwb\_ d1hq8a\_ d1fifa1 d1dv8a\_ d3hupa\_ d1wk1a1

d1umra\_ d2afpa\_ d3bx4a\_ d1gz2a\_ d1sl6a\_ d1v7pb\_ d3g8ka\_ dlixxa\_  
d1j34a\_ d1jwib\_ d1g1sa1 d1y17a1 d1ja3a\_ d1fvub\_ d3bdwa\_ d1sb2b1  
d1fvua\_ d1umrc\_ d1oz7a\_ d4m17a\_ d3cfwa1 d1ypqa1 d1g1ta1 d3fd4a\_  
d3l9jc\_ d4dn8a1 d1v4lb\_ d1rd1l\_ d2msba\_ d1dgsa2 d1fvia1 d1ckma1  
d1x9na2 d1pfsa\_ d2a1ka\_ d1je5a\_ d1rpma\_ d2shpa1 d1yfoa\_ d1l8ka\_  
d2ooqa1 d1g4us2 d1p15a\_ d1lara2 d1lara1 d1wcha\_ d2fh7a2 d2fh7a1  
d3azya\_ d3wvja\_ d1upsa1 d1ajoa\_ d2hyka\_ d1ajka\_ d2vy0a\_ d1o4ya\_  
d3o5sa\_ d3d6ea\_ d3atga\_ d1dypa\_ d1lumza\_ d3i4ia\_ d1c1la\_ d4lbqa\_  
d1a78a\_ d1slta\_ d4no4a\_ d3zsja\_ d3duia\_ d1is3a\_ d1qmja\_ d1hlca\_  
d1tdha3 d1q3ba3 d1k82a3 g1qmo.1 g1len.1 d3zyra\_ d1fnya\_ g2ltn.1  
d1avba\_ d3usua\_ d1dhkb\_ d1f9ka\_ d1lukga\_ d1g8wa\_ d1g9fa\_ d1wbfa\_  
d3wcsa\_ d1g7ya\_ g1loe.1 d1mvqa\_ d1hq1a\_ d1v6ia\_ d1dbna\_ d1qnwa\_  
d1fx5a\_ d4l8qa\_ d1ioaa\_ d3n35a\_ d3ubra\_ d1qo8a1 d1d4ca1 d2k3va\_  
d1ft5a\_ d1m1qa\_ d2j7aa\_ d1h21a\_ d1ogyb\_ d4fasa\_ d1jnia\_ d1oaha\_  
d1sp3a\_ d3h33a\_ d1rwja\_ d19hca\_ d1os6a\_ d3bxua\_ d3h4na\_ d3caoa\_  
d1j0pa\_ d2ctha\_ d1duwa\_ d1ofwa\_ d2e84a\_ d1hh5a\_ d1gyoa\_ d3h34a\_  
d1dszb\_ d1a6ya\_ d3cbba\_ d1ynwa1 d1r4ia\_ d1hcqa\_ d2hana\_ d2hanb\_  
d2enva1 d1kb4b\_ d2n1lb\_ d1lola\_ d1cita\_ d2dara2 d2dara1 d1wyha2  
d2dloa2 d1rutx4 d1rutx3 d2cuqa2 d1x4la2 d1x4la1 d1x3ha2 d1x3ha1  
d2d8za1 d1x61a2 d1x6aa1 d1x6aa2 d2cora2 d2cora1 d1v6ga1 d1v6ga2  
d2d8za2 d1x64a1 d1x64a2 d1b8ta1 d2co8a1 d1x63a2 d2dj7a2 d2dj7a1  
d2cu8a2 d2cu8a1 d1g47a2 d1g47a1 d1j2oa1 d1wyha1 d2dloa1 d1wiga1  
d1wiga2 d2cupa2 d2cupa3 d1x68a1 d2d8ya2 d2d8ya1 d1m3va2 d1x62a1  
d1x68a2 d1x61a1 d1b8ta3 d1b8ta2 d2d8xa2 d2d8xa1 d1x4ka1 d1x4ka2  
d2cuqa1 d1m3va1 d2co8a2 d1j2oa2 d1x63a1 d2cura1 d2cura2 d1x62a2  
d1op9a\_ d1y0la1 d1letzb1 d1legj11 d2gsib1 d1nj9a1 d4jfh1 d1aqk11  
d1t2ja\_ d1llo4h1 d1zvya1 d3v4v11 d4enec1 d1kxtb\_ d5e8ea1 d2pxya\_  
d4weud\_ d1xiwc\_ d2esvd1 d1qznh\_ d1logae1 d1f4xh1 d4n1hb\_ d3ezjb1  
d3mlw11 d1kfah1 d1letza1 d1b4jh1 d3cfic\_ d4w68a\_ d2arja1 d1ek3a\_  
d2ok011 d1vera\_ d1uwgh1 d1blnb1 d1fpth1 d1rzga1 d2giya1 d4m3kb1  
d1nc2a1 d2nyyd1 d1ncna\_ d1fbih1 d5dxwa\_ d4fqqa1 d1dqdh1 d1jfq11  
d1kelh1 d1faih1 d1frg11 d1fig11 d4m6n11 d1fo0a\_ d4hxb11 d3b5ga\_  
d3quyd1 d2h9gb1 d1i8kb\_ d2dd8h1 d2ck0h1 d1eaja\_ d4w6wb1 d2a6ib3  
d1t66d1 d2e27h\_ d1ob1b1 d1f11b1 d2v7na1 d1ad0a1 d2xt1b1 d1pskh1  
d4i13b1 d2op4l1 d1a0ql1 d1uwel1 d1za3a1 d1ncb11 d4uu9a\_ d1bm3h1  
d1cloh1 d1nqba2 d1cf8h1 d4y5va\_ d1mhph1 d5anma1 d4cdgc1 d4ldeb\_  
d1y0lb1 d2pcpb1 d1z3g11 d1dfb11 d1fh5h1 d3g5xa1 d1tzib1 d4dn3l1  
d3zhka1 d2b1hh1 d2uyla1 d1f3dh1 d1nj9b1 d2agjh1 d2h1pl1 d1q72h1  
d8fabb1 d1ndmb1 d1rjca1 d4u6hb1 d3upca\_ d2fbj11 d1osph1 d1tvda\_  
d2cjev\_ d4fhbd1 d1bd2d1 d1rz7h1 d3nn8a\_ d1blna1 d1knoa1 d1nfd1  
d2bmkb1 d1dq11\_ d1igyb1 d1igf11 d12e8h1 d3utza1 d1nc2b1 d1rihh1  
d4mwfb1 d4jvpa1 d1mieh1 d1rhfa1 d1fgn11 d1sbsh1 d1lp9e1 d1dn0a1  
d4lqf11 d1iaih1 d1kgcd1 d1mh5b1 d1gpol1 d2g60h3 d1f8t11 d2jixd1  
d4grwh\_ d1fo0b\_ d1bfob1 d1axsa1 d1u9ka\_ d1nmbh\_ d1h8na1 d1h8na2

d1jguh1 d4eura1 d3sdy11 d35c8h1 d1w7211 d1mvub\_ d1i9rh1 d1ob1a1  
d4wenb\_ d1yeeh1 d3ietc1 d1f58h1 d1ad0b1 d1mqkl\_ d1nbvh1 d4b50a\_  
d3r8bb\_ d1baf11 d1mamh1 d4rgne1 d2gsgb\_ d35c811 d1bafh1 d1ai1h1  
d2pcpa1 d2fath1 d2x1pa\_ d1orsb1 d1libg11 d1shma\_ d1a2yb\_ d1u0qa\_  
d2coqa\_ d1hilb1 d1qfwi\_ d1jv5b\_ d1fn4b1 d5e0qa\_ d1nsh1 d1plgl1  
d4ocx11 d1kb5h1 d1rzhf1 d1pg7x1 d2fx7h1 d2oi9c\_ d1l7i11 d3eyva1  
d1d5i11 d4ffyl\_ d1tet11 d1a6wh\_ d1lac6a\_ d3dvfa\_ d1nfdel d1mimh1  
d1ri8a1 d1jhlh\_ d3dura\_ d1fskb1 d1f97a1 d3so3b1 d2ak4d1 d1lp9f1  
d4z7wf1 d1l7th1 d4y5ya\_ d4x7ec1 d1emth1 d1ikf11 d1nlbh1 d4uta11  
d1bjma1 d1eapb1 d1u6ah1 d2dtgd1 d1kj2b\_ d1xeda1 d1cleh1 d1fgvh\_  
d2bnub1 d2fb4h1 d2dtgb1 d1ktrh\_ d1jpth1 d1qkz11 d4hepg\_ d2atpb1  
d1flrh1 d2hrpl1 d1mvfa\_ d1iaim1 d3k80a1 d2jb5h1 d3zkxc\_ d4grwe\_  
d1it9h1 d1rhhb1 d3w9ec\_ d1e4wh1 d1sy6h1 d2j6eh1 d3qxta\_ d1jglh1  
d1p7ka1 d1tzhb1 d4n8pa1 d1gaf11 d2jelh1 d1wioa2 d4i0cc1 d1cicb1  
d1lmka2 d1lmka1 d1iqwh1 d1orqb1 d1ejoh1 d1jnlh1 d4zg1a\_ d43c9b\_  
d1ggb11 d1wejh1 d3q6fa1 d1f3dj1 d3c6la1 d1bqlh1 d3p9wb\_ d1a3r11  
d1h0db1 d2uzil\_ d1eo811 d1qfwl\_ d1n7ml1 d1igja1 d1c5ch1 d2a9mh\_  
d1rmfh1 d1fj1b1 d4heme\_ d1ccza1 d1a5fh1 d1ogad1 d1dlfh\_ d1qa9b\_  
d1vgel1 d3qskb\_ d1sjxa\_ d4ozfg1 d1sq2n\_ d1qd0a\_ d1kcvh1 d1c5db1  
d3qcull d8faba1 d3bn9d1 d1mjuh1 d4y8dc\_ d7fabh1 d3dvgb1 d1lo011  
d1a6tb1 d1gigh1 d1kcrh1 d2hwz11 d1yjd1 d3clfl1 d4krna\_ d1d171\_  
d1e6ol1 d1mexh1 d3r0ma\_ d4kkna\_ d1fns11 d1oaqh\_ d1rzia1 d1ucbh1  
d1ncw11 d4b41a\_ d1nfd1 d2mpah1 d2d7t11 d4grwf\_ d4b5ea\_ d1lk3h1  
d3u79a\_ d4u3xa\_ d1ghf11 d1bvkb\_ d1mcww1 d1b88a\_ d1jrhh1 d32c2b1  
d4wemb\_ d1dsfh\_ d1op3h1 d1ce111 d1iqda1 d1qoka1 d1qoka2 d1qfuh1  
d2crya1 d1ay1h1 d1oaql\_ d3ab0b\_ d1rur11 d1t4kb1 d1bz7b1 d1n0xh1  
d1for11 d1ucb11 d4w6yb\_ d43c9a\_ d2aab11 d1tzia1 d4n1ca\_ d1k6qh1  
d3g9ab\_ d4tvsa1 d1ligmh\_ d1pz5b1 d3dx9a1 d3wxwh\_ d1kcul1 d3eaka\_  
d4qlra1 d1cr911 d1d9ka\_ d1f4x11 d1deea1 d2i27n2 d1c12a1 d2orb11  
d1j8hd1 d1mcph1 d1c5da1 d1kenh1 d1bd2e1 d1h5ba\_ d4x7fc1 d3upaa\_  
d1t3fa1 d1indh1 d2dtgc1 d4hc111 d1zv5a1 d4wgvb\_ d1uwgl1 d4f37k1  
d1aqkh1 d1vesa\_ d3zkqd\_ d1fpt11 d1lo411 d1knob1 d3rrqa\_ d1ct8b1  
d4orz\_ d1mlbb1 d4hgkc1 d1dqdl1 d1bogb1 d4ozhe1 d1dr9a1 d1i7za1  
d1dn0b1 d1kell1 d1rzi1 d1ypzf1 d1wtla\_ d1hkfa\_ d1fail1 d1figh1  
d2vyre\_ d1sjva\_ d1ohqa\_ d1bfoa1 d1pkqb1 d1mjul1 d1b4j11 d1nsh11  
d2arjb1 d1p4bh\_ d4aj0a\_ d3nn8b\_ d2rcja1 d1f2xk\_ d4v1dd\_ d1adqh1  
d2eksa\_ d4k3ga\_ d1jfqh1 d1uweh1 d1frgh1 d4gftb\_ d1uz8b1 d4n1ea\_  
d1bm311 d1clo11 d3mcka1 d2vq1a1 d1ae6h1 d4aq1b1 d1uj3b1 d1nbqa1  
d1fh511 d2ck011 d2ywza\_ d1q7211 d4nxbx\_ d1hila1 d4hz1b1 d2j8811  
d1zmya1 d1cd0a\_ d1a4ka1 d1psk11 d1a0qh1 d4krmb\_ d1ncbh1 d2fbjh1  
d1j8he1 d1i3ua\_ d1cf811 d1fe8h1 d2p1ya1 d1eeqa\_ d2x89a\_ d1o10a\_  
d2r0lh1 d1ub5a1 d1dfbh1 d3eyvb1 d4jdvb1 d4p2cg\_ d2gsia1 d2agj11  
d1u3ha1 d2h1ph1 d1rih11 d1fskc1 d1boga1 d2a7711 d1ospl1 d1qfoa\_  
d3dwta\_ d2fx711 d1rz711 d3stba1 d1pkqa1 d1b6da1 d1dzba2 d1dzba1

d1kj2a\_ d4l1ha\_ d1rzgb1 d1dq1h\_ d12e811 d1mie11 d1jmaa\_ d1sbs11  
d1fgnh1 d1f5811 d1mqkh\_ d1ndgb1 d3qeg11 d1ia11 d2aw2a1 d1tqbc1  
d3fo2a1 d4dkaa\_ d1f8th1 d2g6011 d2ywy\_ d1uj3a1 d1yc7a\_ d3bd3a\_  
d4w6xb1 d1nmb1\_ d1i8ka\_ d1rj1b1 d1ypze1 d1p7kb1 d1kxqe\_ d1gpoh1  
d2z4qa1 d1w72h1 d1i9r11 d4qgya1 d4xt1c\_ d2qqnh1 d1cica1 d3c08h1  
d2cd0a\_ d2bdnh1 d1hnga1 d1mam11 d1nldh1 d1cr9h1 d4lcih1 d3bkyh1  
d3qg711 d1ai111 d1kxvc\_ d4iosd\_ d1l7ih1 d2x1qa\_ d1ub6b1 d3k74b\_  
d1ibgh1 d1teth1 d1igy1 d1hxma1 d2x6ma\_ d2e71a\_ d5e03a\_ d1qfwm\_  
d2r0kh1 d1igjb1 d1rurh1 d1plgh1 d1mj8h1 d1yuhb1 d3fmg11 d1rzfl1  
d1emt11 d1ad9b1 d1igtb1 d1n1b11 d1d5ih1 d3k7ua\_ d4ffyh\_ d1bwwa\_  
d3dvg1 d1a6ta1 d1fgv1\_ d4qxgl1 d1mim11 d1jh11\_ d2hffb1 d2hh011  
d1qkzh1 d1l7t11 d1afvh1 d1iaii1 d2cjuh\_ d1um5h1 d2ghwb2 d2ghwb1  
d1kgec1 d2fgwh1 d1ikfh1 d1dvfd\_ d2i24n1 d2xtjb\_ d1za3b1 d2yc1a\_  
d2hh0h1 d2x1oa\_ d1bvka\_ d1rj1a1 d5e7ba1 d1igta1 d1i11b1 d2fb411  
d1mvua\_ d1jpt11 d32c2a1 d1fvca\_ d1iqdb1 d2hrph1 d2p4ab\_ d4qo1a\_  
d1p2cb1 d1wt5c\_ d1t4ka1 d5c1mb\_ d1it911 d1bz7a1 d1b2wh1 d1e4w11  
d1jnl11 d1yedb1 d1za6b1 d3u7aa\_ d1igfh1 d3gnm11 d1orsa1 d1wejl1  
d1a2ya\_ d1hxmb1 d1gafh1 d2j4wh1 d1pz5a1 d1j05a\_ d1a3rh1 d4fq111  
d1qfwh\_ d1eo8h1 d1n7mh1 d4s11a\_ d1kegh1 d5da4a\_ d1iqw11 d3whxb1  
d1vgeh1 d1deeb1 d1c12b1 d1t2q11 d1ad9a1 d3gsnb1 d3b2uc1 d1ggbh1  
d1t3fb1 d1nak11 d4ocmc\_ d1lila1 d2v7hb3 d2esve1 d1mcoh1 d2qr0b1  
d2q3aa\_ d1ct8a1 d1kcr11 d2pxyb\_ d2uzih\_ d5c3ld\_ d3durb\_ d1c5c11  
d2ak4e1 d1d17h\_ d1xiwd\_ d1mlba1 d1rmf11 d1i7zb1 d1dlf1\_ d2xa3a\_  
d5bq7b1 d1dqqb1 d3h4211 d1egjh1 d1kcv11 d1fe811 d2j6e11 d1f3rb2  
d11k311 d1sm3h1 d1q0xh1 d1ghfh1 d7fab11 d1igch1 d1l00h1 d4idla\_  
d5c2b1\_ d1jrh11 d1i11a1 d3zhda1 d4kfzc\_ d1b0wa\_ d1e6oh1 d1mex11  
d4krpb\_ d1fnsh1 d1ncwh1 d4hgma\_ d4eigb1 d4rzca\_ d2mpa11 d4y5xa\_  
d5en2b1 d3lrga1 d4ej1c1 d1rhha1 d1j05b\_ d1forh1 d1q9wb1 d2wzpd\_  
d2aq2a1 d1h0da1 d3revb1 d2ij0c1 d1tzh1 d4m7j11 d1k6q11 d3b9kc1  
d1igm1\_ d3qeua1 d1dsf1\_ d1celh1 d1kcuh1 d1zvha1 d1zvva1 d1tqbb1  
d1ay111 d2qscl1 d2cgrh1 d1n10h1 d1ken11 d3eo0a1 d4n9ob1 d1n0x11  
d3k1kc\_ d2cqva1 d1fhga\_ d2k1ma\_ d2d12a1 d1biha3 d1biha1 d1biha4  
d3qp3a1 d1g1ca\_ d1gxea\_ d1cvsc2 d1cvsc1 d1xmwa2 d1m4ka2 d2otpa2  
d1biha2 d1rhfa2 d2fcba2 d2fcba1 d1wwbx\_ d1gsma2 d1lepfa1 d1lepfa2  
d2dava1 d1waaa\_ d1f97a2 d1x44a1 d1vcaa2 d1fnla2 d1fnla1 d3b5ha2  
d3h8na2 d3h8na1 d1jbja1 d1jbja2 d1pd6a\_ d1f2qa2 d1f2qa1 d3cx2a\_  
d1nbqa2 d3b5ha1 d1n26a1 d1xiwb\_ d1xaua\_ d1fltx\_ d2ifga1 d1olla1  
d1olla2 d1cs6a4 d1cs6a3 d1cs6a2 d1cs6a1 d2gw5a2 d1sy6a1 d1xiwa\_  
d1ucta2 d1ucta1 d1ry7b2 d1gl4b\_ d1qz1a3 d1olza1 d2c9aa1 d1wwca\_  
d2aq2b1 d1ck1a1 d1enfa1 d1i4pa1 d1v1oa1 d1esfa1 d2g9hd1 d4ohja1  
d1klud1 d1bxta1 d1eu3a1 d1ty0a1 d1fnua1 d1c4qa\_ d1prtc1 d2wv6d\_  
d1prtf\_ d1ltrd\_ d4l63b1 d1r4pb\_ d1prtd\_ d1tl0f\_ d2bosa\_ d1prtb1  
d3chbd\_

**Family-97 (g.3.7.1)**

**Positive dataset contains 11 protein sequences.**

d1t0za\_ d2i61a\_ d1t1ta\_ d21kba\_ d1wwna\_ d1pe4a\_ d2kbka\_ d2li7a\_  
d2kbha\_ d1sega\_ d1zywa1

**Negative dataset contains 3988 protein sequences.**

d1m32a\_ d1libja\_ d1c7na\_ d1iuga\_ d4q75a\_ d2bkwa1 d1t3ia\_ d1n8pa\_  
d1qz9a\_ d1jff9a\_ d1p3wa\_ d3kgwa\_ d1c11a\_ d2ctza1 d1vjoa\_ d2rfva\_  
d1gc0a\_ d1cs1a\_ d1d2fa\_ d2ch1a1 d1qgna\_ d1pffa\_ d1elua\_ d1xfda2  
d1u08a\_ d1lc5a\_ d1b5pa\_ d2ay1a\_ d3pd6a\_ d7aata\_ d2csta\_ d1j32a\_  
d1fg7a\_ d4wlha\_ d1o4sa\_ d1v2da\_ d1gdea\_ d1m6sa\_ d1v72a1 d1svva\_  
d1ajsa\_ d1wsta1 d2f8ja2 d11k9a\_ d1vp4a1 d1xi9a1 d2gb3a1 d1yaaa\_  
d3i2ka1 d1mpxa2 d2cfba1 d1dfoa\_ d1o69a\_ d1bj4a\_ d3k28a\_ d2bwpa\_  
d3lg0a\_ d2fnua\_ d3ou5a\_ d1z7da1 d1b9ha\_ d1iaya\_ d4msoa\_ d1bs0a\_  
d1s0aa\_ d1sffa\_ d3tqxa\_ d1mdoa\_ d3qboa\_ d3pgya\_ d2dkja\_ d1ejia\_  
d1vefa1 d4wxga\_ d3bs8a\_ d3gbxa1 d1w23a\_ d4nmwa\_ d1cixa\_ d1y29a\_  
d1v7fa\_ d2jtba\_ d1d1ha\_ d1g9pa\_ d1lupa\_ d1qk7a\_ d1mb6a\_ d2a2va\_  
d1niya\_ d1i25a\_ d1hvw\_ d2mpqa\_ d1ie6a\_ d1la4a\_ d2mxoa1 d1dl0a\_  
d1koza\_ d1qk6a\_ d1emxa\_ d1lqra\_ d1c6wa\_ d1qnia1 d1fwxa1 d1f56a\_  
d1bypa\_ d1lazca\_ d1ws8a\_ d3u25a\_ d1cuoa\_ d1id2a\_ d1rkra\_ d2iaac\_  
d4dp1x\_ d1nwpa\_ d2gima\_ d2i7sa\_ d1qhqa\_ d1gyca3 d1hfua2 d1kbva1  
d1kbva2 d1sdda1 d1sdda2 d1gyca1 d1gyca2 d1mzya1 d2bw4a1 d1aoza1  
d1aoza3 d1aoza2 d1kyaa3 d1kyaa1 d1mzya2 d4e9sa1 d1sddb1 d1sddb2  
d1hfua1 d1hfua3 d1oel1a2 d1oel1a1 d1v10a2 d1v10a3 d1v10a1 d2dara2  
d2dara1 d1wyha2 d2dloa2 d1rutx4 d1rutx3 d2cuqa2 d1x41a2 d1x41a1  
d1x3ha2 d1x3ha1 d2d8za1 d1x61a2 d1x6aa1 d1x6aa2 d2cora2 d2cora1  
d1v6ga1 d1v6ga2 d2d8za2 d1x64a1 d1x64a2 d1b8ta1 d2co8a1 d1x63a2  
d2dj7a2 d2dj7a1 d2cu8a2 d2cu8a1 d1g47a2 d1g47a1 d1j2oa1 d1wyha1  
d2dloa1 d1wiga1 d1wiga2 d2cupa2 d2cupa3 d1x68a1 d2d8ya2 d2d8ya1  
d1m3va2 d1x62a1 d1x68a2 d1x61a1 d1b8ta3 d1b8ta2 d2d8xa2 d2d8xa1  
d1x4ka1 d1x4ka2 d2cuqa1 d1m3va1 d2co8a2 d1x63a1 d2cura1 d2cura2  
d1x62a2 d3sxwa1 d1j3qa\_ d4luka\_ d2bema\_ d1pama1 d1ea9c1 d1qhoa1  
d2fhfa2 d2fhfa1 d1k3ia1 d1j0ha1 d1csla1 d2bhua1 d1edqa1 d1f1sa2  
d1ut9a2 d1gvia1 d1txka1 d4alac\_ d1pjwa\_ d1rera1 d1s6na\_ d3uzqb\_  
d2phla2 d2phla1 d1fxza2 d1fxza1 d1lrha\_ d1uija1 g1dgw.1 d2v09a\_  
d1uika2 d1uika1 d1dgwa\_ d1fstb\_ d1ex0a1 d1g0da1 d2b5ea2 d2b5ea3  
d2b5ea1 d2b5ea4 d2kp1a1 d2kp2a1 d1hyua3 d1hyua4 d1j08a1 d1j08a2  
d1cg2a1 d1yloa2 d1y7ea2 d1y0ya3 d1lfwa1 d1vixa1 d1fnoa4 d1vhoa2  
d1ysja1 d1vhea2 d1z21a1 d2fvga2 d1r3na1 d2grea2 d1xmba1 g1q71.1  
d1rtqa\_ d1mqta\_ d1d4m3\_ d1fmd3\_ d2mev1\_ g1aym.1 d1ev13\_ d4q4w1\_  
d1r1a3\_ d2x5ia\_ d1rhi1\_ g1r1a.1 g1d4m.1 g1rhi.1 d1b35b\_ d1loopa\_  
d1tme1\_ d4iv1a\_ g1pvc.1 d1fnp1\_ d4gb31\_ d1d4m1\_ d1fmd1\_ d1ev11\_  
d2wzr3\_ g1cov.1 d1qqp3\_ g1fmd.1 d2x5ic\_ d1rhi3\_ g1loop.1 d1hxs1\_  
g1hxs.1 d1fnp3\_ d1bev1\_ g2mev.1 d1eah3\_ d1aym1\_ d1pvc3\_ d1qqp1\_  
d1zba3\_ d1h8ta\_ d3vbhc\_ g1b35.1 g1bev.1 d1hxs3\_ g1ev1.1 d1bev3\_  
g1tmf.1 d1tmf1\_ d1b35a\_ d2mev3\_ g1eah.1 g1h8t.1 d1eah1\_ d4q4w3\_

d1r1a1\_ d1aym3\_ d1pvc1\_ d1zba1\_ d1h8tc\_ d1loopc\_ d1tme3\_ g1qqp.1  
d4iv1c\_ g1tme.1 d1r0ka3 d1vkoa2 d1vm6a2 d3qvsa2 d1gr0a2 d1p1ja2  
d2ovga\_ d1sq8a\_ d1rzsa\_ d3kz3a\_ d3orca\_ d3gpdg2 d2q49a2 d1hdgo2  
d2g17a2 d2cvoa2 d2czca1 d3pwka2 d1lobfo2 d1i32a2 d1zyao2 d2pkqo2  
d1b7go2 d2hjsa2 d1cf2o2 d1vkna2 d1nvm2 d2msya\_ d2djoa1 d2r5za\_  
d1au7a1 d1f43a\_ d21mda1 d1akhb\_ d1s7ea1 d3nara\_ d1zq3p1 d2craa1  
d1mija\_ d4uuta\_ d3a01a\_ d1x58a1 d3rkqa1 d3cmya1 d2cqxa1 d2da6a1  
d1e3oc1 d1fjla\_ d1mh3a1 d1ig7a\_ d1x41a1 d1wh7a1 d1gt0c1 d2mw8a\_  
d1lfup\_ d1x2ma1 d1b72a\_ d1wi3a1 d1jgga\_ d1wjha1 d1x2na1 d1mnmc\_  
d2cuea1 d3k2aa\_ d2hosa\_ d2jwta2 d1pufa\_ d1oact1 d2hi3a\_ d1b8ia\_  
d4j19a\_ d3lnqa\_ d1wh5a1 d1b8ib\_ d1fexa\_ d2cqra1 d1guua\_ d1ug2a1  
d2cqqa1 d2ajea1 d4a69c\_ d1h8ac1 d2crga1 d2iw5b1 d1xc5a1 d1ofcx1  
d2cu7a1 d1wgxa1 d2cjja1 d2ckxa1 d1gvda\_ d6paxa1 d6paxa2 d1k78a1  
d1k78a2 d1xg1a1 d2iu5a1 d1zk8a1 d2g7sa1 d2fd5a1 d2np5a1 d1z0xa1  
d2id6a1 d2d6ya1 d2i10a1 d1vi0a1 d2oi8a1 d3c07a1 d2ns7a1 d2fq4a1  
d2yvea1 d1t33a1 d2o7ta1 d1rkta1 d2np3b1 d2g7ga1 d2gena1 d2fbqa1  
d2g7la1 d2gfna1 d2g3ba1 d2jj7a1 d2hyja1 d1sgma1 d1ui5a1 d2hkua1  
d2id3a1 d4jyka1 d1b10a1 d1d5ya1 d1d5ya2 d1gyta2 d3ubub\_ d1legia\_  
d1qo3c\_ d1v7pa\_ d1tdqb\_ d3ubua\_ d1c3ab\_ d1h8ua\_ d3bx4b\_ d1t8ca1  
d1sb2a1 d1qdda\_ d2ziba1 d3cada\_ d1byfa\_ d1j34b\_ d1jwia\_ d1jzna\_  
d1c3aa\_ d1oz7b\_ d1wmza\_ d3bdwb\_ d1hq8a\_ d1fifa1 d1dv8a\_ d3hupa\_  
d1wk1a1 d1umra\_ d2afpa\_ d3bx4a\_ d1gz2a\_ d1sl6a\_ d1v7pb\_ d3g8ka\_  
d1ixxa\_ d1j34a\_ d1jwib\_ d1g1sa1 d1y17a1 d1ja3a\_ d1fvub\_ d3bdwa\_  
d1sb2b1 d1fvua\_ d1umrc\_ d1oz7a\_ d4m17a\_ d3cfwa1 d1ypqa1 d3fd4a\_  
d3l9jc\_ d4dn8a1 d1v4lb\_ d1rd1l\_ d2msba\_ d3lv8a\_ d1s3ga1 d1zaka1  
d1s4qa\_ d3tvta2 d1uf9a\_ d1khta\_ d1ckea\_ d1osna\_ d1p5zb\_ d4tmka\_  
d3cm0a\_ d1tmka\_ d1jaga\_ d3h86a\_ d1t0hb\_ d1nn5a\_ d2h92a\_ d3kb2a1  
d2c95a1 d1yj5a2 d1kgda\_ d1ly1a\_ d2ak3a1 d1vyva2 d1deka\_ d2grja1  
d1p3ja1 d1y63a\_ d1e4ya1 d1s96a\_ d3iija1 d1lvga\_ d1nksa\_ d1vyua2  
d4e22a\_ d1qf9a\_ d1jjva\_ d1q3ta\_ d1ki9a\_ d1lw7a2 d1teva\_ d1kjwa2  
d1gsia\_ d1g3ma\_ d1j99a\_ d1t8ta1 d1nsta\_ d1fmja\_ d1zrha\_ d1ls6a\_  
d2a3ra\_ d2zptx\_ d3ckla\_ d1texa\_ d1q44a\_ d2gwha\_ d1odfa\_ d1uj2a\_  
d4gi7a\_ d2jeoa1 d1z0ja1 d3umra2 d3gj0a1 d2gaoa1 d1yzga1 d1x3sa1  
d1g7sa4 d1puja\_ d1udxa2 d1kk1a3 d2o52a\_ d1jwyb\_ d1zcaa2 d1zcba2  
d2fv8a1 d2cjwa\_ d3dz8a1 d1xzpa2 d1vg8a\_ d4qxaa\_ d2ew1a1 d1x1ra1  
d2bcgy\_ d3doea1 d3cona\_ d3rega\_ d3wyga\_ d1upta\_ d2b6ha1 d1zd9a1  
d1lnza2 d1r5ba3 d1n0ua2 d1r2qa\_ d2f91a1 d2rhda\_ d3q3jb\_ d3q85a\_  
d1efma1 d1r8qa\_ d2gf9a1 d2akab1 d1ek0a\_ d1z08a1 d2gcoa1 d2dy1a2  
d4g01b\_ d2cxa1 d1svia\_ d3q72a\_ d1ni3a1 d4ac9a4 d2erxa1 d2bmea\_  
d1wxqa1 d2gf0a1 d4ldja1 d1zunb3 d1d5ca\_ d4lv5b\_ d1efca3 d1kmqa\_  
d2g6ba1 d3lrpa\_ d1tada2 d2y8ea\_ d4rd4a1 d1z06a1 d2heia\_ d3a58b\_  
d1u0la2 d1d2ea3 d1zj6a1 d2ocba\_ d3rwoa\_ d1mr3f\_ d2e9sa1 d4u5xa1  
d2iwra\_ d2fn4a1 d3bwdd\_ d2nzja1 d2atva1 d2ksqa\_ d3l43a\_ d1mkya2  
d1mkya1 d1wmsa\_ d1jnja3 d2rmka\_ d1f6ba\_ d1f60a3 d1gota2 d1jala1

d2fh5b1 d1g16a\_ d2wblc\_ d1m7ba\_ d1wf3a1 d1f5na2 d1t9ha2 d1z6xa1  
d1z0aa1 d2fg5a1 d2a5ja1 d2bcjq2 d1s0ua3 d1ky3a\_ d4y0va\_ d4lhwa\_  
d2qmea1 d2atxa1 d1egaa1 d1ryha\_ d1moza\_ d1nrjb\_ d2erya1 d3bfka\_  
d1puia\_ d3j3az1 d3t5ga\_ d1shza2 d3defa\_ d2f7sa1 d3raba\_ d3tsoa\_  
d3aq4a\_ d2a17a1 d3sfva1 d3bc1a\_ d2ncda\_ d1sdma\_ d3h4sa1 d2heha\_  
d2grya\_ g3kin.1 d1br2a2 d1goja\_ d1f9va\_ d2mysa2 d1lkxa\_ d3t0qa\_  
d4dbl1a1 d3gbja\_ d1ry6a\_ d1v8ka\_ d1kb0a1 d1k8ka2 d1k8ka1 d3uleb1  
d3i33a2 d3i33a1 d1bupa1 d1dkgd2 d1dkgd1 d4ci6a2 d1jcfa1 d4a2ba2  
d2fxua1 d1yaga2 d1yaga1 d4cbua2 d1bupa2 d3vrda1 d3vrda2 d1fcdc1  
d1h1oa2 d1h1oa1 d1m70a2 d1m70a1 d1ig8a1 d1czan2 d1czan3 d1czan1  
d1ig8a2 d1czan4 d1bg3a3 d1bg3a2 d1bg3a1 d1nira1 d1qksa1 d1hroa\_  
d4gedb\_ d3zooa\_ d1mz4a\_ d1gu2a\_ d1f1fa\_ d1dvva\_ d1c6ra\_ d1c75a\_  
d1e29a\_ d1gdva\_ d1cnoa\_ d1h32b\_ d1co6a\_ d2bh4x\_ d2aiua\_ d5cytr\_  
d1jdl1a\_ d1i8oa\_ d2zboa\_ d3dmia\_ d1ls9a\_ d1wvec\_ d2yk3a\_ d3ph2b\_  
d1dw0a\_ d5aura\_ d1ql3a\_ d1qn2a\_ d1f1ca\_ d2nqya\_ d1h4ga\_ d1hixa\_  
d1oa2a\_ d1olra\_ d3b7ma\_ d4h7ma1 d3wp3a\_ d2vgda\_ d1ligoa\_ d3zsea\_  
d2nlra\_ d3wx5a\_ d1oa3a\_ d1pvxa\_ d1m4wa\_ d1f5ja\_ d1oa4a\_ d1ks5a\_  
d4ix1a1 d2a6za1 d3a4ua\_ d2a6va1 d2ah2a1 d1n1ta1 d1evsa\_ d1cnt1\_  
d1pvhb\_ d1z7ca\_ d1huwa\_ d1bgea\_ d1f6fa\_ d1f45b\_ d1i1rb\_ d1axia\_  
d1letea\_ d3tgxb\_ d1scfa\_ d2z3qa1 d3qb1a\_ d1hula\_ d1m48a\_ d4nkqb\_  
d1eera\_ d1v7mv\_ d5e4ea\_ d2o27a\_ d3b5ka\_ d2psma1 d4zf7a\_ d3uf5a\_  
d4x51a\_ d1d9ca\_ d4ypgc1 d3oq3a\_ d1lqsl\_ d1n1fa\_ d1wu3i\_ d3bes1\_  
d3ux9a\_ d2ejca\_ d3muea1 d1lihoa\_ d3q12a1 d4dnxa2 d1m8pa2 d1v47a2  
d1g8fa2 d1x6va2 d3rbaa\_ d2qtra\_ d1nupa\_ d3l92a\_ d1f9aa\_ d1qjca\_  
d2h29a\_ d1vlha\_ d1od6a\_ d1lw7a1 d1mrza2 d4ruka\_ d2el7a\_ d1iq0a2  
d1irxa2 d1r6ta2 d2cyba\_ d1rqga2 d1j09a2 d2yxna\_ d1f7ua2 d1h3fa1  
d1ffya3 d2g36a1 d1nzja\_ d1jila\_ d1n3la\_ d1i6la\_ d1pfva2 d1h3na3  
d3n9ia\_ d3sz3a1 d1m4la\_ d2bk7a\_ d3fjua\_ d1z5ra1 d1kwma1 d1uwya2  
d1jqga1 d2c1ca1 d1dtda\_ d1h8la2 d3sw2a\_ d1moxc\_ d1dx5i3 d1ledmb\_  
d1aut12 d1aut11 d1nqlb\_ d1dva11 d1szba2 d1kigl\_ d2y5fl\_ d1ijqa2  
d1gk5a\_ d1g1sa2 d1nt0a3 d1xdtr\_ d1lmja2 d1lmja1 d1nzia2 d2wphe\_  
d1klil\_ d1pfx12 d1pfx11 d1p9ja\_ d1g1ta2 d1f7ea\_ d4yzub\_ d1nuba2  
d1qx2a\_ d2y5ia\_ d1qlsa\_ d1psra\_ d3n22a\_ d2egda\_ d4ggfc\_ d2wcea\_  
d2luca\_ d4aqia\_ d3nsia\_ d2lp3a\_ d1j55a\_ d1a4pa\_ d1nsha\_ d1pvaa\_  
d3fs7a\_ d2pvba\_ d1ttxa\_ d1rwya\_ d2kyfa\_ d1rk9a\_ d1a75a\_ d1exra\_  
d1tiza1 d1nyaa\_ d1g8ia\_ d1ggwa\_ d1wdcc\_ d3fwba\_ d1ggza\_ d2o5ga\_  
d1ctaa\_ d1m45a\_ d3i5gc\_ d1sl8a\_ d1fpwa\_ d2scpa\_ d2roaa\_ d4aqra\_  
d3pn7b\_ d1br1b\_ d2mysb\_ d1s6ca\_ d1bjfa\_ d2obha\_ d1jfka\_ d1jf0a\_  
d1qv0a\_ d1lkja\_ d2mlfc\_ d2m97a\_ d2d8na\_ d4by5a\_ d1jbaa\_ d4nqga\_  
d1wdcb\_ d2mysc\_ d1j7qa\_ d1s6ia\_ d1uhka2 d1r2ua\_ d1dtla\_ d3kf9a\_  
d3pn7c\_ d1y1xa\_ d1hqva\_ d1dvia\_ d1df0a1 d1qxp2a\_ d4usla\_ d1k94a\_  
d1wkya2 d1uuqa\_ d3wh9a\_ d4m1ra\_ d1xyza\_ d4xuya\_ d2je8a5 d4bf7a1  
d3cuia\_ d1ur4a\_ d1qw9a2 d1odza\_ d2vzsa5 d1bqca\_ d2x2ya1 d1hjqa\_  
d1qnra\_ d4y7ea1 d1vjza\_ d4k68a\_ d2v3ga\_ d4hpga\_ d1nofa2 d1nq6a\_



d1h4pa\_ d1aq0a\_ d3ziza\_ d4bs0a\_ d1ecea\_ d1h1na\_ d1ta3b\_ d1w91a2  
d1i1wa\_ d1uhva2 d1us3a2 d1legza\_ d7a3ha\_ d1tvna1 d3nyda1 d1ghsa\_  
d2cyga1 d4xv0a\_ d2c8na2 d1w32a\_ d3emca\_ d1v6ya1 d1foba\_ d2uwfa1  
d2fgla\_ d3niya1 d2c0ha1 d1rh9a1 d1yq2a5 d1szna2 d1fa2a\_ d1pama4  
d5do8a1 d1ea9c3 d1hx0a2 d2fhfa5 d1qhoa4 d1avaa2 d1m53a2 d4m8ua1  
d2gjpa2 d1lwha2 d4howa1 d1ktba2 d1j0ha3 d3vm5a1 d2x1ia\_ d1wzaa2  
d1uasa2 d2diea1 d1mxga2 d1ht6a2 d1eswa\_ d1iv8a2 d5cpsa\_ d1ud2a2  
d1zjaa1 d3gbea1 d1kwga2 d1wdpa\_ d1gcya2 d1g5aa2 d1hvx2a\_ d3dhpa2  
d2bhua3 d4do4a1 d3qgva1 d1e43a2 d1g94a2 d2d3na2 d1gjwa2 d1gvia3  
d1x1na1 d1r7aa2 d1tz7a1 d3ljqa\_ g1k2x.1 d1etob\_ d1umqa\_ d1g2ha\_  
d1mixa2 d1e5wa2 d1j19a2 d1isna2 d2a16b2 d3syxa1 d1mkea1 d2p8va\_  
d1xoda1 d1i7aa\_ d1evha\_ d1qc6a\_ d1xl4a1 d1n9pa\_ d3vsqa\_ d2gixa1  
d2v76a\_ d1wj1a1 d1aqca\_ d1qqga2 d1ntva\_ d1n3ha\_ d4dbba\_ d3f0wa1  
d1p3ra\_ d1wgua1 d2cy4a1 d3hqca\_ d1wvha1 d1xr0b1 d1wgqa1 d1v89a1  
d2coda1 d1zc3b\_ d1wg7a1 d1u5ea1 d1v61a1 d2coca1 d2ys1a1 d1v5pa1  
d1ntya2 d1wjma1 d1wi1a1 d1u29a\_ d1xx0a1 d1unqa\_ d2zkmx3 d1fhoa\_  
d1v88a1 d2adza1 d1x1fa1 d1p6sa\_ d2coaa1 d1btka\_ d1v5ma1 d1faoa\_  
d2x18a\_ d1dyna\_ d1x1ga1 d4kaxb\_ d2j59m1 d1ki1b2 d1xcga2 d1txda2  
d1u5da1 d1dbha2 d1w1ha\_ d1upqa\_ d1v5ua1 d1foea2 d2fjla1 d1eaza\_  
d2dfka2 d2cofa1 d1kz7a2 d91dta1 d2ewda3 d1up7a1 d2dfda1 d1s6ya1  
d1vjta1 d7mdha1 d1hyea1 d1t2da1 d1ojsa3 d1b8pa1 d1ldna1 d1hyha1  
d1civa1 d2a92a1 d1ez4a1 d1i0za1 d1y6ja1 d1gv0a1 d1ur5a1 d1lllda1  
d1obba1 d1npya1 d3t4ea2 d1a4ia1 d1o0sa1 d2hk9a2 d2egga2 d1b26a1  
d1bvua1 d1gq2a1 d1c1da1 d1leha1 d1gtma1 d1euza1 d1nvtal d3dona2  
d1ledza1 d1gpja2 d1p77a1 d1nyta1 d1b0aa1 d1vl6a1 d1v91a1 d3wdpp1  
d3wq5a\_ d4gxpa\_ d4hz8a\_ d1e4mm\_ d3aiua\_ d1wcga1 d1qvba\_ d3ahxa\_  
d1v02a\_ d2dgaa\_ d1pbga\_ d1vffa1 d1qoxa\_ d4ha4a\_ d1kola2 d1f8fa2  
d1qora2 d1jqba2 d1vj0a2 d1cdoa2 d1gu7a2 d1d1ta2 d1xa0a2 d2dm6a2  
d1jvba2 d1rjwa2 d1llua2 d1h2ba2 d1tt7a2 d1piwa2 d1o89a2 d1iz0a2  
d1e3ja2 d1yb5a2 d1uufa2 d1e3ia2 d3gpdg1 d1vc2a1 d2nvwa1 d1u8fo1  
d1ydwa1 d1hdgo1 d2g17a1 d1cf2o1 d2czca2 d1r0ka2 d1lobfo1 d2cvoa1  
d1ebfa1 d1h6da1 d1i32a1 d1zh8a1 d2q49a1 d1qkia1 d1j5pa4 d3pzra1  
d1xeaa1 d1vkoa1 d1vm6a3 d3qvsa1 d2pkqo1 d1b7go1 d1gr0a1 d1p1ja1  
d1lc0a1 d1j0xo1 d3pwka1 d2hjsa1 d1zyao1 d1vkna1 d1t1ta1 d1nvmb1  
d3sjua\_ d3ojfa1 d1xu9a1 d2jjya1 d1n7ha\_ d1y1pa1 d1h5qa\_ d1jtva\_  
d4fs3a\_ d2bkaa1 d1gy8a\_ d2c5aa1 d1ulsa\_ d1ooea\_ d2b69a1 d1y5ma1  
d1spxa\_ d1aela\_ d1bxka\_ d1ydea1 d1gega\_ d1hdoa\_ d1o5ia\_ d1e6ua\_  
d1snya1 d2rhca\_ d3zv4a\_ d5ceja\_ d2d1ya1 d1fjha\_ d3w8ea\_ d2fmua1  
d1x1ta\_ d1rpna\_ d3ay7a1 d1k2wa\_ d1eq2a\_ d2hrba1 d3ruaa\_ d2ew8a1  
d4hwka\_ d1xgka\_ d2bd0a1 d1yo6a1 d2a35a1 d2ntva\_ d1vl8a\_ d1hdca\_  
d4bkua\_ d2ag5a1 d2q45a\_ d1nffa\_ d4iy1a\_ d1zbqa1 d1kewa\_ d1ek6a\_  
d1ja9a\_ d2q46a2 d1iy8a\_ d1cyda\_ d2ptga\_ d1hxha\_ d1uzma1 d3lyla\_  
d4m89a\_ d3weya\_ d2b1la1 d1w6ua\_ d1sb8a\_ d2q2va\_ d4nr0a\_ d1e6wa\_  
d2gasa\_ d3oiga1 d2bgka1 d1mxha\_ d1vl0a1 d1rkxa\_ d1r6da\_ d1wmaa1

d1e7wa\_ d2c07a1 d1xkqa\_ d3tzha\_ d1g0oa\_ d3lz6a\_ d1qyca\_ d1edoa\_  
d1gz6a\_ d1oc2a\_ d1t2aa\_ d1zema1 d2xoxa\_ d1z45a2 d1geea\_ d1p33a\_  
d3lt0a\_ d4e6pa\_ d2wyua\_ d1db3a\_ d4q9na\_ d1xhla\_ d4o1ma\_ d1fmca\_  
d2uvda\_ d2gdza1 d1uaya\_ d2z1ma\_ d2o23a2 d2fr1a2 d2fr1a1 d1qsga\_  
d1qyda\_ d4zjua\_ d2a4ka1 d1yb1a\_ d1wvga1 d1yxma1 d3f4ba\_ d1xg5a1  
d1r55a1 d3gboa\_ d1atla\_ d1kufa\_ d1buda\_ d4q1la\_ d1quaa\_ d1yp1a\_  
d1wnia\_ d4ekfa\_ d2ckga\_ d1th0a\_ d2bkra\_ d4c5pa\_ d2bsza1 d4bgfa\_  
d1w4ta1 d1mdwa\_ d1qxp4 d1ziva1 d1zcm1 d3ioqa\_ d1fh0a\_ d1o0ea\_  
d1m6da\_ d2cb5a\_ d1cs8a\_ g8pch.1 d1s4va\_ d2pnsa\_ d1vsna1 d1mira\_  
d1iwda\_ d2oula\_ d7pcka\_ d3bwka\_ d3bcna\_ d2p86a\_ d1pvja\_ d1pcia\_  
d1gece\_ d1deua\_ d4bs6a\_ d1xkga1 d1cqda\_ d1jqpa2 d2c0ya\_ d2bdza\_  
d3p5ua\_ d1zoya1 d1qo8a2 d1d4ca2 d1chua2 d1kf6a2 d2jk6a2 d2jk6a1  
d1fecal d1fecal d1lpfa1 d1lpfa2 d1xhca1 d1xhca2 d1dxla2 d1dxla1  
d1gera2 d1m6ia2 d1onfa1 d1onfa2 d3lada2 d3lada1 d1w4xa1 d1w4xa2  
d1mo9a1 d1xdia1 d1f12a2 d1f12a1 d1fcda1 d1fcda2 d1h6va2 d1h6va1  
d1mo9a2 d1gv4a2 d1gv4a1 d2gv8a2 d2gv8a1 d1aoga1 d1aoga2 d1hyua1  
d1ebda1 d1ebda2 d3dk9a1 d1q1ra2 d1q1ra1 d1gesa1 d1pv8a\_ d1w5qa\_  
d2c1ha\_ d1ohla\_ d1zbfal d2z1ha\_ d2etja1 d3qioa1 d1j11a\_ d2e41a\_  
d1j12a\_ d21sna1 d1io2a\_ d1uaxa\_ d2yv0x\_ d1mu2a1 d1lekea\_ d1i39a\_  
d1ps9a2 d1o94a2 d1lqta1 d1pn0a1 d1reoa1 d1ju2a1 d2f5va1 d3c96a1  
d2gmha1 d1pj5a2 d1gpea1 d1o5wa1 d1n4wa1 d2dw4a2 d2ivda1 d1seza1  
d2voua1 d1kdga1 d2bcgg1 d2bcgg2 d2d5ra1 d1iuka\_ d2csua1 d3q9ub\_  
d2yv1a1 d3q9na\_ d2d59a\_ d1oi7a1 d2yv2a1 d1euca1 d1y81a1 d3nvva1  
d1krha3 d2h88b1 d1n62a2 d1t3qa2 d1zoyb1 d1jq4a\_ d1ffva2 d1dgja2  
d1rm6c2 d1r7ha\_ d1faaa\_ d1wika1 d1xfla\_ d1ttza1 d2f51a1 d1ti3a\_  
d1sena\_ d2i4aa\_ d1ep7a\_ d1zmaa1 d1fo5a\_ d3lefa1 d3diea1 d2yana1  
d1z6na1 d1oaza\_ d3zywa1 d4aj8a\_ d1nm3a1 d4fiwa\_ d1wmja\_ d4hs1a1  
d1iloa\_ d1xwaa1 d1wjka1 d2vmla\_ d1fb6a\_ d1gh2a\_ d1h75a\_ d1nw2a\_  
d1kx5b\_ d3a6na\_ d4m6ba2 d2nqbd\_ d3wkjd\_ d2yfwe\_ d4h9na\_ d5bnxa\_  
d1kx5c\_ d3r45a\_ d1eqzb\_ d4jjnb\_ d1f66c\_ d1eqza\_ d4wnnb\_ d1kx5a\_  
d1u35c1 d1id3a\_ d2nqbc\_ d1kx5d\_ d1ku5a\_ d1b67a\_ d1tafa\_ d1bh9b\_  
d1tafb\_ d1q9ca\_ d1h3ob\_ d2byka1 d1n1ja\_ d4g92b\_ d1bh9a\_ d1jfia\_  
d1h3oa\_ d2bykb1 d1n1jb\_ d1pd212 d1nhya2 d2a2ra2 d1k0dd2 d1f2ea2  
d1gsua2 d1f3ba2 d2fhea2 d2pvqa1 d1tw9a2 d1oyja2 d1e6ba2 d1k0ma2  
d3ik7a1 d4is0a1 d1r5aa2 d1jlva2 d1m0ua2 d3gtub2 d1z9ha2 d1okta2  
d1axda2 d2gsra2 d1tu7a2 d1k3ya2 d1zgma1 d1b48a2 d1gnwa2 d1gwca2  
d2gsta2 d1glqa2 d1oe8a2 d1pn9a2 d1v2aa2 d1fw1a2 d1duga2 d1g7ea\_  
d1novc\_ d2bbvc\_ d1qsaa2 d1sefa\_ d1sfna\_ d1rc6a\_ d1qqya\_ d1gd6a\_  
d1f6ra\_ d1livma\_ d2gv0a\_ d1iiza\_ d2z2fa\_ d1j8xa\_ d1ghla\_ d1b9oa\_  
d1691a\_ d2o4wa\_ d1p37a\_ d1k28a3 d1xjta1 d1jtma\_ d2f2qa\_ d4e97a1  
d1g4ma1 d1g4ma2 d1iyka2 d1iyka1 d1rxta1 d1iica2 d1mpya2 d1kw3b2  
d1kw3b1 d4ghga1 d1tfza1 d3isqa1 d3isqa2 d1sqia1 d1sqia2 d1lkda2  
d1lkda1 d1mpya1 d1cjxa2 d1sp9b2 d1t47a1 d1t47a2 d1flua2 d1sp8a1  
d1sp8a2 d1flua1 d1f74a\_ d3l21a\_ d2e1da\_ d1to3a1 d1w3ia\_ d1sfla\_

d1n7ka\_ d1vcva1 d4imea\_ d1wa3a\_ d2ocza1 d1f2ja\_ d3m16a\_ d2yxga\_  
d1ub3a\_ d3a5fa\_ d1fbaa\_ d1l6wa\_ d1xfba1 d1wx0a1 d1vpxa1 d1ojxa\_  
d1mxsa\_ d2a4aa1 d1xkya1 d3cq0a1 d3s1xa\_ d1f05a\_ d1fdja\_ d3cpra1  
d4d2ja\_ d4iuua3 d4bvva\_ d5hpga\_ d3k65a\_ d1ki0a3 d1ki0a2 d1ki0a1  
d1a0ha1 d1pmla\_ d3sp8a3 d2feba1 d1qsta\_ d2beia1 d4m3sa\_ d1u6ma1  
d1ygha\_ d1yk3a1 d3dr6a\_ d1xmta\_ d1z4ea1 d2ge3a1 d1bo4a\_ d2fiaa1  
d2jdca1 d1y9wa1 d3to7a\_ d1wwza1 d2fl4a1 d2ozua1 d2b5ga\_ d2cy2a1  
d2p0wa\_ d1cm0a\_ d4pswa\_ d1yrea1 d1yr0a1 d1m4ia\_ d2gana1 d1yvka1  
d1ghea\_ d2g3aa1 d1y7ra1 d2euia1 d1q2ya\_ d2fsra1 d1xeba\_ d2ae6a1  
d1qsma\_ d2aj6a1 d1y9ka1 d1i12a\_ d1vkca\_ d2atra1 d1n71a\_ d2d4pa1  
d2fiwa1 d2fe7a1 d1tiqa1 d2ou2a\_ d1yx0a1 d2fcka1 d1p0ha\_ d2j8ma\_  
d2pq8a\_ d1z4ra1 d1s3za1 d1ufha\_ d1c7ga\_ d2v1pa1 d2ez1a\_ d2hqya1  
d2hqya2 d1lrza2 d1lrza3 d1ne9a2 d1f37b\_ d1xvqa1 d1pn0a2 d3hy2a\_  
d2cvba1 d1o8xa\_ d1lu4a\_ d1we0a1 d2bmx1 d2a4va1 d1psqa\_ d1xiya1  
d1q98a\_ d1n8ja\_ d1zofa1 d2ggta\_ d3tjja\_ d4je1a1 d1o73a\_ d3s9fa\_  
d2zcta\_ d1qmva\_ d1jfua\_ d2b1ka\_ d5dvba1 d2b5xa1 d2v2ga\_ d1st9a\_  
d3tb2a\_ d4llra\_ d4fh8a1 d1e2ya\_ d2h30a\_ d1i5ga\_ d2z9sa\_ d2f8aa1  
d1tp9a1 d2b7ka\_ d1nm3a2 d3hvva\_ d2wfca1 d4kcea\_ d1xvwa1 d4gqca1  
d3qpm1 d4k1fa\_ d1zzoa1 d1gp1a\_ d1prxa\_ d1e88a1 d1l6ja5 d1l6ja4  
d1eaka4 d1eaka3 d1l6ja3 d1h8pa2 d1ys1x\_ d4hs9a\_ d1lspa\_ d1ku0a\_  
d3qmma\_ d1ra6a\_ d1muka\_ d3gsza\_ d1khva\_ d1te9a\_ d2xwha\_ d3uqsa\_  
d3hkwa\_ d3n6ma\_ d2cjqa\_ d2xyma\_ d1teba\_ d1te8a\_ d1s48a\_ d1u09a1  
d4wfxa\_ d3tyqa\_ d2pgga1 d2h1ia1 d2r8ba1 d3b5ea1 d3cn9a\_ d1auoa\_  
d1lgya\_ d4l3wa\_ d1gz7a\_ d1lukca\_ d1jlia\_ d2rhwa\_ d2ftba\_ d1pmpa\_  
d2rcqa1 d1fdqa\_ d4lkpa\_ d1sa8a\_ d1vyfa\_ d1lpja\_ d3vg7a1 d4azqa1  
d1o8va\_ d5bvqa\_ d1p6pa\_ d2qo4a\_ d1opba\_ d1yiva1 d1o1va\_ d4bvma1  
d4tkba\_ d4i3ba\_ d1bwya\_ d1ftpa\_ d1ggl1 d4gkca\_ d1cbia\_ d3p6da1  
d1kqwa\_ d2a0aa1 d3zxha\_ d1cgla\_ d1rm8a\_ d1eaka2 d1hy7a\_ d2jsda\_  
d1cxva\_ d1hv5a\_ d1i76a\_ d1eb6a\_ d3p0ya1 d1igra1 d1igra2 d1n8yc2  
d1n8yc1 d1m6ba2 d1m6ba1 d1dzka\_ d4tlja\_ d2a2ua\_ d4wfv1 d3t1da\_  
d4iaxa\_ d3zq3a\_ d2nnda\_ d1i4ua\_ d1kxoa\_ d1bbpa\_ d1kt7a\_ d1exsa\_  
d3s26a1 d1lf7a\_ d1qfta\_ d4gh7a\_ d1z24a1 d1qabe\_ d1xkia\_ d1ew3a\_  
d3bx7a\_ d4iawa1 d1n0sa\_ d1gkab\_ d3kzaa\_ d2k23a\_ d2l9ca1 d2joza1  
d1gm6a\_ d3kffa\_ d3saoa1 d1e5pa\_ d1yupa1 d1iiua\_ d2tbvc\_ d1c8nc\_  
d1x36a\_ d1smvc\_ d1ng0c\_ d4sbvc\_ d1lopa\_ d1f2nc\_ d1ddla\_ d1e57b\_  
d1auyb\_ d1f15b\_ d1za7a\_ d1laja\_ d1rypd\_ d1irua\_ d1rypc\_ d3unfk\_  
d1rypa\_ d1j2pa\_ d1irui\_ d1j2qh\_ d3unfh\_ d1m4ya\_ d1rypb\_ d1lirul\_  
d1lirug\_ d1liru2\_ d1q5rh\_ d1rypg\_ d1g3ka\_ d1liruf\_ d1q5qa\_ d1e94a\_  
d1lirub\_ d1ryph\_ d3ty6a\_ d1liruj\_ d1liruk\_ d1rype\_ d1lirud\_ d1lirue\_  
d3mi01\_ d1rypf\_ d2z3ba\_ d1liruc\_ d3mka2\_ d1liru1\_ d1jgta2 d1ofda3  
d1ea0a3 d1q15a2 d1ct9a2 d1ao0a2 d1te5a\_ d1p8ba\_ d1eixa\_ d3exra\_  
d2ffca1 d2fdsa1 d3n3ma1 d2czda\_ d1q6oa\_ d2yyua\_ d1vqta1 d3ldva1  
d2r80b\_ d1cqxa1 d1gcvb\_ d3boma\_ d2h8fb\_ d2raoa\_ d3bj1a\_ d4hrrb\_  
d2r50a\_ d3d1kb\_ d2aa1b1 d3zhwa\_ d3hf4b\_ d3gdja\_ d1jebb\_ d3bj1b\_

d1x9fb\_ d1wmub\_ d1gcva\_ d3bcqb\_ d3d4xb\_ d1gvha1 d2dc3a\_ d3hf4a\_  
d4yu3a\_ d3k8ba\_ d1qpwb\_ d2r80a\_ d3bcqa\_ d1v4wa\_ d3wtgb\_ d1jl7a\_  
d4esaa\_ d1a9we\_ d3d1ab\_ d1fsla\_ d4h21a\_ d1v4wb\_ d1mwca\_ d1vhba\_  
d1jeba\_ d1spgb\_ d1h97a\_ d1q1fa\_ d1tu9a1 d3d1aa\_ d1hdsb\_ d3hyub\_  
d2zfb\_ d3fs4a\_ d1oj6a\_ d1shrb\_ d4h21b\_ d4yu3b\_ d1spga\_ d3hrwa\_  
d3qqra\_ d3at5a\_ d4wchd\_ d3hyua\_ d1cg5b\_ d1uc3a\_ d1hbra\_ d2raob\_  
d1outb\_ d4esab\_ d3gdjb\_ d3qqqa\_ d1x9fc\_ d3vrfa\_ d1litha\_ d3mkba\_  
d3d4xa\_ d3mjpa\_ d1jl6a\_ d3fh9a\_ d1outa\_ d2dc3b\_ d1lit2a\_ d3eoka\_  
d3g46a\_ d1qpwa\_ d3vrfb\_ d1ch4a\_ d1x9fd\_ d1hdsa\_ d2zfa\_ d3mkbb\_  
d1or4a\_ d3wtga\_ d1a4fa\_ d3fh9b\_ d3bomb\_ d3cy5a\_ d3at5b\_ d1x9fa\_  
d2oifa\_ d4lmb\_ d1cpcb\_ d3v57a\_ d1kn1a\_ d1cpca\_ d4f0ta\_ d2vjha\_  
d4po5b\_ d1eyxa\_ d1alla\_ d4f0tb\_ d1b33b\_ d1b8db\_ d4h0mb\_ d2vjhb\_  
d4lmb\_ d2vmlb\_ d1allb\_ d2vjta\_ d3dbja\_ d2vmla\_ d2vjtb\_ d4f0ub\_  
d1f99b\_ d4rmpa1 d1liaa\_ d1eyxb\_ d2uulb\_ d4lmsb\_ d4f0ua\_ d2bv8a\_  
d1f99a\_ d2bv8b\_ d2c71b\_ d3dbjb\_ d4rmpb1 d1b8da\_ d4h0ma\_ d3v57b\_  
d1kn1b\_ d1liab\_ d2uula\_ d2j96a\_ d1xd3a\_ d3ifwa\_ d1gl9b1 d1gkub2  
d1b9ra\_ d1offa\_ d1frra\_ d3wcqa\_ d1l5pa\_ d1wria\_ d1i7ha\_ d3av8a\_  
d1czpa\_ d1rfka\_ d3plma1 d3b2ga\_ d2bt6a2 d1s5ja2 d1qhta2 d4dlea2  
d1tgoa2 d3py8a2 d1q8ia2 d1kfsa2 d2py5a2 d1dosa\_ d3qm3a1 d2fjka\_  
d2m5ta\_ d1wqsa\_ d5bpea\_ d2ipha\_ d1lvoa\_ d2bhga1 d3tnta\_ d3sjia\_  
d3d23a1 d2fyqa\_ d3tloa\_ d3zvea1 d2hrva\_ d3q3ya1 d4asha1 d4mh8a\_  
d1mu2a2 d4i7ga1 d3rp2a\_ glucy.1 d1fuja\_ d2zchp\_ d3w94a\_ d1si5h\_  
d1lo6a\_ g2pka.1 d1cgha\_ d1kigh\_ d1a5ia\_ d3s9ba\_ d1hj8a\_ d1ao5a\_  
d2anya\_ d1q3xa1 d1gvza\_ d1azza\_ d4gsoa\_ d2f91a1 d1iaua\_ d1gdna\_  
d1eufa\_ g1fiw.1 d1eq9a\_ d4nfea\_ d2rdla\_ d1spja\_ d1elva1 d1a7sa\_  
d1ekbb\_ d1pfxc\_ d1yc0a\_ d2aiqa\_ g1fiz.1 d1fi8a\_ d4k60a\_ d4dgja\_  
d1mzaa\_ d1op0a\_ d3tjva\_ d1pytd\_ d1sgfg\_ g1gg6.1 d2eeka\_ g1rtf.1  
d1a0ja\_ d3g01a\_ d1pytc\_ d4e7na\_ d1ddja\_ d1z8ga1 d2hlca\_ d1npma\_  
d1brup\_ g1jou.1 d1sgfa\_ d1autc\_ g2hnt.1 g1kdq.1 d1orfa\_ d3s69a\_  
d4crga\_ d1fxya\_ d1svpa\_ d1mbma\_ d3su6a1 d1cula1 d4agka\_ d1vcpa\_  
d1q31a\_ g1n11.1 d3e90b\_ d1ep5a\_ d3u1jb\_ d3gv5b1 d1t94a2 d3bq0a2  
d3lgia\_ d3i77a\_ d2z9ia2 d4nsva\_ d1lcya2 d4jcna\_ d1agja\_ d1os8a\_  
d1hpga\_ d1p3ca\_ d1l1ja\_ d1qtfa\_ d1e69a\_ d1mv5a\_ d3g60a4 glii8.1  
d1ewqa2 d1ji0a\_ d1qhla\_ d1v43a3 d2wmfa1 d1vpla\_ d1g2912 d4a82a2  
g1f2t.1 d2d62a1 d3tuic1 d2bbsa1 d3g60a3 d2ixea\_ d1g6ha\_ d1sgwa1  
d2qi9c\_ d3rlfa1 d3b60a1 d3d31a2 d2pzea1 g1xew.1 d1jj7a\_ d1oxk2  
d2onka1 d1wlwa\_ d1iwea\_ d1qf5a\_ d1vmaa2 d1nija1 d1np6a\_ d2p67a1  
d3ihla\_ d1okkd2 d1ls1a2 d1slma2 d1liona\_ d2v40a\_ d1dj3a\_ d3hida\_  
d2vola1 d2g0ta1 d1vcoa2 d1j8mf2 d1g3qa\_ d1xjca\_ d1p9ba\_ d1qzxa3  
d1ihua2 d1ihua1 d2qm8a\_ d1dj2a\_ d4ioja\_ d1cp2a\_ d1yrba2 d1hyqa\_  
d3gqba2 d1skye3 d1xp8a1 d1tf7a2 d1tf7a1 d1ye8a1 d1skyb3 d2qe7d2  
d4blta\_ d4huta\_ d3l1daa2 d4hyya\_ d2i3ba1 d1cr1a\_ d3j9tb2 d3ntua2  
d1vdza1 d2z43a\_ d1e9ra\_ d1nlfa\_ d3ziaa2 d1n0wa\_ d1g6oa\_ d3ziad2  
d3j9ta2 d1pzna2 d3gqbb2 d2i49a\_ d1nnfa\_ d1xvxa\_ d1ursa\_ d1h3da1

dliuda\_ d4m1va1 d1twya\_ d3e13x\_ d2nxxoa1 d4pfua\_ d3ttma\_ d1elja\_  
d2qmw1a1 d1us5a\_ d1y3na1 d1jeta\_ d1uqwa\_ d4f19a1 d2esna2 d3thia\_  
d3fasa1 d2uyeb\_ d2xwva1 d1r91a\_ d2fyia1 d1pb7a\_ d2ozza1 d1sw5a\_  
d1nh8a1 d1vr5a1 d2g29a\_ d1xs5a\_ d3lswa\_ d2z23a\_ d3w9va\_ d3tcha\_  
d1q35a\_ d1z7me1 d3q27a\_ d1p99a\_ d1ve4a1 d2i6ea1 d4mcoa1 d4n8ya\_  
d1eu8a\_ d1zbma1 d1hsla\_ d1ixca2 d1j1na\_ d1xvya\_ d1y9ua\_ d2z22a1  
d1xoca1 d4oera\_ d1wdna\_ d5f1qa1 d1xt8a1 d4gwoa\_ d4igta1 d1pc3a\_  
d4mmpa1 d1o63a\_ d2czla1 d2onsa2 d4mija1 d4ok5a1 d2bmfa1 d2bmfa2  
d1yksa1 d1yksa2 d1jr6a\_ d2qeqa1 d2j1qa1 d1a1va2 d1eh3a\_ d3skpa\_  
d1dtza1 d1ieja\_ d1jnfa2 d1ce2a1 d1jnfa1 d1b1xa2 d1b1xa1 d1jw1a1  
d1jw1a2 d1ryoa\_ d1h76a1 d1h76a2 d1c4oa1 d2p6ra3 d2p6ra4 d1oywa2  
d1oywa3 d1wrba1 d1w36b2 d1w36b1 d1c4oa2 d3bora\_ d1t6na\_ d2eyqa5  
d2eyqa3 d2eyqa2 d2zu6a2 d1veca\_ d1uaaa1 d1w36d1 d2g9na1 d1z3ix2  
d2rb4a\_ d1hv8a1 d1hv8a2 d1t5ia\_ d1w36c2 d2j0sa2 d2j0sa1 d1fuka\_  
d3hjha1 d1z5za1 d1qdea\_ d1z63a1 d1s2ma2 d1s2ma1 d1wp9a1 d1wp9a2  
d1gm5a3 d1gm5a4 d3dina4 d3dina3 d1q0ua\_ d1w36c1 d1z3ix1 d1nkta3  
d1nkta4 d1uaaa2 d1w36d2 g1qhh.1 d2fwra2 d2fwra1 d2v8ta\_ d3q3ma\_  
d1za0a1 d1mxra\_ d2inca\_ d1jk0a\_ d2incb\_ d1mhyb\_ d3hf1b\_ d1mtyb\_  
d1r2fa\_ d2uw1a\_ d1mhyd\_ d3n37a\_ d1afra\_ d1oquc\_ d1syya\_ d1mtyd\_  
d2o1za\_ d1uzra\_ d1smsa\_ d2fkza\_ d1zuja1 d1s3qa1 d2fjca1 d1z6om1  
d1veia\_ d4dyya\_ d1jiga\_ d3gvya\_ d2pyba\_ d4cy9a1 d3bvfa1 d1r03a\_  
d2cf7a\_ d1nf4a\_ d1zs3a1 d4iwka\_ d3ka8a\_ d3np0x\_ d1n1qa\_ d1lb3a\_  
d4e6ka\_ d1z6oa1 d2fzfa1 d4dyua\_ d3ge4a\_ d1jgca\_ d4am4a\_ d2z6ma\_  
d1ji5a\_ d1vlga\_ d1lkoa1 d3qz3a\_ d1o9ra\_ d2ffxj\_ d1euma\_ d1yv1a1  
d2v2pa\_ d1j30a\_ d4di0a\_ d1dpsa\_ d2cbia2 d1gqia1 d2choa2 d1oewa\_  
d2qzxa\_ d2asia\_ d1psoe\_ d1miqa\_ d1smra\_ d2h6ta\_ d1pfza\_ d1izda\_  
d3hd8a\_ d1j71a\_ d1dpja\_ d4aa9a\_ d1t6ex\_ g1b5f.1 g1lya.1 g1htr.1  
d1qdma2 d1bxoa\_ d1wkra\_ d1tzsa\_ d1libqa\_ d2qzwa\_ d1bdqa\_ d3ggta\_  
d3ixoa\_ d1mrxa\_ d2haha\_ d1tw7a\_ d4njsa\_ d1sgua\_ d2p3da\_ d1nsoa\_  
d3d3ta\_ d2rkfa\_ d1c6ya\_ d2rspa\_ d3ogpa\_ d3ekwa\_ d2o4na\_ d2j9ja\_  
d1baia\_ d3ggua\_ d3lzua\_ d4npua\_ d4j55a\_ d2r8na\_ d2fxda\_ d2p3ca\_  
d4dqea\_ d3ttpa\_ d3t3ca\_ d2p3aa\_ d2hc0a\_ d2fdda\_ d3mwsa\_ d1h4ra3  
d4y18a1 d2a16a3 d1wgda1 d1wgg1a1 d4q5eb\_ d1wjna1 d1se9a\_ d3n3kb\_  
d1wz0a1 d1we6a1 d2m0xa\_ d2gbka\_ d3rt3b1 d1wh3a1 d1sifa\_ d2ekec2  
d4ii2b1 d4hk2a1 d1c3ta\_ d1m94a\_ d1wgha1 d1ttna1 d1j8ca\_ d1wx8a1  
d3v6cb1 d2ma9b\_ d4i61b1 d1bt0a\_ d2jvca1 d1iyfa\_ d2k1fa\_ d1wxva1  
d1wf9a1 d1t0ya\_ d2io0b2 d1x1ma1 d2gbma\_ d1zw7a1 d2m17a\_ d1ud7a\_  
d1we7a1 d2lwp1a\_ d2g1ja\_ d1wjua1 d1v6ea1 d1v86a1 d4eewa\_ d1wiaa1  
d4icva\_ d4gu2a\_ d1wx7a1 d1wy8a1 d4hjka1 d2faza1 d1v5oa1 d2a13a1  
d2cr5a1 d1wj4a1 d2h0ba\_ d2erfa\_ d1h30a2 d1h30a1 d3mw4a1 d2r1ba\_  
d3v64a1 d1d2sa\_ d3bopa1 d3mw3a1 d1okqa1 d1okqa2 d1s5ja1 d2hbja2  
d2igia\_ d1wlja\_ d1qhta1 d4dlea1 d1tgoa1 d2f96a1 d3tr8a1 d3mxma\_  
d1q8ia1 d1y97a1 d1w0ha\_ d1kfsa1 d2py5a1 d1noya\_ d1d5aa1 d1yt3a3  
d2guia\_ d3mwpa1 d4kb1a\_ d1um8a\_ d1ixza\_ d1qvra2 d1qvra3 d1qzma\_

d1sxjc2 d1jr3d2 d2p65a\_ d1g8pa\_ d3hu3a3 d1sxjd2 d1njfa\_ d1in4a2  
d1sxja2 d1tuea1 d2ce7a2 d1w5sa2 d1sxjb2 d1d2na\_ d1ny5a2 d1ofha\_  
d2gnoa2 d2a5yb3 d1fnna2 d1u0ja1 d1lv7a\_ d1iqpa2 d2fnaa2 d1ixsb2  
d4gita\_ d1sxje2 d1g41a\_ d3ia2a\_ d1a88a\_ d4dgqa1 d1zoia\_ d1e3oc2  
d1lic8a2 d2jccqa\_ d1n9wa1 d1bbua1 d1c0aa1 d1b8aa1 d1l0wa1 d3a74a1  
d1eova1 d1t61c1 d1iyjb4 d1iyjb5 d1iyjb3 d1o7ia\_ d4ipca1 d1x3ea\_  
d4apva\_ d1jb7a1 d1jb7a2 d1jb7a3 d3kdfa\_ d1ue1b\_ d1wjja1 d3eiva\_  
d1xjva2 d1xjva1 d2ccza2 d1se8a\_ d1l1oc\_ d1jb7b\_ d1qvca\_ d3ulla\_  
d1qzga\_ d1miua4 d1miua5 d1miua3 d3g48a1 d1gd7a\_ d1mkha\_ d1jjcb3  
d1pyba\_ d1y14b1 d2nn6i1 d1i94l\_ d2zjra2 d1smxa\_ d2qamc2 d1hh2p1  
d2r7da1 d1rl2a2 d1wfga1 d3bzka4 d1x6oa2 d3a0ja\_ d2j01d2 d2ja9a1  
d4q15a\_ d1hr0w\_ d1luza\_ d2n3sa\_ d2vnud1 d1h95a\_ d1go3e1 d2nn6h1  
d2mo1a\_ d1iz6a2 d1jjga\_ d1e3pa2 d2ix0a3 d2ix0a2 d2lxja\_ d1ueba3  
d1ueba2 d2z0sa1 d1u0la1 d2ix0a1 d2eifa2 d2je6i1 d3i2za1 d2c35b1  
d2ahob2 d1t9ha1 d3i4oa\_ d2qall1 d1jt8a\_ d2nn6g1 d1g6pa\_ d3cama\_  
d1i94q\_ d1c9oa\_ d1d7qa\_ d2ba0a1 d2vnud2 d2vnud3 d1khia2 d2qalq1  
d1wi5a1 d1xtda2 d1ny4a\_ d1pfsa\_ d2a1ka\_ d1je5a\_ d1rpma\_ d2shpa1  
d1yfoa\_ d1l8ka\_ d2ooqa1 d1g4us2 d1p15a\_ d1lara1 d1wcha\_ d2fh7a2  
d2fh7a1 d1ohea1 d1ohea2 d2f4da\_ d1rxda\_ d2hxpa\_ d1xria\_ d1d5ra2  
d1fpza\_ d3ezza\_ d4y2ea\_ d1i9sa\_ d3azya\_ d3wvja\_ d1upsa1 d1ajoa\_  
d2hyka\_ d1ajka\_ d2vy0a\_ d1o4ya\_ d3o5sa\_ d3d6ea\_ d3atga\_ d1dypa\_  
d1umza\_ d3i4ia\_ d1c1la\_ d4lbqa\_ d1a78a\_ d4no4a\_ d3zsja\_ d3duia\_  
d1g86a\_ d1is3a\_ d1qmja\_ d1hlca\_ d1tdha3 d1q3ba3 d1ee8a3 d1k82a3  
g1qmo.1 g1len.1 d3zyra\_ d1fnya\_ d1n47a\_ g21tn.1 d1avba\_ d3usua\_  
d1dhkb\_ d1f9ka\_ d1lukga\_ d1g8wa\_ d1g9fa\_ d1wbfa\_ d3wcsa\_ d1g7ya\_  
g1loe.1 d1mvqa\_ d1hq1a\_ d1v6ia\_ d1dbna\_ d1qnwa\_ d1fx5a\_ d4l8qa\_  
d1ioaa\_ d3n35a\_ d3ubra\_ d1qo8a1 d1d4ca1 d2k3va\_ d1ft5a\_ d1qdba\_  
d2j7aa\_ d1h21a\_ d1ogyb\_ d4fasa\_ d1jnia\_ d1oaha\_ d1sp3a\_ d3h33a\_  
d1rwja\_ d19hca\_ d1os6a\_ d3bxua\_ d3h4na\_ d1i77a\_ d3caoa\_ d1j0pa\_  
d2ctha\_ d1duwa\_ d1ofwa\_ d2e84a\_ d1hh5a\_ d1gyoa\_ d3h34a\_ d1dszb\_  
d1a6ya\_ d3cbba\_ d1ynwa1 d1r4ia\_ d1hcqa\_ d2hana\_ d2hanb\_ d2enva1  
d1kb4b\_ d2n11b\_ d1l0la\_ d1cita\_ d1adqa1 d1fnga1 d1uvqb1 d1zs8a1  
d2vola1 d2vola2 d1mfb12 d2jelh2 d1uwel2 d3qq4b1 d1kjvb\_ d1k5na1  
d1osph2 d4odh12 d1ow0a1 d1ow0a2 d1bfob2 d3l9ra2 d3jtth1 d2fath2  
d4elkb2 d1fn4b2 d2xfxb\_ d1pg7x2 d1cqka\_ d4k71b2 d1l1k2a1 d1eapb2  
d4l1fhg2 d1i4fa1 d2nw2a2 d1kfah2 d1mhca1 d1h3ua1 d1wejh2 d1h0db2  
d1a5fh2 d1kcvh2 d1mjuh2 d1qqda1 d1kcrh2 d1k8ia1 d3huja2 d2nnab1  
d1nfd2 d3mffb2 d1s9va1 d1l1k3h2 d1q0x12 d1fv1b1 d1neza1 d4rfeb2  
d1r3ha1 d1a6tb2 d1kjva1 d1pz5b2 d1onqa1 d2bc4a2 d1de4a1 d1k8da1  
d1tcra2 d1dn0b2 d1nfd2 d2xwtb2 d1bfoa2 d1mexh2 d1iakb1 d1ypzf2  
d4f7ea2 d1q72l2 d2fbjh2 d1fe8h2 d1clzh2 d1fngb1 d1uvqa1 d1vgka1  
d1c16a1 d4j12a2 d4x99b2 d1igtb3 d1je6a1 d1q72h2 d1nldh2 d1teth2  
d2hmic2 d1i1ca2 d1i1ca1 d1k8ib1 d1q0yh2 d1kfa12 d3frua1 d1pg7w2  
d1u58a1 d1igyb4 d1igyb3 d1hyrc1 d1klub1 d1deeb2 d1c12b2 d2bc4b2

d2ig2h2 d1kcvl2 d3wn5b1 d1lk2b\_ d1lk3l2 d1mjul2 d1sm3h2 d1q0xh2  
d1zvsal d1ydpal d1u8ib2 d1ypze2 d1kcuh2 d1lop9a\_ d1y0la1 d1letzb1  
d1legj1l d2gsib1 d1nj9a1 d4jfhd1 d1aqk1l d1t2ja\_ d1l04h1 d1zvyal  
d3v4v1l d4enec1 d1kxtb\_ d5e8ea1 d2pxya\_ d4weud\_ d1xiwc\_ d2esvd1  
d1qznh\_ d1ogae1 d1f4xh1 d4n1hb\_ d3ezjb1 d3mlw1l d1kfah1 d1letza1  
d1b4jh1 d3cfic\_ d4w68a\_ d2arja1 d1ek3a\_ d2ok0l1 d1vera\_ d1uwgh1  
d1blnb1 d1fpth1 d1rzga1 d2giya1 d4m3kb1 d1nc2a1 d2nyyd1 d1ncna\_  
d1fbih1 d5dxwa\_ d4fqqa1 d1dqdh1 d1jfq1l d1kelh1 d1faih1 d1frgl1  
d1fig1l d4m6n1l d1fo0a\_ d4hxb1l d3b5ga\_ d3quyd1 d2h9gb1 d1i8kb\_  
d2dd8h1 d2ck0h1 d1eaja\_ d4w6wb1 d2a6ib3 d1t66d1 d2e27h\_ d1ob1b1  
d1f11b1 d2v7na1 d1ad0a1 d2xt1b1 d1pskh1 d4i13b1 d2op4l1 d1a0ql1  
d1uwell d1za3a1 d1ncbl1 d4uu9a\_ d1bm3h1 d1cloh1 d1nqba2 d1cf8h1  
d4y5va\_ d1mhph1 d5anma1 d4cdgc1 d4ldeb\_ d1y0lb1 d2pcpb1 d1z3gl1  
d1dfb1l d1fh5h1 d3g5xa1 d1tzib1 d4dn3l1 d3zhka1 d2b1hh1 d2uyla1  
d1f3dh1 d1nj9b1 d2agjh1 d2h1p1l d1q72h1 d8fabb1 d1ndmb1 d1rjca1  
d4u6hb1 d3upca\_ d2fbj1l d1osph1 d1tvda\_ d2cjvh\_ d4fhbd1 d1bd2d1  
d1rz7h1 d3nn8a\_ d1blna1 d1knoa1 d1nfdal d2bmkb1 d1dq1l\_ d1igyb1  
d1igf1l d12e8h1 d3utza1 d1nc2b1 d1rihh1 d4mwfb1 d4jvpa1 d1mieh1  
d1rhfa1 d1fgn1l d1sbsh1 d1lp9e1 d1dn0a1 d4lqf1l d1iaih1 d1kgcd1  
d1mh5b1 d1gpol1 d2g60h3 d1f8t1l d2jixd1 d4grwh\_ d1fo0b\_ d1bfob1  
d1axsa1 d1u9ka\_ d1nmbh\_ d1h8na1 d1h8na2 d1jguh1 d4eura1 d3sdy1l  
d35c8h1 d1w72l1 d1mvub\_ d1i9rh1 d1ob1a1 d4wenb\_ d1yeeh1 d3ietc1  
d1f58h1 d1ad0b1 d1mqk1\_ d1nbvh1 d4b50a\_ d3r8bb\_ d1baf1l d1mamh1  
d4rgne1 d2gsgb\_ d35c8l1 d1bafh1 d1ailh1 d2pcpa1 d2fath1 d2x1pa\_  
d1orsb1 d1libg1l d1shma\_ d1a2yb\_ d1u0qa\_ d2coqa\_ d1hilb1 d1qfwi\_  
d1jv5b\_ d1fn4b1 d5e0qa\_ d1nsnh1 d1plgl1 d4ocx1l d1kb5h1 d1rzfh1  
d1pg7x1 d2fx7h1 d2oi9c\_ d1l7il1 d3eyva1 d1d5il1 d4ffyl\_ d1tet1l  
d1a6wh\_ d1lac6a\_ d3dvfa\_ d1nfde1 d1mimh1 d1ri8a1 d1jhlh\_ d3dura\_  
d1fskb1 d1f97a1 d3so3b1 d2ak4d1 d1lp9f1 d4z7wf1 d1l7th1 d4y5ya\_  
d4x7ec1 d1emth1 d1ikf1l d1nlbh1 d4uta1l d1bjma1 d1eapb1 d1u6ah1  
d2dtgd1 d1kj2b\_ d1xeda1 d1c1eh1 d1fgvh\_ d2bnub1 d2fb4h1 d2dtgb1  
d1ktrh\_ d1jpth1 d1qkz1l d4hepg\_ d2atpb1 d1flrh1 d2hrp1l d1mvfa\_  
d1iaim1 d3k80a1 d2jb5h1 d3zkxc\_ d4grwe\_ d1it9h1 d1rhhb1 d3w9ec\_  
d1e4wh1 d1sy6h1 d2j6eh1 d3qxta\_ d1jglh1 d1p7ka1 d1tzhb1 d4n8pa1  
d1gaf1l d2jelh1 d1wioa2 d4i0cc1 d1cicb1 d1lmka2 d1lmka1 d1iqwh1  
d1lorqb1 d1ejoh1 d1jnlh1 d4zg1a\_ d43c9b\_ d1ggbl1 d1wejh1 d3q6fa1  
d1f3dj1 d3c6la1 d1bqlh1 d3p9wb\_ d1a3r1l d1h0db1 d2uzil\_ d1eo8l1  
d1qfwl\_ d1n7m1l d1igja1 d1c5ch1 d2a9mh\_ d1rmfh1 d1fj1b1 d4heme\_  
d1ccza1 d1a5fh1 d1ogad1 d1dlfh\_ d1qa9b\_ d1vgel1 d3qskb\_ d1sjxa\_  
d4ozfg1 d1sq2n\_ d1qd0a\_ d1kcvh1 d1c5db1 d3qcul1 d8faba1 d3bn9d1  
d1mjuh1 d4y8dc\_ d7fabh1 d3dvgb1 d1l00l1 d1a6tb1 d1gigh1 d1kcrh1  
d2hwhz1l d1yjdc1 d3clfl1 d4krna\_ d1d17l\_ d1e6o1l d1mexh1 d3r0ma\_  
d4kkna\_ d1fnsl1 d1oaqh\_ d1rzia1 d1lucbh1 d1ncw1l d4b41a\_ d1nfdfl  
d2mpah1 d2d7t1l d4grwf\_ d4b5ea\_ d1lk3h1 d3u79a\_ d4u3xa\_ d1ghfl1

d1bvkb\_ d1mcww1 d1b88a\_ d1jrhh1 d32c2b1 d4wemb\_ d1dsfh\_ d1op3h1  
d1cell1 d1liqda1 d1qoka1 d1qoka2 d1qfuh1 d2crya1 d1ay1h1 d1oaql\_  
d3ab0b\_ d1rur11 d1t4kb1 d1bz7b1 d1n0xh1 d1for11 d1ucb11 d4w6yb\_  
d43c9a\_ d2aab11 d1tzia1 d4n1ca\_ d1k6qh1 d3g9ab\_ d4tvsa1 d1igmh\_  
d1pz5b1 d3dx9a1 d3wxwh\_ d1nakh1 d1kcul1 d3eaka\_ d4qlra1 d1cr9l1  
d1d9ka\_ d1f4x11 d1deea1 d2i27n2 d1c12a1 d2orb11 d1j8hd1 d1mcph1  
d1c5da1 d1kenh1 d1bd2e1 d1h5ba\_ d4x7fc1 d3upaa\_ d1t3fa1 d1indh1  
d2dtgc1 d4hc111 d1zv5a1 d4wgvb\_ d1uwgl1 d4f37k1 d1aqkh1 d1vesa\_  
d3zkqd\_ d1fpt11 d1lo411 d1knob1 d3rrqa\_ d1ct8b1 d4orz\_ d1mlbb1  
d4hgkc1 d1dqdl1 d1bogb1 d4ozhe1 d1dr9a1 d1i7za1 d1dn0b1 d1kell1  
d1rzib1 d1ypzf1 d1wtla\_ d1hkfa\_ d1fail1 d1figh1 d2vyre\_ d1sjva\_  
d1ohqa\_ d1bfoa1 d1pkqb1 d1mjul1 d1b4j11 d1nsl1 d2arjb1 d1p4bh\_  
d4aj0a\_ d3nn8b\_ d2rcja1 d1f2xk\_ d4v1dd\_ d1adqh1 d2eksa\_ d4k3ga\_  
d1jfqh1 d1uweh1 d1frgh1 d4gftb\_ d1uz8b1 d4n1ea\_ d1bm311 d1clo11  
d3mcka1 d2vq1a1 d1ae6h1 d4aq1b1 d1uj3b1 d1nbqa1 d1fh511 d2ck011  
d2ywza\_ d1q7211 d4nxbx\_ d1hila1 d4hz1b1 d2j8811 d1zmya1 d1cd0a\_  
d1a4ka1 d1psk11 d1a0qh1 d4krmb\_ d1ncbh1 d2fbjh1 d1j8he1 d1i3ua\_  
d1cf811 d1fe8h1 d2p1ya1 d1eeqa\_ d2x89a\_ d1ol0a\_ d2r01h1 d1ub5a1  
d1dfbh1 d3eyvb1 d4jdvb1 d4p2cg\_ d2gsia1 d2agj11 d1u3ha1 d2h1ph1  
d1rih11 d1fskc1 d1boga1 d2a7711 d1osp11 d1qfoa\_ d3dwta\_ d2fx711  
d1rz711 d3stba1 d1pkqa1 d1b6da1 d1dzba2 d1dzba1 d1kj2a\_ d4l1ha\_  
d1rzgb1 d1dq1h\_ d12e811 d1miel1 d1jmaa\_ d1sbs11 d1fgnh1 d1f5811  
d1mqkh\_ d1ndgb1 d3qeg11 d1ia11 d2aw2a1 d1tqbc1 d3fo2a1 d4dkaa\_  
d1f8th1 d2g6011 d2ywya\_ d1uj3a1 d1yc7a\_ d3bd3a\_ d4w6xb1 d1nmb1\_  
d1i8ka\_ d1rjlb1 d1ypze1 d1p7kb1 d1kxqe\_ d1gpoh1 d2z4qa1 d1w72h1  
d1i9rl1 d4qgya1 d4xt1c\_ d2qqnh1 d1cica1 d3c08h1 d2cd0a\_ d2bdnh1  
d1hnga1 d1mam11 d1nldh1 d1cr9h1 d4lcih1 d3bkyh1 d3qg711 d1ai111  
d1kxvc\_ d4iosd\_ d1l7ih1 d2x1qa\_ d1ub6b1 d3k74b\_ d1libgh1 d1teth1  
d1igya1 d1hxma1 d2x6ma\_ d2e71a\_ d5e03a\_ d1qfwm\_ d2r0kh1 d1igjb1  
d1rurh1 d1plgh1 d1mj8h1 d1yuhb1 d3fmg11 d1rzfl1 d1emt11 d1ad9b1  
d1igtb1 d1nlb11 d1d5ih1 d3k7ua\_ d4ffyh\_ d1bwwa\_ d3dvga1 d1a6ta1  
d1fgvl\_ d4qxgl1 d1mim11 d1jh11\_ d2hffb1 d2hh011 d1qkzh1 d1l7t11  
d1afvh1 d1iaii1 d2cjuh\_ d1um5h1 d2ghwb2 d2ghwb1 d1kgce1 d2fgwh1  
d1ikfh1 d1dvfd\_ d2i24n1 d2xtjb\_ d1za3b1 d2yc1a\_ d2hh0h1 d2x1oa\_  
d1bvka\_ d1rjla1 d5e7ba1 d1igta1 d1i11b1 d2fb411 d1mvua\_ d1jpt11  
d32c2a1 d1fvca\_ d1liqdb1 d2hrph1 d2p4ab\_ d4qo1a\_ d1p2cb1 d1wt5c\_  
d1t4ka1 d5c1mb\_ d1it911 d1bz7a1 d1b2wh1 d1e4w11 d1jn111 d1yedb1  
d1za6b1 d3u7aa\_ d1ligfh1 d3gnml1 d1orsa1 d1wejl1 d1a2ya\_ d1hxmb1  
d1gafh1 d2j4wh1 d1pz5a1 d1j05a\_ d1a3rh1 d4fq111 d1qfwh\_ d1eo8h1  
d1n7mh1 d4s11a\_ d1kegh1 d5da4a\_ d1iqw11 d3whxb1 d1deeb1 d1c12b1  
d1t2ql1 d1ad9a1 d3gsnb1 d3b2uc1 d1ggbh1 d1t3fb1 d1nak11 d4ocmc\_  
d1lila1 d2v7hb3 d2esve1 d1mcoh1 d2qr0b1 d2q3aa\_ d1ct8a1 d1kcr11  
d2pxyb\_ d2uzih\_ d5c3ld\_ d3durb\_ d1c5c11 d2ak4e1 d1d17h\_ d1xiwd\_  
d1mlba1 d1rmfl1 d1i7zb1 d1dlfl\_ d2xa3a\_ d5bq7b1 d1dqqb1 d3h4211



dlegjh1 d1kcvl1 d1fe8l1 d2j6e11 d1f3rb2 d1lk3l1 d1sm3h1 d1q0xh1  
d1ghfh1 d7fabl1 d1igch1 d1lo0h1 d4idla\_ d5c2bl\_ d1jrh11 d1l1la1  
d3zhda1 d4kfcz\_ d1b0wa\_ d1e6oh1 d1mexl1 d4krpb\_ d1fnsh1 d1ncwh1  
d4hgma\_ d4eigb1 d4rzca\_ d2mpa11 d4y5xa\_ d5en2b1 d3lrga1 d4ej1c1  
d1rhha1 d1j05b\_ d1forh1 d1q9wb1 d2wzpd\_ d2aq2a1 d1h0da1 d3revb1  
d2ij0c1 d1tzha1 d4m7j11 d1k6q11 d3b9kc1 d1igml\_ d3qeua1 d1dsfl\_  
d1celh1 d1kcu11 d1zvha1 d1zvoa1 d1tqbb1 d1ay111 d2qsc11 d2cgrh1  
d1n10h1 d1ken11 d3eo0a1 d4n9ob1 d1n0x11 d3k1kc\_ d1c4qa\_ d2wv6d\_  
d1prtf\_ d1l1trd\_ d4l63b1 d1r4pb\_ d1prtd\_ d1t10f\_ d2bosa\_ d1prtb1  
d3chbd\_ d2aq2b1 d1enfa1 d1i4pa1 d1v1oa1 d1et9a1 d1esfa1 d2g9hd1  
d4ohja1 d1klud1 d1bxta1 d1eu3a1 d1ty0a1 d1fnua1 d2cqva1 d1fhga\_  
d2k1ma\_ d2d12a1 d1biha3 d1biha1 d1biha4 d3qp3a1 d1g1ca\_ d1gxea\_  
d1cvsc2 d1cvsc1 d1xmwa2 d1m4ka2 d2otpa2 d1biha2 d1rhfa2 d2fcba2  
d2fcba1 d1gsma2 d1epfa1 d1epfa2 d2dava1 d1waaa\_ d1f97a2 d1x44a1  
d1vcaa2 d1fnla2 d1fnla1 d3b5ha2 d3h8na2 d3h8na1 d1bjba1 d1bjba2  
d1pd6a\_ d1f2qa2 d1f2qa1 d3cx2a\_ d1nbqa2 d3b5ha1 d1n26a1 d1xiwb\_  
d1xaua\_ d1fltx\_ d2ifga1 d1olla1 d1olla2 d1cs6a4 d1cs6a3 d1cs6a2  
d1cs6a1 d2gw5a2 d1sy6a1 d1xiwa\_ d1lucta2 d1lucta1 d1ry7b2 d1gl4b\_  
d1qz1a3 d1olza1 d2c9aa1 d1wwca\_

**Family-98 (g.3.7.2)**

**Positive dataset contains 11 protein sequences.**

d2k4ua\_ d2lu9a\_ d1baha\_ d2meoa1 d1wm7a\_ d1wpda\_ d1pvza\_ d1wt7a\_  
d1wz5a\_ d2ktca1 d1wmta\_

**Negative dataset contains 4034 protein sequences.**

d1m32a\_ d1libja\_ d1c7na\_ d1iuga\_ d4q75a\_ d2bkwa1 d1t3ia\_ d1n8pa\_  
d1qz9a\_ d1jff9a\_ d1eg5a\_ d3kgwa\_ d1cl1a\_ d2ctza1 d1vjoa\_ d2rfva\_  
d1gc0a\_ d1cs1a\_ d1d2fa\_ d2ch1a1 d1qgna\_ d1pffa\_ d1elua\_ d1tq5a1  
d1u08a\_ d1lc5a\_ d1b5pa\_ d2ay1a\_ d3pd6a\_ d7aata\_ d2csta\_ d1j32a\_  
d1fg7a\_ d4wlha\_ d1o4sa\_ d1v2da\_ d1gdea\_ d1m6sa\_ d1v72a1 d1svva\_  
d1ajsa\_ d1wsta1 d2f8ja2 d1lk9a\_ d1vp4a1 d1xi9a1 d2gb3a1 d1yaaa\_  
d3i2ka1 d1lnsa3 d1mpxa2 d2cfba1 d1dfoa\_ d1o69a\_ d1bj4a\_ d3k28a\_  
d2bwpa\_ d3lg0a\_ d2fnua\_ d3ou5a\_ d1z7da1 d1b9ha\_ d4msoa\_ d1bs0a\_  
d1s0aa\_ d1sffa\_ d3tqxa\_ d1mdoa\_ d3qboa\_ d3pgya\_ d1bjna\_ d2dkja\_  
d1ejia\_ d1vefa1 d4wxga\_ d3bs8a\_ d3gbxa1 d1w23a\_ d2tbvc\_ d1c8nc\_  
d1x36a\_ d1smvc\_ d1ng0c\_ d4sbvc\_ d1lopa\_ d1f2nc\_ d3lgia\_ d3i77a\_  
d2z9ia2 d4nsva\_ d1lcya2 d4jcna\_ d1os8a\_ d1hpga\_ d1p3ca\_ d1l1ja\_  
d1qtfa\_ d1ddla\_ d1e57b\_ d1dzka\_ d4tlja\_ d2a2ua\_ d4wfvva\_ d3t1da\_  
d4iaxa\_ d3zq3a\_ d2nnda\_ d1i4ua\_ d1bbpa\_ d1kt7a\_ d1lexsa\_ d3s26a1  
d1lf7a\_ d1qfta\_ d4gh7a\_ d1z24a1 d1qabe\_ d1xkia\_ d1ew3a\_ d3bx7a\_  
d4iawa1 d1n0sa\_ d1gkab\_ d3kzaa\_ d2k23a\_ d2l9ca1 d2joza1 d1gm6a\_  
d3kffa\_ d3saoa1 d1e5pa\_ d1yupa1 d1iiua\_ d2wo3b\_ d1shxa\_ d1f56a\_  
d1bypa\_ d1azca\_ d1ws8a\_ d3u25a\_ d1cuoa\_ d1id2a\_ d1rkra\_ d2iaac\_  
d4dp1x\_ d1nwpa\_ d2gima\_ d2i7sa\_ d1qhqa\_ d1gyca3 d1hfua2 d1kbva1  
d1kbva2 d1sdda1 d1sdda2 d1gyca1 d1gyca2 d1mzya1 d2bw4a1 d1aoza1

d1aoza3 d1aoza2 d1kyaa2 d1kyaa3 d1kyaa1 d1mzya2 d4e9sa1 d1sddb1  
d1sddb2 d1hfua1 d1hfua3 d1oela2 d1oela1 d1v10a2 d1v10a3 d1v10a1  
g1gk9.1 g1cp9.1 g1e3a.1 d3sxwa1 d1j3qa\_ d4luka\_ d1a3qa1 d1iknc\_  
d3brda1 d1p7hl1 d1oy3c\_ d1imhc1 d1gjia1 d1zk9a1 d2cxka1 d2bema\_  
d1pama1 d1ea9c1 d1qhoa1 d2fhfa2 d2fhfa1 d1k3ia1 d1j0ha1 d1cxa1  
d2bhua1 d1edqa1 d1f1sa2 d1ut9a2 d1gvia1 d1txka1 d1adqa1 d1fnga1  
d1uvqb1 d1zs8a1 d2vola1 d2vola2 d1mfb12 d2jelh2 d1uwel2 d3qq4b1  
d1kjob\_ d1k5na1 d1osph2 d4odhl2 d1low0a1 d1low0a2 d1bfob2 d3l9ra2  
d3jtth1 d2fath2 d4elkb2 d1fn4b2 d2xfxb\_ d1pg7x2 d1cqka\_ d4k71b2  
d1lk2a1 d1eapb2 d4lfhg2 d1i4fa1 d2nw2a2 d1kfah2 d1mhca1 d1h3ua1  
d1wejh2 d1h0db2 d1a5fh2 d1kcvh2 d1mjuh2 d1qqda1 d1kcrh2 d1k8ia1  
d3huja2 d2nnab1 d1nfd2 d3mffb2 d1s9va1 d1lk3h2 d1q0x12 d1fv1b1  
d1neza1 d4rfeb2 d1r3ha1 d1a6tb2 d1kjva1 d1pz5b2 d1onqa1 d2bc4a2  
d1de4a1 d1k8da1 d1tcra2 d1dn0b2 d1nfd2 d2xwtb2 d1bfoa2 d1mexh2  
d1iakb1 d1ypzf2 d4f7ea2 d1q72l2 d2fbjh2 d1fe8h2 d1clzh2 d1fngb1  
d1uvqa1 d1vgka1 d1c16a1 d4j12a2 d4x99b2 d1igtb3 d1je6a1 d1q72h2  
d1nldh2 d1teth2 d2hmic2 d1ilca2 d1ilca1 d1k8ib1 d1q0yh2 d1kfa12  
d3frua1 d1pg7w2 d1u58a1 d1igyb4 d1igyb3 d1hyrc1 d1klub1 d1deeb2  
d1c12b2 d2bc4b2 d2ig2h2 d1kcv12 d3wn5b1 d1lk2b\_ d1lk3l2 d1mjul2  
d1sm3h2 d1q0xh2 d1zvsal d1ydpal d1u8ib2 d1ypze2 d1kcuh2 d1zx5a1  
d1qwra\_ d1jgta2 d1ofda3 d1ecfa2 d1q15a2 d1ct9a2 d1ao0a2 d1te5a\_  
d1ep0a\_ d2pa7a1 d1wlta1 d2c0za1 d1nepa\_ d1fstb\_ d1ju8a\_ d4alac\_  
d1pjwa\_ d1rera1 d1s6na\_ d3uzqb\_ d4mh8a\_ d1mu2a2 d4i7ga1 d2b5ea2  
d2b5ea3 d2b5ea1 d2b5ea4 d2kp1a1 d2kp2a1 d1hyua3 d1hyua4 d1j08a1  
d1cg2a1 d1yloa2 d1y7ea2 d1y0ya3 d1l1fwa1 d1vixa1 d1fnoa4 d1vhoa2  
d1ysja1 d1vhea2 d1z21a1 d2fvga2 d1vgya1 d2grea2 d1xmba1 g1q71.1  
d1rtqa\_ d1ebfa2 d1r0ka3 d1j5pa3 d1vkoa2 d1vm6a2 d3qvsa2 d1gr0a2  
d3gpdg2 d2q49a2 d1hdgo2 d2g17a2 d2cvoa2 d2czca1 d3pwka2 d1obfo2  
d1i32a2 d1zyao2 d2pkqo2 d1b7go2 d2hjsa2 d1cf2o2 d1vkna2 d1nvmb2  
d1ux8a\_ d1dlya\_ d4i0va\_ d2bkma\_ d1dlwa\_ d2bmma\_ d2msya\_ d2djoa1  
d2r5za\_ d1f43a\_ d2lmda1 d1akhb\_ d1s7ea1 d3nara\_ d1zq3p1 d2craa1  
d1mija\_ d4uuta\_ d3a01a\_ d1x58a1 d3rkqa1 d3cmya1 d2cqxa1 d2da6a1  
d1e3oc1 d1fjla\_ d1mh3a1 d1ig7a\_ d1x41a1 d1wh7a1 d1gt0c1 d2mw8a\_  
d1lfup\_ d1x2ma1 d1b72a\_ d1wi3a1 d1jgga\_ d1wjha1 d1x2na1 d1mnmc\_  
d2cuea1 d3k2aa\_ d2hosa\_ d2jwta2 d1pufa\_ d1oactc1 d2hi3a\_ d1b8ia\_  
d4j19a\_ d3lnqa\_ d1wh5a1 d1b8ib\_ d6paxa1 d1k78a1 d1k78a2 d1xg1a1  
d1litya\_ d1igna2 d2iu5a1 d1zk8a1 d2g7sa1 d2fd5a1 d2np5a1 d1z0xa1  
d2id6a1 d2d6ya1 d2i10a1 d1vi0a1 d2oi8a1 d3c07a1 d2ns7a1 d2fq4a1  
d2yvea1 d1t33a1 d2o7ta1 d1rkta1 d2np3b1 d2g7ga1 d2gena1 d2fbqa1  
d2g7la1 d2gfna1 d2g3ba1 d2jj7a1 d2hyja1 d1sgma1 d1ui5a1 d2hkua1  
d2id3a1 d4jyka1 d1b10a1 d1b10a2 d1d5ya2 d3lv8a\_ d1s3ga1 d1zaka1  
d1s4qa\_ d3tvta2 d1uf9a\_ d1khta\_ d1ckea\_ d1osna\_ d1p5zb\_ d4tmka\_  
d3cm0a\_ d1tmka\_ d1jaga\_ d3h86a\_ d1t0hb\_ d1nn5a\_ d2h92a\_ d3kb2a1  
d2c95a1 d1yj5a2 d1kgda\_ d1ly1a\_ d2ak3a1 d1vyva2 d1deka\_ d2grja1

d1p3ja1 d1y63a\_ d1e4ya1 d1s96a\_ d3iija1 d1lvga\_ d1nksa\_ d1vyua2  
d4e22a\_ d1qf9a\_ d1jjva\_ d1q3ta\_ d1ki9a\_ d1lw7a2 d1teva\_ d1kjwa2  
d1gsia\_ d2iyva2 d1kaga\_ d1viaa\_ d1e6ca\_ d1g3ma\_ d1j99a\_ d1t8ta1  
d1nsta\_ d1zrha\_ d1ls6a\_ d2a3ra\_ d1aqua\_ d2zptx\_ d3ckla\_ d1teta\_  
d1q44a\_ d2gwaha\_ d1odfa\_ d1uj2a\_ d4gi7a\_ d2jeoa1 d1rz3a\_ d1z0ja1  
d3umra2 d3gj0a1 d2gaoa1 d1yzga1 d1x3sa1 d1g7sa4 d1puja\_ d1udxa2  
d1kk1a3 d2o52a\_ d1jwyb\_ d1zcaa2 d1zcba2 d2fv8a1 d2cjwa\_ d3dz8a1  
d1xzpa2 d1vg8a\_ d4qxaa\_ d2ew1a1 d1x1ra1 d2bcgy\_ d3doea1 d3cona\_  
d3rega\_ d3wyga\_ d1upta\_ d2b6ha1 d1zd9a1 d1lnza2 d1r5ba3 d1n0ua2  
d1r2qa\_ d2f91a1 d2rhda\_ d3q3jb\_ d3q85a\_ d1efma1 d1r8qa\_ d2gf9a1  
d2akab1 d1ek0a\_ d1z08a1 d2gcoa1 d2dy1a2 d4g01b\_ d2cxa1 d1svia\_  
d3q72a\_ d1ni3a1 d4ac9a4 d2erxa1 d2bmea\_ d1wxqa1 d2gf0a1 d4ldja1  
d1zunb3 d1d5ca\_ d4lv5b\_ d1efca3 d1kmqa\_ d2g6ba1 d3lrpa\_ d1tada2  
d2y8ea\_ d4rd4a1 d1z06a1 d2heia\_ d3a58b\_ d1u01a2 d1d2ea3 d1zj6a1  
d2ocba\_ d3rwoa\_ d1mr3f\_ d2e9sa1 d4u5xa1 d2iwra\_ d2fn4a1 d3bwdd\_  
d2nzja1 d2atva1 d2ksqa\_ d3l43a\_ d1mkya2 d1mkya1 d1wmsa\_ d1jnja3  
d2rmka\_ d1f6ba\_ d1f60a3 d1gota2 d1jala1 d2fh5b1 d1g16a\_ d2wblc\_  
d1m7ba\_ d1wf3a1 d1f5na2 d1t9ha2 d1z6xa1 d1z0aa1 d2fg5a1 d2a5ja1  
d2bcjq2 d1s0ua3 d1ky3a\_ d4y0va\_ d4lhwa\_ d2qmea1 d2atxa1 d1legaa1  
d1ryha\_ d1moza\_ d1nrjb\_ d2erya1 d3bfka\_ d1puia\_ d1fzqa\_ d3j3az1  
d3t5ga\_ d1shza2 d3defa\_ d2f7sa1 d3raba\_ d3tsoa\_ d3aq4a\_ d2a17a1  
d3sfva1 d3bc1a\_ d2ncda\_ d1sdma\_ d3h4sa1 d2heha\_ d2grya\_ g3kin.1  
d1kk8a2 d1br2a2 d1goja\_ d1f9va\_ d2mysa2 d1lkxa\_ d3t0qa\_ d4db1a1  
d3gbja\_ d1ry6a\_ d1v8ka\_ d1y4wa1 d1g99a2 d2e1za2 d2e1za1 d1saza1  
d1saza2 d1liqca2 d1liqca1 d1eb7a2 d1eb7a1 d1nmla2 d1nira1 d1qksa1  
d1zc6a1 d1zbsa1 d1zbsa2 d1zc6a2 d2ch5a2 d2ch5a1 d1zxo2 d1zxo1  
d1hroa\_ d4gedb\_ d3zooa\_ d1mz4a\_ d1gu2a\_ d1f1fa\_ d1dvva\_ d1c6ra\_  
d1c75a\_ d1e29a\_ d1gdva\_ d1cnoa\_ d1h32b\_ d1co6a\_ d2bh4x\_ d2aiua\_  
d5cytr\_ d1jdl1a\_ d1i8oa\_ d2zboa\_ d3dmia\_ d1ls9a\_ d1wvec\_ d2yk3a\_  
d3ph2b\_ d1dw0a\_ d5aura\_ d1q13a\_ d1qn2a\_ d1f1ca\_ d4zzva\_ d2xspa\_  
d4v20a\_ d1ojja\_ d4ipma1 d1gpia\_ d4csia\_ d3pfza\_ d3ovwa\_ d2yoka\_  
d1fwa1 d1libya\_ d1evsa\_ d1cnt1\_ d1pvhb\_ d1z7ca\_ d1huwa\_ d1bgea\_  
d1rhga\_ d1f6fa\_ d1f45b\_ d1l1rb\_ d1axia\_ d1etea\_ d3tgxb\_ d1scfa\_  
d2z3qa1 d3qb1a\_ d1hula\_ d1m48a\_ d4nkqb\_ d1eera\_ d1v7mv\_ d5e4ea\_  
d2o27a\_ d3b5ka\_ d2psma1 d4zf7a\_ d3uf5a\_ d4x51a\_ d1d9ca\_ d4ypgc1  
d3oq3a\_ d1lqsl\_ d1n1fa\_ d1lau1a\_ d1wu3i\_ d3bes1\_ d3ux9a\_ d3rbaa\_  
d2qtra\_ d1nupa\_ d3l92a\_ d1f9aa\_ d2h29a\_ d1vlha\_ d1lod6a\_ d1lw7a1  
d1mrza2 d4ruka\_ d2e17a\_ d1liq0a2 d1irxa2 d1r6ta2 d1liva4 d2cyba\_  
d1rqga2 d1j09a2 d2yxna\_ d1f7ua2 d1h3fa1 d1ffya3 d2g36a1 d1jila\_  
d1n3la\_ d1i6la\_ d1pfva2 d1h3na3 d3n9ia\_ d3sz3a1 d3sw2a\_ d1moxc\_  
d1dx5i3 d1edmb\_ d1aut12 d1aut11 d1nqlb\_ d1dva11 d1szba2 d1kigl\_  
d2y5fl\_ d1ijqa2 d1gk5a\_ d1g1sa2 d1nt0a3 d1xdtr\_ d1lmja2 d1lmja1  
d1nzia2 d2wphe\_ d1klil\_ d1pfx12 d1pfx11 d1p9ja\_ d1glta2 d1f7ea\_  
d4yzub\_ d2mgpa1 d1b9wa1 d1b9wa2 d2mgpa2 d1ob1c2 d1n1ia2 d1n1ia1

d2npra2 d2npra1 d1qx2a\_ d1ig5a\_ d2y5ia\_ d1qlsa\_ d1psra\_ d3n22a\_  
d2egda\_ d4ggfc\_ d2wcea\_ d2luca\_ d4aqia\_ d3nsia\_ d2lp3a\_ d1j55a\_  
d1a4pa\_ d1k8ua\_ d1nsha\_ d1pvaa\_ d3fs7a\_ d2pvba\_ d1ttxa\_ d1rwy\_  
d2kyfa\_ d1rk9a\_ d1a75a\_ d1exra\_ d1tiza1 d1nyaa\_ d1g8ia\_ d1ggwa\_  
d1wdcc\_ d3fwba\_ d1ggza\_ d2o5ga\_ d1ctaa\_ d1m45a\_ d3i5gc\_ d1sl8a\_  
d1fpwa\_ d2scpa\_ d2roaa\_ d4aqra\_ d3pn7b\_ d1br1b\_ d2mysb\_ d1s6ca\_  
d1bjfa\_ d2obha\_ d1jfk\_ d1jff0a\_ d1qv0a\_ d1lkja\_ d2mlfc\_ d2m97a\_  
d2d8na\_ d4by5a\_ d1jbaa\_ d4nqga\_ d1wdcb\_ d2mysc\_ d1j7qa\_ d1s6ia\_  
d1uhka2 d1r2ua\_ d1dtla\_ d3kf9a\_ d3pn7c\_ d1fi6a\_ d1c07a\_ d1wkya2  
d1uuqa\_ d3wh9a\_ d4m1ra\_ d1xyza\_ d4xuya\_ d2je8a5 d4bf7a1 d3cuia\_  
d1ur4a\_ d1qw9a2 d1odza\_ d2vzsa5 d1bqca\_ d2x2ya1 d1hjqa\_ d1qnra\_  
d4y7ea1 d1vjza\_ d4k68a\_ d2v3ga\_ d4hpga\_ d1nofa2 d1nq6a\_ d1h4pa\_  
d1aq0a\_ d3ziza\_ d4bs0a\_ d1ecea\_ d1h1na\_ d1ta3b\_ d1w91a2 d1l1wa\_  
d1uhva2 d1egza\_ d7a3ha\_ d1tvna1 d3nyda1 d1ghsa\_ d2cyga1 d4xv0a\_  
d2c8na2 d1w32a\_ d3emca\_ d1v6ya1 d1foba\_ d2uwfa1 d2fgla\_ d3niya1  
d2c0ha1 d1rh9a1 d1yq2a5 d1szna2 d1fa2a\_ d1pama4 d5do8a1 d1ea9c3  
d1hx0a2 d2fhfa5 d1qhoa4 d1avaa2 d1m53a2 d4m8ua1 d2gjpa2 d1lwha2  
d4howa1 d1ktba2 d1j0ha3 d3vm5a1 d2x1ia\_ d1wzaa2 d1uasa2 d2diea1  
d1mxga2 d1ht6a2 d1eswa\_ d1liv8a2 d5cpsa\_ d1ud2a2 d1zjaa1 d3gbea1  
d1kwga2 d1wdpa\_ d1gcya2 d1g5aa2 d1hvxa2 d3dhp2a2 d2bhua3 d4do4a1  
d3qgva1 d1e43a2 d1g94a2 d2d3na2 d1gjwa2 d1gvia3 d1x1na1 d1r7aa2  
d1tz7a1 g1apy.1 d3ljqa\_ g1k2x.1 d4c7ga2 d2gjxa1 d1jaka1 d1yhta1  
d4toqa\_ d1wb0a1 d1w9pa1 d1eoka\_ d1litxa1 d1kfw1a1 d1goia2 d1ledqa2  
d2gsja\_ d1hjxa1 d1jnda1 d1vf8a1 d3wdpp1 d3wq5a\_ d1gnxa\_ d4gxpa\_  
d4hz8a\_ d1e4mm\_ d3aiua\_ d1wcga1 d1qvba\_ d3ahxa\_ d1v02a\_ d2dga\_  
d1pbg\_ d1vffa1 d1qoxa\_ d4ha4a\_ d2w0pa\_ d2diaa1 d2e9ia2 d2e9ja1  
d2dj4a1 d2eeba1 d2diba1 d2dmba1 d2dmca1 d2d7oa1 d2ee6a1 d2d7pa1  
d2eeaa1 d2di8a1 d1wlha1 d2d7na1 d2nqca\_ d2d7ma1 d2dica1 d3cnka\_  
d2k3ta1 d2eeca1 d1qfha1 d1qfha2 d2bp3a1 d1v05a\_ d2ee9a1 d2eeda1  
d2di9a1 d1g4ma2 d1id1a\_ d2hmta\_ d1b9ra\_ d1offa\_ d1frra\_ d3wcqa\_  
d1e9ma\_ d1l15pa\_ d1wria\_ d1i7ha\_ d3av8a\_ d1czpa\_ d1rfka\_ d3plma1  
d3b2ga\_ d2bt6a2 d3nvva1 d1krha3 d2h88b1 d1n62a2 d1t3qa2 d1zoyb1  
d1jq4a\_ d1ffva2 d1dgja2 d1rm6c2 d1h6ta1 d9ldta1 d2ewda3 d1up7a1  
d2dfda1 d1s6ya1 d1vjta1 d7mdha1 d1hyea1 d1t2da1 d1ojsa3 d1b8pa1  
d1ldna1 d1hyha1 d1civa1 d2a92a1 d1ez4a1 d1i0za1 d1y6ja1 d1gv0a1  
d1ur5a1 d1l1lda1 d1lobba1 d1v8ba1 d1gdha1 d2dlda1 d1mx3a1 d1ygya1  
d1qp8a1 d1li4a1 d1j4aa1 d2naca1 d1npya1 d3t4ea2 d1a4ia1 d1o0sa1  
d2hk9a2 d2egga2 d1b26a1 d1bvua1 d1gq2a1 d1c1da1 d1leha1 d1gtma1  
d1euza1 d1nvt1a1 d3dona2 d1gpja2 d1vi2a1 d1p77a1 d1nyta1 d1b0aa1  
d1vl6a1 d1v9la1 d1txga2 d3f47a1 d1mv8a2 d2pv7a2 d1xc2a3 d2ahra2  
d4xiya1 d2f1ka2 d1pgja2 d1i36a2 d1np3a2 d1lj8a4 d1teaa3 d1qmga2  
d2i76a2 d2g5ca2 d1wdka3 d1dlja2 d3cuma3 d1kola2 d1f8fa2 d1qora2  
d1jqba2 d1vj0a2 d1cdoa2 d1gu7a2 d1d1ta2 d1xa0a2 d2dm6a2 d1jvba2  
d1rjwa2 d1h2ba2 d1tt7a2 d1piwa2 d1o89a2 d1iz0a2 d1e3ja2 d1yb5a2

d1uufa2 d1vj1a2 d1e3ia2 d3gpdg1 d1vc2a1 d2nvwa1 d1u8fo1 d1ydwa1  
d1hdgo1 d2g17a1 d1cf2o1 d2czca2 d1r0ka2 d1obfo1 d2cvoa1 d1ebfa1  
d1h6da1 d1i32a1 d1zh8a1 d2q49a1 d1qkia1 d1j5pa4 d3pzra1 d1xeaa1  
d1vkoa1 d1vm6a3 d3qvsa1 d2pkqo1 d1b7go1 d1gr0a1 d1p1ja1 d1lc0a1  
d1j0xo1 d3pwka1 d2hjsa1 d1zyao1 d1vkna1 d1t1ta1 d1nvmb1 d3sjua\_  
d3ojfa1 d1xu9a1 d2jjya1 d1n7ha\_ d1y1pa1 d1h5qa\_ d1jtva\_ d4fs3a\_  
d2bkaa1 d1gy8a\_ d2c5aa1 d1ulsa\_ d1ooea\_ d2b69a1 d1y5ma1 d1spxa\_  
d1aela\_ d1bxka\_ d1ydea1 d1gega\_ d1hdoa\_ d1o5ia\_ d1e6ua\_ d1snya1  
d2rhca\_ d3zv4a\_ d5ceja\_ d2d1ya1 d1fjha\_ d3w8ea\_ d2fmua1 d1x1ta\_  
d1rpna\_ d3ay7a1 d1k2wa\_ d1eq2a\_ d2hrba1 d3ruaa\_ d2ew8a1 d4hwka\_  
d1xgka\_ d2bd0a1 d1yo6a1 d2a35a1 d2ntva\_ d1vl8a\_ d1hdca\_ d4bkua\_  
d2ag5a1 d2q45a\_ d1nffa\_ d4iy1a\_ d1zbqa1 d1kewa\_ d1ek6a\_ d1ja9a\_  
d2q46a2 d1iy8a\_ d1cyda\_ d2ptga\_ d1hxha\_ d1uzma1 d3lyla\_ d4m89a\_  
d3wyea\_ d2b11a1 d1w6ua\_ d1sb8a\_ d2q2va\_ d4nr0a\_ d1e6wa\_ d2gasa\_  
d3oiga1 d2bgka1 d1mxha\_ d1vl0a1 d1rkxa\_ d1r6da\_ d1wmaa1 d1e7wa\_  
d2c07a1 d1xkqa\_ d3tzha\_ d1g0oa\_ d3lz6a\_ d1qyca\_ d1ledoa\_ d1oc2a\_  
d1t2aa\_ d1zema1 d2xoxa\_ d1z45a2 d1geea\_ d1p33a\_ d3lt0a\_ d4e6pa\_  
d2wyua\_ d1db3a\_ d4q9na\_ d1xhla\_ d4o1ma\_ d1fmca\_ d2uvda\_ d2gdza1  
d1uaya\_ d2z1ma\_ d2o23a2 d2fr1a2 d2fr1a1 d1qsga\_ d1qyda\_ d4zjua\_  
d2a4ka1 d1yb1a\_ d1wvga1 d1yxma1 d3f4ba\_ d1mg5a\_ d1xg5a1 d1r55a1  
d3gboa\_ d1atla\_ d1buda\_ d4q11a\_ d1quaa\_ d1ypla\_ d1wnia\_ d2gfoa1  
d1vjva\_ d2ayna1 d3nhea\_ d3nqyb\_ d4gera\_ d1bqba\_ d3ulra1 d1g9ka2  
d1kapp2 d1t3ca\_ d1epwa3 d2a97a\_ d3fiea\_ d3ioqa\_ d1fh0a\_ d1o0ea\_  
d1khqa\_ d1m6da\_ d2cb5a\_ d1cs8a\_ g8pch.1 d1s4va\_ d2pnsa\_ d1vsna1  
d1mira\_ d1iwda\_ d2oula\_ d7pcka\_ d3bwka\_ d3bcna\_ d2p86a\_ d1pvja\_  
d1pcia\_ d1gece\_ d1deua\_ d4bs6a\_ d1xkga1 d1cqda\_ d1jqpa2 d2c0ya\_  
d2bdza\_ d3p5ua\_ d2o36a\_ d1k9xa\_ d2jk6a2 d2jk6a1 d1fecal d1fecal2  
d1lpfa1 d1lpfa2 d1xhca1 d1xhca2 d1dxla2 d1dxla1 d1m6ia2 d1onfa1  
d1onfa2 d3lada2 d3lada1 d1w4xa1 d1w4xa2 d1gesa2 d1mo9a1 d1xdia1  
d1fl2a2 d1fl2a1 d1fcda1 d1fcda2 d1h6va2 d1h6va1 d1mo9a2 d1gv4a2  
d1gv4a1 d2gv8a2 d2gv8a1 d1aoga1 d1aoga2 d1hyua1 d1ebda1 d1ebda2  
d3dk9a1 d1q1ra2 d1q1ra1 d1gesa1 d1zbfal d2z1ha\_ d2etja1 d3qioa1  
d1j11a\_ d2e41a\_ d1j12a\_ d2lsna1 d1lio2a\_ d1uaxa\_ d2yv0x\_ d1mu2a1  
d1ekea\_ d1pn0a1 d1reoal d1ju2a1 d2f5va1 d3c96a1 d2gmha1 d1pj5a2  
d1gpea1 d1o5wa1 d1n4wa1 d1k0ia1 d2dw4a2 d2ivda1 d2voua1 d1kdga1  
d1s5ja1 d2hbja2 d2igia\_ d1wlja\_ d1qhta1 d4dleal d1tgoa1 d2f96a1  
d3tr8a1 d3mxma\_ d1q8ia1 d1y97a1 d1w0ha\_ d1kfsa1 d2py5a1 d1noya\_  
d1d5aa1 d1yt3a3 d2guia\_ d3mwpal d4kb1a\_ d1wgqa1 d1v89a1 d2codal  
d1zc3b\_ d1wg7a1 d1u5ea1 d1v61a1 d2cocal d2ys1a1 d1v5pa1 d1ntya2  
d1wjma1 d1wi1a1 d1u29a\_ d1xx0a1 d1unqa\_ d2zkmx3 d1fhoa\_ d1v88a1  
d2adza1 d1x1fa1 d1p6sa\_ d2coaa1 d1btka\_ d1v5ma1 d1faoa\_ d2x18a\_  
d1dyna\_ d1x1ga1 d4kaxb\_ d2j59m1 d1ki1b2 d1xcga2 d1txda2 d1u5da1  
d1dbha2 d1w1ha\_ d1upqa\_ d1v5ua1 d1foea2 d2fjla1 d1eaza\_ d2dfka2  
d2cofa1 d1kz7a2 d1k8ka2 d1k8ka1 d3uleb1 d3i33a2 d3i33a1 d1bupa1

d1dkgd2 d1dkgd1 d4ci6a2 d1jcfal d4a2ba2 d2fxua1 dlyaga2 dlyaga1  
d4cbua2 d1r7ha\_ d1faaa\_ d1wika1 d1xfla\_ d1ttza1 d2f51a1 d1ti3a\_  
d1nhoa\_ d1sena\_ d2i4aa\_ d1ep7a\_ d1zmaa1 d1fo5a\_ d3lefa1 d3diea1  
d2yana1 d1z6na1 d1oaza\_ d3zywa1 d4aj8a\_ d1nm3a1 d4fiwa\_ d1wmja\_  
d4hs1a1 d1liloa\_ d1xwaa1 d1wjka1 d2vm1a\_ d1fb6a\_ d1gh2a\_ d1h75a\_  
d1nw2a\_ d1kx5b\_ d3a6na\_ d4m6ba2 d2nqbd\_ d3wkjd\_ d2yfwe\_ d4h9na\_  
d5bnxa\_ d1kx5c\_ d3r45a\_ d1eqzb\_ d4jjnb\_ d1f66c\_ d1eqza\_ d4wnnb\_  
d1kx5a\_ d1u35c1 d1id3a\_ d2nqbc\_ d1kx5d\_ d3us3a3 d3us3a1 d1tafa\_  
d1bh9b\_ d1tafb\_ d1jfib\_ d1q9ca\_ d1h3ob\_ d2byka1 d1n1ja\_ d4g92b\_  
d1bh9a\_ d1jfia\_ d1h3oa\_ d2bykb1 d1pd212 d1nhya2 d2a2ra2 d1k0dd2  
d1f2ea2 d1gsua2 d1f3ba2 d2fhea2 d2pvqa1 d1tw9a2 d1oyja2 d1e6ba2  
d1k0ma2 d3ik7a1 d4is0a1 d1r5aa2 d1jlva2 d1m0ua2 d3gtub2 d1z9ha2  
d1okta2 d1axda2 d2gsra2 d1tu7a2 d1k3ya2 d1zgma1 d1b48a2 d1gnwa2  
d1gwca2 d2gsta2 d1glqa2 d1oe8a2 d1v2aa2 d1fw1a2 d1duga2 d3vrda1  
d3vrda2 d1fcdc1 d1h1oa2 d1h1oa1 d1m70a2 d1m70a1 d1ig8a1 d1czan2  
d1czan3 d1czan1 d1ig8a2 d1czan4 d1bg3a4 d1bg3a3 d1bg3a2 d1bg3a1  
d3h1jd1 d1qqya\_ d1gd6a\_ d1f6ra\_ d1ivma\_ d2gv0a\_ d1iiza\_ d2z2fa\_  
d1j8xa\_ d1ghla\_ d1b9oa\_ d1741a\_ d1691a\_ d2o4wa\_ d1p37a\_ d1k28a3  
d1xjta1 d1jtma\_ d2f2qa\_ d4e97a1 d3w3ea\_ d4tx7a\_ d3cq1a\_ d4msta\_  
d3iwra\_ d2z37a\_ d4dyga\_ d2pjsa1 d1k11a\_ d2i7ra1 d1e1ca\_ d1xqaa1  
d5cj3a1 d1jifa\_ d2p7oa\_ d1r9ca\_ d1nkia\_ d1mpya2 d1kw3b2 d1kw3b1  
d4ghga1 d1tfza1 d3isqa1 d3isqa2 d1sqia1 d1sqia2 d1lkda2 d1lkda1  
d1mpya1 d1cjxa1 d1sp9b2 d1t47a1 d1t47a2 d1flua2 d1sp8a1 d1sp8a2  
d1flua1 d1etob\_ d1umqa\_ d1g2ha\_ d1s5ja2 d1qhta2 d4dlea2 d1tgoa2  
d3py8a2 d1q8ia2 d1kfsa2 d2py5a2 d1qsta\_ d2beia1 d4m3sa\_ d1u6ma1  
d1ygha\_ d1yk3a1 d3dr6a\_ d1xmta\_ d1z4ea1 d2ge3a1 d1bo4a\_ d2fiaa1  
d2jdca1 d1y9wa1 d3to7a\_ d1lwza1 d2fl4a1 d2ozua1 d2b5ga\_ d2cy2a1  
d2p0wa\_ d1cm0a\_ d4pswa\_ d1yrea1 d1yr0a1 d1m4ia\_ d2gana1 d1yvka1  
d1ghea\_ d2g3aa1 d1y7ra1 d2euia1 d1q2ya\_ d2fsra1 d1xeba\_ d2ae6a1  
d1qsma\_ d2aj6a1 d1y9ka1 d1i12a\_ d1vkca\_ d2atra1 d1n71a\_ d2d4pa1  
d2fiwa1 d2fe7a1 d1tiqa1 d2ou2a\_ d1yx0a1 d2fcka1 d1p0ha\_ d2j8ma\_  
d2pq8a\_ d1z4ra1 d1s3za1 d1ufha\_ d1c4qa\_ d1prtc1 d2wv6d\_ d1prtf\_  
d1l1trd\_ d4l63b1 d1r4pb\_ d1prtd\_ d1t10f\_ d2bosa\_ d1prtb1 d3chbd\_  
d1xvqa1 d1pn0a2 d3hy2a\_ d2cvba1 d1o8xa\_ d1lu4a\_ d1we0a1 d2bmxal  
d2a4va1 d1psqa\_ d1xiya1 d1q98a\_ d1n8ja\_ d1zofa1 d2ggta\_ d3tjja\_  
d4jela1 d3s9fa\_ d2zcta\_ d1qmva\_ d1jfua\_ d2b1ka\_ d5dvba1 d2b5xa1  
d2v2ga\_ d1st9a\_ d3tb2a\_ d4l1ra\_ d4fh8a1 d1e2ya\_ d1knga\_ d2h30a\_  
d1i5ga\_ d2z9sa\_ d2f8aa1 d1tp9a1 d2b7ka\_ d1nm3a2 d3hvva\_ d2wfca1  
d4kcea\_ d1xvwa1 d4gqca1 d3qpma\_ d4k1fa\_ d1zsoa1 d1gp1a\_ d1prxa\_  
d4od7a1 d1z6ma1 d4mcua1 d4dvca1 d3l9sa\_ d1un2a\_ d3rppa\_ d1zsqal  
d2m5ta\_ d1cqqa\_ d1wqsa\_ d5bpea\_ d2ipha\_ d1lvoa\_ d2bhga1 d3tnta\_  
d3sjia\_ d3d23a1 d2fyqa\_ d3tloa\_ d3zvea1 d3q3ya1 d4asha1 d4aw8a\_  
d1ys1x\_ d4hs9a\_ d1ex9a\_ d1ku0a\_ d3qmma\_ d1mixa2 d1e5wa2 d1isna2  
d2a16b2 d2h1ia1 d2r8ba1 d3b5ea1 d3cn9a\_ d1lgya\_ d4l3wa\_ d1gz7a\_

d1lukca\_ d2hqya1 d2hqya2 d1ne9a1 d1lrza3 d1ne9a2 d3groa\_ d1pjaa\_  
d1thta\_ d1svpa\_ d1mbma\_ d3su6a1 d1cula1 d4agka\_ d1q31a\_ g1n11.1  
d3e90b\_ d1ep5a\_ d3u1jb\_ d3zxha\_ d1cgl\_a\_ d1rm8a\_ d1eaka2 d1hy7a\_  
d2jsda\_ d1cxva\_ d1hv5a\_ d1i76a\_ d3p0ya1 d1lgra1 d1lgra2 d1n8yc2  
d1n8yc1 d1m6ba2 d1m6ba1 d1sr9a2 d1rqba2 d1h6ua2 d1lmra\_ d1cixa\_  
d1y29a\_ d1v7fa\_ d2jtba\_ d1g9pa\_ d1lupa\_ d1qk7a\_ d1mb6a\_ d2a2va\_  
d1niya\_ d1i25a\_ d1hvwa\_ d2mpqa\_ d1ie6a\_ d1kqha\_ d1la4a\_ d2mxoa1  
d1d10a\_ d1koza\_ d1qk6a\_ d1emxa\_ d1lqra\_ d1c6wa\_ d1rmka\_ d1ixta\_  
d1eyoa\_ d1cnna\_ d1fu3a\_ d1g1pa\_ d1f3ka\_ d1rypd\_ d1lrua\_ d1rypc\_  
d3unfk\_ d1rypa\_ d1j2pa\_ d1lru1\_ d1j2qh\_ d3unfh\_ d1m4ya\_ d1rypb\_  
d1lru1\_ d1lru2\_ d1q5rh\_ d1rypg\_ d1g3ka\_ d1lru1\_ d1q5qa\_  
d1e94a\_ d1lru1\_ d1ryph\_ d3ty6a\_ d1lru1\_ d1lru1\_ d1rype\_ d1lru1\_  
d1lru1\_ d3mi01\_ d1rypf\_ d1lru1\_ d2z3ba\_ d3mka2\_ d1lru1\_ d1e88a1  
d1l6ja5 d1l6ja4 d1eaka4 d1eaka3 d1h8pa2 d1h8pa1 d1ny721 d1ny722  
d1a6ca3 d1a6ca2 d1a6ca1 d1pg122 d1pg121 d1pg111 d1ny711 d1mqta\_  
d1d4m3\_ d1fmd3\_ d2mev1\_ g1aym.1 d1ev13\_ d4q4w1\_ d1r1a3\_ d2x5ia\_  
d1rhi1\_ g1r1a.1 g1d4m.1 g1rhi.1 d1b35b\_ d1loopa\_ d1tme1\_ d4iv1a\_  
g1pvc.1 g1fnp.1 d1fnp1\_ d4gb31\_ d1d4m1\_ d1fmd1\_ d1ev11\_ d2wzr3\_  
g1cov.1 d1qqp3\_ g1fmd.1 d2x5ic\_ d1rhi3\_ g1oop.1 d1hxs1\_ g1hxs.1  
d1fnp3\_ d1bev1\_ g2mev.1 d1eah3\_ d1aym1\_ d1pvc3\_ d1qqp1\_ d1zba3\_  
d1h8ta\_ d3vbhc\_ g1b35.1 g1bev.1 g1ev1.1 d1bev3\_ g1tmf.1 d1tmf1\_  
d1b35a\_ d2mev3\_ g1eah.1 g1h8t.1 d1eah1\_ d4q4w3\_ d1r1a1\_ d1aym3\_  
d1pvc1\_ d1zba1\_ d1h8tc\_ d1oopc\_ d1tme3\_ g1qqp.1 d4iv1c\_ g1tme.1  
d1y14b1 d2nn6i1 d1i941\_ d2zjra2 d1smxa\_ d2qamc2 d1hh2p1 d2r7da1  
d1r12a2 d1wfaq1 d3bzka4 d1x6oa2 d3a0ja\_ d2j01d2 d2ja9a1 d4q15a\_  
d1hr0w\_ d1luza\_ d2n3sa\_ d2vnud1 d1h95a\_ d1go3e1 d2nn6h1 d1ne3a\_  
d2mola\_ d1iz6a2 d1e3pa2 d2ix0a3 d2ix0a2 d2lxja\_ d1ueba3 d1ueba2  
d2z0sa1 d1u01a1 d2ix0a1 d2eifa2 d2je6i1 d3i2za1 d2c35b1 d2ahob2  
d1t9ha1 d3i4oa\_ d2qall1 d1jt8a\_ d2nn6g1 d1g6pa\_ d3cama\_ d1i94q\_  
d1c9oa\_ d1d7qa\_ d2ba0a1 d2vnud2 d2vnud3 d1khia2 d2qalq1 d1wi5a1  
d1xtda2 d1ny4a\_ d1eixa\_ d3exra\_ d2ffca1 d2fdsa1 d3n3ma1 d2czda\_  
d1q6oa\_ d2yyua\_ d1vqta1 d3ldva1 d1rw1a\_ d1z3ea1 d3l78a\_ d4lt9a1  
d3tc7a1 d3hoja\_ d1i4na\_ d3vnda\_ d3n18a1 d1geqa\_ d3nav1a1 d4a2ra1  
d3tc6a1 d1ujpa\_ d4ijba\_ d1xcfa\_ d1vc4a\_ d1rd5a\_ d1qopa\_ d3b5va\_  
d2r80b\_ d1cqxa1 d1cg5a\_ d1gcvb\_ d3boma\_ d2h8fb\_ d2raoa\_ d3bj1a\_  
d4hrrb\_ d2r50a\_ d3d1kb\_ d2aa1b1 d3zhwa\_ d3hf4b\_ d3gdja\_ d1jebb\_  
d3bj1b\_ d1x9fb\_ d1wmub\_ d1gcva\_ d3bcqb\_ d3d4xb\_ d1gvha1 d2dc3a\_  
d3hf4a\_ d4yu3a\_ d3k8ba\_ d1qpwb\_ d2r80a\_ d3bcqa\_ d1v4wa\_ d3wtgb\_  
d1j17a\_ d4esaa\_ d1a9we\_ d3d1ab\_ d1fsla\_ d4h21a\_ d1v4wb\_ d1mwca\_  
d1vhba\_ d1jeba\_ d1spgb\_ d1h97a\_ d1q1fa\_ d1tu9a1 d3d1aa\_ d3hyub\_  
d2zfb\_ d3fs4a\_ d1oj6a\_ d1shrb\_ d4h21b\_ d4yu3b\_ d1spga\_ d3hrwa\_  
d3qqra\_ d3at5a\_ d4wchd\_ d3hyua\_ d1cg5b\_ d1uc3a\_ d1hbra\_ d2raob\_  
d1outb\_ d4esab\_ d3gdjb\_ d3qqqa\_ d1x9fc\_ d3vrfa\_ d1litha\_ d3mkba\_  
d3d4xa\_ d3mjpa\_ d1j16a\_ d3fh9a\_ d1outa\_ d2dc3b\_ d1it2a\_ d3eoka\_

d3g46a\_ d1qpwa\_ d3vrfb\_ d1ch4a\_ d1x9fd\_ d1hdsa\_ d2zfa\_ d3mkbb\_  
d1or4a\_ d3wtga\_ d1a4fa\_ d3fh9b\_ d3bomb\_ d3cy5a\_ d3at5b\_ d1x9fa\_  
d2oifa\_ d4lmb\_ d1cpcb\_ d3v57a\_ d1kn1a\_ d1cpca\_ d4f0ta\_ d2vjha\_  
d4po5b\_ d1eyxa\_ d1alla\_ d4f0tb\_ d1b33b\_ d1b8db\_ d4h0mb\_ d1b33a\_  
d2vjhb\_ d4lm6b\_ d2vmlb\_ d1allb\_ d2vjta\_ d3dbja\_ d2vmla\_ d2vjtb\_  
d4f0ub\_ d1f99b\_ d4rmpa1 d1lliaa\_ d1eyxb\_ d2uulb\_ d4lmsb\_ d4f0ua\_  
d2bv8a\_ d1f99a\_ d2bv8b\_ d2c71b\_ d3dbjb\_ d4rmpb1 d1b8da\_ d4h0ma\_  
d3v57b\_ d1kn1b\_ d1liab\_ d2uula\_ d2j96a\_ g1wht.1 d2xqfa\_ d1ea5a\_  
d1f6wa\_ d1qe3a\_ d1k4ya\_ d4qwwa\_ d2ha2a\_ d3c8da2 d2pbla1 d1jkma\_  
d1jjia\_ d1jjfa\_ d1jmx2 d1jmx1 d1pbya2 d1xm5a\_ d1xaxa\_ d1tvia\_  
d4iuua3 d4bvva\_ d5hpga\_ d3k65a\_ d1ki0a3 d1ki0a2 d1ki0a1 d1a0ha1  
d1pmla\_ d3sp8a3 d2feba1 d1gvfa\_ d3qm3a1 d2fjka\_ d1f74a\_ d3l21a\_  
d2e1da\_ d1to3a1 d1w3ia\_ d1sfla\_ d1n7ka\_ d1vcva1 d4imea\_ d1wa3a\_  
d2ocza1 d1f2ja\_ d3m16a\_ d2yxga\_ d1ub3a\_ d3a5fa\_ d1fbaa\_ d1l6wa\_  
d1xfba1 d1wx0a1 d1vpxa1 d1ojxa\_ d1mxsa\_ d2a4aa1 d1xkya1 d3cq0a1  
d3s1xa\_ d1f05a\_ d1fdja\_ d3cpa1 d4d2ja\_ d1g8fa3 d3rp2a\_ glucy.1  
d1fuja\_ d2zchp\_ d3w94a\_ d1si5h\_ d1l06a\_ g2pka.1 d1cgha\_ d1kigh\_  
d1a5ia\_ d3s9ba\_ d1hj8a\_ d1ao5a\_ d2anya\_ d1q3xa1 d1gvza\_ d1azza\_  
d4gsoa\_ d2f91a1 d1iaua\_ d1gdna\_ d1eufa\_ g1fiw.1 d1eq9a\_ d4nfea\_  
d2rdla\_ d1spja\_ d1elva1 d1a7sa\_ d1ekbb\_ d1pfxc\_ d1yc0a\_ d2aiqa\_  
g1fiz.1 d1fi8a\_ d4k60a\_ d4dgja\_ d1mzaa\_ d1op0a\_ d3tjva\_ d1pytd\_  
d1sgfg\_ g1gg6.1 d2eeka\_ g1rtf.1 d1a0ja\_ d3g01a\_ d1pytc\_ d4e7na\_  
d1ddja\_ d1z8ga1 d2hlca\_ d1npma\_ d1brup\_ g1jou.1 d1sgfa\_ d1autc\_  
g2hnt.1 g1kdq.1 d3s69a\_ d4crga\_ d1fxya\_ d1bqya\_ d2ftba\_ d1pmpa\_  
d2rcqa1 d1fdqa\_ d4lkpa\_ d1sa8a\_ d1vyfa\_ d1lpja\_ d3vg7a1 d4azqa1  
d1o8va\_ d5bvqa\_ d1p6pa\_ d2qo4a\_ d1opba\_ d1yiva1 d1olva\_ d4bvma1  
d4tkba\_ d4i3ba\_ d1bwya\_ d1ftpa\_ d1ggl\_a\_ d4gkca\_ d1cbia\_ d3p6da1  
d1kqwa\_ d2a0aa1 d1m4la\_ d2bk7a\_ d3fjua\_ d1z5ra1 d1kwma1 d1uwya2  
d1jqga1 d2c1ca1 d1h81a2 d1e69a\_ d1mv5a\_ d3g60a4 g1ii8.1 d1ewqa2  
d1qhla\_ d1v43a3 d2wmfa1 d1vpla\_ d1g2912 d4a82a2 g1f2t.1 d2d62a1  
d3tuic1 d2bbsa1 d3g60a3 d2ixea\_ d1g6ha\_ d1sgwa1 d2qi9c\_ d3rlfa1  
d3b60a1 d3d31a2 d2pzea1 g1xew.1 d1jj7a\_ d1oxxk2 d2onka1 d1wlwa\_  
d3gqba2 d1skye3 d1xp8a1 d1tf7a2 d1tf7a1 d1ye8a1 d1skyb3 d2qe7d2  
d4blta\_ d4huta\_ d3l1daa2 d4hyya\_ d2i3ba1 d1crla\_ d3j9tb2 d3ntua2  
d1vdza1 d2z43a\_ d1e9ra\_ d1nlfa\_ d3ziaa2 d1n0wa\_ d1g6oa\_ d3ziad2  
d3j9ta2 d1pzna2 d3gqbb2 d2i49a\_ d1nnfa\_ d1xvxa\_ d1ursa\_ d1h3da1  
d1iuda\_ d4m1va1 d1twya\_ d3e13x\_ d2nxoa1 d4pfua\_ d3ttma\_ d1elja\_  
d2qmwa1 d1us5a\_ d1y3na1 d1jeta\_ d1uqwa\_ d4f19a1 d2esna2 d3thia\_  
d3fasa1 d2uyeb\_ d2xwva1 d1r9la\_ d2fyia1 d1pb7a\_ d2ozza1 d1sw5a\_  
d1nh8a1 d1vr5a1 d2g29a\_ d1xs5a\_ d3lswa\_ d2z23a\_ d3w9va\_ d3tcha\_  
d1q35a\_ d1z7me1 d3q27a\_ d1p99a\_ d1ve4a1 d2i6ea1 d4mcoa1 d4n8ya\_  
d1eu8a\_ d1zbma1 d1hsla\_ d1ixca2 d1j1na\_ d1xvya\_ d1y9ua\_ d2z22a1  
d1xoca1 d4oera\_ d1wdna\_ d5f1qa1 d1xt8a1 d4gwoa\_ d4igta1 d1pc3a\_  
d4mmpa1 d1o63a\_ d2czla1 d2onsa2 d4mija1 d1eh3a\_ d3skpa\_ d1dtza1



d1dtza2 d1ieja\_ d1jnfa2 d1ce2a1 d1jnfa1 d1b1xa2 d1b1xa1 d1jw1a1  
d1jw1a2 d1ryoa\_ d1h76a1 d1c4oa1 d2p6ra3 d2p6ra4 dloywa2 dloywa3  
d1wrba1 d1w36b2 d1w36b1 d1c4oa2 d3bora\_ d1t6na\_ d2eyqa5 d2eyqa3  
d2eyqa2 d2zu6a2 d1veca\_ d1uaaa1 d1w36d1 d2g9na1 d1z3ix2 d2rb4a\_  
d1hv8a1 d1hv8a2 d1t5ia\_ d1w36c2 d2j0sa2 d2j0sa1 d1fuka\_ d3hjha1  
d1z5za1 d1qdea\_ d1z63a1 d1s2ma2 d1s2ma1 d1wp9a1 d1wp9a2 d1gm5a4  
d3dina4 d3dina3 d1q0ua\_ d1w36c1 d1z3ix1 d1nkta3 d1nkta4 d1uaaa2  
d1w36d2 g1qhh.1 d2fwra2 d2fwra1 d3q3ma\_ d1za0a1 d1mxra\_ d2inca\_  
d1jk0a\_ d2incb\_ d1mhyb\_ d3hf1b\_ d1r2fa\_ d2uw1a\_ d1mhyd\_ d3n37a\_  
d1afra\_ d1oquc\_ d1syys\_ d1mtyd\_ d2o1za\_ d1uzra\_ d1smsa\_ d2fkza\_  
d1zujal d1s3qa1 d2fjca1 d1z6om1 d1veia\_ d4dyya\_ d1jiga\_ d3gvya\_  
d2pyba\_ d4cy9a1 d3bvfa1 d1r03a\_ d2cf7a\_ d1nf4a\_ d1zs3a1 d4iwka\_  
d3ka8a\_ d3np0x\_ d1n1qa\_ d1lb3a\_ d4e6ka\_ d1z6oa1 d2fzfa1 d4dyua\_  
d3ge4a\_ d1jgca\_ d4am4a\_ d2z6ma\_ d1ji5a\_ d1vlga\_ d1lkoa1 d1krqa\_  
d3qz3a\_ d1o9ra\_ d2ffxj\_ d1euma\_ d1yv1a1 d2v2pa\_ d1j30a\_ d4di0a\_  
d1dpsa\_ d1oewa\_ d2qzxa\_ d2asia\_ d1psoe\_ d1smra\_ d2h6ta\_ d1pfza\_  
d1lizda\_ d3hd8a\_ d1j71a\_ d1dpja\_ d4aa9a\_ d1t6ex\_ g1b5f.1 g1lya.1  
g1htr.1 d1qdma2 d1bxoa\_ d1wkra\_ d1tzsa\_ d1libqa\_ d2qzwa\_ d1bdqa\_  
d3ggta\_ d3ixoa\_ d1mrxa\_ d2haha\_ d1tw7a\_ d4njsa\_ d1sgua\_ d2p3da\_  
d1nsoa\_ d3d3ta\_ d2rkfa\_ d1c6ya\_ d2rspa\_ d3ogpa\_ d3ekwa\_ d2o4na\_  
d2j9ja\_ d1baia\_ d3ggua\_ d3lzua\_ d4npua\_ d4j55a\_ d2r8na\_ d2fxda\_  
d2p3ca\_ d4dqa\_ d3ttpa\_ d3t3ca\_ d2p3aa\_ d2hc0a\_ d2fdda\_ d3mwsa\_  
d3rcha\_ d3k40a\_ d1pmma\_ d1k8rb\_ d1wgra1 d1ef5a\_ d1wfyal d1e8ya3  
d1wgya1 d1lfda\_ d2cs4a1 d1wxma1 d2byeal d3kh0a1 d2byfa1 d1wxaa1  
d1e7ua3 d1h4ra3 d4yl8a1 d2a16a3 d1wgda1 d1wga1 d4q5eb\_ d1wjna1  
d1se9a\_ d3n3kb\_ d1wz0a1 d1we6a1 d2m0xa\_ d2gbka\_ d3rt3b1 d1wh3a1  
d1sifa\_ d2ekek2 d4ii2b1 d4hk2a1 d1c3ta\_ d1m94a\_ d1wgha1 d1ttna1  
d1j8ca\_ d1wx8a1 d3v6cb1 d2ma9b\_ d4i61b1 d1bt0a\_ d2jvca1 d1iyfa\_  
d2k1fa\_ d1wxva1 d1wf9a1 d1t0ya\_ d2io0b2 d1x1ma1 d2gbma\_ d1zw7a1  
d2m17a\_ d1ud7a\_ d1we7a1 d2l1wpa\_ d2gbja\_ d1wjua1 d1v6ea1 d1v86a1  
d4eewa\_ d1w1aa1 d4icva\_ d4gu2a\_ d1wx7a1 d1wy8a1 d4hjka1 d2faza1  
d1v5oa1 d1g66a\_ d1qoza\_ d5ajha1 d4lu0a\_ d1of8a\_ d3unda1 d3e9aa1  
d1vr6a2 d1n8fa\_ d2qkfa\_ d1d9ea\_ d2h0ba\_ d2erfa\_ d1h30a2 d3mw4a1  
d1pz7a\_ d2r1ba\_ d3v64a1 d1d2sa\_ d3bopa1 d3mw3a1 d1okqa1 d1okqa2  
d1dszb\_ d1a6ya\_ d3cbba\_ d1ynwa1 d1r4ia\_ d1hcqa\_ d2hana\_ d2hanb\_  
d2enval d1kb4b\_ d2n11b\_ d1l01a\_ d1cita\_ d1um8a\_ d1ixza\_ d1qvra2  
d1qvra3 d1qzma\_ d1sxjc2 d1jr3d2 d2p65a\_ d1l8qa2 d3hu3a3 d1sxjd2  
d1njfa\_ d1in4a2 d1sxja2 d1tuea1 d2ce7a2 d1w5sa2 d1sxjb2 d1d2na\_  
d1ny5a2 d1ofha\_ d2gnoa2 d2a5yb3 d1fnna2 d1u0ja1 d1lv7a\_ d1iqpa2  
d2fnaa2 d1ixsb2 d4gita\_ d1sxje2 d1g41a\_ d3ia2a\_ d1a88a\_ d4dgqa1  
d1hkha\_ d1zoia\_ d1dy2a\_ d1ixra2 d1iyjb4 d1iyjb5 d1iyjb3 d1o7ia\_  
d4ipca1 d1x3ea\_ d4apva\_ d1jb7a1 d1jb7a2 d1jb7a3 d3kdfa\_ d1ue1b\_  
d1wjja1 d3eiva\_ d1xjva2 d1xjva1 d2ccza2 d1se8a\_ d1l1loc\_ d1jb7b\_  
d1qvca\_ d3ulla\_ d1qzga\_ d1miua4 d1miua5 d1miua3 d3ubub\_ d1legia\_

d1qo3c\_ d1v7pa\_ d1tdqb\_ d3ubua\_ d1c3ab\_ d1h8ua\_ d3bx4b\_ d1t8ca1  
d1sb2a1 d1qdda\_ d2ziba1 d3cada\_ d1byfa\_ d1j34b\_ d1jwia\_ d1jzna\_  
d1c3aa\_ d1oz7b\_ d1wmza\_ d3bdwb\_ d1hq8a\_ d1fifa1 d1dv8a\_ d3hupa\_  
d1wk1a1 d1umra\_ d2afpa\_ d3bx4a\_ d1gz2a\_ d1sl6a\_ d1v7pb\_ d3g8ka\_  
d1ixxa\_ d1j34a\_ d1jwib\_ d1g1sa1 d1y17a1 d1ja3a\_ d1fvub\_ d3bdwa\_  
d1sb2b1 d1fvua\_ d1umrc\_ d1oz7a\_ d4m17a\_ d3cfwa1 d1ypqa1 d1g1ta1  
d3fd4a\_ d3l9jc\_ d4dn8a1 d1v41b\_ d1rd11\_ d2msba\_ d1fvia1 d1ckma1  
d1p16a1 d1x9na2 d1xwdc1 d3kj4a\_ d1w8aa\_ d2ifga3 d1p9ag\_ d1xkua\_  
d1rpma\_ d2shpa1 d1yfoa\_ d1l8ka\_ d2ooqa1 d1g4us2 d1p15a\_ d1lara2  
d1lara1 d1wcha\_ d2fh7a2 d2fh7a1 d1ohea1 d1ohea2 d2f4da\_ d1rxda\_  
d2hxpa\_ d1xria\_ d1fpza\_ d3ezza\_ d4y2ea\_ d1i9sa\_ d3azya\_ d3wvja\_  
d1upsa1 d1ajoa\_ d2hyka\_ d2vy0a\_ d1o4ya\_ d3o5sa\_ d3d6ea\_ d3atga\_  
d1dypa\_ d1umza\_ d3i4ia\_ d1c11a\_ d41bqa\_ d1a78a\_ d1slta\_ d4no4a\_  
d3zsja\_ d3duia\_ d1g86a\_ d1is3a\_ d1qmja\_ g1qmo.1 g1len.1 d3zyra\_  
d1fnya\_ d1n47a\_ g21tn.1 d1avba\_ d3usua\_ d1dhkb\_ d1f9ka\_ d1ukga\_  
d1g8wa\_ d1g9fa\_ d1wbfa\_ d3wcsa\_ d1g7ya\_ g1loe.1 d1mvqa\_ d1hq1a\_  
d1v6ia\_ d1dbna\_ d1qnwa\_ d1fx5a\_ d4l8qa\_ d1ioaa\_ d3n35a\_ d3ubra\_  
d1qo8a1 d1d4ca1 d2k3va\_ d1ft5a\_ d1qdba\_ d1m1qa\_ d2j7aa\_ d1h21a\_  
d1ogyb\_ d4fasa\_ d1jnia\_ d1sp3a\_ d3h33a\_ d1rwja\_ d19hca\_ d1os6a\_  
d3bxua\_ d3h4na\_ d3caoa\_ d1j0pa\_ d2ctha\_ d1duwa\_ d1ofwa\_ d2e84a\_  
d1hh5a\_ d1gyoa\_ d3h34a\_ d1wioa4 d1ccza2 d1vcaa1 d1ic1a1 d2d9qb1  
d2nxyb2 d2dara2 d2dara1 d1wyha2 d2dloa2 d1rutx4 d1rutx3 d2cuqa2  
d1x41a2 d1x41a1 d1x3ha2 d1x3ha1 d2d8za1 d1x61a2 d1x6aa1 d1x6aa2  
d2cora2 d2cora1 d1v6ga1 d1v6ga2 d2d8za2 d1x64a1 d1x64a2 d1b8ta1  
d2co8a1 d1x63a2 d2dj7a2 d2dj7a1 d2cu8a2 d2cu8a1 d1g47a2 d1g47a1  
d1j2oa1 d1wyha1 d2dloa1 d1wiga1 d1wiga2 d2cupa2 d2cupa3 d1x68a1  
d2d8ya2 d2d8ya1 d1m3va2 d1x62a1 d1x68a2 d1x61a1 d1b8ta3 d1b8ta2  
d2d8xa2 d2d8xa1 d1x4ka1 d1x4ka2 d2cuqa1 d1m3va1 d2co8a2 d1j2oa2  
d1x63a1 d2cura1 d2cura2 d1x62a2 d1op9a\_ d1y01a1 d1etzb1 d1legj11  
d2gsib1 d1nj9a1 d4jfhdl d1aqk11 d1t2ja\_ d1lo4h1 d1zvyal d3v4v11  
d4enec1 d1kxtb\_ d5e8ea1 d2pxya\_ d4weud\_ d1xiwc\_ d2esvd1 d1qnzh\_  
d1ogae1 d1f4xh1 d4n1hb\_ d3ezjb1 d3mlw11 d1kfah1 d1etza1 d1b4jh1  
d3cfic\_ d4w68a\_ d2arja1 d1ek3a\_ d2ok011 d1vera\_ d1uwgh1 d1blnb1  
d1fpth1 d1rzga1 d2giya1 d4m3kb1 d1nc2a1 d2nyyd1 d1ncna\_ d1fbih1  
d5dxwa\_ d4fqqa1 d1dqdh1 d1jfq11 d1kelh1 d1faih1 d1frgl1 d1figl1  
d4m6n11 d1fo0a\_ d4hxb11 d3b5ga\_ d3quyd1 d2h9gb1 d1i8kb\_ d2dd8h1  
d2ck0h1 d1eaja\_ d4w6wb1 d2a6ib3 d1t66d1 d2e27h\_ d1ob1b1 d1f11b1  
d2v7na1 d1ad0a1 d2xt1b1 d1pskh1 d4i13b1 d2op411 d1a0q11 d1uwel1  
d1za3a1 d1ncb11 d4uu9a\_ d1bm3h1 d1cloh1 d1nqba2 d1cf8h1 d4y5va\_  
d1mhph1 d5anma1 d4cdgc1 d4ldeb\_ d1y01b1 d2pcpb1 d1z3gl1 d1dfb11  
d1fh5h1 d3g5xa1 d1tzib1 d4dn311 d3zhka1 d2b1hh1 d2uy1a1 d1f3dh1  
d1nj9b1 d2agjh1 d2h1pl1 d1q72h1 d8fabb1 d1ndmb1 d1rjca1 d4u6hb1  
d3upca\_ d2fbj11 d1osph1 d1tvda\_ d2cjev\_ d4fhbd1 d1bd2d1 d1rz7h1  
d3nn8a\_ d1knoa1 d1nfda1 d2bmkb1 d1dq11\_ d1igyb1 d1igfl1 d12e8h1

d3utza1 d1nc2b1 d1rihh1 d4mwfb1 d4jvpa1 d1mieh1 d1rhfa1 d1fgnl1  
d1sbs1 d1lp9e1 d1dn0a1 d4lqfl1 d1iaih1 d1kgcd1 d1mh5b1 d1gpol1  
d2g60h3 d1f8t11 d2jixd1 d4grwh\_ d1fo0b\_ d1bfob1 d1axsa1 d1u9ka\_  
d1nmbh\_ d1h8na1 d1h8na2 d1jguh1 d4eura1 d3sdy11 d35c8h1 d1w7211  
d1mvub\_ d1i9rh1 d1ob1a1 d4wenb\_ d1yeeh1 d3ietc1 d1f58h1 d1ad0b1  
d1mqk1\_ d1nbvh1 d4b50a\_ d3r8bb\_ d1baf11 d1mamh1 d4rgne1 d2gsgb\_  
d35c811 d1bafh1 d1ailh1 d2pcpa1 d2fath1 d2x1pa\_ d1orsb1 d1libg11  
d1shma\_ d1a2yb\_ d1u0qa\_ d2coqa\_ d1hilb1 d1qfwi\_ d1jv5b\_ d1fn4b1  
d5e0qa\_ d1nsh1 d1plg11 d4ocx11 d1kb5h1 d1rzfh1 d1pg7x1 d2fx7h1  
d2oi9c\_ d1l7il1 d3eyva1 d1d5il1 d4ffyl\_ d1tet11 d1a6wh\_ d1lac6a\_  
d3dvfa\_ d1nfde1 d1mimh1 d1ri8a1 d1jhlh\_ d3dura\_ d1fskb1 d1f97a1  
d3so3b1 d2ak4d1 d1lp9f1 d4z7wf1 d1l7th1 d4y5ya\_ d4x7ec1 d1emth1  
d1ikf11 d1nlbh1 d4utal1 d1bjma1 d1eapb1 d1u6ah1 d2dtgd1 d1kj2b\_  
d1xeda1 d1c1eh1 d1fgvh\_ d2bnub1 d2fb4h1 d2dtgb1 d1ktrh\_ d1jpth1  
d1qkz11 d4hepg\_ d2atpb1 d1flrh1 d2hrp11 d1mvfa\_ d1iaim1 d3k80a1  
d2jb5h1 d3zkxc\_ d4grwe\_ d1it9h1 d1rhhb1 d3w9ec\_ d1e4wh1 d1sy6h1  
d2j6eh1 d3qxta\_ d1jglh1 d1p7ka1 d1tzhb1 d4n8pa1 d1gaf11 d2jelh1  
d1wioa2 d4i0cc1 d1cicb1 d1lmka2 d1lmka1 d1iqwh1 d1lorqb1 d1ejoh1  
d1jnlh1 d4zgl1a\_ d43c9b\_ d1ggbl1 d1wejh1 d3q6fa1 d1f3dj1 d3c61a1  
d1bqlh1 d3p9wb\_ d1a3r11 d1h0db1 d2uzil\_ d1eo811 d1qfwl\_ d1n7ml1  
d1igja1 d1c5ch1 d2a9mh\_ d1rmfh1 d1fj1b1 d4heme\_ d1ccza1 d1a5fh1  
d1ogad1 d1dlfh\_ d1qa9b\_ d1vgel1 d3qskb\_ d1sjxa\_ d4ozfg1 d1sq2n\_  
d1qd0a\_ d1kcvh1 d1c5db1 d3qcull1 d8faba1 d3bn9d1 d1mjuh1 d4y8dc\_  
d7fabh1 d3dvgb1 d1lo011 d1a6tb1 d1gigh1 d1kcrh1 d2hwz11 d1yjdc1  
d3clfl1 d4krna\_ d1d171\_ d1e6o11 d1mexh1 d3r0ma\_ d4kkna\_ d1fnsl1  
d1oaqh\_ d1rzia1 d1ucbh1 d1ncw11 d4b41a\_ d1nfd1 d2mpah1 d2d7t11  
d4grwf\_ d4b5ea\_ d1lk3h1 d3u79a\_ d4u3xa\_ d1ghf11 d1bvkb\_ d1mcww1  
d1b88a\_ d1jrrh1 d32c2b1 d4wemb\_ d1dsfh\_ d1op3h1 d1ce111 d1iqda1  
d1qoka1 d1qoka2 d1qfuh1 d2crya1 d1ay1h1 d1oaql\_ d3ab0b\_ d1rur11  
d1t4kb1 d1bz7b1 d1n0xh1 d1for11 d1ucb11 d4w6yb\_ d43c9a\_ d2aab11  
d1tzia1 d4n1ca\_ d1k6qh1 d3g9ab\_ d4tvsa1 d1igmh\_ d1pz5b1 d3dx9a1  
d3wxwh\_ d1nakh1 d1kcull1 d3eaka\_ d4qlra1 d1cr911 d1d9ka\_ d1f4x11  
d1deea1 d2i27n2 d1c12a1 d2orb11 d1j8hd1 d1mcph1 d1c5da1 d1kenh1  
d1bd2e1 d1h5ba\_ d4x7fc1 d3upaa\_ d1t3fa1 d1indh1 d2dtgc1 d4hc111  
d1zv5a1 d4wgvb\_ d1uwgl1 d4f37k1 d1aqkh1 d1vesa\_ d3zkqd\_ d1fpt11  
d1l0411 d1knob1 d3rrqa\_ d1ct8b1 d4orz\_ d1mlbb1 d4hgkc1 d1dqd11  
d1bogb1 d4ozhe1 d1dr9a1 d1i7za1 d1dn0b1 d1kell1 d1rzib1 d1ypzf1  
d1wtla\_ d1hkfa\_ d1fail1 d1figh1 d2vyre\_ d1sjva\_ d1ohqa\_ d1bfoa1  
d1pkqb1 d1mjul1 d1b4j11 d1nsl1 d2arjb1 d1p4bh\_ d4aj0a\_ d3nn8b\_  
d2rcja1 d1f2xk\_ d4v1dd\_ d1adqh1 d2eksa\_ d4k3ga\_ d1jfqh1 d1uweh1  
d1frgh1 d4gftb\_ d1uz8b1 d4n1lea\_ d1bm311 d1clol1 d3mcka1 d2vq1a1  
d1ae6h1 d4aq1b1 d1uj3b1 d1nbqa1 d1fh511 d2ck011 d2ywza\_ d1q7211  
d4nxbx\_ d1hila1 d4hz1b1 d2j8811 d1zmya1 d1cd0a\_ d1a4ka1 d1psk11  
d1a0qh1 d4krmb\_ d1ncbh1 d2fbjh1 d1j8he1 d1i3ua\_ d1cf811 d1fe8h1

d2p1ya1 dleeqa\_ d2x89a\_ d1o10a\_ d2r01h1 d1ub5a1 d1dfbh1 d3eyvb1  
d4jdvb1 d4p2cg\_ d2gsia1 d2agj11 d1u3ha1 d2h1ph1 d1rih11 d1fskc1  
d1boga1 d2a7711 d1osp11 d1qfoa\_ d3dwta\_ d2fx711 d1rz711 d3stba1  
d1pkqa1 d1b6da1 d1dzba2 d1dzba1 d1kj2a\_ d411ha\_ d1rzgb1 d1dq1h\_  
d12e811 d1miel1 d1jmaa\_ d1sbs11 d1fgnh1 d1f5811 d1mqkh\_ d1ndgb1  
d3qeg11 d1ia11 d2aw2a1 d1tqbc1 d3fo2a1 d4dkaa\_ d1f8th1 d2g6011  
d2ywy\_ d1uj3a1 d1yc7a\_ d3bd3a\_ d4w6xb1 d1nmb1\_ d1i8ka\_ d1rj1b1  
d1ypze1 d1p7kb1 d1kxqe\_ d1gpoh1 d2z4qa1 d1w72h1 d1i9r11 d4qgya1  
d4xt1c\_ d2qqnh1 d1cica1 d3c08h1 d2cd0a\_ d2bdnh1 d1hnga1 d1mam11  
d1nldh1 d1cr9h1 d41cih1 d3bkyh1 d3qg711 d1ai111 d1kxvc\_ d4iosd\_  
d117ih1 d2x1qa\_ d1ub6b1 d3k74b\_ d1ibgh1 d1teth1 d1igya1 d1hxma1  
d2x6ma\_ d2e71a\_ d5e03a\_ d1qfwm\_ d2r0kh1 d1igjb1 d1rurh1 d1plgh1  
d1mj8h1 d1yuhb1 d3fmg11 d1rzfl1 d1emt11 d1ad9b1 d1igtb1 d1nlb11  
d1d5ih1 d3k7ua\_ d4ffyh\_ d1bwwa\_ d3dvga1 d1a6ta1 d1fgvl\_ d4qxgl1  
d1mim11 d1jh11\_ d2hffb1 d2hh011 d1qkzh1 d117t11 d1afvh1 d1iaii1  
d2cjuh\_ d1um5h1 d2ghwb2 d2ghwb1 d1kgce1 d2fgwh1 d1ikfh1 d1dvfd\_  
d2i24n1 d2xtjb\_ d1za3b1 d2yc1a\_ d2hh0h1 d2x1oa\_ d1bvka\_ d1rj1a1  
d5e7ba1 d1igta1 d1i11b1 d2fb411 d1mvua\_ d1jpt11 d32c2a1 d1fvca\_  
d1iqdb1 d2hrph1 d2p4ab\_ d4qo1a\_ d1p2cb1 d1wt5c\_ d1t4ka1 d5c1mb\_  
d1it911 d1bz7a1 d1b2wh1 d1e4wl1 d1jn111 d1yedb1 d1za6b1 d3u7aa\_  
d1igfh1 d3gnm11 d1orsa1 d1wejl1 d1a2ya\_ d1hxmb1 d1gafh1 d2j4wh1  
d1pz5a1 d1j05a\_ d1a3rh1 d4fq111 d1qfwh\_ d1eo8h1 d1n7mh1 d4s11a\_  
d1kegh1 d5da4a\_ d1iqw11 d3whxb1 d1vgeh1 d1deeb1 d1c12b1 d1t2q11  
d1ad9a1 d3gsnb1 d3b2uc1 d1ggbh1 d1t3fb1 d1nak11 d4ocmc\_ d1lila1  
d2v7hb3 d2esve1 d1mcoh1 d2qr0b1 d2q3aa\_ d1ct8a1 d1kcr11 d2pxyb\_  
d2uzih\_ d5c31d\_ d3durb\_ d1c5c11 d2ak4e1 d1d17h\_ d1xiwd\_ d1mlba1  
d1rmf11 d1i7zb1 d1dlf1\_ d2xa3a\_ d5bq7b1 d1dqqb1 d3h4211 d1legjh1  
d1kcv11 d1fe811 d2j6e11 d1f3rb2 d11k311 d1sm3h1 d1q0xh1 d1ghfh1  
d7fab11 d1igch1 d11o0h1 d4idla\_ d5c2b1\_ d1jrh11 d1i11a1 d3zhda1  
d4kfzc\_ d1b0wa\_ d1e6oh1 d1mex11 d4krpb\_ d1fnsh1 d1ncwh1 d4hgma\_  
d4eigb1 d4rzca\_ d2mpa11 d4y5xa\_ d5en2b1 d3lrga1 d4ej1c1 d1rhha1  
d1j05b\_ d1forh1 d1q9wb1 d2wzpd\_ d2aq2a1 d1h0da1 d3revb1 d2ij0c1  
d1tzh1 d4m7j11 d1k6q11 d3b9kc1 d1igml\_ d3qeua1 d1dsfl\_ d1celh1  
d1kcu1 d1zvha1 d1zvoa1 d1tqbb1 d1ay111 d2qsc11 d2cgrh1 d1n10h1  
d1ken11 d3eo0a1 d4n9ob1 d1n0x11 d3k1kc\_ d2aq2b1 d1ck1a1 d1enf1  
d1i4pa1 d1v1oa1 d1et9a1 d1esfa1 d2g9hd1 d4ohja1 d1klud1 d1bxta1  
d1eu3a1 d1ty0a1 d1fnua1 d2qaln1 d2cqva1 d1fhga\_ d2k1ma\_ d2d12a1  
d1biha3 d1biha1 d1biha4 d3qp3a1 d1g1ca\_ d1gxea\_ d1cvsc2 d1cvsc1  
d1xmwa2 d1m4ka2 d2otpa2 d1biha2 d1rhfa2 d2fcba2 d2fcba1 d1gsma2  
d1epfa1 d1epfa2 d2dava1 d1waaa\_ d1f97a2 d1x44a1 d1vcaa2 d1fnla2  
d1fnla1 d3b5ha2 d3h8na2 d3h8na1 d1jbja1 d1jbja2 d1pd6a\_ d1f2qa2  
d1f2qa1 d3cx2a\_ d1nbqa2 d3b5ha1 d1n26a1 d1xiwb\_ d1xaua\_ d1fltx\_  
d2ifga1 d1olla1 d1olla2 d1cs6a4 d1cs6a3 d1cs6a2 d1cs6a1 d2gw5a2  
d1sy6a1 d1xiwa\_ d1lucta2 d1lucta1 d1ry7b2 d1gl4b\_ d1qz1a3 d1olza1

d2c9aa1 d1wwca\_

**Family-99 (g.39.1.2)**

**Positive dataset contains 6 protein sequences.**

d3cbba\_ d1ynwa1 d1r4ia\_ d2hana\_ d2hanb\_ d2enva1

**Negative dataset contains 3989 protein sequences.**

d1m32a\_ d1libja\_ d1c7na\_ d1iuga\_ d4q75a\_ d2bkwa1 d1t3ia\_ d1qz9a\_  
d1jff9a\_ d1eg5a\_ d1p3wa\_ d3kgwa\_ d1c11a\_ d2ctza1 d1vjoa\_ d2rfva\_  
d1gc0a\_ d1cs1a\_ d1d2fa\_ d2ch1a1 d1qgna\_ d1pffa\_ d1elua\_ d1tq5a1  
d1u08a\_ d11c5a\_ d1b5pa\_ d2ay1a\_ d1bw0a\_ d3pd6a\_ d7aata\_ d2csta\_  
d1j32a\_ d4wlha\_ d1o4sa\_ d1v2da\_ d1gdea\_ d1m6sa\_ d1v72a1 d1svva\_  
d1ajsa\_ d1wsta1 d2f8ja2 d11k9a\_ d1vp4a1 d1xi9a1 d2gb3a1 d1yaaa\_  
d2bnma2 d3i2ka1 d1mpxa2 d1xkta1 d2hfka\_ d1jmkc\_ d5d3ka\_ d2cfba1  
d1dfoa\_ d1o69a\_ d1bj4a\_ d3k28a\_ d2bwpa\_ d3lg0a\_ d2fnua\_ d3ou5a\_  
d1z7da1 d1b9ha\_ d1iaya\_ d4msoa\_ d1bs0a\_ d1s0aa\_ d1sffa\_ d3tqxa\_  
d1mdoa\_ d3qboa\_ d3pgya\_ d1bjna\_ d2dkja\_ d1ejia\_ d1vefa1 d4wxga\_  
d3bs8a\_ d3gbxa1 d1w23a\_ d1i26a\_ d1f56a\_ d1bypa\_ d1azca\_ d1ws8a\_  
d3u25a\_ d1cuoa\_ d1id2a\_ d1rkra\_ d2iaac\_ d4dp1x\_ d1nwpa\_ d2gima\_  
d2i7sa\_ d1qhqa\_ d3ehbb1 d1fftb1 d1gyca3 d1hfua2 d1kbva1 d1kbva2  
d1sdda1 d1sdda2 d1gyca1 d1gyca2 d1mzya1 d2bw4a1 d1aoza1 d1aoza3  
d1aoza2 d1kyaa3 d1kyaa1 d1mzya2 d4e9sa1 d1sddb1 d1sddb2 d1hfua1  
d1hfua3 d1oela2 d1oela1 d1v10a2 d1v10a3 d1v10a1 d1a3qa1 d1iknc\_  
d3brda1 d1p7h11 d1oy3c\_ d1imhc1 d1gjia1 d1zk9a1 d2cxka1 d2bema\_  
d1pama1 d1qhoa1 d2fhfa2 d2fhfa1 d1k3ia1 d1j0ha1 d1csla1 d2bhua1  
d1edqa1 d1f1sa2 d1ut9a2 d1gvia1 d1txka1 d4alac\_ d1pjwa\_ d1s6na\_  
d3uzqb\_ d2phla2 d1fxza2 d1fxza1 d1lrha\_ d1uija1 g1dgw.1 d2v09a\_  
d1uika2 d1uika1 d1dgwa\_ d1ep0a\_ d2pa7a1 d1wlta1 d1nxma\_ d2c0za1  
d1ktja\_ d1ds6b\_ d1fstb\_ d1g0da1 d1v70a\_ d2f4pa1 d1yhfa1 d2b5ea2  
d2b5ea3 d2b5ea1 d2b5ea4 d2kp1a1 d2kp2a1 d1hyua3 d1hyua4 d1j08a1  
d1j08a2 d3nvva1 d1krha3 d2h88b1 d1n62a2 d1t3qa2 d1kf6b2 d1zoyb1  
d1jq4a\_ d1ffva2 d1dgja2 d1rm6c2 d1mqta\_ d1d4m3\_ d1fmd3\_ d2mev1\_  
g1aym.1 d1ev13\_ d4q4w1\_ d1r1a3\_ d2x5ia\_ d1rhi1\_ g1r1a.1 g1d4m.1  
g1rhi.1 d1b35b\_ d1loopa\_ d1tme1\_ d4iv1a\_ g1pvc.1 g1fpn.1 d1fpn1\_  
d4gb31\_ d1d4m1\_ d1fmd1\_ d1ev11\_ d2wzr3\_ d1qqp3\_ g1fmd.1 d2x5ic\_  
d1rhi3\_ g1oop.1 d1hxs1\_ g1hxs.1 d1fpn3\_ d1bev1\_ g2mev.1 d1eah3\_  
d1aym1\_ d1pvc3\_ d1qqp1\_ d1zba3\_ d1h8ta\_ d3vbhc\_ g1b35.1 g1bev.1  
d1hxs3\_ g1ev1.1 d1bev3\_ g1tmf.1 d1tmf1\_ d1b35a\_ d2mev3\_ g1eah.1  
g1h8t.1 d1eah1\_ d4q4w3\_ d1r1a1\_ d1aym3\_ d1pvc1\_ d1zba1\_ d1h8tc\_  
d1oopc\_ d1tme3\_ g1qqp.1 d4iv1c\_ g1tme.1 d1r0ka3 d1vkoa2 d1vm6a2  
d3qvsa2 d1gr0a2 d1p1ja2 d2ovga\_ d1sq8a\_ d1rzsa\_ d3kz3a\_ d3orca\_  
d3gpdg2 d2q49a2 d1hdgo2 d2g17a2 d2cvoa2 d2czca1 d3pwka2 d1obfo2  
d1i32a2 d1zyao2 d2pkqo2 d1b7go2 d2hjsa2 d1cf2o2 d1vkna2 d1nvmb2  
d4lt9a1 d3tc7a1 d3hoja\_ d1i4na\_ d3vnda\_ d3nl8a1 d1geqa\_ d3nav1  
d1v5xa\_ d4a2ra1 d3tc6a1 d1ujpa\_ d4ijba\_ d1xcfa\_ d1vc4a\_ d1rd5a\_  
d1qopa\_ d3b5va\_ d2msya\_ d2djoa1 d2r5za\_ d1au7a1 d1f43a\_ d2lmda1

d1akhb\_ d1s7ea1 d3nara\_ d1zq3p1 d2craa1 d1mija\_ d4uuta\_ d3a01a\_  
d1x58a1 d3rkqa1 d3cmya1 d2cqxa1 d2da6a1 d1e3oc1 d1fjla\_ d1mh3a1  
d1ig7a\_ d1x41a1 d1wh7a1 d1gt0c1 d2mw8a\_ d1lfup\_ d1x2ma1 d1b72a\_  
d1wi3a1 d1jgga\_ d1wjha1 d1x2na1 d1mnm\_ d2cuea1 d3k2aa\_ d2hosa\_  
d2jwta2 d1pufa\_ d1octc1 d2hi3a\_ d1b8ia\_ d4j19a\_ d3lnqa\_ d1wh5a1  
d1b8ib\_ d2cgra1 d1guua\_ d1ug2a1 d2cqqa1 d2ajea1 d4a69c\_ d1h8ac1  
d2crga1 d2iw5b1 d1xc5a1 d1ofcx1 d2cu7a1 d1wgxa1 d2cjja1 d2ckxa1  
d1gvda\_ d1hcra\_ d1tc3c\_ d1gdta1 d1u78a2 d6paxa1 d6paxa2 d1k78a1  
d1k78a2 d1xg1a1 d1hlva1 d1iufa2 d1iufa1 d1igna2 d1gyta2 d3lv8a\_  
d1s3ga1 d1zaka1 d1s4qa\_ d3tvta2 d1uf9a\_ d1khta\_ d1ckea\_ d1losna\_  
d1p5zb\_ d4tmka\_ d3cm0a\_ d1tmka\_ d1jaga\_ d3h86a\_ d1t0hb\_ d1nn5a\_  
d2h92a\_ d3kb2a1 d2c95a1 d1yj5a2 d1kgda\_ d1ly1a\_ d2ak3a1 d1vyva2  
d1deka\_ d2grja1 d1p3ja1 d1y63a\_ d1e4ya1 d1s96a\_ d3iija1 d1lvga\_  
d1nksa\_ d1vyua2 d4e22a\_ d1qf9a\_ d1q3ta\_ d1ki9a\_ d1lw7a2 d1teva\_  
d1kjwa2 d1gsia\_ d1uj2a\_ d4gi7a\_ d2jeoa1 d1rz3a\_ d1z0ja1 d3umra2  
d3gj0a1 d2gaoa1 d1yzga1 d1x3sa1 d1g7sa4 d1puja\_ d1udxa2 d1kk1a3  
d2o52a\_ d1jwyb\_ d1zcaa2 d1zcba2 d2fv8a1 d2cjwa\_ d3dz8a1 d1xzpa2  
d1vg8a\_ d4qxaa\_ d2ew1a1 d1x1ra1 d2bcgy\_ d3doea1 d3cona\_ d3rega\_  
d3wyga\_ d1upta\_ d2b6ha1 d1zd9a1 d1lnza2 d1r5ba3 d1n0ua2 d1r2qa\_  
d2f91a1 d2rhda\_ d3q3jb\_ d3q85a\_ d1efma1 d1r8qa\_ d2gf9a1 d2akab1  
d1ek0a\_ d1z08a1 d2gcoa1 d2dy1a2 d4g01b\_ d2cxa1 d1svia\_ d3q72a\_  
d1ni3a1 d4ac9a4 d2erxa1 d2bmea\_ d1wxqa1 d2gf0a1 d4ldja1 d1zunb3  
d1d5ca\_ d4lv5b\_ d1efca3 d1kmqa\_ d2g6ba1 d3lrpa\_ d1tada2 d2y8ea\_  
d4rd4a1 d1z06a1 d2heia\_ d3a58b\_ d1u01a2 d1d2ea3 d1zj6a1 d2ocba\_  
d3rwoa\_ d1mr3f\_ d2e9sa1 d4u5xa1 d2iwra\_ d2fn4a1 d3bwdd\_ d2nzja1  
d2atva1 d2ksqa\_ d3l43a\_ d1mkya2 d1mkya1 d1wmsa\_ d1jnja3 d2rmka\_  
d1f6ba\_ d1f60a3 d1gota2 d1jala1 d2fh5b1 d1g16a\_ d2wblc\_ d1m7ba\_  
d1wf3a1 d1f5na2 d1t9ha2 d1z6xa1 d1z0aa1 d2fg5a1 d2a5ja1 d2bcjq2  
d1s0ua3 d1ky3a\_ d4y0va\_ d4lhwa\_ d2qmea1 d2atxa1 dlegaa1 d1ryha\_  
d1moza\_ d1nrjb\_ d2erya1 d3bfka\_ d1puia\_ d1fzqa\_ d3j3az1 d3t5ga\_  
d1shza2 d3defa\_ d2f7sa1 d3raba\_ d3tsoa\_ d3aq4a\_ d2a17a1 d3sfva1  
d3bc1a\_ d2ncda\_ d1sdma\_ d3h4sa1 d2heha\_ d2grya\_ g3kin.1 d1kk8a2  
d1br2a2 d1goja\_ d1f9va\_ d2mysa2 d1lkxa\_ d3t0qa\_ d4db1a1 d3gbja\_  
d1ry6a\_ d1v8ka\_ d1k8ka2 d1k8ka1 d3uleb1 d3i33a2 d3i33a1 d1dkgd2  
d1dkgd1 d4ci6a2 d1jcfal d4a2ba2 d2fxua1 d1yaga2 d1yaga1 d4cbua2  
d1bupa2 d1czan2 d1czan3 d1czan1 d1ig8a2 d1czan4 d1bg3a4 d1bg3a3  
d1bg3a2 d1bg3a1 d3h3no1 d3h3no2 d3ezwa2 d1zc6a1 d1zbsa1 d1zbsa2  
d1zc6a2 d2ch5a2 d2ch5a1 d1zxo2 d1zxo1 d1hroa\_ d4gedb\_ d3zooa\_  
d1mz4a\_ d1gu2a\_ d1f1fa\_ d1dvva\_ d1c6ra\_ d1c75a\_ d1e29a\_ d1gdva\_  
d1cnoa\_ d1h32b\_ d1co6a\_ d2bh4x\_ d2aiua\_ d5cytr\_ d1jdl\_ d1i8oa\_  
d2zboa\_ d3dmia\_ d1ls9a\_ d1wvec\_ d2yk3a\_ d3ph2b\_ d1dw0a\_ d5aura\_  
d1ql3a\_ d1qn2a\_ d1f1ca\_ d3sita1 d1evsa\_ d1pvhb\_ d1z7ca\_ d1huwa\_  
d1bgea\_ d1rhga\_ d1f6fa\_ d1f45b\_ d1i1rb\_ d1axia\_ d1etea\_ d3tgxb\_  
d1scfa\_ d2z3qa1 d3qbl\_ d1m48a\_ d4nkqb\_ d1eera\_ d1v7mv\_ d5e4ea\_

d2o27a\_ d3b5ka\_ d2psma1 d4zf7a\_ d3uf5a\_ d4x51a\_ d1d9ca\_ d4ypgc1  
d3oq3a\_ d1lqsl\_ d1n1fa\_ d1aula\_ d1wu3i\_ d3besl\_ d3ux9a\_ d3rbaa\_  
d2qtra\_ d1nupa\_ d3l92a\_ d1f9aa\_ d1qjca\_ d2h29a\_ d1vlha\_ d1lw7a1  
d1mrza2 d4ruka\_ d3wdpp1 d3wq5a\_ d1gnxa\_ d4gxpa\_ d4hz8a\_ d3aiua\_  
d1wcga1 d1qvba\_ d3ahxa\_ d1v02a\_ d2dgaa\_ d1pbga\_ d1vffa1 d1qoxa\_  
d4ha4a\_ d2e17a\_ d1iq0a2 d1irxa2 d1r6ta2 d1ivsa4 d2cyba\_ d1rqga2  
d1j09a2 d2yxna\_ d1f7ua2 d1h3fa1 d1ffya3 d2g36a1 d1nzja\_ d1jila\_  
d1n3la\_ d1i6la\_ d1pfva2 d1h3na3 d3n9ia\_ d3sz3a1 d1m4la\_ d2bk7a\_  
d3fjua\_ d1z5ra1 d1kwma1 d1uwya2 d1jqga1 d2c1ca1 d1h8la2 d3sw2a\_  
d1moxc\_ d1edmb\_ d1autl2 d1autl1 d1nqlb\_ d1dval1 d1szba2 d1kigl\_  
d2y5fl\_ d1ijqa2 d1gk5a\_ d1g1sa2 d1nt0a3 d1xdtr\_ d1lmja2 d1lmja1  
d1nzia2 d2wphe\_ d1klil\_ d1pfxl2 d1pfxl1 d1p9ja\_ d1g1ta2 d1f7ea\_  
d4yzub\_ d1m1xb5 d2y5ia\_ d1qlsa\_ d1psra\_ d3n22a\_ d2egda\_ d4ggfc\_  
d2wcea\_ d2luca\_ d4aqia\_ d3nsia\_ d2lp3a\_ d1j55a\_ d1a4pa\_ d1k8ua\_  
d1nsha\_ d1pvaa\_ d3fs7a\_ d2pvba\_ d1ttxa\_ d1rwya\_ d2kyfa\_ d1rk9a\_  
d1a75a\_ d1exra\_ d1tiza1 d1nyaa\_ d1g8ia\_ d1wdcc\_ d3fwba\_ d1ggza\_  
d2o5ga\_ d1ctaa\_ d1m45a\_ d3i5gc\_ d1sl8a\_ d1fpwa\_ d2scpa\_ d2roaa\_  
d4aqra\_ d3pn7b\_ d1br1b\_ d2mysb\_ d1s6ca\_ d1bjfa\_ d2obha\_ d1jfka\_  
d1jf0a\_ d1qv0a\_ d1lkja\_ d2mlfc\_ d2m97a\_ d2d8na\_ d4by5a\_ d1jbaa\_  
d4nqga\_ d1wdcb\_ d2mysc\_ d1j7qa\_ d1s6ia\_ d1uhka2 d1r2ua\_ d1dtla\_  
d3kf9a\_ d3pn7c\_ d1qjta\_ d1fi6a\_ d1c07a\_ d5d67d\_ d1tuza\_ d1h8ba\_  
d1eg3a1 d1eg3a2 d2zkmx1 d1snla\_ d1y1xa\_ d1hqva\_ d1dvia\_ d1df0a1  
d1qxp2a\_ d4usla\_ d1k94a\_ d1wkya2 d1uuqa\_ d3wh9a\_ d4mlra\_ d1xyza\_  
d4xuya\_ d2je8a5 d4bf7a1 d3cuia\_ d1ur4a\_ d1qw9a2 d1lodza\_ d2vzsa5  
d1bqca\_ d2x2ya1 d1hjqa\_ d1qnra\_ d4y7ea1 d1vjza\_ d4k68a\_ d2v3ga\_  
d4hpga\_ d1nofa2 d1nq6a\_ d1h4pa\_ d1aq0a\_ d3ziza\_ d4bs0a\_ d1ecea\_  
d1h1na\_ d1ta3b\_ d1w91a2 d1ilwa\_ d1uhva2 d1us3a2 d1legza\_ d7a3ha\_  
d1tvna1 d3nyda1 d1ghsa\_ d2cyga1 d4xv0a\_ d2c8na2 d1w32a\_ d3emca\_  
d1v6ya1 d1foba\_ d2uwfa1 d2fgla\_ d3niya1 d2c0ha1 d1rh9a1 d1yq2a5  
d1szna2 d1fa2a\_ d1pama4 d5do8a1 d1ea9c3 d1hx0a2 d2fhfa5 d1qhoa4  
d1avaa2 d1m53a2 d4m8ua1 d2gjpa2 d1lwha2 d4howa1 d1j0ha3 d3vm5a1  
d2x1ia\_ d1wzaa2 d1uasa2 d2diea1 d1mxga2 d1ht6a2 d1eswa\_ d1iv8a2  
d5cpsa\_ d1ud2a2 d1zjaa1 d3gbea1 d1kwga2 d1wdpa\_ d1gcya2 d1g5aa2  
d1hvxa2 d3dhpa2 d2bhua3 d4do4a1 d3qgva1 d1e43a2 d1g94a2 d2d3na2  
d1gjwa2 d1gvia3 d1x1na1 d1r7aa2 d1tz7a1 d2x42a1 d1tr9a1 d3abza1  
d4c7ga2 d2gjxa1 d1jaka1 d1yhta1 d4toqa\_ d1wb0a1 d1w9pa1 d1itxa1  
d1kfwal d1goia2 d1edqa2 d2gsja\_ d1hjxa1 d1jnda1 d1vf8a1 d1etob\_  
d1umqa\_ d1g2ha\_ d1mixa2 d1e5wa2 d1j19a2 d1isna2 d2a16b2 d1g4ma1  
d1g4ma2 d2v76a\_ d1wj1a1 d1qqga2 d1qqga1 d1ntva\_ d1n3ha\_ d4dbba\_  
d3f0wa1 d1p3ra\_ d1wgua1 d2cy4a1 d3hqca\_ d1wvha1 d1xr0b1 d1wgqa1  
d1v89a1 d2coda1 d1zc3b\_ d1wg7a1 d1u5ea1 d1v61a1 d2coca1 d2ys1a1  
d1v5pa1 d1ntya2 d1wjma1 d1wil1a1 d1u29a\_ d1xx0a1 d1unqa\_ d2zkmx3  
d1fhoa\_ d1v88a1 d2adza1 d1x1fa1 d1p6sa\_ d2coaa1 d1btka\_ d1v5ma1  
d1faoa\_ d2x18a\_ d1dyna\_ d1x1ga1 d4kaxb\_ d2j59m1 d1kilb2 d1xcga2

d1txda2 d1u5da1 d1dbha2 d1w1ha\_ dlupqa\_ d1v5ua1 d1foea2 d2fjla1  
d1eaza\_ d2dfka2 d2cofa1 d1kz7a2 d1h6ua1 d9ldta1 d2ewda3 dlup7a1  
d2dfda1 d1s6ya1 d1vjta1 d7mdha1 d1hyea1 d1t2da1 d1ojsa3 d1b8pa1  
d1ldna1 d1hyha1 d1civa1 d2a92a1 d1i0za1 d1y6ja1 d1gv0a1 d1ur5a1  
d1llda1 d1obba1 d1v8ba1 d1gdha1 d1l7da1 d2dlda1 d1mx3a1 d1ygya1  
d1qp8a1 d1li4a1 d1j4aa1 d2naca1 d1npya1 d3t4ea2 d1a4ia1 d1o0sa1  
d2hk9a2 d2egga2 d1b26a1 d1bvua1 d1gq2a1 d1clda1 d1leha1 d1gtma1  
d1euzal d1nvta1 d3dona2 d1edza1 d1gpja2 d1vi2a1 d1p77a1 d1nyta1  
d1b0aa1 d1v16a1 d1v9la1 d1txga2 d3f47a1 d1mv8a2 d2pv7a2 d1xc2a3  
d2ahra2 d4xiya1 d2f1ka2 d1pgja2 d1i36a2 d1np3a2 d1lj8a4 d1teaa3  
d1qmgga2 d2i76a2 d2g5ca2 d1wdka3 d1dlja2 d3cuma3 d1kola2 d1f8fa2  
d1qora2 d1jqba2 d1vj0a2 d1cdoa2 d1gu7a2 d1d1ta2 d1xa0a2 d2dm6a2  
d1jvba2 d1rjwa2 d1llua2 d1h2ba2 d1tt7a2 d1piwa2 d1o89a2 d1iz0a2  
d1e3ja2 d1yb5a2 d1uufa2 d1vj1a2 d1e3ia2 d3gpdg1 d1vc2a1 d2nvwa1  
d1u8fo1 d1ydwa1 d1hdgo1 d2g17a1 d1cf2o1 d2czca2 d1r0ka2 d1obfo1  
d2cvoa1 d1ebfa1 d1h6da1 d1i32a1 d1zh8a1 d2q49a1 d1qkia1 d1j5pa4  
d3pzra1 d1xeea1 d1vkoa1 d1vm6a3 d3qvsa1 d2pkqo1 d1b7go1 d1gr0a1  
d1p1ja1 d1lc0a1 d1j0xo1 d3pwka1 d2hjsa1 d1zyao1 d1vkna1 d1tltal  
d1nvmbl d3sjua\_ d3ojfa1 d1xu9a1 d2jjya1 d1n7ha\_ d1y1pa1 d1h5qa\_  
d1jtva\_ d4fs3a\_ d2bkaa1 d1gy8a\_ d2c5aa1 d1ulsa\_ d1ooea\_ d2b69a1  
d1y5ma1 d1spxa\_ d1aela\_ d1bxka\_ d1ydea1 d1gega\_ d1hdoa\_ d1o5ia\_  
d1e6ua\_ d1snya1 d2rhca\_ d3zv4a\_ d5ceja\_ d2d1ya1 d1fjha\_ d3w8ea\_  
d2fmua1 d1x1ta\_ d1rpna\_ d3ay7a1 d1k2wa\_ d1eq2a\_ d2hrba1 d3ruaa\_  
d2ew8a1 d4hwka\_ d1xgka\_ d2bd0a1 d1yo6a1 d2a35a1 d2ntva\_ d1vl8a\_  
d1hdca\_ d4bkua\_ d2ag5a1 d2q45a\_ d1nffa\_ d4iy1a\_ d1zbqa1 d1kewa\_  
d1ek6a\_ d1ja9a\_ d2q46a2 d1iy8a\_ d1cyda\_ d2ptga\_ d1hxha\_ d1uzma1  
d3lyla\_ d4m89a\_ d3wyea\_ d2blla1 d1w6ua\_ d1sb8a\_ d2q2va\_ d4nr0a\_  
d1e6wa\_ d2gasa\_ d3oiga1 d2bgka1 d1mxha\_ d1vl0a1 d1rkxa\_ d1r6da\_  
d1wmaa1 d1e7wa\_ d2c07a1 d1xkqa\_ d3tzha\_ d1g0oa\_ d3lz6a\_ d1qyca\_  
d1ledoa\_ d1oc2a\_ d1t2aa\_ d1zema1 d2xoxa\_ d1z45a2 d1geea\_ d1p33a\_  
d3lt0a\_ d4e6pa\_ d2wyua\_ d1db3a\_ d4q9na\_ d1xhla\_ d4o1ma\_ d1fmca\_  
d2uvda\_ d2gdza1 d1uaya\_ d2z1ma\_ d2o23a2 d2fr1a2 d2fr1a1 d1qsga\_  
d1qyda\_ d4zjua\_ d2a4ka1 d1yb1a\_ d1wvga1 d1yxma1 d3f4ba\_ d1mg5a\_  
d1xg5a1 d1r55a1 d3gboa\_ d1atla\_ d1kufa\_ d1buda\_ d4q1la\_ d1quaa\_  
d1yp1a\_ d1wnia\_ d2gfoa1 d1vjva\_ d2ayna1 d3nhea\_ d4c5pa\_ d2bsza1  
d4bgfa\_ d1w4ta1 d1ex0a4 d1g0da4 d2f4ma1 d1x3za\_ d1mdwa\_ d1qxpa4  
d1ziva1 d1zcma1 d1t3ca\_ d1epwa3 d2a97a\_ d3f1ea\_ d3ioqa\_ d1fh0a\_  
d1o0ea\_ d1khqa\_ d1m6da\_ d2cb5a\_ d1cs8a\_ g8pch.1 d1s4va\_ d2pnsa\_  
d1vsna1 d1mira\_ d1iwda\_ d2oula\_ d7pcka\_ d3bwka\_ d3bcna\_ d2p86a\_  
d1pvja\_ d1pcia\_ d1gece\_ d1deua\_ d4bs6a\_ d1xkga1 d1cqda\_ d1jqpa2  
d2c0ya\_ d2bdza\_ d3p5ua\_ d1ex4a2 d1c6va\_ d2jk6a2 d2jk6a1 d1fecal  
d1fecal d1lpfa1 d1lpfa2 d1xhca1 d1xhca2 d1dxla2 d1dxla1 d1gera2  
d1m6ia2 d1onfa1 d1onfa2 d3lada2 d3lada1 d1w4xa1 d1w4xa2 d1gesa2  
d1mo9a1 d1xdia1 d1fl2a2 d1fl2a1 d1fcda1 d1fcda2 d1h6va2 d1h6va1



d1mo9a2 d1gv4a2 d1gv4a1 d2gv8a2 d2gv8a1 d1aoga2 d1hyua1 d1ebda1  
d1ebda2 d3dk9a1 d1q1ra2 d1q1ra1 d1gesa1 d1zbfal d2z1ha\_ d2etja1  
d3qioa1 d1j11a\_ d2e41a\_ d1j12a\_ d21sna1 d1io2a\_ d1uaxa\_ d2yv0x\_  
d1mu2a1 d1lekea\_ d1i39a\_ d1pn0a1 d1reoa1 d1ju2a1 d2f5va1 d3c96a1  
d2gmha1 d1gpea1 d1o5wa1 d1n4wa1 d1k0ia1 d2dw4a2 d2ivda1 d1seza1  
d2voua1 d1kdga1 d2bcgg1 d2bcgg2 d1ix2a\_ d1v58a1 d1t3ba1 d4ilfa2  
d4npba2 d1jmxa4 d1pbya3 d1pbya4 d1jmxa2 d1pbya1 d1pbya2 d1r7ha\_  
d1faaa\_ d1wika1 d1xfla\_ d1ttza1 d2f51a1 d1ti3a\_ d1nhoa\_ d1sena\_  
d2i4aa\_ d1ep7a\_ d1zmaa1 d1fo5a\_ d3lefa1 d3diea1 d2yana1 d1z6na1  
d1oaza\_ d3zywa1 d4aj8a\_ d1nm3a1 d4fiwa\_ d1wmja\_ d4hs1a1 d1liloa\_  
d1xwaa1 d1wjka1 d2vm1a\_ d1fb6a\_ d1gh2a\_ d1h75a\_ d1nw2a\_ d1kx5b\_  
d3a6na\_ d4m6ba2 d2nqbd\_ d3wkjd\_ d2yfwe\_ d4h9na\_ d5bnxa\_ d1kx5c\_  
d3r45a\_ d1eqzb\_ d4jjnb\_ d1f66c\_ d1eqza\_ d4wnnb\_ d1kx5a\_ d1u35c1  
d1id3a\_ d2nqbc\_ d1kx5d\_ d1tafa\_ d1tafb\_ d1jfib\_ d1q9ca\_ d1h3ob\_  
d2byka1 d1n1ja\_ d4g92b\_ d1bh9a\_ d1jfia\_ d1h3oa\_ d2bykb1 d1n1jb\_  
d1pd212 d1nhya2 d2a2ra2 d1k0dd2 d1f2ea2 d1f3ba2 d2fhea2 d2pvqa1  
d1tw9a2 d1oyja2 d1e6ba2 d1k0ma2 d3ik7a1 d4is0a1 d1r5aa2 d1j1va2  
d1m0ua2 d3gtub2 d1z9ha2 d1okta2 d1axda2 d2gsra2 d1tu7a2 d1k3ya2  
d1zgma1 d1b48a2 d1gnwa2 d1gwca2 d2gsta2 d1glqa2 d1oe8a2 d1pn9a2  
d1v2aa2 d1fw1a2 d1duga2 d1iqca2 d1iqca1 d1eb7a2 d1eb7a1 d1nmla1  
d1niral d1qusa\_ d1qqya\_ d1gd6a\_ d1f6ra\_ d1livma\_ d2gv0a\_ d1iiza\_  
d2z2fa\_ d1j8xa\_ d1gh1a\_ d1b9oa\_ d1741a\_ d1691a\_ d2o4wa\_ d1p37a\_  
d1k28a3 d1xjta1 d1jtma\_ d2f2qa\_ d4e97a1 d1iyka2 d1iyka1 d1rxta1  
d1iica1 d2k4ua\_ d1hp2a\_ d2lu9a\_ d1baha\_ d2meoa1 d1wm7a\_ d1hlya\_  
d1n8ma\_ d1jlza\_ d1wpda\_ d1c55a\_ d1pvza\_ d1wt7a\_ d1rjia\_ d1wz5a\_  
d1m2sa\_ d1pjva\_ d1c49a\_ d2ktca1 d1wmta\_ d1du9a\_ d1j5ja\_ d1rlga\_  
d2pjsa1 d1k11a\_ d2i7ra1 d1ecsa\_ d1xqaa1 d5cj3a1 d1npba\_ d1jifa\_  
d2p7oa\_ d1r9ca\_ d1mpya2 d1kw3b2 d1kw3b1 d4ghga1 d1tfza1 d3isqa1  
d3isqa2 d1sqia1 d1sqia2 d1lkda2 d1lkda1 d1mpya1 d1cjxa2 d1cjxa1  
d1sp9b2 d1t47a1 d1t47a2 d1f1ua2 d1sp8a1 d1sp8a2 d1f74a\_ d3l21a\_  
d2e1da\_ d1to3a1 d1w3ia\_ d1sfla\_ d1n7ka\_ d1vcva1 d4imea\_ d1wa3a\_  
d2ocza1 d1f2ja\_ d3m16a\_ d2yxga\_ d1ub3a\_ d3a5fa\_ d1fbaa\_ d1l6wa\_  
d1xfba1 d1wx0a1 d1vpxa1 d1ojxa\_ d1mxsa\_ d2a4aa1 d1xkya1 d3cq0a1  
d3s1xa\_ d1f05a\_ d1fdja\_ d3cpra1 d4d2ja\_ d1s5ja2 d1qhta2 d4dlea2  
d1tgoa2 d3py8a2 d1q8ia2 d1kfsa2 d2py5a2 d1qsta\_ d2beia1 d4m3sa\_  
d1u6ma1 d1ygha\_ d1yk3a1 d3dr6a\_ d1xmta\_ d1z4ea1 d2ge3a1 d1bo4a\_  
d2fiaa1 d2jdca1 d1y9wa1 d3to7a\_ d1wwza1 d2fl4a1 d2ozua1 d2b5ga\_  
d2cy2a1 d2p0wa\_ d1cm0a\_ d4pswa\_ d1yrea1 d1yr0a1 d1m4ia\_ d2gana1  
d1yvka1 d1ghea\_ d2g3aa1 d1y7ra1 d2euia1 d1q2ya\_ d2fsra1 d1xeba\_  
d2ae6a1 d1qsma\_ d2aj6a1 d1y9ka1 d1i12a\_ d1vkca\_ d2atra1 d1n71a\_  
d2d4pa1 d2fiwa1 d2fe7a1 d1tiqa1 d2ou2a\_ d1yx0a1 d2fcka1 d1p0ha\_  
d2j8ma\_ d2pq8a\_ d1z4ra1 d1s3za1 d1ufha\_ d1xvqa1 d1pn0a2 d3hy2a\_  
d2cvba1 d1o8xa\_ d1lu4a\_ d1we0a1 d2bmxal d2a4va1 d1psqa\_ d1xiya1  
d1q98a\_ d1n8ja\_ d1zofa1 d2ggta\_ d3tjja\_ d4je1a1 d1o73a\_ d3s9fa\_

d2zcta\_ d1qmva\_ d2b1ka\_ d5dvba1 d2b5xa1 d2v2ga\_ d1st9a\_ d3tb2a\_  
d4llra\_ d4fh8a1 d1e2ya\_ d1knga\_ d2h30a\_ d1i5ga\_ d2z9sa\_ d2f8aa1  
d1tp9a1 d2b7ka\_ d1nm3a2 d3hvva\_ d2wfca1 d4kcea\_ d1xvwa1 d4gqca1  
d3qpmma\_ d4k1fa\_ d1zzoa1 d1gp1a\_ d1prxa\_ d4od7a1 d1z6ma1 d4mcua1  
d4dvca1 d1r4wa\_ d3l9sa\_ d3rppa\_ d3kasa1 d3b1a3 d1cg2a1 d1yloa2  
d1y7ea2 d1y0ya3 d1lfwa1 d1vixa1 d1fnoa4 d1vhoa2 d1ysja1 d1vhea2  
d1z2la1 d2fvga2 d1r3na1 d2grea2 d1xmba1 g1q71.1 d1rtqa\_ d1letha2  
d1w52x1 d2ppla1 d1hpla2 d1lpbb2 d2oxea1 d1bu8a2 d1rp1a2 d1ysl\_x\_  
d4hs9a\_ d1ispa\_ d1ex9a\_ d1ku0a\_ d3qmma\_ d1ra6a\_ d3gsza\_ d1khva\_  
d1te9a\_ d2xwha\_ d3uqsa\_ d3hkwa\_ d3n6ma\_ d2cjqa\_ d2xyma\_ d1teba\_  
d1te8a\_ d1s48a\_ d1u09a1 d4wfxa\_ d3tyqa\_ d2pgga1 d2h1ia1 d2r8ba1  
d3b5ea1 d3cn9a\_ d1lgya\_ d4l3wa\_ d1gz7a\_ d1lukca\_ d4wfia\_ d4cg1a1  
d3visa\_ d3groa\_ d1pjaa\_ d1ei9a\_ d2ftba\_ d1pmpa\_ d2rcqa1 d1fdqa\_  
d4lkpa\_ d1sa8a\_ d1vyfa\_ d1lpja\_ d3vg7a1 d4azqa1 d1o8va\_ d5bvqa\_  
d1p6pa\_ d2qo4a\_ d1opba\_ d1yiva1 d1o1va\_ d4bvma1 d4tkba\_ d4i3ba\_  
d1bwya\_ d1ggla\_ d4gkca\_ d1cbia\_ d3p6da1 d1kqwa\_ d2a0aa1 d2ddfa\_  
d3zxha\_ d1cg1a\_ d1rm8a\_ d1eaka2 d1hy7a\_ d2jsda\_ d1cxva\_ d1hv5a\_  
d1i76a\_ d3p0ya1 d1igra1 d1igra2 d1n8yc2 d1m6ba2 d1m6ba1 d1jx4a2  
d3gv5b1 d1t94a2 d3bq0a2 d1h6ta2 d1h6ua2 d2tbvc\_ d1c8nc\_ d1x36a\_  
d1smvc\_ d1ng0c\_ d4sbvc\_ d1opoa\_ d1f2nc\_ d1cixa\_ d1y29a\_ d1v7fa\_  
d2jtba\_ d1d1ha\_ d1g9pa\_ d1llupa\_ d1mb6a\_ d2a2va\_ d1niya\_ d1i25a\_  
d1hvwa\_ d2mpqa\_ d1ie6a\_ d1kqha\_ d1la4a\_ d2mxoa1 d1d10a\_ d1koza\_  
d1qk6a\_ d1emxa\_ d1lqra\_ d1c6wa\_ d1rmka\_ d1ixta\_ d1eyoa\_ d1cnna\_  
d1fu3a\_ d1g1pa\_ d1f3ka\_ d1fyga\_ d1rypd\_ d1irua\_ d1rypc\_ d3unfk\_  
d1rypa\_ d1j2pa\_ d1irui\_ d1j2qh\_ d3unfh\_ d1m4ya\_ d1rypb\_ d1irug\_  
d1iru2\_ d1q5rh\_ d1rypg\_ d1g3ka\_ d1iruf\_ d1q5qa\_ d1e94a\_ d1irub\_  
d1ryph\_ d3ty6a\_ d1iruj\_ d1iruk\_ d1rype\_ d1irud\_ d1irue\_ d3mi01\_  
d1rypf\_ d1iruh\_ d2z3ba\_ d1iruc\_ d3mka2\_ d1iru1\_ d1ny721 d1ny722  
d1a6ca3 d1a6ca2 d1a6ca1 d1pgl22 d1pgl11 d1ny711 d1jgta2 d1ofda3  
d1ea0a3 d1ecfa2 d1q15a2 d1ct9a2 d1ao0a2 d1te5a\_ d1y14b1 d2nn6i1  
d1i941\_ d2zjra2 d1smxa\_ d2qamc2 d1hh2p1 d2r7da1 d1rl2a2 d1wfaq1  
d3bzka4 d1x6oa2 d3a0ja\_ d2j01d2 d2ja9a1 d4q15a\_ d1hr0w\_ d1luza\_  
d2n3sa\_ d2vnud1 d1h95a\_ d2nn6h1 d1ne3a\_ d2mola\_ d1iz6a2 d1jjga\_  
d1e3pa2 d2ix0a3 d2ix0a2 d2lxja\_ d1ueba3 d1ueba2 d2z0sa1 d1u0la1  
d2ix0a1 d2eifa2 d2je6i1 d3i2za1 d2c35b1 d2ahob2 d1t9ha1 d3i4oa\_  
d2qall1 d1jt8a\_ d2nn6g1 d1g6pa\_ d3cama\_ d1i94q\_ d1c9oa\_ d1d7qa\_  
d2ba0a1 d2vnud2 d2vnud3 d1khia2 d2qalq1 d1wi5a1 d1xtda2 d1ny4a\_  
d1eixa\_ d3exra\_ d2ffca1 d2fdsa1 d3n3ma1 d2czda\_ d1q6oa\_ d2yyua\_  
d1vqta1 d3ldva1 d1prtc2 d2r80b\_ d1cqxa1 d1gcvb\_ d3boma\_ d2h8fb\_  
d2raoa\_ d3bj1a\_ d4hrrb\_ d2r50a\_ d3d1kb\_ d2aa1b1 d3zhwa\_ d3hf4b\_  
d3gdja\_ d1jebb\_ d3bj1b\_ d1x9fb\_ d1wmub\_ d1gcva\_ d3bcqb\_ d3d4xb\_  
d1gvha1 d2dc3a\_ d3hf4a\_ d4yu3a\_ d3k8ba\_ d1qpwb\_ d2r80a\_ d3bcqa\_  
d1v4wa\_ d3wtgb\_ d1j17a\_ d4esaa\_ d1a9we\_ d3d1ab\_ d1fsla\_ d4h2la\_  
d1v4wb\_ d1mwca\_ d1vhba\_ d1jeba\_ d1spgb\_ d1h97a\_ d1q1fa\_ d1tu9a1

d3d1aa\_ d1hdsb\_ d3hyub\_ d2zfbb\_ d3fs4a\_ d1oj6a\_ d1shrb\_ d4h21b\_  
d4yu3b\_ d1spga\_ d3hrwa\_ d3qqra\_ d3at5a\_ d4wchd\_ d3hyua\_ d1cg5b\_  
d1uc3a\_ d1hbra\_ d2raob\_ d1outb\_ d4esab\_ d3gdjb\_ d3qqqa\_ d1x9fc\_  
d3vrfa\_ d1litha\_ d3mkba\_ d3d4xa\_ d3mjpa\_ d1jl6a\_ d3fh9a\_ d1outa\_  
d2dc3b\_ d1lit2a\_ d3eoka\_ d3g46a\_ d1qpwa\_ d3vrfb\_ d1ch4a\_ d1x9fd\_  
d1hdsa\_ d2zfba\_ d3mkbb\_ d1or4a\_ d3wtga\_ d1a4fa\_ d3fh9b\_ d3bomb\_  
d3cy5a\_ d3at5b\_ d1x9fa\_ d2oifa\_ d4lmbx\_ d1cpcb\_ d3v57a\_ d1kn1a\_  
d1cpca\_ d4f0ta\_ d2vjha\_ d4po5b\_ d1eyxa\_ d1alla\_ d4f0tb\_ d1b33b\_  
d1b8db\_ d4h0mb\_ d1b33a\_ d2vjhb\_ d4l6b\_ d2vmlb\_ d1allb\_ d2vjta\_  
d3dbja\_ d2vmla\_ d2vjtb\_ d4f0ub\_ d1f99b\_ d4rmpa1 d1liaa\_ d1eyxb\_  
d2uulb\_ d4lmsb\_ d4f0ua\_ d2bv8a\_ d1f99a\_ d2bv8b\_ d2c71b\_ d3dbjb\_  
d4rmpb1 d1b8da\_ d4h0ma\_ d3v57b\_ d1kn1b\_ d1liab\_ d2uula\_ d2j96a\_  
g1wht.1 d2xqfa\_ d1ea5a\_ d1f6wa\_ d1dx4a\_ d1qe3a\_ d1k4ya\_ d4qwwa\_  
d2ha2a\_ d3c8da2 d2pbla1 d1jjia\_ d1lzlzla\_ d1jjfa\_ d2h0ba\_ d2erfa\_  
d1h30a2 d1h30a1 d3mw4a1 d1pz7a\_ d2r1ba\_ d3v64a1 d1d2sa\_ d3bopa1  
d3mw3a1 d1okqa1 d1b9ra\_ d1offa\_ d1frra\_ d3wcqa\_ d1l5pa\_ d1wria\_  
d1i7ha\_ d3av8a\_ d1czpa\_ d1rfka\_ d3p1ma1 d3b2ga\_ d2bt6a2 d4iuaa3  
d4bvva\_ d5hpga\_ d3k65a\_ d1ki0a3 d1ki0a2 d1ki0a1 d1a0ha1 d1pmla\_  
d3sp8a3 d2feba1 d2m5ta\_ d1cqqa\_ d1wqsa\_ d5bpea\_ d2ipha\_ d1lvoa\_  
d2bhga1 d3tnta\_ d3sjia\_ d3d23a1 d2fyqa\_ d3tloa\_ d3zvea1 d2hrva\_  
d3q3ya1 d4asha1 d1e88a1 d1l6ja5 d1l6ja4 d1eaka4 d1eaka3 d1l6ja3  
d1h8pa2 d3rp2a\_ g1lucy.1 d1fuja\_ d2zchp\_ d3w94a\_ d1si5h\_ d1lo6a\_  
g2pka.1 d1cgha\_ d1kigh\_ d1a5ia\_ d3s9ba\_ d1hj8a\_ d1ao5a\_ d2anya\_  
d1q3xa1 d1gvza\_ d1azza\_ d4gsoa\_ d2f91a1 d1iaua\_ d1gdna\_ d1eufa\_  
g1fiw.1 d1eq9a\_ d4nfea\_ d2rdla\_ d1spja\_ d1elva1 d1a7sa\_ d1ekbb\_  
d1pfxc\_ d1yc0a\_ d2aiqa\_ g1fiz.1 d1fi8a\_ d4k60a\_ d4dgja\_ d1mzaa\_  
d1op0a\_ d3tjva\_ d1pytd\_ d1sgfg\_ g1gg6.1 d2eeka\_ g1rtf.1 d1a0ja\_  
d3g01a\_ d1pytc\_ d4e7na\_ d1ddja\_ d1z8ga1 d1npma\_ d1brup\_ g1jou.1  
d1sgfa\_ d1autc\_ g2hnt.1 g1kdq.1 d1orfa\_ d3s69a\_ d4crga\_ d1fxya\_  
d1bqya\_ d1svpa\_ d1mbma\_ d3su6a1 d1cula1 d4agka\_ d1vcpa\_ d1q31a\_  
g1n11.1 d3e90b\_ d3u1jb\_ d1dzka\_ d4tlja\_ d2a2ua\_ d4wfvva\_ d3t1da\_  
d4iaxa\_ d3zq3a\_ d2nnda\_ d1i4ua\_ d1kxoa\_ d1bbpa\_ d1kt7a\_ d1lexsa\_  
d3s26a1 d1lf7a\_ d1qfta\_ d4gh7a\_ d1z24a1 d1qabe\_ d1xkia\_ d1lew3a\_  
d3bx7a\_ d4iawa1 d1n0sa\_ d1gkab\_ d3kzaa\_ d2k23a\_ d2l9ca1 d2joza1  
d1gm6a\_ d3kffa\_ d3saoa1 d1e5pa\_ d1yupa1 d1iiua\_ d3lgia\_ d3i77a\_  
d2z9ia2 d4nsva\_ d1lcya2 d4jcna\_ d1agja\_ d1os8a\_ d1hpga\_ d1l1ja\_  
d1qtfa\_ d1e69a\_ d1mv5a\_ d3g60a4 g1ii8.1 d1ewqa2 d1ji0a\_ d1qhla\_  
d1v43a3 d2wmfa1 d1vpla\_ d1g2912 d4a82a2 g1f2t.1 d2d62a1 d3tuic1  
d2bbsa1 d3g60a3 d2ixea\_ d1g6ha\_ d1sgwa1 d2qi9c\_ d3rlfa1 d3b60a1  
d3d31a2 d2pzea1 g1xew.1 d1jj7a\_ d1oxxk2 d2onka1 d1wlwa\_ d1iwea\_  
d1qf5a\_ d1vmaa2 d1np6a\_ d2p67a1 d3ihla\_ d1okkd2 d1l1s1a2 d1s1ma2  
d1iona\_ d2v40a\_ d1dj3a\_ d3hida\_ d2vo1a1 d2g0ta1 d1vcoa2 d1j8mf2  
d1g3qa\_ d1xjca\_ d1p9ba\_ d1qzxa3 d1ihua2 d1ihua1 d2qm8a\_ d1dj2a\_  
d4ioja\_ d1cp2a\_ d1yrba2 d1hyqa\_ d3gqba2 d1skye3 d1xp8a1 d1tf7a2

d1tf7a1 d1ye8a1 d1skyb3 d2qe7d2 d4blta\_ d4huta\_ d3ltaa2 d4hyya\_  
d2i3ba1 d1crla\_ d3j9tb2 d3ntua2 d1vdza1 d2z43a\_ d1e9ra\_ d1nlfa\_  
d3ziaa2 d1n0wa\_ d1g6oa\_ d3ziad2 d3j9ta2 d1pzna2 d3gqbb2 d2i49a\_  
d1nnfa\_ d1xvxa\_ d1ursa\_ d1h3da1 d1iuda\_ d4m1va1 d1twya\_ d3e13x\_  
d2nxoa1 d4pfua\_ d3ttma\_ d1elja\_ d2qmwa1 d1us5a\_ d1y3na1 d1jeta\_  
d1uqwa\_ d4f19a1 d2esna2 d3thia\_ d3fasa1 d2uyeb\_ d2xwva1 d1r9la\_  
d2fyia1 d1pb7a\_ d2ozza1 d1sw5a\_ d1vr5a1 d2g29a\_ d1xs5a\_ d3lswa\_  
d2z23a\_ d3w9va\_ d3tcha\_ d1q35a\_ d1z7me1 d3q27a\_ d1p99a\_ d1ve4a1  
d2i6ea1 d4mcoa1 d4n8ya\_ d1eu8a\_ d1zbma1 d1hsla\_ d1ixca2 d1j1na\_  
d1xvya\_ d1y9ua\_ d2z22a1 d1xoca1 d4oera\_ d1wdna\_ d5f1qa1 d1xt8a1  
d1i6aa\_ d4gwoa\_ d4igta1 d1pc3a\_ d4mmpa1 d1o63a\_ d2czla1 d2onsa2  
d4mija1 d1eh3a\_ d3skpa\_ d1dtza1 d1dtza2 d1ieja\_ d1jnfa2 d1jnfa1  
d1b1xa2 d1b1xa1 d1jw1a1 d1jw1a2 d1ryoa\_ d1h76a1 d1h76a2 d1c4oa1  
d2p6ra3 d2p6ra4 d1oywa2 d1oywa3 d1wrba1 d1w36b2 d1w36b1 d1c4oa2  
d3bora\_ d1t6na\_ d2eyqa5 d2eyqa3 d2eyqa2 d2zu6a2 d1veca\_ d1w36d1  
d2g9na1 d1z3ix2 d2rb4a\_ d1hv8a1 d1hv8a2 d1t5ia\_ d1w36c2 d2j0sa2  
d2j0sa1 d1fuka\_ d3hjha1 d1z5za1 d1qdea\_ d1z63a1 d1s2ma2 d1s2ma1  
d1wp9a1 d1wp9a2 d1gm5a3 d1gm5a4 d3dina4 d3dina3 d1q0ua\_ d1w36c1  
d1z3ix1 d1nkta3 d1nkta4 d1uaaa2 d1w36d2 g1qhh.1 d2fwra2 d2fwra1  
d3q3ma\_ d1za0a1 d1mxra\_ d2inca\_ d1jk0a\_ d2incb\_ d1mhyb\_ d3hf1b\_  
d1r2fa\_ d2uw1a\_ d1mhyd\_ d3n37a\_ d1afra\_ d1oquc\_ d1syya\_ d1mtyd\_  
d2olza\_ d1uzra\_ d1smsa\_ d2fkza\_ d1zujal d1s3qa1 d2fjca1 d1z6om1  
d1veia\_ d4dyya\_ d1jiga\_ d3gvya\_ d2pyba\_ d4cy9a1 d3bvfa1 d1r03a\_  
d2cf7a\_ d1zs3a1 d4iwka\_ d3ka8a\_ d3np0x\_ d1n1qa\_ d1lb3a\_ d4e6ka\_  
d1z6oa1 d2fzfa1 d4dyua\_ d3ge4a\_ d1jgca\_ d4am4a\_ d2z6ma\_ d1ji5a\_  
d1vlga\_ d1lkoa1 d1krqa\_ d3qz3a\_ d1o9ra\_ d2ffxj\_ d1euma\_ d1yv1a1  
d2v2pa\_ d1j30a\_ d4di0a\_ d1dpsa\_ d2cbia2 d2choa2 d1l8na1 d1oewa\_  
d2qzxa\_ d2asia\_ d1psoe\_ d1smra\_ d2h6ta\_ d1pfza\_ d1lizda\_ d3hd8a\_  
d1j71a\_ d1dpja\_ d4aa9a\_ d1t6ex\_ g1b5f.1 g1l1ya.1 g1htr.1 d1qdma2  
d1bxoa\_ d1wkra\_ d1tzsa\_ d1libqa\_ d2qzwa\_ d1ebfa2 d1bdqa\_ d3ggta\_  
d3ixoa\_ d1mrxa\_ d2haha\_ d1tw7a\_ d4njsa\_ d1sgua\_ d2p3da\_ d1nsoa\_  
d3d3ta\_ d2rkfa\_ d1c6ya\_ d2rspa\_ d3ogpa\_ d3ekwa\_ d2o4na\_ d2j9ja\_  
d1baia\_ d3ggua\_ d3lzua\_ d4npua\_ d4j55a\_ d2r8na\_ d2fxda\_ d2p3ca\_  
d4dqea\_ d3ttpa\_ d3t3ca\_ d2p3aa\_ d2hc0a\_ d2fdda\_ d3mwsa\_ d1h4ra3  
d4yl8a1 d2a16a3 d1l17ya\_ d1wgda1 d1wggal d4q5eb\_ d1wjna1 d1se9a\_  
d3n3kb\_ d1wz0a1 d1we6a1 d2m0xa\_ d2gbka\_ d3rt3b1 d1wh3a1 d1sifa\_  
d2ekec2 d4ii2b1 d4hk2a1 d1c3ta\_ d1m94a\_ d1wgha1 d1ttna1 d1j8ca\_  
d1wx8a1 d3v6cb1 d2ma9b\_ d4i6lb1 d1bt0a\_ d2jvca1 d1iyfa\_ d2k1fa\_  
d1wxva1 d1wf9a1 d1t0ya\_ d2io0b2 d1x1ma1 d2gbma\_ d1zw7a1 d2m17a\_  
d1ud7a\_ d1we7a1 d2lwpal d2gbja\_ d1wjua1 d1v6ea1 d1v86a1 d4eewa\_  
d1wiaa1 d4icva\_ d4gu2a\_ d1wx7a1 d1wy8a1 d4hjka1 d2faza1 d1v5oa1  
d3ruib\_ d1eo6a\_ d3waob\_ d2r2qa1 d3m95a\_ d3wana\_ d2a13a1 d2cr5a1  
d1wj4a1 d4lu0a\_ d1of8a\_ d3unda1 d3e9aa1 d1vr6a2 d1n8fa\_ d2qkfa\_  
d1d9ea\_ d1s5ja1 d2hbja2 d2igia\_ d1wlja\_ d1qhta1 d4dlea1 d1tgoal

d2f96a1 d3tr8a1 d3mxma\_ dlq8ia1 dly97a1 dlw0ha\_ dlkfsa1 d2py5a1  
d1noya\_ d1d5aa1 d1yt3a3 d2guia\_ d3mwpal d4kbla\_ gly43.1 dlum8a\_  
d1qvra2 d1qvra3 d1qzma\_ d1sxjc2 d1jr3d2 d2p65a\_ d1l8qa2 d1g8pa\_  
d3hu3a3 d1sxjd2 d1njfa\_ d1in4a2 d1sxja2 d1tuea1 d2ce7a2 d1w5sa2  
d1sxjb2 d1d2na\_ d1ny5a2 d1ofha\_ d2gnoa2 d2a5yb3 d1fnna2 d1u0ja1  
d1lv7a\_ d1iqpa2 d2fnaa2 d1ixsb2 d4gita\_ d1sxje2 d1g41a\_ d2lj7a\_  
d1n4na\_ d2m8bb1 d2kyqa\_ d3psma\_ d1jxca\_ d2glla\_ d1ugla\_ d4uj0a\_  
d1js9c\_ d1f15b\_ d1za7a\_ d1laja\_ d1t0za\_ d2i61a\_ d1t1ta\_ d1sn4a\_  
d1kv0a\_ d2lkba\_ d1npia\_ d1wwna\_ d1pe4a\_ d2kbka\_ d2li7a\_ d1djta\_  
d2kbha\_ d1dq7a\_ d1sega\_ d1omya\_ d1zywa1 d1jzaa\_ d1t61c1 d1iyjb4  
d1iyjb5 d1iyjb3 d1o7ia\_ d4ipca1 d1x3ea\_ d4apva\_ d1jb7a1 d1jb7a2  
d1jb7a3 d3kdfa\_ d1uelb\_ d1wjja1 d3eiva\_ d1xjva2 d1xjva1 d2ccza2  
d1se8a\_ d1l1oc\_ d1jb7b\_ d1qvca\_ d3ulla\_ d1qzga\_ d1miua4 d1miua5  
d1miua3 d3g48a1 d1gd7a\_ d1jjcb3 d1pyba\_ d3ubub\_ d1legia\_ d1qo3c\_  
d1v7pa\_ d1tdqb\_ d3ubua\_ d1c3ab\_ d1h8ua\_ d3bx4b\_ d1t8ca1 d1sb2a1  
d1qdda\_ d2ziba1 d3cada\_ d1byfa\_ d1j34b\_ d1jwia\_ d1jzna\_ d1c3aa\_  
d1wmza\_ d3bdwb\_ d1hq8a\_ d1fifa1 d1dv8a\_ d3hupa\_ d1wk1a1 d1umra\_  
d2afpa\_ d3bx4a\_ d1gz2a\_ d1sl6a\_ d1v7pb\_ d3g8ka\_ d1lixa\_ d1j34a\_  
d1jwib\_ d1g1sa1 d1y17a1 d1ja3a\_ d1fvub\_ d3bdwa\_ d1sb2b1 d1fvua\_  
d1umrc\_ d1oz7a\_ d4m17a\_ d3cfwa1 d1ypqa1 d1g1ta1 d3fd4a\_ d3l9jc\_  
d4dn8a1 d1v4lb\_ d1rdl1\_ d2msba\_ d1dgsa2 d1fvia1 d1ckma1 d1x9na2  
d1xwdc1 d3kj4a\_ d1w8aa\_ d2ifga3 d1p9ag\_ d1xkua\_ d1rpma\_ d2shpa1  
d1yfoa\_ d1l8ka\_ d2ooqa1 d1g4us2 d1p15a\_ d1lara2 d1lara1 d1wcha\_  
d2fh7a2 d2fh7a1 d1ohea1 d1ohea2 d2f4da\_ d1rxda\_ d2hxpa\_ d1xria\_  
d1d5ra2 d3ezza\_ d4y2ea\_ d1i9sa\_ d3azya\_ d3wvja\_ d1upsa1 d1ajoa\_  
d2hyka\_ d1ajka\_ d2vy0a\_ d1o4ya\_ d3o5sa\_ d3d6ea\_ d3atga\_ d1dypa\_  
d1umza\_ d3i4ia\_ g1qmo.1 g1len.1 d3zyra\_ d1fnya\_ d1n47a\_ g2ltn.1  
d1avba\_ d3usua\_ d1dhkb\_ d1f9ka\_ d1ukga\_ d1g8wa\_ d1g9fa\_ d1wbfa\_  
d3wcsa\_ d1g7ya\_ g1loe.1 d1mvqa\_ d1hq1a\_ d1v6ia\_ d1dbna\_ d1qnwa\_  
d1fx5a\_ d4l8qa\_ d1ioaa\_ d3n35a\_ d1epwa1 d3h33a\_ d1rwja\_ d19hca\_  
d1os6a\_ d3bxua\_ d3h4na\_ d1i77a\_ d3caoa\_ d1j0pa\_ d2ctha\_ d1duwa\_  
d1ofwa\_ d2e84a\_ d1hh5a\_ d1gyoa\_ d3h34a\_ d1wioa4 d1ccza2 d1vcaa1  
d1dr9a2 d1ic1a1 d2d9qb1 d2nxyb2 d1adqa1 d1fnga1 d1uvqb1 d1zs8a1  
d2vola1 d2vola2 d1mfb12 d2jelh2 d1uwel2 d3qq4b1 d1kjvb\_ d1k5na1  
d1osph2 d4odhl2 d1ow0a1 d1ow0a2 d1bfob2 d3l9ra2 d3jttth1 d2fath2  
d4elkb2 d1fn4b2 d2xfxb\_ d1pg7x2 d1cqka\_ d4k71b2 d1lk2a1 d1eapb2  
d4lfhg2 d1i4fa1 d2nw2a2 d1kfah2 d1mhca1 d1h3ua1 d1wejh2 d1h0db2  
d1a5fh2 d1kcvh2 d1mjuh2 d1qqda1 d1kcrh2 d1k8ia1 d3huja2 d2nnab1  
d1nfd2 d3mffb2 d1s9va1 d1lk3h2 d1q0xl2 d1fv1b1 d1neza1 d4rfeb2  
d1r3ha1 d1a6tb2 d1kjva1 d1pz5b2 d1onqa1 d2bc4a2 d1de4a1 d1k8da1  
d1tcra2 d1dn0b2 d1nfd2 d2xwtb2 d1bfoa2 d1mexh2 d1iakb1 d1ypzf2  
d4f7ea2 d1q72l2 d2fbjh2 d1fe8h2 d1clzh2 d1fngb1 d1uvqa1 d1vgka1  
d1c16a1 d4j12a2 d4x99b2 d1igtb3 d1je6a1 d1q72h2 d1nldh2 d1teth2  
d2hmic2 d1ilca2 d1ilca1 d1k8ib1 d1q0yh2 d1kfa12 d3frua1 d1pg7w2

d1u58a1 d1igyb4 d1igyb3 d1hyrc1 d1klub1 d1deeb2 d1c12b2 d2bc4b2  
d2ig2h2 d1kcvl2 d3wn5b1 d1lk2b\_ d1lk3l2 d1mjul2 d1sm3h2 d1q0xh2  
d1zvsal d1ydpal d1u8ib2 d1ypze2 d1kcu2 d1op9a\_ d1y0la1 d1etzb1  
d1legj11 d2gsib1 d1nj9a1 d4jfhdl d1aqkl1 d1t2ja\_ d1lo4h1 d1zvya1  
d3v4vl1 d4enec1 d1kxtb\_ d5e8ea1 d2pxya\_ d4weud\_ d1xiwc\_ d2esvd1  
d1qznh\_ d1ogae1 d1f4xh1 d4n1hb\_ d3ezjb1 d3mlw11 d1kfah1 d1etza1  
d1b4jh1 d3cfic\_ d4w68a\_ d2arja1 d1ek3a\_ d2ok0l1 d1vera\_ d1uwgh1  
d1blnb1 d1fpth1 d1rzga1 d2giya1 d4m3kb1 d1nc2a1 d2nyyd1 d1ncna\_  
d1fbih1 d5dxwa\_ d4fqqa1 d1dqdh1 d1jfq11 d1kelh1 d1faih1 d1frgl1  
d1fig11 d4m6n11 d1fo0a\_ d4hxb11 d3b5ga\_ d3quyd1 d2h9gb1 d1i8kb\_  
d2dd8h1 d2ck0h1 d1eaja\_ d4w6wb1 d2a6ib3 d1t66d1 d2e27h\_ d1ob1b1  
d1f11b1 d2v7na1 d1ad0a1 d2xt1b1 d1pskh1 d4i13b1 d2op4l1 d1a0ql1  
d1uwell d1za3a1 d1ncbl1 d4uu9a\_ d1bm3h1 d1cloh1 d1nqba2 d1cf8h1  
d4y5va\_ d1mhph1 d5anma1 d4cdgc1 d4ldeb\_ d1y0lb1 d2pcpb1 d1z3gl1  
d1dfb11 d1fh5h1 d3g5xa1 d1tzib1 d4dn3l1 d3zhka1 d2b1hh1 d2uyla1  
d1f3dh1 d1nj9b1 d2agjh1 d2h1pl1 d1q72h1 d8fabb1 d1ndmb1 d1rjca1  
d4u6hb1 d3upca\_ d2fbj11 d1osph1 d1tvda\_ d2cjh\_ d4fhbd1 d1bd2d1  
d1rz7h1 d3nn8a\_ d1blna1 d1knoa1 d1nfda1 d2bmkb1 d1dq11\_ d1igyb1  
d1igf11 d12e8h1 d3utza1 d1nc2b1 d1rihh1 d4mwfb1 d4jvpa1 d1mieh1  
d1rhfa1 d1fgn11 d1sbsh1 d1lp9e1 d1dn0a1 d4lqf11 d1iaih1 d1kgcd1  
d1mh5b1 d1gpol1 d2g60h3 d1f8t11 d2jixd1 d4grwh\_ d1fo0b\_ d1bfob1  
d1axsa1 d1u9ka\_ d1nmbh\_ d1h8na1 d1h8na2 d1jguh1 d4eura1 d3sdy11  
d35c8h1 d1w72l1 d1mvub\_ d1i9rh1 d1ob1a1 d4wenb\_ d1yeeh1 d3ietc1  
d1f58h1 d1ad0b1 d1mqkl\_ d1nbvh1 d4b50a\_ d3r8bb\_ d1baf11 d1mamh1  
d4rgne1 d2gsgb\_ d35c8l1 d1bafh1 d1ai1h1 d2pcpa1 d2fath1 d2x1pa\_  
d1orsb1 d1libg11 d1shma\_ d1a2yb\_ d1u0qa\_ d2coqa\_ d1hilb1 d1qfwi\_  
d1jv5b\_ d1fn4b1 d5e0qa\_ d1nsnh1 d1plg11 d4ocx11 d1kb5h1 d1rzfh1  
d1pg7x1 d2fx7h1 d2oi9c\_ d1l7il1 d3eyva1 d1d5il1 d4ffyl\_ d1tet11  
d1a6wh\_ d1ac6a\_ d3dvfa\_ d1nfde1 d1mimh1 d1ri8a1 d1jhlh\_ d3dura\_  
d1fskb1 d1f97a1 d3so3b1 d2ak4d1 d1lp9f1 d4z7wf1 d1l7th1 d4y5ya\_  
d4x7ec1 d1emth1 d1ikf11 d1nlbh1 d4utal1 d1bjma1 d1eapb1 d1u6ah1  
d2dtgd1 d1kj2b\_ d1xeda1 d1cleh1 d1fgvh\_ d2bnub1 d2fb4h1 d2dtgb1  
d1ktrh\_ d1jpth1 d1qkz11 d4hepg\_ d2atpb1 d1flrh1 d2hrpl1 d1mvfa\_  
d1iaim1 d3k80a1 d2jb5h1 d3zkxc\_ d4grwe\_ d1it9h1 d1rhhb1 d3w9ec\_  
d1e4wh1 d1sy6h1 d2j6eh1 d3qxta\_ d1jglh1 d1p7ka1 d1tzhb1 d4n8pa1  
d1gaf11 d2jelh1 d1wioa2 d4i0cc1 d1cicb1 d1lmka2 d1lmka1 d1iqwh1  
d1orqb1 d1ejoh1 d1jnlh1 d4zg1a\_ d43c9b\_ d1ggb11 d1wejh1 d3q6fa1  
d1f3dj1 d3c6la1 d1bqlh1 d3p9wb\_ d1a3r11 d1h0db1 d2uzil\_ d1eo8l1  
d1qfwl\_ d1n7ml1 d1igja1 d1c5ch1 d2a9mh\_ d1rmfh1 d1fjlb1 d4heme\_  
d1ccza1 d1a5fh1 d1ogad1 d1dlfh\_ d1qa9b\_ d1vge11 d3qskb\_ d1sjxa\_  
d4ozfg1 d1sq2n\_ d1qd0a\_ d1kcvh1 d1c5db1 d3qcull1 d8faba1 d3bn9d1  
d1mjuh1 d4y8dc\_ d7fabh1 d3dvgb1 d1lo0l1 d1a6tb1 d1gigh1 d1kcrh1  
d2hwz11 d1yjdc1 d3clfl1 d4krna\_ d1dl7l\_ d1e6ol1 d1mexh1 d3r0ma\_  
d4kkna\_ d1fns11 d1oaqh\_ d1rzia1 d1lucb1 d1ncw11 d4b41a\_ d1nfdfl

d2mpah1 d2d7t11 d4grwf\_ d4b5ea\_ d1lk3h1 d3u79a\_ d4u3xa\_ d1ghf11  
d1bvkb\_ d1mcww1 d1b88a\_ d1jrhh1 d32c2b1 d4wemb\_ d1dsfh\_ d1op3h1  
d1ce111 d1iqda1 d1qoka1 d1qoka2 d1qfuh1 d2crya1 d1ay1h1 d1oaql\_  
d3ab0b\_ d1rur11 d1t4kb1 d1bz7b1 d1n0xh1 d1for11 d1ucb11 d4w6yb\_  
d43c9a\_ d2aab11 d1tzia1 d4n1ca\_ d1k6qh1 d3g9ab\_ d4tvsa1 d1igmh\_  
d1pz5b1 d3dx9a1 d3wxwh\_ d1nakh1 d1kcul1 d3eaka\_ d4qlra1 d1cr911  
d1d9ka\_ d1f4x11 d1deea1 d2i27n2 d1c12a1 d2orb11 d1j8hd1 d1mcp11  
d1c5da1 d1kenh1 d1bd2e1 d1h5ba\_ d4x7fc1 d3upaa\_ d1t3fa1 d1indh1  
d2dtgc1 d4hc111 d1zv5a1 d4wgvb\_ d1uwg11 d4f37k1 d1aqkh1 d1vesa\_  
d3zkqd\_ d1fpt11 d1l0411 d1knob1 d3rrqa\_ d1ct8b1 d4orz\_ d1mlbb1  
d4hgkc1 d1dqdl1 d1bogb1 d4ozhe1 d1dr9a1 d1i7za1 d1dn0b1 d1kell1  
d1rzi11 d1ypzf1 d1wtla\_ d1hkfa\_ d1fail1 d1figh1 d2vyre\_ d1sjva\_  
d1ohqa\_ d1bfoa1 d1pkqb1 d1mjul1 d1b4j11 d1nsn11 d2arjb1 d1p4bh\_  
d4aj0a\_ d3nn8b\_ d2rcja1 d1f2xk\_ d4v1dd\_ d1adqh1 d2eksa\_ d4k3ga\_  
d1jfqh1 d1uweh1 d1frgh1 d4gftb\_ d1uz8b1 d4n1ea\_ d1bm311 d1clo11  
d3mcka1 d2vq1a1 d1ae6h1 d4aq1b1 d1uj3b1 d1nbqa1 d1fh511 d2ck011  
d2ywza\_ d1q7211 d4nbxb\_ d1hila1 d4hzb11 d2j8811 d1zmya1 d1cd0a\_  
d1a4ka1 d1psk11 d1a0qh1 d4krmb\_ d1ncbh1 d2fbjh1 d1j8he1 d1i3ua\_  
d1cf811 d1fe8h1 d2p1ya1 d1eeqa\_ d2x89a\_ d1o10a\_ d2r01h1 d1ub5a1  
d1dfbh1 d3eyvb1 d4jdvb1 d4p2cg\_ d2gsia1 d2agj11 d1u3ha1 d2h1ph1  
d1rih11 d1fskc1 d1boga1 d2a7711 d1osp11 d1qfoa\_ d3dwta\_ d2fx711  
d1rz711 d3stba1 d1pkqa1 d1b6da1 d1dzba2 d1dzba1 d1kj2a\_ d411ha\_  
d1rzb11 d1dq1h\_ d12e811 d1mie11 d1jmaa\_ d1sbs11 d1fgnh1 d1f5811  
d1mqkh\_ d1ndgb1 d3qeg11 d1ia111 d2aw2a1 d1tqbc1 d3fo2a1 d4dkaa\_  
d1f8th1 d2g6011 d2ywy\_ d1uj3a1 d1yc7a\_ d3bd3a\_ d4w6xb1 d1nmb1\_  
d1i8ka\_ d1rj1b1 d1ypze1 d1p7kb1 d1kxqe\_ d1gpoh1 d2z4qa1 d1w72h1  
d1i9r11 d4qgya1 d4xt1c\_ d2qqnh1 d1cica1 d3c08h1 d2cd0a\_ d2bdnh1  
d1hnga1 d1mam11 d1nldh1 d1cr9h1 d4lcih1 d3bkyh1 d3qg711 d1ai111  
d1kxvc\_ d4iosd\_ d1l7ih1 d2x1qa\_ d1ub6b1 d3k74b\_ d1ibgh1 d1teth1  
d1igya1 d1hxma1 d2x6ma\_ d2e71a\_ d5e03a\_ d1qfwm\_ d2r0kh1 d1igjb1  
d1rurh1 d1plgh1 d1mj8h1 d1yuhb1 d3fmg11 d1rzf11 d1emt11 d1ad9b1  
d1igtb1 d1nlb11 d1d5ih1 d3k7ua\_ d4ffyh\_ d1bwwa\_ d3dvga1 d1a6ta1  
d1fgv1\_ d4qxgl1 d1mim11 d1jhl1\_ d2hffb1 d2hh011 d1qkzh1 d1l7t11  
d1afvh1 d1iaii1 d2cjuh\_ d1um5h1 d2ghwb2 d2ghwb1 d1kgce1 d2fgwh1  
d1ikfh1 d1dvfd\_ d2i24n1 d2xtjb\_ d1za3b1 d2yc1a\_ d2hh0h1 d2x1oa\_  
d1bvka\_ d1rj1a1 d5e7ba1 d1igta1 d1i11b1 d2fb411 d1mvua\_ d1jpt11  
d32c2a1 d1fvca\_ d1iqdb1 d2hrph1 d2p4ab\_ d4qo1a\_ d1p2cb1 d1wt5c\_  
d1t4ka1 d5c1mb\_ d1it911 d1bz7a1 d1b2wh1 d1e4w11 d1jnl11 d1yedb1  
d1za6b1 d3u7aa\_ d1igfh1 d3gnm11 d1orsa1 d1wejl1 d1a2ya\_ d1hxmb1  
d1gafh1 d2j4wh1 d1pz5a1 d1j05a\_ d1a3rh1 d4fq111 d1qfwh\_ d1eo8h1  
d1n7mh1 d4s11a\_ d1kegh1 d5da4a\_ d1iqw11 d3whxb1 d1vgeh1 d1deeb1  
d1c12b1 d1t2q11 d1ad9a1 d3gsnb1 d3b2uc1 d1ggbh1 d1t3fb1 d1nak11  
d4ocmc\_ d1lila1 d2v7hb3 d2esve1 d1mcoh1 d2qr0b1 d2q3aa\_ d1ct8a1  
d1kcr11 d2pxyb\_ d2uzih\_ d5c3ld\_ d3durb\_ d2ak4e1 d1dl7h\_ d1xiwd\_

d1mlba1 d1rmfl1 d1i7zb1 d1dlfl\_ d2xa3a\_ d5bq7b1 d1dqqb1 d3h42l1  
d1egjh1 d1kcvl1 d1fe8l1 d2j6e11 d1f3rb2 d1lk3l1 d1sm3h1 d1q0xh1  
d1ghfh1 d7fabl1 d1igch1 d1lo0h1 d4idla\_ d5c2b1\_ d1jrh11 d1il1a1  
d3zhda1 d4kfzc\_ d1b0wa\_ d1e6oh1 d1mexl1 d4krpb\_ d1fnsh1 d1ncwh1  
d4hgma\_ d4eigb1 d4rzca\_ d2mpal1 d4y5xa\_ d5en2b1 d3lrga1 d4ej1c1  
d1rhha1 d1j05b\_ d1forh1 d1q9wb1 d2wzpd\_ d2aq2a1 d1h0da1 d3revb1  
d2ij0c1 d1tzha1 d4m7j11 d1k6q11 d3b9kc1 d1igml\_ d3geua1 d1dsfl\_  
d1ce1h1 d1kcu11 d1zvha1 d1zvoa1 d1tqbb1 d1ay1l1 d2qsc11 d2cgrh1  
d1n10h1 d1ken11 d3eo0a1 d4n9ob1 d1n0x11 d3k1kc\_ d1prtc1 d2wv6d\_  
d1prt1\_ d1l1trd\_ d4l63b1 d1r4pb\_ d1prtd\_ d1tl0f\_ d2bosa\_ d1prtb1  
d3chbd\_ d2aq2b1 d1ck1a1 d1enfa1 d1i4pa1 d1v1oa1 d1et9a1 d1esfa1  
d2g9hd1 d4ohja1 d1klud1 d1bxta1 d1eu3a1 d1ty0a1 d1fnua1 d2cqva1  
d1fhga\_ d2k1ma\_ d1biha3 d1biha1 d1biha4 d3qp3a1 d1g1ca\_ d1gxea\_  
d1cvsc2 d1cvsc1 d1xmwa2 d1m4ka2 d2otpa2 d1biha2 d1rhfa2 d2fcba2  
d2fcba1 d1wwbx\_ d1gsma2 d1epfa1 d1epfa2 d2dava1 d1waaa\_ d1f97a2  
d1x44a1 d1vcaa2 d1fnla2 d1fnla1 d3b5ha2 d3h8na2 d3h8na1 d1bjba1  
d1bjba2 d1pd6a\_ d1f2qa2 d1f2qa1 d3cx2a\_ d1nbqa2 d3b5ha1 d1n26a1  
d1xiwb\_ d1xaua\_ d1fltx\_ d2ifga1 d1olla1 d1olla2 d1cs6a4 d1cs6a3  
d1cs6a2 d1cs6a1 d2gw5a2 d1sy6a1 d1xiwa\_ d1ucta2 d1ucta1 d1ry7b2  
d1gl4b\_ d1qz1a3 d1olza1 d2c9aa1 d1lwca\_

**Family-100 (g.39.1.3)**

**Positive dataset contains 50 protein sequences.**

d2dara2 d2dara1 d1wyha2 d2dloa2 d1rutx4 d1rutx3 d2cuqa2 d1x4la2  
d1x4la1 d1x3ha2 d1x3ha1 d2d8za1 d1x61a2 d1x6aa1 d1x6aa2 d2cora2  
d2cora1 d1v6ga1 d1v6ga2 d2d8za2 d1x64a1 d1x64a2 d2co8a1 d1x63a2  
d2dj7a2 d2dj7a1 d2cu8a2 d2cu8a1 d1wyha1 d2dloa1 d1wiga1 d1wiga2  
d2cupa2 d2cupa3 d1x68a1 d2d8ya2 d2d8ya1 d1x62a1 d1x68a2 d1x61a1  
d2d8xa2 d2d8xa1 d1x4ka1 d1x4ka2 d2cuqa1 d2co8a2 d1x63a1 d2cura1  
d2cura2 d1x62a2

**Negative dataset contains 3910 protein sequences.**

d1m32a\_ d1libja\_ d1c7na\_ d1iuga\_ d4q75a\_ d2bkwa1 d1t3ia\_ d1n8pa\_  
d1qz9a\_ d1jff9a\_ d1eg5a\_ d1p3wa\_ d3kgwa\_ d1c11a\_ d2ctza1 d2rfva\_  
d1gc0a\_ d1cs1a\_ d1d2fa\_ d2ch1a1 d1qgna\_ d1pffa\_ d1elua\_ d1u08a\_  
d1lc5a\_ d1b5pa\_ d2ay1a\_ d1bw0a\_ d3pd6a\_ d7aata\_ d2csta\_ d1fg7a\_  
d4wlha\_ d1o4sa\_ d1v2da\_ d1gdea\_ d1m6sa\_ d1v72a1 d1svva\_ d1ajsa\_  
d1wsta1 d2f8ja2 d1lk9a\_ d1vp4a1 d1xi9a1 d2gb3a1 d1yaaa\_ d3gv5b1  
d1t94a2 d3bq0a2 d1js3a\_ d3rcha\_ d3k40a\_ d1xkta1 d2hfka\_ d1jmkc\_  
d5d3ka\_ d2cfba1 d1dfoa\_ d1o69a\_ d1bj4a\_ d3k28a\_ d2bwpa\_ d3lg0a\_  
d2fnua\_ d3ou5a\_ d1z7da1 d1b9ha\_ d1iaya\_ d4msoa\_ d1bs0a\_ d1s0aa\_  
d1sffa\_ d3tqxa\_ d1mdoa\_ d3qboa\_ d3pgya\_ d1bjna\_ d2dkja\_ d1ejia\_  
d1vefa1 d4wxga\_ d3bs8a\_ d3gbxa1 d1w23a\_ d1sefa\_ d1sfna\_ d1sq4a\_  
d1i26a\_ d1ddla\_ d1e57b\_ d1f56a\_ d1bypa\_ d1azca\_ d1ws8a\_ d3u25a\_  
d1cuoa\_ d1lid2a\_ d1rkra\_ d2iaac\_ d4dp1x\_ d1nwpa\_ d2gima\_ d2i7sa\_  
d1qhqa\_ d3ehbb1 d1fftb1 d1gyca3 d1hfua2 d1kbva1 d1kbva2 d1sdda1



d1sdda2 d1gyca1 d1gyca2 d1mzya1 d2bw4a1 d1aoza1 d1aoza3 d1kyaa2  
d1kyaa3 d1kyaa1 d1mzya2 d4e9sa1 d1sddb1 d1sddb2 d1hfua1 d1hfua3  
d1oe1a2 d1oe1a1 d1v10a2 d1v10a3 d1v10a1 d1novc\_ d2bbvc\_ g1gk9.1  
g1cp9.1 g1e3a.1 d3sxwa1 d1j3qa\_ d4luka\_ d1a3qa1 d1iknc\_ d3brda1  
d1p7h11 d1oy3c\_ d1imhc1 d1gjia1 d1zk9a1 d2cxka1 d2bema\_ d1pama1  
d1ea9c1 d1qhoa1 d2fhfa2 d2fhfa1 d1j0ha1 d1csla1 d2bhua1 d1edqa1  
d1f1sa2 d1ut9a2 d1gvia1 d1txka1 d4alac\_ d1pjwa\_ d1rera1 d1s6na\_  
d3uzqb\_ d2phla2 d2phla1 d1fxza2 d1lrha\_ d1uija1 g1dgw.1 d2v09a\_  
d1uika2 d1uika1 d1dgwa\_ d1ep0a\_ d2pa7a1 d1wlta1 d1nxma\_ d2c0za1  
d1ktja\_ d1ds6b\_ d1fstb\_ d4mh8a\_ d1mu2a2 d4i7ga1 d2b5ea2 d2b5ea3  
d2b5ea1 d2b5ea4 d2kp1a1 d2kp2a1 d1hyua3 d1hyua4 d1j08a1 d1h32a1  
d2bjca1 d2hsga1 d1qpza1 d1efaa1 d1ydwa2 d2nvwa2 d1h6da2 d1zh8a2  
d1qkia2 d1xeea2 d1t1ta2 d1r0ka3 d1vkoa2 d1vm6a2 d3qvsa2 d1gr0a2  
d1p1ja2 d2ovga\_ d1sq8a\_ d1rzsa\_ d3kz3a\_ d3orca\_ d3gpdg2 d2q49a2  
d1hdgo2 d2g17a2 d2cvoa2 d2czca1 d3pwka2 d1obfo2 d1i32a2 d1zyao2  
d2pkqo2 d1b7go2 d2hjsa2 d1cf2o2 d1vkna2 d1nvmb2 d1lux8a\_ d1dlya\_  
d4i0va\_ d2bkma\_ d1dlwa\_ d2bmma\_ d2msya\_ d2djoa1 d2r5za\_ d1au7a1  
d1f43a\_ d2lmda1 d1akhb\_ d1s7ea1 d3nara\_ d1zq3p1 d2craa1 d1mija\_  
d4uuta\_ d3a01a\_ d1x58a1 d3rkqa1 d3cmya1 d2cqa1 d2da6a1 d1e3oc1  
d1fjla\_ d1mh3a1 d1ig7a\_ d1x41a1 d1wh7a1 d1gt0c1 d2mw8a\_ d1lfup\_  
d1x2ma1 d1b72a\_ d1wi3a1 d1jgga\_ d1wjha1 d1x2na1 d1mnmc\_ d2cuea1  
d3k2aa\_ d2hosa\_ d2jwta2 d1pufa\_ d1octc1 d2hi3a\_ d1b8ia\_ d4j19a\_  
d3lnqa\_ d1wh5a1 d1b8ib\_ d1fexa\_ d2cqra1 d1guua\_ d1ug2a1 d2cqqa1  
d2ajea1 d4a69c\_ d1h8ac1 d2crga1 d2iw5b1 d1xc5a1 d2cu7a1 d1wgxa1  
d2cjja1 d2ckxa1 d1gvda\_ d1hcra\_ d1tc3c\_ d1gdta1 d1u78a2 d6paxa1  
d6paxa2 d1k78a1 d1xg1a1 d1litya\_ d1ligna1 d3lv8a\_ d1s3ga1 d1zaka1  
d1s4qa\_ d3tvta2 d1uf9a\_ d1khta\_ d1ckea\_ d1osna\_ d1p5zb\_ d4tmka\_  
d3cm0a\_ d1tmka\_ d1jaga\_ d3h86a\_ d1t0hb\_ d1nn5a\_ d2h92a\_ d3kb2a1  
d2c95a1 d1yj5a2 d1kgda\_ d1ly1a\_ d2ak3a1 d1vyva2 d1deka\_ d2grja1  
d1p3ja1 d1y63a\_ d1e4ya1 d1s96a\_ d3iija1 d1lvga\_ d1nksa\_ d1vyua2  
d4e22a\_ d1qf9a\_ d1jjva\_ d1q3ta\_ d1ki9a\_ d1lw7a2 d1teva\_ d1kjwa2  
d1gsia\_ d1x6va3 d1z0ja1 d3umra2 d3gj0a1 d2gaoa1 d1yzga1 d1x3sa1  
d1g7sa4 d1puja\_ d1udxa2 d1kk1a3 d2o52a\_ d1jwyb\_ d1zcaa2 d1zcba2  
d2fv8a1 d2cjwa\_ d3dz8a1 d1xzpa2 d1vg8a\_ d4qxaa\_ d2ew1a1 d1x1ra1  
d2bcgy\_ d3doea1 d3cona\_ d3regaa\_ d3wyga\_ d1upta\_ d2b6ha1 d1zd9a1  
d1lnza2 d1r5ba3 d1n0ua2 d1r2qa\_ d2f91a1 d2rhda\_ d3q3jb\_ d3q85a\_  
d1efma1 d1r8qa\_ d2gf9a1 d2akab1 d1ek0a\_ d1z08a1 d2gcoa1 d2dya2  
d4g01b\_ d2cxa1 d1svia\_ d3q72a\_ d1ni3a1 d4ac9a4 d2erxa1 d2bmea\_  
d1wxqa1 d2gf0a1 d4ldja1 d1zunb3 d1d5ca\_ d4lv5b\_ d1efca3 d1kmqa\_  
d2g6ba1 d3lrpa\_ d1tada2 d2y8ea\_ d4rd4a1 d1z06a1 d2heia\_ d3a58b\_  
d1u0la2 d1d2ea3 d1zj6a1 d2ocba\_ d3rwoa\_ d1mr3f\_ d2e9sa1 d4u5xa1  
d2iwra\_ d2fn4a1 d3bwdd\_ d2nzja1 d2atva1 d2ksqa\_ d3l43a\_ d1mkya2  
d1mkya1 d1wmsa\_ d1jnaya3 d2rmka\_ d1f6ba\_ d1f60a3 d1gota2 d1jala1  
d2fh5b1 d1g16a\_ d2wblc\_ d1m7ba\_ d1wf3a1 d1f5na2 d1t9ha2 d1z6xa1

d1z0aa1 d2fg5a1 d2a5ja1 d2bcjq2 d1s0ua3 d1ky3a\_ d4y0va\_ d4lhwa\_  
d2qmea1 d2atxa1 d1legaa1 d1ryha\_ d1moza\_ d1nrjb\_ d2erya1 d3bfka\_  
d1puia\_ d3j3az1 d3t5ga\_ d1shza2 d3defa\_ d2f7sa1 d3raba\_ d3tsoa\_  
d3aq4a\_ d2a17a1 d3sfva1 d3bc1a\_ d2ncda\_ d1sdma\_ d3h4sa1 d2heha\_  
d2grya\_ g3kin.1 d1kk8a2 d1br2a2 d1goja\_ d1f9va\_ d2mysa2 d1lkxa\_  
d3t0qa\_ d4db1a1 d3gbja\_ d1ry6a\_ d1v8ka\_ d1k8ka2 d1k8ka1 d3uleb1  
d3i33a2 d3i33a1 d1dkgd2 d1dkgd1 d4ci6a2 d1jcfa1 d4a2ba2 d2fxua1  
d1yaga2 d1yaga1 d4cbua2 d1bupa2 d1iqca2 d1iqca1 d1eb7a2 d1nmla2  
d1nmla1 d1nira1 d1qksa1 d3h1jd1 d1hroa\_ d4gedb\_ d3zooa\_ d1mz4a\_  
d1gu2a\_ d1f1fa\_ d1dvva\_ d1c6ra\_ d1c75a\_ d1e29a\_ d1gdva\_ d1cnoa\_  
d1h32b\_ d1co6a\_ d2bh4x\_ d2aiua\_ d5cytr\_ d1jdl\_ d1i8oa\_ d2zboa\_  
d3dmia\_ d1ls9a\_ d1wvec\_ d2yk3a\_ d3ph2b\_ d1dw0a\_ d5aura\_ d1ql3a\_  
d1qn2a\_ d1f1ca\_ d4zzva\_ d2xspa\_ d1leg1a\_ d4v20a\_ d1ojja\_ d4ipma1  
d1gpia\_ d4csia\_ d3pfza\_ d2yoka\_ d2nqya\_ d1h4ga\_ d1hixa\_ d1oa2a\_  
d1olra\_ d3b7ma\_ d4h7ma1 d3wp3a\_ d2vgda\_ d1igoa\_ d3zsea\_ d2nlra\_  
d3wx5a\_ d1oa3a\_ d1pvxa\_ d1m4wa\_ d1f5ja\_ d1oa4a\_ d1ks5a\_ d4ixla1  
d1evsa\_ d1cnt1\_ d1pvhb\_ d1z7ca\_ d1huwa\_ d1bgea\_ d1rhga\_ d1f6fa\_  
d1f45b\_ d1ilrb\_ d1axia\_ d4x51a\_ d1d9ca\_ d4ypgc1 d3oq3a\_ d1lqsl\_  
d1n1fa\_ d1aula\_ d1wu3i\_ d3bes1\_ d3ux9a\_ d1v8fa\_ d2ejca\_ d3muea1  
d3q12a1 d4dnxa2 d1m8pa2 d1v47a2 d1jhda2 d1x6va2 d3rbaa\_ d2qtra\_  
d1nupa\_ d3l92a\_ d1f9aa\_ d1qjca\_ d2h29a\_ d1vlha\_ d1lod6a\_ d1lw7a1  
d1mrza2 d4ruka\_ d3wdpp1 d3wq5a\_ d1gnxa\_ d4gxp\_ d4hz8a\_ d1e4mm\_  
d3aiua\_ d1wcga1 d1qvba\_ d3ahxa\_ d1v02a\_ d2dgaa\_ d1pbga\_ d1vffa1  
d1qoxa\_ d4ha4a\_ d2e17a\_ d1iq0a2 d1irxa2 d1r6ta2 d1ivsa4 d2cyba\_  
d1rqga2 d1j09a2 d2yxna\_ d1f7ua2 d1h3fa1 d1ffya3 d2g36a1 d1nzja\_  
d1jila\_ d1n3la\_ d1i6la\_ d1pfva2 d1h3na3 d3n9ia\_ d3sz3a1 d3sw2a\_  
d1moxc\_ d1dx5i3 d1edmb\_ d1autl2 d1autl1 d1nqlb\_ d1dval1 d1szba2  
d1kigl\_ d2y5fl\_ d1ijqa2 d1gk5a\_ d1gl1sa2 d1nt0a3 d1xdtr\_ d1lmja2  
d1lmja1 d1nzia2 d2wphe\_ d1klil\_ d1pfxl2 d1pfxl1 d1p9ja\_ d1g1ta2  
d1f7ea\_ d4yzub\_ d1m1xb4 d2y5ia\_ d1qlsa\_ d1psra\_ d3n22a\_ d2egda\_  
d4ggfc\_ d2wcea\_ d2luca\_ d4aqia\_ d3nsia\_ d2lp3a\_ d1j55a\_ d1a4pa\_  
d1k8ua\_ d1nsha\_ d1pvaa\_ d3fs7a\_ d1ttxa\_ d1rwy\_ d2kyfa\_ d1rk9a\_  
d1a75a\_ d1exra\_ d1tiza1 d1nyaa\_ d1g8ia\_ d1ggwa\_ d1wdcc\_ d3fwba\_  
d1ggza\_ d2o5ga\_ d1ctaa\_ d1m45a\_ d3i5gc\_ d1sl8a\_ d1fpwa\_ d2scpa\_  
d2roaa\_ d4aqra\_ d3pn7b\_ d1br1b\_ d1s6ca\_ d1bjfa\_ d2obha\_ d1jfka\_  
d1jf0a\_ d1qv0a\_ d1lkja\_ d2mlfc\_ d2m97a\_ d2d8na\_ d4by5a\_ d1jbaa\_  
d4nqga\_ d1wdcb\_ d2mysc\_ d1j7qa\_ d1s6ia\_ d1uhka2 d1r2ua\_ d1dtla\_  
d3kf9a\_ d3pn7c\_ d1gjya\_ d1y1xa\_ d1hqva\_ d1dvia\_ d1df0a1 d4usla\_  
d1k94a\_ d1sfsa\_ d1jfxa\_ d1wkya2 d1uuqa\_ d3wh9a\_ d4m1ra\_ d1xyza\_  
d4xuya\_ d2je8a5 d4bf7a1 d3cuia\_ d1ur4a\_ d1qw9a2 d1lodza\_ d2vzsa5  
d1bqca\_ d2x2ya1 d1qnra\_ d4y7ea1 d1vjza\_ d4k68a\_ d2v3ga\_ d4hpga\_  
d1nofa2 d1nq6a\_ d1h4pa\_ d1aq0a\_ d3ziza\_ d4bs0a\_ d1lecea\_ d1hl1na\_  
d1ta3b\_ d1w91a2 d1i1wa\_ d1uhva2 d1us3a2 d1legza\_ d7a3ha\_ d1tvna1  
d3nyda1 d1ghsa\_ d2cyga1 d4xv0a\_ d2c8na2 d1w32a\_ d3emca\_ d1v6ya1

d1foba\_ d2uwfa1 d2fgla\_ d3niya1 d2c0ha1 d1rh9a1 d1yq2a5 d1szna2  
d1fa2a\_ d1pama4 d5do8a1 d1ea9c3 d1hx0a2 d2fhfa5 d1qhoa4 d1avaa2  
d1m53a2 d4m8ua1 d2gjpa2 d1lwaha2 d4howa1 d1ktba2 d1j0ha3 d3vm5a1  
d2x1ia\_ d1wzaa2 d1uasa2 d2diea1 d1mxga2 d1ht6a2 d1eswa\_ d1iv8a2  
d5cpsa\_ d1ud2a2 d1zjaa1 d3gbea1 d1kwga2 d1wdpa\_ d1gcya2 d1g5aa2  
d1hvxa2 d3dhpa2 d2bhua3 d4do4a1 d3qgva1 d1e43a2 d1g94a2 d2d3na2  
d1gjwa2 d1gvia3 d1x1na1 d1r7aa2 d1tz7a1 d4c7ga2 d2gjxa1 d1jaka1  
d1yhta1 d4toqa\_ d1wb0a1 d1w9pa1 d1eoka\_ d1itxa1 d1kfwal d1goia2  
d1edqa2 d2gsja\_ d1hjxa1 d1vf8a1 d1etob\_ d1umqa\_ d1mixa2 d1e5wa2  
d1j19a2 d1isna2 d2a16b2 d1g4ma1 d1iuka\_ d2csua1 d3q9ub\_ d2yv1a1  
d3q9na\_ d2d59a\_ d1oi7a1 d2yv2a1 d1euca1 d1y81a1 d1wgqa1 d1v89a1  
d2coda1 d1zc3b\_ d1wg7a1 d1u5ea1 d1v61a1 d2coca1 d2ys1a1 d1v5pa1  
d1nty2a d1wjma1 d1wila1 d1u29a\_ d1xx0a1 d1unqa\_ d2zkmx3 d1fhoa\_  
d1v88a1 d2adza1 d1x1fa1 d1p6sa\_ d2coaa1 d1btka\_ d1v5ma1 d1faoa\_  
d2x18a\_ d1dyna\_ d1x1ga1 d4kaxb\_ d2j59m1 d1ki1b2 d1xcga2 d1txda2  
d1u5da1 d1dbha2 d1wlha\_ d1upqa\_ d1v5ua1 d1foea2 d2fjla1 d1eaza\_  
d2dfka2 d2cofa1 d1kz7a2 d1h6ua1 d9ldta1 d2ewda3 d1up7a1 d2dfda1  
d1s6ya1 d1vjta1 d7mdha1 d1hyea1 d1t2da1 d1oj3a3 d1b8pa1 d1ldna1  
d1hyha1 d1civa1 d2a92a1 d1ez4a1 d1i0za1 d1y6ja1 d1gv0a1 d1ur5a1  
d1llda1 d1obba1 d1v8ba1 d1gdha1 d1l7da1 d2dlda1 d1mx3a1 d1ygya1  
d1qp8a1 d1li4a1 d1j4aa1 d2naca1 d1npya1 d3t4ea2 d1a4ia1 d1o0sa1  
d2hk9a2 d2egga2 d1bvua1 d1gq2a1 d1c1da1 d1leha1 d1gtma1 d1euza1  
d1nvtal d3dona2 d1ledza1 d1gpja2 d1vi2a1 d1p77a1 d1nyta1 d1b0aa1  
d1v16a1 d1v91a1 d1txga2 d3f47a1 d1mv8a2 d2pv7a2 d1xc2a3 d2ahra2  
d4xiya1 d2f1ka2 d1pgja2 d1i36a2 d1np3a2 d1teaa3 d1qmga2 d2i76a2  
d2g5ca2 d1wdka3 d1dlja2 d3cuma3 d1kola2 d1f8fa2 d1qora2 d1jqba2  
d1vj0a2 d1cdoa2 d1gu7a2 d1d1ta2 d1xa0a2 d2dm6a2 d1jvba2 d1rjwa2  
d1llua2 d1h2ba2 d1tt7a2 d1piwa2 d1o89a2 d1iz0a2 d1e3ja2 d1yb5a2  
d1uufa2 d1vj1a2 d1e3ia2 d3gpdg1 d2nvwal d1u8fo1 d1ydwal d1hdgo1  
d2g17a1 d1cf2o1 d2czca2 d1r0ka2 d1obfo1 d2cvoa1 d1ebfa1 d1h6da1  
d1i32a1 d1zh8a1 d2q49a1 d1qkia1 d1j5pa4 d3pzra1 d1xeaa1 d1vkoa1  
d1vm6a3 d3qvsa1 d2pkqo1 d1b7go1 d1gr0a1 d1p1ja1 d1lc0a1 d1j0xo1  
d3pwka1 d2hjsa1 d1zyao1 d1vkna1 d1t1ta1 d1nvmbl d3sjua\_ d3ojfa1  
d1xu9a1 d2jjya1 d1n7ha\_ d1y1pa1 d1h5qa\_ d1jtva\_ d4fs3a\_ d2bkaa1  
d1gy8a\_ d2c5aa1 d1ulsa\_ d1ooea\_ d2b69a1 d1y5ma1 d1spxa\_ d1aela\_  
d1bxka\_ d1ydea1 d1gega\_ d1hdoa\_ d1o5ia\_ d1e6ua\_ d1snya1 d2rhca\_  
d3zv4a\_ d5ceja\_ d2d1ya1 d1fjha\_ d3w8ea\_ d2fmua1 d1x1ta\_ d1rpna\_  
d3ay7a1 d1k2wa\_ d1eq2a\_ d2hrba1 d3ruaa\_ d2ew8a1 d4hwka\_ d1xgka\_  
d2bd0a1 d1yo6a1 d2a35a1 d2ntva\_ d1vl8a\_ d1hdca\_ d4bkua\_ d2ag5a1  
d2q45a\_ d1nffa\_ d4iy1a\_ d1zbqa1 d1kewa\_ d1ek6a\_ d1ja9a\_ d2q46a2  
d1iy8a\_ d1cyda\_ d2ptga\_ d1hxha\_ d1uzma1 d3lyla\_ d4m89a\_ d3wyea\_  
d2blla1 d1w6ua\_ d1sb8a\_ d2q2va\_ d4nr0a\_ d1e6wa\_ d2gasa\_ d3oiga1  
d2bgka1 d1mxha\_ d1vl0a1 d1rkxa\_ d1r6da\_ d1wmaa1 d1e7wa\_ d2c07a1  
d1xkqa\_ d3tzha\_ d1g0oa\_ d3lz6a\_ d1qyca\_ d1ledoa\_ d1gz6a\_ d1loc2a\_

d1t2aa\_ d1zema1 d2xoxa\_ d1z45a2 dlgeea\_ d1p33a\_ d3lt0a\_ d4e6pa\_  
d2wyua\_ d1db3a\_ d4q9na\_ d1xhla\_ d4olma\_ d1fmca\_ d2uvda\_ d2gdza1  
d1uaya\_ d2z1ma\_ d2o23a2 d2fr1a2 d2fr1a1 d1qsga\_ d1qyda\_ d4zjua\_  
d2a4ka1 d1yb1a\_ d1wvga1 d1yxma1 d3f4ba\_ d1mg5a\_ d1xg5a1 d1r55a1  
d3gboa\_ d1atla\_ d1kufa\_ d1buda\_ d4q1la\_ d1yp1a\_ d1wnia\_ d1cmxa\_  
d1xd3a\_ d3ifwa\_ d1e2ta\_ d4c5pa\_ d2bsza1 d4bgfa\_ d1w4ta1 d1mdwa\_  
d1qxp4 d1ziva1 d1zcm1 d1t3ca\_ d1lepwa3 d2a97a\_ d3fiea\_ d3ioqa\_  
d1fh0a\_ d1o0ea\_ d1khqa\_ d1m6da\_ d2cb5a\_ d1cs8a\_ g8pch.1 d1s4va\_  
d2pnsa\_ d1vsna1 d1mira\_ d1liwda\_ d2oula\_ d7pcka\_ d3bwka\_ d3bcna\_  
d2p86a\_ d1pvja\_ d1pcia\_ d1deua\_ d4bs6a\_ d1xkga1 d1cqda\_ d1jqpa2  
d2c0ya\_ d2bdza\_ d3p5ua\_ d1zoya1 d1qo8a2 d1d4ca2 d1chua2 d1jnra2  
d1kf6a2 d2jk6a2 d2jk6a1 d1feca1 d1feca2 d1lpfa1 d1lpfa2 d1xhca1  
d1xhca2 d1dx1a2 d1dx1a1 d1gera2 d1m6ia2 d1onfa1 d1onfa2 d3lada2  
d3lada1 d1w4xa1 d1w4xa2 d1gesa2 d1mo9a1 d1xdia1 d1f12a2 d1f12a1  
d1fcda1 d1fcda2 d1h6va2 d1h6va1 d1mo9a2 d1gv4a2 d1gv4a1 d2gv8a2  
d2gv8a1 d1aoga1 d1aoga2 d1hyua1 d1ebda1 d1ebda2 d3dk9a1 d1qlra2  
d1qlra1 d1gesa1 d1zbf1a\_ d2z1ha\_ d2etja1 d3qioa1 d1j11a\_ d2e41a\_  
d1j12a\_ d2lsna1 d1lio2a\_ d1uaxa\_ d2yv0x\_ d1mu2a1 d1ekea\_ d1i39a\_  
d1pn0a1 d1reo1 d1ju2a1 d2f5va1 d3c96a1 d2gmha1 d1pj5a2 d1gpea1  
d1o5wa1 d1n4wa1 d1k0ia1 d2dw4a2 d2ivda1 d2voua1 d1kdga1 d1s5ja1  
d2hbja2 d2igia\_ d1wlja\_ d1qhta1 d4dlea1 d1tgoa1 d2f96a1 d3tr8a1  
d3mxma\_ d1q8ia1 d1y97a1 d1w0ha\_ d1kfsa1 d2py5a1 d1noya\_ d1d5aa1  
d1yt3a3 d2guia\_ d3mwp1 d4kb1a\_ d2v76a\_ d1wj1a1 d1aqca\_ d1qqga2  
d1qqga1 d1ntva\_ d1n3ha\_ d4dbba\_ d3f0wa1 d1p3ra\_ d1wgua1 d2cy4a1  
d3hqca\_ d1wvha1 d1xr0b1 d1jmx4 d1pbya3 d1pbya4 d1r7ha\_ d1faaa\_  
d1wika1 d1xfla\_ d1ttza1 d2f51a1 d1ti3a\_ d1nhoa\_ d1sena\_ d2i4aa\_  
d1ep7a\_ d1zmaa1 d1fo5a\_ d3lefa1 d3diea1 d2yana1 d1z6na1 d1oaza\_  
d3zywa1 d4aj8a\_ d1nm3a1 d4fiwa\_ d1wmja\_ d4hs1a1 d1liloa\_ d1xwaa1  
d1wjka1 d2vm1a\_ d1fb6a\_ d1gh2a\_ d1h75a\_ d1nw2a\_ d1kx5b\_ d3a6na\_  
d4m6ba2 d2nqbd\_ d3wkjd\_ d2yfwe\_ d4h9na\_ d5bnxa\_ d1kx5c\_ d3r45a\_  
d1eqzb\_ d4jjnb\_ d1f66c\_ d1eqza\_ d4wnnb\_ d1kx5a\_ d1u35c1 d1id3a\_  
d2nqbc\_ d1kx5d\_ d1ku5a\_ d1f1ea\_ d1tafa\_ d1tafb\_ d1jfib\_ d1q9ca\_  
d1h3ob\_ d2byka1 d1n1ja\_ d4g92b\_ d1bh9a\_ d1jfia\_ d1h3oa\_ d2bykb1  
d1n1jb\_ d1pd212 d1nhya2 d2a2ra2 d1k0dd2 d1f2ea2 d1gsua2 d1f3ba2  
d2fhea2 d2pvqa1 d1tw9a2 d1oyja2 d1e6ba2 d1k0ma2 d3ik7a1 d4is0a1  
d1r5aa2 d1j1va2 d1m0ua2 d3gtub2 d1z9ha2 d1okta2 d1axda2 d2gsra2  
d1tu7a2 d1k3ya2 d1zgma1 d1b48a2 d1gnwa2 d1gwca2 d2gsta2 d1glqa2  
d1oe8a2 d1pn9a2 d1v2aa2 d1fw1a2 d1duga2 d1ig8a1 d1czan2 d1czan3  
d1czan1 d1ig8a2 d1czan4 d1bg3a3 d1bg3a2 d1bg3a1 d1qqya\_ d1gd6a\_  
d1f6ra\_ d1ivma\_ d2gv0a\_ d1iiza\_ d2z2fa\_ d1j8xa\_ d1ghla\_ d1b9oa\_  
d1741a\_ d1691a\_ d2o4wa\_ d1p37a\_ d1k28a3 d1xjta1 d1jtma\_ d2f2qa\_  
d4e97a1 d1ro5a1 d1pv8a\_ d1w5qa\_ d2c1ha\_ d1ohla\_ d1qsta\_ d2beia1  
d4m3sa\_ d1u6ma1 d1ygha\_ d1yk3a1 d3dr6a\_ d1xmta\_ d1z4ea1 d2ge3a1  
d1bo4a\_ d2fiaa1 d2jdca1 d1y9wa1 d3to7a\_ d1wwza1 d2f14a1 d2ozua1

d2b5ga\_ d2cy2a1 d2p0wa\_ d1cm0a\_ d4pswa\_ d1yrea1 d1yr0a1 d1m4ia\_  
d2gana1 d1yvka1 d1ghea\_ d2g3aa1 d1y7ra1 d2euia1 d1q2ya\_ d2fsra1  
d1xeba\_ d2ae6a1 d1cjwa\_ d1qsma\_ d2aj6a1 d1y9ka1 d1i12a\_ d1vkca\_  
d2atra1 d1n71a\_ d2d4pa1 d2fiwa1 d2fe7a1 d1tiqa1 d2ou2a\_ d1yx0a1  
d2fcka1 d1p0ha\_ d2j8ma\_ d2pq8a\_ d1z4ra1 d1s3za1 d1ufha\_ d1prtc1  
d2wv6d\_ d1prtf\_ d1l1trd\_ d4l63b1 d1r4pb\_ d1prtd\_ d1tl0f\_ d2bosa\_  
d1prtb1 d3chbd\_ d1xvqa1 d1pn0a2 d3hy2a\_ d2cvba1 d1o8xa\_ d1lu4a\_  
d1we0a1 d2bmxa1 d2a4va1 d1psqa\_ d1xiya1 d1q98a\_ d1n8ja\_ d1zofa1  
d2ggta\_ d3tjja\_ d4je1a1 d1o73a\_ d3s9fa\_ d2zcta\_ d1qmva\_ d1jfua\_  
d2b1ka\_ d5dvba1 d2b5xa1 d2v2ga\_ d3tb2a\_ d4llra\_ d4fh8a1 d1e2ya\_  
d1knga\_ d2h30a\_ d1i5ga\_ d2z9sa\_ d2f8aa1 d1tp9a1 d2b7ka\_ d1nm3a2  
d3hvva\_ d2wfca1 d4kcea\_ d1xvwa1 d4gqca1 d3qpma\_ d4k1fa\_ d1zsoa1  
d1gp1a\_ d1prxa\_ d4od7a1 d1z6ma1 d4mcua1 d4dvca1 d3l9sa\_ d1un2a\_  
d3rppa\_ d1rmka\_ d1ixta\_ d1eyoa\_ d1cna\_ d1g1pa\_ d1f3ka\_ d1fyga\_  
d1cg2a1 d1yloa2 d1y7ea2 d1y0ya3 d1lfwa1 d1vixa1 d1fnoa4 d1vhoa2  
d1ysja1 d1vhea2 d1z21a1 d2fvga2 d1vgya1 d1r3na1 d2grea2 d1xmba1  
d1rtqa\_ d1etha2 d1w52x1 d2ppla1 d1hpla2 d1lpbb2 d2oxea1 d1bu8a2  
d1rpla2 d1ysl1x\_ d4hs9a\_ d1ispa\_ d1ku0a\_ d3qmma\_ d1ra6a\_ d1muka\_  
d3gsza\_ d1khva\_ d1te9a\_ d2xwha\_ d3uqsa\_ d3hkwa\_ d3n6ma\_ d2cjqa\_  
d2xyma\_ d1teba\_ d1te8a\_ d1u09a1 d4wfxa\_ d3tyqa\_ d2pgga1 d1lgya\_  
d4l3wa\_ d1gz7a\_ d1lukca\_ d2hqya1 d2hqya2 d1lrza2 d1lrza3 d1ne9a2  
d3groa\_ d1pjaa\_ d1ei9a\_ d2ftba\_ d1pmpa\_ d2rcqa1 d4lkpa\_ d1sa8a\_  
d1vyfa\_ d1lpja\_ d3vg7a1 d4azqa1 d1o8va\_ d5bvqa\_ d1p6pa\_ d2qo4a\_  
d1opba\_ d1yiva1 d1o1va\_ d4bvma1 d4tkba\_ d4i3ba\_ d1bwya\_ d1ftpa\_  
d1ggla\_ d4gkca\_ d1cbia\_ d3p6da1 d1kqwa\_ d2a0aa1 d2ddfa\_ d3zxha\_  
d1cgla\_ d1rm8a\_ d1leaka2 d1hy7a\_ d2jsda\_ d1cxva\_ d1hv5a\_ d1i76a\_  
d3p0ya1 d1igra1 d1igra2 d1n8yc2 d1n8yc1 d1m6ba2 d1m6ba1 d1m4la\_  
d2bk7a\_ d3fjua\_ d1z5ra1 d1kwma1 d1uwy2 d2c1ca1 d1dtda\_ d1h81a2  
d1jgta2 d1ofda3 d1ecfa2 d1q15a2 d1ct9a2 d1ao0a2 d1te5a\_ d1c8nc\_  
d1x36a\_ d1smvc\_ d1ng0c\_ d4sbvc\_ d1opoa\_ d1f2nc\_ d1cixa\_ d1y29a\_  
d1v7fa\_ d2jtba\_ d1g9pa\_ d1llupa\_ d1qk7a\_ d1mb6a\_ d2a2va\_ d1niya\_  
d1i25a\_ d1hvwa\_ d2mpqa\_ d1ie6a\_ d1kqha\_ d1la4a\_ d2mxoa1 d1d10a\_  
d1koza\_ d1qk6a\_ d1emxa\_ d1lqra\_ d1c6wa\_ g1apy.1 d3ljqa\_ g1k2x.1  
d1rypd\_ d1irua\_ d1rypc\_ d3unfk\_ d1rypa\_ d1j2pa\_ d1irui\_ d1j2qh\_  
d3unfh\_ d1m4ya\_ d1rypb\_ d1irul\_ d1irug\_ d1iru2\_ d1q5rh\_ d1rypg\_  
d1g3ka\_ d1iruf\_ d1q5qa\_ d1e94a\_ d1irub\_ d1ryph\_ d3ty6a\_ d1iruj\_  
d1iruk\_ d1rype\_ d1irud\_ d1irue\_ d3mi01\_ d1rypf\_ d1iruh\_ d2z3ba\_  
d1iruc\_ d3mka2\_ d1irul\_ d1ny721\_ d1ny722\_ d1a6ca3\_ d1a6ca2\_ d1a6ca1  
d1pgl21\_ d1pgl11\_ d1ny711\_ d1mqta\_ d1d4m3\_ d1fmd3\_ d2mev1\_ g1aym.1  
d1ev13\_ d4q4w1\_ d1r1a3\_ d2x5ia\_ d1rhi1\_ g1r1a.1\_ g1d4m.1\_ g1rhi.1  
d1b35b\_ d1loopa\_ d1tme1\_ d4iv1a\_ g1pvc.1\_ g1fpn.1\_ d1fpn1\_ d4gb31\_  
d1d4m1\_ d1fmd1\_ d1ev11\_ d2wzr3\_ g1cov.1\_ d1qqp3\_ g1fmd.1\_ d2x5ic\_  
d1rhi3\_ g1oop.1\_ d1hxs1\_ d1fpn3\_ d1bev1\_ g2mev.1\_ d1eah3\_ d1aym1\_  
d1pvc3\_ d1qqp1\_ d1zba3\_ d1h8ta\_ d3vbhc\_ g1b35.1\_ g1bev.1\_ d1hxs3\_

glev1.1 d1bev3\_ g1tmf.1 d1tmf1\_ d1b35a\_ d2mev3\_ gleah.1 g1h8t.1  
d1eah1\_ d4q4w3\_ d1r1a1\_ d1aym3\_ d1pvc1\_ d1zba1\_ d1h8tc\_ d1loopc\_  
d1tme3\_ g1qqp.1 d4iv1c\_ g1tme.1 d1y14b1 d2nn6i1 d1i941\_ d2zjra2  
d1smxa\_ d2qamc2 d1hh2p1 d2r7da1 d1r12a2 d1wfga1 d3bzka4 d1x6oa2  
d3a0ja\_ d2j01d2 d2ja9a1 d4q15a\_ d1hr0w\_ d1luza\_ d2n3sa\_ d2vnud1  
d1h95a\_ d1go3e1 d2nn6h1 d1ne3a\_ d2m01a\_ d1iz6a2 d1jjga\_ d1e3pa2  
d2ix0a3 d2ix0a2 d21xja\_ d1ueba3 d1ueba2 d2z0sa1 d1u01a1 d2ix0a1  
d2eifa2 d2je6i1 d3i2za1 d2c35b1 d2ahob2 d1t9ha1 d3i4oa\_ d2qall1  
d1jt8a\_ d2nn6g1 d1g6pa\_ d3cama\_ d1i94q\_ d1c9oa\_ d1d7qa\_ d2ba0a1  
d2vnud2 d2vnud3 d1khia2 d2qalq1 d1wi5a1 d1xta2 d1ny4a\_ d4w9ta\_  
d4x2ra1 d1ka9f\_ d1qo2a\_ d4axka1 d1thfd\_ d1h5ya\_ d4u28a\_ d2y88a\_  
d4wd0a\_ d1vzwa1 d3ia2a\_ d1a88a\_ d4dgqa1 d1hkha\_ d1zoia\_ d3syxa1  
d1mkeal d2p8va\_ d1xoda1 d1i7aa\_ d1qc6a\_ d1legxa\_ d4lt9a1 d3tc7a1  
d3hoja\_ d1i4na\_ d3vnda\_ d3n18a1 d1geqa\_ d3naval d1v5xa\_ d4a2ra1  
d3tc6a1 d1ujpa\_ d4ijba\_ d1xcfa\_ d1vc4a\_ d1rd5a\_ d1qopa\_ d3b5va\_  
d2r80b\_ d1cqxa1 d1cg5a\_ d3boma\_ d2h8fb\_ d2raoa\_ d3bj1a\_ d4hrrb\_  
d2r50a\_ d3d1kb\_ d2aa1b1 d3zhwa\_ d3hf4b\_ d3gdja\_ d1jebb\_ d3bj1b\_  
d1x9fb\_ d1wmub\_ d1gcva\_ d3bcqb\_ d3d4xb\_ d1gvha1 d2dc3a\_ d3hf4a\_  
d4yu3a\_ d3k8ba\_ d1qpwb\_ d2r80a\_ d3bcqa\_ d1v4wa\_ d3wtgb\_ d1j17a\_  
d4esaa\_ d1a9we\_ d3d1ab\_ d1fsla\_ d4h21a\_ d1v4wb\_ d1mwca\_ d1vhba\_  
d1jeba\_ d1spgb\_ d1h97a\_ d1q1fa\_ d1tu9a1 d3d1aa\_ d1hdsb\_ d3hyub\_  
d2zfb\_ d3fs4a\_ d1oj6a\_ d1shrb\_ d4h21b\_ d4yu3b\_ d1spga\_ d3hrwa\_  
d3qqra\_ d3at5a\_ d4wchd\_ d3hyua\_ d1cg5b\_ d1uc3a\_ d1hbra\_ d2raob\_  
d1outb\_ d4esab\_ d3gdjb\_ d3qqqa\_ d1x9fc\_ d3vrf\_ d1litha\_ d3mkba\_  
d3d4xa\_ d3mjpa\_ d1j16a\_ d3fh9a\_ d1outa\_ d2dc3b\_ d1lit2a\_ d3eoka\_  
d3g46a\_ d1qpwa\_ d3vrfb\_ d1ch4a\_ d1x9fd\_ d1hdsa\_ d2zfa\_ d3mkbb\_  
d1or4a\_ d3wtga\_ d1a4fa\_ d3fh9b\_ d3bomb\_ d3cy5a\_ d3at5b\_ d1x9fa\_  
d2oifa\_ d4lmxb\_ d1cpcb\_ d3v57a\_ d1kn1a\_ d1cpca\_ d4f0ta\_ d2vjha\_  
d4po5b\_ d1eyxa\_ d1alla\_ d4f0tb\_ d1b33b\_ d1b8db\_ d4h0mb\_ d1b33a\_  
d2vjhb\_ d4lm6b\_ d2vmlb\_ d1allb\_ d2vjta\_ d3dbja\_ d2vmla\_ d2vjtb\_  
d4f0ub\_ d1f99b\_ d4rmpa1 d1lliaa\_ d1eyxb\_ d2uulb\_ d4lmsb\_ d4f0ua\_  
d2bv8a\_ d1f99a\_ d2bv8b\_ d2c71b\_ d3dbjb\_ d4rmpb1 d1b8da\_ d4h0ma\_  
d3v57b\_ d1kn1b\_ d1liab\_ d2uula\_ d2j96a\_ d2xqfa\_ d1ea5a\_ d1f6wa\_  
d1dx4a\_ d1qe3a\_ d1k4ya\_ d4qwwa\_ d2ha2a\_ d2h0ba\_ d2erfa\_ d1h30a2  
d3mw4a1 d1pz7a\_ d2r1ba\_ d3v64a1 d1d2sa\_ d3bopa1 d3mw3a1 d1okqa1  
d1okqa2 d1b9ra\_ d1offa\_ d1frfa\_ d3wcqa\_ d1e9ma\_ d1l5pa\_ d1wria\_  
d1i7ha\_ d3av8a\_ d1czpa\_ d1rfka\_ d3p1ma1 d3b2ga\_ d2bt6a2 d4iuaa3  
d4bvva\_ d5hpga\_ d3k65a\_ d1ki0a3 d1ki0a2 d1ki0a1 d1a0ha1 d1pmla\_  
d3sp8a3 d2feba1 d1f74a\_ d3l21a\_ d2e1da\_ d1to3a1 d1w3ia\_ d1sfla\_  
d1n7ka\_ d1vcva1 d4imea\_ d1wa3a\_ d2ocza1 d1f2ja\_ d3m16a\_ d2yxga\_  
d1ub3a\_ d3a5fa\_ d1fbaa\_ d1l6wa\_ d1xfba1 d1wx0a1 d1vpxa1 d1ojxa\_  
d1mxsa\_ d2a4aa1 d1xkya1 d3cq0a1 d3s1xa\_ d1f05a\_ d1fdja\_ d3cpra1  
d4d2ja\_ d1e88a1 d1l6ja5 d1l6ja4 d1eaka4 d1l6ja3 d1h8pa2 d1h8pa1  
d3rp2a\_ g1lucy.1 d1fuja\_ d2zchp\_ d3w94a\_ d1si5h\_ d1l06a\_ g2pka.1

d1cgha\_ d1kigh\_ d1a5ia\_ d3s9ba\_ d1hj8a\_ d1ao5a\_ d2anya\_ d1q3xa1  
d1gvza\_ dlazza\_ d4gsoa\_ d2f91a1 d1iaua\_ d1gdna\_ d1eufa\_ g1fiw.1  
d1eq9a\_ d4nfea\_ d2rdla\_ d1spja\_ d1elva1 d1a7sa\_ d1lekbb\_ d1pfxc\_  
d1yc0a\_ d2aiqa\_ g1fiz.1 d1fi8a\_ d4k60a\_ d4dgja\_ d1mzaa\_ d1op0a\_  
d3tjva\_ d1pytd\_ d1sgfg\_ g1gg6.1 d2eeka\_ g1rtf.1 d1a0ja\_ d3g01a\_  
d1pytc\_ d4e7na\_ d1ddja\_ d1z8ga1 d2hlca\_ d1npma\_ d1brup\_ g1jou.1  
d1sgfa\_ d1autc\_ g2hnt.1 g1kdq.1 d3s69a\_ d4crga\_ d1fxya\_ d1bqya\_  
d1svpa\_ d1mbma\_ d3su6a1 d1cu1a1 d4agka\_ d1vcpa\_ d1q31a\_ g1n11.1  
d3e90b\_ d3u1jb\_ d1dzka\_ d4tlja\_ d2a2ua\_ d4wfva\_ d3t1da\_ d4iaxa\_  
d3zq3a\_ d2nnda\_ d1i4ua\_ d1kxo\_ d1bbpa\_ d1kt7a\_ d1lexsa\_ d3s26a1  
d11f7a\_ d1qfta\_ d4gh7a\_ d1z24a1 d1qabe\_ d1xkia\_ d1lew3a\_ d3bx7a\_  
d4iawa1 d1n0sa\_ d1gkab\_ d3kzaa\_ d2k23a\_ d219ca1 d2joza1 d1gm6a\_  
d3kffa\_ d3saoa1 d1e5pa\_ d1yupa1 d1iiua\_ d4lu0a\_ d1of8a\_ d3unda1  
d3e9aa1 d1vr6a2 d1n8fa\_ d2qkfa\_ d1d9ea\_ d1e69a\_ d1mv5a\_ d3g60a4  
g1ii8.1 d1ewqa2 d1ji0a\_ d1v43a3 d2wmfa1 d1vpla\_ d1g2912 d4a82a2  
g1f2t.1 d2d62a1 d3tuic1 d2bbsa1 d3g60a3 d2ixea\_ d1g6ha\_ d1sgwa1  
d2qi9c\_ d3rlfa1 d3b60a1 d3d31a2 d2pzea1 g1xew.1 d1jj7a\_ d1oxk2  
d2onka1 d1wlwa\_ d1iwea\_ d1qf5a\_ d1vmaa2 d1nija1 d1np6a\_ d2p67a1  
d3ihla\_ d1okkd2 d11s1a2 d1s1ma2 d1iona\_ d2v40a\_ d1dj3a\_ d3hida\_  
d2vo1a1 d2g0ta1 d1vcoa2 d1j8mf2 d1g3qa\_ d1xjca\_ d1p9ba\_ d1qzxa3  
d1ihua2 d1ihua1 d2qm8a\_ d1dj2a\_ d4ioja\_ d1cp2a\_ d1yrba2 d1hyqa\_  
d3gqba2 d1skye3 d1xp8a1 d1tf7a2 d1tf7a1 d1ye8a1 d1skyb3 d2qe7d2  
d4blta\_ d4huta\_ d3l1daa2 d4hyya\_ d2i3ba1 d1cr1a\_ d3j9tb2 d3ntua2  
d1vdza1 d2z43a\_ d1e9ra\_ d1nlfa\_ d3ziaa2 d1n0wa\_ d1g6oa\_ d3ziad2  
d3j9ta2 d1pzna2 d3gqbb2 d2i49a\_ d1nnfa\_ d1xvxa\_ d1ursa\_ d1iuda\_  
d4m1va1 d1twya\_ d3e13x\_ d2nxoa1 d4pfua\_ d3ttma\_ d1elja\_ d2qmwal  
d1us5a\_ d1y3na1 d1jeta\_ d1uqwa\_ d4f19a1 d2esna2 d3thia\_ d3fasa1  
d2uyeb\_ d2xwva1 d1r9la\_ d2fyia1 d1pb7a\_ d2ozza1 d1sw5a\_ d1nh8a1  
d1vr5a1 d2g29a\_ d1xs5a\_ d3lswa\_ d2z23a\_ d3w9va\_ d3tcha\_ d1q35a\_  
d1z7me1 d3q27a\_ d1p99a\_ d1ve4a1 d2i6ea1 d4mcoa1 d4n8ya\_ d1eu8a\_  
d1zbma1 d1hs1a\_ d1ixca2 d1j1na\_ d1xvya\_ d1y9ua\_ d2z22a1 d1xoca1  
d4oera\_ d1wdna\_ d5f1qa1 d1xt8a1 d1i6aa\_ d4gwoa\_ d4igta1 d1pc3a\_  
d4mmpa1 d1o63a\_ d2cz1a1 d2onsa2 d4mija1 d4ok5a1 d2bmfa1 d2bmfa2  
d1yksa1 d1yksa2 d1jr6a\_ d2qeqa1 d2j1qa1 d1a1va2 d1eh3a\_ d3skpa\_  
d1dtza1 d1dtza2 d1ieja\_ d1jnfa2 d1ce2a1 d1jnfa1 d1b1xa2 d1b1xa1  
d1jw1a1 d1jw1a2 d1ryoa\_ d1h76a1 d1h76a2 d1c4oa1 d2p6ra3 d2p6ra4  
d1oywa2 d1oywa3 d1wrba1 d1w36b2 d1w36b1 d1c4oa2 d3bora\_ d1t6na\_  
d2eyqa5 d2eyqa3 d2eyqa2 d2zu6a2 d1veca\_ d1uaaa1 d1w36d1 d2g9na1  
d1z3ix2 d2rb4a\_ d1hv8a1 d1hv8a2 d1t5ia\_ d1w36c2 d2j0sa2 d2j0sa1  
d1fuka\_ d3hjha1 d1z5za1 d1qdea\_ d1z63a1 d1s2ma2 d1s2ma1 d1wp9a1  
d1wp9a2 d1gm5a3 d1gm5a4 d3dina4 d3dina3 d1q0ua\_ d1w36c1 d1z3ix1  
d1nkta3 d1nkta4 d1uaaa2 d1w36d2 g1qhh.1 d2fwra2 d2fwra1 d2fkza\_  
d1zujal d1s3qa1 d2fjca1 d1z6om1 d1veia\_ d4dyya\_ d1jiga\_ d3gvya\_  
d2pyba\_ d4cy9a1 d3bvfa1 d1r03a\_ d2cf7a\_ d1nf4a\_ d1zs3a1 d4iwka\_

d3ka8a\_ d3np0x\_ d1n1qa\_ d11b3a\_ d4e6ka\_ dlz6oa1 d2fzfa1 d4dyua\_  
d3ge4a\_ dljgca\_ d4am4a\_ d2z6ma\_ dlji5a\_ dlvlga\_ dl1koa1 dlkrqa\_  
d3qz3a\_ d1o9ra\_ d2ffxj\_ d1euma\_ d1yv1a1 d2v2pa\_ dlj30a\_ d4di0a\_  
d1dpsa\_ d1oewa\_ d2qzxa\_ d2asia\_ d1psoe\_ d1miqa\_ d1smra\_ d2h6ta\_  
d1pfza\_ dlizda\_ d3hd8a\_ dlj71a\_ d1dpja\_ d4aa9a\_ d1t6ex\_ glb5f.1  
g11ya.1 g1htr.1 d1qdma2 d1bxoa\_ d1wkra\_ d1tzsa\_ d1libqa\_ d2qzwa\_  
d1ex4a2 d1c6va\_ d1wgra1 d1ef5a\_ d1wfyal d1e8ya3 dlwgya1 dl1fda\_  
d2cs4a1 d1wxma1 d2byea1 d3kh0a1 d2byfa1 d1wxaa1 d1e7ua3 d1h4ra3  
d4yl8a1 d2a16a3 d117ya\_ d1wgda1 d1wgga1 d4q5eb\_ dlwjna1 dlse9a\_  
d3n3kb\_ d1wz0a1 d1we6a1 d2m0xa\_ d2gbka\_ d3rt3b1 dlwh3a1 d1sifa\_  
d2ekec2 d4ii2b1 d4hk2a1 d1c3ta\_ d1m94a\_ dlwgha1 d1ttna1 dlwx8a1  
d3v6cb1 d2ma9b\_ d4i61b1 d1bt0a\_ d2jvca1 d1iyfa\_ d2k1fa\_ dlwxva1  
d1wf9a1 d1t0ya\_ d2io0b2 d1x1ma1 d2gbma\_ d1zw7a1 d2m17a\_ dlud7a\_  
d1we7a1 d21wpa\_ d2gbja\_ d1wjua1 d1v6ea1 d1v86a1 d4eewa\_ dlwiaa1  
d4icva\_ d4gu2a\_ d1wx7a1 d1wy8a1 d4hjka1 d2faza1 d1v5oa1 dlgl9b1  
d1gkub1 d1yvca1 d1yeza1 d1um8a\_ d1ixza\_ d1qvra2 d1qvra3 dlqzma\_  
d1sxjc2 dljr3d2 d2p65a\_ dlg8pa\_ d3hu3a3 d1sxjd2 dl1nfa\_ d1in4a2  
d1sxja2 d1tuea1 d2ce7a2 d1w5sa2 d1sxjb2 d1d2na\_ d1ny5a2 d1ofha\_  
d2gnoa2 d2a5yb3 d1fnna2 d1u0ja1 d11v7a\_ d1iqpa2 d2fnaa2 d1ixsb2  
d4gita\_ d1sxje2 d1g41a\_ d2e3fa\_ d1mm0a\_ d2e3ea\_ d211da\_ d2ny8x\_  
d2e3ga\_ d2ny9x\_ d2nz3a\_ d21j7a\_ d2m8bb1 d2kyqa\_ d3psma\_ dljkza\_  
d1jxca\_ d2g11a\_ d1ugla\_ d4uj0a\_ d2k4ua\_ d1hp2a\_ d2lu9a\_ dlbaha\_  
d2meoa1 d1wm7a\_ d1n8ma\_ d1jlza\_ d1wpda\_ d1c55a\_ d1pvza\_ dlwt7a\_  
d1rjia\_ d1wz5a\_ d1m2sa\_ d1pjva\_ d1c49a\_ d1qkya\_ d2ktca1 dlwmta\_  
d1du9a\_ dlj5ja\_ d1r1ga\_ d1t0za\_ d2i61a\_ d1t1ta\_ d1sn4a\_ dlkv0a\_  
d21kba\_ d1npia\_ d1wwna\_ d1pe4a\_ d2kbka\_ d21i7a\_ d2kbha\_ dl1dq7a\_  
d1sega\_ dlomya\_ d1zywa1 dljzaa\_ d2jccqa\_ d1bnla\_ d1bvsa3 d1ixra2  
d1iyjb4 d1iyjb5 d1iyjb3 d1o7ia\_ d4ipca1 d1x3ea\_ d4apva\_ dljb7a1  
dljb7a2 dljb7a3 d3kdfa\_ dlue1b\_ d1wjja1 d3eiva\_ d1xjva2 d1xjva1  
d2ccza2 dlse8a\_ d111oc\_ dljb7b\_ d1qvca\_ d3ulla\_ d1qzga\_ d1miau4  
d1miau5 d1miau3 d3g48a1 dlgd7a\_ d1mkha\_ d1jjcb3 d1pyba\_ d3ubub\_  
d1legia\_ d1qo3c\_ d1v7pa\_ d1tdqb\_ d3ubua\_ d1c3ab\_ d1h8ua\_ d3bx4b\_  
d1t8ca1 d1sb2a1 d1qdda\_ d2ziba1 d3cada\_ d1byfa\_ dlj34b\_ dljwia\_  
dljzna\_ d1c3aa\_ d1oz7b\_ d1wmza\_ d3bdwb\_ d1hq8a\_ d1fifa1 d3hupa\_  
d1wk1a1 dlumra\_ d2afpa\_ d3bx4a\_ d1gz2a\_ d1sl6a\_ d1v7pb\_ d3g8ka\_  
d1ixxa\_ dlj34a\_ dljwib\_ dlgl1sa1 d1y17a1 d1ja3a\_ d1fvub\_ d3bdwa\_  
d1sb2b1 d1fvua\_ dlumrc\_ d1oz7a\_ d4m17a\_ d3cfwa1 d1ypqa1 dlgl1ta1  
d3fd4a\_ d319jc\_ d4dn8a1 d1v41b\_ d1rd11\_ d2msba\_ d1dgsa2 d1fvia1  
d1ckma1 d1x9na2 d3azya\_ d3wvja\_ d1upsa1 d1ajoa\_ d2hyka\_ dlajka\_  
d2vy0a\_ d1o4ya\_ d3o5sa\_ d3d6ea\_ d3atga\_ d1dypa\_ dlumza\_ d3i4ia\_  
d1c11a\_ d41bqa\_ d1slta\_ d4no4a\_ d3zsja\_ d3duia\_ dl1g86a\_ d1is3a\_  
d1qmja\_ d1hlca\_ g1qmo.1 g11en.1 d3zyra\_ d1fnya\_ d1n47a\_ g21tn.1  
d1avba\_ d3usua\_ d1dhkb\_ d1f9ka\_ dlukga\_ d1g8wa\_ d1g9fa\_ dlwbfa\_  
d3wcsa\_ dl1g7ya\_ g11oe.1 d1mvqa\_ d1hq1a\_ d1v6ia\_ d1dbna\_ dlqnwa\_



d1fx5a\_ d4l8qa\_ d1ioaa\_ d3n35a\_ d3ubra\_ d1qo8a1 d1d4ca1 d2k3va\_  
d1ft5a\_ d1qdba\_ d1mlqa\_ d2j7aa\_ d1h21a\_ d4fasa\_ d1jnia\_ d1oaha\_  
d1sp3a\_ d3h33a\_ d1rwja\_ d19hca\_ d1os6a\_ d3bxua\_ d3h4na\_ d1i77a\_  
d3caoa\_ d2ctha\_ d1duwa\_ d1ofwa\_ d2e84a\_ d1hh5a\_ d1gyoa\_ d3h34a\_  
d1wioa4 d1ccza2 d1vcaa1 d1dr9a2 d1ic1a1 d2d9qb1 d2nxyb2 d1adqa1  
d1fnga1 d1uvqb1 d1zs8a1 d2vola1 d2vola2 d1mfb12 d2jelh2 d1uwel2  
d3qq4b1 d1kjob\_ d1k5na1 d1osph2 d4odh12 d1ow0a1 d1ow0a2 d1bfob2  
d3l9ra2 d3jtth1 d2fath2 d4elkb2 d1fn4b2 d2xfxb\_ d1pg7x2 d1cqka\_  
d4k71b2 d1l1k2a1 d1eapb2 d4l1fhg2 d1i4fa1 d2nw2a2 d1kfah2 d1mhca1  
d1h3ua1 d1wejh2 d1h0db2 d1a5fh2 d1kcvh2 d1mjuh2 d1qqda1 d1kcrh2  
d1k8ia1 d3huja2 d2nnab1 d1nfd2 d3mffb2 d1s9va1 d1l1k3h2 d1q0x12  
d1fv1b1 d1neza1 d4rfeb2 d1r3ha1 d1a6tb2 d1kjva1 d1pz5b2 d1onqa1  
d2bc4a2 d1de4a1 d1k8da1 d1tcra2 d1dn0b2 d1nfde2 d2xwtb2 d1bfoa2  
d1mexh2 d1iakb1 d1ypzf2 d4f7ea2 d1q7212 d2fbjh2 d1fe8h2 d1clzh2  
d1fngb1 d1uvqa1 d1vgka1 d1c16a1 d4j12a2 d4x99b2 d1igtb3 d1je6a1  
d1q72h2 d1nldh2 d1teth2 d2hmic2 d1i1ca2 d1i1ca1 d1k8ib1 d1q0yh2  
d1kfal2 d3frua1 d1pg7w2 d1u58a1 d1igyb4 d1igyb3 d1hyrc1 d1klub1  
d1deeb2 d1c12b2 d2bc4b2 d2ig2h2 d1kcv12 d3wn5b1 d1l1k2b\_ d1l1k3l2  
d1mjul2 d1sm3h2 d1q0xh2 d1zvsal d1ydpal d1u8ib2 d1ypze2 d1kcuh2  
d1op9a\_ d1y0la1 d1letzb1 d1egj11 d2gsib1 d1nj9a1 d4jfh1 d1aqk11  
d1t2ja\_ d1llo4h1 d1zvyal d3v4v11 d4enec1 d1kxtb\_ d5e8ea1 d2pxya\_  
d4weud\_ d1xiwc\_ d2esvd1 d1qznh\_ d1ogae1 d1f4xh1 d4n1hb\_ d3ezjb1  
d3mlw11 d1kfah1 d1letza1 d1b4jh1 d3cfic\_ d4w68a\_ d2arja1 d1ek3a\_  
d2ok011 d1vera\_ d1uwgh1 d1blnb1 d1fpth1 d1rzga1 d2giya1 d4m3kb1  
d1nc2a1 d2nyyd1 d1ncna\_ d1fbih1 d5dxwa\_ d4fqqa1 d1dqdh1 d1jfq11  
d1kelh1 d1faih1 d1frgl1 d1figl1 d4m6n11 d1fo0a\_ d4hxb11 d3b5ga\_  
d3quyd1 d2h9gb1 d1i8kb\_ d2dd8h1 d2ck0h1 d1eaja\_ d4w6wb1 d2a6ib3  
d1t66d1 d2e27h\_ d1ob1b1 d1f11b1 d2v7na1 d1ad0a1 d2xt1b1 d1pskh1  
d4i13b1 d2op411 d1a0ql1 d1uwel1 d1za3a1 d1ncb11 d4uu9a\_ d1bm3h1  
d1cloh1 d1nqba2 d1cf8h1 d4y5va\_ d1mhph1 d5anma1 d4cdgc1 d4ldeb\_  
d1y0lb1 d2pcpb1 d1z3gl1 d1dfb11 d1fh5h1 d3g5xa1 d1tzb1 d4dn311  
d3zhka1 d2b1hh1 d2uylal d1f3dh1 d1nj9b1 d2agjh1 d2h1p11 d1q72h1  
d8fabbl d1ndmb1 d1rjca1 d4u6hb1 d3upca\_ d2fbj11 d1osph1 d1tvda\_  
d2cjh\_ d4fhbd1 d1bd2d1 d1rz7h1 d3nn8a\_ d1blnal d1knoa1 d1nfdal  
d2bmkb1 d1dq11\_ d1igyb1 d1igf11 d12e8h1 d3utza1 d1nc2b1 d1rihh1  
d4mwfb1 d4jvpa1 d1mieh1 d1rhfa1 d1fgn11 d1sbsh1 d1lp9e1 d1dn0a1  
d4lqf11 d1iaih1 d1kgcd1 d1mh5b1 d1gpol1 d2g60h3 d1f8t11 d2jixd1  
d4grwh\_ d1fo0b\_ d1bfob1 d1axsa1 d1u9ka\_ d1nmbh\_ d1h8na1 d1h8na2  
d1jguh1 d4eural d3sdy11 d35c8h1 d1w7211 d1mvub\_ d1i9rh1 d1ob1a1  
d4wenb\_ d1yeeh1 d3ietc1 d1f58h1 d1ad0b1 d1mqk1\_ d1nbvh1 d4b50a\_  
d3r8bb\_ d1baf11 d1mamh1 d4rgne1 d2gsgb\_ d35c811 d1bafh1 d1ailh1  
d2pcpa1 d2fath1 d2x1pa\_ d1orsb1 d1ibgl1 d1shma\_ d1a2yb\_ d1u0qa\_  
d2coqa\_ d1hilb1 d1qfwi\_ d1jv5b\_ d1fn4b1 d5e0qa\_ d1nsnh1 d1plgl1  
d4ocx11 d1kb5h1 d1rzfh1 d1pg7x1 d2fx7h1 d2oi9c\_ d1l17i11 d3eyval

d1d5i1l d4fffy1\_ d1tet1l d1a6wh\_ d1ac6a\_ d3dvfa\_ d1nfdel d1mimh1  
d1ri8a1 d1jhlh\_ d3dura\_ d1fskb1 d1f97a1 d3so3b1 d2ak4d1 d1lp9f1  
d4z7wf1 d1l7th1 d4y5ya\_ d4x7ec1 d1emth1 d1ikfl1 d1nlbh1 d4utal1  
d1bjma1 d1eapb1 d1u6ah1 d2dtgd1 d1kj2b\_ d1xeda1 d1cleh1 d1fgvh\_  
d2bnub1 d2fb4h1 d2dtgb1 d1ktrh\_ d1jpth1 d1qkz1l d4hepg\_ d2atpb1  
d1flrh1 d2hrpl1 d1mvfa\_ d1iaim1 d3k80a1 d2jb5h1 d3zkxc\_ d4grwe\_  
d1it9h1 d1rhhb1 d3w9ec\_ d1e4wh1 d1sy6h1 d2j6eh1 d3qxta\_ d1jglh1  
d1p7ka1 d1tzhb1 d4n8pa1 d1gaf1l d2jelh1 d1wioa2 d4i0cc1 d1cicb1  
d1lmka2 d1lmka1 d1iqwh1 d1lorqb1 d1ejoh1 d1jnlh1 d4zg1a\_ d43c9b\_  
d1ggb1l d1wejh1 d3q6fa1 d1f3dj1 d3c6la1 d1bqlh1 d3p9wb\_ d1a3rl1  
d1h0db1 d2uzil\_ d1eo8l1 d1qfwl\_ d1n7ml1 d1igja1 d1c5ch1 d2a9mh\_  
d1rmfh1 d1fj1b1 d4heme\_ d1ccza1 d1a5fh1 d1ogad1 d1dlfh\_ d1qa9b\_  
d1vge1l d3qskb\_ d1sjxa\_ d4ozfg1 d1sq2n\_ d1qd0a\_ d1kcvh1 d1c5db1  
d3qcul1 d8faba1 d3bn9d1 d1mjuh1 d4y8dc\_ d7fabh1 d3dvgb1 d1lo0l1  
d1a6tb1 d1gigh1 d1kcrh1 d2hwz1l d1yjdc1 d3clfl1 d4krna\_ d1dl7l\_  
d1e6ol1 d1mexh1 d3r0ma\_ d4kkna\_ d1fns1l d1loaqh\_ d1rzia1 d1lucbh1  
d1ncw1l d4b41a\_ d1nfdfl d2mpah1 d2d7tl1 d4grwf\_ d4b5ea\_ d1lk3h1  
d3u79a\_ d4u3xa\_ d1ghfl1 d1bvkb\_ d1mcww1 d1b88a\_ d1jrhh1 d32c2b1  
d4wemb\_ d1dsfh\_ d1op3h1 d1ce1l1 d1iqda1 d1qoka1 d1qoka2 d1qfuh1  
d2crya1 d1ay1h1 d1oaql\_ d3ab0b\_ d1rur1l d1t4kb1 d1bz7b1 d1n0xh1  
d1for1l d1lucb1l d4w6yb\_ d43c9a\_ d2aab1l d1tzia1 d4n1ca\_ d1k6qh1  
d3g9ab\_ d4tvsa1 d1igmh\_ d1pz5b1 d3dx9a1 d3wxwh\_ d1nakh1 d1kcull1  
d3eaka\_ d4qlra1 d1cr9l1 d1d9ka\_ d1f4x1l d1deea1 d2i27n2 d1c12a1  
d2orb1l d1j8hd1 d1mcp1h d1c5da1 d1kenh1 d1bd2e1 d1h5ba\_ d4x7fc1  
d3upaa\_ d1t3fa1 d1indh1 d2dtgc1 d4hc1l1 d1zv5a1 d4wgvb\_ d1uwgl1  
d4f37k1 d1aqkh1 d1vesa\_ d3zkqd\_ d1fpt1l d1lo4l1 d1knob1 d3rrqa\_  
d1ct8b1 d4orz\_ d1mlbb1 d4hgkc1 d1dqd1l d1bogb1 d4ozhe1 d1dr9a1  
d1i7za1 d1dn0b1 d1kell1 d1rzib1 d1ypzf1 d1wtla\_ d1hkfa\_ d1fail1  
d1figh1 d2vyre\_ d1sjva\_ d1ohqa\_ d1bfoa1 d1pkqb1 d1mjul1 d1b4jl1  
d1nsn1l d2arjb1 d1p4bh\_ d4aj0a\_ d3nn8b\_ d2rcja1 d1f2xk\_ d4v1dd\_  
d1adqh1 d2eksa\_ d4k3ga\_ d1jfqh1 d1uweh1 d1frgh1 d4gftb\_ d1uz8b1  
d4n1ea\_ d1bm3l1 d1clol1 d3mcka1 d2vq1a1 d1ae6h1 d4aq1b1 d1uj3b1  
d1nbqa1 d1fh5l1 d2ck0l1 d2ywza\_ d1q72l1 d4nxbx\_ d1hila1 d4hzlb1  
d2j88l1 d1zmya1 d1cd0a\_ d1a4ka1 d1pskl1 d1a0qh1 d4krmb\_ d1ncbh1  
d2fbjh1 d1j8he1 d1i3ua\_ d1cf8l1 d1fe8h1 d2p1ya1 d1eeqa\_ d2x89a\_  
d1ol0a\_ d2r0lh1 d1ub5a1 d1dfbh1 d3eyvb1 d4jdvb1 d4p2cg\_ d2gsia1  
d2agj1l d1u3ha1 d2h1ph1 d1rihl1 d1fskc1 d1boga1 d2a77l1 d1osp1l  
d1qfoa\_ d3dwta\_ d2fx7l1 d1rz7l1 d3stba1 d1pkqa1 d1b6da1 d1dzba2  
d1dzba1 d1kj2a\_ d4l1ha\_ d1rzgb1 d1dqlh\_ d12e8l1 d1miel1 d1jmaa\_  
d1sbs1l d1fgnh1 d1f58l1 d1mqkh\_ d1ndgb1 d3qegl1 d1iail1 d2aw2a1  
d1tqbc1 d3fo2a1 d4dkaa\_ d1f8th1 d2g60l1 d2ywya\_ d1uj3a1 d1yc7a\_  
d3bd3a\_ d4w6xb1 d1nmb1\_ d1i8ka\_ d1rjlb1 d1ypze1 d1p7kb1 d1kxqe\_  
d1gpoh1 d2z4qa1 d1w72h1 d1i9rl1 d4qgya1 d4xt1c\_ d2qqnh1 d1cical  
d3c08h1 d2cd0a\_ d2bdnh1 d1hnga1 d1mam1l d1nldh1 d1cr9h1 d4lcih1

d3bkyh1 d3qg7l1 d1ai1l1 d1kxvc\_ d4iosd\_ d1l7ih1 d2x1qa\_ d1ub6b1  
d3k74b\_ d1libgh1 d1teth1 d1lgya1 d1hxma1 d2x6ma\_ d2e7la\_ d5e03a\_  
d1qfwm\_ d2r0kh1 d1lqj1b1 d1rurh1 d1plgh1 d1mj8h1 d1yuhb1 d3fmg1l  
d1rzf1l1 d1emt1l1 d1ad9b1 d1lgtb1 d1nlbl1 d1d5ih1 d3k7ua\_ d4ffyh\_  
d1bwwa\_ d3dvga1 d1a6ta1 d1fgvl\_ d4qxgl1 d1mim1l1 d1jhl1\_ d2hffb1  
d2hh0l1 d1qkzh1 d1l7t1l1 d1afvh1 d1iaii1 d2cjuh\_ d1um5h1 d2ghwb2  
d2ghwb1 d1kgce1 d2fgwh1 d1likfh1 d1dvfd\_ d2i24n1 d2xtjb\_ d1za3b1  
d2yc1a\_ d2hh0h1 d2x1oa\_ d1bvka\_ d1rjla1 d5e7ba1 d1lqta1 d1il1b1  
d2fb4l1 d1mvua\_ d1jpt1l1 d32c2a1 d1fvca\_ d1iqdb1 d2hrph1 d2p4ab\_  
d4qo1a\_ d1p2cb1 d1wt5c\_ d1t4ka1 d5c1mb\_ d1it9l1 d1bz7a1 d1b2wh1  
d1e4wl1 d1jnl1l1 d1yedb1 d1za6b1 d3u7aa\_ d1lqfh1 d3gnml1 d1orsa1  
d1wejl1 d1a2ya\_ d1hxmb1 d1gafh1 d2j4wh1 d1pz5a1 d1j05a\_ d1a3rh1  
d4fq1l1 d1qfwh\_ d1eo8h1 d1n7mh1 d4s11a\_ d1kegh1 d5da4a\_ d1iqwl1  
d3whxb1 d1vgeh1 d1deeb1 d1c12b1 d1t2ql1 d1ad9a1 d3gsnb1 d3b2uc1  
d1ggbh1 d1t3fb1 d1nak1l1 d4ocmc\_ d1lila1 d2v7hb3 d2esve1 d1mcoh1  
d2qr0b1 d2q3aa\_ d1ct8a1 d1kcr1l1 d2pxyb\_ d2uzih\_ d5c3ld\_ d3durb\_  
d1c5c1l1 d2ak4e1 d1dl7h\_ d1xiwd\_ d1mlba1 d1rmfl1 d1i7zb1 d1dlfl\_  
d2xa3a\_ d5bq7b1 d1dqqb1 d3h42l1 d1legjh1 d1kcvl1 d1fe8l1 d2j6e1l  
d1f3rb2 d1l1k3l1 d1sm3h1 d1q0xh1 d1ghfh1 d7fabl1 d1lqch1 d1lo0h1  
d4idl1a\_ d5c2b1\_ d1jrh1l1 d1il1a1 d3zhda1 d4kfzc\_ d1b0wa\_ d1e6oh1  
d1mex1l1 d4krpb\_ d1fnsh1 d1ncwh1 d4hgma\_ d4eigb1 d4rzca\_ d2mpa1l  
d4y5xa\_ d5en2b1 d3lrga1 d4ej1c1 d1rhha1 d1j05b\_ d1forh1 d1q9wb1  
d2wzpd\_ d2aq2a1 d1h0da1 d3revb1 d2ij0c1 d1tzha1 d4m7j1l1 d1k6ql1  
d3b9kc1 d1lqml\_ d3qeua1 d1dsfl\_ d1celh1 d1kcuh1 d1zvha1 d1zvoa1  
d1tqbb1 d1ay1l1 d2qsc1l1 d2cgrh1 d1nl0h1 d1ken1l1 d3eo0a1 d4n9ob1  
d1n0xl1 d3k1kc\_ d2aq2b1 d1ck1a1 d1lenfa1 d1i4pa1 d1v1oa1 d1et9a1  
d1esfa1 d2g9hd1 d4ohja1 d1klud1 d1bxta1 d1eu3a1 d1ty0a1 d1fnua1  
d2cqva1 d1fhga\_ d2k1ma\_ d2dl2a1 d1biha3 d1biha1 d1biha4 d3qp3a1  
d1g1ca\_ d1gxea\_ d1cvsc2 d1cvsc1 d1xmwa2 d1m4ka2 d2otpa2 d1biha2  
d1rhfa2 d2fcba2 d2fcba1 d1wwbx\_ d1gsma2 d1lepfa1 d1lepfa2 d2dava1  
d1waaa\_ d1f97a2 d1x44a1 d1vcaa2 d1fnla2 d1fnla1 d3b5ha2 d3h8na2  
d3h8na1 d1jbja1 d1jbja2 d1pd6a\_ d1f2qa2 d1f2qa1 d3cx2a\_ d1nbqa2  
d3b5ha1 d1n26a1 d1xiwb\_ d1xaua\_ d1fltx\_ d2ifga1 d1olla1 d1olla2  
d1cs6a4 d1cs6a3 d1cs6a2 d1cs6a1 d2gw5a2 d1sy6a1 d1xiwa\_ d1lucta2  
d1lucta1 d1ry7b2 d1qz1a3 d1olza1 d2c9aa1 d1wwca\_
